# Supplementary material
Source: PubMed Central journal article supplement (PMC2148295)
Supplement: 0708072104_1.pdf [file 0708072104_1.pdf]

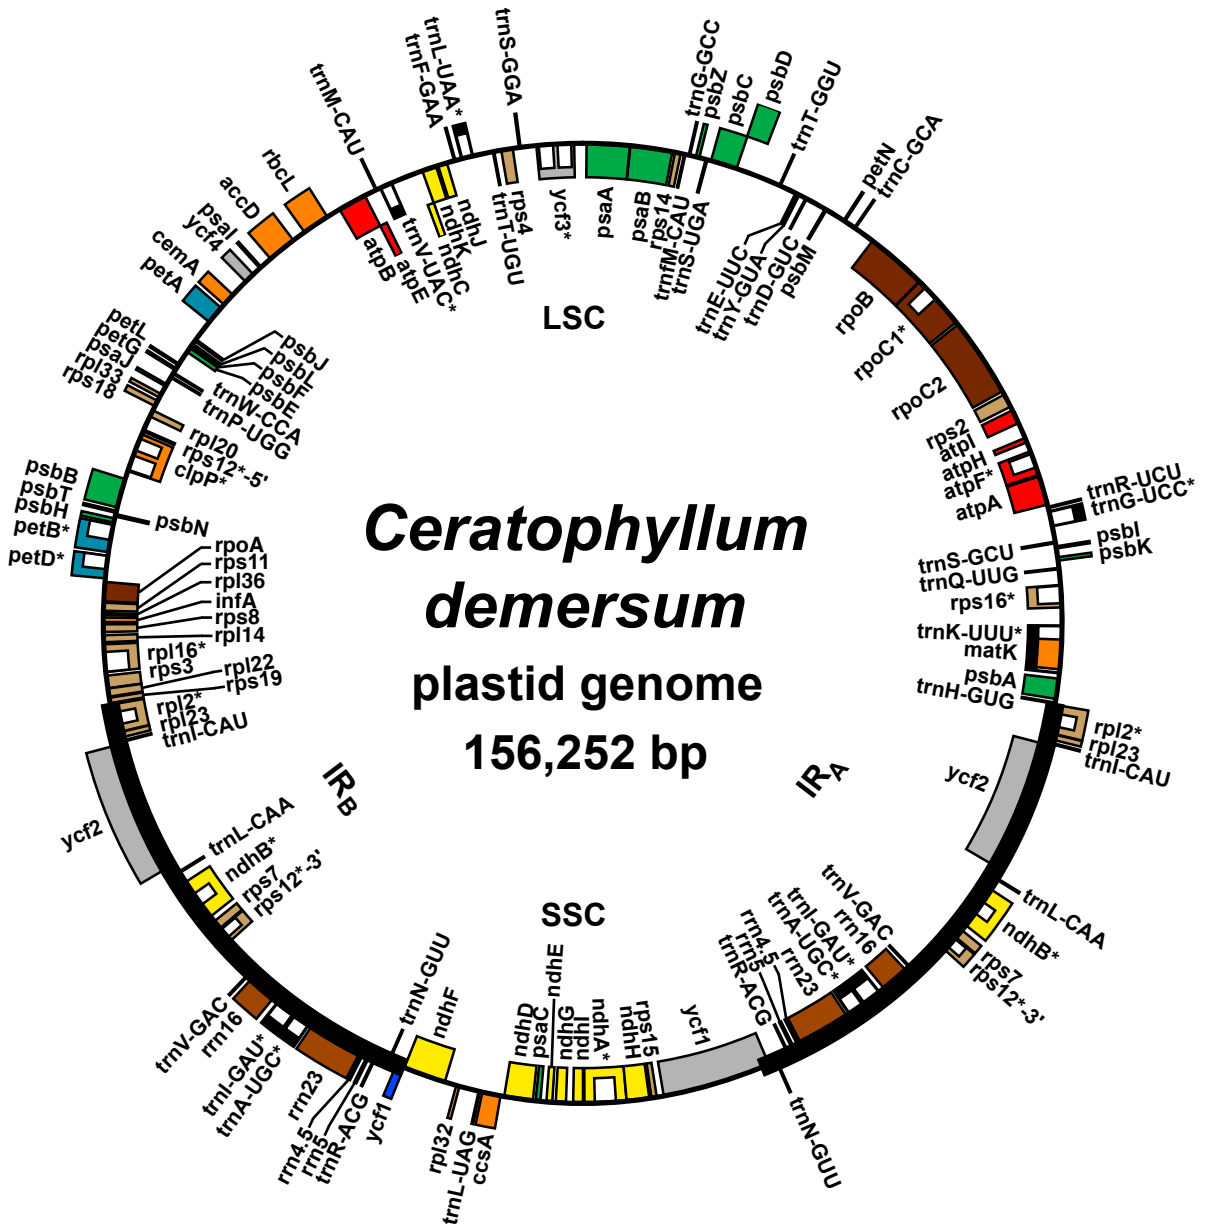

- |               |                     |                   |                      |
|---------------|---------------------|-------------------|----------------------|
| ■ tRNA        | ■ ATP synthase      | ■ Cytochrome b6/f | ■ NADH dehydrogenase |
| ■ Photosystem | ■ Ribosomal protein | ■ rRNA            | ■ RNA polymerase     |
| ■ Other       | ■ ycf               | ■ Pseudogene      |                      |
