# Supplementary material
Source: PubMed Central journal article supplement (PMC2148295)
Supplement: 0708072104_18.pdf [file 0708072104_18.pdf]

TTCTCGTTAAGTTACGTACCTACTTAAAAAGAATAAACCTCAGTTTCAAGAAATCATATCTTCTACCAAGACCTTTACC  
GAGGAAGCAGAAGCTCTTTTGAAGGAAGCTATTTCAGGAGCAGCTCGAACTCTTTCTA---CTTCAGGAACAA-----  
-----ATGAGAATAACTCCTACTACTTCTGGTTCTGCG-----  
GTTCCCTCACTTGACGAGAAAACTTAGGGCGTATCGTCCAAATCATTGGCCCAGTACTGGATGTCGCCTTTCCCCGGG  
AAAGATGCCTAATATTTACAACGCTTTGGTGGTTAAGGGTCGAGATACTGCCGGTCAGCCAATTAATGTGACTTGTGAGG  
TACAGCAATTATTAGGAAATAATCGGGTTCGAGCTGTGGCTATGAGTGCTACAGATGGTTTTCGAGAGGAATGGAAGTG  
ATTGACACGGGAGCTGCTCTAAGTGTTCAGTCCGGTGGAGCTACTCTCGGAAGAATTTTCAACGTTCTTGGGGAGCCCGT  
TGATAATTTAGGCCCTGTAGATACTCGCACAACTCTCCTATTTCATAGATCTGCGCCTGCATTTATACAGTTAGATACGA  
AATTATCAATCTTTGAAACAGGCATTAAGTGGTAGATCTTTTAGCTCCTTATCGCCGGGGAGGAAAAATCGGACTATTT  
GGGGGAGCTGGAGTGGGTAAAACAGTACTCATCATGGAATTGATCAACAACATTGCCAAAGCGCATGGAGGTGTATCCGT  
ATTTGGCGGAGTAGGCGAGCGTACTCGTGAAGGAAATGATCTTTACATGGAAATGAAAGAATCCGGAGTAATTAATGAAG  
AAAAGATTGAAGAATCTAAAGTAGCTCTAGTGTATGGTCAGATGAATGAACCGCCGGGCGCTCGTATGAGAGTTGGTTTG  
ACTGCCCTAACCATGGCGGAATATTTCCGGGA  
Amborella -----  
-----  
-----  
-----  
-----  
-----  
-----ATGAAAAA-----TGTGGGTTCAATTCGATGTTGTCT-----  
AATGAAGAGTTAGAGCACAAGTGTGAACTAAGTAAATCGATGGACAGT---CTTGGT---CTTATTGGAAATACC-----  
-----GGTGCAGGTGGAGGCCCTACTCTA-----  
-----ATATTC-----  
GATGTCAGGGACATTTTGAGTTTGATCTATGATGACACTTTTAAGCTT-----  
AAGGATAGGAATGGTGACAGCTATTCCGTATATTTTGATATTGACAATAAGATCTTTGAGATTGACGATGATAGTGACTC  
TCTGAGTGGACTAGATATTGAAAATCAGAATCAGATCTTCTTTGATATTTACAATGATAGTGACTCTCTGAGTGAAGTAG  
ATAGTGAAAATAAGAACTTTGAGATTCACAAT-----GAGAGTGACTTTATGAGTAAACTAGAA-----  
AGTCTTTTTTTAGTTATCTCACTTATAGTTGTCTCAAACGAAGAAGTTCTTTTTCTAGTTATCCTACTTCTCTCACTTC  
TAGTAAT---CTC-----AATAGTGG-----TCTAAGAGTTACAAC---  
CCCTACTATGATCCTTAC-----ATGCATGAC-----  
ACTAGATATAGTTGGAATAATGACATTAACATTAATAGTTGCATTGACAGTTATATT-----CGTTGTGAAATC-----  
-GAT-----TCCATTTCAAGTGGTAGCGACAATTGC-----AGTGACAGT-----  
-----TATATTTATAGTTACATCTGT---  
AGTGAGGGG---GTA---AGTTATAGTGACAAT-----  
GGGAGTCTAGTATAAGAATAAGAACTAGACTAGTAGT-----GGCAGTTCTTAC---  
CATATAAGAGGAAGATCT-----AATAATTTT-----GAGAAAAAT---  
AAAAAATTAATAAATATGGGTTCAATGCGAG-----AATTGTTATGCATTGAAT-----  
TATAATAAATATTTAGGTCTAAAATGAATGTTTGT-----  
GAACAATGTGGATATCACTTGAATAATGAGTAGTTTCAGATAGAATCGAACTCTCGATTGATCCAGGCACCTTGGCATCCT--  
-ATG---GAT---GAAGATATGGTCTCCACGGATCCTATT---GAATTTTCAT-----  
-----TCGGAGGAGGAACCT-----  
-----  
TATAGAGATCGCATCGATTCTTATCAAAGACAAGCAGGTTTAAACCGATGCTGTTCAAACAGGCATAGGTCAACTAGAAGG  
TATTCCGATAGCAATTGGAGTTATGGATTTTCAGTTTCATGGGAGGTAGTATGGGATCCGTAGTAGGCGAGAAAAATAACTC  
GTTTGATCGAGTATGCTATTGATAGATCTCTCCAGTTGTTATTGTGTGTGCTTCTGGAGGAGCACGCATGCAAGAAGGA  
GGTTTGAGCTTGTAGCAAATGGCTAAAATATCTTCCGCTTCATATAATTAT-----  
CAATCCAATAAAAAAGTTATTCTATGTATCAATCCTTACATCTCCTACAACCGGTGGAGTGACTGCGAGTTTTCGGTATGTT  
GGGAGATATCATTATTGCCGAACCCAATGCCTACGTAGCATTTCAGGCAAAAAGAGTAATTGAAGAAACATTAATAAGA  
AAATACCTGATGGTTTGCAAGTAGCTGAGTATTCAATCCATAAGGGCTTATTTCGATTCAATCGTACCACGTAATCCTTTA  
AAAGGTGTTCCAAGTGAATTTTTCAGCTCCACGGTTTCTTTTCTTACTTTCCATCCCCTTAAATCAAATAAAGTAA  
GCGCTAA-----ATGGTAACC-----  
ATTCGAGCTGACGAAATTAGTAATATTATCCGTGAACGGATTGAGCAATATAATAGAGAAGTAAAGATTGTCAATACTGG  
CACTGTACTTCAAGTGGGCGACGGCATTGCTCGTATTTCATGGTCTTGATGAAGTAATGGCGGGCGAATTAGTAGAATTTG  
AAGAGAGTACAATAGGCATTGCTCCAAATTTGGAATCCAATAATGTTGGTGTGTATTAATGGGTGATGGTTTAAATGATA  
CAAGAGGGCAGTTCTGTAAAAGCAACAGGAAGAATTGCTCAGATACCAGTGAGTGAGGCTTATTTAGGTCGTGTTATAAA  
TGCTCTGGCTAAACCTATTGATGGGAGAGGTGAAATTTTCATCTTCCGAATCTCGGTTAATTGAATCCCCCGCACCAGGTA  
TTATTTTCGAGACGTTCCGTATATGAACCTCTTCAAACAGGTCTTATTGCTATTGATTCCATGATTCCATAGGACGCGGT

CAGCGAGAATTAATTATTGGGGACAGACAGACCCGGTAAAACAGCCGTAGCTACAGATACTATTCTGAATCAAAAGGGGCA  
AAATGTAATATGTGTTTTATGTAGCTATTGGTCAAAAAGCATCTTCCGTGGCTCAGGTAGTGACTACTTTCCAGGAACAAG  
GAGCAATGGAATACACTATTGTGGTAGCTGAAACGGCGGATTACCTGCTACATTACAATACCTCGCTCCTTATACAGGA  
GCAGCCTTGGCTGAATATTTTTATGTACCGTGAACGACATACTTTAATAAATTCATGATGATCCCTCTAAACAAGCACAAGC  
TTATCGCCAAATGTCTCTTCTATTAAGAAGACCCGCTGGTGCAGGAGCTTATCCAGGAGATGTTTTTTATTTGCATTCCC  
GACTTTTTGGAAAGAGCCGCTAAATCAAGTTCTCGTTTTAGGCGAAGGAAGTATGACTGCTTTACCAATAGTTGAGACTCAA  
TCTGGGGACGTTTTCGGCTTATATTCCCCTAATGTAATTTCCATTACAGATGGACAAATCTTCTTATCTGCCGATCTATT  
CAATGCTGGAATCCGGCCTGCTATTAATGTGGGTATTTCCGTTTTCCAGAGTAGGATCCGCAGCTCAAATTAAGCTATGA  
AACAAGTAGCTGGCAAATCAAAATTGGAACGGCTCAATTTGCAGAGTTAGAAGCCTTTGCACAATTCGCTTCTGATCTC  
GATAAAGCTACTCAGAATCAATTGGCAAGAGGTCAACGATTGCGCGAGTTGCTCAAACAATCCCAAGCAGCCCCCTCTCGC  
GGTGAAGAACAGGTAGTTACTATTTATACAGGAGCGAATGGGTATCTTGATCCATTAGAAAATTGGACAGGTGAAGAAAT  
TTCTCGTTACAGTTACGTACTTATTTAAGAACAATAAGCCTCAGTTCCAAGAAATCATATCTTCTACCCGGACGTTCCACC  
GAGGAAGCAGAAGCCATTCTGAAAGAAGCTATTCCAGGAACAGATAGAAGCTGTTTCTA---TTTCAGGAACAAAACA-----  
-----

ATGAGAATCAATCCTACTACTTCTGGTTCTGGTTCCGGGGCTTCTACACTTGCAGGAAAAAGCGTGGGACGTATCGCTCA  
AATCATTGGTCCGGTACTGGATGTAGCTTTTTCCCCGGGCAAGATGCCCAATATTTACAACCTTTTGGTAGTTAAGGGTC  
GAGATACTGCCGGTACAGCAATTAATGTGACTTGTGAGGTACAACAATTATTAGGAAATAATCGAGTTAGAACGGTAGCT  
ATGAGTGCTACAGATGGTCTAATGAGAGGAATGGAAGTGATTGACACGGGAGCTCCTCTAAGTGTTCCGGTTGGCGAAGC  
TACTCTCGGACGAATTTTCAACGTTCTTGGAGAACCAGTTGATAATTTAGGTCCTGTAGATACTCGCACAAACATCTCCTA  
TTCATAGATCTGCGCCTGCCTTTATACAGTTAGATACCAAATTATCAATCTTTGAAACAGGCATTAAGTGGTGGATCTT  
TTAGCTCCTTATCGTCTGGAGGAAAAATCGGGCTATTCCGGGGAGCCGGAGTGGGTAAAACAGTACTCATCATGGAATT  
GATCAATAACATTGCCAAAGCTCACGGAGGTGTATCTGTATTTGGCGGAGTAGGAGAACGTACTCGTGAAGGAAATGATC  
TTTACATGGAAATGAAAGAATCCGGAGTGATTAATGAACAAAATATTGCAGAATCAAAAGTCGCTCTAGTCTATGGTCAG  
ATGAATGAACCGCCGGGAGCTCGGATGAGAGTTGGTTTAACTGCCCTAACAATGGCGGAATATTTCCGTGA

Arabidopsis

-----ATGGA AAAA-----TCGTGGTTCAATTTTTATGTTTTCT-----  
AAGGGAGAATTGGAATACAGAGGTGAGCTAAGTAAAGCAATGGATAGT---TTTGCT---CCTGGTGAAAAGACT-----  
-----ACTATAAGTCAAGACCGTTTTATA---TATGATATGGATAAAAACCTTTTTATGGTTGG-  
--GATGAGCGTTCTAGTTATTCTTCTAGTTATTCCAATAATGTTGATCTTTTAGTT-----  
AGCTCCAAGGACATTGCAATTTTATATCGGATGACACCTTTTTTTGTT-----  
AGGGATAGTAATAAGAATAGTTATTCTATATTTTTTTGATAAAAAAAAAAAAAATTTTTGAGATTGAC-----  
-----

-----AAT-----GAT-----TTTAGTGACCTAGAA-----  
AAATTTTTTTTATAGTTATTGT-----  
AGTTCTAGTTAT---CTA-----AATAATAGA-----  
TCTAAAGGTGACAACGATCTGCACTATGATCCTTAC-----ATTAAGGAT-----  
ACTAAATATAATTGTACTAATCACATT-----AATAGTTGCATTGATTCTTATTTT-----  
CGTTCTTACATCTGTATTGAT---AATAACTTTTTAATCGATAGTAATAATTTT-----AATGAAAGT-----  
-----

TACATTTATAATTTTCAATTTGT---AGTGAAAGC---GGA---AAGATTCGTGAAAGT-----  
-----AAAAATTACAAGATAAGAACT-----AAT-----AGGAATCGTAGT---  
AATTTAATA---AGTTCT-----AAGGATTTT-----GATATAACT---  
CAAACTACAATCAATTGTGGATTCAATGCGAC-----AATTGTTATGGATTAATG-----TATAAGAAA-----  
-GTCAAAATGAATGTTTGT-----  
GAACAATGTGGACATTATTTGAAAATGAGTAGTTTCAGAAAGAATCGAGCTTTTCGATTGATCCGGGTACTTGGAAATCCT--  
-ATG---GAT---GAAGACATGGTCTCTGCGGATCCCATT---AAATTTTCA-----  
-----TCGAAGGAGGAACCT-----  
-----

TATAAAAACCGTATTGACTCTGCGCAAAAAACTACAGGATTGACTGACGCTGTTCAAACAGGTACAGGTCAACTAAACGG  
TATTCCGGTAGCCCTTGGGGTTATGGATTTTCCGTTTTATGGGGGTAGTATGGGATCCGTAGTAGGCGAAAAAATAACTC  
GTTTGATCGAGTATGCTACCAATCAATGTTTACCTCTTATTTTAGTGTGTTCTTCCGGAGGAGCACGAATGCAAGAAGGA  
AGTTTAAGTTTGTATGCAATGGCTAAAATTTCTTCCGTTTTATGTGATTAT-----

CAATCAAGTAAAAAGTTATTCTATATATCAATTCTTACATCTCCTACTACCGGTGGAGTGACAGCTAGTTTTGGTATGTT  
GGGGGATATCATTATTGCCGAACCTATGCCTATATTGCATTTGCGGGTAAAAGAGTAATTGAACAAACATTGAAAAAG  
CCGTGCCTGAAGGTTACAAGCGGCTGAATCTTTATTACGTAAGGGCTTATTGGATGCAATTGTACCACGTAATCTTTTA  
AAAGGTGTTCTGAGCGAGTTATTTTCAGCTCCATGCTTTTTTTTCTTTTGAACACAAATTA-----

-----ATGGTAACC-----

ATTAGAGCCGACGAAATTAGTAATATTATCCGTGAACGTATTGAGCAATATAATAGAGAAGTAACGATTGTAAATACCGG  
TACCGTACTTCAAGTGGGCGATGGCATCGCTCGTATTTATGGTCTTGATGAAGTAATGGCAGGTGAATTAGTAGAATTTG  
AGGAGGGTACTATAGGTATTGCCCTTAATTTAGAATCCAATAATGTTGGTGTGTATTAATGGGTGACGGTTTTGATGATC  
CAAGAAGGAAGTTCAGTCAAAGCTACGGGAAAAATTGCTCAGATACCGGTGAGTGAGGCTTATTTGGGGCGTGTATAAA  
CGCCTTGGCTAACCCCTATTGATGGTTCGAGGTAAGATTTCCGCTTCTGAATCTCGGTTAATTGAATCTCCTGCCCCAGGTA  
TTATTTTCGAGACGTTCTGTATATGACCTCTTCAAACAGGACTATTGCTATTGATTCCATGATCCCTATAGGACGCGGC  
CAGCGAATAATTATTGGTGACAGACAGCCGGTAAAACAGCAGTAGCCACAGATACAATTCTCAATCAACAAGGCCA  
AAATGTAATATGTGTTTATGTAGCTATTGGTCAAAAAGCTTCTTCCGTGGCTCAGGTAGTGACCAGTTTACAGGAACGAG  
GGGCAATGGAATACACTATTGTGGTAGCTGAAACGGCCGATTCCCCAGCTACGTTACAATACCTCGCGCCTTATACAGGA  
GCAGCCTTGGCTGAATATTTTATGTACCGTGAACAACACACTTTAATAATTTATGATGATCTTTCCAAACAAGCACAAAGC  
TTATCGACAAATGTCTCTTCTATTACGAAGACCGCCGGTTCGTGAAGCTTATCCAGGAGATGTTTTTTATTTTACATTCAC  
GTCTTTTAGAAAGAGCCGCTAAATTAAGCTCTCAATTAGGTGAAGGGAGTATGACTGCCTTACCAATCGTCGAGACCCAG  
TCAGGAGATGTTTTAGCTTATATTTCTACTAATGTAATTTCCATTACAGATGGACAAATATTCTTATCCGCCGATCTTTT  
TAATGCTGGAATCAGACCTGCTATTAATGTAGGGATTTCTGTCTCGAGAGTAGGATCCGCCGCTCAAATTAAGCTATGA  
AACAGGTAGCTGGAAAATTAATAATTGGAATTGGCTCAATTGCTGAATTAGAAGCCTTTTCCCAATTTTCTTCTGATCTC  
GATAAAGCTACTCAGAATCAATTGGCAAGAGGTCAACGATTGCGTGAGTTACTGAAACAATCCAATCAGCCCCCCTCAC  
AGTGAAGAACAGATAATGACCATTTATACCGGAACAAATGGTTATCTGGATGGATTAGAAATTGGACAAGTAAGAAAAT  
TTCTCGTTCAATTACGCACTTACTTAAAAACGAATAAACCTCAGTTTTCAAGAAATCATAGCCTCTACCAAGACATTAACC  
GCTGAAGCAGAAAGCTTTTTGAAAGAAGGTATTCAAGAGCAACTAGAACGTTTTCTTA---CTTCAGGAGAAAAGTA-----

-----ATGAGAACAATCCTACTACTTCAAATCCAGAG-----

GTTTCGATACGTGAAAAAAAAAACCTGGGACGTATCGCCCAAATCATTGGTCCGGTACTGGATGTAGCCTTCCCCCGGG  
CAAAATGCCTAATATTTACAATGTCTCTGGTGGTTAAGGGTCGAGATACTCTTGGTCAAGAAATTAATGTGACTTGTGAAG  
TACAGCAATTAATTAGGAATAAATCGAGTTAGAGCTGTAGCTATGAGTGCAGACAGAGGGTTTAAAGAGAGGAATGGCAGTG  
TTGATATGGGAAATCCTCTAAGTGTTCAGTCGGCGGAGCGACTTAGGACGAATTTTCAACGTGCTTGGGGAACCCGT  
TGATAATTTAGGTCCTGTGATACTCGCACAAATCTCCTATCCATAAATCCGCGCCTGCTTTTATAGAATTAGATACAA  
AATTATCGATTTTTGAAACAGGAATTAAGTAGTAGATCTTTTGGCCCTTATCGTCGTGGGGGAAAAATTGGACTATTC  
GGTGGGGCTGGCGTGGGTAAAACAGTACTAATTATGGAATTGATCAACAACATTGCTAAAGCTCATGGTGGTGTATCCGT  
ATTTGGTGGAGTAGGCGAACGGACTCGTGAAGGAAATGATCTTTACATGGAAATGAAAGAATCTGGAGTCATTAATGAAC  
AAAATCTTGCAGGAATCCAAAGTGGCCCTAGTTTTATGGTCAGATGAATGAACCGCCAGGAGCTCGTATGAGAGTTGGTCTG  
ACTGCCTTAATATGGCAGAATATTTCCGAGA

Atropa

ATGACTATTCATCTATTGTATTTTCATGCAAATAGGGGGCAAGAAAACCTCTATGGAAAGA-----  
TGGTGGTTTAATTCGATGTTGTTT-----AAGAAGGAGTTCGAACGCAGGTGTGGGCTAAATAAATCAATGGGCAGT--  
-CTTGGT---CCTATTGAAAATACC-----AGTGAAGATCCAAATCGA---  
AAAGTG-----AAAAACATTCATAGT-----TGC---  
AGTAATGTTGATTATTTATTC-----GGCGTTAAAGACATTCGGAATTTTCTCTCTGATGACACTTTTTTTAGTT--  
----AGTGATAGGAATGGAGACAGTTATTTCCATCTATTTTGTATTTGAAAATCAGATTTTTGAGATTGAC-----

-----AAC-----GATCATTCTTTTCTGAGTGAAGTAGAA-----  
AGTTCTTTTTATAGTTATCGA-----  
AACTCGAGTTAT---CTG-----AATAATGGA-----TTTAGGGGCGAAGAT---  
CCCTACTATAATTCTTAC-----ATGTATGAT-----ACTCAATATAGTTGGAATAATCACATT-----  
AATAGTTGCATTGATAATTATCTT-----CAGTCTCAAATCTGTATAGAT---  
ACTTCTATTATAAGTGGTAGTGAGAATTAC-----GGTGACAGT-----  
-----TACATTTATAGGACCATTTGTGGTGGTGAAAGT---  
CGA---AATAGTAGTGAAAAT-----GAGGGTTCCAGTAAACGAACT-----  
CGCACGAAG-----GGCAGTGATTTA---ACTATAAGAGAAAGTTCT-----

AATGATCTC-----GAGGTAAC---CAAAAATACAGGCATTTGTGGGTTCAATGCGAA-----  
AATTGTTATGGATTAAAT-----TATAAGAAATTTTTGAAATCCAAAATGAATATTTGT-----  
GAACAATGTGGATATCATTGAAAATGAGTAGTTCGGATAGAATTGAACTTTTGATTGATGCGGGTACTTGGGATCCT--  
-ATG---GAT---GAAGACATGGTCTCTCTGGATCCCATT---GAATTTTCAT-----  
-----TCGGAGGAGGAGCCT-----

TATAAAGATCGTATTGATTCTTATCAAAGAAAGACAGGATTAACCGAGGCTGTTCAAACAGGCATAGGCCAACTAAACGG  
CATTCCCCTAGCAATTGGGGTTATGGATTTTCAGTTTATGGGGGTAGTATGGGATCCGTAGTCGGAGAGAAAAATCACCC  
GTTTGATTGAACACGCTGCCAATCAAATTTTACCTCTTATTATAGTGTGTGCTTCCGGTGGGGCGCGCATGCAGGAAGGA  
AGTTTGAGCTTGATGCAAATGGCTAAAATATCGTCTGCTTTATATGATTAT-----  
CAATTAATAAAAAATTTTTATGTATCAATCCTTACATCTCCGACAACCTGGTGGAGTGACAGCTAGTTTTGGTATGTT  
GGGGGATCATTATTGCGGAACCCAATGCCTACATTGCATTTGCAGTTGACAGTAAAAGAGTAATTGAACAAACATTGAATAAAA  
CAGTACCCGAAGGTTTACAAGCAGCTGAATACTTATTCCAGAAGGGTTTTATTTCGACCAAATTGTACCACGTAATCTTTTA  
AAAAGCGTTCTGAGTGAATTTAAGCTCCACGCCTTTTTTCTTTGAATCAAAGTCAAGCAAATCAAGTAG-----  
-----ATGGTAACC-----

ATTCGAGCTGACGAAATTAGTAATATTATCCGTGAACGTATTGAACAATATAATAGAGAAGTAAAGATTGTAAATACCGG  
TACCGTACTTCAAGTAGGCGATGGCATTGCTCGTATTACCGTCTTGATGAAGTAATGGCGGGTGAATTAGTAGAATTTG  
AAGAGGGTACAATAGGCATTGCTCTGAATTTGGAATCAAATAATGTTGGTGTGTATTAATGGGCGATGGTTTTGTTGATA  
CAAGAAGGAAGTCTGTAAAAGCAACGGGAAGAATTGCTCAGATACCGGTGAGTGAGGCTTATTTGGGTCGTGTTGTAAA  
TGCCCTGGCTAAACCTATTGATGGCAGAGGTGAAATTTTCAGCTTCTGAATTTTCGATTAATTGAATCTGCCGCCCCAGGTA  
TTATTTTCGCGCCGTTCCGTATATGAGCCTCTTCAAACCGGGCTTATTGCTATTGATTGATGATCCCTATAGGGCGTGGT  
CAGCGAGAATTAATTATTGGGGACAGACAGACCCGGTAAAACAGCAGTAGCCACAGATACGATTCTCAATCAACAAGGGCA  
AAACGTAATATGTGTTTATGTAGCTATTGGGCAAAAAGCATCTTCTGTGGCCCAGGTAGTAACTACTTTACAGGAAAGGG  
GAGCGATGGAATACACTATTGTGGTAGCCGAAACGGCAGATTCCCCTGCTACATTACAATACCTTGCTCCTTATACAGGA  
GCATCTCTGGCTGAATATTTTATGTATCGTGAACGACACACTTTAATCATTATGATGATCTCTCAAACAAGCGCAAGC  
TTATCGCCAAATGTCTCTTCTATTACGAAGACCCCGGTCGTGAAGCTTATCCAGGAGATGTTTTTTATTTGCATTAC  
GCCTTTTGGAAAGAGCCGCTAAATTAAGTCTTAGTTTAGGTGAAGGATGACCGCCTTACCAATAGTTGAAACTCAA  
TCGGGAGATGTTTTCGGCTTATATCCTACTAATGTAATTTCCATTACTGATGGACAAATCTTCTTATCCGCCGACCTATT  
CAATTTGGAATCAGACCCGCTATTAATGTGGGTATCTCCGTTTTCCAGAGTGGGGTCCGAGCTCAAATAAAAGCCATGA  
AACAAGTAGCTGGTAAATTAATAAGTAACTAGCAATTCGCAGAATTAGAAGCCTTTGCACAATTTGCTTCTGATCTC  
GATAAAGCTACTCAAAATCAATTGGCAAGAGGTCAACGATTACGTGAATTGCTTAAACAATCCAATCAGCTCCTCTCAC  
GGTAGAAGAGCAGATAATGACTATTTATACCGGAACAAACGGCTATCTTGATTCAATTAGAAGTTGGACAGGTAAGGAAAT  
TTCTTGTTGAGCTACGTACTTACTTAAAACTAATAAACCTCAGTTCAGGAAATCATATCTTCTACCAAGACATTTACC  
GAGGAAGCAGAAGCCCTTTTGAAGAAGCTATTACAGGAACAAATGAAACGTTTTATA---CTTCAGGAACAAGCA-----  
-----ATGAGAATCAATCCTACTACTTCTGGTTCTGGG-----

GTTTCCACGCTTGAAAAAAAACCTGGGGCGTGTCTGTCCTCAATCATCGGTCCGGTACTAGATGTAGCCTTTCCCCCGGG  
CAAGATGCCGAATATTTATAACGCTCTGGTAGTTCAAGGTCGAGATAGTGTGGTCAACCAATTAATGTGGCTTGTGAGG  
TACAGCAATTTAGGAAATAATCGAGTTAGGGCTGTAGCTATGAGTGTACAGACGGTCTAACGAGAGGAATGGAAGTG  
ATTGACAAAGGAGCTCCTATAAGTGTTCGGTCCGGGGAGCGACTCTGGGACGAATTTTTAACGTGCTCGGAGAGCCTGT  
TGATAATTTAGGGCCTGTAGATACTAGTACAATGTCTCCTATTATAGATCTGCGCCCGCCTTTATACAGTTAGATACAA  
AATTATCTATTTTTGAAACAGGAATTAAGTAGTAGATCTTTTAGCCCTTATCGCCGTGGAGGAAAAATCGGACTATTC  
GGGGGAGCTGGAGTGGGTAAAACAGTACTCATTATGGAATTGATTAACAATATTGCTAAAGCTCACGGGGGCGTATCCGT  
ATTTGGCGGAGTGGGTGAACGTAACGTAACGTAACGTAACGTAACGTAACGTAACGTAACGTAACGTAACGTAACGTAACG  
AAAATATTGCAGAATCAAAGTGGCCCTAGTTTACGGTACAGATGAATGAACCGCCGGGAGCTCGTATGAGAGTTGGTTTTG  
ACTGCCCTAACTATGGCGGAATATTTCCGAGA

Buxus

-----  
-----  
-----  
-----  
-----  
-----  
-----  
-----  
-----  
-----

-----ATGGTAACC-----  
ATTCAAGCCGACGAGATTAGTAATATTATCCGTGAACGTATTGAGCAATATAATAGAGAAGTAAAGATTGTGAATACCGG  
TACCGTACTTCAAGTAGGCGACGGCATTGCTCGTATTCATGGTCTTGATGAAGTAATGGCAGGTGAATTAGTAGAATTTG  
AAGAGGGTACAATAGGCATTGCTCTGAATTTGGAATCAAATAATGTTGGTGTGTGATTAATGGGTGACGGTTTGTATGATA  
CAAGAGGGGAAGTTCTGTAAAAGCAACAGGAAGAATTGCTCAGATACCGGTGAGCGAGGGTTATTTGGGTCTGTGTTATAAA  
TGCTCTGGCTAAACCTATTGATGGTAGAGGTGAAATTTTCAGCTTCTGAATCTCGGTTAATTGAATCTCCCGCCCCAGGTA  
TTATTTTCGAGGCGTTCCGTATATGAGCCTCTTCAAACGGGGCTTATTGCTATTGATTTCGATGATCCCTATAGGACGCGGT  
CAGCGAGAATTAATTATTTGGGGACAGACAGACCCGGTAAAACAGCAGTAGCCACAGATACGATTCTCAATCAAAAAGGACA  
AAATGTAATATGTGTTTATGTAGCTATTGGTCAAAAAGCATCTTCTGTGGCTCAGGTAGTGACTACTTTCCAGGAAAGGG  
GGGCGATGGAATACACTATTGTGGTAGCCGAAACGGCGGACTCGCCTGCTACATTACAATATCTTGCTCCTTATACAGGA  
GCGGCTCTGGCTGAATATTTTATGTACCGTGAACGACATACTTCAATCATTATGACGATCCCTCCAAACAAGCACAAGC  
TTATCGCCAAATGTCTCTTCTATTACGAAGACCCCCCGGTCTGGAAGCTTATCCAGGAGATGTTTTTATTTGCATTCAC  
GCCTTTTGGAAAGAGCTGCTAAATCAAGTTCCCGTTTTAGGTGAAGGAAGTATGACCGCTTTACCAATAGTTGAGACTCAA  
TCGGGAGACGTTTTCGGCTTATATTTCTACTAATGTAATTTCCATTACAGATGGCCAAATATTCTTATCCGCCGATCTATT  
CAATGCTGGAATCCGACCTGCTATTAATGTGGGTATTTCCGTCTCCAGAGTAGGATCCGCAGCTCAAATCAAAGCCATGA  
AACAAGTAGCTGGCAAATCAAAATTGGAAGTGGCTCAATTCGCAGAGTTAGAAGCCTTTGCACAATTCGCTTCTGATCTC  
GATAAAGCTACTCAGAATCAATTGGCAAGAGGTCAACGATTACGTGAATTGCTCAAACAATCCAATCAGCCCCCTCTCAC  
GGTGAAGAAGCAGATAGTGACTATTTATACCGGAACGAATGGGTATCTTGATTGATTAGAAATTGGACAGGTAAAGAAAT  
TTCTCGTTCAGTTACGTACCTACTTAAAACGAATAAACCTCAGTTCCAAGAAATCATATCTTCTACCAAGACATTCACC  
GAGGAAGCAGAAGCCTTTTGAAAGAAGCTATTCCAGGAACAAATGGAACGCTTTCTA---CTTCAAGAACAAAACA-----  
-----ATGAGAATCAATCCTACTACTTCTGGTCCTGAG-----  
GTTTCCACACTTGAAGAAAAAACCTGGGGCGTATCGCTCAAATCATTGGTCCGGTACTGGATGTAGCTTTTCCCCCAGG  
CAAGATGCCTAATATTTACAACGCTCTAGTAGTTAAGGGTCGAGATACTGTCCGCCAACAAATTAATGTGACTTGTGAGG  
TACAACAATTATTAGGAAATAATCGAGTTAGAGCTGTAGCTATGAGTGCTACAGACGGTCTGACGAGAGGAATGGAAGTG  
ATTGACACGCGAGCTCCTCTAAGTGTTCCAGTCCGGTGGAGCGACTCTCGGACGTATTTTCAACGTTCTTGGAGAGCCTGT  
TGATAATTTAGGTCTGTAGATACTCGCACAAACATCTCCTATTTATAGATCTGCGCCTGCCTTTATACAGTTAGATACCA  
AATTATCTATTTTTGAAACAGGAATTAAGGTAGTGGATCTTTTATAGCTCCTTATCGCCGTGGAGGAAAAATCGGACTATTC  
GGGGGGGCTGGAGTGGGTAAAACAGTACTCATCATGGAATTGATCAACAACATTGCCAAAGCTCATGGGGGTGTATCCGT  
ATTTGGCGGAGTAGGCGAACGTAACGTAAGGAAATGATCTTTACATGGAAATGAAAGAATCTGGAGTGATTAATGAAC  
AAAATATTGCGGAATCAAAAGTGGCTCTAGTATACGGTCAGATGAATGAACCGCCGGGAGCTCGTATGAGAGTTGGTTTTG  
ACTGCCCTAACCATGGCAGAGTATTTCCGGGA

Calycanthus

-----ATGGGAAAA-----TGGTGGTTCAATTCGATC-----  
GAGGGGTTAGAACACAGGTGTGGACTAAGTAAATCAATGGACAGT---CTTGTTAT-CTTATTGGAAATACC-----  
-----AGTGGAAAGTGAAGACCCCACTCTA---AATGATACGAATAAAAACATTCCTAGTTGG---  
GGTCAT-----AGTGGCAGTTATAGTTGC---AATAATGTTGATCATTTTTTTC-----  
AGTGTCCAGGGACATTTGGAGTTTCATCTCTGATGGCACTTTTTTAGTT-----  
AGGGATAATAATGGTAACTGTTATTCCGTATATTTGGATATTGAAAATCAGGTTTTTGAGATTGAC-----  
-----  
-----AAT-----GATAGTTCTTTTCTGAGTGAAGTAGAA-----  
AGTTCTTTTTTCGAGTTATATG-----  
AATTCTAGTTAT---CTG-----AATAGTGGG-----TCTAAGAGTGACAAT---  
CGCTACTATGATCGCTAC-----ACGTATGAT-----ATTAAATATAGTTGGAATAATCACATT-----  
AATAGTTGCATTGATAGTTATCTT-----CGTTCTGAAATAAACATTGAT---  
AGTTACATTTCAAGTGGTAGCGACAATTAC-----CGTGACAGT-----  
-----TACATTTATAGTTACATTTGTAGTGGTGAAAGT---  
GTA---AGTAATAGTAAGAGT-----GGGAGTTCTAGTATAAGAAGT-----  
GGCGGTAAT-----AGCAGTGATTTTC---AATAGAAGAGGAAGATCT-----  
AATGATTTTC-----GATCTAAAT---AAAAAATACAGACATTTATGGGTTCAATGCGAA-----  
AATTGTTATGGATTGAAT-----TATAAAAAATTTGTGAGTTTCAAATGCATATTTGT-----  
GAACAATGTGGATATCATTGAAAATGAGTAGTTTCAGAGAGAATAGAAGTTCGATTGATTCGGGTACTTGGGATCCT--  
-ATG---GAT---GAAGACATGGTCTCTATGGACCCTATT---CAATTTTCAT-----  
-----TCGGAAGAGGAGCCT-----  
-----  
TATAGAGATCGTATCGATTGATCAAAAGAAAGACAGGTTTAACTGAGGCTGTTCAAACGGGCATAGGTCAACTAAATGG  
TATTTCCCGTAGCAATTGGGGTTATGGATTTTCAGTTTATGGGGGGTAGTATGGGATCCGTAGTAGGTGAGAAAATCACCC  
GTTTGTGATCGAGTATGCTACTAATAGATCTCTGCCTGTTATTATGGTGTGTGCTTCTGGAGGAGCGCGCATGCAAGAAGGA  
AGTTTGAGTTTGATGCAAATGGCTAAAATATCTTCCGCTTCATATGATTAT-----  
CAATTAATAAAAAAGTTATTCTATGATCAATCTTACATCTCTCAACCCGGCGGAGTAACCGCCAGTTTTGGTATGTT  
GGGAGATATCATTATTGCTGAACCCAATGCTTACATTTGCGTTTTGCGGGTAAAAGAGTAATTGAACAAACATTGAATAAGA  
CAGTACCCGATGGTTCAACAAGCGCTGAGTATTTCATTCATAAGGGCTTATTTGATCCAATCGTACCACGTAATCCTTTA  
AAAGGTGTTCTGAATGAGTTATTTCCGCTACACGGTTTTCTTCCCTTGAATCAAATCAAGTAGAGCGCTAGGTTCCGT  
TATTTGTAGCGAACTTTAGATGGTAACC-----  
ATTCGAGCCGACGAAATTAGTAATATTATCCGTGAACGTATTGAACAATACAATAGAGAAGTCAAGATTGTGAATACTGG  
CACAGTACTTCAAGTAGGCGACGGCATTGCTCGTATTGATGAGTAAAGTAATGGCAGGGGAATTGGTAGAATTTG  
AAGAGGGTACAATAGGCATTGCTCTTAATTTGGAATCAAATAATGTTGGCGTTGTATTAATGGGCGACGGTTTTGACGATA  
CAAGAGGGAAAGTTCTGTAAGCAACAGGAAGAATTGCTCAGATACCAGTTAGTGAGGCTTATTTAGGTCGTGTTATAAA  
TGCTCTGGCTAAACCTATTGATGGTAGAGGTGAAATTTCCGCTTCGGAATCCCGGTTAATTGAATCTCTGCTCCAGGTA  
TTATTTCCGAGACGTTCCGTATATGAGCCTCTTCAAACGGGACTTATTGCTATTGATTCGATGATCCCTATAGGACGCGGT  
CAGCGAGAATTAATTATTGGGGACAGACAGACCCGGGAAAGCAGCAGTAGCCACAGATACTATTCTCAATCAAAGGGGCA  
AAATGTGGTATGTGTTTATGTGGCTATTGGTCAAAAAGCATCTTCCGTGGCCCAAGTAGTGACCCTTTCCAGGAACGAG  
GGGCAATGGAATACACTATTGTGGTAGCCGAAACGGCGGATTTCGCTGCTACATTACAATACCTTGCTCCTTATACAGGA  
GCGGCTCTGGCTGAATATTTTATGTACCGTGAACGACATACTTCAATAATTTATGATGATCTCTCAAACAAGCACAAGC  
TTATCGTCAAATGTCTCTTCTATTAAGAAGACCCCGGTCGCGAAGCTTATCCAGGAGATGTTTTTTATTTGCATTCAC  
GCCTTTTGGAAAGAGCCGCTAAATTAAGTTCTCCTTTAGGTGAAGGAAGTATGACTGCTTTACCAATAGTTGAGACTCAA  
TCTGGGGACGTTTTCCGCTTATATTCCTACTAATGTTATTTCCATTACAGATGGACAAATATTCTTATCCGCCGATCTATT  
CAATGCCGGAATCCGTCCTGCCATTAATGTGGTATTTCTGTCTCGAGAGTAGGATCCGCGGCTCAAATTAAGCCATGA  
AACAAGTAGCTGGCAAATCAAATTTGAACTGGCCCAATTCGAGAGTTAGAGGCCTTTGCACAATTTGCCTCCGATCTA  
GATAAAGCCACTCAGAATCAATTGGCAAGAGGTCAACGATTACGCGAGTTGCTTAAACAATCCCAAGCAGCCCCCTCTCAC  
CGTGAAGAACAGATAGTTACTATTTATACCGGAGCGAATGGGTATCTTGATCCGTTAGAAAATTGGCCAGGTAAAGAAAT  
TTCTCGTTTACGTTACGTACTTAAAAACAAATAAACCTCAGCTCCAAGAAATCATATCTTCTACCAAGACATTACC  
GAGGAAGTGAAGCCCTTTTGAAGGAAGCTATTCCAGAACAGATAGAAGTCTTTCTA---CTTCAGGAACAAACA-----  
-----ATGAGAATCAATCTACTACTTCTGGTCTGGG-----  
GTTTCCACACTTGAAGAAAAAACCTGGGGCGTATTGCTCAAATCATTGGTCCAGTACTGGATGTAGCTTTTCCCCGGG  
CAAGATGCCTAATATTTACAACGCCTTGGTAGTTAAGGGTCGAGATACTGTCGGTCAACAAATTAATGTGACTTGTGAAG  
TCCAACAATTTAGGAAATAATCGAGTTAGAGCTGTAGCTATGAGTGTACAGATGGTCTGATGAGAGGAATGGAAGTG  
ATTGACACAGGAGCTCCTTAAGCGTTCCCGTCGGTGGAGCTACGCTTGGACGAATTTTCAACGTTCTTGGAGAGCCTGT  
TGATAATTTAGGTCCTGTAGATACTCGACAACATCTCCTATTATAGATCTGCGCCTGCTTTTATCCAGTTAGATACCA

AATTATCAATCTTTGAAACAGGGATTAAAGTGGTGGATCTTTTAGCTCCTTATCGTCGTGGAGGAAAAATCGGACTATTC  
GGAGGAGCCGGGGTGGGTAAAACAGTACTCATCATGGAATTAATCAACAACATTGCCAAGGCTCATGGAGGTGTATCTGT  
ATTTGGCGGAGTAGGCGAACGTACTCGTGAAGGAAATGATCTTTACATGGAAATGAAAGAATCTGGAGTGATTAATGAAC  
AAAATATTGCAGAATCAAAAGTAGCTCTAGTCCATGGCCAGATGAATGAACCGCCGGGAGCTCGTATGAGAGTTGGTTTG  
ACTGCCCTAACCATGGCGGAATATTTCCGGGA

Ceratophyllum

-----ATGGA AAAA-----TGGTGGTTTAATTTGATCTTGTCT-----  
AATGAGGAGTTAGAACACAGATGTAGGCTAAGTAAATCAATGGCCCGT---CCCCGT---CCTATTGGAAATACT-----  
-----AATGGAAGTCAAGATCCCAGTATA---AATGATAGGGATAAAAAAT-----GGG-  
--AGTGAT-----AGTGGCAATTATAGTTTT---AGTAATCTTGATCATTTATTC-----  
GATGTCAAGGATAACTTGAGTTTCATCTATGATGACACTTTTTTAGTT-----  
AGGGATAGTAATGGTGACAGTTATTCTATATATTTTTGATATCGAAAATCTTATTTTTTGAGATTGAT-----  
-----AAT-----GATAGTTTTTTTTCTGAGTAAATTAGAA-----  
AGTTCCTTTTTCGAATTATCTT-----AAT--  
-----AGTGGG-----TCTAAAAATTACAAT---  
CGTTACTATGATAGTTAC-----ATGTATGAT-----ACTAAATACAGTTGGAATAATCACATT-----  
AATAGTTACATTGATAGTTATCTT-----TGTTCCGAAATCCGTATTGAT---  
AGTTACATTTCAAGTGGTATATACAATTAC-----AGTGAGAAT-----  
-----TACATTTATAGTTACGTTTGGAAATGGTGAAAAAT-----  
GTA--AGTACTATTAAGAGT-----AGGAGTTCTAGTATAAGAACT-----  
AGTGCAAAC-----AGCAGCGATATC---AATCTAAAAGGAAGATAT-----  
AATGATTTT-----GATATAAAT---ATCAAATACAGACATTTATGGGTTCAATGTGAT-----  
AATTGTTATGGATTAAT-----TATAAGAAAATTTTTAGTTCAAAAATGAATATTTGT-----  
GAACAGTGTGGATATCATTGAAAATGAGTAGTTTCAGAAAGAATCGAGCTTTCGATTGATTTCGGGTACTTGGGATCCT--  
-ATG---AAT---GAAGATATGGTCTCTACGGACCCTATT---GAATTTTCAT-----  
-----TCAGAAGAGGAACCT-----

TATAGAGATCGTATTGATTCTTATCAAATCAAACTGGTTTAACTGAGGCTGTTCAAACAGGCATAGGTCAACTAAACGG  
TATGCCCATAGCAATTGGGGTTATGGATTTTTAGTTTCATGGGAGGTAGTATGGGATCCGTAGTAGGTGAAAAATAACCC  
GTTTGATTGAGTATGCTACTAATAGATCTCTACCTGTTATTATAGTGTGTGCTTCCGGAGGAGCACGAATGCAAGAAGGA  
AGTTTGAGCTTGATGCAAATGGCTAAAATATCTTCTGCTTTATATAATTAT-----  
CAATTAATAAAAAAGTTATTCTATGTATCAATCCTTACATCTCCTACAACCGGTGGAGTGACGGCCAGTTTTGGTATGTT  
GGGAGATATCATTATTGCTGAACCCAATGCCTACATTGCATTTGCGGGTAAAAGAGTAATTGAACAAACATTGAATAAGA  
CAGTACCCGAAGGTTACAAGCGGCTGAGTATTCATTCCATAAGGGCTTATTTCGATTCAATCGTACCACGTAATCTTTTA  
AAAGGTGCTCTAAGTGAGTTATTGCAGCTCCATGGTTTTCTTTCCGTTGAATCATAATTCTCAAGTAAAGCGCTAG-----  
-----ATGGTAACC-----

ATTCGAGCCGACGAAATTAGTAATATTATCCGCGAACGTATTGAACAATATAATAGAGAAATAAAGATTGTGAATACCGG  
TACCGTACTTCAAGTGGGCGATGGTATTGCTCGTATTGATGGAAGTAATGGCGGGTGAATTAGTAGAATTTG  
AAGAGGGTACAATAGGCATTGCTCTGAATTTGGAATCAAGTAATGTTGGTGTGTATTAATGGGTGATGGTTTGTATGATA  
CAAGAGGGAAGTTCGGTAAAAGCAACGGGACGAATGCTCAGATACCTGTGAGTGAGTCTTATTTGGGGCGTGTATAAA  
TGCTCTGGCTAAACCTATTGATGGGAGGGGTGAAATTTCCGCTTCTGAATCTCGTTAATTGAATCTCCCGCCCCAGGTA  
TTATTTCCAGACGTTCCGTATATGAACCTCTTCAAACAGGACTTATTGCTATTGATTGATGATCCCTATAGGGCGTGGT  
CAGCGAGAATTAATTATTGGGGACAGACAAACCGGTAAAACCGCAGTAGCCACGGATACTATTCTCAATCAAAAAGGACA  
AAATGTAATATGTGTTTATGTAGCTATTGGTCAAAGCATCTTCTGTGGCTCAGGTAGTGACGACTTTCCAAGAACGAG  
GGGCGATGGAGTACACGATTGTGGTAGCAGAAACGGCAGATTCTTCTGCTACATTACAATACCTTGCCCCCTTATACAGGA  
GCAGCTCTGGCTGAATACTTTATGTATCGTGAACGACATACTTTAATAATTTATGATGATCTCTCCAAACAGGCGCAAGC  
TTATCGACAAATGTCTCTTCTATTAAGAAGACCACCGGGCGCAAGCTTATCCCGGAGATGTTTTTTATTTGCAATTCAC  
GCCTTTTAGAAAGAGCTGCTAAATCAAGTTCTCGTTTTAGGTGAAGGAAGTATGACTGCTTTACCAATAGTTGAGACTCAA  
TCTGGGGATGTTTTCGGCTTATATTTCTACTAATGTAATTTCCATTACCGATGGACAAATATTCTTATCCGCGGATCTCTT  
CAATGCTGGAATCCGACCCGCTATTAATGTGGGTATTTCCGTTATCGAGAGTAGGATCCGCAGCTCAAATTAAGCCATGA  
ACAAGTAGCTGGCAAATCAAAATTGGAAGTGGCTCAATTCGCAGAGTTAGAGGCCTTTGCACAATTCGCTTCGGATCTC





GGGCGATGGAATACACCATTGTGGTAGCCGAAATGGCGGATTACCCGCTACATTACAATACCTCGCTCCTTATACAGGA  
GCGGCTCTGGCTGAATATTTTATGTACCGTGAACGACATACTTCAATAATTTATGATGATCCCTCTAAACAGGCACAAGC  
TTATCGTCAAATGTCTCTTCTATTAAGAAGACCCCGGTCGCGAAGCTTATCCAGGAGATGTTTTTTATTTGCATTAC  
GCCTTTTGGAAAGAGCTGCTAAATTAAGTTCTCGTTTAGGGGAAGGAAGTATGACCGCTTTACCAATAGTGGAGACTCAA  
TCTGGGGACGTTTTCGGCTTATATTCCTACTAATGTAATTTCCATTACGGATGGGCAAATATTCTTATCTGCCGATCTATT  
CAATGCGGGAATCCGACCTGCTATTAATGTGGGCATTTCCGTCTCCAGAGTAGGATCCGCAGCTCAAATTAAGCCATGA  
AACAAGTAGCTGGCAAATCAAAATTGGAAGTACTCAATTTCGCAGAGTTAGAAGCCTTTGCACAATTCGCTTCTGATCTC  
GATAAAGCTACTCAGAATCAATTGGCAAGAGGTCAACGATTACGCGAGTTGCTCAAACAATCTCAATCAGCCCCTCTCAC  
GGTGAAGAAGACAGATAGTAACTATTTATACCGGGGCGAATGGGTATCTTGATTTCGTTAGAAAATTGGGCAGGTAAAGAAAT  
TTCTCGTTTCAGTTACGTACCTACTTAAAAACGAATAAACCTCAGTTCCAAGAAATCATATCTTCTACCAGGACATTACC  
GAGCAAGCAGAAGCTCTTTTGAAGAAATTTATCAGGAACAGATAGAACTCTTTCTA---CTTCAGGAACAAACA-----  
-----ATGAGAATCAATCCTACTTCTGGTCTGGG-----

GTTTCCACACTTGAAGAAAAAATCCTGGGGCGTATCGCTCAAATCATTGGTCCGGTACTGGATGTCGCTTTTCCCCCGG  
GAAGATGCCTAATATTTACAACGCTTTGGTAGTTAAGGGTCGAGATACTGTCGGTCAACAAATTAATGTGACTTGTGAGG  
TACAGCAATTATTAGAAATAATCGAGTTAGAGCTGTAGCTATGAGTGCTACAGATGGTCTGATGAGAGGAATGGAAGTG  
ATTGACACGGGAGCTCCCCTAAGTGTTCAGTTGGTGGAGCTACTCTCGGACGAATTTTCAACGTTCTTGGAGAGCCTGT  
TGATAATTTGGGTCTGTAGATACTCGCACAACATCTCCTATTCATAGATCTGCGCCTGCCTTTATACAGTTAGATACAA  
AATTATCTATCTTTGAAACAGGGATTAAAGTGGTGGATCTTTTAGCTCCTTATCGCCGTGGAGGAAAAATCGGACTATTC  
GGGGGAGCTGGAGTGGGTAAAACAGTACTCATCATGGAATTGATCAACAACATTGCCAAAGCTCATGGGGGTGTATCCGT  
ATTTGGAGGAGTAGGCGAACGTACTCGTGAAGGAAATGATCTTTACATGGAAATGAAAGAATCCGGAGTGATTAATGAAG  
AAAACATTGCAGAATCAAAAGTAGCTCTAGTCTATGGTCAGATGAATGAACCGCCGGGAGCTCGTATGAGAGTTGGTTTG  
ACTGCCCTAACCATGGCGGAATATTTCCGCGA

Citrus

-----ATGAAAAA-----

TGGTGGTTCAATTCGATGTTATCTAAGGGTAAGGGGAATTAGAATACAGGTGTTGGTTAAGTAAATCAATGGAGAGC--  
-CCTGGT---CCTATTAATAATCCC-----AGTGTAAGCGAGGAAGTATTAGATA---  
AATGATAAGAATAAAAAACATTCATAGTTTCG---AGCGAT-----AGTGACAGTTCAAGTTAC---AGCAAA-----  
-TTAGCT-----GGTGTGAGGACATTCATAATTTTCATCTCGGATGACACTTTTTTTTGGT-----  
AAGGATAGTAATAGAGATAGTTATTCCATCTATTTTGATATTGAAAATCAAATTTTGGAACTAGAC-----

-----AAT-----GCTCATTCTTTTCTGAGTGAAGTAA-----

AGTTCTTTTTTATAGCTTTTCGT-----  
AATTATAGTTTCG---AGG-----AATAATGGA-----TCTAAAAGCGCTGAT---  
CCTGATTCGGATCGTTAC-----ATGTATGAT-----ACTAAATCGAGTTGGAATAATCACATT-----  
CATAATTGCCTTGACTCTTATCTT-----CATTCTCAAATCTGTATTGAT---  
AGTCACGTTTTAAGTAGTAGTGACAATTAT-----AGTGCCAGT-----

-----TACATTTATAATTTTCAATTTGT---AGTGAAAGT-----  
-----GAGAGTTCCAATATACAAAGT-----

AGCACGAAT-----GGTAGTGATTTA---

ACTATAAGCGAAAGTTCTAATGAAAGCGAAAGTTCTAATGAAAGC-----GATGTAAGT---  
CAAAAATACAGGCATTTATGGGTTCAATGCGAA-----AATTGTTATGGATTAAT-----  
TATAAGAAATTTCTTAAATCAAAAATGTATCTTTGT-----  
GAACAATGCGGATATCATTGAAAGTATTAGCTCAGATAGAATCGACCTTTTGGTTGATCCAGGTAAGTGGGATCCG--  
-ATG---GAT---GACGACATGGTCTCTATAGATCCCATT---GAATTTGAT-----  
-----TCAGAAGAGGAACCT-----

TATAAAAATCGTATTGATTCTTATCAAAGCAAGACAGGATTAACAGAGGCTGTTCAAACAGGTACAGGGCAACTAAACGG  
GATTCCCATCGCAATTGGGGTTATGGATTTTTCAGTTTATGGGGGTAGTATGGGATCCGTAGTAGGCGAGAAAATAACCC  
GTTTGATCGAGTATGCTGCCAATAAATTTTACCTCTTCTTCTAGTGTGTGCTTCTGGGGGAGCACGCATGCAAGAAGGA  
AGTTTGAGTTTGTATGCAAAATGGCTAAAATATCTTCTGCTTTATATGATTAT-----  
CAATCAAATAAAAAGTTATTCTATGTATCAATTCCTTACATCCCCTACTACGGGTGGAGTGACAGCTAGTTTTGGTATGTT  
GGGGGATATCATTATTGCTGAACCTAATGCCTATATTGCATTTGCAGGTAAGAGTAATTGAACAAACATTGAATAAGA

CAGTACCTGAAGGTTCAACAAGAGGCTGAATATTTATTCGATAAAGGGCTTATTCGATCCAATCGTACCACGTAATCCTTTA  
AAAGGTGTTCTGAGCGAGTTATTTCTGTTCCACGGCCGTTTTCTTTGAATCAAAATTAA-----  
-----ATGACAACA-----

ATTAAGCCGACGAAATTAGTAATATTATCCGCGAACGTATTGAGCAATATAATAGAGAAGTAAAGATTGTAAATATTGG  
GACCGTACTTCAAGTAGGCGACGGCATCGCCCGTATTTATGGTCTTGATGAAGTAATGGCAGGTGAATTAGTAGAATTTG  
AAGAGGGTACAATAGGCATTGCTCTGAATTTGGAATCAACTAATGTTGGTGTGTTTTAATGGGTGACGGTTTTAATGATA  
CAAGAAGGAAGTCTGTAAAAGCAACCGGAAAAATTGCTCAGATACCAGTAAGCGAGGCTTATTTAGGTCGTGTTATAAA  
TGCCCTGGCTAAACCTATTGATGGTCGAGGTGAAATTTAGCTTCTGAATCTCGATTAATTGAATCCCCTGCTCCGGGTA  
TTATTTGAGACGTTCCGTATATGAGCCTCTTCAAACAGGACTTATTGCTATTGATTGATCGATGATCCCTATCGGACGCGGT  
CAGCGAGAATTAATTATTGGGGACAGACAGACCCGGTAAAACGGCAGTAGCCACGGATACGATTCTCAACCAACAAGGGCA  
AAATGTAATATGTGTTTTATGTAGCTATTGGTCAAAAAGCATCTTCTGTGGCTCAGGTAGTGAATACTTTCCAGGAGAGGG  
GGCAGATGGACTACACTATTGTGGTAGCCGAAACGGCGGATTTCCCGCTACGTTACAATACTCGCTCCTTATACGGGC  
GCAGCTCTAGCTGAATATTTTATGTACCGTGAACGACACACTTTAATCATTATGATGATCCCTCCAAACAAGCACAGGC  
TTATCGACAAATGTCTCTTCTATTACGAAGACCACCGGGTCGCGAAGCTTATCCCGGAGATGTTTTTTATTTGCATTAC  
GACTTTTGGAAAGAGCCGCGAAATTAGGTTTCGAGTTAGGCGAAGGAAGTATGACCGCTTTACCAATAGTTGAGACCCAG  
TCGGGAGATGTTTTCGGCTTATATTCCTACTAATGTAATTTCCATTACAGACGGGCAAATATTCTTATCCGCGGATTTATT  
CAATGCTGGAATCAGACCCGCTATTAATGTGGGTATTTCCGTCTCTCGAGTAGGATCCGCGAGCTCAAATTAAGCTATGA  
AACAAGTAGCCGGCAAATTAATAATTGGAATTGGCACAATTTCGAGAATTAGAAGCCTTTGCACAATTTGCTTCTGATCTC  
GATAAAGCTACTCAGAACCAATTGGCAAGGGGTCAACGCTTACGTGAGTTGCTCAAACAGGCCCAAGCAGCCCCTCTCAC  
GGTGAAGAACAGATAATGACTATTTATACAGGAACGAATGGTTATCTTGATTATTAGAAATTGGTCAAGTAAGAAAAT  
TTCTCGTTGAGTTACGTACTTACTTAAAAACGAATAAACCTCAGTTCCAAGAAATAATATCTTCTACCAAGATATTCACC  
GAAGAAGCAGAAGCCCTTTTGAAGAAGCTATTGAGGAACAAAAGGAACGTTTTCTA---CTTCAGGAACAATTC-----  
-----ATGAGAATAAATCCTACTACTTCCGGTCTGGG-----

GTTTCCGCGTTTTGCAAACAAAAACCTAGGACATATCGCTCAAATCATTGGTCCGGTACTGGATGTAGCCTTTCCCCCGG  
CAAGATGCCTAATATTTACAATGCTCTGGTAGTTAAGGGTCGAGATACTGTGATCAACCAATTAATGTGACTTGGCAGG  
TACAGCAATTTAGGGAATAATCGAGTTAGAGCTGTAGCCATGAGTGCTACAGATGGTCTAACGAGGGGTATGGAAGTA  
ATTGACACGGGAGCTCCTCTAAGTGTCCAGTCGGCGGAGTGACTCTAGGACGAATTTTCAACGTGCTTGGAGAGCCCGT  
TGATAATTTAGGTCTGTAGATACTCGCACAACTCCCCTATTATAAAATCCGCGCCTGCTTTTATACAGTTAGATACAA  
GATTATCTATTTTTGAAACAGGAATTAAGTAGTAGATCTTTTAGCTCCTTATCGTCGGGGAGGAAAAAATCGGACTATTT  
GGGGGAGTGGGGTGGGTAAAACAGTACTCATTATGGAATTGATCAACAACATTGCCAAAGCCCATGGGGGTGTATCCGT  
ATTTGGCGGAGTCGGTGAACGTACTCGTGAAGGAAATGATCTTTACATGAAATGAAAGAGTCTGGAGTAATTAATGACC  
AAAATCTTTGGAATCAAAAGTGGCTCTAGTCTACGGTCAGATGAATGAACCACCAGGAGCTCGTATGAGAGTTGGTTTG  
ACGGCCCTAATGATGCGGAATATTTCCGAGA

Coffea

ATGACTATTCATCTATTGTATTTTCATGCAAATAGGAGGCAAGAAAAGTCTATGGAAAGA-----  
TGGTGGTTTTAATTCGATGTTGTTT-----AAGAAGGAGTTCGAATGCCGGTGTGGGCTAAATAAATCAACGGAAAGT--  
-CTTGGT---TCTATTGAAAATGCC-----AGTGAAGGTGATGAGCCGGATATA---  
AAAGATAGGACTAAAAACATTCAGAGTTGG---GGGGT-----CGTGACGATTCTAGTTAC---  
AGTAAGGTTGATCATTATTC-----GTCGTTAAAGACATTCGGAATTTTCTCCTCCGATGACACTTTTTTTAGTT--  
----AAGGATAGTAATGGAGACAATTTTTCCATATATTTTGATATTGAAAATCAAATTTTTGAGATTGAC-----

-----AAC-----AATCATTGTTTTCGGAGTGAACATAAA-----AAT--  
-----ACTTATTGG-----  
AATTCTAGTTAT---CTG-----AATAATGGA-----TCTACGAGCGAAGAT---  
ACCTACTATAATCATTAC-----ATGTATGAT-----ACTCAATATAGTTGGAATAATCATATT-----  
AATAGTTGCATTGACAGTTATCTT-----CAGTCTCAAATTTGGATTGAG---  
ACTTCCATTGTAAGTGGAGGGGATAATTAC-----AGCGATAGT-----  
-----TACATCTATAGTTCCATTTGT---GGTGAAAGT---  
AGA---AATAATAGTGAAGGA-----GAGGTTTTCGGATATACAAACC-----  
CACGTGAAG-----GGGAGCGATTTT---ACTATAATAGAAAGTTCT-----  
AATGATCTC-----GATGTAAC---CAAAAATATAGGCATTTGTGGGTTCAATGTGAA-----  
AATTGTTATGGATTAAAT-----TATAAGAAATTTTTGAAATCAAAAATGAATATTTGT-----

GAACAATGTGGATATCATTGAAAATGAATAGTTTCAGAAAGAATCGAACTTTTCGATCGATCCTGGTACTTGGGATCCT--  
-ATG---GAT---GAAGACATGGCCTCTCTGGATCCCATT---GAATTTTCAT-----  
-----TCGGAGGAGGAACCT-----

TATAAAGATCGTATTGATTCTTATCAAAAAGAAGACAGGATTAACCGAGGCTGTTCAAACAGGCATAGGCCAACTAAACGG  
CATTCCCCTAGCAGTTGGGGTTATGGATTTTTAGTTTTATGGGGGGTAGTATGGGATCCGTAGTTGGGGAAAAATAACCC  
GTTTGATTGAATACGCTACCAAAGAGTTGCTACCTCTTATTATAGTATGTGCTTCGGGGGGGCACGCATGCAAGAAGGA  
AGTTTGAGCTTGATGCAAATGGCTAAAATTTTCGTCTGCTTTATATGATTAT-----  
CAATCAAATAAAAAGTTATTTTATGTATCAATCCTTACATCTCCTACTACTGGCGGAGTAACAGCCAGTTTTGGTATGTT  
GGGTGATATCATTATTGCCGAACCCAACGCCTATATTGCATTTGCAGGTAAGAGTAATTGAACAAACATTGAATACAA  
CAGTACCTGAAGGTTCAAGCCGCTGAATATTTTCCAGAAGGGTTTTATTTCGACCTAATCGTACCAGCCTAATCTTTTA  
AAAAGCGTTCTTAGTGAGTTATTTAAGTTCCATGCTTTTCGTTTCTTTGAATCAAATGAAACAGAGCACTAA-----  
-----ATGGTAACC-----

ATTCGAGCTGACGAAATTAGTAATATTATTTCGCGAACGGATTGAACAATATAATAGAGAAGTAAAGATTGTAAATACTGG  
GACCGTGCTTCAAGTAGGCGATGGCATTGCTCGTATTTCATGGTCTTGATGAAGTAATGGCGGGCGAATTAGTTGAATTTG  
AAGAGGGGACAATAGGCATTGCTCTGAATTTGGAATCAAATAATGTTGGTGTGTATTAATGGGTGACGGTTTTGATGATA  
CAAGAAGGAAGTTCTGTAAAAGCAACAGGAAGAATTGCTCAGATACCAGTGAGTGAGGCCTATTTGGGGCGCGTTATAAA  
CGCCCTGGCTAAGCCTATTGATGGTAGGGGTGAAATTTTCAGCTTCTGAATCTCGATTAATTGAATCTCCTGCCCCCGGTA  
TTATTTTCGCGCGTTCCGTATATGAGCCTCTTCAAACCGGGCTTATTGCTATTGATTTCGATGATTCTTATAGGGCGGGGC  
CAGCGAGAATTAATTATTGGGGACAGACAGACCCGGTAAAACAGCAGTAGCCACAGATACGATTCTCAATCAACAAGGTCA  
AAATGTAATATGTGTTTATGTAGCTATTGGTCAAAAAGCTTCTTCTGTGGCTCAGGTAGTAACTACTTTCCAGGAAAGGG  
GAGCGATGGAATATACCATTGTGGTAGCCGAAACGGCGGATTCCCCTGCTACATTACAATATCTCGCTCCTTATACAGGA  
GCAGCTCTCGCTGAATATTTTATGTACCGCGAACGACACACTTCAATTTTTACGATGATCCCTCCAAACAAGCGCAAGC  
TTATCGCCAAATGTCTCTTCTATTACGAAGACCGCCTGGGCGTGAAGCTTATCCGGGGGATGTTTTTTATTTGCACCTCAC  
GCCTTTTGGAAAGAGCCGCTAAATCAAGTTTCAATTTAGGTGAAGGAAGTATGACCGCCCTGCCAATAGTTGAAACTCAA  
TCGGGAGATGTTTTCGGCTTATATTCTACTAATGTAATTTCCATTACTGATGGACAAATTTTCTATCCGCCGATCTATT  
CAATGCTGGAATCAGGCCTGCTATTAATGTGGGTATCTCCGTTTCCAGAGTCGGGTCTGCCGCTCAAATTAAGCCATGA  
AACAAGTAGCTGGTAAATTAAGTTGGAAGTGGCGCAATTTGCAGAATTAGAAGCTTTTGCACAATTTGCCTCTGATCTC  
GATAAAGCTACTCAGAATCAATTGGCAAGAGGTCAACGATTACGTGAATTGCTTAAGCAATCCCAAGCAGCCCCCTCTTGC  
AGTGAAGAACAGATAATGACTATTTATACCAGCAACACCGGCTATCTTGATTATTAGAAATTGGACAGGTAAGGAAAT  
TTCTTGTTGCGTTACGTGCTTATGTAAAACTAATAAACCTCAGTTCCAAGAAATCATTCTTCTACCAAAACATTTACC  
GAGGAAGCGGAATCCCTTTTGAAGAAGCTATTCAGGAGCAAATGGACCGTTTTTTA---CTTCAGGAACAAGCA-----  
-----ATGAAAATAAATCCTACTACTTCTGGTTCTGGG-----

GTTTCCACGCTTGAAAAAAAAAAATGAGGGCGTATTGTCCAAATCATCGGCCCGGTAAGTACTAGATGTAGCCTTTCCGGCGGG  
CAAGATGCCGAATATTTATAACGCCCTAGTAGTTAAAGGTTCAGATACTGTTGGTCAACCAATTAATGTAACCTTGTGAGG  
TACAGCAATATTAGGAAATAATCGCGTTAGAGCTGTAGCTATGAGTTCTACAGATGGTCTAACGAGAGGAATGGAAGTG  
ATTGACACGGGAGCTCCTCTAAGTGTTCGGGTAGGAGGAGCAACTCTGGGACGAATTTTCAACGTGCTTGGAGAACCCGT  
TGATAATTTAGGTGCTGTAGATACTCGTACAACATCTCCTATTTCATAGATCTGCGCCCGCTTTTATACAGTTAGATACAA  
AATTATCTATTTTTGAAACGGGAATTAAGTAGTAGATCTTTTAGCCCTTATCGCCGTGGAGGAAAAATAGGACTCTTC  
GGGGGAGCTGGAGTAGGTAACAGTACTCATTATGGAATTGATTAACAATATTGCCAAAGCCCATGGAGGCGTATCCGT  
ATTTGGCGGAGTGGGTGAACGTAACGTAACGTAACGTAACGTAACGTAACGTAACGTAACGTAACGTAACGTAACGTAACG  
AAAATATTGCAGAATCAAAGTGGCTCTAGTTTACGGTCAGATGAATGAACCGCCGGGAGCTCGTATGAGAGTTGGTTTTG  
ACTGCCCTAACTATGGCGGAATATTTCCGAGA

Cucumis

-----ATGGAAAA-----AGATGGTTAAATTCGATGTTGTCT-----  
AAAGGGGAGTTAGAATACAGGTGTAGGCTAAGTAAATCAATCAATAGT---CTTGGT---CCTATTGAA-----  
-----AGTGAAGGATCAATTATA---AATAATATGAATAAAAAACATTCCTAGTCAT-  
--AGTGAT-----AGTTACAATTCTAGTTAC---AGTACTGTTGATGATTTAGTC-----  
GGCATTCGAAATTTTCGTATCTGATGACACTTTTTTAGTT-----  
AGGGATAGTAATAGCAGCAGTTATTCCATATATTTGGATATTGAAAATCAAATTTTTGAGATTGAC-----  
-----AAT-----GATCCTTCTTTTGTAAAGTGAAGTAGAA-----

AGTTCTTTTTATAGTTTTTCGG-----  
AACTCTACTTAT---CAA-----AATAATATA-----TCTAAGAATGATGAT---  
TCCCCTACTATGATCGTTAC-----ATGTATGAT-----ACTAAATATAGTTGGAATAATCACATT-----  
AATAGTTGCATTGACAGTTATCTT-----CGGACTCAAATCTGTATTGAT---  
AGTTACATTTTAAAGTGGTAGTCACAATTAC-----AGTGACAGT-----  
-----TACATTTATAGTTATATTTGT---GGCGAAGGT---  
GGA---AATAGTAGTGAAAGT-----GAGAGTTTCAGTATAAGAAGT-----  
AGCACGCAT-----GGAAATAATTTA---ACTATAACAGAAAAGTTCT-----  
AATGATCTAGATAATGATCGAACT---ACAAACTACAGCGATTTTTGGGTTATATGCGAA-----  
AATTGTCATAAATTCAAT-----TATAAGAGACTTTTCAAATCAAAAATGAATATTTGT-----  
GAAGAATGTGGATAACCATTTGAAAATGAATAGTTTCCAGATAGAATCGAACTTTTGATTGATCCAGGTACTTGGGACGCTCT  
-ATG--GTAT-GTACAGACATGGTCTCTGTGGATCCCATAT--GAATGGGAT-----  
-----

TCCGAGGTGGATCCCATTCAATGGAAGTCGCAGGTGGATCCCATTGAAGGGGATTCCGAGGTGGATCTCATTGAAGGGGA  
TTCGAGGAGTACAAGGACTCTTCTTATAAAGATCGTATTTCTTCTTCTCAAATAGAGACAGGATTACCTGAGGCTATTC  
AAACAGGCACAGGTAAATTAATGGTATTCCTCGTAGCAATTGGGGTTATGGAGTTTGAATTTATGGGGGGTAGTATGGGA  
TCTGTAGTAGGCGAGAAAATCACCCGTTTGTATCGACTATGCTAGCAATCAATTTTTACCTCTTATTTTAGTGTGTGCTTC  
GGGAGGAGCACGCATGCAAGAAGGAAGTTGAGCTTGATGCAAATGGCAAAAATATCTTCTGCTTTATATGATTATAAAT  
ATCAATCAAATAAAAAATTATTCTATGTAGCAATCCTTACATCTCCTACTACTGGTGGGGTGACAGCTAGTTTTGCTATG  
TTGGGGGATATCATTATTGCCGAACCGAATGCCTACATCGCATTTGCGGGTAAAAGAATAATTGAAGAAACATTGAAGAT  
GGAAGTCCCTGAGGGTTACAGAAGACTGAACCTTTATTGAAAAGGGCTTATTAGATCTAATCGTACCACGTAATCCTT  
TAAAAGATGTTGTGAGTGAGTTATTTTCCAGCTCCACGCTTTTCTTCCCTCGAATCAAAATTCATCAAGTAA-----  
-----ATGGTAACC-----

ATTAGAGCCGACGAAATTAGTAATATTATCCGTTGAAACGATTTGAGCAATATAATAGAGAAGTAAAGATTGTAAATACCGG  
TACCGTACTGCAAGTAGGCGACGGCATTGCTCGTATTTATGGTCTTGATGAAGTAATGGCGGGTGAATTAGTAGAATTTG  
AAGAGGGTACAATAGGGATTGCTCTGAATTTGGAATCAAATAATGTTGGTGTGTATTAATGGGTGACGGTTTTGATGATA  
CAAGAGGGGAAGTTCTGTAAAAGCAACAGGAAGAATTGCTCAGATACCGGTGAGTGAGGCTTATTTGGGTCTGTGTATAAA  
TGCCCTGGCCAAAACCTATTGATGGTTCGAGGTGAAATTTACGCTTCTGAATTCGATTAATTGAATCTCCTGCTCCAGGTA  
TTATTTTCGAGACGTTCCGTTATATGAGCCTCTTCAAACCTGGACTTATTGCTATTGATTTCGATCCCTATAGGACGTGGT  
CAGCGAGAATTAATTATTGGGGACAGACAGACCCGGTAAAACAGCAGTAGCCACGGATACTATTCTCAATCAACAAGGTCA  
AAATGTAATATGTGTTTATGTAGCTATTGGTCAAAGAGCATCTTCTGTGGCTCAGGTAGTGAATACTCTCCAGGAAAGGG  
GAGCTATGGAATACACTATTGTGGTAGCTGAAACCGGCGGATTCCCCAGCTACGTTACAATACCTCGCTCCTTATACAGGA  
GCAGCTCTTGTGTAATATTTTATGTTTTCGTGAACGACACACTTTAATCATTATGATGATCTCTCCAAACAAGCACAGGC  
TTATCGCCAAATGTCTCTTCTATTACGAAGACCACCCGGTTCGCGAAGCTTATCCAGGAGATGTTTTTTATTTGCATTAC  
GCCTTTTAGAAAGAGCCGCTAAATTAAGTTCTCTTTTGGTGAAGGAAGTATGACTGCCTTACCAATAGTGGAGACCCAG  
TCGGGAGATGTTTTCGGCTTATATTTCTACTAATGTAATTTCCATTACAGATGGACAAATATTCTTATCAGCCGATCTATT  
CAATGCTGGAATCAGACCTGCTATTAATGTGGGTATTTCTGTTTCCAGAGTAGGATCTGCAGCTCAAATTAAGCCATGA  
ACAAGTAGCTGGAAAATTAATAATTGGAATTAGCGCAATTCGCAGAATTAGAAGCCTTTGCACAATTCGCTTCTGATCTC  
GATAAAGCTACCCAGAATCAATTGGCAAGAGGTCAACGATTACGTGAATTGCTTAAACAATCCAAGCAGCCCTCTCAC  
GGTGAAGAACAGATAATGACTATTTATACGGGAACGAATGGTTATCTTGATTATTAGAAATTGGACAGGTAAGGAAAT  
TTCTCGTTGAGTTACGTAATTACGTAATAAACGAATAAACCTCAATTTCAAGAAATTATATCTTCTACTAAAACATTTACT  
GAGGAAGCAGAAGCCCTTTTAAAAGAAGCTATCCAGGAACAGAAGGAACGCTTTCTA---CTTCAGGAACAAGGA-----  
-----ATGAGAATCAATCCTACTACTTCGGGTCTGGA-----

GTTTCCACACTTGAAAAAAAACCTGGGACGTATCTCTCAAATCATTGGTCCGGTACTCGATGTAGCCTTTCCCCGGG  
CAAGATGCCTAATATTTATAACGCTCTGGTAGTTAAAGGTGAGATACTATCGGTCAAGAAATTAATGTGACTTGTGAGG  
TACAGCAATTTAGGAAATAATCGAGTTAGAGCTGTAGCTATGAGTGTACAGATGGTCTAATGAGAGGAATGGAAGTG  
ATTGACACAGGAGCTCCTCTAAGTGTTCAGTCCGGCGGAGCGACTCTCGGCCGAATTTTCAACGTGCTTGGAGAACCCTGT  
TGATGATTTAGGACCTGTAGATACTCGTACAACATCTCCTATTATAGATCTGCGCCCGCCTTTATCCAGTTAGATACAA  
AATTATCTATTTTTGAAAACAGGAATTAAGTAGTAGATCTTTTAGCCCTTATCGGCGTGGAGGAAAAATAGGACTATTC  
GGGGGGGCTGGAGTGGGTAAAACAGTACTCATTATGGAATTGATCAACAACATTGCTAAAGCTCATGGGGGGGTATCCGT  
ATTTGGAGGAGTAGGTGAACGTAACGTAACGTAAGGAAATGATCTTTACATGGAAATGAAAGAATCTGGAGTAATTAATGAAC  
AAAATATTGCAGAATCTAAGGTGCTCTAGTCTACGGTCCAGATGAATGAACCCCCCGGAGCTCGTATGAGAGTTGGTTTTG  
ACTGCCCTAACTATGGCGGAATATTTCCGAGA

Daucus

-----  
-----  
-----

-----  
-----  
-----ATGGAAAGA-----TGGTGGTTCGATTCAATACTGTTT-----  
AAGAAAGGGTTCGAACACAGGTGTGGTCTAAGTAAATCAATGGGCGGT---CTTGGT---CCTATTGAAAATACC-----  
-----AGTGAAAGTGAAGATCCGAATAGA---AATGATATGAAAAAATAGCCATAGTTGG-  
--GGCAGT-----CGTGACAATTCTAGTTAC---AGCAATGTTGATTATTTATTC-----  
GGCGTCAAGGACATTTGGAATTTCTCTCTGATGAAACTTTTTTAGTT-----  
GTGGATAGGAATGGGAACAGTTATTCCATATATTTGGATATTGAAAAGCATATTTTCGAGATTGAT-----  
-----

-----AGT-----GGTCATTTTTTTCAGAGTGGACTAGAA-----  
AGTTCTTTTTTATAGTTATTGG-----  
AATTTGAGTTAT---CTA-----AATAATGGA-----TCTAAGACTGACGAT---  
CCTCACGATGATCATTAC-----ATGGATGAT-----ACTCAATATAGTTGGAATAATCACATT-----  
AATAGTTATATTGACATTTATCTT-----GAGTCTCAAATCTTTATTGAT---  
ACTTACATTGTAAGTGGTAGTGACAATTAC-----AGTAACAGT-----  
-----TACATTTCTCGTTCCGTTTGT---GGTGAAAGT---  
GAA---AGT-----AAGGGTCCAATATAAGTACC-----  
AGCACGAAT-----GGTAGC-----ACTATAATAGAAAGTTCC-----  
AATGATCTG-----GATATAACT---CAAAAATACAGACATTTATGGGTTCAATGTGAA-----  
AATTGTTATGGATTAAT-----TATAAGAAAATTTTAAAATCAAAAATGAATCTTTGT-----  
GAACAATGTGGATATCATTGAAAATGAGTAGTTCAGATAGAATCGAACTTTTCGATCGATCCGGATACTTGGGATGCT--  
-ATG---GAT---GAAGACATGGTTTCTTTGGATCCCATT---GAATTTTCA-----  
-----TCGGAAGAGGAGCCT-----  
-----

TATAAAGATCGTATCGATTCTTATCAACGAAAGACAGGATTAACGGAAGCCGTTCAAACAGGCATAGGCCAATTAATGG  
TATTCCCATAGCACTTGGGGTTATGGATTTTCAGTTTATGGGGGTAGTATGGGATCCGTGGTGGAGAGAAAATAACCC  
GTTTGATTGAGTACGCTACTAACCAATTGCTCCCTCTTATTATAGTATGTGCTTCTGGGGGGCGCGTATGCAAGAGGGA  
AGTTTGAGTTTAAATGCAAATGGCTAAAATATCTTCTGCTTTATATGATTAT-----  
CAATCAAATAAAAAGTTTATTTATGTACCAATTTACATCTCCTACTACAGGGGGGTGACTGCTAGTTTTGGTATGTT  
GGGAGATATCATTATTGCCGAACCCAACGCCTATATGCAATTTGCGGGTAAAAGAGTAATTGAACAAACATTGAATAAAA  
CAGTACCTGAAGGTTACAGGCGGCTGAATATTTATTCCAGAAGGGCTTATTTCGATCTAATCGTACCACGTAATCTTTTA  
AAAAGCGTTCTGAGTGAGTTATTTTCCAGCTCCACGCTTTCTTTTCTTTGAATAAAAATTCATAGAGCATTAA-----  
-----ATGGTAACA-----

ATTCGAGCCGACGAAATTAGTAAGATTATCCGTGAGCGTATTGAGGAATATAATAGAGAAGTAAAGATTGTAAATACCGG  
TACCGTACTGCAAGTAGGTGACGGCATTGCTCGTATTCATGGTCTTGATGAAGTAATGGCGGGTGAATTAGTAGAATTTT  
AAGAGGGTACAGTAGGCATTGCTCTGAATTTGGAATCAACAAATGTCGGTGTGTATTAATGGGTGATGGTTTGTGATA  
CAAGAAGGAAGTCTGTAAAAGCAACAGGAAGAATTGCTCAGATACCTGTGAGTGAGGCCTATTTGGGTCGTGTTGTAAA  
TGCCCTGGCTAAACCTATTGATGGTAGGGGTGAAATTTTCCAGCTTCTGAATATCGGTTAATTGAATCTCCTGCTCCGGGTA  
TTATTTTACGACGTTCCGTATACGAGCCTCTTCAAACGGGGCTTATTGCTATTGATTTCGATGATACCTATAGGGCGTGGC  
CAGCGAGAATTAATTATTGGGGACAGACAAACAGGTAAAACAGCAGTAGCAACAGATACGATTCTGAACCAACAAGGCCA  
AAATGTAATATGTGTTTATGTAGCTATTGGTCAAAAAGCATCTTCTGTGGCTCAGGTAGTGACTAATTTCCAGGAAAGGG  
GAGCGATGGAATACACTATTGTGGTAGCTGAAACGGCGGATTCTCCTGCTACATTACAATATCTCGCTCCTTATACAGGC  
GCTGCTCTGGCGGAATTTTTTATGTACCGCAAACGACACACTTTAATAATTTATGATGATCCCTCTAAACAGGCACAAGC  
TTATCGACAAATGTCTCTTCTATTACGAAGACCGCCTGGTCGCGAAGCTTATCCAGGGGATGTTTTTTATTTACATTCAC  
GCCTTTTGGAAAGAGCTGCTAAATTAGGTTCTCTTTTAGGTGAAGGAAGTATGACTGCTTTGCCAATAGTTGAAACTCAA  
TCGGGAGATGTTTTCGGCTTATATTTCTACTAATGTAATTTTCGATTACTGATGGACAAATATTTCTTATCTGCCGATCTATT  
CAATGCTGGAATCAGACCTGCTATTAATGTGGGTATCTCCGTTTCTAGAGTGGGATCTGCAGCTCAAATTAAGCTATGA  
AACAAGTTGCTGGCAAATTAATAATTGAACTGGCGCAATTCGAGAATTAGAAGCCTTTGCACAATTTGCTTCTGATCTT  
GATAAAGCTACTCAGAATCAATTGGCAAGAGGTCAACGATTACGTGAATTGCTTAAACAATCCCAATCCGCCCTCTTGC  
GGTAGAAGAACAGATAATGACTATTTATACCGGAACAAATGGTTATCTTGATTATTAGAAATTTGGACAGGTAAGGAAAT  
TTCTTGTTGAGTTACGTACTTACCTAAAAACAAATAAACCGCAGTTTCAAGAAATAATATCTTCTACCAAGATATTCACC  
GAGGAAGCAGAAGCCCTTTTGAAGAAGCTATTCCAGGAACAGATGGAACGTTTTATA---CTTCAGGAACAAGTA-----  
-----ATGAAAATAAATCCTACTAATTCTAGTTCCGTTG-----

ACTTCCACGCTTGAATAAATAAATCCTCGGGAATATCACCCAAATCATTGGTCCGGTACTAGATGTAGCTTTTCCACCGGG  
CAAGATGCCTAATATTTATAACGCTCTGGTAGTTAAGGGTCGAGATACTGCTGGTCAACAAATTAATGTGACTTGTGAGG  
TACAGCAATTAAGGAAACAATCGAGTTAGGGCTGTGGCTATGAGTGCTACAGATGGTCTAACGAGAGGAATGGAAGTA  
ATGGATACGGGAGCTCCTCTAAGTGTTCCGGTCCGTGGAACGACTCTTGACGAATTTTCAACGTAATTTGGAGAGCCCGT



TTCTCGTTTCAGTTACGTACTTACTTAAAAAGAATAAATCTCAATTCAAAGAAATTATATCTTCTACCAAGACATTTACT  
GAAGAAGCAGAAGCCCTTTTGAAGGGAGCTGTTTCAGGAACAAATTGAGCTCTTTCTA---CTTCAAGAACAACA-----  
-----ATGAGAATCAATCCTACTACTTCTGGTCCTATG-----  
ATTTCCACACTTGAAGAAAAAACTTAGGACGTATCGTTCAAATTATTGGCCCAGTACTGGATGCCCTTTTTCCCCCAGG  
AAAGATGCCTAATATTTATAACGCTTTGGTAGTTAAAGGTCGA-----  
GCCGGTCAACAAATTAATGTGACTTGTGAGGTACAACAATTATTAGGAAATAATCGAGTTAGAGCTGTAGCTATGAGTGC  
TACAGATGGTCTGATGAGAGGAATGGAAGTGATTGACACGGGAGCTCCTCTAAGTGTTCCAGTTGGCGGAGCTACTCTCG  
GACGAATTTTCAACGTTCTTGGAGAACCTGTTGATAATTTAGGGCCTGTAGATACTCGCACAAACATCTCCTATTTCATAGA  
TCTGCGCCTGCCTTTATACAGTTAGATACGAAATTATCAATCTTTGAAACAGGGATTAAGTGGTGGATCTTTTAGCTCC  
TTATCGTCTGGGGGAAAAATCGGGCTATTTGGGGGAGCTGGGGTGGGTAACAGTCCTCATCATGGAATTGATCAACA  
ACATTGCCAAAGCTCATGGGGGTGTGTCTGTATTTGGCGGAGTAGGCGAACGTACTCGTGAAGGAAATGATCTTTACATC  
GAAATGAAAGAATCTGGAGTGATTAATGAAAAAATATTGCAGAATCAAAGTGGCTCTAGTCTATGGTCAAATGAATGA  
ACCACCGGAGCTCGTATGAGAGTTGGTTTGACTGCCCTAACCATGGCGGAATATTTCCGGGA

Drimys

-----ATGGAAAA-----TGGTGGTTCAATTCGATGTTGTCT-----  
AACGAGGAGTTAGAACACAGGTGTGGGTTAAGTAAATCAATGAACAGT---CTTGGTCTGTGCTATTGGAAATACC-----  
-----AGTGAAGTGAAGACCTCATTATA---AACGATACGGATAAAAAACATTCATAGTTGG-  
--AGTGAT-----AGTGGCAGTTATAGTTGC---AATAATGTTGATGATTTATTT-----  
GGTATCAGGGACATTTGGAGTTTCGTCTCTGATGACACTTTTTTAGTT-----  
AGGGATAGTAATGGTGACAGTTATTCCGTCTATTTTGATATTGAAATCAGATTTTTTCAGATTGAC-----  
-----AAT-----GATAGTTCTTTTCTGAGTGAAGTAGAA-----  
AGCTCTTTTTCTAATTATCTG-----  
AATTTTAGTTAT---CTG-----AATAGTGGG-----TCTAAGAGTGACAAT---  
CGCTATTATGATCGTTAC-----ATGTATGAT-----ATTAAATATAGTTGGAATAATCACATT-----  
AATAGTTGCATTGATAGTTATCTC-----CATTCTGAAATCAGTATTGAG---  
AGTTATATTTCAAGTAGTAGCGACAATTAC-----GGTGACAGT-----  
-----TACATTTCTAGTTTCATTTGT---AATGAAAGT---  
GTA---AGTGTTAGTGACAAT-----GGGAGTTCAAGTATAAGAAGT-----  
AGCGGTAAT-----GGCAGCGATTTT---AATATAAGAGGAAGATCT-----  
AATGATTTT---GATATCAAT---CAAAAATACAGACATTTGTGGGTTCAATGCGAA-----  
AATTGTTATGGATTAAT-----TATAAGAAATTTTTTAGGTCAAAAATGAATATTTGT-----  
GAACAGTGTGGATATCATTGAAAATGAGTAGTTTCAGATAGAATCGAACTTTTCGATTGATCCGGGCCTTGGGATCCT--  
-ATG---GAT---GAAGACATGGTCTCTATCGACCCCAT---GAATTTAC-----  
-----TCGGAGGAGGAACCT-----

TATAGAGATCGTATCGATTCTTATCAAAGAAAGACAGGTTTAACTGAGGCTGTTCAAACAGGCATAGGTCAACTAAATGG  
TATTTCCATAGCAATTGGGGTTATGGATTTTCAGTTTCATGGGGGTAGTATGGGATCCGTAGTAGGCGAGAAAATAACCC  
GTTTGATCGAGTATGCTACTAATGGATCTCTACCTATTATTATGGTGTGTGCTTCTGGAGGAGCACGCATGCAAGAAGGA  
AGTTTGAGCTTGATGCAATGGCGAAAATATCTTCTGCTTCATATAAATTAT-----  
CAATCAAATAAAAAGTTATTCTATGTATCAATCCTTACATCTCCTACAACCGGTGGAGTGACAGCCAGTTTTGGTATGTT  
GGGAGATATCATTATTGCTGAGCCCAATGCCTACATTTGCATTTGCGGGTAAAAGAGTAATTGAACAAACATTGAATAAGA  
CAGTACCCGACGGTTACAAGCGGCTGAGTATTCAATCCATAAGGGCTTATTTCGATTCAATCGTACCACGTAATCCTTTA  
AAAGGTGTTCTGAGTGAATTTTTCAGCTACATGGTTTCTTTCTTTGAATCAAATAA-----  
-----ATGGTAACC-----  
CTTCGAGTGCAGCAAATTAGTAATATTATCCGTGAACGTATTGAACAATATAATAGAGAAGTCACGATTGTGAATACCGG  
CACCCTACTTCAAGTAGGCGACGGTATTGCTCGTATTTCATGGTCTTGATCAAGTAATGGCAGGGGAATTAGTAGAATTTG  
AAGAGGGTACCGTAGGCATTGCTCTGAATTTGGAATCAAATAATGTTGGTGTGTATTAATGGGTGACGGTTTTGATGATA  
CAAGAGGGAAGTTCTGTAAGCAACAGGAAGAATTGCTCAGATACCCGTGAGTGAGGCTTATTTGGGTCGTGTTATAAA  
TGCTCTGGCTAAACCTATTGATGGGAGAGGTGAAATTTAGCTTCTGAATCTCGGTTAATTGAATCTCCCGCTCCGGGTA  
TTATTTTCGAGACGTTCCGTATATGAGCCTCTTCAAACGGGACTTATTGCTATTGATTTCGATGATCCCTATAGGACGCGGT  
CAGCGGAATTAATTATTGGGGACAGACAGACCGGGAAAACAGCAGTAGCCACAGATACTATTCTCAATCAAAGGGCA



AAATGTAATATGTCTTTATGTAGCTATTGGTCAAAAAGCATCTTCCGTGGCTCAGGTAGTGACTACTTTCCAAGAACGAG  
GGGCGATGGAATACACTATTGTGGTAGCCGAAACAGCGGATTTCGCTGCAACATTACAATACCTCGCGCCTTATACAGGA  
GCGGCTCTGGCTGAATATTTTATGTACCGTGAACGACATACTTCAATAATTTATGACGATCTCTCAAACAAGCACAAGC  
TTATCGCCAAATGTCTCTTCTATTAAGAAGACCACCCGGTCGCGAAGCTTATCCAGGAGATGTTTTTTATTTGCATTAC  
GCCTTTTGGAAAGAGCCGCTAAATCAAGTTCTCATTAGGTGAAGGAAGTATGACCGCTTTACCCATAGTTGAGACTCAA  
TCTGGGGACGTTTTCGGCTTATATTCCTACTAATGTGATTTCCATTACAGATGGACAGATATTCTTATCTTCCGATCTATT  
CAATGCTGGAATCCGCCCTGCTATTAATGTGGGTATTTCCGTCTCCAGAGTAGGATCTGCAGCTCAAATTAAGCCATGA  
AACAGGTAGCTGGTAAATCAAAATTGGAAGTGGCTCAATTTCGAGAGTTAGAAGCCTTTGCACAATTCGCTTCTGATCTC  
GATAAAGCCACTCAGAATCAATTGGCAAGAGGTCAACGATTACGCGAGTTGCTCAAACAATCTCAATCAGCCCCTCTCAC  
GGTGAAGAACAATACTTACTATTTATACTGGGGCGAATGGGTATCTTGATCCGTTAGATATTGGACAGGTAAAGAAAT  
TTCTCGTTACGTTACGTAACCCACTTAAAAACAATAAACCTCAGTTCCAAGAAATCATATCTTCTACCAAGACATTACC  
GAGCAAGCAGAAGCCCTTTTGAAGGAAGCTATTCGGAACAGATGGAAGTGTATA---CTTCAGGAACAAACA-----  
-----ATGAGAATCAATCCTACTACCTCTGGTCCTGGG-----  
GTTTCCACACTTGAAGAAAAAACCTGGGGCGTATTGCTCAAATCATTGGTCCGGTACTGGATGTAGTTTTTCCCCCGGG  
CAAGATGCCTAATATTTACAACGCTTTGGTGGTTAAGGGTCGAGATACTGTCGGTCAACAAATTAATGTGACTTGTGAGG  
TACAGCAATTATTAGGAAATAATCGAGTTAGAGCTGTAGCTATGAGTGCTACAGATGGTCTGATGAGAGGAATGGAAGTG  
ATTGACACGGGAGCCCCTCTAAGTGTTCAGTTCGGTGGGGCTACACTCGGACGAATTTTCAATGTTCTTGGAGAACCTGT  
TGATAATTTAGGTCTGTAGATACTCGCACAACTCTCCTATTCATAGGTCTGCGCCTGCTTTTATCCAGTTAGATACAA  
GATTATCCATCTTTGAAACAGGGATTAAGTGGTGGATCTTTTAGCTCCTTATCGCCGTGGAGGAAAAATCGGACTATTC  
GGAGGAGCTGGAGTGGGTAAAACAGTACTCATCATGGAATTGATCAACAACATTGCCAAAGCTCATGGAGGTGTATCTGT  
ATTTGGCGGAGTAGGCGAACGTAAGTGAAGGAAATGATCTTTACATGGAATGAAAGAATCCGGAGTTATTAATGAAG  
AAAATATTGCAGAATCAAAAGTAGCTCTAGTCCATGGTCAGATGAATGAACCGCCGGGAGCTCGTATGAGAGTTGGTTTA  
ACTGCCCTAACCATGGCGGAATATTTCCGGGA

Eucalyptus

-----ATGGA-----TGGTGGTTCAATTCGATGTTGTAT-----  
AAAGGAAAATTAGAATACAGGTGTGGGCTAAGTAAATCAATTGATAGG---TTTGGTAATCCTATTGAAAAAAC-----  
-----AGTGTAAGTGAAGATCCGGTTAGA---AACGATACGGATAAAAAGATTTCATAGTTGG-  
--AGTGAA-----AGTTCTAGT-----TAC---AGTAATGCTACGCATTTTCGTG-----  
GGCGTCAGGGACGTTTCGTAATTTTATCTCTGATGACACCTTTTTAGTT-----  
CGAGATAGTAATAGGAATATTTTATCCATATATTTTATGATATTACTAATCAAATTTTTGAGATTGAC-----  
-----AAT-----GATCCTTCTTTACTGAGTGAACGAGAA-----  
AGCTCTTTTTTTAGTTATCGG-----  
ACTTATGCTTAT---CTG-----AAGAATGGA-----TCTAAGAATGATGAT---  
CCGCCCTGTGATCGTTCC-----ATGTATGAT-----ACTAAATACAGTTGGAATAATCACATT-----  
ACTAGTTGCATTAACCTTTATCTT-----GGTTCTCAAATCTGTATTGAG---  
AGTTCCATTTTAAGTAGTAGTGACAATTCC-----AGTGACAGT-----  
-----TACATTTCTAGTTACATTTAT---GGTGAAAGT---  
AGA---AATAGTAATGAAAGG-----GGGAGCTCCAGTATAAGAAGT-----  
AGCAGGAAT-----GGTATTGATTTCC---ACTCGAAGAGAAAAATTCT-----  
ACTGATTTCC-----GATTTGACT---CAAAAATATAGGCATTTGTGGGTTCAATGCGAA-----  
AATTGTTATGGATTAAT-----TATAAGAAACTTTTGAAGTCCAAAATGAATATTTGT-----  
GACCAATGTGGATATCATTGAAAATGAGTAGTTTCAGATCGAATCGAACTTTTCGATTGATCCAGGTACTTGGGATCCT--  
-ATG---GAT---GAAGACATGGTTTCTCTGGATCCTATT---GAATTTTCAT-----  
-----TCGGAGGAGGAACCT-----

TATAAAGATCGTATTGATTCTTATCAAAGAAAGACAGGATTAACCGATGCTGTTCAAACAGGCACAGGTGACTAAACGG  
TATTCCCATAGCAATTGGAGTTATGGATTTTTCAGTTTATGGGGGTAGTATGGGATCCGTAGTAGGCGAGAAAATCACCC  
GTTTGATCGAGTATGCTACCAATCAATTTTACCTCTGATTCTAGTGTGTGCTTCCGGAGGAGCACGTATGCAAGAAGGA  
AGCTTGAGCTTGATGCAAAATGGCTAAAATATCTGCTGCTTTATATGATTAT-----  
CAATCCCATAAAAAGTTATTCTATGTATCAATCCTTACATCTCCTACTACTGGTGGGGTAACGGCTAGTTTTGGGATGTT  
GGGGGATATTATTATGCCGAACCTAATGCTTACATTGCATTTCGAGGTAAGAGTAATTGAACAAACATTGAATAAGA



-----ATGGTAACT-----  
ATTCGACCCGACGAAATTAGTAGTATTATCCGCAAACAGATTGAGCAATATAATCAAGAGGTAGAGGTTGCTAATATTGG  
TACCGTACTTTCGAGTAGGAGATGGCATTGCTCGTATCCATGGTCTTGATGAAGTAATGGCAGGTGAATTAGTGGAAATTTG  
TAGATGGTACAGTAGGCATTGCTCCAAATCTAGAATCGAACGATGTTGGAGTTGTATTAATGGGTGATGGCTTGATGATA  
CAAGAAGGCAGTTCGGTAAGGGCAACGGGAAAAATTGCTCAGATACCAGTAAGTGATGCTTATTTGGGCCGTGTTGTAAA  
TGCTCTAGCCCAACCTATTGATGGCAGAGGTCAAATTTTCAGCTTCCGAATCTCGACTGATTGAATCTTCTGCTCCAGGTA  
TTATTTTGGAGACGTTCCGTATATGAACCTCTTCAAACGGGGCTTATTGCTATTGATTCTATGATCCCTATAGGGCGCGGT  
CAGCGAGAATTAATTATTGGGGACAGGCAGACCCGTTAAAACAGCAGTAGCTACAGATACTATTATCAACCAAAAAGGTCA  
AGATGTAATATGTGTTTTATGTAGCTATTGGCCAAAAAGCCTCTTCCGTGGCTCAGGTAGTTAATACTTCCCAAGAACGTG  
GCGCAATGGAATACACCATCGTGGTGGCAGAACTGCAGATTCCCCCGCTACATTACAATATCTCGCTCCTTATACAGGG  
GCGGCTTTGGCCGAATACTTCATGTACCAGGAACAACATACTCCAATAATTTATGATGATCCCTCAAACAGGCGCGAGC  
TTATAGACAAATGTCTCTTCTATTAAGAAGACCACCTGGTCGGGAAGCTTATCCGGGAGATGTTTTCTACTTGCATTCCC  
GTCTTCTGGAAAGAGCAGCTAAATTAAGTTCTCAGTTAGGTGAAGGGAGTATGACTGCTTTACCAATAGTTGAAACTCAA  
GCTGGGGATGTTTTCGGCTTATATTCCGACCAATGTAATTTCCATTACCGATGGACAAATCTTCTTATCGGCTGATCTATT  
CAATGCCGGGATCCAACCTGCCATTGATGTGGGTATTTCTGTATCTAGAGTAGGATCCGCAGCTCAGATTAAGCTATGA  
AACAAGTAGCTGGAAAATTAATAATTGGAGTTAGCTCAATTTGCAGAGTTAGAAGCCTTCGCGCAATTCGCTTCTGATCTT  
GATAAAGCTACTCAAAATCAATTGGCAAGAGGTCAACGATTACGTGAGTTGCTCAAACAGTCTCAATCAGCTCCTTTGAC  
AGTGGAGGAACAAATAGCTACTATTTATACTGGAGCGAATGGATATCTAGATATATCAGAGATCGTACAGGTGAGAAAAT  
TTCTCGTTTCAGTTACGCGAATATTTAATAACTAATAAACCCGAGTTCCGGAGAAATTTATACGTTCTACTAGGACATTCCT  
GAACAAGCAGAAGCCCTTTTGAAGAGGCTATTAAGGAACATATCGAAATTTTTTTTG--ACTTCGAGAAC--  
AGAAGAGAATATT--ATGAGAACCAATCTTATTGCT-----CTTGGA-----  
GTTTCCACACTTGTGGAAAAGAATGTGGGACGTATTGCTCAAATCATTGGCCCCGTTACTGGATGTAACTTTTCCCCGGG  
CAATATGCCTAATATTTTCAATTCTTTGATAGTGAAGGGTCAAGATACAGCTGGTCAGGAAATTCATGTTACTTGTGAGG  
TACAACAATTATTAGGAAATAATAGAGTTAGAGCTGTAGCTATGAATGCTACAGATGGTCTGATGAGAGGAATGAAAGTG  
ATTGACACAGGAGCTCCTCTGAGTGTTCAGTTGGTGGAGCTACTCTTGGACGAATTTTCAATGTTCTTGGAGAACCTGT  
CGATAATTTAGGTCCTGTAGATGCTCGCACAAACATCCCCTATTATAGACCTGCTCCTGCCTTTACGCAGTTGGATACCA  
AATTATCAATCTTCGAAACAGGCATTAAGTGGTGGATCTTTTAGCTCCTTATCGACGTGGAGGAAAGATCGGACTATTC  
GGGGGAGCTGGAGTGGGTAAAACAGTACTCATCATGGAGTTAATCAACAACATTGCTAAGGCTCATGGAGGTGTATCTGT  
ATTTGGCGGAGTAGGGGAACGTACTCGTGAAGGGAATGATCTTTACGTGGAAATGAAAGAATCAGGAGTAATTAATGAGC  
AAAACATCTCAGAATCAAAGTAGCTCTGGTCTATGGTCAGATGAATGAACCACCAGGAGCTCGTATGAGAGTTGGTTTA  
ACTGCCTTAACCATGGCTGAATATTTCCCGAGA

Glycine

-----ATGGAAAA-----TGGTGGTTTAATTCTATGTTGTTT-----  
AATAGGAAGTTAGAATACAGGTGTGAATTAAGTAAATCAATGGATAGT---CTTGGT---CCTATTGAAAATACC-----  
-----AGTCTAAGGGGAAGACCCTAAAATTTTAACCGATATAGAAAAAAAATTCAC-----  
-----AGGGATTTGGATTATTTAGAAATGGAA-----  
-----GGTTTTTTTTCTAGCGATCTG-----  
-----AATACTGTT-----  
--TCTAAGAATGATGAT-----GATCATTAC-----ATGTATGAG-----  
ACTCAATTTAGTTTTAACAATAATATT-----ACTAGTTTCATTGATAGT-----

TGCATTGAG---AGTTTCAATTTAGGTGATATTGACAAATAC-----AATGATATT-----  
-----TATTTTTATAGTTACATTTTT---  
TTGAAGGGC---AGA---AATTGTAGTGAAAGCGATAAT-----  
TCTAGTACTAGTATAATAACT-----AGTACGAATGATACAAAT-----GATAGTGATTCC---  
ACTATAGGAGAAAGTTCT-----AATAATCTC-----GATGAAAGT---  
CAAAAATATAAGCATTGTGGCTTGAATGCGAA-----AATTGTTATGGATTAAT-----  
TATAAAAAATTTTTAAATCAAAAATGAATATTTGT-----  
GAATACTGTGGATATCATTGAAAATGGGCAGTTCAGATAGAATCGAACTTTTCGATTGATTCCGGTACTTGGAAATCCT--  
-ATG---GAT---GAAGACATGGTTTCTCTGGATCCTATT---GAATTTTCAT-----  
-----TCCGAAGAGGAACCT-----

TATAAAGATCGTATTGATTCTTATCAAAGAAAAACGGGATTAAGTGGGCTGTTCAAACAGGTAAGTCAACTAAATGG  
TATTCCTGTAGCTATTGGAATTATGGATTTTTAGTTTTATGGGGGGCAGTATGGGATCCGCAGTAGGTGAGAAAATCACCC  
GTTTGGTAGAATATGCTACTAATCAACTTTTACCTCTTATTCTGGTATGTGCGTCCGGAGGAGCGCGTATGCAAGAAGGA  
AGTTTGGAGCTTGATCCAAATGGCTAAAATCTCTTCTGCTTTATATGATTAT-----  
CAAAAAAATAAAAAGTTATTCTATGTATCCATACTTACATCTCCCACTACTGGGGGGGTAAGTCTAGTTTTGGCATGTT  
GGGGGATATCATTATTGCCGAACCAATGCTTATATTGCATTTGCTGGTAAAAGAGTAATTGAACAAACATTGAATAAGG  
CAGTACCTGAAGGTTACAAGCAGCTGAATATTTTCCATAAGGGCTTATTTGATTCAATCGTACCGCGTAATCTTTTA  
AAGGGCGTTCTGAGTGAGTTATTTCAATTCATAATTTCTTTTCTTTGACTAAAAATGATAAGGCATAG-----  
-----ATGGTAACC-----

ATTCGTGCAGATGAAATTAGTAAAATTATCCGTGAACGCATTGAGCAATATAATACGGAAGTAAAAATTGTAAATACGGG  
TACCGTACTTCAAGTAGGCGACGGTATTGCTCGTATTTATGGTCTTGATGAAGTAATGGCGGGTGAATTAGTGGAATTTG  
AAGAGGGTACTATAGGCATTGCTTTGAATTTGGAATCCAAAAATGTTGGTGTGTTGATTAATGGGTGATGGTTTTGATGATA  
CAAGAGGGAAAGTTCAGTAAAAGCAACAGGAAGAATTGCTCAGATACCTGTAAGTGAGGCTTATTTGGGTGCTGTTATAAA  
TGCCCTGGCTAAACCAATTGATGGTTCGAGGAGAAATTTAGCTTCCGAATCTCGATTAATCGAATCTCCTGCTCCCGGTA  
TTATTTTCGAGACGTTCCGTATATGAGCCTCTCCAAACAGGACTTATTGCTATTGATTGATGATCCCCATAGGACGTGGC  
CAACGAGAATTAATTATTGGAGACAGACAAACGGGTAAAACAGCAGTAGCCACAGATACTATTCTCAATCAACAGGGACA  
AAATGTAATATGTGTTTATGTAGCTATTGGTCAAAAAGCATTCTCTGTGGCTCAAGTGGTGAATACCTTACAAGAAAGAG  
GAGCAATGGAATACACTATTGTAGTAGCTGAAACAGCGGATTTCCAGTACATTACAATACCTCGCCCCCTTATACAGGA  
GCAGCTCTGGCTGAATATTTTATGTACCGTGAACGTCACACTTTAATCATTATGACGATCTCTCCAACAAGCACAGGC  
TTATCGCCAAATGTCTCTTCTATTACGAAGACCACCTGGTTCGCGAAGCTTATCCAGGGGATGTTTTTTTATTACATTCAC  
GTCTTTTGGAAAGAGCCGCTAAATTAAGTTCTCAGTTAGGCGAAGGAAGTATGACTGCTTTACCAATAGTTGAAACTCAA  
TCGGGAGATGTTTCAGCTTATATTCCTACTAATGTAATTTCCATTACAGATGGCCAAATATTCTTATCTGCCGATCTATT  
CAATGCTGGAATCAGACCCGCTATTAATGTAGGTATTTCCGTTTCCAGAGTTGGATCGGCGGCTCAAATTAAGCCATGA  
AACAAGTAGCTGGTAAATTAATAATTGGAATTAGCACAATTGCGAGAATTAGAAGCTTTTGCCCAATTCTCTTCTGATCTC  
GATAAAGCTACTCAAAATCAATTAGCAAGAGGTCAACGATTGCGCGAGTTGCTTAAACAATCCCAATCAGCTCCTCTTAC  
CGTGAAGAACAGATAATAACTATTTATACTGGAACGAATGGTTATCTTGATTGATTAGAAATTGGACAGGTAAGGAAAT  
TTCTTGTTGAGTTACGTGCTTACTTAAACACGAATAAACCTCAATTCAAAGAAATCATATCTTCTACCAAGACATTCCT  
GGGGAAGCAGAAGTCTTTTTGAAGGAAGCTATTCAAGAACAGATGGAACCTTTTTTA---

CTACAGGAACAGGTAGAAAAA---AATATGCGAATCAATCCTACTACTTCTGGTCTGAG-----  
GTTTCTGCGCTTGAAAAAATAATCTGGGACGTATCGCCAAATAATTGGTCCGGTACTAGATGTAGCTTTTCCCCCAGG  
TAAGATGCCTAATATTTACAACGCTCTGATAGTTAAGGGTCGAGATACTGTTGGTCAACAAATTAATGTGACTTGTGAAG  
TACAGCAATTATTAGGAAATAATCGAATTAGAGCTGTAGCTATGAGTGCACAGAAGGTCTAATGAGAGGAATGGAAGTG  
ATTGACACAGGAGCTGCCCTAAGTGTCCAGTAGGTGGAGCAACTCTAGGACGAATTTTCAACGTGCTTGGAGAGCCCAT  
TGATAATTTAGGTCTGTAGATACTCGCACAACATCTCCCATTCATAGATCTGCGCCTGCCTTTATACAATTAGATACAA  
AATTAGCCATTTTTGAAACAGGAATAAAAAGTAGTAGACTTTTAGCTCCTTATCGTCTGGAGGAAAAATAGGACTTTTC  
GGTGGAGCTGGAGTGGGTAAAACGGTACTGATTATGGAATTGATCAATAACATTGCCAAAGCTCATGGAGGTGTATCTGT  
ATTTGGCGGAGTAGGTGAACGTAAGTACTCGTGAGGGAAATGATCTTTATATGGAATGAAAGAATCTGGAGTAATTAATGAAC  
AAAATATTGCAGAATCAAAAGTAGCTCTAGTATATGGTCAAATGAATGAACCGCCCGGAGCTCGTATGAGAGTTGGTTTA  
ACTGCCCTGACTATGGCGGAATATTTTCGAGA

Gossypium

-----ATGGAAAA-----TCATGGTTCAATTTGATCTTGTCT-----

AAGGGAGAATTAGAATACAGATGTGGGCTAAGTAAATCAATGGATAGC-CGCTTGGT---CCTGTTGAAAATACT-----  
-----ACTGTAAACGAAGACCCGACTCGA---AATGATACGGATAAAAAACATTCATGATTGT-  
-----AGTGACAGCTCTAGTTATTACAGTAAGGTTGATCATTAGTT-----  
GACGTCAAAGACATTCGGAATTTTCAATTTCTGATGACACCTTTTTAATT-----  
AGGGATAGTAATCAGGACCGTTATTCCATATATTTTTGATAGTGAAAATCAAATTTTTGAGCTTAAC-----  
-----AAT-----GATCATTCTTTTTTGGAGTGAAGTAACTAGAA-----  
AGTTTTTTTTTATAGTTATCAT-----  
AATTCTAGTTAT---ATG-----AATAATGGA-----TCGAAAAATGATGAG---  
CCCCACTATCATTTTAAC-----TTGTATGATAATGATACTAACTGTGGTTGGAATAATCACATT-----  
AATAGTTGTATTGACTCTTATCTT-----CGTTCTCAAATCTGTATTGAT---  
AGTTCATTTTAAGTGGTAGTGACAATTCC-----AATGATAAT-----  
-----TATATTTCTAATTACATTTGC---GGCGAAGGT---  
GGA---AATAGTAGTGAAGGC-----AAGAATTTTCGATATAATAACT-----  
CGTGAATAAT-----GGTAATGATTTA---ACTCTAAAAGAAAGTTCT-----  
AATGATCTC-----GATCTA-----  
TACAAGGATTTGTGGGTTCAATGCGAATGCGAAAATTGTTATGGAGTAAAT-----  
TATAAGAAATCGCTTAATTCAAAAATGAATATTTGT-----  
GAACAATGTGGATATCATTGAAAATGAGGAGTTTCAGATAGAATCGAACTTTTCGATTGATCCAGGCACCTTGGGGTCT--  
-ATG---GAT---GAAGACATGATCTCTCTGGATCCCATT---GAATTTTCAG-----  
-----TCTGAAGAAGAGCTT-----  
-----  
TATAAAGATCGTATTGATTTTTATCAAAGAAAGACAGGATTAACCTGAGGCTATTCAAACAGGCACGGGTCAACTAAACGG  
TATTCCTATAGCAATCGGGGTTATGGATTTTCAGTTTATGGGGGGGAGTATGGGATCCGTTAGTAGGCGAGAAAATCACCC  
GTTTGATCGAATATGCTACCAATAATTTTTTACCTCTTATTCTAGTGTGTGCTTCCGGAGGAGCACGCATGCAAGAAGGA  
AGTTTGAGCTTGATGCAAATGGCTAAAATATCTTCCGCTTTATATGATTAT-----  
CAATCAAATAAAAAGTTATTTTATGTATCAATTCCTACATCTCCTACTACTGGTGGAGTACTGCGAGTTTTGGTATGTT  
GGGGGATATCATTATTGCTGAACCCAATGCCTATATTGCATTTGCGGGTAAAAGAGTAATTGAGCAAACATTGAATAAAA  
CAATACCGGAAGGTTTCACAGGCGGCTGAATATTTTCCATAAGGGTTTTATTTCGATCCAATCGTACCACGTAATCCTTTA  
AAAGGTGTTCTGAGTGAGTTAGTTTCAGCTCCACGGTTTTTCCCTTTGAATCAAATTCATCAAGTAG-----  
-----ATGGTAACT-----  
ATTAGAGCCGACGAAATTAGTAATATTATCCGTGAACGTATTGAGCAATATAATAGAGAAGTAAAGATTGTAAATACTGG  
TACCGTCTTCAAGTGGGCGACGGCATTGCTCGTATTGATGAGTAAATGGCAGGTGAATTAGTAGAATTTG  
AAGAGGGTACCATAGGCATTGCCCTCAATTTGGAATCAAATAATGTTGGTGTGTTGATTAATGGGTGACGGTTTTGATGATA  
CAAGAGGGAAAGTTCTGTAAAAGCAACAGGAAAAATTTGCTCAGATACCAGTGAGTGAGGCTTATTTGGGTGCTGTTATAAA  
TGCCCTGGCTAAGCCTATTGACGGTTCGGGGTGAATTTTCAGCTTCTGAATCTCGGTTAATTGAATCTCCTGCCCCAGGTA  
TTATTTTCGAGACGTTCCGTTTATGAGCCTCTTCAAACAGGACTTATTGCTATTGATTTCGATGATCCCTATAGGACGTGGT  
CAGCGAGAATTAATTATTGGGGATAGACAGACCGGTAAAACAGCAGTAGCCACGGATACGATTCTCAATCAGCAAGGGCA  
AAATGTAATATGTGTTTATGTAGCTATTGGTCAAAAAGCATCTTCTGTGGCTCAGGTAGTGACCACCTTTCCAAGAAAGGG  
GAGCGATGGAGTACACCATTGTGGTAGCCGAAACGGCGGATTCCCCAGCTACATTACAATACCTCGCTCCTTATACAGGA  
GCTGCTTTGGCTGAATATTTTATGTATCGTGAACGACACACCTTAATCATTATGATGATCTTTCCAAGCAAGCACAGGC  
TTATCGCCAAATGTCTCTTCTATTACGAAGACCGCCGGGTGCTGAAGCTTATCCAGGAGATGTTTTTTATTTGCAATTCGC  
GCCTTTTAGAAAAGAGCCGCTAAATCAAGTTCTCAGTTAGGTGAAGGAAGTATGACTGCTTTACCAATAGTTGAGACCCAG  
TCGGGAGACGTTTCGGCGTATATTCTACTAATGTGATTTCCATTACAGATGGACAAATATTCTTATCCGCCGATCTATT  
CAATGCTGGAATCAGACCTGCTATTAATGTGGGGATTTCCGTCTCCAGAGTAGGATCGGGCGGCTCAAATTAAGCTATGA  
AACAAGTCTGCTGGTAAATCAAATTTGGAATTTGGCCCAATTCGCCGAATTAGAAGCCTTTGCACAATTTGCTTCTGATCTC  
GATAAAGCTACTCAGAATCAATTTGGCACGAGGTCAACGATTACGTGAGTTGCTTAAACAATCCCAATCAGCTCCTCTTAC  
GGTGGCAGAACAGATAAGTACTATTTATACCAGCAAGTGGTATCTTGTATTGATTGATAAATTTGACAAGTAAGGAAAT  
TTCTCGTTGAGTTACGTACTTACTTAAAAACGAATAAACCTCAGTTCCAAGAAATCATATCTTCTACCAAGACATTCCT  
GAGGAAGCGGAAACGCTTTTGAAGACGCTATTTCAGGACCAATGGAACGTTTTTCGA---CTTCAGGAACAATTA-----  
-----ATGAAAATAAATCCTACTACTTCTGTTTCTGGA-----  
GTTTCCACGCTTGAAAAGAAAATCTGGGGCGTATTTCTCAAATCATCGGTCCAGTACTGGATGTAGCCTTTCCCCCGGG  
CAAGATGCCTAATATTTACAACGCCCTAGTAGTTAAGGGTCAAGATACCGCCGGTCAACAAATTAATGTAACCTTGTGAGG  
TACAGCAATTATTAGGAAATAATCGAGTTAGAGCTGTAGCTATGAGCGCTACAGATGGTCTAACGAGAGGAATGGAAGTG  
ATTGACACGGGAGCTGCTCTAAGTGTTCAGTTCGGCGGAGCGACCCTAGGACGAATTTTTAACGTGCTTGGGGAGCCCGT  
TGATAATTTAGGTCCTGTAGATACTCGCACAAATCCCTATTTCATAAATCCGCGCCCGCTTTTCATACAATTAGATACAA  
AATTATCTATTTTTGAAACAGGAATTAAGTAGTCGATCTTTTAGCTCCTTATCGTCTGGAGGAAAAATCGGACTATTT

GGGGGGGCTGGGGTAGGTAAAACAGTACTCATTATGGAATTGATCAACAACATTGCCAAAGCTCATGGGGGCGTATCCGT  
ATTTGGCGGAGTAGGTGAACGGACTCGTGAAGGAAATGATCTTTACATGGAAATGAAAGAATCTGGAGTAATTAATGAAC  
AAAATCTTGCAGGAATCAAAAGTGGCTTTAGTCTACGGTCAGATGAATGAACCGCCAGGAGCTCGTATGAGAGTTGGATTG  
ACTGCCCTAACTATGGCGGAATATTTCCGAGA

Helianthus

-----ATGAAAAGA-----TGGTGGTTAAATTTCGATGTTATTT-----  
AAGAAGGAGTTCGAACACAGATGTAGGCTAAGTAAATCAACGAGCAGT---CTTGGT---CCTATTGAAAATGCC-----  
-----AGCGAAAGTAAAGATCCGAATATA---AATGATACGGATAAAAAACATTCAGAGTTGG-  
--GGTGGT-----CATGACAAT-----TAC---AGTAATGTTGATCTTTTTTTTT-----  
GGCGTCAAAGACCTTCGGAATTTAATCTCTGATGATACTTTTTTTAGTT-----  
AAAGATAGTAATGGGGACATTTATTCTTTATATTTTGGATATTGAAAATCATATTTTTTGAGATTGAC-----

-----AAT-----GATCATCCT-----GAACTAGAA-----  
AGTTCTTTT-----TATCGG-----  
AATTCTAGTTAT---CTG-----AATAATGGA-----TCTAAGAGTAAGAAT---  
CCCGAACACGATCCTTAC-----ATGAATGAT-----ACTCAGTATACTTGGAAATAATCACATT-----  
AATAGTTGCATTGACAGTTATCTT-----CAGTCTCAAATCTGTATTGAT---  
AGTTACATTGTAAGTGGTAGTGACAATTCC-----AGTAATAAT-----  
-----TACATTTCTAGTTCCATTTGT---GGTGAAAGT---

GGA---AATAGTAGTAAAAACGAGGAT-----  
-GCCAGA-----ACGAGTGATCCA---ATTATACGAGAAAGTTCT-----  
ACTGATCTG-----GATGTAAC---CAAAAATACAGGCATTTGTGGGTTCAATGCGAA-----  
AATTGTTATGGATTAAT-----TATAAGAAATTTTTTAAATCAAAAATGAATCTTTGT-----  
GAACAATGTGGATATCATTGAAAATGAGTAGTTTCAGATAGAATCGAACTTTTCGATCGATCCGGGTACTTGGGAGCCT--  
-ATG---GAT---GAAGACATGGTCTCTCTGGATCCCATT---GAATTTTCAT-----  
-----TCGGAGGAGGAGCCT-----

TATAAAAATCGTATCGATTCTTATCAAAGAAAGACAGGATTAACCGAGGCTGTTCAAACAGGCATAGGGCAACTAGACGG  
TATTAACGTAGCAATTGCGGTTATGGATTTTTCAGTTTATGGGGGTAGTATGGGATCCGTCGTCGGGGAGAAAATTACCC  
GTTTAATTGAATACGCTACTAAAGAATTTCTACCTCTTATTATAGTGTGTGCTTCCGGAGGGGCACGCATGCAAGAAGGA  
AGTTTGAGCTTGATGCAAATGGCTAAAATATCTTCTGCTTTATATGATTAT-----  
CAATCAAATAAAAAGTTATTCTATGTACCAATCCTTACATCTCCTACTACCGGTGGGGTGACAGCTAGTTTTGGTATGTT  
GGGGGATATCATTATTGCTGAACCCAATGCCTACATTGCCTTTGCGGGTAAAAGAGTAATTGAACAAACACTGAATAAAA  
CAGTACCCGACGGTTCACAAGCGGCTGAGTATTTTCCAGAAGGGCTTATTCGATCTAATCGTACCACGTAATCCTTTA  
AAAAGCGTTCGAGCGAGTTATTTCAACTCCACACTTTCTTTCTTTGAATCAAAAATTAA-----  
-----ATGGTAACC-----

ATTCAGCCGACGAAATTAGTAATATTATCCGTGAACGTATTGAGCAATATAATAGAGAAGTAAAGATTGTAAATACCGG  
TACCGTACTTCAAGTAGGTGATGGCATTGCTCGTATTGATGGTCTTGATGAAGTAATGGCGGGTGAATTAGTAGAATTT  
AAGAGGGTACAATAGGCATTGCTCTTAATTTGGAATCAACTAATGTTGGTGTGTTAATGGGTGATGGTTTTGCTGATA  
CAAGAAGGGAGTCTGTAAAAGCAACAGGAAAAATGCTCAGATACCAGTGAGTGAGGCCTATTTGGGTGCTGTTATAAA  
CGCCCTGGCTAAACCTATTGATGGTAGAGGTGAAATTTTATCTTCTGAATATAGATTAATTGAATCGCCCGCTCCGGGGA  
TTATTTCTCGACGTTCTGTATATGAGCCTCTTCAAACAGGGCTTATTGCTATTGATTCAATGATTCCCATAGGACGTGGT  
CAGCGAGAATTAATTATTGGGGACAGACAGACCGGTAAAACAGCAGTAGCAACAGATAACAATCTAAATCAACAAGGCCA  
AAATGTAATATGCGTTTATGTAGCTATTGGTCAAAGCATCTTCTGTGGCTCAGGTAGTGACTACTTTCCAGGAAAAGG  
GCGCGATGGAATATACTATTGTGGTAGCCGAAACGGCGGATTCCCCTGCTACATTACAATACCTCGCTCCTTATACAGGA  
GCAGCTCTGGCTGAATATTTTATGTACCGTGAACGACACACTTTAATCATTTATGATGATCTCTCTAAACAAGCGCAAGC  
TTATCGCCAAATGTCTCTTCTATTACGAAGACCACCTGGGCGCGAGGCTTATCCAGGGGATGTTTTTTATTTACATTCAC  
GCCTTTTGGAAAGAGCTGCTAAATTAAGTTCTCTTTTAGGTGAAGGAAGTATGACCGCTTTACCAATAGTTGAAACCCAA  
TCGGGAGACGTTTCGGCTTATATTCTACGAATGTAATTTCAATTACTGATGGACAAATATTCTTATCTGCCGATCTCTT  
CAATGCTGGAATCCGACCCGCTATTAATGTGGGTATCTCTGTTTCCAGAGTGGGGTCTGCAGCTCAAATTAAGCTATGA  
ACAAGTAGCCGGTAAATTAATAACTGGAGCTGGCACAATTTCGAGAATTAGAAGCTTTTGCACAATTTGCTTCTGATCTC  
GATAAAGCTACTCAGAATCAATTAGCAAGAGGTCAACGATTACGTGAATTGCTTAAACAATCCCAATCCGCCCTCTCGC







AAGAAGGTACAATAGGTATTGCTTTAAATTTGGAATCAACTAATGTTGGTGTGTGATTAATGGGGGATGGTTTGTATGATA  
GAAGAAGGAAGTTCTGTAAAAGCAACAGGAAGAATTGCTCAGATACCAGTGAGCGAGGCCTATTTGGGTCGTGTTTTAAA  
TGCCCTGGCTAAACCTATTGATGGTAGAGGTGAAATTTTCAGCTTCGGAATCTCGATTAATTGAATCTCCTGCTCCAGGTA  
TTATTTTCGCGGCGTTCTGTATATGAGCCTCTTCAAACCGGGCTTGTGCTATTGATTTCGATGATTCCATAGGACGTGGT  
CAGCGAGAATTAATTATTGGGGACAGACAGACCGGTAAAACAGCAGTAGCCACCGATAACGATTCTCAATCAACAAGGTCA  
AAATGTAATATGTGTTTATGTAGCTATTGGTCAAAAAGCATCTTCTGTGGCTCAGGTAGTAACTACTTTACAGGAAGGGG  
GGGCGATGGAATACACTATTGTGGTAGCCGAAATGGCGGATTCCCCCGCTACATTACAATACCTTGCTCCTTATACAGGA  
GCAGCTTTGGCTGAATATTTTATGTACCGTAAACAACACACTTTAATCATTTATGATGATCTCTCCAAACAAGCCCAAGC  
TTATCGCCAAATGTCTCTTCTATTACGAAGACCGCCTGGTCGTGAAGCTTATCCAGGGGATGTTTTTTTATTTGCATTAC  
GCCTTTTGAAAAGAGCCGCTAAATCAAATCTAGTTTAGTGAAGGAAATGACCGCCTTACCAATAGTCGAAACTCAA  
TCGGGAGATGTTTTCGGCTTATATTTCTACTAATGTAATTTCCATTACTGATGGACAAATATTCTTATCCGCCGATCTATT  
CAATGCTGGAATCAGACCTGCAATTAATGTGGGTATCTCCGTTTCCAGAGTAGGGTCTGCAGCTCAAACGAAAGCCATGA  
AACAGTAGCTGGTAAATTTAAATTTGAACTGGCGCAATTCACAGAATTAGAAGCCTTTGCACAATTTGCTTCGGATCTT  
GATAAAGCTACTCAGAGTCAATTGGCAAGAGGTCGACGATTACGTGAATTGCTTAAACAATCCCAATCAGCTCCTCTCAC  
GGTGGGAGAACAGATAATGACTGTTTATACCGGAACAAAAGGTTATCTTGATTATTAGAAAATTGGACAGGTAAGCAAAT  
TTCTTGATGCTTTACGTACTCACTTAAAACTAATAAACCTCAGTTCCAAGAAATCATATCTTCTACTAAGACATTTACC  
GAGGAAGCAGAAGTCCTTTTGAAAGAAGCTATTCAGGAACAAATGGAACGCTTCTTA---CTTCAGTAA-----  
-----ATGAGAATGAATCCTACTACTTCTGGTTCTGGG-----  
GTTTCCACGCTTGAAAAAAAAAACCTGGGGCGTATCGTCCAATCATCGGGCCGGTCCCTAGATGTATCCTTTCCGTCGGG  
CAAAATGCCTAATATTTATAATGCTCTGGTAGTTCAAGGCCGAGATACTGTTGGTCAAGCAATTAATGTGACTTGTGAGG  
TACAGCAATTATTAGGAAATAATCGAGTTAGAGCTGTAGCCATGAGTGCTACAGATGGTCTGATGAGAGGAATGGAAGTG  
ATTGACACAGGAGCTCCTTAAGTGTTCGGTTCGGTGGAGCGACTCTGGGACGAATTTTCAACGTGCTTGGAGAGCCTGT  
TGATGAATTAGGTCCTGTAGATACTCGTACAACATCTCCTATTTCATAGATCTGCGCCTGCCTTTATACAGTTAGATACAA  
AATTATCTATTTTTGAAACAGGAATTAAGTAGTAGATCTTTTAGCCCTTATCGCCGTGGGGGAAAAATAGGACTATTT  
GGAGGAGCTGGAGTTGGTAAAACGGTACTCATTATGGAATTGATTAACAATATTGCCAAAGCCCATGGGGGCGTATCCGT  
ATTTGGCGGAGTGGGTGAACGTACTCGTGAAGGAAATGATCTTTACATGGAAATGAAAGAATCTGGAGTGATTAATGAAG  
AAAATATTGCAGAATCAAAGTGGCTCTAGTTTACGGTCAGATGAATGAACCGCCTGGAGCTCGTATGAGAGTTGGTTTG  
ACTGCCCTAACGATGGCGGAATATTTCCGAGA

Lactuca

ATGATTTTTCGTGAATGACTATTCATCTATTGTATTTTTCATGCAAATATGGAGCAAGAAAACCTCTATGAAAAGA-----  
-TGGTGGTTCAATTCGATGTTATTT-----AAGAAGGAGTTCGAACACAGATGTAGGCTAAGTAAATCAATGGGCAGT-  
--CTTGGT---CCTATTGAAAATGCC-----AGTGAAAGTAAAGATCCGAATAGA---  
AATGATACGGATAAAAACATTCAGGGTTGG---GGTGGT-----CATGACAAT-----TAC---  
AGTAATGTTGATCTTTTTTTTT-----GGCGTCAAGGACATTCGGAATTTTTTCTCTGATGATACTTTTTTTAGTG--  
----AAAGATAGTAATGGGGACAGTTATTCTATATATTTTTGATATTGAAAATCATATTTTTTGAGATTGCC-----  
-----AAT-----GATCATCCTTTTTGTAGTGAAGTAGAA-----  
AGTTCTTTT-----TATCGG-----  
AATTCTAGTGAT---CTG-----AATAATGGA-----TCTAAGAGTAAGAAT---  
CCCACCACGATCGTTAC-----ATGGATGAT-----ACTCAGTATACTTGGAAATAATCACATT-----  
AATAGTTGCATTGACAGTTATCTT-----CAGTACCAAATCTGTATTGAT---  
AATTACATTGTAAGTGGTAATGACAATTCC-----  
AGTAACAATAAATCCAGTAACGAGAATTCAGTAACGAGAATTCAGTAACGAGAATTCAGTAACGAGAATTCAGTAA  
CGATTACATTTCTAGTTCCATTTCT---AGTCAAAGT---GAA---AATAGTAGTCAAACGAGGAT-----  
-----ATACA-----ACGAGTGATCAA---  
ACTATACCAGAAAGTTCT-----ACTCATATG-----GGTGTAAGT---  
CAACAATACCGGCATTTGTGGGTTCAATGCGAA-----AATTGTTATGGATTAAAT-----  
TATAAGAAATTTTTTAAATCAAAGATGCATCTTTGT-----  
GAACAATGTGGATATCATTTGAAAATGAGTAGTTCCAGATAGAATCGAACTTTTGATCGATCCGGGCCTTGGGAGCCT--  
-ATG---GAT---GAAGACATGGTCTCTCTGGATCCCATT---GAATTTCAT-----  
-----TCGGAGGAGGAGCCT-----

TATAAAAATCGTATCGATTCTTATCAAAGAAATACAGGATTAACCGAGGCTGTTCAAACAGGCAGAGGGCAACTAAACGG  
TATTACCGTAGCAATTGGGGTTATGGATTTTCAGTTTTATGGGAGGTAGTATGGGATCCGTAGTCGGGGAGAAAATTACCC  
GTTTGATTGAATACGCTACTAAAGAATTTCTACCTCTTATTATAGTGTGTGCTTCCGGAGGGGCACGCATGCAAGAAGGA  
AGTGTGAGCTTGATGCAAATGGCTAAAATATCTTCTGCTTTATATGATTAT-----  
CAATCAAATAAAAAGTTATTCTATGTACCAATTCTTACATCTCCTACTACCGGTGGGGTGACAGCTAGTTTTGGTATGTT  
GGGGGATATCATTATTGCCGAACCCAATGCCTACATTGCCTTTGCGGGTAAAAGAGTAATTGAACAAACATTGAATAAAA  
CAGTACCCGAGGGTTACAAGCGGCCGAGTATTTATTCCAGAAAGGCTTATTTCGATCTAATCGTACCACGTAATCCTTTA  
AAAAGCGTTCTGAGTGAGTTATTTCAACTACACACTTTCTTTTCTTTGAATCAAATTAG-----

-----ATGGTAACC-----  
ATTCAAGCCGACGAAATTAGTAATATTATCCGTGAACGTATTGAGCAATATAATAGAGAAGTAAAGATTGTAAATACCGG  
TACCGTACTTCAAGTAGGTGATGGCATTGCTCGTATTCATGGTCTTGATGAAGTAATGGCGGGTGAATTAGTAGAATTTG  
AAGAGGGTACAATAGGCATTGCTCTTAATTTGGAATCAACTAATGTTGGTGTGTTGATTAATGGGTGATGGTTTGTGATA  
CAAGAAGGGAGTTCTGTAAAAGCAACAGGAAGAATTGCTCAGATACCAGTGAGTGAGGCCTATTTGGGTCTGTGTTATAAA  
CGCGCTGGCTAAACCTATTGATGGTAGAGGTGAAATTTTCTTCTGAATATAGGTTAATTGAATCGCCCGCTCCAGGGA  
TTATTTCTCGACGTTCTGTATATGAGCCTCTTCAAACAGGGCTTATTGCTATTGATTCAATGATTCCGATAGGACGTGGT  
CAGCGCGAATTAATTATTGGGGACAGGCAGACCGGTAAAACAGCAGTAGCAACAGATACAATTCTAAATCAACAAGGCAA  
AAATGTAATATGCGTTTTATGTAGCTATTGGTCAAAAAGCATCTTCTGTGGCTCAGGTAGTGACTAATTTCCAGGAAAGGG  
GCGCGATGGAATATAACCATTGTGGTAGCCGAAACGGCGGATTCCCCTGCTACATTACAATACCTCGCTCCTTATACAGGA  
GCAGCTCTGGCTGAATATTTTATGTACCGTGAACGACACACTTCAATCATTATGATGATCCCTCTAAACAAGCCCAAGC  
TTATCGCCAAATGTCTCTTCTATTACGAAGACCGCCTGGGCGCGAAGCTTATCCAGGGGATGTTTTTTTATTTACATTAC  
GCCTTTTGGAAAGAGCTGCTAAATTAAGTTCTCTTTTAGGTGAAGGAAGTATGACCGCTTTACCAATAGTGAAACCCAA  
TCGGGAGATGTTTTCGGCTTATATTCCTACTAATGTCATTTTCGATTACTGATGGACAAATATTCTTATCTGCTGATCTATT  
CAATGCTGGAATCCGACCCGCTATTAATGTGGGGATCTCTGTTCCAGAGTGGGGTCTGCAGCTCAAATTAAGCTATGA  
ACAAGTAGCCGGTAAATTAATAATTGGAACGGCACAATTTCGCAGAATTAGAAGCTTTTGCACAATTTGCTTCTGATCTC  
GATAAAGCTACTCAGAATCAATTGGCAAGAGGTCAACGCTTACGTGAATTGCTTAAACAATCCCAATCCGCCCTCTCGG  
GGTAGAAGAACAGGTACTGACTATTTATACCGGAACAAATGGTTATCTTGATTCAATTAGAAAATTGGACAGGTAAGGAAAT  
TTCTTGTTGAGTTACGTACTTACTTAAAAACCAATAAACCGCAGTTTCAAGAAATAATATCTTCTACCAAGACATTACC  
GAGGAAGCAGAAGCCATTTTGAAGAAGCTATTAAGGAACAGAGGGAACGTTTTTATA---  
---ATGAGAATGAATCCTACTACTTCTGTTCTGGG-----  
GTTACCACGCTTGACAAAAAGACACTGGGGCGTATCGCCAAATCATTGGTCCGGTACTAGATGTAGCCTTTCCGCCAGG  
CAAAATGCCTAATATTTATAACGCTCTGGTAGTTAAGGGTCGAGATACTGCTGGTCAACCAATTAATGTGACTTGTGAGG  
TACAGCAATTATTAGGAAACAATCGAGTTAGGGCCGTAGCTATGAGTGCTACAGATGGTCTAACGAGAGGGATGGACGTA  
ATTGATACGGGAGCTCCACTAAGTGTTCGGTTCGGTGGAGCGACTCTCGGACGAATTTTCAACGTGCTTGGCGAGCCTGT  
TGATAATTTAGGTCCTGTAGATACTAGTACAACATTTCTATTATAGATCTGCGCCTGCCTTTATACAGTTAGATACAA  
AATTATCTATTTTTGAAACCGGAATTAAGTAGTAGATCTTTTAGCCCTTATCGCCGTGGAGGAAAAATCGGACTATTC  
GGGGGAGCTGGCGTGGGTAAAACAGTACTCATTATGGAATTGATTAACAATATTGCCAAAGCTCACGGAGGCGTATCTGT  
ATTTGGCGGAGTTCGGTGAACGGACTCGTGAAGGAAATGATCTTTACATGGAAATGAAAGAATCTGGAGTAATTAATGAAA  
AAAATATTCCAGAATCAAAGTAGCTCTAGTTTACGGTCAGATGAATGAACCGCCGGGAGCTCGTATGAGAGTTGTTTTG  
ACTGCCCTAACTATGGCGGAATATTTCCGAGA

Liriodendron -----  
-----  
-----  
-----

-----ATGAAAAA-----TGGTGGTTCAATTCGATGTTGTCT-----  
AACGAGGAGTTAGAACACAGGTGTGGTCTAAGTAAATCAATGGACAGT---CTTGGCTGTCCTATTGGAAATACC-----  
-----AGTGAAGTGAAGACCCATTATA---AATGATACGGATAAAAAACATTCATAGTTGG-  
--AACGAT-----AGTGGCAGTTATAGTTGC---AGTAATGTTGATCATTTTTTTA-----  
GGTGTACGGACATTTGGAGTTTCATCTCTGATGAAACTTTTTTAGTT-----  
AGGGATAGTAATGGTAACAGTTATTCCGTATATTTTGATATTGAAAATCATATTTTTTGAGATTGAC-----

-----AAT-----GATAGTTCTTTTCTGAGTGAAC TAGAA-----  
AGTTCTTTTTCTAGTTATCTG-----AAT-----  
-----AATGGG-----TCGAAGAGTGACAAT---  
CGCTACTATGATTGTGAC-----ATGTATGAT-----ACTAAATATAGTTGGAATAATCATT-----  
AATAGTTGCATTGATAGTTATCTT-----CGTTCTGAAATCAGTATTGAT---

AGTTACATTTCAAGTGGTAGCGACAATTGC-----AGTGACAGT-----  
-----TACATTTATAGTTATATTTGTAGTGGTGAAAGT---  
ATA---AGTGGTAGTGATAGT-----GGGAGTTCTAATATAAGAAGT-----  
GACGGTAAT-----GGCAGTGATATA---AGA-----GGAAGATCG-----  
AATGATTTT-----GATATAAAT---CAAAAATACAGACATTTATGGGTTCAATGCGAA-----  
AATTGTTATGGATTAAAT-----TATAAGAAATTTTTTAAGTCAAAAATGAATATTTGT-----  
GAACAATGTGGATATCATTGAAAATGAGTAGTTCAGATAGAATCGAACTTTTCGATTGATCCGGGCACCTGGGATCCT--  
-ATG---GAT---GAAGACATGGTCTCTATCGACCCCATT---GAATTTAC-----  
-----TCGGAAGAGGAGCCT-----

TATAGAGATCGTATCGATTTCGATCAAAGAAAGACAGGTTTAACTGAGGCTGTTCAAACAGGCATAGGTCAACTAAATGG  
TATCCCATAGCAATTGGGGTTATGGATTTTGGATTTCATGGGAGGTAGTATGGGATCCGTAGTAGGCGAGAAAATCACCC  
GTTTGATCGAGTATGCTACTAATAGATCTTTACCTGTTATTATGGTGTGTGCTTCTGGAGGAGCACGCATGCAAGAAGGA  
AGTTTGAGCTTGATGCAAATGGCTAAAATATCTTCCGCTTTATATGATTAT-----  
CAATCAAATAAAAAGTTATTCTATGTATCAATCCTTACATCTCCTACAACCTGGTGGAGTGACAGCCAGTTTTGGTATGTT  
GGGAGATATCATTATTGCTGAACCCAATGCCTACATTGCATTTGCGGGTAAAAGAGTAATTGAACAAACATTGAATAAGA  
CAGTACCCGACGGTTACAAGCGGCTGAGTATTCCATAAGGGCTTATTTGATCCAATCGTACCACGTAATCTTTTA  
AAAGGTGTTCTGAGTGAATTTTTCAGCTACACGGTTTCTTTCCCTTGACTCAAAAATTA-----  
-----ATGGTAACC-----

ATTCGAGCCGACGAAATTAGTAATATTATCCGTGAACGTATTGAACAATATAATAGAGAAGTCACGATTGTGAATACCGG  
CACTGTACTTCAAGTAGGCGATGGTATTGCTCGTATTTCATGGTCTTGATGAAGTAATGGCAGGGGAATTAGTAGAATTTG  
AAGAGGGTACAATAGGCATTGCTCTGAATTTGGAATCAAACAATGTTGGCGTTGTATTAATGGGTGACGGTTTGTGATA  
CAAGAGGGGAAGTTCTGTAAGCAACAGGAAGAATTGCTCAGATACCAGTGAGTGAGGCTTATTTGGGTCGTGTTATAAA  
TGCTCTGGCTAAACCTATTGATGGGAGAGGCGAAATTTTCAGCTTCTGAATCTCGGTTAATTGAATCTCCCGCTCCAGGTA  
TTATTTCTAGACGTTCCGTATATGAGCCTCTTCAAACGGGGCTTATTGCTATTGATTTCGATGATCCCTATAGGGCGCGGT  
CAGCGAGAATTAATTATTGGGGACAGACAGACCCGGGAAAACAGCAGTAGCCACAGATACTATTCTCAATCAAAAAGGCCA  
AAATGTAATATGTGTTTATGTAGCTATTGGGCAAAAAGCATCTTCCGTGGCCCAGGTAGTGACTACTTTCCAGGAACAGG  
GGGCGATGGAATACACTATTTGTGGTAGCCGAAACGGGATTCACCTGTACATTACAATACCTCGCTCCTTATACAGGA  
GCGGCTCTAGTGAATATTTTATGTACCGTGAACGACATACTTCAATAATTTATGATGATCCCTCAAACAAGCACAAAGC  
TTATCGCCAAATGTCTCTTCTATTAAGAAGACCACCCGGTCTGTAAGCTTATCCAGGAGATGTTTTTTTATTGCAATCAC  
GCCTTTTGGAAAGAGCTGCTAAATCAAGTTCTCGTTTGGTGAAGGAAGTATGACTGCTTTACCAATAGTTGAGACTCAA  
TCTGGGGACGTTTTCGGCTTATATTCCTACTAATGTGATTTCCATTACAGATGGACAAATATTCTTATCTGCCGATCTATT  
CAATGCTGGAATCCGTCCTGCTATTAATGTGGGTATTTCCGTCTCCAGAGTAGGATCTGCCGCTCAAATTAAGCCATGA  
AACAAGTAGCTGGCAAATCAAAATTGGAACCTGGCTCAATTCGCGGAGTTAGAAGCCTTTGCCCAATTTGCTTCTGACCTC  
GATAAAGCCACTCAGAATCAATTGGCAAGAGGTCAACGATTACGCGAGTTGCTCAAACAATCCCAATCAACTCCTCTCAC  
GGTGAAGACCAGATAGTTACTATTTATACCGGAGCGAATGGGTATCTTGATCCGTTAGAAATTGGGCAGGTAAAGAAAT  
TTCTCGTTACGTTACGTACCTACTTAAAAACAAATAAACCTCAGTTACAAGAAATCATATCTTCTACCAAGACATTCACC  
GAGCAAGCAGAAGCCCTTTTGAAGGAAGCTATTCCGGAACAGATAGAAGTGTCTA---CTTCAGGAACAA-----  
-----ATGAGAATCAATCCTACTACTTCTAGTCCTGGG-----

GTTTCCACACTTGAAGAAAAAACCTGGGGCGTATTGTTCAAATCATTGGTCCGGTACTGGATGTAGCTTTTCCCCGGG  
CAAGATGCCTAATATTTACAACGCTTTGGTAGTTAAGGGTCGAGATACTGTCCGGTCAGCAAATTAATGTGACTTGTGAGG  
TACAGCAATTATTAGGAAATAATCGAGTTAGAGCTGTAGCTATGAGTGCTACAGATGGTCTGATGAGAGGAATGGAAGTG  
ATTGACACGGGAGCTCCTCTAAGTGTTCAGTCGGTGGAGCTACTCTCGGACGAATTTTCAACGTTCTTGGAGAGCCTGT  
TGATAATTTAGGGCCTGTAGATACTCGACAACATCTCCTATTATAGATCTGCGCCTGCTTTTATCCAGTTAGATACCA  
AATTATCAATCTTTGAAACAGGGATTAAAGTGGTGGATCTTTTAGCTCCTTATCGCCGTGGAGGAAAAATCGGACTATTC  
GGGGGAGCTGGAGTGGGTAAAACAGTACTCATCATGGAATTGATCAACAACATTGCCAAAGCTCATGGAGGTGTATCTGT  
ATTTGGCGGAGTAGGCGAACGTAAGTACTCGTGAAGGAAATGATCTTTACATGGAAATGAAAGAATCTGGAGTGATTAATGAAC  
AAAATATTGCAGAATCCAAAGTAGCTCTAGTCTATGGTCAGATGAATGAACCGCCGGGAGCTCGTATGAGAGTTGGTTTG  
ACTGCCCTAACTATGGCGGAATATTTCCGGGA

Lotus

-----ATGGAAAA-----TGGTGGTTAAATTTCTATGTTGCGT-----  
AATAGGGAGTTAGCATACAAGTGTGGGTAAAGTAAATCAACGGATAGG---TTCGGT---CCTATTGAAAATACC-----

-----AGTGTAAAGTGAAGACCCGCCTATTTTAACTGATATGGATAAAAAACATTCATAGTTGG--  
--AATGAT-----ATTGAGAATTGTAGTTAC---AACAATGTTGATTATTTAGTA-----  
GGTGTGGAGAACATCCGGAATTTCTATCTAATAAAAAGTTTTTTAGTT-----  
AGGGATAGTAAGAGGAACAGTTATTCCATATATTTTGGCTATTGAAAATCAAATTTTGGAGATTGAT-----  
-----  
-----AAT-----GATCATTGTTTTTAAGTGAAGTAGAA-----  
AGTTTTTTTTCTAGGTATACG-----  
AATTCTATCTAT--TTG-----AATAACAGC-----TCTAAAGGGGATGGT-----  
----GATCATTAC-----ATGTATGAT-----ACTGAATCTAGTTGGAATAATAACATT-----  
AATAGTTTCATTGAAAATTATATT-----CGTTCTCAAATTTGTATTGAT---  
AATTACATTTTAGGTGATGGTGACAAATAC-----AATGATAGT-----  
-----TACTTTTATAGTTATATTTGT---AGTACGATA---  
AGAAAAAAAAAGTAGTGAAAGGGGAGAGG-----ACTAGCATAATAACT-----  
AGCACAAATAATCTAAAT-----GATAGTGATTTCT---ACTAAAATAGAAGGTTCT-----  
AATGATCTC-----GATGAGACT---CAAAAATACAAACATTTGTGGATTGAATGCGAA-----  
AATTGTTATGGATTAAAT-----TATAAGAAAATTTGAAATCAAAAATGAATATTTGT-----  
GAACACTGTGGATATCATTGAAAATGAGCAGTTTCCAGATAGAATCGAACTTTTCGATTGATCCGGGTACTTGGAAATCCT--  
-ATG---GAT---GAAGACATGATTTCTGTGGATCCCATT---GAATTTTCA-----  
-----TCCGAAGAGGAACCT-----  
-----  
TATAAAGATCGTATTGATTCTTATCAAAAAACGACAGGATTAACCGAGGCTGTTCAAACAGGTACGGGTCATTTAAATGG  
TATTCCTGTAGCAATTGGGATTATGGATTTTGGATTTATGGGAGGTAGTATGGGATCCGTAGTAGGTGAGAAAATCACCC  
GGTTGGTTCGAATATGCTACCAACCAACTTTTACCTCTTATTGTAGTATGTGCATCTGGAGGAGCACGTATGCAAGAAGGA  
AGTTTGAGTTTGATGCAAAATGGCTAAAATATCTTCTGCTTTATATGATTAT-----  
CAACTAAATAAAAAGTTATTCTATGTATCAATCCTTACATCTCCCCTACTGGTGGGGTAACAGCTAGTTTTGGCATGTT  
GGGGGATATCATTATTGCCGAACCAATGCTTACATTGCATTTGCGGGTAAAAGAGTAATTGAACAAACCTTGAATAAGG  
CAGTACCCGAAGGTTACAGGCGGCAGAATATTTATCCATAAGGGCTTGTGTTGATTCAATCGTACCACGTAATCCTTTA  
AAAGGGATTCTAAGTGAGTTATTTTCCAGCTCCACGCTTTCTTTCTTTGATTCAAAAATGAAAAAGAAAGCAGATCCTAA--  
-----ATGGTAACT-----  
ATTCGTGCAGATGAAATTAGTAAAATTATCCGTGAACGGATTGAGCAATATAATACCGAAATTAATAATTGTAAATACAGG  
TACTGTACTTCAAGTAGGCGATGGCATTGCTCGTATTTATGGTCTTGATGAAGTAATGGCTGGTGAATTGGTGGAAATTTG  
AAGAGGGTACCATAGGCATTGCTTTGAATTTGGAATCCAAAAACGTTGGTGTGTTGATTAATGGGCGATGGTTTGATGATA  
CAAGAGGGAAAGTTCGGTAAAAGCAACAGGAAGAATTGCTCAGATACCTGTAAGTGAGGGTTATTTGGGTCGTGTTATAAA  
TGCTCTGGCTAAACCTATTGACGGTTCGGGGAGAAATTTTATCTTCCAGAATCTCGGTTAATCGAATCCCCCGCTCCCCGTA  
TTATTTTCGAGACGTTCTGTATATGAGCCTCTTCAAACAGGACTTATTGCTATTGATTTCGATGATCCCTATAGGGCGCGGC  
CAGCGAGAATTAATTATTGGGGACAGACAAACAGGTAAAACAGCAGTAGCCACAGATACGATTCTCAATCAACAAGGACA  
AAATGTAATATGTGTTTATGTAGCTGTTGGTCAAAAAGCATCGTCTGTAGCTCAAGTGGTGAATACTTTACAAGAAAGAG  
GAGCGATGGAATACACTATTGTAGTAGCTGAAACGGCAGATTCTCCAGCTACATTGCAATATCTCGCTCCTTATACAGGA  
GCAGCTCTCGCTGAATTTTTTATGTACCGTGAACGCCACACTTTAATCATTATGATGATCTCTCAAACAAGCGCAGGC  
TTATCGCCAAATGTCTCTTCTATTACGAAGACCACCCGGTTCGCAAGCTTATCCGGGAGATGTTTTTTATTTGCATTTCG  
GTCTTTTGGAACGAGCTGCTAAATTAAGTTCTCAGTTAGGTGAAGGGAGTATGACTGCTTTACCAATAGTTGAGACCCAA  
TCAGGAGATGTTTCAGCTTATATTCCTACTAATGTAATTTCCATTACGGATGGCCAAATATTTTTATCTGCCGATCTATT  
CAACGCTGGGATCAGACCCGCGATTAATGTGGGTATTTCTGTTTCCAGAGTTGGATCGGCGGCTCAAATTAAGCCATGA  
AACAAGTAGCCGGTAAATTAATAATTGGAATTGGCACAATTTCGAGAATTAGAAGCTTTTGCACAATTCGCTTCTGATCTT  
GATAAAGCTACTCAAAATCAATTGGCAAGAGGTCAACGATTACGCGAGTTGCTTAAACAATCCCAATCAGCCCCTCTCAC  
TGTGGAAGAACAGGTAATAACTATTTTATACCAGAACTAATGGTTATCTTGATTCAATTAGAAAATTAGACAGGTACGGAAAT  
TTCTCGTTGAGTTACGTGCTTACTTAAAAACGAATAAACCTCAATTCACAGAAATCATATCTTCTACCAAGACATTCCT  
GGGAAGCAGAAGCTCTTTTGAAGAAGCTATTAGGAACAGATGGAACCTTTTTTA---  
CTCCAAGAACAAGTAGAAAAG---AATATGATAATAAATCCTACCCTTCTGATCCTGAA-----  
GTTTCTGCTCTTGAAAAAAAAAAATACGGGACGTATCGCCCAAATAATTGGTCCGGTACTAGATGTAACCTTTTCCCCCAGG  
GAAGATGCCCAATATTTACAACGCTCTAATAGTTAAAGGTTCGAGATACTGTTGGTCAACAAATTAACGTGACTTGTGAAG  
TACAGCAATTATTAGGAAATAATCGCGTTAGAGCTGTAGCTATGAGTGCTACGGATGGTCTAACGAGAGGAATGGAAGTT  
ATTGACACAGGAGCTGCTCTAAGTGTTCGGTGGGTGGAGTAACTCTAGGACGAATTTTCAACGTACTTGGCGAGCCTAT  
TGATAATTTGGGTCCTGATATACTCGTACAACATCTCTATTACAGATCCGCGCCTGCCTTTATACAATTAGATACAA  
AATTATCCATTTTTGAAACAGGAATTAAGTAGTAGATCTTTTAGCTCCTTATCGCCGTGGAGGAAAAATAGGACTTTTC  
GGTGGAGCTGGAGTGGGTAAAACAGTACTCATTATGGAATTAATCAATAACATTGCCAAAGCTCATGGGGGTGTGTCCGT  
ATTTGGCGGAGTAGGTGAGCGTACTCGTGAGGGAACGATCTTTACATGAAATGAAAGAATCCGGAGTAATTAATGAAA

AAAATATTGCAGAATCAAAAGTAGCTCTAGTCTACGGTCAAATGAATGAACCGCCTGGAGCTCGTATGAGAGTTGGGTTA  
ACTGCCCTAACTATGGCGGAATATTTTCGAGA

Morus

-----ATGGAAAA-----TGGCGGTTTCGATTCAATGTTGTTT-----  
AGCGGGGTATTAGAATACAGGTGTGGGCTAAGTAAATCAATAAATAGT---CTTGGTGATCCTATTGAAAATACT-----  
-----AGTGTAATGAAGATCCGATTATA---AATGATATGGATAAAGACATTCCTAGTGGG-  
--AGCGAT-----AGTGACAATTCTAGTTAC---AGTAATGTTGATCATTAGTC-----  
GGCGTCAGGTACATTCGGAATTTCTATCTGATGACACTTTTTTAGTT-----  
AGGGATAGTAATAGGGATAGTTACACCATATATTTTGATATTGAAAATCAAATTTTTGAAATTGAC-----  
-----AAC-----CATGATTCTTTTATAAGTGAACCAGAA-----  
AATTCTTTTTTATAGTTATCAG-----  
AATTCTAGTTAT---CTG-----AATAATGTA-----TCGAAGAATGACGAT---  
CCTCGCTATGATCGTTAC-----GTGTATGAT-----ACTCAATATAGTTGGAATAATCACATT-----  
AATAGTTGCATTGGCAGTTATCTT-----CGTTATCAAATCTGTATTGAT---  
AGTGACATTTTAACTAGTAGTGACAATTAC-----AATGACAAT-----  
-----TACATTTATACTTATATTTGT---GGCGAAAGA---  
GTA---AATAGTAATGAAAGC-----GAGAGTTCCAATATAAGAACT-----  
GGTGCGGAT-----GATAGTGATTTAACTATAAGAGAGAGTTCT-----  
AATGATTTA-----GATGTAAC---CAAAAATACAGGCATTTGTGGGTTCAATGTGAA-----  
AATTGTTATGGATTAAT-----TATAAGAGATTTTTGAAATCAAAAATGAATATTTGT-----  
GAACATTGTGGATGTCATTTGAAAATGAGTAGTTTCCAGATAGAATCGAACTTTTGATTGATCCAGGTACTTGGGATCCT--  
-ATG---GAT---GAAGACATGGTCTCTCTGGATCCTATT---GAATTTAAT-----  
-----TCGGAGGAGGAACCT-----

TATAAAGATCGTATTGATTCTTATCAAAGAAAGACGGGATTAACGGAGGCTGTTCAAACAGGTACAGGTAAACTAAACGG  
CATTCCCCTAGCAATTGGGGTTATGGATTTTTAGTTTTATGGGGGTAGTATGGGATCTGTAGTGGGCGAGAAAATTACAC  
GTTTGATCGAGTATGCTACCAATCAATCTTTACCTCTTATTCTAGTATGTGCTTCCGGAGGAGCACGCATGCAAGAAGGA  
AGTTTGAGTTTGATGCAAATGGCTAAAATATCTTCTGCTTTATATGATTAT-----  
CAATCAAATAAAAAGTTATTCTATATAGCAATCCTTACATCTCCTACTACGGGTGGGGTGACAGCTAGTTTTGGTATGTT  
GGGAGATATCATTATTGCCGAACCCAATGCCTACATTGCATTTGCGGGTAAAAGAGTAATTGAACAAACATTGAATAAGA  
CAGTACCTGAGGGTTCACAAGTGGCTGAATATTTTCCATAAGGGCTTATTTCGATCCAATCGTACCACGTAATCCTTTA  
AAAGGCGTTCTGAGCGAGTTATTTTCCAGCTCCATGCTTTCTTTTCTTTGAATCAAATTCATCAAGTAG-----  
-----ATGGTAACC-----

ATTCGAGCCGATGAAATTAGTGATATTATCCGTGAACGTATTGAACAATATAATAGAGAAGTAAAGATTTTTAAATACCGG  
TACCGTACTTCAAGTAGGCGATGGCATTGCTCGTATTTATGGTCTTGATGAAGTAATGGCAGGTGAATTAGTAGAATTTG  
AAGAAGGTACGATAGGCATTGCTCTGAATTTGGAATCAAATAATGTTGGTGTGTTGATTAATGGGTGACGGTTTTGATGATA  
CAAGAAGGAAGTTCTGTAAAAGCAACAGGACGAATTGCTCAGATACCGGTAAGTGAGGCTTTTTTGGGTCTGTGTTATAAA  
TGCCTGGCTAAACCTATTGATGGTTCGAGGTGAAATTTAGCTTCTGAATCTCGTTTAAATTGAATCTCCTGCTCCGGGTA  
TTATTTTCGAGACGTTCTGTATATGAGCCTCTTCAAACAGGACTTATTGCTATTGATTCAATGATACCTATAGGACGTGGT  
CAGCGAGAATTAATTTTGGGGACAGACAGACTGGTAAAACAGCGGTAGCTACAGATACGATTCTCAATCAACAGGGGCA  
AAACGTAATATGTGTTTATGTAGCTATTGGTCAAAAAGCATCTTCTGTGGCTCAGGTAGTGACTACTTTACAAGAAAGGG  
GAGCAATGGAATACACTATTGTGGTAGCTGAAACGGCGGATTCTCCGGCTACATTACAATACCTCGCTCCTTACACAGGA  
GCAACTTTGGCTGAATATTTTATGTACCGTGAACAACACACTTCAATCATTATGATGATCCCTCCAAACAAGCACAGGC  
TTATCGCCAAATGTCTCTTTTATTACGAAGACCGCCGGGTCGCGAAGCTTATCCCGGAGATGTTTTTTATTTGCAATCAC  
GCCTTTTGGAAAGAGCTGCTAAATCAAGTTCTCGTTTAGGTGAAGGAAGTATGACTGCTTTACCAATAGTTGAGACTCAA  
TCGGGAGATGTTTTCGGCTTATATTCCTACTAATGTAATTTCCATTACAGATGGACAAATATTCTTATCCGCGGATCTGTT  
CAATGCTGGAATCAGACCTGCTATTAATGTGGGTATTTCTGTTTCCAGAGTAGGATCTGCGGCGCAAATTAAGCTATGA  
AACAGTAGCCGGCAAATTAATAATTGGAATTGGCACAATTTCGAGAATTAGAAGCCTTTGCACAATTTGCCTCTGATCTC  
GATAAAGCTACTCAGAATCAATTGGCAAGAGGTCAACGATTACGTGAGTTGCTCAAACAATCTCAATCAGCCCCTCTAGC  
GGTGAAGAAGCAGATAATCACTATTTATACCGGAACGAATGGTTATCTTGATTCAATTAGAAATTGGACAGGTAAGGAAAT  
TTCTCGTTGAGTTACGGACTTACTTAAAACGAATAAACCTCAGTTCCAAGAAATCATATCTTCTACCAAGACATTTACT

AAGGAAGCAGAAGCCCTTTTGAAGAAGCTATTTCAGGAACAGATGGAGCGTTTTCTC---CTTCAAGAACAAGTATAA--  
-----ATGAGAATAAATCCTACTACTTCTAGTCCTGGG-----  
GTTCCCGCGCTTGAAAAAAAAAACCTGGGGCGTATTGCTCAAATCATTGGTCCGGTACTAGATGTAGCTTTTCCGCCGGG  
CAAGATGCCTAATATTTACAACGCTCTGGTAGTTAAGGGTCGAGATACTGTTGGTCAACAAATTAATGTGACTTGTGAAG  
TACAGCAATTATTAGGAAATAATCGAGTTAGAGCTGTAGCTATGAGTGCTACAGATGGTCTAATGAGAGGAATGGAAGTG  
ATTGACACAGGAGCTCCTTTAAGTGTTCAGTCGGCGGAGCGACGCTAGGACGAATTTTCAACGTGCTTGGAGAGCCCAT  
TGATAATTTAGGTCTGTAGATACTCGCACAACATCTCCTATTTCATAGATCTGCGCCTGCCTTTATACAATTAGATACAA  
AATTATCTATTTTTGAAACAGGAATTAAGTAGTAGATCTTTTAGCCCCTTATCGCCGTGGAGGAAAAATAGGACTATTC  
GGGGGGGCTGGAGTAGGTAAAACGTACTCATTATGGAATTGATCAACAACATTGCCAAAGCTCATGGAGGTGTATCCGT  
ATTTGGCGGAGTAGGTGAGCGTACCCGTGAAGGAAATGATCTTTACATGGAAATGAAAGAATCCGGCGTAATTAATGAAC  
AAAATATTGCAGAATCAAAAGTGGCTCTAGTCTACGGTCAGATGAATGAACCGCCGGGGGCTCGTATGAGAGTTGGTTTA  
ACTGCCCTAACTATGGCGGAGTATTTTAGAGA

Nandina

-----ATGGAAAAGGAAAAATGGTGGTTCAATTCGATGTTGTTT-----  
AACAGGGAGTTAGAATACAGGTGCGGGCTAAGTAAATCGACGGATGGT---ATTGGT---CCTATTGGAAATACT-----  
-----AATGGAAGTGAAGACCCTGTTATA-----GATAAAAACATTCATTGTTGG-  
--GGTGAT-----AGTGACAGCTCCAGTTGC---AATAATGTTGATCGTTTATTC-----  
GGTGTGAGGGGCATTCGGAATTTTCATCTCTGATGACACTTTTTTAGTT-----  
AGGGATAGTAATGGTGACAATTATTCATCTATTTTGATATTGAAAATCATATTTTTTGAGATTGAC-----

-----AAC-----GATCGTTAT-----GAACTCGAA-----  
AGTTCTTTTTCTAGTTATCTA-----  
AATTCTAGTTAT---CTG-----AATACTGGG-----TCTAAGAGTAACAAT---  
CACTACTATGATCGTTAC-----ATGTATGAT-----ACTAAATATAGTTGGAATAATCACATT-----  
AATAGTTGCATTGACAATTATCTT-----GATTCTGAGATCCGTATTAAT---  
AGTTACTTTTTCAAGTGGTGGCGACAATTAC-----AGTAAGAGT-----  
-----TACATTTATAGTTACATTTGT---AGTGAAAGT---  
GTA---AATAGTATTGCCAAT-----GCGAGTTCCGATATAAAAACT-----  
AGTGCAAATGAAAGTGATTCCCATGAAAGTGATTCC---CATATGCGAGGAAAATAT-----  
AATGATCTC-----GATATAAAT---AAAAAATACAGGCATTTGTGGGTTCAATGCGAA-----  
AATTGTTATGGATTAAT-----TATAAGAAATTTTTTAGATCAAAATTTAATATTTGT-----  
GAACAATGTGGATATCATTGAAAATGAGTAGTTTCAGATAGAATCGAACTTTTCGATTGATCCGGGCCTTGGGATCCT--  
-ATG---GAT---GACGACATGGTTTTCTGTGGACCCCAT---GAATTTTCAT-----  
-----TCGGAGGAGGAACCT-----

TATAAAGATCGTATTGATTCTTATCAAAAAAAGACAGGGTTAACTGAGGCTGTTCAAACAGGTATAGGTCAATTAACGG  
TATTCCCATAGCAATTGGGGTTATGGATTTTCAGTTTCATGGGGGGAAGTATGGGATCCGTAGTAGGCGAGAAAATAACTC  
GTTTGATCGAATATGCTACTAATAGATCTCTACCTGTTATTATAGTGTGTGCTTCCGGAGGAGCGCGCATGCAAGAAGGA  
AGTTTGAGTTTGATGCAAAATGGCAAAAATATCTTCCGCTTCATATAATTAT-----  
CAATCAAATAAAAAGTTATTATATGTATCAATCCTTACATCTCCTACAACCGGTGGGGTGACCGCAAGTTTTGGTATGTT  
AGGAGATATCATTATTGCCGAACCTAATGCCTACATTGCATTTGCGGGTAAAAGAGTAATTGAACAAACATTGAATAAGA  
TAGTACCTGATGGTTCACAAGCGGCTGAGTATTTTATCCATAAAGGCCTATTCGACCCAATCGTACCACGTAATCTTTTA  
AAGGGTGTGTTGAGTGAGTTATTTCAACTTCACGGTTTTTTTCCCGTGAATTCAAATTCATCAAGTAG-----  
-----ATGGCAACC-----  
CTTCGAGCCGACGAAATTAGTAACATTATCCGCGAGCGTATTGAGCAATATACTACAGAAGTAAAGATTGTGAATACCGG  
CACCGTACTTCAAGTGGGCGATGGCATTGCTCGTATTACCGGTCTTGATGAAGTAATGGCAGGCGAATTAGTAGAATTTG  
AAGAGGGTACAATAGGCATTGCTTTGAATTTGGAATCAAATAATGTTGGTGTGTTATTAATGGGTGATGGTTTTGATGATA  
CAAGAGGGAAAGTTCTGTAAGCAACAGGAAGAATTGCTCAGATACCGGTGAGCGAGGCTTATTTGGGTGCTGTTATAAA  
TGCTCTGGCTAAACCTATTGACGGTAGAGGTGAGATTCCAGCTTCTGAATCTCGATTAATTGAATCTCCCGCTCCAGGTA  
TTATTTCCGAGACGTTCCGTATATGAACCTATGCAAACAGGGCTTATTGCTATTGATTTCGATGATCCCTATAGGACGAGGT  
CAGCGAGAATTAATTATTGGGGACAGACAGACCGGTAAAACAGCAGTAGCCACGGATACTATTCTCAATCAAAAAGGGCA  
AAATGTAATATGTGTTTATGTAGCTATTGGGCAAAAAGCATCTTCTGTGGCTCAGGTAGTGACTACTTTCCAGGAACAGG

GGGCGATGGAATATACTATTGTGGTAGCCGAAACAGCCGACGCGCCTGCTACATTACAATACCTCGCTCCTTATACAGGA  
GCGGCTCTGGCTGAATATTTTATGTACCGTGAACGACATACTTCAATCATTTATGATGATCCTTCTAAACAGGCACAAGC  
TTATCGCCAAATGTCTCTTCTATTACGAAGACCACCAGGTGCGGAAGCTTATCCAGGAGATGTTTTTTATTTGCATTAC  
GCCTTTTGGAAAGAGCCGCTAAATCAAGTTCTCGTTTAGGTGAAGGAAGTATGACTGCTTTACCAATAGTTGAGACTCAA  
GCGGGAGACGTTTTAGCTTATATTCCAACATAATGTAATTTCCATTACAGATGGACAAATATTCTTATCCGCTGATCTATT  
CAATTCTGGAATCCGACCTGCTATTAATGTGGGTATTTCCGTTTCCAGAGTAGGGTCTGCGGCTCAAATTAAGCCATGA  
ACAAGTAGCTGGCAAATTAATAATTGGAACGGCTCAATTGCGCAGAGTTAGAAGCCTTTGCACAATTCGCTTCTGATCTC  
GATAAAGCTACTCAGAATCAATTGGCAAGAGGTCAACGATTACGTGAGTTGCTCAAACAATCCCAAGCAGCCCCTCTCAC  
GGTGGGAGAACAATATTGACGATTTATACCGGAACGAATGGATATCTTGATTGTTAGAAAATTGGACAGGTAAAGAAAT  
TTCTCGTTGAATTACGTACCTATTTAAAAACAATAAACCTCAGTTCCAAGAAATCATATCTTCTACCAAGACATTGACC  
GAAGAGGCAGAAGTACTTTTGAAGAAGCTATTCAGGAACAGACGGAGCGGTTTATA---CTTCAGGAACAAACA-----  
-----ATGAGAATCAATCCTACTACTTCTGGTCTGGG-----

GTTTCCGCACTTGAAGAAAAAAACCAGGGGCGTATCGTTCAAATCATTGGTCCGGTACTGGATGTAGCCTTTCCACCGGG  
CAAGATGCCTAATATTTACAATGCTTTGGTAGTTAAAGGTCAAGATACTGTTGGCCAACAAATTAATGTGACTTGTGAAG  
TACAGCAATTATTAGGAAATAATCGAGTTAGAGCTGTAGCTATGAGTGCTACAGATGGTCTGATGAGAGGAATGGAAGTG  
ATTGACACAGGAGCTCCTCTAAGTGTTCGGTGGTGGAGCGACTCTCGGACGAATTTTCAACGTTCTTGGAGAGCCTGT  
TGATAATTTAGGTCCTGTAGATACCCGCACAACATCTCCTATTATAGATCTGCGCCTGCCTTTATACAGTTAGATACCA  
AATTATCTATTTTTGAAACAGGGATTAAGTAGTGGATCTTTTAGCTCCCTATCGCCGTGGAGGAAAAATCGGACTATTC  
GGGGGGGCTGGAGTAGGTAAAACAGTACTCATCATGGAATTGATCAACAACATTGCCAAAGCTCATGGAGGTGTATCCGT  
ATTTGGCGGAGTAGGCGAACGTACTCGTGAAGGAAACGATCTTTACATGGAAATGAAAGAATCCGGAGTGATTAATGAAC  
AAAATATTGCAGAATCAAAGTAGCCCTAGTCTATGGTCAGATGAATGAACCGCCGGGAGCTCGTATGAGAGTTGGATTG  
ACTGCCCTAACCATGGCCGAATATTTCCGGGA

Nicotiana -----  
-----  
-----  
-----  
-----

ATGACTATTTCATCTATTGTATTTTCATGCAAATAGGGGGCAAGAAAACCTCTATGGAAAGA-----  
TGGTGGTTTTAATTCGATGTTGTTT-----AAGAAGGAGTTCGAACGCAGGTGTGGGCTAAATAAATCAATGGGCAGT--  
-CTTGGT---CCTATTGAAAATACC-----AATGAAGATCCAAATCGA---  
AAAGTG-----AAAAACATTCATAGTTGG---AGGAAT-----CGTGACAATTCTAGTTGC---  
AGTAATGTTGATTATTTATTC-----GGCGTTAAAGACATTCGGAATTTTCATCTCTGATGACACTTTTTTTAGTT--  
----AGTGATAGGAATGGAGACAGTTATTCCATCTATTTTGATATTGAAAATCATATTTTTTGAGATTGAC-----  
-----AAC-----GATCATTCTTTTCTGAGTGAAGTAGAA-----

AGTTCTTTTTTATAGTTATCGA-----  
AACTCGAATTAT---CGG-----AATAATGGA-----TTTAGGGGCGAAGAT---  
CCCTACTATAATTCTTAC-----ATGTATGAT-----ACTCAATATAGTTGGAATAATCACATT-----  
AATAGTTGCATTGATAGTTATCTT-----CAGTCTCAAATCTGTATAGAT---  
ACTTCCATTATAAGTGGTAGTGAGAATTAC-----GGTGACAGT-----  
-----TACATTTATAGGGCCGTTTGTGGTGGTGAAAGT---  
CGA---AATAGTAGTGAAAAC-----GAGGGTTCCAGTAGACGAACT-----  
CGCACGAAG-----GGCAGTGATTTA---ACTATAAGAGAAAAGTTCT-----  
AATGATCTC-----GAGGTAAC---CAAAAATACAGGCATTTGTGGGTTCAATGCGAA-----  
AATTGTTATGGATTAAT-----TATAAGAAATTTTTGAAATCAAAAATGAATATTTGT-----  
GAACAATGTGGATATCATTGAAAATGAGTAGTTTCAGATAGAATTGAACTTTTGATCGATCCGGGTACTTGGGATCCT--  
-ATG---GAT---GAAGACATGGTCTCTCTAGATCCCATT---GAATTTTCAT-----  
-----TCGGAGGAGGAGCCT-----

TATAAAGATCGTATTGATTCTTATCAAAGAAAGACAGGATTAACCGAGGCTGTTCAAACAGGCATAGGCCAACTAAACGG  
CATTCCCCTAGCAATTGGGGTTATGGATTTTTCAGTTTATGGGGGTAGTATGGGATCCGTAGTCGGAGAGAAAATCACCC  
GTTTGATTGAATACGCTGCCAATCAAATTTTACCCCTTATTATAGTGTGTGCTTCTGGGGGGGCGCGCATGCAGGAAGGA  
AGTTTGAGCTTGATGCAAATGGCTAAAATATCGTCTGCTTTATATGATTAT-----  
CAATTAATAAAAAGTTATTTTATGTATCAATCCTTACATCTCCGACAACCTGGTGGAGTGACAGCTAGTTTTGGTATGTT  
GGGGGATATCATTATTGCCGAACCAACGCCTACATTGCATTTGCAGGTAAGAGTAATTGAACAAACATTGAATAAAA  
CAGTACCCGAAGGTTACAAGCAGCTGAATACTTATTCCAGAAGGGTTTATTTCGACCTAATTGTACCACGTAATCTTTTA

AAAAGCGTTCTGAGTGAGTTATTTAAGCTCCACGCCTTTTTTCTTTGAATCAAAAGTCAAGCAAAATCAAGTAG-----  
-----ATGGTAACC-----

ATTCGAGCTGACGAAATTAGTAATATTATCCGTGAACGTATTGAACAATATAATAGAGAAGTAAAGATTGTAAATACCGG  
TACCGTACTTCAAGTAGGCGACGGCATTGCTCGTATTACGGTCTTGATGAAGTAATGGCGGGTGAATTAGTCGAATTTG  
AAGAGGGTACAATAGGCATTGCTCTGAATTTGGAATCAAATAATGTTGGTGTGTATTAATGGGCGATGGTTTATTGATA  
CAAGAAGGAAGTTCTGTAAAAGCAACGGGAAGAATTGCTCAGATACCCGTGAGTGAGGCTTATTTGGGTCGTGTTATAAA  
TGCCCTGGCTAAACCTATTGATGGTAGAGGTGAAATTTAGCTTCTGAATTTGATTAATCGAATCTGCCGCCCGGGTA  
TTATTTTCGCGCCGTTCCGTATATGAGCCTCTTCAAACCGGGCTTATTGCTATTGATTGATCGATGATCCCTATAGGACGTGGT  
CAGCGAGAATTAATTATTGGGGACAGACAGACCAGTAAACAGCAGTAGCCACAGATACGATCCTCAATCAACAAGGTCA  
AAATGTAATATGTGTTTATGTAGCTATTGGGCAAAAAGCATCTTCTGTGGCCAGGTGTAACCTACTTTACAGGAAAGGG  
GAGCGATGGAATACACTATTTGTGGTAGCCGAAACGGCAGACTCCCTGCTACATTACAATACCTTGTCTTATACAGGA  
CAGACTCTGGCTGAATATTTTATGTATCGTGAACGACACTTTAATCATTATGATGATCCCTCCAACAAGCGCAAGC  
TTATCGCCAAATGTCTCTTCTATTACGAAGACCGCCCGTCTGGAAGCTTATCTAGGAGATGTTTTTTATTTGCATTAC  
GCCTTTTGGAAAGAGCCGCTAAATTAAGTTCTAGTTTGGTGAAGGAAGTATGACCGCCTTACCAATAGTTGAAACCCAA  
TCGGGAGATGTTTTCGGCTTATATTCCTACTAATGTAATTTCCATTACTGATGGACAAATCTTCTTATCCGCCGACCTATT  
CAATTCTGGAATCAGACCTGCTATTAATGTGGGTATCTCCGTTTCCAGAGTGGGGTCCGCAGCTCAAATAAAAGCCATGA  
AACAAGTAGCTGGTAAATTAATAATAGAACTAGCACAATTTCGAGAATTAGAAGCCTTTGCACAATTTGCTTCTGATCTC  
GATAAAGCTACTCAGAATCAATTGGCAAGAGGTCAACGATTACGTGAATTGCTTAAACAATCCCAATCAGCTCCTCTCAC  
GGTAGAAGAGCAGATAATGACTATTTATACCGGAACAAACGGCTATCTTGATTATTAGAAGTTGGACAGGTAAGGAAAT  
TTCTTGTTGAGCTACGTACTTACTTAAAACTAATAAACCTCAGTTCCAAGAAATCATATCTTCTACCAAGACATTTACC  
GAGGAAGCAGAAGCCCTTTTGAAGAAGCTATTAGGAACAAATGGACCGTTTTATA---CTTCAGGAACAAGCA-----  
-----ATGAGAATCAATCCTACTACTTCTGGTTCTGGG-----

GTTTCCACGCTTGAAAAAAAAAACCCGGGGCGTGTCTGTCCAAATCATCGGTCCGGTACTAGATGTAGCCTTTCCCCCGGG  
CAAGATGCCGAATATTTATAACGCTCTGGTAGTTCAAGGTCGAGATAGTGTGGTCAACCAATTAATGTGGCTTGTGAGG  
TACAGCAATTATTAGGAAATAATCGAGTTAGGGCTATAGCTATGAGTGCTACAGAGGGTCTAACGAGAGGAATGGAAGTG  
ATTGACACAGGAGCTCCTATAAGTGTTCGGTTCGGGGGAGCGACTCTGGGACGAATTTTTAACGTGCTCGGAGAACCTGT  
TGATAATTTAGGGCCTGTAGATACTAGTACAACGTCTCCTATTCATAGATCTGCGCCCGCCTTTATACAGTTGGATACAA  
AATTATCTATTTTTGAAACAGGAATTGAAGTAGTAGACTTTTTAGCCCCTTATCGCCGTGGAGGAAAAATCGGACTATTC  
GGGGGAGCTGGAGTGGGTAAAACAGTACTTATTATGGAATTGATTAACAATATTGCTAAAGCTCAGGGGGCGTATCCGT  
ATTTGGCGGAGTGGGTGAACGTACTCGGGAAGGAAATGATCTTTACATGGAATGAAAGAATCTGGAGTAATTAATGAAG  
AAAATATTGCAGAATCAAAAGTAGCCCTAGTTTATGGTCAGATGAATGAACCGCCGGGAGCTCGTATGAGAGTTGGTTTG  
ACTGCCCTAACTATGGCGGAATATTTCCGAGA

Nuphar

-----ATGGAAAA-----TGGTGGTTAAATTCAATGTTGTCT-----  
AATGAGGATTTAGGGCGCAGGTGTGGACTAAGT-----GCGAGT---CTTGGC---CCTATTGGAAATACC-----  
-----AGCGGAAGTGAAGAACCATTACA---AATGATAATGAGAAAAACATTCATAGTTGG-  
--AGTGGT-----AGGGGCAGTTATAGTTAC---  
AGTAATGTTGATTATTTACTCGGCTTGGACGGTGTCAAGGACATTTGGAGTCTCATCTCTGGTGACACTTTTTGGGTT--  
---AGGGATAGTAATGGTGACAGTTATTCCGTATATTTGATATTGAAAATAAGATTTTTGAGATTGAC-----  
-----ACT-----GATAGTTACTTTCTGGGTGAACTAGAA-----  
AGTTTATTTTCTAGTTTATCTG-----AAT--  
-----CTA-----AATAGTGGG-----TCTAAGGATTACAAT---  
CGCTATTATGATCAGTAC-----GTGTATGAT-----ACTAGGCATAGTTGGAAGAATCACATT-----  
AATAGTTGCATTGACAGTTATATT-----CGTTCTGAAACCAATATGGAT---  
AGTTGCATTTGCAATGGTAGCAACAATTCC-----AGCGACAAT-----  
-----TACATTTATAGTTACATTTGT---AGCGATAGT---  
GAA---AGGGGTAGTGACCGT-----GGGAGCTCTAATCTAAAAACT-----  
AGT-----GTTAGTGATTTT-----GGAAGACAT-----  
AGTGATTTA-----GATAGAAAT---CTAAAATACGGACATTTATGGGTTCAATGTGAA-----  
AATTGTTATGGATTGAAT-----TATAAGAAATTTTTTAGTTCAAAAATGAATATTTGT-----  
GAACAATGTGGATACCACTTGAAAATGAGTAGTTTCAAGATAGAATCGAACTTTTGATTGATCCAGGCACCTTGGGATCCT--



--ATG---GAT---GAAAACATGGTCTCTATAGACCCTATT---GAATTTTCAT-----  
-----TCTGAGGAGGAACCT-----

TATAGGGATCGTATCAATTCTTATCAAATAGAGACGGGTTTAGCTGAGGCTGTTCAAACAGGCATAGGCCAACTAAATGG  
TATTCCCATAGCAATTGGGGTTATGGATTTTAAAGTTCATGGGGGGTAGTATGGGATCCGTAGTAGGCGAGAAAATCACCC  
GTTTGATCGAGTATGCTACTGATAGATCTCTCCAGTTATTATGGTGTGTGCTTCTGGAGGAGCGCGCATGCAAGAAGGA  
AGTTTGAGCTTGATGCAAATGGCTAAAATATCTTCTGCTTTATACAACCTAT-----  
CAATCAAATAAAAAGTTATTCTATGTATCAATCCTTACATCCCCACAACCTGGTGGAGTGACAGCCAGTTTTGGTATGTT  
GGGAGATATCATTATTGCCGAACCCAATGCTTACATTGCATTTCGCGGGTAAAAGAGTAATTGAACAAACATTGAAGAAGA  
CAGTACCTGAGGGTTCGCAAGTAGCGGAGTATTCCATAAGGGTTTATTTGATCCAATCGTACCGCGTAATCTTTTA  
AAAGGCGTTCCGAGTGAGTTATTTTCAGTTCATGGTTCTTTCCCCGCCCTTGA-----

-----ATGGTAACC-----  
ATTCGAGCCGAAGAAATTAGTAATATTATCCGCGAACGGATTGAGCAATATAATAGAGAAGTAAAGATTGTGAACACTGG  
CACCGTACTTCAAGTGGGCGACGGCATTGCTCGTATTTCATGGTCTTGATGAAGTAATGGCAGGTGAATTAGTAGAATTTG  
AAGAGGGTACAATAGGTATTGCTCCGAATTTGGAATCAAATAATGTTGGCGTTGTATTAATGGGTGACGGCTTGATGATA  
CAAGAGGGTAGTTCTGTAAAAGCAACAGGACGAATTGCTCAGATACCGGTGAGTGAGGCTTATTTGGGTGCTGTTATAAA  
TGCCCTAGCTAAACCTATTGATGGGAGGGGTGAAATTTTAGCTTCCGAATATCGGTTAATTGAGTCTCCCGCTCCAGGTA  
TTATTTTCGAGACGTTCCGTATATGAGCCTCTTCAAACGGGGCTTATTGCTATTGATTTCGATGATCCCTATAGGACGCGGT  
CAGCGAGAATTAATTATTGGGGACAGACAGACCCGGTAAAACAGCAGTAGCTACAGATACTATTCTCAATCAAAAAGGTCA  
AAATGTAATATGCGTTTTATGTAGCTATTGGTCAAAAAGCATCTTCCGTGGCTCAGGTAGTGACTACTTTCCAGGAACGGG  
GAGCGATGGAATACACTATTGTGGTAGCGGAAACGGCGGATTTCGCTGCTACATTACAATACCTCGCTCCTTATACAGGA  
GCCGCTCTGGCTGAATATTTTATGTACCGTGAACGACATACCTTAATAATTTATGATGATCTCTCAAACAGGCACAAGC  
TTATCGCCAAATGTCTCTTCTATTAAGAAGACCACCCGGTTCGCGAAGCTTATCCAGGAGACGTTTTTTATTTGCATTCCC  
GCCTTTTGGAAAGAGCCGCTAAACCAAGTTCTCGTTTTAGGCGAAGGAAGTATGACTGCTTTACCAATAGTTGAGACTCAA  
TCCGGGGACGTTTTCGGCTTATATTCCCCTAATGTAATTTCCATTACAGATGGGCAAATCTTCTTGTCGCGGATTATT  
CAATGCTGGAATCCGTCCAGCTATTAATGTGGGTATTTCCGTCTCCAGAGTAGGATCCGCAGCTCAAATTAAGCCATGA  
AACAAGTAGCCGGCAAATCAAAATTAGAATTGGCTCAATTTGCAGAGTTAGAAGCCTTTGCGCAATTCGCTTCCGACCTA  
GATAAAGCTACTCAGAATCAATTGGCAAGAGGTCAACGATTACGGGAGTTGCTCAAACAATCCCAATCATCCCCTCTCGC  
GGTGGACGAACAGATAGTTACTATTTATACCGGAACGAATGGATATCTTGATCAATTAGAAATTGGACAGGTAAGGAAAT  
TTCTTGTTTCAGTTACGTACCTATTTAAGAACGAATAAGCCTCAGTTCCAAGAAATCATATCTTCTACCAAGGTATTACC  
GAGCAAGCAGAAGCCATTTTGAAGGAGGCTATTTCAGGAGCAGATCGAACTATTTCTA---CTTCAGGAACAA-----  
-----ATGAGAATCAATCCTACTACTTCTGGTCCCGGT-----GTTTCAACA-----

AAAAATCTGGGACGTATCGCTCAAATCATTGGTCCGGTACTGGATGTAGCTTTTCCCCCGGGGAAGATGCCTAATATTTA  
CAACTCTTTGGTAGTTAAGGGTCGAGATACCGCAGGTGAGGAAATTAATGTGACTTGTGAGGTACAGCAATTATTAGGAA  
ATAATCGAGTTAGAGCTGTAGCTATGAGTGCTACAGATGGGCTGATGAGAGGAATGGAAGTGATTGACACGGGAGCTCCT  
CTAAGTGTTCAGTCGGTGGAGCCACTCTAGGACGAATTTTCAATGTTCTTGGAGAACCTGTTGATAATTTAGGTCCTGT  
AGATACTCGCACAACTCTCCTATTATAGATCCGCACCCGCTTTTATACAGTTAGATACCAAATTAATCAATCTTTGAAA  
CGGGCATTAAAGTGGTGGATCTTTTAGCGCCTTATCGGCGTGGGGGAAAAATCGGACTATTCGGGGGAGCCGGAGTGGGT  
AAAACAGTACTCATCATGGAATTAATCAACAACATTGCCAAAGCTCATGGGGGTGTATCTGTATTTCGGCGGAGTAGGAGA  
ACGCACTCGTGAAGGAAATGATCTTTACATGGAAATGAAAGAATCCGGGGTGATTAATGAAGAAAATATTGCAGAATCCA  
AAGTAGCTCTAGTATATGGACAGATGAATGAACCGCCGGGAGCTCGTATGAGAGTCGGTTTTGACTGCCCTAACCATGGCG  
GAATATTTCCGTGA

Nymphaea

-----ATGAAAAA-----TGGTGGTTAAATTCAATGTTGTCT-----  
AATGAGGATTTAGGGCGCAGGTGTGGACTAAGTGCGAGT-----CTTGGC---CCTATTGGAAATACC-----  
-----AGCGGGAGTGAAGAACCATTATA---AATGATAGTGAGAAAAACGTTAATAGTTGG-  
--AGTGGT-----AGGGGCAGTTATAGTTGC---  
AGTAATGTTGATTATTTATTCAACTTGGGCGGTGTCAAGGACGTTTGGAGTCTCATCTCTGGTGAGACTTTTTGGGTT--  
----AGGGATAGTAATGGTGACAGTTATTCCATATATTTTCGATATTGAAAATAAGATTTTTGAGATTGAC-----

-----ACT-----GATAGTTACTTTCTGGGTGAACTAGAA-----  
AGTTTATTTTCTAGTTATCTG-----AAT--

-----CTA-----AATAATGGG-----TCTAAGAGTTACAAT---  
CGCTATTATGATCATTAC-----GTGTATGAT-----ACTAGGCATAGTTGGAAGAGTCACATA-----  
AATAGTTGCATTGACAGTTATATT-----CGTTCTGAAACCAATATGGAT---  
AGTTGCATTCCAAATGGTAGCAACAATTCA-----AGTGACAAT-----  
-----TACATTTATAGTTACATTTGT---AGCGATAGT---  
GAA---AGGGGTAGTGACCGT-----GGGAGTTCCAATCTAAAAACT-----  
AGT-----GGTGTTAGTGAC---AGTGATTTGGAAGACAT-----  
AATGATTTA-----GATAGAAAT---AAAAGATACAGACATTTATGGGTTCAATGTGAA-----  
AATTGTTATGGATTAAAT-----TATAAGAAATTTTTAGTTCAAAAATGAATATTTGT-----  
GAACAATGTGGATACCACTTGAAAATGAGTAGTTTCAGATAGAATCGAACTTTTGATTGATCCAGGCACCTGGGACCCT--  
-ATG---GAT---GAAAACATGGTCTCTATGGACCCTATT---GAATTTTCAT-----  
-----TCTGAGGAGGACCCT-----

TATAGGGATCGTATCAATTCTTATCAAATAGAGACGGGTTTAGCTGAGGCTGTTCAAACAGGCATAGGCCAACTAAATGG  
TATTCCTATAGCAATTGGTGTATGGATTTTTAAGTTTCATGGGGGGTAGTATGGGATCCGTAGTAGGCGAGAAAATCACAC  
GTTTGATCGAGTATGCTACTGATAGATCTCTCCAGTTATTATGGTGTGTGCTTCTGGAGGAGCGCGCATGCAAGAAGGA  
AGTTTGAGCTTGATGCAAATGGCTAAAATATCTTCCGCTTTATAACAATTAT-----  
CAATCAAATAAAAAAGTTATTCTATGTATCAATCCTTACATCCCCTACAACCTGGTGGAGTGACAGCCAGTTTTGGTATGTT  
GGGAGATATCATTATTGCCGAACCCAATGCTTACATTGCATTTCGCGGGTAAAAGAGTAATTGAACAAACATTGAAGAAGA  
CAGTACCTGAGGGTTCGCAAGTAGCGGAGTATTTATTCAATAAGGGTTTTATTTGATCCAATCGTACCAGCGTAATCTTTTA  
AAAGGTGTTCCGAGTGAGTTATTTTCAGTTCATGGTTTTCTTTCCCGCCCTTGA-----  
-----ATGGTAACC-----

ATTCGAGCCGAAGAAATTAGTAATATTATCCGCGAACGGATTGAGCAATATAATAGAGAAGTAAAGATTGTGAACACTGG  
TACCGTACTTCAAGTGGGCGACGGCATTGCTCGTATTCATGGTCTTGATGAAGTAATGGCAGGTGAATTAGTAGAGTTTG  
CAGAGGGTACGATAGGTATTGCTCTTAATTTGGAATCAAATAATGTTGGCGTTGTATTAATGGGTGACGGTTTTGATGATA  
CAAGAGGGTAGTTCGGTGAAGCAACAGGACGAATTGCTCAGATACCGGTGAGTGAGGCTTATTTGGGTGCTGTTATAAA  
TGCCCTAGCTAAACCTATTGATGGGAGGGGTGAAATTTTAGCTTCCGAATATCGGTTAATTGAGTCTCCCGTCCAGGTA  
TTATTTGAGACGTTCCGTATATGAGCCTCTTCAAACGGGGCTTATTGCTATTGATTTCGATGATCCCTATAGGACGCGGT  
CAGCGGAATTAATTATCGGGGACAGACAGACCCGTAACAGCAGTAGCTACAGATACTATTCTCAATCAAAAAGGTCA  
AAATGTAATATGCGTTTTATGTAGCTATTGGTCAAAAAGCATCTTCCGTGGCCAGGTAGTGACTACTTTCCAGGAACGGG  
GAGCAATGGAATACACCATTGTGGTAGCGGAAACAGCGGATTTCGCTGCTACATTACAATACCTCGCTCCTTATACAGGA  
GCCGCTCTGGCTGAATATTTTATGTACCGTCAACGACATACCTTAATAATTTATGATGATCTCTCCAAACAAGCACAAGC  
TTATCGCCAAATGTCCCTTCTATTAAGAAGACCACCCGGTCGCGAAGCTTATCCAGGAGACGTTTTTTATTTGCATTCCC  
GCCTTTTGAAAGAGCCGCTAAACCAAGTTCTCGTTTTAGGCGAAGGAAGTATGACTGCTTTACCAATAGTTGAGACTCAA  
TCTGGGACGTTTTCGCTTATATTCCCCTAATGTAATTTCCATTACAGATGGGCAAATCTTCTTATCCGCGGATTTATT  
CAATGCTGGAATCCGTCCAGCTATTAATGTGGGTATTTCCGTCTCCAGAGTAGGATCCGCAGCTCAAATTAAGCCATGA  
AACAAGTAGCCGCAAAATTAATAATGAAATGGCTCAATTTGCAGAGTTAGAAGCCTTTGCACAATTCGCTTCCGATCTA  
GATAAAGCTACTCAGAATCAATTGGCAAGAGGTCAACGATTACGGGAGTTGCTCAAACAATCCAATCATCCCCTCTCGC  
GGTGGATGAACAGATAGTTACTATTTATACCGGAACGAATGGATATCTTGATCAATTAGAAATTGGACAGGTAAAGAAAT  
TTATTGTTTCAGTTACGTACCCATTTAAGAACGAATAAGCCTCAGTTCCAAGAAATCATATCTTCTACCAAGGTATTACC  
GAGCAAGCGGAAGCCCTTTTGAAAGAGGCTATTTCAGGAGCAGATGGAACATTTCTA---CTTCAGGAACAAACA-----  
-----ATGAGAATAAATCCTACTACTTCTGGTCTCGGA-----

GTTTCAACACTTGTGGAAAAAATCAGGGACGTATCGCTCAAATCATCGGTCCAGTACTGGATGTAGCTTTTCCCCGGG  
GAAGATGCCTAATATTTACAACCTCTTGGTAGTTAAGGGTCGAGATACCGCAGGTGAGGAAATTAATGTGACTTGTGAGG  
TACAGCAATTTAGGAAATAATCGAGTTAGAGCTGTAGCTATGAGTGCTACAGATGGGCTGACGAGAGGAATGGAAGTG  
ATTGACACGGGAGCTCCTCTAAGTGTTCAGTCCGTGGTAGGCCACTCTAGGACGAATTTTCAATGTTCTTGAGAACCTGT  
TGATAATTTAGTCTGTAGATACTCGCACAAACATCTCTATTTCATAGAGCCGCACCCGCTTTTACACAATTAGATACCA  
AATTATCAATCTTTGAAACGGGCATTAAGTGGTGGATCTTTTAGCGCTTATCGGCGTGGGGGAAAAATCGGACTATTC  
GGGGGAGCCGGAGTGGGGAAAAACAGTACTCATCATGGAATTAATCAACAACATTGCCAAAGCTCATGGGGGTGATCCGT  
ATTCGGCGGAGTAGGAGAACGCACCTCGTGAAGGAAATGATCTTTACATGGAAATGAAAGAATCCGGGGTGATTAATGAAG  
AAAATATTGCAGAATCTAAAGTAGCTCTAGTATATGGACAGATGAATGAACCGCCGGGAGCTCGTATGAGAGTCCGTTTTG  
ACTGCCCTAACCATGGCGGAATATTTCCGTGA

Oenothera

ATGGGATTTTTCGTAATCAATTATGACGATGAGTATGAGGAAGACCCTTGAATATGACGATGAGTATGAGGAAGACCTTGA  
ATATGACGATGAGTATGAGGAAGACCTTGAATATGACGATGAGGAATATGACGATGAGTATGAGGAAGACCTTGAAGGGG  
ATAATAAGCCTCATAAGGAAGACCTTGAAGGGGATAATAAGCCTCATAAGGAAGACCTTGAAGGGGATAATAAGCCTCAT  
AAGGAAGACCTTGAAGGGGATAAGCAGAAGGAAGAAGAGGAGAAGCAGAAGGAAGAAGAGGAGAAGCTGAAGGACTGTCC

CTGGCACTGGTTTTACCAGATTTACCCTAAGCATTGGGGCTGTCCCCACCGTAAGCATCGGGATCGCAAGTCGGTTCCCG  
CTAAGGAGCGCGAGTTGGTTCCCGCTCAGTCTACCAAGCGGGATACCGATCCGGATTCCGAGGCGTCTCTAAAATCGAAC

TATGCGCATTTATGGGTTCACTGCAAA-----CTTTGTTCTGGATTCAAT-----  
TATAAGAAAATTTGAAGTCCAAAAACAATGTTTGT-----  
GAACAATGTGGATCTCATTGAAAATGCATAGTTTCAGATCGAATCGACCTTATGCTTGATCCAAAGACTTGGGCTCCT--  
-ATG---CAT---GAAGGCTGCTTTCTCTAGATCCTATT---GAATTCAT-----  
-----TCGGAGAAAGACCCT-----

TATAAAGATCGGGTTGCTTCTTATAAAAAGAAAGACAGGATTATCGGAAGCTATTCAAACGGGCAGAGGTTACCTAAAACG  
TATTCACCTAGGAATTGGACTTATGGATTTTCAGTTTATGGGGGTAGTATGGGATCCGTAGTCGGCGAGAGAATCACCC  
GTTTGGTCGAGTATGCTACCAATCGAGTTTACCTCTTATTCTAGTGTGTGCTTCCGGAGGGGCACGTATGCAAGAAGGG  
AGTTTGAGCTTGATGCAAATGGCTAAAATATCTTCTGCTTTATCTGATTAT-----  
CAATTCATAGAACGGTATTCTATGTAGCTCTCCTTACATCTCCACTACGGGTGGTGTGACGGCTAGCTTTGGGATGTT  
GGGGATATCATTCTTGAGAACCTAATGCCTACATCGCATTTCGAGGTAAAAGAGTAATTGAACAAACATTGAATATTG  
AAGTACCTGAGGGTTCACAAACGGCTGAATATTTATTCGATAAGGGCTTATTCGATCAAATTGTACCACGCAATCCTTTA  
AAGGGTCTTTGAGTGAATTTAATTTTACGGTTTTGTTACTTTGAATTCTCAAGTAATTAATATTTATAATTTATTT  
GTATAGTTAG-----ATGGCAACC-----

ATTAGAGCCGACGAAATTAGTAATATTATCCGTGAACGGATTGAGCAATATAATAGAGAAGTAAAGATTGTAAATACTGG  
TACCGTACTTCAAGTTGGTGACGGCATTGCTCGTATTTATGGTCTTGATGAAGTAATGGCAGGCGAATTAGTAGAATTTG  
AAGAGGGTACAATCGGCATTGCTCTTAATTTGGAATCAAAAAATGTTGGTGTGTTATTAATGGGTGACGGTTTTACTGATA  
CAAGAGGGAAGTTCTGTAAGCAACAGGAAGAATTGCTCAGATACCCGTGAGTGAGGCTTATTTGGGTCGTGTTATAAA  
TGCCCTGGCAAAACCTATTGATGGTCGAGGTGAAATTTCTTCTCTGAGTCTCGGTTAATTGAATCTCCCGCTCCGGGTA  
TTATTTGAGACGTTCCGTATATGAGCCTCTTCAAACAGGACTTATTGCTATTGATGCAATGATCCCTATAGGACGTGGC  
CAGCGAGAATTAATTATTGGAGACAGACAGACTGGTAAAACAGCAGTAGCCACGGATACGATTCTCAATCAACAAGGGAA  
CAATGTGATATGTGTTTATGTAGCTATTGGTCAAAAAGCCTCTTCTGTGGCTCAGGTAGTGAATGCTCTCCAAGAAAGGG  
GAGCTATGGAATACACTATTGTGGTAGCGGAAGCGGCCGATTCCCCAGCTACATTACAATACCTCGCCCCCTTATACAGGA  
GCAGCTCTGGCTGAATATTTTATGTACCGTGAACGACACACTTTAATCATTATGATGATCCCTCCAACAAGCACAGGC  
TTATCGCCAAATGTCTCTTCTATTACGAAGACCTCCCGGTGCGGAAGCTTATCCGGGAGATGTTTTTTATTTGCATTAC  
GCCTTTTGGAAAGAGCCGCTAAATTAAGTTCTCGTTTAGGTGAAGGAAGTATGACTGCCTTACCAATAGTTGAGACTCAA  
TCGGGAGATGTTTCGGCTTATATTCCTACTAATGTAATTTCCATTACAGACGGACAAATCTTCTTATCGGCCGATCTATT  
CAATGCTGGAATCAGACCCGCGATTAATGTGGGCATTTCTGGCTCCAGAGTAGGATCCGCAGCTCAAATTAAGCCATGA  
AACAAGTAGCTGAAAAATTAATTTGAAATTTGGCGCAATTCGCAGAATTAGAAGCCTTTGCACAATTTCTCTCTGATCTC  
GATAAAGCTACCCAGAATCAATTGGCAAGAGGTCAACGATTACGTGAGTTGCTTAAACAATCTCAAGCAAAACCTCTCAC  
CGTGGCAGAACAGATACTGACTATTTATACTGGGACGAATGGTTATCTTGATTATTTCGAAATTGCACAGGTAAGGAAAT  
TTCTTGATGAGCTACGTGATTACGTAAAACGAGGAAACCGCAGTTTCAAGAAATCATATCTTCTACTAAGATATTCACC  
GAGGAAGCACAAGCCCTTTTGAAGACGCTATTTCATGAACAGAAGGAACCTTTTCTA---GTTTCAGGAA-----  
-----ATGAGAATCAATCCTACTACTTCAGGTCCTGGA-----

GTTTCCACACTTGAAAAAAAAAAATCGGGCCGTATCGCTCAAATCATTGGTCCAGTACTGGATGTAACCTTTCCCCGGG  
GAAGATGCCTAATATTTATAACGCTCTGGTCTGTTAAAGGTGAGATACTGGCGCCAAGAAATTAATGTCACCTTGTGAAG  
TACAGCAATTATTAGGAAATAATCGTGTTAGAGCTGTCGCCATGAGTGCTACAGATGGTCTAACGAGAGGAATGGAAGTG  
ATTGACACGGGAGCTCCTCTAAGTGTTCCAGTGGCGAAGCGACTCTAGGACGAATTTTCAACGTGCTCGGAGAGCTTGT  
TGATGAATTAGGACCCGTAGATACTCGTACAACATCTCCTATTTCATAGATCCGCGACCGCCTTTATACAGTTAGATATCG

AATTATCTATTTTTGAAACAGGAATTAAGTAGTCGATCTTTTAGCCCCAAATCGCCGTGGAGGAAAAATAGGCCTATTC  
GGGGGGGCTGGGGTAGGTAAAACAGTCCTCATTATGGAATTGATCAACAACATTGCTAAAGCTCACGGGGGTGTATCCGT  
ATTTGGCGGAGTAGGTGAACGTACTCGTGAAGGAAATGATCTTTACATGGAAATGAAGGAATCCGGCGTCATTAACGAAC  
AAAATATTGCAGAATCGAAGGTGGCTCTAGTCTATGGTCAGATGAATGAACCCCCAGGAGCTCGTATGAGAGTTGGTTTG  
ACTGCGGTTTCGTGTGGCGGACTATTTCCGAGA

Oryza

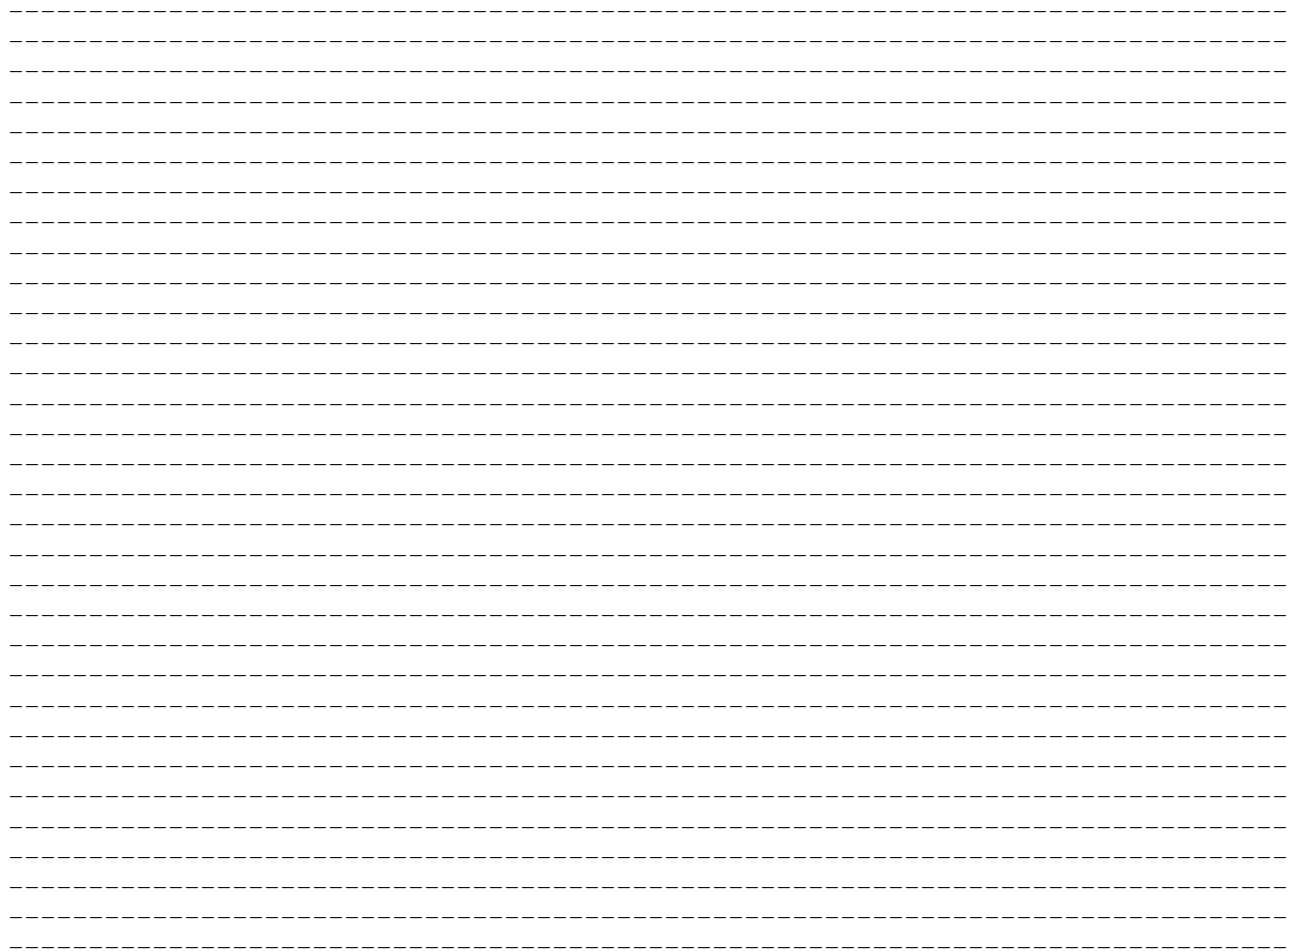

-----ATGGCAACC-----

CTTCGAGTCGACGAAATTCATAAAATTCTCCGCGAACGTATTGAACAATATAATAGAAAAGTAGGGATTGAGAATATCGG  
TCGCGTAGTTCAGTGGGGGATGGGATTGCTCGTATTATAGGTCTTGGTGAAATAATGTCAGGCGAATTAGTCGAATTTG  
CAGAAGGGACTAGGGGATTGCTCTGAATTTGGAATCCAAAAATGTTGGGATTGTATTAATGGGCGATGGGTTGATGATA  
CAAGAGGGCAGTTTTGTAAAAGCAACAGGAAGAATTGCTCAGATACCCGTGAGCGAGGCTTACTTGGGTCGTGTTATAAA  
TGCTCTGGCTAAACCTATTGATGGGAGAGGCGAAATTGTAGCTTCCGAATCTCGCTTAATTGAATCTCCTGCTCCGGGTA  
TAATTTCCAGGCGTTCTGTATATGAACCCCTTCAAACGGGGCTTATTGCTATCGATTCGATGATTCCTATTGGGCGCGGT  
CAGCGAGAGTTAATTATTGGGGACAGACAAACCGGCAAAACAGCAGTAGCTACAGATAACAATTCTCAATCAAAAAGGGCA  
AGATGTAATATGTGTTTTATGTAGCTATCGGTCAAAGAGCATCCTCCGTAGCTCAAGTAGTAACACTTTCCATGAAGAGG  
GGGCCATGGAATACACTATTGTAGTAGCTGAAATGGCGGATTCCCCTGCTACATTACAATACCTCGCTCCTTATACGGGA  
GCAGCCCTGGCTGAGTATTTTATGTACCGCGAACCGGCATACTTTAATAATTTATGATGATCTCTCCAAACAGGCACAAGC  
TTATCGCCAAATGTCCCTTCTATTAAGAAGACCCCCGGCCGCGAAGCTTACCCAGGGGATGTTTTTTTATTTGCATTCAC  
GCCTTTTAGAAAGAGCCGCTAAATTAATTTCTCTTTTAGGGGAAGGAAGTATGACTGCTTTACCAATAGTTGAGACTCAA  
TCTGGAGACGTTTTCCGCCTATATTCCTACTAATGTAATCTCCATTACAGATGGACAAATATTCTTATCCGCAGATCTATT  
CAATGCCGGAATTCGGCCTGCTATTAATGTGGGTTTTCGTTTCCAGAGTAGGATCCGCGGCTCAAATTAAGCCATGA  
AACAAGTAGCTGGCAAATCAAAATTTGGAATTAGCTCAATTCCGCGGAGTTACAAGCCTTTGCACAATTCGCCTCTGCTCTC  
GATAAAACAAGTCAGAATCAATTGGCAAGGGCCGACGATTACGAGAATTGCTTAAACAATCCAAGCAAATCCTCTTTCC  
AGTGGAAAGAGCAGATAGCTACTATTTATATCGGAACAAGAGGATATCTTGATTCTTTAGAAATTTGGACAGGTAAAGAAAT  
TTCTGGATGAGTTACGTAAACACCTAAAAGATACTAAACCTCAATCCAAGAAATTATATCTTCTAGCAAGACATTCACC

GAGGAAGCGGAAATCCTTTTGAAGGAAGCTATTTCAGGAACAACCTCGAACGGTTTTCC---CTTCAGGAACAAACA-----  
-----ATGAGAACCAATCCTACTACTTCTCGTCCCGGG-----  
GTTTCTACAATTGAAGAAAAAAGTACAGGGCGTATCGATCAAATTATTGGACCCGTGCTGGATGTCACTTTTCCCGGGG  
CAAGTTACCTTATATTTATAATGCTTTGGTAGTCAAGAGTTCGAGACACTGACGGTAAGCAAATTAATGTAACCTTGTGAGG  
TACAACAATTATTAGGAAATAATCGAGTTAGAGCTGTAGCTATGAGTGTACAGATGGGTTGATGAGAGGAATGGAAGTG  
ATTGACACGGGAGCTCCTCTCAGTGTTCCTGTCCGGTGGAGCTACTCTTGGACGAATTTTCAACGTTCTTGGGGAGCCTGT  
TGACAATTTGGGTCCTGTAGATACTAGTGCAACATTCCCTATTCATAGATCCGCGCCCGCCTTTATCGAGTTAGATACGA  
AATTATCCATCTTTGAACTGGTATTAAGGTGGTCGATCTTTTAGCTCCTTATCGGCGTGGAGGAAAAATCGGACTATTT  
GGGGGAGCTGGAGTAGGTAAAACAGTACTCATCATGGAATTAATCAACAATATTGCTAAAGCTCACGGGGGCGTATCCGT  
ATTTGGCGGAGTAGGGGAACGGACTCGTGAAGGAAATGATCTTTATATGGAAATGAAGGAATCTGGAGTAATTAATGAAA  
AAAATCTTGAGGAATCAAAGGTAGCTCTAGTCTATGGCCAAATGAATGAACCGCCAGGAGCTCGTATGAGAGTTGGTTTG  
ACTGCCCTAACTATGGCAGAATATTTCCGAGA

Panax

ATGACTATTCATCTATTGGATTTTCATACAAATAGGGGGCAAGAAAACCTCTATGGAAAGA-----  
TGGTGGTTCAATTCGATACTGTTT-----AAGAAGGAGTTCGAACACAGGTGTGGGCTAAGTAAATCAACGGGTAGT--  
-CTTGGT---CCTATTGAAAATACC-----AGTGAAAGTGAAGATCCGAATATT---  
AATGATATGAAGAAAAATATTCATAGTTGG---GGGGGT-----CGTGACAATTCGAATTAC---  
AGTAATGTTGATCATTATTC-----GGCGTCAAGGACATTCGGAATTTTCATCTCTGATGAAACTTTTTTAGTT--  
----AGGGATAGTAATGGGAACAGTTATTCCATATATTTTGATATTGAAAATCATATTTTTCGAGATTGAC-----

-----AAT-----GGTCATTCTTTTCAGAGTGAAGTAGAA-----  
AGTTCTTTTTTATAGTTATCAG-----  
AATTCTAGTTAT---CGG-----AATAATGGA-----TCTAACAGTGACGAT---  
CCCCACTATGATCATTAC-----ATGTATGAT-----ACTCAATATAGTTGGAATAATAACATT-----  
AATAGTTGCATTGACAATTATCTT-----CAGTCTCAAATCTTTATTGAG---  
ACTGACATTGTAAGTGGTAGTGACAATTAC-----AGTAACAGT-----  
-----TACATTTATAGTTCCATTTGT---GGTGAGATT---  
-----GCGGGTCCGGTATAAGAACC-----  
AGAACGGAT-----GGTAGTGATTTA---ACTATAAGAGAAAGTTCT-----  
AATGATCTG-----GATGTAAC---CAAAAATACAGGCATTTGTGGGTTCAATGTGAA-----  
AATTGTTATGGATTAAT-----TATAAGAAATCTTTTAAATCAAAAATGAATCTTTGT-----  
GAACAATGTGGATATCATTGAAAATGAGTAGTTCAGATAGAATCGAACTTTTGATCGATCCGGGTACTTGGGATCCT--  
-ATG---GAT---GAAGACATGGTTTCTCTGGATCCCATT---GAATTTTCAT-----  
-----TCGGAGGAGGAGCCT-----

TATAAAGATCGTGTGATTCTTATCAAAGAAAGACAGGATTAACCTGAGGCCGTTCAAACAGGCATAGGCCAACTAAACAG  
TATTCCTCGTAGCAATCGGGGTTATGGATTTTCAGTTTATGGGGGGTAGTATGGGATCCGTGGTCCGGGGAGAAAATCACCC  
GTTTGATTGAGTACGCTACTAAAAAATTTCTACCTCTTATTATAGTGTGTGCTTCCGGGGGGGCACGCATGCAAGAAGGA  
AGTTTGAGCTTGATGCAAAATGGCTAAAATATCTTCTGCTTTATATGATTAT-----  
CAATCAAATAAAAAGTTATTCTATGTACCAATCCTTACATCTCCTACTACAGGTGGGGTACTGCTAGTTTTGGTATGTT  
GGGGGATATCATTATTGCCGAACCCAATGCCTACATTGCATTTGCGGGTAAAAGAGTAATTGAACAAACATTGAATAAAA  
CAGTACCTGAAGGTTCAAGCGGCTGAATATTTTATCCAGAAGGGCTTATTTGATCTAATCGTACCACGTAATCCTTTA  
AAAAGCGTTCTGAGTGAGTTATTTTCAGCTCCAGCTTTCTTTCTTTTGAATCAAATAA-----  
-----ATGGTAACC-----  
ATTCGAGCCGACGAAATTAGTAATATTATCCGTGAACGTATTGAGCAATATAATAGAGAAGTAAAGATTGTAAATACCGG  
TACCGTACTGCAAGTAGGCGACGGCATTGCTCGTATTCATGGTCTTGATGAAGTAATGGCGGGTGAATTAGTAGAATTTG  
AAGAGGGTACGGTAGGGATTGCTCTGAATTTGGAATCAAATAATGTCCGGTGTGTTATTAATGGGCGATGGTTTGTGATA  
CAAGAAGGAAGTTCTGTAAAAGCAACAGGAAGAATTGCTCAGATACCCGTGAGTGAGGCCTATTTGGGTCGTGTTGTAAA  
TGCCCTGGCTAAACCTATTGATGGTAGAGGTGAAATTTTCAGCTTCTGAATATCGGTTAATTGAATCTCCCGCTCCAGGTA  
TTATTTACAGACGTTTCAGTATACGAGCCTCTTCAAACGGGGCTTATTGCTATTGATTCTATGATCCCTATAGGACGTGGT  
CAGCGAGAATTAATTATTGGGGACAGACAGACCGGTAAAACAGCAGTAGCAACAGATACGATTCTCAATCAACAAGGCCA  
AAATGTAATATGTGTTTATGTAGCTATTGGTCAAAAAGCATCTTCTGTGGCTCAGGTAGTGACTACTTTCCAGGAAAGGG



TACCGTACTTCAAGTAGGTGACGGTATTGCTCGTATTTATGGTCTTAATGAAGTAATGGCAGGTGAATTAGTAGAATTTG  
AAGAAGGTACGATAGGCATTGCTCTGAATTTGGAATCAAATAACGTTGGTGTGTATTAATGGGTGCTGGTTTTGATGATA  
CAAGAAGGAAGCTCTGTAAAAGCAACAGGAAGAATTGTCCAGATACCAGTGAGTGAAGCTTATTTGGGTGCGGTTATAAA  
TGCCCTGGCTAAACCTATTGATGGTTCGAGGCGGAATTTTCAGCTTCTGAATCTCGGTTAATTGAATCTCCTGCTCCGGGTA  
TTATTTTCGAGACGTTCTGTATATGAGCCTCTTCAAACAGGACTTATTGCTATTGATTTCGATGATTCTATAGGACGTGGT  
CAGCGAGAATTAATTATTGGGGACAGACAGACTGGTAAAACAGCAGTAGCTACGGATACGATTCTCAATCAACAAGGAAA  
AAATGTAATATGTGTTTATGTAGCTATTGGTCAAAAAGCATCTTCAGTGGCTCAGGTAGTGACTACTTTTCAGGAAAAGG  
GAGCCATGGAATATACTATTGTGGTTCGCCGAAACGGCGGCTTCACCCGCTACATTACAATACCTCGCCCCTTATACAGGT  
GCGGCTCTGGCTGAATTTTTTATGTACCGTGAACGGCACACTTTAATCATTATGATGATCTCTCAAAAACAAGCACAGGC  
TTATCGCCAAATGTCTCTTCTATTACGAAGACCGCCTGGGCGCGAAGCTTATCCGGGAGATGTTTTTATTTGTCATTAC  
GTCTTTTGGAAAGAGCCGCTAAATCAAGTTCGAGTTTGGGTGAGGGAAGTATGACTGCTTTACCAATAGTGGAGACTCAG  
TCAGGAGATGTTTTCGGCTTATATTTCTACTAATGTCAATTTCCATTACAGACGGGCAGATATTCTTATCCGCCGACTTATT  
CAACTCTGGAATCCGGCCTGTATTAATGTGGGTATTTCCGTCTCCAGGGTAGGATCCGCAGCTCAAATTAAGCCATGA  
AACAGTAGCCGGCAAATCAAATTTGGACTTGGCGCAATTCACAGAATTAGAGGCCTTTGCACAATTCGCCACTGATCTC  
GATAAACTACTCAGAGTCAATTAGCAAGAGGTTCGACGATTACGTGAGTTGCTCAAACAATCCCAAGCAGACCCTCTCGC  
GGTCGAAGAGCAGATAATGACTGTTTATACTGGAATAAACGGTTATCTTGACTCATTAGAAATCGGACAGGTAAGGAAGT  
TTCTTGAGGATTTGCGTAAATATTTAAAAGGGAATAAACCTAAGTTCCAAGAAATCATATCGTCTACCAAGACATTACC  
GAAGAAGCCGAAGCCCTTTTGAAGAGGCAATTCAGGAACAGACAGAACTCTTTATA---CTTAAGGAACAGGGGTAA---  
-----ATGAGACTCAACCCTACTGCTTCTAGTCCTGGG-----  
GATTCCACGCTTCAAAAAAAAAAAGCTAGGGCGTATCGTCAAATCATTGGTCCGGTATTGGATGTAGCGTTTTCCCGGGG  
CAAGATGCCCTATATTTATAACGCGCTAGTAGTTTCAGGGTCGAGATACTGTCCGGTCAACAAATTCATGTGACTTGCAGG  
TACAACAATTATTAGGAAATAATCGAGTTAGAGCTGTAGCTATGAGTGCTACAGATGGTCTAATGAGAGGAATGGAAGTG  
ATTGACACGGGAGCTCCGCTGAGTGTTCAGTCCGGTGGAGCGACTCTAGGACGAATTTTCAACGTACTGGGAGAGCCTGT  
TGATAATTTAGGCCCTGTAGATAATCGGACAACATCCCCTATTCATAAATCTCCGCTGCTTTTTATTGAGTTAGATACAA  
AATTATCCATTTTTGAAACAGGAATTAAGTAGTGGATCTTTTAGCCCCTTATCGCCGTGGAGGAAAAATTGGATTATTC  
GGAGGGGCTGGAGTGGGTAAAACAGTACTCATTATGGAATTGATCAATAACATTGCCAAAGCTCACGGAGGTGTATCCGT  
ATTTGGCGGAGTAGGTGAGCGTACTCGTGAAGGAAATGATCTTTACATGGAAATGAAAGAGTCTGGCGTAATTAATGAAC  
AAAAGTTGCGGAATCAAAGTAGCTCTAGTCTACGGTCAGATGAATGAACCGCCGGGAGCTCGTATGAGGGTTGGTTTTG  
ACTGCCCTAACTATGGCAGAATATTTCCGTGA

Phalaenopsis

-----ATGAAAAA-----TATTGGTTCAATTCATGTTGTCT-----  
AACAAAGAGTTAGAACAGAAGTGTGGACTAAGTAAATCAATGGATGGT---CTTGAT---GCTCTTGACATAACC-----  
-----AGTGGAAGTGAAGAACTATTCGA---AAAGATGCGGATAAAAAGATTCTAGTTGG-  
-----GAC-----AGTTATAGTTTTAGTAAATATTCATTATCTAAATTTCTTTATTT-----  
GATAGGAGGAATCTTTGGAGTTTGATCTCTGATCATACGTTTTTTAGTT-----  
AGAAATAGTAATGGTGACACTTATTCTGTATATTTTGATATTGAAATCAGATTTTTTGATATTGAC-----  
-----AAT-----GCT-----  
AGTTCTTTTTTGAGTGAECTA-----  
CCTAGTTAT---TTG-----AAAAGTGGG-----  
TCTAATAATAGTAATTACTACTATTCTTATTATTC-----ATGTATGAT-----  
ACTCAATCTAATTGGAATAATCACATT-----AATAGTTGCATTGATAGTTATCTT-----  
CGCTTTGAAATCAGTCTTAAT---AGTGACATTTACAGTGATATCGAC-----AGT-----  
-----  
TACATTTCTAGTTTCATTTGT---ACGAAAGT---ACA---  
AGTAGTATTGAAAATTGTACGAAAGTACAAGTAGTATTGAAAATGGAAATTCTAGTATCAAACT-----AGT-----  
-----AGCAGTTATTTT---AATAGAATAGAAAAATCT-----AATGATTTT-----  
---GATCTAAAT---ACAAAATACAAACAGTTATGGGTTCAATGTGAA-----AATTGTTATGGATTAAT-----  
TATAAAAAATTTTTTAGTTCAAAAATGAATATTTGT-----  
GAATACTGCGGATATCATTGAAAATGAGTAGTTTCAGATAGAATTGAACTCTTTATAGATCCTGGCACTTGGGAACCT--  
-ATG---GAT---GAAGATATGGTCTCTATAGACCCCAT---GAATTTTCA-----  
TCAATAGACCCCATGAATTTTCAATTCAGAGGAGGAACCT-----

-----  
TATATAGATCGCATTTCCTTTTTATCAAACAAAAACGGGTTTAACTGAAGCTGTTCAAACGGGCGTAGGTCAACTAAACAG  
TATTCCCATAGCAATTGGAGTTATGGATTTTCAGTTTATGGGAGGTAGTATGGGATCCGTAGTAGGTGAGAAAATCACCC  
GTTTGATCGAGTATGCTACTAATCGATCTCTACCTGTCATTATTGTGTGTGCTTCTGGAGGAGCACGCATGCAAGAAGGG  
GCTTTGAGCTTAATGCAAATGGCTAAAATATCTTCTGCTTCATATGATTAT-----  
CAATCAAATAAAAAAGTTATTTTTTGTATCAATCCTTACATCTCCTACAACCTGGCGGAGTTACAGCAAGTTTTGGTATGTT  
GGGAGATATCATTATTGCTGAACCTAATGCCTACATTGCGTTTTCGGGGTAAAAGAGTAATTGAACAAACATTGAAAAAGA  
CAGTACCCGACGGTTTACAAGTGGCTGAGTATTTATTCCATAAGGGCTTATTTCGACCCAATTGTACCACGTAATCCTTTA  
AAAGGTGTTCTGAATGAGTTATTTTCAGCTACACGGTTTCCTTCCCTTGAATCAAGATTAA-----

-----ATGGGAACC-----

CTTCGAGCTGACGAAATTAGTAATATTATACGAGAACGTATTGAACAATATAATAGAGAAGTAAAGATTGTGAATACCGG  
TACCGTACTTCAAGTGGGCGATGGGATTGCTCGTATTTCATGGTCTTGATGAAGTAATGGCAGGTGAATTAATAGAATTTG  
AAGAGGGTACCATAGGTATTGCTCTGAATTTGGAATCAAATAATGTTGGCGTTGTATTAATGGGTGATGGTTTTAATGATA  
AAAGAGGGGAAGTCTGTAAAAGCAACAGGAAGAATTGCTCAGATCCCTGTGAGCGAGGCTTTTTTGGGTCTGTATTATAAA  
TGCTCTGGCTAAACCTATTGATGGGAGAGGTGAAATTTTCATCTTCTGAATCTCGGTTAATTGAATCTCCTGCCCCAGGTA  
TTATTTTCGAGACGTTCCGTATATGAGCCCCTTCAAACGGGACTTATTGCTATTGATTCAATGATCCCTATAGGACGTGGG  
CAGCGAGAATTAATTATTGGAGACAGGCAGACTGGTAAAACAGCAGTAGCCACAGATAACAATTTCTCAATCAAAAAGGACA  
AAATGTGATATGTGTTTTATGTAGCTATTGGTCAAAAAGCATCTTCTGTGGCTCAGGTAGTGACTACTTTCCAGGAAGGAG  
GGGCAATGGAATACACTATTGTGGTAGCCGAAACAGCAGATTACCTGCTACATTACAATATCTCGCTCCTTATACGGGA  
GCGGCTCTGGCCGAATATTTTTATGTACCGTGAACGACATACTTCAATAATTTATGATGATCTTTCAAACAGGCACAAGC  
TTATCGTCAAATGTCTCTTCTATTAAGAAGACCCCCTGGTCTGGAAGCTTATCCAGGAGATGTTTTTTATTTGCATTAC  
GACTTTTGGAAAGAGCCGCTAAATTAAGTTCCCGTTTAGGTGAAGGAAGTATGACTGCTTTACCAATAGTGGAGACTCAA  
TCCGGAGACGTTTTCGGCTTATATTCCTACTAATGTAATTTCTATTACAGATGGACAAATCTTCTTATCTGCCGATCTATT  
CAATGCTGGAATAAGGCCTGCTATTAATGTAGGTATTTCTGTTTCAAGAGTCGGATCGGCAGCTCAAATTAAGCCATGA  
ACAAGTAGCTGGCAAATCAAAATTGGAAGTACTCAATTTGCAGAATTAGAAGCCTTTGCACAATTTGCTTCTGATCTA  
GATAAAGCTACTCAGAATCAATTGGCAAGAGGTCAACGATTACGTGAGTTGCTCAAACAATCCCAATCAGACCCTCTCGC  
GGTAGAAGACCAGATAGCTACTATTTATACCGGAACAAATGGATATCTTGATGCGTTAGAAAATTGGACAGGTAAAGAAAT  
TTCTTGTGGGTTACGTACTTAAACAAAGAAGAAACCTAAATTTCAAAGAAATTTCTATCTTCTACCAAGATATTCACC  
GAAGAAGTGAACCCTTTTGAGAGAAGCTATTCAGGAACAGATTGAACTCTTTCTA---CTTCAGGAACAAACA-----

-----ATGAGAAACAATCCCAATTACTTCTGATCCTGTG-----

GTTTCTACACTTAAAGAACAAAACCAAGGGCGTATCGCTCAAATATTGGCCCAGTACTGGATGTCATTTTTCCATCGGG  
CAAGATGCCTAATATTTATAATGCTTTGATAATTAAGGTTCGAGATACTGTTGGTCATCAAATTAATGTAACCTGTGAAG  
TACAACAATTATTAGGAAATAATCGAGTGAGAGCTGTAGCTATGAGTGCTACAGATGGTCTGATGAGAGGAATGAAAGTG  
ATTGACACGGGAGCTCCTCTAAGTGTTCAGTCGGGGGAGCTACTCTCGGACGAATTTTCAACGTCCTTGGAGAGCCCGT  
TGATAATTTAGGTCTGTGATACTCGCACAACATTTCTATTTCATAGATCTGCACCCGCTTTCATACAGTTAGATACAA  
AATTATCAATCTTTGAAACAGGGATTAAGTTGTGGATCTTTTAGCCCCCTATCGCCGTGGAGGAAAAATCGGACTATTT  
GGGGGAGCTGGAGTGGGTAAAACAGTACTCATCATGGAATTGATCAACAACATTGCCAAAGCTCACGGAGGCGTATCCGT  
ATTTGGCGGAGTAGGTGAACGTAATCGTGAAGGAAATGATCTCTACATGGAAATGAAAGAATCCGGGGTTATTAATGAAA  
AAAATATTGCAGAATCCAAAGTGGCTCTAGTCTATGGTCAAATGAATGAACCGCCAGGAGCTCGTATGAGAGTTGGCTTG  
ACTGCCCTAACCATGGCGGAATATTTCCGAGA

Pinus

-----  
ATGTCTATAAAGGAGTGGTTTCAAGACAAGCGTAAAATAACTGCATTACTAAAAAATTCGGTTCGAA-----  
-----  
-----  
-----  
-----  
-----  
-----  
-----  
-----  
-----



-----  
-----  
-----  
-----AGGGAT-----AGTAAGGATGCC---AATGAGACGGAGAAAAAC-----  
-----AAGAATAAA-----AGTATTGATTACGCTAAAATTAAGAAGTTATGGGCTCAATGCGAT-----  
AATTGCGGAGAACTTACTA-----TATCTCAGATTCTTGAGAGAGAATCAAAGTGTGTTGT-----  
AAAGAATGTGGATATTATCTGCAAATGAATAGTTCAGATAGAATAGAACTTCCAATTGATCGTGACACTTGGCGTCT--  
-ATG---GAT---GAAGACATGTACTCTAGATGTTCTT---  
CAATTTTATTCTGAGAATGAACCTTCTCATTCTGATAATCTTAATTCTGAGGATGAATCT-----

TATAAGGATCATATCACTTTCTATCAAATAGAGACAGGTTTTAACTGATGCTATTCAAACAGGCATAGGTCAATTAATGG  
TCTTACTATCGCACTCGGAGTTATGGATTTTTAGTTCATGGGAGGTAGTATGGGCTCTGTAGTAGGTGAGAAAAATAACCC  
GTCTGATCGAGCGCGCTACCGCGGAATCTCTTCCATTAAATTATGGTGTGTGCTTCCGGAGGAGCACGTATGCAAGAAGGA  
AGTTTTAGTTTTAATGCAAATGGCTAAAATAGCTTCTGCATTATATATTTCAT-----  
CAGAAGGAGAAAAAGTTGTATATATATCGATTCTGACGTCACCGACAACCTGGTGGAGTGACTGCTAGTTTTGGCATGTT  
GGGAGATATTATTATTGCCGAACCTAAAGCGTACATTGCATTTGCAGGTAAAAGAGTAATCGAACAGACATTAGGTGAGA  
AAGTGAATTGAAGATTTTTCAGGTGACTGAGCATTATTTGGTTCATGGTTTTATTTGATCTGATCGTTCCACGTAATCTCTTA  
AAAGGTGTTCTGAGTGAACATTTTTGGTTTTACGTTTTACGGTCTTCTTGTAA-----  
-----ATGGAAGT-----

ATTAGACTCGACGAAATTAGTAGTATTATACGGAAACAGATCGAACAATATAACAACGAAGTAAGAGTTGGTAATCTTGG  
CACCGTACTTCAAGTAGGAGATGGCATTGCTCGTATTCATGGTCTTGATGAAGTAATGGCAGGGGAATTAGTGGAAATTTG  
GAGATGGTACAGTAGGCATTGCCCTAAATTTGGGATCGGATAATGTTGGAGCTGTATTAATGGGCGATGGCTTGATGATA  
CAAGAAGGTAGTTCGGTGGAGCAACAGGAAAAATTGCTCAGATACCAGTAAGTGATGCGTATTTGGGTCGTGTTGTAAA  
TGCTCTAGCCCCAACCCATTGATGGTAAGGGTAAAATTTAGCTTCCGAATTTGACTGATTGAATCTCCCGCTCCAGGTA  
TTATATCAAGACGTTCCGTATATGAACCCCTTCAAACGGGGCTTATTGCTATTGATTCTATGATTCTATAGGGCGTGGT  
CAGCGAGAATTAATTATTGGGGACAGACAGACCGGCAAGACAGCAGTAGCTACAGATACTATTCTTAATCAAAGAGTCA  
AAATGTAATCTGTGTCTATGTAGCAATTGGTCAAAGAGCTTCTTCCGTGGCTCAGGTAGTTAATACATTCCGAGAACGTG  
GCGCAATGGCATATAACCATTGTGGTAGCGGAAACTGCGGATTCTCCCGCTACATTACAATATCTCGCCCTTATAACAGGA  
CAACTTTGGTGAATACTTTCATGTATAAAAAACAACACACATCAATCAATTTATGATGATCTCTCAAACAGGCACAAGC  
TTATCGACAAATGTCTCTTCTATTAAAGAAGACCACCTGGCCGAGAAGCTTATCCGGGAGATGTTTTCTATTTCATTCCC  
GTCTCTTGGAAAGAGCAGCTAAATTAAGTTCCAGTTAGGTGAGGGGAGTGTACTGCTCTACCAATAGTTGAGACTCAA  
GCTGGAGATGTTTTAGCTTATATTTCCACTAATGCAATTTCCATTACCGATGGACAAATATTTTTCATCGGCCGATCTATT  
CAATGCCGGGATCCGACCTGCTATTAATGTGGGTATTTCCGTCTCTAGAGTAGGATCTGCGGCTCAGATAAAAAGCTATGA  
AAAAGGTAGCTGGAAAGTTGAAATTAGAGTTAGCTCAATTTGCAGAGTTGGAAGCTTTTTGCACAATTTGCTTCCGATCTT  
GATAAAGCTACTCAAGATCAATTGGCGAGGGGTCAACGATTACGTGAGTTGCTCAAACAATCTCAGTCGGCTCCTTTGAC  
TGTAGAAGAACAATAGCTACTATTTATACCGGAACAACCGGATACCTGGATATATTCGAAATAGCACAGGTGAGAAAAAT  
TTCTCCTTGGGTTACGTTTTATTTGATAAAAAATAAACCTCAGTTCGGAGAAATATACGTTCTACTGGTACATTTACA  
GAAGAAGCGAAAGCCCTTCTGGAAGAGGCTCTT-----  
-----ATGAGAAAAAATCCTCTTGTT-----CTTGGG-----

GTTTTCCGCAAGTGTAGAAACAAATGTGGGACGTATTGCTCAAATCATTGGCCCAGTACTGGATGTCTCTTTTCCCTCCAGG  
TAATATGCCTAATATTTACAATTCATTGATAGTTAAGGGTCAAGGTACAGCCGGTCAAGAAATTCAGGTTACTTGTGAGG  
TACAACAATTATTAGGAAATCATAAGGTTAGAGCTGTAGCTATGAGTGCTACAGATGGTTTTGACGAGAGGAATGAGAGTG  
ATTGACACGGGAGCTCCTCTAAGTGTCCAGTTGGTGGAGCTACTCTCGGACGAATTTTCAATGTTCTTGGAGAACCTGT  
CGATAATTTGGGTCCTGTAGATGCTGGCATAACATCTCCTATTATAGACCTGCTCCCGCCTTTACAGAGTTGGATACAA  
AATTATCCATCTTCGAAACAGGCATTAAAGTAGTAGATCTTTTGCTCCTTACCGCCGTGGGGGAAAAAATGGTTTTATTT  
GGAGGAGCTGGAGTGGGTAACAGTACTCATTATGGAGTTGATCAACAACATTGCTAAGGCTCATGGAGGGGTATCTGT  
ATTTGGAGAGTAGGAGAACGTACCCGTGAAGGGAATGATCTTTACATGGAAATGAAAGAATCGGGAGTAATTGATGAAC  
AAAAAATATCAGAATCAAAGTGGCTCTGGTCTATGGTCAAGTGAATGAACCACCGGGAGCTCGCATGAGAGTCGGTTTA  
ACTGCTTAACCATGGCCGAATATTTCCGAGA

Piper

-----  
-----  
-----  
-----  
-----  
-----  
-----  
-----ATCTATTGATTTTTCAATCAAATAAGGAAAGGTTCTATGGAAGG-----CGGCGGTTGATTCGGTGTGTTGTCT-----  
-TACGGGAAGTTAGAATACTGGCGTGGGCTAAGTAAATCAATGGGCAGT---TTTAGTAGTCCTATTGAAATATC-----

-----AGCGGAAGCGGGGACTCCACTATA---  
AATGATAGGGATAAAACTATTGAGAATTGG---AGTGAT-----AGGAGCAGTTATAGTTGC---  
CCTAATGTTGATTATTTATTC-----GGTGTTATGGACATTTTTGGGTTTTGGTTTTCTGATGACACTTTTTTCGTC--  
----AGGGATGGTAGTGGTGACACCTATTCATATATTTTTGATGTCGAGAGTCAGATTTTTGAGATTGAC-----  
-----  
-----AAT-----GATAGTTCCTTTCTAAGTGAAGTAGAA-----  
AGTTCTTTTCTAGTTATCAG-----  
AATAGTAGATTTGGGCCG-----AAGGACGACAAT---  
CGCGATTATTATTGTTAC-----ATGTATGAT-----ACGAAATACAGTTGGAATACGCACATT-----  
AATAGTTGCATTGATAGCTACCTT-----CGCTCTGAAATCAGTATTGAT---  
AGTTACATTTCAAGTAGTAGCGACTATTAC-----AACGATAGT-----  
-----TACATTTATACTTTTCATTTTT---AGTGAAAGT---  
GTA---AATGATAGTGAGAGC-----GGGAGCTCGGGTATAAAAACT-----  
ATCACTAAT-----GATCACGATTCC---AATATAAGAGAAAAATCGAACGAT-----  
AATGATTTTC-----GATATAAAT---AAAAAATACAGACATTTATGGGTTCAATGCGAA-----  
AATTGTTATGGATTAAAT-----TATAAGAAATTTTTTCAGTCAAAAATGAATATTTGT-----  
GAACAATGTGGATATCATTGAAAATGAGTAGTTCAGATAGAATCGAACTTTTCGATTGATCCGGGCCTTGGGATCCT--  
-ATG---GAT---GAAGACATGGTTTTCTATCGACCCTATT---GAATTTAC-----  
-----TCGGAGGAAGAACC-----  
-----  
TATAAGGATCGCCTCGATTCTTATCAAAGAAAGACGGGTTTAACTGAGGCCGTTCAAACAGGTGTAGGTCAACTAAATGG  
TATTCCTGTAGCAATTGGAGTTATGGATTTTTAGTTTCATGGGGGGTAGTATGGGATCCGTAGTAGGCGAGAAAATAACCC  
GTTTGATCGAGTATGCTACTAATAGATCTCTACCCGTCATTATGGTGTGTGCTTCTGGGGGAGCGCGCATGCAAGAAGGA  
AGCTTGAGCTTGATGCAAAATGGCTAAAATATCTTCTGTTTCATACGATTAT-----  
CAATCAAATCAAAGTTATTCTACGTATCAATCCTTACATCTCCTACAACCTGGTGGAGTAACTGCCAGTTTTGGTATGTT  
GGGGGATATCATTATTGCCGAACCCAACGCCTACATTGCTTTTGCGGGTAAAAGAGTAATTGAACAAACGTTGAATAAAA  
CAGTCCCCGAAGGTTACAAGCGGCTGAGTATTTATCCATAAGGGCTTATTCGATCTAATTGTACCACGTAATCCTTTA  
AAAAGTGTCTGAGTGAATTTTTTTCAGTTACATGGTTTTCTTTCTTTGAATTCTAATTCAAAGCATTAG-----  
-----ATGGAACC-----  
CTTCGAGCTGACGAAATTAGTAATATTATCCGCGAGCGTATTGAACAATATAATAGAGAAGTCAATATTGTGAATACCGG  
CACCGTACTTCAAGTGGGCGATGGCATTGCTCGTATTCACGGTCTTGATGAAAGTAATGGCAGGAGAATTAGTAGAGTTTG  
ATGAGGGTACAATAGGCATTGCTCTAAATTTGGAATCAAATAATGTTGGCGTTGTATTAATGGGCGACGGTTTTGATGATA  
CAAGAAGGAAGTTCTGTAAGGCAACAGGAAGAATTGCTCAAATACCGGTGAGTGAGGCTTATTTGGGGCGTGTATAAA  
TGCTCTGGCTAAACCCATTGATGGGAGAGGTGAAATTTCTGCTTCTGAATCCCGGTTAATTGAATCTCCCGCTCCAGGCA  
TTATTTCAAGACGTTCCGTATATGAGCCTCTTCAGACAGGTCTTATTGCTATTGATTGATGATCCCTATAGGACGAGGC  
CAGCGAGAATTAATTATTGGGGACAGACAGACTGGAAAAACAGCAGTAGCCACAGATACTATTCTTAATCAAAAAGGGCA  
AAATGTAATATGTGTTTATGTAGCTATTGGTCAAAAAGCATCCTCCGTGGCTCAGGTAGTGACTACTTTCCAGGAGCAAG  
GGGCAATGGAATATACTATTGTAGTAGCCGAAACGGCGGATTCCCCTGCGACATTACAATACCTCGCGCCTTATACAGGG  
GCGGCTCTTGCTGAATATTTTATGTACCGTGAACAACATACTTCAATAATTTATGATGATCCCTCAAACAAGCACAAGC  
ATATCGCCAAATGTCTCTTCTATTAAGAAGGCCACCGGGGCGGAAGCTTATCCAGGAGATGTTTTTTATTTACATTCAC  
GCCTTTTGGAAAGAGCTGCTAAATTAATTTCTAGTTTAGGCGAAGGAAGTATGACCGCTTTACCAATAGTTGAGACTCAA  
TCCGGGGACGTTTTCGGCTTACATTTCCACTAATGTGATTTGATTACAGATGGACAAATATTCTTATCCTCGGATCTATT  
CAATGCTGGAATTCGTCCGGCTATTAACGTGGGCATTTCCGGTCTCCAGAGTAGGATCCGCGGCTCAAATTAAGCCATGA  
AACAGGTAGCTGGCAAATTAATAATTGGAAGTACTCAATTTCGAGAGCTAGAAGCCTTTGCGCAATTTGCTTCTGATCTT  
GATAAAGCCACCCAAAACCAATTGGCAAGAGGTCAACGATTACGCGAGTTGCTTAAACAATCTCAATCAGCTCCTCTTGC  
GGTCAAGAACAATAAGTTACTATTTATACTGGAGCGAATGGGTATCTTGATCCCTTAGAACTGGGCAGGTAAAGAAAT  
TTCTAGTTCAATTACGTACTTACTTAAAAACAAATAAACCTCAGTTCCAAGAAATAATATCTTCGACCAAGATATTCACC  
AAAGACGCGGAAGCTATTTTAAAGGAAGTAATTCAGAACAGATAGAAGTCTTCTA---CTTCAAGAACAACA-----  
-----ATGAGAATCAATCCTACTACTTCTGGTCTGGG-----  
GTTTCTACACTCGAAGAAAAAATCAGGGGCGTATTGTTCAAATCATTGGTCCGGTACTGGATGTAGCCTTTTCCCGGG  
CAAGATGCCTAATATTTACAACGCTTTGATAGTTAAGGGTCAGGATACCGTCCGGTCCAGCAAATTAATGTAACCTGTGAAG  
TACAGCAATTATTGGGAAATAATCGAGTCAGAGCTGTAGCTATGAGTGCTACAGACGGTCTGACGAGAGGAATGGAAGTA  
ATTGACACGGGAGCTCCTCTAAGTGTTCAGTCCGGTGGAGCTACTCTAGGACGAATTTTCAACGTTCTTGGAGAGCCTGT  
TGATAATTTAGGTCCTGTAGATACTCGTACAACATCTCCATTATCATGATCTGCGCCCGCTTTTATCCAGTTAGATACCA  
AATTATCTATTTTTGAAACAGGGATTAAGTAGTGGATCTTTTAGCTCCTTATCGCCGTGGAGGAAAAATCGGACTATTC  
GGAGGAGCTGGAGTGGGTAAAACGGTACTCATCATGGAATTGATCAACAACATTGCCAAAGCTCATGGGGGCGTATCCGT  
ATTTGGTGGAGTAGGCGAGCGCACTCGTGAAGGAAATGATCTTTACATAGAAATGAAGGAATCCGGAGTTATTAACGAAC

AAAATCTTGCAGAATCAAAAGTGGCTCTAGTTTATGGTCAGATGAATGAACCTCCGGGAGCTCGTATGAGAGTTGGTTTG  
ACTGCCTTAACCATGGCGGAATATTTCCGGGA

Platanus

-----ATGGAAAA-----TGGTGGTTCAATTCGATGTTGTCT-----  
AACGAGGAGTTAGAACACAGGTGTGGGCTAAGTAAATCAATGGACAGT---CTTGGT---GCTATTGGAAATAGC-----  
-----AGTGAAGTGAAGACCCCGTTATA---AATGATACGGATAAAAAACATTCATAGTTGG-  
--AGTGAT-----ATTGACAGTTCTAGTTAC---AGTAATGTTGATCATTATTTC-----  
GGTGTGAGGAACATTCGGAATTTTATCTCTGATGACACTTTTTTAGTT-----  
AGGGATAGGACTGGTGACAGTTATTCTATATATTTGGATATTGAAAATGAGATTTTTGAAATTGAC-----  
-----AAT-----GATCGTCTTTTTCTGAGTGAATTAGAA-----  
AGTTATTTTTCTAGTTATCTG-----  
AATAATAGG-----TCTAAGAGTGACACT---  
CACTACTATGACCGTTAC-----ATGTATGAT-----ACTAAATATACTTGAATAATCACATT-----  
AATAGTTGCATTGACAGTTATATT-----CGTTCTGAAATCAGTATTGAT---  
AGTTACATTTCAAGTGGTAGCGACAATTACGACAATTACAGTGACAGT-----  
-----TACATTTCTAGTTACATTTGT---AGTGAAAGT---  
GTAATAAATAGTAGTGACAGC-----  
GGGAGTTATAGTATAAGAAGTACTAGCAGCAGT-----GGCAGTGATTTTC---  
AATATAAGAGGAAGATAT-----AATGATCTT-----GATATAAAT---  
AAAAAATACAGGCATTTGTGGATTCAATGCGAA-----AATTGTTATGGATTAAT-----  
TATAAGAAATTTTTTAGGTCAAAAATGAATATTTGT-----  
GAACAATGTGGATATCATTGAAAATGAGTAGTTTCAAGATAGAATCGAACTTTTCGATTGATCCCGGCACCTGGGATCCT--  
-ATG---GAT---GAAGACATGGTCTCTATAGACCCCAT---GAATTTTCAT-----  
-----TCGGAGGAGGAGCCT-----

TATAAAGATCGTATAGATTCTTATCAAAGAAAGACAGGGTTAACTGAGGCTGTTCAAACAGGCATAGGTCAACTAAATGG  
TATTCCCATAGCAATTGGGGTTATGGATTTTCAGTTTATGGGGGTAGTATGGGATCCGATAGTAGCGAGAAAATCACCC  
GTTTGATCGAGTATGCTACTAATGGATCTCTACCTCTTATTATAGTGTGTGCTTCCGGAGGAGCACGCATGCAAGAAGGA  
AGTTTGAGCTTGATGCAAAATGGCTAAAATATCTTCCGCTTCATATGATTAT-----  
CAGTCAAATAAAAAGTTATTCTATGTATCAATCCTTACATCTCCTACAACCGGTGGGGTGACAGCTAGTTTTGGTATGTT  
GGGAGATATCATTATTGCCGAACCCAATGCCTACATTGCATTTGCGGGTAAAAGAGTAATTGAACAAACATTGAATAAGA  
CAGTACCTGAAGGTTACAAGCAGCTGAGTATTCCATAAAGGCTTATTTCGACTCAATCGTACCACGTAATCTTTTA  
AAAGGAGTTCTGAGTGAATTTTTCAGCTCCACGGTTCTTTCCCTTGAATCAAATTCATCAAGTAG-----  
-----ATGGTAACC-----

CTTCGAGCCGACGAAATTAGTAATATTATTCGTGAACGTATTGAGCAATATAATAGAGAAGTAAAGGTTGTGAATACCGG  
CACCGTACTTCAAGTAGGCGACGGTATTGCTCGTATTCACGGTCTTGATGAAGTAATGGCAGGTGAATTAGTAGAATTTG  
AAGAGGGTACAATAGGCATTGCTCTAATTTGGAATCAAATAATGTTGGTGTGTTAATGGGTGACGGTTTGTATGATA  
CAAGAGGGAAAGTTCTGTAAAAGCAACAGGACGAATTGCTCAGATACCAGTGAGCGAGGCTTATTTGGGTGCTGTTATAAA  
TGCCCTGGCTAAACCTATTGATGGTAGAGGTGAAATTTTCAGCTTCTGAATCTCGGTTAATTGAATCTCCTGCTCCAGGTA  
TTATTTGAGACGTTCCGTATATGAGCCTCTTCAAACGGGACTTATTGCTATTGATTGATGATCCCTATAGGACGCGGT  
CAGCGAGAATTAATTTGGGGACAGACAGACCGGTAAAACAGCAGTAGCCACGGATACTATTCTCAATCAAAAAGGGCA  
AAACGTAATATGTGTTTATGTAGCTATTGGTCAGAAAGCATCTTCTGTGGCTCAGGTAGTGACTACTTTTCAGGAAAGAG  
GGGCGATGGAATACACTATTGTGGTAGCCGAAACGGCAGACTCGCCTGCTACATTACAATACCTCGCTCCTTATACAGGA  
GCGGCTCTGGCCGAATTTTTATGTACCGTGAACGACATACTTCAATCATTATGATGATCCTTCCAAACAAGCCCAAGC  
TTATCGCCAAATGTCTCTTCTATTACGAAGACCACCCGGTCGCGAAGCTTATCCGGGAGATGTTTTTTATTTGCATTCAC  
GCCTTTTGGAAAGAGCCGCTAAATCAAGTTCTCTTTTGGGTGAAGGAAGTATGACCGCTTTACCAATAGTTGAGACTCAA  
TCGGGAGACGTTTTCGGCTTATATTCTACTAATGTAATTTCCATTACAGATGGACAAATATTCTTATCCGCCGATCTATT  
CAATTCTGGAATCCGACCTGCTATTAATGTGGGTATTTCCGTCTCCAGAGTAGGATCCGCAGCTCAAATTAAGCCATGA  
AACAAGTAGCCGGCAAATTAATAATGGAAGTGGCTCAATTTGCAGAGTTAGAAGCCTTTGCACAATTTGCTTCTGATCTC  
GATAAAGCTACTCAAATCAATTGGCAAGAGGTCAACGATTACGTGAATTGCTCAAACAATCCCAATCAGCCCCTCTTAC  
GGTGAAGAACAGATAGTTACTATTTATACCGGAACAAATGGGTATCTTGATTGTTAGAAATTGGACAGGTAAAGAAAT

TTCTCGTTTCAGCTACGTACTTATTTAAAAACGAATAAACCTCAGTTCCAAGAAATCATATCTTCTAGTAAGACATTACC  
GAGGAAGCAGAAGCCCTTTTGAAGGAAGCTATTTCAGGAACAGATGGAACGCTTTCTA---CTTCAGGAGCAAACA-----  
-----ATGAGAATTAATCCTACTACTTCCGGTCTGGG-----  
GTTTCCGCACCTTGAAGAAAAAACCTGGGGCGTATCGCTCAAATCATTGGTCCGGTACTAGATGTAGCTTTTCCCCCGG  
CAAAATGCCTAATATTTACAATGCTTTGGTAGTTAAGGGTCGAGATACTGTCCGGCAGCAAATTAATGTGACTTGTGAGG  
TACAGCAATTATTAGGAAATAATCGAGTTAGAGCTGTAGCTATGAGTGCTACAGATGGCCTGACGAGGGGAATGGAAGTG  
ATTGACACGGGAGCTCCTCTAAGTGTTCAGTCGGTGGAGCGACTCTCGGACGAATTTTCAATGTTCTTGGAGAACCCTGT  
TGATAATTTAGGTCTGTAGATACTCGCACAACATCTCCTATTCATAGATCTGCGCCTGCTTTTATACAGTTAGATACCA  
AATTATCTATTTTTGAAACAGGAATTAAGGTAGTGGATCTTTTAGCTCCCTATCGCCGTGGAGGAAAAATCGGACTATTC  
GGGGGAGCTGGGGTGGGTAAAACAGTACTCATCATGGAATTGATCAACAACATTGCCAAAGCTCATGGCGGTGTATCTGT  
ATTTGGCGGAGTAGGCGAACGTACTCGTGAAGGAAATGATCTTTACATGGAAATGAAAGAATCTGGAGTGATTAATGAAC  
AAAATATTGCAGAATCAAAGTAGCTCTAGTATATGGTCAGATGAATGAACCGCCGGGAGCTCGTATGAGAGTTGGTTTG  
ACTGCCCTAACTATGGCGGAGTATTTCCGGGA

Populus

-----ATGAAAAA-----TGTTGGTTCCATTTCGATGTTATCC-----  
AATGTGGAGTTAGAATACAGGTGTAGGCTAAGTAAATCAATGGATAAT---CTTGGT---CCTCTTGAAAATACC-----  
-----AGTGTAAAGTGAAGACCCGATTCTA---AATGATACAGAAAAAACACCTATAATTGG-  
--AGTCAT-----AGTGACAGT-----AGTAATGTTGATCATTTAGTC-----  
GGCGTTAGGGACATTCGGAATTTAAACGTGGATGACACTTTTTTAGTTTTAGGTAGGGATAATAAAAAAGACGGTTATTC  
CATATATTTTGATATTGAAAATCAAGTTTTTGGGATTGAC-----

---AAT-----AATCATTCTTTTTGAGTGAATTAGAA-----AAAGAATTTTCTAGTTATTGG-----  
-----AATTCTAGTTAT---TTA-----AATAAGGGG-----  
-----TCTAGGAGTGACGAT---TCCCCTATGATTATTCT-----ATGTATGAT-----  
AATAAATATAGTTGGAATAATTACATC-----AATAGTTGCATTGACAGTTATCTT-----  
CGTTCTCAAATCGGGATTGCT---AGTTCTATTTAAGTGGTAGTGAAAATTGC-----AGCGAAAGT-----

TACATTTCTACTTACATTTTG---GGTGAAGT---AGA---AATAGTAGTGAAACC-----  
-----GGGAATTCAGGCTAAGAACT-----AGCACGAAC-----GGTAGCGATTTCT---  
GCTCTAAAAGAAAATTCT-----AATGATCTC-----GGCGTAACT---  
CAAAAATACAAGCATTGTGGGTTCAATGTGAA-----ATTTGTTATGGATTAAT-----  
TATAAGAAATTTTTAAATCCAAAATGAATATTTGT-----  
GAACAATGTGGATATCATTTGAAAATGAGTAGTTTCAGATAGAATTGAACTTTTCGATTGATCCAGGCCTTGGGATCCT--  
-ATG---GAT---GAGGAGATGTTCTCTCTGGATCCCATT---GACTTTTCAT-----  
-----TCAGAGGAGGAACCT-----

TATAAAGATCGTATTGATTCTTATCAAAAAAGACAGGATTAACCGAGGCCATTCAAACCGGCATAGGTCAACTAAACGG  
CATTCCCCTAGCAATTGGGGTTATGGATTTTCAGTTTATGGGGGTAGTATGGGATCGGTAGTAGGCGAGAAAATTACTC  
GTTTAAATCGAGTATGCTACCAATCAATTTTACCTCTTATTCTAGTGTGTGCTTCCGGAGGAGCACGCATGCAAGAAGGA  
AGTTTGAGCTTGATGCAAATGGCTAAAATTTCTCCGCTTTATATGATTAT-----  
CAATCGAATAAAAAGTTAGTTTATGTATCAATCCTTACATCTCCTACGACTGGTGGGTGACAGCTAGTTTTGGTATGTT  
GGGGGATATCATTATTGCTGAACCCAACGCTACATTTGCATTTGCAGGTAAAAGAGTAATTGAACAAACATTGAATAAGA  
CAGTACCTGAAGGTTACAAGCGGCTGAATTTTTATTCCATAAGGGCTTATTCGATCCAATCGTACCACGTAATCTGTTA  
AAGGGCGTTCTGAGTGAGTTATTTTCAGCTCCACGCTTTCTTTTGAATCATAACTTAAGTAGAACCTTAACTTAA--  
-----ATGGTAACC-----

ATTCGAGCCGACGAGATTAGTAATATTATCCGTGAACGTATTGAGCAATATAATAGGGAAGTAAAGATTGTAAATACTGG  
GACCGTACTTCAAGTGGGTGACGGCATTGCTCGTATTTATGGTCTTGATGAAGTAATGGCAGGTGAATTGGTAGAATTTG  
AAGAGGGTACGATAGGCATTGCTCTTAATTTGGAATCAAATAATGTTGGTGTGTATTAATGGGTGACGGCTTGATGATA  
CAAGAGGGAAGTTCTGTAAAAGCAACAGGAAAAATGCTCAGATACCAGTGAGTGAGGCGTATTTGGGTCTGTATATAAA  
TGCCCTGGCTAAACCCATTGACGGTTCGAGGTGCAATTTTCATCTTCTGAATCTCGGTTAATTGAATCTCCCGCTCCAGGGA  
TTATTTCTAGGCGTTCCGTATATGAGCCTCTTCAAACAGGACTTATTGCTATTGACTCAATGATCCCTATAGGACGTGGT  
CAGCGAGAATTAATTATTGGGGACAGGCAGACCCGGTAAAACAGCAGTAGCCACAGATACGATTCTCAATCAACAAGGGCA

AAATGTAATATGTGTTTTATGTAGCTATTGGTCAAAAAGCATCTTCTGTGGCTCAGGTAGTAAATGCTTTACAGGAAAGAG  
GAGCAATGGAGTATACTATTGTGGTAGCCGAAACGGCGGATTCCCCGGCTACACTACAATATCTCGCTCCTTATACAGGA  
GCAGCTCTGGCTGAATATTTTTATGTACCGTGAACGACACACTTTAATTATTTATGATGATCTTTCCAAACAAGCGCAAGC  
TTATCGCCAAATGTCTCTTCTATTACGAAGACCCGCTGGACGTGAAGCTTATCCAGGAGATGTTTTTTATTTGCATTAC  
GCCTTTTGGAAAGAGCCGCTAAACCAAGTTCTTCTTTAGGTGAAGGAAGTATGACTGCTTTACCAATAGTTGAGACCCAA  
TCGGGAGACGTTTTCGGCTTATATTTCTACTAATGTAATTTCCATTACAGACGGACAAATATTCTTATCCGCCGATCTATT  
CAATGCTGGAATCAGGCCTGCTATTAATGTGGGTATTTCCGGTCTCCAGAGTAGGATCCGCAGCTCAAATTAAGGCTATGA  
AACAAGTAGCTGGTAAATTTAAATTTGGAATTGGCGCAATTTCGCAGAATTAGAAGCCTTTGCGCAATTCGCTTCGGATCTT  
GATAAAGCTACTCAGAATCAATTGGCAAGAGGTCAACGATTGCGTGAGTTGCTCAAACAATCCCAAGCCGCCCTTTTAC  
GGTGGCAGAACAGATAATGACTATTTATACCGGAACGAATGGTTATCTTGATTTCATTAGAAAATTGGACAAGTAAGGAAAT  
TTCTCGTTGAGTTACGTACTACTTAAAAACGAGTAAAACACTCAGTTTTCAAGAAATTATATCTTCTACAAAAACATTTACT  
GAAGAAGCGGAAGCCCTTTTGAAGAAGCCATTTCAGGAACAGATGGAACGTTTTCTA---CTTCAGGAACAGGTA-----  
-----ATGAGAATCAATCCTACTACTTCTGGTCCTGGA-----

GTTTCCGCGCTTGAAAAAAGAACCTGGGACATATCGCTCAAATCATTGGCCCAGTGCTAGATGTAGTTTTTCCCCCGGG  
CAAGATGCCTAATATTTACAACGCTCTGGTAGTTAAGGGTCGAGATACTGTGAGTCAACAAATTAATGTCACCTGTGAAG  
TACAGCAATTATTAGGAAATAATCGAGTTCGAGCTGTAGCTATGAGTGCTACAGATGGTCTAATGAGAGGAATGGAAGTG  
ATTGACACGGGAGCTCCCCTAAGTGTTCAGTAGGGCGGGCGACTCTAGGACGAATTTTCAACGTGCTTGGAGAACCTGT  
TGATGATTTAGGTCCTGTAGATACTCAGATAACATCCCCTATTCATAGATCTGCGCCTGCCTTTATACAGTTAGATACAA  
AATTATCTATTTTTGAAACAGGAATTAAGTCGTAGATCTTTTAGCCCCTTATCGCCGTGGAGGAAAAATCGGACTATTT  
GGGGGCGCTGGAGTAGGTAAAACAGTACTAATTATGGAATTAATCAACAACATTGCGAAAGCTCATGGGGGTGTATCCGT  
ATTTGGCGGAGTAGGTGAACGTACTCGTGAAGGAAACGATCTTTACATGGAATGAAAGAATCCGGAGTAATTAATGAAG  
AAAATATTGCAGAATCTAAAGTGGCTCTAGTTTATGGTCAGATGAACGAACCACCGGGAGCTCGTATGAGAGTTGGTTTG  
ACTGCCCTAACTATGGCGGAATATTTCCGAGA

Ranunculus

-----ATGGA AAAA-----TGCGTTTTCAATTCGATGTTGTCT-----  
AAGGAGGAGTTAGAGCACCAGTGTGGTCTAAGTAAATCACTAAAATGT---ACGGGT---TCCATTGGGAATACC-----  
-----AATGGGGGTGAAGACCTTGCTATA---AATAATATG-----ATTGCGGGTTGG-  
-GTTGAT-----AGTGATAACTCCAGT-----AATATTGATCATTTAGTA-----  
GGTGTAGCAACATTCGGAGTTTGATCTCTGATGACACTTTTTTAGTT-----  
AGGGATAGTAATGGTAAAAATTATTCAATATATTTTGATATTGAAAATCAGATTTTTTGAGATTGAA-----

-----ATTGAAGGCGATCGTTCTTTTCTGAGTGAATTGGAA-----  
AGTTTTTTTTCTAGTTACCTA-----  
AATTTAAATTATAGTTAT---CCG-----AATGATGGA-----TCTAAAAGTGACAAT--  
-CACTACTATGATCGTTCC-----ATGTATGAT-----ACTCAATATAGTTGGAATAATTACATT-----  
ACTAGTTGTATTGAGAATTATCTT-----CGTTCTGAAATACATATTGAT---  
AGTTACATTTCAAGCAGTAGTGACAATTAC-----AGTAAGAGT-----  
-----TACATTTCTAATTATGTTTGT---  
AGTGGAGGTGGTTTA--AATAGTACTGACAGC-----  
GAGAGTTTCAGTATACAACT-----AGCGCAAAT-----GGAAGTACTTTC---  
GATATGATAGGAAAATTT-----AAGAATTTTC-----GATATAAGT---  
CCAAAATACAGCCATTTGTGGGTTCAATGCGAA-----AATTGTTATGGATTAAT-----  
TATAAGAAAATTTTTTCGATTAAAACCTTCATATTTGT-----  
GAACAATGTGGATATCATTGAAAATGAGTAGTTTCAGAAAAGAATCGAAAATTTTGATTGATCCAGGCACCTGGGATGCT--  
-ATG---GAT---GAGGATATGGTTCCGTGGATCCCATT---GAATTTTCAT-----  
-----TCAGAGGAGGAACCT-----

TATAAAGATCGTATTGATTCTTATCAAAAAAAGACAGGGTAACTGAGGCTGTTCAAACAGGAATAGGTCAATTAACGG  
TATTTCCATAGCAATTGGGGTTATGGATTTTCAGTTTTATGGGAGGCAGTATGGGATCCGTAGTAGGCGAGAAAATAACTC  
GTTTGATCGAATATGCTACAAATGGATTTCTCCCTCTTATTATAGTGTGTGCTTCCGGGGGAGCGCGCATGCAAGAAGGG  
AGCTTGAGCTTGATGCAATGGCTAAAATATCTTCAGCTTCATATGATTAT-----  
CAATCAATAAAAAGTTATTCTACGTATCAATCCTTACATCTCCTACAACCTGGTGGAGTAACCGCCAGTTTTGGTATGTT

AGGAGATATTATTATTGCCGAACCTAATGCCTACATTGCATTTGCGGGTAAAAGAGTAATTGAACAAACATTGAATAAGA  
CAGTACCAGATGGTTACAAGAAGCTGAGTACCTATTCCAAAAGGGCTTATTTCGACCTAATTGTACCACGTAATCTTTTA  
AAGGGTGTCTGAGTGAATTTCCAGCTTACGGTTCTTTCCATTAAATAAAAAATTTTCATCAAGTAG-----

-----ATGGCAACC-----

CTTCGAGCCGACGAAATTAGTAATATTATCCGTGAACGTATTGAGCAATATAATAGAGAAGTCAAGATTGTGAATACCGG  
CACCGTACTTCAAGTAGGTGATGGCATTGCTCGTATTTCATGGTCTTGATGAAGTAATGGCAGGTGAATTAGTAGAATTTG  
AAGAGAAGACAGTAGGTATTGCTCTTAATTTGGAATCCAATAATGTTGGTGTGTCTTAATGGGTGACGGTTTGTATGATA  
CAAGAGGGGAGTTCTGTAAAAGCAACAGGAAGAATTGCTCAGATACCGGTGAGCGAGGATTATTTGGGTCTGTGTTATAAA  
TGCTCTAGCTAAACCTATTGATGGTAGGGGTGAAATTTTCAGCTTCCGGAATCTCGGTTAATTGAATCGCCCGCCCGGGTA  
TTATTTCAAGACGTTCCGTATATGAGCCGATGCAAACCGGACTTATTGCTATTGATGCGATGATCCCTATAGGACGCGGT  
CAGCGAGAATTAATTATTGGGGATAGACAGACCGGTAAAACGGCAGTACGCCACGGATACGATTCTCAATCAAAAAGGTCA  
AAATGTTATATGCGTTTATGTAGCTATTGGACAAAAGCATCTTCTGTGGCTCAGGTAGTACTACTTTCCAGGAACAGG  
GGGTAATGGAATACACTATTGTAGTAGCCGAAACGGCCGACGCGCCTGCTACATTACAATACCTCGTCTCTTATACAGGA  
GCGGCTTTGGCCGAATATTTTATGTACCGTGAACGGCATACTTTAATCATTATGATGATCTGTCCAAACAGGCACAAGC  
GTATCGCCAAATGTCTCTTCTATTACGAAGACCCCCAGGTCTGTAAGCTTATCCGGGAGATGTTTTTTATTTGCATTAC  
GCCTTTTGGAAAGAGCAGCAAAATTAAGTTCTCGTTTAGGTGAAGGAAGTATGACTGCGTTACCAATAGTTGAGACTCAA  
TCAGGAGATGTTTCGGCTTATATTCCTACTAATGTAATTTCCATCACAGATGGACAAATATTCTTATCCGCCGATCTATT  
CAATTCTGGAATTCGCCCGCGATTAATGTAGGTATTTCTGTCTCGAGAGTAGGATCCGCGGCTCAAATTAAGCTATGA  
ACAAGTTGCTGGCAAATTAATAATTGGAATTGGCTCAATTCGCAGAGTTAGAAGCTTTTGCACAATTCGCTTCTGATCTC  
GATAAAGCTACTCAGAATCAATTGGCGAGGGGTCAACGATTGCGTGAGTTGCTCAAACAATCTCAAGCAGCCCCCTTAAC  
GGTGAAGAACAGGTAGTGACGATTTATACCGGAACAAATGGGTATCTTGATTGTTAGAAATTGGACAAGTAAAGAAAT  
TTCTCGTTCAATTACGTACTTACTTAAAAAGTAGTAAACCTCAGTTCCAAGAAATAATATCTTCTACCAAGACATTACC  
GAAGAAGCAGAAGTCTTTTGAAGGAAGCTATTCAGGAACAGATGGAGCGATTTCTA---CTTCAGGAACAA-----

-----ATGAGAAGCAATCCTACTACTTCTGGTCCTGGG-----

GTTCCCGCGCTTGAAGAAAAAACCTGGGACGTATAGCTCAAATCATTGGTCCGGTACTGGATGTATCCTTTCCACCGGG  
CAAGATGCCTAATATTTACAACGCTTTGGTTGTTAAAGGTCAAGATGCTGTTGGCCAGCAAATTAATGTAACCTGCGAGG  
TACAGCAATTATTAGGAAATAATCGGGTTAGAGCTGTAGCTATGAGTGCTACGGATGGTCTGATGAGAGGAATGGAAGTG  
ATTGACACAGGAGCTCCTCTAAGTGTTCGGTTGGGGGAGCGACTCTCGGACGAATTTTCAACGTTCTTGGAGAGCCTGT  
TGATAATTTGGTCTGTAGATACTCGCAACAATCTCCTATTATAGATCCGCGCCTGCTTTTACAGTTAGATACTA  
AATTATCTATTTTTGAAACGGGGATTAAGGTAGTGGATCTTTTAGTCTTATCGTCTGAGGAGAAAAATCGGGCTATTC  
GGGGGGGCTGGAGTGGGTAAAACCGTACTCATCATGGAATTGATCAACAACATTGCCAAAGCTCATGGAGGTGATCCGT  
ATTTGGAGGGGTGGGCGAACGCACCTCGTGAAGGAAATGATCTTTACATGGAAATGAAAGAATCCGGGGTGATTAATGAAG  
AAAATATTGCGGAATCGAAAGTAGCTCTAGTCTATGGTCAGATGAATGAACCGCCAGGAGCTCGTATGAGAGTTGGTTTG  
ACTGCCCTAACCATGGCGGAATATTTCCGGGA

Spinacia

ATGCTTATTCGGGCAGGAAATGTTCAAATTTATTTTCATCGAATGACTATTCATCAATTTTATTTTCATGCGAATAGGGG  
GCAAGAAAGCTCTATGAAAAA-----TGGTGGTTCAATTCGATGTTGTCT-----

AAGAAAGAGTTAGAACACGGGTGTGGATTAAGTAAATCAATGGACAGT---CTTGGT---CCTATTGAAAATACC-----

-----AGTACAAAGGAAGATCCGAGTCTA---AATGATCCAGAAAAACAAATTCATAGTTCG-

--AGAAAT-----AGTGAAAGTTCTAGTTAC---AGTAATGTTAATCATTAGTT-----

CGTGGCATTGACATTGAGAATTTTCATCTCGGATGATACTTTTTTACTT-----

ATAGATACTAAAGGGGACAGTTATTCCATATATTTTGGATATTGAAAATCAAATTTTGGAGATTGAC-----

-----AAC-----GATCATTCTTTTCTGAGTAAACTGCAA-----

AGTTCTTTTTCAAATTATTGG-----

AATTCAAGTTAT---CTG-----AACTCTAGA-----TCTAAGAATGGCGAT---

ACTTATAATGGTCATTTCG-----CTGTATTAT-----ACTAACGATAGTTGGAATAATCACATT-----

AATAATTGCATTGACAGTTATCTT-----CATTCTCAAATCCGTAGTGAC---AGTTCCATCCTAAGTGGT-----

-----AATGACAGT-----

-----TACATTTTGGATTACATTTTT---AATGAAAGT---GGA---AATAGGAGTGAAAGT-----

-----TTCAGTAAAAGAAGTATCACG-----AAT-----

GGCAGTAATTTA---ACTAGAAGAGAAAGTTCT-----CATAATCTT-----GATGTAAC---

CAAAAATATAGACATTTGTGGGTTCAATGCGAA-----AGTTGTTATGCATTAAAT-----  
TATAAGAAATTGCTGAAGTCAAAAATGGGTATTTGT-----  
GAACAATGTGGATATCATTGAAAATAAGTAGTTTCAGATAGAATCGAACTTCTGATTGATCCCGGTACTTGGAAATCCA--  
-ATG---GAT---GACGATATGGTCTCTATGGATCCTATC---GGATTTTCAT-----  
-----TCGGAGGAGGAAGCT-----

TATAAAGATCGTATTGATTCTTATCAAATAAAGACGGGTTTAACTGAAGCTGTTCAAACCGGTATAGGTCAACTAAACGG  
TATTCCTGTAGCAATTGGGGTTATGGATTTTCAGTTTATGGGAGGTAGTATGGGATCTGTAGTAGGGGAAAAAATAACCC  
GGTTGATTGAGTATGCTTCCAATAAATTCATACCCCTTATTATAGTATGTGCTTCCGGAGGGGCACGTATGCAAGAAGGA  
AGCTTGAGCTTAATGCAAATGGCAAAAATCTCGTCTGTTTTATATGATTAT-----  
CAATCAAATAAAAAGTTATTTTATGTATCAATCCTTACATCTCCTACTACTGGTGGGGTGACAGCCAGCTTTGGTATGTT  
GGGGATATCATTATTGCCGAACCTAACGCCTACATTGCATTTGCGGGTAAAAGAGTAATTGAACAAACATTGAATAAGA  
CAGTACCTGAAGGTTTACAAGCAGCCGAATTTTTTATTCCATAAGGGTTTTATTTGATCCAATCGTACCGCGTAATCTTTTA  
AAAGGCGTTCTAAGCGAGTTATTTGAGCTGCATGCTTTTTTTTCTTTGAATCAAATAAAGGCGAGGATTAA-----  
-----ATGGCAACC-----

ATTCGAGCAGATGAAATTAGCAAAATTATCCGTGAACGTATTGAAGGATATAATCGAGAAGTAAAGGTTGTAAATACCGG  
TACAGTGCTTCAAGTGGGTGACGGCATTGCTCGTATTACCGTCTTGATGAAGTAATGGCAGGTGAATTAGTAGAATTTG  
AAGAGGGAACAATAGGTATTGCTCTGAATTTGGAATCAAATAATGTTGGTGTGTATTAATGGGTGACGGGTTGATGATA  
CAAGAGGGAAGTCTGTAAAAGCAACAGGAAGAATTGCTCAGATACCCGTGAGTGAGGCTTATTTAGGGCGTGTATAAAA  
TGCCCTAGCTAAACCTATTGATGGTAGGGGTGAAATTACAGCTTCTGAATCTCGGTTAATTGAATCTCCCGCTCCTGGTA  
TTATGTCCAGACGTTCCGTGTATGAGCCTCTTCAAACCGGACTTATTGCTATTGATGCAATGATCCCTGTAGGGCGTGGT  
CAGCGAGAATTAATTATCGGGGACAGACAACTGGTAAAACAGCAGTAGCCACAGATACGATTCTCAATCAACAAGGACA  
AAATGTAATATGTGTTTATGTAGCTATTGGACAAAAAGCATCTTCTGTGGCGCAGGTAGTTACTAACTTCCAGGAAAGGG  
GAGCAATGGAATACACTATTGTGGTAGCCGAAACAGCGGATTCCCCCGCTACATTACAGTATCTCGCTCCTTATACCGGA  
GCGGCGCTGGCGGAATATTTTATGTACCGTGAGCGACACACTTTAATCATTATGATGATCTTTCCAAACAAGCACAAGC  
TTATCGACAAATGTCTCTTCTATTACGAAGACCACCTGGACGTGAAGCTTATCCGGGAGATGTCTTTTATTTGCATTCAC  
GCCTTTTGGAAAGAGCCGCTAAATTAAGTTCTCTTTTAGGTGAAGGAAGTATGACCGCTTTACCAATAGTCGAGACCCAA  
GCAGGAGATGTTTTCGGCTATATTTCTACTAATGTAATTTCCATTACAGATGGACAAATATTCTTATCCGCCGATCTATT  
CAATGCTGGAATCAGACCGGCTATTAATGTGGGTATTTCTGTTTTCTCGGGTAGGATCTGCGGCTCAAATTAAGCCATGA  
AAAAAGTAGCTGGTAAATAAAATTGGAATGGCGCAATTTGCAGAATTAGAAGCCTTTGCACAATTTGCTTCTGATCTT  
GATAAAGCTACTCAGAATCAATTGGCAAGAGGGCAACGATTACGCGAATTGCTTAAACAACCCCAATCCGCCCTCTCAC  
GGTAGAAGAACAGGTAATGACTATCTATACCGGAACGAATGGTTATCTTGATTATTAGAACTTGATCAAGTAAGAAAAT  
ATCTTGTTGAATTACGTACTTATGTAAAAACGAATAAACCGGAGTTCCAAGAAATTATATCTTCTACCAAGACATTTACT  
GAGGAAGCAGAAGCCCTTTTAAAAGAAGCTATTCAAGAACAGATGGAACGCTTTCTA---CTTCAGGAACAAGCA-----  
-----ATGAGAATCAATCCTACTACTTCTGATCCTGGG-----

GTTTCCACACTTGAAAAAACAACCTGGGGCGTATCGCTCAAATATTGGTCCGGTACTGGACGTAGCCTTTTCTCCAGG  
CAAGATGCCCAATATTTACAACGCTCTAATAGTTAAAGGTGAGATACTGCTGGTCAACCAATGAATGTGACTTGTGAAG  
TACAACAATTATTAGGAAATAATAGAGTTAGAGCTGTAGCTATGAGTGCTACAGATGGTCTAACGCGAGGAATGGAAGTT  
ATCGACACAGGAGCTCCTTTAAGCGTTCAGTCCGTGGAGCGACTCTTGACGAATTTTTAACGTGCTTGGGGAGCCTGT  
TGATAATTTAGGTCCAGTAGATACACGCACAACATCTCCTATTATAGATCGGCGCCCGCTTTACACAGTTAGATACAA  
AATTATCTATTTTTGAAACAGGAATTAAGTGGTAGATCTTTTAGCCCTTATCGCCGTGGAGGAAAAATCGGACTATTT  
GGGGGAGCGGGAGTGGGTAAAACAGTACTCATTATGGAATTGATTAACAATATTGCCAAAGCTCATGGGGGCGTATCCGT  
ATTTGGCGGAGTAGGTGAACGTACTCGTGAAGGAAATGATCTTTACATGGAAATGAAAGAATCCGGAGTTATCAATGAAC  
AAAATATCGCAGAATCAAAGGTGGCTTTAGTTTTATGGGCAAATGAATGAACCGCCAGGAGCGCGTATGAGAGTTGGGTTG  
ACTGCCCTAACTATGGCGGAATATTTCCGAGA

Triticum

-----  
-----  
-----  
-----  
-----  
-----  
-----  
-----  
-----  
-----

-----  
-----  
-----  
-----  
-----  
-----  
-----  
-----  
-----  
-----  
-----  
-----  
-----  
-----  
-----  
-----  
-----  
-----  
-----  
-----  
-----

-----ATGGCAACC-----

CTTCGAGTCGACGAAATTCATAAAATCTCCGCGAACGTATTGAACAATATAATAGGAAAGTAGGGATTGAGAATATAGG  
TCGCGTAGTTCAAGTGGGGGATGGGATTGCTCGTATTATAGGTCTTGGTGAAATAATGTCAGGTGAATTAGTCAATTTG  
CAGAAGGTACTAGGGGATTTGCTCTGAATTTGGAATCCAAAAATGTTGGGATTGTATTAATGGGCGATGGGTTGATGATA  
CAAGAGGGAAGTTTTGTAAAAGCAACAGGAAGAATTGCTCAGATACCCGTGAGTGAGGCTTACTTGGGTCGTGTTGTAAA  
TGCTCTGGCTAAACCTATTGATGGGAAAGGCAAAATTATAGCTTCCGAATCTCGCTTAATTGAATCTCCTGTCTCAAGTA  
TAATTTCCAGGCGTCCGTATACGAACCTCTTCAAACAGGGCTTATTGCTATCGATTTCGATGATCCCTATAGGGCGCGGT  
CAGCGAGAGTTAATTTATGGGACAGACAGACTGGCAAACAGCAGTAGCCACAGATACAATTTCTCAATCAAAAAGGGCA  
AGGTGTAATATGTGTTTTATGTAGCTATCGGTCAAAGAGCATCCTCCGTAGCTCAAGTAGTAACACTTTCCATGAGGAGG  
GGGCCATGGAATACACTATTGTAGTAGCTGAAATGGCGGATTACCTGCTACATTACAATACCTCGCTCCTTATACGGGA  
GCAGCCCTGGCTGAGTATTTTATGTACCAGCAACCGGCATACTTTAATAATTTATGATGATCTCTCCAAACAGGCACAAGC  
TTATCGCCAAATGTCCCTTCTATTAAGAAGACCTCCCAGGCGTATAGGCTTATCCAGGGGATGTTTTTTATTTGATTAC  
GCCTTTTGAAGAGCCGCTAAATTAATTTCTCTTTTAGGCGAAGGAAGTATGACCGCTTTACCAATAGTTGAGACTCAA  
TCTGGAGACGTTTTCCGCCTATATTCTACTAATGTAATCTCCATTACAGATGGACAAATATTCTTATCTGCGGATCTATT  
CAATGCCGGAATTCGACCCGCTATTAATGTGGGTATTTCTGTTCCAGAGTAGGATCCGCGGCTCAAATTAAGCCATGA  
AACAAGTAGCTGGCAAATCAAAATTGGAAGTAGCTCAATTTCGCAGAGTTACAAGCCTTTGCACAATTCGCCTCTGCTCTC  
GATAAAACAAGTCAGAATCAATTTGGCAAGGGGTCGACGATTAAGGGAATTGCTTAAACAATCCCAGGCAAATCCTCTCCC  
AGTGAAGAGCAGATAGCTACTATTTATACCAGCAACAGAGGATATCTTGATTCGTTAGAAAATTGAACAGGTAAATAAAT  
TTCTGGATGAGTTACGTAACATCTAAAAGATACTAACCTCAATTCGAAAGAAATTATATCTTCTAGCAAGACATTACC  
GAGCAAGCGGAAATCCTTTTGAAGGAAGCTATTCAGGAACAGCTGGAACGGTTTTCT---CTTCAG-----  
-----ATGAGAACCAATCCTACTACTTCTCCTCCCGG-----

GCTTCCACAATTGAAGAAAAAAGTACAGGTTCGTATCGATCAAATTTGGACCCGTGCTGGATGTCACTTTTCCCCCAGG  
CAAGTTACCTTATATTTATAACGCTTTGGTAGTCCAGAGTAGAGACACTGACGATAAGCAAATTAATGTGACTTGTGAGG  
TACAACAATTATTAGGAAATAATCGAGTTAGAGCTGTAGCTATGAGTGCTACGGACGGGTTGATGAGAGGAATGGAAGTG  
ATTGACACGGGAGCTCCTCTCAGTGTTCCGGTCGGTGGAGCTACTCTTGGACGAATTTTCAACGTTCTTGGGGAGCCTGT  
TGACAATTTGGGTCTGTAGATAGTAGTGCAACGTTCCCTATTCATAGATCTGCGCCTGCCTTTATCGAGTTAGATACGA  
AATTATCCATCTTTGAAACAGGTATTAAGGTTCGTGATCTTTTAGCTCCTTATCGACGTGGAGGAAAAATAGGACTATTT  
GGGGGGCTGGAGTAGGTA AACAGTACTGATCATGGAATTAATCAATAACATTGCTAAAGCTCATGGGGGGCTATCCGT  
ATTCGGTGGAGTAGGGAAACGGACTCGTGAAGGAAATGATCTTTATATGGAAATGAAGGAATCCGGAGTAATTAATGAAA  
AAAATATTGAGGAATCAAAGGTAGCTCTAGTCTATGGCCAAATGAATGAACCACCGGGGAGCTCGTATGAGAGTTGGTTTTA  
ACTGCCCTAACTATGGCGGAATATTTCCGAGA

Typha

-----  
-----  
-----  
-----





AAAATCTTGCAGAATCAAAAGTAGCTCTAGTCTACGGTCAAATGAATGAACCGCCGGGAGCTCGTATGAGAGTTGGTTTG  
ACTGCGCTAACTATGGCGGAATATTTCCGGGA

Vitis

ATGACTATTCAATTTATTGTATTTAATGTAAATAGGGGGCAAGAAAGCTCTATGGAAAAA-----  
TGGTGGTTCAATTCGATGTTGTCT-----AACGAGAAGTTAGAATACAGGTGTGGGCTAAGTAAATCAACGGACAGT--  
-CCTGAT---CCTATTGAAAATACC-----AGTGAAGTGAAGACCGGGTTATA---  
AATAATACGGATAAAAAACATTAATAATTGG---AGTCAA-----ATTAAGAGTTCTAGTTAT---  
AGTAATGTTGATCATTTATTC-----GGCATCAGGGACATTCGGAATTTTCATCTCTGATGACACTTTTTTAGTT--  
----AGGGATAGGAATGGGGTCAGTTATTTTCATATATTTTGATATTGAAAATCAAATTTTTGAGATTGAT-----

-----AAC-----GATCAGTCTTTTTTGGAGTGAAGTAGAA-----  
AGTTTTTTTTTATAGTTATCGG-----  
AATTCTAGTTAT---CTG-----AATAATGTAAATTTCTAGTTATCTGAATAATGTATCTAAGAGTAATCAT---  
CCCCACTATGATCGTTAC-----ATGTATGAT-----ACTAAATATAGTTGGAATAAGCACATT-----  
AATAGTTGCATT-----AAT---  
AATTACATTTTAAGTGGTAGTAACAATTAC-----AGTGACAGT-----  
-----TACATTTATAGTTACATTTGT---GGTCAAAGT---  
AGA---ACTAGGAGTGAACAC-----GGGAGTTCAGTAAACAAACT-----  
AGCACGAAT-----GGTAGTGATTTA-----AAAAGTTCT-----  
AATGTTCTA-----TATGTAGCT---CAAAAATACAGGCATTTGTGGATTCAATGCGAA-----  
AATTGTTATGGATTAAAT-----TATAAAAAAATTTAAAGTCAAAAATAAATATTTGC-----  
GAACAATGCGGATATCATTTGAAAATGAGTAGTTTCCAGATAGAATCGAACTTTTCGATTGATCCGGGTACGTGGGATCCT--  
-GTA---GAT---GAAGACATGGTCTCTCTGGATCCTATT---GAATTTTCAT-----  
-----TCGGGGGAGGAACCT-----

TATAAAGAGCGTATTGATTTTTATCAAAGAAAGACAGGATTAAGTGGAGCTGTTCAAACAGGCACAGGTCAACTAAACGG  
TATTTCCCGTAGCAATTGGGGTTATGGATTTTCAGTTTATGGGGGGTAGTATGGGATCCGTAGTAGGTGAGAAAATTACCC  
GTTTGATCGAATATGCCACCAATGAATTTCTACCTCTTATTCTAGTGTGTTCTTCCGGAGGAGCACGTATGCAAGAAGGA  
AGTTTGAGCTTGATGCAAATGGCTAAAATATCTTCCGCTTTATATGATTAT-----  
CAATCAAATAAAAAGTTATTTTATGTATCAATCCTTACATCTCCTACTACTGGTGGGGTGACAGCAAGTTTTGGTATGTT  
GGGAGATATCATTATTGCCGAACCCAATTCCTACATTGCATTTGCGGGTAAAAGGGTAATTGAACAAACATTGAAAAAGA  
CAGTACCTGAAGGTTACAAGCGGCTGAATATTTTCCATAAGGGCTTATTTCGATCCAATCGTACCACGTAATACTTTA  
AAGGGTGTCTGAGTGAATTTTTCAGCTTCAGCTTTCTTTTCTTTGAATCCAAAAAATCAAGTAG-----  
-----ATGGTAACC-----

ATCCGAGCCGACGAAATTAGTAATATTATCCGTGAACGCATTGAACAATATAATAGAGAAGTAAAGATTGTAAATACTGG  
TACCGTACTTCAAGTAGGCGATGGCATTGCTCGTATTCATGGTCTTGATGAAGTAATGGCAGGTGAATTAGTAGAATTTG  
AAGAAGGTACAATAGGCATTGCTTTGAATTTGGAATCAAATAATGTTGGTGTGTTGATTAATGGGTGACGGTTTTGATGATA  
CAAGAGGGAAGTCTGTAAAAGCAACAGGAAGAATTGCTCAGATACCTGTGAGTGAGGCTTATTTGGGTGCTGTTATAAA  
TGCCCTAGCGAAACCTATTGATGGTAGAGGTGAAATTTTCAGCTTCTGAATCTCGGTAAATTGAATCTCCCGCTCCAGGTA  
TTATTTGAGACGTTCCGTATATGAGCCTCTTCAAACAGGGCTTATTGCTATTGATTCGATGATCCCTATAGGGCGTGGT  
CAACGAGAATTAATTTATGGGGATAGACAGACCGGTAAAACAGCAGTAGCCACAGATACTATTCTCAATCAACAAGGGCA  
AAATGTAATATGTGTTTATGTAGCTATTGGTCAAAAAGCATCCTCTGTAGCTCAGGTAGTGACTACTTTCCAGGAAAGGG  
GAGCGATGGAATACACTATTGTGGTAGCTGAAACGGCGGACTCGCCTGCTACATTACAATACCTTTGCCCTTATACAGGA  
GCAGCTCTGGCTGAATATTTTATGTACCGTAAACGACACACTTTAATTATTTATGATGATCCCTCCAAACAAGCACAAAGC  
TTATCGTCAAATGTCTCTTCTATTACGAAGACCACCTGGTTCGCGAAGCTTATCCAGGAGATGTTTTTTATTTGCACTCAC  
GCCTTTTGAAAGAGCCGCTAAATCAAGTTCTTCTTTAGGTGAAGGAAGTATGACTGCTTTACCAATAGTTGAGACCCAA  
TCGGGAGATGTTTTCGGCTTATATTCCCACGAATGTAATTTCCATTACAGATGGACAAATATTCTTATCCGCCGATTTATT  
CAATGCTGGAATCAGGCCTGCTATTAATGTGGGTATTTCCGTCTCCAGAGTAGGATCCGCGGCTCAAATTAAGCCATGA  
AACAAGTAGCTGGCAAATCAAAATTTGAACTGGCGCAATTTCGAGAATTAGAAGCCTTTGCACAATTTCTTCTGATCTT  
GATAAAGCTACTCAGAATCAATTTGGCAAGAGGTCAACGATTACGTGAATTGCTCAAACAATCCAAGCAGCCCCTCTTAC  
GGTGAAGAAGACAGATAATGACTATTTATACTGGAACAAATGGTTATCTTGATTCATTAGAAATTTGACAGGTAAGGAAAT  
TTCTTGCTGAGTTACGTAATTAATTAATAAAGCAATAAACCTCAGTTCCAAGAAATCATATCTTCTACCAAGACATTACC





TGCTCTCGCTAAACCTATTGATGGGAGAGGGCGAAATTGTCGCTTCAGAATCTCGCTTAATTGAATCTCCTGCTCCGGGTA  
 TAATTTCTAGGCGTTCCGTATATGAACCCCTTCAAACAGGGCTTATTGCTATCGATTTCGATGATCCCCATAGGGCGCGGT  
 CAGCGAGAGTAAATTATTGGGGACAGACAGACTGGCAAACAGCAGTAGCCACAGATAACAATTCTCAATCAAAAAGGTCA  
 AGATGTAATATGTGTTTATGTAGCTATCGGTCAAAGAGCATCCTCCGTGGCTCAAGTAGTAACACTTTCCACGAAGAGG  
 GGGCCATGGAATACACTATTGTAGTAGCTGAAATGGCGGATTACCCCGCTACATTACAATATCTCGCTCCTTATACGGGA  
 GCAGCCCTGGCTGAGTATTTTATGTACCGCGAACCGGCATACCTTAATAATTTATGATGATCTCTCAAACAGGCACAAGC  
 TTATCGCCAAATGTCCCTTCTATTAAGAAGACCTCCCAGGCGCGAAGCTTATCTAGGGGATGTTTTTATTTGCATTAC  
 GCCTTTTAGAAAAGAGCCGCTAAATTAATTTCTCTTTTAGGCGAAGGGAGTATGACCGCTTTACCAATAGTGGAGACTCAA  
 TCTGGAGACGTTTTCCGCCTATATTCTACTAATGTAATTTCAATTACAGATGGACAAATATTCTTATCCGCGGATCTATT  
 CAATGCCGGAATTCGACCTGCTATTAATGTGGGTATTTCCAGTTCCAGAGTAGGATCCGCGAGCTCAAATTAAGCCATGA  
 AACAAGTAGCTGGCAAATCAAAAATTGGAACACTAGCTCAATTGCGAGAATTACAAGCCTTTGCACAATTCGCTCCGCTCTG  
 GATAAAAACAAGTCAGAATCAATTGGCAAGGGGTCGACGATTACGGGAATTGCTTAAACAATCCCAATCAAACCCTCTCCC  
 AGTGGAAAGAGCAGGTAGCTACTATTTATACCGGAACGAGAGGATATCTTGATTTCGTTAGAAAATTGAACAGGTAAAGAAAT  
 TTCTGGATGAGTTACGTAAACACCTAAAAGATACTAAACCTCAATTCCAAGAAATTATATCTTCTAGTAAGACATTACC  
 GAGCAAGCAGAAAACCTTTTGAAGGAAGCTATTCAGGAACAGCTTGAACGGTTTTCC---CTTCAGGAACAAACA-----  
 -----ATGAGAACCAATCCTACTACTTCGCGTCCCGG-----  
 ATTTCCACAATTGAAGAAAAAAGCGTAGGGCGTATTGATCAAATTTATGGACCCGTGCTGGATATCACTTTTCCCGCGG  
 CAAGTTGCCTTATATTTATAATGCTTTGATAGTCAAGAGTCGAGACACTGCCGATAAGCAAATTAATGTGACTTGTGAGG  
 TACAACAATTATTAGGAAATAATCGAGTTAGAGCTGTGGCTATGAGTGCTACAGAGGGGTTGATGAGAGGAATGGAAGTG  
 ATTGACACGGGAACCTCTCAGTGTTCCAGTCGGTGGAGCTACTCTCGGACGAATTTTTAACGTTCTTGGGGAGCCTAT  
 TGACAATTTGGGTCTGTGGATACTAGTGCAACATTTCTATTATAGATCTGCGCCTGCCTTTATCGAGTTAGATACGA  
 AATTATCTATCTTTGAAACAGGTATTAAGGTGGTCGATCTTTTAGCTCCCTATCGACGTGGAGGAAAAATCGGACTGTTT  
 GGGGGGGCAGGAGTAGGTAAAACAGTACTCATCATGGAATTAATCAATAACATTGCTAAAGCTCATGGAGGCGTATCCGT  
 ATTTGGCGGAGTAGGGGAACGGACTCGTGAAGGAAATGATCTTTATATGGAAATGAAGGAATCCGGAGTAATTAATGAAA  
 AAAATATTGAGGAATCAAAGGTAGCTCTAGTCTATGGCCAAATGAATGAACCGCCGGGAGCTCGTATGAGAGTTGGTTTA  
 ACTGCCCTAACTATGGCAGAATATTTCCGAGA

Acorus

TGTTAATGAACAGGATGTACTTCTATTTATCGACAATATCTTCCGGTTTCGTACAAGCGGGATCAGAAGTATCTGCCTTAT  
 TAGGGCGGATGCCTTCCGCCGTGGGTTATCAACCTACCCTTAGTACAGAAAATGGGTTCTTTGCAAGAAAAGAAATTACTTCT  
 ACAAAGAGGGATCTATAACGTCTATTCAAGCGGTTTATGTACCTGCGGATGATTTGACTGACCCTGCTCCTGCCACCAC  
 ATTTGCACATTTGGATGCTACTACTGTACTATCAAGAGGATTAGCTGCCAAAGGATTTTATCCGGCAGTAGATCCTTTAG  
 ATTCACCGTCAACTATGCTCCAACCTAGGATCGTTGGCGAGGAACATTATGAAACTGCGCAAAGAGTTAAGCAAACCTTTA  
 CAACGTTACAAAGAACTTCAGGACATTATAGCTATCCTTGGGTTGGACGAATTATCCGAAGAGGATCGTTTTAACCGTAGC  
 AAGAGCACGAAAATTTAGCGTTTTCTTATCACAACCCTTCTTCGTAGCAGAAGTATTTACTGGTTCTCCAGGTAATATG  
 TTGGTCTCGCGGAAACGATTAGGGGGTTTTCAACTGATCCTTTCCAGGAGAATTAGATGGTCTTCCCAGCAGGCCTTTTAT  
 TTGGTGGGTAACATCGATGAAGCTACCGCGAAGGCTATGAATTTAGAA-----GTGGAG---AGCAAATTAAGAAA--  
 -  
 ATGAACTTAAAGCTTTGTTTTACTGACTCCTAATCGAATTTATTTGGGATTGCAAGAAATCATTCTATCTACTAA  
 TAGTGGACAAATTTGGCATATTACCAAATCACGCCTCTATTGCCACAGCTGTAGATATCGGTCTTTTGGAAATACGC---  
 CGC-----  
 GACGACCGATGGTTAGCGGTGGCTCTGATGGGGGGGTTTGGCTAGAATAGGAAATAATGAGATCACCATTTTAGGAAATGA  
 TGCCGAGATGGGTACTGACATTGATCCGCAAGAAGCTCAACGAGCTCTTGAATAGCTGAAGCTAACTTGAATAAGCTG  
 AAGGTAAGAGACAAGCAATTGAGGCAAATTTAGCGCTAAGACGAGCTAGGACACGGGCGGAGGCTATTAATGTTATTTCC  
 -----ATGAAAAATATAACCGATTCTTTTCGTTTTCC---TTG---  
 GGCCACTGGCCATTCGCCGGGAGTTTCCGGTTTT---  
 AATACCGATATTTTAGCAACAAATCTAATAAATCTAAGTGTAGTGCTTGGTGTATTGATCTTTTTTGGAAAGGGAGTG--  
 -----  
 TTAAGTGATTTATTAGATAATCGAAGACAGAGGATCTTGAGTACTATTGAAATTCAGAAGAAGTGCCTAGAGGAGCCCT  
 TGAGCAGCTCGAAAAAGCCCGGGCTCGCTTACGGAAGTAGAAATGGAAGCAGATGAGTATCGAGTGAACGGATACTCCG  
 AGATAGAACGAGAAAAGATGAATTTGATTAATGCCACTTATGAAAATTTGGAACGATTAGAAAATTACAAAAATGAAACC  
 CTTTCAATTTGAAACAACAAAGAGCAATTAATCAGGTCCGGCAACGAGTTTTTCCAACAAGCGTTACAAGGAGCTCTAGGAAC  
 TCTGAATAATTGTTTTG-----  
 AATAGTGAATTACATTTCCGTACCATCAGTGCTAATATTGGCATGCTTGGGGCCATGAAA-----GAAATA---  
 ACTGAT---  
 ATGAATCCACTGATTTCTGCCGCTTCCGTTATTGCTGCTGGATTAGCCGTAGGACTTGCCTTCTATTGGACCTGGGGTTGG  
 TCAAGGTAAGTGCAGGCAAGCCGTAGAAGGTATTGCGAGACAACCAGAAGCAGAAGGTAATAATACGAGGTAAGTTTAT

TGCTTAGTCTGGCTTTTATGGAAGCTTTAACAATTTACGGACTGGTCGTAGCATTAGCACTTTTATTTGCGAATCCTTTT  
GTC---ATGAATGTTATA-----CTATGTTCCAGCAACATGCTC---AAA---GGGTTA---  
TATGATATATCTGGTGTAGAAGTGGGCCAACATTTATATTGGCAAATAGGAGGGTTCCAAGTCCATGCCCAAGTACTAAT  
CACTTCTTGGGTTCGTAATTGCTATCTTATTAGGTTTCAGTCACTGTCGCTGTT---  
CGGAATCCACAAACCATTCCGACCAACGGTCAGAATTTCTTTGAGTATGTTCTTGAATTCATTTCGAGACTTGAGCAAAAC  
ACAGATTGGA---  
GAAGAATATGGTCCTTGGGTTCCCTTTATTGGAACAATGTTCCCTATTTATTTTTGTTTCGAATTGGTCAGGCGCTCTTTT  
ACCTTGAAAACATAGAGTTACCTCACGGGGAGTTAGCCGCACCCACGAATGATATAAATACTACTGTTGCTTTAGCTT  
TACCCACATCTGTAGCATATTTCTATGCGGGTCTTACCAAGAAAGGATTGGGTTATTTCCGGAAATACATTCAACCAACT  
CCGATCCTTTTACCAATTAATATCCTAGAAGATTTACAAAACCTTTATCACTGAGTTTTCGACTTTTCGGAAATATCTT  
GGCTGATGAATTAGTAGTTGTTGTTCTTGTCTTTTAGTACCTTTGGTAGTTTCTATACCTGTCATGTTTCTTGGATTAT  
TCACAAGCGGCATTCAAGCTCTTATTTTTGCAACTTTAGCCGCGGCCTATATAGGCGAATCCATGGAAGGTCATCAT---  
---  
ATGATATTTTCAACTTTAGAACATATATTAACCTCACATATCTTTTTCGATTATTTTCAGTTGTGATTACAATTCAGTTGAT  
GAAC-----TTATTA---GTC-----  
CACGAACTGGTACAACACTAGGTGATGCGTCAGAAAAAGGCATGATAGCTACCTTTTTCTCTATCACGGGATTATTGGTTAC  
TCGTTGGATCTATTCGGGTCAATTTCCCACTAAGTGATTTATATGAATCATTAACTTCTCCTTTTCATGGAGTTTCTCCATTA  
TTCATATGGTTCATAT-----TTTAGG---AACCACAGAAATCAT---  
TTCAGTGCAATAACTGCGCCAAGTGCCATTTTTACCCAAGGCTTTGCTACTTCGGGTCTTTAACGGAAATGCATCAATC  
CATAATATTAGTACCCGCTCTACAATCCCAGTGGTTAATGATGCATGTAAGTATGATGTTATTGAGCTATGCAGCTCTTT  
TATGCGGGTCAATTATTATCAGTTGCTCTTCTAGTTATTACGTTTCGAAAAAAC---AGCGATATTTTTGAT-----  
AAAAGAAATAATTTT-----TTA---ATTAGGTCAATTTTCTTTGGTGAGATTGAATACTTGAAT-----  
GAAAAA-----CGCAGTGTTTTA-----CAA-----AACACTTCG-----TTTGAT-----  
-  
TCATTTACAAATTATCACAAATATCAATTGACTCAACGATTAGATTTTTGGAGTTATCGGGTCATTAGTCTAGGGTTTAT  
CTTTTTAACCATAGGTATTCTATCGGGGGCAGTGTGGGCTAATGAGGCATGGGGATCTTATTGGAATTGGGACCCAAAGG  
AAATTTGGGCATTTATTACCTGGGCTATATTCGCAATTTATTTACATACTAGAACG-----  
AATCATAGTTTGAAGGT-----  
GCGAATTCGGCAATTGTGGCTTCTATCGGATTTCTTATAATTTGGATATGTTATTTTGGAGTCAATCTATTAGGAATAGG  
TTTACATAGTTATGGTTCATTC-----  
-----AAAGTG---CCAAAAAAG-----  
-----AAAGGATTTACTCCCCTCCCA-----TATCTTGCATCTATAGTATTT-----  
TTGCCCTGGTGGGTCTCTCTCATT-----  
AATAAGAGTCTGGAACCTTGGGTTACCAATTGGTGGAATACCAGACAATCTGAAACCTTTTTGAAATGATATTCAAGAGAG  
GAACGTTCTAGAAAGATTTCATCGAATTAGAAGAACTATTCTGTTG-----  
GACGAAATGCTAAAGGAG---  
AACCCGGAGACACGTATGAAAAATCTTCGTATAGGAATCCACAACGAAACGATCCAATTGGTCAAAACAGACAATGAGTA  
TCATCTCCATACCATTTTGCATTTCTCGACAAAATATAATCTGTTTCGCTATTCTAAGTGTTTATTCTATTCTGGGTAATG  
AAGAACTTGTCACTTCTAATTCTTGGGTTTCAGGAATTTCTTTATAACTTAAAGCGACACAATAAAAGCTTTTTTCGATTCTT  
TTAGTTACTGATTTATGGATTGGATTCCATTACCCCACGGTTGGGAATAATGATTGGTTCGGTCTACAATGATTTTGG  
ATTAGCTCATAACGAACA-----  
ATTATATCTGGGCTTGTTCCTACTTTTCCAGTTATTCTAGATACGATTGTGAAATATTGGATCTTCCATTATTTAAATCG  
TGTCTCTCCTTCACTTGTAGTGATTTATCATTCAATGAATGAC-----  
ATGCCATTGGTGTTCAAAAGTACCTTTTCGGAGTCT-----  
-----GGAGAGGAAGAT-----  
--GCAGCTTGGGTTGACATA---AACCGACTTCATCGAGAAAGATTACTT---  
TTTTTAGGCAAGAGCTTGATAGCGAAATCTCGAATCAAC

Amborella

TGTTAATGAGCAAGACGTACTTCTATTTATTGACAATATCTCTCGCTTCGTTCAAGCAGGATCAGAAGTCTCTGCCTTAT  
TAGGCAGAATGCCTTCTGCCGTGGGTTATCAACCTACCCTTAGTACAGAAATGGGTTCTTTGCAAGAAAGAATTACTTCT  
ACTAAAGAGGGATCCATAACTTCCATTCAAGCAGTTTATGTACCTGCAGACGATTTGACCGACCCTGCTCCTGCCACGAC  
ATTTGCACATTTAGATGCTACTACCGTACTATCAAGAGGATTAGCCGCCAAAGGTATCTATCCAGCAGTAGATCCTTTAG  
ATTCAACGTCAACTATGCTCCAACCTCGGATCGTTGGCGAGGAACATTACGAAACTGCGCAAAGAGTTAAGCAAACCTTTA  
CAACGTTACAAAGAACTTCAAGACATTATAGCTATTCTTGGACCAGATGAATTATCCGAAGAGGATCGTTTAACCGTAGC  
AAGAGCACGAAAAATTGAGCGTTTCTTATCACAAACCTTCTTCGTAGCAGAGGATTTACTGGTCTCCAGGAAAAATATG  
TTGGTCTCGCAGAAACAATTAGGGGGTTTCAACTGATCTTTCCGGAGAATTAGATGGTCTTCCCGAACAGGCTTTTTAT  
CTGGTAGGTAACATCGATGAAGCTACCGCGAAGGCTATTAACCTTAGAA-----GTAGAG---AGCAAATTAAGAAA--

ATGACCCTAAATCTTTGTGTACTGACTCCTAATCGAATCATTGGGATTGAGAAGTGAAAGAAATTATTTTATCCACTAA  
TAGTGGCCAAATTGGTGTATTACCAAATCACGCACCTATTGCAACGGCTGTAGATATAGGTATTCTCAAATACGC---  
CTC-----  
CAGGAGCAATGGTTAACAATGGCTCTGATGGGTGGTTTCGCCAGAATAGGCAATAATGAAATAACCATATTAGTAAATGA  
TGCGGAGAAGGGTAGTGACATTGATCCGCAAGAAGCTCAGCAAACCTTTGAAATAGCTGAAGCTAACCTGAGTAGAGCTG  
AGGGCAAGAGACAAACAATTGAGGCGAATTTAGCTCTTAGACGAGCTAGGACACGAGTAGAGGCTATCAATGCTATTTCCG  
TCC-----ATGAAAAATGTAACCGACTCTTTCGTTTCC---TTG---  
GGCCACTGGCCATCTGCCGGAAGTTTCGGATTT---  
AATACCGATATTTTGCAACAAATCCAATAAATCTAAGTGTGGTGCTTGGTGTGTTGATTTTTTTCGGAAAGGGAGTG--  
-----  
TTAAGTGATTTATTAGATAATCGAAAACAGAGAATCTTGAGTACGATTTCGCAATTGAGAAGAACTACGTGGGGGAGCCAT  
TGAGCAGCTTGAAAAAGCCCGGGCTCGCTTACGGAAGTGGAAATTGAAGCAGATGAGTTTCGAGTGAATGGATACTCTG  
AGATAGAACGAGAAAAAAGTAATTTGATTAATGCTGCTTATGAAAATTTAGAACGATTAGAAAATTACAAAAATGAAAGC  
ATTCATTTTGAACAACAAAGAGCGATGAATCAGGTCCGACAGCGAGTTTTCCAACAAGCCTTGCAAGGAGCTCTAGAAAC  
TCTGAATAGTTATTTG-----  
AACAGCGAGTTACATTTACGCACCATCAGTGCTAATATTGGCATGCTCGGGACCATGAAA-----AATATA---  
ACTGAT---  
ATGAATCCCCTGATTTCTGCTGCTTCCGTTATTGCTGCTGGATTGGCCGTAGGACTTGCTTCTATTGGACCCGGAGTCGG  
TCAAGGTACTGCTGCGGGTCAAGCCGTAGAGGGTATCGCGAGACAACCAGAAGCAGAGGGTAAAATACGAGGTACTTTAT  
TGCTTAGCCTGGCTTTTATGGAAGCTTTAACAATTTACGGACTGGTCGTGGCATTAGCGCTTTTATTTGCGAATCCCTTT  
GTT---ATGAGTGTCTA-----CCATGTTCCATCAACACACTA---AAA---GGGATA---  
TACGATCTATCCGGTGTGGAAGTAGGCCAACATTTCTATTGGCAAATGGGGGTTTCCAAGTCCATGCCCAAGTACTTAT  
AACTTCTTGGGTGCTAATTTGCTATCTTATTAGGTTTCAGCCACTATAGTTGTT---  
CGGAATCCACAAACCATTCCGACCGACGGTCAGAATTTCTTCGAATATGTGCTTGAATTCATTGAGACTTGACCAAAC  
TCAGATTGGAGAAGAAGAATATGGTCCCTGGGTCCCTTTATTGGAATATGTTTCCTATTTATTTTTGTTTTCTAACTGGT  
CCGGCGCTCTTTTACCTCGGAAAATCATAGAGTTACCTCAGGGGGAGTTAGCTGCACCTACAAATGATATAAATACTACT  
GTTGCTTTAGCTTTACCCACGTCAGTGGCATATTTCTATGCAGGTATTAGCAAGAAAGGATTGGGTTATTTTCGGTAAATA  
TATTCACAAACTCCCATACTTTTACCAATTAATATCTTAGAAGATTTTACAAACCTTTTATCACTTAGTTTTTCGACTTT  
TTGGGAATATATTGGCTGATGAATTAGTAGTTGTTGTTCTTGTCTTTAGTCCCTTCATTGGTTCCTATACCTGTCTATG  
TTCTCGGATTATTCACAAGCGGTATTCAGCTTTGATTTTTGCAACTTTAGCCGCGGCTTATATAGGCGAATCCATGGA  
GGGTATCAT-----  
ATGATATTGCGGACTTTAGAACATATATTAACCTCACATCTCTTTTTCAATAATTTCAATTGTCATTACGACTCATTGTAT  
GACC-----TTC---GCC-----  
CGTGAAATCGCAGGACTATCTGATTTGTCAGAAAAGGCATGATAGCTGTTTTTTTTGCGTATAACAGGATTATTAGTCAC  
TCGTTGGATTTATTCAGGACATTTACCATTAAGTAATTTATATGAATCATTAAATTTTTCTTTTCATGGGGTTTCTCTCTTA  
TTCATATGATTTCTAAA-----ATACAG---AACATAAGAATTTT---  
TTAAGTTCAATAACCGCGCCAAGTGCTATTTTAAACCAAGGCTTTGTCACCTTCGGGTCTTTTTAACTGAAATGCATCAATC  
CGCAATACTAGTACCTGCTCTACAATCCCATTGGTTAATAATGCACGTAAGTATGATGTTGTTGAGCTATGCAGCTCTCT  
TATGTGGATCCTTATTATCAATAGCTCTTCTAGTCATTACATTTAGAAAAAG---CTAGATATTATT-----  
-----TTCTTA-----TTA---ATTAGTTATTCTTTTTGGTGAGATCCAATATTTGAAT-----  
GAAAAA-----AGAAGTATTTTG-----CAA-----AACACT-----TCTTTT-----  
-----  
TCATTTAGAAATTACCACAAATATCAACTTACTCAGCAATTAGATCATTGGAGTTATCGTGTTATTGGTATAGGATTTAC  
CCTTTTAACTTTAGGTATTTCTTTTTCAGGGGCGGTATGGGCTAATGAGGCATGGGGATCCTATTGGAATTGGGACCCCAAGG  
AGACTTGGGCTTTTATTACTTGGACTATATCTGCGATTTATTTACATACTAGAACA-----  
AATAAAAACCTTGCAAAGT-----  
GCCAATTCAGCAATTTGGCTTCGATAGGATTTCTTATCATTGGATATGCTATTTTGGGGTCAATCTATTAGGAATAGG  
CCTACATAGCTATGGTTTCATTTCGCATTAAGG-----  
-----GTG---TCCAAAAAG-----  
-----AAAGCATTGACTTCCCTGCCA-----TATCTTGCATCTATAGTTTTT-----  
CTGCCCTGGGGAATTTCTCTATCATT-----  
AATAAAAGTCTGGAACCTTTGGGTTACAAATTTGGTGGAAATACCAGCCAATACGAAACTCTTTTGAATGAAATTCAGAAAA  
TAACGTTCTTGAAAGATTACATAGAATTAGAAGAACTATTCTTGTTG-----  
GACGAAATGATAAGGGAT---  
TATCCGGAGACACATATACAAAAGCTTCGTATAGGAATCCACAAAGAAACGATAGAATTGGTGAAAATGTACAATCAAGA  
TTATATCCATATAATTTGCGATTTCTCGACAAATATAATGAGTTTCGCTATTCTAAGTGCTTATTCTATTCTGGGTAATG

AAGAACTTGTCACTCTTAATTCTTGGGTTCCAGGAATTCTTCTATAACTTAAAGTGACACAATAAAAAGCTTTTTCTATTCTT  
TTACTAACCGATTTCATGTATCGGATTTTCATTCGCCCATGGTTGGGAACCTCATGATTGGTTCGGTCTACAAAGATTTTGG  
ATTTAGTCATAACGATCAA-----  
ATTATATCCGGTCTCGTTTTCCACTTTTTCCGGTTATTCTAGATACTATTTTGAAATATTGGATCTTCCATCATTAAATCG  
TATATCTCCTTCACTTGTAGTTATTTATCATTCAATGAATGAA-----  
ATGCCCGTTGGTGTTCACAAAAGTACCTTTTTCCGGAGTCCT-----GGAGAGGAAGAC-----  
--GCAACTTGGGTTGACATATACAACCGACTTCATCGAGAAAAGATTACTT---  
TTTTTAGGCCAAGAGGTTGAAGGTGAGATATCGAATCAAA  
Arabidopsis  
TGTTAATGAGCAAGAGCTACTTCTATTTATCGACAATATCTTCCGTTTTCGTACAAGCAGGATCCGAGGTATCCGCCTTAT  
TGGGTAGAATGCCTTCTGCTGTGGGTTATCAACCCACCCTTAGTACCGAAATGGGTACTTTACAAGAAAAGAAATTACTTCT  
ACGAAAAGGGGTCCATAACCTCTATTCAAGCAGTTTATGTACCTGCAGATGATTTGACTGACCCCGCACCTGCCACCAC  
ATTTGCACATTTAGATGCGACTACCGTACTATCAAGAGGATTAGCTGCCAAAAGGTATCTATCCAGCGGTAGATCCTTTAG  
ATTCACGTCAACTATGCTACAACCTCGAATCGTTGGCGAGGAACATTATGAAACTGCGCAACAAGTAAAACAAACTTTA  
CAACGTTACAAGGAGCTTCCAGGACATTATAGCTATCTTGGGTTGGATGAATTATCCGAAGAGGATCGCTTAACCGTAGC  
AAGAGCACGAAAATGAGCGTTTTCTTATCACAACCCTTTTTTCGTAGCAGAAGTATTTACAGGTTCTCCGGGAAAATATG  
TTGGTCTAGCGGAAACAATTAGAGGGTTTAATTTGATCCTTTCCGGAGAATTTGATTCTCTTCCCGAACAGGCCTTTTAC  
TTAGTGGGTAACATCGATGAAGCTACTGCGAAGGCTACGAACTTAGAA-----ATGGAG---AGTAAATTGAAGAAA--  
-  
ATGACCTTAAATCTTTGTGTACTGACTCCGAATCGAATTGTTTGGGATTGAGAAGTAAAAGAAATCATTTTATCTACTAA  
TAGTGGACAAATTGGTGTATTAGCAAACCACGCGCCGATTGCCACAGCTGTTGATATAGGTATTTTGAAAATACGC---  
CTT-----GCTAAC---  
CAATGGTTAACGATGGCTCTGATGGGCGGTTTTGCTAGAATAGGCAATAATGAAATCACTATTTTAGTAAATGATGCAGA  
GAAGAATAGTGACATTGATCCACAAGAAGCTCAGCAAACCTTGAATAGCAGAAGCTAACTTGAGAAAAGCTGAAGGTA  
AGAGACAGACAATTGAGGCTAATCTAGCTCTCAGACGAGCTCGGACACGAGTTCGAGGCTCTCAATACGATT-----  
-----ATGAAAATTTAACCGATTCTTTTCGTTTAC---TTG---  
GGTCACTGGCCATCCGCCGGGAGTTTCGGATTT---  
AATACCGATATTTAGCAACAATCCAATAAATCTAAGTGTAGTTTTTCGGTGTATTGATCTTTTTTTGAAAAGGGAGTG--  
-----  
TTAAATGATTTATTAGATAACCGAAAAGCAGAGGATATTAAATACTATTTCGAAATTCAGAAGAAGTTCGCTGAAGGAGCTAT  
TCAACAATTAGAAAATGCCCGGGCGCGCTTGCCTAACGTAGAAACGGAAGCGGATAAGTTTTCGCGTGAATGGATACTCTG  
AAATCGAACGAGAAAAATTGAATTTGATTAATTCAACTTATAAACTTTGAAACAATTAGAAAATTACAAAAATGAAACC  
ATTCTTTTTGAGCAACAAAGAACAATTAATCAAGTCCGCGAACGGTTTTTCCAACAAGCTTTACAAGGAGCTATAGGAAC  
CCTAAATAGTTGTTTTG-----  
AGTAATGAGTTACATTTACGTACTATTAATGCAAATATTGGGATGTTTGGTACGATGAAA-----GAAATA---  
ACTGAT---  
ATGAATCCACTGGTTTTCTGCTGCTTCGGTTATTGCTGCTGGGTTGGCTGTTGGGCTTGCTTCTATTGGACCTGGAGTCGG  
TCAAGGTACAGCTGCGGGTCAAGCTGTGCAAGGTATCGCGAGACAACCTGAGGCAGAAGGAAAATACGAGGTACTTTAT  
TGCTTAGTTTTGGCTTTTTATGGAAGCTTTAACAATTTATGGCCTGGTTGTAGCATTAGCGCTTTTATTTGCGAATCCTTT  
GTT---ATGAATGTTTTA-----TCATGTTCCATCAACACACTAATAAAAAGAAGGGTTA---  
TATGAGATATCTGGTGTAGAAGTAGGCCAACATTTCTATTGGCAAATAGGGGTTTTCCAGGTCCATGCCCAAGTTCTTAT  
TACTTCTTGGGTTGTAATTGCTATCTTATTAGGTTCGCGAGTTCTAGCGATT---  
CGCAATCCACAACAATCCAACCTGACGGCCAAAATTTCTTTGAATTTGTCTTGAATTCATTCGAGACGTGAGTAAAAC  
CCAGATTGGA---  
GAAGAATATGGTCCATGGGTTCCCTTTATTGGAACCTGTTTTTATTATTTTTTGTTCCTAACTGGTTCAGGAGCCCTTTT  
ACCGTGGAAAATTTACAGTTACCTCAAGGGGAGTTAGCAGCACCAACGAATGATATAAATACGACGGTTGCTTTAGCTT  
TACTCACATCAGTAGCCTATTTTTTATGCGGGGCTTAGCAAAAAGGATTAGGGTATTTTCAGTAAATACATTCAACCAACC  
CCAATTTTACCATTAAACATCTTAGAAGATTTTACAAAACCCTATCACTTAGTTTTCGACTTTTCGAAATATATT  
AGCCGATGAATTAGTCGTTGTTGTTCTTGTTCCTTTAGTACCTTTAGTGGTTCCTATACCTGTTATGTTCTTGGATTAT  
TTACAAGCGGGATTCAAGCTCTCATTTTTGCCACTTTAGCTGCGGCTTATATAGGTGAGTCTATGGAAGGTCATCAT---  
---  
ATGATTTTTTCAATTTTAGAGCATATATTAACCTCATATATCTTTTTTCGGTCTGTTTCAATTGTGCTGACAATTTATTTTTT  
AACT-----TTATTA---  
GTTAATTTAGATGAAATCATAGGATTTTTTGGATTATCATAGATAAAGGAATCATAATTACGTTTTTTGGTATAACAGGATT  
ATTATTAACCTCGTTGGATTTTATTCCAGGACATTTCCATTAAAGTAATTTATATGAATCATTAAATTTTTCTTTTCGGTGGGCTT  
TTCAATTTATTCATATGGTTTCCTAT-----TTAATAAAAAACAACAAAATAAG---



TTAAACACAATAACTGCGCCAAGTGTATTTTTATTTCAGGGTTTTGCTACTTCAGGTCTTTTAAACAAAATGCCTCAGTC  
TGCAATATTAGTACCAGCTCTCCAGTCCCAGTGGTTAATGATGCACGTAAGTATGATGATATTAGGCTATGGCGCTCTGT  
TATGCGGATCATTATTATCAATAGCTCTTCTAGTGATTACATTTTCGCAAAGTC---  
GGACCTACTTTTTGGAAAAAGAATATAAAAAAAAAATTTT-----  
TTATTAATGAATTATTTTCTTTTGATGTACTTTACTACATAAAT-----GAAAGA-----  
AATTCTATTTTACTACAACAA-----AACATTAAT-----TTTAGT-----  
TTTTCTAGAAATTATTATAGGTATCAACTGATTCAACAATTAGATTTTTGGAGTTTTTCGTATTATTAGTCTTGGATTTAT  
CTTTTTAACCGTCGGCATTCTTTCAGGAGCTGTCTGGGCTAATGAGACATGGGGTTCATATTGGAAGTGGGACCCAAAAG  
AAACTTGGGCATTTATTACTTGGACTATATTTCGCAATTTATTTACATATTTAAAACA-----  
AATAGGAATGTTAGGGGT-----  
ATAAATCTGCAATTGTGGCTTTGATCGGTTTTATTTAATTTGGATATGCTATTTTGGCGTCAATCTTTTAGGAATAGG  
TTTACATAGTTATGGTTCATTT-----ACATCGAAT-----  
-----ATG---GCAAAAAAG-----  
-----AAAGCATTCAATTCCTTTTTTT-----TATTTTCTATCTATAGTCTTT-----  
TTGCCCTGGTTGATCTCTCTCTGCTGT-----  
AATAAAAGTTTTGAAAAGTGGATTACTAATTGGTGGAACTACTAGACAATGCGAAACTTTTTTGAATGATATTCAAGAAAA  
AAGTTTTCTAGAAAAATTCATACAATTAGAGGAACTATTCCAGCTC-----  
GATGAAATGATAAAGGAA---  
TACCCAGAAACCAATTTACAACAATTTCTGCTAGGAATCCACAAAGAAACGATCCAATTCATCAAGATACACAATGAGTA  
TAATATCCATACAATCTTGCATTTCTCGACAAATCTAATATCTTTTCGTTATTCTAAGTGGTTATTCTTTTTGGGGTAAGG  
AAAAGCTTTTTATTCTGAATTTCTGGGTTCAAGAATTCCTATATAATTTAAGTGATACAATTAAGCTTTTTTCGATTCTT  
TTATTAAGTGAATTTATGATCGGATTCATTTCGCTCACGGTTGGGAATAATGATTGGTTATATTTACAAAGATTTTGG  
GTTTGCTCATTATGAGCAA-----  
ATTTTATCTGGTCTAGTTTCTACCTTTCCAGTAATTTCTTGATACAATTTTTAAATATTGGATTTTTCGTTATTTAAATCG  
TGTATCTCCGTCACCTTGTAGTGAATTTATCATGCAATAAACGAC-----  
ATGCCTATTGGCGTTCAAAAGTACCTTTTCGAAGTCT-----  
-----GGAGAAGGAGAT-----  
--ACATCTTGGGTTGACATATACAACCGACTTTATCGAGAAAGATTATTT---  
TTTTTAGGCCAAGAGGTTGATACCGAAATCTCGAATCAAC

Atropa

TGTTAATGAGCAAGACGTAATTTCTATTTATTGACAATATCTTCCGTTTTCGTCCAAGCAGGATCCGAAGTATCGGCCTTAT  
TGGGTAGAATGCCTTCCGCTGTGGGTTATCAACCGACCCTGAGTACCGAAATGGGTTCTTTACAAGAAAGAATTACTTCT  
ACCAAAGAAGGGTCCATAACCTCTATTCAAGCCGTTTATGTACCCGCAGACGATTTGACCGACCCTGCTCCTGCTACGAC  
ATTTGCACATTTAGATGCTACTACCGTACTATCAAGAGGATTGGCTGCCAAAGGTATTTATCCAGCAGTAGATCCTTTAG  
ATTCACCGTCAACCATGCTTCAACCTCGGATCGTTGGTGAGGAACATTACGAAACCGCCCAAAGAGTTAAGCAAACCTTTA  
CAACGTTACAAAGAAGTTCAGGACATTATAGCTATCCTTGGATTGGACGAATTTCCGAAGAGGATCGTTTACTCGTAGC  
AAGAGCGCGAAAAATTGAGCGTTTCTTATCACAACCTTTTTTCGTAGCAGAAGTATTTACCGGTTCTCCAGGGAAATATG  
TTGGTCTAGCAGAAACAATTCAGGATTTCAATTGATCCTTTCCGGAGAATTAGATGGTCTTCTGAACAGGCCTTTTAT  
TTGGTAGGTAATATCGATGAAGCTACCGCGAAGGCTATGAACCTAGAA-----ATGGAG---AGCAATTTGAAGAAA--  
-

ATGACCTTAAATCTTAGTGTACTGACCCCTAATCGAATTGTTTGGGATTCAGAAGTGGAAAGAAATCGTTTTATCTACTAA  
TAGTGGTCAAATTTGGCATATTATCAAATCACGCCCTATTGCCACAGCTGTAGATATAGGGATTTTGGAGAATACGC---  
CTT-----

AACGACCAATGGTTAACGATGGCTCTGATGGGTGGTTTTGCTAGAATAGGCAATAATGAAATCACTGTTTTAGTAAATGA  
TGCGGAGAAGGGTAGTGACATTGATCCACAAGAAGCTCAGCAAACCTTTGAAATAGCGGAAGCTAATGTGAAAAAGGCTG  
AAGGAAGGAGACAAAAAATTGAGGCAAATCTAGCTCTCCGACGAGCTAGAACACGGGTGGAGGCTATCAATCCGATTTCA  
-----ATGAAAAACGTAACCGATTCTTTTCGTTTTCT---TTG---

GGCCACTGGCCATCTGCCGGGAGTTTCGGGTTT---

AATACCGATATTTTAGCAACAAATCCAATAAATCTAAGTGTAGTCCTTGGTGTATTGATTTTTTTTTGGAAAGGGAGTG--  
-----

TTAAGTGATTTATTAGATAATCGAAAACAGAGGATCTTGAATACTATTTCGAAATTCAGAAGAAGTGCCTGAAGGGGCTAT  
TGAACAACCTCGAAAAGCTCGTTCTCGCTTACGGAAAGTAGAAACCGAAGCCGAGCAGTTTCGAGTGAATGGATACTCCG  
AGATAGAACGAGAAAAATTGAATTTGATTAATTCAACTTATAAGACTTTGGAACAATTAGAAAATTACAAAAACGAAACG  
ATTCAGTTTTGAACAACAAAGGGCGATTAATCAAGTCCGACAACGGGTTTTCCAACAAGCCTTACGAGGAGCTCTAGGAAC  
TCTGAATAGTTGTTTTG-----

AACAACGAGTTACATTTACGTACCATTAGTGCCAATATTGGCATGTTGGGAACAATGAAA-----GAAATA---  
ACTGAT---

ATGAATCCACTGGTTTTTGGCCGCTTCCGTTATTGCTGCTGGATTGGCCGTAGGGCTTGCTTCTATTGGACCTGGAGTTGG  
TCAAGGGACTGCTGCGGGTCAAGCTGTAGAGGGTATCGCGAGACAGCCTGAGGCAGAGGGAAAAATACGAGGTACGCTAT  
TGCTTAGTCTAGCTTTTATGGAAGCTTTAACAATTTATGGACTGGTTGTAGCATTAGCACTTTTATTTGCAAATCCTTTT  
GTT---ATGAATGTTCTA-----TCATGTTCCATCAATACTCTA---AAG---GGGTTA---  
TACGATATATCCGGTGTGGAAGTAGGCCAACATTTCTATTGGCAAATAGGGGGTTTCCAAGTACATGGCCAAGTACTTAT  
TACTTCTTGGGTTGTAATTGCTATCTTATTAGGTTCCAGCCACTATAGCTGTT---  
CGGAACCCACAAACCATTCCGACCGGGGTGAGAATTTCTTCGAATATGTTCTTGAATTCATTGAGATGTGAGTAAAC  
TCAAATTGGA---  
GAAGAATATGGGCCCTGGGTTCTTTTATTGGCACTATGTTTTTATTTATTTTTTGTCTAATTGGTCAGGAGCTCTTTT  
ACCTTGGAAAATCATAACAATTACCTCATGGGGAGTTAGCCGCACCCACGAATGATATAAATACTACTGTTGCTTTGGCTT  
TACTCACATCAGTGGCATATTTCTATGCGGGTCTTACAAAAAAGGATTAGGTTATTTTCGAAAATATATTCAACCAACC  
CCAATCCTTTTACCATTAAACATCTTAGAAGATTTACAAAAACCTTTATCACTTAGTTTTTCGACTTTTTCGGAATATCTT  
AGCTGATGAATTAGTAGTTGTTGTTCTTGTTCCTTTAGTACCTTTAGTAGTTCCTATACCTGTCATGCTCCTTGGATTAT  
TTACAAGTGGTATTCAAGCTCTTATTTTTGCAACTTTAGCCGCGGCTTATATAGGTGAATCCATGGAAGGCCATCAT---  
---  
ATGATATTTTCAACCTTAGAGCATATATTAACCTCACATTTCTTTTTCGATCGTTTTCAATTGTAATTACAATTCATTTGAT  
AACC-----TTTTTA---GTC-----  
GATGAAATCGTAAAACCTATACGATTCGTCAGAAAAGGGCATAATAGTTACTTTTTTCTGTATAACAGGATTATTAGTTAC  
TCGTTGGATTTCTTCGGGACATTTCCCACTAAGCGATTTATATGAATCATTATTTTCTTTTCATGGAGTTTCTCCCTTA  
TTCATATAAATCCGTAT-----TTTTAA---AACAATGTTTTAATT---  
TTAAGTAAAATAACTGGCCCAAGTGCTATTTTTACCCAAGGCTTTGCTACTTCAGGTATTTAACTGAAATACACCAATC  
TGGAATATTAGTACCTGCTCTTCAATCCGAGTGGTTAATAATGCACGTAAGTATGATGATATTGGGCTATGCAGCCCTTT  
TATGTGGATCGTTATTATCAGTAGCACTTCTAGTGATTACATTTGAAAAAAC---AGAAAGCTTTTTTTAT-----  
AAGAGCAATGGTTTT-----GTA---AACGAGTCATTTTTATTGGGTGAA-----  
-----AATGTTTTA-----GAA-----AATACTTCT-----TTT-----  
TCTGCTAAAAATTATTACAGGTCCCAATTGATTCAACAATTGGATTATTGGAGTTATCGGGTTATTAGTTTAGGATTTAC  
TTTTTTAACCATAGGAATCCTTTTCGGGAGCGGTATGGGCTAATGAAGCGTGGGGTTCGATTGGAATTGGGACCCAAAAG  
AAACTTGGGCATTTATTACTTGGATCGTATTTGCAATTTATTTACATACTCGAACA-----  
AATATAAATTTACGGGGT-----  
GCAAATTCGCAATTATAGCAACTATAGGTTTTCTTATAATTTGGATATGCTATTTTGGGGTCAATCTATTAGGAATAGG  
GTTACATAGTTATGGTTCTTTTACATCAACATTTAAT-----  
-----ATG---GCAAAAAAG-----  
-----AAAGCATTCACTCCTCTTTTC-----TATCTTGCATCTATAGTATTT-----  
TTGCCCTGGTGGATTTCTTTCTCAGTT-----  
AATAAATGTCTGGAATCTTGGGTTACTAATTGGTGGAACTACTGGGCAATCCGAAATTTTTTTGAATAATATTCAAGAAAA  
GAGTCTTCTAGAAAAATTCATAGAATTAGAGGAACTCCTCCTCTTG-----  
GACGAAATGATCAAGGAA---  
TACTCGGAAACACATCTCGAAGAGTTTGGGATAGGAATCCATAAAGAAACGATCCAATTAATCAAGATACAAAATGAGAA  
TCGTATCCATACGATTTTGCATTTCTCGACAAATATAATCTGTTTTATTATTCTAAGCGGGTATTCAATTTTGGGTAATG  
AAAAACTTGTATTCTTAACTCTTGGGCTCAGGAATTTCTATATAACTTAAAGTACACAGTAAAAGCTTTTTCTATTCTT  
TTATTAACCTGATTTATGATTGGATTCCATTCACCCACGGTTGGGAATTAATGATTGGCTCTATCTATAAAGATTTTGG  
ATTTGTTCAATGATCAA-----  
ATTATATCTGGTCTTGTTCACCTTTCCAGTCATTCTTGATACAATTTTTAAATATTGGATTTTCCGTTATTTAAATCG  
TCTGTCTCCGTCACCTGTAGTTATTTATCATTCAATGAATGAC-----  
ATGCCTATTGGTGTTCAAAAGTTCTTTCCGAAGTCT-----  
-----GGAGAGGAAGAT-----  
---GCATCTTGGGTTGACGTATACAACCGACTTTATCGAGAAAGATTACTT---

Buxus

TGTTAATGAACAAGACGTACTTCTATTTATCGACAATATTTCCGTTTTCGTCCAAGCAGGATCCGAAGTCTCTGCCTTAT  
TAGGCAGAATGCCTTCTGCTGTGGGTTATCAACCTACCCTTAGTACAGAAATGGGTTCTTTGCAAGAAAGAATTACTTCT  
ACCAAAGAAGGATCCATAACTTCTATTCAAGCAGTTTATGTACCTGCGGACGATTTGACCGACCCCGCTCCTGCCACGAC  
ATTTGCGCATTTAGATGCTACTACCGTACTATCAAGAGGATTGGCTGCCAAAGGTATCTATCCAGCGGTAGATCCGTTAG  
ATTC AACGTCAACTATGCTCCAACCTCGGATCGTTGGTGAGGAACATTATGAAACGGCGCAAAGGGTTAAGCAAACCTTTA  
CAACGTTACAAAGA ACTTCAAGACATTATAGCTATCCTTGGGTTGGACGAATTATCCGAAGAGGATCGTTTAAACCGTAGC  
AAGAGCAAGAAAAATTGAGCGTTTCTTATCACAACCTTCTTCGTAGCAGAAGTATTTACCGGTTCTCCAGGGAAATATG  
TTGGTCTAGCGAAACAATTAGGGGGTTTCAATTGATTCTTTCCGGAAGATTAGATGGTCTTCTGAGCAGGCCTTTTAT

TTGGTAGGTAACATCGATGAAGCTACCGCGAAGGCTATGAACTTAGAA-----GTGGAG---AGCAAATTGAAGAAA--  
-  
ATGACCTTAAATCTTTGTGTACTGACTCCTAATCGAATTGTTTGGGATTGAGAAGTGAAGAAATCATTTTATCTACTAA  
TAGTGGGCAAATTGGAGTATTACCAAATCACGCCCTATTGCCACAGCTGTAGATATAGGTATTTTGAGAATACGA---  
CTT-----  
AATGACCAATGGGTAACGATGGCTCTGATGGGCGGTTTCGCTAGAATAGGCAATAATGAGATCACTATTTTAGTAAATGA  
TGCGGAGAAGAGTAGTGACATTGATCCGCAAGAAGCTCAGCGAACTCTTGAAATAGCTGAAGCTAACTTGAGGAGAGCTG  
AAGGCAAGAGACAAACAATTGAGGCGAATCTAGCTCTCAGACGAGCTAGGACGCGAGTAGAGGCTATCAATGTAATTTTCG  
-----ATGAAAAATGTAACCGATTCTTTTCGTTTC---TTG---  
GTTAACTGGCCATCCGCCGGGAGTTTCGGGTTT---  
AATACCGATATTTTAGCAACAAATCCAATAAATCTAAGTGTAGTGCTTGGTGTATTGATCTTTTTTGGAAAGGGAGTG--  
-----  
TTAAGTGATTTATTAGATAATCGAAAACAGAGGATCTTGAGTACTATTCGAAATTCAGAAGAAGTACGTGTAGGGGCCAT  
TGAACAGCTGGAAAAAGCCCGGGCCCGCTTACGGAAGTTGAAATGGAAGCAGATGAATTTTCGAGTGAATGGATACTCTG  
AGATAGAACGAGAAAAATTAATTTGATTAATTCAACTTATAAGAATTTGGAACGATTAGAAAATTACAAAAATGAAACC  
ATTCATTTTGAACAACAAAGAGCGATTAATCAAGTCCGACAACGAGTTTTCCAACAAGCCTTACAGGGAGCTCTAGGAAC  
TCTAAATAGTTGTTG-----  
AACAACGAGTTACATTTACGCACTATCAGTGCTAATATTGGCATGTTTGGGCGCATGAAA-----GAAATA---  
ACCGAT---  
ATGAATCCACTGATTTCTGCCGCTTCTGTTATTGCTGCTGGATTGGCCGTAGGGCTTGCTTCTATTGGACCCGGAGTTGG  
TCAAGGTACTGCTGCGGGCCAAGCCGTAGAAGGTATCGCGAGACAGCCAGAAGCGGAGGGTAAAATACGAGGTACTTTAT  
TGCTTAGTCTGGCTTTTATGGAAGCTTTAACAATTTATGGACTGGTCTGGCATTAGCGCTTTTATTTGCGAATCCCTTT  
GTT---ATGAGTGTCTA-----CCATGTTCCATCAATACACTA---AAA---GTGTTA---  
TATGATATATCCGGTGTGGAAGTAGGACAACATTTCTATTGGCAAATAGGAGGTTTCCAAGTCCATGCCCAAGTACTTAT  
TACTTCTTGGGTGCTAATTGCTATCTTATTAGGTTTCAGCCACTATAGCTGTT---  
CGGAATCCACAAACTATTCCGACTGACGGTCAGAATTTCTTCGAATATGTCCTTGAATTCATTTCGAGACTTGAGCAAAAC  
TCAGATTGGA---  
GAAGAATATGGCCCTTGGGTTCCCTTTATTGGAACATGTTCCATTTATTTTTGTTTCTAATTGGTCAGGGGCCCTTTT  
ACCTTGGAAAATCATAACAGTTACCTCATGGGGAGTTAGCCGCACCCACCAATGATATAAATACGACTGTTGCTTTAGCTT  
TACTCACGTCAGTAGCATATTTCTATGCGGGTCTTACCAAAAAAGGGTTGGGTTATTTTCGGTAAATACATTCAACCAACT  
CCAATCCTTTTACCAATTAACATACTAGAAGATTTACAAAAACCTTTATCACTTAGTTTTTCGACTTTTCGGGAATATATT  
AGCTGATGAATTAGTAGTTGTTGTTCTTGTTCCTTTAGTACCTTCAGTTGTTCCCTATACCTGTCATGTTCCCTGGATTAT  
TTACAAGTGGTATTCAAGCTCTTATTTTTGCAACTTTAGCCGCGGCTTATATAGGCGAATCCATGGAGGGTCATCAT---  
---  
ATGATATTTTTGACCTTAGAACATATATTAACCTCACATCTCTTTTTTCGATCGTTTTCAATTGTAATTACGATTCATTTGAT  
AACC-----CTATTA---GTC-----  
GATGAAATCGTAGGACTATATGATTCGTTAGAAAAAGGCATGATATCCACTTTTTTATGTATAACAGGATTATTAGTTAC  
TCGTTGGATTTATTCGGGGCATTACCATTAAGTAATTTATATGAATCATTAACTTCCCTTTCATGGAGTTTCTCCATTA  
TTCATATGATTCGGTAT-----TTTAAA---AACCATAAAAAATCAT---  
TTAAGCCTAGTAACCGCGCCAAGTGCTATTTTTACCCAAGGCTTTGCCACTTCGGGTCTTTAACCGAAATGCATCAATC  
CGCAATATTAGTACCTGCTCTACAATCCCAGTGGTTAATGATGCATGTAAGTATGATGGTATTGAGCTATGGAGCTCTTT  
TATGTGGATCATTATTATCAGTAGCTCTTCTAGTCATTACATTTGAAAAAAC---ATAGATATTTTTGGT-----  
AAAAGAAATCATTTA-----TTA---ATAGGGTCATTTTCCCTTGGTGAGATCCAATACACGAAT-----  
GAAAGA-----AGTAATGTTTTA-----CGA-----AACGTTTCT-----TTTCTT-----  
-  
TCCCTTAGAAATTATCGCAGATATCAATTGATTCGGCAATTGGATAAATTGGAGTTATCGTGTTATTAGTCTAGGGTTTAT  
TTTTTTAACCATAGGTATTCTTTTCGGGAGCAGTATGGCCAATGAGGCATGGGGATCATATTGGAATTGGGACCCTAAAG  
AAACTTGGGCATTTATTACTTGGACCATATTCGCTATTTATTTACATACTCGAACA-----  
AATAAAAAATTTTCAAGGT-----  
GCAGATTCGCAATTGTGGCTTCTATTGGATTTATCATAAATTGGATATGCTATTTTGGGGTCAATCTATTAGGAATAGG  
TCTACATAGTTATGGTTCATTCTACTAACATCTAAT-----  
-----ATG---GCAAAAAAG-----  
-----AAAGCATTCACTTCCCTTCCA-----TATCTTGCATCTATAGTTTTTT-----  
TTGCCCTGGTGGATCTCTCTCATT-----  
AATAAATGGCTGGAATCTTGGGTTACTAATTGGTGGAAATACTAGGCAATCCGAAACCTTTTTGAATGATATTCAAGAAAA  
GAACATTTTAGAAAAATTCATAGAATTAGAAGAACTATTCCTCTTG-----  
GACGAAATGATAAAGGAA---TACCCGGAGACACATATACAAAGG-----

AGAATCCACAAAGAAACGATCCAATTAGTCAAGATGCACAATGAGAGTCATATCCATACGATTTTGCACCTCTCGACAAA  
TATAATCTGTTTCGCTATTCTAAGCGGTTATTCTATTCTGGGTAATGAAGGACTTTTTATTCTTAATTCTTGGGTTTCAGG  
AATTCCTATATAACTTAAGCGACACAATAAAAGCTTTTTCTATTCTTTTATTAAGTATGTTATCGGATTCCACTCA  
CCCCATGGTTGGGAACATAATGATTGGCTCTGTCTACAAAGATTTTGGATTTGCTCATAACGATCAA-----  
ATTATATCTGGTCTTGTTCCTTTCCAGTCACTTAGATACAATTTTAAAATATTGGATCTTTCGTTATTTAAATCG  
TGTATCTCCGTCACCTTGTAGTGATTTATCACTCAATGAATGAC-----  
ATGCCTATTGGTGTTCACAAAGTCCCTTTTCGGAATCCT-----GGAGAGGAAGAT-----  
-----GCAGTTTGGGTTGACGTATAACAACCGACTTCATCGAGAAAGATTACTT---  
TTTTTAGGCCAAGAGGTTGATAGCGAGATCTCGAATCAAC  
Calycanthus  
TGTTAATGAACAAGACGTAATTCTATTTATCGACAATATCTTCCGTTTCGTCCAAGCAGGATCAGAAGTATCCGCCTTAT  
TAGGTAGAATGCCTTCCGCTGTGGGTTATCAACCTACCCTTAGTACAGAAATGGGTTCTTTGCAAGAAAGAATTACTTCT  
ACCAAAGAGGGGTCTATAACTTCCATTCAAGCAGTTTATGTACCTGCGGACGATTTGACCGACCCTGCTCCTGCTACGAC  
ATTTGCACATTTAGATGCTACTACCGTACTATCAAGAGGATTAGCTGCCAAGGGTATCTATCCAGCAGTAGATCCTTTAG  
ATTCAACGTCAACTATGCTCCAACCTAGGATCGTTGGTGAGGAACATTATGAAATTGCGCAAAGAGTTAAGCAAACCTTCA  
CAACGTTACAAAGAACTTCCAGGACATTATAGCTATCCTTGGGTTGGACGAATTATCCGAAGAGGATCGTTTAAACAGTAGC  
AAGAGCACGAAAAATTGAGCGTTTCTTATCACAACCGTTCTTCGTAGCAGAAGTATTTACTGGTTCCCGAGGGAAATACG  
TTGGTCTTGGCGAAACAATTAGGGGGTTTCAACTGATCCTTTCCGGAGAATTAGATGGTCTTCCCGAACAGGCCTTTTAT  
TTGGTGGGTAACATCGATGAAGCTACCGCGAAGGCTATGAACCTAGAA-----GTAGAG---AGCAAATTGAAGAAA--  
-  
ATGACCCTAAATCTTTGTGTACTGACTCCTAATCGAATTATTTGGGATTGAGAAGTGAAGAAATCATTATCTACTAA  
TAGTGGCCAAATTTGGCGTATTACCCAATCACGCCCTATTGCCACAGCTGTAGATATAGGTATTTTGAGAATACGC---  
CTC-----  
AACGGCCAATGGTTAATGATGGCTGTAATGGGCGGTTTCGCTAGAATAGGCAATAACGAGATCACCATTTTAGTAAATGA  
TGCAGAGAAGGGTAGTGACATTGATCCACAAGAAGCTCAGCGAACTCTTGAAATAGCTGAAGCTAACTTGAGTAAAGCTG  
AAGGCAAGAGACAAGTCAATTGAGGCGAATCTAGCTCTTAGACGAGCTAGAACACGAGTAGAGGCTATCAATGTTATT---  
-----ATGAAAAATGTAACCGATTCTTTTCGTTTCC---TTG---  
GGTCACTGGCCATTTCGCTGGGAGTTTCGGGTTT---  
AATACCGATATTTTAGCAACAAATCTAATAAATCTAAGTGTAGTGCTTGGTGTATTGATCTTTTTTTGGAAAGGGAGTG--  
-----  
TTAAGTGATTTATTAGATAATCGAAAACAGAGGATCTGGAGTACTATTCGAAATTCAGACGAACTACGTGAGGTAGCCAT  
TGAGCAGCTCGAAAAAGCCCGGGCTCGCTTACGGAAGTGGAAAGAGAAGCAGATGAGTTTCGAGTGAATGGATACTCTG  
AGATAGAACGAGAAAAATGGAATTTGATTAATGCCACTTATGAGAATTTGGAACGATTAGAAAATTACAAAAATGAAACC  
ATTCATTTTGAACAACAAAGAGCAATTAATCAGGTCCGGCAACGAGTTTTCCAACAAGCCTTACAAGGAGCTCTAGGAAC  
TCTGAATAGTCTGTTG-----  
AACAGCGAGTTACATTTACGCACTATCAGCGCTAATATTGGCATGCTCGGGGCCATGAAA-----GAAATA---  
ACTGAT---  
ATGAATCCACTGATTTCTGCCGCTTCCGTTATTGCTGCTGGATTGGCTGTAGGGCTTGTCTTATTGGGCCTGGAGTTGG  
TCAAGGTACTGCTGCAGGCCAAGCCGTAGAAGGTATCGCAAGACAACCAGAAGCAGAGGGTAAAATACGAGGTACTTTAT  
TGCTCAGTCTGGCTTTTATGGAAGCTTTAACAATTTACGGACTGGTCTGGCATTAGCGCTTTTATTTGCGAATCCTTTT  
GTT---ATGAATGTTCTA-----CCCTGTTCTATCAACACACTA---AAA---GGGTTA---  
TACGATATATCCGAAGTGGAAAGTAGGTCAACATTTCTATTGGCAAATAGGGGGTTTCCAAGTCCATGCCCAAGTACTTAT  
CACTTCTTGGGTTGTAATTGCTATTTTATTAGGCTCGGCCGCTATAGCTGTT---  
CGTAATCCACAAACCATTCCAACCGACGGTCAGAATTTCTTCGAATATGTCCTTGAATTCATTTCGAGACTTGACCAAAC  
TCAGATTGGA---  
GAAGAATATGGTCCTTGGGTTCCCTTTATTGGAACATGTTCCATTTATTTTTGTTTCTAACTGGTCGGGTGCTCTTTT  
ACCCCGGAAAATCATAACAGTTACCGCATGGAGAGTTAGCCGCACCCACGAATGATATAAATACTACTGTTGCTTTAGCTT  
TACTTACGTCAGTGGCATAATTTCTATGCGGGTCTTACCAAAAAAGGATTGGGTTATTTTGGTAAATACATTCAACCAACT  
CCAATACTTTTACCAATTAACATCCTAGAAGATTTACAAAACCTTTATCACTTAGTTTTGACTTTTTCGGGAATATATT  
AGCTGATGAATTAGTAGTTGTTGTTCTTGTCTTTAGTACCTTTGGTGGTTTCTTATACCTGTCTGTTCTTGGATTAT  
TCACAAGCGGGATTCAAGCTCTTATTTTTGCAACTTTAGCCGCGGCCTATATAGGTGAATCCATGGAAGGTCATCAT---  
---  
ATGATATTTTCAACTTTAGAACATATCTTAACTCATATCTCTTTTTCTATCATTTCAATTGTCATTACGATTCAATTTGCT  
GAAC-----TTATTA---GTC-----  
CATGATACCGTAGGACTATGTGATTCGTACAGAAAAGGCATGATGGCTACTTTTTTCTGTATAACAGGATTATTAGTTAC  
TCGTTGGATTTATTCTAGGCATTTTCCGTTAAGTGATTTATACGAATCCTTGATGTTCTTTTCATGGAGTTTCTCTATTA

TTCATATGGTTCCATAT-----TTTAGG---AACCATAAAAAATTCT---  
TTAAGCGCAATAACCGCGCCAAGTGCTATTTTTACCCAAGGCTTTGCCACTTCAGGTCTTTAACTGAAATGCATCAATC  
TGCAATATTAGTACCCGCTCTACAATCCCAGTGGTTAATGATGCACGTAAGTATGATGTTATTGGGTTATGCATCTCTTT  
TATGTGGATCGTTATTATCAGTAGCTCTTTTAGTCATTACATTTTCGAAAAACC---TTAGGTATTCTGGT-----  
AAAAACAATCATTTT-----TTA---ATTGGGTCATTTCCCTTTGGCGAGATACGCTACTTCAAT-----  
GAAAAA---AGAAAAAGAAGTGTTTTA-----AAA-----AAAACATCT-----TTTTTT-----  
-

TCATTTAGAAATTATCACAGGTATCAATTGACTCAGCGATTGGATCATTGTAGTTATCGTATCATTAGTCTAGGGTTTAC  
TTTTTCAACCATAGGTATTCTTTTCGGGAGCAGTATGGGCTAATGAGGCATGGGGTCTTATTGGAATTGGGACCCCAAGG  
AAACTTGGGCATTTATTACTTGGACCATATTCGCAATTTATTTACATACTAGAACA-----  
AATCAGAGATTTCAAGAT-----

GTAGGTCCGGCAATTGTGGCTTCTATGGGATTTCTTATAATTTGGATATGCTATTTTGGGGTCAATCTATTAGGAATAGG  
ACTACATAGTTATGGTTCATTCGCATTAACATCTAAT-----

-----GTG---CCAAAAAAG-----  
-----AAAGCATTGACTCCCTTCCCA-----TATCTTGCATCTATAGTTTTT-----

TTGCCCTGGTGGATCTCTCTCATT-----  
ACCAAAAGTCTGGAACCTTGGGTTACTAATTGGTGGAAATACCGGGCAATCCAAAACCTTTTTTGAATGATATTCAAGAGAA  
GAACGTTCTGGAAAGATTTCATAGAATTAGAACAACCTATTCTGTG-----

GACGAAATGATAAAAGAG---  
TATCCCGAGACACAGATACAAAAGTTTTCATATAGGAATCCACAAAGAGACGCTCCAATTGGTCAAAAATGCACAATGAAGA  
TCATATCCATATCGTTTTGCATTTCTCGACAAATATAATCTGTTTTGCTATTCTAAGTGGTTATTATTTTCTGGGTAATG  
AAGAACTTGTATTCTTAATTCTTGGGTTTCAGGAATTCCTCTATAACTTAAGCGACACAATAAAGGCTTTTTTCGATTCTT  
TTAGTAAGTGAATTTATGTATCGGATTCCACTCACCCCGTGGTTGGGAATAATGATTGGTTCGGTCTACAAAGATTTTGG  
ATTTGCTCATAACGATCAA-----

ATTATATCTGGTCTTGTTCCTACTTTTCCAGTTATTCTAGATACAATTTGAAATATTGGATCTTCCATTATTTAAATCG  
TGTATCCCTTCACTTGTAGTGAATTTATCATTCAATGAATGAA-----  
ATGCCCATGGTGTTCAAAAGTACCTTTTCGGAGTCT-----  
-----GGAGAGGAAGAC-----

--GCGGTTTTGGGTTGACGTATACAACCGACTTCATCGAGAAAGATTACTT---  
TTTTTAGGCCAAGAAGTTGATAGCGAGATCTCGAATCAAC

Ceratophyllum  
TGTTAATGAACAAGATGTACTTCTATTTATCGACAATATCTTCCGTTTTCGTACAAGCGGGATCAGAAGTATCCGCCTTGT  
TAGGTAGAATGCCTTCCGCTGTGGGTTATCAACCTACTCTTAGTACAGAAATGGGTTCTTTGCAAGAAAGAATTACTTCT  
ACCAAAGAGGGATCCATAACTTCCATTCAAGCAGTTTATGTACCTGCGGACGATTTGACCGACCCTGCTCCTGCCACGAC  
ATTTGCACATTTAGATGCTACTACCGTACTATCAAGAGGATTAGCTGCTAAAGGTATCTATCCAGCAGTAGATCCTTTAG  
ATTC AACGTCAACTATGCTCCAACCTCGGATTGTTGGCGAAGAACATTATGAAACTGCGCAAAGAGTTAAGCAAACCTTCA  
CAACGTTACAAAGAACTTCAAGGACATTATAGCTATTCTTGGATTGGACGAATTATCCGAAGAGGATCGTTTAAACCGTAGC  
AAGAGCACGAAAAATGAACTTTCTTATCACAACCTTTTTTCGTAGCAGAAGTATTTACAGGTTCTCCAGGGAAATATG  
TTGGTCTTGCAGAAACAATTAGAGGGTTTTAACTGATCCTTTTCAGGAGAATTAGATAGTCTTCCCAGCAGGCTTTTTAT  
TTGGTAGGTAACATCGATGAAGCTACCGCGAAGGCTATTAACCTTAGAA-----GTGGAG---

AGCAAATCGAAGAAATGAATGACCTTAAATCTGAGTGTACTGACTCCTAATCGAATTATTTGGGATTCAGAAGTCAAAGA  
AATTATTTTATCTACGAATAGTGGAAAAATTGGCGTATTACCAAACCATGCACCTATTGCCACAGCTGTTGATATAGGGA  
TATTGAGAATACGC---CTC-----

AACGACCAATGGTTAACCATGGCTCTGATGGGCGGTTTTCGCTAGAATAGGCAACAATGAGATCACAATATTAGTAAATGA  
TGCAGAGAAGGGTAGTGACATTGATCCGCAAGAAGCTCAACGAACCTTTGAAATAGCGGAAGCTAACTTGAGTAGAGCTG  
AAGGAAAGAGACAAGTAATTGAGGCGAATTTAGCTCTCAGACGAGCTAGGACACGAGTAGAAGCTATCGATGTGATTTTCG  
TAA-----ATGAAAAATGTAACCGATTTCCTTCGTTTTCC---TTG---

GGTACTGGCCATATGCCGGGAGTTTCGCCTTT---  
AATACCGATATTTTAGCAACAAATCCAATAAATCTAAGTGTAGTGCTTGGTGTATTGATCTTTTTTGGAAAGGGAGTG--  
-----

TTAAGTGATTTATTAGATAATCGAAAACAGAAGATTTTGGAGCAGTATTTCGAAATTCGGAAGAATACTGCAAAAAGCCAT  
TGAACAGCTCGAAAAGCCCGGGCTCGTTTACGTAAAGTGGAAATCGAAGCAGATAAGTTTTCGAGTGAACGGATACTCTG  
AGATAGAACGAGAAAAGGGCAATTTGATTAATTCGACTTATGAGAATTTGCAACGATTAGAAAATTACAAGAATGAAGCA  
ATTCAGTTTTGAGCAACAAAGAACGATTAATCAGGTCCGCCAACGGTTTTTCAACAAGCCTTACAAGAGGCCCTAGAAAC  
TTTGAATAGTTGTTTTG-----

AATAGCGAATTACATTTACGTACTATCAGTGCGAATATTGTCTGCTCGGGTTCATGAAA-----GAAATA---  
ACTGATTAGATGAATCCACTGATTTCTTCCGCTTCTGTTATTGCTGCTGGATTGGCCGTAGGCCTTGCTTCTATTGGCCC

TGGAGTTGGTCAAGGTACTGCTGCAGGTCAAGCCGTAGAAGGTATAGCAAGACAACCAGAAGCAGAGGGTAAAATAAGAG  
GTACTTTATTGCTTAGTCTGGCTTTTATGGAAGCTTTAACAATTTACGGACTGGTCTGGCATTAGCACTTTTATTTGCT  
AATCCTTTTGTAAATGAATGTTCTA-----CCATGTTCCATGAACACACTA---AAA---GGTTA---  
TACGAAATATCCGGTGTAGAAGTAGGCCAACATTTCTATTGGCAAATAGGGGGTTTCCAAATCCATGCCCAAGTACTTAT  
TACTTCTTGGGTGCTAATTGCTATATTATTAGGTTTCGGCCGCTATAGCTGTT---  
CGGAATCCACAAACCATTCCGACCGACGGTCAGAATTTCTTCGAATATGTCCTTGAATTCATTTCGAGATTTGAGCAAAAC  
TCAGATTGGT---  
GAAGATTATGGCCCTTGGGTTCCTTTTATTGGAACATATGTTCTTATTTATTTTTGTTTCTAACTGGTCCGGTGTCTTTTT  
ACCTTGGAAAATCATAACAGTTACCTCATGGGGAGTTAGCTGCACCCACGAATGATATAAATAACAACACTGTTGCTTTAGCTT  
TACTCACGTACGCGGCATATTTCTATGCGGGTCTTACCAAAAAAGGATTGGGTTATTTCCGGTAAATACATTCACCAACT  
CCAATTTCTTTACCAATTAACATCCTAGAAGATTTTACAAAACCTTTATCACTTAGTTTTCGACTTTTCGGGAATATATT  
GGCTGATGAATTAGTGGTTGTTGTTCTTGTTCCTTTAGTACCTTTAGTAGTTCTTATACCCGTCATGTTCCCTTGGATTAT  
TCACAAGTGGTATTCAAGCTCTTATTTTTGCAACTTTAGCCGCGGCTTATATAGGTGAATCTATGGAGGGTCATCATTGA  
---  
ATGATATTTGAGACTTTAGAACATATATTAACCTCACATTTCCTTTTTCGATCATTTCATTGTCATTCTGATTTCATTTTCAT  
GGCC-----TTACTA---GGC-----  
CATGAAATCGTAGGACTACGCGATTTCGTCAGAAAAGGGCATGATAGCTACTTTTTTCTGTATAACAGGATTATTAGTTTC  
TCGTTGGAGCTATTCGGGACATTTTCCCTTAAGCAATTTATATGAATCATTAAATGTTCCCTTTCATGGAGTTTCTCCATTA  
TTCATATGGTTCCCTAT-----TTTTGGT---AACCATAAAAATGAT---  
TTAAGCGTAATAACCAACCCAAGTGCTATTTTTACACAAGGCTTTGCCACTTCGGGTCTTTAACCAGAAATGCATCAATC  
TTCAATATTAGTACCTGCTCTACAATCCCAGTGGTTAATGATGCACGTAAGTATGATGTTGTTGAGTTATGCAGCTCTTT  
TATGTGGATCGTTATTATCAGTAGCTCTTCTAGTACATTACATTTTCGACAAAGC---ATAGATCTTTTTTTTT-----  
AAAAGAGATCAATTA-----TTA---ACCGGTGGATTTTCCCTTTGGTGAGATACAATACTTGAAT-----  
GAAAAA-----AGAAGTGTTTTA-----CAA-----AACACTTCT-----TTTCTT-----  
-  
TCATTTAAAAATTATCACAGGTATCAATTGACTCGGCGATTGGATCATTGGAGTTATCGTATTATTAGTTTAGGATTTAC  
CTTTTTAACTATTGGTATTCTTTTCGGGAGCAGTATGGGCTAATGAAGCATGGGGGTCTTATTGGAATTGGGACCCTAAAG  
AAACTTGGGCATTTATTACTTGGACTGTATTTCGCAATTTATTTACATACTAGAACA-----  
AATCAAAATTTTCAAAGT-----  
GCGAATTTCAGCAATTGTGGCCCTCCATGGGATTTTTGATAATTTGGATATGTTATTTTTGGGGTCAATCTATTAGGAATAGG  
GCTGCATAGTTATGGTTCATTC-----ATATCTAATTGA-----  
-----GTG---CCAAAAAAG-----  
-----AAAGTATTGACCCCTTCCA-----TATCTTGCATCTATAGTTTTTT-----  
TTGCCCTGGTGGATCTCTCTCATT-----  
AATAAAAGTTTGGAACTTGGGTTACTAATTGGTGGAAATACAAAACAATCCGAAATTTTCTTGAATGATATTCAAGAGAA  
AAACGTTCTAGAAAGATTTCATAGAATTAGAGGAGCTAGTCTGTTG-----  
GACGAAATGATCAAGGAA---  
TACCCTGAAACACATATACAAAAGCTTCGTATAGGAATACACAAAGAAACAATACAATTGGTCAAAATGCAAAATCAAAA  
TGATATACAGATCATTGTCATTTCTCGACAAATATAATCACTTTAACTATTCTAAGTGGTTTTTTTTATTATGGGTAATG  
AAGAACTTGTCACTTGAATTTCTGGGTTTCAGGAATTTCTTATAACTTAAAGTATAAATAAAAGCTTTTTCTATTCTT  
TTATTAACCTGATTTATGATTGGATTTCACTCGCCCCATGGTTGGGAACATAATGATTGGTTCGATATATAAAGATTTGG  
GTTTGCTCATAATGATCAA-----  
ATCATATCTGGTCTTGTTCGACTTTTCCAGTCACTCTCGATACTATTTTGAATATTGGATCTTCCATTATTTAAATCG  
TGTATCTCCTTCACTTGTAGTGAATTTATCATTCAATGAATGAATGA-----  
ATGCCCATGGTGTTCAAAAGTACCTTTTCGGAGTCCC-----  
-----GGAGAGGAAGAT-----  
--GCTGTTTGGGTTGACATATACAACCGACTTTATCGAGAAAGATTACTT---  
TTTTTAGCCAAGAGATTGATAGCGAAATGTCGAATCAAA

Chloranthus

TGTTAATGAACAAGACGTACTTCTATTTATCGACAATATCTTCCGTTTTGTCCAAGCAGGATCAGAAGTATCCGCCTTAT  
TAGGTAGAATGCCTTCTGCTGTAGGTTATCAACCTACCCTTAGTACAGAAATGGGTTCTTTGCAAGAAAGAATTACTTCT  
ACCAAAGAGGGGTCTATAACTTCCATTCAAGCAGTTTATGTACCTGCGGACGATTTGACCGACCCTGCTCCTGCCACGAC  
ATTTGCACATTTAGATGCTACTACCGTACTATCAAGGGGATTGGCTGCCAAAGGTATCTATCCAGCAGTAGATCCTTTAG  
ATTC AACGTCAACTATGCTCCAACCTAGGATCGTTGGCGAGGAACATTATGAAACTGCGCAAAGAGTTAAGCAAACCTTCA  
CAACGTTACAAAAGAACTTCAGGACATTATAGCTATCCTTGGGTTGGACGAATTATCCGAAGAGGATCGTTTAAACCGTATC  
AAGAGCACGAAAAATTGAGCGTTTCTTATCACAACCTTCTTCGTAGCAGAAGTATTTACTGGTTCTCCAGGAAAATATG  
TTGGTCTTGCAAGAAACAATTAGGGGATTTCAACTGATCCTTTCCGGAGAATTAGATGGTCTTCCCAGCAGGCCTTTTAT

TTGGTAGGTAACATCGATGAAGCTACCGCGAAGGCTATGAACTTAGAA-----GTGGAG---AGTAAATTGAAGAAA--  
-  
ATGACCTTAAACCTTTGTGTGCTGACTCCTAATCGAATTATTTGGGATTGAGAAGTGAAGAAATCATTTTATCTACTAA  
TAGTGGCCAAATTGGCGTATTGCCAAACCACGCCCTATTGCCACAGCTGTAGATATAGGTATATTGAGAATACGC---  
CTC-----  
AACGACCAATGGTTAACGATGGCTCTAATGGGTGGTTTTGCTAGAATAGGCAATAATGAGATCACCATTTTAGTAAATGA  
TGCGGAGAAGGGCAGTGACATTGATCCGCAAGAAGCTCAGCAAACGCTTGAAATAGCGGAAGCTAACTTGAGTCGAGCTG  
AAGGCAAGAGACAAGCAATTGAGGCGAATCTAGCTATCAGACGAGCTAGGACACGAGTAGAGGCTATCAATGTTATTTTCG  
-----ATGAAAAATATAACCGATTCTTTTGTITTC---GTG---  
GGTTACTGGTCATCGGCCGGAAGTTTCGGGTTT---  
AATACCGATATTTTAGCAACAAATCCAATAAATCTAAGTGTAGTGCTTGGTGTATTGATCTTTTTTGGAAAGGGAGTG--  
-----  
TTAAGTGATTTATTAGATAATCGAAAACAAAGAATCTTGAGTACTATTCGAAATTCAGAAGAACTACGTGGAGGAGCTAT  
TGAGCAGCTCGAAAAAGCCCGGGCTCGCTTACGGAAAGTAGAAATGGAAGCAGATGAGTTTTCGAGTGAATGGATATTCTG  
AGATAGAACGAGAAAGGGTGAATTTGATTAATGCCACTTATGAGAATTTGGAACGATTAGAAATTTACAAAAATGAAACC  
ATTCATTTTGAACAACAAAGAGCGATTAATCAGGTCCGACAACGAGTTTTCCAACAAGCCTTACAAGGAGCTCTAGGAAC  
TCTGAATAGTTGTTG-----  
AACAGTGAGTTACATTTACGCACCATCAGTGCTAATATTGGCATGTTCCGGGGCCATGAAA-----GAAATA---  
ACGGAT---  
ATGAATCCATTGATTTCTGCCGCTTCGGTTATTGCTGCTGGATTGGCTGTCCGGCTTGCTTCGATTGGACCTGGAGTTGG  
TCAGGGTACTGCTGCCGGCCAAGCCGTAGAAGGTATCGCGAGACAACCAGAAGCAGAGGGTAAAATACGCGGTACTTTAT  
TACTTAGTCTGGCTTTTATGGAAGCTTTAACAATTTACGGACTGGTCTGGCATTAGCGCTTTTATTTGCGAATCCTTTT  
GTT---ATGAATGTTCTA-----CCATGTTCCATCAACACACTA---AAA---GTGTTA---  
TACGATATATCCGGTGTGGAAGTAGGCCAACATTTCTATTGGCAAATAGGGGGTTTTCCAAGTCCATGCTCAAGTACTTAT  
CACTTCTTGGGTGCTAATCGCTATCTTATTAGGTTAGCTACTATAGCTGTT---  
CGGAATCCACAAACCATTCCGACTGACGGTCAGAATTTCTTCGAATATGTCCTTGAATTCATTGAGATTTGAGCAAAAC  
TCAGATTGGA---  
GAAGAATATGGTCTTTGGGTTCCCTTTATTGGAACATGTTCCATTTATTTTTGTTTCTAACTGGTCAGGTGCTCTTTT  
ACCTCGGAAAAATCATAACAGTTACCTCATGGGGAGTTAGCTGCACCTACGAATGATATAAATACTACTGTTGCTTTAGCTT  
TACCCACGTCAGTGGCATAATTTCTATGCAGGTCTTACCAAAAAAGGATTGGGCTATTTTGGTAAATATATTCAACCAACT  
CCAATCCTTTTACCAATTAACATCCTAGAAGATTTACAAAAACCTTTATCACTTAGTTTTCGACTTTTCGGAAATATATT  
GGCTGATGAATTAGTAGTTGTTGTTCTTGTCTTTAGTACCTTACGTAGTTTCTATACCTGTGATGTTCCCTGGATTAT  
TCACAAGTGGTATTCAAGCTCTTATTTTTGCAACTTTAGCCGCGGCTTATATAGGTGAATCTATGGAGGGCCATCAT---  
---  
ATGATATTTGCGACTTTAGAACATATATTAACCTCACATCTGTTTTTTCGATCATTTTAATTGTCATTACGATTCAATTTGAT  
TACC-----TTATTA---GTC-----CATGAAATA---  
GGACTATATAATTTGTCAGAAAAAGGCATGATAGCTACTTTTTTCTGTATAACAGGATTATTAGTTTTCTCGTTGGATTTA  
TTCAGGACATTTCCCGTTAAGTGATTTATATGAATCATTAAATATTTCTTTCATGGAGTTTCGCTATTATTTCATATGGTTC  
CTAAA-----ATACGG---AACCATCCAAATTCT---  
TTAAGCACAATAACTGCGCCAAGTACTATTTTTACCCAAGGCTTTACCACTTCGGGTCTTTTAACTAAAATGCATCAATC  
TACAATATTAGTACCCGCTCTACAATCCAAATGGTTAATGATGCACGTAAGTATGATGTTATTGAGCTATGCAGCTCTTT  
TATGTGGATCGTTATTATCCATAGCTCTTCTAGTCATTACATTTGAAAAAAC---ATAGATATTTTGGGT-----  
AAAAGTAATCATTTA-----TTT---ATTGGGTCAATTTCCCTTTGGTAAGACCCAATACTTGAAT-----  
GAAAAA-----AGAAGTCTTTTACATTTACAA-----AAGGCTTCT-----TTTCTT-----  
-  
TCATTTAGAAATTATCACAGGTATCAATTGACTCATCGATTGGATTATTGGAGTTATCGTGTGATTAGCCTAGGGTTTAC  
CTTTTTAACCATAGGCATTTCTTTCCGGAGCGGTATGGGCTAATGAGGCATGGGGGTCTTATTGGAATTGGGACCCCAAGG  
AAACTTGGGCGTTTATTACTTGGACCATATTCGCGATTTATTACATACTAGAACA-----  
AATAAAAAGTTTGAAGGT-----  
GCAAATTCGGCAATTGTGGCTTCTATGGGATTTCTTATAATTTGGATATGTTATTTCCGGGTCAATCTATTAGGAATAGG  
GCTGCATAGTTATGGTTCATTACATTAACATCTAAT-----  
-----ATGAAACGTG---  
CCAAAAAGCCAAAAAG-AAAAGAAAGAATCGACCCCTCCCATTTCCCATATCTTGCATCTATAGTATTG-----  
-TTGCCCTGGTGGATTTCTCTTTTCAATTT-----  
AAGAAATGTTTTCGAACCCTGGGTTACTCATTGGTGTAAATACCAGACAATCCAAATTTTTTTTTGAATGATATTCAAGAGAA  
GGGCACTCTAGAAAGATTTCATAGAATTAGAAGAACTATTCCTGTTG-----  
GACAAAATAATAAAGGAGTACTACCCGGACACACATATACAAAGGCTTTGGATAAGAATCCACAAAGAAACGATACAATT

GGTCAAAATTCACAATGAAGATCATAATCATATCATTCTCTCGACAAATATAATTTCTTTCACTATTCTAAGTG  
GTTATTCCATTCTGGGTAATGAAGAGCTTTTTATTCTGAATTCTTGGGTTCCAGGAATTCCTCTATAACTTAAGCGACACA  
ATAAAAGCTTTTTCGATTCTTTTATTACCGATTTATGTATCGGATTCCACTCACCCCATGGTTGGGAACATAATGATTGG  
TTCAATCTACAAAATTTTTGGATTTGCTCATAACGATCAA-----  
GTTATATCGGGTTTTGTTTCCACTTTTTCCAGTCTTTCTAGATACATTTTTCAAATATTTGATCTTCCGTCATTTAAATCG  
TGTATCTCCTTCACTTGTAGTGATTTATGATTCAATAAATGAGGAACCTATTATGCCCATTTGGTGTTCACAAAAGTACCTT  
TTCGGAGTCTT-----GGAGAGGAAGAT-----GCAGTTTGGGTTGACGTA---  
AACCGACTTCATCGAGAAAGATTACTT---TTTTTAGGCCAAGAGGTTGATAGTGAGATCTCGAATCAAC  
Citrus  
TGTTAATGAACAAGACGTACTTCTATTTATCGACAATATCTTCCGTTTTCGTCCAAGCGGGATCCGAGGTATCCGCCTTAT  
TGGGTAGAATGCCTTCCGCTGTGGGTTATCAACCTACCCTTAGTACCAGAAATGGGTTCTTTACAAGAAAGAATTACTTCT  
ACCAAAGAGGGGTCCATAACTTCTATTCAAGCAGTTTATGTACCCGCGGATGATTTGACTGATCCCGCTCCTGCCACGAC  
ATTTGCCCATTTAGATGCTACTACCGTACTATCAAGAGGATTAGCTGCTAAAGGTATCTATCCAGCAGTTGATCCTTTAG  
ACTCAACGTCAACTATGCTGCAACCTCGGATCGTTGGCGAGGAACATTATGAAACGGCGCAAAGAGTTAAGCAAACCTTTA  
CAACGTTACAAAGAACTTCAGGACATTATAGCTATCCTTGGGTTGGACGAACTGTCCGAAGAGGATCGTTTAACTGTAGC  
AAGGGCGGAAAAATGAGCGTTTTCTTATCACAACCCTTTTTCGTAGCCGAAGTATTTACCGGTTCCCGGGGAAATATG  
TTGGTCTAGCCGAAACTATTAGAGGGTTTTAAATTGATCCTGTCCGGAGAATTAGATGGTCTTCTGAGCAGGCCTTTTAT  
TTGGTAGGTAACATAGATGAAGTTACTGCGAAGGCTACAACTTAGAA-----ATGGAG---AGTAATTTGAAGAAA--  
-  
ATGACCTTAAATCTTTGTGTACTGACCCCTAATCGAATTGTTTGGGATTGAGAAGTGAAGAAATCATTTTATCTACTAA  
TAGTGGACAAATCGGCGTATTACCAAATCACGCGCCTATTGCCACAGCTGTAGATATAGGTATTTAAGAATCCGC---  
TTT-----  
AACGACCAATGGTTAACGATGGCTCTGATGGGTGGTTTTGCTAGAATAGGGAATAATGAGATCACTATTTTAGTAAATGA  
TGCGGAGAAGAGTAGTGACATTGATCCCAAGAAGCCAGCAAACCTTTGAAATAGCAGAAGCTAATTTGAGGAAAGCTG  
AAAGCAAGAGACAAACAATTGAGGCAAATCTAGCTCTCAGACGAGCTAGGACACGAGTAGAGGTTATCAATGCGATTTCA  
-----ATGAAAAATGTAACCGATTCTTTCTGTTTCT---TTG---  
GTTAACTGGCCATTTCGCCGGGAGTTTTCGGGCTT---  
AATACCGATATTTTAGCAACAATCCAATAAATCTAAGTGTAGTGCTTGGTGTATTGATCTTTTTTTGGAAAGGGAGTG--  
-----  
TTAAGTGATTTATTAGATAATCGCAAACCTGAGGATTTTGAATAGTATTGCAAATTCAGAAGAAGTGCAGAGAGGGGCCAT  
TGAACGGCTGGAAAAAGCCCGGGCCCGTTACGAAAAATAGAAATAGAAGCAGATCAGTTTCGAGTGAATGGATACTCTG  
AGATAGAACGAGAAAAATTCAATTTGATTAATTCAACTTATAAGACTTTGGATCAATTAGAAAATTACAAAAATGAAACC  
ATTCATTTTGAACAACAAAGAGCAATTAATCAAGTCCGACAACGGGTTTTCCAACAAGCTTTACAAGGAGCGCTCGGAAC  
TCTGAATAGTTGTTG-----  
AACAAGGAGTTACATTTACGTACCATTAGTGCCAATATTGGCATGTTTGGAGCGATGAAA-----GAAATA---  
ACTGAT---  
ATGAATCCACTGATTTCTGCCGCTTCCGTTATTGCTGCTGGGTTGGCTGTTGGGCTTGTCTTATTGGACCTGGAGTTGG  
TCAAGGTACTGCTGCGGGCCAGGCAGTAGAAGGGATCGCGAGACAGCCCAGGCAGAGGGAAAAATACGAGGTACTTTAT  
TGCTTAGTCTGGCTTTTTATGGAAGCTTTAACAATTTATGGGCTGGTTGTAGCATTAGCACTTTTATTTGCGAATCCTTTT  
GTT---ATGAATGTTCTA-----TCATGTTCCATGAATACACTA---AGG---GGGTTA---  
TACGATATATCCGGTGTGGAAGTAGGCCAACATTTCTATTGGCAAATAGGTGGGTTCCAGGTCCATGCCCAAGTACTTAT  
TACTTCTTGGGTTGTAATTGCTATCTTATTAGGTTTCAGCCTTTATAGCCGTT---  
CGGAATCCACAAACCGTTCCGACTGCCACTCAAAATTTCTTCGAATATGTCCTTGAATTCATTTCGAGACGTGAGCAAAAC  
TCAGATTGGA---  
GAAGAATATGGCCCATGGGTTCCCTTTATTGGAACCTCTGTTTCTTTTTATTTTTGTTTCTAATTGGTCAGGTGCTCTTTT  
ACCTTGGAAAAATCATAGAGTTACCTCATGGGGAGTTAGCCGCACCCACGAATGATATAAATACTACCCTTGGCTTTAGCTT  
TGCTCACGTCAATAGCATACTTCTATGCGGGTCTTTCCAAAAAGGGATTAGGCTATTTTCAGTAAATACATTCAACCGACT  
CCAATTTCTTTTACCCATTAACATTTTGAAGATTTACAAAAACCTCTATCACTTAGTTTTTCGACTTTTTGGGAATATATT  
AGCCGATGAATTAGTAGTTGTTGTTCTTGTCTTTAGTACCTTTAGTGGTTTCTATACCCGTCATGTTCTTGGATTAT  
TTACAAGCGGTATTCAAGCTCTTATTTTTGCAACTTTAGCTGCGGCTTATATAGGCGAATCTATGGAGGGACATCAT---  
---  
ATGATATTTTCAACTTTGGAGCGTATATTAACGCATATATCCTTTTTCGGTGCTTTCAATTGGAATTACAATTTATTTAAT  
AACC-----TTCTTA---GTC-----  
GATGAAATCAGAGGGCTATATGCTTCATCAGAAAGGGGGATGACAGCTACCGCTTTCTGTCTAACAGGATTATTAATCAC  
CCGTTGGGTTTACTCGAGACATTTCCCATTAAGTGATTTATATGAATCATTAACTTTCTTTTCATGGAGTTTATCTATTA  
TCATAAGATTTTTGAT-----TTTTAA---AATAATCAAATCAT---



TTAAGCGCTATAACGGCACCAAGTGCTTTTTTTACCCAAGGCTTTGCGACTTCGGGTTTTTTAACCAAAATGCATCAATC  
CAGAATATTAGTACCCGCTCTCCAAGTCCAGTGGTTAATGATGCACGTAAGTATGATGGTATTGGGCTATGCAGCTCTTT  
TATGTGGATCATTATTATCCACGGCTCTTCTAGTCATTACATTTTCGAAAAGTG---ATAAGGCTTTTTTTG---  
AAAAGAAAAAATTTTGTACAT-----GTA---AATGGGTCATTTTGTTCAGTGAAATCCAATACATGAAC-----  
-GAAAAA-----AAGAATGTTTTT-----CTA-----AATAGT-----CTT-----  
--

TCCGCTAGAAATTATTACAGGTATCAAGTGATTCAACAATTGGATCGTTGGAGTTATCGTATTATTAGTTTAGGATTTAT  
CTTTTTAACCACAGGTATTCTTTTCGGGAGCAGTATGGGCTAATGAGGCGTGGGGTCTTATTGGAATTGGGATCCAAAAG  
AAACTTGGGCATTTATTACTTGGACGATATTCGGGATTTATTTACATACTCGAACA-----  
AATACAAAATGGGAAGGT-----  
GTAAATTCGCAATTGTGGCTTCTATGGGCTTTCTTATAATTTGGATATGCTATTTTCGGAGTCAATCTATTAGGAATAGG  
GTTACATAGTTATGGTTCATTT-----AAT-----  
-----ATG---ACAAAAAG-----  
-----AACGCATCCATTCCCCTTAGA-----

TATCTTTTCATCTATAGTATTTGTAGTATTTTTGCCCTGGTGGATCCCTCTCTCATTT-----A-  
TAAAAGTCTGGAATCCTGGGTTACTAATTGGTGGAAATACTAGTCAATCCGAAACCTTTTTGAATGATATTCAAGAAAAGG  
CTATTCTAGAAAAATTCATAGAATTAGAGGAATTATTTCTCTTG-----  
GACGAAATGATAAAGGAA---

TTTCCGGAAAGACGTCTAGAAAAGCTTCGTATAGGGCTCCAGAAAAGAAACAATCCAATTAATCAAGATGCACGATGAGGA  
TCATATCCATACGATTTTTCACTTTTCGACAAAATAACAATCTGCTTCGTTATTCTAAGTGGTTATTCTATTTTGTGTAATG  
AAGAACTTTTTATTCTTAACTCTTGGGTTCAAGAATTCCTATATAATTTAAGCGACACAATAAAAGCCTTTTCGATTCTT  
TTCGTAACTGATTTATGTATCGGATTCCATTACCCCGCGGTTGGGAACACTGATTGGCTATGTCTACAACGACTTTGG  
GCTTGCTCATAATGATAATGATATTATTCTATCTGTTCTTGTTCCTTTCCAGTCTGTTCTAGATACATTTTTTAAAT  
ATTGGCTTTTTTCTTATTTAAATCGTGTATCTCCGTCCTTGTAGTGATTTATCATTCAATGACTGAG-----  
ATGCCTATTGGTGTTCAAAAGTACCTTATCGAAGTCCC-----

-----GGGGACAAGCAT-----  
--CCATCTTGGGTTGACATA---AACCGACTTTATCGAGAAAGATTACTT---  
TTTTTAGGTCAAATGGTTGAGAGCGATATCTCGAATCAAC

Coffea

TGTTAATGAACAAGACGTACTTCTATTTATCGACAATATTTCCGTTTTCGTCCAAGCAGGATCCGAAGTCTCGGCCTTAT  
TGGGTAGAATGCCTTCCGCTGTGGGCTACCAACCCACCCTGAGTACCGAAATGGGTTCTTTACAAGAAAAGAATTACGTCT  
ACCAAAGAGGGATCTATAAATTCTATTCAAGCAGTTTATGTACCTGCAGACGATTTAACCGACCCCGCCCTGCTACGAC  
ATTTGCACATTTAGATGCCACTACCGTACTATCAAGAGGATTAGCTGCCAAAGGTATCTATCCCGCAGTAGATCCTTTAG  
ATTCAACATCAACCATGCTTCAACCTCGGATTGTTGGTGAGGAACATTATGAAACTGCGCAAAGGGTTAAGCAAACCTTTA  
CAACGTTATAAAGAACTCCAGGATATTATAGCTATCCTCGGGTTAGATGAATTATCCGAAGAGGATCGTTTAAACCGTAGC  
ACGAGCACGAAAAATGAGCGTTTCTTATCACAACCCTTTTTCGTAGCAGAAGTATTTACCGGTTCTCCAGGAAAATATG  
TTGGTCTAGCAGAAAACAATTAGAGGATTTCAATTGATCCTTTCCGGAGAATTAGATAGTCTTCTGAACAGGCTTTTTTAT  
TTGGTAGGTAATATCGATGAAGCTACCGCGAAGGCTATGAACCTTAGAA-----ATGGAG---AACAATTTGAAGAAA--  
-

ATGACCTTAAATCTTTGTGTAATAACGCCTAATCGAATTGTTTGGGATTGAGAAGTAAAAGAAATAATTTTACCTACTAA  
TAGTGGTCAAATGGCGTATTACCCAACCATGCCCTATTGCCACAGCTGTAGATATAGGTATTTTGAGAATACGC---  
CTT-----

AATGGCCAATGGTTAACGATGGCTCTTATGGGTGGTTTTGCTAAAATAGGCAGTAATGAAATCATTGTTTTAGTAAATGA  
TGCGGAGAAGGGTAGTGACATTGATCCACAAGAAGCTCAGCAAACCTTTGAAATAGCGGAAGCTAATTTGAAAAAGCTG  
AAGGAAAAGAGACAAACAATTGAAGCAAATCTAGCTCTCCGGCGAGCTAGGACACGGGTAGAGGCTATCAATGCGGTT---  
-----ATGAAAAATGTAACCGATTCTTTCTTTCT---TTG---

GGCCACTGGCCATTTGCCGGGAGTTTCGGGTTTTTTAATACCGATATTTTATCAACAATCTAATAAATCTAAGTGTAGT  
GCTTGGTGTATTGATCTTCTTTGAAAGGGAGTG-----

TTAAGTGATTTATTAGATAATCGAAAACAGAGGATCTTGAATACTATTTCGAAATTCAGAAGAACTTCGTGGAGGGCCAT  
TGAACAGTTGGAAAAGCCCGGACCCGCTTACGGAAGTGGAAATGGAAGCAGATCAATTTTCGAGTGAATGGATACTCTG  
AGATAGAGCGAGAAAAGTTGAATTTAATTAATTCAATTTATAAGACTTTGGAACAATTAGAAAATTATAAGAATGAAACT  
ATTCAGTTTGAACAGCAAAGGACGATTAATCAAGTTCGACAACGGGTTTTTCAACAAGCCTTACAGGGAGCTTTAGGAAC  
TCTGAATAGCTGTTTG-----

AACAACGAGTTACATTTACGTACGATTAGTGCCAATATTGGCATCTTAGGGTCGATAAAA-----GAAAAA---  
ACTGAT---

ATGAATCCACTGATTTCTGCCGCTTCCGTTATTGCTGCTGGATTGGCTGTAGGGCTTGTCTTATTGGACCCGGAGTTGG  
TCAAGGAACTGCTGCGGGTCAAGCCGTAGAGGATTCGCGAGACAGCCCGAGGCAGAGGGAAAAATACGAGGTACTCTAT

TGCTCAGTCTAGCTTTTTATGGAAGCTTTAACAATTTATGGACTGGTTGTAGCATTAGCACTTTTGTTCGGAATCCTTTT  
GTT---ATGAATGTTCTA-----GCA-----AACACACTA---AAA---GGGTTA---  
TACGATGTATCCGGTGTGGAAGTAGGCCAACATTTCTATTGGCAAATAGGGGGTTTCCAAGTCCACGGCCAAGTACTTAT  
TACTTCTTGGGTTGTAATTGCTATCTTATTAGGTTTCGGCTGCTATAGCTGTT---  
CGGGACCCACAAACCATTCCAACCTGGGGGTGAGAATTTCTTCGAATATGTTCTTGAATTTATTTCGAGATGTCAGTAAAC  
CCAAATTGGA---  
GAAGAATATGGTCCTTGGGTTCCCTTTTATTGGAACCTCTGTTTCTATTTATTTTGTTCCTAATTGGTCAGGAGCCCTTTT  
ACCTTGGAAAATCATAACAATTACCTCACGGGGAGTTAGCTGCACCCACGAATGATATAAATACGACTGTTGCTTTGGCTT  
TACTGACGTGAGTGGCATAATTTCTATGCGGGTATTACCAAAAAGGGATTAAGTTATTTTCGGGAAATATATTCAACCAACC  
CCAATCCTTTTACCCATTAATATCTTAGAAGATTTACAAAACCTTTATCGCTTAGTTTTCGACTTTTCGGAAATATCTT  
AGCTGATGAATTGGTTGTTGTTGTTCTTGTTCCTTTAGTACCTTTAGTGGTTTCTATACCTGTCATGTTCCCTTGGATTAT  
TTACAAGTGGTATTCAAGCTCTTATTTTGAACCTTTAGCCGCGGCTTATATAGGTGAATCCATGGAGGGCCATCAT---  
---  
ATGATATTTTCAACCGTAGAACATATATTAACCTCATATTTCCCTTTTCCATCGTTTCAATCATAATTACAATGCGTTTGAT  
AAGC---TTTTTTTTA---GTA-----  
GATGGGATCGTACAACCTATATGATTCGTCTGAAAAGGGCATGATAGTTACTTTTTTATGTCTAACAGGATTATTAGTTAC  
GCGTTGGACTTATTCGGGACATTTCCCACTAAGCAATTTATATGAATCATTAACTTCCCTTTTCGTGGAGTTTTTCCCTTA  
TTCATATAGTTCCGTAT-----TTCAA---AAAAATAAAAAGTAT---  
TTAAGCACAATAACCGGTTCAAGTGTGTTTTACTCAAGGCTTTACTACTTCAGGTCTTTTAACTGAAATAGACCAATC  
TTCAATATTAGTGCCTGCTCTTCAATCCGAATGGTTAATAATGCACGTAACAATGATGATATTGGGCTATGCGTCCCTTT  
TATGTGGATCATTATTGTCAATAGCACTTCTAGTCAATTACATTTAGAAAAAC---AAAAAGATTCTTTAT-----  
AGAAATAATCTTTTA-----TTA---AATGAGTCATTTTTCTTTGTTGAAATCGAATATATGAAT-----  
GAAAGA-----AGTAATCTTTTG-----CAA-----AATACTTCT-----TTTTT-----  
-  
TCTGCTAAGAATTATTATAGGTCTCAATTGATTCAACAATTGGATTATTGGAGTTCCCGGGGCATCAGTCTGGGGTTTAT  
ATTTTTAACCATAGGTATTCTGTGAGGAGCAGTATGGGCTAACGAAGCGTGGGGATCGTATTGGAATTGGGATCCAAAGG  
AAACTTGGGCATTTATTACTTGGATCATATTCGCGATTTATTTACATACTCGAACA-----  
ACTAGAAAACCCGAAATGT-----  
GCAAACCTCAGCAATTGTAGCGTCTATAGGCTTTCTTATAATTTGGATTTGCTATTTTGGGGTCAATCTATTAGGAATAGG  
GCTGCATAGTTATGGTTCATTTACATTACTAGCTAAC-----  
-----ATG---ACAAAAAAG-----  
-----AAAGCATTCACTCCCCTTTTA-----TATCTTGTATCTATAGTATTT-----  
TTGCCCTGGTGGCTTTCTCTCTCATT-----  
AATAAAAGTCTGGAATCTTGGGTTAATAATTGGTGGAAATGCTGGGCAATCCGAAATTTTTTTGAATGATATTCAAGAAAA  
GAGTATTCTAGAAAAATTCATAGAATTAGAGGAACCTCCTCGTCTTA-----  
GACGAACCTGATCGAGGAA---  
TACTCGGAGACACATCTACAAAATTTTCGTATAGGAATCCAAAAGAAGCGATCCAATTAATCAACATATACAACGAGGG  
TCGGATCCATACGATTTTGCATTTCTCGACAAATATAATCTGTTTTGTTATTCTAAGCGTTTTTCTATTTTGGGTAATG  
AAGAACTTGTATTCTTAACTCTTGGACCCAGAAATTCCTATATAACTTAAGCGACACAGTCAAAGCTTTTTCTATTCTT  
TTATTAACGGATTTATGTATCGGATTCCATTACCTCATGGTTGGGAACATAATGGTTGGCTCTGTCTACAAAGATCTTGG  
ATTTGTTTATAATGATCAA-----  
ATTATATCTGGTCTTGTTCCTACTTTTCCAGTCACTTCTTGATACAATTTTTAAATATTGGATTTTCCGTTATTTAAATCG  
TGTATCTCCTTCACTTGTAGTTATTTATCATTCAATGAATGAC-----  
ATGCCTATTGGTGTTCAAAAGTACCTTTCCGAAGTCT-----  
-----GGAGAGGAAGAT-----  
--GCATCTTGGGTTGACGTATAACAACCGACTTTATCGAGAAAGATTACTT---  
TTTTTAGGTCAAGCAGTTGATAGCGAGATCTCAAATCAAC

Cucumis

TGTTAATGAACAAGACGTACTTCTATTTATCGACAATATCTTCCGTTTCGTCCAAGCAGGATCTGAGGTATCCGCCTTAT  
TGGGTAGAATGCCTTCTGCTGTGGGTTATCAACCTACCCTTAGTACCGAAATGGGTACTTTACAAGAAAGAATTACTTCT  
ACCAAAGAGGGATCCATAAATTCTATTCAAGCAGTTTATGTACCTGCGGACGATTTAACCGACCCTGCTCCTGCCACGAC  
ATTTGCACATTTAGATGCTACGACCGTACTATCAAGAGGATTAGCTGCTAAAGGTATCTATCCAGCAGTAGATCCTTTAG  
ATTCACGTCAACTATGCTCCAACCTCGAATCGTTGGTGAGGAACATTATGAAACTGCACAAAGAGTTAAGCAAACCTTTA  
CAACGTTACAAAGAACTTCAGGACATTATAGCTATCCTTGGGTTGGACGAATTATCTGAAGAGGATCGCTTAAACCGTAGC  
AAGAGCACGAAAAATTGAGCGTTTCTTATCCCAACCTTTTTTCGTAGCAGAAGTATTTACCGGTTCCCGGGGAAATATG  
TTGGTCTAGCAGAAACAATTAGAGGGTTTTAAATTGATCCTTTCCGGAGAATTAGATGGTCTTCTTGAACAAGCCTTTTAT  
TTGGTAGGTAACATCGATGAAGCTACTGCGAAGGCTACGAACCTTAGAA-----ATGGAG---AGTAAATTGAAGAAA--

-  
ATGACCTTAAATCTTTGTGTACTAACCCTAATCGAATTGTTTGGGATTGAGAAGTGAAAGAAATCATTTTATCTACTAA  
TACTGGACAAATTGGCGTATTACCAAATCACGCGCCTATTGCCACAGCTGTAGATATAGGTATTTTGAGAATACGC---  
CTT-----  
AACGACCAATGGTTAACAATGGCTCTGATGGGTGGTTTTGCTAGAATAGGCAATAATGAGATCACTATTTTAGTAAATGA  
CGCGGAAAAGGGTAGTGATATTGATCCACAAGAAGCTCAGGAACTCTTGAAGTAGCGGAAGCTAACTTAAGAAAAGCTG  
AAGGTAAGAGACAAACAATTGAGGCAAATCTAGCTCTCAGACGAGCTAGGACACGAGTCGAGGCTATCAATGCAATTTCA  
-----ATGAAAAATGTAACCGATTCTTTCATTTCT---TTG---  
GGTTATTGGCCATCCGCCGAGAGTTTCGGATTT---  
AATACCGATATTTTAGCAACAAATCCAATAAATCTAAGCGTAGTGCTTGGTGTATTGATTTTTTTTGGAAAGGGAGTG--  
-----  
TTAAGTGATTTATTAGATAATCGAAAACAGAGGATCTTGAAAACAATTCAAAATTCAGAAGAAGCTCCGTGGGGGGGCCAT  
TGAACAGCTGGAAAAAGCCCGGGCTCGCTTACGAAAAGTCGAAATGGAGGCGGATCAGTTTTCGAGTGAATGGATATTCTG  
AGATAGAACGAGAAAAATTGAATTTGATTAATTCAACTTCTAAAAGTTTTGGAACAATTAGAAAATTATAAAAATGAAACT  
ATTCGTTTTGAACAACAAAAGCGATTAATCAAGTACGACAACAGTTTTTCCAACAAGCCTTACAAGGAGCTCTAGGAAC  
TCTGAATAGTTGTTG-----  
GACAACGAGTTACATTTACGTACCATCAGTGCTAATATTGGCATGTTTGGGACGATGAAA-----GAAATA---  
ACTAAC---  
ATGAATCCACTGATTTCTGCCGCTTCCGTTATTGCTGCTGGGTTAGCTGTGCGGCTTGCTTCTATTGGACCTGGAGTTGG  
TCAAGGTACTGCTGCGGGCCAAGCTGTAGAAGGTATTGCAAGACAGCCCAGGCGGAGGGAAAAATACGAGGTACTTTAT  
TGCTTAGTCTGGCTTTTTATGGAAGCGTTAACAATTTATGGATTGGTTGTAGCCTTAGCGCTTTTATTTGCGAATCCCTTT  
GTG---ATGAATGTTTTA-----TCATGTTCCACCAACACACTA---AAA---GGGTTA---  
TACGATATATCGGGTGTGGAAGTAGGCCAACATTTCTATTGGCAAATAGGAGGTTTTCAAGTCCATGGCCAAGTCCTTAT  
TACTTCTTGGGTTGTAATTGCTATCTTATTAGGTTCCGCCAGTATAGCTGTT---  
CGGAATCCACAAACCATTCCGAATGACAGTCAAAATTTCTTCGAATATGTCCTTGAATTCATTGAGACGTTAGCAAAAC  
TCAGATTGGA---  
GAAGAATATGGTCCATGGGTTCCTTTTATTGGAACATGTTCCATTTATTTTTGTTTCGAATTGGTCAGGGGCTCTTTT  
ACCATGGAAAATCATAGAATTACCTCATGGGGAGTTAGCCGCACCCACGAATGATATAAATACTACCGTTGCTTTAGCTT  
TACTCACGTCAGTAGCATATTTCTATGCAGGTCTTACCAAAAAAGGATTAAGTTATTTTCAGTAAATACATTCAACCAACT  
CCAATCCTTTTACCATTAAACATCTTAGAAGATTTACAAAACCTTTATCACTTAGTTTTCGACTTTTCGAAATATATT  
AGCCGATGAATTAGTAGTTGTTGTTCTTGTTCCTTTAGTACCTTTAGTGGTTCCATACCTGTGTCATGTTCCCTTGGATTAT  
TTACAAGTGGTATTCAAGCTCTTATTTTTGCAACTTTAGCCGCGGCTTATATAGGTGAATCCATGGAGGGTCATCAT---  
---  
ATGATATTTTCCACCTTAGAACATATATTAACCTCATATATCCTTTTTCGATCATTTC AATAGTAATTACTATTTTTTTGAT  
AAGC-----TTATCG---GTC-----  
GATGAAATCGTAGGACTATATGATTCGTCAGAAAAGGCATGACAGCTACTTTTTTCTGTATAACAGGCTTATTAGTCAC  
TCGTTGGATTTATTCGGGACATTTCCCGTTAAGTGATTTATATGAATCATTATTTTTCTTTCATGGAGTTTCTCCGTTA  
TTCATATGGTTCCGTAT-----TTTTAA---AAACATAAAAATTAT---  
TTAAGCACAATAACCGCGCCAAGTACTATTTTTACCCAAGGCTTTGCTACTTCCGGTCTTTTAACTGAAATGCATCAATC  
CGAAATAGTAGTACCTGCTCTCCAATCCCAATGGTTAATGATGCATGTAAGTATGATGATATTGGGCTACGCAGCTCTTT  
TATGTGGATCATTATTATCAGTAGCTCTCTTAGTCATTACATTGCGAAAAGCC---ATAAGGGTTTTTAGT-----  
AAAAAAAACAATTTT-----TTA---AATGAGTCATTTTCTTTGTGCGAGATCCAATACATGAAT-----  
GAAAGA-----AGCAATGTTTTA-----CTA-----ACCATTCT-----TTTTGT-----  
-  
TCTTCTCGAAATATTACAGGGCTCAACTGATTCAACAAGTACTAGATCAGTGGAGTTATCGTATTATTAGTCTAGGGTTTCT  
CTTTTTAACCATAGGTATTCTTTTCGGGAGCAGTATGGGCTAATGAGGCATGGGGTTCATATTGGAATTGGGACCCAAAGG  
AAACTTGGGCATTTATTACTTGGACCCTATTTGCGATTTATTTACATACTCGAACA-----  
AATAAAAATTGGGAAAGT-----  
TTTTAATTGCGCAATTGTGGCTTCTATAGGCTTTCTTATAATTTGGATATGCTATTTTGGGGTTAATTTATTAGGAATAGG  
ATTACATAGTTATGGTTCATTT-----AATTTACAT-----  
-----ATG---GTAAAAAG-----  
-----AAAGCATTCTTCTCTCTTA-----TATCTTACATCTATAGTATTT-----  
TTGCCCTGGTGGATCTCTCTCATT-----  
AATAAAAGTCTTGAATTTTGGATTACTAATTTGGTGGAAATACTAGGCAATCCGAAACTTTTTTGGACTGATATTCAAGAAAA  
GAGTATTCTAGAAAAATTCATCGAATTGGAAGAAGTCTTACTCTTG-----  
GACGAAATGATAAAAGAA---  
TACCCGAAACACATCTACAAACACTTCGTATAGGAATCCACAAAGAAACGATCCAATTGATCAAGATGCACAATGAGGA

TCATATCCATATGATTTTGCACCTTATCGACAAATATAACCTCTTTTCATTATTTTAAGTGGTTATTCTATTCTGGGTAATG  
AAGAACTTGCTATTCTTAACTCTTGGGTTCAAGAATTCCTATATAACTTAAAGTACACAATAAAAGCTTTTTCTATTCTT  
TTATTAAGTATTGATATCGGATTCCATTGCCCCATGGTTGGGAATAATGATTGGCTATGTCTACAAAGATTTTGG  
ATTTGCTCACAACGATCAA-----

ATTATATCGGGTCTTGTCTACTTTTTCCAGTCATTCTGGATACAATTTTTAAATATTGGATCTTCCGCTATTTAAATCG  
TATATCTCCATCACTTGTAGTGATTTATCATTCAATGAATGAC-----

ATGCCTATTGGTGTTCAAAAGTACCCTTTTGAAGTCCT-----GGAGAGGAAGAT-----

--GCCTCTTGGGTTGACGTATAGAACCGACTTTATCGAGAAAGATTACTT---

TTTTTAGGCCAAGAGGTTGATAGCGAGATTTTCAATCAAC

Daucus

TGTTAATGAACAAGATGTACTTCTATTTATCGACAATATCTTCCGTTTTCGTCCAAGCAGGATCGGAAGTATCCGCCTTAT  
TGGGTAGAATGCCTTCCGCTGTGGGTTATCAACCCACCCTTAGTACCGAAATGGGTACGTTACAAGAAAGAATTACTTCCG  
ACGAAAGAGGGGTCCATAACCTCTATTCAAGCAGTTTATGTACCTGCAGACGATTTGACCGACCCTGCGCCCGCTACGAC  
ATTTGCACATTTGGATGCTACTACTGTACTATCAAGAGGATTAGCCGCCAAAGGTATCTATCCAGCAGTAGATCCTTTAG  
ATTTCAACGTCAACTATGCTCCAACCCCGGATTGTTGGTGAGGACCATTATGAAACTGCCCAAAAAGTTAAGCAAACCTTTA  
CAACGTTACAAGAAGACTTCAAGGACATTATAGCTATCCTTGGATTGGACGAATTATCCGAAGAGGATCGCTTAACCGTAGC  
AAGAGCGCGAAAAATTGAGCGTTTCTTATCACAACCCTTTTTTCGTAGCAGAAGTTTTTACCAGTTCTCCAGGAAAAATATG  
TTGGTTTTATCAGAAAATAGAGGGTTTTCGGTTGATCCTTTCCGGAGAATTAGACAGTCTTCTGAACAGGCCTTTTTAT  
TTGGTAGGTAACATCGATGAAGCTACCGCGAAGGCTATGAACCTAGAA-----ATGGAG---AGCAATTCGAAT-----

ATGACCTTAAATCTTTGTGACTAACCCTAATCGAACTGTTTGGAAATCAAAAGTGAACGAAATCATTATCTACTAA  
TAGTGGTCAAATGGTGTATTACCAAATCACGCCTCTGTTGCTACAGCCGTCGATATAGGTATTTGAAAATACGT---  
CTT-----

GACGGCCAATGGTTAACGATGGCCCTGATGGGAGGTTTTGCTATAATAGGTAATAATGAGATCACTGTTTTAGTAAATGA  
TGCGGAAAAAGGTAGTGACATCGATTACAAAGAAGCCAGCAAACCTTTGAAATAGCAGAAGCTAATTTAGAAAAGCTG  
AAGGAAAGAGACAAAAAATTGAGGCAAATCTAGCTCTCCGACGAGCTAGGACACGAGTCGAGACGATCAATGCGATTTCCG  
-----ATGAAAAATGTAACCGATTCTTTTCGTTTTCT---TTG---

GGCCACTGGCCGTCGCCCGGGAGTTTTCGGGTTTT---

AATACCGATATTTTAGCAACAAATCTAATAAATCTAAGTGTAGTGCTTGGGGTATTGGTTTTTTTTTGGAAAGGGAGTG--  
-----

TTAAGTGATTTATTAGATAATCGAAAACAGAGGATCTTGAATACTATTTCGAAATTCAGAAGAAGTGCCTGGGGGAGCCAT  
TGAACAGCTGGAAAAGGCCCGTACTCGCTTACGAAAAGTGGAAATGGAGGCAGATCAGTTTTCGAGTCAATGGATACTCTG  
AGATAGAGCGAGAAAGATTGAATTTTATTAATTCACCTTCTAAGACTTTGAAACAAGTAAAGAAATACAAAAACGAAACT  
ATTAATTTTGAACAACAAAGAGCGATTAATCAAGTCCGACAAGTGGTTTTTCCAACAAGCCTTACAAGGGGCTCTAGGAAC  
TCTGAGTAGTTGTTTTG-----AACACGAGTTACATTTACGTACGATACGTGCCAATATTGGCATGTTGGGGGCA----  
-----ATA---ACCGAT---

ATGAATCCACTGATTTCTGCCGCTTCCGTTATTGCTGCTGGATTGGCTGTAGGGCTTGTCTTCTATTGGACCTGGAGTTGG  
TCAAGGTACTGCTGCGGGCCAAGCTGTAGAAGGTATCGCGAGACAGCCCAGGGCGGAGGGAAAAATACGAGGTACTTTAT  
TGCTTAGTCTAGCTTTTTATGGAAGCTTTAACAATTTATGGTCTGGTTGTAGCATTAGCACTTTTATTTGCGAATCCTTTT  
GTT---ATGAATGTTCTA-----TCCTGTTCCATCAACAAACTA---AAT---GGGTTA---

TACGATATTTCTGGTGTGGAAGTAGGCCAACATTTCTATTGGAAAATAGGAGGTTTCCAAGTCCACGGCCAAGTACTTAT  
TACTTCTTGGGTTGTAATTGCTATCTTATTGGGTTTCAGCTACTCTAGCTGTT---  
CGGAACCCACAAACCATTCCAAGTACGGTTCAGAAATTTCTTCAATATGTACTTGAATTCATTTCGAGATGTGAGTAAAC  
TCAAATTGGA---

GAAGAATATGGTCCCTGGGTTCCTTTTATTGGAACAATGTTTCTATTTATTTTTGTTTCTAATTGGTCAGGAGCGCTTTT  
ACCTTGGAAAATCATACAATTACCTCATGGGGAGTTAGCCGCACCCACGAATGATATAAATACTACTGTTGCTTTGGCTT  
TACTCACGTCAGTGGCATAATTTCTATGCGGGTATTAGCAAAAAGGATTGGGTTATTTTCGAAAATATATTCAACCAACC  
CCAATCCTTTTACCATTAAACATCTTAGAAGATTTACAAAACCTTTTACTCAGTTTTTCGACTTTTTCGAAAATATATT  
AGCTGATGAATTAGTAGTTGTTGTTCTTGTCTTTAGTACCTTTAGTGGTTTCTATACCTGTCATGTTCTTGGATTAT  
TTACAAGTGGTATTCAAGCTCTGATTTTTGCAACTTTAGCCGCGGCTTATATAGGGGAATCCATGGAGGGTCATCAT---  
---

ATGATATTTTCAACTTTAGAGCATATATTAACCTCATATTTTCCCTTTTCCATCGTTTTGCATTGTAATTACATTTTCAATTTGAT  
AACT-----TTATTA---ATC-----

GATGAAATCATAAACTAAACAATTCGTCAGAAAAGGGAATGATAGCTACTTTTTTATGTATAACCGTATTATTAGTCAC  
TCGTTGTATTTATTTCTGGGCATTTACCCTAAGTGATTTATATGAATCATTAACTTTTCTTTTCATGGAGTTTATCATTAA  
TTCATATAGTTCCATAT-----TTCAA---AAAAATAAAAGCCAT---

TTAAGCACAATAACTGCGTCAAGTGTATTTTTACCCAAGGCTTTGCTACTTCGGGTCTTTAACTGAAATACATCAATC  
CGCAATATTAGTACCCGCTCTCCAATCCGAGTGGTTAATAATGCACGTAAGTATGATGATATTGGGCTATGCAGCTCTTT  
TATGTGGATCATTATTATCAGTAGCACTTCTGGTCCTTACATTTGAAAAAAC---AGAAATCTTCTTTGT-----  
AAGAAGAACCCCTTTTATTAAAATTA---ACCGAGGAATTTTCTTTGGTGAAATACAATACATAAAT-----  
GAAATA-----AATAATATTTTT-----GGA-----AATGCTTCT-----TTTTT-----  
-

TCTGATAACAATTATTACAGGTCCCAATTGATTCAACAGTTGGATTATTGGAGTTATCGTGTGATTAGTCTAGGTTTTAT  
CTTTTTAACTATAGGTATTCTTTTCAGGAGCAGTATGGGCTAATGAAGCATGGGGTTCATATTGGAATTGGGACCCAAAGG  
AACTTGGGCATTTATTACTTGGATCGTATTTGCGGTTTTATTACATACTAGAACC-----  
AATACAAATTTACAGGTT-----

GAAAATTCGCAATTGTGGCATCTATGGGCTTTCTTATAATTTGGATATGCTATTTTGGGGTCAATCTATTAGGAATAGG  
GCTACATACTTATGGTTCATTTACGTTAACATCTAAT-----ATG---TCAAAAAAG-----

-----AAAGCATTACCTCTCTTTTA-----TATCTTGCATCTATAGTATTT-----  
TTGCCCTGGTGGATTTCTCTCTCATT-----

AATAAAAGTCTGGAATCTTGGGTTACTGATTGGTGGAAATACTAGGCAATCTGAAATTTTTTGGAAATGATATTCAAGAAAA  
GAATATTATAAAAAATTTTCATAGAATTGGAAGAAATCCTTCTTTTG-----  
GAGGAAATGATCAAGGAA---

GACTCAGAGACACATCTACAAAACCTTCGTATAGGAATCCACAAAGAAACGCTCCAATTAATCAAGATACACAATGAGGA  
TCATATTCATACGATTTTGCATTTCTCGACAAATATAATCTGTTTCGTTATTCTAAGCGGTTATTCTATTTTGGGTAATG  
AAGAAGTTGTTATTCTTAACTCTTGGGCTCAGGAATTCATATATAACTTAAAGTACACAATAAAAGCTTTTTGGATTCTT  
TTATTAACAGATTTTTTATCGGATTCCATTCGACTCGTGGTTGGGAATAATGATTGGCTTTGTCTACAAAGATTTTGG  
ATTTGCTCATAATGATCAA-----

ATTCTATCTAGTCTTGTGTTGATTTTTCCAGTCACTCTAGATACTCTATTTAAATTTTGGGTTTTTTCGTTATTTAAATTG  
TGTTTTCTCCGTCACCTGTAGTGATTTATCATTCAATGAATGAA-----  
ATGCCTATTGGTGTTCACAAAAGTGCCTTTTAGAAGTCT-----GGAGAGGAAGAT-----

--GCATCCTGGGTTGACGTATAACAACCGACTTTATCGAGAAAGATTACTT---  
TTTTTAGGACAAGAGGTTGATAGCGAGATCTCGAACCAAC

Dioscorea

TGTTAATGAACAAGACGTGCTTCTATTCAATTGACAATATTTTTCGTTTTCGTCCAAGCAGGATCAGAAGTATCCGCCTTAT  
TGGGGAGAATGCCTTCTGCAGTGGGTTATCAACCCACCCTTAGTACAGAAATGGGTTCTTTGCAAGAAAGAATTACTTCT  
ACCAAAGAGGGATCTATAACTTCGATCCAAGCAGTTTATGTACCTGCGGACGATTTGACCGACCCTGCTCCTGCCACGAC  
ATTTGCACATTTAGATGCTACTACCGTACTATCAAGAGGATTAGCTGCCAAAGGTATTTATCCAGCGGTAGATCCTTTAG  
ATTCACGTCAACTATGTTACAGCCTGGCATCGTTGGCGAGGAACATTATGAAACTGCGCAAAAAGTTAAGCAAACCTTCA  
CAACGTTACAAAGAACTTCAGGACATTATAGCTATCCTTGGGTTGGACGAATTATCCGAAGAAGATCGTTTAACTGTAGC  
AAGAGCACGAAAAATTGAGCGCTTCTTATCACAACCCTTCTTCGTGGCAGAAGTATTTACGGGTTCTCCAGGGAAATATG  
TTGGTCTCGCAGAAACAATTAGGGGGTTTTCAACTCATTCTTTCCGGAGAATTAGATAGCCTTCCCGAACAGGCCTTTTAT  
TTGGTGGGTAACATCGATGAAGCTACCGCGAAAGCTATGAACCTAGAA-----GTGGAG---AACAAATTGAAGAAA--  
-

ATGACCTTAAATCTTTGTGTAAGTACTGACTCCTAATCGAATTATTTGGGATTCAGAAGTGAAGAAATAATTTTTATCTACTAA  
TAGTGGCCAAATTGGCGTATTACCAAACCACGCACCTATTGCCACGGCCGTAGATATAGGTCTTTTGGAGAATACGC---  
CTC-----

AATGATCAATGGTTAACGGTGGCTCTGATGGGCGGTTTTCGCTAGAATAGGTAATAATGAGATCACCATTTTAGGAAATGA  
TGCGGAGATGAATACTGATATTGATCCGCAAGAAGCTCAACAACTCTTGAAATAGCTGAAGCTAACTTGAGTAGAGCTG  
AGGGTAAAAGACAAGTAATTGAAGCCAATCTAGCTCTCAGACGAGCTAGGACACGAATAGAGGCTATCAATGTTATCTCC  
TCC-----ATGAAAAATGTAACCGATTCTTTTGTTTAC---

TTGGTAGGGCACTGTCCATTGCGCGGAAGTTTCGCATTT---  
AATACCGATATTTTAGCAACAAATCCAATAAATCTGAGTATAGTGCTTGGTGTATTGATTTTTTTTTGGAAAGGGAGTG--  
-----

TTAAATGATTTATTAGATAATCGAAAACAGAGGATCTTGAGTACTATTCAAAATTCGGAAGAATTGCGTAAAAAGACCAT  
TGAGCAACTCGAAAGAGCCCGAGATCGCTTACGCAAAGTGGAAATAGAAGCAGATGAGTATCGAATTAATGGATACTCTG  
AGATAGAACGAGAAAAACAAATTTGATTAATGCTACTTATGATAGTTTGGAAACGATTAGAAAATTACAAAAATGAAACC  
CTTCATTTTGAACAACAAAGAGCGATTAATAAAGTACGACAACGAGTTTTTTCAGGAAGCCTTACAAGGAGCTCTAGGAAC  
TCTGAATAGTTGTTTTG-----

AATAGTGATTTACATTTCCGTACAATCAGTGCTAATATTGGCATCCTCGGAGCCATGGAA-----GAAATA---  
ACCGAT---

ATGAATCCACTGATTTCTGCTGCTTCCGTTATTGCTGCTGGATTGGCTGTAGGGCTTGCTTCTATTGGACCTGGAGTTGG  
TCAAGGTACTGCTGCAGGTCAAGCCGTAGAAGGTATTGCGAGGCAACCAGAAGCAGAGGGTAAAATACGAGGTACTTTAT  
TGCTTAGTCTAGCTTTTATGGAAGCTTTAACAATTTACGGGCTGGTTCGTGGCATTGGCGCTTTTATTTGCGAATCCTTTT  
GTT---ATGAATGTTATA-----CCATGTTCCATTAAAACACTC---AAA---GGATTA---  
TATGATATATCGGGTGTAGAAGTAGGCCAACATTTATATTGGCAAATAGGGGCTTTACAAATCCATGCCCAAGTACTTAT  
CACTTCTTGGGTGCTAATTGCTATCTTATTAGGTTTCAGTCATCATAGCTGTT---  
CGGAATCCACAAACCATTCCGAGCGGGGGTCCAGAATTTCTTCGAATATGTCCTTGAATTTATTTCGAGATTTGAGCAAAGC  
CCAAATTGGA---  
GAAGAATATGGTTCCTTGGGTTCCCTTTATTGGAACATGTTCCATTTATTTTTGTTTCTAACTGGTCAGGTGCTCTTTT  
ACCTTGGAAAATCATACTAGTTACCTCACGGGGAGTTAGCTGCGCCACGAATGATATAAAATACTACTGTTGCTTTAGCTT  
TACCCACGTCAGTACATATTTTTATGCAAGTCTTACCAAAAAGGATTTGGGTTATTTTCAGAAAATACATTCAACCAACT  
CCAATTTCTTTTACCAATAAATATCCTAGAAGATTTACAAAACCTTTATCTCTTAGTTTTTCGACTTTTCGGGAATATATT  
GGCTGATGAATTAGTAGTTGTTGTTCTTGGTTCTTTAGTACCTTCATTAGTTCCCTATACCCGTTATGTTTCTTGGCTTAT  
TTACAAGTGGTATTCAAGCTCTTATTTTTGCAACTTTAGCCGCGGCTTATATAGGCGAATCCATGGAAGGTCATCAT---  
---  
ATGATATTTGTGACTTTAGAACATATATTAACCTCATATCTCTTTTTTCGATCATTTC AATTGTGATTACGATTCATTTGAT  
GACT-----TTATTA---ATC-----  
CACAAAATTGCAGGATTATGTGATTCGTCGGAAAAAGGGATAATATCCACTTTTTTCTCTATAACAGGATTATTAATTAC  
TCGGTGGATTTATTCGGGGCATTTCCTGTTAAGTAATTTATACGAATCATTAACTCTTCTTTTCGTGGAGTTTCTCCATTA  
TTCATATGATTCCTAT-----CTTAGG---AATCATAAAAATGAT---  
TTAAGCGTAATAACTGTACCAAGTGTATTTTTACTCAAGGCTTCGTACGTCGTGCTTTCAACTGAAATGCGGCAATC  
TGCAATATTAGTACCTGCTCTAAAATCTCAATGGTTAATAATGCACGTAAGTATGATGTTATTGAGCTACGCAACTCTTT  
TATGCGGATCATTATTATCAGTCGCTCTTTTAGTTATTACATTTTGAAAAAAC---ATGGATATTTTTTGT-----  
AAAAGGAAAAATTTT-----TTA---ATTAAGTCATTTTTCTTTGCTGAGACCGAATATTTGAAT-----  
AAAAAA-----AGAAGTGTTTTT-----AAA-----AACACCTCT-----TTTCTT-----  
-  
TCATTTGCAAATTATTACAAATATCAATTGACTCAGCGTTTTGGATTATTGGACTTATCGTATCATTAGTTTAGGGTTCAT  
TTTTTTAACCATGGGCATACTTTTCGGGAGCAGTATGGGCTAATGAGGCATGGGGATCCTATTGGAATTGGGACCCCAAAG  
AAACTTGGGCATTTATTACTTGGACCATATTCGCGATTTATTTCGCATATTAGAATA-----  
AATATAAATTTTTCAAGGT-----  
ACCAATCCAGCACTTGTAGCTTCTATAGGATTTCTTATAATTTGGATATGCTATTTTGGGATCAATCTTTTAGGAATAGG  
TCTACATAGTTATGGTTCATTACATTACCATCTAAT-----  
-----ATG---AAAAAAAAG-----  
-----AAAGCATTGATTTCCATACCA-----TATCTTGTATCTATAGTATTT-----  
TTGCCCTGGTGGGTCTCTCTCTCATT-----  
AATAAAAGTCTGGAACCTTGGATTACTAACTGGTGGAAATAGCGAGCAATCCGAAACCTTTTTGAATGATATTCAAGAGAA  
AAACGTTCTAGAAAGATTCATAGAACTAGAAGAACTATTCCTCTTG-----  
GACGAAATGATAAAAGAA---  
AACCCAGAGACACATATACAAAAGTTTTCGTATAGAAATACACAAGCAAACAATACAATTGATCAAAAACACACAATGAATA  
TAATCTCCATATCATTGTCATTTCTCCACAAATATAATCTGTTTTGTTATTCTAGGTGGTTATTTTTTCTGAGTAATG  
AAGAACTTATCATTCTTAATTTCTTGGATTTCAGGAATTATTGTATAACTTAAGTGACACAATAAAGGCTTTTTTCTATTCTT  
TTAATCACTGATTTATGGATCGGATTTCACTCCACCCATGGTTGGGAACTAATGATTGGTTCGGTCTACAACGATTTTGG  
ATTGGCTCATAACGATCAA-----  
ATTATATCTGGTCTTGTTCCTACTTTTCCAGTTATTCTAGATACAATTGTGAAATATTGGATTTTCCATTATTTAAATCG  
TGTATCTCCTTCACTTGTAAATTTTATCATTCAATGAATGAA-----  
ATGCCTATTGGTGTTCAAAAGTACCTTTTCGGAGTCT-----  
-----GGAGAGGAAGAT-----  
--CGGTTTTGGGTTGACGTA---AACCGACTTCATCGAGAAAGATTACTT---  
TTTTTGGGCCAAGAGGTTGATAATGAGGTCTCAAATCAAC

Drinys

TGTTAATGAACAAGACGTACTTCTATTTATCGACAATATCTTCCGTTTTCGTCCAAGCAGGATCAGAAGTATCCGCCTTGT  
TAGGTAGAATGCCTTCTGCTGTGGGTTATCAACCTACCCTTAGTACAGAAATGGGTTCTTTACAAGAAAGAATTACTTCT  
ACCAAAGAGGGATCTATAACTTCTATTCAAGCAGTTTATGTACCTGCTGACGATTTGACCGACCCTGCTCCTGCTACGAC  
ATTTGCACATTTAGATGCTACTACTGTACTATCAAGAGGATTAGCTGCCAAAGGTATCTATCCAGCAGTAGATCCTTTAG  
ATTC AACGTCAACTATGCTCCAACCTAGGATCGTTGGCGAGGAACATTATGAAACTGCGCAAAGAGTTAAGCAAACCTTCA  
CAACGTTACAAAGAACTTCAGGACATTATAGCTATCCTTGGGTTCGGACGAATTATCCGAAGAAGATCGTTTAAACCGTAGC  
AAGAGCACGAAAAATTGAGCGTTTCTTATCACAACCTTCTTCGTAGCAGAAGTATTTACTGGTCTCCAGGGAAATATG

TTGGTCTCGCAGAAACAATTAGGGGGTTTTCAACTGATCCTTTCCGGAGAATTAGATGGTCTTCCCGAACAGGCCTTTTAT  
TTGGTGGGTAACATCGATGAAGCTACCGCGAAGGCTATGAACCTTAGAT-----GTGGAG---AGCAAATTGAAG-----  
-  
ATGACCTTAAATCTTTGTGTACTGACTCCTAATCGAATTATTTGGGATTTCAGAGGTGAAAGAAATTATTTTTATCTACGAA  
TAGTGGCCAAATTGGCGTATTACCAAATCACGCCCTATTGCCACAGCTGTAGATATAGGTATTTTGAGAATACGC---  
CTC-----  
AACGACCAATGGTTAACGATGGCTCTGATGGGTGGTTTTCGCTAGAATAGGCAATAATGAGATCACCATTTTAGTAAATGA  
TGCGGAGAGGGGTAGTGACATTGATCCGCAAGAAGCTCAGCGAACTCTTGAAATAGCCGAAGCTAGCTTGAGTAGAGCTG  
AAGGCAAGAGACAAGAAATTGAGGCGAATCTAGCTCTCCGAAGAGCTAGGACACGAGTAGAGGCTATCAATGTTATTTTCG  
TAC-----ATGAAAAATGTAACCGATTCTTTTCGTTTTCC---TTG---  
GGTCACTGGTTCATCCGCCGGGAGTTTTCGGGCTT---  
AATACCGATATTTTAGCAACAATCCAATAAATCTAAGTGTAGTGCTTGGTGTATTGATCTTTTTTTGGAAAGGGAGTA--  
-----  
???AGTGATTTATTAGATAATCGAAAACAGAGGATCTTGAGTACTATTCGAAATTCAGAAGAAGACTACGTGGAAGAGCCAT  
TGAGCAGCTCGAAAAAGCCCGGGCTCGCTTACGGAAAATAGGAATGGAAGCAGATGAGTTTTCGAGTGAATGGATACTCTG  
AGATAGAACGAGAAAAAGAGAATTTGATTAATGCTACTTATAATAATTTGGAACGATTAGAAAATTTCAAAAATGAAACC  
ATTCGTTTTGAAGAACAACGAGCAATTAATCAGGTACGACAACGAGTGTTCAGCAAGCCTTACAAGGAGCTCTAGGAAC  
TCTGAATAGTTGTTTTG-----  
AACAGTGAGTTACATTTACGCACCATCAGTGCTAATATTGGCATGCTCGGGACCATCAAA-----GAAATA---  
ACTGAT---  
ATGAATCCACTGATTTCTGCCGCTTCCGTTATTGCTGCTGGATTGGCCGTAGGGCTTGCTTCAATTGGACCTGGGGTTGG  
TCAAGGTACTGCTGCGGGTCAAGCTGTAGAAGGTATTGCGAGACAACCAGAAGCAGAGGGTAAAATACGAGGTACTTTAT  
TGCTTAGTCTGGCTTTTATGGAAGCTTTAACAATTTACGGACTGGTCTGGCATTAGCGCTTTTATTTGCGAATCCTTTT  
GTT---ATGAATGTTCTA-----CCATGTTCCATTAACACACTC---AAA---GGGTTA---  
TACGATCTATCCGGTGTGGAAGTAGGCCAACATTTCTATTGGCAAATAGGGGGTTTTCCAAGTCCATGCCCAAGTACTTAT  
CACTTCTTGGGTGCTAATTGCTATCTTATTAGGTTTCAGCCACTATAGCTGTT---  
CGGAACCCACAACCATTCCAACCTAAGAGTCAGAATTTCTTCGAATATGTACTTGAATTCATTTCGAGACTTGAGCAAAAC  
CCAGATTGGA---  
GAAGATTATGGTCTTGGGTTCCCTTTATTGGAACATGTTCCATTTATTTTTGTTTTCTAACTGGTCAGGTGCTCTTTT  
ACCTCGGAAAATCGTACAGTTACCTCACGGGGAGTTAGCTGCACCCACGAATGATATAAATACTACTGTTGCTTTAGCTT  
TACCCACGTCAGTGGCATATTTCTATGCGGGTCTTACTAAAAAAGGATTGGGCTATTTTCGGTAAATACATTCAACCAACT  
CCAATACTTTTACCAATTAACATCCTAGAAGATTTACAAAACCTTTATCACTTAGTTTTCGACTTTTCGGGAATATATT  
GGCTGATGAATTAGTAGTTGTTGTTCTTGTCTTTAGTACCTTTAGTGGTTTCTATACCTGTCTGTTTCTTGGATTAT  
TCACAAGCGGGATTCAAGCTCTTATTTTTGCGACTTTAGCCGCGGCTTATATAGGTGAATCCATGGAGGGTCATCAT---  
---  
ATGATATTCGCGACTTTAGAACATATATTAACCTCACATATCTTTTTTCGATCATTTCGAATTGTTATTACGATTCAATTGAT  
AGAC-----TTATTA---GTC-----  
TATCAAATCGTAGGAATATGTGATTCATCAGAAAAGGCATTATAGCTACTTTTTTCTGTATAACAGGATTATTAATAAC  
TCGTTGGATTTATTCGAGACATTTCCCGTTAAGTGATTTATATGAATCATTAAATGTTCCTTTTCATGGAGTTTCTCCATTA  
TTCATATGGTTCCTAAA-----GCGGGG---AACATAAAAATGAT---  
TTAAGCGCAATAACTGGGCCAAGTGCTATTTTTACCCAAGGCTTTGCCACTTCAGATCTTTAACTGAAATGCATCAATC  
CGCAATATTAGTACCCGCCCTACAATCCCAGTGGTTAATGATGCACGTAAGTATGATGTTATTGAGCTATGCAGCTCTTT  
TATGTGGAGCGTTATTATCAGTAGCTTTTCTAGTCATCACATTTCGAAAAAAC---ACAGATATTGCTGTT-----  
AAAAGCAATTATTTA-----TTA---ATTGGGACATTTTCTTTGGTGAGATCCAATACTTGAAT-----  
GAGAAA-----AGAAGTGTTTTA-----CAA-----AACACTTCT-----TTTCT-----  
-  
TCATTTAGAAATTATCACAGGTATCGATTGACTCAGCGATTGGATCATTGGAGTTATCGTGTCTATTAGTCTAGGGTTTAT  
CTTTTCAACCATAGGTATTCTTTTCGGGAGCAGTATGGGCTAATGAGGCATGGGGATCTTATTGGAATTGGGACCCCAAGG  
AAACTTGGGCATTTATTACTTGGACCATATTCGCAATTTATTTACATACTAGAACA-----  
AATCAAAGTTTGAAGGT-----  
GTGAATTCGTCAATTGTAGCTTCTATCGGATTTCTTATAATTTGGATATGCTATTTTGGGGTCAATCTATTAGGAATAGG  
GCTACATAGTTATGGTTCATTACATTAACAGCG-----  
-----GTGCCA---AAAAAGAAA-----  
-----AAAGCATTGACTCCCCTCCA-----TATCTTGCATCTATAGTCTTT-----  
TTGCCCTGGTGGATCTCTCTCATT-----  
AATAAAAGTCTGGAACCTTGGGTTACTCATTGGTGGAAATACCAGGCAATCCGAAACTTTTTTGAATGATATTCAAGAAAA  
TAACGTTCTAGAAAGATTATAGAATTAGAAGAACTATTCTGTTGGACGAAATGATAAAGTTGGACGAAATGATAAAGG

AC---

TACCCGGAGACACAGATACAAAAGTTTTCGTATAGGAATCCACAAAGAAACGATACAATTGATCAAAATGCACAATGAAGA  
TCATATCCATATCATTTCGATTTCTCGGCAAATATAATCTGTTTCGCTATTTTTAGCGGTTATTCTATTCTGGGTAATG  
AAGAACTTGTCAATTTGAATTCCTGGGTTTCAGGAATTCCTCTATAACTTAAGTGACACAATAAAAGCTTTTTCTATTCTT  
TTATTAACCTGATTTATGTATCGGATTCCACTCGCCTTTTGGTTGGGAACATAATGATTGGCTCGGTCTACAAAGATTTTGG  
ATTTGCCATAATGATCAA-----  
ATTATATCTGGTCTTGTTCCTACCTTTCCAGTCATTCTAGATACAATTTTGAATATTGGATCTTCCATTATTTAAATGG  
TGTATCTCCTTCACCTGTAGTCATTTATCATTCAATGAATGAA-----  
ATGCCCATTTGGTGTTCACAAAAGTACCTTTTCGGAGTCCT-----GGAGAGGAAGAT-----  
--GCAGTTTGGGTTGACGTATAACAACCGACTTCATCGAGAAAGATTACTT---  
TTTTTAGGACAAGAGGTTGATAGCGAGATCTCGAATCAAC

Eucalyptus

TGTTAATGAACAAGACGTAATCTTATTTATCGACAATATCTTCCGTTTCGTCCAAGCAGGATCTGAGGTATCCGCCTTAT  
TGGGTAGAATGCCTTCTGCTGTGGGTTATCAACCTACCCTTAGTACCGAAATGGGTACTTTACAAGAAAGAATTACTTCT  
ACCAAAGAGGGATCCATAACTTCTATTCAAGCAGTTTATGTACCTGCGGACGATTTAACCGACCCTGCTCCTGCCACGAC  
ATTTGCACATTTAGATGCTACGACCGTACTATCAAGAGGATTAGCTGCTAAAGGTATCTATCCAGCAGTAGATCCTTTAG  
ATTTCAACGTCAACTATGCTCCAACCTCGAATCGTTGGTGAGGAACATTATGAAACTGCACAAAGAGTTAAGCAAACCTTTA  
CAACGTTACAAAGAACTTCAGGACATTATAGCTATCCTTGGGTTGGACGAATTATCTGAAGAGGATCGCTTAACCGTAGC  
AAGAGCACGAAAAATTGAGCGTTTCTTATCCCAACCCTTTTTTCGTAGCAGAAGTATTTACCGGTTCCCGGGGAAATATG  
TTGGTCTAGCAGAAACAATTAGAGGGTTTAAATTGATCCTTTCCGGAGAATTAGATGGTCTTCTGAACAAGCCTTTTAT  
TTGGTAGGTAACATCGATGAAGCTACTGCGAAGGCTACGAACCTTAGAA-----ATGGAG---AGTAAATTGAAGAAA--  
-

ATGACCTTAAATCTTTGTGTACTAACCCCTAATCGAATTGTTTGGGATTCAGAAGTGAAAGAAATCATTTTATCTACTAA  
TACTGGACAAATTGGCGTATTACCAAATCACGCGCCTATTGCCACAGCTGTAGATATAGGTATTTTGGAGAATACGC---  
CTT-----  
AACGACCAATGGTTAACAATGGCTCTGATGGGTGGTTTTGCTAGAATAGGCAATAATGAGATCACTATTTTGTAAATGA  
CGCGGAAAAGGGTAGTGATATTGATCCACAAGAAGCTCAGGAAACTCTTGAAGTACGCGGAAGCTAACTTAAGAAAAGCTG  
AAGGTAAGAGACAAACAATTGAGGCAAATCTAGCTCTCAGACGAGCTAGGACACGAGTCGAGGCTATCAATGCAATTTCA  
-----ATGAAAAATGTAACCGATTCTTTTCGTTTTCC---TTG---  
GGTCACTGGCCATCGGCCGGGAGTTTCGGATTT---  
AATACCGATATTTTAGCAACAAATCCAATAAATCTAAGTGTAGTCCTTGGTGTATTGATCTTTTTTGGAAAGGGAGTG--  
-----

TTAAGCGATTTATTAGATAATCGAAAACAGAGGATCTTGAATACTATTTCGAAATTCAGAAGAATTACGCGGCGGGGCCAT  
TGAACAGCTGGAAAAGCCCGGGCCCGTTTACGGAAAGTGGAAATGGAAGCGGAGCAGTTTCGAGTGAATGGATATTCTG  
AGATAGAACAAGAAAAGTTGAATCTGATTAATTTCAACTTATAAGACCTTGGAAACAATTAGAAAATTACAAAAACGAACT  
ATTCATTTTGAACAGCAAAGAGCGATTAATCAAGTCCGACAACGGGTTTTCCAACAAGCCTTACAAGGAGCTCTAGGAAC  
TCTGAATAGTTGTTG-----  
AACAACGAGTTACATTTACGTACTATCAGTGCTAATATTGGCATGTTTGGGGCGATGAAA-----GAAATA---  
ACTGAT---

ATGAATCCACTGATTTCTGCCGCTTCCGTTATTGCTGCTGGGTTAGCTGTGCGGGCTTGCTTCTATTGGACCTGGAGTTGG  
TCAAGGTACTGCTGCGGGCCAAGCTGTAGAAGGTATTGCAAGACAGCCCGAGGCGGAGGGAAAAATACGAGGTACTTTAT  
TGCTTAGTCTGGCTTTTATGGAAGCGTTAACAATTTATGGATTGGTTGTAGCCTTAGCGCTTTTATTTGCGAATCCCTTT  
GTG---ATGAATGTTTTA-----TCATGTTCCACCAACACACTA---AAA---GGGTTA---  
TACGATATATCGGGTGTGGAAGTAGGCCAACATTTCTATTGGCAAATAGGAGGTTTTCAAGTCCATGGCCAAGTCCTTAT  
TACTTCTTGGGTTGTAATTGCTATCTTATTAGGTTCCGCCAGTATAGCTGTT---  
CGGAATCCACAACCATTCCGAATGACAGTCAAAATTTCTTCGAATATGTCCTTGAATTCATTTCGAGACGTTAGCAAAC  
TCAGATTGGA---

GAAGAATATGGTCCATGGGTTCCTTTTATTGGAACATGTTCCCTATTTATTTTTGTTTCGAATTGGTCAGGGGCTCTTTT  
ACCATGGAAAATCATAGAATTACCTCATGGGGAGTTAGCCGCACCCACGAATGATATAAATACTACCGTTGCTTTAGCTT  
TACTCACGTCAGTAGCATATTTCTATGCAGGTCTTACCAAAAAGGATTAAGTTATTTTCAGTAAATACATTCAACCAACT  
CCAATCCTTTTACCCATTAACATCTTAGAAGATTTACAAAACCTTTATCACTTAGTTTTTCGACTTTTCGGAAATATATT  
AGCCGATGAATTAGTAGTTGTTGTTCTTGTTCCTTTAGTACCTTTAGTGGTTCCCTATACCTGTCATGTTCCCTTGGATTAT  
TTACAAGTGGTATTCAAGCTCTTATTTTTGCAACTTTAGCCGCGGCTTATATAGGTGAATCCATGGAGGGTCATCAT---  
---

ATGATATTTTCCACCTTAGAACATATATTAACCTCATATATCCTTTTCGATCATTTCAATAGTAATTACTATTTTTTTGAT  
AAGC-----TTATCG---GTC-----



GATGAAATCGTAGGACTATATGATTCGTCAGAAAAAGGCATGACAGCTACTTTTTCTGTATAACAGGCTTATTAGTCAC  
TCGTTGGATTTATTCGGGACATTTCCCGTTAAGTGATTTATATGAATCATTATTTTTCTTTTCATGGAGTTTCTCCGTTA  
TTCATATGGTTCCGTAT-----TTTAAA---AAACATAAAAAATTAT---  
TTAAGCACAATAACCGCGCCAAGTACTATTTTTACCCAAGGCTTTGCTACTTCGGGTCTTTAACTGAAATGCATCAATC  
CGAAATAGTAGTACCTGCTCTCCAATCCCAATGGTTAATGATGCATGTAAGTATGATGATATTGGGCTACGCAGCTCTTT  
TATGTGGATCATTATTATCAGTAGCTCTCTTAGTCATTACATTGCGAAAAGCC---ATAAGGGTTTTTAGT-----  
AAAAAAAACAATTTT-----TTA---AATGAGTCATTTTCCTTTGTCGAGATCCAATACATGAAT-----  
GAAAGA-----AGCAATGTTTTA-----CTA-----ACCACTTCT-----TTTTGT-----  
-

TCTTCTCGAAATTATTACAGGGCTCAACTGATTCAACAACACTAGATCAGTGGAGTTATCGTATTATTAGTCTAGGGTTTCT  
CTTTTTAACCATAGGTATTCTTTTCGGGAGCAGTATGGGCTAATGAGGCATGGGGGTTCATATTGGAATTGGGACCCAAAGG  
AAACTTGGGCATTTTACTTGGACCCTATTTGCGATTTATTTACATACTCGAACA-----  
AATAAAAATTGGGAAAGT-----  
TTTAATTGCGCAATTGTGGCTTCTATAGGCTTTCTTATAATTTGGATATGCTATTTTGGGGTTAATTTATTAGGAATAGG  
ATTACATAGTTATGGTTCATTT-----AATTTACAT-----  
-----ATG---GTAAAAAG-----  
-----AAAGCATTCTTCTCTTCTA-----TATCTTACATCTATAGTATTT-----  
TTGCCCTGGTGGATCTCTCTCTCATT-----  
AATAAAAAGTCTTGAATTTTGGATTACTAATTGGTGGAAATACTAGGCAATCCGAACTTTTTTGGACTGATATTCAAGAAAA  
GAGTATTCTAGAAAAATTCATCGAATTGGAAGAACTCTTACTCTTG-----  
GACGAAATGATAAAAAGAA---  
TACCCGAAACACATCTACAAACACTTCGTATAGGAATCCACAAAGAAACGATCCAATTGATCAAGATGCACAATGAGGA  
TCATATCCATATGATTTTGCACCTTATCGACAAATATAACCTCTTTTATTATTTAAGTGGTTATTCTATTCTGGGTAATG  
AAGAAGTGGTATTCTTAACTCTTGGGTTCAAGAATTCCTATATAACTTAAAGTACACAATAAAAGCTTTTTCTATTCTT  
TTATTAAGTATTATGATCGGATTCCATTGCCCCATGGTTGGGAACTAATGATTGGCTATGTCTACAAAGATTTTGG  
ATTTGCTCACAACGATCAA-----  
ATTATATCGGGTCTTGTCTTACTTTTCCAGTCATTCTGGATACAATTTTTAAATATTGGATCTTCCGCTATTTAAATCG  
TATATCTCCATCATTGTAGTGATTTATCATTCAATGAATGAC-----  
ATGCCTATTGGTGTTCAAAAGTACCCTTTTCAAGTCT-----  
-----GGAGAGGAAGAT-----  
--GCCTCTTGGGTTGACGTATAGAACCAGCTTTATCGAGAAAGATTACTT---  
TTTTTAGGCCAAGAGGTTGATAGCGAGATTTTCAATCAAC

Ginkgo

TGTCAATGAGCAAGACGTACTCTTATTTATCGACAATATCTTCCGCTTTGTCCAAGCAGGATCAGAAGTATCCGCCTTAT  
TAGGTAGAATGCCTTCTGCTGTGGGTTATCAGCCAACCTCTTAGCACGGAAATGGGTTCTTTGCAAGAGAGAATTACTTCT  
ACTAAAGAGGGATCTATAACCTCCATTCAAGCAGTTTATGTACCTGCGGACGATTTGACCGACCCTGCTCCTGCTACGAC  
ATTTGCACATTTAGATGCTACTACCGTACTATCGAGAGGATTAGCTTCCAAAGGTATCTATCCAGCAGTAGATCCTTTAG  
ATTC AACGTCGACTATGCTCCAACCTTGGATTGTGGGCGAGGAACATTACGAAACCGCACAAAGGAGTTAAGCAAACCTTCA  
CAACGTTATAAAGAAGCTTCAAGACATTATAGCTATTCTTGGACTGGACGAATTATCAGAAGAAGATCGTTTAAACCGTAGC  
AAGAGCACGAAAAATTGAACGTTTTTATCACAACCTTTTTCGTAGCAGAGGTCTTACCAGGTTCCCGGGCAAATATG  
TCAGTCTCGTAGAAACAATTAGAGGTTTTAAATGATCCTTTCTGGAGAATTAGATGGTCTCCCCGAACAGGCTTTTTAT  
TTGGTAGGTAACATTGATGAAGCTACCGCGAAGGCTATGAACCTCAA-----GTGGAG---AGT-----  
-

ATGACCCTAAATCTTCGTGTACTGACTCCTAATCGAGTTGTTTGGGATTCGGAAGTGAAGAAATCATCTCATCTACCAA  
TAGTGGTCAAATTTGGCGTATTACCAAACCACTACACTTGTACAGCTGTAGATATAGGAATTATGAAAATACGT---  
CTC-----

AATGGGCAGTGGTCAACTATGGCTTTGATGGGCGGTTTTGCCAGGATAGGCAACGATCAAATTACCGTATTGGTAAATAA  
TGCAGAGAAAGGTATCGACATCGATCCTCGAGAGGCTCGGGAAGCTTTTTCAAATAGCTGAAGCTGACCTAGCTCGAGCTG  
AAGGCAAGAGACAAGCGATTGAGGCTAATGTAGCTCTCAAAGAGCTAGAACACGATTAGAGGCTGTGAGTCTACTTCCG  
ACTTCCGCTCTAAT-----ATGGAAAATGGAATTGATTCTTCTATCTTC---TTG---  
AGTTATTGGCCTTCTGCTGGAGGTTTTCGGTTTT---  
AATACCAATATTTTAGGAACAAATCTAATAAATCTAAGTGTGGTGGTGGTGTACTGATCTATTTTGGAAAGGGAGTGTG  
TGCGGGTTGTATA---

TTAAGTAATTTATTAGATAACCGCAAGCAGAAAAATATTGAATACTATTTCGCAATTTCGGAAGAACTATGTAAAGGAGCTAC  
CGATCAGCTCGAAAAAGCTAGGACTCGCTTACGCGAAGTAGAAAGAAGAGCGGGCGAGATCCGAGTCAATGGATACTCCC  
AAATAGAACGAGAAAAAGAGGATCTGATCAATGCTGCTTATGAAAATTTGGAACGATTAGAGGATCTTAAAAATGAGACC  
GTTCACTTTGAACAACAAAGAGCAATTGACCAGGTCGACAACAGTTTTCTCGTCAAGCTTTGCGAAGAGCTCTAGGAAC

TCTGAATAGTCGTTTG-----  
AATAGCGAGTTACACCTACGTACGATCAATCATAGTATCGGCTTGCTCAGAGCCATGAGA-----AACACA---  
ACTGAT---  
ATGAATCCCTTGATTTCTGCTGCTTCCGTTATTGCTGCTGGATTAGCCGTAGGCCTCGCTTCTATCGGACCTGGTGTGG  
TCAAGGCACTGCTGCGGGCCAAGCTGTAGAAGGTATTGCAAGACAACCAGAAGCAGAGGGTAAAATACGAGGTACCTTAC  
TGCTAAGTCTAGCTTTTATGGAAGCTTTAACTATTTATGGACTAGTTGTAGCGCTAGCACTTTTATTTGCAAATCCCTTC  
GTT---ATGGATATTGTA-----CAATCTCCTATTAGCACACTA---AAT---CATTTC---  
TACGAGAAATCTGGCGTGGAAAGTGGGTCAACATTTCTATTGGCAAATAGGGGGTTTTCAAGTTCATGCACAGGTACTTAT  
AACTTCCTGGGTTGTAATTGCTATCTCATTAGGTTCCGGCTACTATAGCTGTT---  
CGGGATCCACAAACCATTCCGACCGATGGTCAAAAATTTGTGCGAATATGTTCTCGAATTCGTTCCGGACTTGACCAGAAC  
TCAGATTGGGGAAGAAGAATATGGTCCCTGGGTTTCTTTTATCGGAACACTATGTTCTCTATTTTATTCTTATTTCTAACTGGT  
CAGGTGCCCTCCTCCCTTGAAAATGATCCAATTACCTCATGGGGAGTTAGCTGCACCTACAAATGATATTAATACTACT  
GCTGCCCTAGCTTTGCTCACGTACGTAGCATATTTCTACGCAGGTCTTGCAAAGAGGGGGTTAGGTTATTTTCGGCAAATA  
TATTCAACCAACCCCACTACTTTTACCAATTAACATATTAGAGGATTTTACGAAACCTTTATCACTTAGTTTTCGACTTT  
TTGGGAATATATTAGCCGATGAACTGGTAGTTGCCGTTCTTGTCTCTAGTACCTTTGGTGATTCTTATACCTGTAATG  
TTTCTAGGATTATTTACAAGCGCTATTCAAGCTCTGATCTTTGCAACTTTAGCCGCAGCTTATATAGGCGAATCTATGGA  
GGGTCATCAT-----  
ATGATATTCACAACCTTTAGAACATATATCAGCTCACATCTCTTTTTCTCTCGTGTCTGTTGTCCTCTCGCTTATTGGGG  
AACC-----TTG---GTC-----  
TATCAAATTTGAAGCACTAAGTCGTTCCGGGAGGAAGAGGCATGATAGTGATTTCTGTCTGTATAACGGGATTGTTAATTAC  
TCGTTGGCTTTCTTCGGGACATTTACCCTTAAGTAATTTGTATGAATCCTTCATGTTCTTTTCGTGGAGTTCATCTGTGA  
TTCATATAGTTCTAGAA-----GTACGG---  
AGCCAAAATAATCGGTGGTTAGGCGCAATCACTGCACCAAGTGCTATGTTAACTCATGGTTTTGCTACTTTGGGTCTTCC  
GGAGGAAATGCAACAATCTACAATGTTAGTACCTGCTCTACAATCTCATTGGTCAATGATGCATGTAAGTATGATATTGC  
TTGGCTATGCAACCCTTTTATGCGGATCCCTATTATCAATAGCTTTTTTGGTCAATTACATTTTCAATTAAT---  
AGGAGGATTATCCCCCCCCTAGTGCGATGGACAATTCA-----TTC---  
ATTTGGTTCTTTTATTATAGAAATAGTTGGTATTTACAC-----GAACAA-----AAAAAATTGATTTG-----  
CAA-----GACACTTTT-----TCCTTG-----  
TTATTCATGAATTTATCGTAGGTGTCAATTGACTCAACAATTAGATCATTGGAGTTATCGTGCTATTGGTCTAGGTTTTCT  
TCTTTTAACTATAGGTATTCTTCTGAGCAGTATGGGCTAATGAAGCATGGGGATCTTATCGGAGCTGGGACCCAAAAG  
AGACCTGGTCATTAATACTTGGACTATATTTGCAATTTATCTGCATTCTAGAATG-----  
AATAAAGGTTGGCAAGGT-----  
GAGAAACCGCAATTGCGGCTTCTCTAGGATTTTTTATAATTTGGATCTGTTATTTGGGGGTGCTATATTAGGAATAGG  
TTTGCACAGCTATGGATGGTTG-----  
ATAGGTCCCATAACCTCGTTCTATAACTCGTACTTTATCCAGATTTCCGGACAGAGCTGACGAGTGAATCAAGTCCGTTAGT  
GATTCACGAATTGAAAGTG---GCCAAATAT-----AAAGTATCAGCTTCCCTACAA-----  
TATCTCGCATTTTTAGTATTC-----CTGCCCTGGGGATCTCGATTTTCATT-----  
CAGGAAGGTTTGGGACCTTGGGTTACGAATTGGTGGAAACTGTTGCTCAGTCAAAAATTTTTTTTTTCTTATCTTCAAGAGGA  
AAATGCCCTAGAAAGATTCCGAGAGATAGAAGAACTATTCTATTG-----  
GAAAGAATGGTGGAAAGAT---  
TCTTCGGAAACACATTCACAAGATCTTCGTATAGAGATTCACAGAAAAACAATCCAATTAGTGAAAATGTACAATAAAGA  
TTGTATCCAGATCATCTCGCATTTATTGACAAATATGATATGTTTCGCTATTTCAAGTGCTTATTTTATTATGAGTAAGA  
AAAACTTACCCTTCTCAATTCTTGGATCCAAGAATTATTCTATAGCCTGAGCGATACGATGAAAGCTTTTTTCTATTATT  
TCAGTACCCTGATCTATGATTGGGTTTCATTGACTCATGGTTGGGAACTGATGATCGATTGATCTCTGAAAATTATGG  
ATTTGTCCATAACGAACA-----  
ATAATATCTGGTCTTGTTCAACTTTTCCAGTCACTCTCAGATACGATTTTCAAATATTGGATCTTCCGTCATTTCAATCG  
TATATCCCCTCCACTTGTAGTAATTTATCATTGATGAATGAA-----  
ATGCCCATGGTGTCCAAAAGTTCCTTTTCGGATCCCT-----  
-----GGAGAGGAAGAT-----  
--GCAGTTTGGGTCGACGTA---AACCGACTTCATCGGGAGAGATTACTT---

Glycine

TGTCAATGAACAAGATGTACTTCTATTTATCGACAATATCTTTTCGCTTCGTCCAAGCAGGATCTGAAGTATCTGCCTTAT  
TGGGTGCAATGCCTTCTGCTGTGGGTTATCAACCCACTCTTAGTACTGAAATGGGTTCTTTACAAGAAAGAATCACTTCT  
ACCAAAGAGGGGTCCATAAATTCTATTCAAGCAGTTTATGTACCCGCAGACGATTTAACCAGTCTGCGCCTGCTACGAC  
ATTTGCACATTTAGATGCTACTACTGTACTATCAAGAGGATTAGCGGCCAAAGGTATCTATCCAGCAGTAGATCCTTTAG  
ATTC AACCTCAACTATGCTCCAACCTCGAATCGTTGGTGAAGAACATTATGAGACTGCGCAAAGAGTTAAACAACTTTA

CAACGTTACAAAGAACTTCAAGACATTATAGCTATCCTTGGCTTGGACGAATTATCCGAAGAAGATCGCTTAACCGTAGC  
AAGAGCACGAAAAATTGAGCGTTTCTTATCACAACCTTTTTTCGTAGCAGAAGTTTTTACC GGTTCCGCCGGGAAATATG  
TTAGTCTAGCAGAAAACAATTAGAGGGTTTTAAATTGATTCTTTCTGGAGAATTAGATGGTCTTCTGAACAAGCCTTTTAT  
TTGGTAGGTAATATCGATGAAGCTACTGCGAAAGCTACGAACTTAGAA-----ATGGAG---AGCAATTTGAAGAAA--  
-  
ATGACTTTAAATCTTTGTGACTGACCCCAATCGAATTGTTTGGGATTCGGAAGTGAAGGAAATCATTTTTATCTACTAA  
TAGCGGACAAATTGGAGTATTACCAATCATGCGCCTATTGCCACAGCCGTAGATATAGGTATTTTGAGAATACGT---  
CTTCTT-----  
AAAGACCAATGGTTAACGATGGCTCTGATGGGCGGTTTTGCTAGAATAAACAATAATGAGATCACTGTTTTAGTAAATGA  
TGCGGAAAAGGGTAGTGACATTGATCCACAAGAAGCACAGCAAACCTTTGAAATAGCAGAAGCTAATTTGAATAAGGCGG  
AAGGCAAGAGACAAAACAATTGAGGCAAATCTAGCTCTTAGACGAGCTAGGACACGAGTAGAGGCTATCAATGTGATTTCA  
-----ATGAAAAATATAACCGATTCTTTCCTTTGT---TTG---  
GGCTACTGGCCATCCGCCGGAAGTTTCGGGTTT---  
AATACCGATATTTTAGCAACAAATCCAATAAATCTTAGTGTAGTGTTAGGTGTATTGGTTTTTTTTTGGAAAGGGAGT?--  
-----  
TTAAGTGATTTATTAGATAATCGAAAACAGAAAATCTTGAGAACTATTCGAAACTCAGAAGAATTACGGGAAGGGGCCAT  
TGAACAGCTGGAAAAGCCCAAGCCCGCTTAAGGAAAGTTCGAAACGGAAGCAGATCGTTTTTCGGGTGAATGGCTATTCTG  
AGATCGAACGAGAAAAATTGAATTTAATTAATTTCAATTTATACGACTTTGGAACAATTAGAAAATTACAAAAACGAAGCC  
ATTCATTTTGAACAACAAAGAGTGATTAATCAAGTCCGACAACGGGTTTTACAACAAGCCTTACAGGGAGCTCTAGGAAC  
TCTAAAGAGTTGCTTG-----  
ACAACGAGTTACATTTACGTACTGTCAGTGCTAATATTGGCATGTTTGGGACGATGAAA-----  
GAAAAAATAACTGAT---  
ATGAATCCAATTTTCTGCTGCTTCTGTTATTGCTGCTGGGTTGGCCGTAGGGCTTGCTTCTATTGGACCTGGGGTTGG  
TCAAGGCACTGCTGCAGGGCAAGCTGTAGAAGGGATTGCACGACAACCGGAGGCAGAGGGAAAAATACGAGGTACTTTAT  
TGCTTAGTTTGGCTTTTATGGAAGCTTTAACAATTTATGGACTGGTTGTAGCATTAGCACTTTTATTTGCTAATCCTTTT  
GTT---ATGAATGTTTTA-----TTATGCTCTATCAACACATTA---AAA---AGATTA---  
TATGATATATCTGCTGTGGAAGTAGGTCAACATTTCTATTGGCAAATAGGGAGTTTCCAAGTACATGCCCAAGTACTTAT  
TACTTCTTGGGTTGTAATTGCTCTCTTATTGGTTTTAGCCATTCTAATTATT---  
CGAAATCTGCAAACATTTCCCGCTTTCCGGTCAGAATTTCTTTGAAATATGTTCTTGAATTCATTTCGAGACGTGAGCAAAC  
TCAAATTGGA---  
GAAGAATATGGTCCGTGGGTTCCTTTTATTGGAACTTGTTTCTAATTTATTTTTGTTTCTAATTGGTTCGGGGGCTCTTTT  
ACCTTGGAAAATCATACAATTACCTCACGGGGAGTTAGCTGCACCCACAAATGATATAAATACTACC GTTGGCTTTAGCTT  
TACTTACATCAATTGCATATTTCTATGCGGGTCTTTCAAAAAAAGGATTAGCTTATTTTAATAAATACATCCAACCAACC  
CCAATCCTTTTACCGATTAACATCTTAGAAGATTTCAAAAACCTTATCTCTTAGTTTTCGACTTTTTCGAAATATATT  
AGCTGATGAATTAGTAGTTGTTGTTCTTGTCTTTAGTACCTTTAGTAGTTTCTATACTGTGTTCTTGGATTAT  
TCACAAGCGGTATTCAAGCTCTCATTTTTGTACTTTAGCTGCGGCTTATATAGGTGAATCCATGGAAGGCCATCAT---  
---  
ATGGTATTTGCAAGTTTAGAACATATATTAACTCATATATCGTTTTTCGGTTCGTATCTATTTTAATTTCAATTCATTTGAT  
AACC-----TTATTATTTGTC-----  
AAAGAAATCATAGGATTATCTGATTCGTCCAAAAAAGGCATGATAATAACTTTTTTTTTGTATAACAGGATTGTTAGTTAC  
TCGTTGGGTTTTTTTCAGGCCATTTACCGTTTTAGTGATTTATATGAATCATTAAATTTCTTTTCATGGACTTTTTCCATTT  
TTTATATGGTTCCTTAC-----TTCAAAAAATCTAAAAACTACTAT---  
TTAAATACAATAATAACACCAAGTGTTATTTTACCCAAGGCTTTGCTACTTCGGGGCTTTTAAACGAAAATGCATGAATC  
GTTAATATTAGTACCTGCTTTACAGTCCCATTGGTTAATGATGCACGTAAGTATGATGATATTGGGTTATGCAACTCTTT  
TATGCGGATCATTATTATCAGTGGCTATTTTAGTCATTACATTTCAAGAACTC---ATACAAATATTGGT---  
AAAAGCAAGAATTTCTATTTT-----TTA---  
AATGAATCATTTTCTTTTGGCTGAAATCAAATACATGAATATGACTGATAAA-----AATAATGTTTTA-----  
CAA-----AAAACCTTCT-----TTTTTG-----  
TCTTATAGAAATTATTATAGATCTCAATTTCTTCAACAATTGGATCGTTGGGGTTACCGTACTATTAGTCTAGGTTTTTAT  
CTTTTTAACGATAGGTATTATTTTCCAGGAGCAGTATGGGCTAATGAGGCATGGGGATCATATTGGAATTGGGATCCAAAGG  
AAACTTGGGCTTTTATTACTTGGACTATATTCGCGATTTATTTACATACTAGAAAA-----  
AATAAAAAATTGGAAGAT-----  
CTAAATCTTCAATAGTCGCCTCCATAGGTTTTCTTATAATTTGGGTATGTTATTTAGGTATAAATCTTTTAGGAATAGG  
ACTACATAGTTATGGTTCATTT-----ACACCTAAT-----  
-----ATG---ACAAAAAG-----  
-----AAAACATTCATTCCCCTTCTA-----TATCTTACATCTATAGTCTTT-----  
TTGCCCTGGTGTATCTCTTTCACATTT-----

AAGAAAAGTCTCGAATCTTGGTTTTATTGATTGGTGAATACTAGGCAATCCGAAATTTTCTTGAATGATATTAAGAAAA  
GAGTATTCTAAAAAATTCATAGAATTTGAAGAAGTGTTCCTTA-----  
GATGACATGTTAAAGGAA---  
TGTCCGGAAACACATCTACAAAACCTGCGTACTGGAATCTATAAAGAAACAATCCAATTAATCAAAACGCACAACGAAGA  
TCGTATGAATACGATTTTGCACCTTCTCGACAAATATAATTTGTTTCTTTATTCTAAGCGGTTATTCTATTCTTGGTAATC  
AAGAAGTTGTTCTTATTAACCTTTTGGTTCGAGAATTTATATATAATTTAAGTGACACAATAAAGCTTTTTCTATTCTT  
CTATTAACCTGATTTATGTATAGGATTCCATTCAACCCATGGTTGGGAAGTGTGATTGGTTTCGTCTATAAAGATTTTGG  
ATTTGCTCAAAATGATCAA-----  
ATTATATCTGGTCTTGTTCCTACTTTTCCAGTCATTTTAGATACAATTTTAAAATATTGGATTTTTCGTTATTTAAATCG  
CGTATCTCCATCACTTGTAGTGATTTATCATTCAATGAATGAT-----  
ATGCCCATTGGTGTTCGAAGAGTACCCTTTTCAAGCCCT-----GGGAAGAAGAT-----  
--GCATCTTGGGTTGATATATAACAATCGACTTTATCGAGAAAGATTACTT---  
TTTTTAGGTCAAGAGGTTGATAGTGAAATATCGAATCAAC

Gossypium

TGTTAATGAACAAGACGTACTTCTATTTATAGACAATATCTTCCGTTTTGTCCAAGCGGGATCCGAAGTATCTGCCTTAT  
TGGGTAGAATGCCTTCCGCTGTGGGTTATCAACCCACCCTTAGTACCGAAATGGGTACTTTACAAGAAAGAATTACTTCT  
ACCAAGGAGGGATCCATAACTTCTATTCAAGCAGTTTATGTACCTGCGGATGATTTGACCGACCCTGCCCTGCCACAAC  
ATTTGCGCATTTAGATGCTACTACCGTACTATCAAGAGGATTAGCTGCCAAAGGTATTTATCCAGCGGTAGATCCTTTAG  
ACTCAACGTCCACTATGCTCCAACCTCGAATCGTTGGTGAGGAACATTATGAAACTGCGCAAAGGGTTAAGCAAACCTTA  
CAGCGTTACAAAGAAGTTTCCAGGACATTATAGCTATCCTTGGGTTGGACGAATTGTCCGAAGAGGATCGCTTAACCGTAGC  
AAGAGCGCGAAAAATTGAGCGTTTCTTATCACAACCTTTTTCGTAGCGGAAGTATTTACCGGTTCCCGGGGAAATATG  
TTGGTCTAGCAGAAACAATTAGAGGATTTAAATTGATCCTTTCCGGAGAATTAGACGGTCTTCTGAACAGGCCTTTTAT  
TTGGTAGGTAACATCGACGAAGCTACTGCGAAGGCTACGAACCTTAGAA-----ATGGAG---AGCAAATTGAAGAAA--  
-

ATGACCTTAAATCTTTGCGTACTTACCCCTAATCGAATTGTTTGGGATTCAGAAGTGAAAGAAATCATTTTATCTACTAA  
TAGCGGACAAATTTGGCGTATTACCAAATCACGCGCCTATTGCCACAGCTGTAGATATAGGTATTTTGAGAATACGC---  
CTT-----

AACGACCAATGGTTAACGATGGCTCTGATGGGTGGTTTTGCTAGAATAGGCAACAATGAAATCACTATTTTGTAAATGA  
TGCGGAGAAGGGTAGTGACATTGATCCACAAGAAGCTCAGCAAGCTCTTGAAATAGCGGAAGCTAACTTGAGGAAAGCTG  
AAGGCAAGAGGCAAAACAATTGAGGCAAATCTAGCTCTCAGACGGGCTAGGACACGAGTCGAGGCTATCAACGCGATTTCCG  
-----ATGAAAAATGTAACCGATTCTTTCGTTTCC---TTG---

GGTCACTGGCCATCCGCCGGGAGTTTCGGGGTT---  
AATACCGATATTTTAGCAACAAATCCAATAAATCTAAGTGTAGTCCTTGGTGTATTGATCTTTTTTGGAAAGGGAGTG--  
-----

TTAAGTGATTTATTAGATAATCGAAAAGAGAGGATCTTGAATACTATTTCGAAATTCAGAAGAAGTACGCGGGGGGGCTAT  
TGAACGGCTGGAAAAGGCCCGGGCCCGCTTACGGAAAGTAGAAATGGAGGCGGATCAGTTTCGAGTGAATGGATACTCTG  
AGATAGAACGAGAAAAATTGAATTTGATTAATTTCAACTTATAAGATTTTGGAAACAATTAGAAAATTACAAAAATGAAACC  
ATTTATTTTGAACAACAAGAGCGATTAATCAAGTCCGACAACGGGTTTTCCAACAAGCTTTACAAGGAGCTCTAGGAAC  
TCTGAATAGTTCTTTA-----

AACAACGAGTTACATTTACGCACCATTAGCGCTAATATTGGCTTGTTCGGGGTGTGAAA-----GAAATA---  
ACTGAT---

ATGAATCCACTGATTTCTGCCGCTTCCGTTATTGCTGCTGGGTTGGCTGTCCGGCTTGCTTCTATTGGACCTGGAGTTGG  
TCAAGGTACTGCTGCGGGCCAAGCTGTAGAAGGTATCGCGAGACAACCCGAGGCGGAGGGAAAAATACGAGGTACTTTAT  
TGCTTAGTTTGGCTTTTATGGAAGCTTTAACAATTTATGGGCTGGTTGTAGCATTGGCACTCTTATTTGCGAATCCCTTT  
GTT---ATGAATGGTATA-----TCA-----AACGCACTA---AAC---GGTTA---

TACGATATCTCTGGTGTGGAAGTAGGCCAACATTTCTATTGGCAAATAGCAGGTTTCCAAGTCCATGCCCAAGTACTTAT  
TACCTCTTGGGTTGTAATTGCTATCTTATTAGGTTCCGCCGTTATCGCTGTT---

CGGAATCCACAACCAATCCAACCGCGGTCAAAATTTCTTCGAATATGTTCTTGAATTCATTGAGACGTAAGCAAAAC  
TCAGATTGGA---

GAAGAATATGGTCCATGGGTTCCCTTTATTGGAACATGTTTCTATTTATTTTGTTCCTAACTGGTCCGGTGTCTGTT  
ACCTTGGAAAATCATAACAATTACCTCATGGAGAGTTAGCCGCACCCACGAATGATATAAATACTACTGTTGCTTTAGCTT  
TACTCACGTGAGTAGCATATTTCTATGCGGGTCTTTCAAAAAAAGGATTGGGGTATTTTCAAGTAAATACATTCAACCCACT  
CCAATTTCTTTTACCTATTAACATTTTAGAGGATTTTCAAAAACCTTATCACTTAGTTTTCGACTTTTCGGGAATATATT  
AGCTGATGAATTAGTAGTTGTTGTTCTTGTTCCTTTAGTACCTTCAGTCGTCCCTATACCTGTCATGTTCTTGGATTAT  
TTACAAGTGGGATTCAAGCTCTTATTTTGTCAACTTTAGCTGCGGCTTATATAGGCGAATCCATGGAGGGTCATCAT---  
---

ATGATTTTTTCAACTTTAGAGCATATATTAACCTCATATATCTTTTTTCAGTCGTTTTCAATTGTAATTACAATTCATTTTTT  
AACCTTATTCTTATTA---GTA-----  
GATGAAGTCGTAGGACTATATGATTCATCAGAAAAGGGCATGATAGTCACCTTTTTCTGTATAACAGGATTATTAGTCAC  
TCGTTGGATTTATTCAGGACATTTCCCATTAAGTGATTTATATGAATCATTAACTTTCTTTTCATGGGGTTTCTCCCTTA  
TTCATATGGTTTCCTAT-----TTAAAATTTAAA---AAGCGCAAAAATAAT---  
TTAAGTGCAATAACCGCACCAAGTGCTATTTTTACCCAAGGCTTTGCCACTTCGGGTCTTTTAACCAAAATGCATCAATC  
TGCAATATTAGCACCTGCTCTCCAATCCCAGTGGTTAATGATGCACGTAAGTATGATGGTATTAGGCTATGCAGCTCTTT  
TATGTGGATCATTATTATCAGTAGCTCTTCTAGTCATTACATTTTCGAAAGGCC---ATAAAGATTATTGGT-----  
GAAAACAATAATTTT-----TCATTTTCGTTTGGGAAAATCCAATACATGAAT-----  
GAAAGA-----AGCAATGTTTTA-----CTA-----AACACTTAT-----TTTCTT-----  
-

TCTTCTAAAAATTATTACAGATATCAATTGACTCAACAATTGGATCGTTGGAGTTATCGTATTATTAGTCTCGGGTTTAT  
CTTTTTAACCATAGGAATTCCTTTTCGGGAGCCGATGGGCTAATGAGGCGTGGGGATCATATTGGAATTGGGACCCCAAGG  
AAACTTGGGCGTTTATTACTTGGACCGTATTCGCGATTTATTTCCATACCCGAACA-----  
AATACAAATTTGGAAGGT-----  
GTAAATCCGCACTTGTGGCTTCTATGGGATTTCTTATAATTTGGATATGCTATTTTGGGGTCAATCTATTAGGAATAGG  
TTTACATAGTTATGGTTCATTT-----ACATTAAT-----  
-----ATG---GCAAAAAAG-----

-----AAAGCATTCACTCCCCTTCTA-----TATCTTGCATCTATAGTATTT-----  
TTGCCCTGGTGGATCTCTCTCTCATT-----  
AATAAAAGTCTGAAATCTTGGATTACTAATTGGTGGGATACTAGGCAATCCGAAACTTTTTTGAATGATATTCAAGAAAA  
GAGTATTCTAGAACAATTCATAGAAGTAGAGGAACCTTCTCTGTTG-----  
GACGAAATGATAAAAGAA---

TACCCGGAAACACATCTACAAAAGCTTCGTATAGGAATCCAAAAAGAAACGATCCAATTGATCAAGCTGCACAATGAGGA  
TCATATCCATACGATTTTGCACCTTCTCGACCAATCTAATCTGTTTCGTTATTCTAAGTGGTTATTCTATTTTGGGGAATG  
AAGAACTTCTTATTCTTAACTCTTGGGTTCAAGAATTCCTATATAATTTAAGCGACACAATAAAAGCTTTTTCTATTCTT  
TTATTAACAGATTTATGTATAGGATTTCAATTCGCCCCACGGTGGGAACTAATGATTGGCTCTATATACAAAGATTTTGG  
ATTTGCTCATAATGATCAA-----  
ATTATATCTGGTCTTGTTTCTACTTTTTCCAGTCATTCTAGATACAATTTTTAAATATTGGATCTTTCGTTATTTAAATCG  
TGTATCTCCGTCACTTGTAGTTATTTATCATTCAATGAATGAC-----  
ATGCCTATTGGTGTTCAAAAGTTCCTTTTCGAAATCCG-----

-----GGAGAGGAAGAT-----  
--GCAGTTTGGGTTGACGTAATCAACCGACTTTATCGAGAAAGATTACTT---  
TTTTTAGGCCAAGAGGTTGATAGCGAGATCTCGAATCAAC

Helianthus  
TGTTAATGAACAAGACGTTCTTTTTATTTGTTGACAATATCTTCCGTTTTGTCCAAGCAGGATCTGAAGTATCCGCCTTGT  
TGGGTAGAATGCCTTCCGCTGTGGGTTATCAACCTACCCTTAGTACCAGAAATGGGTTCTTTACAAGAAAGAATTACTTCT  
ACCAAAGAAGGGTCCATAAATTCTATTCAAGCTGTTTATGTACCTGCAGATGATTTGACCGACCCTGCTCCTGCTACGAC  
ATTTGCACATTTAGATGCTACGACCGTATTATCAAGAGGATTGGCTGCCAAAGGTATCTATCCAGCAGTAGATCCTTTAG  
ATTC AACGTCAACTATGCTACAACCCCGGATCGTTGGTGACGAACATTATGAAACTGCACAACAGGTTAAGCAAACCTTTA  
CAACGTTACAAAGAACTTCAAGATATTATAGCTATTCTTGGATTAGACGAATTATCCGAAGAAGATCGTTTAACCGTAGC  
AAGAGCGCGAAAAATTGAGCGTTTCTTATCACAACCTTTTTTCGTAGCAGAAGTATTTACGGGTTCTCCGGGAAAAATATG  
TTGGTTTAGCAGAAACAATTAGAGGCTTTCAATTAATCCTTTCCGGAGAATTAGATGGTCTTCCCGAACAGGCCTTTTAT  
TTGGTAGGTAACATCGATGAAGCTACGGCGAAGGCTATGAACCTTAGAA-----ATGGAG---  
AGCAATTCGAAGAAATGAATGACCTTAAATCTTTGTGTACTGACCCCTAATCGAATAGTTTGGGATTGAGAAGTGAAGA  
AATCATTTTATCTACTAATAGTGGACAAATTGGCGTATTACCAAATCACGCTCCTATTGCCACAGCAGTAGATATAGGTA  
TTTTGAGAATACGC---CTT-----  
AACGACCAATGGCTAACGATGGCTCTGATGGGCGGTTTTGCTAGAATAGGTAATAATGAAATCACTGTTTTAGTAAATGA  
TGCAGAGAAAAGTAGTGACATTGATCCACAAGAAGCTCAGCAAACTCTTGAAATAGCAGAAGCTGCTTTGAGAAAAGCTG  
AAGGAAAGAGACAAACAATCGAGGCAAATCTAGCTCTCCGACGGGCTAGGACACGAGTAGAGGCTATCAATGCCATTTCA  
TAA-----ATGAAAAATGTAACCGATTCTTTCGTTTCT---TTG---  
GGCCACTGGCCATCCGCCGGGAGTTTCGGGTTT---

AATACCGATATTTTAGCAACAAATCTAATAAATCTAAGTGTAGTACTTGGGGTCTTGATCTTTTTTGGAAAGGGAGTG--  
-----  
TTAAGTGATTTATTAGATAATCGAAAACAGAGAATCTTGAATACTATTAGAAATTCAGAAGAATTGCGCGAAGGGGCCAT  
CGAACAGCTGGAAAAGCCCGGGCTCGATTACGGAAAATAGAAATAGAAGCAGATGAGTTTCGCGTGAATGGATACTCTG  
AGATAGAGCGAGAAAAATTGAATTTGATTGATTCAACTTATAAGACTTTGGAACAACCTAGAAAATTACAAAAATGAACT

ATAAATTTTGAACAACAAAAGGCCAGTAATCAAGTCCGACAACGGGTTTTCCAACAAGCTTTACAAGGAGCTCTAGGAAC  
TCTGAATAGTTGTTTA-----  
AACAAACGAATTACATTTACGTACTATCAGTGCCAATATTGGCATATTGGCGGCGATGAAA-----CAAATA---  
ACGGACTAGATGAATCCACTGATTTCTGCCGCTTCCGTTATTGCTGCTGGATTGGCTGTAGGGCTTGCTTCTATTGGACC  
TGGAGTTGGTCAAGGTACTGCTGCGGGCCAAGCTGTAGAAGGTATCGCGAGACAGCCCGAGGCGGAGGGAAAAATACGAG  
GTACTTTATTGCTTAGTCTAGCTTTTATGGAAGCTTTAAACAATTTATGGCCTGGTTGTAGCATTAGCACTTTTATTGCT  
AATCCTTTTGTAAATGAATGTTCTA-----TCATGTTCCATCAACACACTA---AAT---GGGTTA---  
TACGATCTATCCGGTGTGGAAGTAGGCCAACATTTTATTGGAAAATCGGGGGTTTTCCAAGTCCACGGCCAAGTACTTAT  
TACTTCTTGGGTTGTAATTGCTATCTTATTAGGTTCCAGCCGCTCTAGCCGTT---  
CGGAACCCACAACCAATTCCGACCGGCGGTGAGAATTTCTTCGAATATGTTCTTGAATTTATTTCGAGATGTGAGTAAAC  
TCAAATTGGA---  
GAAGAATATGGTCCTTGGGTTCCTTTTATTGGAACATGTTTCTATTTATTTTTGTTTCTAATTGGTCAGGCGCCCTTTT  
ACCTTGGAAAATCATACAATTACCTCATGGGGAGTTAGCCGCACCCACGAATGATATAAAATACTACTGTTGCTTTGGCTT  
TACTCACGTCAGTGGCATATTTCTATGCAGGTTTACCAAAAAGGATTGAGTTATTTTCGGGAAATATATTCAACCAACT  
CCAATTCTTTTACCTATTAATATCTTAGAAGATTTACAAAGCCCCTATCACTTAGTTTTCGACTTTTCGGAAATATATT  
AGCCGATGAATTAGTAGTTGTTGTTCTTGTGTTCTTTAGTACCTTCAGTGGTTTCTATCCCCGTCATGTTCCCTTGGATTAT  
TTACAAGTGGTATTCAAGCTCTTATTTTTGCAACTTTAGCCGCGGCTTATATAGGTGAATCCATGGAGGGCCACCATTGA  
---  
ATGATATTTTCAACTTTAGAGCATATATTAACTCATATTTCTTTTTCTATTGTTTCAATTGTAATCACACTTCATTTGAT  
AACC-----TTATTG---GGC-----  
AATGAAATCATAAAACCATATGATTCGTCAGAAAAGGGGATGATAGCTACTTTTTTATGTCTAACAGGATTATTAACCAC  
TCGTTGGATTTATTACAGGCCATTTCCCGCTAAGTGATTTATATGAATCATTAAATTTTTCTTTCATGGAGTTTCTCCCTTA  
TTCATATAGTGCCTTAT-----TTCAA---ATAAGAAAAAATGAT---  
TTAACCACAATAACTGCCTCAATTACTATTTTTACCCAAGGCTTTGCTACTTCGGGTCTTTTAAATGAAATACACAAACC  
CACAATATTAGTACCTGCTCTACAATCGGAGTGGTTAATAATGCACGTAAGTATGATGATATTGAGCTATGCGGCTCTTC  
TTTGTGGATCATTATTATCAGTAGCACTTCTAGTCACTTACATTTAGAAATATT---TTTTATAGTTCTAAA-----  
AGTAATAATTTATTAATA-----TTA---AATGAGTCGTTTTCAATTTGGTGAATCCAATACAAGAAT-----  
GAAAGA-----AACAATATTTTT-----CAA-----AAAATCTT-----TTTTTT-----  
-  
TCTGATAAGAATTATTACAAGGCCCAATTTATTCAACAATTGGATTATTGGAGTTATCGTGTGATTAGCCTAGGATTTAT  
CTTTTTAACCATAGGTATTCTTTTCAGGAGCAGTATGGGCTAATGAAGCATGGGGATCATATTGGAGTTGGGATCCAAAAG  
AAACTTGGGCCTTTATTACTTGGATCGTATTCGCAATTTATTTGCATACTCGAACA-----  
AATAAAAATTTGCAAGGA-----  
GCAAATTCGCAATTGTGGCGACTCTAGGCTTTCTTATCATTGGATATGCTATTTTGGGGTCAATCTATTAGGAATAGG  
GCTACATAGTTATGGTTCATTACGTTAACCTATAGTTAA-----  
-----ATG---GCAAAAAAG-----  
-----AAAGCATTCACTCCTCTTTTA-----TATCTTGTATCTATCGTATTT-----  
TTGCCCTGGTGGATTTCTCTCTTATTT-----  
CAAAAAAGTCTGGAATCGTGGGTTACTAATTGGTGGAAATACTAGGCAATCCGAAACTTTTTTGAATGATATTGAAGAAAA  
GAGTATTCTAGAAAAATTATAGAAATTAGAGGAACTCCTCTTCTTA-----  
GAGGAAATGATCAAGGAA---  
TACTCGGAGACACATCTACAAAACCTTCGTATAGGAATTCACAAAGAAACAATCCAATTAATCAAGATACAAAACGAGGG  
TCGTATTCATACGATTTTGCACCTTCTCGACAAATATAATCTGTTTCATTATTCTAAGTGGTTATTCTATTTTGGGTAATA  
AAGAACTTGTATTCTTAACTCTTGGGCCCAGGAATTCCTATATACTTAAAGTACACAATAAAAGCTTTTTCTCTTCTT  
TTATTAACTGATTTATGTATCGGATTTCAATTCGCCCCATGGTTGGGAATTGATGATTGGCTTTGTCTACAAGGATTTGG  
ATTTGTTTATAATGATCAA-----  
ATTATATCTGGCCTTGTTCCTACTTTTCCAGTCACTTCTAGATACAATTTTAAATATTGGATTTTCCGTTATTTAAATCG  
TGTATCTCCGTCCTTGTAGTATTTATCATTCAATGAATGACTGA-----  
ATGCCTATTGGTGTTCAAAAGTACCTTTTTCGAAGTCCT-----  
-----GGAGAGGAAGAT-----  
--GCATCTTGGGTTGACATATAACAACCGACTTTATCGAGAAAGATTACTT---  
TTTTTAGGGCAAGAGGTTGATAGTGAGATCTCAAATCAAC  
Illicium  
TGTTAATGAACAAGACGTACTTCTATTTATCGACAATATCTCCCGCTTCGTCCAAGCAGGATCAGAAGTATCTGCCTTAT  
TAGGTAGAATGCCTTCTGCCGTGGGTTATCAGCCTACCCTTAGTACAGAAATGGGTTCTTTGCAAGAAAGAATTACTTCT  
ACCAAAGAGGGATCTATAACTTCCATTCAAGCAGTTTATGTACCTGCAGATGATTTGACCGACCCTGCTCCTGCCACGAC  
ATTTGCACATTTAGATGCTACTACCGTACTATCAAGAGGGTTAGCTGCCAAAGGTATCTATCCAGCAGTGGATCCTTTGG

GTTCAACGTCAACTATGCTCCAACCTAGGATTGTTGGTGAGAAGCATTATGAAACTGCACAAAGAGTTAAGCAAACCTTCA  
CAGCGTTACAAAGAACTTCAGGACATTATAGCTATTCTTGGGTTGGACGAATTATCCGAAGAGGATCGTTTTAACCGTAGC  
AAGAGCACGAAAAATTGAGCGTTTCTTATCACAACCTTCTTCGTAGCAGAAGTATTTACTGGTTCTCCAGGGAAATATG  
TTGGTCTCGCAGAAACAATTAGGGGGTTTTCAACTGATCCTTCCGGAGAATTAGATGGTCTTCCCGAACAGGCCTTTTAT  
TTGGTAGGTAACATCGATGAAGCTACCGCGAAGGCTATGAACTTAGAA-----GTGGAG---AGCAAATTGAAGAAA--  
-  
ATGACTTTAAATCTTTGTGTACTGACTCCTAATCGAATTATTTGGGATTCAGAAGTGAAAGAAATCATTTTATCCACTAA  
TAGTGGCCAAATTGGCGTATTACCCAACCACTCTCCTATTGCAACAGCTGTGGATATAGGTATTTTGAGAATACGC---  
CTC-----  
AACGACCAATGGTTAACGATGGCTCTTATGGGCGGTTTCGCGAGAATAGGCAATAATGAGATAACCATTTTGTAAATGA  
TGCGGAGAAGGGTAGTGACATTGATCCGCGAGAAGCTCAGCGAACTCTTGAAATAGCTGAAGCTAACCTGAGTAGAGCTG  
AAGGCAAGAGACAAGCAATTGAGGCGAATCTAGCTCTCAGACGAGCTAGGACACGAGTCGAGGCTATCAATGCTATTTTCG  
TAC-----ATGAAAAATGTAAACGATTCTTTCGTTTTCT---TTG---  
GGTCACTGGCCATTTCGCCGGGAGTTTCGGGTTT---  
AATACCGATATTTTAGCAACAAATCCAATAAATCTAAGTGTAGTGCTTGGTGTATTGATCTTTTTTCGGAAAGGGAGTG--  
-----  
TTAAATGATTTATTAGATAATCGAAAACAAAGGATTTTAAAGTACTATTTCGCAATTTCGGAAGAACTACGCGGAGGAGCCAT  
TGAGCAGCTCGAAAAAGCCTGGGCTCGCTTACGGAAAGTAGAAATGGAAGCAGATGAGTTTCGAGTGAATGGATACTCGG  
AGATAGAACGAGAAAAAATGAATTTGATTATTGCCACTAATGAAAATTTGGAACGATTAGAAAATTACAAAAATGAAACC  
ATTCATTTTGAACAACAAAGAGCGATTAATCAGGTCCGGCAACGAGTTTTCCAACAAGCCTTACAAGGAGCTCTAGGAAC  
TTTGAAGTTGTTTTG-----  
AACAGCGAGTTGCATTTACGCACCATCAGTGATAATATTGGCAGCTCGGGGACATGAATATGAAAGAAATA---  
ACTGAT---  
ATGAATCCCCTAATTTCTGCCGCTTCCGTTATTGCTGCTGGATTGGCCGTAGGACTTGCTTCTATTGGACCCGGAGTTGG  
TCAAGGTACTGCTGCGGGCCAAGCCGTAGAAGGTATCGCAAGACAACCAGAAGCAGAAGGTAATAATACGCGGTACTTTAT  
TACTTAGTCTGGCTTTTATGGAAGCTTTAACAATTTACGGACTGGTTCGTGGCGTTAGCGCTTTTATTTGCGAATCCTTTT  
GTT---ATGAACGTTCTA-----CCATGTTCCATCAACACACTA---AAA---GGGTTA---  
TACGAGATATCCGGTGTGCAAGTAGGCCAACATTTCTATTGGCAAATAGGAGGTTTCCAAGTCCATGCCCAAGTACTTAT  
CACTTCTTGGGTCGTAATTGCTATCTTATTAGGTTTCAGCCGCTATAGCTGTT---  
CGGAATCCACAAACTATTCCAACCGACGGTCAGAATTTCTTCGAATATGTCCTTGAATTCATTTCGAGATTTGAGCAAAAC  
TCAAATTGGA---  
GAAGAATATGGTCTTGGGTTCCCTTTATTGGAACATGTTCCATTTATTTTTGTTTCTAACTGGTTCGGGTGCTCTTTT  
ACCTTGGAAAATTATACAGTTACCTCACGGGGAGTTAGCTGCACCTACGAATGATATAAATACTACTGTTGCTTTAGCTT  
TACCCACGTCAGTGGCGTATTTCTATGCAGGTCTTACAAAAAGGGATTGGGCTATTTTCGGTAAATACATTCAACCAACT  
CCAATACTTTTACCAATTAATATCTTAGAAGATTTACAAAACCATTATCACTTAGTTTTCGACTTTTTCGGGAATATATT  
GGCTGATGAATTGGTCGTTGTTGTTCTTGTTCCTTGTAGTGCCTTCAGTAGTTCCCTATACCTGTCTATGTTCCCTGGATTAT  
TCACAAGCAGTATTCAAGCTCTGATTTTTGCAACTTTAGCCGCGGCTTATATAGGTGAATCCATGGAAGGCCATCAT---  
---  
ATGATATTTGTGATTTTAGAACATATATTAACCTCACATCTCTTTTTCAATCATTGCAATCGTCATTACGACCCATTTGAT  
GACT-----TTATTA---GTC-----  
CACGAAATCGTAGGACTATGTGACTCGTCAGAAAAAGGCATGATAGCTACGTTTTTCTGTATAACAGGATTATTGGTTAC  
TCGTTGGATTTATTCAGGGCATTTCCTTAAATGATTTATATGAATCATTAAATGTTCCCTTTCGTGGAGTTTCTCTCTTA  
TTCTTATGGTTCATAT-----TTAAG---AACCATAAGAATCAT---  
TTCAGCACAATAACCGCGCCAAGTGCTATTTGTACCCAAAGCTTTGCCACTTCGGGGCTTTCAACTGAAATACATCAATC  
CGAAATATTAGTACCTGCTCTACAATCCCATTGGTTAATGATGCACGTAAGTATGATGTTATTGAGCTACGCAGCTCTTT  
TATGTGGATCATTATTATCAATAGCTCTTCTAGTGATTACATTTAGAAAAAAC---ATAGATATGATTGGT-----  
TTTACAAATCATTTA-----TTA---ATCTGGCCATTTTCGTTTGGTGAGATCAAATACTTGAAT-----  
GAAAAA-----AGAAGTCTTTTG-----AAA-----AACACTTCT-----TTTCTT-----  
-  
TTATTTAGAAATTATCACAGGTATCAATTGACTCAGCGATTGGATCATTGGAGTTATCGTGTTCATTGGCCTAGGGTTTAC  
CTTTTCAACTATAGGTATTCTTTTCGGGAGCAGTATGGGCTAATGAGGCATGGGGATCTTATTGGAATTGGGACCCCAAGG  
AAACTTGGGCATTTATTACTTGGACTATATCCGCGATTTATTACATACTAGAACA-----  
AATAAAAGTTTACAAGGT-----  
ATGAATTCGGCAATTGTGGCTTCTATGGGATTTCTTATAATTTGGATCTGCTATTTTCGGAGTCAATCTATTAGGAATAGG  
ATTACATAGTTATGGTTCATTCACA-----  
-----GTG---CCAAAAAGG-----  
-----AAAGCATTGACTCCCTTCCCA-----TATCTTGCATCTATAGTATTT-----

CTGCCATGGGGGATCTCTCTCTCATTT-----  
AATAAAAGTCTTGAATCTTGGGTTATAAATTGGTGGAAATACCAGGCAGTCCGAAACTTTTTTGAATGATATTCAAGAGAA  
GAAAGTTCTAGAAAGATTTCATAGAATTAGAAGAACTGTTCTGTG-----  
GACGAAATGATAAAGGAG---  
TATTTCGGGGACACATATACAAAAGCTTCGTATAGGAATCTACAAAAGAAACGATACAATTGGTTCAGAATGCACAATCAGGA  
TCATATCCATCTCATTTTTGCATTTCTCAACAAATATAATCTGTTTTCACTATTCTAAGTGCTTATTCTATTCTGGGTAATG  
AAGAAGTTGTCATTCTTAATTCTTGGGTTCCAGGAGTTCCTCTATAACTTAAGCGATACAATAAAAGCTTTTTCTATTCTT  
TTATTAAGTGAATTTGTGTATCGGATTCCTCGCCCCATGGTTGGGAACTAATGATTGGTTTGGTCTACCAAAATTTTGG  
ATTTGCTCATAATGAGCAA-----  
GTTATATCCGGTCTCGTTTTCCACTTTTCCAGTCATTATAGATACAATTTTGAAATATTGGATCTTCCTTTTTTTAAATCG  
TGTATCTCCTTCACTTGTAGTGATTTATCATTCAATGAATGAA-----  
ATGCCCATTGGTGTTCAAAAGTACCTTTTCGGAATCCT-----  
-----GGAGAGGAAGGT-----  
--GCAGTTTGGGTTGACGTATACAACCGACTTCATCGAGAAAGATTACTT---  
TTTTTAGGCCAAGGGGTTGATAGCGAAATCTCGAATCAAC  
Jasminum  
TGTTAATGAACAAGACGTACTTCTATTTATCGACAATATCTTCCGTTTCGTACAAGCAGGATCCGAAGTGTCCGCCTTAT  
TGGGTAGAATGCCTTCTGCTGTGCGTTATCAACCTACCCTGAGTACCAGAAATGGGTACTTTACAAGAAAGAATTACTTCT  
ACCAAAGAAGGGTCCATAAATTTCGATCCAAGCAGTTTATGTACCTGCAGACGATTTGACCGACCCTGCTCCTGCTACGAC  
ATTTGCACATTTAGATGCTACTACCCTACTATCAAGAGGATTAGCTGCCAAAGGGATCTATCCAGCAGTAGATCCTTTAG  
ATTC AACGTCAACCATGCTTCAACCCCGGATCGTTGGTGAGGAACATTACAAAATTGCGCAAAGAGTTAAGCAAACCTTTA  
CAACGTTACAAAGAGCTTCCAGGACATTATAGCTATCCTTGGGTTGGACGAATTATCCGAAGAGGATCGTTTAAACCGTAGC  
AAGAGCGCGAAAATTTGAGCGTTTCTTATCACAACCTTTTTTGTAGCAGAAGTATTTACCGGTTCTCCAGGAAAATATG  
TTGGTCTAGCAGAAACCATTAGAGGGTTTCAATTGATCCTTTCCGGAGAATTAGATGGTCTTCCCGAACAGGCCTTTTAT  
TTGGTAGGTAATATCGATGAAGCTACCGCCAAGGCTATGAACTTAGAA-----ATGGAG---  
AGCAATTTGAAGAAATGAATGACTTTTAACTTTTGTGTACTGACCCCAATCGAATTATTTGGGATTTCAGAAGTGAAAGA  
AATCATTATCTACTAATAGTGGTCAAATTTGGCGTATTACCAAATCATGCCCTATTGCTACAGCTGTAGATATAGGGA  
TTTTGAGAATACGC---TTT-----  
AACGCAATGGTTAACGGTGGCTCTAATGGGTGGTTTTTGTAGAAATAGGCAATAATGAGATCACTGTTTTGGTAAATGA  
TGCGGAAAGGGGAGTGACATTTGATCCACAAGAGGCTCAGCAAACCTTTGAAATAGCCGAAGCGAATTTGAGAAAAGCTG  
AAGGAAAGAGACAAAAGAAATTGAGGCAAATCTAGCTCTCCGACGAGCGAGGACAAGACTAGAGGCTGTCAATGTGATTTCC  
TAA-----ATGAAAATGTAACCGATTCTTTCGTTTTCT---TTG---  
GGCCACTGGCCATCTGCCGGGAGTTTCGGATGG---  
AATACCGATATTTTAGCAACAAATCTAATAAATCTAAGTGTAGTAATTGGTGTATTGATCTTTTTTTGGAAAGGGAGTG--  
-----  
TTAAGTGATTTATTAGATAATCGAAAACAAAGGATCTTGAATACTATTTCGTAATTCAGAAGAATTACGTGGGGGGGCCAT  
TGAACAGCTGGAAAAGCCCGGGCTCGCTTACGGAAAATGGAATGGAAGCAGATCAGTTTCGGGTGAATGGATACTCTG  
AGATAGAGCGGAGACAAATGGAATTTGATTAATTTCAACTTCTAAGACTTTGGAACAATTCGAAAATTTCAAAAATGAAACG  
ATTCAGTTTGAACAGCAAAGGGCGATTAATCAAGTCCGACAGCGGGTTTTCCAACAAGCCTTACAAGGAGCTTTAGGAAC  
TCTGAATAGTTGTTTTG-----  
AACAAGGAGTTACATTTACGTACCATTAGTGCTAATATTGGTATATTGGGAGCGATGAAA-----GAAATA---  
ACTGATTAATGAATCCACTGATTTCTGCCGCTTCTGTTATTGCTGCTGGATTGGCCGTAGGGCTTGCTTCTATTGGACC  
TGGAGTTGGTCAAGGGACTGCAGCGGGTCAAGCTGTAGAGGGTATCGCGAGACAGCCCGAGGCAGAGGGGAAAATACGAG  
GTACTCTATTGCTTAGTCTAGCTTTTATGGAAGCTTTAACAATTTATGGATTGGTTGTAGCATTAGCACTTTTATTTGCG  
AATCCTTTTGTAAAATGAATGTGCTA-----TCATGTTCCATCAACACACTA---AAA---GGGTTA---  
TACGATATATCCGGTGTGGAAGTAGGCCAACATTTCTATTGGCAAATAGGGGATTTCCAAGTCCATGGCCAAGTACTTAT  
TACTTCTTGGGTTGTAATTGCTATTTTTATTAGGTTTCAGCTACTCTAGCTGTT---  
CGGAACCCACAAACATTCCGACTGGGGGTGAGAATTTCTTCGAATATGTTCTTGAATTCATTTCGAGATATGAGTAAAC  
TCAAATTGGA---  
GAAGAATATGGCCCTTGGGTTCCTTTTATTGGAACATGTTTCTATTTATTTTTGTTTCGAATTGGTCAGGAGCTCTTTT  
ACCTTGGAAAATCATACAATTGCCTCATGGAGAGTTAGCCGCACCTACGAATGATATAAATACTACCCTTGCTTTGGCTT  
TACTCACGTGAGTGGCATAATTTCTATGCGGGTCTTACCAAAGGGGATTAAGTTATTTTCGGGAAATATATTCAACCAACT  
CCAATCCTTTTACCCATTAACATCTTAGAAGATTTACAAAGCCCTTATCACTTAGTTTTCGGCTTTTTCGGGAATATCTT  
AGCAGATGAATTAGTAGTTGTTGTTCTTGTCTTTAGTACCTTCAGTGGTTCCCTATCCCTGTCATGTTCCCTGGATTAT  
TTACAAGTGGTATTCAAGCTCTTATTTTTGCAACTCTAGCCGCGGCTTATATAGGTGAATCTATGGAGGGCCATCATTGA  
---  
ATGATATTTTCAACCTTAGAACATATATTAACCTCATATTTCTTTTTCGATCGTTTCAATTCTAGTTACAATTCATTTGAT



AACC-----TTTTTA---GTC-----  
GATGAAATCAGAAAACCTCTACGATTCGTTTCGAAAAGGGCATGATATTGGCTTTTTTCTGTATAACAGGATTATTAGTTAT  
TCGTTGGATTTATTTCAGGACATTTTCCACTAAGTAATTTATATGAATCATTAAATGTTCCCTTTCGTGGAGTTTATCCCTTA  
TTCATAGAGTTCGGTAT-----TTCAA---AAAAATCAAAAATTT---  
TTAAGTACAATAATCGGCCCAAGCGCTATTTTTACCCAAGCCTTTGCTACTTCAGGTCTTTTAACTGAAATACACGAATC  
CACAATATTAGTACCCGCTCTTCAATCCGAGTGGTTAATAATGCATGTAAGTATGATGATATTGGGCTATGCAGCCCTTT  
TATGTGGATCCTTATTATCAGTAGCACTTCTAGTCATTGCAGTTAGAAAAAC---AAAAAGTCTTTTTTT-----  
ACAAGTAATCCTTTATTCAAG---TTA---AATGGATCATTTTTTTTTTGGTGAAATCGAATACATGGAT-----  
GAAAGA-----ATAAATGTTTTA-----CAAATACTCCAATACTTCT-----  
TTTTTTTCTACTTTTTTTTCTACAAAGAATTATTACAGATCACAATTTATTCAACAATTAGATTATTGGAGTTATCGGGT  
TATTAGTCTAGGATTTCTCTTTTTAACCATAGGGATCCTTTCTGGAGCAGTATGGGCTAACGAAGCCTGGGGGTCGTATT  
GGAGTTGGGACCCAAAGGAACTTGGGCATTTATTACTTGGATCGTATTCGCGATTTTTTTTACATATTCAACC-----  
-----AATGTAAAATGGAAGGGT-----  
ACGAATCCGCAATTGTGGCGTCTATCGGCTTTCTTATAATTTGGATATGCTATTTTGGAGTCAATCTATTAGGAATAGG  
GCTACATAGTTATGGTTCATTTACATTAACATCTAATTGA-----  
-----ATG---GCAAAAAAG-----  
-----AAAGCATTCACTCCTCTTTTG-----TATTTTGCATCTATAGTCTTT-----  
TTGCCCTGGTGGATTTCTCTCTCATT-----  
ACGAAAAGTATGGAATCTTGGGTTACTAATTGGTGGAAATACTGGGCAATCCGAAATTTTCTTGAATGATATTCAAGAAAA  
GAGTATTCTAGAAAGTTTCATAGAATTAGAGGAAATCCTCCTCTTG-----  
GACGAAATGATCAAGGAA---  
CACTCGGAGACACGATTACAAAAGCTTGGTATAGGAATCCACAAAAGAAACGATCCAATTAATCAAGATACAGAATGAGGA  
TCGTATCCATACGATTTTGCACCTTATCGACAAATATAATCTCTTTTGTATTCTAAGCGGTTATTCCATTTTTGGTAATG  
AAGAAGTTGTTATTCTTAACTCTTTGGCTCAGGAATTCCTATATACTTAAAGCGACACAGTAAAAGCTTTTTCAATTCTT  
TTATTAACGGATTTATGTATCGGATTCATTACCCCGCGGTTGGGAAGTAATGATTGGCTCTGTCTACAAAGATTTTGG  
ATTTGTTTCATAATGATCAA-----  
ATGATATCTGGTCTTGTTCCTACTTTTCCAGTCACTTCTCGATACTCTTTTGAATATTGGATTTTCCGTTATTTAAATCG  
TGTATCTCCGTCACCTGTAGTTATTTATCATTCAATGAATGACTGA-----  
ATGCCCTATAGGTCTTCCAAAAGTACCCTTC-----  
TTCGATTACGAAGACGATTACGATTACAACATGACTACGGCTACGCCGACTACAACCACGACGACTACGCAGAAAAAAA  
AGCCGAAAAGAAAAGCAGAAAAGAAAACAA-----GCC---  
TGGACTGACTTATACAGCAAACCTTTATCACGGTGAATACTT---  
TTTCTAGGCGACGTAATTGATACCGAGCTCGCGAATGAAC  
Lactuca  
TGTTAATGAACAAGATGTACTTTTTATTTATTGACAATATCTTCCGTTTTGTCCAAGCAGGATCTGAAGTATCCGCCTTGT  
TGGGTAGAATGCCTTCCGCTGTGGGTTATCAACCTACCCTTAGTACCGAAATGGGTTCTTTACAAGAAAGAATTACTTCT  
ACCAAAGAAGGGTCCATAACTTCTATTCAAGCTGTTTATGTACCTGCAGATGATTTGACCGACCCTGCTCCTGCTACGAC  
ATTTGCACATTTAGATGCTACTACCGTACTATCAAGGGGATTAGCCGCCAAAGGTATCTATCCAGCAGTAGATCCTTTAG  
ATTCACCGTCAACTATGCTACAACCCCGGATCGTTGGTGAAGAACATTATGACACTGCACAAGAGGTTAAGCAAACCTTTA  
CAACGTTACAAAGAAGCTTCAAGATATTATAGCTATTCTTGGATTGGACGAATTATCCGAAGAGGATCGTTTAAACCGTAGC  
AAGAGCGCGAAAAATTGAGCGTTTTCTTATCACAACCTTTTTTGTAGCAGAAGTATTTACGGGTTCTCCGGGAAAATATG  
TTGGTTTAGCAGAAACAATTAGAGGCTTTCAATTAATCCTTTCCGGAGAATTAGATGGTCTTCCCTGAACAGGCTTTTTAT  
TTGGTAGGTAACATCGATGAAGCTACGGCGAAGGCTATGAACCTAGAA-----ATGGAG---  
AGCAATTTGAAGAAATGAATGACCTTAAATCTTTGTGTACTGACCCCTAATCGAATAGTTTGGGATTGAGAAGTGAAGA  
AATCATTTTATCTACTAATAGTGGACAAATGGCGTATTACCAAATCACGCTCCTATTGCCACATCAGTAGATATAGGTA  
TTTTGAGAATACGC---CTT-----  
AACGACCAATGGCTAACGATGGCTCTGTATGGGCGGTTTTGCTAGAATAGGTAATAATGAGATCACTGTTTTAGTAAATGA  
TGCAGAGAAAAGTGGTGACATTGATCCACAAGAAGCTCAGCAAACCTTGAATAGCGGAAGCTGCTTTGAGAAAAGCTG  
AAGGAAAAGAGACAAACAATTGAGGCAAATCTAGCTCTCCGACGGGCTAGGACACGGGTAGAGGCTATCAATGCGATTTCA  
TAA-----ATGAAAATGTAACCGATTCTTTCGTTTCT---TTG---  
GGCCACTGGCCATCCGCCGGGAGTTTCGGGTTT---  
AATACCGATATTTTAGCAACAAATCTAATAAATCTAAGTGTAGTGCTTGGGGTCTTGATCTTTTTTTGGAAAGGGAGTG--  
-----  
TTAAGTGATTTATTAGATAATCGAAAACAGAGAATCTTGAATACTATTAGAAATTCAGAAGAATTGCGCGAGGGGGCCAT  
CGAACAGCTGGAAAAGCCCGGGCTCGCTTACGGAAAGTAGAAATAGAAGCAGATCAGTTTCGCGTGAATGGATACTCTG  
AGATAGAGCGAGAAAAATTGAATTTGATTGATTCAACTTATAAGACTTTGGAACAACCTAGAAAATTACAAAAATGAACT  
ATAAATTTTGAACAACAAAAGCGAGTAATCAAGTCCGACAACGGTTTTTCCAACAAGCCTTACAAGGAGCTCTAGGAAC

TCTGAATAGTTGTTTA-----  
AACAGCGAGTTACATTTACGTACTATCAGTGCCAATATTGGCATATTGGGGGCGATGAAA-----GAAATA---  
ACGGATTAGATGAATCCACTGATTTCTGCCGCTTCCGTTATTGCTGCTGGATTGGCTGTAGGGCTTGCTTCTATTGGACC  
TGGAGTTGGTCAAGGTACTGCTGCGGGTCAAGCTGTAGAAGGTATCGCGAGACAGCCCGAGGCGGAGGGGAAAAATACGAG  
GTACTTTATTGCTTAGTCTAGCTTTTATGGAAGCTTTAACCATTTATGGCCTGGTTGTAGCATTAGCACTTTTATTTGCG  
AATCCTTTTGTAAATGAATGTTCTA-----TCATGTTCCATCAACACACTA---AAT---GGGTTA---  
TACGATATATCCGGTGTGGAAGTAGGCCAACATTTTATTGGAAAATCGGGGGTTTCCAAGTCCACGGCCAAGTACTTAT  
TACTTCTTGGGTTGTAATTGCTATCTTATTAGCTTCAGCCACTCTAGCCGTT---  
CGGAACCCACAAACCATTCCGACCAGCGGTGAGAATTTCTTCGAATATGTCCTTGAATTTATTCGAGATGTGAGTAAAC  
TCAAATTGGA---  
GAAGAATATGGTCCTTGGGTTCTTTTATTGGAACATGTTTCTATTTATTTTTGTTTCTAATTGGTCAGGCGCCCTTTT  
ACCTTGGAATAACATAAATTACCTCATGGGGAGTTAGCCGCCCCACGAATGATATAAATACTACTGTTGCTTTGGCTT  
TACTCACATCAGTGGCATATTTCTATGCGGGTCTTAGCAAAAAGGATTAGGTTATTTTCGGTAAATATATTCAACCAACT  
CCAATTCTTTTACCTATTAACATCTTAGAAGATTTACAAAAGCCCTATCACTTAGTTTTCGACTTTTCGGAAATATATT  
AGCCGATGAATTAGTAGTTGTTGTTCTTGTCTTTAGTACCTTCAGTGGTTTCTATCCCTGTCATGTTCTTTGGATTAT  
TTACAAGTGGTATTCAAGCTCTTATTTTTGCAACTTTAGCTGCGGCTTATATAGGTGAATCCATGGAGGGCCACCATTGA  
---  
ATGATATTTTCAACTTTAGAGCATATATTCACTCATATTTCTTTTCAATTGTTTCAATTGTAATTATAATTCATTTGAT  
AACC-----TTATTG---GGC-----  
AATGAAATCATAAAACCATATGATTCGTCAGAAAAGGGGATGATAGTTACTTTTTTATGTCTAACAGGATTATTAATCAC  
TCGTTGGATTTATTCGGGCCATTTCCCACTAAGTGATTTATATGAATCATTATTTTTCTTTTCATGGAGTTTCTCCCTTA  
TTCATATAGTCCCTTAT-----TTCAA---ATAAGAAAAAATTAT---  
TTAACCGAAATAACTGCCTCAAGTACTATTTTACCCAGGGCTTTGCTACTTCGGGTCTTTTAACTGAAATACGTAAACC  
CACAATATTAGTACCTGCTCTACAATCGGAGTGGTTAATAATGCATGTAAGTATGATGATATTGAGCTATGCGGCTCTTC  
TTTGTGGATCCTTATTATCAGTAGCACTTCTAGTCACTTACATTTAGAAAAGATT---TTTTATAGTTATAAA-----  
AGTAATAATTTCTTAAAA-----TTA---AATGAGTCTTTTTCAATTTGGTGAATCCAATACAAGAAT-----  
GAAAGA-----AACAAATTTTTA-----AAA-----AAAAATTAC-----TTTTTG-----  
-  
TCTGCTAAGAATTATTACAAGGCCCAATTGATTCAACAATTAGATTATTGGAGTTATCGCGTGATTAGCCTAGGATTTAT  
ATTTTTAACCATAGGTATTCTTTTCAGGAGCAGTATGGGCTAATGAAGCATGGGGATCATATTGGAGTTGGGATCCAAAGG  
AAACTTGGGCCTTTTATTACTTGGATCGTATTTGCAATTTATTTGCATATTCGAACA-----  
AATAAAAATTTTCAGGGG-----  
GCAAATTCGCAATTGTGGCGACTCTAGGCTTTCTTATAATTTGGATATGCTATTTTGGGGTAAATCTATTAGGAATAGG  
GCTACATAGTTATGGTTCATTTACGTTAACCTCTAGTTAA-----  
-----ATG---GAAAAAAG-----  
-----AAAGCATTCACTCCTCTTTTA-----TATCTTGCATCTATAATATTT-----  
TTGCCCTGGTGGATTTCTCTCTCATT-----  
CAAAAAGTATGGAATCCTGGGTTACTAATTGGTGGAAATACTAGGCAATCCGAACCTTTTTTGAATGATATTGAAGAAAA  
GAGTATTCTAGAAAATTCATAGAATTAGAGGAACCTCTCTCTTA-----  
GAGGAAATGATTAAGGAA---  
TACTCGGAGACACATCTACAAAACCTTCGTATAGGAATTCACAAAAGAAACAATCCAATTAATCAAGATACACAACGAGGG  
TCGTATTCATACGATTTTGCACCTTCTCGACAAATATAATCTGTTTCATTATTCTAAGTGGTTATTCTCTTTTGGGTAATA  
AAGAACTTGTATTCTTAACTCTTGGGTTTCAGGAATTCCTATATAACTTAAAGTACACAATAAAAGCTTTTTCTCTTCTT  
TTATTAACTGATTTATGTATCGGATTTCAATTCGCCCCATGGTTGGGAACTGATGATTGGCTTTGTCTACAAGGATTTTGG  
ATTTGTTTCATAATGAGCAA-----  
ATTATATCTGGCCTTGTTCCTACTTTTCCAGTCACTTCTAGATACAATTTTCAAATATTGGATTTTCCGTTATTTAAATCG  
CGTATCTCCGTCACCTGTAGTGATTTATCATTCAATGAATGACTGA-----  
ATGCCTATTGGTGTTCAAAAGTACCTTTTCGAAGTCCT-----  
-----GGAGAGGAAGAT-----  
--GCATCTTGGGTTGACATATAACAACCGACTTTATCGAGAAAGATTACTT---  
TTTTTAGGTCAAGAGGTTGATAGCGAGATCTCGAATCAAC

Liriodendron

TGTTAATGAACAAGACGTACTTCTATTTATAGACAATATCTTCCGTTTCGTCCAAGCAGGATCAGAAGTATCCGCCTTAT  
TAGGTAGAATGCCTTCTGCTGTGGGTTATCAACCTACCCTTAGTACAGAAATGGGTTCTTTGCAAGAAAGAATTACTTCT  
ACCAAAGAGGGATCTATAACTTCCATTCAAGCAGTTTATGTACCTGCGGACGATTTGACCGACCCCGCTCCTGCTACGAC  
ATTTGCACATTTAGATGCTACTACCGTACTCTCAAGAGGATTAGCTGCTAAAGGTATCTATCCAGCAGTAGATCCTTTAG  
ATTC AACGTCCACTATGCTCCAACCTAGGATCGTTGGCGAGGAACATTATGAACTGCACAAAAGAGTTAAGCAAACCTTCA

CAACGTTACAAAGAACTTCAGGATATTATAGCTATCCTTGGGTTGGACGAATTATCTGAAGAGGATCGTTTAAACCGTAGC  
AAGAGCACGAAAAATTGAGCGTTTCTTATCACAACCCTTCTTCGTAGCAGAAGTATTTACTGGTTCTCCAGGAAAAATATG  
TTGGTCTCGCAGAAACCATTAGGGGGTTTTCAACTGATCCTTTCCGGAGAATTAGATGGTCTTCCCAGCAGGCCTTTTAT  
TTGGTAGGTAACATCGATGAAGCTACCGCGAAGGCTATGAACTTAGAA-----GTGGAG---AGCAAATTGAAGAAA--  
-  
ATGACTTTAAATCTTTGTGTAAGTACCCTAATCGAATTATTTGGGATTGAGAAGTGAAGAAATTATTTTATCTACTAA  
TAGTGGCCAAATTGGCGTATTACCAAATCACGCCCTATTGCCACAGCCGTAGATATAGGTATTTTGGAGGTACGC---  
CTC-----  
AACGACCAATGGTTAACGATGGCTCTGATGGGTGGTTTTCGCTAGAATAGGTAATAATGAGATCACCATTTTGTAAATGA  
TGCGGAGAAGGGTAGTGACATTGATCCACAAGAAGCTCAGCGAACTCTTGAAATAGCTGAAGCTAACTTGAGTAGAGCTG  
AAGGCAAGAGACAAGCAATTGAGGCGAATCTAGCTCTCAGACGAGCTAGGACACGAGTAGAGGCTATCAATGTTATTTTCG  
-----ATGAAAAATGTAACCGATTCTTTTCGTTTTCC---TTG---  
GGTTACTGGCCATCCGCCGGGAGTTTTCGGGTTTT---  
AATACCGATATTTTAGCAACAAATCTAATAAATCTAAGTGTAGTACTTGGTGTATTGATCTTTTTTGGAAAGGGAGTG--  
-----  
TTAAGTGATTTATTAGATAATCGAAAACAGAGGATCCTGAGTACTATTGCAAATTCAGAAGAAGTACGTGAAGGAGCTAT  
TGAGCAGCTCGAAAAAGCCCGGGCTCGCTTACGGAAAGTGGAAATGGAAGCGGATGAGTTTTCGAGTGAATGGATACTCTG  
AGATAGAACGAGAAAAACAGAATTTGATTAATGCCACTTATGAGAATTTGGAACGATTAGAAAATTACAAAAATGAAACC  
ATTCATTTTGAAGAACAAGAGCAATTAATCAGGTCCGACAGCGAGTTTTCCAACAAGCCTTACAGGGAGCTCTAGGAAC  
TCTGAATAGTTGTTTCG-----  
AACAGCGAGTTACATTTACGCACCATCAGTGCTAATATTGGCGTGCTCGGGGCCATGAAA-----GAAATA---  
ACTGAT---  
ATGAATCCACTGATTTCTGCCGCTTCCGTTATTGCTGCTGGATTGGCCGTAGGGCTTGCTTCTATTGGACCTGGAGTTGG  
TCAAGGTACTGCTGCGGGCCAAGCCGTAGAAGGTATCGCGAGACAACCAGAAGCAGAGGGTAAAATACGAGGTACTTTAT  
TGCTTAGTCTGGCTTTTATGGAAGCTTTAACAATTTACGGACTGGTCTGGCATTAGCGCTTTTATTTGCGAATCCTTTT  
GTT---ATGAATGTTCTA-----CCATGTTCCATCAACACACTA---AAG---GGGTTA---  
TACGATATATCCGGTGTGGAAGTAGGCCAACATTTCTATTGGCAAATAGGGGGTTTTCCAAGTCCATGCCCAAGTACTTAT  
CACTTCTTGGGTCTGAATTGCTATCTTATTAGGTTTCAGCCACTATAGCTGTT---  
CGGAATCCACAACCAATTTCCAACCGACGGTCAGAATTTCTTCGAATATGTCCTTGAATTCATTTCGAGACTTGAGCAAAAC  
CCAGATTGGA---  
GAAGAATATGGCCCTTGGGTTCCCTTTATTGGAACATGTTCCATTTATTTTTGTTTTCTAACTGGTCAGGTGCTCTTTT  
ACCTCGGAAAAATCATAACAGTTACCTCATGGGGAGTTAGCTGCACCGACGAATGATATAAATACTACTGTTGCTTTAGCTT  
TACCCACGTCAATGGCATATTTCTATGCGGGTTTTACCAAAAAGGATTGAGTTATTTTCGGTAAATACATTCAACCAACC  
CCAATACTTTTACCAATTAACATCCTAGAAGATTTTACAAAACCTTTATCACTTAGTTTTCGACTTTTTCGGGAATATATT  
GGCTGATGAATTAGTAGTTGTTGTTCTTGTCTTTAGTACCTTCAGTAGTCCCTATACCTGTCTATGTTCCCTTGGATTAT  
TCACAAGCGGGATTCAAGCTCTTATTTTTGCAACTTTAGCCGCGGCTTATATAGGTGAATCTATGGAGGGTCTATCAT---  
---  
ATGATATTTGCGACTTTAGAACATATATTAACCTCACATCTCTTTTTTCGATCATTTC AATTGTCATTACGATTCAATTTGGT  
GACT-----TTATTA---GTC-----  
CATGAAATCGTAGGACTATGTGATCCGTCCGAAAAAGGCATGATAGCCGCTTTTTTCTGTATAACAGGATTATTAGTTAC  
TCGTTGGATTTATTCGAGACATTTCCCCTTAAGTGATTTATATGAATCATTAAATGTTCCCTTTCATGGAGTTTCTCCATTA  
TTCATATGGTTCCTAAA-----ATATGG---AATCATAAAAATGAT---  
TTAAGCGCAATAACCGCGCCAAGCGCTATTTTTACCCAAGGCTTTGCCACTTCGGGTCTTTCAACTGAAATGCATCAATC  
CGCAATATTAGTGCCTGCTCTACAATCCCAGTGGTTAATGATGCATGTAAGTATGATGTTATTGAGCTATGCAGCTCTTT  
TATGTGGATCGTTATTATCAGTAGCTCTTTTAGTCATTACATTTGCAAAAAAC---ATAGGTATTGTTGGC-----  
AAAAGCAATCATTTA-----CTA---ATTGGGTCATTTTCCTTTGATGAGATCCACTACTTGAAT-----  
GAAAAA-----AGAAATGTTTTA-----CAA-----AACACTTCT-----TTTCTT-----  
-  
TCATTTAGAAATTATCACAGGTATCAATTGACTCAGCGATTGGATTATTGGAGTTATCGTGTCTATTAGTCTAGGGTTTAC  
CTTTTTAACCATAGGTATTCTTTTCGGGAGCAGTATGGGCTAATGAGGCATGGGGATCTTATTGGAATTGGGACCCCAAGG  
AAACTTGGGCATTTATTACTTGGACCATATTTGCGATTTATTTACATACTAGAACA-----  
AATCGGAGTTTGAAGGT-----  
GTGAACTCGGCAATTGTGGCTTCCATGGGATTTCTTATAATTTGGATATGCTATTTTGGGGTCAATCTATTAGGAATAGG  
ACTACATAGTTATGGTTCATTACATTAACATCTAAT-----  
-----AAAGTG---CCAAAAAG-----  
-----AAAGCATTGACTCCCCTCCA-----TATCTTGCATCTATAGTCTTT-----  
TTGCCCTGGTGGATCTCTATCTCATT-----

AATAAAAGTCTGGAACCTTGGGTTACTAATTGGTGAATACCAGGCAATCCGAACTTTTTTGAATGATATTCAAGAGAA  
GAACGTTCTAGAAAAGATTTCATAGAATTAGAACAACCTATTCTGTTG-----  
GACGAAATGATAAAGGAG---  
TACCCGGGGACACAGATACAAAAGCTTCGTATAGGAATCCACAAAAGAAACAATACAATTGGTCAAAATGCACAATGAAGA  
TCATATCCATATCATTTCGATTTCTCGACAAAATAATCTGTTTTGCTATTCTAAGTGGTTATTCTATTCTGGGTAATG  
AAGAAGTTGTCATTCTTAATTCTTGGGTTCCAGGAATTCCTCTATAACTTAAGCGACACAATAAAAGCTTTTTCTATTCTT  
TTATTAAGTATTATGTATCGGATTCCACTCGCCCCATGGTTGGGAAGTAAATGATTGGTTCGGTCTACAAAAGATTTGG  
ATTTGCTCATAACGATCAA-----  
ATTATATCTGGTCTTGTTCCTTTCCAGTCACTTCTAGATACAATTTTGAAATATTGGATCTTCCATTATTTAAATCG  
TGTATCTCCTTCACTTGTAGTGGTTTATCATTCAATGAATGAA-----  
ATGCCCATTGGTGTTCAAAAGTACCTTTTCGGAGTCT-----  
-----GGAGAGGAAGAT-----  
--GCAATTTGGGTTGACGTA---

Lotus

AACCGACTTTATCGAGAAAGATTACTTTTTTTTTTAGGCCAAGAGGTTGATAGCGAGATCTCGAATCAAC  
TGTGAATGAACAAGACGTACTTCTATTTATCGACAATATCTTCCGTTTCGTCCAAGCAGGATCCGAAGTATCCGCTTTAT  
TAGGTGCAATGCCTTCCGCTGTGGGTTATCAACCTACCCTTAGTACCGAAATGGGTTCTTTACAAGAAAGAATTACTTCT  
ACCAAAGAAGGGTCCATAACTTCTATTCAAGCAGTTTATGTACCCGCAGACGATTTGACTGATCCCGCCCCGCCACGAC  
ATTTGCACATTTAGATGCTACTACTGTACTATCAAGAGGATTAGCTGCCAAAGGTATCTATCCAGCAGTAGATCCTTTAG  
ATTCACGTCAACTATGCTCCAACCCCGAATCGTTGGTGAAGAACATTACGAAACTGCGCAAAGAGTTAAACAAACTTTA  
CAACGTTACAAAAGAACTTCAAGATATTATAGCTATCCTTGGGTTGGATGAATTATCTGAAGAGGACCGTTTGACCGTAGC  
AAGAGCACGAAAATGAGCGTTTCTTATCACAACCTTTTTTGTAGCAGAAGTATTTACCGGTTCCCGGGGAAATATG  
TTGGTCTAGCAGAAAACAATTAGAGGGTTTAAATTGATTCTTTCTGGTGAATTAGATAGTCTTCCCGAACAAGCCTTTTAT  
TTGGTGGGTAATATCGATGAAGCTACCGTGAAGGCTACGAATTTAGAA-----AAGGAG---AGCAAATTTGAAGAAA--  
-

ATGACTTTAAATCTTTGTGTACTGACCCCAAATCGAATTGTTTGGGATTCCGACGTGAAGGAAATTATTTTATCTACAAA  
TAGTGGACAAGTTGGAATATTACCCAATCACGCGCCTCTGGCTATGGCTTTAGATATAGGTATTTTGAGAATACGC---  
CTT-----  
AACGACCAATGGTTAACTATGGCTCTGATGGGCGGTTTTGCTCGAATAGGCAATAATGAAATCACTGTTTTAGTAAATGA  
TGCGGAAAAGGAAGTGACATTGATCCACAAGAAGCACAGCAAACCTTTGAAATAGCAGAAGCTAATTTAAAGGAGGCTA  
AGGGCAAGAGACAAAACAATTGAGGCAAATCTAGCTCTCAGACGAGCTAGAACACGAGTAGAGTCTATCAATATGATTTCA  
-----ATGAAAATATAACCGATCCTTTCCCTTGC---TTG---  
GGTACTGGCCATCTGCCGGAAGTTTCGGATTT---

AATACCGATATTTTAGCAACAAATCCAATAAATCTAAGTATAGTGATAGGTGTATTGATTTTTTTTTGGAAAGGGAGTG--  
-----  
TTAAGTGATTTATTAGATAATCGAAAACAGAGAATCTTGAGAACTATTCGAAATTCAGAAGAAGTACGGGAAGGGGCGAT  
TGAACAGCTGGAAAAGCCAGGCCCGCTTAAAGAAAGTAGAAAACAGAAGCAGATCGGTTTAGAGTGAATGGCTACTCTG  
AGATAGAACGAGAAAAATTGAATTTAATTAATTTCAATTTATACAACCTTTAGAACAATTAGAAAATTACAAAAATGAAACC  
ATTCATTTTGAACAACAAGGGCGATTAATCAAGTCCGACAGCGGGTTTTACAACAAGCCTTACAAGGAGCTCTAGGAAC  
TCTGAATAGTTGCTTA-----

AATAATGAGTTACATTTCCGTACCATCGCCGCTAATATTGGTATGTTGGGGCGATGAAA-----GAAAAA---  
AATAAT---  
ATGAATCCAATAATTTCTGCCGCTTCCGTTATTGCTGCTGGGTTGGCCGTTGGGCTTGCTTCTATTGGACCTGGGGTTGG  
TCAAGGCACTGCTGCAGGTCAAGCTGTAGAAGGAATTGCGCGACAACCAGAGGCAGAGGGAAAAATACGAGGTACTTTAT  
TACTTAGTCTGGCTTTTATGGAAGCTTTAACTATTTATGGGCTGGTTGTAGCATTAGCACTTTTATTTGCAAATCCCTTT  
GTT---ATGAATGTTCTA-----CTATGTTCCATCAACACATTC---AAA---AGATTA---  
TACGATATTTCTGCCGTGGAAGTAGGTCAACATTTCTACTGGCAAATGGGAGATTTCCAAGTGCATGCCCAAGTACTTAT  
TACTTCGTGGGTTGTGATTGCTATCTTATTAGGTTCAACCATTCTAGTTGTT---  
CGAAATCCACAACCAATTTCCCAATTTTGGTCAAAATTTCTTTGAATATGTCCTTGAATTTATTTCGAGACGTAAGCAAAAC  
TCAAATTTGGA---

GAAGAATATGGTCTTGGGTTCCATTTATCGGAACTCTATTTCTATTTATTTTTGTTTCGAATTTGGTTCAGGGGCTCTTTT  
GCCTTGGAAAATCATAACAGTTACCTCATGGGGAGTTAGCTGCACCCACAAATGATATAAATACTACTGTTGCATTAGCTT  
TACTTACGTCAGTAGCATATTTCTATGCGGGGATTTCAAAAAAAGGATTAGCTTATTTTGGTAAATATATACAACCTACT  
CCAATTTCTTTTACCGATTAACATCTTAGAGGATTTTACAAAACCTTTATCGCTTAGTTTTCGACTTTTCGGAAATATATT  
AGCTGACGAATTAGTAGTAGTTGTTCTTGTCTTTAGTACCTTTAGTGGTTCCCTATACCTGTTATGTTCTTTGGATTAT  
TTACAAGTGGTATTCAAGCTCTTATTTTTGCTACTTTAGCCGCAGCTTATATAGGTGAATCCATGGAAGGTCATCAT---  
---

ATGATATTTTCAACTTTAGAGCATATATTAACATCATATATCGTTTTTCGGTCGTATCAATTGTAATTTCAATTCATTTGAT  
AACC-----TTATTT---GTC-----  
AACCAAATTGTAGGATTCTATGATTCGTCCAAAAAAGGCATGATAATAACTTTTTTGTGTATAACAGGATTATTAATTAC  
TCGTTGGTTTTTTTTTCAGGCCATTTACCATTTAGTGATTTATATGAATCCTTAATCTTTCTTTTCATGGGGTTTTTCGATTT  
TTTATATGGTTCGCGT-----TTTTAA---AAACAAAAAACGAT---  
TTAAGTACAATAATTGCACCTAGTGTTATTTTTACCCAAGGCTTTGCTACTTCGGGTCTTTTAAACCGAAATGCATCAATC  
TGTAATATTAGTACCCGCTTTACAATCCCATTGGTTAATGATGCACGTAAGTATGATGATCTTAGGCTATGCAGCTCTTT  
TATGTGGATCACTATTATCAGTAGCTATTTTAGTCATTACATTTCAAGAATTA--ATACCAATTTTGGGT---  
AAAAGCAAAAGATTGAGTTTT-----TTA---  
TATGAATCATTTGATTATGCTGAAATCAAATACATAAATATGAATGAAAGA-----AACAAATGTTTTA-----  
CGA-----AAAATTCT-----TTTTCA-----  
TCTTATAGAAATTTACAGGTATCAATTTATTCAACAATTGGATCGTTGGGGTTATCGTATTATTAGTCTAGGTTTTAT  
CTTTTTAACGATCGGTATTTCTTTTCAGGAGCAGTATGGGCTAACGAGGCATGGGGATCTTATTGGAATTGGGATCCCAAGG  
AAACTTGGGCCTTTATTACTTGGACAATATTCGCGATTTATTTACATAGTAGAAAA-----  
AATAAAAAACTGGAAGGT-----  
TTAAATCTTCAATAGTGGCCTCTATAGGCTTTCTTATAATTTGGATATGTTATTTTGGGGTCAATCTATTAGGAATAGG  
ACTACATAATTATGGTTCGTTT-----ACATCTAAT-----  
-----ATG---GCAAAAAAG-----  
-----AAAGCATCTATTCCCTTTCTA-----TCTCTCACATCTATAGTCTTT-----  
TTGCCCTGGTGCATCTCTTTTACATGT-----  
AAGAAAGGTATGGAATATTGGGTTACTAATTGGTGAATACTAAGCAATCCGAAATTTTCTTGAATATCATTCAAGAAAA  
GAGCATTCTAAAAAATTCATGGAATTAGAGGAAGTCTTCTTTG-----  
GATGAACTGCTAAAGGAA---  
TATTCGGAAACACGTCTTCAAATCCTCCGTACCGGAATCCACAAAGAAACAATTCAATTGATCAAGACGCACAACGAAGA  
TCGTATCTATACAATTTGCACCTTCTCGACAAATATAATCTATTTTCAATTATTCTAAGTGGTTATTCTATTCTAGGTAATC  
AAGAACTTATTATTCTTAACTCTTGGGTTCAAGAATTCCTATATACTTAAAGTACACAATAAAAGCTTTTTCTATTCTT  
TTAGTAACTGATTTATGTATAGGGTCCATTCGACTCATGGTTGGGAAGTACTGATTGGGTCCGTCTATAAAGATTTTGG  
ATTTATTCCAGAATGATCAA-----  
ATTATATCTGGTCTTGTTTCTACTTTTTCCAGTGATTTTAGATACAATTTTAAAATATTGGATTTTCCGTTATTTAAATCG  
TGTATCTCCTTCACTTGTAGTGATTTATCATTCAATGAATGAC-----  
ATGCCCATTTGGTGTTCAAAAGTGCCCTTTTGAAGTCT-----  
-----GGAGAGGAAGAT-----  
--GCATCTTGGGTTGACATATAACAATCGACTTTATAGAGAAAGACTGCTT---  
TTTTTAGGCCAGGAAGTTAATAGTGAATATCAAATCAAC

Morus

TGTTAATGAACAAGACGTACTTCTATTTATCGACAATATCTTTTCGTTTTGTCCAAGCGGGATCCGAAGTATCCGCCTTAT  
TGGGTAGAATGCCTTCTGCTGTGGGTTATCAACCCACTCTTAGTACCGAAATGGGTTCTTTACAAGAAAGAATTACTTCT  
ACCAAAGAGGGGTCCATAACTTCTATTCAAGCAGTTTATGTACCTGCGGACGATTTGACCGATCCAGCTCCGGCCACGAC  
ATTTGCACATTTAGATGCTACTACCGTACTATCAAGAGGATTGGCCGCCAAAGGCATCTATCCAGCAGTAGATCCTTTAG  
ATTC AACGTCAACTATGCTCCAACCTCGGATTGTTGGTGAAGAACATTATGAAACTGCGCAAAGAGTTAGACAAACTTTA  
CAACGTTACAAAGAACTTCAGGACATTATAGCTATCCTTGGGTTGGACGAATTATCCGAAGAAGATCGCTTAAACCGTAGC  
AAGAGCACGAAAAATTGAGCGTTTCTGTGCAACCTTTTTTGTAGCAGAAGTATTTACCGGTTCCCCAGGGAAATATG  
TTGGTCTAGCAGAAACAATTAGAGGGTTTAAATTGATCCTTTCTGGAGAATTAGATGGTCTTCTTGAACAGGCTTTTTAT  
TTGGTAGGTAACATCGATGAAGCTACCGCGAAGGCTATGAACCTTAGAA-----ATGGAG---  
AACAAATTGAAGAAATGAATGACCTTAAATCTTTGTGTACTGACCCCGAATCGAATTGTTTGGGATTTCGGAAGTGAAGA  
AATAATTTTATCTACTAATAGTGGACAAATTGGCATATTACCAAATCACGCGCCTATTGCCACAGCCGTAGATATCGGTA  
TTTTGAGAATACGC---CTT-----  
AACGACCAATGGTTAACGATGGCTCTGATGGGCGGTTTTGCTAGAATAGGTAATAATGAGATCACTGTTTTAGTAAATGA  
TGCGGAGAAGGGTAGTGACATTGATCCACAAGAAGCTCAGCAAACCTTGAATGGCGGAAGCTAACTTGAAGTAAAGCTG  
AAGGCAAGAGACAAACAATTGAGGCAAATCTAGCTCTCAGACGAGCTAGGACACGAGTAGAGGCTATCAATATGATGTCG  
TAA-----ATGAAAAATGTAACCGATCCTTTCTTTCC---TTG---  
AGTTATTGGCCATCCGCCGGAAGTTTTCGGGTTT---  
AATACCGATATTTTAGCAACAAATCCAATAAATCTAAGTGTAGTGCTTGGTGTATTGATTTTTTTTTGGAAAGGGAGTG--  
-----  
TTAAGTGATTTATTAGATAATCGAAAACAGAGGATCTTGAAGACTATTCGAAATTCAGAAGAATACGCGAAGGGGCCCT  
AGAACAGCTGGAAAAAGCCGTTCCCGCTTACGAAAAGTAGAAAAGGAAGCGGATCAGTTTCGAGTGAATGGATATTCTG  
AGATAGAACGAGAAAAATTGAATTTGATTAATTCAACTTCTAAGACTTTGGAACAATTAGAAAATTACAAAAATGAAACC

ATTCATTTTGAACAACAAAGAGCGATTAACGAAGTTCGACAACGGGTTTTTCAACAAGCCTTAGAAGGAGCTCTAGGAAC  
TCTGAATAGTTGTTTTG-----  
AACAAACGAGTTACATTTACGTACCATCAGTACTAATATTGGCATGTTTGGAAACCATGAAA-----GAAATA---  
ACGGACTAGATGAATCCACTGATTTCTGCCGCTCCGTTATTGCTGCTGGATTGGCCGTAGGGCTTGCTTCTATTGGACC  
TGGAGTTGGTCAAGGTACTGCTGCGGGACAAGCTGTAGAAGGGATCGCGAGACAACCAGAGGCAGAGGGAAAAATACGAG  
GTACTTTATTGCTTAGTCTGGCTTTTATGGAAGCTTTAAACAATTTATGGACTCGTTGTGGCATTAGCACTTTTATTGCG  
AATCCCTTTGTTTAAATGAATGTTTTA-----TTATGTTCCATCAACACACTA---AAA---GGGTTA---  
TACGATATATCCGGCGTGGAAGTAGGCCAACATCTCTATTGGAAAATAGGAGGTTTCCAAGTTCATGCCCAAGTACTTAT  
TACTTCTTGGGTTGTAATTGCTATCTTATTAGGTTCCATCCATTATAGCTGTT---  
CGTAATCCACAACAATTCCTACTGACGGTCAGAATTTCTTTGAATATGTCCTTGAATTCATTGAGACGTGAGCAGAAC  
CCAGATTGGA---  
GAAGAATATGGTCCATGGGTTCCATTTATTGGAACATGTTTCTATTTATTTTTGTTTTCGAATTGGTCAGGGGCTCTTTT  
ACCTTGGAAAATCATAACAGTTACCTCATGGTGAGTTAGCCGCACCCACAAATGATATAAAATACTACCGTTGCTTTAGCTT  
TACTCACGTCAGTAGCATATTTCTATGCGGGCCTTACCAAAAAGGGATTAGGTTATTTTCGGTAAATACATTCAACCAACT  
CCAATCCTCTTACCCATTAACATCCTAGAAGATTTCAAAAACCCCTATCGCTTAGTTTTCGACTTTTCGGAAATATATT  
AGCTGATGAATTAGTAGTTGTTGTTCTTGTCTTTAGTACCTTTAGTGGTTCCTATACCTGTCATGTTCCCTTGGATTAT  
TTACAAGTGGCATTCAAGCTCTTATTTTTGCAACTTTAGCTGCGGCTTATATAGGAGAATCCATGGAAGGTCATCATTGA  
---  
ATGATATTTTCAACTTTAGAGCATATATTAACCTCATATATCCTTTTCAGTCGTTTCAATTGTAATTACAATTCATTTGAT  
AACC-----TTATTA---GTC-----  
GATGAAATCATAGGACTATATGATTCGTTAGAAAAGGGGATGATGACTACTTTTTTCTGTATAACAGGATTATTAATGAC  
TCGTTGGATTTATTTGAGATATTTACCATTAAGTAATTTATATGAATCATTAACTTTCTTTTCATGGAGTTTCTCCATTA  
TTCATATGGTTCGGTAT-----TTTTAA---AAGTATAAAAACCTAT---  
TTAAAGGCAATAACCGCGCCAAGTGCTATTTTTACCCAAGGTTTGGTACTTTCGGGTCTTTTAACTGAAATGCATCAATC  
CGAAATATTAGTACCAGCTCTCCAATCCCATTGGTTAATGATGCACGTAAGTATGATGGTATTGGGCTATGCAGCTCTTT  
TATGCGGATCATTATTACTAGCTCTTCTAGTCATTACATTTGCAAAAATTC---ATAAGTATTTTTAGT-----  
AAAAGCAATAATTTT-----GTA---AATGAGTCGTTTTCTCTGGGCGAGATTCAATATGTGAGA-----  
GAAAAG-----AATAATCTTTTA-----CCA-----AACACCTCT-----TTTCTT-----  
-  
TCTTCTAGGAATTATTACAGGTTTCAATTGATTCAACAATTGGATCTTTGGAGTTATCGTATTATTAGTCTAGGGTTTAT  
CTTTTTAACCATAGGTATTCTTTTCGGGAGCAGTATGGGCTAATGAAGCATGGGGATCATATTGGAATTGGGATCCAAAGG  
AGACTTGGGCATTTATTACGTGGACCCTATTTTTCGATTTATTTACATACTCGAACA-----  
AATAAAAATTTTGAAGT-----  
GTAAATTCGCAATTGTAGCCTCGATGGGCTTTCTTATAATTTGGATATGCTATTTTGGGGTTAATTTATTAGGAATAGG  
GTTGCATAGTTATGGTTCATTTACCTTAACATCTAATTGA-----  
-----ATG---GCAAAAAAG-----  
-----AAAGCATTATTTCCCTTCTA-----TATCTTGCATCTATAGTATTT-----  
TTGCCTTGGTGGATCTCTCTCATTACATTTAATAAAAAGTCTGGAATCTTGGGTTAATAATTGGTGGAAATACTAGGCC  
CTCCGAAATTTCTTTGAACGATATTCAAGAAAAGAGTATTCTAAAAAAATTCATAGAATTAGAGGAACTCTCCCTCTC-  
-----GACGAAATGCTAAAGGAA---  
TACTCGGAAAGGCGTTTACAAAAGCTTCACGTCGGAGTCTACAATGAAACGATCCAATGGATCAAGATGCACAATGAGGG  
TCGTATCCATACGATTTTACATTTCTCAACAAATATAATTTCTTTTCGTTATTCTAAGTGTTTTTTCTATTCTAAGTAATG  
AAGAACTTATTTTTCTTAACTCTTGTCTTCAAGAATTTCTATATAATTTAAGCGACACAATAAAGGCTTTTTTCTATTCTT  
TTATTAACCGATTTATGTATAGGATTCCATTCGCCCATGGTTGGGAACATGATTGGCTCTATCTACAAAGATTTTGG  
ATTTGCTCATAATGATCAA-----  
ATTATATCCGGTGTGTTTCTACTTTTCCAGTCATTTTAGATACAATTTTTAAATATTGGATTTTTCGTTATTTAAATCG  
TGTATCTCCGTCACCTGTAGTAATTTATCATTCAATGAATGATTGA-----  
ATGCCTATTGGTGTTCAAAAGTACCTTTTCGAAGTCCT-----  
-----GGAGACGAAGAT-----  
--GCATCGTGGGTTGACGTAATCAACCGACTTTATCGAGAAAGATTACTT---  
TTTTTAGGCCAAGAGGTTGATAGCGAGATCTCGAATCAAC

Nandina

TGTTAATGAACAAGACGTACTTCTATTTATTGACAATATTTTTCGTTTTCGTCCAAGCAGGATCCGAAGTATCTGCTTTAT  
TAGGCAGAATGCCCTCTGCTGTAGGTTATCAACCGACTCTTAGTACAGAAATGGGTTCTTTGCAAGAAAGAATTACTTCT  
ACCAAAGAGGGATCCATAAATCCATTCAAGCAGTTTATGTACCTGCGGACGATTTGACTGACCCCGCCCTGCCACAAC  
ATTTGCACATTTAGATGCCACTACCGTACTATCAAGAGGACTGGCTGCCAAAGGTATCTATCCAGCAGTAGATCCTTTAG  
ATTCACGTCAACTATGCTCCAACCTCGGATCGTTGGTGAGGAACATTATGAAACTGCGCAAAGAGTTAAGCAAACCTTA

CAACGTTACAAAGAACTTCAGGACATTATAGCTATTCTTGGATTGGACGAATTATCCGAAGATGATCGTTTTAACCGTAGC  
AAGAGCACGAAAAATTGAGCGTTTCTTATCACAACCCTTCTTCGTAGCAGAAGTTTTTACAGGTTCCCGGGGAAAAATATG  
TTGGTCTAACAGAAACAATTAGGGGGTTTTCAACTGATCCTTCCGGAGAATTAGATAGTCTTCCCGAGCAGGCCTTTTAT  
TTGGTAGGTAACATCGATGAAGCTACCGCGAAGGCTATGAACTTAGAC-----GTGGAG---AGCAAATTGAAGAAA--  
-  
ATGACCTTAAACCTATGTGTAAGTACTGACTCCTAATCGAATTGTTTTGGAATTCAGAAGTGAACGAAATCATTTTTATCTACTAA  
TAGTGGCCAAATTGGTGTATTACCAAATCACGCCCTATTGCCGCGGCTGTAGATATAGGCATTTTGAGAATACGT---  
CTT-----  
AACGACCAATGGTTAACAATAGCTCTGATGGGGGGTTTTCGCTAGAATAGGCAATAATGAAATAACCGTTTTAGTAAATGA  
TGCGGAGAGGGGTAGTGACATTGATCCGCAAGAAGCTCGGCAAACCTTTGAAATCGCCGAAGCTAACTTGAGTAGAGCTG  
AAGGCAAGAGACAAACAATTGAGGCAAATTTAGCTCTCAGACGAGCTAGGACGCGGGTAGAGGCGATTAATGCCATCTCG  
TAA-----ATGAAAAATGTAACCGATTCTTTTCGTTTTCC---TTG---  
GGTCACTGGCCATCCGCCGGGAGTTTTCGGATTT---  
AATACCGATATTTTAGCAACAAATCCAATAAATCTAAGTGTAGTACTTGGTGTATTGATCTTTTTTTGGAAAGGGAGTG--  
-----  
TTAAGTGATTTATTAGATAATCGAAAACAGAGAATCTTGAATACTATTTCGAAATTCAGAAGAAGTGCCTGAAGGTGCCAT  
TGAAAGGCTGGAAAAAGCCCGGGCCCGCTTACGGAAAGTGGAAAAGGAAGCAGAGGATTATATAGTGAATGGATATCAGG  
AAATAGAACGAGAAAAATTAATTTGCGTAATTTCAATAGGTAAGAATTTGGAACGGTTAGAAAATTACAAAAACGAAACC  
ATTCAGTTTTGAACAACAAAGAGCAATTAATCAAGTCCGACAACGAGTTTTCCAACAAGCCTTACAAGGAGCTCTAGGAAC  
TCTGAATAGTTGTTTTG-----  
AACAACGAGTTACATTTACGCACCATCAGTGCTAATATTGGGATGTTTGGGGCGATGAAA-----GAAATA---  
ACTGAT---  
ATGAATCCATTGATTTCTGCCGCTTCCGTTATTGCTGCTGGATTGGCCGTAGGGTTGGCTTCTATTGGACCTGGAGTTGG  
TCAAGGTACTGCCGCGGGCCAAGCCGTAGAGGGTATCGCGAGACAACCAGAGGCAGAGGGTAAAATACGAGGTACTTTAT  
TGCTTAGTTTGGCTTTTATGGAAGCTTTAACTATTTATGGACTGGTCTGGCATTAGCACTTTTATTTGCAAATCCTTTT  
GTT---ATGAATGTTCTA-----CCATGTTTCGATCAACACACTA---AAA---GGTCTA---  
TACGAAATATCCGGTGTGGAAGTAGGCCAACATTTCTATTGGCAAATAGGGGGTTTTCCAAGTACATGCCCAAGTACTTAT  
TACTTCTTGGGTCTGAATGGCTATCTTACTAGGTTTCAGCCACTATAGTTGTT---  
CGAAATCCACAACCAATTTCCGACCGACGGTCCAGAATTTCTTCGAATATGTCCTTGAATTCATTTCGAGACTTGAGTAAAC  
TCAAATTTGGA---  
GAAGAATATGGTCTTGGGTTCCCTTTATTGGAACATGTTCTTATTTATTTTTGTTTTCTAACTGGTCAGGGGCTCTTTT  
ACCTTGGAAATCATAACAGTTACCTCATGGGGAGTTAGCCGCACCCACGAATGATATAAATACTACTGTTGCTTTAGCTT  
TACCTACGTCAGTGGCATATTTCTATGCGGGTCTTACAAAAAAGGATTGGGTTATTTTCGGTAAATACATTCAACCAACT  
CCAATCCTTTTACCTATTAACATCCTAGAAGATTTTACAAAACCCCTATCACTTAGTTTTTCGACTTTTTGGGAATATATT  
GGCTGATGAATTAGTAGTTGTTGTTCTTGTCTTTAGTACCTTCAGTGGTTTCTATACCTGTTATGTTCTTGGGTTAT  
TTACAAGTGGTATTCAAGCTCTTATTTTTGCAACTTTAGCCGCGGCTTATATAGGGGAATCCATGGAGGGTCATCAT---  
---  
ATGATATTTTTGACTTTAGAACATATATTAACCTCACATATCTTTTTCGATTGTTTTCAATTGTAATTACGATTTATTTGAT  
GACC-----TTATTA---GTC-----  
CACGAAACTGTAGGACTATATGATTCGTACAGAAAAGGACTGATAGCTACTTTTTCTGTATAACAGGATTTTTAGTTAT  
TCGTTGGATTTATTCTGGGCATTTCCCTTAAAGTGATTTATACGAATCATTAAATGTTCCCTTTCATGGAGTTTTTCCATTA  
TTCATATGGTTCCTAT-----TTTACG---AACCATAAAAAATCTT---  
TTAAGTACAATAACTGCACCAAGTGCTATTTTTACCCAAGGCTTTGCTACTTCAGGTCTTTTAACTGAAATGCATCGATC  
CACAAAATTAGTACCTGCTCTCCAATCCCAGTGGTTAATGATGCATGTAAGTATGATGATATTGAGCTACGCAGCTCTTC  
TATGTGGATCATTATTATCAATAGCTCTTCTAGTAATTACATTTGAAAAAAC---GTAGAGAATTTTGGT---  
AAAAGTAAAAGCAATCCTTTT-----TTA---ATTGGGCCGTTTTCTTTGGCGAGATCAAATACGTGAAT-----  
-GAAATA-----AACAATGTTTTA-----CGA-----AACACTTTT-----TTGATT-----  
--  
TCGTTTAGAAAATTTTCGTAGGTATCAAGTGATTGAGCAATTGGATTGTTGGAGTTGTCGTGTCATTAGTCTAGGGTTTAT  
CTTTTTAACCATCGGCATTCTTTTCAGGAGCAGTATGGGCTAATGAAGCATGGGGATCATATTGGAATTGGGACCCCAAAG  
AAACTTGGGCATTTATTACTTGGACTATATTCGCGATTTATTTGCATACTCGAACA-----  
AATAAAAATTTGCAAGGC-----  
ATAAATTCTGCAATTGTAGCTTCTATAGGATTTCTTATAATTTGGATCTGCTATTTCCGGGTAAATCTATTAGGAATAGG  
GCTACATAGTTATGGTTCAATT-----ACATCTAAT-----  
-----ATG---ACAAAAAG-----  
-----AAAGCATTACCCCCCTTCCA-----TATCTTGCATCTATAGTATTT-----  
TTGCCCTGGTGGATCTCTTTCTCATT-----

AATAAAAGTCTGGAATCCTGGGTTATTCATTGGTGAATACTAGTCAACCCGAAGCCTTTTTGAATGATATTCAAGAAAA  
GAACGTTCTAGAAAAATTCATAGAATTAGAAGAAGCTTTTTCTTTTG-----  
GACGAAATGATAAAGGAG---  
TACCCGAAGACACATATACAAAAGTTTTCGTATAGGAATCCACAAAAGAAACGATACAATTGGTCAAGATGCACAATGAGGG  
TCATATCCATACCTTTTTACAATTCTCGACAAAATAATAAGTTTTGCTATTCTAAGTGGTTATTCTATTCTGGGTAATG  
AAGAAGTTGTCGTTCTTAATTCTTGGATTCCGGAATTTCTCTATAATTTAAGCGACACAATAAAAGCTTTTTCTATTCTT  
TTGTTAACTGATTTATGTATTGGATTCCATTTCGCTCATGGTTGGGAAGTAATGATTGATTTTGTCTACAAGGATTTTGG  
ATTTTCTCATAATGATCAA-----  
ATTATATCTGGTCTTGTTCACCTTTCCAGTCATTCTAGATACCATTTTTAAATATTGGATCTTCCGTTATTTAAATCG  
TGTATCTCCCTCACTTGTAGTAATTTATCATTCAATGAATGACTAA-----  
ATGCCTATTGGTGTTCAAAAGTACCCTTTCCGGAGTCCG-----  
-----GGAGAGGAGGAT-----  
--GCAGTTTGGGTTGACGTATACAACCGACTTTATCGAGAAAGATTACTT---  
TTTTTAGGCCAAGAGGTTGATAGCGAGATCTCGAACCAAC

Nicotiana

TGTTAATGAGCAAGACGTACTTCTTTTTATTGACAATATCTTCCGTTTCGTCCAAGCAGGATCCGAAGTATCGGCCTTAT  
TGGGTAGAATGCCTTCCGCTGTGGGTTATCAACCCACCCTGAGTACCGAAATGGGTTCTTTACAAGAAAGAATTACTTCT  
ACCAAAGAAGGGTCCATAACCTCTATTCAAGCAGTTTATGTACCCGCAGACGATTTGACCGACCCTGCTCCTGCTACGAC  
ATTTGCACATTTAGATGCTACTACCGTACTATCAAGAGGATTGGCTGCCAAAGGTATTTATCCAGCAGTAGATCCTTTAG  
ATTCACGTCACCATGCTTCAACCTCGGATCGTTGGTGAGGAACATTACGAAACCGCCAAAGAGTTAAGCAAACCTTTA  
CAACGTTACAAAGAAGCTTCCAGGACATTATAGCTATCCTTGGATTGGACGAATTATCCGAAGAGGATCGTTTACTCGTAGC  
AAGAGCGCGAAAAATTGAGCGTTTCTTATCACAACCTTTTTCGTAGCAGAAGTATTTACCGGTTCTCCAGGTAATATG  
TTGGTCTAGCAGAAACAATTCCAGGATTTCAATTGATCCTTTCCGGAGAATTAGATGGTCTTCTGAACAGGCCTTTTAT  
TTGGTAGGTAATATCGATGAAGCTACCGCGAAGGCTATGAAGTTAGAA-----ATGGAG---AGCAATTTGAAGAAA--  
-

ATGACCTTAAATCTTAGTGTACTGACCCCTAATCGAATTGTTTGGGATTCAGAAGTGAAGAAATTGTTTTATCTACTAA  
TAGCGGTCAAATGGCATATTACCAAATCACGCCCTATTGCCACAGCTGTAGATATAGGGATTTTGAGAATACGT---  
CTT-----

AACGACCAATGGTTAACGATGGCTCTGATGGGTGGTTTTGCTAGAATAGGCAATAATGAGATCACTGTTTTAGTAAATGA  
TGCGGAGAAGGGTAGTGACATTGATCCACAAGAAGCTCAGCAAACCTTTGAACTAGCGGAAGCTAATGTGAAAAAGGCTG  
AAGGAAGGAGACAAAAAATTGAGGCAAATCTAGCTCTCCGACGAGCTAGAACACGGGTGGAGGCTATCAATCCGATTTCA  
-----ATGAAAAACGTAACCGATTCTTTCGTTTCT---TTG---

GGCCACTGGCCATCTGCCGGGAGTTTCCGGTTT---  
AATACCGATATTTTAGCAACAAATCCAATAAATCTAAGTGTAGTGCTTGGTGTATTGATTTTTTTTTGGAAAGGGAGTG--  
-----

TTAAGTGATTTATTAGATAATCGAAAACAGAGGATCTTGAATACTATTTCGAAATTCAGAAGAAGTGCCTGGAGGGGCTAT  
TGAACAACCTCGAAAAGCTCGTTCTCGCTTACGGAAAGTCGAAAGCGAAGCCGAGCAGTTTCGAGTGAATGGATACTCTG  
AAATAGAACGAGAAAAATTGAATTTGATTAATTCAACTTATAAGACTTTGGAACAATTAGAAAATTACAAAAACGAAACG  
ATTCAGTTTGAACAGCAAAGGGCGATTAATCAAGTCCGACAACGGGTTTTCCAACAAGCCTTACGAGGAGCTCTAGGAAC  
TCTGAATAGTTGTTTG-----

AACAACGAGTTACATTTACGTACCATTAGGTCCAATATTGGCATGTTGGGAACAATGAAA-----GAAATA---  
ACTGAT---

ATGAATCCACTGATTTCTGCCGCTTCCGTTATTGCTGCTGGATTGGCCGTAGGGCTTGCCTTCTATTGGACCCGGAGTTGG  
TCAAGGGACTGCTGCGGGTCAAGCTGTAGAGGGTATCGCGAGACAGCCTGAGGCAGAGGGAAAAATACGAGGTACGCTAT  
TGCTTAGTCTAGCTTTTATGGAAGCTTTAACAATTTATGGACTGGTTGTAGCATTAGCACTTTTATTTGCGAATCCTTTT  
GTT---ATGAATGTTCTA-----TCATGTTCCATCAATACTCTA---AAG---GGTTA---

TACGATATATCCGGTGTGGAAGTAGGCCAACATTTCTATTGGCAAATAGGGGGTTTCCAAGTACATGGCCAAGTACTTAT  
TACTTCTTGGGTTGTAATTGCTATCTTATTAGGTTCCAGCCACTATAGCTGTT---

CGGAACCCACAAACCATTCCGACCGGGGTGAGAATTTCTTCGAATATGTTCTTGAATTTATTTCGAGATGTGAGTAAAC  
TCAAATTGGC---

GAAGAATATGGGCCCTGGGTTCTTTTTATTGGCACTATGTTTTTATTTATTTTGTCTAATTGGTCAGGAGCTCTTTT  
ACCTTGGAAAATCATACAATTACCTCATGGGGAGTTAGCCGCACCCACGAATGATATAAATACTACTGTTGCTTTGGCTT  
TACTCACATCAGTGGCATAATTTCTATGCGGGTCTTACAAAAAAGGATTAGGTTATTTTCGAAAATATATTCAACCAACC  
CCAATCCTTTTACCCATTAACATCTTAGAAGATTTACAAAACCTTTATCACTTAGTTTTCGACTTTTTCGGGAATATCTT  
AGCTGATGAATTAGTAGTTGTTGTTCTTGTTCCTTTAGTACCTTTAGTAGTTTCTATACCTGTCATGCTCCTTGGATTAT  
TTACAAGTGGTATTCAAGCTCTTATTTTTGCAACTTTAGCCGCGGCTTATATAGGTGAATCCATGGAGGGCCATCAT---  
---



ATGATATTTTCAACCTTAGAGCATATATTAACCTCACATTTTCTTTTCGATCGTTTTCAATTGTAATTACAATTCATTTGAT  
AACC-----TTTTTA---GTC-----  
GATGAAATCGTAAAACCTATACGATTCATCAGAAAAGGGCATAATAGTTACTTTTTCTGTATAACAGGATTATTAGTTAC  
TCGTTGGATTTCTTCTGGACATTTCCCACTAAGCGATTTATATGAATCATTAAATTTTCTTTTCATGGAGTTTCTCCCTTA  
TTCATATAAATCCGTAT-----TTCAA---AAAAATGTTTTAATT---  
TTAAGTAAAATAACTGGCCCTAGTGCTATTTTTACCCAAGGCTTTGCTACGTCAGGTATTTAACTGAAATACACCAATC  
TGTAATATTAGTACCTGCTCTTCAATCCGAGTGGTTAATAATGCACGTAAGTATGATGATATTGGGCTATGCAGCTCTTT  
TATGTGGATCATTATTATCAGTAGCACTTCTAGTGATTACATTTCGAAAAAC---AGACAGCTTTTTTAT-----  
AAGAGCAATGGTTTT-----TTA---AACGAGTCATTTTTC-----TTGGGT-----GAA--  
-----AATGTTTTA-----CAA-----AATACTTCT-----TTTTT-----  
TCTGCTAAAAATTATTACAGGTCCCAATTGATTCAACAATTGGATTATTGGAGTTATCGGGTTATTAGTTTAGGATTTAC  
TTTTTAACCATAGGAATCCTTTTCGGGAGCGGTATGGGCTAATGAAGCGTGGGGTTCGTATTGGAATTGGGACCCAAAAG  
AAACTTGGGCATTTATTACTTTGGATCGTATTTGCAATTTATTTACATACTCGAACA-----  
AATAGAAATTTGCGGGGT-----  
GCAAATCTGCAATTGTAGCGTCTATAGGCTTTCTTATAATTTGGATATGCTATTTTGGGGTCAATCTTTTAGGAATAGG  
GTTACATAGTTATGGTTCTTTTCCATCAACATTTAAT-----  
-----ATG---GCAAAAAAG-----  
-----AAAGCATTCACTCCTCTTTTC-----TATCTTGCATCTATAGTATTT-----  
TTGCCCTGGTGGATTTCTTTCTCAGTT-----  
AATAAATGTCTGGAATCTTGGGTTACCAATTGGTGGAACTACTGGGCAATCCGAAATTTTTTTGAATAATATTCAAGAAAA  
GAGTCTTCTAGAAAAATTCATAGAATTAGAGGAACCTCTTCTTG-----  
GACGAAATGATCAAGGAA---  
TACTCGGAAACACATCTCGAAGAGTTTGGGATAGGAATCCATAAAGAAACGATCCAATTAATCAAGATACAAAATGAGAA  
TCGTATCCATACGATTTTGCACCTTCTCGACAAATATCATCTGTTTTATTATTCTAAGCGGGTATTCAATTTTGGGTAATG  
AAAACTTGTTATTCTTAACTCTTGGGCTCAGGAATTCCTATATACTTAAAGTACACAGTAAAAGCTTTTTCTATTCTT  
TTATTAATGATTTATGTATCGGATTCATTACCCCCACGGTTGGGAATTAATGATTGGCTCTATCTATAAAGATTTTGG  
ATTTGTTTATAATGATCAA-----  
ATCATATCTGGTCTTGTTCACCTTTCCAGTCATTCTCGATACAATTTTTAAATATTGGATTTTCCGTTATTTAAATCG  
TCTGTCTCCGTCACCTTGTAGTTATTTATCATTCAATGAATGAC-----  
ATGCCTATTGGTGTTCAAAAGTCCCTTTCCGAAGTCCT-----  
-----GGAGAGGAAGAT-----  
--GCATCTTGGGTTGACGTATAACAACCGACTTTATCGAGAAAGATTACTT---  
TTTTTAGGCCAAGAGGTTGATAGCGAGATTTTCAATCAAC

Nuphar

TGTTAATGAACAAGACGTACTTCTATTTATCGACAATATCTTTTCGCTTTCGTCCAAGCGGGGTGAGAAGTATCTGCCTTAT  
TAGGTAGAATGCCTTCCGCCGTGGGTTATCAGCCTACCCTTAGTACAGAAATGGGTTCTTTGCAAGAAAGAATTACTTCT  
ACTAAAGAAGGATCTATAACTTCCATTCAAGCAGTTTATGTACCTGCGGACGATTTGACTGATCCTGCTCCTGCTACGAC  
ATTTGCGCATTTGGATGCTACTACCGTACTATCAAGAGGATTAGCTGCCAAAGGTATCTATCCAGCAGTAGATCCTTTAG  
ATTC AACGTCAACTATGCTCCAACCTCGGATCGTTGGCGAAGAACATTACGAAACTGCGCAAAGAGTTAAGCAAACCTTA  
CAACGTTACAAAGAACCTTCAAGGACATTATAGCTATTCTTGGACTGGACGAATTATCCGAAGAGGATCGTTTAAACCGTAGC  
AAGAGCGCGAAAAATTGAACGTTTCTTATCACAACCTTCTTTGTAGCAGAAGTATTTACTGGTTCTCCAGGGAAATATG  
TTGGTCTCGCAGAAACAATTAGGGGGTTTCAACTGATCCTTTCCGGAGAATTAGATAGTTTTCCCGAGCAGGCCTTTTAT  
TTGGTAGGTAATATCGATGAAGCTACCGCGAAGGCTATGAACCTAGAA-----GTAGAG---AGCAAATTGAAGAAA--  
-  
ATGACCCTAAATCTTAGTGTACTGACTCCTAATAGAATTATTTGGGATTCAGAAGTGAAGAAATCATTTTATCTACTAA  
TAGTGGCCAAATCGGCGTATTACCAAACCACGCCCCGTTGCCACGGCCGTGGATATCGGTATTTAAGAATACGC---  
CTC-----  
GACGACCAATGGTTAACGATGGCTCTGATGGGGGGTTTGCAGAATAGGCAATAATGAAATCACCATATTAGTAAATGA  
TGCGGAGAAGGGTAGTGATATTGATCCGCAAGAAGCTCAGCAAACCTTGAATAGCTGAAGCTAACCTGAGGAAAGCGG  
AAGGCAAGAGACAAGTAATTGAGGCGAATTTAGCTCTCAGACGAGCTAGGGCACGAGTAGAGGCTATCAATGCTATTTCCG  
TAC-----ATGAAAAATCTAACCGATTCTTTTCGTTTTT---TTG---  
GGTCACTGGCCATCCGCCGGGAGTTTCGGGTTT---  
AATACCGATATTTTAGCAACAAATCTAATAAATCTAAGTGTAGTGCTTGGTGTATTGATCTTTTTTCGGAAAGGGAGTG--  
-----  
TTAAGTGATTTATTAGATAATCGAAAGCAGAGGATCTTGGAGTACTATTTCGCAATTCAGAAGAATCTCTGGAGGAGCCGT  
TGAGCAGCTTGAAAAGCACGGGCTCGCTTACGGAAAGTGGAAAGGGAAGCGGAGGAGTTTCGAGTGAATGGATACTCTG  
AGATAGAACAAGAAAAGGTGAATTTGATTAATGCCGCTTATCAGAATTTGGAACAATTAGAAAATTACAAAACGAAACC

ATTCATTTTCGAACAACAAAGAGCGATTAATCAGGTCCAACAACGAGTTTTCCAGCAAGCCTTACAAGGGGCTCTAGGAAC  
TCTGAATAATTGTTTTG-----  
AACGGCGAGTTACATTTACGCACCATCGGTGCTAATATTGGCATACTCGGGGCCATGAAA-----GAAATA---  
ACCGAT---  
ATGAATCCCCTAATTTCTGCTGCTTCCGTTATTGCTGCTGGATTGGCCGTAGGACTTGCTTCTATTGGACCCGGAGTCGG  
TCAAGGTACTGCTGCGGGCCAAGCCGTAGAAGGTATCGCTAGACAACCAGAAGCAGAGGGTAAAATACGAGGTACTTTAT  
TGCTTAGTCTGGCTTTTATGGAAGCTTTAACAATTTACGGGCTGGTTCGTGGCATTAGCACTTTTATTTGCTAATCCCTTT  
GTG---ATGAATGTTCTA-----CCATGTTCCATCAACACACTA---AAG---GGGTTA---  
TACGAGATATCCGGTGTGGAAGTAGGCCAACATTTCTATTGGCAAATAGGGGGTTTCCAAGTGCATGCCCAAGTACTTAT  
AACTTCTTGGGTGCTAATTGCTATCTTATTAGGTTCCAGCCGTATAGCCGTT---  
CGGAATCCACAAACTATTCCGACCGACGGCCAGAATTTCTTCGAATATGTTCTTGAATTCATTTCGAGACGTGAGCAAAAC  
TCAAATTTGGAGAAGAAGATATGGTCCTTGGGTTCTTTTATTGGAACTCTGTTCCCTATTTATTTTTGTTTTCTAACTGGT  
CAGGTGCTCTTTTACCTTGGAGAATCATACAGTTACCTCATGGGGAGTTAGCTGCACCTACGAATGATATAAAATACTACT  
GTTGCTTTAGCTTTACTCACGTCAGTGGCATAATTTCTATGCAGGCCTTACTAAAAAGGGATTGGGTTATTTTCGGTAAATA  
CATTCAACCAACTCCAATACTTTTACCAATTAATGTCTTAGAAGATTTTCAAAAACCTTTTACTTACTTTTTCGACTTT  
TCGGGAATATATTGGCCGATGAATTAGTAGTTGTTGTTCTTGTCTTTAGTACCTTTAGTGATTCTTATACCTGTGATG  
TTCTCGGATTATTCACAAGCGGTATTCAAGCTCTGATTTTTGCAACCTTAGCCGCGGCTTATATAGGTGAATCCATGGA  
AGGTCATCAT-----  
ATGATATTTGCAACTTTAGAACATATATTAACTCACATATCTTTTTTCGATCATTTCGAATTGTGATTCTACTCATCTGAT  
GACC-----TGCTCG---GTC-----  
TATGAAATTTGTTAGGACTATGTGATTTGTTCGAAAAAGGCATGATAGCTACTTTTTTCTGTATAACAGGATTATTAGTTAC  
TCGTTGGATTTATTTCGGGACATGTACCATTAAGTGATTTATATGAATCATTAAATGTTCCCTTTCATGGAGTTTCTCTTTTA  
TTCATATAGTTCCATAT-----TTTAGA---AACTATAAGAATTAT---  
TTCAGTACAATAACCGCCCCAAGCGCTATTTTAAACCCAGGGCTTTGCCACTTCGGGTCTTTTAACTAAAATGCATCAATC  
TGCAATATTAGTGCCTGCTCTCCAATCCCCTGGTTAATGATGCACGTAAGTATGATGCTGTTGAGCTATGCAGCTCTTT  
TATGTGGATCATTATTATCCATAACTCTCCTGGTCAATTACATTTAGAAGAAAC---ATAGATATTATCGGT-----  
AAAACCAATCATTTA-----TTA---ATTAGTTCATTTTCTTTTGATGAGATCCAATACTTGAAT-----  
-----GTT-----  
TCGTTTAGAAATTATCACAGATATCAATTGACTCAGCGATTGGATCATTGGAGTTATCGTGTCACTGGGCTTGGGTTTTAC  
CCTTTTAACTATAGGTATTCTTTTCAGGAGCAGTATGGGCTAATGAGGCATGGGGATCTTATTGGAATTGGGACCCCAAGG  
AAACCTGGGCATTTATTACTTGGACCGTATTTCGCGATTTATTACATACTAGAACA-----  
AATAAAAGTTTGAAGGT-----  
GCAAATTCAGCAATTGTAGCTTCTATAGGATTTCTTATAATTTGGATCTGCTATTTTCGGGGTTAATCTATTAGGAAGAGG  
GCTACATAGTTATGGTTCATTACATTAACATC-----  
-----GAAGTG---ACGAAAAAG-----  
-----AAAGCATTGAATCCCCTACCA-----TATCTTGCATCTATCGTATTT-----  
CTGCCCTGGGGAATTTCTCTCTCATT-----  
AATAAAAGTATGGAACCTTGGGTGACTAATTGGTGGAAATACCAGCCAATCCGAACTTTTTTGAATGATATTCAAGAAAA  
GAACATTCTAGAAGGATTATAAAATTAGAAGAACTGTTCTTGTG-----  
GACGAAATGATAAAGGAG---  
TATCCGGAGACACATATACAAAAGCTTCGTATAGGAATCCACAAAAGAAACGATACAGTTGGTAAGAATGCACAATCAAGA  
TCATATACATATCATTGTCATTTCTCGACAAATATAACCTGTTTCGCTATTCTAAGTGCTTATTCTATTCTGGGTAATG  
AAGAACTTATCGCTCTTAATTCTTGGGTTCAGGAATTCCTCTATAACTTAAGCGACACAATAAAAGCTTTTTTCTATTCTC  
TTATTAACCGATTTATGTATTGGATTCCATTGCCCCACGCTTGGGAATAATGATTGGTTCGTTCTACAAAAGATTTTGG  
ATTTGTTTCAGAATGATAAA-----  
ATTATATCCGGTCTCGTTTCTACTTTTCCGGTCAATTCTAGATACAATTTTGAATATTGGATCTTTCATTATTTAAATCG  
TGTATCTCCTTCACTTGTAGTGATTTATCATTCACTGAATGAG-----  
ATGCCCATTTGGTGTTCAAAAGTCCCTTTTCGGAGTCT-----  
-----GGAGAGGAAGAT-----  
---GCAGTTTGGGTTGACATA---AACCGACTTCATCGAGAAAGATTACTT---  
TTTTTAGGCCAAGGTGTTGATAGCGAGATCTCGAATCAAC

Nymphaea

TGTTAATGAACAAGACGTACTTCTATTTATTGACAATATCTTTTCGCTTCGTTCAAGCGGGGTGAGAAGTATCTGCCTTAT  
TAGGTAGAATGCCTTCCGCCGTGGGTTATCAGCCTACCCTTAGTACAGAAATGGGTTCTTTGCAAGAAAGAATCACTTCT  
ACTAAAGAGGGATCTATAACTTCCATTCAAGCAGTTTATGTACCTGCGGACGATTTGACTGATCCTGCTCCTGCCACGAC  
ATTTGCACATTTAGATGCTACTACCGTACTATCAAGAGGATTAGCTGCCAAAGGTATCTATCCAGCAGTAGATCCTTTAG  
ATTCACGTCAACTATGCTCCAACCTCGGATTGTTGGCGAAGAACATTACGAAACTGCGCAAAGAGTTAAGCAAACCTTA

CAACGTTACAAAGAACTTCAGGACATTATAGCTATTCTTGGACTGGACGAATTATCCGAAGAGGATCGTTTTAACCGTAGC  
AAGAGCGCGAAAAATTGAACGTTTCTTATCACAACCCTTCTTCGTAGCAGAAGTATTTACTGGTTCTCCAGGGAAATATG  
TTGGTCTCGCAGAAACAATTAGGGGGTTTTCAACTGATCCTTTCCGGAGAATTAGATAGTTTTCCCGAGCAGGCCTTTTAT  
TTGGTAGGTAATATCGATGAAGCTACCGCGAAGGCTATGAACTTAGAA-----GTAGAG---AGCAAATTGAAGAAA--  
-  
ATGACCCTAAATCTTTGTGTAAGTACTGACTCCTAATAGAATTATTTGGGATTTCAGAAGTGAAAGAAATCATTTTTATCTACTAA  
TAGTGGCCAAATCGGCGTATTACCAAACCACGCCCTATTGCCACGGCCATAGATATTGGTATTTTAAAGAATACGC---  
CTC-----  
GACGACCAATGGTTAACGATGGCTCTGATGGGGGGTTTTGCCAGAATAGGCAATAATGAAATCACCATATTAGTAAATGA  
TGCGGAGAAGGGTAGTGACATTGATCCGCAAGAAGCTCAGCGAACTCTTGAAATAGCTGAGGCTAACTTGAGTAAAGCAG  
AAGGCAAGAGACAAGTAATTGAGGCGAATTTAGCTCTCAGACGAGCTAGGGCACGAGTAGAGGCTATCAATGCTATTTTCG  
TAC-----ATGAAAAATCTAACCATTCTTTTCGTTTTT---TTG---  
GGTCACTGGCCATCCGCCGGGAGTTTTCGGGTTTT---  
AATACCGATATTTTAGCAACAAATCTAATAAATCTAAGTGTAGTGCTTGGTGTATTGATCTTTTTTGGAAAGGGAGTG--  
-----  
TTAAGTGATTTATTAGATAATCGAAAGCAGAGGATTTTGGTACTATTTCGCAATTCAGAAGAATATGCGGAGGAGCCGT  
TGAGCAGCTTGAAAAAGCACGGGCTCGCTTACGGAAAGTGGAAAGGGAAGCGGAAGAGTTTTCGAGTGAATGGATACTCTG  
AGATAGAACAAGAAAAGATGAATTTGATTAATGCCGCTTATCAGAATTTGGAACAATTAGAAAATTACAAAAACGAAACC  
ATTCATTTTCAACAACAAGAGCGATTAATCAGGTCCAACAACGAGTTTTTCCAACAAGCCTTACAAGGGGCTCTAGGAAC  
TCTGAATAATTGTTTTG-----  
AACGGCGAGTTACATTTACGCACCATCGGTGCTAATATTGGCATACTTGGGGCCATGAAA-----GAAATA---  
ACCGAT---  
ATGAATCCCCTAATTTCTGCTGCTTCCGTTATTGCTGCTGGATTGGCCGTAGGACTTGCTTCTATTGGACCCGGAGTCGG  
TCAAGGTACTGCTGCGGGCCAAGCCGTAGAAGGTATTGCTAGACAACCAGAAGCAGAGGGTAAAATACGAGGTACTTTAT  
TGCTTAGTCTGGCTTTTATGGAAGCTTTAACAATTTACGGACTGGTTCGTGGCATTAGCACTTTTATTTGCTAATCCCTTT  
GTG---ATGAATGTTCTA-----CCATGTTCCATCAACACACTA---AAG---GGGTTA---  
TACGAGATATCCGGCGTGGAAGTAGGCCAACATTTCTATTGGCAAATAGGGGGTTTTCCAAGTGCATGCCCAAGTACTTAT  
AATTTCTGGGTCGTAATTGCTATCTTATTAGGTTTCAGCCGCTATAGCCGTT---  
CGGAATCCACAAACTATCCCGACCCGACGGTCAGAATTTTTTTGAATATGTTCTTGAATTCATTTCGAGACGTGAGCAAAAC  
TCAAATTTGGAGAAGAAGAATATGGTCTTTGGGTTCTTTTTATTGGAACCTGTTTCTTATTTTGTTCCTAATCTGTT  
CAGGTGCTCTTTTACCTTGGAGAATCATAAGTTACCTCATGGGGAGTTAGCTGCACCCACGAATGATATAAATACTACT  
GTTGCTTTAGCTTTACCCACGTCAGTGGCATAATTTCTATGCAGGCCTTACTAAAAAGGGATTGGGTTATTTTCGGTAAATA  
TATTCAACCAACTCCAATACTTTTACCAATTAATGTCTTAGAAGATTTTCAAAAACCTTTTACTTAGTTTTTCGACTTT  
TCGGGAATATATTGGCCGATGAATTAGTAGTTGTTGTTCTTGTCTTTAGTACCTTTAGTGATTCTTATACCTGTGATG  
TTCTCGGATTATTCACAAGCGGTATTCAAGCTCTCATTTTTTGCAACCTTAGCCGCGGCTTATATAGGTGAATCCATGGA  
AGGTCATCAT-----  
ATGATATTTGCAACTTTAGAACATATATTAACTCACATATCTTTTTTCGATCATTTCGAATTGTGATTCTTACTCATCTGAT  
GACC-----TTG---GTC-----  
TATGAAATTTGTTAGGACTATGTGATTCGTGAGAAAAGGCATGATAACTACTTTTTTCTGTATAACAGGATTATTAGTTAC  
TCGTTGGATTTATTCGGGACATGTACCATTAAGTGACCTATATGAATCATTAAATGTTCCCTTTTCATGGAGTTTCTCTCTTA  
TTCATATAGTTCCATAT-----TTTAGA---AACTATAAGAATTTT---  
TTCAGTAAAATAACCGCCCCAAGCGCTATTTTAAACCAAGGCTTTGCCACTTCGGGTCTTTTAACTAAAATGCATCAATC  
CGCAATATTAGTACCTGCTCTCCAATCCCGTTGGTTAATGATGCACGTAAGTATGATGTTGTTGAGTTATGCAGCTCTTT  
TATGTGGATCATTATTATCCATAACTCTCCTGGTCAATTACGTTTAGAAGAAAG---ATAGATATTTTCGGT-----  
AAGACCAATCATTTA-----TTA---ATTAGTTCAATTTCTTTTGTGATGAGACCCAATACGTGAAT-----  
-----TTT-----  
TCGTTTAGAAATTATCACAGATATCAATTGACTCAGCGATTGGATTATTGGAGTTATCGTGTCAATGGCTTGGGTTTTAC  
CCTTTTAACTATAGGTATTCTTTTTCAGGAGCAGTATGGGCTAATGAGGCATGGGGATCTTATTGGAATTGGGACCCCAAAG  
AAACTTGGGCATTTTACTTGGACCGTATTTCGCGATTTATTTACATACTAGAACA-----  
AATAAAAGTTTGAAGGT-----  
GCAAATTCAGCAATTGTGGCTTCTATGGGATTTCTTATAATTTGGATCTGCTATTTTGGGGTCAATCTATTAGGAAGAGG  
GCTACATAGTTATGGTTCATTACATTAACATC-----  
-----GTG---ACGAAAAAG-----  
-----AAAGCATTGAATCCCCTACCA-----TATCTTGCATCTATCGTATTT-----  
CTGCCTTGGGGAATTTCTCTCTCATT-----  
AATAAAAGTATGGAACCTTGGGTGACTAATTGGTGGAAATACCAGCCAATCCGAACTTTTTTGAATGATATTCAAGAAAA  
GAACATTCTAGAAGGATTATAAAATTAGAAGAACTGTTCTTGTG-----

GACGAAATGATAAAGGAG---  
TATCCGGAGACACATATACAAAAGCTTCGTATAGGAATCCACAAAGAAACGATACAATTGGTAAGAATGCACAATCAAGA  
TCATATACATATTATTTTGCATTTCTCGACAAATATAACCTGTTTCGCTATTCTAAGTGCTTATTCTATTCTGGGTAATG  
AAGAACTTATCACTCTTAATTCTTGGGTTTCAGGAATTCCTCTATAACTTAAGCGACACAATAAAAGCTTTTTCCATTCTC  
TTATTAACCGATTTATGTATTGGATTCCATTGCCCCACGCTTGGGAACATAATGATTGGTTCGTTCTACAAAGATTTTGG  
ATTTGTTTCAGAATGAGAAA-----  
ATTATATCCGGTCTCGTTTCTACCTTTCGGGTCATTCTAGATACAATTTTGAATATTGGATCTTTCATTATTTAAACCG  
TGTATCTCCTTCACTTGTAGTGATTTATCATTCACTGAATGAG-----  
ATGCCCATTTGGTGTTCACAAAAGTCCCTTTTCGGAGTCT-----  
-----GGAGAGGAAGAT-----  
--GCAGTTTGGGTTGACATATACAACCGACTTCATCGAGAAAGATTACTT---  
TTTCTAGGCCAAGGCGTTGATAGCGAGATCTCGAATCAAC

Oenothera

TGTTAATAAACAAAATGTACTTCTATTTATCGACAACATCTTCCGTTTCGTCCAAGCAGGATCCGAAGTATCCGCCTTAT  
TGGGCCGAATGCCTTCCGCTGTGGGTTATCAACCCACCCTTAGTACCGAAATGGGTTCTTTACAAGAAAGAATTACTTCT  
ACTAAAGCGGGATCCATAACTTCTATTCAAGCAGTTTATGTACCGGCGGACGATTTGACCGACCCTGCTCCTGCCACGAC  
CTTTGCACATTTAGATGCGACGACCGTCTATCAAGAGGATTGGCTGCCAAAGGTATCTATCCAGCAGTGGATCCTTTAG  
ATTC AACGTCAACTATGCTCCAACCTCGAATCGTTGGCGACGAACATTATGAAACTGCACAAAGAGTAAAGGAAACCTTA  
CAACGTTACAAAGAACTTCAGGACATTATATCTATCTTGGGTTGGATGAATTATCCGAAGAGGATCGCTTAACTGTAGC  
ACGAGCACGAAAAATTGAGCGTTTCTTATCACAACCCTTTTTTCGTAGCAGAAGTATTTACAGGTTCCCGGGGAAATACG  
TTGGTCTAGCAGAAACCATTAGAGGGTTTAAATTGATCCTTTCCGGAGAATTAGATGGTCTTCTGAACAAGCCTTTTAT  
TTGGTTCGGTACCATCGATGAAGCTACCGCGAAGGCTGCGAACTTAGAA-----ATGGAG---AGTGATTTGAAGAAA--  
-

ATGACCTTAAATCTTTGTGTATTAACCCCTAATCGAATTGTTTGGGATTCAGAAGTGAAGAAATCATTTTATCTACTAA  
TAGTGGACAAATTGGCGTATTACCAAATCACGCACCTATTGCCACAGCTGTAGATATAGGTATTTAAGAATACGC---  
CAA-----  
AACGGACAGTGGTTAACGATGGCTCTGATGGGGGTTTTGCTAGAATCGGCAATAATGAGATCACTATTTTGTAAATGA  
CGCGGAAAAGGGTAGTGACATTGATCCACAAGAAGCCAGGAAACTCTTGGACTAGCGGAAGCTAACTTTAGGAAAGCGG  
AAGGCAAGAGACAAACAATTGAAGCAAATCTGGCTCTCAGACGAGCTAGGACACGCGTTGAGGCTATCAATGTGATTTCA  
-----ATGAAAAATGTAACCGATTCTTTCTGTTTCC---TTG---  
GTTCACTGGCCATCCGCCGGGAGTTTCGGGTTT---  
AATACCGATATTTTAGCAACAAATCCAATAAATCTAAGCGTAGTGCTTGGTGTATTGATCTGTTTTGGAAAGGGAGTG--  
-----

TTAAGTGATTTATTAGATAATCGAAAACAGAGGATCTTGAATACTATTTCGTAATTCAGAAGAATTACGCGAGGGGGCCAT  
CGAACAGCTGGAAAAGCCCGGGCCCGTTTACAGGACGTGCAAATCGAAGCGGAAGGGTATCGAGCGTACGGGTACTTTG  
GGATAGACGAGCAAAGGCACGAGTCGATTAATTCAACTTATAAGACCTTGGAAACAATTAGAAAATAACAAAAACGAAAGC  
ATTCATTTTGAACAACAAAGGGCGATTAATCAAGTCCGACAGCAGATTTTCCAACAAGCCTTACAAGGAGCTTTAGGAAC  
TCTGAATAGTTGTTTTG-----  
AACAACGAGTTACATTTACGGACCATCAGTGCTAATATTGGCCTGTTTGGGTCGATGAAA-----GAACTC---  
ACTGAT---

ATGAATCCACTGATTTCTGCCGCTTCCGTTATTGCTGCTGGATTAGCTGTGCGGGCTTGCTTCTATTGGACCTGGAATTGG  
TCAAGGTACTGCTGCGGGACAAGCTGTAGAAGGTATCGCGAGACAGCCCGAGGCAGAGGGGAAAAATACGAGGTACTTTAT  
TGCTTAGTCTGGCTTTTATGGAAGCGTTAACAATTTATGGATTGGTGTAGCCTTAGCACTTTTATTTGCGAATCCCTTT  
GTA---ATGGATGTTCTA-----TCATGTTCCAACAACACACTA---AAA---GGGTTA---  
TACGACATATCTGGTGTGGAAGTTGGCCAACATTTCTATTGGCAAATAGGAGGTTTTCAAGTCCATGGCCAAGTACTTAT  
TACCTCTTGGGTTGTAATTGCTATCTTATTAGGTTTCAGCCAGTATAGCTGTT---  
CGGAATCCACAACAATTCCAAATGACAGTCAGAATTTCTTCGAATATATCCTTGAATTCATTTCGAGATGTTAGTAAAC  
CCAGATTGGA---

GAAGAATATGGTCCATGGGTTCCTTTTATTGGAACATGTTTCTATTTATTTTTGTTTCTAATTGGTCAGGAGCTCTTTT  
ACCGTGGAAACTCGTAGAGTTACCTCACGGGGAGTTAGCTGCGCCACCAATGATATAAATACTACTGTTGCTTTAGCTT  
TACTCACGTCAGTAGCCTATTTCTATGCGGGTCTTAGCAAAAAGGGGTTAGGTTATTTTCAGTAAATACATACAACCAACC  
CCAATCCTTTTACCCATTAACATCTTAGAAGATTTACAAAACCTTTATCCCTTAGTTTTTCGACTTTTCGGAAATATATT  
AGCCGATGAATTAGTAGTTGTTGTTCTTGTGTTCTTTAGTACCTTCAGTCGTTTCTTATACCTGTGATGTTCTGGGATTAT  
TTACGAGTGGTATTCAAGCTCTTATTTTTGCAACGGTAGCTGCGGCTTATATAGGCGAATCCATGGAGGGTCATCAT---  
---

ATGATATTTTATACTCTAGAACATATATTAACCTCATATATCCTTTTCGCTCGTTTCAATTGGAATTACAATTTTTTTGAT  
AACC-----TTATCA---GTC-----

GATGAAATCATAGGACTATATGATTCGTCAGAAAAAGGCGTGATAGGAACTTTTTTATGTATAACAGGATTATTAGTCAC  
TCGTTGGGCGTATTCGGGACATTTTCCATTAAGTAATTTATATGAATCATTACTTTTTCTGTCATGGAGTTTCGCGATTA  
TTCATATGTTTCCATAT-----TTTAAA---AAACAGAAAAGTTAT---  
GTAAGGACAATAACCTCGTCAAGTACTATTTTTACCCAGGGCCTTGTTACTTCAGGTCTTTAAGTGAAATGCAGCAATC  
AGAAATATTAGTACCTGCGCTCCAATCCCAATGGTTAATGATGCACGTAAGTATGATGGTATTGGGCTATGCAGCTCTTT  
TGTGTGGATCATTATTATCAGTAGCTCTCTTAGTCATTACATTTTCGAAAAGCT---CTAAGAATTTTTAGT-----  
AAAAAGAAAGCATT-----TTA---AAAGATTCATTTTCCTTTGTGGAGATCCAATATAGGAAT-----  
GAACCA-----AGCAATGTTTTA-----CTA-----AGCACCTCT-----TTTATT-----  
-

TCTTCTAAAAACTATTACAGGGCTCAACTGATTCAACAATTAGATCGTTGGAGTTCTCGTATTATTAGTCTAGGATTTAT  
CTTTTTAACCATAGGTATTCTTTCTGGAGCAGTATGGGCTAATGAGGCGTGGGGATCCTATTGGAATTGGGATCCAAAAG  
AACTTGGGCATTTATTACTTGGACCATGTTTGGGATTTATTTACATACTCGAACA-----  
AATCCAAATTTTCAAAGT-----  
GTAAATCCGCAATTGTGGCTTTTCTGGGCTTTATTATAATTTGGATATGCTATTTTCGGGGTCAATTTATTAGGAATAGG  
CTTACATAGTTATGGTTCATTT-----AATTTACAT-----  
-----ATG-----AAAAA-----

-----AAGAAATTCCTTCCGCTTCTA-----TATCTTACAGCTATAGTCTTT-----

TTTCCCTGGTGGATCTCCCTCTTATTT-----

AATAAAGGTCTTGAATCTTGGGTTACTAATTGGTGGAAATACTACGCACTCGGAACTTTTTTGACTGATATGCAAGAAAA  
GAGTATTCTAGACAAATTCATAGAATTAGAAGAACTCTTACTCTTA-----

GACGAAATGATAAACGAA---

TACCCGAAACACATCTCCAAACACTTGGTATAGGAATCCACAAAGAAATGGTCCGCTTGATTAAGATGCGCAACGAGGA  
TCATATCCATACAATTTGCACTTATCGACAAATATAATCTGTTTCATTATTTCCGCGGTTATTCTATTCTGGGTAATA  
AAGAACTTCTCATTCTTAACTCTTGGATGCAAGAATTCCTATATACTTAAAGTACACAATAAAAGCTTTTTTCGATTCTT  
TTATTAAGTATTTTTGTATCGGATTCCTCGCCCATGGTTGGGAATAATGATTGCTTATGTCTACAAAGATTTTGG  
ATTTGCTCAGAACGATCAA-----

ATTATATCTGGTCTTGTTCCTACTTTTCCAGTCACTCTAGATACAATTTTTAAATATTGGATTTTTCGTTATTTAAATCG

TGTATCACCTCCTTGTAGTATTTATGATTCAATGAATGAC-----

ATGCCGATTGGTATGCCTAAAATCCCTTTCCTGCTTGAC-----

GGAGACGAAGAAGATGAAGAGGAAGACGACGCGACTTGGGTTGACCTGTATAACGTACTTTATCGAACCCAGATCCATC--

-TTTTTAGGCGACGCAATTCCTTTCGAGGTCGCGAATCACA

Oryza

TGTTAATAAGCAAGACGTGCTTCTATTATCGATAATATCTTTTCGTTTTGTTCAAGCAGGATCGGAGGTATCTGCCTTAT  
TAGGGAGAATGCCCTCTGCAGTGGGTTATCAACCTACTCTTAGTACAGAAATGGGTTCTTTGCAAGAAAGAATTACTTCT  
ACTAAAAGGGATCTATAACTTCGATCCAAGCGGTTTATGTACCTGCGGACGATTTGACCGACCCTGCTCCTGCTACAAC  
ATTTGCACATTTGGATGCTACTACCGTACTTTCCAGAGGATTAGCTTCCAAAGGGATTTATCCTGCAGTAGATCCTTTAG  
ATTC AACCTCAACTATGTTACAACCTCGGATCGTTGGCAACGAACATTATGAAACTGCGCAAAGAGTTAAGCAAACCTTTA  
CAACGTTACAAAGAACTTCAGGACATTATCGCAATTTGGGTTGGATGAATTATCGGAGGAGGATCGTTTAACTGTAGC  
AAGAGCACGAAAATTTGAGCGCTTCTTATCACAACCGTTTTTGTGGCAGAAGTTTTTACCGGTTCTCCGGGAAAGTATG  
TTGGTCTTGCAAGAACTATTAGGGGATTTCAACTAATCCTTTCCGGAGAATTAGACGGCCTACCCGAACAGGCTTTTTAT  
TTGGTGGGTAACATCGATGAAGCTAGCACGAAAGCTATAAATTTAGAA-----GAGGAG---AACAAATTGAAGAAA--  
-

ATGAAATTAATCTTTATGTACTGACTCCTAAGCGAATTATTTGGGATTGTGAAGTGAAGAAATCATTTTATCTACTAA  
TAGTGGCCAAATTTGGCGTATTACCAAACACGCCCCCATTAACACAGCTGTAGATATGGGTCCCTTGAGAATACGC---

CTCCTC-----

AACGATCAATGGTTAACGGCGGTTCTGTGGAGCGGTTTTGCCAGAATAGTTAATAATGAGATCATCATTTTAGGAAATGA

TGCGGAACTGGGTAGTGACATTGATCCGGAAGAAGCTCAACAGGCACTTGAATAGCCGAAGCTAACGTGAGTAGAGCTG

AGGGTACGAAAGAATTGGTTGAAGCGAAGGTAGCTCTCAGACGAGCTAGGATACGAGTCGAGGCTGTTAATTGGATTCCC

CCATCTAAT-----ATGAAAATGTAACCCATTCTTTTCGTTTTT---TTA---

GCTCACTGGCCATCCGCTGGGAGTTTCGGGCTT---

AATACCGATATTTTAGCAACAAATCTAATAAATCTAACTGTAGTGGTTGGTGTATTGATTTATTTTGGAAAGGGAGTG--

TTAAAAGATTTATTAGATAATCGAAAACAGAGGATCTTGAGTACTATTCGAAATTCGGAAGAATTGCGTAGAGGAACCAT

TGAGCAGCTCGAAAAGCTCGAATTCGATTACAGAAAGTCAACTAGAAAGCGGATGAGTATCGAATGAATGGATACTCTG

AGATAGAACGAGAAAAGCAAATTTGATTAATGCCACTTCTATTAGTTTGGAAACAATTAGAAAAGTCTAAAACGAAACC

CTTTATTTTGA AAAACAAAGGGCGATGAATCAGGTCCGACAACGGTTTTCCAACAAGCCGTACAAGGAGCTCTAGGAAC

TCTGAATAGTTGTTTTG-----AATACCGAGTTACATTTCCGTACGATTTCGTGCTAATATTAGCATTCTCGGGGCCATG-  
-----GAA-----  
ATGAATCCACTAATTGCTGCTGCTTCCGTTATTGCTGCTGGATTGGCCGTAGGTCTTGCTTCTATTGGGCCTGGAGTTGG  
TCAAGGTACTGCTGCAGGACAAGCTGTAGAAGGTATTGCGAGACAGCCAGAAGCAGAAGGTAATAATACGCGGTACTTTAT  
TGCTTAGTCTAGCTTTTTATGGAAGCTTTAACAATTTATGGACTAGTTGTGGCACTGGCGCTTTTATTTGCGAACCCTTTT  
GTT---ATGAATATTATA-----CCGTGTTCCATTAAAACACTC---AAG---GGGTTA---  
TACGATATATCGGGCGTAGAAGTAGGCCAACACTTCTATTGGCAAATAGGAGGTTTCCAAATTCATGCCCAAGTACTTAT  
CACTTCTTGGGTGCTAATTACTATCTTGCTAGGTTTCAGTTATCATAGCTGTT---  
CGCAATCCACAAAACCATCCCAACCGATGGTCAGAATTTCTTCGAATATGTCCTTGAGTTTATTCGAGACTTAAGCAAAAC  
TCAGATTGGA---  
GAAGAATACGGTCCCTGGGTTCCCTTTATTGGAACATATGTTCCCTTTTTATTTTTGTTTCGAACTGGTTCGGGTGCTCTTTT  
ACCTTGGAATAATTATACAGTTACCCCATGGAGAATTAGCAGCGCCACGAATGATATAAATACTACTGTTGCTTTAGCTT  
TACTCACGTGAGCGGCATATTTTTATGCGGGTCTTAGCAAAAAAGGATTGAGTTATTTTCGAGAAATATATTAACCAACT  
CCAATCCTTTTACCAATTAACATATTAGAAGATTTACAAAACCAATTATCGCTTAGTTTTCGACTTTTCGGGAATATATT  
GGCGGATGAATTAGTCGTTGTTGTTCTTGTCTTTAGTCCCTTAGTAGTTCCTATACCGGTCATGTTTCTTGGATTAT  
TTACAAGCGGTATTCAAGCTCTTATTTTTGCAACGTTAGCCGCAGCCTATATAGGTGAATCCATGGAGGGTCATCAT---  
---  
ATGCTATTTGCAACTTTAGAACATATACTAACTCATATTTCTTTCTCAACAATTTCAATTGTGATTACGATTCAATTAAT  
AACC-----TTATTA---GTT-----  
CGTGAACCTGGGGGATTGCGTGATTGCTCAGAAAAAGGAATGATAGCCACTTTTTCTGTATAACAGGATTCTTAGTTTT  
TCGTTGGGCTTCTTCGGGACATTTTCCATTAAGTAATTTATATGAGTCATTGATCTTCTTTTCATGGGCTCTGTATATTC  
TTCATATGATTCCAAAG-----ATACAG---AACTCTAAAAATGAT---  
TTAAGCACAATAACTACGCCGAGTACTATTTAACGCAAGGCTTTGCCACGTCGGGTCTTTAACTGAAATGCATCAATC  
CACAATACTAGTACCTGCTCTACAATCTCAGTGGTTAATGATGCATGTCAGTATGATGTTACTAAGCTATGCGACTCTTT  
TGTGCGGATCCTTATTATCCGCCGCTCTTCTAATGATTAGATTTGAAAGAAT---TTAGATTTCTTTTCG-----  
AAAAAGAAGAAAAATGTT-----TTA---AGCAAAACATTTTCTTTAATGAGATTGAATATTTCTAT-----  
GCAAAA-----AGAAGTGCTTTA-----AAA-----AGCACCTTT-----TTTCT-----  
-  
TTATTTCCAAATTATTACAAATATCAATTAATTGAGCGTTTGGATTCTTGGAGTTATCGTGTCTATTAGTCTAGGGTTTAC  
CCTTTTAACCATAGGTATTCTTTGTGGAGCAGTATGGGCTAATGAGGCGTGGGGATCCTACTGGAATTGGGATCCTAAAG  
AAACTTGGGCATTTATTACTTGGACCATATTTGCAATTTATTTACATAGTAGAACA-----  
AATCCAAATTGGAAGGGT-----  
ACGAAGTCAGCATTGTAGCTTCCATAGGATTTCTTATAATTTGGATCTGTTATTTTGGTATCAATCTATTAGGAATAGG  
TTTACATAGTTATGGTTCATTTACATTACCCATC-----  
-----ATG---AAAAAAG-----  
-----AAAGCATTGCCTTCTTTCTTA-----TATCTTGTATTTATCGTACTT-----  
TTGCCTTGGGGAGTCTCTTTCTCTTTT-----  
AACAAATGTCTGGAACCTTTGGATTAAGAATTGGTGGGAATACCAGGCAATCCCAAATCTCTTAACTGCTATTCAAGAGAA  
AAGAGTTCTAGAAAGATTTCATGGAATTAGAAGACCTTTTTATCTTG-----  
GACGAAATGATAAAAGAG---  
AAACCGAATACACATGTACAAAACCCCTTATAGGAATACGCAAGGAAATAATACAATTGGCCAAAATAGATAATGAGGG  
TCATCTCCATATCATTGTCATTTCTCGACAAATATAATCTGTTTGGCTATTCTAAGTGGTTCTTTTTTTCTGGGTAAAG  
AGGAACTTGTTATTTTGAATTCTTGGGTTTCAGGAATCTTCTATAACTTAAATGACTCAGTAAAAGCTTTTTTTATTCTT  
TTAGTTACTGATTTTTTTGTTGGATTTCACTCCACCCGCGGTTGGGAACACTAATTCGTTGGGTCTATAACGATCTTGG  
ATGGGTTCCTAACGAGCTA-----  
ATTTTCACTATTTTTGTTTGTAGTTTTCTGTGATTCTAGATACATGTTTGAATTTTGGGTCTTTTTTTGTTTAAACCG  
CCTATCTCCTTCGCTTGTAGTCATTTATCATTCAATTAGTGAAGCA-----  
ATGCCCATTGGTGTTCAAAAGTACCTTACCGGATTCCC-----  
-----GGAGATGAAGAA-----  
--GCGACTTGGGTTGACTTATACAATGTTATGTATCGAGAAAGGACACTT---  
TTTTTAGGTCAAGAGATTGTTGCGAGGTCACGAATCATA

Panax

TGTTAATGAACAAGACGTACTTCTATTTATCGACAATATCTTCCGTTTCGTCCAAGCAGGATCTGAAGTATCTGCCTTAT  
TAGGTAGAATGCCTTCCGCTGTGGGTTATCAACCCACCCTTAGTACCGAAATGGGTACTTTACAGGAAAGAATTACTTTCG  
ACCAAAGAAGGGTCCATAAATTCTATTCAAGCGTTTTATGTACCTGCAGACGATTTGACCGACCCTGCTCCTGCTACGAC  
ATTTGCACATTTAGATGCTACTACTGTACTATCAAGAGGATTAGCCGCCAAAGGTATCTATCCCGCAGTAGATCCTTTAG  
ATTCACATCAACTATGCTCCAACCTCGGATTGTTGGTGAGGAACATTATGAACTGCGCAAAGGGTTAAGCAAACCTTA

CAACGTTACAAAGAACTTCAGGACATTATAGCTATCCTTGGGTTGGACGAATTATCCGAAGAGGATCGTTTTAACCGTAGC  
AAGAGCGCGAAAAATTGAGCGTTTTCTTATCACAACCCTTTTTTCGTAGCAGAAGTTTTTACTGGTTCTCCAGGGAAATATG  
TTGGTTTTAGCAGAAACAATTAGGGGGTTTTCAATTGATCCTTTCCGGAGAATTAGATGGTCTTCTGAACAGGCCTTTTTAT  
TTGGTAGGTAACATCGACGAAGCTACCGCGAAGGCTATGAACTTAGAA-----ATGGAG---AGCAATTTGAAGAAA--  
-  
ATGACCTTAAATCTTTGTGTACTGACCCCTAATCGAACTGTTTGGGATTCAAAAAGTGAACGAAATCATTTTTATCTACTAA  
TAATGGCCAAATTGGCGTATTACCGGATCACGCCTCTATTGCCACAGCTGTAGATATAGGTATTTTGAGAATACGC---  
CTT-----  
AACGACCAATGGTTAACGATGGCTCTGATGGGTGGTTTTGCTAGAATAGGTAATAATGAGATCACTGTTTTAGTAAATGA  
TGCGGAGAAGAGTAGTGACATCGATTACACAAGAAGCCAGCAAACGCTTGAAATAGCGGAAGCTAATTTAAGAAAAGCTG  
AAGGAAAGAGACAAAAAATTGAGGCAAATTTAGCTCTCCGACGAGCTAGGACACGAGTAGAGACGATCAATGCGATTTTCG  
GAACTAGTCGGTGTGCC-----ATGAAAAATGTAACCGATTCTTTTCGTTTTCT---TTG---  
GGCCACTGGCCGTCCGCCGGGAGTTTTCGGGTTTT---  
AATACCGATATTTTAGCAACAAATCTAATAAATCTAAGTGTAGTGCTTGGGGTATTGATCTTTTTTTGGAAAGGGAGTG--  
-----  
TTAAGTGATTTATTAGATAATCGAAAACAGAGGATTTTGAATACTATTTCGAAATTCAGAAGAACTCCGTGAAGGGGCCAT  
TGAACAGCTGGAAAAAGCCCGGGCGCGCTTACGAAAAGTGGAAATGGAAGCAGATCAGTTTTCGGGTGAATGGATACTCTG  
AGATAGAGCGGAGAAAAGTGGAAATTTTATTAATTCAACTTCTAAGACTTTGGACCAACTAGAAAATTACAAAAACGAACT  
ATTCATTTTTGAACAACAAAGGGCGATTAATCAAGTCCGACAACGGTTTTTCCAACAAGCCTTACAAGGGGCTCTAGGAAC  
TCTGAGTGGTTGTTTTG-----  
AACAACGAGTTACATTTACGTACCATCAGTGCCAATATTGGCATCTTGGGGCGGATGAAA-----GAAATA---  
ACTGAT---  
ATGAATCCACTGATTTCTGCCGCTTCCGTTATTGCTGCTGGATTGGCTGTAGGGCTTGCTTCTATTGGACCTGGAGTTGG  
TCAAGGTACTGCTGCGGGCCAAGCTGTAGAAGGTATCGCGAGACAGCCCGAGGCGGAGGGAAAAATACGAGGTACTTTAT  
TGCTTAGTCTAGCTTTTATGGAAGCTTTAACAATTTATGGCCTGGTTGTAGCATTAGCACTTTTATTTGCGAATCCTTTT  
GTT---ATGAATGTTCTA-----TCCTGTTCCATCAACACACTA---AAA---GGGTTA---  
TATGATATATCCGGTGTGGAAGTAGGCCAACATTTCTATTGGAAAATAGGAGGTTTCCAAGTCCACGGCCAAGTACTTAT  
TACTTCTTGGGTTGTAATTGCTATCTTATTAGGCTCAGCCACTATAGCTGTT---  
CGGAACCCACAACCATCCCGACCGGGTCCAGAATTTCTTCGAATATGTACTTGAATTCATTTCGAGATGTGAGTAAAC  
TCAAATTGGA---  
GAAGAATATGGTCTTGGGTTCCTTTTATTGGAACATGTTTCTATTTATTTTTGTTTCTAATTGGTCAGGAGCGCTTTT  
ACCTTGGAAAATCATAACAATTACCTCATGGGGAGTTAGCCGCACCCACGAATGATATAAATACTACTGTTGCTTTGGCTT  
TACTCACGTCAGTGGCATATTTCTATGCGGGTCTTACCAAAAAGGGATTAGGTTATTTTCGGGAAATATATTCAACCAACT  
CCAATCCTTTTACCATTAAACATCTTAGAAGATTTACAAAAGCCCTTATCACTTAGTTTTCGACTTTTTCGGAGATATATT  
AGCTGATGAATTAGTAGTTGTTGTTCTTGTCTTTAGTACCTTCAGTGGTTTCTATACCTGTCTATGTTCTTGGATTAT  
TTACAAGTGGTATTCAAGCTCTTATTTTTGCAACTTTAGCCGCGGCTTATATAGGTGAATCCATGGAGGGCCATCAT---  
---  
ATGATATTTTCAACTTTAGAGCATATATTAACTCATATTTTCTTTTCAATCGTTTTCAATTGTAATTACAATTCATTTGAT  
AACC-----TTATTA---GTC-----  
GATGAAATCATAAAACTATATGATTCGTACAGAAAAGGGAATGATAGCTATTTTTTTATGTATAACAGGATTATTAGTCAC  
TCGTTGGATTTATTCGAGACATTTCCCACTAAGTGATTTATATGAATCATTAACTTTCTTTTCATGGAGTTTATCAGTTA  
TTCATATAGTTCGGTAT-----TTCAA---AAAAAGAAAAAAAT---  
TTAAGCACAATAACTGCGTCAAGTGTTATTTTTACCCAGGGCTTTGCTACTTCAGGTCTTTTAACTGAAATACATCAATC  
CGCAATATTAGTACCCGCTCTCCAATCCGAGTGGTTAATAATGCACGTAAGTATGATGATATTGAGCTATGCAGCTCTTC  
TATGTGGATCATTATTATCAGTAGCACTTCTAGTCATTACATTTCGAAAAAC---AGAAATATTTTTTGT-----  
AAAAGGAATCCTTTA-----TTA---AATGAGTTATTTTCTTTTGGTGAATCCAATACATGAAT-----  
GAAAGA-----AACAATGTTTTA-----AGA-----ACTACTTTT-----TTT-----  
-  
TCTGCTAAGAATTATTACAGGTTCCAGTTGATTCAACAGTTGGATTATTGGAGTTATCGTGTCTATTAGTCTAGGGTTTAT  
CTTTTTAACCATAGGTATTCTTTTCGGGAGCAGTATGGGCTAATGAAGCATGGGGATCATATTGGAATTGGGACCCAAAGG  
AAACTTGGGCATTTATTACTTGGATCGTATTTGCGATTTATTTACACACTCGAACC-----  
AATATAAAATTACGGGGT-----  
GCAAATTCGCAATTGTGGCGTCTATAGGCTTTCTTATAATTTGGATATGCTATTTTGGAGTCAATCTATTAGGAATAGG  
ACTACACAGTTATGGTTCAATTTACGTTAACGTCTAAT-----  
-----ATG---GCAAAAAAG-----  
-----AAAGCATTCACTCCTCTTTTA-----TATCTTGCATCTCTAGTATTT-----  
TTGCCCTGGTGGATTTCTCTTTTCATTT-----

AATAAAAGTCTGGAATCTTGGGTTACTAATTGGTGAATACTAGGCAATCCGAAATTTTTTTGAATGGTATTCAAGAAAA  
GAATATTCTAGAAAAATTCATAGAATTAGAGGAAATCCTTCTCTTG-----  
GAGGAAATGATCAAGGAA---  
TACTCGGAGACACATCTACAAAACCTTCGTATAGGAATCCACAAAGAAACGATCCAATTCATCAAGATACACAATGAGGA  
TCGTATCCATACGATTTTGCACCTTCTCGACAAATATAATCTGTTTCGTTATTCTAAGTGGTTATTCTATTTGGGGTAATG  
AAGAACTTGTATTCTTAACTCTTGGGCTCAGGAATTCCTATATACTTAAAGTGACACAATAAAAGCTTTTTCTATTCTT  
TTATTAAGTATTATGTATCGGATTCCATTCGCCCATGGTTGGGAACTAATTATTGGCTCTGTCTACAAAGATTTTGG  
ATTTGTTTATAATGATCAA-----  
ATTTTATCTGGTCTTGTCTTACTTTTCCAGTCATTCTAGATACACTTTTTAAATTTTGGATTTTCCGTTATTTAAATCG  
TGTTTCTCCGTCACTTGTAGTGATTTATCATTCAATGAATGAT-----  
ATGCCTATTGGTGTTCAAAAGTACCCTTTTCAAGTCTT-----  
-----GGAGAGGAAGAT-----  
--GCATATTGGGTTGACATATACAACCGACTTTATCGAGAACGATTACTT---  
TTTTTAGGCCAACCGGTTGCTAGCGAGATCTCGAATCAAC

Pelargonium

TGTTAATAAACAAGACGTACTTTTATTTATCGACAATATCTTTTCGCTTCGTCCAAGCAGGATCCGAAGTATCTGCCTTAT  
TGGGTAGAATGCCTTCCGCTGTGGGTTATCAACCCACCCTTAGTACCGAAATGGGTTCTTTACAAGAAAGAATTACTTCT  
ACAAAAAAGGGGTCGATAACTTCTATTTCAGGCAGTTTATGTACCTGCGGACGATTTGACCGATCTGTCTCTGCCACGAC  
ATTTGCACATTTAGATGCTACTACCGTACTATCAAGAGGATTAGCTGCCAAAGGTATATATCCAGCAGTGGATCCTTTAG  
ACTCAACGTCAACTATGCTTCAACCTCGGATCGTCGGCAATGAACATTATGAAATTGCGCAAAGAGTTAAGCAAACCTTTA  
CAACGTTACAAAGAAGCTTCAAGGACATTATAGCTATCCTTGGGTTGGACGAATTATCCGAAGAGGATCGGTTAACCGTAGC  
AAGAGCACGAAAAATTGAGCGTTTCTTATCACAACCTTTTTTGTAGCGGAAGTCTTTACAGGTTCTACGGGTAATATG  
TTGGTCTGTGAGAAACAATTAGAGGGTTTCATTTGATTCTTTCCGGAGAATTTGATGGTCTTCTGAGCAGGCCTTTTAT  
TTGGTAGGTAACATTGATGAAGCTACTGCGAAGGCTATGAAGTTAGAA-----AAGGAG---  
AGTAATTTGAAGAAATGAATGACCTTAAATCTTTGTGTACTGACCCCTAATCGAATCTTTTGGGATTGAGAAAGTAAAGA  
AATCATTTTACCTACTAATAGCGGACAAATTTGGGGTATTACCAAACCACGCATCTATTGTCACAACCTATAGATATAGGTG  
TTTTGAGAATACGCCATTTT-----  
AACGACCAATGGTTCACAATAGCTCTGATGGGCGGTTTTACTAGAATCCGCAATAATGAGATCACTATTTTAGCAACTGC  
TGCAGAAAAGGTTAGTGACATTGATCCACAAGAAGCTCAGCAAACCTTCAATAGCGGAAGATAGCTTGGAGAAAGCTG  
AGCACAAAAGGCAAAGAATCGAGGCGAAGCTAGCTATCAAACGAGCTAGTACACGAGTAAAGGCTATCAATCCTATTTTCG  
TAA-----ATGAAAAATGTAACCGATTCTTTTCGTTTCC---TTG---  
GGTCGCTGGCCATCCGCCGGGAGTTTCGGGTTG---  
AATACCGATATTTTAGCAACAAATCCAATAAATCTAAGTGTAGTACTTGGTGTATTGATCTTTTTTGGAAAGGGAGTG--  
-----  
TTAAATGATTTATTAGATAATCGAAAACAGAGGATATTGAATACTATTTCGAAATTCAGAGGAACTGCGGGGGGGGGCCAT  
TGAACAGCTGGAAAAGGCCCGGGCTCGTTTACGGAAAGTGAAAACGGAAGCGGCTCGGTTTCGAGTGAACCAGTATTCTG  
AGGCGGAACGGGAAAAGTTGAATTTGATTAATTTAACTTATAAGAGTTTAGAAGACTTCGAAAATTACAAAAATGACAGC  
ATTCGTTTTGAACAACAAAGGGCAATTCATCAAGTCCGGCAACGGGTTTTCCAACAAGCCCTACGAGGAGCTTTGAAAC  
TCTGAATAGTTGTTTTG-----  
AACAAGGAATTACATTTACGTACCATTAGTGCTAATATTCGCCTCTTTAGATCGATGAAA-----GAACTA---  
ACTAATTAGATGAATCCACTGATTTCTGCCGCGTCTGTTATTGCTGCTGGGTTGGCCGTCGGGCTTGCTTCTATTGGACC  
TGGGATTGGGCAGGGGACTGCCGCGGGCCAAGCTGTAGAAGGTATCGCGAGACAGCCCGAAGCGGAGGGAAAAATACGAG  
GTACCTTATTACTGAGTCTCGCTTTTATGGAAGCTTTAAACAATTTATGGGCTCGTTGTAGCATTAGCACTTTTATTTGCG  
AATCCCTTTGTTTTAAATGAATATTCTA-----TCATGTTCTATAAACACATTC---AAG---  
GAGTTATTATACGATATATCCGGTGTGGAAGTAGGTCAACATTTTTATTGGCAAATAGGGGGTTTTCCAAGTCCACGGCCA  
AGTACTTATTACTTCTTGGGTTGTAATTGCGATCTTATTAGGTTTATCCATTCTAGCTGTT---  
CGAAATCCGCAAACCATTCGACGGATGTTTCAAGATTTCTTCAATATGTCCTTGAATTCATTTCGAGACGTGAGCAAAC  
TCAGATTGGA---  
GAAGAATACGGCCCATGGGTTCCCTTTATTGGAACCTGTTTTCTTTTTATTTTTGTTTTCGAATTGGTTCGGGGGCTCTTTT  
CCCTTGGAAAATCATAACGTTACCGCAGGGGGAGTTAGCCGCACCTACAAATGATATAAATACAACCGTTGCTTTAGCCT  
TACTCACGTCAGTGGCATATTTTTATGCAGGTCTTACTAAAAAAGGATTGGCTTATTTCAATAAATACATACAACCGACT  
CCAATCCTTTTACCCATTAACATCTTAGAAGATTTTACAAAACCTTTATCACTTAGTTTTTCGACTTTTTCGGGAATATATT  
AGCCGATGAATTAGTCGTTGTTGTTCTTCTTTTCTTTAGTACCTTTAGTGGTTTCTATACCTGTCTGTTCTTGGATTAT  
TTACAAGCGGTATTCAAGCTCTTATTTTTGCAACTTTAGCTGCGGCTTATATAGGCGAGTCCATGGAGGGTTCATCATTGA  
---  
ATGATCTTTTTGACTTTAGAGCACATATTAACCCATATATCTTTTTTCGGTTGTTTTCAATTGTAATTACAATTCATTTGAT  
AAAC-----TTATTG---GTC-----



AATGAAATCGTAGGACTATATAAATTCGTCAGAAAAAGGCATGATAGTGACTTTGTTCTGTATAACAGGATTCTTAATAAT  
TCGTTGGATTTATTTCAGGGCATTTCATTAAGTAATTTATATGAATCCTTAATCTTTCTTTTCATGGAATTTCTCCATTA  
TTAATATGCTTCCGTAT-----TTGAAA---AACCTTAAAAATCAT---  
TTAAGGGAAATAACCTCACCAAGCACTCTTTTTATCCAAGGCTTTGCTACTTCCGGGTCTTTAACTCAAATCCATGAACA  
AAAAATATTAGTGCCCGCTCTCCAATCCCAGTGGTTAATGATGCACGTAAGTATGATGATATTGAGCTATGCATCTCTTT  
TGTGTGGATCATTATTATCAATAGCTCTTCTAGTCATTACATTTTCGAAAAAGT---CGAAGCGTGGTTGGT-----  
AAAAGAAATAAGTTT-----TTA---AATAGGATCTTTTCCAATATCCAATACATAAATGAAAGA-----  
GAGAAG-----ATTTTA-----CTA-----AAGACTTCC-----TTTACC-----  
-

TATTCTATAAATTATTACAGGTCTCACTTGCTTCAACAATTTGATTTTTGGAGTTATCGTATTATTAGTATAGGATTTCT  
ATTTTTAACCATAGGGATTCTTTTCGGGAGCAGTATGGGCTAATGAGGCATGGGGGTTCATATTGGAGTTGGGACCCAAAGG  
AAACTTGGGCGTTTATTACTTGGACGATATTTGCTATTTATTTACATATTCGAGAA-----  
AAGAAAAACGCAGAAGGT-----  
GTAAAATCGGCAATTGTGGCTTCTATTGGCTTTCTTATAATTTGGATATGTTATTTTGGAAATCAATATATTAGGAATAGG  
GTTACATAGTTATGGTTCATTTCCA---ATATCTTAA-----ATTACAGATGCAAAAATG-----AAAAA-----  
-----AAAAGAACCACCCCTTTCTA-----TATCTTGCATCTATAGTCTTT-----  
TTACCCTGGTGGATCTCTCTCTTTCTTT-----

AAGAAAAGTCTAGAATCTTGGGTTACTAATTGGTTGAATATCAGTCAATCCGAACCTTTTTTGAATGATATTCAAGAAAA  
AAGTCTTATAGAAAAATTCATAGAATTAGAGGAACCTCTTCTCTTG-----  
GACGAAATGATAAAGGAA---  
TGCCCCAAACTAGATCTACAAAAGTTTTCGTATAGGAATCCACAAAAGAAACGATCCAATTGATGAATATGTACAATGATGA  
TCGTATCCATACGATTTTGCACCTTCTCGACAAATATAATCTCTTTTCGTTATTCTAAGTGTGGTTCTATTCTGGGTAATG  
AAGAAGTGTATTCTTAACTCTTGGATTAAAGAATTCTTATATAATTTAAGCGACACACTGAAAGCCTTTTGTCTTCTT  
GCATTAAGTATTTTTTGTTCGGATTCCATACGATCAGTGCTTGGGAATTACTAATTGGCTCCGTT-----  
----GTTCATAACGATCAA-----

ATGAGATCTCTTCTTGTGGCTTTTCCCATCCGTTTTACATACCATTTATTACTTTTGGACCTTCAATTATTTAACTG  
TGTATCCCCGTCACTTGTAGTGCTTTATGATTCAGTGTGACGTGACTGAATGCCAGTGGGTGTTCTTAAAGTACCTT  
TTCTAAATCCCAATCCCAGCCCGGATCCCGTAGAAGAAGAAGTTCGACAGC-----  
-----ATGGAGGAAAAG-----  
GCTACTTGGGTTGACTTATATAACCGCCTTTATCGCCAAAGATGGCTT---  
TTTTTAGGCAAAGACCTGGAAGAGGAGGTTGCAAATAACA

Phalaenopsis

TGTTAATGAGCAAGACGTACTTTTTATTCAATTGACAATATATTTTCGTTTTCGTTCAAGCAGGGTCCGAAGTCTCTGCCTTAT  
TAGGTAGAATGCCTTCTGCAGTGGGTTATCAACCTACCCTTAGTACGGAAATGGGTTCTTTGCAAGAAAGAATTACTTCT  
ACCAAGGAAGGATCCATAACATCGATTCAAGCAGTTTTATGTACCTGCGGATGATTTGACCGACCCTGCCCTGCCACGAC  
ATTTGCACATTTAGATGCTACTACCGTATTATCAAGAGGATTAGCTGCCAAAGGTATTTATCCAGCAGTAGATCCCTTGG  
ATTCACGTCAACTATGTTACAACCTCGGATCGTTGGCGAGGAACATTATGAAACTGCGCAAAGGGTTAAGCAAACCTTCA  
CAACGTTACAAAGAAGTTCAGACATTATAGCTATCCTTGGGTTGGACGAATTATCCGAAGAAGATCGTTTAACTGTAGC  
AAGAGCAGCAAATTTGAGCGTTTCTTATCACAACCTTCTTTGTGGCAGAAGTCTTTACTGGTCTCCAGGGAAATATG  
TTGGTCTAGCAGAAACAATTCGGGGTTTTCAATTCATCTTTCCGGAGAATTAGATGGTCTTCCCAGCAGGCCTTTTAT  
TTGGTGGGTAACATCGATGAAGCTACCGCGAAAGCTATGAAGTTAGAA-----GAGGAG---AGCAAATGAAGAAA--  
-

ATGACCTTAAATCTTTGTGTACTGACTCCAAATCGAATGATTTGGGATTCTGAAGTGAAGAGATTATTTTATCTACTAA  
TAGTGGACAAATTTGGGTTATTACCAAATCATGCCCCCATGACCACGGCTGTAGATATAGGTCTTTTGAGAATACGG---  
CTA-----  
AAAGATCGATGGTTAACGGTAGCTCTTATGGGCGGTTTTGCTAGAATAAGTAATAATGAGATCACTATTTTAGGAAATGG  
TGCGGAAATTAGTACTGACATTGATCCACAAGAAGCTCAACAACTCTTGAATAGCTGAAGCTAACTTGAGTAAAGCTG  
AGGGTAAGAGACAAGCAATTGAGGCAAATCTAGCTCTCAGACGAGCTAGGACACGAGTAGAAGCTATCAAAGTAATTTCC  
TCT-----ATGAAAAATATAACCGATTCTTTTGTTC---GTG---  
GGGCACTGGCCATCCGCTGGGAGTTTCGAGTTT---  
AATACCGATATTTTAGCAACAAATCCAATAAATCTAAGCGTAGTGCTGGGTGATTGATTTTCTTTGGAAAGGGAGTG--  
-----

TTAAATGATTTATTAGATAAGCGAAAACAGAGGATCTTGAGTACTATTCGAAATTCAGAAGAATTACGTAGAGGAGCCAT  
TGAACAGCTCGAAAGAGCTCGGGTTAGATTACGCAAAGTAGAAATCGAAGCAGATGAGTATCGAACGAATGGATACTATG  
AGATAGAACGAGAAAAAGGAAATTTGATTAATGCTACTTGAATAGTTTGGAAACGATTAGAAAATTACAAAAATGAACT  
CTTTTTTTTTGAAAAACAAAGAGCAATTAATAAGGTCCGACAAGAAGTTTTGCAACAAGCCTTACAACGAGCTCTAGGAAC

TTTGAATAGTTGTTTG-----  
AATATCGAAGTACATTTTTCTGACTATCAGTGCTAATATTGATATTCTCGGGTCCATGGAA-----GAAATA---  
ACTGAT---  
ATGAATCCACTTATTTCTGCTGCTTCCGTTATTGCTGCTGGATTGGCTGTAGGGCTTGCTTCTATCGGACCTGGGGTTGG  
TCAAGGTACTGCTGCGGGCCAAGCCGTAGAAGGTATTGCGAGACAACCAGAAGCAGAGGGTAAAATACGAGGTACTTTAT  
TGCTTAGTCTGGCTTTTATGGAAGCTTTAACAATTTATGGACTGGTTCGTGGCATTAGCTCTTTTATTTGCAAATCCTTTT  
GTT---ATGAATGTTATA-----CCATGTTCCATTAAAACACTC---AAA---GGGTTA---  
TACGATATATCAGGTGTAGAAGTAGGCCAACATTTATATTGGCAAATAGGAGGTTTACAAATTCATGCCCAAGTACTTAT  
CACTTCTTGGGTTGTAATTGCTATCTTATTAGGTTTCAGTCATCATAGCTGTT---  
CGGAATCCGCAAACCATTCCAACCAACGGTCAGAATTTCTTCGAATATGTCCTTGAATTTATTCAAGACTTGAGCAAAAC  
TCAGATTGGA---  
GAGGAGTATGGTCCTTGGGTTCCTTTTATAGGAACGATGTTCCATTTATTTTTGTTTCTAACTGGTCAGGTGCTCTTTT  
ACCTTGGAAAATCATAAAATTACCTCATGGGGAGTTAGCTGCGCCACGAATGATATAAAATACTACTGTTGCTTTAGCTT  
TACCTACGTCAGTGGCATATTTCTATGCGGGTCTCAGGAAAAAAGGATTGGGATATTTTCGGGAAATACATTCAACCAACT  
CCAATACTTTTACCAATTAATATTCTAGAAGATTTCAAAAACCTTTATCTCTTAGTTTTCGACTTTTCGGTAATATATT  
GGCTGATGAATTAGTGGTTGTTGTTCTTGTTCCTTAGTGCCTTCAGTAGTTCCTATACCTGTCATGTTTCTTGGATTAT  
TTACAAGTGGTATTCAAGCTCTTATTTTTGCAACTTTGGCCGCGGCTTATATAGGTGAATCCATGGAGGGTCATCAT---  
---  
ATGATATTTGCGACCTTAGAGCATATATTAACTCATATTTCCTTTTCGATCATTTCGAATTGTGATTATAATTCATTTGAT  
GAAC-----TTATTA---GTC-----  
TACGAAATCGAAGAATTACGTAATTCATTAGAAAAAGGAATGATAGCTACTTTTTCTCTATAACAGGGTTTTTGTAGTTAC  
TCGTTGGATTTCTTCGGGACATTTTCTTTAAGTAATTTATACGAATCATTAAATTTTCTTTTCATGGAGTTTATCCATTA  
TTCATATAATTTCTGTAT-----ATTAGG---AATTATAAAAATGAT---  
TTAAACGCAATAACTGCACCAAGTGCCATTTTTACCCAAGGTTTCGCCACGTCAGGTCTTTCAACTGAAATGCATCAACC  
CGCAATATTAGTACCTGCTCTACAATCTCAGTGGTTAATGATGCATGTCAGTATGATGTTATTGAGCTATGCAGCTCTTT  
TATGCGGATCTTTATTATCAGTTGCTCTTATAGTGATTACATTTCAAAAAAAAA---ACCGATTTTTTTTTG-----  
AAAAACAAGAATTTTTACAGT---TTA---AGGAAATCGTTTTTCTTTGGTAATATGGAATATTTGAAC-----  
GAAAA-----GGAAGTATTTTA-----AAA-----AAGACTTCT-----TTACTA-----  
-  
TCATTTAAAAATTTTTACAAATATCAATTAATTCAACATTTGGATTCTTGGAGTTATCGTGTCTATTAGTTTGGGTTTAC  
CTTTTTAACCATAGGTATTCTTTCTGGAGCAGTATGGGCTAATGAAGCATGGGGTTTCATATTGGAATTGGGATCCTAAGG  
AAACTTGGGCATTTATTACTTGGACCATATTTGCAATTTATTTACATACTAGAAAA-----  
AATTCAAAATTGCAAGATCAAGTTACGAATTCGGCATTGTAGCTTCTATAGGATTTCTCCTAATTTGGATATGCTATTT  
TGGGATCAATCTATTAGGAATTGGGTTCCATAGTTATGGCTCATTCCAA-----  
-----  
ATG---AAAAAAAAG-----AAAGCATTGGCTTCCCTCCCA-----TATCTTGTGTCTATAATCTTT--  
-----TTGCCCTGGTGGGTTTTCTCTCTCATT-----  
AATAAATGTCTAGAACTTGGGTTATTAATTGGTGGAAATACTAGGCAATCCGAAATCCCTTTGAATGATATTCAAGATAA  
AAATGTTCTAGAAAAATTTATGGAATTAGAAGAACTATTCTGTTG-----  
GACGAGATGATAAAGGAG---  
TACTCGGAAACACATATGCAAAGGCTTCATATAGGAATGCACAAGGAAACAATACAATTTGGTCCAAAGACAAAATGAATC  
TCATTTCCATATCATTTTGCATTTCTCTACAAATCTAATCTGTTTCGCTATTCTAAGTGGTTATTTTTTTCTGGGTAATA  
AAGAACTTTTCATTTTCAATTCTTGGATTTCAGGAATTTCTCTATAACTTAAGTGATACAATCAAAGCTTTTTTCGATTCTT  
TTAGTTACTGATTTATGGATCGGATTTCACTCGACCCATGGTTGGGAACTAATGATTGGTTCGATCTACAATGATTTTGG  
ATTGGCTCAGAATGATCAG-----  
ATTATATCTGGTCTTGTTCCTACTTTCCAGTGATTCTAGATACAATTGTGAAATATTGGATCTTCCATTTTTTAAATCG  
TGTATCTCCTTCGCTTGTAGTAATTTATCATTCAATGAATGAA-----  
ATGCCCATTTGGTGTTCAAAAGTGCCTTTTCGGAATCCT-----  
-----GGAGAGGAAGAT-----  
--GCAGTTTGGGTTGACGTATAACAACCGACTTCATCGAGAAAGATTACTT---  
TTTTTAGGCCAAGAGGTTGATAGCGAGATCTCGAATCAAA

Pinus

TGTCAATGAGCAAGACGTACTATTATTTATTGATAACATCTTCCGTTTTGTCCAAGCGGGATCAGAGGTATCCGCCCTAT  
TAGGCAGAATGCCTTCCGCCGTGGGTTATCAGCCAACCTCTTAGCACGGAAATGGGTTCTTTGCAAGAGAGAATTACTTCC  
ACAAAAAAGGGATCCATAACCTCGATTCAAGCAGTTTATGTACCTGCTGACGACTTGACCGACCCTGCTCCTGCTACGAC  
ATTTGCACATTCAGATGCTACTACCGTACTATCGAGAGGATTAGCTGCGAAGGGTATCTATCCAGCAGTGGATCCTTTAG  
ATTC AACATCGACTATGCTCCAACCTTGGATCGTAGGCGAAGAACATTACGAAACTGCACAAGGGGTTAAGCAAACCTTA

CAACGTTATAAGGAACTTCAAGACATTATAGCTATTCCTGGACTGGATGAATTATCGGAGGAAGATCGTTTAAATCGTGCC  
AAGAGCAAGAAAAATTGAACGTTTCTATCACAACCCTTTTTCTGATAGCAGAGGTATTACAGGTTCCCGGGCAAATATG  
TGGGTCTCATGGAAACAATTAGAGGTTTTCAAATGATCCTTTCTGGAGAATTAGATGGTCTTATCGAACAGTCTTTTTAT  
TTGGTGGGTAATATTGATGAAGCTACCGCGAAGGCTATAAACTCCAGC-----ATGGAA---AGT-----  
-  
ATGACCCTAAATCTTCGTGACTGTCTCCTAATCGAGTCATTTGGGATTCAGAAGTTAAAGAAATAATTCTATCTACTAA  
TAGTGGTCAAATTGGCGTATTACCCAATCATGCTTCACTTGTGGCAGCTGTAGATATAGGAGTTATGAAAATACGT---  
CTC-----  
AATGGGCAGTGGTCCACTATGGCTATGATGGGCGGTTTTCGCCAAGATAGACAGTGATAGAATAACTATATTGGTAAATAA  
TGCAGAGAGAGATGTTGACATCGATCCCCGAGAAGCCAGGAAAAATTTTCGAATAGCTAAAGCTGACTTAGCTCGAGCCG  
AAGGCAAAAGACAAGCAATTGAGGCTGATTTAGCTCTGAAAAGGGCTAGAACCCGATTAGAGGCTATCAATGCTAGCCCC  
CCC---GTCTCTAAT-----ATGAAAAATGTAATTGATCCTTTTCATTTCC---TTG---  
AGTTATTGGCCTTCCGCTGGGGGTTTTCGGATCA---  
AATACCAATATTTTAGAAACAAATATAATAAATTCAAGTGTGGTGCTTAGTGTACTGATCTATTTTGGAAAGGGAGTG--  
-----  
TTAAGTAATCTATTAGATAACCGTAAACAGAAAATATTGGAGACTATTCGGAATTCGGAAGAACTATGTAAAGGAGCTAT  
CGATCAGCTCGAGAAAGCTCGGGCTTGCTTAAGGAACGTGGAAATGATAGCGGACGAAATCCAGGTAAATGGAACTCCC  
AAATAGAACGAGAGAAAGAGGATCTCCTCAATACTGCTTCTGATAATTTGGAACAATTAGAGGATCCCAAGAATGAGACG  
ATTTACTCCGAACAGCAAAGAGCATTGACCAGATCCGACAACAAGTTTTCTCGCCAAGCTTTACGAAGAGCTATAGGAAC  
TTTGAATAGTCGTTTTG-----  
AATACTGAGTTACATTTACGTACGATCGATCACAATATTGGCCTGCTTAGAACCATGATG-----AACACA---  
AATGAT---  
ATGGATCCCTTAATTTCTGCTGCTTCCGTTATTGCTGCTGGATTATCTGTAGGGCTTGCTTCCATTGGACCTGGCGTTGG  
CCAGGGCACTGCTGCGGGCCAAGCTGTAGAAGGTATTGCGAGACAACCAGAAGCAGAAGGTAATAACGAGGTACCTTAC  
TGCTAAGTTTAGCTTTTATGGAAGCTTTAACTATTTATGGACTAGTTGTGGCCCTAGCGCTTCTATTTGCGAATCCCTTT  
GTT---ATGGATATCGTA-----CGATCTCCTATTAGCACACTG---AAT---CATATC---  
TATGAGATATCCGGTGTGGAGGTGGGTCAACATTTTATTGGCAAATAGGGGGTTTTCAAGTTCATGGACAGGTACTTCT  
AACTTCTTGGGTTGTAATTGCTGTCTTATTAGGTTTCAGTACCATAGCTGTT---  
CGAGATCCACAACCAACTTCTACCGGTGGTCAAAAATTTGTTGAATATATTCTCGAATTTTTTCGGGACTTGACCAGAAC  
TCAGATTTGGGGAGGAAGAATATGGTCCCTGGGTTCCCTTTATTGGAACATATGTTTCTATTTATCTTTGTTTCTAACTGGT  
CAGGTGCTCTTCTTCTTGGGGAATTCTAAAATTACCTCAGGGGGAGTTAGCCGCACCTACAAATGATATTAATACTACG  
GTTGCTCTAGCTTTACTTACGTACGTAGCATATTTCTATGCAGGTCTTACAAAGAAGGGGTTAGGTTATTTTGGTAAATA  
TATTCAACCAACCCCAATACTTTTACCAATTAACATCTTAGAAGATTTTACAAAACCTTTATCACTTAGTTTTCGACTTT  
TTGGAAATATATTAGCTGACGAATTGGTAGTTGCTGTTCTTGTCTTCTGTTACCTTTAATAGTTCCTATACCTGTAATG  
TTCTGGGATTATTTACGAGCGGTATTCAAGCTCTGATCTTTGCAACTCTAGCTGCAGCTTATATAGGTGAATCCATGGA  
GGGTCATCAT-----  
ATGATATTCATAACTTTAGAACATATATTGGCTCACATCTCTTTTTCTCTCATTGTTGTTGCTACTCTCATTATTGGGG  
AACC-----TTA---GTT-----  
TATCGAATTGAAGGACTAAGTAGTTCGGGAGGAAAGGGCATGATAGTTACTTTTCTTTGTACAACGGGATTATTAATTA  
TCGTTGGCTTTATTACAGGACATTTACCGTTGAGTAATTTGTATGAATCATTGTTCCCTTTCTGGAGTTCATCCGTGT  
TCCATATACTTCTAGAA-----GTACGG---  
AGTCGAGATGATCGGTGGTTAGGTGCAATCACCGCGCCAAGTGCTATGTTAACTCATGGGTTTGCTACTTTAGGTCTTCC  
GGAGGAAATGCAACGATCCGGAATGTTAGTACCCGCGCTACAATCTCATTGGTCAATGATGCATGTAAGTATGATATTGT  
TCAGCTATGCAACCCTTTTATGTGGATCCCTAGCATCCATAGCTCTTCTAGTGATTATGTCCGGAGTAAAT---  
AGACAGGTTATTTTT-----GGTGCATGGACAATTTA-----TTT---  
TCCCGAGCCATTCTTCCAATGAAAATTTTATTACAT-----GAAAAG-----CAAAAAGTGATTTG-----  
CAA-----TACACTGTT-----TATTTT-----  
TCATCAACGAATTATCGTAAATGTCAATTGATTAACAATTAGATCATTGGAGTTATCGTGCATTTGGTCTCGGTTTTTC  
TCTTTCAACCATAGGTAATCTTTCTGGAGCAATATGGCCAATGAAGCATGGGGATCTTATTGGAGCTGGGATCCAAAAG  
AGACTTGGGCATTAATTACTTGGACCATATTCGCAATCTATCTGCATACTAGAATG-----  
AATAAGGGTTGGCAGGGT-----  
GAGGAACCGCAATTGTGGCTTCTTTAGGATTTTTTATAGTTTTGGATCCGTTATTTGGGGGTCAATCTATTAGGAATAGG  
GTTACACAGCTATGGATGGTTGGAACCA-----  
ATGGATCCCATACTCATTCTATCACTCGTACTTTGTCTAGATTTTCGGACAGAAGTGAAGTGAATCAGGTTTCGTTAGC  
GATTCACGAATTGGAAGTG---TCCGAATAT-----AAAGCATCAGCTTCCCTACGA-----  
TATCTCGCATGTTTAGTAGTA-----CTGCCTTGGGTAATTCCTATTTTACATTA-----  
CGGAAAGGTTTGGAGCCTTGGGTTACAAATTGGTGAATACGGTTAAATCTCAGAAAATTTTTGATTATCTCCAGGAACA

AAATGCTCTGGGAAGATTTGAGAAAATAGAAGAACTATTCTTGTTA-----  
GAAAGAATGGTGGGAAGAT---  
TCTTTGGGAACACATTACAACTCTATTTCGTATAGAGATTACAAAAGAAACGATCCAATTGGTCGAAATGTACAATGAAGA  
TTGTATCCAGATAATATCACATTTATTAACAAATCTAATAGGTTTTGCTTTTATAAGTGCTTATATCATTCTGGGTAAGA  
ATAAACTCGCTATTATCAATTCTTGGATCCAAGAATTCTTCTATAGTCTGAGCGATACAATGAAAGCTTTTCTAATTCTT  
TTAGCAACCGATCTATGTATTGGGTTTTATTACCCCATGGTTGGGAAGTATGATGATCGATTTCGATCTCCGAAAGTTATGG  
ATTTGCCATAATGAACGA-----  
ATCATATCTGGTCTTGTTCCTTCCAGTCATCTTAGATACGATTCTTAAATATTGGATCTTCCGTCGTTTCAATCG  
TATATCTCCTTCACTTGTAGTAATTTATCATTTCGATGAATGAA-----  
ATGCCCCGTTGGTGTTCCTTCCAAAAGTGCCTTTCGAGCCCCT-----  
-----GGAGATGAAGAT-----  
--GCAACTTGGGTCGACTTATACAACCGACTTTATCGAGAGAGATTACTT---  
TTTTTGGCTCAGGATATCAATCACGAGATTGCAAATCAAC

Piper

TGTTAATGAGCAAGACGTAATTCTATTTATCGACAATATCTTCCGCTTCGTCCAAGCAGGATCAGAAGTATCTGCCCTAT  
TAGGTAGAATGCCCTCTGCTGTGGGTTATCAACCTACTCTTAGTACGGAAATGGGTTCTTTGCAAGAAAGAATTACTTCT  
ACCAAAGAAGGATCTATAACTTCCATTCAAGCAGTTTATGTACCCGCGGATGATTTAACCGACCCTGCTCCTGCTACGAC  
GTTTGCGCATTTGGATGCTACTACCGTACTATCAAGGGGATTAGCCGCGAAAGGAATCTACCCGGCAGTAGATCCTTTAG  
ATTC AACGTCAACTATGCTCCAACCCAGGATCGTTGGAGAGGAACATTATGAAACTGCACAAAGGGTTAAGCAAACCTTTA  
CAACGTTACAAGGAACCTCAGGACATTATAGCTATCCTTGGGTTGGATGAATTATCTGAAGAGGATCGTTTAAACCGTAGC  
AAGAGCACGAAAAATTGAGCGTTTCTTATCACAACCTTCTTTCGTAGCAGAAGTATTTACAGGCTCCCCGGGGAAATACG  
TCGGTCTCCAGAAACTATTAGGGGGTTTTCGATTAATCCTTTCTGGAGAATTAGATGGTCTTCCAGAACAAGCCTTTTAT  
TTGGTAGGTAACATCGATGAAGCTACCGCGAAGGCTATGAACTTAGAT-----GAGGAG---AGCAAATTAAGAAA--  
-

ATGACCTTAAATCTTTGTGTACTGACTCCTAATCGAATTATTTGGGACTCAGAAGTGAAGAAATTATTTTACCTACGAA  
TAGTGGCCAAATTGGCGTATTACCAAACACGCCCCCATGCTACAGCTGTAGATATAGGTATTTTGAGAATACGC---  
CTC-----  
GATGACCAATGGGTAACGATGGCTTTGATGGGAGGTTTCGCTAGAATAGGCAATAATGAAATCACCATTTTGGTAAATGA  
TGCAGAGAGGGGTAGTGACATTGATCTGCAAGAAGCTCAGGGAACTCTTGAAATAGCTGAAGCTAATTTGAATAAAGCTG  
AGGGCAAGAGACAAGTAATTGAGGCCAATCTTGCTCTTAGGCGAGCTAGGACACGAGTGGAGGCTGTCAATACGATTTCCG  
-----ATGAAAAATGTAACCGATTCTTTCGTTTCC---TTA---  
GGTCACTGGCCATACGCCGGGAGTTTCGGGTTT---  
AATACCGATATTTTAGCAACAAATCCAATAAATCTAAGTGTAGTGCTTGGTGTATTGATCTTTTTTGGAAAGGGAGTG--  
-----

TTAAGTGATTTATTAGATAATCGAAAACAGAGGATCTTGGAGCACTATTTCGAAATTCAGAAGAAGTACGCGGAGCAGCCAT  
TGAACAGCTCGAAAAAGCCCGAACTCGCTTGCAGAAAGTAGAAATCGAGGCAGATGAGTTTCGAGTGAACGGGTACTCTG  
AGATAGAACGCGAAAAATCAAATTTGATTAATGCCGCTTCTGAGAATTTGGAACGATTAGAAAATTATAAAAACGAAACC  
ATTCGTTTTGAACAACAAAAGCAATTAATCAGGTCGACAACGAGTTTTCCAACAAGCCTTACAAGGAGCTCTAGGAAC  
CTTGAATAGTTGTTTTG-----  
AACAAAGAGTTACATCTACGAGCTATCAGTTCTAATATTAGCATTCTCGGTGCCATGAAA-----GAAATA---  
ATGGAT---

ATGAATCCATTGATTTCTGCCGCTTCTGTTATTGCTGCCGATTGGCAGTAGGGCTTGGCTTCCATTGGACCTGGAATCGG  
TCAAGGACTGCTGCAGGCCAGGCTGTAGAAGGTATCGCGAGACAACCAGAAGCAGAAGGTAATAACGAGGACTTTTAT  
TGCTTAGTCTGGCTTTTATGGAAGCTTTAACAATTTATGGACTAGTTGTGGCATTAGCCCTTTTATTTGCAAATCCTTTT  
GTT---ATGAATGTTCTA-----CCATGTTCCATCAACACACTA---AAG---GGGCTG---  
TACGATATATCTGGTGTGGAAGTGGGTCAACACCTCTATTGGCAGATAGGGGGTTTCCAAGTTCATGGCCAAGTACTTAT  
CACTTCTTGGGTCGTAATTGCTATCTTATTAGGTTTCAGTCACTATAGCGGTT---  
CGAAATCCACAACAATTCACCAATAGCCAGAATTTCTTCAATATGTTCTCGAATTCATTGAGATTTGAGCAAAAC  
TCAGATTGGA---

GAAGATTATGGCCCTTGGGTTCCCTTTATTGGAACATGTTTCTATTCTTTTTGTTTTCGAACTGGTTCGGGTGCTCTTTT  
CCCTTGGAAAATCATAACAGTTGCCTCATGGAGAGTTAGCTGCACCCACGAATGATATAAATACTACTGTTGCTTTAGCTT  
TACCCACGTCAAGTGGCATAATTTCTATGCGGGTCTTACAAAAAAGGATTGGGTTATTTTAGTAAATACATTCAACCAACC  
CCAATACTTTTACCAATTAACGTTCTAGAAGATTTCACTAAGCCTTTATCACTTAGTTTTGCACTTTTTGGGAATATATT  
GGCTGATGAATTAGTAGTTGTTGTTCTTGTTCCTTTAGTACCTTCAGTGGTTCCCATACCTGTCATGTTTCTTGGATTAT  
TCACAAGCGGAATTCAGCTCTTATTTTTGCAACTTTAGCTGCGGCTTATATAGGCGAATCCATGGAGGGTCATCAT---  
---  
ATGATATCTATCGCTTTAGAACATGTATTAACCTCACATCTTTTTTCGATTATTTCAATTGTGATTTTCGGTTCATTTAAT

CAAA-----TTTTTA---GTT-----  
CCTGAAATCATAGGACTATGTGACTCGTTAGAAAAGGGCATAATAACTACCTCTTTTTGCATAACAGGTTTATTAATTAT  
TCGTTGGGTTTATTCAAGACATTTACCGTTAAGTAATTTATATGAATCATTAAATGTTCCCTTTCGTGGGGTTTCTCCACTA  
TTCATATATTTTCCAAA-----ATATGG---AACCATCAAAATGAT---  
TTAAGCACAATTACGGCTACAGGTGCTATTTATTGCCAAGCCTTTGCAACTTCAGGTATTTTAAATGAAATGCATCAATC  
CGCAATACTAGTACCTGCTCTACAATCTCAATGGCTAATGATGCACGTAAGTATGATGTTATTAAGTTATGGAGCCCTTT  
TGTGCGGATCCTTATTATCAGTATCTCTTTTAGTTATTACATTTGAAAAAAC---ATAGAAATCTTGGAG-----  
AAAATGAATCAATTTTCTTTT---TTA---ATTGAGTCATTTTACTTAGCGAAGTACGTCCTTTAAAA-----  
AAGAAA-----AAAAGTTTTTTA-----CAA-----AATATTTCT-----TTTCTT-----

TCATTTAAAAATTATCATAAATATCAATTTACTCAACAGTTGGATCATTGGAGTTATCGGATTATAAATCTAGGATTTAC  
TTTGTAAACCATAGGCATTCTATCAGGAGCAGTATGGGCGAACGAGGCGTGGGGATCTTATTGGAATTGGGACCCCAAGG  
AAACCTGGGCATTTATTACTTGGACTATATTCGCTACTTATTTACATACGAGAACA-----  
AATCAACGAATGCCGGGT-----  
ATGCATTCGGCAATTGTAGCTTCGATTGGATTTCTTATTATTTGGATATGTTATTTTCGGAGTAAATCTATTAGGAATAGG  
GCTACATAGTTATGGTGCATTCACCTCTAAT-----

-----GTG---CCGAAAAAG-----  
-----AAAGCATTGGCCCCGCCCCA-----TATCTTGTATCTATAGTTTTT-----  
TTACCGTGGTGGATCTCTCTTTTCATTT-----  
CAAAAAAGTCTGGAACCTTGGATTACTAATTGGTGGAAATAGCAGGAAATCCGAAACTTTTTTGAATGATATTCAAGAAAA  
GGGCGTTCTAGAAAAATTCATAGAATTAGAGGAACTACTTCTGCTA-----  
GACGAAATAACAAAAGAG---

TGCCCCGAAACACAGATACAAAAGCTTTATATAGGAATATACAAAAGAAACGATTCAATTGGTGAAAATTAATAATGAAGA  
GCATATCCATATTATTTTACAGATTTTCGGCGAATATAATCTGTTTTGCTACTCTAAGTGGCTATGCTATTCTATGTAATG  
AAGAACTTGTGATTGTGAATCTTGGATTTCAGGAATTCCTATATAACTTAAGCGACACAATAAAGGCTTTTTTCTATTCTT  
TTAGTAACGGACTTATGTATTGGATTCCACTCACCCCATGGTTGGGAGCTAATGATTGGTTCGGTCTACAAAAGATTTTGG  
ATTTGCTCATAATGAGCAA-----  
ATTATATCTGGTCTTGTCTTACCTTTCCAGTCATTCTAGATACAATTTTGAATATTGGATCTTTCATTATTTAAATCG  
TGTATCTCCTTCACTTGTAGTGATTTATCATTCAATGAATGAA-----  
ATGCCCATTTGGTGTTCAAAAGTACCTTTTCGGAGTCCT-----  
-----GGAGAGGAAGAC-----  
--GCGGCTTGGGTTGACGTATACAACCGACTTCATCGAGAAAGATTACTT---  
TTTTTAGGTCAAGAAGTTGATAGTGAGATCTCGAATCAAA

Platanus

TGTTAATGAACAAGACGTACTTCTATTTATCGACAATATCTTCCGTTTCGTCCAAGCAGGATCCGAAGTATCTGCTTTAT  
TAGGCAGAATGCCTTCTGCTGTGGGTTATCAACCTACCCTTAGTACAGAAATGGGTTCTTTGCAAGAAAGAATTACTTCT  
ACAAAAGAAGGATCCATAAATTCTATTCAAGCAGTTTATGTACCCGCGGATGATTTGACCGACCCTGCTCCTGCCACGAC  
ATTTGCACATTTAGATGCTACTACCGTACTATCAAGAGGATTAGCTGCCAAAGGTATCTATCCAGCAGTGGATCCTTTAG  
ATTC AACGTCAACTATGCTCCAACCTCGGATCGTTGGTGAGGAACATTATGAAACTGCGCAAAGAGTTAAGCAAACCTTTA  
CAACGTTACAAAGAGCTTTCAGGACATTATAGCTATCCTTGGGTTGGACGAATTATCCGAAGAGGATCGTTTAAACCGTAGC  
AAGGGCACGAAAAATTGAGCGTTTCTTATCACAACCTTCTTTCGTAGCAGAAGTATTTACCGGTTCTCCAGGGAAATATG  
TTGGTTTAGCAGAAACAATTAGGGGGTTTCAACTGATCCTTTCCGGAGAATTAGATGGTCTTCTGAGCAGGCCTTTTAT  
TTGGTAGGTAACATCGATGAAGCTACCGCGAAGGCTATGAACCTAGAA-----GTGGAG---AGCAAATTGAAGAAA--

ATGACCTTAAATCTTTGTGACTGACTCCTAATCGAATTGTTTGGGATTCAGAAGTGAAGAAATTTATTTATCTACTAG  
TAGTGGCCAAATTGGCGTATTACCAAATCACGCCCTATTGCCACAGCTGTAGATATAGGTATTTTGGAGAATACGC---  
CTT-----  
AACGAACAATGGTTAACGATGGCTCTGATGGGCGGTTTCGCTAGAATAGGCAATAATAAGATCACCATTTTGTAAACGA  
TGCGGAGAAGGGCAGTGACATTGATCCGCAAGAAGCTCAGCGAACTCTTGAAATAGCTGAAGCTAACTTGGAGTAGAGCTG  
AAGGCAAGAGACAAACAATTGAGGCAAATCTAGCTCTCAGACGGGCTAGGACGCGAGTAGAGACTATCAATGTAATTTCC  
TAA-----ATGCAAAATTTAACCGATTCTTTCGTTTCC---TTG---  
GGTCACTGGCCATCCGCCGGGAGTTTCGGGTTT---

AATACCGATATTTTAGCAACAAATCCAATAAATCTAAGTGTAGTGCTCGGTGTATTGATCTTTTTTGGAAAGGGAGTG--  
-----  
TTAAGTGATTTATTAGATAATCGAAAACAGAGGATCTTGAGTACTATTTCGAAATTCAGAAGAACTACGTGGAGGGCCAT  
TGAACAGCTGGAAAAAGCCCGGGCCCGCTTACGGAAAGTGGAAATGGAAGCAGATGAGTTTCGAGTGAATGGATACTCTG  
AGATAGAACGAGAAAAGTTGAATTTGATTAATTCGACTTATAAGAATTTGGAACGATTAGAAAATTACAAAATGAACC

ATTCAGTTTGAACAACAAAGAGCGATTAATCAAGTCCGACAACGAGTTTTTCAACAAGCCTTACAAAGAGCTCTAGGAAC  
TCTGAATAGTTGTTTTG-----  
AACAAACGAGTTACATTTACGCACCATCAGTGCTAATATCGGCATGTTCCGGGACGATGAAA-----GAAATA---  
ACCGAT---  
ATGAACCCACTGATTTCTGCCGCTTCCGTTATTGCTGCTGGATTGGCCGTAGGGCTTGCTTCTATTGGACCTGGAGTTGG  
TCAAGGTACTGCCGCGGGCCAAGCCGTAGAAGGTATCGCGAGACAACCAGAGGCAGAGGGTAAAATACGAGGTACTTTAT  
TGCTTAGTCTGGCTTTTATGGAAGCTTTAACAATTTATGGACTGGTTCGTGGCATTAGCGCTTTTATTTGCGAATCCCTTT  
GTT---ATGAATGTTCTA-----CCATGTTCCATCAACACACTA---AAA---GGGTTA---  
TACGATATATCCGGTGTGGAAGTAGGCCAACATTTCTATTGGCAAATAGGGGGTTCCTCAAGTCCATGCCCAAGTACTTAT  
TACTTCTTGGGTGCTAATTGCTATCTTATTAGGGTCAGCCACTGTAGCTGTT---  
CGGAATCCACAACCAATTTCCGACCGACGGTCAGAATTTCTTTGAATATGTCCTTGAATTCATTGAGACTTGAGCAAAAC  
TCAGATTGGA---  
GAAGAATATGGTCTTGGGTTCCTTTTATTGGCACTATGTTCCATTTATTTTTGTTTTCTAACTGGTCAGGGGCTCTTTT  
ACCTTGGAAAATCATAACAGTTACCTCATGGGGAGTTAGCCGCACCTACGAATGATATAAAATACTACTGTTGCTTTAGCTT  
TACCCACGTCAGTGGCATATTTCTATGCGGGTCTTACCAAAAAAGGATTGGGTTATTTCCGGTAAATACATTCAACCAACT  
CCAATCCTTTTACCAATTAACATTCTAGAAGATTTACAAAACCTTTATCACTTAGTTTTCGACTTTTCCGGGAATATATT  
GGCTGATGAATTAGTAGTTGTTGTTCTTGTCTTTAGTACCTTCGGTGGTTCCTATACCTGTTATGTTCCCTTGGATTAT  
TTACAAGTGGTATTCAAGCTCTTATTTTTGCAACTTTAGCTGCCGCTTATATAGGCGAATCCATGGAGGGTCATCAT---  
---  
ATGATATTTTTGACTTTAGAACATATATTCACTCATATCTCTTTTTTCGATCGTTTTCAATTGTGATTACGATTCATTTGAT  
GACC-----CTATTA---GTC-----  
GATGGAATCGTAGGACTATATGATTCGTCAGAAAAAGGCATGATAGCTACTTTTTTATGTATAACAGGATTTTTTAGTTAC  
TCGTTGGATTTATTCGAGACATTTCCCATTAAGTGATTTATATGAATCATTAAATATTCCTTTTCATGGAGTTTCTCCATTA  
TTCATATGGTTCCTAAA-----ATACGG---AATCATAAAAATCAT---  
TTAAGCGCAATAACCGCGCCAAGCGCTATCTTTACCCAAGGCTTTGCCACTTCAGGTCTTTTAACTGAAATGCATCAATC  
CGCAATATTAGTACCTGCTCTCCAATCCCAGTGGTTAATGATGCACGTAAGTATGATGGTATTGAGCTATGCAGCTCTTT  
TATGTGGATCATTATTATCAATAGCCCTTCTAGTCATTAGATTTCGAAAAAAC---ATAGAGATTTTTGGT-----  
AAAGACAATTATTTA-----TTA---ATTGGGTCAATTTCCCTTTGGTGAGAGCCAATACGTGAAT-----  
GAAAGA-----AGCAATATTTTA-----CGA-----AACACCTCT-----TTTCTT-----  
-  
TCCTTTAGAAATTATTACAGATATCAATTAATTCAGCAATTGGATCATTGGAGTTATCGTGTCTATTAGTCTAGGATTTAT  
CTTTTTAACTATAGGTATTCTTTTCAGGAGCAGTATGGGCTAATGAGGCGTGGGGGGCGTATTGGAATTGGGACCCCAAGG  
AAACTTGGGCATTTATTACTTGGACCATATTTGCGATTTATTTACATACTCGAACA-----  
AATAAAGATTTGCAAGGT-----  
GCGAATTCGCAATTGTGGCTTCTATAGGATTTTTGATAATTTGGATATGCTATTTTTGGGGTCAATCTATTAGGAATAGG  
TTTACATAGTTATGGTTCATTACATTAACATCGAAT-----  
-----ATG---CCAAAAAG-----  
-----AAAGCATTCACTCCCCTCCA-----TATCTTGCATCTATAGTATTT-----  
TTGCCCTGGTGGATCTCTCTCATT-----  
AATAAAAAGTCTGGAATCTTGGATTACTAATTGGTGGAAATACTAGGCAATCCGAAATTTTTTTGAATGATATTCAAGAAAA  
AAACGTTCTAGAAAAATTTATAGAATTAGAAGAACTATTCCTGTTG-----  
GACGAAATGATAAAGGAG---  
TACCCGGAGACACATATACAAAAGCTTCGTATAGGAATACACAAAAGAAACGATAGAATTGGTCAAAATACACAATGAGGG  
TCATATCCATACTATTTTGCACCTTCTCGACAAATATAACCTGTTTCGCTATTCTAAGTGGTTATTCTATTCTGGGTAATG  
AAGAACTTGTCACTTCTTAATTTCTTGGCTTCAGGAATTCCTATATAATTTAAGCGACACAATAAAAGCTTTTTCTATTCTT  
TTATTAACCGATTTATGTATTGGATTCCACTCGCCCCATGGTTGGGAACATAATGATTAGCTCTGTCTACAGAGATTTTGG  
ATTTGCTCATAACGATCCA-----  
ATTATATCTGGTCTTGTTTCCACTTTTCCAGTGATTCTAGATACAATTTTTAAATATTGGATTTTTCGTTATTTAAATCG  
CGTATCTCCGTCACCTGTAGTGATTTATCATTCAATGAATGACTAA-----  
ATGCCATTGGTGTTCCTAAAAGTCCCTTTTCCGGAGTCT-----  
-----GGAGAGGAAGAT-----  
--GCGATTTGGGTTGACGTATACAACCGACTTCATCGCGAAAGATTACTT---  
TTTTTAGGCCAAGAGGTTGATAGCGAGATCTCGAATCAAC  
Populus  
TGTTAATGAACAAGACGTACTTCTATTTATCGACAATATCTTTTCGTTTCGTCCAAGCAGGATCCGAAGTATCCGCCTTAT  
TGGGTAGAATGCCCTCTGCTGTGGGTTATCAACCCACCCTTAGTACCGAAATGGGTACTTTACAAGAAAGAATTACTTCT  
ACCAAAGAAGGGTCCATAACTTCTATTCAAGCAGTTTATGTACCTGCGGACGATTTAACCGACCCTGCTCCTGCCACGAC

ATTTGCGCATTAGATGCTACTACTGTACTATCAAGAGGATTAGCTGCTAAAGGTATCTATCCAGCAGTCGACCCTTTAG  
ATTCAACATCAACTATGCTCCAACCTCAGATCGTTGGCGAGGAACATTATGAAACTGCGCAAAGAGTTAAGCAAACCTTTA  
CAACGTTACAAAGAAGCTTCAAGACATTATAGCTATCCTTGGGTTGGACGAATTATCCGAAGAGGATCGCTTAACTGTAGC  
AAGAGCACGAAAAATTGAGCGTTTCTTATCACAACCTTTTTTCGTAGCCGAAGTATTTACCGGTTCCCGGGAAAAATATG  
TCGGTCTAGCAGAAACAATTAGAGGGTTTTAAATTGATCCTTTCCGGAGAATTAGATAGTCTTCTGAGCAGGCCTTTTAT  
TTGGTAGGTAACATTGATGAAGCTACTGCGAAGGCTACGAACTTAGAA-----ATGGAG---AACAACTTGAAGAAA--  
-  
ATGATCTTAAGTCTTTGTGTATTGACCCCGAATCGAATTGTTTGGGATTCAGAAGTGAAAGAAATCATTTTATCTACTAA  
TAGTGGGCAAATTTGGTGTATTACCTAATCACGCGCCTATTGCCACAGCCGTTGATATCGGTATTTTGAGAATACGC---  
CTT-----  
AATGACCAATGGTTAACGATGGCTCTGATGGGCGGTTTTGCTAGAATAGGCAATAATGAGGTTACTGTTTTAGTAAATGA  
TGCGGAGAAGGGGAGTGACATTGATCCACAAGAAGCTCAGCAAACCTTTGAAATAGCAGAAGCTAACTTGAGGAAAGCGG  
AAGGCAAGAGACAAATAATCGAGGCAAATCTAGCTCTCAGACGAGCTAGAGCACGAGTAGAGGCTATCAATGTGATTTCC  
-----ATGAAAAATATAACCGATTCTTTCGTTTCC---TTG---  
GGTCACTGGTCATCCGCCGGGAGTTTCGGGTTT---  
AATACCGATATTTTAGCAACAAATCCAATAAATCTAAGTGTAGTCCTTGGTGTATTGATTTTTTTTTGGAAAGGGAGTG--  
-----  
TTAAGTGATTTATTAGATAATCGAAAACAGAGAATTTTGAATACTATTTCGAAATTCAGAAGAAGTACGCGGAGGAGCCAT  
TGAACAGTTGGAAAAAGCCCGGGCCCGCTTACGGAAAGTGGAAATAGAAGCGGATCAATTTTCGAGTGAACGGATACTCTG  
AAATAGAACGAGAAAAATTGAATTTGATTAATTTCAACTTATAAGACTTTGGAACAATTAGAAAATTACAAAAACGAAACC  
ATTCATTTTGAACAACAAAGAGCGATTAATCAAGTTCGACAACGGGTTTTCCAACAAGCCTTACAAGGAGCTCTAGGGAC  
TTTGAATAGTTGTTG-----  
ACCAACGAGTTACATTTACGTACTATTAGTGCCAATATTGGCATGTTGGGGCAATGAAA-----GAAATA---  
ACTAAT---  
ATGAATCCATTGATTTCTGCCGCTTCCGTTATTGCTGCTGGGTTGGCCGTTGGGCTTGCTTCTATTGGACCTGGGGTTGG  
TCAAGGTACTGCTGCGGGCCAAGCTGTAGAAGGTATCGCGAGACAACCCGAGGCAGAGGGGAAAAATACGAGGTACTTTAT  
TGCTTAGTCTGGCTTTTATGGAAGCTTTAACAATTTATGGACTGGTGTAGCATTAGCACTTTTATTTGCGAATCCTTTT  
GTT---ATGAATGTTCTA-----TCATATTCATTAAACACATTA---AAA---GGGTTA---  
TATGAAATATCTGGTGTGGAAGTAGGCCAGCATTTCTATTGGAAAAATAGGCGGTTTTCCAAGTCCATGCCCAAGTACTTAT  
TACTTCTTGGGTTGTAATTGTTATCTTATTAGGTTTCAGCCATTGTAACCTGTT---  
CGGAATCCACAAACCATTCTACTGACGGTCAAGATTTCTTCGAATATATCCTTGAATTTATTTCGAGATGTGAGCAAAAC  
CCAGATTGGA---  
GAGGAATATGGTCCATGGGTTCCCTTTATTGGAACCTTTGTTTCTATTTATTTTTGTTTCTAATTGGTCAGGGGCGCTTTT  
ACCTTGGAAAATCATAGAGTTACCTCATGGGGAGTTAGCCGCACCCACGAATGATATAAATACTACCGTTGCTTTAGCTT  
TACTTACGTCAATAGCATATTTTTATGCGGGCCTTAGCAAAAAGGATTAGGTTATTTTCGGTAAATACATACAACCAACT  
CCAATCCTTTTACCCATTAACATTTTAGAAGATTTACAAAACCTTTATCACTTAGCTTTTCGACTTTTGGAAATATATT  
AGCGGATGAATTAGTAGTTGTTGTTCTTGTTCCTTTAGTACCTTCAGTGGTTCCTATACCTGTCTATGTTCCCTTGGATTAT  
TTACAAGTGGTATTCAAGCTCTTATTTTTGCAACTTTAGCTGCGGCTTATATAGGTGAATCCATGGAGGGACACCAT---  
---  
ATGATATTTTTGACTTTAGAACATATATTAACCTCATATATCTTTTTCGGTGCTTTCAATTGTAATTATAATTCATTTTCT  
AACC-----TTATTA---GTC-----  
AATGAATTCGTGGGACTCTATGATTCGTCAAGAAAAGGCATGTTAACTACTTTTTTCTGCCTAACAGGATTACTAATTAC  
TCGTTGGATTTATTCGGGACATTTACCAATAAGTGATTTATACGAATCATTAAATTTCTTTCATGGATTTTCTCTATTA  
TTCATATGGTTCATAT-----TTTAAA---AACATAAAAATTAT---  
TTAAGCACAATAACCGCACCAAGTACTTTTTTACCCTAAGGCTTTGCTACTTGGGGTCTTTTAAACCGACATGCATCAATC  
TAAAATCTTAGTACCTGCTCTCCAATCCCAGTGGTTAATAATGCACGTAAGTATGATGGTATCGGGCTATGCAGCTCTTT  
TGTGTGGATCATTATTGTGAGCAGCACTTCTAGTAATTACATTTTCGAAAAGTC---ATAAGAATTGTTGGT-----  
AAAAACAATAATTTA-----TTA---AATGATTCATTTCCCGTTGATGAGATCCAATACATGATG-----  
GAAAAA-----AAAAGTATTTTA-----AAA-----AATACTTTT-----TTTCT-----  
-  
TCTTCTAGGAATTATTACAGGTTTCAATTGATTCAACAATTAGATCATTGGGGTTTTTCGTATTCTTAGTATAGGGTTTCT  
TTTTTTAACCATAGGTATTCTTTTCAGGAGCAGTCTGGGCTAATGAAGCATGGGGATCATATTGGAATTGGGACCCAAAAG  
AAACTTGGGCATTTATTACTTGGACCATATTCGCGATTTATTTCCATACTCGAACA-----  
AATAAGAATTTGGAAGGT-----  
TTAAATTCGCAATTGTCGCTTCTATCGGTTTTCTTATAATCTGGATATGCTATTTTGGGGTTAATTTATTAGGAATAGG  
ACTACATAGTTATGGTTCATTTACATTAATATCTAAT-----  
-----ATG---GAAAAA-----

-----AAAGCATTTCATTCCCCTTCTA-----TATCTTACGTCTATAGTATTT-----  
TTGCCCTGGTGGGTCTCTTTTTTCATTT-----  
AATAAAAGTCTGGGATCTTGGATTATTAATTGGTGGAACTACTAGTAAATCCGAACTTTTTTAAATGATATTCAAGAAAA  
GAGTATTCTAGAAAAATTAATAGAATTTGAGGAACTCTTCCTGTTG-----  
GACGAAATGATAAAGGAA---  
TACCCCGAAACACATCTACAAAAGTTTTCGTATCGGAATCCACAAAGAAACGATCCAATTGATCAAGATGCACAACGCAGA  
TCGTATAGATACGATTTTGCACCTTCTCGACAAATATAATCTGTTTCGTTATTCTAAGTGGTTATTCTTTTTTAGTTAATG  
AAGAACTTTTTATTCTTAATTCTTGGGTTCAGAATTCATATATAACTTAAGCGACACGATAAAAGCCCTTTCTATTCTT  
TTATTAACCGACTTATGTATAGGATCCATTACCCCCACGGTTGGGAACTAATGATTAGCTCTTTCTACAAGGATTTTGG  
ATTTGCTCATAATGATCAA-----  
ATTATATCTGGACTTGTTTCCACCTTTCCAGTAATTTTCGATACAATTTTTTAAATATTGGATCTTCCGTTATTTAAATCG  
TGTATCTCCGTCACCTTGTAGTGATTTATCATTCAATGAATGAC-----  
ATGCCTATTGGTGTTCAAAAGTCCCTTTTCGAAATCCC-----  
-----GGAGAGGATAGT-----  
--TCAAATTGGATTGACGTATACAACCGACTTTATCGAGAAAGATTACTT---  
TTTTTAGGTCAAGATATTGATAGTGAGATCTCGAATCAAC  
Ranunculus  
TATTAATGAACAAGACGTACTTCTATTTATCGATAATATTTTCCGTTTCGTCCAAGCAGGATCCGAAGTATCCGCTTTAT  
TAGGAAGAATGCCTTCCGCTGTAGGTTATCAACCTACTCTTAGTACAGAAATGGGTTCTTTGCAAGAAAGAATTACTTCT  
ACCAAAGAGGGATCCATAACTTCTATTCAAGCAGTTTATGTACCTGCGGACGATTTGACCGACCCTGCCCTGCCACAAC  
ATTTGCGCATTTAGATGCAACTACCGTACTATCAAGAGGACTGGCTGCCAAAGGTATCTATCCAGCAGTGGATCCTTTAG  
ATTC AACGTCAACTATGCTTCAACCTCGAATTGTTGGTGGGAAACATTATGAAACTGCGCAAAGAGTTAAGCAAACCTTCA  
CAACGTTACAAAGAACTTCAGGACATTATAGCTATCCTTGGGTTGGACGAATTGTCCGAAGAGGATCGTTTAAACCGTAGC  
AAGAGCACGAAAAATTGAGCGTTTCTTATCACAACCTTCTTCGTAGCAGAAGTTTTTACCGGTTCTCCAGGTAATATG  
TTGGTCTAACAGAAACAATTAGGGGTTTTCAATTGATCCTTTCCGGAGAATTAGATGGTCTTCCGGAACAGGCCTTTTAT  
TTGGTAGGTAATATCGACGAAGCTACCGCGAAGGCTATAAACTTAGAT-----GAGGAG---AGCAAATCGAAGAAA--  
-  
ATGACCTTAAATCTATGTGTACTGACTCCTAATCGAATTGTTTGGGATTGAGAAGTGAAGAAATCATTTTTATCGACTAA  
TAGCGGTCAAATTGGTGTATTACCAAATCACGCACCTATTGCCACGGCTGTAGATATAGGCATTTTGAGAATACGT---  
CTT-----  
AACGACCAATGGTTAACCGTAGCTCTGATGGGCGGTTTTCGCTAGAATAGGTAATAATGAAATAACCATTTTTAGTAAATGA  
TGCAGAGAGGGGCAGTGACATTGATCCGCAAGAAGCTCAGCAAACCTTTGAAATAGCTCAAGCTAACTTGAGTAGCGCGG  
AAGGCAAGAGACAAACAATCGAGGCAAATTTAGCTCTCAGACGAGCTAGGACGCGGGTAGAGGCTATCAATGCAATT---  
-----ATGAAAAAAGTAACCGATTCTTTTCGTTTCC---TTG---  
GGTCACTGGCCATCCGCCGGGAGTTTCGGATTT---  
AATACCGATATTTTAGCAACAAATCCAATAAATCTAAGTGTAGTCTTGGTGTATTGATTTTTTTTTGGAAAGGGAGTGTG  
TGCGAGTTGTTTA---  
TTAAGTGATTTATTAGATAATCGAAAACAGAGAATCTTGAGTACTATTCGAAATTCGGAAGAGCTGCGCGGAGGGGCCAT  
TGAAAAGCTGGAAAAGCCAAGGCCCGCTTACGAAAAGTAAAAGCGGAAGCGGATGAGTTTCGAACGAATGGATACTCCG  
AGATAGAACGAGAAAAATGTAATTTGATTAATTCAACTTATCAGAATTTGGAACGATTAGAAAATTACAAAAATGAAACC  
ATTCAGTTTGAACAACAAGAGCGATTAATCAAGTTAGACAACGCATTTTTCAACAAGCTCTACAAGGAGCTCTAGGAAC  
TCTGAATAGTTGTTG-----  
AACACGAGTTACATTTACGCACCATCAGCGCAATATTGGTATGTTTGGGGCGATGAAA-----GAAATA---ACG--  
-----  
ATGAATCCACTGATTTCTGCCGCTTCCGTTATTGCTGCTGGATTGGCTGTAGGGCTGGCTTCTATTGGACCTGGAGTTGG  
TCAAGGTACTGCTGCGGGACAAGCCGTAGAAGGTATTGCGAGACAACCAGAGGCAGAGGGTAAAATACGAGGTACTTTAT  
TGCTTAGTCTGGCTTTTTATGGAAGCTTTAACAATTTATGGACTGGTCTGGCATTAGCGCTTTTTATTTGCAAATCCCTTT  
GTT---ATGAATGTTCTA-----CCATGTTCCGTCAACACACTA---AAA---GGGTTA---  
TATGATATATCCGGTGTAGAAGTAGGCCAACATTTCTATTGGCAAATAGGGGGTTTTCCAAGTCCATGCCCAAGTACTTAT  
TACTTCTTGGTTGCTAATTGCTATCTTATTAGGTTCCGCTATTATAGCTGTT---  
CGCAATCCACAAACCATTCCAACCGACGGTCAGAATTTTTTTGAAATATGTCCTTGAATTCATTTCGAGATTTGAGCAAAAC  
CCAAATTGGA---  
GAAGAGTATGGTCTTGGGTTCCTTTTATTGGAACATGTTCTTATTTATTTTTGTTTCCAACCTGGTCAGGGGCTCTTTT  
ACCTTGGAAAATCATACAATTACCTCATGGGGAGTTGGCCGCACCCACGAATGATATAAATACTACTGTTGCTTTAGCTT  
TACCTACGTCAGTAGCATATTTCTATGCGGGTCTTACAAAAAAGGATTGGGTTATTTCCGTAATATATTCAACCAACT  
CCAATACTTTTACCAATTAACATCTTAGAAGATTTACAAAACCTTATCATTAGTTTTTCGACTTTTTGGTAATATATT  
GGCTGATGAATTAGTAGTTGTTGTTCTTGTTCCTTTAGTACCTTCAGTAGTTCCTATACCTGTTATGTTCTTGGATTAT



TTACAAGTGGTATTCAAGCTCTTATTTTTGCAACTTTAGCCGCGGCTTATATAGGGGAATCCATGGAGGGTCATCAT---  
---  
ATGATATTTTTTACTTTAGAACACGTATTAACCTCACATTTCTTTATCGATTATTTAATTGTAATTACAATTTTTTTGAT  
GAAC-----TTATTA---GTC-----  
TACGAAATTGAAGGGCTATCCTATTCGTCGGAAAAAGGAATGGTAGCTTCTTTTTTATGTATAACGGGATTGTTAGTTAT  
TCGTTGGATTTATTCGGGACATTTACCCTTAAGTGATTTATATGAATCATTAAATGTTTCTTTTCATGGAGTTTCTCAATTT  
TTTATATGATTCCCTTAT-----TTTAGA---AATAAAAAAGTAAT---  
TTAAATGTATTAACAGCGCCCGGTACTATTTTTACCCAAGGGTTTGCACCTTCAGGTGTTTTAAGAGAAATACATCAATC  
TACAATATTAGTACCTGCTCTACAATCACAGTGGTTAATGATGCACGTAAGTATGATGGTATTGAGTTATGCGGCGCTTC  
TGTGTGGATCATTATTATCAGTAGCCCTTCTAGTCATTCTATTTGAAAAAGT---AGTTTTACTTTTTTCG---  
AAATATAAGGGCTATTATTTA-----CCG---ATTGGGCCGCTTTACTTTAGTGAAATCCAATATGTGAAT-----  
-GAAAAA-----AAAAATATTTTT-----CTT-----  
--  
TCGTTTAGAAATTATCACAGGTATCAATTAATTCAGCAATTGGATTGTTGGAGTTCACGTGTTATTAGTCTCGGCTTTTT  
ATTTTTAACCATAGGTATTCTTTCTGGAGCAGTATGGGCTAATGAAACATGGGGGTCGTATTGGAATTGGGATCCAAAAG  
AACTTGGGCATTTATTACTTGGACAATATTCGCAATTTATTTACATACCAGAACA-----  
AATAAAAGTTTTGCAAAGC-----  
TCAAATTCGGCAATTGTTGCTTCTATCGGTTTTTTTATAATTTGGATATGCTATTTTGGAGTAAATCTATTAGGAATAGG  
GCTGCATAGTTATGGTTCATTTGCAATAACA-----  
-----ATG---CAAAAAAA-----  
-----AAAGCATTAAACCCCTTCTA-----TACCTTACATCTATAGTCTTT-----  
TTGTCCTGGTCGATTTCTTTCTCATT-----  
AAAAAAGTATGGAATCTTTGGTTATTCATTGGTGGGAATGCAGAGCAATCCGAAGTTTTTTTGAATGATATTCAAGAAAA  
AAGCGCCCTAGAAAAATTCATAGAATTAGAAGAACTCCTCTTTTTG-----  
GATGAAATGATAAAGGAG---  
TCCCGGATATACATATACAAAACTTCGCATAGGAATACACAAAGAAACGATACAATTGGTCAAAATGTACAATGAGGG  
CCATATCCATACCATTTAACTTTTTGACAAATATAATAAGTTTTCGCTATTCTAAGCGTTTTTTATATTCTGGGTAATG  
AACAACCTGTTATTTTAAATCTTTGGGTTTCGTGAATTTATATATAACTTAAGTGATACAATAAAAGCTTTTTGTATTCTT  
TTATTAACCTGATTTATGTATTGGATTCCACTCGCCTCATGGTTGGGAACAAATGATCGGTTCTGTCTACAAGGATTTGG  
ATTTTCTCATAATAATCAA-----  
ATTATATCCGGTCTTGTTTTCCACCTTTCCAGTTATTCTAGATACAATTTTTAAATATTTAATCTTCCGTTATTTAAATCG  
TGTATCTCCGTCACCTTGATGTCATTTATCATTCAATAAATGAC-----  
ATGCCTATTGGTGTTCCAAAGTACCTTTTCGGATTCCC-----  
-----GGAGAGGAAGAT-----  
--GCAGTTTGGGTTGACGTA---AACCGACTTCATCGAGAAAGATTACTT---

Spinacia

TGTTAATGAACAAGACGTACTTCTATTTATTGACAATATCTTCCGTTTCGTCCAAGCAGGATCTGAAGTATCTGCCTTAT  
TGGGTGCAATGCCTTCCGCTGTGGGTTATCAACCTACTCTTAGTACCGAAATGGGCTCGTTACAGGAAAGAATTACTTCT  
ACAAAAGAAGGGTCCATAACTTCGATTCAAGCAGTTTATGTACCTGCGGACGATTTGACCGATCCCGCTCCTGCTACGAC  
ATTTGCACATTTAGATGCTACTACCGTACTATCAAGAGGATTGGCCGCCAAAGGGATCTATCCAGCAGTAGATCCGCTAG  
ATTCACGTCAACTATGCTCCAACCTAGGATCGTTGGCGAGGAACATTATGAAATTGCGCAAAGAGTTAAGGAAACCTTA  
CAACGTTACAAAGAACTTCAGGACATTATAGCTATCCTTGGTTTGGACGAATTATCCGAAGAAGATCGTTTAACTGTAGC  
AAGAGCACGAAAAATTGAGCGTTTCTTATCACAACCCTTTTTTCGTAGCAGAAGTATTTACAGGCTCTCCAGGAAAATATG  
TTGGTCTAGCAGAAACAATTAGAGGGTTTCAATTGATCCTTTCCGGAGAATTAGACAGTCTTCTGAACAGGCTTTTTAT  
TTGGTAGGTAACATCGACGAAGCTACCGCGAAAGCTATGAACCTTAGAA-----ATGGAG---AGCAAATTAAGAAA--  
-

ATGACCTTAAATCTTTGTGTAAGTACTGACTCCGAATCGAAGTATTTGGAATTCAGAAGTAAAAGAAATCATTTTATCTACTAA  
TAGTGGCCAAATTTGGCGTATTACCAAACCATGCCCTACTGCCACAGCGGTAGATATAGGAATTTAAGAATACGC---  
CTT-----

AACGACCAATGGTTAACATTGGCTCTGATGGGCGGTTTTGCTAGAATAGGCAATAATGAGATTACTATTTTAGTAAATGA  
TGCTGAGAGGGGTAGTGACATTGATCCCAAGAAGCCCAACAACTCTTGAAATAGCAGAAGCTAACTTGAGGAAAGCGG  
AAGGAAAGAGACAAAAAATTGAAGCAAATTTAGCTCTCAGACGAGCTAGGACACGAGTTCGAGGCTAGCAATACGATTTCT  
TCG-----ATGAAAAATGTAACCGATTCTTTTCGTTTTT---TTG---

GGTCACTGGCCATCCGCCGGGAGTTTCGGGTTT---

AATACCGATATTTTAGCAACAAATCTAATAAATCTCAGTGTAGTGCTTGGTGTATTGATCTTTTTTGGAAAGGGAGTG--  
-----

TTAAGTGATTTATTAGATAATCGAAAACAGAGGATCTTGAATACTATTTCGAAATTCAGAAGAAGCTACGCGGAAAGGCCAT  
TGAACAGCTGGAAAAAGCCCGGGCTCGCTTAAAGAAAGTCGAAATGGACGCGGATCAGTTTTCGAGTGAATGGATATTCTG  
AAATAGAACGAGAAAAGATGAATTTGATTAATTTCAACTTATAAACTTTAGAACAATTTGAAAATTACAAAAACGAAACC  
ATTCAGTTTTGAACAACA AAAAGCGATTAATCAAGTCCGACAGCGGGTTTTCCAACAAGCCTTACAAGGAGCTCTAGGAAC  
TCTGAATAGTTGTTTTG-----  
ACAATGAGTTACATTTACGGACCATCAATGCTAATATTGGCATGTTTGGTGCATGAAC-----GAAATA---  
ACTGAT---  
ATGAATCCACTGATTGCTGCCGCTTCCGTTATTGCTGCTGGATTGGCTGTAGGGCTTGCTTCTATTGGACCTGGAGTTGG  
TCAAGGTACTGCTGCGGGACAAGCTGTAGAAGGTATTGCGAGACAGCCCGAAGCAGAAGGAAAAATACGAGGTACTTTAT  
TACTTAGTTTTAGCGTTTTATGGAAGCTTTAACAATTTATGGATTGGTTGTAGCATTAGCGCTTTTTATTTGCGAATCCTTTT  
GTT---ATGAATGTTCTA-----TCATATTTCAATCAACCCGCTA---AAG---GGTTA---  
TATGCTATATCGGGTGTGGAAGTAGGTCAACATTTTTATTGGCAAATAGGAGGTTTTCCAATCCATGGCCAGGTCCTTAT  
AACTTCTTGGGTTGTAATTGCTATCTTATTAGGTTTCAGCTGCTATAGCTGTT---  
CGGAGTCCGCAAACAATTCCGACTGGTGGTCAAAATTTTTTTGAAATATGTCCTTGAATTCATCCGAGACGTGAGCAAAAC  
TCAAATTGGC---  
GAAGAATATCGCCCGTGGGTTCCCTTTATTGGGACTATGTTTCTATTTATTTTTGTTTCTAATTGGTCAGGGGCTCTTTT  
ACCTTGGAAAATCATAACAGTTACCTCATGGGGAGTTAGCCGCACCCACGAACGATATAAATACTACTGTTGCTTTAGCTT  
TACTCACGTCAGTAGCCTATTTCTATGCAGGTCTTACAAAAAAGGATTAGGTTATTTTTGGTAAATACATTCAACCAACT  
CCAATTTCTTTTACCCATTAACATCTTAGAAGATTTACAAAACCGCTATCACTTAGTTTTCGACTTTTCGAAATATATT  
AGCGGATGAATTAGTAGTTGTTGTTCTTGTCTTTAGTACCTTTAGTGGTTCCCTATACCTGTCATGTTTCTTGGCTTAT  
TTACAAGTGGTATTACAGGCTCTTATTTTTGCAACTTTAGCCGCAGCTTATATAGGCGAATCCCTGGAAGGTCATCAT---  
---  
ATGATATTTTCTACTTTAGAGCATATTTTAACTCATATTTCTTTTTCAACGGTTTCCGTTGTAATTACACTCCATTTGAT  
AACT-----TTATTA---GTC-----  
AATGAAATAGTGGGACTATATAATTCATTAGAAAAGGCATGCTAGTTACTTTTTCTGTATAACAGGATTATTAGTTAC  
TCGTTGGGTTTTATTGGAAGCATTTCCCATTAAGTGTCTATATGAATCATTAACTTCCCTTTCCCTGGAGTTTCTACCTTA  
TTCATATGATTCCATCT-----TTTTTAAAAAAGAGAAAAATTCT---  
TTAAATGTAATAACTGCACCAAGTGTATTTTTACCAAGGATTTGTCTACATCGGGCCTATTAAGTGAATGCATCAATC  
CGGAATATTAGTACCCGCCCTACAATCACAGTGGTTAATGTATGTAAGTATGATGGTATTGGGTTATGCAGCTCTTT  
TAGGCGGATCATTATTATCTGTAACACTTCTAATTTATATTTTCAAAAAGATTTAATACAAGTTTTTTGAT-----  
AAACGAAAACATTTA-----TTA---AATGAGTCATTTTTCTTCGGTGAGATTCAATACATAAAT-----  
GAAAAA-----AGCAATATAGTA-----CAA-----AATGCTTCG-----CCCTCT-----  
-  
TATGTTGCAAATTTATTACAGGTCCCAATTGATTGAACAAGTGGATCATTGGAGTTATCGGGTTATTAGTCTAGGATTTAT  
CTTTTTAACCATAGGTATTCTTTTCAGGGGCAGTATGGGCCAATGAGGCATGGGGGTCATATTGGAAGTGGGACCCAAAGG  
AAACTTGGGCGTTTTATTACTTGGACCATATTTGCAATTTATTTACATATTCGAACA-----  
AATAAAAATTTGCGGGT-----  
GCAAATTTCTGCAATTTGTGGCTTTTATAGGCTTTCTTATAATTTGGATATGCTATTTTTGGGGTTAATCTATTAGGAATAGG  
GCTACATAGTTATGGTTCATTTACATTAACGCTTAAT-----  
-----ATG---GAAAAAAG-----  
-----AAAGTATTTATTCCTTTTCTA-----TATCTTATATCTATAGTATTT-----  
TTACCCTGGTGGATCTATCTATCATT-----  
CAAAAAGTCTGGAATCTTGGGTTACTACTTGGTGGAACTACTAAGCAATCTGAAACTTTTTTGAATGATATTCAAGAAAA  
AAAGCTTCTCGAAAATTCATCGAATTAGAGGAGCTCCGCTTGTTG-----  
GACGAAATGATAAAGGAA---  
TATCCAGAAACACAGTTACAAAAACTCGGTATAGGAATCCACAATGAAACGATTCAATTGATCAAGATGCACAATGAGGA  
TTGTATCCATATGATTTTTGCACCTTCTCGACAAAATTTAATCTGTTTCTTATTCTAGGCGGTTATTCCATTCTGGGAAATA  
AAGAATTTATTCTTCTTAATTCTTGGGTTTCAGGAATTCCTATATAACTTAAGCGACACAATAAAAAGCTTTTTCTATTCTT  
TTAGTAACCGATTTATGTATCGGATTTTATTACCCCGGGTTGGGAACTACTAATTGAATCTATCTACAAAAGATTTTGG  
ATTTGCCGATAACGATCAA-----  
ATTATATCGAGTCTTGTTCCTACTTTTCCAGTCATTCTAGATACAATTTTGAATATTGGATATTCCGTTCTTTAAATCG  
TGTATCCCATCGCTTGTAGTGATTTATCATTCAATGAATGAC-----  
ATGCCTATTGGTGTTCAAAAGTTCCCTTTTCGAAGTCCT-----  
-----GGAGAGGAAGAT-----  
--GCATCTTGGGTTGACGTATACAACCGACTTTATCGAGAAAGATTACTT---  
TTTTTAGGCCAAGAAGTTGATAGCGAGATCTCGAATCAAC

Triticum

TGTTAATAAGCAAGACGTGCTTTTTATTTATCGATAATATCTTTTCGTTTTGTTCAAGCAGGATCAGAGGTATCCGCTTTAT  
TAGGGAGAATGCCCTCCGCAGTGGGTTATCAACCTACTCTTAGTACAGAAATGGGTTCTTTGCAAGAAAGAATTGCTTCT  
ACTAAAAAGGGATCTATAAATTTCGATTCAAGCAGTTTATGTACCTGCAGACGATTTGACCGACCCTGCCCTGCCACAAC  
ATTTGCACATTTGGATGCTACTACCGTACTTTCCAGAGGATTAGCTTCCAAGGGTATTTATCCAGCAGTAGATCCTTTAG  
ATTTCAACCTCGACTATGTTACAGCCTCGGATCGTTGGCAACGAACATTATGAAACTGCGCAAAGAGTTAAGGAAACTTTA  
CAACGTTACAAAGAACTTCAGGACATTATTGCAATTCTTGGCTTGGATGAATTATCGGAAGAGGATCGTTTAACTGTAGC  
AAGAGCAAGAAAAATTGAGCGTTTCTTATCACAACCGTTCTTTGTGGCAGAAGTTTTTACTGGTTCTCCAGGAAAGTATG  
TTGCTCTTGCAGAACTATTAGGGGATTTCAACTAATCTTTCCGGAGAATTAGACGGCCTACCTGAACAGGCTTTTTTAT  
TTGGTGGGTAACATCGATGAAGCTAGCACGAAAGCTATAACCTTAGAA-----GAGGAG---AACAAATCGCAGAAA--  
-

ATGAAATTAATCTTTATGTACTGACTCCTAAGCGAATTATTTGGGATTGTGAGGTGAAAGAAATCATTTTATCCACTAA  
TAGTGCCAAATTGGCGTATTACCAAACCACGCCCCCATTAAACACAGCAGTAGATATGGGTCCTTTGAGAATACGC---  
CTCCTC-----

AACGACCAATGGTTAACAGCGGTTCTGTGGAGCGGTTTTGCGAGAATAGTTAATAATGAGATCATCATTTTAGGAAATGA  
TGCGGAACTGGGTAGTGATATTGATCCGGAAGAAGCTCAAAGGCCTTGAAATAGCCGAAGCTAACTTGAGTAAAGCTG  
AGGGTACGAAAGATTTGGTTGAAGCGAAGCTCGCTCTCAGACGAGCTAGGATACGAATCGAGGCTGTCAATTGGATTCCC  
CCATCCAAT-----ATGAAAAATGTAACCCATTCTTTTCGTTTTT---TTA---

GCTCACTGGCCATCCGCTGGCAGTTTCGGGCTT---  
AATACCGATATTTTAGCAACAAATCTAATAAATCTAACTGTAGTGGTTGGTGTGTTTTGATTTTTTTTTGGAAAGGGAGTG--  
-----

TTAAAAGATTTATTAGATAATCGAAAACAGAGGATCTTGAGTACTATTCGAAATTCAGAAGAATTGCGTAGAGGGACCAT  
TGAGCAACTCGAAAAGCTCGGATTCGATTACAGAAAAGTCGAACTAGAAGCGGATGAGTATCGAATGAATGGATACTCTG  
AGATAGAACGAGAAAAAGCAAATTTGATTAATGCTACTTCTATTAGTTTGGAAACAATTGGAAAAGTCTAAAAACGAAACC  
CTTTATTTTGA AAAACAAAGGGCAATGAATCAGGTCCGACAGCGGGTTTTCCAACAGGCCGTACAAGGAGCTCTAGGAAC  
TCTGAATAGTTGTTTG-----AATACCGAGTTACATTTCCGTACGATTCGTGCTAATATTGGCATTCTCGGGTCCCTG-  
-----GAATGG---AAGAGA---

ATGAATCCACTAATTGCTGTCTTCTGTTATTGCTGCTGGATTGGCCGTAGGGCTTGCTTCTATTGGACCTGGAGTTGG  
TCAAGGTACTGCTGCAGACAAGCTGTAGAAGGTATTGCGAGACAGCCAGAAGCAGAAGGTAATAACGAGGTACTTTAT  
TGCTTAGTCTAGCTTTTTATGGAAGCTTTAACAATTTATGGACTAGTTGTGGCACTAGCGCTTTTTATTTGCGAACCCTTTT  
GTT---ATGAATATTATA-----CCTTGTTCCATTA AAAACACTC---AAG---GGGTTA---

TACGATATATCGGGTGTAGAAGTAGGCCAACACTTCTATTGGCAAATAGGAGGTTTCCAAATTCATGCCCAAGTACTCAT  
CACTTCTTGGGTGCTAATTACTATCTTGTAGGTTTCAGTTGTCATAGCTGTT---  
CGGAATCCACAAACCATCCCGACCGACGGTCAGAATTTTTTTGAATATGTCCTTGAGTTTATTTCGAGACTTGAGCAAAAC  
TCAGATTGGA---

GAAGAATATGGTCCCTGGGTTCCCTTTATTGGAACATGTTCCTTTTTTTTGTTTTCGAATTGGTCGGGTGCTCTTTT  
ACCTTGGA AAATTATAGAGTTACCCCATGGGGAATTAGCAGCGCCACGAATGATATAAATACTACTGTTGCTTTAGCTT  
TACTCACGTCAGCGGCATATTTTTATGCTGGTCTTAGCAAAAAGGATTGAGCTATTTTCGAGAAATATATTAACCAACT  
CCAATCCTTTTACCAATTAACATCCTAGAAGATTTACAAAACCAATTATCACTTAGCTTTTCGACTTTTCGGGAATATATT  
GGCGGATGAATTAGTCGTTGTTGTTCTTGTGTTCTTTAGTCCCCTTAGTAATCCCTATACCGGTCATGTTTCTTGGATTAT  
TTACAAGCGGTATTCAAGCTCTTATTTTTGCAACATTAGCCGCAGCCTATATAGGTGAATCCATGGAGGGTCATCAT---  
---

ATGCTATTTGCAACTTTAGAACATATACTA ACTCATATCTCTTTCTCAACGATTTCAATTGTGATTACGATTCAATTTGAT  
AACC-----TTATTA---GTT-----

CGTGA ACTTGGAGGATTACGTGATTTCGTGAGAAAAGGAATGATAGTTACTTTTTCTCTATAACAGGATTCTTAGTTTC  
TCGTTGGGCTTCCCTCGGACATTTTCCATTAAGTAATTTATATGAGTCATTGATCTCCCTTTCATGGGCCCTGTATATTC  
TTCATACCATTCTTAAA-----ATACAG---AACTCTAAAAATGAT---

TTAAGCACAATAACTACGCCAAGTACTATTTTAACGCAAGGCTTTGCCACATCGGGTCTTTTAACTGAAATGCATCAATC  
CACGATACTAGTACCTGCTCTACAATCTCAGTGGTTAATGATGATGTCAGTATGATGTTATTAAGCTATGCAACTCTTT  
TGGGCGGACCCCATATCCGCCGCTATTCTAATCATTAGATTTGCAAATAAT---TTCCATTTCTTTTCT-----  
AAAAAGAAAAAAATGTT-----TTA---AATAAAACATTTCTCTTTAGTGATATTAATATTTTTTAT-----  
GCAAAA-----AGAAGTGCTTTA-----AAA-----AGAACCTCT-----GTCCCT-----  
-

TCATTTCCAAATTATTACAAATATCAATTAACGGAGCGTTTTGGATTCTTGGAGTTATCGTGTCAATTAGCCTAGGATTTAC  
CCTTTTAAACCGGAGGATTCTTGGTGGAGCAGTATGGGCTAATGAGGCCTGGGGAGCCTATTGGAATTGGGATCCCAAGG  
AAACTTGGGCATTTATTACTTGGACCATATTCGCAATTTATTTACATAGTAGAACA-----  
CATCCAAATTGGAAGGGT-----

ACGAATTCGCGACTTATAGCTTCGATAGGATTTCTTATAATTTGGATTTGTTATTTTGGTATAAAATCTATTAGGAATAGG  
CTTACATAGTTATGGTTCGTTTACATTAACACCTAAA-----ATG---AAAAAAAAG-----  
-----AAAGCATTGCCTTCTTTACTA-----TATCTTGTATTTATCGTACTT-----  
TTGCCTTGGGGGGTCTCTTCCTCATT-----  
AACAAATGTCTGGAACCTTTGGATTAAGAATTGGTGGAAATACCAGGCAATCCGAACTCTCTTAACTGATATTCAAGAGAA  
AAGGATTCTAGAAAAGATTCATAGAATTAGAAGAACTTTCTCTCTTG-----  
GACGAGATGATAAAAAGG---  
AAACTAAAGACACATGTACAAAAACCTCCTACAGGAATACACAAGGAAATAATACAATGGGTCAAATAAATAATGAGGA  
TCATCTCCATACCATTTTGCATTTCTCGACAAATATAATCTGTTTGGCTATTCTAAGTGGTTCTTTTTTCTGGGTAAAG  
AGGAACTTGTCAATTTTGAATTTCTGGGTTCCAGGAATTTCTTATAATTTAAATGACTCAATAAAAAGCTTTTTTTATTCTT  
TTAGTTACTGATTTTTTTTGGATTTTCACTCCACCCGTGGTTGGGAACTAGTAATTCGTTGGGTCTACAACGATTTTGG  
ATGGGCTCCTAACGAGCTT-----  
ATTTTCACTATTTTTGTTTGTAGTTTTCCAGTAATTCTAGATACATGTTTGAAATTTGGGTCTTTTTTTGTTTAAACCG  
TCTATCTCCTTCGCTTGTAGTCATTTATCATTCAATTAGTGAAGCA-----  
ATGCCATTGGTGTTCAAAAGTACCTTACCGGATTCCT-----  
-----GGAGATGAAGAA-----  
--GCGACTTGGGTTGACTTATACAATGTTATGTATCGAGAAAGGACACTT---  
TTTTTAGGTCAAGAGATTCGTTGCGAGATCACGAATCATA  
Typha  
TGTTAATGAACAAGATGTGCTTCTATTTCATCGACAATATCTTTTCGTTTCGTACAAGCCGGATCAGAAGTATCTGCCTTAT  
TAGGGAGAATGCCCTCTGCAGTGGGTTATCAACCCACCCTTAGTACAGAAATGGGTTCTTTGCAAGAAAGAATTACTTCT  
ACCAAAGAGGGATCTATAACTTCGATCCAAGCAGTTTATGTACCTGCGGACGATTTGACTGACCCTGCTCCTGCCACGAC  
ATTTGCCCATTTGGATGCTACTACCGTACTATCAAGAGGATTAGCTGCCAAAGGTATTTATCCAGCAGTGGATCCTTTAG  
ATTCACGTCAACTATGTTACAACCTCGGATCGTTGGTGAGGAACACTATGAAACTGCGCAAAGAGTTAAGGAAACTTTA  
CAACGTTACAAAGAACTTCAGGACATTATAGCTATTCTTGGGTTGGATGAATTATCCGAGGAGGATCGTTTAACTGTAGC  
AAGAGCACGAAAAATTGAGCGTTTCTTATCACAACCCTTCTTCGTGGCAGAAGTATTTACTGGTCTCCAGGAAAAATATG  
TTGGTCTTGCAGAAACAATTAGGGGGTTTCAACTGATACTTTCCGGAGAATTAGACAGTCTGCCCGAGCAGGCCTTTTAT  
TTGGTGGGTAACATCGATGAAGCTACCGCGAAAGCTATGAACTTAGAA-----GTGGAG---AGCAAATTGAAGAAA--  
-  
ATGACCTTAAATCTTTGTGTAAGTACTGACTCCTAATCGAATTATTTGGGATTCAAAGTAAAAGAAATCATTTTATCTACTAA  
TAGTGCCAAATTTGGTGTATTACCAAACCACGCCCTATTGCCACGGCTGTAGATATCGGTCTTTTGAGAATACGC---  
CGC-----  
GACGACCAATGGTTAACGGTGGCTCTGATGGGTGGTTTTGCTAGAATAGGTAATAATGAGATCACCATTTTAGGAAATGA  
TGCGGAGATGAGTACTGACATTGATCCGCAAGAAGCTCAACAAGCTCTTGAAATAGCTGAAGCTAACTTGAGTAAAGCTG  
AAGGTAACGACAAGTAATTGAAGCAAATTTAGCTCTCAGACGGGCTAGGACACGAGTAGAGGCTGTCAATGTTATTTCC  
-----ATGAAAAATGTAACCGATTCTTTTCGTTTTT---TTG---  
GGCCACTGGCCATCCGCCGGGAGTTTCGGGTTT---  
AATACCGATATTTTAGCAACAAATCTAATAAATCTAAGTGTAGTGATTGGTGTATTGATTTTTTTTTGGAAAGGGAGTG--  
-----  
TTAAAAGATTTATTAGATAATCGAAAACAGAGGATCTTGATTACTATTCGCAATTCGGAAGAATTACGTAAAGGGGCCAT  
TGAGCAACTCGAAAAGCCCGGGTTCGCTTACGGAAAGTGGAACTAGAAGCAGATGAGTATCGAACGAATGGGTATTCTG  
AGATAGAACGAGAAAAAGAAAATTTGATTAATGCCACTTGTGATAGTTTGGAAACGATTAGAAAATTACAAAAATGAAACC  
CTTGATTTTGA AAAACAAAGAGCAATGAATCAGGTCCGACAACGAGTTTTCCAACAAGCCTTACAAGGAGCTCTAGGAAC  
TCTGAATAGTTGTTTGAATATGAATACCGAGTTACATTTCCGTACTATCCGTGCGAATATTGGCATTCTCGGGGCGATGG  
AA-----GAAATA---ACTGAT---  
ATGAATCCACTGATTTCTGCGCTTCTGTTATTGCTGCTGGATTGGCTGTAGGGCTTGCCTTCTATTGGACCTGGAGTTGG  
TCAAGGTACTGCTGCAGGCCAAGCTGTAGAAGGTATTGCGAGACAACCAGAAGCAGAGGGTAAAATACGAGGTACTTTAT  
TGCTGAGTCTAGCTTTTTATGGAAGCTTTAACAATTTACGGACTGGTTCGTGGCATTAGCACTTTTATTTGCGAATCCTTTT  
GTT---ATGAATGTTATA-----CCATGTTCCATTA AAAACTC---AAG---GGGCTA---  
TACGATATATCGGGTGTAGAAGTAGGCCAACATTTCTATTGGCAAATAGGAGGTTTACAAATCCATGCCCAAGTACTTAT  
CACTTCTTGGTTGCTAATTGCTATCTTGTAGGTTCCAGCCATCATAGCTGTT---  
CGGAATCCACAACTATTCCGACCGACGGTCAGAATTTCTTCGAATATGTCCTTGAATTTATCCGAGACTTGAGCAAAAC  
CCAAATTGGA---  
GAAGAATATGGTCTTTGGGTTCCCTTTATTGGAACATGTTCCATTTTATCTTTGTTTCTAATTGGTCAGGTGCTCTTTT  
ACCTTGGA AAAATCATAGAGTTACCTCATGGGGAGTTAGCTGCGCCACGAATGATATAAATACTACTGTTGCTTTAGCTT  
TACTCACGTCAGTGGCATATTTTTATGCGGGTCTTACTAAAAAAGGATTGGGTTATTTTCGAGAAATACATTA AACCACT

CCAATACTTTTACCAATTAACATCTTAGAAGATTTACAAAACCTTTATCTCTGAGTTTTCGACTTTTCGGGAATATATT  
GGCTGATGAATTAGTAGTTGTTGTTCTTGTTCCTTTAGTCCCTTCAGTAGTTCCTATACTGTTATGTTTCTTGGATTAT  
TTACAAGTGGTATTCAAGCTCTTATTTTTGCAACGTTAGCCGCGGCTTATATAGGCGAATCCATGGAGGGGCATCAT---

ATGATATTTGCGACTTTAGAACATATATTAAGTCATATTTCTTTTTCGATCATTTTAAATTGTGATTCCGATTCAATTTGAT  
GACC-----TTATTA---GTC-----

CACGAAATTAGCGGATTACGTGATTCGTGACAGAAAAGGGGATGATAGCTACTTTTTATCGATAACTGGATTATTAGTTTC  
TCGTTGGATTTCTTCGGGACATTTTCCGTTAAGTAATTTATACGAGTCAGTAATCTTCCTTTTCGTGTGGTTTCTCCATTA  
TTTATATGATTCCAAA-----ATACGG---AACCATAAAAAATGAT---

TAAAGCACAATAACTGCACCAAGTACTATTTTACTCAAGGCTTTGCCACGTCGGGTCTTTTAACTGAAATGCATCAATC  
CGCAATATTAGTACCTGCTCTACAATCTCAGTGGTTAATGATGCATGTAAGTATGATGTTATTGAGCTATGCCGCTCTTT  
TATGCGGATCCTTATTATCAGTCGCTCTTCTAGTCATTACATTTTCGAAAAAAC---ACCACTATTTTTTGT-----  
AAAAACGATAATTTT-----TTC---ATTAAGTCATTTTTCTTTGGAGAGATTGAATCTTTGAAT-----  
GAAAA-----AGAAGTGTTTT-----AAA-----AACACTTCT-----TTTCTT-----

TCATTTAAAAATTATTACAAATATCAATTAACTGAACGTTTGGATTATTGGAGTTATCGTGTAATTAGTCTAGGATTAC  
CTTTTTAACCATAGGTATTCTTTGTGGAGCAGTATGGGCAAATGAGGCATGGGGATCCTATTGGAATTGGGACCCCAAGG  
AAACTTGGGCATTTATTACTTGGACCATATTCGCAATTTATTTACATACTAGAACA-----  
AATCAAAATTGGAAAGGC-----

ACGAATTCGGCACTTGTGGCTTCTATAGGATTTCTTATAATTTGGATATGCTATTTTGGTATCAATTTATTAGGAATAGG  
TCTACATAGTTATGGTTCATTACATTAACATCTAAT-----

-----AAAATG---AAAAAAAAG-----

-----AAAGCATTGCCTTCTTTCCCA-----TATCTTGCATCTATAGTTTTT-----

TTGCCCTGGTGGGTCTCTTTCTCATT-----

AATAAATGTCTGGAACCTTTGGGTTACCCTTGGTGGAAATACTAGGCAATCCGAAACTCTCTTCAATGATATTCAAGAGAA  
AAACCTTCTAGAAAAGATTATAGAATTAGAAGAACTCTTTCTGTTG-----

GACGAAATGATAAAGGAG---

TACCCGGAGACACATATACAAAAACTTCGGATAGGAATACACAAGGAAACGATACAATTGGTCAAAAACACATAATGAATA  
CCATCTGCAGATCATTTTGCATTTCTCGACAAATATAATCTGTTTCGCTATTCTAAGTGGTTATTTTTATTCTGGGTAATG  
AGGAATTTGTCATTCTTAACTCTTGGGTTTCAGGAATTCCTATATAACTTAAAGTATACAATAAAAGCTTTTTTCGATTCTT  
TTATTTACTGATTTATGGATTGGATTTCACTCGACCCATGGTTGGGAACTCATAATAGGTTTCGGTCTACAACGATTTTGG  
ATTGGCTCATAACGATCAA-----

ATTATATCTGGTCTTGTTCCTACTTTTCCAGTTATTCTAGATACAATTGTGAAATATTGGATCTTCCATTATTTAAACCG  
TGTATCTCCTTCGCTTGTAGTCATTTATCATTCAATGAATGAA-----

ATGCCCATTTGGTGTTCAAAAGTACCTTTTTCGGAGTCCT-----

-----GGAGAGGAAGAT-----

--GCGGTTTTGGGTTGACGTA---AACCGACTTTATCGAGAAAGATTACTT---

TTTTTAGGCCAAGAGGTTGATAGCGAGATCTCGAATCAAC

Vitis

TGTTAATGAACAAGACGTACTTCTATTTATCGACAATATCTTCCGTTTCGTCCAAGCAGGATCCGAAGTATCTGCCTTAT  
TGGGCAGAATGCCTTCCGCTGTGGGTTATCAACCTACCCTTAGTACCGAAATGGGTACTTTACAAGAAAGAATTACTTCT  
ACCAAGGAGGGGTCCATAACTTCTATTCAAGCAGTTTATGTACCTGCGGACGATTTGACCGACCCTGCCCTGCCACAAC  
ATTTGCACATTTAGATGCTACTACCGTACTATCAAGAGGATTAGCTGCCAAAGGTATCTATCCAGCAGTAGATCCTTTAG  
ATTCACGTCAACTATGCTCCAACCTCGTATCGTTGGTGGAGAACATTATGAAACTGCGCAAAGAGTTAAGCAAACCTTTA  
CAACGTTACAAAGAACTTCAAGACATTATAGCTATCCTTGGGTTGGACGAATTATCCGAAGAGGATCGTTTAAACCGTAGC  
AAGAGCACGAAAAATTGAGCGTTTCTTATCACAACCCTTTTTCGTAGCAGAAGTATTTACCGGTTCTCCAGGGAAATATG  
TTGGTCTAGCAGAAACAATTAGAGGGTTTCAATTGATCCTTTCCGGAGAATTAGATGGTCTTCCCGAACAGGCCTTTTAT  
TTGGTAGGTAACATCGATGAAGCTACCGCGAAGGCTATGAACTTAGAA-----ATGGAG---AGCAAATTGAAGAAA--

ATGACCTTAAATCTTTGTGTAAGTACCCCTAATCGAATTGTTTGGGATTCAAAGTAAAAGAAATCATTTTATCTACTAA  
TAGTGGACAAATTGGCATATTACCAAATCACGCCCTATTGCCACAGCTGTAGATATAGGTATTTTGAAGTACGC---  
CTT-----

AACGACCAATGGTTAACGATGGCTCTGATGGGCGGTTTTGCTAGAATAGGCAATAATGAGATCACTGTTTTAGTAAATGA  
TGCGGAGAAGGGTAGTGACATTGAGCCACAAGAAGCTCAGCAAACCTTTGAAATAGCGGAAGCTAACTTGGAGAAAGCTG  
AAGGCAAGAGACAAATAATTGAGGCAAATCTAGCTCTTAGACGAGCTAGGACACGAGTAGAGGCTATCAATGTGACTTCG  
-----ATGAAAAATGTAACCGATTCTTTTCGTTTTCC---TTG---

GGTCACTGGCCATCCGCCGGGGTTTTCGGGTTT---

AATACCGATATTTTAGCAACAAATCCAATAAATCTAAGTGTAGTGCTTGGTGTATTGATCTTTTTTGGAAAGGGAGTG--  
-----  
TTAAGTGATTTATTAGATAATCGAAAACAGAGGATCTTGAATACTATTTCGAAATTCAGAAGAACTACGTGAGGGGGCCAT  
TGAACAACCTCGAAAAAGCCCGGGCCCGCTTACGGAAAGTGGAAATGGAAGCAGATCAGTATCGAGTGAATGGATACTCTG  
AGATAGAACGAGAAAAATTGAATTTGATTAATTCAACTTATAATACTTTGGAACAATTAGAAAATTACAAAAATGAAACC  
ATTCATTTTTGAACAACAAAGAGCGATTAATCAAGTCCGACAACGGGTTTTGCAACAAGCCTTACAAGGAGCTCTAGGAAC  
TATCAATAGTTGTTG-----  
AACAAAGGAATTACATTTACGTACTATCAGTGCTAATATTGGCATGTTTGGGTTCGATGAAA-----  
GAAATAAGAAATAAC---  
ATGAATCCACTGATTTCTGCCGCTTCCGTTATTGCTGCTGGATTGGCCGTAGGGCTTGCTTCTATTGGACCTGGCGTTGG  
TCAAGTACTGTGCGGCCAAGCTGTAGAAGGTATCGCAAGACAGCCCCGAGGCGGAGGGAAAAATACGAGGTACTTTAT  
TGCTTAGTCTGGCTTTTATGGAAGCTTTAACAATTTATGGACTGGTTGTAGCATTAGCACTTTTATTTGCGAATCCTTTT  
GTT---ATGAATGTTCTA-----TCATGTTCCATCAACACACTA---AAA---GGGTTA---  
TACGATATATCTGGTGTGGAAGTCGGCCAACATTTCTATTGGCAAATAGGGGGTTTCCAAGTCCATGCCCAAGTACTTAT  
TACTTCGTGGGTTGTAATCGCTATCTTATTAGGTTAGCTACTCTAGCTGTT---  
CGAAATCCACAAACCATTCTACTGACGGTCAGAATTTCTTCGAATATGTCCTTGAATTCATTTCGAGACGTGAGCAAAAC  
TCAGATTGGA---  
GAAGAATATGGTTCCTGGGTTCTTTTTATTGGAACATGTTTCTATTTATTTTTGTTTCGAATTGGTCAGGGGCTCTTTT  
GCCTTGGAAAATCATAACAGTTACCTCATGGGGAGTTAGCTGCACCCACGAATGATATAAATACTACTGTTGCTTTAGCTT  
TACTCACATCAGTGGCCTATTTCTATGCGGGTCTTACCAAAAAGGGATTAGGTTATTTTCGGTAAATACATTCAACCGACT  
CCAATCCTTTTACCTATTAACATCTTAGAAGATTTTACAAAACCTTTATCACTTAGTTTTCGACTTTTTCGGTAATATATT  
AGCTGATGAATTAGTAGTTGTTGTTCTTGTTCCTTTAGTACCTTCAATTGTTTCTTATACCTGTCATGTTTCTTGGATTAT  
TTACAAGTGGTATTCAAGCTCTTATTTTTGCAACTTTAGCCGCGGCTTATATAGGCGAATCCATGGAGGGTTCATCAT---  
---  
ATGATATTTTCGACTTTAGAGCATATATTAACCTCATATCTCCTTTTCGGTTCGTTTCAATTGTAATTACAATTCATTTGAT  
AACC-----TTATTA---GTC-----  
GATGAAATCGTAGGACTTTCTGATTCGTCAGAAAAGGGCATGATAGCTACTTTTTTCTGTATAACAGGATTATTAGTCAC  
TCGTTGGATTTATTTGGGACATTTCCCATTAAGTGATTTGTATGAATCATTAAATTTTCTTTTCATGGAGTTTCTCCATTA  
TTCATATAGTTCCATAT-----TTTTAAA---AAACATAAAAAATCAT---  
TTAAGCGCACTAACCCGCGCCAAGTGCTATTTTTACCCAAGGATTTGCTACTTCAGGTCTTTTAACTGAAATGCATCAATC  
CGAAATATTAGTACCCGCTCTCCAATCCCAGTGGTTAATGATGCATGTAAGTATGATGGTATTGGGTTATGCAGCTCTTT  
TATGTGGATCATTATTATCAGTAGCTCTTTTAGTCATTACATTTTCGACAAGAC---ATAAGGATTCTTTGT-----  
AAAAACAATCATTTT-----TTA---AATAAGTCATTTTCTTTGATGAGATCCAATATATGAAT-----  
AAAGGA-----AACAAATGTTTTA-----CAA-----AACACTTCT-----TTTCTT-----  
-  
TCTGTTAGGAATTATTACAGGGCCCAATTTATTCAACAATTGGATCATTGGAGTTATCGTGTATTAGTTTAGGGTTTCT  
TTTTTTAACCATAGGTATTCTTTTCGGGAGCAGTGTGGGCTAATGAGGCATGGGGATCATATTGGAATTGGGACCCAAAAG  
AAACTTGGGCATTTATTACTTGGACCATATTCGCGATTTATTTACATACTCGAACA-----  
AATAAAAATTTGCAAGTC-----  
GCAAATTCGCAATTGTGGCTTCTATGGGCTTTCTTATAATTTGGATATGCTATTTTGGGGTCAATCTATTAGGAATAGG  
GCTACATAGTTATGGTTCATTTACATTTTTCATCTAAC-----  
-----ATG---ACAAAAAAG-----  
-----AAAGCATTCACTCCCCTTCTA-----TATCTTGCATCTATAGTATTT-----  
TTGCCCTGGTGGATCTCTCTACTT-----  
AATAAAAGTCTGGAATCTTGGGTTACTAATTTGGTGGAAATACTAGGCAATCTGAAACTTTTTTGAATGATATTCAAGAAAA  
GAGTATTCTAGAAAAATTCATAGAATTAGAGGAATCTTCTTGTG-----  
GACGAAATGATAAAGGAA---  
TGCCCGGAAACACATCTACAAAAGCTTCGTATGGGAATCCACAAAAGAAACGATCCAATTGATCAAGATGTACAATGAGGA  
TCCTATCCATACGATTTTGCACCTTCTCGACAAATATAATCTGTTTCGTTATTCTAAGTGGTTATTCTATTCTGGGTAATG  
AAGAACTTCTTATTCTTAACTCTTGGATTAGCAATTCCTATATAACTTAAAGCGACACAATAAAAGCTTTTTCTATTCTT  
TTATTAAGTATTTATGTATCGGATTCCACTCGCCCCATGGTTGGGAATGATGATTGGCTCTGTCTACAAAGATTTTGG  
ATTTGCTCATAACGATCAA-----  
ATTATATCTGGTCTTGTTCACCTTTCCGGTCACTTCTAGATACAATTTTAAAATATTGGATCTTCCGGTATTTAAATCG  
TGTATCTCCGTCACCTTGTAGTGATTTATCATTCAATGAATGAC-----  
ATGCCTATTGGTGTTCAAAAGTGCCTTTTTCGAAATCCT-----  
-----GGAGAGGACGAT-----

--ATATCTTGGATTGACGTATAACAACCGACTTTATCGAGAAAGATTACTT---

TTTTTAGGCCAAGAGGTTGAGAGCGAGATCTCGAATCAAC

Yucca

TGTTAATGAGCAAGACGTGCTTTTTATTTCATCGACAATATCTTTTCGTTTTGTCCAAGCAGGGTTCAGAAGTATCCGCTTTAT  
TAGGGAGAATGCCCTCCGCAGTAGGTTATCAACCCACCCTTAGTACAGAAATGGGTTCTTTGCAAGAAAGAATTACTTCC  
ACCAAAGAGGGATCTATAACTTCGATCCAAGCAGTTTATGTACCCGCAGATGATTTGACCGACCCCGCTCCTGCCACGAC  
ATTTGCACATTTAGATGCTACTACTGTACTATCAAGAGGATTAGCTGCCAAAGGTATTTATCCAGCAGTAGATCCTTTAG  
ATTC AACGTCAACTATGTTACAACCTCGGATCGTTGGCGAGGAACATTATGAAACTGCGCAAAGAGTTAAGGAACTTTA  
CAACGTTACAAAGAACTTCAGGACATTATAGCTATCCTGGGGTTGGACGAATTATCCGAAGAAGATCGTCTAACTGTAGC  
AAGAGCACGAAAAATTGAGCGTTTCTTATCACAACCCTTCTTCGTGGCAGAAGTCTTTACCGGTTCTCCAGGGAAATATG  
TTGGTCTCGCAGAAACAATTAGGGGGTTTCAACTGATACTTTCCGGAGAATTAGATAGTCTTCCCGAGCAGGCCTTTTAT  
TTAGTGGGTAACATCGATGAAGCTACCGCGAAAGCTATGAACTTAGAA-----GGGGAG-----AAGAAA--

-

ATGACCTTAAATCTTTGTGTACTGACTCCTAATCGAATTATTTGGGATTGAGAAGTGAAAGAAATCATTTTATCTACTAA  
TAGTGGCCAAATTGGCGTATTACCAAACCACGCCCTATTGCCACGGCGGTGGATATAGGTCTTTTGAGAATACGC---  
CTC-----

AATGACCAATGGTTAACGGTGGCCCTGATGGGCGGTTTCGCTAGAATAAGTAATAATGAGATCACCATTTTAGGAAATGA  
TGCGGAGATGAGTACTGACATTGATCCGCAAGAAGCTCAACAAGCTCTTGAAATAGCTGAAGCTAACTTGAGTAGAGCTC  
AGGGTAAGAGACAAGCAATTGAGGCGAATCTAGCTCTCAGACGAGCTAGGACACGAGTAGAGGCTCTGAATGTTATTTCCG  
-----ATGAAAAATGTAACCGATTCTTTTCGTTTCC---TTA---

GGCCATTGGCCATCCGCCGGGAGTTTTGGGTTT---

AATACCGATATTTTAGCAACAAATCCAATAAATCTAAGTGTAGTGCTTGGTGTATTGATTTTTTTTTGGAAAGGGAGTG--  
-----

TTAAATGATTTATTAGATAATCGAAAACAGAGGATTTTGGGTACTATTTCGAAATTCGGAAGAATTACGTAGAGGGGCCAT  
TGAGCAGCTCGAACGAGCCCGGGCTCGTTAAGGAAAGTGGAAATGGAAGCAGATGAGTATCGAATGAATGGATACTCTG  
AGATAGAACGAGAAAAAGCCAATTTGATTAATGCTACTTCTGATAGTTTGGAAACAATTAGAAAATTACAAAAATGAAACC  
CTTCATTTTGAACAACAAGAGCGATTAATCAGGTCCGACAACAAGTTTTCCAACAAGCCTTACAGGGGGCTCTAGGAAC  
TCTGAATAGTTGTTTG-----

AATAGCGAGTTACATTTCCGTACCATCAATGCTAATATTGGAATCCTCGGGGCCATGGAA-----GAAATA---  
ACTGAT---

ATGAATCCACTGATTTCTGCCGTTCCGTTATTGCTGCTGGATTGGCCGTAGGGCTTGCTTCTATTGGACCTGGAGTTGG  
TCAAGGTACTGCTGCAGGCCAAGCCGTAGAAGGTATTGCGAGACAACCAGAAGCAGAAGGAAAAATACGAGGTACTTTAT  
TGCTTAGTCTAGCTTTTATGGAAGCTTTAACAATTTATGGACTGGTTCGTGGCATTAGCGCTTTTATTTGCGAATCCTTTT  
GTT---ATGAATGTTATA-----CCATGTTCCATTAACACTC---AAA---GGGTTA---

TACGATATATCAGGTGTAGAAGTAGGCCAACATTTATATTGGCAAATAGGAGGTTTACAAATTCATGCCCAAGTACTTAT  
CACTTCTTGGGTGCTAATTGCTATCTTATTAGGTTTCAGTCATCCTAGCTGTT---  
CGGAATCCACAACCATTCCAACCGACGGTCAGAATTTCTTCGAATATGTCCTTGAATTTATTTCGAGACTTGAGCAAAAC  
TCAGATTGGA---

GAAGAATATGGTCCTTGGGTTCCCTTTATTGGAACATGTTCCATTTATTTTTGTTTCTAATTGGTCAGGTGCTCTTTT  
ACCTTGGAAAATCATAACAGTTACCTCATGGGGAGTTAGCCGCCCCACGAATGATATAAATACTACTGTTGCTTTAGCTT  
TACTCACGTGAGTGGCATATTTTTATGCGGGTCTTACCAAAAAGGATTGGGCTATTTTCGGAATAACATTC AACCAACT  
CCAATCCTTTTACCAATTAACATCCTAGAAGATTTCAAAAACCTTTATCTCTTAGTTTTCGACTTTTTCGGGAATATATT  
GGCTGATGAATTAGTAGTTGTTGTTCTTGTCTTTAGTACCTTTAGTAGTTTCTTATACCTGTCATGTTTCTTGGATTAT  
TTACAAGTGGTATTCAAGCTCTTATTTTTGCAACTTTAGCTGCGGCTTATATAGGGGAATCCATGGAGGGTCATCAT---  
-----

ACTTTAGAACATATATTAACTCATCTCTTTTTTCGATCATTTC AATTGTGATTACGATTCATTTAATGACC-----  
CTATTA---ATC-----

CACGAAATCAGGGGTTACGTGATTTCATCAGAAAAGGGAATGATAGCTACTTTTTTCTCTATAACAGGATTATTAGTTAT  
TCGTTGGATTTCTTCAAGACATTTTCCATTAAGTAATTTATACGAGTCATTAATCTTCCCTTTCGTGGAGTTTTTCCATTA  
TTCATATGATTTCCAAG-----ATATGG---AATCATAAAAATGAT---

TTAAGCGCAATAACCGCCCCAAGTGCTATTTTTACCCAAGGTTTCGCCACATCGGGTCTTTCAAGTGAAATGCATCAATC  
GTCAATATTAGTACCTGCTCTACAATCTCAGTGGTTAATGATGCACGTAAGTATGATGTTATTGAGTTATGCAGCTCTTT  
TATGTGGGTCGTTATTATCAGTTGCTTTTCTAGTCACTTACATTTTCGAAAAAC---ATCGATATTTTTTGT-----  
AAAAACAAAATTTTC-----TTA---ATTAAGTCATTTTTCTTTGGCAAGATCGAATACGGGAAC-----  
GAAAAA-----AAAAGTGTTTTTAAT---AAA-----CACACCTCT-----CTTCTT-----

-

TCATTCGAAATTATTACAAATATCAATTAACTCAAGGTTTGGATTATTGGGGTTATCGTGTCAATTAGTTTAGGATTTAC

CTTTTTAACCATAGGTATTCTTTCTGGAGCAGTATGGGCTAACGAAGCATGGGGATCTTATTGGAATTGGGACCCCAAAG  
AAACTTGGGCATTTATTACTTGGACCATATTCGCGATTTATTACATACTAGAACA-----  
AATCAAAGTTTGAAGGT-----  
ACAAATTCGGCACTTGTAGCTTCTATAGGATTTCTTATAATTTGGATATGCTATTTTTGGGATC-----  
-----  
-----AAAAATGAA-AAAAAAAAG-----  
-----AAAGCATTGACTTCCCTCCCA-----TATCTTGCATCTATAGTATTT-----  
TTGCCCTGGTGGGTCTCTCTCATT-----  
CAAAAAAGTCTGGAACCTTGGATTATTAATTGGTGAATACTAGGCAATCCGAAACTTTTTTGAATGATATTCAAGAGAA  
AAATGTTCTAGAAAAATTCCTAGAATTAGAAGAACTCTTCTTGTG-----  
GACGAAATGATAAAAAGAA---  
TACCCGGAGACACATATACAAAAGTTTCGTATAGGAATACACAAGGAAACGATACAATTGGTCAAAAACACACAATGAATA  
TAATCTCCATATTATTTTGCATTTTTTCGACAAATATAATCTGTTTCGCTATTCTAAGTGGTTATTTTTATTCTGGGTAATG  
AAAAGCTTGTCAATTCTTAATTCTTGGGTTCCAGGAATCTTCTATAACTTAAGTGACACAATAAAAGCTTTTTTCGATTCTT  
TTAGTTACTGATTTATGGATCGGATTTCACTCGACCCACGGTTGGGAACTAATGATTGGTTCGATCTACAATGATTTTTGG  
ATTGGCTCATAACGATCAA-----  
ATTATATCTGGTCTTGTTCCTTTCCAGTTATTCTAGATACAATTGTGAAATATTGGATCTTCCGTTTTTTAAATCG  
CGTATCTCCTTCGCTCGTAGTCATTTATCATTCAATGAATGAA-----  
ATGCTATTGGTGTTCAAAAGTACCTTTTCGGAGTCT-----  
-----GGAGAGGAAGAT-----  
--GCAGTTTGGGTTGACGTA--AACCGACTTTATCGAGAAAGATTACTT---  
TTTTTAGCCAAGAAGTTGATAGCGAGATCTCAAATCAAC

Zea

TGTTAATAAGCAAGACGTGCTTTTATTCATCGATAATATCTTTTCGTTTTGTTCAAGCAGGATCGGAAGTATCCGCCTTAT  
TAGGCAGAATGCCCTCCGCAGTGGGTTATCAACCTACCCTTAGTACAGAAATGGGTTCTTTGCAAGAAAGAATTACTTCT  
ACCAAAAAGGGATCTATAACTTCGATCCAAGCAGTTTATGTACCTGCAGACGATTTGACCGACCCTGCTCCTGCCACAAC  
ATTTGCACATTTGGACGCTACTACCGTACTTTCCAGAGGATAGCTTCCAAGGGTATTTATCCCGCAGTGGATCCTTTAG  
ATTCACCTCAACTATGTTACAGCCTCGGATTTGTTGGCAACGAACATTATGAAACTGCGCAAAGAGTTAAGGAAACTTTA  
CAACGTTACAAAGAACTTCAGGACATTATCGAATTTCTGGATTGGATGAATTATCGGAGGAGGATCGTTTTAACTGTAGC  
AAGGACGCAAAAATCGAGCGGTTCTTATCACAAACGTTCTTTGTGGCAGAAGTTTTTACCAGTTCTCCAGGAAAGTATG  
TTGGTCTTGCAAAAACAATTAGGGGATTTCAACTAATCTTTCCGGAGAATTAGACGGCCTACCCGAACAGGCTTTTTTAT  
TTAGTGGGGAACATCGATGAAGCTAGCACGAAAGCTATAAACTTAGAA-----GAGGAG---AGCAAATTGAAGAAA--  
-

ATGAAATTAATCTTTATGTACTGACTCCTAAACGAATTATTTGGGATTGTGAAGTGAAGAAATCATTTTTATCTACTAA  
TAGTGGCCAAATTTGGTGTATTACCAAACCACGCCCCATTAACACAGCTGTAGATATGGGTCTTTGAGAATACGC---  
CTCCTG-----

AACGACCAATGGTTAACGGCGGTTCTGTGGAGTGGTTTTGCAAGAATAGTTAATAATGAGATCATCATTTTTAGGAAATGA  
TGCAGAACTGGGTAGTGACATTGATCCAGAAGAAGCTCAACAGGCACTTGAAATAGCCGAAGCTAACTTGAGTAAAGCTG  
AAGGTACGAAAGAATTGGTTGAAGCGAAGCTAGCTCTCAGACGAGCTAGGATACGAGTCGAGGCTGTCAATTGGATTCCC  
CCATCCAAT-----ATGAAAAATGTAACCCATTCTTTTGTTTTT---TTA---  
GCTCACTGGCCATTGCTGGGAGTTTCGGGCTT---

AATACCGATATTTTAGCAACAAATCTAATAAATCTAACTGTAGTGGTTGGTGTATTGATTTTTTTTTGGAAAGGGAGTG--  
-----

TTAAAAGATTTATTAGATAATCGAAAACAGAGGATTTAAGTACTATTGAAATTCGGAAGAATTGCGTAAAGGGACCCT  
TGAACAACCTCGAAAAGCTCGTATTCGATTACAGAAAAGTCAACTGGAAGCAGATGAGTATCGAATGAATGGATACTCTG  
AAATAGAACGAGAAAAAGAAAATTTGATTAATGCTACTTCTATTAGTTTGGAAACAATTAGAAAAGTCTAAAAACGAAACC  
CTTTATTTTGAAAAACAAGGGCGATGAATCAGGTCCGACAACAGGGTTTTCCAACAAGCTGTACAAGGAGCTCTAGGAAC  
TCTGAATAGTTGTTG-----AATACCGAGTTACATTTCCGTACGATTCGTGCTAATATTGGCATTCTCGGGGCCATA-  
-----GAATGG---AAGAGA---

ATGAATCCACTAATTGCTGCTGCTTCCGTTATTGCTGCTGGATTGGCCGTAGGGCTTGCTTCTATTGGGCCCGGAGTTGG  
TCAAGGTACTGCTGCAGGACAAGCTGTAGAAGGTATTGCGAGACAGCCAGAAGCAGAAGGTAATAAAGAGGTACTTTAT  
TGCTTAGTCTAGCTTTTATGGAAGCTTTAACAATTTATGGACTGGTTGTGGCACTAGCGCTTTTATTTGCGAACCCTTTT  
GTT---ATGAATATTACA-----CCATGTTCCATTAACACTC---AAG---GGGTTA---

TATGATATATCGGGTGTAGAAGTAGGGCAACACTTCTATTGGCAAATAGGAGGTTTCCAAATTCATGCCCAAGTACTCAT  
CACTTCTTGGGTGCTAATTACTATTTTGTAGGTTCAAGTTATCATAGCTGTT---  
CGGAATCCACAACCATCCCGACCGATGGTCAGAATTTCTTCAATATGTCCTTGAGTTTATTGAGACTTGAGCAAAAC  
TCAGATTGGA---



GAAGAATATGGTCCCTGGGTTCCCTTTATTGGAACATATGTTCCCTTTTTATTTTTGTTTTCGAATTGGTCAGGTGCTCTTTT  
ACCTTGAAAATTATAGAGTTACCCCATGGGGAATTAGCAGCGCCACGAATGATATAAATACTACTGTTGCTTTAGCTT  
TACTAACATCAGCGGCATATTTTTATGCGGGTCTTAGCAAAAAAGGATTGAGTTATTTTCGAAAAATATATTAACCAACC  
CCAATCCTTTTACCTATTAACATCCTAGAAGATTTACAAAACCATTATCACTTAGTTTTCGACTTTTCGGAAATATATT  
GGCGGATGAATTAGTCGTTGTTGTTCTTGTCTTTAGTCCCCTTAGTAGTCCCTATACCGGTCATGTTTCTTGGATTAT  
TTACAAGCGGTATTCAAGCTCTTATTTTTGCAACGTTAGCCGCAGCCTATATAGGTGAATCCATGGAAGGTCATCAT---  
---  
ATGCTATTTGCAACTTTAGAACATATACTAACTCATATCTCTTTCTCAACCATTTCAATTGTGATTACGATTCATTTGAT  
AACC-----TTATTA---GTT-----  
CGTGAACCTTAGGGGATTACGTGATTCGTGAGAAAAGGAATGATAGCTACTTTTTCTCTATAACAGGATTTTTAGTCTC  
TCGTTGGGTTTTCTTCGGGACATTTCCATTAAGTAATTTATATGAGTCATTGATCTTCTTTTCATGGACTCTGTATATTC  
TTCATACTATTCCTAAG-----ATACAG---AACTCGAAAAATGAT---  
TTAAGCACAATAACTACGCCAAGTACTATTTAACGCAAGGCTTTGCCACGTCGGGTCTTTAACTGAAATGCATCAATC  
CACAATACTAGTACCTGCTCTACAATCTCAGTGGTTAATGATGCATGTCAGTATGATGTTACTAAGCTATGCAACTCTTT  
TGTGTGGATCCTTATTATCCGCCGCTCTTCTAATCATTAGATTTTCGAAAGAAT---TTCGATTTCTTTTCA-----  
CTAAAGAAAAATGTT-----TTT---CTTAAACATTTTTCTTTAGTGAGATTGAATATTTATAT-----  
GCAAAA-----AGAAGTGCTTTA-----AAA-----AACACCTCT-----TTTCCC-----  
-  
GTATTTCCAAATTATTACAAATATCAATTAACCTGAGCGTTTGGATTCTTGGAGTTATCGTGTCTATTAGTCTAGGGTTTAC  
TCTTTTAAACCGTGGGATTCTTTGTGGAGCAGTATGGGCTAATGAGGCATGGGGATCCTATTGGAATTGGGATCCTAAGG  
AAACTTGGGCATTTATTACCTGGACCATATTTGCAATATATTTACATAGTAGAAAA-----  
AATCCAAATTGGAAGGGT-----  
ACGAATCCGCACTTGTAGCTTCGATAGGATTTCTTATAATTTGGATCTGCTATTTTGGTATCAATCTGTTAGGAATAGG  
TTTACATAGTTACGGTTCATTTACATTACCATCTAAA-----  
-----ATG---AAAAAAAAG-----  
-----AAAGCATTGCCTTCTTTCTTA-----TATCTTGTATTTATCGTACTT-----  
TTGCCCTGGGGAGTCTCTTTCTCTTT-----  
AACAAATGTCTGGAACCTTTGGATTAAGAATTGGTGGAAATACCAGGCAATCCGAAACTTTCTTAACTGATATTCAAGAGAA  
AAGGATTTCTAGAAGGATTCATAGAATTAGAGGAACTTTTTCTCTTG-----  
GACGAAATGATAAAAAGAG---  
AAACCGAAGACACATGTACAAAAACTTCTATAGGAATACACAAGGAAATAATACAATTGGCCAAAATAGATAATGAGGA  
TCATCTCCATATCATTTTGCATTTCTCAACAAATATAATCTGTTTGGCTATTCTAAGTGGTTCTTTTTTTCTGGGTAAAG  
AAGAACTTGTCAATTTGAATTTCTGGGTTTCAGGAATTTTTCTATAACTTAAATGATTCAATAAAAAGCTTTTTTTATTCTT  
TTAGTTACTGATTTTTTTGTTGGATTTCACTCTACCCGCGGTTGGGAACCTAATTCGTTGGGTCTACAACAATCTTGG  
ATGGGCTCCTAACGAGCTA-----  
ATTTTCACTATTTTTGTTTGTAGTTTTCTGTGATTCTAGACACGTGTTTGAATTTTGGGTCTTTTTTTGTTTAAACCG  
TCTATCTCCTTCACTTGTAGTCATTTATCATTCAATTAGTGAAGCA-----  
ATGCCCATTTGGTGTTCAAAAGTACCTTACCGGATTCCC-----  
-----GGAGATGAAGAA-----  
--GCGACTTGGGTTGACTTATAACAATGTTATGTATCGAGAAAGGACACTT---  
TTTTTAGGTCAAGAGATTGTTGCGAGATCACAATCATA

Acorus

TTGTTGGTCTCATGGTATATCTCAGTATAGAGGATAAGACCAGGGATTTTTTTTTGTTTTATAAATTCTCCCGGCGGATGG  
GTAATTCGGGAATAGGTCTTTATGACACTATGCAA---  
TTTGTGCCACCCGATGTACATAACAATATGCATGGGATTAGCTGCTTCAATGGGATCTTTTATTCTTGTGCGGAGGAGAAAT  
TACCAAACGTCTAGCATTCCCTCACGCT---AGGGTTATGATCCACCAACCTGCCAGTTCTTTT---  
TATGAGGCACAAGCAGGGGAATTTGTCCTGGAAGCGGAAGAAGTATTGAAACTTCGCGAAACCCTCACAAGAGTTTACGT  
ACAAAGAAGTGGTAAACCATTATGGGTTGTATCCGAA---  
GATATGGAAAGGGATGTTTTCTGTGAGCAACAGAAGCCCAAGCTCATGGTATTGTTGATCTTGTAGGGGACGAA-----  
-----ATG---AAAGAA-----CAAAA-----  
-----TTGATTCAT---GAAGGTTTAATTACTGAATCA---CTTCCTAATGGT-----  
ATGTTTTGGGTGCGTTTATGATAATGAAGATCTGGTTCTAGGTTATATTTCTGGAAGG-----  
ATCCGACGCAGTTCTATACGGATACTACCGGGA-----  
GATAGAGTAAAAATCGAAGTAAGTCGTTATGATTCAACCAGAGGACGCATAATTTATAGACTTCGC-----  
-----AATAAAGATTTCGAACGAGTAA-----  
-----

-----ATGGAA-----GAATTCAAAGTC-----TATTTTCGAA-----  
AAAGATGGGTCTCGTCAACAATACTTC-----  
CTATATCCACTTCTCTTTTCAGGAGTACATCTACGCACTTGTCTATAATCATGTTTTA-----AATGGA-----  
-TTG-----ATTTTTTACGAATCCTCGGAAAAT---TTCGTTTTAT-----  
GATAATAAATTTAGTTTTAATAATTGTAAAACGTTTTAATTACTCAAATGTATCAA-----  
CAGAATTCCTTTGAGTAATTTGGTTAATGAT-----TCTAACCGAAATCGATTAGTTTCGGCAAAAC-----AAGAAT--  
-----TTTTATTATCAAACGATATTAGAGGGTTTTTCAGTCATTATGGAAATTCATTCTCCATAATATTT---  
TTATCTTCCGTT-----GAAGAAAAAAA-----GCAAAAATACCAAAAATTCAG-----AATTTACGA--  
-----  
TCTATTCATGCAACATTTCCCTTTTTAGAAGACAAATTATCACATTTAAATCATGTATCAGATATATTAATACCCTATCC  
CATCCATCTCGAAATCCTGGTTCAAGTTCTGCAAGGCTGGATACAAGATGTTCCGTTCTTTACATTTATTGCGGTTCTTTTC  
TCCATGAGTTTTATAATTGGAATAGTCTC---ATTACT-----CCAAAGAAATCCATTTCTTTTCTTTTTTCA---  
-----AAGGGGAAT---  
CAAAGACTCTTCTTGTCTTATATAATTCTTATGTATTTGAGTGTGAATCCGCATTAGTCTTTCTCCGTAAACAATCCTT  
T---TATTTACGATCAACATCTTTTGGAACTTTGTTGAGCGAACACATTTCTATGGAAAAATAGAGCAT-----  
-----ATTGTAGTA-----GTG-----CGT---AGG---AAGAATTTTCAAAGGCC-----  
TTATCTTTGTTCAAAGATCCTTTTCATCCATTATATCCGATATAAAGGAAAATCAATTCTGGCTTCAAAGGGGACTCATT  
TCTGATGAAGAAATGGAAATATCACCTTCTAAATTTCTGGCAATGTCATTTTGACTTTTGGTCTCAACCGCATAGGATTC  
ATATAAACCAATTA-----TCAAATCATTCTTTCTATTTTTATGGGCTATCTG-----  
TCAAGTGTACGAATCAATTTTTTCGACGGTAAGGAGTCAAATGCTAGAGAGTTTCATTTCTAATGGATACTCCTACTAAAA  
ATTCGATACTATAGTCCCAATTATTCCTCTAATCGGATCATTGGCTAAAGCTAAGTTTTGTAACGTATCGGGGCATCCTG  
TTAGTAAGCCGGTCTGGGCTGATTTGTGAGATGCTGATATTATTGATCGATTTGGACGAATATGTAGAAATCTTTCTCAT  
TATCACAGTGA---  
TCCTCAAAAAACAGAGTTTGTATCGAGTAAAGTATATACTTCGCCTTTTCGTGTGCGAGAACTTTGGCCCGTAAACATAA  
AAGTACAGTG---CGCGCTTTTTTC-----AAACGATTAGGTTTCAGAA---TTCTTAGAAGAATTCTTTACGGAT-  
-----AAAGAACAAGTTCTTTCTTTGATCTTCCCT-----TCCCTT---CGTTCACCTTCACACAGG-----  
GTCCATAAA---GGAGAACGTATTTGGTATTTGGATATTATCCGTATCAAT-----GACCTGGTGAAT-----  
-----  
-----ATGATAATTGCT-----ACGACAGAAATA---CAA---GCT-----  
ATCAATTCTTTTTCTAGATCGGAATCCTTATCCTTAAAGAGGTCTACGGACTCATATGGCTGCTTGTACCTATTTTTAC  
TCTTATATTGGTAATTATAATAGGGGTAAGTACTAGTATTGTTTGGTTGGAAAGAGAAATATCTGCGGGGATACAACAACGTA  
TTGGGCTGAATATGCCGGCCATTGGGAATTTCTCAAGCTCTAGCGGATGGAACCAAATGCTTTTTCAAAGAAGATCTT  
CTCCCATCTAGAGGAGATATTAGTTTATTTCAGCCTCGGGCCGTCTATAGCGGTCATATCAACTCTACTAAGTTATTTAGT  
AATTCCTTTTGGCTATCACCTTGTTTTAGCTGATCTCAGTATCGGCGTTTTTTTTATGGATTGCCATTTCAAGTATTGCTC  
CTATTGGACTTCTTATGTCAGGATATGGCTCGAATAATAAATATTCCTTTTTCAGGTGGTCTACGAGCTGCCGCTCAATCT  
ATTAGTTATGAAATACCATTAACTCTA---  
TGTGTATTATCAATATCTCTACTATCTAATAGTTCAAGTACAGTTGATATAGTTGAGGCACAGTCAAAAATATGGTTTTTG  
GGGATGGAATCTGTGGCGTCAACCTATAGGATTTTTAGTTTTCTAGTTTTCTTCTCTAGCCGAATGTGAAAGATTACCCT  
TTGATTTACCAGAAGCAGAGGAAGAATTAGTAGCAGGTTATCAAATGAATATTCAGGCATCAAATTTGGTTTTATTTAC  
GTTGCTTCTTACCTAAATCTACTAGTTTCTTCATTATTCGTAACAGTTCTTTACTTAGGCGGGTGAATCTCTCT---  
ATTCATACATATTTATTCCTGAACTTTTTCGGA-----  
AAAAACAAAACAGGTGGAATCTTTGGAATGACAATTGGTATCCTAATTACATTAGCTAAAGCTTATTTGTTCTGTTTCAT  
TTCTATCGCAACAAGATGGACTTTACCTAGGTTAAGAATAGACCAACTATTAATCTTGGATGGAAATTTCTCTTACCTA  
TTTCCCTCGGTAATCTATTATTGACAACCTCTTCCCAACTTGTTTTCACTATA-----  
-----  
ATGATCTGGCATGTACAGAATGAAAACCTTCAATCTCGATTCTACGAGAATTTTTATGAAAGCGTTTCATTTGCTTCTCTT  
CGATGGAAGTTTTCATTTTCCAGAATGTATCCTAATTTTTGGCCTAATTTCTTCTTCTGATGATCGATTCAACCTCT----  
--  
GATCAAAAAGATAGACCTTGGTTCTATTTTCATATCTTCAACAAGTTTTAGTAATGAGCATAGCGCCCTATTGTTCCGATG  
GAGAGAAGAACCTATGATTAGCTTTTCGGGAAATTTCCAAACGAACAATTTCAACGAAATCTTTCAATTTCTTATTTTAC  
TATGTTCAAATCTATGTATTCCTCTATCCGTAGAGTACATTGAATGTACAGAAATGGCTATAACAGAATTTCTGTTATTC  
GTATTAACAGCTACTCTAGGAGGAATGTTTTTATGTGGTGCTAACGATTCAATAACTATCTTTGTAGCTCCAGAATGTTT  
TAGTTTATGCTCCTACCTCTTATCTGGATATAACCAAGAGAGATGTACGGTCTAATGAGGCTACTATGAAATATTTACTCA  
TGGGTGGGGCAAGCTCTTCTATTCTGGTTTCATGGTTTTCTTGGCTATATGGTTTTATCCGGGGGGGAGATCGAGCTTCAA  
GAAATAGTGAATGGTCTTATCAATACACAAATGTATAACTCCCCGGAATTTCAATTGCGCTTATATTCATCACTGTAGG  
AATTGGGTTCAAGCTTTCCCTAGCCCTTTTCATCAATGGACTCCTGACGTATACGAAGGATCTCCCACTCCAGTCGTTG

CTTTTCTTTCTGTTACTTCGAAAGTAGCTGCTTCAGCTTCAGCCACGCGAATTTTCGATATTCCTTTTTATTTCTCATCA  
AACGAATGGCATCTTCTTCTGGAAATCCTAGCTATTCTTAGCATGATATTGGGGAAT

Amborella

TTGTTGGTCTCATGGTATATCTCAGTATAGAGGATGATACCAGGGATCTCTATTTGTTTATAAACTCTCCCGGCGGATGG  
GTAATACCAGGAATAGCTATTTATGACGCTATGCAA---

TTTGTACCGCCAGACGTACATACGATATGCATGGGATTAGCCGCTTCAATGGGATCTTTTCGTCCTGGCCGGAGGAGAAAT  
TACCAAACGTCTAGCATTCCCTCACGCT---AGGGTTATGATCCACCAACCCGCTAGTTCTTTT---

TATGAGGCACCAGCAGGAGAATTTATCCTGGAAGCGGGGAGCTACTGAAACTTCGCGAAACCATCACAAGCGTTTATGT  
ACAAAGAACAGGCAACCCTTTATGGGTTGTATCCGAA---

GACATGGAAAGGGATGTTTTTATGTGACGACAGAAAGCTCATGGCATTGTTGATCTTATAGCAGTCGAAAATAC  
CTGGGATTTCCCG-----ATG---AAAGAA-----CAAAAA-----

-----TTAATTCAT---GAAGTTTTAATTACTGAATCA---CTTCCCAATGGC-----  
ATGTTCCAAGTTTCGTTAGATAATGGAGACCTGGTTCTAGGTTATGTTTTAGGAAAGG-----

ATCCGACGTAGTTTTATACGGATATTACCAGGC-----  
GATAGAGTGAAAATTGAAGTAAGTCGTTATGATTCAACCAGGGGACGTATTATTTATAGGCTTCGC-----

-----AACAAAGATTTCGAATGATTAG-----  
-----ATGGAG-----GAATTACGAGGA-----TATTTAGAA-----

ATAGATAGACCCCATCAACAACGCTTC-----  
CTATATCCGCTTCTATTCCAGGAGTCTATCTATGCACTTGCTCATAATCATGGTTTA-----AATGGA-----

-TCA-----ATTCTTTACGAACCCATGGAAGAT---TTAGGTCAT-----  
GACAAGAAATCCAGTTCACTAAATGTAAAACGTTTAATTATTCAAATGTATCAA-----

CAGAATCATTTCATCATTTCATTTAATGAT-----TCTAACCAAAATAGATTTCTTGGGCATAGC-----AGGAAT--  
-----TCTTATTTTCAAATGGTATCAGAGGGTTTTGCAGTAATTGTGGAAATTCCATTCTCGATGCGATTA---

GTATCTTCCCTA-----GAAAA-----GGATCT-----GAATCTCAT-----AATTTCCAA--  
-----

TCTATCCATTCAATATTTCCGTTTCTAGAGGACAAACTTTTCATATTTAAATATGTGTTAGATATACTAATACCCACCC  
AATCCATCTGGAAATCTTGGTTCAAAGCCTTCGCCAATGGATACGAGACCTTCTTCTTTGCATTTATTGCGGTTTTTTC

TCCACGAACATCAGAATTGGAATAGTTTT---ATTACTACA---AATACAAAGAAATGCAGTTCTTTT---TTTTCA---  
-----AGAGAGAAT---

CAAAGATTGTTTTTGTTCCTGTACAATTTTCATGTATATCAATTTGAATCCCTTTTCGTTTTCTACGTAAACAATTTTT  
T---CATTTACGGTGCATATCTTTTGGATCTTTTCTTGAACGAACACATTTCTATGGAAAAATAGAAAAT-----

-----TTTGTAGTA-----TCC-----ATG---CGT---AATCATTCTCAGAATATT-----  
TTATGGTTGTTCAAGGACCTTTTCATGCATTATGTTAGATATAAAGGAAAATCAATTATGGCTTCAAGGGGTACTTATCT

CCTTATGAATAAATGGAAATCTCACCTTGTCAATTTCTGGCAATTCCGTTTTTACTTCTGGTCTCAACCGGGCAGAATCC  
ATATAAATGAATTA-----TCCAATCATTCTTCTATTTCCCGGGCTATCTT-----

TCAGGTCTACGATTAATCCCTCGATGGTAAGGAGTGAATGCTAGAGAATTCATTTATGATAGATGCTGTTATCAAGAG  
ATTCGATACAGTAGTCCCAACTATTTTTCTTATTGGATCCTTGGCTAAAGTAAAATTATGTAACGTATCAGGGCATCCTA

TTAGTAAGTCGGTCTGGGCCGATTTCGTGATTTCTGATATTCTCGATCAATTTGGGCGGATATGCAGAAATCTCTCTCAT  
TATCACAGTGGG---

TCCTACAAAAAACACAGTTTGTGTCGAATAAAATATATACTTCGACTTTTCGTTGCTAGAACTTTGGCTCGTAAACATAA  
AAGCACGGTA---CGCGCAATTTG-----AAAAGATTAGGTTTCGGAA---TTCTTGGACGAATTCCTTACGGAG-

-----GAACAAGAGATTCTTTCTTGGATTTTCCA-----AAAACC-----CCTTTCCATAGT-----  
-----GGACGAATTTGGTATTTGGATATTATCCGTATTCTAT-----AGTCTGGCCAATCAT-----

-----ATGATAATTGAT-----ACGACAGAAGTA---CAA---GCT-----  
ATCAATTTCTTTTCCAGATTGGAATCGTCA-----

AAAGAGGTCTATGGTCTGATATGGCTATTTATCCCTATTTTTACTCCTGTATCAGGGATCACAATAGGGGTATTGGTTAT  
TGTGTGGCTAGAAAGAGAAATATCTGCAGGGATACAACAACGCATTGGACCTGAATACGCTGGTCTTTGGGGATTCTTC

AAGCTATAGCAGATGGGACCAAATTACTTTTTCAAAGAGGATCTTCTCCCATCTAGAGGAGATATTCGTTTATTCAGTATC  
GGGCCTTCTGTAGTGGTCAATATCAATTTTACTAAGTCATTTGGTAATTCCTTTTCGTTTATCGCCTTGTCTCGCCGATCT

AAGTATAGGTGTTTCTCTATGGATCGCAATTTCCAGTATTGCTCCTATTGGACTTCTTATGTCAGGATATGCATCAAATA  
ATAAATATTCTTTTTTCAGGTGGTCTACGAGCTGCTGCTCAATCTATTAGTTATGAAATACCGTTAACTCTG---

TGTGTGTTATCAATATCTCTACTATCTAACAGTTCAAGTACGGTTGATATAGTGGAGGCACAGTATAAATATGGTTTTTG  
GGGGTGAATCTGTGGCGTCAACCTATAGGGTTTCTAGCTTTTCTAATTTCTTCTTAGCGGAATGTGAGAGGTTGCCCT

TTGATTTACCAGAAGCGGAGGAAGAATTAGTAGCGGGTTATCAAACCGAATATTTCAGGTATTAATTTGGTTTTATTTAT  
CTTGCTTCTTACCTAAATCTACTAGTTTCTTCAATTTTGTAAACGGTTCTTTATTTGGGTGGGTGGAATCTTTCT---

ATTCCATACATAGCAATTCCTGAGCTTTTCAGA-----  
ATAAATAGAATTGGTGGAGTTTTTGGAAACAACAATTAGTATCTTTTTTACATTAGCTAAAGCTTATTTGTTCTGTTCAT  
TCCTATCACAACAAGATGGACTTTACCTAGGATGAGAATGGACCAACTATTAATCTTGGTTGGAAATTTCTTTTACCTA  
TTGCTCTAGGTAATCTATTACTGACAACCTTCTCCCAACTTTTTTCGCTGTAA-----

ATGATCTGGCATGTACAGAATGAAAACCTTCATTCTCGATTCTACGAGAATTTTTATGAAAGCCTTTCATTTGCTTCTCTT  
CCATGGAAGTTTCATTTTCCCAGAATGTATCCTAATTTTTGGCCTAATCTTCTTCTAATGATCGATTCAACCTCT----

-----  
GATCAAAAAGATAGACCTTGGTTCTATTTTCATCTCTTCAACAAGTTTAGTAATGAGCATAACGGCCCTATTGTTCCGATG  
GAGAGAAGAACCTATGATTAGCTTTTCGGGGAATTTCCAAACGAACAATTTCAACGAAATCTTTCAATTTCTTATTTTAC  
TATGTTCAACTCTATGTATTTCTCTATCAGTAGAGTACATTGAATGTACAGAAATGGCTATAACAGAGTTTTCTGTTATTC  
GTATTAACAGCTACTCTAGGAGGAATGTTTTATGTGGTGCTAACGATTTAATAACTATCTTTGTAGCTCCAGAATGTTT  
CAGTTTATGCTCCTACCTATTATCTGGATATACCAAGAGAGATGTACGGTCTAATGAGGCTACTACGAAATATTTACTCA  
TGGGTGGGGCAAGCTCTTCTATTCTGGTTTCATGGTTTTCTTGGCTATACGGCTCATCCGGGGGAGAGATCGAGCTTCAA  
GAAATAGTGAATGGTCTTATCAATACACAAATGTATAACTCCCCGGGAATTTTCGATTGCGCTTCTATCCATCACTGTAGG  
AATTGGGTTCAAGCTTTCCCAGCCCTTTTCATCAATGGACTCCTGACGTATACGAAGGATCTCCCCTCCAGTCGTTG  
CTTTTCTTTCTGTTACTTTCGAAAGTAGCTGCTTCAGCTTTAGCCACTCGAATTTTCGATATTCCTTTCTATTTCTCATCG  
AACGAATGGCATCTTCTTCTTGAATCCTAGCTATTCTTAGCATGATATTGGGGAAT

Arabidopsis

TTATTAGTCTTATGATATATCTCAGTATAGAAAAGGATACCAAAGATCTTTATTTGTTTATAAACTCTCCTGGTGGATGG  
GTAATATCTGGAATGGCTATTTATGATACTATGCAA---  
TTTGTGCGACCCGATGTACAGACAATATGCATGGGATTGGCCGCTTCAATAGCATCCTTTATCCTAGTCGGAGGAGCAAT  
TACCAAACGTATAGCATTCCCTCACGCT---AGGGTAATGATCCATCAACCCGCTAGTTCGTTT---  
TATGAGGCACAAACGGGAGAATTTATCTTGGAAAGCGGAAGAATTACTTAAACTTCGCGAAACCATCACAAGGGTTTATGT  
ACAAAGAACGGGCAAACCTATATGGGTTATATCCGAA---  
GACATGGAACGGGATGTTTTTATGTCTAGCAACAGAAGCCCAAGCTCATGGAATTGTTGATCTTGTAGCGGTTCAA-----

-----  
ATGTGTCATTTTCAGAACTCAAGAAAATAAAGACTTTACCTTCAGTTCAAATCGAATTTCAATCCAAATGGAT-----  
----AAATTTCAAGGA-----TATTTAGAG-----TTCGATGGGGCTCGGCAACAGAGTTTT-----  
CTATATCCACTTTTTTTTTCGGGAGTATATTTATGTACTTGCTTATGATCATGGTTTA-----  
AATAGATTAATAGAAA-TCGCTAT--ATTTTC-----TTGGAAAAT---GCGGATTAT-----  
GACAAAAAATATAGTTCACTAATTACGAAACGCTTAATTTTGCGAATGTATGAA-----  
CAGAATCGTTTTGATTATTTCCCACTAAGGAT-----GTGAACCAAAATTCCTTTTTGGGGCATAACC-----AGTCTT--  
-----TTCTATTATCAAATGATATCTGTTTTATTTGCAGTGATTGTGCGAAATTCATTTTCCCTAAGATTA---  
GGATCCTCTTTT-----CAAGGA-----AAACAATTAATAAATCTTAT-----AATTTACAA--  
-----

-----  
TCAATTCATTCAATATTTCCCTTTTTTAGAAGACAAATTAGGACATTTTAATTATGTGTTAGATGTACTAATACCTTACCC  
CATCCATCTAGAAATCTTGGTTCAAACCCTACGTTACCGGGTAAAAGATGCCTCTTCTTTGCATTTTTTTTCGGTTCTGTT  
TATACGAGTATTGTAATTGGAAGAATTTT---TATATT-----AAAAAAAATCAATTTTG-----  
-----AAT---

CCAAGATTTTTCTGTTCTTATATAATTCTCATGTATGTGAATACGAATCCATCTTTTTTTTTTCTACGCAAGCGGTCTTCTC  
G---CATTTACGATCGACATCTTATGAAGTCCTTTTTGAGCGAATTGTATTCTATGGAAAAATACACCAT-----  
-----TTTTTCAA-----GTT-----TTT---GTT---ATAATTTTCCGGCAATC-----  
CTAGGGTTGCTCAAGGATCCTTTTCATACATTATGTTAGATATCACGGAAGATGCATTCTGGCAACAAAGGATACGCCGCT  
TCTGATGAATAAATGGAAATATTATTTGTTAATTTATGGCAATGTTATTTTTCGGTATGGTTTCAATCGCAAAAGGTCA  
ATATAAATCAATTA-----TCTAAAGATAATTTAGAGTTTCTGGGTTATCTG-----  
TCAAGTTTGGGATTAACCCTTTAGTGGTACGTAGTCAAATGCTAGAAAACCTCATTTCTAATAGATAATGTTAGAATCAA  
ATTGGATAGCAAAATCCAATTTCTTCTATTATTGGATCGTTGGCTAAAGATAAATTTTGTAAATGATTAGGGCATCCCA  
TTAGTAAAGCAACCTGGACGGATTTCATCAGATTCTGATATTCTCAACCGATTTGTGCGGATATGCAGAAATATTTCTCAT  
TATTACAGCGGA---  
TCTTCAAAAAAAGAATTTGTATCGAATAAAATATATACTTCGTCTTTGTTGTGTTAAACTTTGGCTCGTAAACACAA  
AAGTACTGTA---CGCACTTTTTTA-----AAAAGTTGGGCTCTGGT---TTATTGGAAGAATTCCTTACGGG-

-----GAAGACCAAGTTCTTTCTTTAATCTTCCCA-----AGAAGT---TATTATGCTTCTAAAAGA-----  
TTATAT-----CGAGTGCGAATTTGGTATTTGGATATTCTTTATCTTAAT-----GATTTGGTCAATCAT-----

-----ATGATAATTTAT-----GCAACAGCAGTC---CAA---ACT-----

ATAAATTCCTTTTGTTAAATTGGAATCTTTA-----

AAAGAGGTCTATGGACTCATATGGATATTTGTCCCTATATTTTCTCTTGTATTGGGAATCATAACAGGTGTACTAGTAAT  
TGTGTGGTTAGAAAGAGAAATATCTGCAGGGATACAACAACGTATTGGACCTGAATACGCCGGCCCGTTGGGAATCTTC  
AAGCTCTAGCCGATGGGACAAAACACTTTTCAAAGAAAATCTTCGTCCATCTAGAGGAAATACTCCTTTATTTAGTATT  
GGACCATCTATAGCAGTTATCTCTATTTTACTAAGTTATTCAGTAATCCCTTTAGCAATCACCTTGTTTTAGCGGATCT  
CAATATCGGTATTTTTTATGGATTGCCATCTCAAGTATTGCTCCTATTGGACTTCTTATGTCAGGATATGGATCAAATA  
ATAAATATTCCTTTTTTAGGTGGTCTGCGAGCTGCTGCCAATCGATTAGTTATGAAATACCATTAECTA---  
TGTGTTTTATCAATATCTCTACTATCTAACAGTTTAAGTACAGTTGATATAGTTGAGGCACAATCAAATATGGTTTTTG  
GGGATGGAATTTGTGGCGTCAACCTATAGGTTTTATCATTTTTCTAATTTCTTCCCTAGCAGAATGCGAGAGGTTACCGT  
TTGATTTACCAGAAGCGGAAGAATAATAGCAGGTTATCAAATGAATATTCAGGTATAAAATTTGGTTTTATTTTAC  
GTTGCTTCTTATCTAAATCTATTAATTTCCCTCATTATTTGTAACAGTTCTATACTTAGGCGGTTGGAATATTTCT---  
ATTCCGTATATATCTATTCTGGAGCTATTTCAA-----  
AGGGATCAAATTTTTGGAACAACAATTGGTATCTTTATTACATTAGCTAAAACCTATTTGTTTTTGTTCGTTTTCTATCGC  
AACAAGATGGACTTTACCTAGGCTAAGAATGGATCAACTATTAATCTTGGATGGAATTTCTTTTACCTATTTCCCTTG  
GTAATCTATTATTAACCACTTCTTTCCAACCTCTTTTCACTCTAA-----

ATGATCTGGCATGTACAGAATGAAAATTTCACTTCTCGATTCTACGAGAATTTTTATGAAAGCCTTTCATTTGCTTCTCTT  
CGATGGAAGTTTTATTTTCCCAGAATGTATCCTAATTTTTGGCCTAATCTTCTTCTGATGATCGATTCAACCTCT----

---  
GATCAAAAAGATATACCTTGGTTATATTTTCACTCTTCAACAAGTTTCGTAATGAGCATAACGGCCCTATTGTTCCGATG  
GAGAGAAGAACCTATGATTAGCTTTTCCAGGAAATTTCCAAACGAACAATTTCAACGAAATCTTTCAATTTCTTATTTTAC  
TATGTTCAACTCTCTGTATTTCTCTATCCGTAGAGTACATTGAATGTACAGA-  
ATGGCTATAACAGAGTTTCTGTTATTCATATTAACAGCTACTCTAGGAGGAATGTTTTTATGTGGTGCTAACGATTTAAT  
AACTATCTTTGTAGTCCAGAATGTTTCAGTTTTATGCTCCTACCTATTATCTGGATATACCAAGAAAGATATACGATCTA  
ATGAGGCTACTATGAAATATTTACTCATGGGTGGGGCAAGCTTCTTATTCTGGTTCATGGTTTTCTTGGCTATATGGT  
TCATCCGGGGGAGAGATTGAGCTTCAAGAAATAGTGAATGGTCTTATCAATACACAAATGTATAACTCCCCAGGAATTTT  
AATTGCGCTTATATTCATCACTGTAGGAATTTGGGTTCAAGCTTTCCCTAGCCCCTTCTCATCAATGGACTCCTGACGTAT  
ACGAAGGATCTCCCACTCCAGTCTGTTGCTTTTCTTTCTGTTACTTCGAAAGTAGCTGCTTCAGCTTCAGCCACTCGAATT  
TTGATATTCCTTTTTTATTTCTCATCAAATGAATGGCATCTTCTTCTGGAAATCCTAGCTATTCTTAGCATGATATTCGG  
GAAT

Atropa

TTATTGGTCTTATGGTATATCTCAGTATCGAGGATGAGACCAAAGAGCTGTATTTGTTTTATAAACTCTCCTGGGGGCTGG  
GTAATACCTGGGATCGCTATTTATGATACTATGCAA---  
TTTGTGCGACCAGATGTCCATACAGTATGCATGGGATTAGCCGCTTCAATGGGATCTTTTATCCTGGTTCGGAGGAGAAAT  
TACCAAACGTCTAGCATTCCCTCACGCT---AGGGTAATGATGCATCAACCTGCTAGTGGTTAT---  
TATGAGGCACAAACAGGCGAATTTGTCTGGAAGCGGAAGAAGTGTGAAACTGCGTGAAACCCTCACAAGGGTTTATGT  
ACAAAGAACGGGCAAACCTTATGGGTTGTATCCGAA---  
GATATGGAAAAAGATGTTTTTATGTCAGCAACAGAAGCCCAAGCTTATGGAATTGTTGATCTTGTAGCGGTTGAA-----

-----ATGGAA-----GAAATCCAAAGA-----TATTTACAG-----

CCAGATAGCTCGCAACAACACAACCTTC-----

CTATATCCACTTATCTTTTCCAGGAGTATATTTATGCACTTGCTCATGATCATGGTTTA-----AATATA---AATAGG---

-TCG-----ATTTTG-----TTGGAAAAT---CCAGGTTAT-----

AACAATCAATTTAGTTTACTAATTGTGAAACGTTTAAATTAATCTCGAATGTATCAA-----

CAGAATCATTTTCTTATTTCTACTAATGAT-----TCTAACAAAAATACATTTTTGGGGTGCAC-----AAGAGT---

-----TTGATTTCTCAAATGATATCAGAGGGATTTGCATTTATTGTGGAATTTCCATTTTCTCTACGATTA---

ATATCTTCTTTATCTTCTTTTCAAGGC-----AAAAAGATTTTAAATCTCAT-----AATTTACGA---

-----

TCAATTCATTCAACATTTTCTTTTTTAGAGGACAATTTTTTACATCTAAATTATGTATTAGATATACTAATACCCTATCC  
CGTTTCATCTGGAAATCTTGGTTCAAACCTCTTCGCTATTGGGTAAAAGATGCCTCTTCTTTACATTTATTACGATTCTTTC  
TCCACGAATATTGGAATTTGAATAGTCTT---ATTACT-----TCAAAGAAGCCCGGTTACTCC---TTTTCA---  
-----AAAAAAAT---  
AAAAGATTCTTCTTTTTCTTATATAATTCTTATGTATATGAATGCGAATCCACTTTTCGTCTTTCTACGGAACCAATCTTC  
T---CATTTACGACCAACATCTTTTTGGAGCCCTTCTTGAACGAATATATTTCTATGGAAAAATAGAACGT-----  
-----CTTGTAGAA-----GTC-----TTT---GCT---AAGGATTTGCAGGTTACC-----  
CTATGGTTATTCAAGGATCCTTTTCATGCATTATGTTAGGTATCAGGGAAAATCAATTCTGGCTTCAAAGGGGACGTTTCT  
TTTGATTAATAAATGGAAATTTTACCTTGTCAATTTTTGGCAATGTCATTTTTCTCTGTGTTTTTACACAGGAAGGATCC  
ATATAAACCAATTA-----TCCAACCATTCCCCTGACTTTATGGGCTATCTT-----  
TCAAGTGTGCGACTAAATCCTTCAATGGTACGTAGTCAAATGTTAGAAAATTCATTTATAATCAATAATGCAATTAAGAA  
GTTTCGATACCCTTGTTCCAATTTTCTTTGATTGGATCATTAGCTAAAGAAAACCTTTTGTACCGTATTAGGGCATCCCA  
TTAGTAAACCGGTTTGGTCCGATTTATCAGATTCTGATATTATTGACCGATTTGGGCGTATATGCAGAAATCTTTTTCAT  
TATTATAGCGGA---  
TCTTCCAAAAAAGACTTTTATATCGAATAAAGTATATACTTCGACTTTCTTGTGCTAGAACTTTAGCTCGGAAACACAA  
AAGTACTGTA---CGCACTTTTTTG-----AAAAGATCGGGCTCGGAA---TTATTGGAAGAATTCTTAACGTCG-  
-----GAAGAACAAGTTCTTTCTTTGACCTTCCCA-----CGAGCT---TCTTCTAGTTTTGTGGGA-----  
GTATAT-----AGAAGTCGGATTTGGTATTTGGATATTTTTTGTATCAAT-----GATCTGGCGAATTATCAA-----  
-----

-----ATGATAATTGAT-----ACAACAGAAATA---GAG---ACT-----

ATCAATTCCTTTTTCCAAATTGGAATCCTTA-----

AAAGAAGTCTATGGAATCATATGGATGCTTGTCCCTATTTTTGACTCTTGTATTAGGAATCACAATAGGTGTACTAGTAAT  
TGTTTTGGTTAGAAAGAGAAATATCTGCAGGAATACAACAACGTATCGGACCTGAATATGCCGGCCCTTTAGGAATCTTC  
AAGCTCTAGCAGATGGGACAAAACCTACTTTTTAAAGAGAACCTTATTCCATCTACAGGAGATCCTCGTTTATTTCAGTATC  
GGACCATCCATAGCAGTAATATCTATCTTTCTAAGTTATTTCAGTAATTCCTTTTGGTGATCACCTTGTTCAGCCGATCT  
TAGTATTGGTGTTTTTTTATGGATTGCCATTTCAAGTGTGCTCCCGTTGGACTTCTTATGTCAGGATATGGATCAAATA  
ATAAATATTCCTTTTTTAGGTGGTCTACGGGCAGCTGCCCAATCAATTAGTTATGAAATACCATTAGCTCTA---  
TGTGTGTTATCAATATCTCTACTATCTAACAGTTCAAGTACAGTTGATATAGTGAAGCGCAGTCAAAAATATGGTTTTTT  
AGGGTGAATTTGTGGCTCAACCCATCGGGTTTATCGTTTTTCTAATTTCTTCTAGCCGAGTGTGAAAGATTACCTT  
TTGATTTACCAGAAGCAGAAGAAGAAATAGTAGCAGGGTATCAAACCGAATATTCAGGTATCAAATTTGGTTTTATTTTAC  
ATTGCTTCATATCTGAATCTACTAGTTTCTTCATTATTTGTAACAGTTCTTTACTTGGGAGGTTGGAATCTTTCT---  
ATTCCGTACATATTTGTTCCCTGAGTTATTTGGC-----  
ATAAATAAAAGGGGTAAAGTCTTTGGAACATTAATTGGTATCTTTATTACATTAGCCAAAACCTTATTTGTTTTTGTTCAT  
TCCTATTGCAACAAGATGGACTTTACCGAGGCTGAGAATGGACCAACTATTAATCTTGGATGGAAATTTCTTTTACCTA  
TTTCTCTAGGTAATCTATTATTGACAACCTTCGTCCCAACTTCTTTTATTGTAA-----  
-----

ATGATCTGGCATGTACAGAATGAAAACCTTCATTCTCGATTCTACGAGAATTTTTATGAAAGCCTTTCATTTGCTTCTCTT  
CGATGGAAGTTTGATTTTCCAGAATGTATCCTAATTTTTGGCCTAATCTTCTTCTGATGATCGATTCAACCTCT----  
--

GATCAAAAAGATATACCTTGGTTATATTTTCATCTCTTCAACAAGTTTGTAGTAATGAGCATAACGGCTCTATTGTTCCGATG  
GAGAGAAGAACCTATGATTAGCTTTTCGGGAAATTTCCAAACGAACAATTTCAACGAAATCTTTCAATTTCTTATTTTAC  
TATGTTCAACTCTATGTATTCCTCTATCCGTAGAGTACATTGAATGTACAGAAATGGCTATAACAGAGTTTCTCTTATTC  
GTATTAACAGCTACTCTAGGGGGAATGTTTTTATGCGGTGCTAACGATTTAATAACTATCTTTGTAGCCCCAGAATGTTT  
CAGTTTATGCTCCTACCTATTATCTGGATATACCAAGAAAGATGTACGGTCTAATGAGGCTACTATGAAATATTTACTCA  
TGGGTGGGGCAAGCTCTTCTATTCTGGTTTCATGGTTTTCTTCTTGGCTATATGGTTTCATCCGGGGGAGAGATTGAGCTTCAA  
GAAATAGTAAACGGTCTTATCAATACACAAATGTATAACTCCCCAGGAATTTCAATTGCGCTCATATTCATTACCGTAGG  
AATTGGGTTCAAGCTTTCCCGAGCCCTTCTCATCAATGGACTCCTGACGTATACGAAGGATCTCCCACTCCAGTCGTTG  
CTTTTCTTTCTGTTACTTCGAAAGTAGCTGCTTCAGCTTCAGCCACTCGAATTTTTCGATATTTCTTTTTATTTCTCATCA  
AACGAATGGCATCTTCTTCTGGAAATCCTAGCTATTCTTAGCATGATATTGGGAAAT

Buxus

TTATTGGTCTCATGGTATACCTTAGTATAGAGGATGATACCAAGGATTTGTATTTGTTTTATAAACTCTCCCGGCGGATGG  
GTAATACCCGGAATAGCGATTTATGATACTATGCAA---

TTTGTGCCACCAGATATACATACGATATGCATGGGATTAGCCGCTTCAATGGGATCCTTTCTCCTGGTAGGAGGAGAAAT  
TACCAAACGTCTAGCATTCCCTCACGCT---AGGGTAATGATCCATCAACCTGCTAGTTCTTTT---

TATGAGGCACAAACAGGAGAATTTATCTTGGAAAGCGGAAGAATACTGAAACTCCGCGAAACCGTCACAAGGGTTTATGT  
ACAAAGAACGGGCAACCCCTTATGGGTTGTATCAGAA---

GACATGGAAGGGATGTTTTTATGTCAGCAATCGAAGCCCAAGCTCATGGAATTGTTGATCTTGTAGCGGTCGAAAATAG







TTGATTTACCAGAAGCAGAGGAGGAATTAGTAGCAGGTTATCAAACCGAATATTCAGGTATCAAATTTGGTTTATTTTAC  
GTTGCTTCTTATCTAAATCTACTAGTTTCTTCATTATTTGTAACGGTTCTTTACTTGGGTGGGTGGAATCTTCTCT---  
ATTCCGTACATATTCATTCTGAACCTTTTCGGA-----

ATAAATAAGACGGACGGAGTCTTTGGAACGACAATTGATATCCTTATTACATTAGCTAAATCCTATTTGTTCTGTTTCGT  
TCCTATCATAACAAGATGGACTTTACCTAGGATGAGAATGGACCAACTATTAATCCTTGGATGGAAATTTCTTTTACCTA  
TTTCTCTAGGTAATCTATTATTAATAACTTCTTTCCAACCTCGTTTTCGTTGTAA-----

ATGATCTGGCATGTACAGAATGAAAACCTTCATTCTCGATTCTACGAGAATTTTTATGAAAGCGTTTCATTTGCTTCTCTT  
CCATGGAAGTTTCATTTTCCCAGAATGTATCCTCATTCTTTGGCCTAATCTTCTTCTGATGATCGATTCAACCTCT----  
--

GATCAAAAAGATATACCTTGGTTATATTTTCATCTCTTCAACAAGTTTTAGTAATGAGCATAACGGCCCTATTGTTCCGATG  
GAGAGAAGAACCTATGATTAGCTTTTTCGGGAAATTTCCAACGAACAATTTCAACGAAATCTTTCAATTTCTTATTTTAC  
TATGTTCAACTCTATGTATTCCTCTATCCGTAGAGTACATTGAATGTACAGAAATGGCTATAACAGAGTTTTCTGTTATTC  
GTATTAACAGCTACTCTAGGAGGAATGTTTTTATGTGGTGCTAACGATTTAATAACTATCTTTGTAGCTCCAGAATCTTT  
CAGTTTATGCTCCTACCTATTATCTGGATATACCAAGAGAGATGTACGGTCTAATGAGGCTACTACGAAATATTTACTCA  
TGGGTGGGGCAAGCTCTTCTATTCTGGTTCATGGTTTTCTTGGCTATATGGTTCATCCGGGGGAGAGATCGAGCTTCAA  
GAAATAGTGAATGGTCTTATCAATACACAAATGTATAACTCCCCAGGAATTTCCATTGCGCTTATATCCATCACTGTAGG  
AATTGGGTTCAAGCTTTCCCCAGCCCTTCTCATCAATGGACTCCTGACGTATACGAAGGATCTCCCACTCCAGTCGTTG  
CTTTTCTTTCTGTTACTTTCGAAAGTAGCTGCTTCAGCTTCAGCCACTCGAATTTTCGATATTCCTTTTTATTTCTCATCA  
AACGAATGGCATCTTCTTCTGGAATCCTAGCTATTCTTAGCATGATATTGGGGAAT

Ceratophyllum

TTGTTGGTCTCATGGTATATCTCAGTATAGAGGATGATACCAAGGATCTGTATTTATTTATAAACTCTCCCAGGCGGATGG  
GTAATACCAGGGATAGCTCTTTATGATACTATGCAA---

TTTGTACCACCAGATGTACATACAATATGTATGGGATTAGCCGCTTCAATGGGATCTTTTCGTTCTGGTTCGGAGGAGAAAT  
TACCAACGTCTAGCATTCCCCACGCC---AGGGTTATGATTCACCAACCTGCCAGTTCTTTT---

TATGAGGCACAAGCAGGAGAATTTATCTTGGAAAGCAGAAGAACTATTGAAACTCCGCGAAACCCTCACAAGGGTTTATGT  
ACAAAGAACGGGAAACCCTTTATGGGTTGTATCGGAA---

GACATGGAAAGAGATGTTTTTATGTTCAGCAACAGAAGCCCAAGCTCATGGCATTGTTGATCTTGTAGCGGTTCGAAAATAG  
CGGGAATTTTCGCG-----ATG---AAAGAA-----CAAAAA-----

-----TTGATTCAT---GAAGTTTTAATTACTGAATCA---CTTCCAAATGGT-----

ATGTTCCGGGTTTCGTTTATGATAATGAAAAGATGATTCTAGGTTATGTTTTCGGGTAGG-----

ATTCGACGTAGTTTTATAAGGATACTACCAGGG-----

GATAGAGTCAAATCGAAGTAAGTCGTTATGATTCAACCAGAGGACGTATAATTTATAGACTTCGA-----  
-----AACAAAGATTCAAACGATTAA-----

-----ATGGAA-----GAATCGCATGGA-----TCTTTAGAA-----

ATAGATGGATCTACTCAACAAGACCTT-----

TTATATCCGCTTTTTTTTTTTCAGGAGTATATCTACGCATTTGTTTCATGATCATGGTTTTAAATGTAAATGGA-----  
-TCT-----ATTATTTACGAACCTATGGAAAAT---TTAGGTTAT-----

GATAAAAAATCCAGTTCACTAAGTGTAAAACGTTTTAATTTCTCGAATGCATCAA-----

CAGAATCATTTTCTTTTTTTCGGTTAATGAT-----TCGAAACAAAATCGATTTCGTGGTACACAAG-----AATCGT--  
-----TCGGATTTTCAAATGATATCACAGGGTTTTACAGTCATTCTAGAAATCCCATTCTCACTACAAAAA---

GTGAATATCCTA-----GAAGAA-----AAAAAATAGAAAAATTTTCAC-----AATTTACGA--  
-----

TCCATTATGCAATATTTCTTTTTTATAGAGGACAAAATATCACATTTAATTTATGTGTTCGGATATATTAATACCTTACCC  
CGTCCACCTTGAATCTTTGGTTCAAACACTTTACTGTTGCATACAGGATGCTCCTTCTTTGCATTTTTTGTAGATTTTTTC  
TCCAGGAGTATCGTAATTTGGAATAGTTTC---ATTACT-----CCAAAGAGGGCCAGTTCTTTT---TTTTCA---  
-----AAAGAGAAT---

CAAAGATTGTTCTTGTTCCTATATAATTCTCATGTATATATATGTGAATCTATATTTGTTTTTCTTCATAAACAGTGTTCT  
TCATCATTTCCGATCAACCTCCTTTGGAGCCTTTCTTGGAGAACACTTTTCTATGGAAAAATAGAGCAT-----  
-----CTTGTAGTCGTAGTAGTG-----CTG---CGT---AATGATTTTCAGAAGAGC-----

CTAGGGTTTTTACAAGGATCCTTTTCATGCATTATGTTAGATATCAAGGAAAATCCATTCTGGCTGCAAAGGGGACTCATT  
TCTGATGAAGAAATGGAAAACGCACCTTATGCATTTCTGGCAATGTAATTTTCACTTGTGGGCTCAACCAGACAGGATTC  
GTATAAACCAATTT-----TCTAAACATTCTTAGATTTGATGGGCTATCTT-----

TCACGTCTACGATTAATCGTTTTGGTGGTAAGAAATCAAATGCTAGAGCATTTTTTTATAATCGATATCCCTATTAATAA  
ATTCGATAGCATAGTTCCCATTTCTCCGCTGATTGGATCATTGGCTAAAGCGAAATTTTGTAAACGTATCGGGACATCCCA  
TTAGTAAACCGATCCGGGCAGATTCATCAGATTCTGATATTCTAGATCGATTTGGACGGATATGCAGAAATCTTTCTCAT

TATCACAGTGGG---  
TCTTCGAAAAAGAAGAGTTTGTATCGAGTAAAGTATATACTTAGACTTTTCGTGTGCAAGGACTTTGGCTCGTAAACATAA  
AAGTACAGTC---CGTGCTTTTTTG-----AAAAGATTGGGTTCCGGAA---TTTTTGGGAAGAATTTCTTACGGAG-  
-----GAAGAACAAGTTCTTTCTTTGATTTTGTCA-----AAAACC---TATTTGGCTTCGCATAGG-----  
TCACAT-----AAAGAACGCATTTGGTATTTAGATATTATCCGTATCAAT-----  
GACCTGGTCAATTTTGAATTTAAAGACTGA-----  
-----ATGATAATTGAT-----GCGACGGAAGTA---CAA---GCT-  
-----ATCAATTCTTTTTCCAGGTCGGAATCCCTA-----  
AAAGAGGTCTATGGACTCATATGGATGCTTGTTCCTATTTTTACTCCTGTATCGGGAATTACACTGGGGGTACTAGTGAT  
TGTGTGGTTAGAAAAGACAAATATCGGCAGGGATACAACAACGATTTGGGCTGAATATGCGGGGCCCTTGGGGATTCTTC  
AAGCTCTAGCAGACGGAATCAAACACTTTTTCAAAGAGGACTTTATCCCCTCTAGAGGGGATATTCTGTTTATTTCAGTCTT  
GGACCAGCTATAGCTGTATATCCATTTTACTAAGTTATTCAATAATTCCTTTTGGATTATCATTTTGTTCTAGCCGATCT  
CAATATCGGTGTTTTTCTATGGATTGCTATTTCAAGCGTTGCTCCTATTGGACTTCTTATGTCAGGATATGGATCGAATA  
ATAAATATTCTTTTTAGGTGGTCTACGAGCGGCTGCTCAATCAATTAGTTATGAAATACCATTAACTCTA---  
TGTGTGTTATCAATATCTCTACTATCTAATAGTTCAAGTACAGTTGATATAGTTGAGGCACAGTCAAAAATATGGTTTTTG  
GGGGTGGAACTCTGTGGCGTCAACCTATAGTTTTCTCGTCTTTTTAATTTCTTCCCTAGCAGAATGTGAAAGATTACCCT  
TTGATTTACCCGAAGCAGAGGAAGAATTAGTAGCCGTTATCAAACCTGAATATTGAGGATCAAACTCTGGTTTTATTTTAC  
GTTGCTTCTTACCTAAATTTATTAGTTTCTTCAATTTTGTAAACAGTTCTTTACCTTGGCGGTTGGAATTTATCT---  
ATTCCATATCTATTCTTTCTGAACTTTTTGGA-----  
ATCCATAAAATGGGGGAACTTTTGGGAACGACAATCGGTATTCTTATTACATTTGGTAAAGCTTATTTGTTCTGTTTCGT  
TTCTATCGCAACAAGATGGACTTTACCTAGAATGAGAATGGACCAATTATTAATCTTGGATGGAATTTCTTTTACCCA  
TTTCTCTAGGTAATCTATTATTGACAACCTTCTTCCAACCTCGTTTCACTGTAA-----

ATGATCTGGCATGTACAGAATGAAAACCTTCATTCTCGATTCTACGAGAATTTTTATGAAAGCGTTTCATTTGCTTCTCTT  
CCATGGGAGTTTCATTTTACCAGAATGTATCCTAATTTTTGGCCTAATTCTTCTTCTGATGATCGATTCAACCTCT----

GATCAAAAAGATATACCTTGGTTATATTTTCTCTTCAACAAGTTTAGTAATGAGCATAACGGCCCTATTGTTCCGATG  
GAAAGAAGAACCTATGATTAGCTTTTCGGGAAATTTCCAACGAACAATTTCAACGAAATCTTTCAATTTCTTATTTTAC  
TATGTTCAACTCTATGTATTCTCTATCCGTAGAGTACATTGAATGTACAGAAATGGCTATAACAGAGTTTTCTGTTATTC  
GTATTAACAGCTACTCTAGGAGGAATGTTTTTATGTGGTGTCAACGATTCAATAACTATCTTTGTAGCTCCAGAATGTTT  
CAGTTTATGCTCCTACCTATTATCTGGATATACCAAGAGAGATGTACGGTCTAATGAGGCTACTACGAAATATTTACTCA  
TGGGTGGGGCAAGCTCTTCTATTCTGGTTTCTGTTTCTCTTGGCTATATGGTTCATCCGGGGGGGAGATTGAGCTTCAA  
GAAATAGTGAATGGTCTTATCAATACACAAATGTATAACTCCCCAGGAATTTCAATTGCGCTTATATTCATCACTGTAGG  
AATTGGGTTCAAGCTTTCCCGAGCCCTTTTCTCAATGGACTCCTGACGTATACGAAGGATCTCCCACTCCAGTCGTTG  
CTTTTCTTTCTGTTACTTTCGAAAGTAGCTGCTTCAGCTTCAGCCACGCGAATTTTCGATATTCCTTTTTTATTTCTCATCA  
AACGAATGGCATCTTCTTCTGGAAATCCTAGCTATTCTTAGCATGATATTGGGGAAT

Chloranthus

TTGTTGGTCTCATGGTATATCTCAGTATAGAGGATGATACTAGGGATTTGTATTTGTTTATAAACTCTCCCGGTGGATGG  
GTAATACCAGGACTAACTATTTATGATACTATGCAA---  
TTTGTGCCACCAGATGTACATACAATATGCATGGGATTAGCCGCTTCAATGGGATCTTTTCATCCTGGTTGGAGGAGAAAT  
TACCAAACGTCTAGCATTCCCGCACGCT---AGGATTATGATCCACCAACCTGCTAGTTCTTTT---  
TATGAGGCACAAGCAGGAGAATTTATCCTGGAAGCGGAAGAATACTGAAACTCCGCGAAACCCTCACAAGGGTTTATGT  
ACAAAGAACGGGCAACCCTTTATGGATTGTATCCGAA---  
GACATGGAAAGGGATGTTTTTATGTCAGCAACAGAAGCCCAAGCTCATGGCATTGTTGATCTTGTAGCGGTTCGAAAATAC  
CGGGGATTTTCGCA-----

-----ATGGAA-----GAATTACAAAGA-----TATTTAGAA-----  
ATTGATAGATCTCGTCAACAACACTTC-----  
CTATATCCGCTTCTCTTTTCCAGGAGTATATCTACGTAATTTGCTCATGATCATGGTTTA-----AATGGA-----  
-TCG-----ATTCTTTACGAATCCATGGAAAAT---TTAGGTTAT-----  
GACAATAAATCCAGTTCACTAATTATCAAACGTTTAAATTATTTCGAATGCATCAA-----  
CAGAATCATTTGATGATTTTCGGTTAATCAT-----TCGAACCAAAAATCGATTCTTTGGGTACAAC-----AAGAAT--  
-----TTTGATTATCAAATGATATCAGAGGGTTTTGCAGTCATTGTGGAATTTCCATTCTCTGCAATTA-----





CAGTTTATGCTCCTACCTATTATCTGGATATACCAAGAAAGACGTACGGTCTAATGAGGCTACTATGAAATATTTACTCA  
TGGGTGGGGCAAGCTCTTCTATTCTGGTTCATGGTTTCTCTTGGCTATATGGTTCATCCGGGGGCGAGATCGAGCTTCAA  
GAAATAGTGAATGGTCTTATCAATACACAAATGTATAACTCCCCGGAATTTCAATTGCGCTTATATTCATCACTGTAGG  
AATTGGGTTCAAGCTTCCCTAGCCCCTTCTCATCAATGGACTCCTGACGTATACGAAGGATCTCCCACTCCAGTCGTTG  
CTTTTCTTTCTGTTACTTCGAAAGTAGCTGCTTCAGCTTCAGCCACTCGAATTTTCGATATTCCTTTTTATTTCTCATCA  
AACGAATGGCATCTTCTTCTGGAAATCCTAGCTATTCTTAGCATGATATTGGGGAAAT

Coffea

TTATTGGTCTTATGATATATCTCAGTATCGAAGATGATACCAAAGATCTGTATTTGTTTATAAACTCTCCCGGCGGATGG  
GTAATCCCCGGAGTAGCTATTTATGATACTATGCAA---

TTTGTACGACCAGATGTCCATAACAATATGCATGGGGTTAGCCGCTTCAATGGGATCTTTTATCCTGGTTGGGGGAGAAAT  
TACCAAACGCTAGCATCCCTCACGCT---AGGGTAATGATCCATCAACCTGCTAGTTCGTTT---

TATGAGGCACAAGCGGGAGAAATTTATCCTGGAAGCGGAAGAAGTCTGAAACTGCGTGAAACCCTCACAAGGGTTTATGT  
ACAAAGAACGGGCAAACCTTTATGGGTTGTATCCGAA---

GACATGGAAAGAGATGTTTTTATGTCAGCAACAGAAGCACAAGCTTATGGAATTGTTGATCTTGTAGCGGTTGAA-----  
-----ATG---AAAGAA-----CAAAA-----

-----TGGACTCAT---GAAGGTTTAATTACCGAATCG---CTTCCCAATGGC-----  
ATGTTCCGGGTTTCGTTTATGATAATGAAGATCTGATTCTAGGTTATGTTTCAGGAAAG-----

ATCCGACGCAGTTTTATCCGGATACTACCAGGA-----  
GATAGAGTCAAAATTGAAGTAAGTCGTTATGATTCAACCAGAGGACGCATAATTTATCGACTCCGC-----

-----ACAAGGATTCAAAGGATTAA-----  
-----ATGGAG-----GAAATTC AAGGA-----TATTTACAG-----

CTTGATAGATCTCAACAACACGGCTTT-----  
CTATATCCACTTATCTTTCAGGAGTATATTTATGCACTTGCTCATGATCATAGTTTA-----AACCGA-----

-TCG-----ATTTTG-----TTAGAAAAT---CCAGTTTAT-----  
GATAATAAATCCAGTTTCTAATTGTGAAACGTTTAATTACTCGAATTTATCAA-----

CAAAATCATTATTTATTTTGGTCAATAAT-----TCTAATCAAAATCTATTTTTTGGTCACAAC-----AAGAAT--  
-----TTATATTCTCAAACAATATCAGAAGGACTTGCATTTATTGTGGAAATTCATTTTATATACGATTA---

ATATCTTCTCAA-----GGGGG-----AAAGGGATATTAATAATTTTCGT-----AATTTACGA--  
-----

TCAATTCATTACCATTTTCTTTCTTAGAGAACAATTTTTACATTTAAATTTCTGTGTTAGATATACTAATACCCCATCC  
CGTACATCTGGAAATCTTGGTTCAAACCTTCGTTATTGGGTAAAAGACGCCTCCTCCTTGCATTTATTACGATTCTTTT

TCCACGAATATTGGAATTGGAATACTCTT---ATTGAT-----AGAAAGAAACCCAGTTTTGAT---  
TTTTACCA-----AAAAGAAAT---

CAAAAATTATTCTTCTTGTATATAATTCTCATGTATGTGAATACGAATCCATTTTCTTCTTCTCCGTAAGCAATCTTC  
T---CATTTGCGATCAACATCTTTTGGAGTCTTTCTTGAACGGATATATTTCTATGAAAAAAGAACGT-----

-----CTTGTAGAA-----GTC-----TTT---GCT---AAGGATTTTCAAGCCAGT-----  
CTATGGTTGTTCAAAGATCCTTTTATACATTATGTTAGGTATCAAGGAAAATCCATTTCTGGTTTCAAATGGGACGCCTCT

TTTGTATGAATAAATGGAAATCTTACCTTGTAAATTTTGGCAATGTCAATTTTGGTATTTGGTTTACCCGGGAAGGGTCT  
ATATAAACCAATTA-----CCCAATTATTCCTTTAACTTTATGGGCTATCTT-----

TCAAGTGTGCGACTAAACCATTCAATGGTACGAAGTCAAATGCTAGAAAATGCATTTCTAATCAATAATGCTATTAAGAA  
ATTTGATACCCTTGTTCACCTTATTCCTTATTGGATCATTGGCTAAAGCGAAATTTTGTAACTTATTAGGACATCCTA

TTAGTAAGCCGATTTGGACTGATTTGGCAGATTCTGATATTATTGACCGATTTTGGCATATATGCAGAAACCTTTCTCAT  
TATTATAGCGGA---

TCTTCAAAAAAAGAGTGTGATCGAATAAAAATATACTTCGACTTTCTTGTGCTAAAACCTTTGGCTCGGAAACACAA  
AAGTACTGTG---CGTGCTTTTTTG-----AAAGGATTAGGCTCGGAA---TTTTTGGAAAAATTCCTCACGTG-

-----GAAGAAGAAGCTCTTTCTTTGACCTTCTCA-----AGAACT---TCTTCTACTTTTCGGGG-----  
GTATAT-----AGAAATCGAATTTGGTATTTGGATATTATTTATATCAAT-----GATCTGACCAATTATCAA-----

-----ATGATAATTGAT-----ACAACCGAACTA---CAG---GCT-----  
ATTAATTCTTTTTTCAAATTGGAATCCCTA-----

AAAGAAGTCTATGGGATCATATGGATACTTATCCCCATTTTTACTCTTGTATTAGGAATCACAATAGGTGTACTCGTGAT  
TGTTTGGTTAGAAAGAGAAATATCTGCAGGGATAACAACGTATTGGACCTGAATATGCCGGCCCTTTAGGAATTCTTC

AAGCTCTAGCGGATGGTACAAAACCTTTTCAAAGAGAACCTTCTTCCATCTAGGGGCGATGCTCGTTTATTTCAGTATT  
GGACCATCCATCGCAGTCATATCAATTTTACTAAGTTATTTCAGTAATTCCTTTTGGTTATCGACTTGTCTAGCCGATCT

TACTATTGGTGTTTTTTATGGATCGCCATTTCAAGTATTGCTCCCATTTGGACTTCTTATGTCGGGATATGGATCAAATA  
ATAAATATTCTTTTTTGGTGGTCTAAGGGCTGCTGCTCAATCAATTAGTTATGAAATACCATTAACTCTA---

TGTGTATTATCAATATCTCTATTATCTAACAGTTCAAGTACAGTTGATATAGTTGAAGCGCAGTCAAAAATATGGTTTTTG  
GGGATGGAATTTATGGCGTCAACCTATAGGATTTATCATTCTTTCTTTAGCCGAGTGTGAGAGATTGCCTT  
TTGATTTACCAGAAGCCGAAGAAGAATTAGTAGCGGGTTACCAAATGAATATTCAGGTATCAAATTTGGTTTTATTTAC  
GTTGCTTCGTATCTAAATCTACTGGTTTCTTCATTATTTGTAACAGTTCTTTACTTGGGAGGCTGGAATCTTTCT---  
ATTCCGTACATATTCGTTTCTGAGATATTTGAC-----  
ATAAATAAAGCGGGTAAAGTTTTTGGCCCAGTAATGGTATCTTTATTACATTAGCTAAAACCTTATTTGTTCTTGTTTCAT  
TCCTATTGCAACAAGATGGACTTTACCAAGGCTGAGAATGGATCAACTATTAATCTTGGGTGGAAATTTCTTTTACCTA  
TTTCTCTAGGTAATCTATTATTAACAACCTTCGTCCCACTTCTTTTCATTGTAA-----

ATGATCTGGCATGTACAGAATGAAAACCTTCATTCTCGATTCTACGAGAATTTTTATGAAAGCCTTTCATTTGCTTCTCTT  
CGATGGAAGTTTGATTTTCCCAGAATGTATCCTAATTTTTGGCCTAATTTCTTCTTCTGATGATCGATTTCATCCTCG----  
--

GATCAAAAAGATATACCTTGGTTATATTTTCATCCCTTCAACAAGTTTTAGTAATGAGCATAACGGCCCTATTGTTCCGATG  
GAGAGAAGAACCTATGATTAGCTTTTCGGGAAATTTCCAAACGAACAATTTCAACGAAATCTTTCAATTTCTTATTTTAC  
TATGTTCAACTCTATGTATTCCTCTATCCGTAGAGTACATTGAATGTACAGAAATGGCTATAACAGAGTTTTCTTATTTC  
GTATTAACAGCTACTCTAGGAGGAATGTTTTTATGCGGTGCTAACGATTTTCATAACTATCTTTGTAGCTCCAGAATGTTT  
CAGTTTATGCTCCTACCTATTATCTGGATATACCAAGAAAGATGTACGGTCTAATGAGGCTACTATGAAATATTTACTCA  
TGGGTGGGGCAAGCTCTTCTATTCTGGTTTCATGGTTTCTCTTGGCTATATGGTTCATCTGGGGGAGAGATCGAGCTTCAA  
GAAATAGTGAATGGTCTTATCAATACACAAATGTATAACTCCCCAGGAATTTCAATTGCGCTCATATTCATCACTGTAGG  
AATTGGGTTCAAGCTTTCCCCAGCCCTTCTCATCAATGGACTCCTGACGTATACGAAGGATCTCCCACTCCCGTCGTTG  
CTTTTCTTTCTGTTACTTCGAAAGTAGCTGCTTCAGCTTCAGCCACTCGAATTTTCGATATTCCTTTTTATTTCTCATCA  
AACGGATGGCATCTTCTTCTGAAATCCTAGCTATTCTTAGCATGATATTGGGAAAT

Cucumis

TTATTGGTCTTATGGTATATCTCAGTATAGAGAATGATAACAAGGATCTGTATTTGTTTTATAAACTCTCCTGGCGGATGG  
GTAATCCCCGGGGTAGCTATTTATGATACTATGCAA---  
TTTGTGAACCCGATGTGCATACAATATGCATGGGATTAGCCGCTTCAATGGGATCTTTTGTCTGGTCCGGCGGAGAGAT  
TACCAAACGTCTAGCATTCCCTCACGCT---AGGGTAATGATACATCAACCTGCGAGTTCTTTT---  
TATGAGGCACAAACGGGAGAATTTATCCTGGAAGCAGAAGAAGTCTGAAACTGCGCGAAACCATCACAAGAGTTTATGT  
ACAAAGAACGGGCAAACCCCTATGGGTTGTATCCGAA---  
GATATGGAAGGGATGTTTTTATGTGAGCAACAGAAGCCCAAGCTCATGGAATTGTTGATCTTGTAGCGATTGAA-----  
-----  
-----  
-----  
-----  
-----  
-----  
-----  
-----  
-----  
-----

-----ATGGAG-----GAATTTCAAGGA-----TATTTAGAA-----  
CTTGAGAAATCTCGGCAACGTGACTTC-----  
CTATACCCACTTATCTTTTCGGGAGTATATTTACGCATTTTCTCATGATCATTHTTTA-----AATGGA-----  
-TCC-----ATTTTG-----TTGGAAAAT---TCTGGTTAT-----  
GACAAAAATCCAGTTTACTAATGGTAAAACATTTAATTACTCGAATGTATCAC-----  
CAGAATCATTHTTTTTTTTTTACTAATTAT-----TATAACAAAAACCCTTTTTGGGGGTACAAC-----AACAAAT--  
-----TTGTATTCTCAAATGTTATCAGAAGGGTTGCGATCATTGCGGAAATTCACHTTCCCTACGATTA---  
GTATCTTCTTA-----GAAGAA-----GAAGAAATCGCAAAATCTTAT-----AATTTACGA--  
-----

TCAAGTCATTCAATATTTCTTTTTTGGAGGATAAAATCCCACATTTAAATTATGTGTGAGATGTATTAATACCCTATCC  
GCTCCATCTGGAAATTTTGGTTCAAATCCTTCGCTCCTGGGTGAAAGATGCCTCTTCTTTTCAHTTATTACGGTTCTTTT  
TTCACGAGTATTGTAATTTGAATAGTCTT---AGTACT-----TCAAAAAAATTGATTTCTTTT---TTTTCA---  
-----AAAAGAAAT---  
CGAAGATTAGTCTTGGTGTATACAATCTTATGTATGTGGATACGAATCCATTTTCTTTTTTCTACGTAACCAATCTTC  
T---CATATACGATTAACHTTCTTATAAGGGCCTTTTTGAGCGAATATATTTCTATGGAAAAATCGAACAT-----  
-----CTTGTCAA-----GTG-----TTT---GCT---AATTATTTTTCGGCTATC-----  
TTACGGGTCTTCAAGGATCCTTTAATACATTATGTTAGATATCAAGCAAAATCTATTTCTGGTTTCAAAGGATACGCCACT  
TCTGATTAATAAGTGGAAATATTACCTTGTCAATTTATGGCAATGTCATTTTTATGTGTGGTCCACAACCAGAAAGGATCT  
ATATAACCAATTA-----TCCAAGCGTTCTCTTGGACTTTTTGGGCTATATT-----  
TCAAGTGTGCGATTAATCCTTCAGTGGTATGGACTCAGATGTTAGAAAATTCATTTCTAATAGATAATGCTACGCAGAA  
ACTCGATACACTAGTTTCTATTACTCTGCTTGCATCATTGGCTAAAGCGAAATTTGTAACGTCTTAGACATCCC-

ATTAGTAAGCCGACCTGGATCGATTTCGTCGGATTTTGGATATTATTGATCGATTTTTGCGTATATCCAGAAATCTTTCTCA  
TTATTACAGAGGA---  
TCCTCAAAAAAAAAAGAATTTGTATCGAATACAATATATACTTCGCCTTTCTTGTGTTAAACTTTGGCTCGTAAACACAA  
AAGTACTGTA--CCGTGCTCTTTTT-----AAAAGTTAAATTCGGA----TTATTGGAAGAATTCTTTACGGAG-  
-----CAAGAACAGGTTCTTTCTTTGATCTTCCCA-----AGAACT---TCTTTTACTTTACGGAGG-----  
GTATAT-----AGGGGGAAAATTTGGTATTTGGATATTATTTGCATGAAT-----  
GATTTGGCCAATCATGAACGATTGGTTATGAAACCATGTATA-----  
-----ATGATAATTGAT-----ACATCACAGTCC---CA----GAT-  
-----ATCCATTCTTTT---CGAGATGGATTCT-----AAAGAT-TCTAT--GAATCTATGG-TACT-  
GTCCCTATGTGGACTACTGTATT-  
GGAATCACCATAAGGCTACTAGTAATTGTATGGTTAGAAAGAGAAATATCCGCAGGAATACAACAACGGATTGGACCTGA  
ATATGCTGGTCCTTTGGGAGTTCTTCAAGCTTTAGCAGATGGTACAAAACACTACTTTTTAAAGAAAATTTGCTTCCATCTA  
GAGGTGATACTCGTTTATTTCAGTATCGGACCATCCATAGCAGTCATATCAATTTTACTAAGCTATTTCAGTAATTCCTTTT  
GGTTATCGCCTTGTTTTAGCCGATCTCCCTATCGGTGTTTTTTTTATGGATTGCCATTTCAAGTGTTGCTCCCATCGGACT  
TCTTATGTCAGGATATGGATCCAATAATAAATATTCCTTCTTAGGTGGTCTACGAGCTGCTGCTCAATCAATTAGTTATG  
AAATACCATTAACTCTA---  
TGTGTATTATCAATATCTCTACTATCTAACAGTTCGAGTACCGTTGATATAGTTGAGGCTCAATCAAAATATGGTTTTTG  
GGGTTGGAATTTGTGGCGTCAACCTATAGGGTTTGTATTTTTTCTAATTTCTTCTTAGCAGAATGCGAGAGATTACCTT  
TTGATTTACCAGAAGCAGAAGAAGAATTAGTAGCGGGTTATCAAACACTGAGTATTCGGGTATAAAATTTGGTTTTATTTTAT  
GTTGCTTCTCTATAAATCTATTAGTTTCTTCGTTATTTGTAACCTGTTCTTTACTTGGGTGGTTGGGATATCTCT---  
ATTCCATACATATTAGGTTATGAACTTTTTGAA-----  
ATAAATAAAGTGTATGAAGTCTTTGGAATGACAATTAGTATCTTTATTACATTAGCGAAAACCTTATTTGTTCTTGTTTCAT  
TTCTATAGCAACAAGATGGACTTTACCCCGACTAAGAATAGATCAACTATTAATCTCGGATGGAAATTTCTTTTACCTA  
TATCTCTCGGTAATCTATTATTAACAACCTCTTTTCAACTTTTTTCACTGTAA-----  
-----  
ATGATCTGGCATGTACAGAATGAAAACCTTCATTCTCGATTCTACGAGAATTTTTATGAAAGCCTTTCATTTGCTTCTCTT  
CGATGGAAGTTTTATTTTCCCAGAATGTATCCTAATTTTTGGCCTAATTTCTTCTTCTGATGATCGATTCAACCTCT----  
--  
GATCAAAAAGATATACCTTGGTTATATTTTCATCTCTTCAACAAGTTTTAGTAATGAGCATAACGGCCCTATTGTTCCGATG  
GAGAGAAGAACCTATGATTAGCTTTTCGGGAAATTTCCAACGAACAATTTCAACGAAATCTTTCAATTTCTTATTTTAC  
TATGTTCAACTCTATGTATTCTCTATCCGTAGAGTACATTGAATGTACAGAAATGGCTATAACAGAGTTTTCTATTATTC  
GTATTAACAGCTACTCTAGGAGGAATGTTTTTATGCGGTGCTAATGATTTAATAACTATCTTTGTAGCTCCAGAATGTTT  
CAGTTTATGCTCCTACCTATTATCTGGATATACCAAGAAAGATGTACGGTCTAATGAGGCTACTACGAAATATTTACTCA  
TGGGTGGGGCAAGTTCTTCTATTCTGGTTCATGGTTTTCTTGGCTATATGGTTCATCCGGGGGAGAGATCGAGCTTCAA  
GAAATAGTAAATGGTCTTCTCAATACACAAATGTATAACTCCCCAGGAATTTCAATTGCGCTTATATTCATCACTGTAGG  
AATTGGGTTCAAGCTTTCCCCAGCCCTTCTCATCAATGGACTCCTGACGTATACGAAGGATCTCCCACTCCAGTCGTTG  
CTTTTCTTTCTGTTACTTCGAAAGTAGCTGCTTCAGCTTCAGCCACTCGAATTTTCGATATTCCTTTTTATTTCTCATCA  
AACGAATGGCATCTTCTTCTGAAATCCTAGCTATTCTTAGCATGATATTGGGGAAT  
Daucus  
TTATTGGTCTTATGGTATATCTCAGTATCGAGAATGATACCAAAGATCTCTATTTGTTTATAAACTCTCCCGGCGGATGG  
GTTATCCCTGGAGTGGCTATTTATGATACAATGCAA---  
TTTGTGCGACCAGATGTACAGACAATATGCATGGGATTAGCCGCTTCAATGGGATCTTTTATCTTAGCCGGAGGAGAAAT  
TACCAAACGTCTAGCATTCCCTCACGCT---AGGGTAATGATTCATCAACCTGCTAGTTCTTTT---  
TATGAGGCACAAACGGGAGAATTTATCCTGGAAGCGGAAGAGCTGCTAAAACCTGCGTGAAACCCTAACAAGGGTTTATGT  
ACAAAGAACGGACAAACCCTTATGGGTTGTCTCGGAA---  
GACATGGAAGAGATGTTTTTATGTACAGCAACAGAAGCCCAAGCTTATGGAATTGTTGATCTTGTAGCGGTGGTTGAG--  
-----ATG---AAAGAA-----CAAAA-----  
-----TGGAATTCAT---GAAGTTTTAATTACTGAATCC---CTTCCCAACGGT-----  
ATGTTCCGTATTTCGTTAGATAATCAAGATATGATTCTAGGTTATGTTTTCAGGAAAG-----  
ATCCGACGTAGTTTTATACGGATACTACCAGGC-----  
GATAGAGTAAAAATTGAAGTAAGTCGTTATGATTCAACCAGAGGACGTATAATTTATCGACTTCGC-----  
-----ATAAGGATTTCGAAAGATTAG-----  
-----ATGGAG-----GAATTCCAAAGA-----TATTTAAAG-----  
CTAAATAGATCTCAACAACACTACTTC-----  
TTATATCCACTTATCTTTTCCAGGAGTATATTTATGCACTTTCGCATGATCATGGTTTTAAATAGAAATAGA-----  
-TCC-----ATTTTT-----TTGAAAAT---GTGGGTTAT-----

AATAAATTCAGTTTACTAATTGTGAAACGTGCAATTGAGCGAATGTATCAGTATGAGCAGAAGCATTGATTCTTTTTGA  
TAATGAT-----TTTAACCAAATAGATTTTTTTGGACGCAAC-----ATAAT-----  
TTTTCTTTTCAAATGATATCAGAAGGATTTGCAGTCATTGTAGAAATCCGTTTTATCTCCGATTA---  
TTATCTTCGCTA-----GAAAAG-----AAAGGAATAGTGAAATCTAAT-----AATTTACGA--  
-----  
TCAATTCATTCAATATTCCTTTTTTTAGAGGACAATTTTTTACATTTAATTTATGTATTAGAGATACTAATACCCTACCC  
AGCCCATCTGGAAATATTGATTCAAACCTCTGCGCTACTGGGTAAAAGACGCTTCTTCTTTACATTTATTACGATTCTTTC  
TCCATGAGTATCGTAGTTGGAAT-----ACG-----CCAAATAAAGCCAGTTCTTTT---TTTTCA---  
-----AAAAGAAAT---  
CAAAGGTTTTTCTTCGTCCTATATAATTCTCATATATGTGAATATGAATCCATCTTCGTCTTTCTTCGTAACCAATCTTC  
T---CATTTATGTTTCAACCTCTTCTGGAACCCTTCTTGAACGAATCTATTTCTATGGAAAACCTAGAACAT-----  
-----CTTGTACTT-----GTAGAAGCTTTT---GCT---AAGGCCTTTCAGGCCAAT-----  
CTATGGTTGTTTAAAGGATCCTTTTCATGCATTATGTTAGGTATCAAGGAAAATCAATTCTCGCTTCAAAGGGACACCCCC  
TTTGATGAAAAAATGGACATATTACTTTGTCAATTTATGGGAATGTCGTTTTTACCTATGGTCTCAGCCGGGACGGATCT  
GTATAACCAATTA-----TATAATAATTCCTATCTCTTCTGGGATATATA-----  
TCAAGTGCGGGACTAAACCCTTCAATGGTCCGCAGTCAAATGTTAGAAAATGCATTTATAATTGATAATCCTATTAAAAA  
GTTTCGATACTCTTGTTCCAATTGTTCTCTGATTGGATCATTGGCTAAGGCGAGATTTTGTAACTATTGGGGCACCTTA  
TTAGTAAGGCGGTTTGGACTGATTTATCAGATTCTGATATTATTGTCCGATTTGGGCGTATATGCAGAAATCTTTCTCAT  
TTTTTTAGTGGA---  
TCCTCACAAAAAAGAGTTTTGTATCGAATAAAGTATATACTTCCGGCTGTCTTGTGCTAGAACTTTGGCTCGTAAACATAA  
AAGTACTGTA---CGTGCTTTTTTG-----AAAAGATCGGGCTCGGGG---TTATTGGAAGAATTCTTTACGGCG-  
-----GAAGAGCAAGTCCTTTATTTGACCTTTCCA-----AGAGCT---TCTTCCACTTCGCATAGG-----  
TTATAT-----AGAAGGCGTATTTGGTATTTGGATATTATTTGTATCAAT-----  
GATTTGGCCAGTCATGAATTGAATGATTTCGTTAGTC-----  
-----ATGATAATAGAT-----ACAACAGAAGTA---CAA---GCT-  
-----ATCAATTCTTTTTTAGATTGGAATCCTTA-----  
AAAGAGGTATATGATATCATATGGATGCTTGTCCCTATTTTGACTCTTGTATTAGGAATCACAATAGGTGTACTAGTAAT  
TGTTTGGTTAGAGAGAGAAATATCTGCGGGGATACAACAACGTATTGGCCCCGAATATGCTGGACCTTTGGGAATCTTC  
AAGCTTTAGCAGATGGTACAAAATTACTTTTTCAAAGAGAATCTTCTTCCATCAAGAGGAGATACTCGTTTATTTCAGTATC  
GGACCATCCATAGCAGTCACATCAATTTCTACTAAGTTATTTAGTAATTCCTTTTGGATATCGCCTTGTTCAGCCGATGT  
CAGTATTGGTGTTTTTTATGGATTGCCATTTCAAGTATTGCTCCCGTGGGCTTCTTATGTCAGGTTATGGATCAAATA  
ATAAATATTCTTTTTTAGGTGGTTTTACGGGCTGCTGCTCAATCAATTAGTTATGAAATACCATTAACTCTA---  
TGTGTGTTATCAATATCTCTATTATCTAACAGTTCAAGTACAGTTGATATAGTTGAAGCGCAGTCAAATATGGTTTTTG  
GGGGTGGAAATTTGTGGCGTCAACCTATAGGGTTTTATAGTTTTTCTAATTTCTGCTCCTTAGCCGAGTGTGAAAGATTACCTT  
TTGATTTACCAGAAGCAGAAGAAGAATTGGTAGCAGGTTATCAAACCGAATATTTCAGGTATAAAATTTGGTTTTATTTTAC  
GTTGCTTCGTATCTGAATTTACTAGTTTCTTCAATTTTGTAAACGGTTCTTTACTTAGGGGGTTGGAATCTTTCT---  
CTTCCGCACATAGCCCTTCTTTTTTTTTTTGAA-----  
ATAAATAAAGCGGGTAGAGTCTTTGGAACAATAATTGGTATCTTTATTACATTGGCTAAAACCTTATTTGTTCTTATTTCAT  
TGCTATCACAACAAGATGGACTTTACCAAGGCTAAGAATGGACCAACTCTTAAATCTTGGGTGGAATTTCTTTTACCTA  
TATCTCTCGGCAATCTATTATTAACAACCTTCTTCCAACCTTCTTTCACTGTAA-----  
-----  
ATGATCTGGCATGTACAGAATGAAAACCTTCATTCTCGATTCTACGAGAATTTTTATGAAAGCCTTTCATTTGCTTCTCTT  
CGATGGAAGTTTGATTGTCCCAGAATGTATCCTAATTTTTGGCCTAATCTTCTTCTGATGATCGATTCAACCTCT----  
--  
GATCAAAAAGATATACCTTGGTTATATTTTCATCTCTTCAACAAGTTTAGTAATGAGCATAACGGCCCTCTTGTTCGGATG  
GAGAGAAGAACCCGTGATTAGTTTTTTCGGGAAATTTTTCAAACGAACAATTTCAACGAAATCTTTCAATTTCTTATTTTAC  
TATGTTCAACTCTATGTATTCCTCTATCCGTAGAGTACATTGAATGTACAGAAATGGCTATAACAGAGTTTCTCTTATTC  
GTATTAACAGCTACTCTAGGAGGAATGTTTTTATGCGGTGCTAACGATTTAATAACTATCTTTGTAGCTCCAGAATGTTT  
CAGTTTATGCTCCTACCTATTATCTGGATATACGAAGAAAGATGTACGGTCTAATGAGGCTACTATGAAATATTTACTCA  
TGGGTGGGGCAAGCTCTTCTATTCTGGTTCATGGTTTTCTTGGCTATATGGTTCATCCGGGGGAGAGATCGAGCTTCAA  
GAAATAGTGAATGGTCTTATCAATACACAAATGTATAACTCCCCAGGAATTTCAATTGCGCTCATATTCATCACTGTAGG  
AATTGGATTCAAGCTTTCCCCAGCCCTTCTCATCAATGGACTCCTGACGTATACGAAGGATCTCCCACTCCAGTCGTTG  
CTTTTCTTTCTGTTACTTTCGAAAGTAGCTGCTTCAGCTTCAGCCACTCGAATTTTCGATATTCCTTTTTTATTTCTCATCA  
AATGAATGGCATCTTCTTCTGGAAACCCTAGCTATTCTTAGCATGATATTGGGGAAT  
Dioscorea  
TTGTTGGTCTCATGGTATATCTCAGTATAGAAGATGCTACTAAGGATCTTTATTTGTTTATAAACTCTCCCGGCGGATGG  
GTAATCCCAGGAATGGCCATTTATGATACTATGCAA---



TTTGTGTCACCCGATGTGCATAACAATATGCATGGGATTAGCCGCTTCGATGGGATCCTTAATTCTAGTCGGAGGAGAAAT  
TACCAAACGCCTAGCATTCCCTCAGCT---AGGGTTATGATTCACCAACCTGCTAGTTCCTTT---  
TATGAGGCACAAGCAGGGGAATTTATCCTGGAAGCAGAAGAACTACTGAAACTTCGTGAAACACTCACAAAGGTTTATGT  
ACAAAGAACGGGCAATCCCTTATGGGCTGTCTCCGAA---  
GACATGGAAAGGGATGCTTTTTATGTCAGCAACAGAAGCCCAAGCTCATGGCATTGTTGATCTTGTAGCGGTCGAAAATGA  
AAATACGAACGATTTTCGTG-----

-----ATGAAAATAGAA-----GAATTACAAGGA-----TATTTAGAA-----  
AAAGATGGATCTAGGCAAAGGCACCTTCCTATTTCCACTTCTCTTTTCAGGAGTATATTTACACACTTGCTCATGA  
TCATGGTTTTA-----AATGGT-----TCG-----ATTTTT-----GTGGAAATT---TTGGATTAT-  
-----GACAATAAATCTAGTTCAGTACTTGTGAAACATTTAATTACTCGAATGTATCAA-----  
CAGAATTATTTGATTTATTCAGCTGATGAT-----TCGAACCAAAATCGAATCGTTGGGCACAAC-----AATTTT--  
-----TTTTATTCTAAAATGATATCAGAAGTTTTGCAGTCAGTATGGAAATTCATTTTTACTGCGATTA---  
GGATCTTCCCTC-----GAAGAA-----AAAGAAATACCTAAATCACAA-----AATTTGCGA---  
-----

TCTATTCATTCAATATTTCCCTTCTTAGAGGATAAATCATCACATTTAAATTATGTGTCAGATATATTAATACCCCATCC  
CATCCATCTGGAAATCTTGTTCAAATACTTCAATGCTGGACTCAAGATGTTTCTCTTTGCATTTATTGCGATTCTTTT  
TCCACGAATATCATAATTCGAATAGTTTC---ATTACT-----CCGAAAAACCTGTTTACGTG---  
ATTTCAATTTCA-----AAAGAAAAT---  
AAAAGATTTTTTCGATTCCTATATAATTCTTATGTATTTGAATGTGAATTTTTATTAGTTTTTTTTTCATAAACAATCCTC  
T---TATTTACGATCAAGGTCTTCTGGAGTCTTTCTTGAGCGAACACATTTCTATGAAAAAATGGGGAAT-----  
-----TTTTTAGTA-----GTG-----TGT---TGT---AATTATTTTCAGAAGACC-----  
CAATGGTTCTTCAAGGATCCTTTTCTGCATTATGTTTCGATATCAAGGAAAAGCAATTCGGTGTCAAAGGGAACATCATCT  
TTTGTATGAGGAAATGGAGATCTTACCTTGTGCATTTTTGGCAATATTTATTTTCAATTTTGGTCTCATCCCCATAGGATTC  
ATATAAACCAATTA-----TCAAATTATTCCTTCTGTTTTCTGGGTTATCTT-----  
TCAAATTTACTAATAAATCTTTCCGTGGTAAGGAGTCAAATGCTAGAAAATTCATTTGTAATAGATATTCTTACTAAGAA  
ATTTGATACCAGAGTTTTAGTTTATTGCTCTTATTCGATCATTGTCTAAAGCGAAATTTTGTACCGTATCCGGGCATCCCA  
TTAGTAAGTCAATATGGACAAATTTATCAGATTTGGATATTATTCATCGATTTGGTTGGATATGTAGAAATCTTTCTCAT  
TATCACAGTGGA---  
TCCTCAAAAAACAGAGTTTTGTATAGAATAAAGTATATACTTCCGATTTTCGTGTGCTAGAACTTTGGCTCGTAAACATAA  
AAGTAAGGTA---CGCGCTTTTTTG-----CAAAGATTAGGTTCCGGGA---TTATTACAAGAATTCTTTAGAGAA-  
-----GAAGAAGAAATCTTTCTTTGATCTTCCCT-----CAA-----GCTCTTTTTCGG-----  
TCACAT-----ACAGGACGCATTTGGTATTTGGATATTATCTGTATCAAT-----  
GACCTGCGGAATCTCATGATTGATCATAAAATAAAACCCTATAATGAATGCAAA-----



CAGTATAGGTGTTTTTTTTATGGATCGCCATTTCCAGTATTGCTCCTATTGGACTTCTTATGTCAGGATATGGATCGAATA  
ATAAATATTCCTTTTTAGGTGGTCTACGAGCTGCTGCTCAATCTATTAGTTATGAAATACCATTAACCTCCA---  
TGTGTGTTATCAATATCTCTACTATCTAACAGTTCAAGTACAATTGATATAGTTGAGGCACAGTCAAAATATGGCTTTTG  
GGGATGGAATCTGTGGCGTCAACCCATAGGGTTTATAGTTTTTATAATTTCTTCCCTAGCAGAATGTGAGAGATTACCTT  
TTGATTTACCAGAAGCAGAAGAAGAAATTAGTAGCGGGTTATCAAACCGAATATTCAGGTATCAAATTTGGTTTTATTTTAC  
GTTGCTTCTTACCTAAATCTACTAGTTTCTTCAATATTTGTAACAGTTCTTTACTTGGGCGGGTGAATCTCTCT---  
ATTCCGTACATATTCATTCTGAACTTTTCGGA-----  
ATAAATAAAACGGGGGAGTATTTGGAACAACGATTGGTATCCTTATTACATTAGCTAAAGCTTATTTGTTCTGTTCAT  
TCCTATCACAACAAGATGGACTTTACCTAGGATGAGAATGGACCAACTATTAATCTTGGATGGAAATTTCTTTTACCTA  
TTTCTCTGGGTAATCTATTATTGACAACCTTCTTCCCAACTCCTTTCACTGTAA-----

ATGATCTGGCATGTACAGAATGAAAACCTTCAATCTCGATTCTACGAGAATTTTTATGAAAGCGTTTCATTTGCTTCTCTT  
CCATGGAAGTTTCATTTTCCAGAATGTATCCTAATTTTTGGCCTAATCTTCTTCTGATGATCGATTCAACCTCT----  
--

GATCAAAAAGATATACCTTGGTTATATTTTCACTCTTCAACAAGTTTAGTAATGAGCATAACGGCCCTATTGTTCCGATG  
GAGAGAAGAACCTATGATTAGCTTTTCGGGAAATTTCCAAACGAACAATTTCAACGAAATCTTTCAATTTCTTATTTTAC  
TATGTTCAACTCTATGTATTCCTCTATCCGTAGAGTACATTGAATGCACAGAAATGGCTATAACAGAGTTTCTGTTATTC  
GTATTAACAGCTACTCTAGGAGGAATGTTTTTATGTGGTGTCAACGATTCAATAACTATCTTTGTAGCTCCAGAATGTTT  
CAGTTTATGCTCCTACCTATTATCTGGATATACCAAGAGAGATGTACGGTCTAATGAGGCTACTACGAAATATTTACTCA  
TGGGCGGGGCAAGCTCTTCTATTCTGGTTTCATGGTTTCTTCTGGCTATATGGTTTCATCCGGGGGAGAAATCGAGCTTCAA  
GAAATAGTGAATGGTCTTATCAATACACAAATGTATAACTCCCCAGGAATTTCAATTGCGCTTATATTCATCACTGTAGG  
AATTGGGTTCAAGCTTTCCCGAGCCCTTTTTCATCAATGGACTCCTGACGTATACGAAGGATCTCCCACTCCAGTCGTTG  
CTTTTCTTTCTGTTACTTTCGAAAGTAGCTGCTTTCAGCTCCAGCCACTCGAATTTTCGATATTCCTTTTTATTTCTCATCA  
AACGAATGGCATCTTCTTCTGGAATCCTAGCTATTCTTAGCATGATATTGGGGAAT

*Eucalyptus*

TTATTGGTCTTATGGTATATCTCAGTATAGAGAATGATAACAAGGATCTGTATTTGTTTATAAACTCTCCTGGCGGATGG  
GTAATCCCGGGGTAGCTATTTATGATACTATGCAA---  
TTTTGTGCAACCCGATGTGCATAACAATATGCATGGGATTAGCCGCTTCAATGGGATCTTTTGTCTGGTCCGGCGGAGAGAT  
TACCAAACGTCTAGCATTCCTCACGCT---AGGGTAATGATACATCAACCTGCGAGTTCTTTT---  
TATGAGGCACAAACGGGAGAATTTATCCTGGAAGCAGAAGAAGTCTGAAACTGCGCGAAACCATCACAAGAGTTTATGT  
ACAAAGAACGGGCAAACCCCTATGGGTTGTATCCGAA---  
GATATGGAAAGGGATGTTTTTATGTCAGCAACAGAAGCCCAAGCTCATGGAATTGTTGATCTTGTAGCGATTGAA-----

-----ATCACT---TCTC--CTTCTCAATGGTA--  
TGTATGCTCAGGGTT--TTTCGATAATGAAGATCTAATTTCTAGGTTATGTTTCATGAAGG-----  
ATCCGACGGAGTTTTACACGTATACTATGGGGG-----  
GAGAGGGGCAAAATTAAGTAAGTCGTTATGATTCAAGCAGAGGGCGTATAATTTATAGATGCCAC-----  
-----AACAAAGGATTGCAATGATTAA-----

-----ATGGAG-----GAATTTCAAGGA-----TATTTTCGAA-----  
CTAGATAGATCTAGACAACATGACTTC-----  
CTATACCCACTTCTTTTTTCGAGAGTATATTTATGCACTTGCTCATGATCATGGTTTA-----AAGAAA-----  
-TCG-----ATTTTG-----TTCGAAAAT---GCAGGTTAT-----  
GACAATAAATCTAGTTCAATAATTGTGAAACGTTTAATTACTCGAATGTATCAA-----  
CAGAATCCTTTGATTTTTTTCAGCTAATGAT-----TCTATCCAAAATCCATTTTTTGGGCAAAAC-----AAGAAT--  
-----TTTTATTCTCAAATATCTCCGAGGGATTTGCAGTCATTGTGGAATTTCCATTTTCCCTAAGATTA---  
GTATCTTCTTA-----GAAAGG-----AAAGAAATAGCAAAATCTCAT-----AAATTACGA--  
-----

GCAATTCATTCCATATTTTCTTTTTTATGAGGACAAATTTTACATTTAGATTATGTGTCGGATGTACTAATACCCTATCA  
CATCCATCTAGAAATCTTGGTTCAAACCTTTCGCTACTGGGTGAACGATGCCTCTTCTTTGCAATTTATTACGTTTCTTTT  
TCCACGAGTATTGGAAT-----AGTCTT---ATTACT-----CAAAGAACCATATTACCATT---TTTTCA---  
-----AAAGGTAAT---

CCAAGATTATTCTTGTTCCTATATAATTCTCATATATGTGAATACGAATACTTCTTTCTTTTTTCTCCGTAATCAATCTTC  
T---CATTTACGGTCAACATCTTCTGGAATCTTTTTTGGAGCGAATATATTTCTATGTAAAAATAGAACAT-----  
-----TTTGTCAA-----GTC-----TTC---TATGATAATGATTTTTCAGTGCATC-----  
CTATGGTTCTTCAAAGATCCTTTTCATGCATTATGTTTCGATATCAAGGAAAATCAATTTCTGGCTTCAAAGATACGCCTCT  
TCTGATGAAGAAATGGAATATTACCTTGTTAATTTATGGCAATATCATTTTTTACGCCTGGTTTCAACCAGGAAGGATCG

ATATAAACCAATTA-----TGCAAGTATTCTCTTTACTTTTTGGGCTATCGT-----  
TCAAGCGTGC GACTAAATCCTTCAGTGGTACGAAGTCAAATGCTAGAAAATTCATTTCTAATAAATAATGCTATGAAGAA  
GTTTCGAGACAATAGTTCCAATTATTCTCTGATTGGATCATTGTCTAAAGCGAATTTTTGTGACACATTAGGGCATCCCA  
TTAGTAAACCGACCCGGGCTGATTCATCAGATTCTGATATTATCGACCGTTTTTTGCGTATATCCAGAAATCTTTCTCAT  
TATCACAGCGGA---

-----ATGATAATTGAT-----ACAACAGAAGTA---CAA---GAT-----

CTAAATCTTTTTCTAGATTGGAATCTTTA-----  
AAAGAAGTCTATGGAATCATAGGGATGTTTTACCTATTTTGACTCTTGATTGGGAATCACAATAGGTGTACTCGTAAT  
TGTGTGGTTAGAAAGAGAAATATCCGCAGGAATACAACAACGTATTGGTCCCGAATACGCCGGTCTTTGGGAATTCTTC  
AAGCTTTAGCAGATGGGACAAAACCTATTTTCAAAGAGAATCTTTTTCCATCTCGAGGAGATACTCGTTTATTTCAGTATA  
GGACCATCCATAGCAGTTATATCCATTTTACTAAGTTATTTCAGTAATTCCTTTTAGTTATCACCTTGTTTTATCTGATCT  
CAATATCGGTGTTTTTTATGGATTGCCATTTCCAGTATTGCTCCCATTTGGACTTCTTATGTCAGGATATGGATCAAATA  
ATAAATATTCTTTTTAAGTGGTCTACGAGCCGCTGCTCAATCGATTAGTTATGAAATACCATTAACCTCTTTTGTGTGT  
ATCAATATCTCTTTA---  
TCTAACAGTTCAAGTACAGTTGATATAGTTGAGGCCAGTCCAAATATGGTTTTTGGGGATGGAATTTGTGGCGTCAACC  
TATAGGGTTTTTCATTTTTCTAATTTCTTCCCTAGCAGAATGTGAGAGATTACCTTTTCGATTTACCAGAAGCAGAGGAAG  
AATTAGTAGCAGGTTATCAAACCGAATATTCCGGTATCAAATTTGGGTTATTTTATGTTGCTTCTATCTAAATCTATTA  
GTTTCTTCGTTATTTGTAACAGTTCTTTACTTAGGGGGTTGGAATATCTCT---  
ATTCCTTACATATTGTTTCTGAGCTATTTGAA-----

ATGATCTGGCATGTACAGAATGAAAACCTCATTCTCGATTCTACGAGAATTTTTATGAAAGCCTTTTCATTTGCTTCTCTT  
CGATGGAAGTTTTATTTTCCAGAATGTATCCTAATTTTTGGCCTAATTCTTCTTCTGATGATCGATTCAACCTCT----  
--

GATCAAAAAGATATACCTTGGTTCTATTTTCATCTCTTCAACAAGTTTAGTAATGAGCATAACGGCCCTATTGTTCCGATG  
GAGAGAAGAACCTATGATTATCTTTTTCAGGAAATTTCCAAACGAACAATTTCAACGAAATCTTTCAATTTCTTATTTTAC  
TATGTTCAACTCTATGTATTCTCTATCCGTAGAGTACATTGAATGTACAGAAATGGCTATCACAGAGTTTCTCTTATTT  
GTATTAACAGCTACTCTAGGAGGAATGTTTTTATGCGGTGCTAACGATTTAATAACTATCTTTGTAGCTCCAGAATGTTT  
CAGTTTATGCTCCTACCTATTATCTGGATATACCAAGAAGGATGTACGGTCTAATGAGGCTACTATGAAATATTTACTCA  
TGGGTGGGGCAAGCTCTTCTATTCTGGTTTCATGGTTTCTCTTGGCTATATGGTTCATCCGGGGGAGAGATCGAGCTTCAA  
GAAATAGTGAATGGTCTTATCAATACACAAATGTATAACTCCCCAGGAATTTAATTGCGCTTCTATTTCATCACTGTAGG  
AATTGGGTTCAAGCTTTCCCTAGCCCCTTCTCATCAATGGACTCCTGACGTATACGAAGGATCTCCCACTCCAGTCGTTG  
CTTTTCTTTCTGTTACTTTCGAAAGTAGCTGCTTCAGCTTCAGCCACTCGAATTTTCGATATTCCTTTTTATTTCTCATCA  
AACGAATGGCATCTTCTTCTGGAATCCTAGCTATTCTTAGCATGATATTGGGGAAT

Ginkgo

TCATTGGTATCATGATGTATCCGAATGGAGAAGATGAGAATAAAGATATATATACATATATTAATTCTCCCGGTGGAACA  
GTAATACCGGAATCTCTCTTTATGATGCTATGCAA---  
TTTGTAGTACCAGATGTGCATACAATATGCATGGGGTTAGCTGCTTCGATGGGATCTTCTGTCTCAACTGGAGGGGAAAT  
TACTAAACGTATAGCATTACCTCACGCT---AGGGTTATGATCCACCAACCTGCTAGTTCTTAT---  
TATGACGGACAAGCAGGAGAATGTATCATGGAAGCAGAAGAGGTATTGAAACTTCGCGATAGCATTACGAATGTTTATGT  
ACAAAGAACAGGCAAACCTTTATGGGTCAATTTCCGAG---  
GACATGGAAAGAGATATTTTTATGTGAGCGGCAGAAAGCCCAAGCCTATGGCATTGTTGATCTCGTAGCGGTAGATAATAC  
TGAAGATCTCTTG-----

-----ATGGAT-----AAGTTCAAAGA-----GACGGAGAA-----  
GAATATATATCCTATCAACGACGTTTT-----



TTTGTACAACCAGATGTACAGACAGTATGTATGGGATTAGCCGCTTCAATGGGATCCTTTCTTTTGGCAGGAGGAGAAAT  
TACCAAACGTTTAGCATTCCCTCACGCT---AGGGTAATGATCCACCAACCCGCTAGTTCTTTT---  
TATGAGGCACAAACGGGAGAATTTATCCTGGAAGCGGAAGAGCTACTGAAAATGCGTGAAACTATCACAAGGGTTTATGT  
ACAAAGAACGGGCAAACCTTTATGGGTTATATCCGAA---  
GACATGGAAAGGGATGTTTTTATGTCAGCAGCAGAAGCCCAAGCTCACGGAATTGTAGATCTTGTAGCCGTTGAATAA--  
-----  
-----  
-----  
-----  
-----  
-----  
-----  
-----ATGGAG-----GAATCTCGAGCA-----TATTTAGAA-----  
CTCCATAGATCTCGACACCAGGACACC-----  
CTATACCCTCTTTTTTCCGGGAATCTATTTACGGACTAGCTTGTGGTCATGGG-----  
-TCC-----ATTTTT-----GTAGAAAAT---GTCGGTTAT-----  
AACAAATAATTTAGTTTACTAATTGTAACGTTTAATTACTCGAATGTATCAA-----  
CAGACTCATTTCATCATTTTTTACTAACGAT-----TCTAACAAAATCCTTTTATGGGTTATAAC-----AATCAT--  
-----  
TTTTATTCTCAAATAATATTAGAAGTTTTGTTGTCGTCGTTGAGATTCTATTTTCCCTACAATTTTGTATATCTTCTCT  
A-----AGGGAA-----TTCGAAATCGTAAAATCTTAT---ATAATTTGCGA-----  
TCAATTCATTCCATTTTTCCCTTTTTCGAAGATAAACTGATATATTTAAATCATGAGTCAGATATACGAATACCCTATCC  
TATCCACCTGGAAATCTTGGTTCAAATCCTTCGATATTGGATAAAAAGATGTCTCTTTCTTTCAATTTATTAAGGTTTTTTT  
TTTCTTATTATTATAATTGGAATAGTATT---TTTACT-----CCAAAAAATGGATTTCTACTTTTTTTTTCA---  
-----AAAAGTAAT---  
CCAAGATTTTTTTTGTTCCTATATAATTTATATGTATGGGAATATGAATCTATCTTTCTTTTCTACGTAACAAATCCTC  
T---AAGTTACGATTAATAATTTTTTCGCGTTTTTTTTGAGCGAATTTTTTCTATGAAAAAATAGAACAT-----  
-----CTTGTAGAA-----GTA-----TCT---GTT---AAGGATTGTTTCATATACC-----  
TTATCATTCTTTAAGGATACTTTTCATGCATTATGTAGATCAAGGAAAAATCCATTTTGGTTTTCAAAGAATACTCCTCT  
TTTGATAAATAAATGGAAATACTATTTTATCTATTTTATGGCAATGTCTTTTGATATTTGGTCTCGACCAGGAACGATCC  
ATATAAACCAATTA-----TCCCAACATTCATTTCACTTTTTGGGCTATTTTT-----  
TTAAGTATTCGGCCCAATCTTTTCAGTGGTACGAAATCAGATGTTGCAAAATTCATTTCTAATAAAAATGGTTATGAAAAG  
GCTTGATAACAATAGTTCCAATTATTCCTCTAATTAGATCATTGGCGAAAGCAAAATTTTGAATGTATTTGGCCATCCCA  
TTAGTAAGCCGGTTTTGGGCCAATTTATCTGATTTTGTATATTGACCGTTTTTGC GGATATGCCGAAATTTTTCTCAT  
TATTACAATGGA---  
TCCGCAAAAAAAGAGTTTTGTATCAAATAAGATATATACTTCGGCTTTCTTGTATAAAAACTTTGGCTCGTAAGCACAA  
AAGTACTGCG---CGCACTTTTTTG-----AAAAGATTAGGGTCAGAAAAATTATTGGAAGAATTCCTTTACAGAA-  
-----GAAGAAGAGACTTTTTCTTTGATTTTTCCA-----AGAACT---TCTTTTACTTTGAAGAGG-----  
TTATAT-----ATAGGTCGGATTTGGTATTTGGATATCTTGTTCAGAAAC-----GATTTTCGTCATCATTTT---  
-----  
-----ATGATAATTTAT-----TTAACAGAGATA---CAA---GAT-----  
ATCCATTTTTTTTTTTCAGATTGGAATCTTTT-----  
AAAGAGATATATGGAATTATATGGGTATTTGCCCTATTTTGATTCTTATATTGGGAATTACGATAAGTGTACTAGCAAT  
TGTATGGTTAGAAAGGGAAATATCCGCAGGGATACAACAACGTATTGGACCTGAATACACAGGTCCTTTTGGAGTTCTTC  
AAGCTCTAGCAGACCGGAACAAAATTACTTTTTCAAAGAGAATCTTATCCATCTAGAGGAGATATTCGTTTATTCAGTATA  
GGACCATCTATATCAGTCATATCGATTATAATAAGCTATTCAGTAATTCCTTTTGGCTATAACTTTGTTTTATCTGATCT  
GAATATTGGTGTTTTTTTATGGATTGCTATTTTCAGTATTGCTCCCATTGGACTTCTTATGTCCAGGATATGGGTCAAATA  
ATAAATATTCCTTTTTTGGGTGGTCTACGAGCAGCTGCTCAATCGATTAGTTATGAAATACCATTAECTCTA---  
TGTGTGTTATCAATATCTCTATTATCTAACAGTTTTAAGTACAGTTGATATAGTTGATGCACAATCAAATATAGTTTTTG  
GGGATGGAATTTGTGGCGTCAACCTATGGGTTTCATTGTTTTTCTAATCTCGTCCCTAGCAGAATGTGAAAGATTACCTT  
TTGATTTACCGGAAGCGGAAGAAGAACTAGTAGCGGGTTATCAAACCGAATACTCGGGTATCAAATTTGGTTTTATTTAT  
GTTGCTTCTATTTAAACCTATTCATTTCTTCTTATTTGTAACAGTTCTTTACTTTGGTGGTTCAAATATCTCT---  
ATTCCATACATATTCGTTTTCTGACTTTTTTTGAA-----  
ATAAATCAAACATATGGAGTTTTTGTAACGATAATTGGTATCTTTATTACACTAGCTAAAACCTTATTTATTCTTATTCCT  
TTCTATCGCAACAAGATGGACTTTGCCTAGGCTAAGAATAGATCAATTATTAATCTTGGGTGGAAATTTCTTTTACCCA  
TTTCTCTCGGCAATCTATTATTAACAACCTTCGTCTCAACTGTTTTTCACTGTAA-----  
-----  
ATGATCTGGCATGTACAGAATGAAAACCTTCAATTCGATTCTACAAGAATTTTTTATGAAAGCCTTTCATTTGCCTCTCTT

CGATGGAAGTTTTATTTTCCCAGAATGTATCCTAATTTTTGGCCTAATTCTTCTTCTGATGATTGATTCAACCTCT----  
--

GATCAAAAAGATATATCTTGGTTCTATTTTATCTCTTCAACAAGTTTAGTAATGAGCATAACGGCCCTATTGTTCCGATG  
GAGAGAAGAACCTATGATTAGCTTTTCGGGAAATTTCCAAACGAACAATTTCAACGAAATCTTTCAATTTCTTATTTTAC  
TATGTTCAACTCTATGTATTCCTCTATCCGTAGAGTACATTGAATGTACAGAAATGGCTATAACAGAGTTTCTGTTATTC  
ATATTAACAGCTACTCTAGGAGGAATGTTTTTATGCGGCGCTAACGATTTAATAACTATCTTTGTAGCTCTAGAATGTTT  
CAGTTTATGTTCTCTACTATCTGGATATACCAAGAAAGATGTACGGTCTAATGAGGCTACTACGAAATATTTACTCA  
TGGGTGGGGCAAGCTCTTCTATTCTGGTTCATGGTTTCTCTTGGCTATATGGTTCATCCGGGGGAGAGATCGAGCTTCAA  
GAAATAGTGAACGGTCTTATCAATACACAAATGTATAACTCCCCAGGAATTTTAATTGCACTTTTATTCATCACTGTAGG  
AATTGGGTTCAAGCTTTCCCCAGCCCCTTCTCATCAATGGACTCCTGACGTATACGAAGGATCTCCCCTCCAGTCGTTG  
CTTTTCTTTCTGTTACTTCGAAAGTAGCTGCTTCAGCTTCAGCCACTCGAATTTTCGATATCCCTTTTTATTTCTCATCA  
AACGAATGGCATCTTCTTCTGGAAATCCTAGCTATTCTTAGCATGATATTGGGGAAT

Gossypium

TTATTGGTCTTATGGTATATCTCAGTATAGAGAATGATACCAAAGATCTGTATTTGTTTATAAACTCTCCTGGCGGATGG  
GTAATACCCGGAGTAGCTATTTATGATACTATGCAA---  
TTTGTGAACCAGATGTGCATACAATATGCATGGGATTGGCTGCTTCAATGGGATCTTTTCTCCTGGCCGGAGGAGAAAT  
TACCAAACGTCTAGCATTCCCTCACGCT---AGGGTAATGATCCATCAACCTGCTAGTTCTTTT---  
TATGAGGCACAAACAGGAGAATTTATCCTGGAAGCGGAAGAACTACTGAAACTTCGCGAAAGCCTCACAAGGGTTTATGT  
ACAAAGAACGGGCAAGCCCCTATGGGTTGTATCCGAA---  
GACATGGAAGAGATGTTTTTATGTGAGCAACAGAAGCCCAAGCTCATGGAATTGTGGATCTTGTAGCGGTTAAA-----  
-----  
-----  
-----  
-----  
-----

-----ATGGAG-----GAATTTCAAGTA-----TATTTAGAA-----  
CTAAATAGATCCCGCCGACACGATTTT-----  
CTATACCCACTTATTTTTTCGGGAGTATATTTATGCACTTGCTCATGAGCATGGTTTA-----AATAAA-----  
-TCGATG---ATTTTT-----TTTGAAAT---CAGGGTTAT-----  
GGTAATAAATTCAGTTCACTAATTGTGAAACGTTTAAATCTTTCGAATGGATCAA-----  
CAGAATCGTTTTGATTAGTTCTGCTAATGAT-----TCCAACCAAATCCGGTTTTTGGGCACAAC-----AATAAT--  
-----TTGATTCTCAAATGATAGCGGTAGGATTTGCAGTCATTGTGGAAATTCATTTTCTTACGATTA---  
ATATCTTACTCA-----CAAGGG-----GCAGAAGTCGCAAATCTCAT-----AATTTACAA--  
-----

TCAATTCATTCAATATTTTCTTTTTTAGAGGACAAATTCACATTTAAATATGTGTTAGAGGCACTAATACCTCATCC  
CATCCATCTAGAAATCTTAGTTCAAGCCCTTCGCTACTGGGTAAAAGATGCTTCTTCTTTGCATTTATTACGGTTCTCTC  
TCTACGAGTATTGTAATTTGAAGAGTTTT---ATTACT-----CCAAAGAAATCTATTTTCGATT---TTT-----  
-----AAT---

CCAAGATTATTCTTGGTCCATATAATTCTCATAACATGTGAATACGAATCCATTTTCTTTTTCTCCGTAATCAATCTTC  
T---CATTTACGATCAACATCTTCTGGGGTCTTTCTTGAACGAATTTTTTCTATGGAAAAATAAAGTAT-----  
-----CTTGGCGAA-----GTC-----TTT---TAT---AATGATTTTCAGAACAAC-----

CTATGGTTGTTCAAAGACCCTTTCATACATTTTATTAGGTATCAAGGAAAGTCAATTTCTGGCCTCAAAGGATACGTCTCT  
TCTGATCAATAAGTGGAAATATTACTTTGTGCAATTTATGGCAATATTATTTTACCTGTGGTCTCAATCAGGAAGAGTCC  
GTATAAATCAATTA-----TCTAAATATTCTCTCGACTTTCTGGGCTATCTT-----

TCAAGTGTGCGATTAATCCTTTCAGTGGTACGGAGTCAAATGCTAGAAAATTCATTTCTAATAGATAATGCTGTGAAGAC  
GTTGGATACAAGAATTTCAATTTTTCGCTCATTGGATCATTGTCTAAGGCGAAATTTTGTAAACACATTAGGGCATCCCA  
TTAGTAAGCCGACGTGGGCCGATTCCCCGATTCTGATATTATTGACCGATTTGTGCGGATATCCAGAAATCTTTCTCAT  
TATCACAGTGGA---

TCTTCAAAAAAAAAAAGTTTGATCGAATAAAATATATACTTCGGTTTTCTTGTGTTAAAATTTGGCTCGTAAACACAA  
AAGTACTGTC---CGTGCTTTTTTG-----AAAAAATTAGGTTTCGGAA---

TTTTTGGGAAGAATTCTTTACGGAAACGGAAGAAGAACATGTTTTTTCTTTGATCTTCCCA-----AGAGGT---  
TTTTTTGCTATGCGAAAG-----GTCTAT-----AGGGGACGAATTTGGTATTTGGATATTATTTGTATCAAT-----  
-GCTCTGGTCAATCATTCA-----  
-----ATGATAATTTAT-----ACGACAGAAGTA---GAA---

GAT-----ATCAATTCCTTTTACACATTGGAATCTTTA-----  
AAAGAGGTCTATGGGATCATATGGATGTTGGTCCCTATTTTACTCTTGTATTGGGAATCACAATAGGTGTACTAGTAAT

TGTATGGTTAGAAAGAGAAATATCTGCAGGAATACAACAACGTATTGGGCCTGAATATGCCGGTCCTTTGGGCATTCTTC  
AAGCGCTAGCAGATGGAACAAAACACTGCTTTTTCAAAGAAAATATTCTTCCATCTAGAGGCAATACTCGTTTATTTAGTATT  
GGACCGGCTATAGCAGTCATATCAATTTTACTAAGTTTTTTCAGTAATTCCTTTTAGCTCTCGCCTTATTTTAGCCGATCT  
CAATATCGGTATTTTTTATGGATTGCCATTTCAAGTATTGCTCCCGTTGGACTTCTTATGTCAGGATACGGATCAAATA  
ATAAATATTCCTTTTTAGGTGGTCTGCGAGCTGCTGCTCAATCGATTAGTTATGAAATACCATTAACCTCTA---  
TGTGTTTTATCAATATCTCTATTATCTAACAGTTCAAGTACAGTTGATATAGTTGAGGCGCAATCAAATATGGTTTTTG  
GGGATGGAATTTGTGGCGTCAGCCAATAGGGTTTATCGTTTTTCTAATTTCTTCTCTAGCGGAATGCGAGAGATTACCTT  
TTGATTTACCAGAAGCGGAGGAAGAATTAGTAGCAGGGTATCAAACCGAATATTCAGGTATCAAATTTGGTTTTATTTTAC  
GTTGCTTCTATCTAAATCTATTACTTTCTTCGTTATTTGTAACAGTTCTTTACTTGGGGGGTTGGAATATTTCC---  
ATTCGGTACGTATTCGCCCTGAGCTATTTGAA-----  
ATAAATAAAATAAATGGAATCATTGGAACGACAATTGGTATCTTTATTACATTAGCTAAAACCTTATTTGTTTTTGTTTAT  
TTCTATCGCAACACGATGGACTTTACCTAGGTTAAGAATGGACCAATTATAAATCTCGGGTGGAAATTTCTTTTACCCA  
TTTCTCTCGGTAATCTATTATTAACAACCTTTTCCAACCTTCTTTCACTGTAA-----  
-----

ATGATCTGGCATGTACAGAATGAAAACCTTCAATTCTCGATTCTACGAGAATTTTTATGAAAGCCTTTCATTTGCTTCTCTT  
CGATGGAAGTTTTATTTTCCCAGAATGTATCCTAATTTTTGGCCTAATTTCTTCTTCTGATGATCGATTCAACCTCT----  
--

GATCAAAAAGATATACCTTGGTTATATTTTCACTCTTCAACAAGTTTAGTAATGAGCATAACGGCCCTATTGTTCCGATG  
GAGAGAAGAACCTATGATTAGCTTTTTCAGGAAATTTCCAAACGAACAATTTCAACGAAATCTTTCAATTTCTTATTTTAC  
TATGTTCAACTCTATGTATTTCTCTATCCGTAGAGTACATTGAATGTACAGAAATGGCTATAGCAGAGTTTCTGTTATTC  
GTATTAACAGCTACTCTAGGAGGAATGTTTTTATGCGGTGCTAACGATTTAATAACTATCTTTGTAGCTCCAGAATGTTT  
CAGTTTATGCTCCTACCTATTATCTGGATATACCAAGAAAGATGTACGGTCTAATGAGGCTACTACGAAATATTTACTCA  
TGGGTGGGGCAAGCTCTTCTATTCTGGTTTCATGGTTTTCTTGGCTATATGGTTTCATCCGGGGGAGAGATCGAGCTTCAA  
GAAATAGTGAATGGTCTTATCAATACACAAATGTATAACTCCCCAGGAATTTCAATTGCGCTTATATTCATCACTGTAGG  
AATTGGGTTCAAGCTTTCCCCAGCCCCTTCTCATCAATGGACTCCTGACGTATACGAAGGATCTCCCCTCCAGTCGTTG  
CTTTTCTTTCTGTTACTTTCGAAAGTAGCTGCTTCGGCTTCAGCCACTCGAATTTTCGATATTCCTTTTTATTTCTCATCA  
AACGAATGGCATCTTCTTCTGGAAATCCTAGCTATTCTTAGCATGATATTGGGGAAT

Helianthus

TGATTGGTCTTATGATATATCTCAGTATCGAGGATGATACCCAAGATCTGTATTTGTTTATAAACTCTCCTGGCGGATGG  
GTAATACCGGGAGTGGCTCTTTATGATACTATGCAA---

TTTGTGCAACCAGATGTACATACAATATGCATGGGATCAGCCGCTTCAATGGGATCTTTTATCCTGGTTCGGAGGAGAAAT  
TACCAAACGTCTAGCATTCCCTCACGCC---AGGGTAATGATCCATCAACCTGCTGGTTCTTTT---

TCTGAAGTAGCAACGGGAGAATTCATCCTGGAAGTGGGAGAAGTCTGAAACTACGTGAAACCCTGACAAGGGTTTATGT  
ACAAAGAACGGGCAAACCCGTATGGGTTGTATCCGAA---

GACATGGAAAGAGATGTTTTTATGTCAGCAACAGAGGCCCAAGCTTATGGAATTGTTGATCTTGTAGCGGTTGAATGA--  
-----ATG---AAAGAA-----CAAAAA-----

-----TGGATTCAT---GAAGTTTAATTACTGAATCG---CTTCCCAATGGC-----  
ATGTTCCGGGTTTCGTTTATGATAATGAAGATATGATTCTAGGTTATGTTTTCAGGAAAG-----

ATCCGACGTAGTTTTATACGAATATTGCCAGGA-----  
GATAGAGTCAAATTTGAAGTAAGTCGTTATGATTCAACCAGAGGTCGTATAATTTATCGACTCCGC-----  
-----AACAAAGATTTCGAAAGATTAG-----

-----ATGGAG-----AAATTCCAAAGG-----CTAGATAGATCT-----  
-CACTACTTC-----TTATATCCACTTATCTTTTCAGGAGTATATTTATGTACTTGTCTCATGATCATGGTTTA-----  
AATGGA-----TCG-----ATTTTG-----TTGGAAAAT---GCAGGTTAT-----

GACAATAAATCCAGTTTACTAATTGTGAAACGTTTAATCATTTCGAATGTATCAA-----  
CAGAATCATTGATTCTTTCTGTTAATGAT-----TCTAAACAGACTGCATTTTTGGGGCACAAC-----AAGAAT--  
-----TTTTATTCGCAAGTAATGTAGAGGTTTCTTCAACCATTATGAAATTCATTGTCTCTGCGATTA---

ATATCTTCCCTA-----GAAAGG-----AAAGGGGTAGTTAAATCCGAT-----AATTTACGA--  
-----

TCAATTCATTCCATATTTTTCTTTTTTAGAGGACAACCTTTTACATTTAAATTATGTATTAGATATACTAATACCTTACCC  
AGCTCATCTGGAATCTTGGTTTCAGGCTCTTCGCTATTGGATCAAAGATGCTTCTCTTTGCATTTATTAAGATTCTTTT  
TCCATGAGTGTATAATTGGGATAGTCTT---ATTACT---TCAAATTCAAAGAAAGCCAGTTCTTTT---TTTTCA---

-----AAAAGAAAT-----  
CACAGACTATTCTTCTTCTATATACTTCTTATGTATGTGAATATGAATCTGGCTTCTTATTTCTCCGTAACCAATCTTC  
T---CACTTACGATCAACATCTTCTGGAGCCCTTATTGAACGAATATATTTCTATGGAAAAATAGAGCAT-----  
-----CTTGAGAA-----GTC-----TTT---GCC---AGGACTTTTCAAGCGAAT-----



TTATGGTTCTTCAAAGATTCTTTTCATGCATTATGTTAGGTATCAAGGAAAATCAATTCTTGCTTCAAAGGGACGTTTCT  
TTTGATGAATAAAAAGGAAAGATTACTTTTTCAATTTCTGGAAATCTTATTTTTACCTGTGGTCTTATCCAGGAAGGATTT  
CTATAAACCAATTA-----TCCAATCATTCCCTTGACTTTCTGGGTTATCGT-----  
TCAAGTGTGCGTCTAAAGCCTTCAATGGTACGCGGTCAAATGCTAGAAAATACATTTTTTAATTAATAATGCTATTAAGAA  
GTTTGATAGTATTGTTCCAATTATGCCTCTGGTTGGATCGTTGGCTAAATCGAAATTTTGTAACGCATTGGGGCATCCTA  
TTGGTAAGGCAATTTGGGCCGATTTATCAGATTCTGATATTATTGAGCGCTTTGGCCGTATATACAGAAATCTTTCTCAT  
TATCATAGTGA---

TCTTCAAAAAAAAAAAGTTTGTATCGAGTAAAATATATACTTCGACTTTCTTGCTAGAACTTTAGCTCGTAAGCATAA  
AAGTACTGTA---CGTGCTTTTTTGG-----AAAAGATTGGTTCGCAA---TTATTGGAAGAGTTCTTTACGGAA-  
-----GAAGAACAAGTTTTTTCCTTGACCTTTCCA-----AGAGTT---TCTTCTATTTTCGCGAAGG-----  
TTATCT-----AGAAGGCGGATTTGGTATTTGGATATTGTTTGTATCAAT-----GATTTGGCCAATCATTAA-----  
-----ATGATAAATTGAT-----ACAACAGAAGTA---CAA---GCT-----  
ATCAATTCTTTTTCTAGATTGGAATCCTTA-----  
AAAGAGGTCTATGGGATCATATGGGTGCTTATCCCTATTTTTACTCCTGTATTAGGAATTACAATAGGTGTACTAGTCAT  
TGTTTGGTTAGAAAGAGAAATATCCGCGGGTATAACAACCGTATCGGTCTGAATACGCAGGACCTTTGGGAATTCTTC  
AAGCTCTAGCAGATGGTACCAAATTACTTTTTCAAAGAGAATCTTCTTCCATCTAGAGGAGATACTCGTTTATTTAGTATT  
GGACCATCTATAGCAGTCATATCAATTTTATTAAGTTATTTAGTAATTCCTTTTGGTTATCGCCTTGTTCTAGCCGATCT  
CAGTATTGGTGTTTTTTTATGGATTGCTATTTCAAGTATTGCTCCTGTTGGCCTTCTTATGTCAGGATATGGCTCAAATA  
ATAAATATTCTTTTTTAGGTGGTCTACGAGCTGCTGCTCAATCAATTAGTTATGAAATACCATTAACTCTA---  
TGTGTGTTATCAATATCTCTACTATCTAACAGTTCAAGTACAGTTGATATAGTTGAAGCGCAGTCAAATATGGTTTTTG  
GGGATGGAATTTGTGGCGTCAACCTATAGGGTTTCTAGTTTTTCTAATTTCTTCCCTAGCCGAGTGTGAACGATTACCTT  
TTGATTTACCAGAAGCAGAAGAAGAAATTAGTAGCAGGTTATCAAACCGAATATTCGGTATCAAATTTGGTTTTATTTTAC  
GTTGCTTCATATTTAAATCTACTGGTTTCTTCAATTATTTGTAACAGTTCTTTACTTGGGGGGTTGGAATCTTTCT---  
ATTCCGTACATACCTGTTCCCGAGCTTTTTGAT-----

ATTACTAAAAGAGGTAGAGTCTTTGGAACAATAATTGGTATCTTTATTACATTAGCTAAAACATATTTGTTCTTGTTCAT  
TCCTATCGCAACAAGATGGACTCTACCGCGGCTGAGAATGGATCAATTATTAATCTTTGGATGGAAATTTCTTTTACCTA  
TTTCTCTAGGTAATCTATTATTAACAACCTTCTTCCAACCTTCTTTCACTGTAA-----  
-----  
ATGATCTGGCATGTACAGAATGAAAACCTTCAATTCTCGATTCTACGAGAATTTTTATGAAAGCCTTTCATTTGCTTCTCTT  
CGATGGAAGTTTGATTTTCCCAGAATGTATCCTAATTTTTGGCCTAATTCTTCTTCTGATGATCGATTCAACCTCT-----  
--

GATCAAAAAGATATACCTTGGTTATATTTTCATCTCTTCAACAAGTTTAGTAATGAGCATAACGGCCCTATTGTTCCGATG  
GAGAGAGGAACCTATGATTAGCTTTTTCGGGAAATTTCCAAACGAACAATTTCAACGAAATCTTTCAATTTCTTATTTTAC  
TATGTTCAACTCTATGTATTCTCTATCCGTAGAGTACATTGAATGTACAGAAATGGCTATAACAGAGTTTCTCTTATTC  
ATATTAACAGCTACTATAGGAGGAATGTTTTATGCGGTGCTAACGATTTAATAACTATCTTTGTAGCTCCAGAATGTTT  
CAGTTTATGCTCCTACCTATTATCTGGATATACGAAGAAAGATGTACGGTCTAATGAGGCTACTATGAAATATTTACTCA  
TGGGTGGGGCAAGCTCTTCTATTCTGGTTTCATGTTTTCTTGGCTATATGGTTCATCCGGGGGAGAGATCGAGCTTCAA  
GAAATAGTGAATGGTCTTATCAATACACAAATGTATAACTCCCCAGGAATTTCAATTGCGCTCATATTCATCACTGTAGG  
AATTGGGTTCAAGCTTTCCCGAGCCCTTCTCATCAATGGACTCCTGACGTATACGAAGGATCTCCCACTCCAGTCGTTG  
CTTTTCTTTCTGTTACTTTCGAAAGTAGCTGCTTCAGCTTCAGCCACTCGAATTTTCGATATTCCTTTTTATTTCTCATCA  
AACGAATGGCATCTTCTTCTGGAAATCCTAGCTATTCTTAGCATGATATTGGGGAAT

*Illicium*  
TTGTTGGTCTCATGGTATATCTCAGTATAGAAGATGATACCAGGGATCTCTATCTGTTTATAAACTCCCCGGCGGATGG  
GTAATACCAGGAATAGCTATTTATGATACTATGCAA---  
TTTGTGCCACCAGACTACATACAATATGCATGGGATTAGCCGCTCAATGGGATCTTTCTCCTGGCCGGAGGAGAAAT  
TACCAAACGTCTAGCATTTCCCTCACGCT---AGGGTTATGATCCACCAACCTGCTAGTTCTTTT---  
TATGAGGCGCAAACAGGAGAATTTATCTTGAAGCGGAGGAGCTACTGAAACTCCGCGAAACCATCAAGAGTTTATGC  
ACAAAGAACCGCAACCCTTTATGGGTTGTATTGAA---  
GACATGGAAAGGGATGTTTTATGTTCAGCAACAGAAGCCCAAGCTCACGGCATTGTTGATCTTGTAGCGGTGCGAAATAC  
CGGAGATTTTCGCG-----  
-----  
-----  
-----  
-----

-----ATGGAG-----GAATTACAAGGA-----TATTTAGGA-----



GTATTTGATGGACTAGCTATTTACGATGCCATGAAAAATATTATGACGCAAGAAGTCCGGACAACGGTGTACGGACAAGC  
CGCGTCAATGGCAAGTTTGGCTCCTGGCTTCAGGAGAAAAAGGCCACCGTATTGCACTCCCTCACTCT---  
GAGATAATGTTGCACGAACCTTCTATGAGTCCT---  
ACCCGGGGAAAAGTGGAAATTTCTTCTATCGGAATGTGACGTTCTCGCTAGCCTAAAAGAAAAGAAATGCTAAACATATATGT  
ACTCGAAACGGGCAAAGACCGATTAGTTT--  
TTCCGAGGAAGTCTACAAAGAGATCATTATTTGGAACCGAAATAGCCCTCGAATGTGGAATTATTGA-----  
-----ATG---AAGGAAAAAGAAGCAAAA-----  
-----TGGGTTGTT---GAGGGTTTAGTCACAGAAGGG---CATCCCAGTGGT-----  
ATGTTCCGGGTTTCAAGTTAGATAATGGAGCTCGGGTTCTAGGTTATATTTTCAGGAAAAG-----  
ATCCGGCGTAAGGCTATACGGATAATGCAAGGA-----  
GATAGAGTCCAAATTGAACTAAGCCATTATGATTTAACCAAAAGGACGTATAATTTATCGACTCCCCCCCCCCCCCATCCC  
CAAGCCCAAGGATTCGGAGGAT-----GATTCCGAGGATTAG-----  
-----  
-----ATGCAG-----GAAATCAAAAAGA-----TATTTACAG-----  
CTAGATAGACCTCAACAACACGACTTT-----  
TTATATCCACTTATCTTTTCAAGGAGTATATTTATGCACTTGCTCATGATCGGGGTTTC-----AATAGA-----  
-TCC-----AGTTTG-----TTGGAAAAT---CCGGGTTAT-----  
GACAATAAATCCAGTTTACTAATTGTAACCGGTTAATTACTCGAATGTATCAA-----  
CAGAATCATTTTTGGATTTCTTCTAATGAT-----TCGAACCAAAAATCCATTTTTTGGGCGCAAC-----AAGAAT--  
-----TTGTATCCTCAAATTTCTATCCGAGGGGTTTGCATTCTGGAACCTCCATTTTTCTCTACGATTA---  
ATACTTTCTCTA-----GAAAGGAAAAA-----AAAAAGATAGTAAAATCTCAG-----AATTTACGA--  
-----  
TCAATTCATTCAATATTTTCTTTTTTAGAGGATAACTTTTACATTTCCCTTTTGTCTTAGATATACTCATACCCACCC  
CATCCATCTGGAAATCTTGGTTCAAACCTTTCGCTGTTGGGTAAAAGATGCCTCTTCTTTGCATTTATTACGATTCTTTC  
TTCACGAGTATTGGAATTGGAATAGTCTT---AGTACT-----CCAAAGAAAGCCAGTTCTTCT---TTTTCA---  
-----AAAAGGAAT---  
CAAAGATTATTTCTTCTTATATAATTCTCATGTATGTGAATACGAATCTATTTTCTGCTTTTCTACGTAACCAATCTTTC  
T---CATTTACGATCAACATCTTCTGGGGCTCTTCTTGAACGAATCTATTTCTATGGAAAAATAGAACGT-----  
-----CTTGTGAAC-----GTC-----TTT---CTT---AAGGATTTTCAGATCAAC-----  
CTATGCTTGGCTCAAGGATCCTTTTTATGCATTATGTTAGATATCAAGAAAAATCAATTCTGGCGTCAAAGGGGACGCCTCT  
TTTTCATGACTAAATGGAAATATTACCTTGTACCTTTTTGGCAATGTTATTTTTCGCTGTGGTTTTATCCAAGAAGGATTT  
ATCTAAACCAATTA-----TCTAAGAATTTCTTGAATTTGGGGGCTATCTT-----  
TCAAGTGTGCGACTAAATGCTTCAAGTACGAGTCAAATTTCTAGAAAATTCATTTCTAATCAATAATGCTATTAATAA  
GTTGATACTTTTTGTTCCAATTATTCCTCTGATTGGATCATTGGCTAAAGCACAATTTTTGTAACGTATTAGGGTATCCCA  
TTAGTAAGCTGGTTCCGACTGATTTATCAGATTCTGATATTATTGATCGATTTGGGCGTATATGCAGAAATCTTTCTCAT  
TATCATAGCGGA---  
TCTTCCAAAAGAAAGAGTTTGTATCGAATAAAGTATATACTTCGACTTTCTTGTGCTAGAACCTTGGCTCGGAAACACAA  
AAGTACTGTA---CGTGCTTTTTTG-----AAAAGATTAGGCTCGGAA---TTATTGGAAGAATTTCTTATGTCG-  
-----GAAGAACAAGTTCTTTCTTTGACCTTCCCA-----AAAGCT---TCTTCCACGTTGCGGGGA-----  
GTATAT-----CGAAGTCCGATTTGGTTTTTGGATATTATTTGTCTCCAC-----GATCTGGTCAATCAGAAATAA--  
-----  
-----ATGATAATTTAT---AATACAACAGAACTA---CAA---GCT-----  
ATCCATTCTTTTTCCAGATTGGAATTCTTA-----  
AAAGAAGTCTATGGGAGCATATGGGTGCTTATCCCTATTTTACTCTTGTATTAGGAATCACACTAGGTGTACTAGTAAT  
TGTTTTGGTTAGAAAAGAGAAATATCTGCAGGGATAACAACGATTTGGACCTGAATACGCTGGCCCCCTTGGGAATTTCTTC  
AAGCTCTAGCAGATGGTACAAAACACTACTTTTCAAAGAGAATCTTTTCCATCTAGAGGGGATACTCGTTTATTTCACTATC  
GGCCATCCATAGCAGTCATATCCATTTTACTAAGTTATTAGTAATTTCTTTTGGTTATCGCCTTATTTTAGGCGATCT  
TAGTATTGGTGTTTTTTATGATCGCTGTTTCAAGCCTTGCTCCATTGGACTTCTTATGTCGGGATATGGATCAAATA  
ATAAATATTTCTTTTTAGGTGGTTTTAAGAGCTGCTGCTCAATCAATTAGTTATGAAATACCATTAACCTCTA---  
TGTGATTGTCAATATCTCTACTATCTAACAGTTTTAGTACAGTTGATATAGTTGAAGCGCAATCAAAAATATGGTTTTTG  
GGGGTGAATTTGTGGCGTCAACCTATAGGGTTTATTGTTTTTCTAATTTCTTCTCTAGCCGAGTGTGAGAGATTACCTT  
TTGATTTACCAGAAGCGGAAGAGGAATTAGTAGCAGGTTATCAAACCGAATATTAGGATCAAATTTGGTTTTATTTTAT  
GTTGCTTCGTATCTGAATCTACTAGTTTCTTCAATTATTTGTAACAGTTCTTTACTTGGGAGGTTGGAATCTTTCC---  
ATTCCGTACCTATTCGTTTCTGAGCTTTTTTGAA-----  
AGAGGTAAAGTTTTTGAACAATAATTTGTATCTTTATTACATTAGCTAAAACCTATTTGTTCTTGTTCATTTCTATTGC  
ACAAGATGGACTTTACCGAGATTAAGAATGGACCAACTATTAATCTTGGATGGAATTTCTTTTACCTATTTCTCTAG  
GTAATCTATTATTAACAACCTCATTCCAATTTCTTTCACTGTAA-----

-----  
ATGATCTGGCATGTACAGAATGAAAACCTTCATTCTCGATTCTACGAGAATTTTTATGAAAGCCTTTCATTTGCTTCTCTT  
CGATGGAAGTTTGATTTTCCCAGAATGTATCCTAATTTTTGGCCTAATTTCTTCTTGATGATCGATTCAACCTCT----

--  
GATCAAAAAGATCTACCTTGGTTCTATTTTCATCTCTTCAACAAGTTTAGTAATGAGCATAACGGCCCTATTGTTCCGATG  
GAGAGAAGAACCTATGATTAGCTTTTCGGGAAATTTCCAAACGAACAATTTCAACGAAATCTTTCAATTTCTTATTTTAC  
TATGTTCAACTCTATGTATTCCTCTATCCGTAGAGTACATTGAATGTACAGAAATGGCTATAACAGAGTTTCTCTTATTC  
GTATTAACAGCTACTCTAGGAGGAATGTTTTTATGCGGTGCTAACGATTTAATAACTATCTTTGTAGCTCCAGAATGTTT  
CAGTTTCTGCTCCTACCTATTATCTGGATATACCAAGAAAGATGTACGGTCTAATGAGGCTACTATGAAATATTTACTCA  
TGGGTGGGGCAAGCTCTTCTATTCTGGTTCATGCTTTCTCTTGGCTATATGGTTCATCCGGGGGAGAGATCGAGCTTCAA  
GAAATAGTGAATGGTCTTATCAATACACAAATGTATAACTCCCGAGAAATTTCAATTGCGCTCCTATTCATCACTGTAGG  
AATTGGGTTCAAGCTTTCCCGAGCCCTCTCATCAATGGACTCCTGACGTATACGAAGGATCTCCCACTCCAGTCGTTG  
CTTTTCTTTCTGTTACTTTCGAAAGTAGCTGCTTCAGCTTCAGCCACTCGAATTTTCGATATTCCTTTTTATTTCTCATCA  
AACGAATGGCATCTTCTTCTGGAAATCCTAGCTATTCTTAGCATGATATTGGGAAAT

Lactuca

TTATTGGTCTTATGATATATCTCAGTATCGAGGATGATACCAAAGATCTGTATTTGTTTATAAACTCTCCTGGCGGATGG  
GTAATACCGGGGTGGCTCTTTATGATACTATGCAA---  
TTTGTGCAACCAGATGTACATAACAATATGCATGGGATCAGCCGCTTCAATGGGATCTTTTATCCTGGTCCGAGGAGAAAT  
TACCAAACGTCTAGCATTCCCTCACGCT---AGGGTAATGATCCATCAACCTGCTGGTCTTTT---  
TCTGAAGTAGCAACGGGAGAATTCATCCTGGAAGTGGGAGAAGTGTGAAACTACGTGAAACCCTGACAAGGGTTTATGT  
ACAAAGAACGGGCAAACCCCTATGGGTTGTCTCCGAA---  
GACATGGAAGAGATGTTTTTATGTGCAACAGAGGCCAAGCTTATGGAATTGTTGATCTTGTAGCGGTTGAATGA--  
-----ATG---AAAGAA-----CAAAA-----  
-----TGGATTCAT---GAAGGTTTAATTACTGAATCG---CTTCCCAACGGC-----  
ATGTTCCGGGTTTCGTTTATGATAATGAAGATATGATTCTAGGTTATGTTTCAGGAAAG-----  
ATCCGACGTAGTTTTATACGGATACTGCCAGGA-----  
GATAGAGTCAAAATTGAAGTAAGTCGTTATGATTCAACCAGAGGTCGTATAATTTATCGACTCCGA-----  
-----AACAAAGATTGAAAGATTAG-----  
-----

-----ATGGAG-----AAATTCCAAAGC-----TATTTAGGG-----  
CTAGATAGATCTCAACAACACCCTTC-----  
TTATATCCACTTATCTTTTCAGGAGTATATTTATGTACTTGCTCATGATCATGGTTTA-----ACTAGA-----  
-TCG-----ATTTTG-----TTGGAAAAT---GCAGGTTAT-----  
GACAATAAATCCAGCTTACTAATTGTGAAACGTTTAAATCAATCGAATGTATCAA-----  
CAGAATCATTGATTCTTTTCGGTTAATAAT-----TCTAAACAGACTCCATTTTTGGGGCACAAC-----AAGAAT--  
-----TTTTATTCGCAAGTAATGTCCGAGGTCCTTCAATCATTATGGAAATTCATTGTCTCTGCGATTA---  
ATATCTTACCTA-----GAAAGG-----AAAGGGGTAGTCAAATCCGAT-----AATTTACGA--  
-----

TCAATTCATTCAATATTTTTCTTTTTTAGAGGACAACCTTTTACATTTAAATTATGTATTAGATATACTAATACCTTACCC  
AGCCCATCTGGAAATCTTGGTTTCAGGCTCTTCGCTATTGGATAAAAGATGCTTCCTCTTTGCATTTATTAAGATTCTTTC  
TCCATGAGTGTATAATTGGGATAGTCTG---ATTACT---TCAAATTCAAAGAAAGCCAGTTCTTCT---TTTTCA---  
-----AAAAGAAAT---

CACAGACTATTCTTCTTCTATATACTTCTCATTATGTGAATATGAATCCGGCTTCCTCTTTCTCCGTAACCAATCTTC  
T---CACTTACGATCAACATCTTCTGGAGCCCTTATTGAACGAATATATTTCTATGGAAAAATAGATCAT-----  
-----CTTGCAGAA-----GTC-----TTT---GCC---AGGGCTTTTCAAGCGAAT-----  
TTATGGTTGTTCAAAGATCCTTTTCATGCATTATGTTAGGTATCAAGGAAAATCCATTCTTGGTTCAAAGGGACGTTTCT  
TTTGTGATAAATGGAAATATTACTTTGTCAATTTCTGGAAATCTTATTTTTACCTGTGGTCTCAACCAGGAAGGATTT  
ATATAAACCAATTA-----TCCAATCATTCCCTTGACTTTCTGGGTTATCGT-----  
TCAAGTGTGCGGCTAAAGCCTTCAATGGTACGCAGTCAAATGCTAGAAAATGCATTTATAAATTGAAAATGCTATTAAGAA  
GTTTGAGACTATTGTTCCAATTATGCCTTTGATTGGATCATTGGCTAAATCTAAATTTTGAATGCATTGGGGCATCCTA  
TTGGTAAGGCGATTTGGGCCGATTTCTCAGATTCTGATATTATTGACCGCTTTGGGCGTATATACAGAAATCTTTCTCAT  
TATCATAGTGGA---  
TCTTCAAAAAAAGAGTTTGTATCGAGTAAAGTATATACTTTCGACTTTCTTGTGCTAGAACTTTAGCTCGTAAGCATAA  
AAGCACTGTA---CGTGCTTTTTTG-----AAAAGATTCCGGCTCGGAA---TTATTAGAAGAATCTTTTACGGAA-  
-----GAAGAACAAGTTTTTCCCTGACCTTTCCA-----AGGGTT---TCTTCCATTTTCGCGAAGG-----  
TTATCT-----AGAAGGCGGATTTGGTATTTGGATATTATTTGTATCAAT-----GATTTGGCCAATCATGAATGA--  
-----

-----ATGATAATTGAT-----ACAACAGAAGTA---CAA---GCT-----  
ATCAATTCTTTTTCTATATTGGAATCCTTA-----  
AAAGAGGTCTATGGGATCATATGGATGCTTATTCCCTATTTTTACTCTTGTATTAGGAATCACAATAGGTGTACTAGTAAT  
TGTTTTGGTTAGAAAGAGAAATATCTGCGGGTATAACAACAGTATTGGTCCTGAATACGCAGGACCTTTGGGAATTCTCC  
AAGCTCTAGCAGATGGTACCAAATTACTTTTTCAAAGAGAATCTTCTCCATCTAGAGGAGATACTCGTTTATTTCAGTATT  
GGACCATCTATAGCAGTTATATCCATTTTTATTAAGTTATTTAGTAATTCCTTTTAGTTATCACCTTGTCTAGCCGATCT  
CAGTATCGGTGTTTTTTTTATGGATTGCTATTTCAAGCATTGCTCCTGTGCGGCCTTCTTATGTCAGGATATGGCTCAAATA  
ATAAATATTCTTTTTTAGGTGGTCTACGAGCTGCTGCTCAATCAATTAGTTACGAAATACCATTAACTCTA---  
TGTGTGTTATCAATATCTCTACTATCTAACAGTTCAAGTACAGTTGATATAGTTGAAGCGCAGTCAAAATATGGTTTTTG  
GGGATGGAATTTGTGGCGTCAACCTATAGGCTTTCTAGTTTTCTAATTTCTTCCCTAGCCGAGTGTGAACGATTACCCT  
TTGATTTACCAGAAGCAGAAGAAGATTAGTAGCAGGTTATCAAACCGAATATTCCGGTATAAAATTTGGTTTTATTTTAC  
GTTGCTTCATATTTAAATCTACTAGTTTTCTTATTATTTGTAACAGTTCTTTACTTGGGGGTTGGAATCTTTCT---  
ATTCCGTACATATTTGTTCCCGAGTTTTTTGAA-----  
ATTACTAAAAGGGGTAGAGTCTTTGGAACAATAATTGGTATCTTTATTACATTAGCTAAAACCTTATTTGTTCTTGTTCAT  
TCCTATCGCAACAAGATGGACTTTACCGAGACTGAGAATGGACCAATTATTAATCTTGGATGGAAATTTCTTTTACCTA  
TTTCTCTAGGTAATCTATTATTAACAACCTGTTCCCACTTATTTCACTGTAA-----

ATGATCTGGCATGTACAGAATGAAAACCTTCAATCTCGATTCTACGAGAATTTTTATGAAAGCCTTTCATTTGCTTCTCTT  
CGATGGAAGTTTGATTTTCCAGAATGTATCCTAATTTTTGGCCTAATTTCTTCTTCTGATGATCGATTCAACCTCT----

-----  
GATCAAAAAGATATACCTTGGTTATATTTTCATCTCTTCAACAAGTTTAGTAATGAGCATAACGTCCCTATTGTTCCGATG  
GAGAGAGGAACCTATGATTAGCTTTTCCGGAAATTTCCAAACGAACAATTTCAACGAAATCTTTCAATTTCTTATTTTAC  
TATGTTCAACTCTATGTATTCCTCTATCCGTAGAGTACATTGAATGTACAGAAATGGCTATAACAGAGTTTCTCTTATTC  
GTATTAACAGCTACTATAGGAGGAATGTTTTTATGTGGTGCTAACGATTTAATAACTATCTTTGTAGCTCCAGAATGTTT  
CAGTTTATGCTCCTACCTATTATCTGGATATACCAAGAAAGATGTACGGTCTAATGAGGCTACTATGAAATATTTACTCA  
TGGGTGGGGCAAGCTCTTCTATTCTGGTTTCATGGTTTTCTTGGCTATATGGTTTCATCCGGGGGAGAGATCGAGCTTCAA  
GAAATAGTGAATGGTCTTATCAATACACAAATGTATAACTCCCCAGGAATTTCAATTGCGCTCATATTCATCACTGTAGG  
AATTGGGTTCAAGCTTTCCCGAGCCCTTCTCATCAATGGACTCCTGACGTATACGAAGGATCTCCCACTCCAGTCGTTG  
CTTTCTTTCTGTTACTTCGAAAGTAGCTGCTTCAGCTTCAGCCACTCGAATTTTCGATATTCCTTTTTATTTCTCATCA  
AACGAATGGCATCTTCTTCTGGAAATCCTAGCTATTCTTAGCATGATATTGGGGAAT

Liriodendron

TTGTTGGTCTCATGGTATATCTCAGCATAGAGGATGATACCAGGGATCTTTATTTGTTTATAAACTCTCCCGGCGGCTGG  
GTAATACCAGGAATATCTATTTATGATACTATGCAA---  
TTTGTGCCACCAGATGTGCATACAATATGCATGGGATTAGCCGCTTCAATGGGATCTTTCATCCTGGTTCGGAGGAGAAAT  
TACCAAACGTCTAGCATTCCCTCACGCT---AGGGTTATGATCCACCAACCTGCTAGTTCTTTT---  
TATGAGGCACCCACAGGAGAATTTATCCTGGAAGCGGAAGAATACTGAAACTCCGCGAAACCCTCACAAGGGTTTATGT  
ACAAAGAACGGCAATCCTTTATGGGTTGTATCCGAA---  
GACATGGAAGAGATGTTTTTATGTCAGCAGCAGAAGCCCAAGCTCATGGCATTGTTGATCTTGTAGCGGTCGAA-----  
-----ATG---AAAGAA-----CAAAAA-----  
-----TTGATTCAT---GAAGGTTTAAATTACTGAATCA---CTTCCCAATGGT-----  
ATGTTCCGGGTTTCGTTTAGATAATGAAGATCTGATTCTAGGTTATGTTTCCGGGGAGG-----  
ATCCGACGAAGTTTATACGGATACTACCAGGA-----  
GATAGAGTAAAAATCGAAGTAAGTCGTTATGATTCAACCAGGGGACGTATAATTTATAGACTTCGC-----  
-----AACAAAGATTGGAACGATTAG-----

-----ATGGAG-----GAATTACAAGGA-----TATTTAGAA-----  
ATAGATAGATCTAGGCAACAACACTTC-----  
CTATATCCGCTTCTATTTTACGAGGATATCTACGCACTTGCCCATGATCATGGTTTA-----AATGGA-----  
-TCG-----ATTTTTTACGAACCTATGGAAAAT---TTAGGTTAT-----  
GACAATAAATCCAGTTCACTAATTGTGAAACGTTTAAATTACTCGAATGCATCAA-----  
CAGAATCATTGATTATTTTCGGTTAATGAT-----TCCAACGAAAATGGATTTCGTTGGGCACAAC-----AAGAGT--  
-----TTTTATTCTCAAATGGTATCAGAGGGTTTTGCAGTCATTATGGAAATTCATTCTCGCTGCGATTA---  
GTATCTTCCCTA-----GAAGAA-----AAAGAAATAGCAAAATCTCAT-----AATTTACGA--  
-----

TCTATTCATTCAATATTTCCCTTTTTTCGAGGACAAATATCACATTTAAATCATGTGTCAGATATACTAATACTCATCC  
CATCCATCTGGAAATCTTGGTTCAAACCTTCACTGCTGGATACAAGATGCCCCCTCTTTGCATTTATTGCGATTCTTTT  
TCCACGAGTATCGTAATTCGAATAGTCTC---ATTACT-----CCAAAGAAATCCATTTCTCTT---TTTTCA---

-----AAAGAGAAT---  
CAAAGATTCTTCTTGGTTCCTATATAATTCTCATGTATATGAATGTGAATCCGTATTAGTGTTCCTCCGTAAACAATCTTC  
T---CATTTACGATCAACATCCTCTGGAACCTTTCTTGAGCGAACACATTTCTATGGAAAAATAGAACAT-----  
-----CTTGTAGTA-----GTG-----CTT---CGT---AATGATTTTCAGAAGACC-----  
CTATGGTTGTTCAAGGACCCTTTTCATGCATTATGTCAGATATCAAGGAAAATACATTCTAGCTTCAAAGGGGACTCATCT  
TCTGATGAAGAAATGGAAATCTCACCTTGTCAATTTTTGGCAATGTCATTTTTACTTGTGGTCTCGACCCGGACAGGATCC  
ATATAAACCAATTA-----TACAATCATTCTTCTATTTTTCTGGGCTATCTT-----  
TCAAGTGTACGACTAAACACTTCGGCGGTAAGGATTCAAATGCTAGAGAATTCATTTCTAATAGATACTTCTATTAATAA  
ATTCGAGACCCTAGTCCCAATTATTTCTCTGATTGGATCAGTGGCTAAAGCGAAATTTTGTAACGTATCAGGGCATCCCA  
TTAGTAAGTCGGTCCGGCCGATTTCGTAGATTCTGATATTATAAATCGATTTGGGCGGATATACAGAAATCTTTCTCAT  
TATCACAGTGGA---  
TCCTCAAAAAAACAGACTTTGTATCGAATAAAGTATATACTTCGACTTTCGTGTGCTAGAACTTTGGCTCGTAAACATAA  
AAGTACGGTA---CGCGCTTTTTTG-----AAACGATTAGGTTTCGGAA---TTCTTGGAGGAATTCCTTACAGAG-  
-----GAAGAACAAGTTCTTTCTTTGATTTTCCAA-----AGAAAC---TCTTTTCTTCTTATAGG-----  
TCACAT-----AGAGAACGGATTTGGTATTTGGATATTATCCGTATCAAT-----GACCTGGCCAATCATTCA-----  
-----

-----ATGATAATTGAT-----ACGACAGAAGTA---CAA---GCT-----  
ATCAATTCTTTTTCCAGATCGGAATCCTTA-----  
AAAGAGGTCTATGGCCTCGTATGGTTGCTTGTCCCTATTTTTACTCCTGTATTGGGAATCACAATAGGTGTACTCGTGAT  
TGTGTGGTTAGAAAGAGAAATATCCGCAGGGATACAACAACGTATTGGGCCCGAATATGCCGGTCCCTTGGGAATCTTC  
AAGCTCTAGCAGATGGGACCAAACACTTTTTCAAAGAGGATCTTCTACCATCTAGAGGAGATATTCGTTTATTTCAGTATC  
GGACCATCTATAGCGGTCAATCAATTCTACTAAGTTATTAGTAATTCCTTTTGGCTATCGTCTTGTCTAGCCGATCT  
CAGTATCGGTGTTTTTTTTATGGATCGCTATTTCCAGTATTGCTCCTATTGGACTTCTTATGTCAGGATATGGATCGAATA  
ATAAATATTCCTTTTTCAGGTGGTCTACGAGCTGCTGCTCAATCTATTAGTTATGAAATACCATTAACCTCA---  
TGTGTGTTATCAATATCTCTACTATCTAACAGTTCAAGTACAGTTGATATAGTTGAGGCACAGTCAAAATATGGGTTTGG  
GGGATGGAATCTGTGGCGTCAACCTATAGGGTTTATAGTTTTTCTAATTTCTTCCCTAGCGGAATGTGAGAGATTACCCT  
TTGATTTACCAGAAGCAGAGGAGGAATTAGTAGCAGGTTATCAAACCGAATATTCAGGTATCAAATCTGGTTTTATTTTAC  
GTTGCTTCTTACCTAAATCTACTAGTTTCTTTCATTATTTGTAACAGTTCTTTACTTGGGCGGATGGAATCTTTCT---  
ATTCGTACATTTCTTGAACCTTTTCGGA-----  
ATAAATAAAACAGGTGGAGTCTTTGGAACGACAATTGGTATCTTTATTACATTAGCTAAAGCTTATTTGTTCTGTTTCAT  
TCCTATCACAACAAGATGGACTTTTACCTAGGATGAGAATGGACCAACTATTAATCTTGGATGGAAATTTCTTTTACCTA  
TTTCTCTAGGTAATCTATTATTGACAACCTTCTTCCCAACTCCTTTTACTGTAA-----  
-----

ATGATCTGGCATGTACAGAATGAAAACCTTCAATTCTCGATTCTACGAGAATTTTTATGAAAGCGTTTCATTTGCTTCTCTT  
CCATGGAAGTTTCATTTTCCCAGAATGTATCCTAATTTTTGGCCTAATTTCTTCTTCTGATGATCGATTCAACCTCT----  
--  
GATCAAAAAGATATACCTTGGTTATATTTTCATCTCTTCAACAAGTTTAGTAATGAGCATAACGGCCCTATTGTTCCGATG  
GAGAGAAGAACCTATGATTAGCTTTTCGGGAAATTTCCAAACGAACAATTTCAACGAAATCTTTCAATTTCTTATTTTAC  
TATGTTCAACTCTATGTATTCCTCTATCCGTAGAGTACATTGAATGTACAGAAATGGCTATAACAGAGTTTCTGTTATTC  
GTATTAACAGCTACTCTAGGAGGAATGTTTTATGTGGTGCTAACGATTCAATAACTATCTTTGTAGCTCCAGAATGTTT  
CAGTTTATGCTCCTACCTATTATCTGGATATACCAAGAGAGATGTACGGTCTAATGAGGCTACTACGAAATATTTACTCA  
TGGGTGGGGCAAGCTCTTCTATTCTGGTTCATGGTTTTCTTGGCTATATGGTTCATCCGGGGGAGAGATCGAGCTTCAA  
GAAATAGTGAATGGTCTTATCAAGACACAAATGTATAACTCCCCAGGAATTTCAATTGCGCTTATATTCATCACTGTAGG  
AATTGGGTTCAAGCTTTCCCCAGCCCCTTCTCATCAATGGACTCCTGACGTATACGAAGGATCTCCCCTCCAGTCGTTG  
CTTTTCTTTCTGTTACTTCGAAAGTAGCTGCTTCAGCTTCAGCCACTCGAATTTTCGATATTCCTTTTTATTTCTCATCA  
AACGAATGGCATCTTCTTCTGGAAATCCTAGCTATTCTTAGCATGATATTGGGGAAT

Lotus  
TTATTGGTCTTATGGTATATCTCAGTATAGAGGATGATAAGAAAGATTTGTATCTGTTTATTAATTCTCCGGGAGGATGG  
GTAATCCCCGGAATAGCTATTTATGATACTATGCAA---  
TTTGTACAACCGGATGTACAGACAGTATGCATGGGATTAGCCGCTTCAATGGGATCTTTTGTTTTGGCAGGCGGAAAAAT  
TACCAACGTCTAGCATTCCCTCACGCT---AGGGTAATGATCCATCAACCTGCTAGTTCTTTT---  
TATGAGGCACAAACGGGAGAATTTATCCTGGAAGCGGAAGAATCCTGAAACTACGCGAAACTATCACAAGGGTTTATGT  
ACAAAGAACGGGCAAACCTTTATGGCTTGTATCAGAA---  
GACATGGAAAGGGATGTTTTTATGTCAGCAGCAGAAGCCCAAGCCTATGGAATTGTTGATCTTGTAGCGGTTGAA-----  
-----  
-----

-----  
-----  
-----  
-----ATGGAG-----GAATATCAGTTA-----TATTTGGAA-----  
CTGGATAGATCTCGTCAACAGGACTTC-----  
CTATACCCACTTGTTTTTTACGAATATATTTACGGACTCGCTTATAGTCATGATTTA-----AATAGA-----  
-TCA-----ATTTTT-----GTAGAAAAT---TTTGGTTAT-----  
GATAATAAATATAGTTTACTAATTGTAAAACGTTTAATTACTCGAATGTATCAA-----  
CAGAATCATTGATTATTTTCGGCTAATGAT-----TCTAACAAAAATCGATTTTTGAGGTATAAT-----AAGAAT--  
-----TTTTATTCTCAAATAATATCAGAGGGTTTTGCCATCATCGTGGAAATCTGTTTTCTTTACAATTA---  
AGCTCGTCCTTA-----GAGGAG-----GCAGAAATCATAAAATCTTAT---AAAAATCTGCGA--  
-----  
TCAATTCATTCTATTTTTCCCTTTTTTCGAGGATAAAGTTACATATTTAAATTATATATCAGATATACGAGTCCCTTATCC  
TATCCATCTGGAAATCTTAGTCCAAATCCTTCGATACTGGGTGAAAGATGCCCTTTGTTTCATTTATTAAGACTGTTTC  
TTTATGATTATTGTAATTGGAATAGTATT---TTTATT-----CCCCAAAAATCGATTTATACT---TTTTCA---  
-----AAAAAGAAT---  
CCAAGATTTTTCTTCTTCTATATAATTTTTATGTATGTGAATATGAATCTATCTTTTTTTTTTCTACGTACCAAATCTTT  
T---CATTTACGATTAATAATCTTTTAGAGTTTTTTTTTGAGCGAATCTTTTTCTATGCAAAAAAAGGACAT-----  
-----CTTGTAGAA-----GTA-----TTT---GTT---AAGGATTTTTTTTTCTACC-----  
TTAACATTTCTTTAAGGATCCTTTTCATCCATTATGTTAGATATCAGGGAAAATCCATTCTGGCTTCCAAGAATTTGCCTAT  
TTTAATGAATAAATGGAAATACTATTTTATCCATTTATGGCAATGTTATTTTGTATGTTTGGTCTCAACCGCGAACAATCC  
GTATAAACCAATTA-----TCCGAATATTCATTTCACTTTTTGGGCTATTTT-----  
TTAAAGGTGGGGCTGAAGCATTACAGTAGTACGGGGTCAAATGCTGCAAAATGGATTTCTAATCAAAATTATTATAAAAAA  
GCTTGATATAATAGTTCCAATTATTCCAATAATTAGATTATTGGCTAAATCGAAATTTTGTAAATGTATTAGGGAATCCCC  
TTAGTAAGCCGTCCTGGGCCGACTTATCCGATTTTGTAGATTATTGCCCGATTTTTGCGGATATGCAGAAATCTTTCTCAT  
TATTACAATGGA---  
TCCTCAAAAAAAGAGTTTTGTATCGAATAAAAATATACTTTCGGCTTTTCATGTATTAATAACTTTGGCCTGTAAACACAA  
AAGTACCGTA---CGCGCTTTTTTCG-----AAAAGATTAGGTTTCGGAAGAATTATTGGAAGAATCTTTTACAGAG--  
-----GAAGAAGAGATTTCTTTCTTTGATCTTTCCA-----ACAAT---TCTTCTACTTTACGGAGG-----  
TTACAT-----AGAAATCGGATTTGGTATTTGGATATTTCTTTTTAGCAACGATAACGATCTAATCAATCAT-----  
-----  
-----ATGATAATTGAT-----ACAACAGAAGTC---CAA---GAT-----  
ATCAATTCTTTTTCCAGATTGGAATCTTTT-----  
AAAGAGGTCTATGGAGTTCTATGGGTACTCGCCCTATTTTAATTATTGTATTAGGAATCACAATAAGTGTATTAGCAAT  
TGTATGGTTAGAAAGAGAAATATCCGCGGGGATGCAACAACGTATTGGACCTGAATACGCCGGTCTTTTTGGCGTTCTTC  
AAGCTCTAGCAGACGGAACAAAACACTACTTTTCAAAGAGAATCTTATTCCATCTAGAGGGGATATTCGTTTATTCAGTATC  
GGACCATCCATATCAGTTATCTCAATTCTAATAACCTATTTAGTAATTCCTTTTAGCTATAATTTGTTTTATCTGATTT  
GAATATCGGTGTTTTTTTTATGGATTGCTATTTTCGAGTATTGCTCCATTGGACTTCTTATGTCAGGATATGGTTCAAATA  
ATAAATATTCTTTTTTGGGTGGTCTGCGAGCTGCTGCTCAATCAATTAGTTATGAAATACCATTAACTTTA---  
TGTGTATTATCAATATCTCTACTATCGAACAGTTTAAGTACAGTTGATATAGTTGATGCACAATCAAAATATGGGTTTTG  
GGGATGGAATTTGTGGCGTCAACCTATGGGTTTTCGTCGTTTTTCTAATTTCTTCCCTAGCAGAATGTGAAAGATTACCTT  
TTGATTTGCCAGAAGCGGAAGAAGAAATTAGTAGCGGGTATCAAACAGAATATTCGGGTATAAAATTTGGTTTTATTTTAT  
GTTGCTTCTATTTAAACCTGTTAATTTCTTCATTATTTGTAACAGTTCTTTACTTGGGTGGTTTCAATATCTCT---  
ATTCCGTACATATCCCTTTTTGAGTTTTTTGAA-----  
ATAAATAAAGAATATGGAGTTTTTGGAACTACAATTGGTATCTTTATTACACTAGCTAAAACCTTATTTGTTCTTATTCGT  
TTCTATCATAACAAGATGGACTTTGCCTAGGCTAAGAATGGATCAATTATTAATCTTGGCTGGAAGTTCTTTTACCTA  
TTTCTCTTGGTAATCTATTATTAACAACCTTCGTCTCAACTGTTTTCACTCTAA-----  
-----  
ATGATCTGACATGTACAGAATGAAAACCTCATTCTCGATTCTACGAGAATTTTTATGAAAGCCTTTCATTTGCTTCTCTT  
CGATGGAAGTTTTATTTTCCCAGAATGTATCCTAATTTTTGGTCTAATTTCTTCTTCTGATGATCGATTCAACCTCT----  
---  
GATCAAAAAGATATATCTTGGTTCTATTTTATCTCTTCAACAAGTTTAGTAATGAGCATTGTGGTTCTATTGTTCCGATG  
GAGAGAAGAACCTATGATTAGCTTTTCGGGAAATTTCCAAACGAACAATTTCAACGAAATCTTTCAATTTCTTATTTTAC  
TATCTTCAACTCTATGTATTTCTCTATCCGTAGAGTACATTGAATGTACAGAAATGGCTATAACAGAGTTTCTGTTATTC  
GTATTAACAGCTACTCTAGGAGGAATGTTTTTATGCAGCGCTAACGATTTAATAACTATCTTTGTAGCTCCAGAATGTTT  
CAGTTTATGCTCCTATCTACTATCTGGATATACCAAGAAAGATGTACGGTCTAATGAGGCTACTATGAAATATTTACTCA  
TGGGTGGGGCAAGCTCTTCTATTCTGGTTTCATGTTTTCTTGGCTATACGGTTCATCCGGGGGAGAGATCGAGCTTCAA

GAAATAGTGAATGGTCTTATCAATACACAAATGTATAACTCCCCGGGAATTTCAATTGCGCTTATATTCATCACTGTAGG  
AATTGGGTTCAAGCTCTCCCTAGCCCCTTCTCATCAATGGACTCCTGACGTATACGAAGGATCTCCCACTCCAGTCGTTG  
CTTTTCTTTCTGTTACTTTCGAAAGTAGCTGCTTCAGCTTTAGCCACTCGAATTTTCGATATTCCCTTTTATTTCTCATCA  
AACGAATGGCATCTTCTTCTGGAAATCCTAGCTATTCTTAGCATGATATTAGGGAAT

Morus

TTATTGGTCTTATGGTATTTCTCAGTATAGAGGATGATACTAAGGATCTCTATTTGTTTATAAACTCTCCCGGCGGATGG  
GTAATACCTGGATTAGGTATTTATGATACTATGCAA---  
TTTGTGCAACCAGACGTACAAACAATATGCATGGGATTAGCCGCTTCAATGGGATCTTTTATTCTGGTCCGAGGAGAAAT  
TACCAAACGTCTAGCATTCCCTCACGCT---AGGGTAATGATCCATCAACCTGCTAGTTCTTTT---  
TATGAGGCACAGACGGGAGAATTTATCCTGGAAGCGGAAGAACTACTGAAGCTGCGCGAAACCATCACAAGGGTTTATGT  
ACAAAGAACGGGCAAATCCTTATGGGTTATTTCCGAA---  
GACATGGAAAGAGATGTTTTTATGTGAGCAACAGAAGCCCAAGCTCACGGACTTGTTGATCTTGTAGCGGTTGAATAA--  
-----  
-----  
-----  
-----  
-----

-----ATGGCG-----GAATTTCAAGGA-----TATTTAGAA-----

CTAGATAGATCTTGGAAACATGACCTC-----  
CTATACCCACTTATCTTTCCGGGAGTATATTTATGTATTTGCTCATGATCTTGGTTTA-----AATAGA-----  
-TCG-----AATTTG-----TTGGAATAAT---GTAGGTTAT-----  
GACAATAAATCTAGTTTACTAATTGTAACGTTTAAATTTCTCGAATGTATCAA-----  
CAGAATCATTATTTATTATTTCCGCTAACGAT-----TCGAACCAAAATCAACTTTTTGGGTACAAT-----AAGAAT--  
-----TTGTATTCTCAAATGATATCAGAGGGATTTGCAGTCATTGTGGAAATTCATTTTCCCTACGATTA---  
GTATCTTCCTTA-----AAGGGG-----ACAGAAATCGTAAATATTAT-----AATTTACGA--  
-----

TCAATTCATTCAATATTTTCTTTTTTLAGAGGACAAATTTCTCACAGTTAAATTTATGTATCAGATGTATTAATACCCTACCC  
GATTCATCTGGAAATCTTAGTTCAAACCTTTCGCTACTGGGTAAAAGATGCCTCCTCTTTGCATTTATTACGGTTTTTTTC  
TTCACGACTATTATAATTGGAATACTCTT---ATTATT-----CCAAATAAATATATTTCTATT---TTTTCA---  
-----AAAAGTAAT---

CCAAGATTATTCTTGTTCCTATATAATTCTCATGTTTGCGAATACGAATCTATCTTACTCTTTCTACGTAACCAATCTTC  
T---CATTTACGATTAACATCTTCTGGGGTTTTTTTTGAGCGAATATATTTCTATGGAAAAATAAAACAT-----  
-----CCCGTAGAAGAA---GTC-----TTT---GCT---AATGATTCTCCGACTAGC-----

TTATGGTTTCTCGAGGATCTCTTCATGCATTATGTTAGATATCAAGGAAAATCAATTTCTGGCTTCAAAGGATACGCCTCT  
TTTCATGAATAAATGGAAATATTACCTTGTCTTTTTATGGCAATGTCATTTTTTATGTGTGGTCTCAACCAGGAAGGATGT  
ATATAAACCAATTA-----TGCAAACATTCTTCAGCTTTTTGGGCTATCTT-----

TCAAGTATGCAAATAAATCTTTTCAGTAGTACGGAGTCAAATGCTAGAAAATTCGTTTCTAATGGATAATGCTATGAAGAA  
GATTGATACATTAGTTCCAATTAGTCTTCTGATTGGATCGTTGGATAAAAATGAAATTTTGTAAACGTATTAGGACATCCCG  
TTAGTAAGTCGACCTGGGCCGATTTCGTCGGATTTTGATATTATCGACCGATTTGTGTGTATATGCAGAAATCTTTTTTCAT  
TATTACAGTGGAA---

TCCTCAAAAAAAAAAGAGTTTGTATCGAATAAAATATATACTTCGACTTTCTTGTGTTAAAATTTGGCTCGTAAACACAA  
AAGTACTGTA---CGCACTTTTTTG-----AAAAATTAGGTTTCGAAT---TTATTGGAAGAATTCTTTACGGAG-  
-----GAAGAAGAGGTTCTTTCTTTGATTTTTCCA-----AGAACT---TATTCGCTTTGCGGAGG-----  
TCATAT-----AAAGGTCGAATTTGGTATTTGGATATTTTTGCATCAAC-----GATCTTGTCAATCATAAATGA--  
-----

-----ATGATAAGTCAT-----ACACCAGAAGTA---CAA---GAT-----

ATTAATTCTTTTTCTAGATTTCGAATTTTTTA-----  
AAAGAGACCTATGGAATTATATGGGCCTTTATTCTATTTTTACTCCTGTATTGGGAATCACAATAGGTGTACTAGTAAT  
TGTATGGTTAGAAAGAGAAATATCCGCAGGGATACAACAACGATTGGACCTGAATACGCCGGACCTTTGGGAGTTCTTC  
AAGCTTTAGCAGATGGGGCAAAGCTACTTTTTCAAAGAAAATCTTTTTCCATCTAGAGGAGAAACTCGTTTATTTCAGTATC  
GGACCATCCATTGCGGTCATATCCATTTTAGTAAGCTATTCGGTAGTTTCTTTTGGTTCTCACCTTGTTTTAGTGGATCT  
CAATATCGGTGTTTTTTTTATGGATTGCCATTTCAAGTATTGCTCCCATTTGGCCTTCTTATGTCAGGATATGGTTCAAATA  
ATAAATATTCTTTTTTAGGCGGTCTACGAGCTGCTGCTCAATCGATTAGTTATGAAATACCATTAACCTTTA---  
TGTGTGTTATCAATATCTCTATTATCTAATAGTTCAAGTACAGTTGATATAGTTGAGGCGCAATCAAATATGGTTTTTG  
GGGGTGGAAATTTGTGGCGTCAACCTATAGGGTTTTATTATTTTTCTAATTTCTTCCCTAGCAGAATGTGAAAGATTACCT  
TTGATTTACCAGAAGCAGAAGAATAATAGCAGGGTATCAAACCGAATACTCGGGTATCAAATTTGGTTTTATTTTAC



GTTGCTTCCTATCTAAACCTATTAGTTTCTTCATTATTTGTAACAATTCTTTACTTAGGTGGTTGGAATATCTCT---  
ATTCCGTACATATTTGTTTTTGGATTTTTTTGAA-----  
ATAAATAAAACATATGGTGTTTTTGAACCCACAATTGGTATGTTTATTACATTAGCTAAAACCTTATTTGTTCTTGTTCAT  
TCCTATCACAACAAGATGGACTTTACCTAGGCTAAGAATGGACCAGCTATTGAATCTTGGATGGAAATTTCTTTTACCTA  
TTTCTCTCGGTAATCTATTATTAACAACCTTCTTCCCAACTCTTTTCACTGTAA-----  
-----

ATGATCTGGCATGTACAGAATGAAAACCTTCATTCTCGATTCTACGAGAATTTTTATGAAAGCCTTTCATTTGCTTCTCT  
CGATGGAAGTTTTATTTTCCCAGAATGTATCCTAATTTTTGGCCTAATCTTCTTCTGATGATCGATTCAACCTCT----  
--

GATCAAAAAGATATACCTTGGTTATATTTTCATCTCTTCAACAAGTTTAGTAATGAGCATAACGGCCCTATTGTTCCGATG  
GAGAGAAGAACCTATGATTAGCTTTTTCGGGAAATTTCCAACGAACAATTTCAACGAAATCTTTCAATTTCTTATTTTAC  
TATGTTCAACTTTTATGTATTCCTCTATCCGTAGAGTACATTGAATGTACAGAAATGGCTATAACGGAGTTTCTGTTATTC  
GTATTAACAGCTACTCTAGGAGGAATGTTTTTATGCGGTGCTAACGATTTAATAACTATTTTTGTAGCTCCAGAATGTTT  
CAGTTTATGCTCCTACCTATTATCTGGATATACCAAGAAAGATGTACGGTCTAATGAGGCTACTACGAAATATTTACTCA  
TGGGTGGGGCAAGCTCTTCTATTCTGGTTCATGGTTTTCTTGGCTCTATGGTTCATCCGGGGGAGAGATCGAGCTTCAA  
GAAATAGTGAATGGTCTTATCAATACACAAATGTATAACTCCCCAGGAATTTCAATTGCGCTGATATTCATCACTGTAGG  
AATTGGGTTCAAGCTTTCCCCAGCCCTTCTCATCAATGGACTCCTGACGTATACGAAGGATCTCCCACTCCAGTTGTTG  
CTTTTCTTTCTGTTACTTTCGAAAGTAGCTGCTTCAGCTTCAGCCACTCGAATTTTCGATATTCCTTTTTATTTCTCATCA  
AACGAATGGCATCTTCTTCTGGAAATCCTAGCTATTCTTAGCATGATATTGGGGAAT

Nandina

TTATTGGTCTCATGGTATATCTAAGTATAGAGGATGAGACCAAGGATCTTTATTTATTTATAAACTCGCCCGGTGGATGG  
GTAATACCCGGAGTAGCTATTTATGATACTATGCAA---  
TTTGTACCACCAGACGTACATACAATATGCATGGGATTAGCCGCTTCAATGGGATCTTTTATTCTGGTCCGAGGAGAAAT  
TACCAAACGTTTAGCATTCCCTCACGCC---AGGGTAATGATCCACCAACCTGCTAGTTCTTTT---  
TATGAGGCACAAACAGGAGAATTTGTCTTAGAAGCGGAAGAAGTCTGAAACTCCGCGAAACCCCTCACAAGGGTTTATGT  
ACAAAGAACAGGCAACCCCTTATGGGTTGTATCCGAA---  
GACATGGAAGGGATGTTTTTATGTACAGCAACAGAAGCCCAAGCTCATGGAATTTGTTGATCTTGTAGCAGTCGAAAATAC  
CGGGGATCTCGTG-----ATG---AAAGAA-----CAAAAA-----  
-----TGGATTCAT---GAAGGTTAATTACTGAATCA---CTTCCCAACGGT-----  
ATGTTTTCGAGTTTCGTTTATGATAACGAAGATCTGATTCTAGGTTATGTTTTCAGGAAGG-----  
ATACGACGTAGTTTTATACGAATACTACCCGGT-----  
GATAGAGTAAAAATTGAAGTAAGTCGTTATGATTCAACCAGGGGACGCATAATTTATAGACTCCGC-----  
-----AACAAAGATTTCGAATGATTAG-----  
-----

-----ATGGAA-----GAATTAAGGA-----TATTTAGAA-----

ATAGATAGATCTCGACAACAAGACTTC-----  
CTATATCCACTTCTATTTTTCAGGAGTATATTTATGCACTTGCTCATGATCATGGTTTA-----AATGGA-----  
-TCG-----ATTCTTTATGAACCTATCGAAAAT---  
TTAGGTTATGTAGGTTATGACAAAAATCCAGTTCACTAGTTGTGAAACGTTTAAATTACTCGAATGTATCAA-----  
CAGAAGCATTGGTTTTTTTTGATAATGAT-----CCTAACCAAAAATAAATTTGTTGATCATAAG-----AAGAAT---  
-----TTTTATTCTCAAATGATATCAGAGGGTTTTGCAGTCATTGTGGAATTTCCATTTTCACTGCGATTA---  
GTATCTTCCCTG-----GAAGGC-----AAAGATATAACAAAATCTCAT-----AATTTACGC---  
-----

TCAATTCATTCAACATTTCCCTTTTTAGAGGATCAATTTTACATTTAAATCATGTATTAGATATACTAATACCCTATCC  
TATTCATCTGGAACCTCTGATTCAACTCCTTCGCTGTTGGATACAAGATGCCCCCTCTTTCGATTTATTGCGAGTCCTTC  
TCTACGAGTATCAGAATTGGAATAGTCTT---ATTACT-----AAAAAAAAAAAAAACTTTTCCGTT---TTTTCA---  
-----AATGAGAAT---  
CAAAGATTATTCTTGTTCCTATATAATTTTTATGTATATGAATGTGAATCCATATTCTGTTTTTCTCCGTAACAATCTGT  
T---CATTTACGATCAACGCTCTTCTAGAGCCTTTCTTGGAGCAACACATTTTTATAGAAAAATAGAAAAT-----  
-----TTTATAGTA-----GTT-----TTT---CGT---AATGTTTTTTCAGACCAAC-----  
CTATGGTTGTTCAAGGATCCTTTTCATGCATTATGTACGATATCAAGGAAAATCCATTCTGGCTTCAAAGGGAACCTCCTCT  
TCTGATGAATAAATGGAAGTATTACCTTGTAATTTCTGGCAATGTCATTTTTACTTGTGGTCTCAACCAGATAGGATTC  
ATATAACCAATTA-----TCCAACCATTCCCTCGATTTTTTGGGCCATCTT-----  
TCAAGTGTACGACTAAAGACTTCTGTGGTACGGAGTCAAACGTTAGACAATTCCTTTATTATAGATATTGCTATTAATAAA  
ATTTGATACTATAGTCCCAATAATTCCTTTGATTGGATCATTGGCTAAAGCGAAATTTTGTAACTATCAGGGCATCCCA  
TTAGTAAGCCGGCTTGGACTGATTTCATCGGATTCTGATATTATTGATAGATTTGGGCGGATATGCAGAAATCTTTCTCAT  
TATTATAGTGA---

TCCTCAAAAAAAAAATAGTTTGTATCGAGTAAAATATATCCTTCGACTTTTCGTGTGCTAGAACTTTGTCTCGTAAACACAA  
AAGTACTGTA---CGTTCTTTTTTTG-----AAAAGATTAGGTTTCGAAA---TTATTGGAAGAATTCCTTACAGAG-  
-----GAAGAACAAGTTCTTTCTTTGATCTTCCCA-----AGAGTA---TCTTCTTCTTCGCGGAGG-----  
TTAGAT-----AAAGAACGGATTTGGTATTTGGATATTATTTCGTATCAAT-----GACCTGGCCAATCATTTCATGA--  
-----  
-----ATGATAATTGAT-----ACGACAAAAGTA---CAACAAGCT-----  
ATCAATTCTTTTTCCAGATCGGAATCCTTA-----  
AAAGAGGTTTATGGGCTCATATGGTTGCTTGTTCCTATTTTTACTCCTTTATTGGGAATCATAATAGGGGTACTAGTAAT  
TGTGTGGTTAGAAAAGACAAATATCCGCAGGGGTACAACAACGTATTGGACCTGAATACGCCGGCCCTTTGGGAATTCCTC  
AAGCTCTAGCAGATGGGACCAAACCTGCTTTTCAAAGAGGATCTTCTCCCCTAGAGGTGATATTCTTTTATTTCAGTCTC  
GGACCATCTATAGCGGTCATATCAATTTTACTAAGTTATTTCAGTAATTCCTTTTGGCTATCACCTTGTTTTAGCCGATCT  
CAGTATAGGCGTTTTTTTTATGGATTGCTATTTTCAAGTATTGCTCCTATTGGACTTCTTATGTCAGGATATGGATCGAATA  
ATAAGTATTCCTTTTTTAGGTGGTCTACGAGCTGCCGCTCAATCAATTAGTTATGAAATACCATTAACCTCA---  
TGTGTGTTATCAATTTCTCTACTATCTAACAGTTCAAGTACAGTTGATATAGTTGAGGCGCAGTCAAAAATATGGTTTTTG  
GGGGTGAATCTGTGGCGTCAACCTATAGGGTTTATGGTTTTTCTAATTTCTTCCCTAGCAGAATGTGAGAGATTGCCCT  
TTGATTTACCAGAAGCAGAGGAAGAATTGGTTGCGGGTTATCAAACCGAATATTTCAGGTATAAAAATTTGGTTTTATTTTAC  
GTTGCTTCTCTATCTAACCTACTAGTTTCTTCAATTATTTGTAACCGTTCTTTACTTGGGCGGTTGGAATCTCTCT---  
ATTCCGTACATATTCAATTTTCAATCCTGAGCTTTTTCAGA-----  
ATTAATGAAGTTTGTGGAATCTTTGGAATGACAATTGGTATATTTATTACATTAGCTAAAGCTTATTTGTTCTGTTTCAT  
TTCTATCACAACAAGATGGACTTTACCTAGGATGAGAATGGACCAACTGTTGAATCTTGGGTGGAATTTCTTTTACCTA  
TTTCATTAGGTAATCTATTATTGACAACCTTCTTTCCAACCTCCTTTCACTGTAA-----  
-----  
ATGATCTGGCATGTACAGAATGAAAACCTTCATTCTCGATTCTACGAGAATTTTTATGAAAGCGTTTCATTTGCTTCTCTT  
CCATGGAAGTTTTATTTTCCCAGAATGTATCCTAATTTTTGGCCTAATTCCTTCTTCTGATGATCGATTCAACCTCT----  
--  
GATCAAAAAGATATACCTTGGTTATATTTTCATCTCTTCAACAAGTTTAGTAATGAGCATAGCGGCCCTATTGTTCCGATG  
GAGAGAAGAACCTATGATTAGCTTTTCGGGAAATTTCCAAACGAACAATTTCAACGAAATCTTTCAATTTCTTATTTTAC  
TATGTTCAACTCTATGTATTCTCTATCCGTAGAGTACATTGAATGTACAGAAATGGCTATAACAGAGTTTCTGTTATTC  
GTATTAACAGCTACTCTAGGAGGAATGTTTTTGTGTGGTGTCAACGATTTAATAACTATCTTTGTAGCTCCAGAATGTTT  
CAGTTTATGCTCCTACCTATTATCTGGATATACCAAGAGAGATGTACGGTCTAATGAGGCTACTACGAAATATTTACTCA  
TGGGTGGGGCAAGCTCTTCTATTCTGGTTTCATGGTTTTCTTGGCTATATGGTTCATCCGGGGGAGAGATCGAGCTTCAA  
GAAATAGTGAATGGTCTTATCAATACACAAATGTATAACTCCCCAGGAATTTCAATTGCGCTTATATTCATCACTGTAGG  
AATTGGGTTCAAGCTTTCCCCAGCCCTTCTCATCAATGGACTCCTGACGTATACGAAGGATCTCCCCTCCAGTCGTTG  
CTTTTCTTTCTGTTACTTTCGAAAGTAGCTGCTTCAGCTTTAGCCACTCGAATTTTCGATATTCCTTTTTATTTCTCATCA  
AACGAATGGCATCTTCTTCTGGAAATCCTAGCTATTCTTAGCATGATATTGGGGAAT  
Nicotiana  
TTATTGGTCTTATGGTATATCTCAGTATCGAGGATGAGACCAAAGATCTGTATTTGTTTATAAACTCTCCTGGGGGCTGG  
GTAATACCTGGGGTGGCTATTTATGATACTATGCAA---  
TTTGTGCGACCAGATGTCCATACAATATGCATGGGATTAGCCGCTTCAATGGGATCTTTTATCCTGGTTCGGAGGAGAAAT  
TACCAAACGTCTAGCATTCCCTCACGCT---AGGGTAATGATCCATCAACCTGCTAGTTCTTTT---  
TATGAGGCACAAACAGGCGAATTTGTCTGGAAGCGGAAGAAGTCTGAAACTGCGTGAAACCCCTCACAAGGGTTTATGT  
ACAAAGAACGGGAAACCCCTTATGGGTTGTATCCGAA---  
GATATGGAAAGAGATGTTTTTATGTCAGCAACAGAAGCCCAAGCTTATGGAATTGTTGATCTTGTAGCGGTTGAA-----  
-----  
-----ATGGAA-----GAAATCCAAAGA-----TATTTACAG-----  
CCAGATAGATCGCAACAACACAACCTTC-----  
CTATATCCACTTATCTTTTCCAGGAGTATATTTATGCACTTGCTCATGATCATGGTTTA-----AATAGA---AATAGG--  
-TCG-----ATTTTG-----TTGGAAAAT---CCAGGTTAT-----  
AACAAATAAATTAAGTTTCTAATTTGTGAAACGTTTAAATTACTCGAATGTATCAA-----  
CAGAATCATTTTCTTATTTCTACTAATGAT-----TCTAACAAAAATTCATTTTTGGGGTGC AAC-----AAGAGT--  
-----TTGTAATCTCAAATGATATCAGAGGGATTTGCGTTTTATTGTGGAATTTCCGTTTTCTCTACGATTA---  
ATATCTTCTTTATCTTCTTTCGAAGGC-----AAAAAGATTTTTAAATCTTAT-----AATTTACGA--

-----  
TCAATTCATTCAACATTTTCCTTTTTTAGAGGACAATTTTTTACATCTAAATTATGTATTAGATATACTAATACCCTACCC  
TGTTTCATCTGGAAATCTTGGTTCAAACCTCTTCGCTATTGGGTAAAAGATGCCTCTTCTTTACATTTATTACGATTCTTTC  
TCCATGAATTTTGGAAATTTGAATAGTCTT---ATTACT-----TCAAAGAAGCCCCGGTTACTCC---TTTTCA---  
-----AAAAAAAT---  
CAAAGATTCTTCTTCTTCTTATATAATTCTTATGTATATGAATGCGAATCCACTTTTCGTCTTTCTACGGAACCAATCTTC  
T---CATTTACGATCAACATCTTTTGGAGCCCTTCTTGAACGAATATATTTCTATGGAAAAATAGAACGT-----  
-----CTTGTAGAA-----GTC-----TTT---GCT---AAGGATTTTCAGGTTACC-----  
CTATGGTTATTCAAGGATCCTTTTCATGCATTATGTTAGGTATCAAGGAAAATCCATTCTGGCTTCAAAGGGGACGTTTCT  
TTTGATGAATAAAATGGAAATTTTACCTTGTCAATTTTTGGCAATGTCATTGTTCTCTGTGCTTTCACACAGGAAGGATCC  
ATATAAACCAATTA-----TCCAATCATTCCCCTGACTTTATGGGCTATCTT-----  
TCAAGTGTGCGACTAAATCCTTCAATGGTACGTAGTCAAATGTTAGAAAATTCATTTCTAATCAATAATGCAATTAAGAA  
GTTTCGATACCCTTGGTTCCAATTATTCTTTTGGATTGGATCATTAGCTAAAGCAAACCTTTTGTACCGTATTAGGGCATCCCA  
TTAGTAAACCGGTTTGGTCCGATTTATCAGATTCTGATATTATTGACCGATTGGGCGTATATGCAGAAATCTTTTTTCAT  
TATTATAGCGGA---  
TCTTCCAAAAAAGACTTTTATATCGAATAAAGTATATACTTCGACTTTCTTGTGCTAGAACTTTAGCTCGGAAACACAA  
AAGTACTGTA---CGCACTTTTTTG-----AAAAGATCGGGCTCGGAA---TTATTGGAAGAATTCTTAACGTG-  
-----GAAGAACAAGTTCTTTCTTTGACCTTCCCA-----CGAGCT---TCTTCTAGTTTGTGGGGA-----  
GTATAT-----AGAAGTCGGATTTGGTATTTGGATATTTTTTGTATCAAT-----GATCTGGCGAATTAT-----  
-----

-----ATGATAATTGAT-----ACAACAGAAATA---GAA---ACT-----  
ATCAATTCCTTTTTCCAAATTGGAATCCTTA-----  
AAAGAAGTCTATGGGATCATATGGATGCTTTTCCCTATTTTGACTCTTGTATTAGGAATCACAATAGGTGTACTAGTAAT  
TGTTTTGGTTAGAAAGAGAAATATCTGCAGGAATACAACAACGTATCGGACCTGAATATGCTGGCCCTTTAGGAATTCTTC  
AAGCTCTAGCAGATGGGACAAAACCTACTTTTGAAAGAGAACCTTATTCCATCTACAGGAGATACTCGTTTATTTCAGTATC  
GGACCATCCATAGCAGTAATATCCATCTTTCTAAGTTATTTCAGTAATTCCTTTTGGTGTACACCTTGTCTAGCCGATCT  
TAGTATTGGTGTTTTTTCTGGATTGCCATTTCAAGTATTGCTCCCCTGGACTTCTTATGTGCGGGATATGGATCAAATA  
ATAAATATTCTTTTTTAGGTGGTCTACGGGCGAGTGTCAATCAATTAGTTATGAAATACCATTAGCTCTA---  
TGTGTGTTATCAATATCTACTACTAACAAGTTAAGTACAGTTGATATAGTGAAGCGCAGTCAAATATGGCTTTTTG  
GGGTTGGAATTTGTGGCGTCAACCCATCGGGTTTATCGTTTTTCTAATTTCTTCTCTAGCCGAGTGTGAAAGATTACCTT  
TTGATTTACCAGAAGCAGAAGAAGAAATTAGTAGCAGGGTATCAAACCGAATATTTCAGGTATCAAATTTGGTTTTATTTTAC  
ATTGCTTCATATCTGAATCTACTAGTTTCTTCAATTATTTGTAACAGTTCTTTATTTGGGAGGTTGGAATCTTTCT---  
ATTCCGTACATATTTGTTTCTGAGCTATTTGGC-----  
ATAAATAAAAGGGGTAAAGTCTTTGGAACACTAATTGGTATCTTTATCACATTAGCCAAAACCTTATTTGTTTTTGTTCAT  
TCCTATTGCAACAAGATGGACTTTACCGAGGCTGAGAATGGACCAACTATTAATCTTGGGTGGAAATTTCTTTTACCTA  
TTTCTCTAGGTAATCTATTATTGACAACCTCGTCCCAACTTCTTTCACTGTAA-----  
-----

ATGATCTGGCATGTACAGAATGAAAACCTTCATTCTCGATTCTACGAGAATTTTTATGAAAGCCTTTTCATTTGCTTCTCTT  
CGATGGAAGTTTGATTTTCCCAGAATGTATCCTAATTTTTGGCCTAATCTTCTTCTGATGATCGATTCAACCTCT----  
--

GATCAAAAAGATATACCTTGGTTATATTTTCATCTCTTCAACAAGTTTAGTAATGAGCATAACGGCCCTATTGTTCCGATG  
GAGAGAAGAACCTATGATTAGCTTTTTCGGGAAATTTCCAAACGAACAATTTCAACGAAATCTTTCAATTTCTTATTTTAC  
TATGTTCAACTCTATGTATTCCTCTATCCGTAGAGTACATTGAATGTACAGAAATGGCTATAACAGAGTTTCTCTTATTC  
GTATTAACAGCTACTCTAGGGGGAATGTTTTTATGCGGTGCTAACGATTTAATAACTATCTTTGTAGCCCCAGAATGTTT  
CAGTTTATGCTCCTACCTATTATCTGGATATACCAAGAAAGATGTACGGTCTAATGAGGCTACTATGAAATATTTACTCA  
TGGGTGGGGCAAGCTCTTCTATTCTGGTTTCATGGTTTCTTCTTGGCTATATGGTTTCATCCGGGGGAGAGATTGAGCTTCAA  
GAAATAGTAAACGGTCTTATCAATACACAAATGTATAACTCCCCAGGAATTTCAATTGCGCTCATATTCATTACCGTAGG  
AATTGGGTTCAAGCTTTCCCCAGCCCTTCTCATCAATGGACTCCTGACGTATACGAAGGATCTCCCACTCCAGTCGTTG  
CTTTTCTTTCTGTTACTTTCGAAAGTAGCTGCTTCAGCTTCAGCCACTCGAATTTTCGATATTCCTTTTTATTTCTCATCA  
AACGAATGGCATCTTCTTCTGGAATCCTAGCTATTCTTAGCATGATATTGGGAAAT

Nuphar

TTGTTGGTCTCATGGTATATCTCAGTATGGAAGATAATACCAGGGATCTCTATTTGTTTTATAAATTCTCCCGGCGGATGG  
GTAATACCGGAATAGCTATTTATGATGCTATGCAA---  
ATTGTTCCACCAGACGTACATAACAATATGCATGGGATTAGCTGCTTCGATGGGATCTTTTCATCCTGGTCCGAGGAGAATT  
TACCAAACGTCTAGCATTCCCTCACGCTCGGAGGGTTATGATCCACCAACCTGCTAGTTCTTTT---  
TATGAGGCACAAGCAGGAGAATTTATCCTGGAAGCAGAAGAACTGTTGAAACTTCGCGAAATACTCACAAGAGTTTATGT  
ACAAAGAACGGGCAAACCTTTATGGGTTGTATCTGAA---

GACATGGAAAGGGATGTTTTTATGTCAGCAACAGAAGCCCAAGCTCATGGCATTGTTGATCTTGTAGCGGTCGAA-----  
-----ATG---AAAGAA-----CAAAAA-----  
-----TTGATCCAT---GAAGGTTTAAATTACTGAATCA---CTTCCCAATGGC-----  
ATGTTCTGGGTTTCGCTTAGATAACGAAGACCTGGTTCTAGGTTATGTTTCAGGGCGG-----  
ATACGACGTAGTTTTATACGAATACTACCAGGA-----  
GATAGGGTTAAAATTGAAGTCAGCCGTTATGATTCAACAAGGGGACGTATAATTTATAGACTTCGC-----  
-----AATAAAGATTCAAACGATTAG-----  
-----ATGGAGAAATTGCAATACGAATTGCAAGGC-----TATTTAGAA-----  
ATAGATAGATACCGGAAACAGCGCTTC-----  
CTATATCCACTTCTTTTTCGGGAGTATATCTATGCCTTGTCTCATGATCATGGTTTA-----AATAGT-----  
-TCG-----ATTTTTTATGAACCCACGGAAAAT---TTAGGTTAT---  
GACAATGACAATAAATCTAGTTCACTAATTGTGAAACGCTTAATTACTCGACTGCATCAA-----  
CAGAATCATTAAATCATTTCGGTTAATGAT-----TCT-----AGGTTTCGTCGGGCCAAC-----AGGAGT--  
-----TTTTATTCTCAAACGATATCAGAGGGTTTTGCAGGAATTATGGAAATTCATTCTCGATGCGATTA---  
GTACCTTCCCTA-----GAAAGA-----ATAGCAAAATATCAG-----AATTTACGA-----  
-----  
TCTATTCAATCAATATTTCCCTTTTTAGAGGACAAATTATCACATTTATATTATGTGTCAGATATACTAATACCCACCC  
AATCCATCTGGAAATCTTGCTTCAAACCTCTTCGCACCCGGATACGAGATGCTCCTTCTTTGCATTTATTGAGATGCTTTC  
TACACGAGCATCATAATTGGAATAGCCTT---ATTACT-----CCAAAGAAATCCACTTCAATT---TTTTCA---  
-----AAGGAAAAT---  
CAAAGATTATTCTTGTCTTGTATAATTCTCATGTATATGAATGCGAATCCGTATTAGTTTTCTTTCGTAAACAATCCTC  
T---CATTTACGGTCAATATCTTCTCTAGCCTTTCTTGAGAGAACACATTTCTATGGAAAAATAAAACAT-----  
-----CTTGTAGTG-----GCA-----CCT---CGT---  
AATGATTCTCAAAGGACCCTGCCCTCTGGTTCTTCAAGGAACCCTTGATGCATTATGTTAGGTATCAAGGAAAATCAAT  
TATGGCTTCAAGGTGTACTAATTTACTGATGAAGAAATGGAAATATTACCTTGTTAATTTCTGGCAATGTCATTTTCACT  
TATGGTCTCAACCGGGTGGGATCCATATAAATGAATTA-----TCCAATCATTCTTTCTATTTTCTGGGCTATCTT---  
---  
TCAGGTGTACGACTAATGCCTTGGGTGATAAAGGAGTCAAATGCTAGAGAATTCATTTATGATCGATACTGCTATTAAGAG  
ATTCGATACAATAGTCCCAATTTTTCTCTGATTGGATCGTTGGTTAAAGCGAAATTCGTGAACGTATCAGGGTATCCTA  
TTAGTAAATCAGTCTGGGCCGATTCTGTCGGATTCTGATATTATTGCTCGATTCTGGGTGGATATGCAGAAATCTCTCTCAT  
TATCACAGCGGA---  
TCCTCAAAAAAACACAGTTTGTGTCGAATAAAGTATATACTTCGACTTTTCGTGTGCTAGAACTCTAGCTCGTAAACATAA  
AAGTACGGTA---CGCGTAATCTGT-----AAGAGATTAGGTTTCGAAA---CTATTGGAAGAGTTCCTTACAGAG-  
-----GAACAAGAAATTGTTTCTTTTCTCTCCGA-----GGAACC-----CGTTTACGTAGT-----  
-----GAACGGATTGGTATTTGGATATTATCCGTATCAAC-----GGTCTGGTCCCCCAT-----  
-----ATGATAATTGAA-----GAAGCA---CAA---GCT-----  
ATCAATTCTTTTTTTCAGATCGGAATCCTCA-----  
AAGGAGGTCTATGGGCTCATATGGTTACTTGTACCTATTTTACTCTTGTATTGGGAATCACAATAGGGGTATTAGTAAT  
TGTGTGGCTAGAAAGAAAAATATCTGCAGGGATACAACGACGAATTGGTCCTGAGTATGCCGGTCCCTTGGGGATTCTTC  
AAGCTCTAGCGGATGGGGTCAAACACTACTTTTTCAAAGAAGATCTTCTTCCATCTAGAGGAGATATTCGTTTATTTAGTGTC  
GGCCCATCTATAGCGGTCGTATCAATTCTACTGAGTTATTAGTAATTCCTTTTGGCCATCACCTTGTTCCTAACCGATCT  
CAGTATAGGTGTTTCTCTATGGATCGCTATTTCAAGTATTGCCCCATCGGACTTCTTATGTCCGGATATGGATCAAATA  
ATAAATATTCCTTTTTCAGGTGGTTTACGAGCTGCTGCTCAATCTATTAGTTATGAAATACCATTAACCTCA---  
TGCGTGTATCCATATCTCTACTATCTAACAGTTCAAGTACGGTTGATATAGTTGAGGCGCAGTCAAAAATATGGTTTTTG  
GGGGTGAATCTTTGGCGTCAACCTATAGGGTTTATAGTTTTTATAAATTTCTTCACTAGCAGAATGTGAGAGATTGCCCT  
TTGATTTACCGGAAGCCGAGGAGGAATTAGTAGCAGGTTATCAAACCTGAATATTTCAGGTATAAAAATTTGGTTTTATTTAT  
GTTGCTTCTTACCTAAATCTACTAGTTTCTTCAATTATTCGTAACAATTCTGTACTTGGGCGGGTGAATCTTTCT---  
ATTCCATATATACCAATTACTGAACTTTTTCGAA-----  
AAAAATCAAACCTAGTGAAGTCTTTGGAACAACAATTAGTCTCCTCATTACATTAGCTAAAGCTTATTTGTTCTCTGTTTCT  
TCCTATCTCAACAAGATGGACTTTACCTAGGATGAGAATGGACCAACTATTAATCTTGGGTGGAAATCTCTTTTACCTA  
TTGCTCTCGGTAATCTATTATTGACAACCTTCTTCCCAACTCGTTTTCGCTGTAA-----  
-----  
ATGATCTGGCATGTCCAGAATGAAAACCTTCAATCTCGATTCTACGAGAATTTTTATGAAAGCGTTTCATTTGCTTCTCTT  
CAATGGAAGTTTTATTTTCCAGAATGTATCCTAATTTTTGGCCTAATTTCTTCTTCTGATGATCGATTCAACCTCT----

GATCAAAAAGATACACCTTGGTTATATTTTCATCTCTTCCACAAGTTTAGTAATGAGCATAACCGCCCTATTGTTCCGATG  
GAGAGAAGAACCTATGATTAGCTTTTCGGGAAATTTCCAAACGAACAATTTCAACGAAATCTTTCAATTCCTTATTTTAC  
TATGTTCAACTCTATGTATTCCTCTATCCGTAGAGTACATTGAATGTACAGAAATGGCTATAACAGAGTTTCTGTTATTT  
GTATTAACAGCTACTCTAGGAGGAATGTTTTATGTGGTGCTAACGATTTAATAACTATCTTTGTAGCTCCAGAATGTTT  
CAGTTTATGCTCCTACCTATTATCTGGATATACCAAGAGAGATGTACGGTCTAATGAGGCTACTACGAAATATTTACTCA  
TGGGTGGGGCAAGCTCTTCTATTCTGGTTTTATGGTTTTCTTGGCTATATGGTTTCATCCGGGGGAGAGATCGAGCTTCAA  
GAAATAGTGAACGGTCTTATCAATACACAAATGTATAACTCCCCAGGAATTTTCGATTGCGCTTATATCCATCACTGTAGG  
AATTGGGTTCAGCTTTCCCCAGCCCCTTTTCATCAATGGACTCCTGACGTATACGAAGGATCTCCCCTCCAGTCGTTG  
CTTTTCTTTCTGTTACTTCGAAAGTAGCTGCTTCAGCTTCAGCCACTCGAATTTTCGATATTCCTTTCTATTTCTCATCG  
AACGAATGGCATCTTCTTCTGGAAATCCTAGCTATTCTTAGCATGATATTGGGGAAT

Nymphaea

TTGTTGGTCTCATGGTATATCTCAGTATGGAAGATAATACCAGGGATCTCTATTTGTTTATAAATTCTCCCGCGGATGG  
GTAATACCGGGAATAGCTATTTATGATGCTATGCAA---  
ATTGTTCCACCAGACGTACATACAATATGCATGGGATTAGCCGCTTCGATGGGATCTTTCATCCTGGTCGGAGGAGAATT  
TACCAAACGTCTAGCATTCCCTCACGCT---AGGGTTATGATCCACCAACCTGCTAGTTCTTTT---  
TATGAGGCACAAGCAGGAGAATTTATCCTGGAAGCGGAAGAAGTGTGAAACTTCGCGAAATACTAACAAGAGTTTATGT  
ACAAAGAACGGGCAAACCTTTATGGGTTGTATCTGAA---  
GACATGGAAGGGATGTTTTTATGTCAGCAACAGAAGCCCAAGCTCATGGCATTGTTGATCTTGTAGCAGTCGAAAATAG  
CGCGGATTTTGTG-----ATG---AAAGAA-----CAAAA-----  
-----TTGATCCAT---GAAGTTTTAATTACTGAATCA---CTTCCCAATGGC-----  
ATGTTCTGGGTTTCGCTTAGATAACGAAGACCTGGTTCTAGGTTATGTTTCAGGGCGG-----  
ATACGACGTAGTTTTATACGAATACTACCAGGA-----  
GATAGAGTCAAAATAGAAGTCAGCCGTTATGATTCAACAAGGGGACGTATAATTTATAGACTTCGC-----  
-----ATAAAGATTCAAACGATTAG-----

ATGCGGTTCAAGTTTCATTGCAAACAAATGGAAAAATGCAATACGAATTGCAAGGC-----TATTTAGAA-----  
ATAGATAGATACCGGAAACAGCGCTTC-----  
TTATATCCACTTCTTTTTCGGGAGTATATCTATGCACCTTGCTCATGATCATGGTTTA-----AATAGT-----  
-TCG-----ATTTTTATGAACCCACGGAAAAT---TTAGGTTAT---  
GACAATGACAATAAATCTAGTTCACTAATTGTGAAACGCTTAATTACTCGACTGCATCAA-----  
CAGAATCATTGACCATTTTCGGTTAATGAT-----TCT-----AGGTTTCGTTGGGCCCAAC-----AGGAGT---  
-----TTTTATTCTCAAACGATACCAGAGGGTTTTGCAGGAATTATGGAAATTCATTCTCGGTGCGATTA---  
GTATCTTCTTA-----GAAAGA-----GAAAGAATAGCAAAATATCAT-----AATTTACGA---  
-----

TCTATTCATTCAATATTTCCCTTTTTAGAGGACAAATTATCACATTTATATTATGTTTCAGATATACTAATACCCTACCC  
AATCCATCTGGAAATCTTGCTTCAAACCTCTTCGCACTCGGATACGAGATGCTCCTTCTTTGCATTTATTGAGATGTTTTCT  
TACACGAGCATCATAATTGGAATAGCCTT---ATTACT-----TCAAATAAATCCATTTCCATT---TTTTCA---  
-----AAGGAAAAT---

CAAAGATTATTCTTGTCTTGTATAATTCTCATGTATATGAATGCGAATCCGTATTAGTTTTCTTTCGTAAACAATCCTC  
T---CATTTACGGTCAATATCTTCTCTAGCCTTTCTTGAGAGAACACATTTTTATGGAAAAATAAAACAT-----  
-----CTTGTAGTG-----ACG-----CCT---CGT---  
AATGATTCTCAAAGGACCCTGCCCTCTGGTTCTTCAAGGAACCTTTGATGCATTATGTTAGGTATCAAGGAAAATCAAT  
TATGGCTTCAAGGTGACTAATTTACTGATGAAGAAATGGAAATATTACCTTGTCATTTCTGGCAATGTCATTTTCACT  
TATGGTCTCAACCGGGTAGGATCCATATAAATGAATTA-----TCCAATCATTCTTTCTATTTTCTGGGCTATCTT---  
---

TCAGGTGTACGACTAACGCCTTGGGTGATAAGGAGTCAAATGCTAGAGAATTCATTTATGATCGATACTGCTATTAAGAG  
ATTCGATACAATAGTCCCAATTTTTCTCTGATTGGATCGTTGGTTAAAGCTAAATTCGTAAACGTATCAGGGTATCCTA  
TTAGTAAGTCAGTCTGGGCCGATTTCGTCGGATTCTGATATTATTGCTCGATTTCGGGTGGATATGCAGAAATCTCTCTCAT  
TATCACAGCGGA---  
TCCTCAAAAAAACACAGTTTGTGTGCAATAAAGTATATACTTCGACTTTCGTGTGCTAGAACTCTAGCTCGTAAACATAA  
AAGTACGGTA---CGCGCAATCTGT-----AAGAGATTAGGTTCAAAA---CTATTGGAAGAGTTCCTTACAGAG-  
-----GAACACGAAATGTTTTCTTTTCATCTTCCGA-----AGAACC-----CGTTTACGTAGT-----  
-----GAACGGATTTGGTATTTGGATATTATCCGTATCCAT-----GGTCTGGTCCCCCATTCA-----  
-----

-----ATGATAATTGAA-----GAAGCA---CAA---GCT-----  
ATCAATTCCTTTTTTTCAGATCGGAATCCTCA-----  
AAAGAGGTCTATGGGCTCATATGGTTACTTGTACCTATTTTACTCTTGTATTGGGAATCACAATAGGGGTATTAGTAAT

TGTGTGGCTAGAAAAGAAAAATATCCGCAGGGATAACAACGACGAATTGGTCTGAGTATGCCGGGCCCTTGGGCATTCTTC  
AAGCTCTAGCGGATGGGGTCAAACACTACTTTTTCAAAGAAGATCTTCTTCCATCTAGAGGAGATATTCGTTTATTTAGTGTC  
GGCCCATCCGTAGCGGTTCGTATCAATTCTACTGAGTTATTAGTAATTCCTTTGGCTATCACCTTGTACTAACCGATCT  
CAGTATAGGTGTTTTTCTATGGATCGCTATTTCAAGTATTGCCCTATCGGACTTCTTATGTCCGGATATGGATCAAATA  
ATAAATATTCCTTTTTAGGTGGTTTACGAGCTGCTGCTCAATCTATAAGTTATGAAATACCGTTAACTCCA---  
TGTGTGTTATCAATATCTCTACTATCTAACAGTTCAAGTACGGTTGATATAGTTGAGGCGCAGTCAAAATATGGTTTTTG  
GGGGTGAATCTTTGGCGTCAACCTATAGGGTTCTAGTTTTTATAATTTCTTCACTAGCAGAATGTGAGAGATTGCCCT  
TTGATTTACCGAAGCCGAGGAGGAATTAGTAGCAGGTTATCAAACCTGAATATTCAGGTATCAAATTTGGTTTTATTTTAT  
GTTGCTTCTTACCTAAATTTACTAGTTTCTTATTATTTCGTAACAGTTCTGTACTTGGGAGGGTGAATCTTCTCT---  
ATTCCATATATAACCAATTACTGAACTTTTCGAA-----  
ATAAATAAAACTAGTGAAGTCTTTGGAACAACAATTAGTCTCCTCATTACATTAGCTAAAGCTTATTTGTTCTGTTCAT  
TCCTATCTCAACAAGATGGACTTTACCTAGGCTGAGAATGGATCAACTATTAATCTTTGGGTGGAATCTCTTTTACCTA  
TTGCTCTCGGTAATCTATTATTGACAACCTTCTCCCAACTTGTTCGCTGTAA-----  
-----

ATGATCTGGCATGTCCAGAATGAAAACCTTCAATTCTCGATTCTACGAGAATTTTTATGAAAGCATTTCATTTGCTTCTCTT  
CAATGGAAGTTTTATTTTCCCAGAATGTATCCTAATTTTTGGCCTAATTCTTCTTCTGATGATCGATTTAACCTCT----  
--

GATCAAAAAGATACACCTTGGTTATATTTTCTCTCTTCCACAAGTTTAGTAATGAGCATAACCGCCCTATTGTTCCGATG  
GAGAGAAGAACCTATGATTAGCTTTTCGGGAAATTTCCAAACGAACAATTTCAACGAAATCTTTCAATTCCTTATTTTAC  
TATGTTCAACTCTATGTATTTCTCTATCCGTAGAGTACATTGAATGTACAGAAATGGCTATAACAGAGTTTTCTGTTATTT  
GTATTAACAGCTACTCTAGGAGGAATGTTTTTATGTGGTGCTAACGATTTAATAACTATCTTTGTAGCTCCAGAATGTTT  
CAGTTTATGCTCCTACCTATTATCTGGATATACCAAGAGAGATGTACGGTCTAATGAGGCTACTATGAAATATTTACTCA  
TGGGTGGGGCAAGCTCTTCTATTCTGGTTTTATGGTTTTCTTGGCTATATGGTTCATCCGGGGGAGAGATCGAGCTTCAA  
GAAATAGTGAACGGTCTTATCAATACACAAATGTATAACTCCCCAGGAATTTTCGATTGCGCTTATATCCATCACTGTAGG  
AATTGGGTTCAAGCTTTCCCCAGCCCTTTTCTCAATGGACTCCTGACGTATACGAAGGATCTCCCACTCCAGTCGTTG  
CTTTTCTTTCTGTTACTTTCGAAAGTAGCTGCTTCAGCTTCAGCCACTCGAATTTTCGATATTCCTTTCTATTTCTCATCG  
AACGAATGGCATCTTCTTCTGGAAATCCTAGCTATTCTTAGCATGATATTGGGGAAT

Oenothera

TTGCTGGGCTGATGATATTTTCTCACCATACAGGATGCGACTCAAAATCTTTATTTCTTTATAAACTCTCCCGGCGGGCTG  
GCAGTAGCCGATTACTCATTATGATGCTATGCAA---  
TACGTAGCACCTCCTGTGTATACACTAGGCCTGGGGTACTCGCCTCAATGGCATCCTTTCTACTGGTCGGCGGAGAAAC  
GTCCAAACGCCTAATGGGCCCTAACGGT---  
AGGGTAATGATACATCAGCCCAGTCCGATTATACTCACAAAGACCAATCGCTAGAGGTACAACCTGGACTCAGGGGAAGT  
AGAAGACATTTCGAAAATGGTCATAAGGGTTTTATCTAGAAAAGAACAAGGCTACCCCGGGAGGTTCTAAACGAC---  
CATTTGGAAAGAAATTTTTATGACAGCAACCGAAGCCAAATATTATGGAATTGTTGATGATATAGGGATTCAAATCT  
T-----  
-----  
-----  
-----  
-----  
-----  
-----  
-----

-----ATGGAG-----GAATTCCCGGGA-----TATTTCGAA-----  
CTAGATAGATCTCGACAACACGACTTC-----  
CTATACCCCTAATTTTTTCGGGAGTCTATTTATGCACTTGTCTCATGATCATGGTTTA-----AATAGA---AATAGA--  
-TCT-----ACTTTG-----TTCGAAAATGAAGTTGATTAT-----  
GACAAAAAATATAGTTTAATAATTGTGAAACGTTTAATTACTCGAATGTATCAA-----  
CGGAATCATTTGATTATTTTCGGCTAATGGT-----TCTGTTCAAATCCATTTTGGGGCCACAAT-----CAGAAT--  
-----TTGTATTCGAAAATCTATCAGAAGGGTTTGCAGTCATTGTGGAATTCATTTTCGCTACGAGTT---  
TTATCTTCTCTTT-----GAAAGGAAAAG------AAAGATATAGCAAAATCTCCT-----ACTTTACGA--  
-----

TCAATTCATTCAATATTTTCTTTTTTAGAGGACCAATTTTACATTTAGATTATTTGTACATGTACTAATACCCTATCC  
CATCCATTTGGAAATCGCGGTTCAAACCCTTCGCTACTGGGTGAAGGATGCCTCTTCTTTGCATTTATTACGTATCTTTC  
TACACGAGTAT-----TGGAATAGTTTT---AGTACT-----CCAAAAAGCATATTACCCTT---TTTTTA---  
-----AAAGGGAAT---

TCAAGATTCTTCTTGTTCCTCTATAATTCTTATGTATGTGAATACGAATCTATCTTCTTTTTATCCGCAATCAATCTTC  
G---CATTTCCAGTCAACATCTTCTGGAGTCTTTTTTGGAGCAATCCTTTTCTATGTAAAAATAGACCAT-----  
-----CTTGTGGAA-----GTT-----TTT---GTTGGGACTGATTTTCTGGACATC-----

CGATCCTTCTTCAAGGATCCGAATATGCATTATGTTAGATATCAAGGAAAATCTATTCTAGCTTCAAAGGATACACCTCT  
TTTGATGAATAAATGGAAATATTACCTTGTCAATTTATGGCAATATCATTTCCTGGTCTGGTCTCAACCCGGAAGGATCA  
ACATAAACCAATTA-----GGTAAGTATTCTCTTGACTTTTTGGGATATTTT-----  
TCAAACGTGCAACTAAAGTCTTCAGTGGTACGAAATCAAACGCTAGAGAATTCATTTCTAATAAATAATGCTATGAAGAA  
GCTCGAAACAACAGTTCCAATTTTGCCTCTGATTGGATCGTTGTCTCGAGCGAAATTTTGTAAATGCATTAGGACATCCCA  
TTAGTAAGCCGACCCGGAATGATTCATCCGATTCTGATATTATCGACCGATTTGTGCGTATATGCAGAAATCTTTCTCAT  
TATCACAGTGGG---  
TCTTCAAAAAAAAAAGAGTTTATATCGAATAAAGTATATACTTCGACTTTCTTGTGTTAAAACTTTGGCCCGTAAACATAA  
AAGTAGTGTA---CGCGCTTTTTTG-----AAAAGATTAGGTTCCGGAA---TTAGGGGACGAATTCCTTACAGAG-  
-----GAAGGAGTTGTTCTTGTCTGTGATCTTCCA-----AAA-----GCGTCGGGAAGG-----  
TTATAT-----AGAGGCCGAATTTGGTATTTGGATATTCCTTGTATCAAT-----GATCGGGTAGGCGAC-----  
-----  
-----ATGATAATTGAT-----ACAACCGCAGTA---CAA---GAT-----  
ATGAATTCCTTTTTCCAGATTGCAGTCCTTG-----  
AAAGAGGTCTCTGGAATCATATGGATGCTTGTACCTATTTTGGAGTCTTGTATTGGGGATTACTCTAGGTGTACTCGTAAT  
AGTGTGGTTAGAAAGGGAAATATCCGCCGGAATACAACAACGATTGGGCCTGAATACGCAGGGCCTATGGGAATTCCTC  
AGCCTTTAGCTGATGGAATAAAACTCATTTCCAAAGAGAATCTTCTCCCGTCTCGAGGAGATACTCGTTTATTTCAGCATA  
GGACCATCCATAGCAGTTATATCCATTTTATTAAGTTATTCAGTAATTCCTTTTAGCTCTCACCTTGTCTTATCTGATCT  
CAATATCGGTGTTTTTTTTGTGGATTGCCGTTCCAGTATTGCTCCCATCGGACTTCTTATGTCAGGATATGGATCAAATA  
ATAAATATTCTTTTTTAGGTGGTCTACGAGCCGCTGCTCAATCAATTAGTTATGAAATACCATTAACTCTT---  
TGTCTGTTATCAATATCTCTACTATCTAACAGTTTAAAGTACAGTTGATATAGTTGAAGCCCAATCAAATATGGTTTTGTG  
GGGGTGAATCTGTGGCGCCAACCTATAGGGTTTTGTTTTTCTAATTTCTTCCCTAGCAGAATGTGAAAGATTACCCT  
TTGATTTACCAGAAGCAGAAGAAGAAATTAGTAGCAGGTTATCAAACCGAATATTCAGGTATCAAATTTGGTTTTATTTTAC  
GTTGCTTCCCTATCTAAATCTATTAGTTTCTTCGTTATTTGTAACAGTTCTTTACTTGGGCGGTTGGAATATCTCT---  
ATCTCGTACATATTGTTTCTGGGCTCTTTGAA-----  
ATAACTAAAGTGGGTAGAGTTTTTGGAACGACAATTGGTATTTTTACTACATTGGCTAAAACCTTATTTGTTTTTGTTCAT  
TTCTATCACAACAAGATGGACTTTACCTAGGCTAAGAATGGACCAATTATTAATCTTGGATGGAAATTTCTTTTACCCA  
TTTCTCTCGGTAATCTATTATTAAGAACTTCTTCCAACCTTCTTTCACTGTAA-----  
-----  
ATGATCTGGCATGTACAGAATGAAAACCTCATTGTGGATTCTACGAGAATTTTTATGAAAGCCTTTCATTTGCCTCTCTT  
CGATGGAAGTTTTATTTTCCAGAAGGTATCCTCATTTTTGGCCTAATTCTTCTTCTGATGATCGAATCAACCTCT----  
--  
GATCAAACAGATATACCTTGGTTCTATTTTCTCTTCAATAAGTTTGTAGTAATGAGCATAACGGCCCTATTGTTCCGATG  
GAGAGAAGAACCTAGGATTCTCTTTTCCAGGAAATTTCCAAACGAACAATTTCAACGAAATCTTTCAATTTCTTATTTTAC  
TATGTTCAACTCTATGCATTCTCTATCCGTAGAGTACATTGGATGTACAGAAATGGCTATAACAGAGTTTCTGTTATTC  
GTATTAACCGCGACCCTAGGAGGAATGTTTTTATGCGGTGCTACCGATTTAATAACTATCTTTGTAGCTCCAGAATGTTT  
CAGTTTATGCTCCTCCCTATTATCTGGATATACCAAGAAAGATGTACGGTCTAATGAGGCTACTATGAAATATTTACTCA  
TGGGGGGGGCAAGCTCTTCTATTCTGGTTTCTGTTTTCTTGGCTATATGGTTTCTCCGGGGGGGAGATCGAGCTTCAA  
GAAATAGTGAATGGTCTTATCAATACACAAATGTATAACTCCCCAGGAATTTCAATTGCGCTTATATTTCATCACTGTAGG  
AATTGGGTTCAAGCTTTCCCGAGCCCTTCTCATCAATGGACTCCTGACGTATACGAAGGATCTCCCACTCCAGTTGTTG  
CTTTTCTTTCTGTTACTTTCGAAAGTAGCTGCTTCAGCTTCAGCCACTCGAATTTTCGATATTCCTTTTTTTTTTCTCATCT  
TTGAAATGGCATCCTCTTCTGGAAATCTAGCTATTCTTAGCATGATATTGGGGAAT  
Oryza  
TTACAGGTCTCATGGTATATCTCAGTATAGAAGATGGAAGTAGCGATATTTTTTGTATAAACTCCCCGGCGGTTGG  
TTAATCTCAGGAATGGCGATTTTTGATACGATGCAA---  
ACGGTAACACCAAATATATATAACAACATGCCTAGGAATAGCCGCGTCCATGCCGTCTTCAATTCTGCTTGGAGGAGAACC  
CACCAAGCGTATAGCATTCCCCACGCG---AGGATTATGCTTCCCAACCTGCTAGTGCTTAT---  
TATCGGGCAAGAACACCAGAATTTTACTAGAAGTGAAGAGTTACACAAAGTTTCGCGAAATGATCACAAGGGTTTATGC  
ACTAAGAACAGGCAAGCCTTTTTGGGTTGTATCCGAA---  
GACATGGAAAGGGATGTTTTTATGTCAGCAGACGAAGCCAAAGCTTATGGACTTGTGATATTGTAGGGGATGAA-----  
-----ATG---ACAGAA-----  
AAGAAAAATAGGAGAGAAAAAACCAGAGAGAAGCAAAAATTACTTTC---GAGGGTTAGTTATGGAAGCC---  
CTACCCAACGGA-----ATGTTCCGCTTCCGCTAGAGAATGACACCATCATCCTGGGCTATATTTAGGAAAG-----  
-ATCCGGTCTAGTTCTATACGAATACTGATGGGG-----  
GATAGGGTCAAAATTTGAAGTAAGTCTTATGATTCAAGCAAGGGGCGTATAATTTATAGACTTCCCATAAGGATTTCGAA  
GCGTACCGAAGACTCGAAGGATACCGAAGATTTGAAGGATACCAAAGATTCAAAGGGTTAG-----  
ATGCAACACCCTGTTCTGACCATATTGTAATGATCACCATTTGATAAACCGAGAAATATTTCTCTCTCTGATTCA

AGTAGAAATACAAATGGAA-----AAATTCGAGGGT-----TATTCAGAA-----  
AAACTTAAATTTTCTAGACAATATTTT-----  
GTCTACCCACTACTCTTTTCCAGGAGTACATTTATGTGTTTTGCCCATGATTATGGATTA-----AATGGT-----  
-TCC-----GAACCTGTTCGAAATT---ATTGGTTCT-----  
AATAACAAGAAATTTAGTTTCACTACTTGTGAAACGGTTAATGATTTCGAATGTATCAG-----  
CAGAATTTTTGGATTAATTTGGTTAATCAT-----CCTAACCAAGATCGATTATTGGATTACAAC-----  
AATTTTTTTTATTCTGAGTTTTATTCTCAGATTCTATCTGAGGGGTTTGGCATCGTTGTAGAAATCCCATTCTCGCTACG  
AGAA--CAGTCTTGTCCG-----GAAGAA-----AAAGAAATACCAAAGTTTCAG-----  
AATTTACGA-----  
TCTATTCAATCAATATTTCTTTTTTGAAGACAAATTTTTGCACTTACATTATCTAGCACATATAGAAATACCCTATCC  
TATCCATTTGGATATCTTTGCTTCAACTCCTTCAATACCGGATCCAAGATGTTCCATCCTTGCATTTATTGCGATTCTTTC  
TCAACTACTACTCGAATTGGAATAGTTTT---ATTACT-----TCAATGAAATCCATTTTTATT---TTGAAA---  
-----AAAGAAAAT---  
AAAAGACTATTTTCGGTTCCTATATAACTCTTATGTATCAGAATATGAATTTTTCTTGTGTTTTCTTCGTAAACAATCTTC  
T---TGCTTGCATTAACCTTCTTCCGGAACCTTTCTGGAACGAATCATCTTTTCTAGGAAGATGGAACAT-----  
-----TTTGGGTTA-----ATG-----TAC---CCT---GCTTTTTTTCGGAACC-----  
ATATGGTTCGTTATGGATCCCCTTATGCATTATGTTTCGATATCAAGGAAAGGCAATTCTTGCATCAAAAGGAACTCTTCT  
TTTGAAGAAGAAATGGAAATGTTACCTTGTCCGTTTGTGGCAATATTTCTTTCTTTTTTGGACTCAACCGCAAAGGATCC  
ATCTAAACCAATTA-----GAAACTCTTGTTCGATTTTTCTGGGGTACTTT-----  
TCAAGTGTACCAATAAATTTCTTTGTTAGTAAGGAATCAAATGCTGGAGAATTCATTTCTAATAGATACTCAAATGAAAA  
ATTCGATACCAAAGTCCCTGTTACTCCTCTCATTGGATCTTTAGCAAAGCCCAATTTTGTACTGGATCGGGGCATCCTA  
TTAGTAAACCAATTTGGACCGATTTATCGGATTGGGATATTCTTGATCGGTTTGGTTCGGATATGTAGAAATCTTTTTCAT  
TATCACAGTGGAA---  
TCTTCAAAAAGAAGACTTTGTATCGACTAAAGTATATACTTCGACTTTCATGCGCTAGAACTTTAGCTCGTAAACATAA  
AAGCACGGTA---CGAGCTTTTATG-----CAATGGTTGGGTTTCGGTA---TTTTTAGAAGAATTTTTTACGGAA-  
-----GAAGAGCAAGTTTTTTCTTTGATGTTCCGCC-----AAAACAACCTACTTTTTCTTTCCGTGGA-----  
TCGCAC-----AGTGAGCGTATTTGGTATTTGGATATTCTCCGTATCAAT-----GATCTGGTGAATCCT-----  
-----  
-----ATGATAATAGAC-----AGGGTACAGGTA---GAA---GCT-----  
ATCAATTTCTTTTTCGAACTTGGAAATTATTA-----AAAGAAGTCTATGGACTGATATGGATTCTA---  
CCCATTTTGACCCTCTTACTGGGAATCACAATAGAAGTACTCGTAATTGTGTGGTTAGAAAAGAGAAATATCCGCATCGAT  
ACAACAACGTATTGGTCTGAATATGCTGGCCCCCTGGGACTGCTTCAAGCTATAGCAGATGGAACCTAAGCTACTTTTTTA  
AAGAGGATATCTTGCCATCCCAGGGGATATTCCCTTATTTAGCATTGGACCGTCTATAGCAGTCATATCAATTTTTATTA  
AGTTTTTTAGTTATTCTTTGGGATATCGCTTTGTTTTAGCGGATCTTAGTATTGGTGTTTTTTTATGGATTGCCATTTT  
AAGTATTGCTCCTATTGGTCTTCTTATGGCAGGATATAGCTCAAATAATAAATATTCTTTTTTTCAGGTGGTCTACGAGCTG  
CCGCTCAATCTATTAGTTATGAAATCCCATTAACCTTTT---  
TGTGTACTAGCAATATCTCTACTATCCAACAGTTCAAGTACAGTTGATATAGTTGAAGCACAGTCAAAATATGGTTTTTT  
TGGATGGAATCTTTGGCGTCAGCCTATAGTTTTCTGGTTTTTCTAATTTCTTCTTTGGCGGAATGTGAAAGATTACCCT  
TTGATTTACCAGAAGCGGAGGAAGAATTAGTAGCAGGTTATCAAACCGAATATTCTGGTATCAAATATGGTTTTATTTTAT  
CTTGTCTTACCTAAATTTATTAGTTTCTCTTTATTTGTAACAGTTCTCTACTTAGGCGGGTGAATTTGTCT---  
ATTCCTATATATCCTTTTTTTGGATTTTTCCAA-----  
ATGAATAAAATGGTTGGAATTTTAGAAATGACAATGAGTATCTTTATTACATTAACCTAAAGCTTATTTATTTCTTTCAT  
TTCTATCACAATAAGATGGACTTTACCCAGGATGAGAATGGATCAGTTATTAATCTTGGATGGAATTTCTTTTACCTA  
TTTCCCTGGGCAATCTCTTATTAACAACCTTCTTCCCAACTTGTTTTCACTATA-----  
-----  
ATGATCTGGCATGTACAGAATGAAAACCTTCAATCTCGATTCTACGAGAATTTTTATGAAAGCGTTTCATTTGCTTCTCTT  
CCAGGGAAGTTTTCATTTTCCAGAATGTATCCTAATTTTTGGCCTAATTTCTTCTTCTGATGATCGATTTAACCTCT----  
--  
GATCAAAAAGATAGACCTTGGTTCTATTTTCACTCTTCAACAAGTTTTAGTAATAAGCATAACGGCCCTATTGTTCCGATG  
GAGAGAAGAACCTATAATTAGCTTTTTCGGGAAATTTCCAAACGAACAATTTCAACGAAATCTTTCAATTTCTTATTTTAT  
TATGTTCAACTTTATGTATTCCTCTATCCGTAGAGTACATTGAATGTACAGAAATGGCTATAACAGAGTTTCTGTTATTC  
GTATTAACAGCTACTCTAGGGGGAATGTTTTTATGTGGTGTACACGATTTAATAACTATCTTTGTAGCTCCAGAATGTTT  
CAGTTTATGTTCTACCTATTGTCTGGATATACCAAGAGAGATCTACGGTCTAATGAGGCTACTATGAAATATTTACTCA  
TGGGTGGGGCAAGCTCTTCTATTCTGGTTTCATGGTTTTCTTGGCTATATGGTTCATCTGGGGGGGAGATCGAGCTTCAA  
GAAATTGTGAACGGTCTTATCAATACACAAATGTATAACTCCCCAGGAATTTCAATTGCGCTTATATCCATCACTGTAGG  
ACTTGGGTTCAAGCTTTCCCGAGCCCTTTTTCATCAATGGACTCCTGACGTCTACGAAGGATCCCCACTCCAGTCGTTG



CTTTTCTTTCTGTTACTTCGAAAGTTGCTGCTTCAGCTTCAGCCACGCGAATTCTCGATATTCCTTTTTATTTCTCATCA  
AACGAATGGCATCTTCTTCTGGAAATCCTAGCTATTCTTAGCATGATATTGGGGAAT

Panax

TTATTGGTCTTATGGTATATCTCAGTATCGAGGATGATACCAAAGATCTGTATTTGTTTATGAACTCTCCTGGGGGATGG  
GTACTCCCTGGAATAGCTATTTATGATACTATGCAA---

TTTGTGCGACCAGATGTACATACAATATGCATGGGATTAGCTGCTTCAATGGGATCTTTTATCTTGGCCGGAGGAGAAAT  
TACCAAACGTCTAGCATTCCCTCACGCT---AGGGTAATGATCCATCAACCTGCTAGTTCTTTT---

TATGAGGCACAAACGGGAGAAATTTGTCCTGGAAGCGGAAGAAGCTGCTGAAACTGCGTGAAACCATCACAAGGGTTTATGT  
ACAAAAACGGGCAAACCCTTTTGGGTTGTCTCGGAA---

GACCTGGAAAGAGATGTTTTTATGTCAGCAACAGAAGCCCAAGCTTATGGAATTGTTGATCTTGTAGCGGTTGAG-----  
-----ATG---AAAGAA-----CAAAAA-----

-----TGGATTCAT---GAAGGTTTAAATTACTGAATCG---CTTCCCAATGGC-----  
ATGTTCCGGATTTCGTTAGATAATGAAGATATGATTCTAGGTTATGTTTCAGGAAAG-----

ATCCGACGTAGTTTTATACGGATACTGCCAGGC-----  
GATAGAGTAAAAATTGAAGTAAGTCGTTATGATTCAACCAGAGGACGTATAATTTATCGACTTCGC-----

-----ATAAGAATTGAAAGATTAG-----  
-----ATGGAG-----GAATCCAAAGA-----TATTTAGAG-----

CTAGATAGATCTCAACAACACTACTTC-----  
TTATATCCACTTATCTTTTTCAGGAGTATATTTATGCACTTGCTCATGATCATGGTTTA-----AATATA---AATAGA--

-TCC-----ATTTTG-----TTGGAAAAT---GCGGGTTAT-----  
GACAATAAATTCAGTTTACTAATTGTGAAACGTTTAAATTGCTCGAATGTATCAA-----

CAGAATCATTGATTCTTTCTACTAATGAT-----TCTAACCAAAATAGATTTTTGAGGCGCAAC-----AAGAAT--  
-----TTGTATTCTCAAATGATATCAGAGGGGTTTGCAGTCATTGTGAAATTCCATTTTTATCTACAATTA---

AAATCTTCCCTA-----GAAAGC-----AAAGGGATAGTCAAATCTCAT-----AATTTACGA--  
-----

TCAATTCATTCAATATTTTCTTTTTTAGAGGACAAAATTTACATTTAATTTATGGTTTAGAGATACTAATACCCTACCC  
AGTCCATCTGGAAATCTTGGTTCAAACCTCTTCGCTACTGGGTAAGATGCTTCTTCTTTGCATTTATTACGATTCTTTC

TCCACGAGTATTGTAATTGGAAT-----ACT-----CAAATAAAGCCGGTTCTTCT---TTTTCA---  
-----AAAAGAAAT---

CAAAGACTATTCTTCTTACTATATAAATTCATCTATGTGAATACGAATCCATCTTTCATCTTTCTCCGTAACCAATCTTC  
T---CATTTACGCTCAACATCTTCTGGAACCCTTCTTGAACGAATCTATTTCTATGGAAAAATAAAATAT-----

-----CTTGTAATA-----GTC-----TTT---GTT---AAGGCTTTTCAAGTCAAT-----  
CTATTGTTGTTGAAGGATCCTTTTCATGCATTATGTTAGGTATCAAGGAAAATCAATTCTCGCTTCAAAGGGGACGCCCTT

TTTGATGAAAAATGGACATATTACTTTGTTAATTTATGGCAATGTCATTTTTACCTGTGGTCTCAACCGGGAAGGATCT  
GTATAAACCAATTA-----TACAATCATTCCCTCGACATTCTGGGCTATCTA-----

TCAAGTGCAGCGCTAAACCCTTCAATGGTACGCGGTCAAATGCTAGAAAATTCATTTCTAATTGATAATGCTATTAATAA  
GTTTCGATGCTATTGTTCCAATTATTCCTCTGATTGGATCATTGGCTAAAGCGAAATTTTGTAAACGTATTGGGGCATCCTA

TTAGTAAGGCGGTTTGGACCGATTTATCAGATTCTGATATTATTGACCAATTTGGGCGTATATGCAGAAATCTTTCTCAT  
TATCATAGTGGA---

TCCTCACAAAAAAGAGTTTGTATCGAATAAAGTATATACTTCGACTTTCTTGTGCTAGAACTTTGGCTCGTAAACACAA  
AAGTACTGTA---CGTGCTTTTTTG-----AAAAGATTGGGCTCGGGA---TTATTGGAAGAATTCTTTACGGCG-

-----GAAGAACAAGTTCTTTACTTGACCTTTCCA-----AGAGCA---TCTTCCGCTTCGCAGAGG-----  
TTATAT-----AGAAGGCGGATTTGGTATTTGGATATTATTTGTATCAAT-----GATTTGGCCAATCATGAA-----

-----ATGATAATAGAT-----ACAACAGAAGTA---CAA---GCT-----  
ATCAATTCTTTTTTTAGATTGGAATCCTTA-----

AAAGAGGTATATGGGATCATATGGATGCTTATCCCTATTTTTACTCCTGTATTAGGAATCACAATAGGTGTACTAGTAAT  
TGTTTGGTTAGAAAAGAGAAATATCTGCAGGGATACAACAACGTATTGGACCTGAATACGCCGGGCTTTGGGAATCTTC

AAGCTTTAGCAGATGGTACAAAATTACTTTTTCAAAGAGAATCTTCTTCCATCGAGAGGAGATACTCGTTTATTTCAGTATC  
GGACCATCCGTAGCAGTTACATCAATTCTACTAAGTTATTTAGTAATTCCTTTTGGCTATCACCTTGTTCTAGCCGATCT

CAGTATCGGTGTTTTTTTTATGGATTGCCATTTCAAGTATTGCTCCCGTTGGCCTTCTTATGTCAGGCTATGGATCAAATA  
ATAAATATTCCTTTTTTGGTGGTTTACGAGCTGCTGCTCAATCAATTAGTTATGAAATACCATTAACTCTA---

TGTGTGTTATCAATATCTCTACTATCTAACAGTTCAAGTACAGTTGATATAGTTGAAGCGCAGTCAAATATGGTTTTTG  
GGGGTGGAAATTTGTGGCGTCAACCTATAGGGTTTATCATTTTTCTAATTTTCGTCCTAGCCGAGTGTGAGAGATTACCTT

TTGATTTACCAGAAGCAGAAGAAGAAATTTGGTAGCAGGTTATCAAACCGAATATTTCAGGTATAAAATTTGGTTTTATTTAC  
GTTGCTTCGTATCTGAATCTACTAGTTTCTTCATTATTTGTAACGGTTCTTTACTTGGGGGGTTGGAATCTTTCT---

ATTCCGTACATACCCGTTCTGATATTTTTGAA-----  
ATAAATAAAGCGAGTAGAGTATTTGGAACAATAACTGGTATCTTTATTACATTAGCTAAAACCTTATTTGTTCTTATTCAT  
TCCTATCACAAACAGATGGACTTTACCAAGGCTAAGAATGGACCAACTATTAATCTTGGATGGAAATTTCTTTTACCCA  
TTTCTCTCGGCAATCTATTATTAACAACCTCTTCCCAACTTCTTTCACTGTAA-----

ATGATCTGGCATGTACAGAATGAAAACCTTCATTCTCGATTCTACGAGAATTTTTATGAAAGCCTTTCATTTGCTTCTCTT  
CGATGGAAGTTTGATTTTCCCAGAATGTATCCTAATTTTTGGCCTAATCTTCTTCTGATGATCGATTCAACCTCT----

GATCAAAAAGATATACCTTGGTTATATTTTCATCTCTTCAACAAGTTTAGTAATGAGCATAACGGCCCTCTTGTTCGGATG  
GAGAGAAGAACCTATGATTAGCTTTTCGGGAAATTTCCAAACGAACAATTTCAACGAAATCTTTCAATTTCTTATTTTAC  
TATGTTCAACTCTATGTATTTCTCTATCCGTAGAGTACATTGAATGTACAGAAATGGCTATAACAGAGTTTCTCTTATTC  
GTATTAACAGCTACTCTAGGAGGAATGTTTTTATGCGGTGCTAACGATTTAATAACTATCTTTGTAGCTCCAGAATGTTT  
CAGTTTATGCTCCTACCTATTATCTGGATATACCAAGAAAGATGTACGGTCTAATGAGGCTACTATGAAATATTTACTCA  
TGGGTGGGGCAAGCTCTTCTATTCTGGTTCATGGTTTTCTCTTGGCTATATGGTTCATCCGGGGGAGAGATCGAGCTTCAA  
GAAATAGTGAATGGTCTTATCAATACACAAATGTATAACTCCCCAGGAATTTCAATTGCGCTCATATTCATCACTGTAGG  
AATTGGGTTCAAGCTTTCCCCAGCCCTTCTCATCAATGGACTCCTGACGTATACGAAGGATCTCCCACTCCAGTCGTTG  
CTTTTCTTTCTGTTACTTTCGAAAGTAGCTGCTTCAGCTTCAGCCACTCGAATTTTCGATATTCCTTTTTTATTTCTCATCA  
AACGAATGGCATCTTCTTCTGGAAATCCTAGCTATTCTTAGCATGATATTGGGGAAT

Pelargonium

TCGTGGGTCTTATGATACATCTCAATATAGAAGATCCTTTCTGGACTCAAACCTTGTATATAAACTGTCTTGGCGGATTG  
ATAATTTCCGGGCTGGCTCTTTATGATACTATTGGC---  
TTTGTGGAACCAGACGTAAAGACAATATGCCTGGGAATAGCCGCTTCGATGGCATCCGTTGTCCTGGTCCGGAGGAACCGT  
TACAGAACGTTGCGCATTCCCTAACGCT---AGGGTAATGATCCATCAACCTCGTGCGAAGGAG---  
TTTGACGACCGTTTTTCGGACCTTAATTTGGAAGGGCATCTATTCTTACAATTGCGCAACTGCGTCACACAAATTTATAT  
CCATAGAACAACAACCTGCTTGGGTTATAATTGCA---  
GACCTGGAAAGGGATACTTTTATGTGACGAACAGAAGCGAGGACTTATGGAATTATTGATGGGGTATATGCTTTTCAAGA  
AGAATATGAAGAATGGAGTTAG-----

-----ATGGA-----GAATTTCAAGGA-----TATTTAGAA-----

CTCGATAGATCGAGGCAACATGATTTT-----  
CTATACCCACTTATCTTTTCGGGAGTATATTTATGGACTTGCGCATGGTCATGGTTTA-----AATAGAAGTGGA-----  
-TTC-----CTTTTG-----TTGGACAAT---GTTGATTAT-----  
GACAATAAATATAGTTTTCTGATTGTGAAACGTTTAATTGCTCGAATGTATCAA-----  
CAGAACCCTTTTACATTTGCGAAAATGAT-----TCTGCCCTAAATCAATTTATTGGGCACAAT-----AAGAAT--  
-----TTGTATTCTCAAATGATATCAGAAGGATTTGCAGACATTGTGAAATTTCACTTTTTATACAACATA---  
GTATCTTACTTA-----GACGGG-----AAAGCAACATCAAATCTCTT-----AATTTACGA--  
-----

TCAATTCATTCAATCTTTCCCTTTTTAGAGGATGAATGTTCTCATTTAAATTATGCGTCAGATATACTAATACCCACCC  
TACCCATCTGGAATACTAGTTGAAGTTCTTCGTTATTCGGTGAAAGATGCCTCTTTCCTGCATTTTTTAAGGTTCCCTC  
TTTACGAGTATTGGAGTTGGAAGAGTCTT---TCTATA-----AAAAAAAAGCGAGTTCCATT---GTGTCA---  
-----AAAAAAT---

GAAAGATTCTTCGTCTTCTATATAATTCTCATGTATGTGAATACGAATCTATCCTCCTTTTTCTTCGCAATCAATCTTC  
T---CATTTACGATCAACATCTTTTGGAAATCCTTCTTGAGCGAATTTTTTTCTATAAAAAAATTGGAGGT-----  
-----CTTGTAGCT-----ATC-----TTT---GGG---

ACTCCTTTTGGAGCATATTCATATTTTGGGTTTTTAAAGGACCCCTTAATCCATTATGTTAGATACCAAGGAAATCCAT  
TCTGATTTCAAAGACCGGCCCTTTTGGATGAATAAATGGAAATATTATCTTGTCAAGTTATGGCAATGTCATTTTTATG  
TATGGTCTCAACCAGGAAGGATCCACATAAACCATTA-----TCCCAACATTCCCTACACCTTCTAGGCTATCTT---

TTAAGCGTAGGAACAAATCCTTTGGTAGTACGGAGTCAAGTATTGACAATTCATTTCTAATAGATAATGCTATGAATAA  
GTTAGAAACAAGAATTTCCCTTTTTTCTCTAATTTGGATCCTTGACTAAAGCGCAATTTTGTAAATCCGTTAGGGCAGCCCA  
TCAGTAAGTCCACTTGGGCCGATTTCATCCGATTCTGATATTATTGACCGATTTGTGCGTATGTGCAGAAATCTTTCTCAT  
TATTACAGCGGG---

TCTTCAAAAAACAGAGTTTGTATCGACTCAAATATATACTTCGACTTTCTTGTGTTAAACTTTGGCTCGTAAACACAA

AAGTACTGTA---CGTGCTTTTTTTG-----AAAAAATTAGGTTTCGGAA---TTATTGGAAGAATTTATTAAGGAG-  
-----GAAGAACAAGTCCTTTTCTTTGCTCTTTCCA-----AGAGCC---CTTTCTGCTTCGAGGAGG-----  
TTATCT-----ACAGGGCGGATTTGGTATTTTGATATTCTTTGTATCAAC-----GATTTGGCCAATCATGAATGA--  
-----  
-----ATGATAATTGAT-----ACACCAGAAGTA---CAA---GAT-----  
ATCAATTCTTTTTCCAGATTTCGAATCCCTA-----  
CAAGAGATATATGGGATCGTCTGGATGCTTGTCCCTATTTTGACCCTTGTAGTGGGAATCACAATAGGTGTATTAGTAAT  
TGTGTGGTTAGAAAAGAGAAATATCCGCGGGGATACAACAACGTATTGGGCCTGAATACGCGGGTCCTTTTCGGAATTCCTC  
AAGCTCTAGCAGATGGGACAAAACCTGCTTTTGAAAGAGAACCTTCTTCCATCTAGAGGGGATAGCCCTTTGTTCAGTATT  
GGCCCATCCATGGCAGTCATATCAATTCTTCTAAGTTATTAGTAATTCCTTTTAGCTATCGCCTTGTTTTAGCTGATCT  
AAATGTTGGTGTTTTTTTTAGGATTGCCATTTCAAGTATTGCTCCCATTGGACTTCTTATGTCAGGATATGGATCAAATA  
ATAAATATTCCTTTTTTAGGTGGTCTACGAGCTGCCGCTCAATCAATTAGTTATGAAATACCATTAACCTCTA---  
TGTGTGTTGTCAATATCTACTTTCTAATAGTTCAAGTACAGTCGATATAATTGAGGCACAATCAAAAATATGGTTTTTG  
GGGATGGAATTTGTGGCGTCAACCTATAGGGTTCTTATTTTTCTAATTTCTTCCCTAGCCGAATGCGAAAGATTACCCT  
TTGATTTACCAGAAGCAGAGGAAGAATTAGTAGCCGGATATCAAACGGAATATTCAGGTATAAAGTTTGCTTTTTTTTAC  
ATTACTTCTATTTCAATTTATTAGTTTCTTCTTTATTTGTAAACAATTCTTTATTTAGGCGGTTGGAATATGTCT---  
ATTCCATACATAGACTTTCTTCCATTATTTGAA-----  
ATAAATAACGTGGGTGGAATCTTTAGAACAACAACCGAACTTTTTATTACATTAGCTAAAACCTTTTTTTTTCTTGTATTAT  
TTCTATCACAACAAGATGGACTTTACCTAGGCTAAGAATGGACCAACTCTTAAATCTTGGGTGGAATTTCTTTTACCTA  
TTTCTCTCGGTAATCTATTATTAACAACCTTCTTCTCAACTCCTTTCTCTGTAA-----  
-----  
ATTCTCGATTCTACGAGAATTTTTATGAAAGCCTTTCATTTGCTTCTCTTCGATGGAAGTTTGATTTTCCCAGAATGTAT  
CCTCATTTTTGGCCTAATTCCTTCTTCTGATGATCGATTCAACCTCG-----  
GATCAAAAAGATATACCTTGGTCTATTTTCATCTCTTCAACAAGTTTAGTAATGAGCATAACGGCCCTATTGTTCCGATG  
GAGAGAAGAACCTATGATTAGCTTTTCAGGAAATTTCCAAACGAACCATTTCAACGAAATCTTTCAATTTCTTATTTTAC  
TATGTTCAACTCTATCTATTCCTCTATCCGTAGAGTACATAGAATGTACAGAAATGGCTATAACAGAGTTTCTGTTATTC  
ATATTAACAGCTACTCTAGGAGGAATGTTTTATGCGGTGCTAACGATTTTCATAACTATCTTTGTAGCTCCAGAATGTTT  
CAGTTTATGCTCCTACCTATTATCTGGATATACCAAGAAGATGTACGGTCTAATGAGGCTACTATGAAATATTTACTCA  
TGGGTGGGCAAGCTCTTCTATTCTGGTTCAATGTCTTCTCTTGGCTATATGTTTCATCCGGGGGAGAGATCGAGCTTCAA  
GAAATAGTGAATGGTCTTATCAATACACAAATGTATAACTCCCGAGGAATTTCAATTGCGCTTATATTATCATCACTGTGGG  
AATTGGATTCAAGCTTTCCCGAGCCCTTCTCATCAATGGACTCCTGACGTATACGAAGGATCTCCCACTCCAGTCGTTG  
CTTTTCTTTCTGTTACTTTCGAAAGTAGCTGCTTCAGCTTCAGCCACTCGAATTTTCGATATTCTTTTATTTCTCATCA  
AACGAATGGCATCTTCTTCTGGAATCCTAGCTATTCTTAGCATGATATTGGGGAAT  
Phalaenopsis  
TTGTTGGTCTCATGGTATATCTCAGCATAGAAGATGATACTAGGGATCTTTATTTGTTTATAAATTCTCCAGGTGGATGG  
GTAATACCAGGAATAGCCATTTATGATACTATGCAA---  
TTTGTGTTACCAGATGTACATAACAATATGTATGGGATTAGCCGCTTCAATGGGATCTTTTATTCTGGTTCGGAGGAGAAAT  
TACCAACGTCTAGCATTCCCTCAGCT---AGGGTTATGATTACCAACCTGCTAGTTCTTTT---  
TACGAGGCACAAGCAAGGGATTTTATCCTGGAAGCAGAAGAACTATTGAAGCTTCGCGAAACTCTCACAAAAGTTTATGT  
ACAAAGAACGGGCAACCCTTTATGGGTTATATCTGAA---  
GATATGGAAAGGGATGTTTTTATGTCAGCAACAGAAGCTCAAGCTCATGGCATCGTTGATCTTGTTCGCGATCGAAAATGA  
AAATACTGGGAATTCCATA-----ATG---AAAGAA-----CAGAAA-----  
-----TTGATTCAT---GAGGGTTTAATTACTGAATCA---CTACCCAACGGT-----  
ATGTTCCGAGTTCGATTAGATAATGAAGATCTAATTCTAGGTTATATTTTCAGGGAGA-----  
ATCCGGCGCAGTTTTATACGTATACTACCCGGA-----  
GATAGAGTCAAAATTGAAATGAGTCGTTATGATTCAACCAGGGGACGTATAATTTATAGACTTCGC-----  
-----AAAAAAGATTTCGAACGATTAG-----  
-----  
-----ATGTATCAA-----  
CAGAAATATTTGATTTCTTCGGTGAGTGAT-----TCTAACCAAAAATGGATTTTCGCTGCACAAG-----  
AATTCTTTTTTCTTATCATTTTTTATTCTCAAATGGTATCAGAAGTTTTGGAGTCATTCTGGAAATTTTATTCTCGTCGCG  
ATTA---GTATCCTCCCTT-----GAAGAA-----AAAAGAATACCAAAATCTCAG-----  
AATTTACGA-----  
TCTATTCATTCAATATTTCCCTTTTTAGAGGATAAATTATCACATTTAAATTATGTGTCCGATCTACTAATACCCTATCC





Piper

TTGTTGGTTTTGATGGTATATCTCAGTATAGAGGATGGTACTCGGGATCTTTATTTGTTTTATAAACTCTCCCGGCGGGTGG  
GTAATCCCGGGAATAGCTATTTATGATACTATGCAA---  
TTTGTGTACCAGATGTACATACAATATGCATGGGATTAGCAGCTTCAATGGGATCTTTTCATCCTGGTCCGAGGGGAAAT  
TACCAAACGTCTAGCATTCCCTCACGCT---TGGGTTATGATCCACCAACCTGCTAGTTCTTTT---  
TATGAGGCACCTACAGGAGAATTTATCCTGGAAGCGGAAGAATTACTGAAACTCCGCGAAACCCCTCACAAGGGTTTTATGT  
ACAAAGAACAGGCAACCCTTTATGGGTTGTATCTGAG---  
GACCTGGAAAGGGATGTCTTTATGTGAGCAACAGAAGCCCAAGCTCATGGCATTGTTGATCTTGTAGCCGTCGAAAATAG  
CGGGAATTTTACA-----ATG---AAAGAA-----CAAAA-----  
-----TTGATTCAT---GAAGTTTTAATTACTGAATCA---CTTCCCAATGGT-----  
ATGTTCCGGGTTTCGTTTATAGATAATGAAGATTTAATCCTAGGTTATGTTTTAGGGGAGA-----  
ATCCGGCGCAGTTTTTATACGGATACTGCCGGG-----  
GATAGAGTCAAAATCGAAGTAAGTCGTTATGATTCAACCAGAGGACGTATAATTTATAGACTTCGC-----  
-----AACAAAGATTGCAACGATTAG-----  
-----ATGGAA-----AAATTCAAAAGA-----TATTTAGAA-----  
ACATTTAGATCTGAGCAAAAGTACTTC-----  
CTGTATCCACTTCTTTTTTCAGGAATATATCTACGCACTCGGCCATGATCATGGTTTA-----AATGGA-----  
-CCG-----ATTCTTACGAATCCATAGAAAAT---TLAGGTTAT-----  
GGCGATAAATCTAGTTCACTAATTGTGAAACGTTTAATTATTGCAATGCATAAA-----  
CAGAATCATTTTTCTTATTTCTTGTAAATGAAAATGATTTTTCAACAAAATCGATTGTTGGGGCGAAAA-----AACAAAT--  
-----TTGGATTGCAAAATTATATCGGAGGCTTTTTCAATTATTGTGAAATTCATTCTCCTTCCAATTA---  
GTGTCTTGCCTA-----GAAAAAAA-----AGAGAAATAGCAAAATCTCAT-----AATTTACGA--  
-----  
TCTATCCATTCAATATTTCCCTTTTTTGGAGACAATATATTCTATTTATATCATATATCGGATGTATTAATACCGTACCC  
TATTCATCCAGAAATTTAGTTCAAACCCTTCGTTACTGGATACAAGACGTTCCCTCTTTGCATTTATTGCGAATCTTTT  
TATACGAGTATTGTCAATTCGGGCAGTTTC---ATTAGC-----AAAAAAAATTCTTTTTCTTTT---TCAAAA---  
-----AAAGAAAAT---  
GAAAGATTATCCTTATTTCATATATAAATCTTATGTATATGAATGGGAATCCATATTTCTTTTTATCCGTAAACAATCTTC  
T---CATTTACGATCAATATCCTGGGAAGCCCTTCTTGAACGAGTCCATTTCTATGGGAAAATAGAACAT-----  
-----CTTGTAGTA-----GTG-----CTT---TGT---AATGATTTTCAGAAGGCT-----  
TTGTGGGTATTCAAAGATTGTTTCATGCATTATGTTAGGTATCAGGGAAAATCCCTTTTTGATTTCAAAGGGAAGTACTGATCT  
TTTGTATGAAGAAATGGAAATATCACTTTATCTATTTATGGCAATGTAATTTTCACTTGTGGTCTCAACCGCACAGGATCC  
ATATAAACCAATTA-----GATAATCGTTCCCTTTTCAATTTTTGGGTTATGCT-----  
TCAAGTGTACGAATAAATCTTTCCGTGGTAAAAAGTCAAATCTAGAGAATTCATTTCTAATGGAGACTTCCGTTAAGAA  
ATTCGAAACCACAGTCCCAATTTTCTCTCATTGGTTTATTGTCAAAGAAAAATTTTGTAAATCTATCGGGGCATCCCA  
CTAGTAAGGCAATTTGGGCGGATTTCGTGAGATTCTGATATTATGGAACGATTTGGGCGCGTATGCAGAAATCTTTCTCAT  
TATTACAGTGGA---  
TGTTCAAAAAACAAATTTTGTATCGAATCAAGTATATACTTCGACTTTCTTGTGCTAGAACTTTGGCTCGTAAACATAA  
AAGTACGGTA---CGCGTCTTTCTG-----AAAAGATTAGGTTCCGGGA---TTTTTGAAGGAATTCCTTGCCGAA-  
-----GAGGAACAAGTTCTTTTCAATTTTCTTCCA-----AGATCC---TACCCTACTTCGTATAGG-----  
TCAAAATAAGATAAAGAACGGATTTGGTATTTGGATATTACCCATACAAAT-----GACTTGGCCAATCATGAA-----  
-----ATGATAATTGAT-----ACGACAAAAGTA---CAA---GCT-----  
ATCAATTCCTTTTTCCAGATCGGAATCTTTA-----  
AAGGAGGTCATAGGGCTCATATGGATGCTTGTCCCTATTTTACTCTTGTATTGGCAATAACAATAGGAGTACTCGTGAT  
CGTGTGGCTAGAAAGGCAAATCTCCGCGGGGATACAACAACGATTGGTCTGAATATGCCGGTCCCCTGGGAATTCCTC  
AAGCTATAGCGGACGGAACGAAACTACTTTTTCAAAGAGGATATCCTCCCATCTAGGGGGATATTCGTTTATTTCAGCATC  
GGGCCGTCTATAGCAGTCATATCCATAATACTAAGTTATTAGTAATTCCTTTTATGTTATCACCTTGTCTAGCTGATCT  
TGGTATAGGTGTTTTTTTTATGGATTGCCGTTTCTAGTATAGCTCCTATTGGGCTTCTTATGTCAGGATATGGATCAAATA  
ATAAGTATTCCTTTTTCAGGTGGTCTACGAGCTGCTGCTCAATCAATTAGTTATGAAATACCATTAACTCTA---  
TGCGTATTATCAATATCTCTATTATCTAACAGTTTAAGTACAATTGATATTGTTGAAGTACAATCCAAATATGGAATTTG  
GGGATGGAATCTTTGGCGTCAACCCGTAGGGTTTATAGTTTTTCTAATTTTCATCCCTAGCAGAATGTGAAAGATTGCCCT  
TTGATTTACCAGAGGCAGAAGAAGAATTAGTTGCAGGTTATCAAACCGAATACTCCGGTATCAAATTTGGTTTTATTTTAT  
GTTGCTTCTTACCTAAATCTACTAGTTTCTTCATTATTTGTAACAGTTCTGTACTTTGGGGTTGGAATCTTTCT---

ATTCCGTACACATCTATTTTTGGACTTTTTGGA-----  
ATAAATCAAACCAGCGGAGTTTTTGGAAACAACAATGGGTATGTTTATTACACTAGCCAAAACCTTATTTATTCCTCTTCAT  
TTCGGTTGCAACAAGATGGACTTTGCCTAGAATGAGAATGGATCAACTATTAATCTCGGATGGAAATTTCTTTTGCCTA  
TTTCTTTAGGTAATTTATTATTGACAACCTCTTTCCAACCTCTTTTCGCTGTAA-----

ATGATCTGGCATGTACAGAATGAAAACCTTCATTCTCGATTCTACGAGAATTTTTATGAAAGCGTTTCATTTGCTTCTATT  
CCATGGAAGTTTCATTTTCCCAGAATGTATCCTCATTTTTTGGCCTAATTCTTCTTCTGATGATCGATTCAACCTCT----

GATCAAAAAGATATACCTTGGTTATATTTTCATCTCTTCGACAAGTTTTAGTAATGAGCATAACGGCCCTATTGTTCCGATG  
GAGAGAAGAACCTATGATTAGCTTTTCGGGAAATTTCCAACGAACAATTTCAACGAAATCTTTCAATTTCTTATTTTAC  
TATGTTCAACTCTATGTATTTCTCTATCCGTAGAGTACATTGAATGTACAGAAATGGCTATAACAGAGTTTTCTGTTATTC  
GTATTAACAGCCACTCTAGGAGGAATGTTTTTATGTGGTGCTAACGATTTAATAACTATCTTTGTAGCTCCAGAATGTTT  
CAGTTTATGCTCCTACCTATTATCTGGATATACCAAGAGAGATGTACGGTCTAATGAGGCTACTACGAAATATTTACTCA  
TGGGTGGGGCAAGCTCTTCTATTCTGGTTCATGGTTTTCTTGGCTATATGGTTCATCCGGGGGAGAGATCGAGCTTCAA  
GAAATAGTGAATGGTCTTATCAATACACAAATGTACAACCTCCCAGGAATTTCAATTGCGCTTATATTCATCACTGTAGG  
AATTGGGTTCAAGCTTTCCCAGCCCCTTTTCATCAATGGACTCCTGACGTATACGAAGGATCTCCCCTCCAGTCGTTG  
CTTTTCTTTCTGTTACTTCGAAAGTAGCTGCCTCAGCTTCAGCCACTCGAATTTTCGATATTCCTTTTTTATTTCTCATCA  
AACGAATGGCATCTTCTTCTGGAAATCCTAGCTATTCTTAGCATGATATTGGGGAAT

Platanus

TTATTGGTCTCATGGTATATCTCAGTATAGAGGATGATACCAGAGATCTGTATTTGTTTATAAACTCTCCCAGCGGATGG  
GTAATACCCGGAATAGCTATTTATGATACTATGCAA---

TTTGTGCCACCAGATGTACATACAATATGCATGGGATTAGCAGCTTCAATGGGATCTTTTATCCTGGTCCGAGGAGAAAT  
TACCAAACGTCTAGCATTCCCTCACGCC---AGGGTAATGATCCACCAACCTGCTAGTTCTTTT---

TATGAGGCACAAACAGGAGAATTTATCCTGGAAGCGGAAGAGCTACTTAAACTTCGCGAAACCCCTCACAAGGGTTTATGT  
ACAAAGAACGGGCAACCCCTTATGGGTTGTATCCGAA---

GACATGGAAAGGGATGTTTTTATGTGCAACAGAAGCCCAAGCTCATGGAATTGTTGATCTTGTAGCGGTTCGAAAATAG  
CGGGGATTTTCAG-----ATG---AAAGAA-----CAAAAA-----

-----TGGATTCAT---GAAGGTTTAACTACTGAATCG---CTTCCCAATGGT-----

ATGTTCCGGGTTTCGTTTATGATAATGAAGATCTGATTCTAGGTTATGTTTTAGGAAAG-----

ATCCGACGTAGTTTTATACGGATACTACCAGGA-----

GATAGGGTCAAAATCGAAGTAAGTCGTTATGATTCAACCAGAGGACGTATCATTATAGACTCCGC-----  
-----AGCAAAGATTTCGAACGATTAG-----

-----ATGGAA-----GAATTACAAGGA-----TATTTAGAA-----

ATAGATAGATCTCGGCAACAAGACTTC-----

CTATATCCACTTCTCTTTTCCAGGAGTATATTTATGCACTTGCTCATGATCATAGTTTA-----AATAGA-----  
-TCG-----ATTCTTTATGAACCCATGGAAAAT---TTAGGTTAT-----

GATAATAAATCCAGTTCACTAATTGTGAAACGTTTTCACTACTCGAATGTATCAA-----

CAGAATCATTAAATTTTTCGGCTAATGAT-----TCTAATCAAAATAAATTTGTTGGGCACAAC-----AAAAAT--  
-----TTGGATTCTCAAACAATATCAGAGGGGTTTGAATCATTGTGGAAATTCATTCTCCCTGCGATTA---

GTATCTTCCCTA-----GAAGGGCTAGAAGGGAAAGGAAAAGAAATAGTAAAATCTCGT-----AATTTACGA--  
-----

TCAATTCATTCAATATTTTCTTTTTTAGAGGACAAATTATCACATTTAAATTATGTGTCAGATATACTAATACCCCATCC  
CATCCATCCGAAATCTTAGTTCAAGTCCTTCGCAGTTGGGTACAAGATGCCCTTCTTTGCATTTATTGCGACTCTTTC  
TCCACGAATATCGTAATTGGACTAGTCTT---ATTACT-----CCAAAGAAATCCATTTCCATT---TTTTCA---  
-----AAAGAGAAT---

CAAAGATTCTTTTTGTTTCTATATAATTTTCATATATGTGAATGCGAATCCATATTCGTTTTTCTCCGTAAACAATCTTC  
T---CATTTACGATCAACATCTTTTAGAGCCCTTCTTGAGCGAACACATTTCTATGGAAAAATGGAACAT-----

-----TTTGTAGTA-----GTG-----TTT---CGT---AATAATTTTCAAACCATC-----

CTATGGTTAGTTAAGGATCCTTTTCATGCATTATGTGAGATATCAAGGAAAATCCTTTTTGGCTTCAAAGGGGACTCCTCT  
TTTAATGAATAAATGGAATATTATCTTGTCAATTTTTGGCAATATTATTTTTATTTGTGGTCTCAACCGAGTAGGATCC  
ATATAAACCAATTA-----TCCAATCATTCCCTCGACTTTCTGGGTTATCTT-----

TCAAGTGTACGACTAAATCCTTCAGTGGTAAGTAGTCAAATGCTAGAAAATTTATATCTAATGGATATTGCTATTAAGAA  
GTTTCGATAACCATAATCCCGATTATTCCTCTGATTGGATCATTGGCTAAAGCGAAAATTTGTAACGTATCAGGGCATCCCG  
TTAGTAAGCCGGTCCGGGCCGATTTCATCCGATTCTGATATTATCGATCGATTTGGGCGGATATGCAAAAATCTTTCTCAT  
TATCACAGTGGG---

TCCTCAAAAAAAGAGTTTGTATCGAATAAAGTATATACTTCGACTTTTCGTGTGCTAGAACTTTAGCTCGTAAACATAA

AAGTACTGTA---CGTGCTTTTTTTG-----AAAAGATTAGGTTCCGGAA---TTATTGGAAGAATTCTTTACGGAG-  
-----GAGGAACAAGTTCTTTCTTTGATCTTCCCA-----AGAACC---TCTTCCCCTTCGCGGAGA-----  
TTATAT-----AGAAAACAGATTTGGTATTTGGATATTATTTCGTATCAAT-----GATTTGGCCAATCATGAATGA--

-----ATGATAATTGAT-----ACGACAGAAGTA---CAA---GCT-----

ATCAATTCTTTTTCCAGATCAGAATCCTTA-----

AAAGAGGCCTATGGGCTCATATGGCTACTTGTCCCTATTTTTACTCCTGTATCGGGAATCACAATAGGAGTACTAGTTAT  
TGTGTGGTTAGAGAGAGAAAATATCTGCAGGGATACAACAACGTATTGGGCCTGAATACGCCGGCCCTTTGGGAATTCTTC  
AAGCCCTAGCGGATGGGACCAAACACTACTTTTCAAAGAGGATCTTCTTCCATCTAGAGGAGATACTCGTTTATTCAGTATC  
GGACCATCTATAGCGATCATATCAATTCTACTAAGTTATTAGTAATTCCTTTGGCTATCGCCTTGTCTAGTGTATCT  
CAGTATAGGTGTTTTTTTTATGGATTGCCATTTCAAGTATTGCTCCTATTGGACTTCTTATGTCCAGGATATGGATCGAATA  
ATAAATATTCCTTTTCGGGTGGTCTACGAGCTGCTCAATCGATTAGTTATGAAATACCATTAACCTCTA---  
TGTGTCTTATCAATATCTACTATCTAACAGTTTTAAGTACAGTTGATATAGTTGAGGCGCAGTCCAAATATGGTTTTTG  
GGGGTGGAAATTTGTGGCGGCAACCTATAGGGTTGCGGTTTTTCTAATTTCTTCTCTAGCAGAATGTGAGAGATTACCTT  
TTGATTTACCAGAAGCAGAGGAAGAATTAGTAGCAGGTTATCAAACCGAATATTAGGATCAAAATTTGGTCTATTTTAC  
GTTGCTTCTACTAAATCTACTAGTTTCTTCAATTATTTGTAACAGTTCTTTATTTGGGCGGTTGGAATCTTTCT---  
ATTCCGTACATATTCATTCTGAACTTTTCGAA-----

ATAAATAAAGTGAGTGGGGTCTTTGGAACGACAATTGGTATCTTTATTACACTAGCTAAAGCTTATTTGTTCTGTTCAT  
TTCTATCACAACAAGATGGACTTTACCCAGGATGAGAATGGACCAACTATTAATCTTGGATGGAAATTTCTTTTACCTA  
TTTCTCTAGGCAATCTATTATTGACAACCTTCTTCCAACCTTTTTTCACTCTAA-----

ATGATCTGGCATGTACAGAATGAAAACCTTCAATCTCGATTCTACGAGAATTTTTATGAAAGCGTTTCATTTGCTTCTCTT  
CCATGGAAGTTTCATTTTCCCAGAATGTATCCTAATTTTTGGCCTAATCTTCTTCTGATGATCGATTCAACCTCT----

GATCAAAAAGATATACCTTGGTTATATTTTCTCTTCAACAAGTTTAGTAATGAGCATAACGGCCCTATTGTTCCGATG  
GAGAGAAGAACCTATGATTAGCTTTTCGGGAAATTTCCAAACGAACAATTTCAACGAAATCTTTCAATTTCTTATTTTAC  
TATGTTCAACTCTATGTATTCCTCTATCCGTAGAGTACATTGAATGTACAGAAAATGGCTATAACAGAGTTTCTGTTATTC  
GTATTAACAGTACTCTAGGAGGAATGTTTTTATGTGGTGCTAACGATTTAATAACTATCTTTGTAGCTCCAGAATGTTT  
CAGTTTTATGCTCCTACCTATTATCTGGATATACCAAGAGAGATGTACGGTCTAATGAGGCTACTACGAAATATTTACTCA  
TGGGTGGGGCAAGCTCTTCTATTCTGGTTTCATGGTTTTCTTGGCTATATGGTTTCATCCGGGGGAGAGATCGAGCTTCAA  
GAAATAGTGAATGGTCTTATCAATACACAAATGTATAACTCCCCAGGAATTTCAATTGCACTTATATTTCATCACTGTAGG  
AATTGGGTTCAAGCTTTCCCCAGCCCTTCTCATCAATGGACTCCTGACGTATACGAAGGATCTCCCCTCCAGTCGTTG  
CTTTTCTTTCTGTTACTTTCGAAAGTAGCTGCTTCAGCTTCAGCCACTCGAATTTTCGATATTCCTTTTTATTTCTCATCA  
AACGAATGGCATCTTCTTCTGGAAATCCTAGCTATTCTTAGCATGATATTGGGGAAT

Populus

TTATCGGTCTTATGGTATATCTCAGTACAGAAAGTGAGATCAAAGATTTGTATTTGTTTATCAACTCTCCTGGCGGATGG  
GTAATACCCGGAATAGCTATTTATGATACTATGCAA---

TTTGTGCGACCAGATGTACAAACAGTATGCATGGGATTAGCCGCTTCAATGGGATCTTTTATCCTGGTCCGAGGAAAAAT  
TACCAAACGTCTAGCATTCCCTCACGCT---AGGGTAATGATCCATCAACCTTTTGTGCTTTT---

TATGAAGCACAAATAGGAGAATTTGTCTGGAAGCGGAAGAAGTACTGAAACTGCGCGAAATCCTCACAAGGGTTTATGC  
ACAAAGAACAGGCAAACCTTATGGGTTGTATCTGAA---

GACATGGAAAGGGATGTTTTTATGTCAGCAGCAGAAGCCCAAGTTCATGGAATTGTTGATCTTGTAGCAGTTGCA-----

-----ATGAAAATAGAG-----AAATCTCAAAGA-----AATTTAGAA-----

ATAGATAGATCTCGAAAAAATGACTTC-----

CTATACCCACTTATCTTTTCGGGAGTATATTTATACATTTGCTCATGATCGTGACTTA-----AATAGA-----

-TCT-----ATTTTG-----TTAGAAAAT---GTAGGTTAT-----

GACAATAAATATAGTTTACTAATCGTAAAACGTTTTAATTACTCGAATGTATCAA-----

CAGAATCATTTGATTATTTCTGCTAATGAT-----TCTAACCAAAAATACATTTTTTTAGGTATAAC-----AAAAAT---

-----TTGATTTTTCAAATGATATCGGAGGGGTTGCGATTATTGTGGAAATTCATTTTCTTACGATTA---

GTATCCTCTTTA-----GAAAGC-----TCAGAAATAGTAAAATCTCAT-----AATTTACGA-----



TCAATTCATTCAATATTTTCCTTTTTTAGAGGGCAAATTTCCACATTTAAATTATCTGTCTAGAGGGACTAATACCGTACCC  
CATCCATCTAGAAAAATTGGTTCAAATCCTTCGCTATTGGGTGAAAGATCCCTCCTCTTTGCATTTATTACGACTCTTTC  
TTCACGAGTATTGGAATTTGAACAGTCTT---ATTATT-----CCAAAGAAATCTATTTCTTT---TTTGTA---  
-----AAAAAGAAT---  
CAAAGATTCTTCTTGTTCCTTATATAATTCTCATGTATATGAATACGAGTCCGTTTTCTTTTTCTTTTGTAAGCAATCCTT  
T---CATTTCCGATTAACATTTTATCAGGTCTTTCTTGAGCGAATATATTTCTATGGAAAAATAGAACAT-----  
-----TTTGTAAGAA-----GTC-----TTT---ACT---AAGGATTGGGGGGACAGC-----  
CTATGCTTGCTCAAGGATCCTTTTCATACATTATATTAGATATCAAGGAAAAATCCATTTTTGTCTCAAAGGATACGCCTCT  
TCTGATGAAAAAATGGAAATATTACCTTGTCAATTTATGTCAATGTCAATTTTGTATGTGTGCTTTCAACCCCAAAAGATCC  
ATATAAACCCATTTTCATTATACAAGCATTCTTTCGCCTTATTAGGTATCTTTCAAGTTCAAGTGTACGACTAAACCTT  
TCAGTGGTACGGAGTCAAATGCTAGAAAAATGCATTTCTAATTGGATAATATTATGAATAAACTCGATACAACAGTTTCAAT  
TATTCTTTTGGATTGGATCATTAGCAAAAAATGAAATTTTGTAAACGCAGTAGGACATCCCATTTAGTAAACCGACTGGGCCG  
ATTTTTCGGATTCTGATATTATCGACCGATTTGTCCGTATATGCAGAAATCTTTCTCATTATTATAGCGGA---  
TCCTCAAGAAAAAAGAGTTTGTATCGAATAAAATATATACTTTCGACTTTCTTGTGTTAAAACGTTGGCTCGTAAACACAA  
AAGTACTGTA---CGGATTTTTTTG-----AAAAGATTAGGTTTCAGAA---TTATTGGAAGAGTTTTTTTACGGAG-  
-----GAAGAGCAAATCTTTTTTTTGTATCTTTCCA-----AGAGCT---TCTTCTATTTTCAAAAAG-----  
TTATAT-----AGGGGGCGGGTTTTGGTATTTGGATATTATTTGTATCAAC-----GAGCTGTCCAATCATGAA-----  
-----  
-----ATGATAATTGAT-----ACAACAACAGTA---CAA---GCT-----  
ATCAATTCCTTTTTCCAGATTGAAATCCTTA-----  
AACGAAGTCTATGGAATTATATGGATGCTTGTCCCTATTTTACTCTTGTATTGGGAATCACGATAGGCATATTAGTAAT  
TGTGTGGTTAGAAAAGAGAAATTTCTGCAGGGATACAACAACGTATTGGACCTGAATATGCCGGTCTTTTGGAGTTCTTC  
AAGCTCTAGCGGATGGAACAAAACACTACTTTTTCAAAGAAAATCTTTTTCCATCTAGAGGAGATACTCGTTTATTCAGTATC  
GGACCATCCATAGCAGTCATATCAACGCTATTAAGCTATTCAGTAATTCCTTTTGGCTATCACTTTGTTTTAGCAGATCT  
AAATATCGGGCTCTTTTTATGGATTGCCATTTCAAGTATTGCTCCCATTGGACTTCTTATGTCAAGGATATGGATCAAATA  
ATAAATATTCCTTTTTAGGTGGTCTACGAGCTGCCGCTCAATCGATTAGTTATGAAATACCATTAACCTCTC---  
TGTGTATTATCCATATCTCTATTATCTAACAGTTCAAGTACAGTTGATATAGTTGAGGCACAATCAAAAATATGGTTTTGG  
GGGATGGAATTTGTGGCGTCAACCTATAGGATTTATCATTTTTTTCAATTTCTTCCCTAGCAGAATGTGAGAGATTACCTT  
TTGATTTACCAGAAGCAGAAGAAGATTAGTAGCAGTTTATCAAACCGAATATTCCGGGTATCAAATTTGGTTTTATTTTAT  
GTTGCTTCTTCTAAACTTATTAGTCTCTTCAATTTTGTAGCAGTTCTTTACTTGGGCGGTTGGAATATCTCT---  
ATTCCGTACATATCCGTTCCGGAGTTTTTTGATTTTGAA-----  
ATAAATAAAGTAGGTAGAGTCTTTGGAACAACAATGGGTATTCTTATTACATTGGTTAAAACCTTATTTGTTCTTGTTCAT  
TCCTATCACAACAAGATGGACTTTACCTAGACTAAGAATGGACCAACTATTAATCTTGGATGGAAATTTCTTTTACCTA  
TTTCTCTTGGCAATCTATTATTAACAACCTCTTCCCAACTCTTTTCACTATA-----  
-----  
ATGATCTGGCATGTACAGAATGAAAACCTTCATTCTCGATTCTACGAGAATTTTTATGAAAGCCTTTTCATTTGCTTCTCTT  
CGATGGAAGTTTTATTTTCCCAGAATGTATCCTAATTTTTGGCCTAATCTTCTTCTGATGATCGATTCAACCTCT----  
--  
GATCAAAAAGATATGCCTTGGTTATATTTTCATCTCTTCAACAAGTTTGTAGTAATGAGTATAACGGCCCTATTGTTCCGATG  
GAGAGAAGAACCTATGATTAGCTTTTCCGGAAATTTCCAAACGAACAATTTCAACGAAATCTTTCAATTTCTTATTTTAC  
TATGTTCAACTCTATGTATTCCTCTATCCGTAGAGTACATTGAATGTACAGAAATGGCTATAACAGAGTTTCTCTTATTC  
GTATTAACAGCTACTCTAGGAGGAATGTTTTTATGCGGTGCTAACGATTTAATAACTATCTTTGTAGCTCCAGAATGTTT  
CAGTTTATGCTCATACCTATTATCTGGATATACCAAGAAAGATGTACGGTCTAATGAGGCTACTACGAAATATTTACTCA  
TGGGTGGGGCAAGCTCTTCTATTCTGGTTTCATGGTTTTCTTCTTGGCTATATGGTTTCGTCCGGGGGAGAGATCGAGCTTCAA  
GAAATAGTGAATGGTCTTATCAATACACAAATGTATAACTCCCCAGGAATTTCAATTGCGCTTATATTCATCACTGTAGG  
AATTGGGTTCAAGCTTTCCCCAGCCCCTTCTCATCAATGGACTCCTGACGTATACGAAGGATCTCCCACTCCAGTCGTTG  
CTTTTCTTTCTGTTACTTCGAAAGTAGCTGCTTCAGCTTCAGCCACTCGAATTTTCGATATTTCTTTTTATTTCTCATCA  
AACGAATGGCATCTTCTTCTGAAATCCTAGCTATTCTGAGCATGATAGTGGGGAAT  
Ranunculus  
TTATCGGTCTGATGGTATATCTCAGTCTAGAGGACGAAACCCGGGATCTTTTTTTGTTTATAAACTCGCCCCGGCGGGTGG  
GTAGTCCCCGGAGTAGCCATTTATGATACTATGCAA---  
TTTGTGCCACCAGATGTACATACAATATGCATGGGATTAGCCGCTTCAATGGGATCTTTCTCCTGGTTCGGAGGAGAAAT  
TACCAAACGTATAGCATTCCCTCAGCT---AGGGTAATGATCCACCAACCTGCTAGTTCTTTT---  
TATGAGGCACAAACAGGAGAATTTGTCCTAGAAGCGGAAGAATTTCTGAAACTCCGCGAAACCCCTCACAAGGGTTTATGT  
ACAAAGAACGGGCAACCCATTGTGGGTTGTATCCGAA---  
GATATGGAAAGGGATGTTTTTATGTCTAGCAACAGAAGCCCAAGCTCATGGAATTGTTGATTTTGTAGCGGTCGAA-----  
-----ATAT--AAAGAA-----CAAAA-----

-----CGGATTCAT---AAAGGTTTAAATTACTTAAATCA---TTTCCCAATGTT-----  
ATGTTTCGGGTTTTGTTTCGATGATGAGGATATGATTCTAGGTTATTTTTTCAGGAAGG-  
CTATAACGTAACGCAGTTTTAGATCTATACTACCAAGGGCAAACGATAGAATAAAAAATGGAAGTAATTGGTTATGATTTA  
ACCAGGGGACGCATAATTTATAAACTCTAC-----  
----AACAAAGATTCAAACGATTAATTT-----  
-----ATGGAG-----  
GAATTACAAAGA-----TATTTAAAA-----ATGGATAGATCTCGAGAACGAGACTTC-----  
CTATATTCACCTTCTCTTTTCAGGAATATATTTATGCACTTGCTCATGATTTTGGGTTA-----ACTAAA-----  
-TCG-----ATTCCTTATGAGTCTATGCAAATT---TTAAGTTAT-----  
GACAATAAATATAGTTCACTAATTGTTAAACGTTTAAATTATTCGAATGTATCAA-----  
CAGAAGCATTGATTATTTTGGATAATGAT-----TCGAAAAACAAAAATTTCTTGGGCATAAT-----AAAAAT--  
-----TTGTATTCTCAAATGATATCAGAGGGGTTTGTCTGTCATTGTAGAAAATCCATTTGCATTGCGATTA---  
GTATCCTCCTAC-----CAAGGT-----AAAGAAATAGAAAAATCGATT-----AATTTAGGA--  
-----  
TCCATTCACTTACATTTCCATTTTTAGAGGATAAATTTGTACATTTAAATCATGTATTAATATACTAATACCCTATCC  
GATCCATTTTGAACATAAGTTCAAACCTTCGTTGTTGGATACAAGATGCCTCCTTTTTGCACCTATTGAGATTCTTTC  
TCTATGAGTATCATAATTGGAATAGTTTT---ACTACT-----CAAAAAATGAAACAGAACTCTCTT---TTTTTA---  
-----AAAGAGAAT---  
CGAAGATTCTTCTTGTTCCTATATAATTTTCATGTATATGAATCGGAATCCATATTTCTTTTTCTACGTAAAAAATCTTA  
T---CATTTACGATCAACATCTTCTATAGCTTTTCTTGATCGAACACATTTTTTTGGAAAAATAGAACAT-----  
-----TTGAAAGTC-----GTT-----TTT---CGT---AATGATTTTTCATACCATG-----  
CTATGGTTGTTCAAGGATCCCTTCATGCACTATTTCCGATATCAAGGAAAATCAATTATGTCTTCAAAGGAACTCCTCT  
TCTGATGAAGAAATGGAAATATTACCTTGTAACCTTATGGGAATGTCATTTTTATTTTTGGTCTCAGCCGAATAGGATTC  
ATATAAACCAATTA-----TCCAATATTTTTCTCAATTTTTTGGGTTATCTT-----  
TCAAGTGTACGACCAAATCCTTCGGTGGTAAGGAATCAAATGTTAGAAAATGCATTTATTATAGATATTTCTAGAAATAA  
GTTGAGTACTTTAGTTCCAATTTCTTTGATTGGATCATTAGCAAAAAGCGAAAATTTTGTAACTTATCTGGGCAGCCCA  
TCAGTAAGCCGGCTTGGACCGATTCACTAGATTCTGATATTATCGATAGATTTGGCCGGATATGCAGAAAATGTTTCTCAT  
TATTATAGCGGA---  
TCCTCAAAAAAAAACCTTTGTATCGAATAAAGTATATACTTAGACTTTTCATGTGCTAGAACTTTGGCACGTAAACACAA  
AAGTACTGTA---CGTTCTTTTTTA-----AAAAGATTGGGTTTCGGAA---TTTTTGGAGAATTCTTATAGAG-  
-----GAAGAACAGGTTCTTTCTTTTATTCTCCA-----AAAATT---TCTTCTTCTTCACAGAGG-----  
TTATCT-----AAAGAAAGGATTTGGTATTTTTGATATTATTCGTATTAAT-----GACCTG-----  
-----  
-----ATGATAATTGAT-----ACGACAAAATA---CAA---GCT-----  
ATCAATTCTTTTTACAGATCGGAATCCTTA-----  
AAAGAAGTTTACGGACTCGTATGGTTACTTATTTCCATTTTTATTCTTGTATTGGGAATCGTAATAGGGGTGCTAGTAAT  
TGTGTGGTTGGAAAGGCAAATATCCGCGGGGGTGAACAACGTATTGGGCCGAATACGCGGGTCTTTGGGAATCTTC  
AAGCTCTAGCAGACGGTACCAAATTACTTTTTCAAAGAAGATCTTCTCCCATCTAGAGGAGATATTTATTTATTCAGTATC  
GGGCCATCTATAGCGGTGATAGCCATTTTACTAAGTTATTTAGTAATTCCTTTTGGCTATCACCTTGTTTTAGCCGATCT  
CAGTATAGGGGTTTTTTTTATGGATTGCTATTTCCAGTATTGCTCCATTGGACTTCTTATGTCAGGATATGGATCAAATA  
ATAAATATTCCTTTTTTAGGTGGTCTACGAGCTGCTGCTCAATCAATTAGTTATGAAATACCATTAACCTCA---  
TGTGTGTTATCAATATCTCTACTATCTAACAGTTCAAGTACAGTTGATATAGTTGAGGCGCAGGCAAAATATGGTTTTTG  
GGGTTGGAATCTGTGGCGTCAACCTATAGGGTTACTGTTTTTTTTTATTCTTCACTAGCAGAGTGCGAAAGATTACCTT  
TTGATTTACCAGAAGCAGAGGAAGAATTAGTAGCGGGTATCAAACCTGAATATTCCGGTATAAAATTTGGTTTTATTTAT  
GTTGCTTCTATCTAAATCTCCTAGTTTCTTCATTATTTGTAACCGTTCTTTACTTGGGAGGCTGGAATCTATCT---  
ATTCCACATATATTAATTCCTGAGCTTTTCGGA-----  
ATAAATGAAATGGGTGGGTTTTTGGAAATGACAATTGGTATCTTTATTACATTAGCTAAAGCTTATTTGTTCTTGTTCAT  
TTCTATCACAACAAGATGGACGTTACCGAGGATGAGAATGGACCAACTATTAATCTTGGATGGAAATTTCTTTTACCTA  
TCTCTTTAGGTAATCTATTATTGACAACCTTCTTTCCAACCTTTTTTCCCTGTAA-----  
-----  
ACGATCTGGCATGTACAGAATGAAAACCTTCAATTCTCGATTCTACGAGAATTTTTATGAAAGCGTTTCATTTGCTTCTCTT  
CCATGGAAGTTTTATTTTCCAGAATGTATCCTAATTTTTTGGCCTGATTCTTCTTCTGATGATCGATTTAACCTCT----  
--  
GATCAAAAAGATATACCTTGGTTATATTTTCATCTCTTCAACAAGTTTAGTAATGAGCATAGCGGCCCTATTGTTCCGATG  
GAGAGAAGAACCTATGATTAGCTTTTCGGGAAATTTCAAACGAACAATTTCAACGAAATCTTTCAATTTCTTATTTTAC  
TATGTTCAACTCTATGTATTCCTCTATCCGTAGAGTACATTGAGTGTACAGAAATGGCTATAACAGAGTTTCTGTTATTC  
GTATTAACAGCTACTCTAGGAGGAATGTTTTTATGTGGTGCTAACGATTTAATAACTATCTTTGTAGCTCCAGAATGTTT

CAGTTTATGCTCCTACCTATTATCTGGATATACCAAGAGAGATGTACGGTCTAATGAGGCTACTATGAAATATTTACTCA  
TGGGTGGGGCAAGCTCTTCTATTCTGGTTCATGGTTTCTCTTGGCTATATGGTTCATCCGGGGGAGAGATCGAGCTTCAA  
GAAATAGCGAATGGTCTTATCAATACACAAATGTATAACTCCCCAGGAATTTCAATTGCACTTATATTTCATAACTGTAGG  
AATTGGGTTCAAGCTTTCCCTAGCCCCTTCTCATCAATGGACTCCTGACGTATACGAAGGATCTCCCACTCCAGTCGTTG  
CTTTTCTTTCTGTTACTTCGAAAGTAGCTGCTTCAGCTTTAGCCACTAGAATTTTCGATATTCCTTTTTATTTCTCATCA  
AACGAATGGCATCTTCTTCTGGAAATCCTAGCTATTCTTAGCATGATATTGGGGAAAT

Spinacia

TTATTGGTCTTATGGTATATCTCAGTATCGAAGATGATACCAAAGATTTGTATTTGTTTATAAATTCTCCTGGCGGATGG  
GTAATACCAGGAGTAGCTATTTATGATACCATGCAA---  
TTTGTGCGACCAGATGTACATAACAATATGCATGGGGTTAGCTGCTTCAATGGGATCTTTTATCCTGGTCGGAGGAGAAAT  
TACCAAACGCTTTAGCATTCCCTCACGCT---AGGGTAATGATTTCATCAACCCGCAAGCTCTTTC---  
TATGAAGCCCAACCGGGAGAGTTTTCTCCTGGAAGCGGAAGAACTTTTGAAATTGCGCGAAACCCCTCACAAAGGTTTATGG  
ACAAAGAACGGGCAAACCCCTTATGGGTTGTATCCGAA---  
GATATGGAAAGGGATGTTTTTATGTCAGCAACAGAAGCCCAAGCTCATGGAATTATTGATCTTGTGCGGGTCGAA-----

ATGTTCTGGGTTTCGTTTATGATAATGAAGATCCGATTCTGGGTTATGTTTCAGGACGG-----  
ATACGACGTAGTTCTATACGAATTCTACCGGGA-----  
GATAGAGTTAAGATTGAAGTAAGCCGTTATGATTCAACTAGAGGTCGTATAATTTATAGACTGCGC-----  
-----ACAAGGATTTCGAACGATTAA-----

-----ATGGAA-----GAATTCCAAAGA-----CATATAGAA-----  
CTAGACAGGTCTTGGCAACATAATTTT-----  
TTATATCCACTTATCTTTCAGGAATATATTTATGCATTTGCATATGATCATGGTTTA-----AATAAA-----  
-TCG-----ATTTTG-----TTGGAAAAT---TCAGGC-----  
AACAGTAAATACAGTTTACTGCTTGTAAAACGTTTAAATTACTCGAATGTATCAA-----  
CAGAATCATTGATTCTTTCTGCTAATGAT-----TCGAATCAAAATGTAATTTTGGGGCACAAGCACAAAAAGAAT--  
-----TTGTATTACAAATGATAACAGAAGGGTTTGCCGTCAATTGTGGAAGTTCCATTTTCCCTACTATTA---  
ATATCTTCCCTA-----GGGGAA-----AAAGAAATAGTAAAATCTCAT-----AATTTGCGA--  
-----

TCAATTCATTCAATATTTCCCTTTTTAGAGGACAAATTATTACATTTAAATTATGTGTTAGATATATTAATAACTTACCC  
CGCCCATCTCGAAATCTTGGTTCAAACCTTTCGCTACTGGGTGAAAGATGCCTCTTCTTTGCATTTATTACGATTTTTTC  
TTTATGAGTATCGTAATTTGAATAGTCTT---ATTACT-----CCAAAGGAATTGATTTCTTTT---TTGAAA---  
-----AAAAGGAAT---

CAAAGATTATTCTTATTCCCTATATAATTTGCATGTATGTGAATACGAATCCCTTTTTGTTTTTCTCTGCAACCAATCCTC  
T---TATTTACGACCAACATCTTTTGGAGCCCTTATTGAACGAATCTATTTCTGCGGAAAGCTAAAATAT-----  
-----CTAGTAAAA-----GTT-----TTT---ACT---AAGGATTTTGGAGTTATC-----

CTATGGATTTTTCAGAGAACCTTTCCACATTATGTTAGGTATCAAGGAAAATCAATTCTGGCTTCAAAGGGGACATCTCT  
TCTGATGCATAAATGGAAATATTACCTTATCTATTTTCGGGCAATGTCATTTTTCTGTGTGGTCTCAACCAAAAAGACTCT  
ATATCAATCGATTA-----TCAAACCATTCCCTAGACTTTTATGGGTTTTCTT-----

TCAAGGGTGCAGTCAATTCTTTCAGTAATACGGAGTCAAATGTTAAAAAATTCATTTCTAATAGAGAATATTAGTAAGAA  
GTTTCGATACCGTAGTTCCAATTATTCCTTTGGTTGGGTGCTATTGGCTAAAGCGAAATTTTGTAAATGATTAGGGCATCCCA  
TTAGTAAGTCGGTCTGGACCGATTTATCAGATTCTGATATTCTTGATCGATTTGGACGTATATGTAGAAATATTTCTCAT  
TATTATAGCGGC---

TCTTCAAGAAAAAAGTGTGATCGAATAAAGTATATACTTCGACTTTCTTGTGCTAGAACTTTGTCTCGTAAACACAA  
AAGTACTGTA---CGTGCTTTTTTG-----AAAAGATTAGGTTTCAGAA---TTTTTAGAAGAATTTCTTTACAGAG-  
-----GAAGAAAAAGCTCTTTCTTTGATCTTACCA-----AGAGAT---TCTTCTATCTCACGGGGA-----

TTATAT-----AGAGGGCGTATTTGGTATTTGGATATTATTTGTATTTCAT-----AATTTGGCCAATGAT-----  
-----  
-----ATGATAATTGATACAACAACAACAAAAGTA---CAA---GCT-----

ATCAATTCTTTTTCCAGATTGGAATTCTTA-----  
AAAGAGGTTTATGAGACTATATGGATGCTTTTTCCCTATTTTATTCTCGTATTGGGAATTACAATAGGTGTACTAGTAAT  
TGTATGGTTAGAAAGAGAAATATCCGCAAGTATAACAACGATTTGGACCTGAATATGCTGGTCCTTTGGGGATTCTTC  
AAGCTTTAGCGGACGGAACAAAACCTGCTTTTTAAAGAAAACCTTCTTCCATCTAGGGGGGATACATATTTATTTAGTATT  
GGACCTTCTATAGCAGTCATATCGATTCTACTAGGTTACTTAATAATTCCTTTTGGGTCTCGCCTTGTCTAGCCGATCT  
CAGTATTGGTGTTTTTTATGGATCGCTGTTTCAAGCATTGCTCCGATTGGACTTCTTATGTCAGGATATGGATCAAATA  
ATAAATATTCCTTTTTTAGGTGGTCTACGGGCTGCTGCCCAATCAATTAGTTATGAAATACCATTAACCTA---

TGTGTGTTATCCATATCTCTACTATCTAATAGTTCAAGTACAGTTGATATAGTTGAGGCGCAGTCAAAATATGGTTTTTG  
GGGATGGAATTTGTGGCGGCAACCTATAGGATTTATTGTTTTTATAATTTCTTCTCTAGCAGAATGCGAGAGATTGCCTT  
TTGATTTACCAGAAGCAGAAGAAGAAATTAGTAGCAGGTTATCAAACCGAATATTCCGGTATTAATTTGGTTTTATTTAT  
GTTGCGTCTTATTTAAATCTACTAATCTCTTCATTATTTGTAACCGTTCTTTACTTGGGTGGTTGGAATCTCTCT---  
ATTCCATACATATTCATCTCGGAGTTTTTTGAA-----

ATAAATAAAATAGATGGAGTCTTTGGAACAACAATTGGTATTTTCATTACATTAGCTAAAACCTTTTTTGTTCCTTGTTCAT  
TCCTATCACAACAAGATGGACTTTACCTAGACTGAGAATGGACCAATTATTAATCTTGGATGGAAATTTCTTTTACCTA  
TTTCTTTAGGTAATCTATTATTAACAACCTTCTTCCCAACTCTTTTCATTATA-----

ATGATCTGGCATGTACAGAATGAAAACCTTCATTCTCGATTCTACGAGAATTTTTATGAAAGCCTTTCATTTGCTTCTCTT  
CGATGGAAGTTTGATTTTTCCAGAATGTATCCTAATTTTTGGCCTAATTTCTTCTTCTGATGATCGATTCAACCTCT----  
--  
GATCAAAAAGATATACCTTGGTTATATTTTCATCTCTTCAACAAGTTTTAGTAATGAGCATAACAGCCCTGTTGTTCCGATG  
GAGAGAAGAACCTATGATTAGCTTTTTCAGGAAATTTCCAAACGAACAATTTCAACGAAATCTTTCAATTTCTTATTTTAC  
TATGTTCAACTCTATGTATTCCTCTATCCGTAGAGTACATTGAATGTACAGAAATGGCTCTAACAGAGTTTTCTGTTATTC  
ATATTAACAGCTACTCTAGGAGGAATGTTTTTATGCGGTGCTAACGATTTAATAACTATCTTTGTAGCTCCAGAATGTTT  
CAGTTTTATGCTCCTACCTATTATCTGGATATACCAAGAAAGATGTACGGTCTAATGAGGCTACTACGAAATATTTACTCA  
TGGGTGGGGCAAGCTCTTCTATTCTGGTTCATGGTTTTCTTGGCTATATGGTTCATCCGGTGGAGAGATCGAGCTTCAA  
GAAATAGTGAATGGTCTTATCAATACACAAATGTATAACTCCCCGGGAATTTCAATTGCGCTTATATTCATCACTGTAGG  
AATTGGGTTCAAGCTTTCCCGAGCCCTTCTCATCAATGGACTCCTGACGTATACGAAGGATCTCCCACTCCAGTCGTTG  
CTTTTCTTTCTGTTACTTTCGAAAGTAGCTGCTTCAGCTTCAGCCACTCGAATTTTCGATATTCCCTTTTATTTCTCATCA  
AACGAATGGCATCTTCTTCTGGAATCCTAGCTATTCTTAGCATGATATTGGGGAAT

*Triticum*  
TTACAGGTCTCATGGTATATCTGAGTATAGAAGATGGAATTAGTGATATTTTTTGTGTTATAAACTCCCCGGCGGGTGG  
CTAATCTCAGGAATGGCTATTTTTGATACGATGCAA---  
ACGGTGACACCAGATATATATAACAATATGCCTCGGAATAGCCGCCTCCATGGCATCCTTCATTCTGCTTGGAGGAGAACC  
CACCAAGCGTATAGCATTCCCTCACGCG---AGGATTATGCTTCACCAACCTGCTAGTGCTTAT---  
TATCGGGCAAGGACACCAGAATTTTTACTAGAAGTAGAAGATTACACAAAGTTCGCGAAATGATCACAAGGGTTTATGC  
AGTAAGAACAGGCAAGCCTTTTTGGGTTGTATCCGAA---

GACATGGAAGGGATGTTTTTATGTGAGCAGACGAAGCCAAAGCTTATGGACTTGTGATATTGTAGGGGATGAA-----  
-----ATG---ACAGAA-----  
AAAAAAAATAGGAGAGAAAAAAAACCCGAGAGAAGCAAAAGTAACTTTC---GAAGGTTTAGTTACGGAAGCC---  
CTACCCAATGGA-----ATGTTCCGCGTTCGGCTAGAGAATGACACCATCATCTAGGCTATATTTTCAGGAAAG-----  
-ATACGGTCTAGTTCTATACGAATACTGATGGGG-----  
GATAGGGTCAAAATTGAAGTAAGTCGTTATGATTCAAGCAAGGGACGTATAATTTATAGACTTCCCCATAAGGATTTCGAA  
GCGTATCGAAGACTCGAAGGATAGCGAAGATTTGAAGGATAGCGAAGATTTGAAGGATACCAAAGATTCAAAGGATTAGA  
TGCAACACCCTGTTCTGACCATATTGCACTATGTATCATCATTGATAAACCAGAAATGCTTCTCTCTCTGATTCAA  
GTAGAAATACAAATGGAA-----AAATTCGAAGGG-----TATTCAGAA-----

AAACATAAATCTCGTCAACAATACTTC-----  
GTCTACCCACTTCTCTTTCAGGAATATATTTATGCATTTGCCCTGATTATGGATTA-----AATGGT-----  
-TCT-----GAACCTGTGGAAATA---GTTGGTTGT-----  
AATAACAAGAAATTTAGTTCACTACTTGTGAAACGTTAATTATTCGAATGTATCAG-----  
CAGAATTTTTTGGATAACTCGGTTAATCAT-----CCTAACCAAGATCGATTATTGGATTACAAA-----  
AATTATTTTTATTCTGAGTTTTATTCTCAGATTCTATCTGAAGGGTTGCGATCGTTGTGGAAATCCCATTCTCGCTACG  
GGAA---TTATTTTGTCCG-----AAAGAA-----AAAGAAATACCAAAGTTTCAG-----  
AATTTACGC-----

TCTATTCAATCAATATTTCCCTTTTTTGAAGACAAATTTTTGCATTTGGATTATCTATCACATATAGAAATACCCTATCC  
TATCCATTTGGAAATCCTGTTCAACTCCTTCAATACCGTATCCAAGATGTTCCATCCTTGCATTTATTGCGATTTCTTC  
TCAACTACTATTTCGAATTGGAATAGTTTT---ATTACT-----TCAATGAAATCCATTTTTATT---TTCAA---  
-----AAAGAAAAT---

AAAAGACTATTTTCGATTCTATATAACTCTTATGTATCAGAATATGAATTTTTTTTTGTTGTTTCTTCGTAAACAATCTTC  
T---TGCTTACCATTAGCATCTTCTGGAACCTTTCTGGAACGAATCCACTTTTCTAGGAAGATGGAACAT-----  
-----TTTGGGATA-----ATG-----TAC---CCT---GGTTTTTCTCGGAAAACC-----  
CTATGGTTCTTTATGGATCCTCTTATGCATTATGTTTCGATATCAAGGAAAGGCAATTTCTGATCAAAAGGCCTTTTCT  
TTTGAAGAAGAAATGGAATGCTACCTTATCAATTTATGGCAATATTATTTCTGTTTTTGGACTCAGCCGCGAAGAATCC  
ATATAAACCAATTA-----GCAAACTCTTGCTTCGATTTTATGGGGTACCTT-----  
TCAAGTGTACCAAAAAGTTCTTTGTTAGTAAGGAATCAAATGCTGGAGAATTCATTTCTAATAGATACTCGAATGAAAAA

ATTCGATAACCATAGTCCACGCTACTCTCTCATAGGATACTTATCAAAAGCTCAATTTTGTACTGGATCGGGGCATCCTA  
TTAGTAAACCCATTTGGACAGATTTATCAGATTGGGATATTCTTGATCGGTTTTGGTCGGATATGTAGAAATCTTTTTTCAT  
TATCACAGTGGA---

TCTTCAAAAAGAAGACTTTGTATCGACTAAAGTATATACTTCGACTTTTCATGCGCTAGAACTTTAGGTCCTAAACATAA  
AAGCACGGTA---CGAGCTTTTATG-----CAATGGTTGGGTTTCGGTA---TTTTTAGAAGAATTTTTTAGGGAA-  
-----GAAGAGCAAGTTTTTTCTTTTATGTTTCGCC-----AAAACAACCTACTTTTTCTTTCCGGGGA-----  
TCGCAC-----AGTGAGCGTATTTGGTATTTGGATATTCTCCGTATCAAT-----GATCTGGTGAATCCT-----

-----ATGATAATAGAT-----AGGGTAGAGGTA---GAA---ACT-----

ATCAATTCTTTTTGGAAATTGGAATTATTA-----AAAGAAGTCTATGGACTGATATCGATTCTA---  
CCCATTTTGACCCTCTTTTTGGGAATAACAATAGAGGTAAGTACTCGTAATTGTGTGGTTAGAAAGAGAATAATCTGCGTCGAT  
ACAACAACGTATTGGTCTGAATATGCTGGCCCCCTGGGCTGCTTCAAGCTATAGCAGATGGGACTAAGCTACTTTTTTA  
AAGAAGATATTCTGCCATCCCGAGGAGATATTTCTTTATTTAGCATTGGACCCTCTATAGCAGTCATATCAGTTTTATTA  
AGTTTTTTAGTTATCCCTTTGGGATATCATTGTTTTAGCCGATCTTAGTATTGGTGTTTTTTTATGGATTGCCATTTTC  
AAGTATAGCTCCTATTGGTCTTCTTATGGCAGGGTATAGCTCAAATAATAAATATTCTTTTTTCAGGCGGTCTACGAGCTG  
CTGCTCAATCCATTAGTTATGAAATACCATTAACCTTT---  
TGTGTGCTAGCAATATCTCTACTATCTAACAGTTCAAGTACAGTTGATATAGTTGAAGCACAGTCAAAATACGGTTTTTTT  
TGGATGGAATATTTGGCGTCAGCCTATAGGTTTTCTGGTTTTTTAATTTCTTCTTTGGCAGAATGTGAAAGATTACCCT  
TTGATTTACCAGAAGCGGAGGAAGAATTAGTAGCAGGTTACCAAAGTGAATATTCCGGTATCAAAATATGGTTTTATTTTAT  
CTTGTCTTACCTAAATTTATTAGTTTCTTCTTTATTTGTAACAGTTCTCTACTTGGGCGGGTGAATTTATCT---

ATCCCTATATATCCTTTTTTGATTTTTTCCAA-----  
ATGAATAAAGCAGTTGGAATTTTGGAAATGACAATGGGTATATTTATTACATTAACCTAAAGCTTATTTATTTCTTTCAT  
TTCTATCACAATAAGATGGACTTTACCGAGGATGAGAATGGATCAGTTATTAATCTTGGATGGAAATTTCTTTTACCTA  
TTCCCTGGGCAATCTCTTATTAACAACCTCTTCTCAACTTGTTCACTATA-----

ATGATCTGGCATGTACAGAATGAAAACCTTCATTCTCGATTCTACGAGTATTTTTATGAAGGCGTTTCATTTGCTTCTCTT  
CAATGGAAGTTTCATTTTCCCAGAGTGTATCCTAATTTTTGGCCTAATCTTCTTCTGATGTTTCGATTCAACCTCT----

---  
GTTCAAAAAGATAGACCTTGGTTCTATTTTCTCTTTCAACATGTTTTAGTAATAAGCATAACGGCCCTATTGTTCCGATG  
GAGAGAAGAACCTATAAATTAGCTTTTTCGGAAATTTCCAACGAACAATTTCAACGAAATCTTTCAATTTCTCATTTTAT  
TATGTTCAACTTTATGATTCTCTATCCGTAGAGTACATTGAATGTACAGAAATGGCTATAACAGAGTTTTCTGTTATTCT  
GTATTAACAGCTACTCTAGGGGGAATGTTTTTATGTGGTGTACACGATTTAATAACTATCTTTGTAGCTCCAGAATGTTT  
CAGTTTTATGTTCTACCTATTGTCTGGATATAACCGAGAGAGATCTACGGTCTAATGGGGCTTCTTTGTAATATTTACTCA  
TGGGTGGGGCAGGCTCTTCTATTCTGGTTTCATGGTTTTCTCTGGCTATATGGTTCATCTGGGGGGGAGATCGAGCTTCAA  
GAAATTGTGAACGGTCTTATAAATACACAAATGTATAACTCCCCAGGAATTTCACTTGCCTTATATCCATCACTGTAGG  
ACTTGGGTTTTAAGCTTTCCCAGCCCCTTTTTCATCAATGGACTCCTGACGTCTACGAAGGATCCCTACTCCACTTCGTTG  
CTTTTCATTCTATTACTTTCGAAAGTAGCTGCTTCAGCCTCAGCCACGCGAATTCTCGAATTCTCTCTTTATTTCTCATCA  
AACGAATGGCATCTTCTTCTGGAAATCCTAGCTATTCTTAGCATGATTTTGGGAAAT

Typha

TTGTTGGTCTCATGGTATATCTCAGTATAGAAGATGATACTAGGGATCTTTATTTGTTTATAAATTCTCCCGCGGATGG  
GTAATACCAGGAATAGCCATTTACGATACTATGCAA---  
TTTGTGCCACCTGATGTGCATACAATATGCATGGGATTAGCCGCGTCAATGGGATCTTTTATTCTGGTTCGGAGGAGAAAT  
TACCAAACGTCTAGCATTCCCTCACGCT---AGGGTTATGATTCACCAACCTGCTAGTTCTTTT---  
TATGAAGCACAAGCAGGGGAATTTATCCTGGAAGCGGAAGAATTACTGAAACTTCGCGAAACCCTCACAAAGGTTTATGT  
ACAAAGAACGGGCAACCCTTTATGGGTTGTATCCGAG---  
GATATGGAAAGGGATGTTTTTATGTACGCAACAGAAGCCCAAGCTCATGGCATTGTTGATCTTGTAGCGGTCGAA-----

-----ATGAAA-----CAATTACATGTACAAAAATATTTAGAA-----

AAAGTTAGATCTCGGAAACAACACTTC-----  
CTATATCCGCTTCTTTTTAAGGAGTATATTTATGCATTTGCTCATGATTATGGTTTA-----AATGGT-----  
-TCG-----ATTTTTTACGAACCCACGGAAATT---TTGGGTAAT-----  
GACAATAAATCTAGTTTACTGTTTGTGAAACGTTTAATTTATTCGAATGTATCAA-----

CAGAATTTTTGATTAATTCGACTAATCAT-----TCTAACCCAAATCGATTATTGGGCACAAC-----  
AATTATTTTTATTCTCGTTTTTTTTCTCAGATGATATCAGAAAGTTTTGCAGTCATTATGGAAATTCGATTTTCGCTGCG  
ATTA---GTATCTTCTCC-----GAAAA-----AAAGAAATACCACAATTCAT-----  
AATTTACGA-----  
TCTATTCATTCAATATTTCCCTTTTTAGAGGACAAATTCTCACATTTAAACTCTATCTCGGATATACTAATACCCCATCC  
TATCCATTTGGAAATCTTGGTTCAAATCCCTTCAATGTCGGATCCAAGATGTTCCATCTTTCGATTTATTGCGATTCTTTC  
TCCACGAATATCATAATTGGAATAGTCTC---ATTACT-----TCGAAGAAATCGATTTACGTT---TTTTCA---  
-----AAAGAAAT---  
AAAAGACTATTTAGATTACTATATAATTTTTATGTATTGAATGTGAATTTGTATTTCGTTTTTTCTTCGTAAACAATCTTC  
T---TATTTACAATTAACATCTTTTGGAACTTTTCTTGGACGAAATACATTTCTATGGAAAAATAGAACA-----  
-----CTTCTAGTA-----GTG-----TAT---CGT---AATTTTTTAATAAAAAC-----  
TTATGTTCTTACAGATCCTTTCATGCATTATGTTCGATATCAAGGAAAAGCAATTTCTGGCATCAAAGGGACTCATCT  
TTTTATGAAGAAATGGAAATGTTACCTTGTCAATTTCTGGCAATATTATTTTCATTTTTGGTCTCAACCGCACAGGATCC  
ATATAACCAATTA-----TCAAACACTATTCCTTCCATTTTTCTGGGTTATCTT-----  
TCAAGTTTACTAAGAAATCCTTTGGTGGTAAGGAATCAAATGCTGGAAAATTCATATCTAATAGATACTGTTATGACAAA  
ATTCGATACCATAGTACCAGTTGATCCTCTCATAGGATCATTGTCTAAAGCTAAATTTTTGTACCCTATTAGGACATCCTA  
TTAGTAAGCCGATCTGGACCGATTTATCGGATTGTGATATTATTGATCGCTTTGGTCGGATATGTAGAAATCTTTCTCAT  
TATTATAGTGGA---  
TCCTCAAAAAAACGAACTTTGTATCGAATAAAGTATATACTTTCGATTTTCTTGTGCGGAACTTTGGCTCGTAAACATAA  
AAGTACGGTA---CGTACTTTTATG-----CAAAGATTAGGTTCTGTA---TTATTAGAAGAATTTTTTACGGAA-  
-----GAAGAACAAGTCTTTCTTTGATCTTCCCC-----AAAACAACCTTTTTCTTTACATGGA-----  
TCACAT-----AGAGAACGATTTGGTATTTGGATATTATCCGTATCAAT-----GACTTAGTGAACCAT-----

Vitis

TTATTGGTCTTATGATATATCTCAGTATAGAGGATGAAAAACAAAGATCTGTATTTTTTTTTATAAAATTCTCCTGGCGGATGG  
GTACTACCCGGAATAGCTATTTATGATACTATGCAA---  
TTTGTGCCACCAGAGGTACATACAATATGCCTGGGATTAGCCGCTTCAATGGGATCTTTTTATCCTGGTTCGGAGGAACAAT  
TACCAAACGTCTAGCATTCCCTCACGCT---AGGGTAAATGATCCATCAACCGGCTGCCGCTTTT---  
TATGAGGCACAAGCCGGAGAATTTGTCATGGAAGCGGAAGAATACTGAAACTGCGCGAAATCATCACAAGGTTTTATGT  
ACAAAGAACGGGCAAACCTTATGGGTTGTATCCGAA---

GACCTGGAAAGGGATGTTTTTATGTCAGCAACAGAAGCCCAAACCTCATGGAATTGTTGATCTTGTAGCGGTTCAA-----  
-----ATG---AAAGAA-----CAAAAA-----  
-----TGGATTCAT---GAAGGTTTAAATTACTGAATCA---CTTCCCAACGGT-----  
ATGTTCCGGGTGCGTTTTAGATAATGAAAATATGATTCTAGGTTATGTTTTCAGGAAGG-----  
ATCCGACGTAGTTTTATACGGATACTACCAGGA-----  
GATAGAGTCAAAATTGAAGTAAGTCGTTATGATTCAACCAAAGGGCGTATAATTTATAGAATCCGA-----  
-----ACAAGGATTCGAATAATTAG-----  
-----ATGGAA-----GGAGTTCAAAGA-----TATTTTAAA-----  
CTAGATAGGTCTCGTCAAGATGACTTC-----  
CTATATCCACTTATCTTTTTCAGGAGTATATTTATGCACCTTTCTTATGATCATGGTTTA-----AACAGA-----  
-TCT-----ATTTTG-----TTGGAAAAT---GTGGGTTAT-----  
GACAATAAATCCAGTTTACTAATTGTGAAACGTTTAAATTACGCGAATGTATCAA-----  
CAGAATCATTGATTTTTTCT-----GAT-----TCTAATCAAAATCCATTTTTTTGGACACAAT-----AAGAAT--  
-----TTTTATTCTCAAATGATATCAGAGGGATTTGGAGTCATTGTGGAAATTCATTTTTCCCTACGATTA---  
GTCTCTTCTCTA-----GAAGGT-----AAAGAAATAGCAAAATCTCAT-----AATTTACGA--  
-----  
TCAATTCATTCAATATTTTCTTTTTTAGAGGACAAATTTCCACATTTAAAGTATGTGTCAGATATACTAATACCCACCC  
CATCCATCTGGAAATCTTGGTTCAAGCCCTTCGTTACTGGGTGAAAGATGCCTCTTCTTTGCATTTATTACGATTCTTTT  
TACACGAGTATCATAATTGGAATAGTATG---ATTACT-----CCAAAGAAATCAATTTCCATT---TTTTCA---  
-----AAAAGGAAT---  
CAAAGATTTTTCTTATTCTATATAATTTTCATGTATGTGAATACGACTCTATCTTCATTTTTATCCGCAATCAATCTTA  
T---CATTTACGATCAACATCTTATGGAGCCCTTCTTGGGCGAATATTTTTCTATGGAAAAATAGAGCAT-----  
-----TTTGTGCGAA-----GTC-----TTT---GCT---AATGATTTTCAGACAATC-----  
TTATGGTTGTTCAAGAATCCTTTTCATGCATTATGTTAGGTATCAAGGAAAATCCATTCTGGCTTCAAAGGGGGCGCCTCT  
TCTGATGAATAAATGGAAATATTACCTTGTCAATTTCTGGCAATGTCATTTTTACGTGTGGTCTCAACCAGTAAGGATCC  
ATATAAACCAATTA-----TCCAAGCATTCCCTCGACTTTCTGGGCTATCTT-----  
TCAAGTGTGCGACTAAATCCTTCAGTGGTACGGAGTCAAATGCTAGAAAATGCATTTATAATAGATAATGCTATTAAGAA  
GTTCCGATCTATAGTTCCAATTATTCTATCATTGGATCGTTGGCTAAAGCGAGATTTTGTAAATGCCTTAGGGCATCCCA  
TTAGTAAGCCGTCCTGGCCGATTTCATCAGATTATGATATTATCGACCGATTTGTGCGTATATGCAGAAATATTTCTCAT  
TATCACAGTGGA---  
TCCTCAAAAAAAGAATTTGTATCGAATCAAATATATACTTCGACTTTCTTGTGCTCGAACTTTGGCTCGTAAACACAA  
AAGTACTGTA---CGTGCTTTTTTG-----AAAAGATTAGGGTCGGAA---TTTTTGGAAAGAATTCCTTACAGAG-  
-----GAAGAACAAGCTCTTTCTTTAATCTTACCA-----AGAGTT---TCTTCTACTTCGCGAAGC-----  
TTATAT-----AGGGGACGTTTTTGGTATTTTGTATATTATTTGTATCAAT-----GATCTAGCCAATCATGAA-----  
-----ATGATAATTGAT-----ACACCAGAAGTA---CAA---GAT-----  
ATCAATTCTTTTTCCCGATTGGAATACTTA-----  
AAAGAGGTTTATGGGATCATATGGATGCTTGTACCTATTTTTACTCCTGTATTGGGAATCACAATAGGTGTACTAGCAAT  
TGTGTGGTTAGAAAGAGAAATATCCGCAGGGATACAACAACGTATTGGACCTGAATATGCCGGTCTTTGGGAATTCCTC  
AAGCTCTAGCAGATGGCACAAAACCTACTTTTTCAAAGAGAATCTTCTTCCATCTAGAGGAGATACTCGTTTATTCAGTATC  
GGACCATCCATAGCAGTCATATCAATTCTACTAAGTTATTTAATAATTCCTTTTGGCTCTAACCTTGTCTATCCGATCT  
CAATATCGGTGTTTTTTTTATGGATCGCCATTTCAAGTATTGCTCCCATTTGGACTTCTTATGTCAGGATATGGATCAAATA  
ATAAATATTCCTTTTTTAGGTGGTCTACGAGCTGCTGCTCAATCAATTAGTTATGAAATACCATTAACTCTA---  
TGCGTGTTATCAATATCTCTATTATCTAACAGTTCAAGTACAGTTGATATAGTTGAGGCGCAGTCAAAATATGGTTTTTG  
GGGGTGGAAATTTGTGGCGTCAACCTATAGGGTTTATCGTTTTTCTAATTTCTTCCCTAGCCGAATGCGAAAGATTGCCTT  
TTGATTTACCAGAAGCAGAAGAAGAAATTAGTAGCAGGTTATCAAACCGAATATTCGGGTATCAAATTTGGTTTTATTTTAC  
GTTGCTTCTTATCTAAATCTACTAGTTTCTTCAATTTTGTAAACAGTTCTTTACTTGGGAGGTTGGGATCTCTCT---  
ATTCCGTACATATTTGTTTCTGAGTTTTTTTGA-----  
ATAAATAAAGCGGGTGAAGTCTTTGGAACGACAATTGGTATCTTTATTACATTAGCCAAAACCTTATTTGTTCTTGTTCAT  
TCCTATCACAACAAGATGGACTTTACCTAGGCTGAGAATGGACCAACTATTAATCTTGGATGGAAATTTCTTTTACCTA  
TTTCTCTAGGTAATCTATTATTAACAACCTTCTTCCCAACTCCTTTCACTGTAA-----  
-----  
ATGATCTGGCATATACAGAATGAAAACCTTCATTCTCGATTCTACGAGAATTTTTATGAAAGCCTTTCATTTGCTTCTCTT  
CGATGGAAGTTTTATTTTCCAGAATGTATCCTAATTTTTGGCCTAATTTCTTCTTCTGATGATCGATTCAACCTCT----  
--  
GATCAAAAAGATATACCTTGGTTATATTTTCACTCTTCAACAAGTTTAGTAATGAGCATAACGGCCCTATTGTTCCGATG

GAGAGAAGAACCTATGATTAGCTTTTCGGGAAATTTCCAAACGAACAATTTCAACGAAATCTTTCAATTTCTTATTTTAC  
TATGTTCAACTCTATGTATTCCTCTATCCGTAGAGTACATTGAATGTACAGAAATGGCTATAACAGAGTTTTCTTATTCC  
GTATTAACAGCTACTCTAGGAGGAATGTTTTTATGCGGTGCTAACGATTTAATAACTATCTTTGTAGCTCCAGAATGTTT  
CAGTTTTATGCTCCTACCTATTATCTGGATATACCAAGAAAGATGTACGGTCTAATGAGGCTACTACGAAATATTTACTCA  
TGGGTGGGGCAAGTTCTTCTATTCTGGTTCATGGTTTTCTTGGCTATATGGTTCATCCGGGGGAGAGATCGAGCTTCAA  
GAAATAGTGAATGGTCTTATCAATACACAAATGTATAACTCCCCAGGAATTTCAATTGCGCTTATATTTCATCACTGTAGG  
AATTGGGTTCAAGCTTTCCCCAGCCCTTCTCATCAATGGACTCCTGACGTATACGAAGGATCTCCCCTCCAGTCGTTG  
CTTTTCTTTCTGTTACTTCGAAAGTAGCTGCTTCAGCTTCAGCCACTCGAATTTTCGATATTCCTTTTTATTTCTCATCA  
AACGAATGGCATCTTCTTCTGGAAATCCTAGCTATTCTTAGCATGATATTGGGGAAAT

Yucca

TTGTTGGTCTCATGGTATATCTCAGTATAGAAGATGATACTAAGGATCTTTATTTGTTTATAAACTCCCCGGCGGATGG  
GTAATACCAGGAATAGCCATTTATGATACTATGCAA---  
TTTGTTCGCTGATGTACATACAATATGCATGGGATTAGCCGCTTCAATGGGATCTTTTATTCTGGTCGGAGGAGAAAT  
TACCAAACGTCTAGCATTCCCTCACGCT---AGGGTTATGATTCACCAGCCTGCTAGTTCTTTT---  
TATGAGGCGCAAGCAGGCGAATTTATCCTGGAAGCGGAAGAACTACTGAAACTTCGCGAAACCCTCACAAAGGTTTATGT  
ACAAAGAACGGGCAACCCTTTATGGGTTATATCCGAA---  
GACATGGAAAGGGATGTTTTTATGTGACGAACAGAAGCCCAAGCTCATGGAATTGTTGATCTTGTAGCGGTCGAA-----

-----ATGGAA-----GAATTACAAGGA-----TATTTAGAA-----

AAGGATAAATCTCGGCAACAACACTTC-----  
CTATATCCGCTACTCTTTCAGGAGTATATTTATGCACCTTGCTCATGATCATGGTTTA-----AATGGT-----  
-TCG-----ATTTTTTACGAACCTGTGCGAAGTT---TTTGGTTAT-----  
GACAATAAATCTAGTTTTAGCACTTGTAACACGCCTAATTACTCGAATCTATCAA-----  
CAGAATTATTTGATTTCTTCGGTTAATGAT-----TCTAACCAAAAAGAGGCTCGTTGGGCATAAC-----  
AATTTTTTTTTATTCTCATTTTTTATTCTCAAATGATATCAGAAAGTTTTGCAATTATTGTAGAAATTCCGTTCTCGCTGCT  
ATTA---GTATCTTTTTTC-----GGAGAAAA-----AAAGAAATACCAAAATATCAT-----  
AATTTACGA-----

TCAATTCATTCCATTTTTCCCTTTTTAGAGGACAAATTATCGCATTAAATTATGTCTCAGATATACTAATACCTCATCC  
CATCCATATGGAAATCTTGGTTCAAATTTCAATGCTGGATTCAAGATGTTTCTTTTTTGCATTATTGCGATTCTTTT  
TTCACGAATATCATAATTGGAATAGTCTTCTCATTACT-----CATAAAAAATCTATTTGTGTT---TTTTCA---  
-----AAAGAAAT---

AAAAGACTATTTAGGTTCTTATACAATTCTTATATATTTGAATGTGAATTTTTATTCTGTTTTTTTTCGTAAACAATCTTC  
T---

TATTTACGATTAACATCTTCTGGAACTTTTCTTGAGCGAACACATTTCTATGGAAAAATAGAACATTTTCAAATAAAACA  
TTTGCATTTTATAGTA-----GTA-----TGT---CCT---AACTATTTTTATAAGACC-----  
CTATGGTCCTTCAAAGAACCTTTTATGCATTATGTTTCGATATCAAGGAAAAGCAATTTCTTGCTTCAAAGGGGACTCATCT  
TGTAATGAAGAAATGGAAATATCATTTTGTCAATCTTTGGCAATATTATTTTCACTTTTTGGTCTCAACCGTACAGGATCC  
ATATAAATCAATTA-----TCAAATCTTTTCTATTTTCTGGGTTATTTT-----

TCAAGTCTACTAAGAAATCTTCCGGCAGTAAGGAATCAAATGTTAGAGAATTGTTTTCTAATAGATATCATTACTAAGAA  
ATTTGATACCATAATCCCTATTATTCTTCTTATTGGATCCTTGTCTAAAGCTCAATTTTGTACCGTATCGGGCCATCCTA  
TTAGTAAGCCGATCTGGGCCGATTTATCAGATTCTGATATTCTTGATCGATTCCGTTGGATATGTAGAAATCTTTCTCAT  
TATTACAGTGGG---

TCCTCAAAAAAACCAGGGTTTGTATCGAATAAAGTATATACTTCGACTTTCGTGTGCTAGAACTTTGGCTCGTAAACATAA  
AAGTACAGTA---CGCACTTTTTTG-----CGACGATTAGGTTTCGGGG---TTATTAGAAGAATCTTTACGGAA-  
-----GAAGAACAGGTTCTTTCTTTGATCTTTCCC-----AAAACAATTTCTTTTACTTTACATGGA-----  
TCACAT-----AAAGAACGTATTTGGTATTTGGATATTATCCGTATTAAT-----GACCTAGTGAAT-----





ATTCGATAACCACAGTCTTTGCAACTCCCCTTGTCTGGATCCTTATCAAAAGCTCAATTTTTGTACTGGATCGGGGCATCCTA  
TTAGTAAACCCGTTTTGGACTGATTTATCAGATTGGGATATTCTTGATCGTTTTGGTTCGGATATGTAGAAATATTTTTTCAT  
TATCATAGTGGA---  
TCTTCGAAAAAACAGACTTTGTATCGACTAAAATATATACTTCGACTTTTCATGTGCTAGAACTTTAGCTCGTAAACATAA  
AAGTACGGTA---CGAACTTTTATG-----CAACGATTGGGTTTCGGTA---TTTTTAGAAGAATTTTTTACGGAA-  
-----GAAGAGCAAGTTTTTTCTTTGATGTTACC-----AAAACAATTCACTTTTTCTTTCCATGGA-----  
TCACAC-----AGTGAGTGTATTTGGTATTTGGATATTATCCGTATCAAT-----GACCTGGTGAATCCT-----  
-----  
-----ATGATAATAGAT-----AGGGTAGAGGTA---GAA---ACT-----  
ATCAATTCCTTTTTCGAAATCGGAATTATTT-----AAAGAAATCTACGGACTTATATGGATTCTA---  
CCCATTTTTGCCCCTCTACTGGGAATCACAATAGAAGTACTCGTAATTGTGTGGTTAGAAAGAGAAATATCCGCATCGAT  
ACAACAACGTATTGGTCTGAATATGCTGGCCCCCTGGGACTGCTTCAAGCTATAGCAGATGGAACATAAATACTTTTAA  
AAGAGGATATCCTCCCATCCCAGGAGATATTCCTTTATTTAGCATTGGTCCCTCTATAGCAGTCATATCCATTTTATTA  
AGTTTTTTAGTTATCCCTTTAGGATATCGTTTTGTTTTAGCTGATCTTAGTATTGGTGTTTTTTTATGGATTGCGATTTT  
AAGTATTGCTCCTATTGGTCTTCTCATGGCAGGATATAGCTCAAATAATAAATATTCTTTTTTCAGGCGGTCTACGAGCGG  
CTGCTCAATCTATTAGTTATGAAATACCATTAACTTTT---  
TGTGTACTAGCAATATCTCTACTATCTAATAGTTCAAGTACAGTTGATATAGTTGAAGCACAGTCCAAATATGGTTTTTT  
TGGATGGAATCTTTGGCGTCAGCCTATAGTTTTCTAGTTTTCTAATTTCTTCTTTGGCAGAATGTGAAAGATTACCCT  
TTGATTTACCAGAAGCAGAAGAAGAATTAGTAGCAGGTTATCAAACCGAATATTCTGGTATTAATATGGTTTTATTTTAT  
CTTGTCTTACCTAAATTTATTAGTTTCTCTTTATTTGTAAGTCTTCTATACTTAGGCGGGTGAATTTCTCT---  
ATCCCTATATATCCTTTTTTTGGATTTTTTCAA-----  
ATGAATAAAATAAATTGGAATTTTGGAAATGGTAATAGGTATCTTTATTACATTAATAAAGCTTATTTATTTCTTTCAT  
TTCTATCACAATAAGATGGACTTTACCCAGGATGAGAATGGATCAGTTATTAATCTTGGATGGAAATTTCTTTTACCTA  
TTTCTCTGGGCAATCTCTTATTAACAACCTTCTTCCCAACTAGTTTCACTATA-----  
-----

ATGATCTGGCATGTACAGAATGAAAACCTTCATTCTCGATTCTACGAGAATTTTTATGAAAGCGTTTCATTTGCTTCTCTT  
CCATGGAAGTTTCATTTTCCCAGAATGTATCCTAATTTTTGGCCTAATTTCTTCTTCTGATGATCGATTTAACCTCT----  
--

GATCAAAAAGATAGACCTTGGTTCTATTTTCATCTCTTCAACAAGTTTTAGTAATAAGCATAACGGCCCTATTGTTCCGATG  
GAGAGAAGAACCTATAAATTAGCTTTTTCGGGAAATTTCAAACGAACAATTTCAACGAAATCTTTCAATTTCTTATTTTAT  
TATGTTCAACTTTTATGATTCTCTATCCGTAGAGTACATTGAATGTACAGAAATGGCTATAACAGAGTTTTCTGTTATTC  
GTATTAACAGCTACTCTAGGGGGAATGTTTTTATGTGGTGCTAACGATTTAATAACTATCTTTGTAGCTCCAGAATGTTT  
CAGTTTATGTTCTACCTATTGTCTGGATATACCAAGAGAGATCTACGGTCTAATGAGGCTACTATGAAATATTTACTCA  
TGGGTGGGGCAAGCTCTTCTATTCTGGTTCTATGGTTTTCTCTTGGCTATATGGTTCTATCTGGGGGGGAGATCGAGCTTCAA  
GAAATTGTGAATGGTCTTATCAATACACAAATGTATAACTCCCCAGGAATTTCAATTGCGCTTATATTCATCACTGTAGG  
ACTTGGGTTCAAGCTTTCCCCAGCCCTTTTTCATCAATGGACTCCTGACGTCTACGAAGGATCCCCACTCCAGTCGTTG  
CTTTTCTTTCTGTTACTTTCGAAAGTAGCTGCTTCAGCTTTAGCCACGCGAATTTCTCGATATTCCTTTTTATTTCTCATCA  
AACGAATGGCATCTTCTTCTGGAAATCCTAGCTATTCTTAGCATGATATTGGGGAAT

Acorus

CTCATTGCTATTACTCAAACAAGCATGAAACGTATGCTTGCATATTCGTCTATCGGTCAAATCGGATATGTAATTATTGG  
AATAATTGTTGGAGACTCAAATGATGGATATGCGAGCATGATAACTTATATGCTGTTCTATATCTCCATGAATCTAGGAA  
CTTTTGCTCGCATTGTATTATTTGGTCTACGTACCGGAACCTGATAACATTTCGAGATTATGCAGGATTATACACGAAAGAT  
CCTTTTTTGGCTCTCTCTTTAGCCCTATGTCTCTTATCCCTAGGAGGTCTTCTCCACTAGCAGGTTTTTTTCGGAAAAC  
CCATCTCTTCTGGTGTGGATGGCAGGCAGGCCTATATTTCTTGGTTTTCAATAGGACTCCTTACGAGCGTTGTTTCTATCT  
ACTATTATCTA-----AAAATAATCAAGTTATTAATGACT-----  
GGACGAAACCAAGAAATAACCCCTCACGTGCGAAATTTATAGAAGA-----TCTCCT-----TTA-----  
AGATCAAACAATTCATCGAATTGAGTATGATTGTATGTGTGATAGCATCTACTATAACCAGGAATATCAATGAACCCCAT  
TCTTGCAATTGCTCAGGATACCCTCTTTTAG-----  
ATGTTTCTGCTTACGAATATGATATTTTTCTGGGCATTTCTACTAATATCA-----  
AGTGTATTCTCTATTTTAGCATTTTTAATTTCCGGAGTTTTAGCCCCAACGAGGGAAGGACCCGAGAAGCTTTCTAGTTA  
TGAATCGGGTATAGAACCAATAGGGGATGCTTGGGTACAATTCGAATCCGATATTATATGTTTGGCTTTAGTTTTTTGTTG  
TTTTTGATGTTGAAACGGTCTTTCTTTATCCATGGGCAATGAGTTTCGATGTATTGGGTGTATCCGTATTTCTAGAAGCT  
TTGATTTTCTGCTTATCCTAATTGTTGGTTCAGTTTTATGCATGGCGAAAGGGGGCATTGGAATGGTCTTAG-----  
-----ACGAGTTATTTT-----  
CCTTGGTTAACCATAATTGTTGTTTTTCCGATATCCGAGGTCTTTCAATTTTCTTTCTCCCG-----  
CATAGAGGGAATAAG-----

GTGGTTCGGTGGTATACTATATGTATTTGTTTGCTAGAACTCCTTTTAATGACCTATGTGTTCTGTTATCACTTT-----  
-----CAATTGAACGATCCATTAATCCAATTGGATGAAGATTATGAATGGATAAAT---  
ATTTTTGATTTTCACTGGAGACCAGGAATCGATGGACTTTCCATAGGACCCATTCTACTGACGGGATTTATCACTACTTT  
AGCTACTTTAGCGGCTTGGCCGGTACTCGAGATTTCGCGATTGTTCCATTTCTGATGTTAGCAATGTACAGTGGTCAA  
TAGGATTATTTTCTTCTCGAGACCTTTTACTTTTTTTTTCTCATGTGGGAGTTAGAATTAATTCCCGTT---  
TACCTACTTTTTATCTATGTGGGGTGGGAAGAAACGGCTGTACTCGGCTACCAAGTTTTATTTTGTACACAGCGGGGGTTC  
TGTTTTTCTTTAATGGGAGTTCGGGTATGGGTTTATATGGTCCAATGAACCAACATTAAATTTTGAAACATCGGCTA  
ATCAATCGTATCCTGTGTCATTGGAAATACTATTTTATTTTGGATTCCCTATTGCTTATGCTGTCAAATTACCGATTATA  
CCCCTCCATACATGGTTACCAGATACCCATGGAGAAGCCCATTACAGTACATGTATGCTTCTAGCTGGAATCTTATTTAA  
AATGGGAGCATATGGATTAGTTCGGATCAATATGGAATTATTGCCCCACGCTCATTCTATATTTCCCCCTGGTTGGTAC  
TAGCGGGAACGTTGCAAATAACTATGCAGCTTCAACTTCTCTTGGTCAAGTTAATTTAAAAAAGAGAATCGCCTATTCC  
TCCGTATCTCATATGGGTTTCACAATTTATAGGAATTGGTCTATAACCGATACAGGACTCAATGGAGCCATTTTACAGTT  
ACTCTCTCATGGATTTCTTGGT-----  
GCTGCACTTTTTTCTTAGCGGGAACAAGTTGTGATAGAATACGTCTTATTTATCTCGACGAAATGGGGGAATATCC--  
-----  
ATCCCAGTGCCTAAAATATTTACCATGTTCAAGTAGCTTCTCAATGGCTTCTCTTGCATTGCCAGGAATGAGTGGTTTTGT  
TGCGGAAGCAGTAGTATTTTTTGAATAAATTACTAGTCAAAAATTTCTTTTTTGGCCAAAATACTAATTACTTTTTGTAA  
TGGCAATTGGAATGATATTAATCCTATTTATTTATTATCCATGTTACGC-----  
CAGATCTTCTATGGATACAAG-----CTATTTAATATGACAAAC---TCTTAT-----  
TTTATGGATTCTGGACCACGAGAATTTTTGTTTCGATCTGTATCTTTTTGCCCGTAATAGGTATTGGTATTTATCCCGA  
TTTTGTTCTATCGTTATCAGTTGACAAGGTGGAAGCTATTTTATCTAATTACTTTTATAGATAG-----  
ATGATGCTG-----  
GAGTATGTACTTTTTTGGAGTGTATTATTTTCCATCGGTATCTATGGATTGATTACAAGTCGAAACATGGTTAGAGC  
ACTTATGTGTCTTGAACCTATACTGAATGCGGTTAATATCAATCTCGTAACATTTTCTGATTTATTTGATAGTCGCCAAT  
TAAAGGAGACATTTTTTTCGATCTTTGTTATAGCTATTGCAGCCGCTGAAGCAGCTATTGGACCAGCTATTGTTTCATCG  
ATCTATCGTAACAGAAAATCCATTTCGTATTAATCAATCAAATTTGTTGAATAAATAGATGGAACATACATATCAATATGC  
ATGGATAATACCTTTCCTTCCATTTCCAGTTACTATATCAATAGGGTTGGGACTTCTGCTCGTTCCAACGGCAACGAAAA  
ATCTTCGCCGATTTGGGCTTTTTTTAGTGTTTTATTGCTAAGTATAGCTATGGTGTTTTCGGCCGATCTGGCTATTTCAG  
CAAATAAACGGGAGTTTTTATCTATCAATATTTACTGGTCTTGGACGATTAATAACACTTTTTTCAATTAGAGTTGGATCTT  
AATTGATCCACTTACCTCTATTATGTTAATACTAATCACTACTGTTGGAATCATGGTCTTATTTATAGTGATAAATTATA  
TGCTCTCATGATCAAGGATATTTAAGATTTTTTGGTTATATGAGTTTTTCAATACTTCTATGTTAGGATTAGTTACTAGT  
TCTAATTTGATACAAATTTATATTTTTTGGGAACCTCGTAGGAATGTGCTCCTATTTATTAATAGGGTTTTGGTTCACACG  
ACCAACTGCAGCAAATGCTTGTCAAAAAGCGTTTGTAACTAATCGTGTAGGGGATTTTGGTTTGTATTAGGAATCTTAG  
GTCTTTATTGGATAACAGGTAGTTTTCGAATTTCCGGATTTGTTGCAAATTTAAAAAATTTGATCCAT-----AAT---  
AATGAA-----  
GTCAATTCCTTTATTTGCCGCCCTGTGCGCCTCACTATTTTGTGGTGGCGTTGCGAAATCCGCACAATTTCCACTTCA  
TGTATGGTTACCTGATGCTATGGAGGGCCCTACCCCATTTTCGGCTCTTATACACGCTGCTACTATGGTAGCGGGGCA  
TTTTTCTTGTAGCTAGGCTTCTTCTCTTTTTCACAGTCATACCTTACATAATGAATTTTCAATTTCTTTGATAGGTATAATA  
ACAGTCTTTTAGGGGCTACTTTAGCTCTTGTCAAAGAGACATTAAGAAGTTTAGCCTACTCTACAATGTCTCAGTT  
AGGTTATATTATGTTAGCTCCAGGTATAGGCTCTTATCGAGCTGCTTTATTCCATTTGATCACTCACGCCTATTCTAAAG  
CATTATTGTTTTTAGGATCTGGATCAATTATTCATTCAATGGAACCTATTGTTGGATATTCACCAGAGAAAAGTCAGAAC  
ATGATTCTTATGGGTGGTTTTAAGAAGATATGTTCCAATTACAAAACCACTTTTTTCTTAGGTACACTTTCTCTTTGTGG  
TATGCCCCCTCTTGTGTTTTTGGTCCAAAGATGAAATTTCTAATGATACTTGGTTATATTCACCAATTTTCGCAATAA  
TAGCTTGGTCCACAGCAGGATTAATGCAATTTATATGTTTCGGGTATATCTCCTTACTTTTGGATGGTCAATTTACAAGTT  
CATTTTCAAAATTTTCAGTAGTACTAAAAATAGCTCCTTCTATTCAATATCTATATGGGGAAAAGAAGTACCGAAAACCACT  
TAAC-----GTAAAT-----TTGTTT-----TTATCAACA-----ATGAACACTAAC-----  
GAAAAAATGTCTTTT-----TTTTCGAAAAAT---ACA---TAT---CAA-----ATTGATAGAAATGGA--  
-AAAAAC-----CGAATT-----CGTTACTTTAGTACT-----CAGTTTGGAA---AAT-----  
AAGTAC-----ACT---  
TCCATGTATCCCATGAATCGGACAATACTATGCTTTTTCCGATGCTTGTATTGGTCTTATTTACTTTGTTTATTGGATT  
TATAGGAATT---CCTTTC-----  
GATCAAGGAGTAATTGATTTGGATATATTATCAAAATGGTTAACTCCATCGATA-----  
AACCTTTTACATTCCAATTCGGCGAT-----TCCTTTGATTGG-----  
TATGAATTTGTGACAAATGCAATTTATTCAGTCACTATATC  
Amborella  
CTCATTGCTATTACTCAAACAAGCATGAAACGTATGCTTGCATATTCGTCCATAGGTCAAATCGGATATGTAATTATTGG  
AATAATTGTTGGAGACTCAAATGATGGATATGCAAGCATGATAACTTATATGCTGTTCTATATCTCCATGAATCTAGGAA

CTTTTGCTCGCATTGTATCATTGGTCCACGTACCGGAACTGATAACATTCCGGGATTATGCAGGATTATACACGAAAGAT  
CCTTTTTTGGCTCTCTCTTCAGCCCTATGTCTCCTATCCCTAGGAGGTATTCTCCATTAGCAGGTTTTTTTCGGAAAAC  
CCATCTATTCTGGTGTGGATGGCAGGCGGGCCTATATTTCTTGGTTTTCGATAGGACTCCTTACGAGCGTTGTTTCTATCT  
ACTATTATCTA-----AAAATAATCAAGTTATTAATGACT-----  
GGACGAAACAAAGAAATAACCCCTCACGTGCGAAATTATAGAAGA-----TCTCCT-----TTA-----  
AGATCAAACAATTCCATCGAATTGAGTATGATTGTATGTGTAATAGCATCTACTATACCAGGAATATCAATGAACCCAA  
TATTGCAATTGCTCAGGATACCTTCTTTTAA-----  
ATGTTTCTGCTTACGAATATGATATTTTCTGGGCATTTCTAATGATATCA-----  
AGTGTTATTCCCTATTTTGGCATTCTAATTTCTGGAGTTTTAGCCCCGATTAGTCAAGGACCAGAAAAGGTCTCTAGTTA  
TGAATCAGGTATAGAACCAATGGGGGATGCTTGGATAACAATCCGAATCCGCTATTACATGTTTGCCTAGTTTTTGTG  
TTTTTGATGTGAAACCGTTTTTTCTTTATCCATGGGCCATGAGTTTCGATGTATTGGGCGTATCCGTATTTATAGAAGCT  
TTAATTTTCGTGCTTATCCCAATCGTTGGTTTCAATTTATGCATGGCGAAAAGGAGCATTGGAATGGTCTTAG-----  
-----ACGAATAATTTT-----  
CCTTGGCTAACAGCGATTCTTCTTTTGCCCATATCCGCGGGTTCTTCAATTCTGTTTATACCT-----  
CAGAGAGGAAATAAA-----  
GCGGTTCCGGTGGTATACTATATGTATATGCTTATTAGAACTTCTCCTAATGACCTATGTATTTTATTATAATTTT-----  
-----CAATTGGACGATCCATTAATCCAATTGGAAGAGGATTGTAACCTGGATAAAT---  
CTTTTTGATTTTCACTGGAGACTAGGAATTGATGGACTTTCCATAGGTCCCATTTTATTGACGGGATTCATCACTACTTT  
AGCTACTTCAGCGGCTTGGCCAGTTACTCGAAATTCGCGATTATTTTCAATTTCTGATGTTAGCAATGTATAGCGGTCAA  
TAGGATCATTCTTCTCGGGACCTTTTACTTTTTTTCATCATGTGGGAGTTAGAATTAATTCCTGTT---  
TACCTACTTTTATCGATGTGGGGAGGAAAAAACGTCTGTATTAGCTACAAAATTCATTTTGTACACCCGAGGAGGTTT  
CATTTTTCTCTTAATAGGAGTTCTGGGTATGGGCCTATATAGTTCCAATCAACCCATGTTGAATTTTGAACATCAGCCA  
ATCAATCGTATCCCGTGGGATTGGAAATCCTATTCTATTTCCGGCTTCCTTATTGCTTATGCTGCCAAACCACCGATTATA  
CCCCTACATACATGGTTACCAGATACTCATGGAGAGGCGCATTACAGTACATGTATGCTTCTGGCTGGAATCTTATTTAA  
AATGGGAGCATATGGGTTGGTTTGAATCAATATGGAATTATTACCCCATGCTCATTCTCTATTTTCTCCTTGGTTGGTAA  
TAGTGGGAACCTTCAAATAATCTATGCAGCTTCAACTTCTCTTGGCCAACGCAATTTAAAAAAGAGAATAGCCTATTCC  
TCCGTATCTCATATGGGTTCCACAATCATAGGAATTGGTTCCATGACCGATACGGCACTCAATGGAGCCATTTTACAAAT  
AATTTCTCATGGATTTATTGGT-----  
GCTGCACTTTTTTCTTGGCAGGAACAAGTTACGATAGAATACGGTTTTCTTTATCTCGACGAAATGGGAGGAATAGCT--  
-----  
ATACCAATGCCAAAAATATTTACTATGTTAGTATCTTTTTCGATGGCCTCTCTCGCATCGCCAGGAATGAGTGGTTTTGT  
TGCAGAATTTTTTGGTCTTTTTGGGAATAATTACCAGCCCCAAAATATCTTTTTATCCCAAAAATACTAATTACTGTTGTAA  
TGGCAATTGGAATGATATTAATCCCATTTATTTATTATCTATGTCACGC-----  
CAGATGTTCTATGGATACAAA-----CTATTCAATGTTCCAAAT---TCTTAC-----  
TTTGTAGATTCTGGACCGCGAGAAATATTTATTTTAACTCTATCCTTCTACCTGTAATGGGTATTGGTATTTTATCCTGA  
TTTTCGTTCTTTCACTATCAGTTGATAAGGTAGAAGCTATTTTAGCAAATTACTTTAATGGATAG-----  
ATGATGTT-----  
GAGTATGCACCTGTTTTAAGTAGTTATTTATTTTCTATGGGTATCTATGGATTAATCACAAGTCGAAACATGGTTAGAGC  
ACTTATGTGCTTGGACTTATACTGAATGCTGTTAATATGAATCTCGTAACATTTTCTGATTTATTTGATAGTCGACAAT  
TAAAGGGAGACATTTTCTCGATCTTCGTTATAGCTATTGCAGCCGCTGAAGCAGCTATTGGCCCAGCTATTGTTTCATCA  
ATCCATCGTAACAGAAAATCCACTCGTATCAATCAATCAAAATTTGTTGAAGAAATAGATGGAACGTACATATCAATATGC  
ATGGATCATACCCTTCTTACGCTTGCAGTTCCCTATTTTATGATAGGATTGGGACTCCTGCTTGTTCCTCCCGGCAACAAAA  
GTATTCGTGGATATGGGCTTTTCCCAGTGTTTTATTGTTAAGTATAGTTATGGTTTTTTTCTACCAATTTGTCTATTAG  
CAAATAAATGGTAATTCGATTTATCAATATCTATGGTCCCTGGACCATCAATAGTATTCTTCTTAGAGTTTCGGCTATTT  
GATCGATTCACTTACTTCTATTATGTCAATATTAATTGCTACTGTTGGAATGATGGTTCTTATCTATAGTGATAATTATA  
TGTCTCATGATAAGGGATATTTAAGATTTTTTGGCTTATATGAGTTTTTTCAATACTTCAATGTTGGGTTAGTTATTAGT  
CCCAATTTGATACAAAATCTATATTTTCTGGGAACCTTGTGGGAATGTGTTTCGATCTATCAATAGGTTTTTGGTTTTACTCG  
ACCAAGTGCAGCAAATGCTTGTCAAAAAGCGTTTGTAACTAATCGTGTAGGGGATTTTGGTTTTATTATTAGGAATCTTAG  
GTCTTTATTGGATAGCGGGTAGTTTCAATTTCCGGGATTTGTTTATGATATTTCAATGATTCAATCGATAATATCGATAAT  
AATGTG-----  
TTGAATTCCTCTTTTGGCTATTCTGTGCGCCTCCTTATTATTCTGGGTGCAGTTGCTAAATCCGCACAATTCCTCCCTTCA  
TGTATGGTTACCTGATGCCATGGAGGGACCAACTCCTATTTCCGGCTCTTATACATGCTGCTACTATGGTAGCAGCAGGAA  
TTTTTCTTGTAGCTCGGCTTCTTCTCTTTTGGACAGTTATACCCTACATAATGAATCTTATTTCTTTGATAGGTGTAATA  
ACAGTACTATTAGGAGCCACTTTGGCTCTTGGCTCAAAGGACATTAAGAAGTTTGGCTTATTCTACGATGTCTCAACT  
GGGTTATATTATGTTGGCTTCCAGGTATAGGTTCTTATCGAGCCGCTTTATTCCATTCAATCACTCATGCCTATTTCGAAAG  
CATTATTGTTTTTGGATCTGGATCAATTATTCATTCTATGGAACCTATTCTTGGGTATTCTCCAGATAAAAAGCCAGAAC  
ATGTTTTTATGGGTGGTTAAGTAAATATGTGCCGATAACAAAGGCTACTTTTTTGTAGGTACGCTCTCCCTTTGTGG

TATTCCACCCCTTGCTTGTCTTCTGGTCCAAAGATGAAATTCTTAATAATAGTTGGTTGTATTTCGCCAATTTTCGCGATAA  
TAGCTTCTTCTACAACAGGATTAAGTGCATTTTATATGTTTCGTATGTATTTACTTACTTTTTGAAGGGCATTACGCGTT  
CATTTTAAA-----  
GGTGATACAAATAGTTTCTTGTATTCAATATCTATATGGGGGAAAGAAGGACCAGAAAGTTTTTAGC-----AGAAAT--  
----TTGATT-----TTATTATCA-----ATGAATAATAATCAAAATGAAAAAGTTTTCTTCT-----  
--TTTTTGAATAAG-----AAT---AAG-----ATATATCAGATTGAT---AGAGAT-----  
GTAATAAAAATGCGATCCTTTAGCACT-----CATTTTGTC---AAA-----AAAGAA-----ACC--  
-  
TTTCCCTATCCCCACGAATCGGACAATACTATGTTATTCCCCTTACTTTTTATTGGCCATATTGACTTTGTTCGTTGGGTC  
CGTAGGAATT---CGTTTC-----  
GGTCAAGGAGTAACGGACTTTGACGTGTTATCAAAATGGTTAATTCATCAATATCAATGGACCTTTTTTCATGAGTATTT  
GAATCCT-----TCGGCGGATTGG-----TATGAATTTGCACAAAATGCAATTTATTTCAGTCAGTATAGC

Arabidopsis

CTCATTGCTATTACTCAAACAAGCATGAAACGTATGCTTGCATATTCGTCCATAGGTCAAATCGGATATGTAATTATTGG  
AATAATTGTTGGAGACTCAAATGGTGGATATGCGAGCATGATAACTTATATGCTGTTCTATATCGCCATGAATCTAGGAA  
CTTTTGGCTTGCATTATATTATTTGGTCTACGTACCGGAACACTGATAACATTTCGAGATTATGCAGGATTATACACAAAAGAT  
CCTTTTTTGGCTCTCTCTTTAGCTCTATGTCTCTTATCCCTAGGAGGTCTTCTCCACTAGCAGGTTTTTTTTGGAAAAC  
CCATTTATTCTGGTGTGGATGGCAGGCAGGCCTATATTTCTTGGTTTTCAATAGGACTCCTTACGAGCGTTCTTTCTATCT  
ACTATTATCTA-----AAAATAATCAAGTTATTAATGACT-----  
GGACGAAACCAAGAAATAACCCCTCACATGCGAAATTATAGAATA-----TCCCCT-----TTA-----  
AGATCAAACAATTCATCGAATTGAGTATGATTGTATGTGTGATAGCATCTACTATACCAGGAATATCAATGAACCCGAT  
TATTGCGATTGCTCAGGATACCCTTTTTAGCTTCTAG-----  
ATGTTTCTGCTTTACGAATATGATATTTTCTGGGCATTTTACTAATATCA-----  
AGTGCTATTCCCTGTTTTGGCATTCTAATTTCCGGAGTTTTATCTCCAATTAGGAAGGGGCCGGAGAACTTTCTAGTTA  
TGAATCAGGTATAGAACCGATCGGGGATGCTTGGTTACAATTTAGAATCCGTTATTATATGTTTGGCTCTAGTTTTTTGTTG  
TTTTTGATGTTGAAACTGTTTTTCTGTATCCGTGGGCAATGAGTTTCGATGTACTGGGGGTATCTGCTTTTATAGAAGCT  
TTCATTTTCGTGCTTATCCTAATTTCTTGGTTTAGTTTTATGCATGGCGAAAAGGAGCATTGGAATGGTCTTAG-----  
-----GTGTATCTTGTCTTTACCACGAATGATTTT-----  
CCTTGGTTAACAATAATTTGTTTTTCCAATATCTGCTGGTTTCATTAATGTTATTTCTCCCG-----  
CATAGGGGAAATAAA-----  
GTCAATAAATGGTATACTATATGCATTTGCATCTTAGAACTTCTTCTAACGACCTACGCTTTTTGTTATAATTTT-----  
-----AAAATGGACGATCCATTAATTCAACTGTCCGAAGATTATAAATGGATCGAT---  
TTTTTTGATTTTTACTGGAGAATGGGAATAGATGGACTTTCTATAGGAACTATTTTACTGACGGGATTTATTACTACTTT  
AGCCACTTTAGCGGCTTTTCCAGTTACTCGGGATTCCCGATTTTTTTCATTTCTGATGTTAGCAATGTACAGCGGTCAA  
TAGGATCATTTTCTTCTCGGGATCTTCTACTTTTTTTCATCATGTGGGAATTAGAATTAATTTCCCGTT---  
TATCTACTTTTATCCATGTGGGGTGGAAAGAAACGTCTGTATTTCGGCTACAAAATTTATTTTGTACACGGCAGGAAGTTC  
TATTTTTTTATTAATAGGAGTTTTAGGTATAAGTTTTATATGGTTTCGAACGAACCAACATTAATTTAGAACTCTTAGCTA  
ATAAATCCTATCCTGTTACACTTGAAATACTATTTTATATTGGATTTCTTATTGCTTTTGGCGTCAAATCACCGATTATA  
CCTTTACATACTTGGTTACCTGACACCCACGGTGAGGCACATTACAGTACCTGTATGCTTCTCGCTGGAATCTTATTA  
AATGGGAGCCTATGGGTTGGTTTCAATCAATATGGAATTATTACCCACGCTCATTCTATGTTTTCTCCTTGGTTGTTGG  
TAGTCGGTACAATCCAAATAATTTATGCAGCTTCAACATCTCCCGGTCAACGTAATTTAAAAAAGAGAATAGCCTATTCT  
TCTGTATCTCATATGGGTTTTATAATTATAGGTATTAGTTCTATAACGGATCCTGGACTTAATGGAGCTATTTTACAAAT  
AATTTCTCATGGATTTATTGGC-----  
GCTGCACTTTTTTTCTTGGCAGGAACGAGTTATGATAGAATTAGGCTTGTTTTATCTTGATGAAATGGGTGGAATGGCT--  
-----  
ATCTCCATTCCAAAAATATTTACAATGTTCACTATTTTATCGATGGCTTCCCTTGCAATGCCGGGCATGAGTGGTTTTAT  
TGCAGAATTCATTGTTTTTTTTTGGAAATAATTACCAGCCAAAAATATTTCTTAATTTCCAAAATTTTCATTATTTTTGTAA  
TGGCAATTTGGAATGATATTAAGTCTATATATTTATTATCTATGTTACGC-----  
CAAATGTTCTATGGATACAAG-----TTAATTAATATCAAAAAC---TTTTCT-----  
TTTTTTGATTCTGGACCCCGAGAGTTATTTCTTTCAATCTCTATTCTTTTACCATAATTGGTATTGGGATTTATCCTGA  
TTTTTGCTCTCATTAGCAAGTGACAAGGTGCAATCCATTTTATCTAATTATTTTTTATGGATAG-----  
ATGATACTC-----  
GAACATGTACTTGTTTTTGAGTGCCTATTTATTTTTGATTGGTCTTTATGGATTGATCACAAGTCGAAATATGGTTAGGGC  
TCTTATGTGTCTTGAACCTATACTCAATGCAGTTAATATGAATTTTCGTAACATTTTCTGATTTTTTTGATAATTTCCCAAC  
TAAAAGGGGAAATTTTCTGCATTTTTGTTATAGCAATTGCAGCCGCTGAAGCAGCTATTGGATTAGCTATAGTCTCGTCA  
ATTTATCGTAACAGAAAATCAATTCGCATAAACCAATCGACCTTATTAATAAGTAAATGGAACATACATATCAATATTC  
ATGGATCATCCCTTTTCATTCCACTTCCAGTACCTATTTTACTAGGAGTTGGACTTCTCCTTTTTCCGACAGCAACAAAA

ACCTTCGCCGCATGTGGACTTTTTCTTAGTATTTTTTTGTTAAGTATAGTTATGATCTTTTCAATCTATCTATCTATTCAA  
CAAATTTTTCTAAGTTGCATTTCATCAAAATGTATGGTCTTGGACCATAAATAATGAATTTTTCTTTTGAGTTTCGGTTACTT  
TATCGATCCACTTACTTCTATTATGTCAATATTAATTACAACCTGTTGGGATTTTGGTTCTGATTTATAGTGACAATTATA  
TGTCGCATGATCAAGGATACCTGAGATTTTTTTGCTTATATGGGTTTTTTAATACTTCAATGTTAGGATTAGTTACTAGT  
TCTAATTTGATCCAAGTTTATTTTTTTTGGGAATTAGTTGGAATGTGTTTCGATTTTATTAATAGGTTTTTGGTTTCACACG  
ACCTATTGCAGCGAATGCTTGTCAAAAAGCTTTTTGTAACATAATCGTGTAGGGGATTTTGGTTTTATTATTAGGAATTTTAG  
GTCTTTATTGGATAACTGGCAGTTTTGAATTTTCAGGATTTGTTTCGAAATATTCAATAATTTAATTTTA-----AAT---  
AATAGA-----  
GTAAATCTCTTATTCTTACTTTGTGTGCATTTCTATTATTTGTAGGTCCTATTGCTAAATCCGCACAATTTCTCTTCA  
TGTATGGTTACCTGATGCCATGGAGGGCCCTACTCCCATTTTCGGCTCTTATAACATGCTGCTACTATGGTAGCGGGCGGTA  
TTTTTCTTTGTAGCTCGTCTTCTTCTTTTTATCGTTATCCCTTCTATAATGTATATAATATCTTTGATAGGTATAATA  
ACAGTACTCTTAGGAGCCACTTTAGCTCTTGTCTCAAAAAGACATTAAGCGGGGTTTAGCCTATTCTACAATGTCTCAACT  
CGGTTATATGATGTTAGCTCTAGGTATGGGGTCTTATCGATCTGCTTTATTTTCAATTTGATTACTCATGCTTATTTCGAAAG  
CTTTGTTGTTTTTAGGATCTGGATCCATTATTCATTCAATGGAAGCTATAGTTGGATATTCTCCCGATAAAAAGTCAGAAT  
ATGATTCTTATGGGTGGTTTTGACAAAACATGTCCCGATTACAAAACGGCCTTTTTAATAGGAACACTCTCTCTTTGTGG  
TATCCCCCCCCCTTGTCTGTTTTTGGTCGAAAGATGAAATTCTTAATGATAGTTTGTATTTCGCCAATTTTGAATAA  
TAGCTTGTTCACAGCGGGATTAACCGCATTTTATATGTTTCGGATTTATTTACTTACTTTTGAAGGACATTTAAACACT  
TATTTTCTAAATTACAGTGGAAAAAAGTGGCTCCTTCTATTCACTCTCTTTATGGGGTAAAGAAGAAGAAAAAAGT  
TAAT-----AAAAAT-----TTTGGGTTAGTACCATTATTAACA-----ATGAATAATACA-----  
AAAAGAGCTTCTTTT-----TTTTGCAATAAA---ACA---TAT---AAA-----ATAAGTAATAATGTA--  
-AGAAAT-----CAAATTTTTATTACTGTTGAA-----AATTTTGGACTTAAT-----  
ACAAGA-----ACT---  
TTCTATTATCCGCATGAATCAGACAATACTATTCTATTTCTATGCTTATTTTGGTTTTATTTACTTTGTTTTATTGGAGC  
CATAGGAATT---CCTTTC-----  
AATCAAGAAGGAATAGACTTTGATATATTATCAAAATTTTTTCACGCCGTCAATA-----  
AACCTTTTGCATAAAAATTCACAAAAT-----TTTGTAGATTGG-----  
TATGAATTTTTGAGAAATGCAACTTTTTTCGGTCAGTATAGC

Atropa

CTCATTGCTATTACTCAAACAAGCATGAAACGTATGCTTGCATATTTTCGTCATAGGCCAAATCGGATATGTAATTATTGG  
AATAATTGTTGGAGACTCAAATGATGGATATGCAAGCATGATAACTTATATGCTGTTCTATATCTCCATGAATCTAGGAA  
CTTTTGTCTGCATTGTATTATTTGGTCTACGTACCGGAACTGATAACATTTCGAGATTATGCAGGATTATACACAAAAGAT  
CCTTTTTTGGCTCTCTCTTTAGCCCTATGTCTCTTATCCCTAGGAGGTCTTCTCCACTAGCAGGTTTTTTTCGGAAAAGT  
CTATTTATTCTGGTGTGGATGGCAGGCAGGCCTATATTTCTTGGTTTTAATAGGACTCCTTACAAGCGTTGTTTTCTATCT  
ACTATTATCTA-----AAAATAATCAAGTTATTAATGACT-----  
GGACGAAACCAAGAAATAACCCCTCACGTGCGAAATTATAGAAGA-----TCCCCT-----TTA-----  
AGATCAAACAATTCATCGAATTGAGTATGATTGTATGTGTGATAGCATCTACTATAACCAGGAATATCAATGAACCCGAT  
TATTGCAATTGCTCAGGATAGCCTTTTTTAG-----  
ATGTTTCTGCTTTACGAATATGATTTTTTTTTGGGCATTTCTAATAATATCA-----  
ATCCTTGTTCCTATTTTGGCATTTCATTTCCGGAGTGTTAGCCCCAATTAGCAAAGGGCCGGAGAAACTTTCTACTTA  
TGAGTCGGGTATAGAACCAATGGGCGATGCTTGGTTACAATTTAGAATCCGTTATTATATGTTTGTCTAGTTTTTGTGG  
TTTTTGATGTTGAAACGGTTTTTCTTTATCCATGGGCAATGAGTTTCGACGATTGGGGTGTATCTGTATTTATAGAAGCT  
TTCATTTTTCGTGCTGATCTTAATTATTGGTTTAGTTTATGCATGGCGAAAGGGGGCATTGGAATGGTCTTAG-----  
-----ACGAATTATTTT-----  
CCTTGGTTAACAATAATTGTCGTTTTTCTATATTTGCGGGTTCCTTAATTTTCTTTCTTCCC-----  
CATAAAGGAAATAGG-----  
GTAATTAGGTGGTATACAATTTGTATATGTATTTTAGAACTCCTTCTAACGACTTATGCATTTTGTATCATTTC-----  
-----CAATTGGATGATCCATTAATCCAACCTAGTGGAGGATTATAAATGGATCGAT---  
TTTTTTGATTTCCATTGGAGATTAGGAATAGATGGACTTTCTATAGGACCCATTTTATTAACAGGATTTTACTACTTTT  
AGCGACTTTAGCGGCTTGGCCAATTACTCGAGATTCTCGATTATTCCATTTTATCATGTTAGCAATGTACAGTGGTCAA  
TTGGATCATTTCATCCCGGGACCTTTTACTTTTTTTCATCATGTGGGAGTTAGAATTAATTCCTGTT---  
TATCTACTTCTAGCCATGTGGGGAGGAAAGAAACGTCTGTACTCAGCTACAAAATTTATTTTGTACACGGCAGGGGGTTC  
TGTTTTTCTATTAATGGGAGTTTTTGGGTGTTGCTTTATATGGTTCTAATGAACCAACATTAATTTTGAACATTAGTTA  
ATCAGTCATATCCTGTGGTTTTAGAAATAATCTTCTATATTGGATTTTTTATTGCTTTTGTGTCAAATTGCCATTATC  
CCTCTACACACATGGTTACCAGATACCCATGGAGAAGCACATTACAGTACTTGTATGCTTCTAGCCGGAATCTTATTA  
AATGGGAGCGTATGGATTAATTCGAATCAATATGGAATTACTACCTCACGCCATTTCTATATTTTCTCCTTGGTTGATGA  
TAATAGGTACAATACAATAATCTATGCAGCTTCAACATCTCTTGGCCAACGGAATTTAAAAAAGAATAGCCTATTCC  
TCTGTCTCTCATATGGGTTTTCATAATTATAGGAATTAGTTCTCTAACCGATACGGGACTTAATGGAGCCCTTTTACAAT



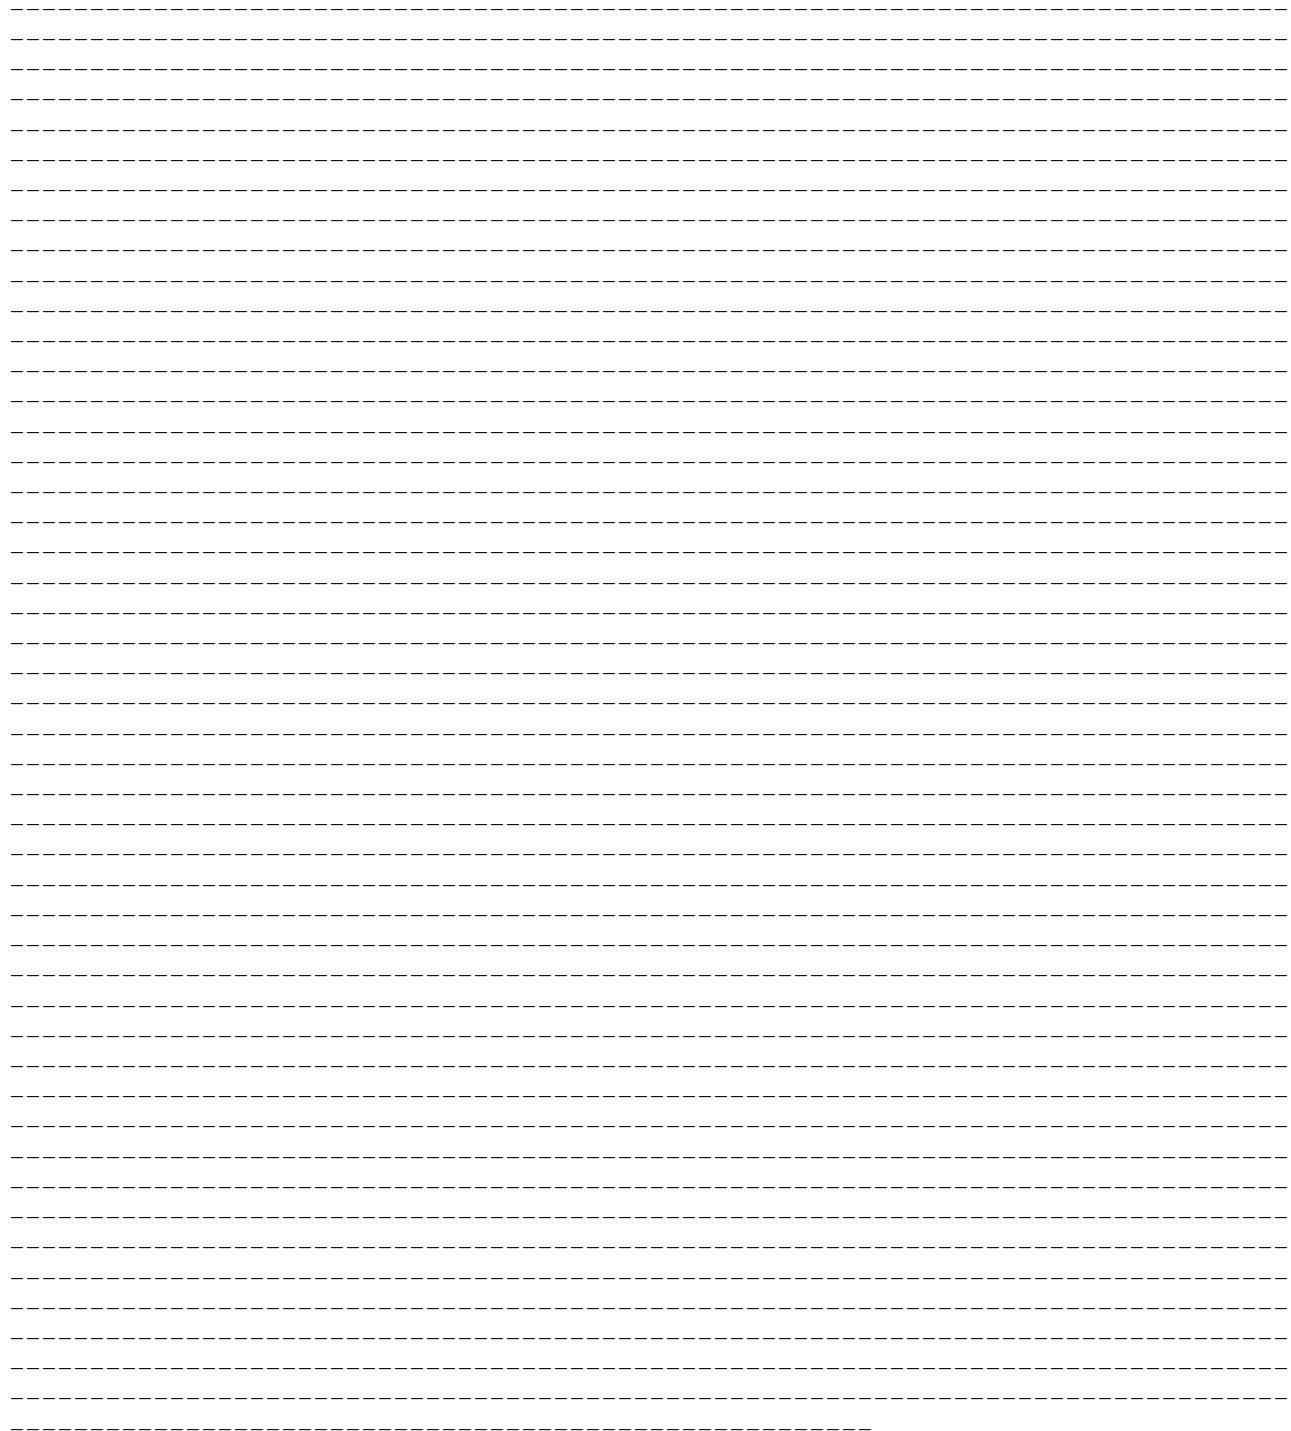

Calycanthus

CTCATTGCTATTACTCAAACAAGCATGAAACGTATGCTTGCATATTCGTCCATAGGTCAAATCGGATATGTAATTATTGG  
AATAATTGTTGGAGACTCAAATGATGGATATGCAAGCATGATAACTTATATGCTGTTCTATATCTCCATGAATCTAGGAA  
CTTTTGCTCGCATTGTCTCATTGGTCTACGTACCGGAACTGATAACATTTCGAGATTATGCAGGATTATACACGAAAGAT  
CCTTTTTGGCTCTCTCTTCAGCCCTATGTCTCTTATCCCTAGGAGGTCTTCCCTCCACTAGCAGGTTTTTTTCGGAAA  
CCATCTATTCTGGTGTGGATGGCAGGCAGGCCTATATTTCTTGGTTTTCAATAGGACTCCTTACGAGCGTTGTTTTCTATCT  
ACTATTATCTA-----AAAATAATCAAGTTATTAATGACT-----  
GGACGAAACCAAGAAATAACCCCTCACGTGCGAAATTATAGAAGA-----TCCCTT-----TTA-----  
AGATCAAACAATTCCATCGAATTGAGTATGATTGTATGTGTGATAGCATCTACTATACCAGGAATATCAATGAATCCAAT



TATTGCAATTGCTCAGGATACCTCTTTTAG-----  
ATGTTTCTGCTTCACGAATATGATATTTTCTGGGCATTTCTAATAATATCA-----  
AGTGTCAATTCCTATTTTGGCATTCTAATTTCCGGAGTTTTAGCCCCGATTTCGTGAAGGACCAGAGAAGCTCTCTAGTTA  
TGAATCAGGTATAGAACCAATGGGGGATGCTTGGTTACAATCCGAATCCGCTATTACATGTTTGGCTCTAGTTTTTGTG  
TTTTTGATGTTGAAACGGTCTTTCTTTATCCATGGGCAATGAGTTTCGATGTACTGGGTGTATCTGTATTTATAGAAGCT  
TTAATTTTCGTGCTTATCCCAATTGTTGGTTAGTTTTATGCATGGCGAAAGGGAGCGTTGGAATGGTCTTAG-----  
-----ACGAGTTATTTT-----  
CCTTGGTTAACAGTAATTGTTGTTTTACCGATATCCGCGGGTTCATCAATTTTCTTTGTCCCT-----  
TATAGAGGGAATAAAAAATAAGGTGATTCGATGGTATACTATTTGTATATGCTTATTAGAAATCCTTCTAACGACCTACGC  
AATCTGTATCATTTTC-----CAATCGGACGATCCATTAATCCAATTGGAGGAGGCTTATAAATGGATACAT--  
--  
ATTTTTGATTTTCATTGGAGACCGGGAATCGATGGACTTTCATAGGACCTATTTTACTGACGGGATTTCATCACTACTTT  
AGCCACTTTAGCGGCTCGGCCAGTTACTAGAGATTTCGCGATTGTTCCATTTCTGATGTTAGCAATGTACAGTGGTCAAG  
TAGGATCATTCTTCTAGAGACCTTTTACTTTTTTCTCATGTGGGAGTTAGAATTAATTCCTGTT---  
TACCTACTTCTATCCATGTGGGGGGGAAAAACGTATGTACTCGGCTACAAAGTTTTATTTTGTACACAGCGGGGGGTTT  
CATTCTTCTTAAATGGGAGTTTCGGGCATGGGTTTATATGGCTCCAATGAACCAACATTAAATTTTGAACATTAGCTA  
ATCAATCGTATCCTTTGGGATTGGAAATAATATTCTATTTTGGCTTCCTTATTGCTTATGCTGTCAAATCGCCGATTATA  
CCCCTACATACATGGTTACCAGATACCCATGGAGAAGCACATTACAGTACATGTATGCTTCTAGCCGGAATCTTATTTAAA  
AATGGGAGCATAACGATTAGTTCCGATCAATATGGAATTATTACCCCATGCTCATTCTATATTTTCTCCCTGGTTGGTCA  
TAGTGGGAGCAATTCAAATAATCTATGCAGCTTCAACTTCTTTGGTCAACGCAATTTCAAAAAGAGAATAGCCTATTCC  
TCTGTATCTCATATGGGTTTACACTTATAGGGATTGGTTCCATAACTGATACGGGACTTAATGGGGCCATTTTACAAAT  
AATCTCTCATGATTTTATTGGT-----  
GCTGCACTTTTTTCTTGGCAGGAACAAGTTACGATAGAATACGTCTTGTATTCTCGACGAAATGGGAGGAATAGCT--  
-----  
ATCCCAATGCCAAAAATATTTACCATGTTTCAGTAGCTTCTCGATGGCTTCTCTTGCATTGCCGGGAATGAGTGGTTTTGT  
TGCGGAATTGGTAGTATTTTTTGGAAATAATTACCAGCTCGAAATATCTTTTAAATGCCAAAAATAGTAATTTCTTTTGTAA  
TGGCAATTTGGAATGATATTAACCTCTATTTATTCATTATCTATGTTACGT-----  
CGGATGTTCTATGGATATAAG-----CTATTCAACGTCCCAGAC---TTTTAT-----  
TTTTTGGATTTCTGGACCACGAGAACTATTTGTTTCGATCTGTATCTTTCTACCTGTAGTAGGGATTGGTATTTATCCCGA  
TTTTCGTTCTCTCCCTATCAGTTGATAGGGTAGAGGCTATTCTATCTAATTTATTTTCATAAATAG-----  
ATGATGACC-----  
GAGTATGTACTTATTTTGGAGTGCCTATTTATTTTTCGATCGGTATTTATGGACTGATCACAAGCCGAAACATGGTTAGAGC  
ACTTATGTGTCTTGGACTTATACTGAATGCGGTTAATATGAATCTCGTAACGTTTTCTGATTTATTTGATAGTCGCCAAT  
TAAAAGGAGATATTTTCTCGATTTTTGTTATAGCTATTGCAGCCGCTGAAGCAGCTATTGGGCCGGCTATTGTTTCATCG  
ATCCATCGTAACCGAAAATCAACTCGTATCAATCAATCAAAATTTGTTGAATAAATAGATGGAACATACATATCAACATGC  
ATGGATCATAACCTTTTCGCTCCACTTCCATTTACTATGTCAATAGGATTGGGACTTCTGCTTGTTCGACCGCAACAAAA  
ATCTTCGTCGTATGTGGACTTTTCTAGTGTTCATTGCTAAGTATAGCAATGGTTTTTTTCGGTCAATCTGTCTATTCAA  
CAGATAAATGGCAGTTCTATCTATCAACATCTATGGTCTTGGACTATCAATAATGATTTTTTCTTTTCGAGTTTCGGCCACTT  
GATCGACCCGCTTACTTCTATTATGTCAATACTAATCACTACTGTTGGAATCATGGTTCTTATTTATAGTGACAATTATA  
TGTCTCATGATCAAGGATATTTGCGATTTTTTGGTTATATGAGTTTTTCCAATACTTCAATGTTGGGATTAGTTACTAGT  
TCCAATTTGATACAAATTTATATTTTTTGGGAAGTATGGGAATGTGTTTCGATTTTATTAATAGGTTTTTGGTTTCACACG  
ACCCACTGCAGCAATGCTTGTCAAAAAGCGTTTGTAACTAATCGTGTAGGCGATTTTCGGGTTATTATTAGGAATTTTGG  
GTTTTTATTGGATAACTGGTAGTTTCGAATTTCCGGATTTGTTTCGAAATCTTTACTAACCTGATCCAT-----AAT---  
AATGGA-----  
GTCAATTTCTTTATTTGCTACTCTGTGTGCCTTCTTATTTATTCGTCGGTGCAGTTGCTAAATCCGCACAATTTCTCTTCA  
TGTATGGTTACCCGATGCCATGGAGGGACCTACTCCTATTTTCGGCTCTTATACATGCTGCTACTATGGTAGCAGCAGGAA  
TTTTTCTTGTGCTCGCTCGGCTTCTTCCGCTTTTTCACAGTTATACCTTACATAATGAATCTCATTCTTTGATAGGTGTAATA  
ACATTACTATTAGGAGCTACTTTAGCTCTTGTCTCAAAGAGACATTAAGAGAAGTTTAGCCTATTCTACAATGTCTCAACT  
GGGCTATATTATGCTAGCCCCAGGGATAGGTTCTTATCGAGCTGCTTTATTCCATTTGATTACTCATGCCTATTTCGAAAG  
CATTATTGTTTTTAGGATCCGGATCCATTATTCATTCAATGGAACCCATTGTTGGCTATTCTCCAGATAAAAAGTCAGAAC  
GTGGTTCTTATGGGTGGTTTAAACAAAATATCTGCCAATTACAAAACACTACTTTTTTATTAGGTACTACTTTCTCTTTGTGG  
TATTCCACCTCTTGTCTGTTTTTGGTCTAAAGATGAAATTCTTAATGATAGTTGGTTGTATTACCAATTTTTCGCGATAA  
TAGCTTGTCTTACAGCAGGGTTAACTGCATTTTATATGGTTTCGGGTGTATTTACTTACTTTTGTATGGGCATTTACACGTT  
CATTTTCAAAATTACAGTGGGACTCGAAATAGCTCATTTTATTCAATATCTATATGGGGGAAAGAAGGAACAAAATTCGT  
TAAT-----GGAAAT-----TTGCT-----TTATCAACA-----CTGAAACCTAAT-----  
AAAATTTCTTT-----TTTTCGAAAAAG---ATA---TCCAACAAA-----ATGGATGGGAATGTA---  
GGAAAT-----CGGATA-----CGATCTTTTAGCTTTAGGATT-----CGTTTTGAC---AAT-----

AAAGAA-----ACT---  
TTTGTGTATCCCCATGAATCGGACAATACAATGCTATTGCCTCTGCTTGGATTGGTCCTATTTACTTTGTTTGGTGGATC  
CGTAGGAATT---CCTTTC-----  
GATCAAGGAGGAACAGAATTTGATATATTATCGAAATGGTTAAATCCATCAATA-----  
AACCTTTTACATCCAAATTCGAACGTT-----TCTGTGGATTGG-----  
TATGAATTTGGAACAAATGCAATTTATTTCAGTTAGTATAGC  
Ceratophyllum  
CTCGTTGCTATTACTCAAACAAGCATGAAACGTATGCTTGCATATTCGTCCATAGGTCAAATCGGATATGTAATTATTGG  
AATAATTGTTGGAGACTCAAATGATGGGTATGCAAGCATGATAACTTATATGCTGTTCTATATCTCCATGAATCTAGGAA  
CTTTTGCTCGCATTTGTATCATTGGTCTACGTACCGGAACGATAACATTCGAGATTATGCAGGATTATACACGAAAGAT  
CCTTTTGGCTCTCTCTTCAGCCCTATGTCTCTTATCCCTAGGAGGCTTCCCTCCGCTAGCAGGGTTTTTCGGAAAAC  
CCATCTATTTGGTGTGGATGGCAGGCAGGCCTATATTTCTTGGTTTCAATAGGACTCCTTACGAGCGTTGTTTCTATCT  
ACTATTATCTA-----AAAATAATCAAGTTATTAATGACT-----  
GGACGAAACCAAGAAATAACCCCTCACGTGCGAAATTATAGAAGA-----TCCCCT-----TTA-----  
AGATCAAACAATTCCATCGAATTGAGTATGATTGTATGTGTGATAGCATCTACTATACCGGGAATATCAATGAACCCAAT  
TATTGCAATTGCTCAGGATACCCCTCTTTTAG-----  
ATGTTTTTGGCTTACGAATATGATATTTTTTGGGCATTTTTAATAATATCA-----  
AGTATTATACCTATTTTAGCATTTCTAATTTCCGGAGTTTTAGCCCCCTTAGTGAAGGACCAGAGAAGTTTTCCAGTTA  
TGAATCGGGTATAGAACCGATGGGGGATGCTTGGTTACAATCCGAATCCGCTATTACATGTTTGGCTCTCGTTTTTGGT  
TTTTTGATGTTGAAACAGTCTTTCTTTATCCATGGGCAATGAGTTTTGATGTTTTGGGCGTATCTGTATTTATAGAAGCT  
TTAATTTTTCGTGCTTATCCCAATTGTTGGTTAGTTTTATGCGTGGCGAAAAGGAGCATTGGAATGGTCTTAG-----  
-----ACGAGTTATTTT-----  
CCTTGGTTAACAATAATTGTTCTTTTTTCCAATATCTGCGGGTTCCTTCATTTTTCTTTCTACCT-----  
TATAAGGGAAATAAG-----  
GTGATTGCGATGGTATACTATTGGTATATGTTTGTGTTAGAACTCCTTCTAATAACCTACGCATTCTGTTATTTTTTTC-----  
-----CAATTAGATGATCCATTAATCCAACCTAGAAGAGGATTATAAATGGATCAAT---  
TTTTTTGATTTTCATTGGAGATTAGGAATTGATGGACTTTCCATAGGACCCATTTTACTGACCCGATTTCATCACTACTTT  
AGTACTTTTAGCCGCTTGGCCTGTTACTCAAGATTACGATTTCCATTTCTTGATGTTGGCGATGTATAGTGGTCAAA  
TAGGATTTATTTCTTCTCGAGATCTTTTACTTTTTTTCATCATGTGGGAGTTAGAATTAATTCCTGTT---  
TACCTACTTTTTATCCATGTGGGGAGGGAAGAAACGTCTGTACTCAGCTACAAAGTTTTATTTGTACACCCGCGGGAGGTT  
CATTTTTCTCTTAATGGGAGTTCTGGGTATGGGTTTATATGGTTCCAACGAACCCATATTGAATTTTGAAACATCAGCTA  
ATCAATCCTATCCTATGGCATTGGAAATCTTATTCTATTTTTGGATTCCCTTATTGCTTATGCTGTCAAATACCGATCATA  
CCTCTACATACATGGTTACCGGATACTCATGGAGAAGCACATTACAGTACATGTATGCTTTTAGCCGGAATCTTATTA  
AATGGGAGCATATGGATTGATTTCGGATCAATATGGAATTATTGCCCATGCACATTCTATATTTTCCCCCTGGTTGATGA  
TAGTAGGCACAGTTCAAATAATCTATGCAGCTTCAACTTCTTTTCGGTCAACGCAATTTAAAAAAGAGAATCGCCTATTCC  
TCTGTATCTCATATGGGTTTATAAATTATAGGAATTTGTTCCATAACGGATACAGGACTCAATGGAGCCGTGTTACAAAT  
AATTTCTCATGGATTTATTGGT-----  
GCTGCACTCTTTTTCTTGGCAGGAACCAGTTACGATAGAATACGTATTGTTTATCTCGACGAAATGGGAGGAATAGCT--  
-----  
ATCCCAATGCCAAAAATATTTACCATGTTCAGTAGTTTTTCGATGGCTTCTCTTGCATTACCAGGAATGAGTGGTTTTGT  
TGCAGAATTAATAGTCTTTTTTGGGAATAATTACTAGCCCCGAAATATCTTTTAATGCCAAAAGTACTAATTACTTTTGTA  
TGGCAATTGGAATTATATTAACGCCTATTTATTTCATTATCCATGTTACGA-----  
CAGATGTTCTATGGATACAAG-----TTATTCAATGTTCCAAAC---TCGTAT-----  
TTTGTGGATTCCGGACCCCGAGAACTTTTTATTTCTATCTGTATCTTGTACCCGTAATCGGTATTGGTATTTATCCTGA  
TTTTGTTTTATCGCTATTGGGTGACAAGGTAGAAGATTTCTATCTAATTACTTTTCAGCGATAG-----  
ATGATGCTC-----  
GAGCATGAACCTGTTTTGAGTGCCTATTTATTTTCGATTGGTATCTATGGATTGATCACAAGCCGAAATATGGTTAGAGC  
ACTTATGTGCTTGGACTTATACTAAATGCAGTTAATATGAATCTTGTAAACATTTTCTGATTTATTTGATAGTCGCCAAT  
TAAAAGGAGATATTTTTTCAATCTTTGTTATAGCCATCGCAGCCGCTGAAGCAGCCATTGGACCAGCTATTGTTTCTCG  
ATCTATCGTAATAGAAGATCCACTCGTATCAATCAATCAAATTTGTTGAATAAATAGATGGAACATACATATCAATATGC  
GTGGATCATAACCCCTTCTTCCACTTACAGTTACTATGTTAATAGGATTGGGACTTCTTCTTTTCCCGATCGCAACAAAA  
ATCTTCGTGGATGTGGGCTGTCCCTAGTGTTTTATTCTTGGAGTATAGGTATGCTTTTTGTGGTTCGAGCTGGCTATTCAG  
CAAATAAATCAGAGTTCCGTCTATAAATATTTATGGTCTTGGACTATAAATAATGATTTTTCTTGTAGAAATTCGGCTATTT  
GATTGATCCACTGACTTCCATTATGTCAATACTAATCACTACTGTTGGAATCTTAGTTCTTATTTATAGTGATAATTATA  
TGTCTCATGATCAAGGATACTTGGAGTTTTTTTTCTTATCTTAGTTTTTTAATGCTTCTATGTTGGGATTAGTTACTAGC  
TCGAATTTGATACAAATTTATATCTTTTGGGAATTAGTAGGAATGTGCTCGTATCTATTAATAGGTTTTTGGTTTCGCAAG  
ACCCATTGCGGCAATGCTTGTCAAAGGCCTTTGTAACGAATCGTGTAGGGGACTTTGGTTTTATTATTAGGAATATTAG



Citrus

CTCATTGCTATTACTCAAACAAGCATGAAACGTATGCTTGCATATTCGTCCATAGGTCAAATCGGATATGTAATTATTGG  
AATAATTGTTGGAGACTCAAATGGTGGATATGCGAGCATGATAACTTATATGCTGTTCTATATCTCCATGAATCTAGGAA  
CTTTTGCTTGCATTGTATTATTTGGTCTACGTACCGGAACTGATAACATTCGAGATTATGCAGGATTATACACAAAAGAT  
CCTTTTTTGGCTCTCTCTTTAGCTCTATGTCTCTTATCCCTAGGAGGTCTTCCCTCCACTAGCAGGTTTTTTTCGGAAA  
CCATTTATTCTGGTGTGGATGGCAGGCAGGCCTATATTTCTGGTTTTCAATAGGACTCCTTACGAGCGTTGTTTTCTATCT  
ACTATTATCTA-----AAAATAATCAAGTTATTAATGACT-----  
GGACGAAAGCAAGAAATAACCCCTCACGTGCGAAATTATAGAGGA-----TCCCCT-----TTA-----  
AGATCAAACAATTCCATCGAATTGAGTATGATTGTATGTGTGATAGCATCTACTATACTAGGAATATCAATGAACCCGAT  
TATTGCAATTGCTCAGGATACCCTTTTTTAG-----  
ATGTTTCTGCTTTACAAATATGATATTTTCTGGGCATTTCTAATAATATCA-----  
AGCGTTATTCCCTATTTTGGCATTCTAATTTCCGCAGTTTTAGCCCCGATTAACAAAGGGCCAGAGAACTTTCTAGTTA  
TGAATCGGGTATCGAACCAATGGGCGATGCTTGGTTACAATTTCGAATCCGGTATTATATGTTTGGCTCTAGTTTTTGTG  
TTTTTGATGTTGAAACCGTTTTTCTTTATCCATGGGCAATGAGTTTTGATGATTGGGGGTACCCGTATTTATAGAAGCT  
TTCATTTTCATGCTTATCCTAATTGTTGGTTTTAGTTTTATGCGTGGCGAAAAGGAGCATTAGAGTGGTCTTAG-----  
-----ACGAATTATTT-----  
CCTTGGTTAACTAATTGTAGTTTTTCCGATAGCCGCGGTTCTTTAATTTTTTTTTCTCCCT-----  
CATAGAGGAAATAAG-----  
GTGACTAGAGGATATACAATATATATATGTGTCTTAGAACTCCTTCTAACGACCTATGCATTCTGTTATAATTT-----  
-----CAATTGGACGATCCATTAATCCAGCTGGCAGAGGATTATAAATGGATCACT-----  
TTTTTTGAGTTTGACTGGCGATTGGGAATAGATGGACTTTCATAGGACCCATTTTACTGACGGGATTTATCACCCTTT  
AGCTACTTTAGCGGCTCGGCCAGTTACTCTGAATTTCCGACTATTCCACTTCTGATGTTAGCGATGTACAGCGGTCAA  
TAGGATCATTCTTCTCGGGACCTTTTACTTTTTTTCATCATGTGGGAATTAGAATTAATTTCCCGTT---  
TATCTACTTCTGTCCGTGTGGGGTGGAAAGAAACGCCTTTATTTCAGCCACAAAATTTATTTTGTACACGGCAGGAGGCTC  
CGTTTTTCTTTAATAGGAGTTTTGGGTATCGGTTTATATGGTTCCAATGAACCAACATTAATTTGGAAACATTAGTTA  
ATCGGTTCGTATCCTGTGGCACTGGAAATAATATTCTATATTGGATTTTTTATTGCTTTTGTGTCAAATTGCCAATTATA  
CCCTTTCATACGTGGTTACCAGACACCCACGGAGAGGCACATTACAGTACTTGTATGCTTCTAGCCGGAATCTTATTA  
AATGGGAGCATATGGGTTGATTTCGAATCAATATGGAATATTACCGCACGCTCATTCTATATTTTCCCCTGGTTCATGA  
TAGTAGGTACCGTGCAAATAATTTATGCAGCTTCAACATCTCCCGCCAACGGAATTTAAAAAAAAGAATAGCCTATTCC  
TCTGTATCTCATATGGGTTTACATAATTCTAGGAATAGGCTCGATAACCGATACAGGTCTCAATGGAGCCGTTTTACAAAT

AATTTCTCATGGGTTGATTAGT-----  
GCTGCACTTTTTTCTTGGCAGGAACGAGTTATGATAGAATACGTTTTGCTTATCTAGACGAAATGGGCGGACTAGCT--  
-----  
ATACCAATTCCAAAGATCTTCACGCTATTTCAGTATCTTATCGATGGCCTCCCTTGCATTACCCGGCATGAGTGGTTTTGT  
TGCAGAATTGATAGTATTTTTTGGGAATAATTACCAGCCAAAAATTTTTTTAATGCCAAAAATAGTAATCACTTTTGTA  
TGGCAATTGGAATGATATTAACCTCTATTTTATTTCATTATCTATGTTACGG-----  
CAAATGTTCTATGGGTACAAG-----CTATTTAATGCCCAAAC---TCTTAT-----  
TTTTTTGATTCTGGACCACGGGAGTTATTTGTTTTGATCTCGATTCTTCTACCCGTAATAGGTATTGGTATTTATCCCGA  
TTTTCGTTCTCTCACTATCAGCGGACAAGGCCGAAGCTATTATATCGAATTTTTTTTTGTAG-----  
ATGATGCTC-----  
GAGCATGTACTTGTTTTTGAGTGCCTATTTATTTTCGATTGGCATCTATGGCTTGATTACGAGCCGAAATATGGTTCGGGC  
CTTGATGTGCCTTGAACCTATACTAAATGCAGTTAATATCAATTTTTGTAACATTCTCTGATTTTTTTGATAGTCGACAAT  
TAAAAGGAGATATTTTTTCAATTTTTGTTATAGCTATTGCAGCCGCTGAAGCAGCTATCGGATCAGCTATTGTTTCGTCA  
ATTTATCGTAACAGAAAATCGACGCGTATCAATCAATCGACTTTGTTGAATAAGTAGATGGAACATACATATCAATATTC  
CTGGATCATACTTTAGTTCCTTCCAGTCCCTATGTTAATAGGGGTGGGACTTCTATTTTTTCCGACCGCAACAAAA  
ATCTTCGCCGTATGTGGGCTTTTATTAGTATTTTATTGTTAAGTATAGTTATGATTTTTTTCGATCGATCTATCTATTGAG  
CAAATAGATAGAACTTCGATCTATCAATCCCTAAGGACTTGGACCATCACTAGTGATTTGTCTTTTCGAGTTCGGATACTT  
TATTGATCCACTTACTTCTATTATGTCAATATTAATCACTACAGTTGGAATTCTGGTCTTATTTATAGTGACAATTATA  
TGTCTCATGATCAAGGATATTTGAGATTTTTTGGCTTATATGAGTTTTTCAATGCTTCAATGTTAGGATTAGTTACAAGT  
TCGAATTTACATAAAATTTATATTTTTTGGGAATTGGTTGGAATGTGCTCTTATCTATTAATCGGGTTTTGGTTCACACG  
ACCTATTGCGGCAGGCGCTGTCAAAAAGCATTGTAACTAATCGTGTAGGGGATTTGGATTATTATTAGGGATCTTAG  
GTCTTTATTGGCTAACAGGCAGTTTTCGAATTTCCGGATTTGTTGAAATATTGAAAACTTGATTTAT-----AAT---  
AATGAG-----  
GTTAACCTTTTTATTTGTTACTTTGTGTGCATTTCTATTATTTGCCGGCCCGGTTGCTAAATCCGCGCAATTCCTCTTCA  
TGTATGGTTACCCGATGCCATGGAAGGGCCTACTCCTATTTCCGGCTCTTATCCATGCTGCTACTATGGTAGCGGGGAA  
TTTTTCTTGTAGCTCGGCTTCTTCCACTTTTCATAGTCATACCATAACGCAATGAATCTAATATCTTTGATAGGGATAATA  
ACAGTATTTTAGGAGCTACTTTAGCTCTTGTCTCAACAAGATATAAGAGAGGTTAGCTTATTCTACAATGTCTCAATT  
GGGTATATGATGTTAGTCTTAGGTATGGGGTCTTATCGAGCCGCTTATTTTCAATTTGATTACTCATGCATATTCCAAAG  
CCTTGTGTGTTTTAGGATCCGGATCAATTTATTCATTCAATGGAAGCTATTGTTGATATTTCCAGATAAAAAGCAAGAT  
ATGGTCTTATGGGTGGGTTAAGAAAGCATGTGCCGATTACAAAACCCTTTTTTAGTAGGTTACTCTTTCTCTTTGTGG  
TATTCCACCTCTCGCCTGTTTTTGGTCCAAGGATGAAATCTTAATGATACTTGGTTGTATTCCGGATTTTCGCAACAA  
TAGCTTTTTTTCACAGCCGGATTAACCGCATTTTATATGTTTCGAATTTATTTACTTACTTTTTGAGGGGCCTTTCAACTTT  
TGCTTGCAAAATTACAGTGCCAAAAAAGAAATTCCTTATATTCAATATCTCTATGGGGTAAAGAAGAACCAAAACCGAT  
TAAA-----AACAAA-----TTTCATTTAGTTGCTTTATTAACA-----ATGAATAATAAT-----  
AAAAGGGCTTCTTTT-----TTTGCGAAGAAG---ACT---CAT---CGA-----ATTGCTAGTACTGTA--  
-ACAAAT-----ATG-----CCCTTTATTACTATTTTT-----CCTTTTGGC---GCT-----  
GCCAAG-----ACT---

Coffea

CTCATTGCTATTACTCAAACAAGCATGAAACGTATGCTTGCATATTCGTCCATAGGTCAAATCGGATATGTAATTATTGG  
AATAATTGTTGGAGACTCAAATGATGGATATGCAAGCATGATAACTTATATGCTCTTCTATATCTCCATGAATCTAGGAA  
CTTTTGTCTGCATTGTATTATTTGGTCTACGTACCGGAACAGATAACATTGAGATTATGCAGGATTATACACGAAAGAT  
CCTTTTTGGCTCTCTCTTTAGCCCTATGTCTTTATCCCTAGGAGCCCTGCCTCCACTAGCAGGTTTTTTTCGGAAAAC  
CTATTTATTCTGGTGTGGATGGCAGGCAGGCCTATTTTCTTGGTTTTAATAGGACTCCTTACAAGCGTTGTTTCTATCT  
ACTATTATCTA-----AAAATAATCAAGTTATTAATGACT-----  
GGACGAAACCAAGAAATAACCCCTCACGTGCGAAATTATAGAAGA-----TCTCCT-----TTA-----  
AGATCAAACAATTCCATCGAATTGAGTATGATTGTATGTGTAATAGCATCTACTATACCAGGAATATCAATGAACCCGAT  
TATTGCAATTGCTCAGGATAGCCTTTTTTAG-----  
ATGTTTCTTCTTTACGAATATGATATTTTTTGGACATTTCTAATAATATCA-----  
AGTCTTATTCTATTTTGGCATTTTTTATTTCCGGAATTTTAGCCCCGATTAGCAAAGGGCCGGAGAACTCTCTAGTTA  
TGAATCGGGTATAGAACCAATAGGCGACGCTTGGTTACAATTTCGAATCCGTTATTATATGTTTGTCTCTAGTTTTTGTG  
TTTTTGATGTTGAAACAGTTTTTCTTTATCCATGGGCAATGAGTTTCGATATTTTGGGTGTATCTGTATTTATAGAAGCT  
TTAATTTTTGTACTTATCTTAATAGTTGGTTAGTTTATGCATGGCGAAAGGGGCATTGGAATGGTCTTAG-----

-----ACGAATTATTTT-----  
CCTTGGTTAACAATAATTGTAATTTTGCCAATATTTGCAGGTTCTTAATTTTTTTTCTTCCC-----  
CATAGAGGAAATAGG-----  
GTCATCCGTTGGTATACTATATTTTATATGTATTTTCGAACTCCTTCTAACGGCCTATAACATTCTGTTATCATTTT-----  
-----CAAACAGATGATCCATTAATCCAACCTGATGGAGGATTATAAATGGATAACAG---  
TTGTTTGGATTTCCATTGGAGATTAGGAATAGATGGACTTTTCTATAGGACCTATTTTACTAACGGGATTTCATCACCCTTT  
AGCGACTTTAGCAGCTTGGCCGGTACTCGGGATTCTCGGTTATTTAATTTCTGATGTTAGCGATGTACAGTGCTCAA  
TAGGATTATTTTCTTCTCGAGACCTTTTACTTTTTTTTATTATGTGGGAGTTAGAATTAATTCCTGTT---  
TATCTACTTCTATCTATGTGGGGAGGAAAGAAACGTCTGTACTCGGCTACAAAATTTATTTTGTATACGGCGGGGGTTC  
TATTTTCTCTTAATGGGAGTTTTGGGTATCGGTTTATATGGTTCTAATGAACCAACATTAATTTTGAACATCAGCCA  
ATCAGTCGTATCCTCTTCCCTTGGAAATAATATTTCTATATGGATTTTTTATTGCTTTTGTGAAATTCCTATTATA  
CCCCTACATACATGGTTACCAGATACCCACGGGGAAGCACATTACAGCACTTGTATGCTTCTAGCCGGAATCTTATAAA  
AATGGGAGCATATGGGCTGGTTCGGATCAATATGGAATTATTATCTCACGCCATTCTATATTTTTCGCCCTGGTTACTGA  
TAGTAGGCACAATACAAATAATCTATGCAGCTTCAACATCTCTTGGCCAACGTAATTTAAAAAAAAGAATAGCTTATTCT  
TCCGTATCTCATATGGGTTTATAATTATAGGAATTGGTTCTATAACTGATACCGGACTCAATGGAGCTCTTTTACAAAT  
AATCTCTCATGGATTTATTGGT-----  
GCTGCACTTTTTTTCTTGGCAGGTACGACTTATGATAGAATACGTCTTGTTTACCTTGACGAAATGGGCGGAATAGCT--  
-----  
ATCCTAATGCCAAAAATATTCACGATATTTAGTACCTTTTCCATGGCGTCCCTTGCAATTACCGGTATGAGTGGTTTTGT  
TGCCGAATTGATAGTATTTTTTGGAAATAATTACCAGCCAAAAATATCTTTTAAATGCCAAAAATACTAATTACTTTTTGTAA  
TGGCAATTGGAATGATATTAACCTCTATTTTATTATTCTATGTACGC-----  
CAGATGTTCTATGGATAACAAG-----TTCTTTAATATTCCAAAC---TCTTAT-----  
TTTTTTGATTCTGGACCACGCGAGTTATTTCTTTTCGATTTCTCTATTTTTTACCCGTACTCGGCATTGGCATGTACCCCGA  
TTTCATTTTTTCACTGTCTAGTTGACAAAGTCAAGTTATTCTATCTAACTCTTTTTTCTAAATAG-----  
ATGATGCTC-----  
GAACATGTACTTGTTTTGGAGTGCCTATTTATTTTCTATCGGTATCTATGGATTGATCACAAGTCGAAATATGGTTAGAGC  
TCTTATGTGTCTTGAACCTATATTGAATGCAGTTAATATCAATTTTGTAAACATTTTCTGATTTTTTGTATAATCGTCAAT  
TAAAAGGAGACATTTTTTCAATTTTTTGTATAGCTATTGCAGCCGCTGAAGCGGCTATTGGACTGGCTATTGTTTTATCA  
ATTTATCGTAACCGAAAAATCAACTCGTATTAACCAATCGAATTTGTTGAATAACTAGATGCAACAGACATATCAATACGG  
GTGGATCATCCCTTTTCACTTCCAATTTCTATATTAATAGGGGTTCGGACTTCTTCTTTTTCCGACGGCAACAAAA  
ATCTTCGTCTGATGTGGTCTTTTTCAGAGTGTTTTTATTGTTAACTATAGTCATGATTTTTTCAATCAATCTGTCTATT  
CAAATAAATAGCAATTCGATCTATCAATATGTATGGTCTTGGATCATTAAATAATGATTTTTTCTTTAGAAATTCGGCTATTT  
GATCGATCCGCTTACTTCTATTATGTCAATATTAATAACTACCGTTGGAATTATGGTTCTTATCTATAGTGATAATTATA  
TGGCTCATGATCAAGCATATTTGAGATTTTTTGGCTTATATGGGTTTTTTCAGTACTTCCATGTTAGGATTAGTTACTAGT  
TCGAATTTGATACAAATTTATATTTTTTGGGAATTGGTTGGAATGTGTTCTTATTTATTAATAGGGTTTTGGTTTTACACG  
ACCTCTTGCTGCAATGCTTGGCAAAAAGCTTTTGTGACTAATCGTATAGGGGATTTTGGCTTATTATTAGGAATTTT  
GTTTTTACTGGATAACGGGTAGTTTTGAATTTCTGATTTATTTCGAAATATTCATAACTTGATTTAT-----GAT---  
AATGAA-----  
GTCAATTCCTTTGTTTGTACTTTGTGTGCTGGTCTAGTATTTGCCGGTGCCGTTGCTAAATCGGCACAATTTCCCCTTCA  
TGTGTGGTTACCTGATGCCATGGAAGGGCCCACTCCTATTTCTGCTCTTATACACGCTGCTACTATGGTAGCAGCGGGAA  
TTTTTCTTGTAGCTCGGCTTATTCCTCTTTTTCATAGTTATACCTTACATAATGAATTTTATTTTCGTTGATAGGAATAATA  
ACAGTATTATTAGGAGCTACTTTAGCTCTTGCTCAAAAAGACATTA AAAAGAGGATTAGCTTTTTCCACAATGTCTCAATT  
GGGTTATATGATGCTAGCTCTAGGTATGGGATCTTATCGAAGTGCTTTATTTTCAATTTGATTACTCATGCCTATTCCAAAG  
CATTATTATTTTAGGATCTGGATCCGTTATTCATTCAATGGAAACAATTGTTGGATATTCTCCTTATAAAAAGTCAAAAT  
ATGGTTCTTATGGGAGGTTAACAAGCATATACCAATTACCAAAAATACTTTTTTATTAGGTACACTTCTCTTTGTGG  
TATTCACCCTTGGCTTGTTTTTGGTCCAAAGATGAAATCTTAATGATAGTTGGTTGTATTCAACGATTTTCGCAATAA  
TAGCTTGGGCTACCGCGGATTAACCGCATTTTTATATTTTTTCGGATATATTTACTTACTTTTTGAAGGGCATTTAAGTGTT  
CATTTTTCAAAATTACATTGGTAAAGAAAAAGTATTTTCTATTCAATATCTCTATGGGGTAGGGGAGCTTCGAAAAAAAT  
TAAC-----AACAAAT-----TTTTCT-----TTATCAACA-----ATGAATAATATT-----  
GAAAGTTCTTCTTTT-----TTGAAAAAAAAG---ACA---TAT---CCA-----ATTGCTGAAAATGTT--  
-CGAAAT-----GTGACA-----CGTCCCTTTATTACTATTACT-----CATTTTGGAG---AAT-----  
AAAAAG-----TTT---  
TATTCCTATCCTTATGAACCAGACAATACTATGTTATTCCCTTTACTTATATTGGGTCTATTTACTTTGTTTCGTTGGATC  
TATAGGAATT---CCTTTC-----  
AATCAAGAAGGAGTAGATTTARATATATTATCCAAATGGTTAACTCCATCTATA-----  
AATCTTTTGCACCAAAAAGTTGAGTAAT-----TCGATGGATTGG-----  
TACGAATTTTGGAAAGATACAGTATCTTCTGTCTAGTATAGC

Cucumis

CTCATTGCTATTACTCAAACAAGCATGAAACGTATGCTTGGCTATTTCGTCCATCGGTCAAATCGGATATGTAATTATTGG  
AATAATTGTTGGAGACTCAAATGGTGGATATGCAAGCATGATAACTTATATGCTCTTCTATATCGCCATGAATCTAGGAA  
CTTTTGGCTCGCATTGTATCATTGGTCTACGTACCGGAACTGATAACATTTCGAGATTATGCAGGATTATACACAAAAGAT  
CCTCTTTTGGCTCTCTCTTTAGCCCTATGTCTCTTATCCTTAGGAGGTCTTCTCCACTAGCAGGTTTTTTTCGGAAAAC  
TCATTTATTCTGGTGTGGATGGCAGGCAGGCCTATATTTCTTGGTTTTCAATAGGACTACTTACGAGCGTTGTTTTCTATCT  
ACTATTATCTA-----AAAATAATCAAGTTATTAATGACT-----  
GGACGAAACCAAGAAATAACCCCTCACGTGCGAAATTATAGAAGA-----TCTCCT-----TTA-----  
AGATCAAACAATCCATCGAATTGAGTATGATTGTATGTGTGATAGCATCTACTATACCAGGAATATCAATGAACCCGAT  
TATTGAAATTGCTCAGGATACCCTTTTTTAG-----  
ATGTTTCTGCTTTACGAATATGATATTTCTGGGTATTTCTAATAATATCA-----  
AGTGTATTCTTCTATTTTGGCATTCTAATTTCTGGAGTTTTAGCCCTCTTAGCAAAGAGCCAGAGAAACTTTTCGAGTTA  
TGAATCGGGAATAGAACCAATGGGCGATGCTTGGGTACAATTTAGAATCCGTTATTATATGTTTGGCTCTAGTTTTTGTG  
TTTTTGATGTTGAAACAGTTTTTCTTTATCCGTGGGCAATGAGTTTTGATGTATTAGGGGTATCCGTCTTTATAGAAGCT  
TTAATTTTTCGTGCTTATCCTAATTGTCGGTTTTAGTTTTATGCATGGCGAAAAGGAGCATTGGAATGGTCTTAG-----  
-----ACGAATTATTTT-----  
CCTTGGTTAACAACAGTTGTAGTTTTTCCAATATTTGCGGGTTTATTACTTTTTCTTTTTCCCT-----  
CATAGAGGAAATAAA-----  
GTAATGAGATGGTATACTATATGTATCTGTGTACTCGAGCTGCTTCTAACAACCTATGCGTTTTGTTATCATTTC-----  
-----GAATTAGACGATCCATTAATCCAATTGATGGAGGATTATAAATGGATCCCT----  
TTTTTGGATTTTTACTGGGAGATTGGAATCGATGGACTTTCCATAGGACCCATTTTACTGACGGGGTTTTATCACCACHTT  
AGCTACTTTAGCGGCTTGGCCAGTTACTCGAGATCCCGATTATTCTATTTTCTAATGTTAGCAATGTATAGCGGTCAA  
TAGGATCATTCTGCTCGAGACCTTACTATTTTTTATCATGTGGGAGTTTGAATTAATCCCGTT---  
TATCTACTTCTATCGATGTGGGGCGGAAAGAAACGGTTGTATTTCAGCTACAAAGTTTTATTTTGTACACTGCGGGAGGTT  
CATTTTTTTGTAAATGGGAGTTCTGGGTATCGGTTTATATGGTTCTAATGAACCAACTTTAAATTTTGAACATCAGCTA  
ATCAATCGTATCCTATAGCACTGGAAATACTATTCTATATCGGATTTCTTATTGCTTTTGGCTGTCAAATCACCGATTATA  
CCCTTACATACATGGTTACCAGATACCCACGGAGAGGCACATTACAGTACTTGTATGCTTCTATCCGGAATCTTATTAGA  
AATGGGAGCATAATGGATTGGTTCCGGATCAATATGGAATTATTACCCACGCCCATTCTATCTTTTACCCTGGTTGATCA  
TAGTAGGCAATAATCAAATAATCTATGCAGCTTCAACATCTTCCGGTCAACGCAATTTAAAAAAAAGAATAGCTTATTCC  
TCCGTCTCATATGGGTTTTATAATTTATAGGAATTGGTTCTATAAGCGATACGGGACTGAATGGAGCTATTTTACAAT  
AATCTCTCATGGATTTATTGGC-----  
GCTGCGCTTTTTTTCTTAGCGGGAACAAGTTATGATAGAATACGTCTGGTTTTATCTTGATGAAATGGGAGGACTGGCT--  
-----  
ATCCCAATCCAAAAATATTTACGACTTTCAATATCTTATCGATGGCTTCCCTTGCAATTGCCCGGTATGAGCGGTTTTGT  
TGCAGAATTAATAGTCTTTTTTGGAAATAATTACCAGCCAAAAATATCTTTTAAATGACAAAAATGGTAATTACTTTGGTAA  
TGGCAATTGGAATTATATTAATCCCATTTATTTATTATCTATGTTACGC-----  
CAGATGTTCTATGGATATAAG-----CTTTTTAATGCTAAAAAT---TCTTAT-----  
TTTTTTGATTCCGGACCACGAGAATTGTTTGGTGCATCTCTATCCTTATACCTGTCATAGGTATTGGTATTTATCCAGA  
TTTTGTTTTCTCATTATCAGTTGACAAGGTGCAAGCTATTTTATCTAATTTTGGCTAGATAG-----  
ATGCTC-----  
GAACATGTACTTATTATAAGTGCCTATTTATTTTCTATCGGTATCTATGGATTGATCACGAGCCGAAATATGGTTAGGGC  
CCTTATGTGTCTTGAGCTTATACTGAATGCAGTTAATATGAATTTTCGTAACATTTTCTGATTTTTTTGATAGTCGCCAAT  
TAAAAGGGAATATTTTCTCAATTTTTGTTATAGCTATTGCAGCCGCTGAAGCAGCTATTGGCCCAGCTATTCTTTCGTCA  
ACTTATCGTAACAGAAAATCAACTCGTATCAATCAATCGAATTTGTTGAATAAGTAGATGGAATATACATATCAATATTC  
ATGGATCATAACCGTTCATCTCACTTCCAATTCCTATCTTAATAGGAGTGGGCCTTCTACTTTTTCCGACGGCAACCAAAA  
ACCTTCGACGCTCTGTGGTCTGTTCCGAGTATTTTATTGTTAAGTATAGTTATGATTTTTGCCGTTTATCTGTCTATTGAT  
CAAATAAATACTAGTTATATCTATCAATATGTATGGTCTTGGACTATCAATAATGATTTTTTCTTTAGAGTTGGGCTACTT  
CATCGATCCACTTACTTGTATTATGGCAATATTAATCACGACTGTTGGAATTATGGTTCTTTTATAGTGACAATTATA  
TGTCTCATGATCAAGGATATTTGAGATTTTTTGGTATATGAGTTTTGTTCAATACGTCAATGTTGGGATTAGTTACTAGT  
TCGAATTTGATCCAAATTTATATTTTTTGGGAATTGGGTGGAATGTGTTCTTATCTATTAATAGGTTTTTGGTTCACTCG  
ACCTAGTGCAGGCAATGCTGGTCAAAGGCATTTGTAACATAATCGCGTAGGGGATTTTGGTTTTATTATTAGGAATTTTAG  
GTCTTTATTGGACAACGGCGAGTTTTGAATTTCCGGATTTATTTCAAATATTCAATAACTTGATTGAT-----AAT---  
AATGAG-----  
GTAAATTTCTTATTTCTTACTTTGTGCGCCGTCCTATTTTGCAGGTGCTGTTGCTAAATCTGCTCAATTTCTCTTCA  
TGTATGGTTACCCGATGCTATGGAGGTCCTACCCCATTTTCGGCTCTTATACATGCTGCTACCATGGTAGCAGCGGGAA  
TTTTTCTTGTGCGCCGGCTTCTTCCGCTTTTTATAGCAATACCTTACATCATGAATCTAATAGCTTTGATAGGTATAATA  
ACAGTACTATTTGGAGCTACTTTAGCTCTTGCTCAAAAAGATATTAAGAGAAGTTTAGCCTATTCTACAATGTCTCAATT

GGGCTATATGATGTTAGCTTTGGGTATGGGGTCATAACCAGGCTGCTTTATTTTCATTTGATTACTCATGCTTATTCAAAG  
CATTGTTGTTTTTAGGATCGGGGTCCATTATTTACTCAATGGAATCGGTTGTTGGATATTCTCCAGATAAAAAGTCAGAAT  
ATGTTTCTTATGGGTGGTTAAACAAAGCATGTGCCAATTACAAAAATGCTTTTTTATTAGGTACCCTTTCTCTTTGTGG  
TGTTCCACCCCTTGCCTGCTTTTGGTCCAAAGATGAAATTTCTTAATGATAGTTGGTTGTATTACCGATTTTCGCAATAA  
TCGCCTGTTCCACAGCAGGATTAACAGCATTATATGTTTTCGCATTACTTACTTACTTTTGGATGGACATTTAAACCTT  
TATTGTA AAAACTACAGTGGAAAAACAATAACTCCCTTTATTCAATATCATTATGGGGTAAAGAAGGATCAAAAATCAT  
TAAA-----AAAAAC-----TTCCCTTTCTTCTCATTATTAACA-----ATGAATAATAA-----  
GAAAGGTCTTCTTTT-----TGGATGAAAAA---ACAATATAT---CCA-----TTTAATAGTAATGTA--  
-ACAAA-----AAAATG-----CGCCCTTTTGTAGTAGTCTT-----CATTTTAGT---ACT-----  
AAAAAT-----ACT---

TTTTACTATCCCTATGAATCAGAGAATACTATGCTATTTCCGATGTTTGTGTTATCCCTATTTACTTTGTTTGTGGAGT  
CATAGGAAGC---CCGTTCACTCAATTC-----  
AATCAAGAAGCAATTGATTTGAATATATTAGACAAATGGTTAACTCCGTCTATA-----  
AACTTGTTACACGAAAGTTCAAAAGAT-----TCTGAAAATTGG-----  
TATGAATTTGTTAAAAATGCAACTTTTTCTGTGACTATAGC

Daucus

CTTATTGCTATAACTCAAACAAGCATGAAACGTATGCTTGCATATTCGTCCATAGGTCAAATCGGATATGTAATTATTGG  
AATAATTGTTGGAGACTCAAATGATGGATATGCAAGCATGATAACTTATATGCTGTTCTATATCTCCATGAATCTAGGAA  
CTTTTGTGCTTGCATTGTATTATTTGGTCTACGTACCGGAAGTATAACATTTCGAGATTATGCAGGATTATATACGAAAGAT  
CCTTTTTTGGCTCTCTCTTTAGCCCTATGTCTCTTATCCCTAGGAGGTCTTCCCTCCACTAGCAGGTTTTTTCGGAAA  
CTATTTATTCTGGTGTGGATGGCAGGCAGGCCTATATTTCTTGGTTTTAATAGGACTCCTTACAAGCGTTGTTTCTATCT  
ACTATTATCTA-----AAAATAATCAAGTTATTAATGACT-----  
GGACGAACCCAAGAAATAACCCCTCACGTGCGAAATTATAGAAGA-----TCTCCT-----TTC-----  
AGATCAAACAATTCCATCGAATTGAGTATGATTGTATGTGTGATAGCATCTACTATACCAGGAATATCAATGAACCCGAT  
TATTGCAATTGCTCAGGATACCCTTTTTTAG-----

ATGTTTCTGCTTTACGAATATGATATTTTTTGGGCATTTCTAATAATATCA-----  
AGTCTTATTCCTATTTTGGCATTTCGTTTTCCGGAGTTTTAGCCCCGATTAACAAAGGGCCTGAGAACTTTCTAGTTA  
TGAATCGGGTATAGAACCAATGGGCAACGCTTGGTTACAATTTCAATCCGTTATTATATGTTTGTCTAGTTTTTGTG  
TTTTTGATGTTGAAACAGTTTTTCTTTATCCATGGGCAATGAGTTTCGATGTATTAGGTATATCTGTATTTGTAGAAGT  
TTAATTTTCTGCTTATCTTAATTGTTGGTTTAGTTTTATGCATGGCGAAAAGGGCATTGGAATGGTCTTAG-----  
-----ACGAATTTTTTT-----  
CCTTGGTTAACAATAATTGTAATTTTGCCAATATTCGCAGGCTCCATAATTTTTATTTCTTCCC-----  
CATAGAGGAAATAGA-----  
GTAATTAGGTGGTATACTATATGTATATGTATTCTAGAACTCCTTCTAACGACCTATGCATTCTGTTATCACTTT-----  
-----CAATTGGATGATCCATTAATCCAATTAGTCGAGGACTTTAAATGGATCGAT---

TTTTTTGATTTCCATTGGAGATTAGGAATAGATGGACTTTCTATAGGACCCATATTACTAACGGGATTCATCACTACTTT  
AGCTACCTTAGCGGCTTGGCCAGTTACTCGAGATTCTCGATTATTTTCATTTTCTAATGTTAGCAATGTACAGCGGTCAA  
TAGGATTATTTGCTTCTCGAGACCTTTTACTGTTTTTTCATCATGTGGGAGTTAGAATTAATTCGGTT---  
TATCTACTTTTATCCATGTGGGGGGGAAAGAAACGTCTTTACTCGGCTACAAAATTTATTTTATATACAGCGGGGGGTT  
CGTTTTTCTCTTAATGGGAGTTTTGGGTGTCGGTTTATATGTTTCTACTGAGCCGACATTAACCTTTGCAACATTAGTTA  
ATCAGTCATATCCTGTGGCGTTGGAAATAATATTATATATTGGATTTTTTATTGCTTTTGTGTCAAATCGCCGATTATA  
CCTCTACATACATGGTTACCAGATACCCATGGAGAAGCACATTACAGTACTTGTATGCTTTTAGCCGGAATCTTATTA  
AATGGGAGCGTATGGGTTGATTCCGATTAATATGGAATTATTATCCCACGCCATTCTATATTTTCTCCGTGGTTGGTGA  
TAGTAGGCACAATACAAATAATATATGCAGCTTCAACATCTCTTGGCCAACGTAATTTAAAAAAGAATAGCCTATTCC  
TCTGTATCTCATATGGGTTTACTACTTATAGGAATTGGTTCTATAAACGATACGGGACTCAATGGAGCCATTTTACA  
AGTCTCTCATGGATTTATTGGT-----  
GCTGCGCTTTTTTCTTGGCAGGAACGAGTTATGATAGAATACGTCTTGTATTCTCGACGAAATGGGTGGAATAGCT--  
-----

ATCCCAATGCCAAAAATATTCACGATGTTACGAGCTTTTCAATGGCTTCTCTTGCATTACCGGGCATGAGTGGTTTTGT  
TGCAGAATTTATAGTTTTTTTTTGGAAATCATTACCAGCCAAAAATATCTTTTTAATATCAAACTAGGAATTACTTTGTAA  
TGGCAATTGGAATTATATTAACTCCTATTTATTATTATCTATGTTACGC-----  
CAGATGTTCTATGGATAACAAG-----CTATTTAATGCTCCAAAC---TCATAT-----  
GTTTTTGTATTCTGGACCACGAGAGTTATTTGTTTTCGATCGCTATCTTTATACCCGTAATAGGTATTGGTATGTACCCTGA  
TTTTGTTCTTTCCCTATCAGTTGACAAGGTCGAGGTTCTTTTATCTAATTTTGTATTATAGATAG-----  
ATGATGCTC-----

GAACATGTACTTGTGTTTGGAGTGCCTATTTATTTTCTGTTGGTCTTTATGGATTGATTACGAGTCGAAATATGGTTAGGGC  
CCTTATGTGCTTGAACCTATTTTGAATGCAGTTAATATCAATTTTGTAACTTTTCTGATTTTTTGTATAGTCGTCAT







AGCTACTTTTAGCGGCTTGGCCAGTTACTCGAGATTGCAATTGTTCCATTTTCTGATGTTAGCAATGTACAGCGGTCAAA  
TAGGATCATTTTTCTTCTCGAGACCTTTTACTTTTTTTCATCATGTGGGAGTTAGAATTAATTCCTGTT---  
TACCTACTTTTATCCATGTGGGGAGGTAAGAAACGTCTGTAAGTTCAGCTACAAAGTTTCAATTTTGTACACTGCGGGGGGTTT  
TATTTTTCTCTTAATGGGAGTTCCAGGTATGGGTTTATATGGTTCCAATGAACCAACATTAAATTTGGAAACATCAGCTA  
ATCGATCGTATCCCGCGGCATTGGAAATAATATTCTATTTTGGCTTCTTTATTGCTTATGCTGTCAAATCACCATTATA  
CCCCTACATACATGGTTACCAGATACCCATGGAGAAGCGCATTACAGTACATGTATGCTTCTAGCTGGAATTTTATTAAA  
AATGGGAGCATATGGATTGGTTCCGATCAATATGGAATTATTACCCCATGCTCATTCTATATTTTCTCCCTGGTTGATGA  
TAGTCGGAACGATTCAAATAATCTATGCAGCTTCAACTTCTCCCGGTCAACCCAATTTTAAAAAGCGAATAGCCTATTCC  
TCCGTTTCTCATATGGGTTTCCAAATTATCGGAATTGCTTCCATAACTGATATGGGACTCAATGGAGCCATTTTACAAAT  
CATTTCTCATGGATTATTGGT-----  
GCTGCACTCTTTTTCTTGGCAGGAACGAGTTACGATAGAATAGGTCTTGTATTCTCGACGAAATGGGAGGAATAGCT--  
-----

ATCCCAATGCCAAAAATATTTACCATGTTAGTAGCTTCTCGATGGCTTCTCTTGCAGTCCAGGAATGAGTGGTTTTTTT  
TGCAGAATTGGTAGTCTTTTTTGGAAATAATTACCAGCAGCAAAATACCTTTTAAATGCCAAAAATACTAATTACTTTTTGTAA  
TGGCAATTGGAATGATATTAATCCTATTTATTATTCTATGTTACGT-----  
CAGATGTTCTATGGATACAAA-----CTATTCAATGTTACAAAC---TCCTAC-----  
TTTGTGGATTCTGGACCACGAGAATTTTTGTTTTCGATCTGTATCTTTTACCCGTAATAGGTATCGGTATTTTATCCCGA  
TTTTGTTCTCTCACTATCAGTTGAGAAGATAGAAGCTATTCTATCTAATTACCTTCATAAATCGTTTTTATAAATGATGC  
TC-----

GAGCATGTACTTATTTTGGAGTGCCTATTTATTTTCTATTGGTATTTATGGATTGATCACAAGTCGAAATATGGTTAGAGC  
ACTTATGTGTCTTGGAGCTTATACTGAATGCGGTTAATATGAATCTCATAAAATTTTCTGATTTATTTGATAGTCGACAAT  
TAAAAGGAGACATTTTCTCGATCTTTGTTATAGCTATTGCAGCCGCTGAAGCAGCTATTGGGCCAGCTATTGTTTCGTGCG  
ATCCATCGTAACAGAAAATCAACTCGTATCAATCAATCGAACTTGTGTAATAAATAGATGCAACCCATATATCAATATGC  
ATGGATCATACTTTTCGTTCCACTTCCAGTTACTATGTCAATAGGATTGGGACTTCTGCTTGTTCGACCCGCAACAAAA  
ATCTTCGTGCTATGTGGGCTTTTCCAGTGTTCATTGCTAAGTATAGTTATGGTTTTTTTCCGCCGATCTGTCTGTTCAA  
CAAATAGATGGCAGTTCCATCTATCAATATCTATGGTCTTGGACCATCAATAATGATTTTTTCTTAGAGTTTGGACACTT  
GATCGACCCACTTACTTCTATTATGTCAATACTAATCACTACTGTCGGAATTATGGTTCTTATTTATAGTGACAAGTATA  
TGTCTCATGATCAAGGATATTTGAGATTTTTTGGCTTATATGAGTTTTCATAACTTCTATGTTGGGATTTAGTTACTAGT  
TCCAATTTGATACAAAATTTATATTTTTTGGGAACCTGGGAATGTGTTTCGATTTTATAAATAGGTTTTTGGTTTACACG  
ACCAATTCGACGAAATGCCTGTCAAAAAGCACTTGTAACTAATCGTTAGGGGATTTTGGTTTTATTATTAGGAATCTTAG  
GTCTTTATTGGATAACAGGTAGTTTTCGAATTTCTGATTTTGTTCGAAATCTTCAATAACTTGGATCCAT-----AAT---  
AATGGG-----

GTAAATCTTTATTTGCTACTCTGTGTGCTTCCCTATTATTTCGCTGGTGCAGTTGCTAAATCTGCACAATTTCCCCTTCA  
TGTATGGTTACCTGATGCCATGGAGGGACCCACTCCTATTTTCGCTCTTATACATGCTGCTACTATGGTAGCAGCGGGAA  
TTTTTCTTGTGCTCGACTTCTTCTCTTTTTACAGTTATACCTTACATAATGAATCTAATTTCTTTGATAGGTGTAATA  
ACGGTACTATTAGGAGCTACTTTGGCTCTTGTCAAAGAGACATTAAGAGAAGCTTAGCTTATTCAACAATGTCGCAATT  
GGGTTATATTATGTTAGCTCCAGGGATAGGTTCTTATCGAGCTGCTTTATTCCATTTAATTACTCATGCCTATTCGAAAG  
CATTATTGTTTTTAGGCTCCGGATCCATTATTCATTCAATGGAACCCATTGTTGGATATTCTCCAGATAAGAGTCAGAAC  
ATGGTTCTTATGGGTGGTTTTAAGAAAATATGTACCAATTACAAAATGACTTTTTTATTAGGTACACTTTCTCTTTGTGG  
TATTCCACCTCTTGTGTTTTTGGTCCAAAGATGAAATCTTAATGATAGTTGGCTGTATTACCGATTTTCGCGATAA  
TAGCTTGTGCCACAGCGGGATTAAGTGCATTTTATATGTTTCGGACATATTTACTTACTTTTGGGGGATTTTATATGCG  
CATTTTCAAATACAGTGGCACTCAAATAGTTTCTTTTATTCAATATCTATATGGGGGAAAGAAGCAAAACTGGT  
TAAC-----AGAAAT-----TTGCTT-----TTATCAACA-----ATAAATAAGAAT-----  
GAAAAGGTTTTCTTT-----TTTTCGAAGAAG---ACA---TGT---AAA-----ATTAATGGGAATGTA--  
-CGAAAT-----CTAATG-----CGATCCTTTAGTACT-----CATTTTGAC---AAT-----  
AAAGAC-----ACT---

TCGATGTATCCTCATGAATCAGATAATACAATGCTATTGCCTCTACTTGTGTTGGTCTATTTACTTTGTTGTTGGATT  
CATAGGAATT---CCTTT-----  
GATCAAGGAGTAATGGGTTTGGATATATTATCCAAATGGTTAACCCCATCAATA-----  
AACCTTTTACATCAAATTCGAACTAT-----TCGGTGAATTGG-----  
TATGAATTTGCGACAAATGCATTTTTTTTTCAGTACGATAGC

Eucalyptus

CTCATTGCTATTACTCAAACAAGCATGAAACGTATGCTTGCATATTCGTCCATAGGTCAAATCGGATATGTAATTATTGG  
AATAATTGTTGGAGACTCAAATGGTGGATATGCGAGCATGATAACTTATATGCTGTTCTATATCTCCATGAATCTAGGAA  
CTTTTGTGCTGCAATTGATATTTTGGTCTACGTACCGGAAGTATAACATTTCGAGATTATGCAGGATTATACACGAAAGAT  
CCTTTTTTGGCTCTCTCTTTAGCCCTATGTCTCTTATCCCTAGGAGGTCTTCTCCACTAGCAGGTTTTTTTCGGAAAAC  
CCATTTATTCTGGTGTGGATGGCAGGCAGGCTATACTTCTTGGTTTTCAATAGGACTCCTTACGAGCGTTATTTCTATCT

ACTATTATCTA-----AAAATAATCAAGTTATTAATGACT-----  
GGACGAAACCAAGAAATAACACCTCACGTGCGAAATTATAGAAGA-----TCCCCT-----TTA-----  
AGATCAAACAATTCCATCGAATTGAGTATGATTGTATGTGTGATAGCATCTACTATACCAGGAATATCAATGAACCCGAT  
TATTGCAATTGCTCAGGATACCCTTTTTTAG-----  
ATGTTTCTGCTTTACGAATATGATATTTTCTGGGCATTTCTAATAATATCA-----  
AGTGTATTCCCTATTTTGGCATTTCKAATTTCCGGAATTTTAGCCCCGATTAGCAAAGGGCCAGAGAACTTTTCGAGTTA  
TGAATCAGGTATAGAACCAATGGGCGATGCTTGGTTACAATTTCGAATCCGTTATTATATGTTTGGCTCTAGTTTTTGTG  
TTTTTGATGTTGAAACGGTTTTTCTTTATCCATGGGCAATGAGTTTCGATGTATTGGGGGTATCCGTATTTATAGAAGCT  
TTAATTTTCGTGCTTATCCTAATTGTTGGTTTAGTTTTATGCATGGCGAAAAGGAGCATTGGAATGGTCTTAG-----  
-----ATCACGAATTATTT-----  
CCTTGGTTAACAATAATTGTACTTTTGCCGATATTCGCAGGTTCTTTAATTTTCTTTCTACCT-----  
CATAGAGGAAATAAG-----  
GTAATAAGGTGGTATACTATATGCATATGCTCTTTAGAGCTCCTTTTAACTACCTATAACATTCTGTTATCATTTC-----  
-----CAATTGAACGATCCATTAACCCAATTAACAGAGGATTATAAATGGATTAAT---  
TTTTTTGATTTTTACTGGAGATTGGGAATAGATGGACTTTCTATAGGACCTATTTTACTGACGGGATTTATCACCCTTT  
AGCTACTTTAGCGGCTCGGCCAGTTACTCGAGATTCCCGATTATTCCATTTCTGATGTTAGCAATGTACAGCGGTCAA  
TAGGATCATTCTTCTCGAGACCTTTTACTTTTTTTCATCATGTGGGAGTTAGAATTAATTCCCGTT---  
TATCTACTTCTAGCGATGTGGGGGGAAAGAAACGTCTGTATTCCGCTACAAAATTTATTTTGTACACTGCGGGAGGTT  
CATTCTTCTATTAATAGGGTTCTGGGTATTGGTTTATATGGTTCCAACGAACCAACATTAATTTGGAAACATTATCTA  
ATCAATCGTATCCGGTGGCACTGGAAATAACTCTATATTGGATTTCTTATTGCTTTTTCTGTGAAATTACCGATTATA  
CCCTTACATACATGGTTACCAGACACCCATGGAGAGGCACATTATAGTACTTGTATGCTTCTAGCCGGAATTTTATTA  
AATGGGAGCATATGGGTTGGTTTGAATCAATATGGAATTATTACCTCATGCTCATTCTATATTTTCTCCCTGGTTGATTA  
TAGTAGGCGCAATCCAAATAATCTATGCAGCTTTAACATCTCCTGGTCAACGTAATTTAAAAAAGAATAGCCTATTCC  
TCTGTATCTCATATGGGTTTATAATTATTGGAATTGGCTCGATAACTGATACGGGACTCAATGGAGCCATTTTACAAAT  
AATCTCTCATGGATTTATCGGC-----  
GCTGCTCTTTTTTTCTTGGCAGGAACGAGTTATGATCGAATACGTCTTGTATTCTCGACGAAATGGGTGGAATGGCT--  
-----  
ATCCACCTTCCAAAAATATTACAACTCTTTAGTATCTTATCAATGGCTTCCCTTGCAATTACCAGGTATGAGTGGTTTTCT  
TGCAGAATTGATAGTATTTTTTGGAAATAATTACCAGCCACCAATATCTTTTAAATGCCAAAAATACTAATTACTTTTTGTAA  
TGGCAATTGGAATGATATTAACCTCTATTTATTTATCTATGTTACGC-----  
CAAATGTTCTATGGATACAAG-----TTATTTAATGTTCCAAAC---TCTTAT-----  
TTTTTGGATTTTGGGCCGCGAGAGTTATTTGTTTCCATCTCTATTCTTCTACCAATAATAGCTATTGGTATTTATCCAGA  
TTTCGTTCTTTCACTATCTGTTGACAAAGTCAAGCTATTATATCTAATTATTTTTATCAATAG-----  
ATGATACTC-----  
GAACATGTACTTGTTTTGGAGTGCCTATTTATTTTCTATTGGTATCTATGGATTGATCACGAGTCGAAATATGGTTAGGGC  
CCTTATGTGTCTTGAACCTTATCCTCAATGCGGTTAATAATAAATTTGTAACATTTTTCAGATTTTTTGTATAGTCGACAAT  
TAAAAGGAGATATTTTCTCCATTTTGTATAGCTATTGCAGCCGCTGAAGCAGCTATTGGGTTAGCTATTGTTTCGTCA  
ATTTATCGTAACAGAAAATCAACTCGTATCAATCAATCGAATTTGTTGAATAAATGAATGGAATATACATATCAATATTC  
ATGGATTATCCCTTTCATTCCACTTCCAGTTCCTATGTTAATAGGAGTGGGACTTCTACTTTTTCCAACGGCAACAAAA  
ATCTTCGCCGATGTGGGCTTTTTCTAGTATTTCTTGTAAAGTATAGTTATGATACTTTCCGTCTATCTATCTATTCAA  
CAAATAAATAGAAGTTTTATCTATCAATATGTATGGTCTTGGACCATTAATAATGATTTTTCTTTTCGAGTTCGGTCACTT  
AATAGATCCACTTACTTCTATTATGTTAATATTAATTACTACTGTTGGAATTTTGGTTCTTTTTTATAGTGACAATTATA  
TGTCTCATGATCAAGGATATTTGAGATTTTTTGGCTTATATGAGTTTTTCAATACTTCCATGTTGGGATTAGTTACTAGT  
TCGAATTTGATACAAATTTATATTTTTTGGGAATTAGTTGGAATGTGTTCTTATTTATTAATAGGTTTTTGGTTTACACG  
ACCTAGTGGCGGACTGCTTGTCAAAAAGCGTTTGTAAACGAATCGTGTAGGCGATTTGGTTTTATTATTAGGAATTTAG  
GTCTTTATTGGATAACCGGTAGTTTTGAATTTCCGGATTTGTTCCAAATATTGAATAACTTGATTTAT-----AAT---  
AATGAG-----  
GTTCTTTTTTATTTCTTACTTTGTGTTACTTTCTTTTATTTGAGGTGCAGTTGCGAAATCGGCACAATTTCCCTTCA  
TGTATGGTTACCTGATGCCATGGAAGGCCCTACTCCCATTTTCGGCTCTTATACATGCCGCTACTATGGTAGCAGCGGGCA  
TTTTTCTTGTAGCTCGACTTCTTCTCTTTTTATAATCATACCTTACATAATGAATTTTATATCTTTAATAGGTATAATA  
ACAGTATTATTAGGAGCTACTTTAGCTCTTGGCTCAAAAAGATATTAAGAAGAGGTTAGCTTATTCTACAATGTCTCAATT  
GGGTTATATGATGTTAGCTCTAGGTATGGGGTCTTATCGAGCCGCTTTATTTTCAATTTGATTACTCATGCTTATTCAAAG  
CATTGTTGTTTTTAGGATCCGGATCAATTATTCATTCAATGGAAGCTATTGTTGGATATTCTCCAGATAAAAAGTCAGAAT  
ATGGTTCTTATGGGAGGTTAAAAAAGCATGTACCAATTACAAAACACTGCTTTTTTATAGTGGTACACTTTCTCTTTGTGG  
TATTCCCCCTTGTGTTTGGTCCAAAGATGAAATTTTAAATGATAGTTGGTTGTATTACCTATTTTCGCAATAA  
TAGCTTGTTCACAGCAGGATTAACCGCATTTTATATGTTTTCGAATCTATTTACTTACTTTTGGGGACATTTCAATGTT  
CATTTTCAAATTACAATGGTCAAAAAGTAGTTCTGCTATTCAATATCTCTATGGGGAAAAGAAGTCCAAAAACGAT



Glycine

CTCATTGCTATTACCCAAACAAGCATGAAACGTATGCTTGCCTATTTCGTCCATAGGTCAAATCGGATATGTAATTATTGG  
AATAATTGTTGGAGACTCAAATGGTGGATATGCAAGCATGATAACTTATATGCTGTTCTATATCTCGATGAATCTAGGAA  
CTTTTGCTTGCATTGTATCATTGGTCTACGTACCGGAAGTATAACATTTCGAGATTATGCAGGATTATACACGAAAGAT  
CCTTATTTGGCTCTCTCTTTAGCCCTATGTCTCTTATCCTTAGGAGGTCTTCTCCACTATCAGGTTTTTTTCGGAAAAC  
TCATTTATTCTGGTGTGGATGGCAGGCAGGCTTATATTTCTTAGTTTTCAATAGGACTCCTTACGAGTGTGTTTCTATCT  
ACTATTATTTA-----AAAATAATCAAGTTATTAATGACT-----  
GGACGAAACCAAGAAATAACTCCTCACGTGCGAAATTATCGAAGG-----CCCCCT-----TTA-----  
AGATCAAACAATTCCATCGAATTAAGTATGATTGTATGTGTGATAGCATCTACTATACCAGGAATATCAATGAACCCAT  
TATTGAAATTGCTCAGGATACCCTTTTTTAG-----  
ATGTTTCTTCTTTACGAATATGATATTTTTGGGCATTTCTAATAATATCA-----  
AGTTTTATTCCATTTTTGGCATTCTAATTTCTGGAATTTAGCCCCGATTAGCAAGGGACCAGAGAAAACCTTTCTAGTTA  
TGAATCGGGAATAGAACCAATAGGTGATGCTTGGTTACAATTTCAATCCGTTATTATATGTTTGGCTCTCATTTTTTGTTG  
TTTTTGATGTTGAAACGGTTTTTTCTTTATCCTTGGGCAATGAGTTTCGATGTATTAGGGGTATCCGTATTTATAGAAGT  
TTCATATTCGTGCTTATCCTAATTGTTGGTTTCAATGATGCGAAAGGGGGCATTAGAATGGTCTTAA-----  
-----ACGAATTATTTT-----  
CCTTGGTTAACAACAGTTGTAATTTTGCCAATAGTCCGGGGTTCCTTAATTTTTCTTATTTCCC-----  
CATAAAGGAAATAAG-----  
GTAATTAATGGTATACTATTTGTATATGTTAATTGATCTCCTTATAACATCCTATGTATTTTTGTTATCATTTC-----  
-----GAACTGGATGATCCACTAATCCAATTGACAGAAAATTATAAATGGATCAAT---  
TTTTTTGACTTTTACTGGAGCTTCGGAATAGATGGACTCTCTTAGGACCCATTTTATTGACGGGATTTATCACTACGTT  
AGCTACGTTAGCGGCTCAGCCGGTTACTAGAGAATCCAAATTATTCTATTTCTGATGTTAGCAATGTATAGTGGTCAAA  
TAGGAACATTTTCTTCTCAAGACATTTTACTTTTTTTTTCATCATGTGGGAATTCGAATTAATTCCCCTT---  
TATCTACTTTTATCTATGTGGGGTGGAAAAAACGTTTGTATTTCAGCTACAAAGTTTATTTTGTACACTGCGGGAAGTTC  
TGTTTTTTTTTATTACTGGGAATTCGGGTATGAGTTTCTATAGCTCTAATGAACCAACATTAAATTTTCAATCATTAACTA  
ATCAATCATATCCCCTGGCACTGGAAATAATATTCTATATCGGGTTTTCTTATTGCTTTTGTGTCAAATCACCAATTATA  
CCCTTACATACATGGTTACCAGACACCCACGGAGAGGCACATTACAGCACTTGTATGCTTTTAGCCGGAATATTATTTAA  
AATGGGAGCATATGGGTTGGTTTCAATTAATATGGAATTCCTTATCTCGCGCTCATTCTATATTTTCTCCCTGGTTAATAC  
TATTAGGTTCAATTCAAATAATCTATGCAGCTTCAACATCTCTTGGTCAACGCAATTTAAAAAAAAGAATAGCTTATTCT  
TCAGTATCTCATATGGGTTTCTTACTTTTAGGAATTGGTTCTATAAGCGATACAGGTCTCAACGGGGCTATTTTACAAT  
AATATCTCACGGATTTATTGGC-----  
GCTGCGCTTTTTTTCTTGGCGGGAACGAGTTATGATAGACTACGTCTTCTTTATCTCGACGAAATGGGTGGAATGGCT--  
-----  
ATCCCAATGCCAAAAATATTACGGTTTTTCACTATCTTATCGATGGCTTCTCTTGCATTGCCGGGCATGAGCGGTTTTGT  
TGCAGAATTGATAGTCTTATTGGGAATAATTACTAGCCAAAAATATCTTTTAAATCACAAAAATACTAATAACTTTTGTAA  
CAGCAATTGGAATGATATTAACCTCTATTTTATTATTCTATGTTACGT-----  
CAAATGTTCTATGGATACAAG-----CTTTTTAATACACCAAAT---TCTTAT-----  
TTTTTTGATTCCGGGCCACGAGAATTTTATTTTCAATTTCTATCCTTATACCCGTAATAAGTATTGGCATTATCCAGA  
TTTTATTTTTTTTCAATTTTCGGCTGACAAGGTTGAAGCTATTCTATCTAATTTTTTTTATAG-----  
ATGATATTC-----  
GAGCATGCATTTGTTTTGAGTGCCTATTTATTTTCTATAGGTATATATGGGTTGATCACGAGCCGGAATATGGTTAGAGC  
CCTTATGTGCTTGAACCTATACTGAATGCAGTTAATAAATCTCGTAACCTTTTCTGATTTTTTTTGTATAGTCGACAAT

TAAAAGGAAATATTTTTTCAATTTTTGTTATAGCTATTGCAGCTGCTGAAGCAGCTATCGGACCGGCTATTGTTTCCTCA  
ATTTATCGTAATAGAAAATCAACCCGTATCAATCAATCAAATTTATTGAATAAATAAATGGAATATACACATCAATATTC  
ATGGATCATACTTTTTATTCCATTTCCAGTTCCTATGTTAATAGGAGTGGGACTTCTACTTTTTCCGACAGCAACCAAAT  
ATCTTCGCCGTATGTGGGCTTTTTCTAGTATTTTTATTGTTAACTATAGTTATGATGTTTTCGCTTGATTTGTCTATTCA  
CAAATCAATAATAGTTCTTTTTATCAATATGTATGGTCTTGGACCATAAATAATGATCTTTCTTTAGAGTTTGGGTA  
GATCGATTCACCTTACTTCTATTATGTCAATATTAATTACTACTGTTGGCATTCTGGTTCTTATTTATAGTGATAATTATA  
TGTCTCATGATCAAGGATATTTGAGATTTTTTGCTTATCTGACTCTTTTTAATATTTCAATGTTGGGATTAGTTACTAGT  
TCGAATTTGATACAAATTTATGTTTTTTGGGAATTGGTTGGAATGTGTTCTTATTTATTAATAGGCTTTTGGTTCCACAG  
TCCTATTGCGGCAAATGCTTGTCAAAAAGCATTGTAACTAATCGTGTGCGGGGATTTGGTTTATTATTGGGAATTTAG  
GTCTTTATTGGATAACGGGTAGTTTGGAAATTTGGGATTTGTTTTCAAATAATAAATAACTTGATTTAT-----AAA---  
AATGAA-----

GTTAATATTTTTTTTTCTTACTTTGGTTGCCCTCTTGCTATTTTTGTGGCTCAGTCGCTAAATCCGCCCAATTTCTCTTCA  
TGTATGGCTACCAGATGCTATGGAAGGGCCTACTCCAATTTCCGCCCTTATACATGCTGCTACTATGGTAGCCGCGGGAA  
TTTTCTTGTAGCTCGACTTCTTCTCTTTTCATAGTTCTACCTGCAATAATGAACGGAATAGCTTTTATAGGTATAATA  
ACGGTAGTATTAGGAGCTACCTTAGCTATTGCTCAACAAGATATTAAGAAAAATTTGGCTTATTCCACAATGTCTCAATT  
GGGTATATGATGTTAGCTCTCGGTATGGGATCTTATCGAGCCGCTTTATTTTCAATTTGATTACTCATGCTTATTCAAAG  
CATTGTTGTTTTTAGGATCTGGATCCATTATTCAATGGAAGCTCTTGTGCGATATTCTCCAGCTAAAAGTCAAAAT  
ATGTTTCTTATGGGCGGTTAACAACAAACATGTACCAATTACAAAACTTCTTTTTTAGTGGGTACGCTTTCTCTTTGCGG  
TATTCCACCTTTTGCCTGTTTTTGGTCTAAGGATGAGATTCTTAATGATAGTTGGTTGTATTACCCATTTTTGCAATAA  
TAGCTTGTGTACAGCAGGATTAAGTGCATTTTATATGTTTCGGATCTATTTACTTGTTTTTGAAGGATATTTAAACGTT  
CATTTTTTAAATTTCAATGGAAAAAAAATAGTTTCAATCTATTCAATATCTTTATGGGGGAAGAAAGAAGTAAAACAGAA  
ATTAAAAAACAAAAAT-----TTT---TTCTTAGCTTTACTAAGA-----ATGAAAAATAAT-----  
GAAATGACTTCCTTT-----TTTATCCGGAAG---ATA---TAT---CCACATCGCATTAAATCAAAATGTA--  
-AAAAAC-----ATAACT-----TGTCTTTTTTTTGATATTAAT-----TATTTTGGC---ACT-----  
AAAAAA-----

ACTGCTTGTTTTATATCCAAATGAATCGGACAATACTATGCGATTTTCTATCCTTGTTTTAGTGCTCTTTACTTTATTTCGT  
TGGGACCATAGGAATT---TCTTTC-----  
AGCTACAAAGGAATAGATTTTGATATATTATCAAAATGGTTAATTCCTTTATA-----  
GACCTTTTACATAAAAATTTCAAAAAAT-----TTTGTGGATTGG-----  
TATGAATTTTTGACCAACGCAGCTTTTTCGGTGATTCTTAC

Gossypium

CTCATTGCTATTACTCAAACAAGCATGAAACGTATGCTTGCATATTCGTCCATAGGTCAAATCGGATATGTAATTATTGG  
AATAATTGTTGGAGACTCAAATGGTGGATATGCGAGCATGATAACTTATATGCTGTTCTATATCTCCATGAATCTAGGAA  
CTTTTGCTTGCATTGTATTATTTGGTCTACGTACCGGAACACTGATAACATTGAGATTATGCAGGATTATACACAAAAGAT  
CCTTTTTTGGCTCTCTCTTTAGCTCTATGTCTCTTATCTCTAGGAGGTCTTCTCCACTAGCAGGTTTTTTTCGGAAA  
CCATTTATTCTGGTGTGGATGGCAGGCAGGCCTATATTTCTTGGTTTTCAATAGGACTCCTTACGAGCGTTGTTTCTATCT  
ACTATTATCTA-----AAAATAATCAAGTTATTAATGACT-----  
GGACGAAACCAAGAAATAACCCCTCACGTGCGAAATTATAGAAGA-----TCCCCT-----TTA-----  
AGATCAAACAATTCATCGAATTGAGTATGATTGTATGTGTGATAGCATCTACTATAACCAGGAATATCAATGAACCCGAT  
TATTGCAATTGCTCAGGATACCCTTTTTTAG-----  
ATGTTTCTGCTTTACGAATATGATATTTTCTGGGCATTTCTAATAATATCA-----  
AGTGCTATTCTATTTTGGCATTCTAATTTCTGGAGTTTTAGCCCCGATTAGAAAGGGTCCAGAAAACTTTCTAGTTA  
TGAATCGGGTATAGAACCAATGGGCGATGCTTGGTTACAATTTCGAATCCGTTATTATATGTTTGTCTAGTTTTTTGTTG  
TTTTTGATGTTGAAACGGTTTTTCTTTATCCATGGGCAATGAGTTTCGATGTATTGGGGGTACCCGATTTCATAGAAGCT  
TTCATTTTCTGCTTATCCTAATTGTTGGTTTCAGTTTATGCATGGCGAAAAGGAGCATTGGAATGGTCTTAG-----  
-----ACGAATTATTTT-----

CCTTGGTTAACAATAATTGTATTTTTACCAATATCTGCAGGTTCTTTACTTTTTCTTTCTTCT-----  
CATAAAGGAAATAAG-----  
CTAATTAAGTGGTATACAATATGTATATGCATTCTCGAACTCCTTCTAACAACCTATGCATTTTTGTTATCATTTT-----  
-----CGATTGGACGATCCATTAATCCAGCTGGCGGAAGATTATAAATGGATAAAT---  
TTTTTTGATTTTTACTGGAGATTGGGAATAGATGGACTTTCTATAGGGCCCATTTTACTGACAGGATTTATCACCCTTT  
AGCGACTTTGGCGGCTTGGCCAGTTACTCGAGATTTCGCGATTATTTTCAATTTCTGATGCTAGCAATGTACAGTGGTCAA  
TAGGATCATTTTTCTTCTCGAGACCTTTTACTTTTTTTTCATCATGTGGGAGTTTCAATTAATTCCCGTT---  
TATCTACTTCTATCCATGTGGGGGGAAAGAAACGTCTGTACTCGGCTACAAAATTTATTTTGTACACCCGAGGGGGTTC  
CGTTTTTCTATTAATAGGAGTTTTGGGTCTCGGTTTATACGTTTCTAATGAACCAACATTAATTTTGAACATTAGCTA  
ATCAATCATATCCTGTGCGACTGGAAATAATATTCTATATTGGATTTCTTATTGCTTTTGTGTCAAATCGCCGATTATA  
CCCTTACATACGTGGTTACCGGATACCCACGGGGAGGCCATTACAGTACTTGTATGCTTCTAGCCGGAATTTTTATTA

AATGGGAGCATATGGATTAGTTCGGATCAATATGGAATTATTACCCCATGCGCATTCCATATTTTCTCCCTGGTTGATAA  
TAGTGGGTACAATGCAAATAATTTATGCAGCTTCAACATCTCTTGGTCAACGGAATTTAAAAAAAAGAATAGCCTATTCC  
TCCGTATCTCATATGGGTTTCATAATTATAGGAATTGGTTCGATAACTGATACGGGACTCAACGGAGCTATTTTACAAAT  
AATATCTCATGGCTTTATCGGT-----  
GCTGCACTTTTTTTCTTGGCAGGAACGAGTTATGATAGAATGCGTCTTGTATTCTCGACGAAATGGGCGGAATGGCC--  
-----

GTTTCGATTCCCAAAATATTTACGATGTTGAGTATCTTATCCATGGCTTCTCTTGCATTACCGGGCATGAGTGGTTTTGT  
TGCAGAATTGATAGTCTTTTTTGGGAATAATTACCAGCCAAAAATATTTTTTAATGCCAAAAATACTAATTACTTTTCGTAA  
TGGCAATTGGAATGATATTAACCTCTATTTATTTCATTATCTATGTCACGT-----  
CAAATGTTCTATGGATAACAAG-----CTATTTAATGCTCCAAGT---TCTTAT-----  
TTTTTTGATTCTGGACCACGAGAGTTATTTGTTTCGATCTCTATCTTTCTACCAGTAATAGGTATTGGTATTTTATCCGGA  
TTTTCGTTCTCTCATTATCAGGTGAGAAAGTCGAAACTATTCTATATAATTATTTTTTATAGATAG-----  
ATGATGCTC-----

GAACATATACTTGTTTTGGAGTGCCTATTTATTTTCTATCGGTATTTATGGATTGATCAGCAGTTCGAAATATGGTTAGGGC  
CCTTATGTGTCTTGAACCTATACTGAATGCGGTTAATATAAAATTTTGTAAACATTTTCTGATTTTTTGTATAGTTCGGCAAT  
TAAAGGGAAATATTTTCTCAATTTTTGTTATAGCTATTGCAGCCGCTGAAGCAGCTATTGGATCAGCTATTGTGTCCTCG  
ATTTATCGTAACAGAAAATCAACGCGTATCAATCAATCAACTTTGTTGAATAAGTAAATGGAGCATGCAGATCAATATTC  
ATGGATCATACTTTTGTCCACTTCCCATTTCTATTTAATAGGAATGGGACTCCTACTTTTTCCGACGGCAACAAAA  
ATCTTCGTCGTATGTGGGCTTTTCCCAATATTTTATTGTTAAGTATAGTTATGATTTTTTTCGCTCGATCTGTCTATTTCAG  
CAAATAAATGGAAGTTCTATCTATCAATATGTATGGTCTTGGACCATCAATAATGATTTTTTCTTTTCGAGTTTGGCTACTT  
TATTGATTCACTTACCTCTATTATGTCAATATTAATCACTACTGTTGGAATTTTTGTTCTTATTTATAGTGACAATTATA  
TGTCTCATGATGAAGGATATTTGAGATTTTTTGGTTATATGAGTTTGTTCATAACTTCAATGTTGGGATTAGTTACTAGT  
TGTAATTTGATACAAATTTATATTTTTTGGGAATTAGTTGGAATGTGTTCTTATCTATTAATAGGTTTTTGGTTTCACACG  
ACCCGCTGCGGCAACGCTTGTCAAAAAGCGTTTGTAACTAATCGGATAGGCGATTTTTGGTTTTATTATTAGGAATCTTAG  
GTTTTTATTGGATAACGGGAAGTTTCAAGATTTGTTTCGAAATATTTAATAACTTGATTTAT-----AAT---  
AATGAG-----

GTTTCATTTTTTTGTTACTTTTATGTGCCTCTTTATTTTGGCCGGCGCAGTTGCTAAATCTGCGCAATTTTCTCTTCA  
TGTATGGTTACCTGATGCCATGGAGGGGCTACTCCTATTTTCGGCTCTTATAACATGCTGCCACTATGGTAGCTGCGGGAA  
TTTTTCTTGTAGCCCGCTGCTTCTCTTTTTTATAGTTTATACCTTACATAATGAATCTAATATCTTTGATAGGTATAATA  
ACGGTATTATTAGGGGCTACTTTAGCCCTTGTCAAACGATATTAAGAGGGGTTTAGCCTATTCTACAATGTCCCAACT  
GGGTTATATGATGTTAGCTCTAGGTATGGGGTCTTATCGAGCCGCTTTATTTTCAATTTGATTACTCATGCTTATTTCGAAAG  
CGTTGTTGTTTTTAGCATCCGGATCGATTATTCATTCCATGGAAGCTATTGTTGGATATTCTCCAGAGAAAAGCCAGAAT  
ATGGTTTTTATGGGCGGTTTAAAGAAAGCACGTGCCCGTTACCCAAATTGCTTTTTTATAGTAGGTACTTTCTCTTTGCGG  
TATTCCACCCCTTGTCTGTTTTTGGTCCAAAGATGAAATTCTTAGTGACAGTTGGTTGTATTACCGATTTTTTGAATAA  
TAGCTTGGTCCACTGCCGATTAAACAGCATTTTATATGTTTCGGATCTATTTACTTACTTTTGAAGGACATTTAAACGTT  
CATTTTCAAAAATATAGTGGCAAAAAAAGTAGCTCTTTCTATTCAATAAAACTATGGGGTAAAGAAGAGCAAAAAATAAT  
TAAC-----AGAAAT-----TTTTGTTTTATTTTCTTTATTAACATTAACA---ATGAATAACAAC-----GAGCAG-  
-----CCA---TAT---ACA-----ATTGGTGA-----

AAAAAA-----GAAGCT-----CGT-----ATTACTATTACG-----AATTTTGGC---TAC-----  
AAGAAG-----GCT---

TTTTCTTATCCTCATGAATCAGATAATACTATGCTATTTCTATGCTTATATTGCTTCTATTTACTTTATTTGTTGGAGC  
TATAGCAATT---CCTTTT-----  
AATCAAGAAGGAATGCATTTGGATATATTATCAAAATTATTAACCTCCATCTATA-----  
AATCTTTTACATCAAAATTCAAATGAT-----TTTGAGGATTCG-----  
TATCAATTTTTTAAAAATGCAACTTTTTTCAGTGAGTATAGC

Helianthus

CTCATTGCTATTACTCAAACAAGCATGAAACGTATGCTTGCATATTCGTCCATAGGGCAAAATCGGATATGTAATTATTGG  
AATAATTGTTGGAGACTCAAATGATGGATATGCAAGCATGATAACTTATATGCTGTTCTATATCTCCATGAATCTAGGAA  
CTTTTGTGCTTGCATTGTCTTATTTGGTCTACGTACCGGAACTGAGAACATTTCGAGATTATGCAGGATTATACACGAAAGAT  
CCTTTTTTGGCTCTCTCTTTAGCCCTATGTCTCTTATCGCTAGGAGGTCTTCTCCACTAGCAGGTTTTTTCGAAAAC  
CTATTTATTCTGGTGTGGATGGCAGGCAGGCCTATATTTATTGGTTTTAATAGGACTCCTTACAAGCGTTGTTTCTATCT  
ACTATTATCTA-----AAAATAATCAAGTTATTAATGACT-----  
GGACGAAACCAAGAAATAACCCCTCACGTGCGAAATTATAGAAGA-----TCCCCT-----TTA-----  
AGATCAAACAATTCATCGAATTGAGTATGATTGTATGTGTGATAGCATCTACTATAACCAGGAATATCAATGAATCCGAT  
TATTGCAATTGCTCAGGATACCCTTTTTTAG-----  
ATGTTTCTGCTTTACGAATATGATATTTTTTGGGCATTTCTGATAATATCA-----  
AGTCTTATTCCTATTTTGGTATTTTTTCAATTCGGGATTTTTTAGCCCCGAGTAGCAAAGGACCGGAGAACTTTCTAGTTA



TGAATCAGGTATAGAACCAATAGGTGACGCTTGGTTACAATTTAGAATCCGCTATTATATGTTTGCTCTTGTTTTGTTG  
TTTTTGATGTGGAAACGGTTTTTCTTTATCCATGGGCAATGAGTTTCGATGTATTAGGTGTATCTGTATTTGTAGAAGCT  
TTAATTTTTGTGCTTATCTTAATTGTTGGTTAGTTTATGCATGGCGAAAGGGAGCATTGGAATGGTCTTAG-----  
-----ACGAACAAATTT-----  
CCTTGGTTAACAATAATTGTAGTTTTACCAATATTTGCAGGGTCCTTAATTTTTCTTTCTTCCC-----  
CATAAAGGAAATAGG-----  
GTAATTCGGTGGTATACTATATGTATATGCATGTTAGAACTTCTTCTAACAACCTATGCATTCTGTTATCATTTC-----  
-----CAATTGGACGATCCATTAATCCAACCTAGTAGAGGACTATAAATGGATCAAT---  
TTTTTTGATTTCCGTTGGAAATTAGGAATAGATGGACTGTCTCTAGGACCCGTTTTATTAACAGGATTTATCACTACTTT  
AGCTACTTTAGCGGCCTGGCCCGTTACTCGGGATTCTCGATTATTCATTCTTGATGTTAGCAATGTACAGTGGTCAAA  
TAGGATCATTTTCTTCTCGGGACCTTTTACTATTTTTTCATCATGTGGGAATTAGAATTAATCCAGTT---  
TATCTACTTCTATCCATGTGGGGAGGAAAGAAACGTCTCTACTCAGCCACAAAATTTATTTTGTACACGGCGGGGGGTT  
CATTTTTCTCTTAATGGGAGTTCTGGGTGTCGGTTTATATGGTTTGAATGAACCAACATTAAATTTTTGAAACATCAGTTA  
ATCAGTCGTATCCTGTGGCTTTGGAAATCATATTCTATATTGGATTTTTAATTGCTTTTGCTGTCAAATGGCCGATTCTA  
CCCCTACATACATGGTTACCAGATACCCACGGAGAGGCACATTACAGTACTTGTATGCTTCTAGCCGGAATTTTATTA  
AATGGGAGCGTATGGATTGATTTCGGATTAATATGGAATTATTACCACACGCTCATTCTATATTTTCTCCTTGGTTGATGG  
TAGTAGGCACAATACAAATAATCTATGCAGCTTCAACATCTCTCGGCCAACGTAATTTAAAAAAGAATAGCCTATTCC  
TCCGTATCTCATATGGGTTTCATACTTATAGGAATTGCTTCGATAACCGATACGGGACTCAATGGAGCTATTTTACA  
AATCTCTCATGGCTTTATTGGT-----  
GCTGCACTTTTTTTCTTGGCGGGAACGAGCTATGATAGAATACGTCTTGTTTATCTCGATGAAATGGGTGGAGTAGCT--  
-----  
ATCCCCATGCCAAAATCTTTACAATGTTGAGTAGTTTTTCCATGGCTTCCCTTGCATTACCGGGTATGAGTGGTTTTGT  
TGCAGAAGTGCTAGTATTTTTAGGAATAATTACCAGCCAAAATATCTTTTAATGCCAAAATGGCCATCACTTTTGTA  
TGGCAATTGGAATGATATTAACCTCTATTTATTTATTATCTATGTCACGC-----  
CAGATATTCTATGGATACAAG-----TTATTTAATACTCCAAAC---TCTTAT-----  
GTTTTTGATTCTGGACCGCGCGAGTTATTTGTTTCCATCTCCATTTTTTATACCCGTAATAGGTATTGGTATGTACCCCGA  
TTTTGTTCTTTCACTATCAGTTGACAAGGTTGAAGGTATTCTATCTAATTATTTTTATAGATAG-----  
ATGATGCTC-----  
GAGCATGTACTTGTGTTGAGTGCCTATTTATTTTTCTGTGCGTCTATATGGATTGATTACAAGTCGAAATATGGTTAGGGC  
TCTTATGTGCTTGAACCTATATTAATGCAGTTAATCTCAATTTTGTAACTTTTCTGATTTTTTGTAGTTCGTCAT  
TAAAAGGAGCCATTTTTCTATTTTTGTTATAGCTATTGCAGCTGCTGAAGCCGCTATTGGACTCGCTATTGTTTCATCA  
ATTTATCGTAACAGAAAATCAACTCGTATAAATCAATCGAATTTATTGAATAAGTAAATGGAACAGACATATCAATATGC  
GTGGATAATACCTTTTCTTCCACTTCCAGTTCCCTATGTTAATAGGGTTGGGACTTCTTCTTTTTCCGACGGCAACAAAA  
GTCTTCGTCGTATGTGGGCTTTTTCAGAGCGTTTTATTGTTAAGTATAGTCATGATTTTTTCTCTGAATCTGTCTATT  
CAAATAAATAGCAGTTCTGTCTATCAATATGTATGGTCTTGGATTATAAATAATGATTTTTTCTTTAGAATTCGGATACT  
GATCGATCCACTTACTTCTATTATGTCAATATTAATCACTACTGTTGGAATTATGGTTCTGATTTATAGTGATAATTATA  
TGTCTCATGATCACGGATATTTGAGATTTTTGCTTATATGAGTTTTTTCAGTACTTCCATGTTGGGATTAGTTACTAGT  
TCAAATTTGATACAAATTTATATTTTTTGGGAATTGGTTGGAATGTGTTGCTATCTATTAATAGGATTTTGGTTCCACAG  
ACCTGTTGCAGCAAAGGCTTGTCAAAAAGCATTGTAACTAATCGTGTGGTATTGTTTATTATTAGGCATTTTAG  
GGTTTTATTGGATAACGGGGAGTTTTCGAATTTCTGATTTATTTCAAATATTCAATAACTTGATTTCT-----AAT---  
AATGAG-----  
GTCAATTCTGTATTTGTTACTTTGTGCGCTGTTCTATTTTGGTGGTGGGATTGCTAAATCTGCACAATTTCCCCTTCA  
TGTATGGTTACCTGATGCAATGGAAGGGCCGACCCCTATTTTCGGCCCTTATACATGCTGCTACGATGGTAGCAGCGGGAA  
TTTTTCTTGTAGCTCGACTTATGCCCCTTTTCATAGTAATACCCACATAATGAATTTTATCTCTTTTATAGGGATAATA  
ACAGTTTTTTTCGGAGCTACTTTAGCTCTTGCTCAAAAAGACATTAAGAGAGGTTTAGCCTATTCCACAATGTCTCAATT  
GGGTTATATGATGTTAGCTCTAGGTATGGGTTCTTATCGTAGTGCTTTATTTTCAATTTGATTACTCATGCTTATTCCAAGG  
CATTATTGTTTTTAGGATCGGGATCCGTTATTCACTCAATGGAACTCTTGTGGATATTGTCAAAAAAAAGTCAGAAT  
ATGGTGCTTATGGGAGGTTAAAAAACAATGTACCAATTACTAAAAATCTTTTTTATTAGGTACACTTTCTCTTTGTGG  
TATTCCACCTCTTGCTTGTTTTTGGTCCAAAGATGAAATCTGAATGATAGTTGGTTGTATTACCTATTTTTGCAATAA  
TAGCTTGGTCTACGGCGGGATTACCCGCATTTTATATGTGTCGGATCTATTTACTTACTTTTGAAGGACATTTAAACGTT  
CATTTTCAAATTTACAGTGGAAAAAGGAATACCCCCCTGTATTTAATATCTCTATGGGGTAAAGAAGGTTCAAATAAAG  
TAAC-----AAAACTTGAACCTTTTGTGTTGGTAACTTTATTAATA-----ATGAATAAGAAT-----  
GGACGTCCTTCTTTT-----TTTTCAAATAAA---GTA---TAT---AAA-----ATGGATGAAAATGGA--  
-AGAAAT-----CTGATC-----CAACCCTTTCTTTCTATTCCG-----AATTTTAGC---AAT-----  
ACCAAG-----ACT---  
TCTTTGTATCCTTATGAATCGGATAATACGATGTTATTCCCAATACTTATATTAATTCTATTTACTTTGTTGTTGGATT  
CTTAGGAATT---CCTTTT-----AATCAAGT-----



Jasminum

ATCATTGCTATTACTCAAACAAGCATGAAACGTATGCTTGCATATTCGTCCATAGGTCAAATCGGATATGTAATTATTGG  
AATAATTGTTGGAGACTCAAATGATGGATATGCAAGCATGATAACTTATATGCTGTTCTATATCTCCATGAATCTAGGAA  
CTTTTGGCTTGCATTGTATTATTTGGTCTACGTACCGGAACTGATAACATTTCGAGATTATGCAGGATTATACACGAAAGAT  
CCCTTTTTGGCTCTCTCTTTAGCCCTATGTCTCTTATCCCTAGGGGGTCTTCCCTCCACTAGCAGGTTTTTTTCGGAAA  
CTATTTATTCCGGTGTGGATGGCAGGCAGGCCTATATTCCTTGGTTTTAATAGGACTCCTTACAAGCGTTGTTTCTATCT  
ACTATTATCTA-----AAAATAATAAAGTTATTAATGACT-----  
GGACGAAACCAAGAAATCACCCCTCACGTGCGAAATTATAGAAGA-----TCCCCT-----TTA-----  
AGATCAAACAATTCCATCGAATTGAGTATGATTGTATGTGTGATAGCATCTACTATAACCAGGAATATCAATGAACCCGAT  
TATTGCAATTGCTCAGGATACCCTTTTTTAG-----  
ATGTTTTTGGCTTTACGAATATGATATTTTTTGGGCATTTCTAATAATCTCA-----  
AGCCTTATTCCTATTTTGGCATTTCATTTCCGGGATTTTAGCCCCGATTAGGAAAGGGCCAGAGAACTTTTCGAGTTA  
TGAATCGGGTATAGAACCAATGGGCGACGCTTGGTTCCAATTTCGAATCCGTTATTATATGTTTGGCTCTAGTTTTTGTG  
TTTTTGATGTTGAAACGGTTTTTCTTTATCCATGGGCAATGAGTTTCGATGATTGGGTCTATCTGTATTTCTAGAAGCT  
TTCGTTTTTGTGCTTATCTTAATTGTTGGTTAGTTTATGCGTGGCGAAAGGGGGCATTGGAATGGTCTTAG-----  
-----ACGAATCATTTT-----  
CCTTGGTTAACAATAATTGTTGTTTTGCCAATATTTGCGGGTTCCTTAATTTTTCTTTCTTCCA-----  
CATAGAGGAAATAGG-----  
GTCATTTTTTGGTATACTATATGTATATCTATTTTAGAACTTCTTCTAACGACTTATGCATTCTGTTATCATTTC-----  
-----CAATCGGACGATCCATTAATCCAACCTGGTGGAGGATTATAAATGGATCGAT---  
TTTTTTGATTTCCATTGGAGATTAGGAATAGATGGCCTTTCTATAGGACCAATCTTACTGACGGGATTTCATCACTACTTT  
AGCTACTTTAGCGGCCCGGCCAGTTACTCGCGATGCTCGACTATTTTCATTTCTGATGTTAGTAATGTACAGTGGTCAA  
TAGGATTATTTTCTTGTGCGGGACCTTTTACTTTTTTTTTCTCATGTGGGAGTTTCGAATTAATTCCCGTT---  
TATCTACTTCTATCCATGTGGGGAGGAAAAAACGCTCTGTACTIONTAAATTTATTTTGTACACGGCGGGGGGTTCT  
TGTTTTTCTTTAATGGGAGCTCTAGGTATCGGTTTATATGGTTCTAATGAACCAACATTCAATTTAGAAATATTAGCCA  
ATCAGTCCATCCTGTGGCCTTGGAAAGAATATTTTATATTGGATTTTTTATTGCTTTTGGTGTCAAATTGCCGATTATA  
CCCCTACATACATGGTTACCAGATACCCATGGAGAAGCACACTATAGTACTTGTATGCTTCTAGCCGGAATCTTATTAAA  
AATGGGAGCGTATGGATTAGTTCCGATCAATATGGAATTATTATCTCATGCTCATTCTCTATTTTCTCCTTGGTTGATGA  
TAGTAGGTGCAATGCAAATAATCTATGCAGCTTCAACATCTCTCGGTCAACGGAATTTAAAAAAAAGAATAGCCTATTCC  
TCTGTATCTCATATGGGTTTTTTAATTATAGGAATTGGTTCCATCACCGATATAGGGCTCGATGGAGCCCTTTTACAAT  
AATATCTCATGGATTTATTGGT-----  
GCTGCACTTTTTTCTTGGCAGGAACGACTTATGATAGAATACGTCTTGTATTCTTGACGAAATGGGTGGAATAGCT--  
-----  
ATCCCAATGCCAAAAATATTCACAATGTTTCAGTATCTTTTCGATGGCCTCCCTTGCATTACCAGGTATGAGTGGTTTTGT  
TACTGAATTCATAGTATTTTTTGGACTAATTACTAGTCCAAAATACCTTTTAATGGCAAAAATACTAATTCCTTTTGTAA  
TGGCAATTGGAATCATATTAACCTCTATTTATTCAATTATCTATGTCACGC-----  
CAGATGTTCTATGGATAACAAG-----ATATTTAATGCTCCAAAC---TCTTAT-----  
TTTTTGGATTCTGGACCACGAGAGTTATTTCTTTTCGATCTCCATTTTTTTACCCATACTCGGTATTGGTCTCTACCCCGA  
TTTTCTTTCCCTATCAGTTGACAAGGTGCAAGTTATTTTATCTAATTTCTTTTGACAGATAG-----  
ATGATGCTC-----  
GAACATATACTTGTGTTTGGAGTGCCTATTTATTTTCCATCGGTATCTATGGATTGATCACAAGTCGAAATATGGTTAGAGC  
CCTTATGTGCTTGAACCTTATATTCAATTCAGTTAATATCAATTTTGTAAACATTTTCTGGTTTTTTTTGATAATCGTCAAT  
TAAGAGGAGATATTTTCTCCGTTTTTGTGTTTTCGCTATTGCAGCCGCTGAAGCAGCTATTGGACTAGCTATTGTTTCATCA  
ATTTATCGTAACAGAAAATCCACTCGTATTAACCAATCGAATTTGTTGAATAAATAGATGGAACAGACATATCAATATGC  
GTGGATTATACCTTTTCAATCCACTTCCAGTTCCTATCTTAATAGGAGTGGGACTTCTCCTTTTTCCGACGACAACAAAA  
ATCTTCGTCGTATCTGGGCCTTTCCGAGTATTTTATTGTTAAGTATAGTCATGATTTTTTCAATTAATCTGTCTATTCAA  
CAAATAAAGAGGAGTCCATCTATCAATATGTATGGTCTTGGACCATCAATAATGATTTTTTCTTTTGAATTCGGCTACTT  
GATCGATCCACTTACTTCTATTATGTCAATGTTAATCACTACTGTTGGAATTTATGGTTCTTGTGTTTATAGTGATAATTATA  
TGGCTCATGATCAAGGATACTTGGAGATTTTTTGTCTCTATGAGTTTTTTCAGTACTTCCATGTTGGGTTTAGTTACTAGT

TCCAATTTGATACAAATTTATATTTTTTGGGAATTGGTTGGAATGTGCTCCTATCTATTAATAGGGTTTTGGTTCACACG  
ACCTCTTGCGGCAAATGCTTGTCAAAGGCGTTTTGTAACATAATCGTGTAGGGGATTTTTGTTTTATTATTAGGAATTTT  
GTTTTATTGGATAACAGGTAGTTTTGAATTTAGAGATTTTTTTGAAATATTAATAAACTTGATTTAT-----AAT---  
AATGAA-----  
GTCAATTCCTCGTTTTCTTACTTTGTGTGCTTCTCTCTTATTACCCGGTGCAGTTGCCAAATCTGCACAATTTCCCCTTCA  
TGTATGGTTACCTGATGCTATGGAGGGACCTACTCCTATTTTCGGCTCTTATACATGCTGCTACTATGGTAGCAGCGGGAA  
TTTTTCTTGTAGCTCGCCTTCTTCTCTTTTTATAGTTATACCTTACATAATGAATTTTCATCTCGTTGATCGGAATAATA  
ACCATATTATTAGGAGCTACTTTAGCTCTTGTCTCAAAAAGACATTAAGAGAGGTTTAGCCTATTCGACAATGTCTCAATT  
GGGTATATGATGTTAGCTTTAGGAATGGGGTCTTATCGAAGCGCTTTATTTTCAATTTGATTACTCATGCTTATTCGAAAG  
CATTATTATTTTTAGGGTCCGGATCTATTATTCATTCAATGGAACCTCTTGTGGCTATTCTCCAGATAAAAAGTCAGAAT  
ATGGTCTTATGGTGGTTTTAAGAAAACATATACCAAGTAGCCAAATCTTTTTTTATTAGGTACACTTTCTCTTTTGTGG  
TATTCCACTCTTGTCTGTTTTTGGTCAAAGATGAAATTTCTAATGATAGTGGGTTCTATTCGCCGATTTTCGCAATAA  
TAGTTTTGACCAGCAGCAGGATTAACCCATTTTCGCCATTTTTGTGGCAATTTACTTACTTTTTGAGGGGCATTTAAATGTT  
CATTTCAAAATTACAGTGGAAACAAAATACCCCTTTCTATTCAATATCTCTATGGGGAAAAGAGGGTTCGAAAAGAAT  
TAAC-----AAAAAT-----TATCGT-----TTATTCAA-----ATGAAGAATAGT-----  
CAAAGTTCTTCTTTT-----TTTTCAAAAAG---ACA---TAT---CGA-----AGTTATGAAAATCTA--  
-AAAAAC-----GGGCTA-----CGACCTTTTCTTAATATTGTT-----CATTTTGAG---AAT-----  
AAAAAG-----TCT---  
TATTCCTATCCTTATGAATCCGACAATACTATGTTATTTCTTTACTTGTATTGGGCAGCTTTACTTTGTTTTATTGGATC  
TCTAGGAATT---CCTTT-----AATCAAGAA-----  
TTGGATGTATTAACCAAATGGTTAACTCCATCAATA-----AACCTTTTACACCAAAGTTGAATAAT-----  
TCGATCGATTGG-----TATAAATTTTTGAAGATTCCATTTTTTTCAGTGAGTATAGC

Lactuca

CTCATTGCTATTACTCAAACAAGCATGAAACGTATGCTTGCATATTCGTCCATAGGTCAAATCGGATATGTAATTATTGG  
AATAATTGTTGGAGACTCAAATGATGGATATGCAAGCATGATAACTTATATGTTGTTCTATATCTCCATGAATCTAGGAA  
CTTTTGTCTGCATTGTCTTATTTGGTCTACGTACCGGAACTGAGAACATTTCGAGATTATGCAGGATTATACACGAAAGAT  
CCTTTTTTGGCTCTCTCTTTAGCCCTATGTCTCTTATCCCTAGGAGGTCTTCTCCACTAGCAGGTTTTTTTCGGAAAAC  
CTATTATTCTGGTGTGGATGCGAGGCAGCCCTATATTTCTTGGTTTTAATAGGACTCCTTACAAGCGTTGTTTTCTATCT  
ACTATTATCTA-----AAAATAATCAAGTTATTAATAGT-----  
GGACGAAACCAAGAAATAACCCCTCACGTGCGAAATTTATAGAAGA-----TCCCCT-----TTA-----  
AGATCAAACAATTCCATCGAATTGAGTATGATTGTATGTGTGATAGCATCTACTATACCAGGAATATCAATGAATCCGAT  
TATTGCAATTGCTCAGGATACCCTTTTTTAG-----  
ATGTTTCTGCTTTATGAATATGATATTTTTTGGGCATTTCTAATCATATCA-----  
AGTCTTATTCCTATTTTTGGTATTTTTTCAATTTTCGGGATTTTTTAGCTCCGATTAGCAAAGGACCGGAGAACTTTCTAGTTA  
TGAATCGGGTATAGAACCAATAGGCGACGCTTGGTTACAATTTAGAATCCGCTATTATATGTTTGTCTCTAGTTTTTTGTTG  
TTTTTGATGTTGAAACGGTTTTTTCTTTATCCATGGGCAATGAGTTTTGATGTATTAGGTGTATCTGTATTTGTAGAAGCT  
TTAATTTTCGTGCTTATCTTAATTGTTGGTTTTAGTTTTATGCATGGCGAAAGGGGCATTGGAATGGTCTTAG-----  
-----  
-----ATGTTAGAACTTCTTCTAACAACCTATGCATTCTGTTATCATTTTT-----  
CAATTGGACGATCCATTAATCCAACCTAGTAGAGGATTATAAATGGATCAAT---  
TTTTTTGATTTCCGTTGGAAATTAGGAATAGATGGACTGTCTATAGGACCCGTTTTTATTAACAGGATTTATCACTACTTT  
AGCTACTTTAGCAGCCTGGCCTGTTACTCGGGATTCTCGATTATTCCATTTCTTGATGTTAGCAATGTACAGTGGTCAA  
TAGGATCATTCTTCTCGGGACCTTTTACTTTTTTTCATCATGTGGGAATTAGAATTAATTCGGTT---  
TATCTACTTCTATCCATGTGGGGAGGAAAGAAACGTCTCTACTCAGCCACAAAATTTATTTTATACACGGCGGGAGGTTTC  
ATCAATCGTATCCCTGTGGCTTTGGAAATAATATTTCTATATTGGATTTTTTTATTGCTTTTGTCTGTCAAATACCATTCTA  
CCCCTACATACATGGTTACCAGATACCCACGGAGAGGCACATTACAGTACTTGTATGCTTCTAGCCGGAATTTTTATTAAA  
AATGGGAGCGTATGGATTGATTTCGGATTAATATGGAATTATTACCACACGCTCATTCTATATTTTTCTCCTTGGTTGATGA  
TAGTAGGTACAATACAAATAATCTATGCAGCTTCAACATCTCCCGCCAACGCAATTTAAAAAAAAGAATAGCCTATTCC  
TCCGTATCTCATATGGGTTTCATACTTATAGGAATTGCTTCTATAACCGATACGGGACTCAATGGAGCTATTTTACAAAT  
AATCTCTCATGGGTTTATTGGT-----  
GCTGCACTTTTTTTCTTGGCAGGAACGAGTTATGATAGAATACGTCTTGTATTATCTCGACCAAATGGGCGGAGTAGCT--  
-----  
ATCCCCATGCCAAAATATTTACGATGTTTCAAGTATTTTTCCATGGCTTCGCTTGCATTACCGGGTATGAGTGGTTTTGT  
TGCAGAAGTTATAGTCTTTTTTAGGAATAATTACCAGCCAAAATATCTTTTTAATGCCTAAAATTGCCATCACTTTTGTAA  
TGGCAATTGGAATGATATTAACCTCTATTTATTCAATATCTATGTTACGC-----

CAGATGTTCTATGGATATAAG-----TTATTTAATACTCCAAAC---GCTTAT-----  
GTTTTTGATTCTGGACCGCGCGAGTTATTTGTTTCGATCTCCATTTTTCTACCTGTAATAGGTATTGGTATGTATCCGGA  
TTTTGTTCTTTCACTATCAGTTGACAAGGTTGAAGGTATTCTATCTAATTATTTTTATAGATAG-----  
ATGATGCTC-----  
GAACATGTACTTGTGTTGAGTGCCTATTTATTTCTGTCCGGTCTATATGGATTGATTACAAGTCGAAATATGGTTAGGGC  
TCTTATGTGTCTTGAACCTATATTTAAATGCGGTTAATCTCAATTTTGTAAACATTTTTCGGATTTTTTGTATAGTCTGTAAT  
TAAAAGGAGCCATTTTCTCCATTTTGTATAGCTATTGCAGCTGCTGAAGCTGCTATTGGACTCGCTATTGTTTCATCA  
ATTTATCGTAACAGAAAATCAACTCGTATAAATCAATCGAATTTGTTGAATAAGTAAATGGAACAGACATATCAATATGC  
GTGGATAATACCTTTCCCTTCCACTTCCAGTTCCTATGTTAATAGGGTTGGGACTTCTTCTTTTTCCGACGGCAACAAAA  
GTCTTCGTGCTATGTGGTCTTTTCAGAGTGTGTTTATTGTTAAGTATAGTCAATGATTTTTTCCATGAATCTGTCTATTAG  
CAAATAAATAGCAGTTATGTCTATCAATATGTATGGTCTTGGATTATCAATAATGATTTTTTCTTTAGAAATTCGGATACTT  
GATCGACCCGCTTACTTCTATTATGTTAATAATTAATCACTACTGTTGGAATTTATGGTCTTATTTTATAGTATAATTATA  
TGTCTCATGACCACGGATATTTGAGATTTTTGCTTATATGAGTTTTTTCAGTACTTCCATGTTGGGATTAGTTACTAGT  
TCAAATTTGATACAAATTTATATTTTTTGGGAATTAGTTGGAATATGTTTCGTATCTATTAATAGGATTTTGGTTCACACG  
ACCTGTTGCAGCAAAGGCTTGTCAAAGGCGTTTGTAACTAATCGTGTGGCGATTTTGGTTTATTATTAGGCATTTTAG  
GGTTTTATTGGATAACGGGGAGTTTCGAATTTTCGTGATTTATTCCAAATCTTCAATAACTTGATTTCT-----AAT---  
AATGAG-----  
GTCAATTTTTTATTTGTTACTTTGTGTGCTATTCTATTATTTGCCGGTGCAGATTGCGAAATCTGCACAATTTCCCCTTCA  
TGTATGGTTACCTGATGCAATGGAAGGGCCAACCTCCTATTTTCGGCCCTTATACATGCTGCTACAATGGTAGCAGCGGGAA  
TTTTCTTTGTAGCTCGACTTATGCCTCTTTTCATAGTTATACCCACATAATGAATTTTATCTCTTTGATAGGGATAATA  
ACAGTTTTTTTAGGAGCTACTTTAGCTCTTGTCTAAAAAGACATTAAGAGGGGTTAGCTTATTCCACAATGTCTCAACT  
GGGTTATATGATGTTAGCTCTAGGTATGGGGTCTTATCGCAGTGTCTTATTTTCAATTTGATTACTCATGCTTATTCCAAAG  
CATTATTGTTTTTAGGATCGGGATCTGTTATTCATTCAATGGAACTCTTGTGGATATTGTCCAAAAAAGTCAAGAT  
ATGGTGTCTTATGGGAGGTTTAAACAAAACATCTACCAATTACTAAAAATCTTTTTTATTAGGTACTTTCTCTTTGCGG  
TATTCCACCCCTTGTCTGTTTTTGGTCCAAAGATGAAATCTTAATGATAGTTGGTGTATTACCTATTTTTGGAATAA  
TAGCTTGGTCTACGGCGGGATTAACCGCATTTTATATGTGTGCGATCTATTTACTTACTTTTGAAGGACATTTAAACGTT  
CATTTTCAAATTTATAGTGGAAAAAGGAATACCCCTTCTATTCAATATCTCTATGGGGTAAAGAAGGTTTCGAAAATAAG  
TAAC-----AAAAAC-----TTTAGTTTGGTAACTTTATTAATA-----ATGAAGAAGAAT-----  
CCACGTCCTTCTTTT-----TTTTCAAATAATAAAGTA---TAT---AAA-----ATTGATGAGAATGTA--  
-AGAAAT-----ATGATA-----CAACCCTTTCTTTCTATTCCG-----CATTTTGGC---AAT-----  
ACCAAG-----ACG---  
TATTCGTATCCTTATGAATCGGATAATACTATGTTATTCCCAATACTTATATTGATTCTATTTACTTTGTTTCGTTGGATT  
CTTAGGAATT---CCTTTC-----AATCAAGAC-----  
GTTGATATATTATCCAAATGGTTAAACCCGTCTATA-----AATCTTTTACATCAAAATTCAAATAAT-----  
TCGATAGATTGG-----TATGAATTTAGTAAAGATGCATTTTTTTTCAGTCAGTATAGC  
Liriodendron  
CTCATTGCTATTACTCAAACAAGCATGAAACGTATGCTTGCATATTCGTCCATAGGTCAAATCGGATATGTAATTATTGG  
AATAATTGTTGGAGACTCAAATGATGGATATGCAAGCATGATAACTTATATGCTGTTCTATATCTCCATGAATCTAGGAA  
CTTTTGTCTGCATTGTCTCATTGGTCTACGTACCGGAACCTGATAACATTTCGAGATTATGCAGGATTATACACGAAAGAT  
CCTTTTTTGGCTCTCTTTCAGCCCTATGTCTTATCCCTAGGAGGTCTTCTCCACTAGCAGGTTTTTTCGGAAAACCT  
CCATCTATTCTGGTGTGGATGGCAGGCAGGCCTATATTTCTTGGTTTTCAATAGGACTCCTTACGAGCGTTGTTTCTATCT  
ACTATTATCTA-----AAAATAATCAAGTTATTAATGACT-----  
GGACGAAACCAAGAAATAACCCCTCACGTGCGAAATTATAGAAGA-----TCTCCT-----TTA-----  
AGATCAAACAATTCATCGAATTGAGTATGATTGTATGTGTGATAGCATCTACTATAACCAGGAATATCAATGAACCCAAT  
TATTGCAATTGCTCAGGATACCCTCTTTTAG-----  
ATGTTTCTGCTTACGAATATGATATCTTCTGGGCATTTCTAATAATATCA-----  
AGTGTATTCCATTTTTGGCATTCTAATTTCCGGAGTTTTAGCCCCGATTAGTGAAGGACCAGAGAAGCTCTCTAGTTA  
TGAATCGGGTATAGAACCCATGGGGGATGCTTGGTTACAATTCGAATCCGTTATTATATGTTTGTCTAGTTTTTGTG  
TTTTGATGTTGAAACGGTCTTTCTTTTATCCATGGGCAATGAGTTTCGATGATTGGGTGTATCTGTATTTATAGAAGCT  
TTAATTTTCGTGCTTATCCCAATTGTTGGTTCAGTTTATGCATGGCGAAAAGGAGCATTGGAATGGTCTTAG-----  
-----ACGAGTTATTTT-----  
CCTTGGTTAACAATAATTGTGGTTTTGCCGATATTTGCCGGTTCGTCAATTTTTCTTTTTCCCT-----  
CATAGAGGAAATAAG-----  
GTGGTTCCGGTGGTATACTATTTGTATCTGCTTATTAGAACTCCTTCTAACGACCTATGCATTCTGTTATCATTTC-----  
-----CAATTGGACGATCCATTAATTCAATTGGAGGAGGATTATAAATGGATAAAT---  
ATTTTTGATTTTCACTGGAGACTGGGAATCGATGGACTTTCCATAGGACCCATTTTACTGACGGGATTTCATCACTACTTT  
AGCTACTTTAGCGGCTCGGCCAGTTACTCGGGATTTCGCGATTGTTCCATTTCTAATGTTAGCAATGTACAGTGGTCAA

TAGGATCATTCTTCTCGAGACCTTTTACTTTTTTTCATCATGTGGGAGTTAGAATTAATTCCTGTT---  
TACTTACTTCTATCCATGTGGGGGGTAAGAAACGTCTGTACTCAGCTACAAAGTTTATTTTGTACACTGCGGGGGTTC  
CATCTTTCTCTTAATGGGAGTTCCAGGTATGGGTTTATATGGTTCCAATGAACCAATATTAATTTTGAACATCAGCTA  
ATCAATCGTATCCCCTGGCATTGGAAATAATATTCTATTTTGGTTTCCTTATTGCTTATGCTGTCAAATCGCCGATTATA  
CCCCTACATACATGGTTACCAGATACCCATGGAGAAGCACATTACAGTACATGTATGCTTCTAGCTGGAATCTTATTA  
AATGGGAGCATATGGATTGGTTCCGGATCAATATGGAATTATTACCCCATGCCATTCTATATTTTCTCCCTGGTTGATGA  
TAGTAGGAACGATTCAAATAATCTATGCAGCTTCAACTTCTCCGGTCAAAGCAATTTAAAAAGAGAATAGCCTATTCC  
TCCGTATCTCATATGGGTTTACAATTATAGGAATTGGTTCCATAACCGATACGGGACTCAATGGAGCAATTTTACA  
AATCTCTCATGGATTTATTGGT-----  
GCTGCACTTTTTTCTTGGCAGGAACGAGTTACGATAGAATACGTCTTGTATTCTTGACGAAATGGGAGGAATAGCT--  
-----

ATCCCAATGCCAAAAATATTTACCATGTTTCAGTAGCTTCTCGATGGCTTCTCTTGCAATTGCCAGGAATGAGTGGTTTTGT  
TGCAGAATCGGTAGTTTTTGGGGAATAATTACCAGCCCAGAAATATCTTTTAAATGCCAAAAATACTAATTACTTTTGTAA  
TGGCAATTGGAATGATATTAACCTCTATTTATTCATTATCTATGTCACGC-----  
CAGATGTTCTATGGATACAAA-----CTGTTTAAATGTTCCAAAC---TCTTAT-----  
TTTTTGGATTCTGGACCACGAGAATTTGTTTCGATCTGTATCTTTCTACCCGTAATAGGTATCGGTATTTATCTCTGA  
TTTTGTTCTCTCGCTATCAGTTGACAAGGTAGAAGCTATTCTAGCTAATTACTTTTACAATAG-----  
ATGATGACC-----

GAGCATGTACTTATTTTGGAGTGCCTATTTATTTTCTATCGGTATTTATGGATTGATCACAAGCCGAAACATGGTTAGAGC  
ACTTATGTGTCTTGAGCTTATACTGAATGCGGTTAATCTAAATCTCGTAACATTTTCTGATTTATTTGATAGTCGCCAAT  
TAAAGGAGACATTTTCTCGATCTTTGTTATAGCTATTGCAGCCGCTGAAGCAGCTATTGGGCCAGCTATTGTTTCGTCG  
ATCTATCGTAACAGAAAATCAACTCGTATCAATCAATCGAATTTGTTGAATAAATAGATGGAACATACATATCAATATGC  
ATGGATCATACTTTTCGTTCCACTTCCAGTTACTATGTCAATAGGATTGGGACTTCTGCTTGTTCGACTGCAACAAAA  
ATCTTCGTCGTATGTGGGCTTTTCCCTAGTGTTCATTGCTAAGTATAGTTATGGTTTTTTCGGCCGATCTGTCTATT  
CAAATCAATGGCAGTTCTATCTATCAATATCTATGTTCTTGGACCATCAATAATGATTTTTTCTTTAGAGTTCGGCCACT  
GATCGACCCACTTACTTCTATTATGTCAATACTAATCACTACTGTTGGAATCATGGTTCTTATTTATAGTGACAATTATA  
TGTCTCATGATCAAGGATATTTGAGATTTTTGCTTATATGAGTTTTTCCAATACTTCTATGTTGGGATTAGTTACTAGT  
TCCAATTTGATACAAATTCATATTTTTTGGGAACGGTGGGAATGTGTTTCGTATCTATTAATAGGTTTTTGGTTTACACG  
ACCAATTTGCAGCCAATGCTTGTCAAAAAGCGTTTGTAACTAATCGTGTAGGGGATTTTGGTTTTATTATTAGGAATCTTAG  
GTTTTTATTGGATAACAGGCAGTTTGGAAATTTGGGATTTGTTTCAAATCTTCAATAACTTGATCCAT-----ACT---  
AATGGG-----

GTAAATCTTTATTTGCTACTCTGTGTGCCTTCCCTATTATTTGTCGGTGCAGTTGCTAAATCCGCGCAATTTCCCCTTCA  
TGTATGGTTACCTGATGCCATGGAGGGGCCACTCCTATTTTCGGCTCTTATACATGCTGCTACTATGGTGGCAGCGGGAA  
TTTTTCTTGTGCTCGGCTTCTTCCCATTTTTCACAGTCATACCTTACATAATGAATCTCATTCTTTGCTAGGTATAATA  
ACGGTACTATTAGGAGCTACTTTAGCTCTTGTCTCAAAAAGACATTAAGAGAAGTTTAGCCTATTCTACAATGTCTCAATT  
GGGTTATACTATGTTAGCCCCAGGGATAGGTTCTTATCGAGCTGCTTTATTCCATTTAATCACTCATGCCTATTCGAAAG  
CATTATTGTTTTTAGGATCCGGATCGATTATTCATTCAATGGAACCCATTGTTGGATATTCTCCAGATAAAAAGTCAGAAC  
ATGGTTCTTATGGGTGGTTAACCATAATGTGCCAATTACAAAACGACTTTTTTATTAGGTACACTTTCTCTTTGTGG  
TATTCCACCTCTTGTCTGTTTTTGGTCCAAAGATGAAATTTCTAATGATAGTTGGTTGTATTACCGATTTTCGCGATAA  
TAGCTTGTTCACAGCAGGATTAAGTGCATTTTATATGTTTCGGATGATTTACTTACTTTTGGGGGCATTTACACATT  
CGGTTTCAAATACAGTGGCACTAAAAATAGCTCGTTCTGTTCAATATCTATATGGGGGAAAGAAGGACCCGGAACCGGT  
TAAA-----AAAAA-----TACTT-----TTATCAGTA-----ATGAATAAAT-----  
CAAAGGTTTCTTT-----TTTTCGAAGAAG---ATA---TAT---CAA-----ATTGATGGGAATGTA--  
-CGAAAT-----CTGATG-----CGATCCTTTAGTACT-----CATTTTGAC---AAT-----  
AAAGAC-----ACT---

TCCATGTATCCCTGTGAATCGGACAATACCATGCTATTTCTCTACTTGTATTGGTACTATTTACTTTGTTTGGTGC  
CATAGGAATT---CCTTTC-----  
GATCAAGTAGGATCGGATTTTGTATATATTATCGAAATGGTTAACCCTCAATA-----  
AACCTTTTACATCAAAATTCGAACTAT-----TCTGTGGATTGG-----  
TATGAGTTTGTGACAAATGCAATTTATTTCAGTCAGTATATC

Lotus

CTCATTGCTATTACCCAAACAAGCATGAAACGTATGCTTGCCTATTTCGTCCATAGGTCAAATCGGATATGTAATTATTGG  
AATAATTGTTGGAGACTCAAATGGTGGATATGCAAGCATGATAACTTATATGCTGTTCTATATCTCCATGAATCTAGGAA  
CTTTTGTCTGCATTGTATCATTGGTCTACGTACCGGAACTGATAACATTTCGAGATTATGCAGGATTATACACGAAAGAT  
CCTTTTTTGGCTCTCTCTTTAGCACTATGTCTCTTATCCTTAGGAGGTCTTCTCCGCTAGCAGGTTTTTTCGGAAA  
TTATTTATTCTGGTGTGGATGGCAGGCAGGCCTATATTTCTTGGTTTTCAATAGGACTTCTTATGAGCGTTGTTTCTATCT  
ACTATTATCTA-----AAAATAATCAAGTTATTAATGACT-----

GGACGAAACCAAGAAATAACCCCTCACGTGCGAAATTATAAAAGG-----TCCCCT-----TTA-----  
AGATCAAACAATTCCATCGAATTGAGTATGATTGTATGTGTGATAGCATCTACTATATCAGGAATATCAATGAACCCGAT  
TATTGAAATTGCTCAGGATACCCTTTTTTAG-----  
ATGTTTTTGCTTTATGAATATGATATTTTTTGGGCATTTCTAATAATATCG-----  
ATCTTTATTCCGATTTTGGCATTTTACAATTTCTGGCTTTTTGGCCCCGATTAACAAAGGGCCAGAGAACTTTCTAGTTA  
TGAATCGGGAATAGAACCAATGGGAGATGCTTGGTTACAATTTCAAATCCGTTATTATATGTTTGGCTCTAGTTTTTGTG  
TTTTTGATGTTGAAACGGTTTTTCTTTATCCATGGGCAATGAGTTTTGATGATTGGGGATATCCGTATTTATAGAAGCT  
TTGATCTTTGTGCTTATCCTAATTGTTGGTTACGTTTACGCGTGGCGAAAGGGGGCTTTAGAATGGTCTTAA-----  
-----ACGAATTATTTT-----  
CCTTGGTTAACATTAGTTGTAATTTTGCCAATAGCCGGCGGTTCCTTAATTTTCTTATTTCT-----  
CATAGAGGAAATAAG-----  
GTAATTAGGTGGTATACTGTTTGTATTTGTTTGTATAGATCTCCTTTTAAACAACCTATGCGTTTTGTTATCATTTC-----  
-----CAATTGGATGATCCGCTAATTCAACTGACGGAGAGTTATAAATGGATCAAT---  
TTTTTTGATTTTTACTGGAGATTCGGAATAGATGGACTCTCTATAGGACCCATTTTACTGACGGGATTTATCACCCTTT  
AGCTACTTTAGCGGCTCAGCCGATTACTCGAGAATGCAAATTATTCTATTTCTGATGTTAGCAATGTATAGCGGTCAA  
TAGGACCATTTTCTTCTCGAGACATTTTACTTTTCTTCATCATGTGGGAATTGGAATTAATTCCCGTT---  
TATCTACTTTTAGCCATGTGGGGGGAAAGAAACGTTTGTATTACGCTACAAAATTTATTTTGTATACTGCGGGAAGTTC  
TGTTTTTTTTATTAATGGCAACTCTAGGTATCGGTTTATACGTTTCTAATGAACCAACACTCAATTTTGAACATTAATA  
ATCAATCATATCCCTTGGCGTTGGAAATAATCGTATATATAGGATTTCTTATTGCGTTTGTGTCAAATCACCGATTATA  
CCCTTACATACATGGTTACCGGATACACACGGAGAGGCCATTACAGCACTTGTATGCTTTTAGCCGGAATCTTATTA  
AATGGGAGCATATGGGTTGGTTTGAATTAATATGGAATTTTTCCACGCTCATTCTATATTTTGCCTTGGTTAATGA  
TATTAGGTTCCATTCAAATAATCTATGCCGCTTACGATCTCTTGGTCAACGTAATTTAAAAAAGAATAGCTTATTCC  
TCAGTATCTCATATGGGTTTCTAATTATAGGAATTGGTTCTATAAGCGATACGGGGCTCAACGGGGCCATTTTACAAAT  
AATATCTCATGGATTTATTGGC-----  
GCTGCGCTTTTTTTCTTGTGAGGAACTAGTTATGATAGACTACGTCTTCTTTATCTTGACGAAATGGGTGGAATGGCT--  
-----  
CTGCCAATGCCAAAAATATTCACGGTTTTTACTATCTTATCGATGGCCTCTCTTGCATTGCCGGGCATGAGTGGTTTTTT  
TGCAGAGTTGATAGTTTTTTGGGGAATAATTACCAGCCAAAAATATTTTTTAATAATGAAAATACTAATTACTTTTTGTAA  
CAGCAATTGGAATGATATTAACTCCTATTTATTATTCTATCTTACGG-----  
CAGATGTTCTATGGATACAAG-----TTTTTTAATACGCCAAAC---TCATAT-----  
TTTTTTGATTCTGGACCGAGAGAATTATTTATTTTCGATTTCTATCCTTATACCAATAATAGGTATTGGTATTTATCCAGA  
TTTCATTTTCTCATTCTCGGTTGACAAGGTTGAAGCTGTTCTATCTCATTTTTTGA-----  
ATGATGCTC-----  
GAACATGTACTTGTTTTGTAGTGCTTATCTATTTTCTATCGGTATCTATGGATTAATCACGAGTCGAAATATGGTTCGAGC  
CCTTATGTGTCTTGAACCTTATATTGAATGCAGTAAATATGAATCTCGTAACCTTTTCTGATTTTTTTGATAATCGCCAAT  
TAAAGGGAAATATTTTTTCAATTTTTGTTATAGCTATTGCAGCCGCTGAAGCAGCTATCGGACCGGCGATTGTTTCTCA  
ATTTTCGCGTAACAGAAAATCAATTCGTATCAATCAATCGAATTTGTTGAATAAATAGATGGAATATACACATCAATCTTC  
ATGGATCATAACCCTTACCCCACTTCCCGTTCTATATTAATAGGAGTAGGACTTCTACTTTTTTCTACGGCAACAAAA  
ATCTTCGCCGATGTGGGCTTTTTCTAGTATTTTTTGTAAATTATAGTTATGATTTTTTCTGTAGATCTATCTATTTCAT  
CAAATCAAGAACAGTTCTATCTATCAATATGATGGTCTTGGACTATAAATACCGATCTTTCTTTAGAGTTTGGTTACTT  
GATCGATTCACTTACCTCTATTATGTCAATATTAATTACTACTGTTGGCATTCTGGTTCTTATTTATAGTGATAATTATA  
TGTCTCATGATCAAGGGTATTTGAGATTTTTTGGCTATTTGAGTTTTTTAATACTTCAATGTTAGGATTAGTTACTAGT  
TCGAATTTGATACAAGTTTACATTTTTTGGGAATTGGTTGGAATGTGTTCTTATCTATTAATAGGTTTTTGGTTTACACG  
TCCTATTGCCGCAATGCTTGTCAAAAAGCGTTTGTAACTAATCGTGTAGGCGATTTTGGTTTTATTATTAGGAATTTGG  
GTCTTTATTGGATTACAGGTAGTTTGGAAATTTCCGGATTTATTCCAATAATCAACAACCTTGATTGAT-----CAA---  
AATGAG-----  
GTTAATATTTTTTTTATTACTTTGTGTGCCCTCTTGTATTTTTGTGGCTCGGTTGCAAAATCTGCCCAATTCCCCCTTCA  
TGTATGGTTACCAGATGCTATGGAAGGTCCCACCCCTATTTCTGCTCTTATACATGCTGCCACCATGGTAGCAGCAGGAA  
TTTTCTTGTAGCTCGACTTCTTCCCTTTTTCATAGCCATACCTTCTATAATGAACGGAATAGCTTTTATAGGTATAATA  
ACAGTAGTATTAGGGGCCACTTTAGCAATTGCTCAAAAAGATATTAAGAAAAATTTGGCCTATTCTACCATGTCTCAATT  
GGGTTATATGATGTTAGCTTTAGGTATGGGCTCTTATCGAATTGCGTTATTTTCAATTTGATTACTCATGCTTATTCAAAG  
CATTGTTGTTTTTGGGTCCGGATCCATTATTCAATGGAAGCTATTGTTGGGTATTCTCCAATAAAAAGTCAAAAT  
ATGCTTCTTATGGGTGGTTTAAACAAAACATGTGCCAATTACAAAACACTGCCTTTTTAATAGGTACGCTTTTCTTTTGTGG  
TATTCCGCTTTTCGCTGTTTTTGGTCCAAGGATGAGATTCTTAATGATAGTTGGTTATACTCACCAATTTTTGCAATAA  
TAGCTTGTTC AACAGCAGGATTAACCGCATTTTATATGTTTCGGATCTATTTACTTGTTTTTGAAGGATATTTCAATGTT  
CATTTTCAAAATTTCAATGGAAGAAAAATAGTTTATTCTATTCAATATCTTTATGGGGTAAAGAAGGAAAAAATAAT  
AAAA-----AATAAA-----ATTCATTTATTATCTTTATTAACA-----ATGAATAATAAT-----

GAAAGGACTTCATTG-----TTTCGCAAAAGG---GCA---TAT---TTATCTAAAATTAATCGAAATGTG--  
-AAAAGC-----ATAACA-----CGTCTTTTCATTCATAGTACC-----TATTTTGGT---ACT-----  
AAAAAG-----  
TTTCCTTGTTTTTATCCTCATGAATCTGACAATACTATGTTATTTTCTATGCTTGTCTTAGTACTATTTACTTTCTTCGT  
CGGAGCCATAGGAATT---TCCTTT-----  
AACCAAGAAGGAATAGATTTGGATATATTATCCAAATTGTTAAGTCCGTCAATA-----  
GACCTTTTACACCAAAATTCAAACAAG-----TCTGTAGATTGG-----  
TATGAATTTTTTACAAATGCAACTTTTTTCGGTGAGTATAGC  
Morus  
CTCATTGCTATTACTCAAACAAGCATGAAACGTATGCTTGCCTATTCGTCCATAGGTCAAATTGGATATGTAATTATTGG  
AATAATTGTTGGAGACTCCAATGGTGGATATGCAAGCATGATAACTTATATGCTGTTCTATATCTCCATGAATCTAGGAA  
CTTTTGCTTGCATTGTATCATTGGTCTACGTACCGGAAGTATAACATTTCGAGATTATGCAGGATTATACACGAAAGAT  
GCTTTTTTGGCTCTCTTTAGCCCTATGTCTTATCCTTAGGAGGTCTTCTCCACTAGCAGGTTTTTTCGGAAAAGT  
TCATTTATTCTGGTGTGGATGGCAGGCAGGCCTATATTTCTTGGTTTTCAATAGGACTCCTTACGAGCGTTGTTTCTATCT  
ACTATTATCTA-----AAAATAATCAAGTTATTAATGACT-----  
GGACGAAACCAAGAAATAACCCCTCACGTGCAAAATTATAGAAGA-----TCCCCT-----TTA-----  
AGATCAAACAATTCCATCGAATTGAGTATGATTGTATGTGTGATAGCATCTACTATAACCAGGAATATCAATGAACCCGAT  
TATTGAAATTGCTCAGGATACCCTTTTTTAG-----  
ATGTTTCTGCTTTATGAATATGATATTTTCTGGGCATTTTTAATAATATCA-----  
AGTGTATTCCCTATTTTTGCATTTATAATTTCCGGAGTTTTAGCCCCGATTAGCAAAGGACCAGAAAACTTTCTAGTTA  
TGAATCGGGAATAGAACCAATGGGGGATGCTTGGTTACAATTTCGAATCTGTTATTATATGTTTGGCTTTAGTTTTTGTG  
TTTTTGATGTTGAAACAGTTTTTCTTTATCCATGGGCAATGAGTTTCGATATATTGGGGGTATCCGTATTTATAGAAGCT  
TTAATTTTCGTAATTATCCTAATTGTTGGTTCAATTTATGCATGGCGAAAAGGAGCATTGGAATGGTCTTAG-----  
-----ACGAATTATTTT-----  
CCTTGGTTAACGATAATTATAGTTTTGCCAATATTTGCGGGTTTCTAATTTTTATTTCTTCT-----  
CATAGAGGAAATAAG-----  
GTAATTAGGTGGTACTCTTTGTATATGTATAATCGAACTCCTTCTAACAACTATGCATTTGGCTATCATTTC-----  
-----CAATTTGGACGATCCATTAACTCAACTGGCAGAGGATTATAAATGGATCGAT---  
TTTTTGGATTTTTCTGGAGATTGGGAATAGATGGAATTTTCGATAGGACCTATTTTGGCTGACGGGGTTTTACTACTTTT  
AGCTACTTTAGCGGCTCGGCCAGTTACTCGGGAATCCCGAGTATTCATTTCTGATGTTAGCAATGTATAGCGGTCAA  
TAGGACCATTTTCTTCTCAAACCTTTTACTTTTTTTTTATCATGTGGGAATTAGAATTAATTCCAGTT---  
TATCTACTTCTATCCATGTGGGGAGGAAAGAAACGTTTGTATTAGCTACAAAATTTATTTTGTACACTGCAGGAAGTTC  
CGCCTTTTTATTAGTGGGAATTCTAGGTATTTGTTTATCTGCTTCTAATGAACCAACATTAAATTTTGAACATCAGCTA  
ATCAATCGTATCCTGTAGCACTCGAAATGCTATTCTATATTGGATTTTTTATTGCTTTTGGCTGTCAAATCGCCGATTATA  
CCCTTACATACCTGGTTACCAGACACTCATGGAGAGGCACATTACAGTACTTGTATGCTTCTAGCTGGAATCTTATTAAA  
AATGGGAGCGTATGGATTGGTTTCAATCAATATGGAATTTTACCTCACGCACATTCTATATTTTCTCCTTGGTTGATGA  
TAGTCGGCACAATTCAAATAATCTATGCAGCTTCAACATCTCCTGGTCAACGTAATTTAAAAAAAAGAATAGCTTATTCC  
TCCGTATCTCATATGGGTTTATAAATTATAGGACTTGGTTCTATAAACGATACAGGACTCAATGGAGCCATTTTACAAT  
AATCTCTCATGGATTTATTGGC-----  
GCGGCGCTTTTTTCTTGGCAGGAACGAGTTATGATAGAATACGCCTTGTATCTCGATGAAATGGGCGGAATGGCT--  
-----  
ATCACAATTCCAAAAATATTTACGACTTTTCAGTATCTTATCAATGGCTTCTCTTGCATTACCGGGCATGAGCGGTTTTGT  
TGCAGAATTAATATTTTGGGAATACTTACTAGCCAAAAATATCTTTTAAATGACAAAAATACTAATTACTTTTGTAA  
TGGCAATTGGAATGATATTAATCCTATTTTATTATTATCTATGTTACGC-----  
CAGATGTTCTATGGATAACAAG-----CTTTTTACTGTACAAAAC---TCTTAT-----  
TTTGTGATTTCTGGTCCGCGAGAATTTTTGTTTTCGATCTCTATTCTTTTACCCGTAATAGCTATTGGTATTTATCCAGA  
TTTTGTTTTCTCACTATCAGTTGACAAAGTCAAGCTCTTCTATCTAATTTATTTTATCCATAG-----  
ATGATGCTC-----  
GAACATGTACTTGTGTTTTGAGTGCCTACTTATTTTCTATCGGTATCTATGGATTGATCACCAGCCGAAATATGGTTAGAGC  
TCTTATGTGCTTGAACCTATACTAAATGCGGTTAATATAAATTTGTAACATTTTCTGATTTTTTGTATAGTCGCCAAT  
TAAAAGGAAATATTTTTTCCATTTTTGTTATAGCCATTGCAGCCGCTGAAGCCGCCATTGGACCAGCTATTGTTTCGTCA  
ATTTATCGTAATAGAAAATCAACTCGTATCAATCAATCGAATTTGTTGAATAAGTAGATGGAATATATATATCAATATTT  
CTGGATTATAACTTTCTACTTCTCCTGTTCTATATTAATAGGAGTAGGACTTCTACTTTTTCCAACGGCAACAAAA  
GTCTTCGCCGATGTGGGTTTTTCCAAGTGTATTATTGTTAAGTATAATTATGCTTTTTTCAACCTATCTAGCTATTCAA  
CAAGTAAATAACCCCTTCTATATATCTATCTATATGGTCTTGGACTATAAATAATGACTTTTTCTTTAGAATTTGGCTATTT  
AGTTGACCCACTTACTTCTATTATGTTAATATTAATTACTACTGTTGGAATTTTGGTTCTTATTTATAGTGACAATTATA  
TGCTCATGATCAGGGATATTTGAGATTTTTTGCCTATATGAGTTTTTCAATACTTCAATGGTAGGATTGGTTACTAGT



TCTAATCTCATACAAATTTATTTTTTTTTGGGAATTGGTTGGAATGTGTTCTTATCTATTAATAGGTTTTGGTTTTACACG  
ACCTACTGCAGCGAATGCTTGTCAAAAAGCGTTTGTCTACTAATCGCGTCGGAGATTTTGGTTTTATTATTAGGAATTTT  
GTTTTTATTGGATAACGGGCAGTTTTAGAATTTCCGGATTTGTTTGAATATTCAATAACTTGGTTTTAT-----AAT---  
AATGAA-----  
GTTAATCTTTTTATTTGCTACTTTGTGTGCCTTTCTATTATTTGCTGGTGCAATTGCTAAATCTGCCCAATTTCCCCTTCA  
TGTATGGTTACCCGATGCTATGGAAGGGCCTACCCCTATTTTCAGCTCTTATACATGCTGCTACTATGGTAGCAGCTGGAA  
TTTTTCTTGGAGCTCGGCTTCTTCCGCTTTTCATAGTTATGCCTTATATAATGAATCTAATAGCTTTATTAGGTATAATA  
ACATTACTTTTAGGAGCCACTTTAGCCTTTGCTCAAAAGGATATTAAGAGAGGTTTAGCTTATTCTACAATGTCTCAATT  
GGGTTATATGATGTTGGCTCTAGGTATGGGTTCTTATCGGGCTGCTTTGTTTCATTTGATTACTCATGCTTATTCCAAAG  
CATTGTTGTTTTTAGGATCTGGATCTATTATTCATTCAATGGAAAGTATTGTTGGATATTCTCCAGATAAAAAGCCAGAAT  
CTGGTTCTTATGGGAGGTTTTAAAAAACATGTACCAATTACAAAACATCTTTTTTATTAGGTACACTTTCTCTTTTGGT  
TATCCACCTCTTGGCTGTTTTTGGTCCAAAGATGAAATTTCTAATGATAGTTGGTTGTATTCCCAATTTTTGCAATAA  
TAGCTTTTTCCACAGCGGGATTAACATGCATTTTATATGTTTTCGGATCTATTTACTTACTTTTTGAGGGACATTTAAATCTT  
TATTTTCAAACCTTACAGTGGTAAAAAAGAAGTTCTGTCTATTCAATATCTTTATGGGGTAGAGAAGAGCAAAAGTGGAT  
TAAA-----ACAAA-----TTTCGCTTATTACCTTTATTAACA-----ATGAATAATAAT-----  
AAAAAGACTTCTTTT-----TTTTTAAAAAG---AAA---TAT---CTA-----ATTAATAGAAATGTA--  
-AGAAAT-----TTGAGG-----GGGCCTATTATTACTATTCCTAATCCTAATTTTGGT---ACT-----  
AAGAAC-----AGT---  
TTCTCGTATCCTCATGAGTCGGAAAATACTATGCTATTTTCTATGCTTGTATTAGGTCTATTTACTTTGTTTCATTGGAAT  
TATAGGAATT---CCTTTCTTC-----  
AATCAAGAAGGAATTCAGTTGGATATATTAACAAAATTATTAACTCCGTCTATA-----  
AACCTTTTATATCAAAATAAAAAAAT-----  
TTGATGGATTGGGATTGGTATGAGTTTATAACAAATGCAACTTATTCAGTCAGTATAGC

Nandina

CTCATTGCTATTACTCAAACAAGCATGAAACGTATGCTTGCATATTCGTCCATAGGTCAAATCGGATATGTAATTATTGG  
AATAATTGTTGGAGACTCAAATGATGGATATGCAAGCATGATAACTTATATGCTGTTCTATATCTCCATGAATCTAGGAA  
CTTTTGTCTGCATTGTATTATTTGGTCTACGTACCGGAACATGATAACATTCGAGATTATGCAGGATTATACACGAAAGAT  
CCTTTTTTGGCTCTCTCTTTAGCCCTATGTCTCTTATCCCTAGGAGGTTCTTCCCTCCACTAGCAGGTTTTTTTCGGAAAAC  
CCATCTATTCTGGTGTGGATGGCAGGCAGCCCTATATTTCTTGGTTTTCAATAGGACTCCTTACGAGCGTTGTTTTCTATCT  
ACTATTATCTA-----AAAATAATCAAGTTATTAATGACT-----  
GGACGAAACCAAGAAATAACCCCTCACGTGCGAAATTATAGAAGA-----TCTCCT-----TTA-----  
AGATCAAACAATTCCATCGAATTGAGTATGATTGTATGTGTGATAGCATCTACTATAACCAGGAATATCAATGAACCCCAT  
TATTGCAATTGCTCAGGATACCCTTTTTTTTTAG-----  
ATGTTTCTGCTTACGAATATGATATTTTCTGGGCATTTCTAATAATATCA-----  
AGTGTATCCCTATTTTGGCATTCTAATTTCCGGCGTTTTGGCCCTATTAGTGAAGGACCGGAGAACTTTCTAGTTA  
CGAATCGGGTATAGAACCAATGGGCGATGCTTGGTTACAATCCGAATCCGTTATTATATGTTTGTCTAGTTTTTGTG  
TTTTTGATGTTGAAACGGTTTTTCTTTATCCATGGGCGATGAGTTTCGATGTATTGGGTGTATCTGTATTTATAGAAGCT  
TTAATTTTTCGTGCTTATCCTAATTGTTGGTTAGTTTATGCATGGCGAAAGGGGCATTGGAATGGTCTTAG-----  
-----ACGAATTCCTTT-----  
CCTTGGTTAACAATAATTGTAGTTTTGCCGATATTCGCGGGTCTTCAATTTTCTTTTTCCCT-----  
CATAGGGGAAATAAG-----  
GTAATACGGTGGTATACTATTTGTATTTGTTTATTGGAACCTCTTCTAACCACCTATGCATTCTGTTATCATTTT-----  
-----CAGTTGGACGATCCATTAGTCCAATTGGAACAGGATTATAAATGGATAAAT---  
ATTTTTGATTTTCACTGGAGACTCGGAATCGATGGACTTTCCATAGGACCCGTTTTACTAACGGGATTCTACTACTTT  
AGCCACTTTAGCGGCTTGGCCAGTTACTCGGGATTCGCGATTGTTCCATTTCTGATGTTAGCAATGTACAGCGGTCAA  
TAGGATCATTTTCTTCTCGGGATCTTTTACTTTTTTTTCATCATGTGGGAGTTAGAATTAATTCCTGTC---  
TACCTACTTCTATCCATGTGGGGAGGAAAGAAACGTTTGTACTCAGCTACAAAGTTTATTTTGTACACTGCGGGAGGTT  
GATTTTTCTCTTAATAGGAGTTTCTGGTATGGGTTTATATGTTTCCAATGAACCAACATTAATTTTGAACATCAGCTA  
ATCAATCGTATCCTGTAGCATTGGAAATACTATTATATTTTGGATTTTTTATTGCTTATGCTGTCAAACCTGCCGATCATA  
CCCCTACATACATGGTTACCGGATACCCACGGAGAAGCACATTATAGTACATGTATGCTTTTAGCCGGAATCTTATTA  
AATGGGAGCATATGGATTGGTTCCGATCAATATGGAATTATTACCCACGCTCATTCTATATTTTCTCCTTGGTTGATGA  
TAGTAGGCACAATTCAAATAATCTATGCAGCTTCAACATCTCTCGGTCAACGCAACTTAAAAAAGAGAATTGCTTATT  
TCCGTATCTCATATGGGTTTACAATTCTAGGAATTAGTTCCATAACGGATACGGGACTCAATGGGGCCATTTTACA  
GATATCTCATGGATTTATTGGT-----  
GCTGCACTTTTTTCTTGGCAGGAACGAGTTACGATAGAATACGTCTTGTATTCTCGACGAAATGGGAGGAATAGCT--  
-----  
ATCCCAATGCCAAAATTTTTTACACTGTTTCAGTAGTTTCTCAATGGCTTCTCTTGCATTGCCGGGAATGAGCGGTTTTGT

TGCGGAATTGGTAGTATTTTTTGGCATAATTACTAGCGAAAAATTTTTTTAATGCCAAAAATACTAATTACATTTGTAA  
CGGCAATTGGAATGATATTAACCTCTATTTATTATTATCTATGTTACGC-----  
CAGATTTTTTATGGATAACAAG-----CAATTTAATGTTCCAAAC---TCTCAT-----  
TTTTTTGATTCTGGACCACGAGAAGCTTTTTGTTTCGATCTGTATTTTTCTACCCGTAATAGGTATTGGTATTTATCCGGA  
TTTTCGTTTTTCACTATCAGTTGACAAAGTCGAAGCTATTTTATCTAATTACTTTTATAGATAG-----  
ATGATGCTC-----  
GAGCATGTACTTGTTTTGGAGTGCCTATTTATTATCTATCGGTATTTATGGATTGATTACAAGCCGAAATATGGTTAGAGC  
GCTTATGTGTCTTGAGCTTATACTGAATGCGGTTAATATGAATTTTCGTAACATTTTCTGATTTATTTGATAGTCGCCAAA  
TAAAAGGAGACATTTTCTCGATTTTTGTTATAGCTATTGCAGCCGCTGAAGCCGCTATTGGATTAGCTATTGTTTCATCA  
ATTTATCGTAACAGAAAAATCAACTCGTATAAACCAATCGAATTTGTTGAATAAATAGATGGAACATACATATCAATATGC  
ATGGATCATACTTTTCGTTCCACTCCCAGTTTCTTATAGCAATAGGAGTGGGGCTTCTCCTTGTTCAGCCGCAACAAAA  
GTCTTCGTCGTATGTGGGCTTTTCTTAGCGTTTTTATTACTAAGTATCATCATGATTTTTTTTCAGCCGATCTGTCTATTTCAG  
CAAATAAAAGGCAGTCTTATCCATCAATATGTATGGTCTTGGACTATCAATAATGATTTTTTCTTAGAATTTGGCTACTT  
GATCGATCCACTTACTTCCATTATGTTAATATTAATCACTACTGTTGGAATAATGGTTCTTATTTATAGTGACAATTATA  
TGTCTCATGATCAGGGCTATTTGAGATTTTTTGGTTATATGAGTTTTTCCAATGCTTCCATGTTGGGATTAGTTACCAGT  
TGCAATTTAATACAAATTTATATTTTTTGGGAATTAGTAGGAATGTGTTTCATATCTATTAATAGGGTTTTGGTTCACACG  
ACCAATTGCGGCAAGTGCTTGTCAAAAAGCCTTTGTAATAATCGTGTAGGGGATTTTGGTTTTATTATTAGGAATTTTGG  
GTTTTTATTTTATAACGGGTAGTTTTCGAATTTCCGGATTTGTTTCAAATAACCAATAACTTGATGGAT-----AAT---  
GGTGA-----  
GTCAATTCCTTTATTCCTTACTTTGTGTGCCAGCCTCTTATTCGTCGGTGCAATTGCTAAATCGGCGCAATTCCTTCA  
TGTATGGTTACCGGATGCCATGGAGGGCCTACTCCTATTTTCAGCTCTTATCCATGCTGCTACTATGGTAGCAGCAGGAA  
TTTTTCTTGTAGCTCGACTTCTTCTCTTTTTACAGTCATACCTTATGTAATGAATTTTCAATTTCTTGTATAGGTATAATA  
ACAATACTTTTAGGGGCTACTTTGGCTCTTGGCTCAAAGAGACATTAAGAGAAGTTTAGCCTATTCTACAATGTCTCAATT  
GGGTTATACTATGTTAGCTTTAGGTATGGGGTCTTATCGAGCTGCTTTATTTTCAATTTGATCACTCATGCCTATTCGAAAG  
CATTATTATTTTAGGATCCGGATCCATTATTCATTCAATGGAAACCGTTATTGGATATTCACCAGAGAAAAGTCAGAAC  
ATGGTTCTTATGGGGGTTTAAACAAAATATGTGCCAATAACAAAACCTGCCTTTTTATTAGGTACACTTTCTCTTTGTGG  
TATTCACCTCTTGTCTGTTTTTGGTCCAAAGACGAGATTTCTTAATGATAGTTGGTTGTATTCACCGATTTTCGCGATAA  
TAGCTTGTTTTACAGCGGGTTAACTGCATTTTATATGTTTTCGAATGTATTTACTAATTTTGAAGGGCATTAAATGCT  
CATTTTCAAATTCAGTGGCAAAAAAATAGCTCGTTCTTATTTCAATATCTATATGGGGTAAAGAAGGACGAAAGCGAT  
AAAA-----CAGAAT-----TCTGTT-----TTATCAACA-----ATGAATAATAAT-----  
GAAAGCGCTTACCTT-----TTTTCAAAAAA---ACG---TAT---CCA-----ATTGATGGGAATGTA--  
-AGAAAT-----ATGATG-----CGATCCCTTATTACTATTACA-----AATTTTTCG---AAT-----  
AAAAAA-----ACC---  
TCCCGTATCCCCACGAATCGGATAATACTATGCTATTGCCCTTCTTATATTGGTCTTATTTACTTTGTTTGTGGATT  
CATAGGAATT---CCTTTT-----  
GATCAGGGAGGAATAGATTTTGTATATATTATCAAAATTTGTTAACTCCGTCGATA-----  
AATCTTTTACATTCAAATTCGAACAAT-----TCCGTGGATTGG-----  
TATGAATTTGTGACAAATGCTTTTTTTTTTTCAGTAAGTATAGC  
Nicotiana  
CTCATTGCTATTACTCAAACAAGCATGAAACGTATGCTTGCATATTCGTCCATAGGCCAAATCGGATATGTAATTATTGG  
AATAATTGTTGGAGACTCAAATGATGGATATGCAAGCATGATAACTTATATGCTGTTCTATATCTCCATGAATCTAGGAA  
CTTTTGTCTGCATTGTATTATTTGGTCTACGTACCGGAACTGATAACATTTCGAGATTATGCAGGATTATACACAAAAGAT  
CCTTTTTTGGCTCTCTCTTTAGCCCTATGTCTCTTATCCCTAGGAGGTCTTCTCCACTAGCAGGTTTTTTTCGGAAAAC  
CTATTTATTCTGGTGTGGATGGCAGGCAGGCCTATATTTCTTGGTTTTAATAGGACTCCTTACAAGCGTTGTTTCTATCT  
ACTATTATCTA-----AAAATAATAAAGTTATTAATGACT-----  
GGACGAAACCAAGAAATAACCCCTCACGTGCGAAATTATAGAAGA-----TCCCCT-----TTA-----  
AGATCAAACAATTCATCGAATTGAGTATGATTGTATGTGTGATAGCATCTACTATAACCAGGAATATCAATGAACCAAT  
TATTGCAATTGCTCAGGATAGCCTTTTTTAG-----  
ATGTTTCTGCTTTACGAATATGATTTTTTTTTTGGGCATTTCTAATAATATCT-----  
ATCCTTGTTCCTATTTTGGCATTTTTTAATTTCCGGAGTGTTAGCCCCGATTAGCAAAGGGCCGGAGAACTTTCTACTTA  
TGAGTCGGGTATAGAACCAATGGGCGATGCTTGGTTACAATTTCGAATCCGTTATTATATGTTTGTCTAGTTTTTGTG  
TTTTTGATGTTGAAACGGTTTTTCTTTATCCATGGGCAATGAGTTTCGACGTATTGGGTGTATCTGTATTTATAGAAGCT  
TTCATTTTTCGTGCTTATCTTAATTATTGGTTTTAGTTTTATGCATGGCGAAAGGGGCATTGGAATGGTCTTAG-----  
-----ACGAATTATTTT-----  
CCTTGGTTAACAATAATTGTAGTTTTTCCAATATTTGCGGGTTCCTTAATTTTTCTTTCTTCCC-----  
CATAAAGGAAATAGG-----  
GTAATTAGGTGGTATACGATATGTATATGTATTTTAGAACTCCTTCTAACGACTTATGCATTTTGTATCATTTT-----

-----CAATCGGATGATCCATTAATCCAACACTAGTGGAGGATTATAAATGGATCAAT---  
TTTTTTGATTTCCATTGGAGATTAGGAATAGATGGACTTTCTATAGGACCCATTTTATTAACAGGATTTATCACTACTTT  
AGCTACTTTAGCGGCTTGGCCAGTTACTCGAGATTCTCGATTATTCCATTTTCTCATGTTAGCAATGTACAGTGGTCAA  
TTGGATCATTTTTCGTCTCGGGACCTTTTACTTTTTTTCATCATGTGGGAGTTAGAATTAATTCCTGTT---  
TATCTACTTCTATGCATGTGGGGAGGAAAGAAACGTCTGTACTCAGCTACAAAATTTATTTTGTACACGGCGGGGGTTC  
TGTTTTTCTCTAATGGGAGTTTTGGGTCTTGCTTTATATGGTTCTAATGAACCAACATTAAATTTTGAACATCAGTTA  
ATCAGTCATATCCTGTGGTTTTAGAAATAATATTCTATATTGGATTTTTTATTGCTTTTGTCTGTCAAATCGCCCATTATC  
CCCCTACACACATGGTTACCAGATACCCATGGAGAAGCACATTACAGTACTTGTATGCTTCTAGCCGGAATTTTATTA  
AATGGGAGCGTATGGATTAATTCGAATCAATATGGAATTATTACCTCATGCCCATTTCTATATTTTCTCCTTGGTTGATGA  
TAATAGGTACAATACAAATAATCTATGCAGCTTTAACATCTCTTGGCCAACGGAATTTAAAAAAAAGAATAGCCTATTCC  
TCTGTCTCTCATATGGGTTTTATAATTATAGGAATTAGTTCTCTAACCAGACACGGGACTTAATGGAGCCCTTTTACA  
AATATCTCATGGATTTATTGGT-----  
GCTGCACTTTTTTCTTGGCGGGAACGACTTATGATAGAATCCGCCTTGTTTATCTTGACGAAATGGGCGGAATAGCT--  
-----  
ATTCCAATGCCAAAATGTTTACGATGTTTCAGTAGCTTTTCGATGGCTTCCCTTGCAATTACCAGGTATGAGTGGTTTTGT  
TGCCGAATTGATAGTATTTTTTGGGAATAATTACCGGCCAAAATATCTTTTAATTCAAAATACTAATTACTTTTGTAA  
TGGCAATTGGAATGATATTAATCCTATTTTATTATTATCTATGTCACGC-----  
CAGATGTTCTATGGATAACAAG-----CTATTTAATGCCCGAAG---GATTCT-----  
TTTTTTGATTCTGGACCGCGAGAGTTATTTCTTTTCGATCTCCATCTTTTTACCCGTAATAGGTATTGGTATATACCCGGA  
TTTTCGTTCTTTTATTAGCAGTTGACAAGGTCGAAGTTATTCTATCTAATTTTTTTTTATAGATAA-----  
ATGATTCTC-----  
GAACATGTACTTGTGTTTGGAGTGCCTATTTATTTTCTATCGGGATCTATGGATTGATCACAAGTCGAAATATGGTTAGAGC  
CCTTATGTGCTTGAACCTTATATTGAATGCGGTTAATATAAATTTTGAACATTTTCTGATTTTTTGTATAATCGTCAAT  
TAAAAGGAGACATTTTCTCAATTTTTGTTATAGCTATTGCAGCCGCTGAAGCAGCCATTGGACTGGCTATTGTTTCATCA  
ATTTACCAGTAACAGAAAATCAACTCGTATCAACCAATCAAATTTGTTGAATAATTAGATGGAACAGACATATGAATATGC  
GTGGATCATACTTTTCACTTCCAGTCCCTATGTTAATAGGAGCGGGACTTTTTCTTTTTCCAACGGCAACAAAA  
GTTTTCGCCGATGTGGGCTTTTTAGAGTGTGTTTATTGTTAAGCATAGTCTGTTTTCATCTACCTGTCTATTTCAG  
CAAATAAATAGCAGTCTTTTTTATCAATATGTATGGTCTTGGATCATCAATAATGATTTTTTCTTTAGACTTCGGTACTT  
GATCGACCCACTTACTTCTATTTATGTCAATATTAATCACTACCGTTGGAATTTATGGTTCTTATTTATAGTGATAATATA  
TGGCTCATGATCAAGGCTATTTGAGATTTTTGCTTATATGAGTTTTTTCAGTACTTCCATGTTGGGATTAGTTACTAGT  
TCGAATTTGATACAAATTTATATTTTTTGGGAATTGGTTGGGCTGTGTTCTATCTATTAATAGGATTTTGGTTTACACG  
ACCTGTTGCGGCAATGCTTGTCAAAAAGCGTTTGTAACTAATCGTGTAGGGGATTTTGGTTTATTATTAGGAATTTTAG  
GTTTTTATTGGATAACAGGGAGTTTTCGAATTTAGGGATTTATTTCGAAATATTCAATAACTTGATTTAT-----AAT---  
AATGAA-----  
GTCGATTTTTTATTTGTTACTTTTATGTGCTGTTCTCTTATTTGCCGGTGCAGTTGCTAAATCCGCCCAATTTCCCCCTTCA  
TGTATGGTTACCTGATGCCATGGAGGGCCTACTCCCATTTTCGGCTCTTATACATGCTGCTACTATGGTAGCGGCGGGAA  
TTTTTCTTGTAGCTCGGCTTCTTCTCTTTTTAGAGTTATACCTTACATAATGATTTGATCTCGGTTATAGGAATAATA  
ACAGTATTATTAGGAGCTACTTTAGCTCTTGTCTAAAAAGACATTAAGAGAGGTTTAGCCTATTCCACAATGTCTCAATT  
GGGTTATATGATGTTAGCTCTTGGTATGGGGTCTTATCGAAGCGCTTTATTTTCAATTTGATTACTCATGCTTATTCCAAAG  
CATTATTATTTTATAGGATCCGGATCCATTATTTCATTCAATGGAACTATTGTTGGATATTCTCCAGCTAAAAGTCAGAAT  
ATGGGTCTTATGGGAGGTTTAAAGAAAACATGTACCAATTAGCAAAATCACATTTTTTATTAGGTACACTTTCTCTTTGTGG  
TATTCCACCTCTTGTGTTTTTGGTCCAAAGATGAAATTCTTAATGATAGTTGGTTGTATTTCGCCAATTTTTCGCAATAA  
TAGCTTGGGCCACGGCGGGATTAACCGCATTTTATATGTTTCGGATCTATTTACTTACTTTTGAAGGGCATTAAACGCT  
CATTTTCCAAATTTATGGTGGGAAACAAAAACCCCTTCTATTCAATATCTCTATGGGGTAAAAACGGAGTTAAG-----  
-----AAAAAC-----TCTTGT-----TTATTAAT-----ATGAATAATAAT-----  
GAAAGTACTTATTTT-----TTTGCAAAAAC---AAA---TAT---CCA-----ATTGATAAAAAATGGA--  
-AGAAAG-----ATGACA-----CGACCTTTTATGACTATTGCT-----CATTTTGAG---CAT-----  
AAAGCG-----GTT---  
TATTCTATCCTTATGAATCGGACAATACTATGCTATTCCCAATATTTGATTAGGACTCTTTACTTTGTTTGGTGGATC  
TATAGGAATT---CCTTTC-----  
AACCAAGAGGGAGGGAATTTGGATATATTATCGAAATGGTTAGCTCCATCTATA-----  
AATCTTTTGCATCAAAAGTCGAATAAT-----TCGATGGATTGG-----  
AATGAATTTTTAAAGGATGCAGTTCTTTTCAGTTCAGTATAGC  
Nuphar  
CTCATTGCTATTACTCAAACAAGCATGAAACGTATGCTTGCATATTCGTCCATAGGTCAAATCGGATATGTAATTATTGG  
AATAATTGTTGGAGACTCAAATGATGGATATGCAAGCATGATAACTTATATGCTGTTCTATATCTCCATGAATCTAGGAA  
CTTTTGTGCTTGCATTGATTATTTGGTCTACGTAAGTACTGAACTGATAACATTTCGGGATTATGCAGGATTATACACGAAAGAT

CCTTTTTCGGCTCTCTCTTCAGCCCTATGTCTCCTATCCCTAGGGGGTATTCTCCATTAGCAGGTTTTTTTCGGAAAAC  
CTATCTATTCTGGTGTGGATGGCAGGCAGGCCTATATTTCTTGGTTTTCAATAGGACTCCTTACGAGCGTTGTTTCTATCT  
ACTATTATCTA-----AAAATAATCAAGTTATTAATGACT-----  
GGACGAAACAAAGAAATAACCCCTCACGTGCGAAATTATAGAAGA-----TCTCCT-----TTA-----  
AGATCAAACAATTCCATCGAATTGAGTATGATTGTATGTGTAATAGCATCTACTATAACCAGGAATATCAATGAACCCAAT  
TATTGCAATTGCTCAGGATACCCTCTTTTAG-----  
ATGTTTCTGCTTCACGAATATGATATTTTCTGGGCATTTCTAATGATATCA-----  
AGTGTTATTCTATTTTGGCATTATAATTTCCGGGGTTTTAGCCCCAATTAGTGAAGGACCAGAGAAGCTCTCCAGTTA  
TGAGTCGGGTATAGAACCAATAGGGGATGCTTGGATACAATCCGAATCCGCTATTACATGTTTGCTCTCGTTTTTGTG  
TTTTTGATGTCGAAACGGTCTTTCTTTATCCATGGGCCGTGAGTTTCGATGTATTGGGCGTATCCGATTTTATAGAAGCT  
TTGATTTTCGTGCTTATCCCAGTTGTTGGTTTCAGTTTATGCATGGCGAAAAGGAGCATTGGAATGGTCTTAG-----  
-----ACGAGTGATTTT-----  
TATTGGTTAACAATCATTGTTGTTTTGCCCATATCTGCGGGTTCCTTAATTGCCCTTCTCCCT-----  
CATAGAGGAAATAAG-----  
GTAGTTCGATGGTATACTATCTGTATCTGCTTATTTGAACTCCTTCTAACGACCTACGTATTCTGCTATCATTTT-----  
-----CAATTGGATGATCCATTAATCCAATTGGAAGAAGATTTTAACTGGATAAAT---  
CTTTTTGATTTTCACTGGAGACTCGGAATCGACGGACTTTCCATAGGACCTATTTTATTGACAGGATTTTACTACTTTT  
AGCTACTTCAGCGGCTCGGCCAGTTACCCGAAATTCGCGATTGTTCCATTTCTGATGTTAGCAATGTACAGTGGTCAAA  
TAGGATTATTTTCTTCTCGAGATCTTTTACTTTTTTTCATCATGTGGGAGTTAGAGTTAATTCCTGTT---  
TACCTACTTCTATCCATGTGGGGAGGAAAGAAACGTCTGTACTCAGCTACAAAGTTCATTTTGTACACTGCAGGAGGTTT  
CATTTTTCTCTTAATGGGAGTTCTAGGTATGGGTTTATATGGTTCCAATGAACCAAATTAATTTTGAACATTAGCTA  
ATCAATCGTATCCCGTGGCATTGGAAATAATATTTTATTTTGGCTTCCTTATTGCTTATGCTGTCAAATCACCGATCATA  
CCTTTACATACATGGTTGCCAGATACCCATGGAGAGGCGCATTACAGTACATGTATGCTTCTAGCTGGAATCTTATTA  
AATGGGAGCATAACGGTTGGTTCCGGATCAATATGGAATTATTACCCACGCCCATTCCATATTTTCTCCTTGGTTGATGA  
TAGTAGGAACTATTCAAATAATCTATGCAGCTTCAACTTCTCTCGGTCAACGCAATTTAAAAAAGAGAATAGCCTATTCT  
TCCGTATCTCATATGGGTTTTCATAATAATAGGAATTAGTTCTATAACCGATGCGGGACTCAATGGAGCCATTTTACA  
AATCTCTCATGGATTTATTGGT-----  
GCTGCACTTTTTTCTGCGCAGGAACAAGTTATGATAGAATACGTCTTCGTTATCTTAACGAAATGGGAGGAATAGCT--  
-----  
ATACTAATGCCAAGAATCTTTACGATGTTCAGTAGCTTCTCGATGGCTTCTCTCGCATTACCAGGAATGAGTGGTTTTGT  
TGCGGAATTGGTGATATTTTGGGAATAAATACTAGCCCAAAATACCTTGTAGTGTCAAAAATACTAATTACTTTTGTAA  
TGGCAATTGGAATGATATTAACCTCTATTTTATTCAATTATCTATGTCACGC-----  
CAGATGTTCTATGGATACAGG-----TTATTCAATGTTCCAAAC---TCTTAC-----  
TTTGTGGATTCTGGACCACGAGAAATATTTATTTTGTATGTATCCTTTTACCTATAATAGGTATTGGTATTTATCCCGA  
TTTCGTTCTCTCACTATCAGTTGACAAGGTAGAAGCTATTCTATCTAATTACTTTTCATGGGTAG-----  
ATGATGCTC-----  
GAGCATGTACTTGTTTTTGAGTGCCTATTTATTTTCTATTGGTATCTATGGATTGATCACAAGTCGAAACATGGTTAGAGC  
ACTTATGTGTCTTGAACCTATACTGAATGCTGTTAATATGAATCTCGTAACATTTTCTGATTTATTTGATAGTCGCCAAT  
TAAAGGGAGACGTTTTCTCGATCTTCGTTATCGCTATTGCAGCCGCCGAAGCAGCTATTGGACCAGCTATTGTTTCTTCG  
ATCTATCGTAACAGAAAATCAACTCGTATAAATCAATCAAATTTATTGAATAAATAGATGGAACGCACATATCAATATGC  
ATGGATTATACCTTTTCGTTCCGCTTCTAGTTACTATGTTAATAGGATTGGGACTCCTGCTTATTCCAACAGCAACAAAA  
ATATTCGTGCTATATGGGCTTTTCCCGCTGTTTTATTGTTAAGTATAGTTATGGTCTTTTCCACCAAGCTGGCGATCCAG  
CAAATAAACGGTAGCTCAATTTATGAATATCTATGGTCTTGGAGCATCACCAGTGATTTTCTTATAGGTTTCGGCTACTT  
GATTGATCCACTTACTTCTATTATGTGATATTAATCACTACTGTTGGAATCATGGTTCTTATCTATAGTGATAATTATA  
TGTCTCATGACCAAGGATATTTGAGATTTTTTGCTTATATGAGTTTTTCAATACTTCTATGCTGGGATTAGTTACTAGT  
CCCAATTTGATACAAATCCATATTTTTTGGGAACCTGTGGGAATGTGTTCCATTTGTTAATAGGTTTTTGGTTTTACCCG  
ACCAATTCAGCAAAATGCCTGTCAAAAAGCGTTTGTGACTAATCGTGTGGGGGATTTTGGTTTTATTATTAGGAATCTTAG  
GTTTTTATTTAATAACAGGTAGTTTCGAATTTTCAGGATTTATTTCGAAATATTCAATGATTTCGATCATT-----  
AATAACAATGAG-----  
ATTAATTCCTCATTGCTACGTTGTGTGCCTTCTTATTATTCCTTGGTGCAGTTGCTAAATCCGCGCAATTCCTCGCTTCA  
TGTATGGTTACCTGATGCTATGGAGGGACCTACTCCTATTTTCGGCTCTTATACATGCGGCTACTATGGTAGCCGAGGAA  
TTTTTCTTGTAGCTCGGCTTCTTCTCTTTTTCATAGGCATACCTTACATAATGAATATCATTCTTTGATAGGGCTAATA  
ACGGTACTATTAGGAGCTACCTTGGCTCTTGCTCAAAGAGATATTAAGAGAAGTTAGCTTATTCCACGATGTCTCAATT  
GGGATACATTATGTTAGCTTTGGGTATAGGTTCTTATCGAGCCGCTTTATTCCATTTGATCACTCATGCTTATTCTAAAG  
CATTATTGTTTTTAGGATCTGGATCAATCATTCCATGGAACCCATTGTTGGGTATTCTCCAGCTAAGAGCCAGAAT  
ATGGTTCTTATGGGTGGTTTTAACCAATATATGCCAATTACAAAACAACCTTTTTTTTTTAGGTACACTTTCTCTTTGTGG  
TATTCCACCCCTCGCTTGTTTTTTGGTCCAAAGACGAAATTATTAATGATAGTTGGTTGTATTACCGATTTTTTGCACAA

TAGCTTGCTACACAGCAGGATTAAGTGCATTTTATATGTTTTCGTATGTATCTACTTACTTTTCGAAGGACATTTACGTAGT  
AATTTTAAAAATTACAGCGGACATACAAATAGTTCTTCTATTCAATATCTATATGGGGGCAAGAAGGTTCCAAACCAGT  
TAGC-----AGTAAT-----TTGCTT-----TTAGCAACA-----AGGAATAATAAT-----  
GACAAGTCCTCCTTTTCGAGTTGCCCGTTTTCTAAT-----ACA---TAT---AAA-----ATTGCCGGTTATGTA--  
-AGAAAC-----ATGCGA-----TCATCTTTTAGTACT-----CATTTTTTG---AAT-----  
AAGGACCCTTATACT---  
TTACTATATCCGCATGAATCGGACAATACCATGTTATTTCCCCTGCTTATATTGGCCATATTTACTTTGTTTCGTTGGATG  
CATAGGAATT---CGTTTC-----  
GGGCAAGAAGTAATGGAGGTTGACATATTATCGAAATGGTTAACCCCATCGATG-----  
AAACTTTTACATCAGAATCAACT-----GAAGATTGG-----  
TATAAATTTGTGACGAATGCGTTTTATTTCAGTCAGTATAGC

Nymphaea

CTCATTGCTATTACTCAAACAAGCATGAAACGTATGCTTGCATATTCGTCCATAGGTCAAATCGGATATGTAATTATTGG  
AATAATTGTTGGAGACTCAAATGATGGATATGCAAGCATGATAACTTATATGCTGTTCTATATCGCCATGAATCTAGGAA  
CTTTTGCTTGCATTGTATTATTTGGTCTACGTACTGGAACATGATAACATTCCGGGATTATGCAGGATTATACACGAAAGAT  
CCTTTTTTGGCTCTCTCTTCAGCCCTATGTCTCCTATCCCTAGGGGGTATTCTCCATTAGCAGGTTTTTTTTGGAAAAC  
CTATCTATTCTGGTGTGGATGGCAGGCAGGCCTATATTTCTGGTTTTCAATAGGACTCCTTACGAGCGTTGTTTTCTATCT  
ACTATTATCTA-----AAAATAATCAAGTTATTAATGACT-----  
GGACGAAACAAAGAAATAACCCCTCACGTGCGAAATTATAGAAGA-----TCTCCT-----TTA-----  
AGATCAAACAATTCCATCGAATTGAGTATGATTGTATGTGTAATAGCATCTACTATACCAGGAATATCAATGAACCCAAT  
TATTGCAATTGCTCAGGATACCCTCTTTTAG-----  
ATGTTTCTGCTTTACGAATATGATATTTTCTGGGCATTTCTAATGATATCA-----  
AGTGTATTCCCTATTTTGGCATTCTAATTTCCGGGGTTTTAGCCCCAATTAGTGAAGGACCAGAGAAGCTCTCCAGTTA  
TGAATCGGGTATAGAACCAATAGGGGATGCTTGGATACAATTTCGAATCCGCTATTACATGTTTGGCTCTCGTTTTTGTG  
TTTTTGATGTGCAACCGGTCTTTCTTTATCCATGGGCCGTGAGTTTTGATATATTGGGCGTATACGTATTTATAGAAGCT  
TTGATTTTCTGCTTATCCCAGTTGTTGGTTTCAGTTTATGCATGGCGAAAAGGAGCATTGGAATGGTCTTAG-----  
-----ATGAGTGATTTT-----  
TATTGGTTAACAATCATTGTTGTTTTGCCCATATCCGCGGGTTCCTTAATTGCTCTTCTCCCT-----  
CATAGAGGAAATAAG-----  
GTAGTTTCGATGGTATACTATCTGTATCTGCTTATTTGAACTCCTTCTAACGACCTACGTATTCTGTTATCATTTT-----  
-----AAATTGGACGATCCATTAATCCAATTGGAAGAAGACTTTAACTGGATAAAT---  
CTTTTTGATTTTCACTGGAGACTCGGAATCGACGGACTTTCTATAGGACCCATTTTATTGACAGGATTTATCACTACTTT  
AGCTACTTCAGCGGCTTGGCCAGTTACTCGAAATTCGCGATTGTTCCATTTCTGATGTTAGCAATGTACAGTGGTCAA  
TAGGATCATTCTTCTCGAGACCTCTTACTTTTTTTCATCATGTGGGAATTAGAATTAATTCCTGTT---  
TACCTACTTTTATCCATGTGGGGAGGAAAGAAACGTCTGTACTCAGCTACAAAGTTTCAATTTGTACACTGCAGGAGGTT  
CATTCTTCTTAAATGGGAGTTCTAGGTATGGGTTTATATGGTTCCAATGAACCAACATTAATTTTGAACATTAGCTA  
ATCAATCGTATCCCGTGGCATTGGAAATAATATTTTATTTTGGTTTCTTATTGCTTATGCTGTCAAATCACCGATCATA  
CCTTTACATACATGGTTGCCAGATACCCATGGAGAGGCGCATTACAGTACATGTATGCTTCTAGCTGGAATCTTATTA  
AATGGGAGCATAACGGTTGGTTCCGGTCAATATGGAATTATTACCCACGCCCATTCATATTTTCTCCTTGGTTGATGA  
TAGTAGGGACTATTCAAATAATCTATGCAGCTTTAACTTCTCCTGGTCAACGCAATTTAAAAAAGAGAATAGCCTATTCT  
TCCGTATCTCATATGGGTTTATAATAATAGGAATTAGTTCTATAACCGATGCGGGACTCAATGGAGCTATTTTACAAAT  
AATCTCTCATGGATTTATTGGT-----  
GCTGCACTTTTTTCTGCGAGGAACAAGTTATGATAGAATACGTCTTCGTTATCTTAACGAAATGGGGGAATAGCT--  
-----  
ATACTAATGCCAAGAATCTTTACGATGTTTCAGTAGCTTCTCGATGGCTTCTCTCGCATTACCAGGAATGAGTGGTTTTGT  
TGCAGAATTTGTGATATTTTGGGAATAATTACTAGCCCAAAATACCTTGTAAATGTCAAAAATACTAATTACTTTTGTAA  
TGGCAATTGGAATGATATTAACCTCCTATTTATTCAATTATCTATGTCACGC-----  
CAGATGTTCTATGGATACAGG-----TTATTCAATGTTCCAAAG---TCTCAC-----  
TTTTGGATTCTGGACCACGAGAAATCTTTATTTTTATGTGTATCCTTTTACCAATAATAGGTATTGGTATTTATCCAGA  
TTTTCGTTCTTCACTATCAGTTGACAAGGTAGAAACTATTCTATCTAATTACTTTTCATGGGTAG-----  
ATGATGCTC-----  
GAGCATGTACTTGTTTTAAAGTGCCTATTTATTTTCTATTGGTATCTATGGATTGATCACAAGTCGAAACATGGTTAGAGC  
ACTTATGTGTCTTGAACCTATACTGAATGCTGTTAATATGAATCTCGTAACATTTTCTGATTTATTTGATAGTCGCCAAT  
TAAAGGGAGACATTTTCTCGATCTTTGTTATCGCTATTGCAGCCGCCGAAGCAGCTATTGGACCAGCTATTGTTTCTTCA  
ATCTATCGTAACAGAAAATCAACTCGTATCAATCAATCAAATTTATTGAATAAATAAATGGAACGCACATATCAATATGC  
ATGGATTATACCTTTTCGTTCCGCTTCTAGTTACTATGTTAATAGGATTGGAACCTCTGCTTAATCCGACAGCAACAAAA  
ATATTCGTGCTATATGGGCTTTTCCCGCTGTTTTATTGTTAAGTATAGTTATGGTCTTTTCCACCAAGCTGGCGATCCAG

CAAATAAATGGTAGCTCAATTTATGAATATCTATGGTCTTGGAGCATCACTAGTGATTTTTCTTAGAGTTCGGCTACTT  
GATTGATCCACTTACTTCTATTATGTCGATATTAATCACTACTGTTGGAATCATGGTTCCTATCTATAGTGATAATTATA  
TGTCTCATGACCGAGGATATTTGAGATTTTTGCTTATATGAGTTTTTCAATACAGCGATGCTGGGATTAGTTACTAGT  
CCCAATTTGATACAAATCCATATTTTTGGGAACTAGTGGGAATGTGTTCCATCTGTTAATAGGTTTTGGTTTTACCCG  
ACCAATTGCAGCAAATGCCTGCCAAAAGCGTTTGTGACCAATCGTGTGGGGGATTTGGTTTTATTATTAGGAATCCTAG  
GTTTTTATTTAATAACAGGTAGTTTTCGAATTTTCAGGATTTATTCGAAATATTCAATGATTTCGATCATT-----  
AATAACAATGAG-----  
ATTAATTCCTCATTGCTACGCTTTGTGCCTTCTTATTATTCCTTGGTGCAGTTGCTAAATCTGCGCAATTCCTACTTCA  
TGTATGGTTACCTGATGCTATGGAGGGACCCACTCCTATTTTCGGCTCTTATACATGCGGCTACTATGGTAGCCGCAGGAA  
TTTTCTTGTAGCTCGGCTTCTTCTCTTTTCATAGCCATACCTTACATAATGAATATCATATCTTTGATAGGTGTAATA  
ACGGTACTATTAGGAGCTACCTTAGCTCTTGTCAAAGAGATATTAAGAGAAGTTAGCTTATCCACGATGCTCAATT  
GGGCTACATGATGTTAGCTTTGGGTATAGGTTCTTATCGAGCCGCTTTTATTCCATTTGATCACTCATGCTTATTCTAAG  
CATTATTGTTTTTAGGGTCTGGATCCATCATTCCATGGAACCCATTGTTGGGTATTCTCCGGCTAAGAGTCAGAAC  
ATGGTTCTTATGGGCGGTTAACCAAATATATGCCAATTACAAAACAACCTTTTTTTTTAGGTACACTTTCTCTTTGTGG  
TATTCCACCCCTCGCTTGTTTTTGGTCCAAAGACGAAATTCTTAATGATAGTTGGTTGTATTACCGATTTTTGCAATAA  
TAGCTTTCTACACAGCAGGATTAAGTGCATTTTATATGTTTCGTATGATTTACTTACTTTTCGAAGGGCATTACGTAGT  
CATTTCAAAATTACAGCGGACACACAAATAGTTTCTTATTCAATATCCATATGGGGGCAAGAAGTTCCAAACCTGT  
TAGC-----AGTAAT-----TTGCTT-----TTAACAACA-----AGGAATAATAAT-----  
GACAAGTCTCTCTTTTCCAATTGCTCGTTTTCTAAT-----ACA---TAT---AAA-----ATTGCCGGTTATGTA--  
-AGAACC-----ATGCGA-----TCATCTTTTAGTACT-----CACTTTTTA---AAT-----  
AAAGACTCTCATACT---  
TTACTATACCCGCATGAATCGGACAATACCATGTTATTTCCCCTGCTTATATTGGCCATATTTACTTTGTTTCGTTGGATG  
CATAGGAATT---CATTT-----  
GGGCACGAAGTAATGGAGGTTGACATATTATCGAAATGGTTAACCCCATCGATG-----  
AAACTTTTCCATCAGAATCAACTGAT-----GAAGATTGG-----  
TATAAATTTTGCAGAAATGCATTTTATTTCAGTTAGTATAGC  
Oenothera  
CTCATTGCTATTACTCAAACAAGCATGAAACGTATGCTTGCATATTCGTCCATAGGTCAAATCGGATATGTAATTATTGG  
AATAATTGTTGGAGACGCAAACGGTGGATATGCGAGCATGATAACTTATATGCTGTTCTATATCTCCATGAATCTAGGAA  
CTTTTGTCTGCATTGTATTATTTGGTCTACGTACCGGAACTGATAACATTTCGAGATTATGCAGGATTATACACGAAAGAT  
CCTTTTTGGCTCTCTCTTTAGCCCTATGTCTCTTATCCCTAGGAGGTCTTCTCCACTAGCAGGTTTTTTTCGGAAAAC  
CCATTTATTCTGGTGTGGGTGGCAGGCAGGCCTATACTTCTTGGTTTTCAATAGGACTCTTTACGAGCGTTGTTTCTATCT  
ACTATTATCTA-----AAAATAATCAAGTTATTAATGACT-----  
GGACGAAAGCAAGAAATAACACCTCACGTGCGAAATTATAGAAGA-----TCCCCT-----TTA-----  
AGATCAAACAATTCCATCGAATTGAGTATGATTGTATGTGTAATAGCATCCACTATAACCAGGAATATCAATGAACCCGAT  
TATTGCAATTGCTCAGGATACCCTTTTTTAG-----  
ATGTTTCTGCTTTACGAATATGATATTTTCTGGGCATTTCTAATAATATCA-----  
AGTGTTATTCCATTTTTGGCATTTCGAATTTCCGGACTTTTAGCCCCGACTAGCATAGGGCCAGAGAACTTTTCGAGTTA  
TGAATCGGGTATAGAACCAATGGGCGATGCTTGGTTACAATTTTCGAATACGTTATTATATGTTTGGCTTTAGTTTTTGTG  
TTTTTGATGTTGAAACCATTTTTCTTTATCCATGGGCACTGAGTTTCGATATATTGGGGGTATCCGATTTTATAGAAGCT  
CTCATTTTCGTGCTTATCTTAGTTCTTGGTTTTGGTTTTATGCATGGCGAAAAGGAGCGTTGGAATGGTCTTAG-----  
-----ACGAATTCCTTT-----  
CCTTGGTTAACAATAATTGTAGTTTTTCCCATATTGACGGGTTCTTTAATTTTCTTGCTACCT-----  
CATAGAGGTAATAAG-----  
GTCATGAAATGGTATACTTTATGTATATGTATTTTAGAGCTTCTTTTAAACAACCTATAACATTCTGTTATCATTTC-----  
-----CAACTGGACGATCCATTAACCCAACTAACAGAGAATTATAAATGGATCCAT---  
TTTTTTGATTTTTATTGGAGATTAGGAATAGATGGGCTTTCTATAGGACCTATTTTATTGACGGGATTTATTACCACTTT  
AGCAACTTTAGCGGCTGGCCAGTTACTCGAGATGCCAATTGTTCCATTTTTTATGTTAGCAATGTACAGCGGTCAA  
TAGGATCATTTTTCTCTAGAGACCTTTTACTTTTTTTTCTAATGTGGGAGTTTCGAATTAATTCCCGTT---  
TATCTACTTCTATCGATGTGGGGGGGAAAGAAACGTCTCTATTTCAGCTACAAAGTTTCATTTTGTACACGGCGGGTGGGTC  
CATTTTTCTATTAATAGGAGTTCTGGGTATTGGTTTATATGGTTCCAATGAACCAACACTCAATTTTGAACATTAGCGA  
ATCAGTCGTATCCTGTGGCACTCGAAGTAATATTCTATGTGGGATTTCTTATTGCTTTTTCGGGTCAAATTGCCGATTATA  
CCCCTCCATACATGGTTACCAGATACACATGGGGAAGCACATTATAGTACGTGTATGCTTCTAGCTGGAATCTTATTAAA  
AATGGGAGCTTATGGGTTGGTTTCGAATCAATATGGAATTATTACCTCATGCTCATTGCCTATTTTCTCCCGGGTTGATTA  
TAGTAGGTGCAATACAAATAATCTATGCAGCTTCAACATCTCTGGTCAACTTAATTTAAAAAAAAGAATAGCCTATTCC  
TCTATATCTCATATGGGTTTTATAATTATTGGAATTGGTTCTCTAAGCGATACGGGACTTAATGGAGCCATTTTACAAT  
AATCTCTCATGGCTTTATTGGG-----

GCGGCTCTTTTTTCTTGGCCGGAACGAGTTATGATAGAATACGCCTTCTTTATCTCGATGAAATGGGTGGAATGGCT--  
-----

ATCCCCCTTCCAAAATTATTTACGATGCTCAGTATCTTATCGATGGCTTCGCTTGCATTACCGGGCCTGAGCGGTTTTGT  
TGCCGAATTATTAGTATTCTTTGGCATAAATTACCAGTCAAAAGTATCTTTAATGCCAAAATACTAATTGCTTTTTTAA  
TGGCAATTGGAATGATATTAACCTCTATTTATTCATTATCTATGTTACGC-----  
CAAATGTTCTACGGATACAAG-----CTATTTAATGTTCCAAAC---TATTAT-----  
TTCTTTGATTCTGGTCCGCGAGAGTTATTTGTTTCGATCTCTCTCCTTCTACCAATAATTGGGATTGGTATTTATCCGGA  
TTTCGGTCTGTCAATTATCGGTTGAAAAAGTAGAAGCTATTATATCTCATTTTTTTTTTTCGATAG-----  
ATGATACTC-----

GAACATGTACTTGTGTTGAGTGCCTATTTATTTTCTATAGGTATTTATGGATTGATCACGAGTCGAAATATGGTTCGGGC  
TCTTATGTCCCTTGAACCTATACTGAATTCGGTTAATCTTAATTTTCGTAACATTTTCGGATTTTTTGTAGTTCGCCAAT  
TAAAAGGAGATATTTTTTCCATTTTTATTATAGCTATTGCAGCCGCCGAAGCCGCTATTGGGTTGGCTATTGTTTCGTCA  
ATTTATCGTAACAGAAAATCAATTCGTATCAATCAATCCAATTTATTGAATAAGTAGATGGAATATACATATCAATATTC  
ATGGATTATACCTTTCAATCCACTACCAGTTCCTATTCTAATAGGAATGGGACTTCTACTTTTTCCGACAGCAACAAAA  
ATCATCGTCGTGTGGTCTTTTTCTAGCATTACTGTTAAGCATGGTTATGCTTCTTTCCGCTCTATCTCTATTCAA  
CAAATAAATAGAAGTTTTATCTATCAATATGTATGGTCTTGGACCATTAATAATGATTTTTCTTTAGAGTTCGGTCACTT  
AATCGATCCACTTGTCTTATTATGTTAATATTAATTACTACTGTTGGAATTTTGGTCTTTTTTATAGTGATAATTATA  
TGTCTCATGATCAAGGATATTTGAGATTTTTGCTTATCTGAGTTTTTCAATACCTCAATGTTAGGATTAGTTACTAGT  
TCTAATTTGATACAAATTTATATTTTTGGGAATTAGTTGGAATGTGTTCTTACCTATTAATAGGTTTTTGGTTCACGCG  
ACCTATTGCAGCAACTGCTTGTCAAAAAGCTTTTGTAACTAATCGTGTAGGGGATTTTGGTTTTATTATTAGGAATTTT  
GTCTTTATTGGATAACGGGTAGTTTTGAATTTAGGGATTTGTTCGAAATAGTGAATAACTTAATTGAT-----AAT---  
AATGAA-----

GTTCAATTTTTATTTGTTACTTTGTGTTCTTTCTCTTATTTGCTGGTGCAGTTGCTAAATCGGCGCAATTCCTCCCTTCA  
TGTATGGTTACCTGATGCCATGGAAGGGCCCACTCCTATTTCCGCTCTTATCCATGCCGCTACTATGGTAGCCGCGGGCA  
TTTTTCTTGTAGCTCGGCTTCTTCTCTTTTTGTAATCACACCTTACATAATGAATTTGATATCTTTGATAGGTATAATA  
ACAGTACTATTAGGAGCTACTTTAGCCCTTGCTCAAAAAGATATTAAGAAGTTAGCTTATTCTACAATGTCTCAACT  
GGGTTATATGATGTAGCTCTAGGTATGGGTTCTTATCGAGCTGCTTTATTTTCAATTTGATTACTCATGCTTATTTCAAAG  
CATTGTTGTTTTTAGGCTCCGGATCCATTATTCATTCAATGGAATCCATTGTTGGCTATTTCCAGATAAAAAGCCAGAAT  
ATGTTCTTATGGGCGGTTTTAAAAAAGCATACCAATCACAAAAACGGCTTTTTTGGTGGGTACGCTTTCTCTTTGTGG  
TATTTCCACCTCTTGTGTTGTTTTGGTCCAAAGATGAAATTTCTAATGATAGTTGGTTGTATTTCGCAATTTTCGCAATA  
TAGCTTGTTCACAGCAGGATTTCACTGCATTTTTATATGTTTCGTGTTTATTTACTTACTTTTTGATGGACATTTAAACGTT  
CATTTTTCAAATTTATAGTGGTCAAAAAGTAGCTCCGCTATTCAATATCTTTATGGGGAAAACAAGTACCAAAAAGGAT  
TCAA-----AATCCG-----TTTTGTTTATTAATTTATTGACA-----ATGAATAATAAT-----  
GAAAGTACGTCTTTT-----TTTTGGAATAAC---AAA---TGT---AAA-----CTTGATGGTAATGTA--  
-AAAAAG-----AGGATA-----CGCCCTTTTATTACTGTTACT-----CATTTTCCG---AAT-----  
AGAAAG-----ACT---

TTTTCTTATCCCCTAGAGTCGGACAATACTATGCTATTTTCCCTCTTTGTATTAGTGCTCTTTACTTTGTTTGTTCAGC  
CATAGGAATT---CCTTTT-----

AATCAAGAAGGAAGTGATTGCGATATATTATCAAAATTGTTAAATCCGTCTATA-----

AACCTTTTACATCAAAATTCAAATAAT-----TTTACGGATTGG-----

TATGAATTTGTGACCAATGCAAGTTTTTCCGTCAGTATAGC

*Oryza*

CTCCTTGCTATTACTCAAACAAGCATGAAACGTATGCTTGCATATTCGTCCATAGGGCAAATCGGATATGTAATTATTGG  
AATAATTGTTGGAGACTCAAATGATGGATATGCAAGCATGATAACTTATATGCTTTTCTATATCTCCATGAATCTAGGAA  
CTTTTGTGCTGCATTGTATTATTTGGTCTACGTACCGGAACTGATAACATTCGAGATTATGCAGGATTATACACGAAAGAT  
CCTTTTTTGGCTCTCTCTTTAGCCCTATGTCTCTTATCCCTAGGAGGCCTTCTCCACTAGCAGGTTTCTTCGGAAAAC  
CTATCTATTCTGGTGTGGATGGCAAGCAGGCCTATATTTCTTGGTTTTCAATAGGACTCCTTACGAGCGTTCTTTCTATCT  
ACTATTATCTA-----AAAATAGTCAAGTTATTAATGACT-----

GGACGAAACCAAGAAATAACCCCTTATGTGCGAAATTATAGAAGA-----TCCCCT-----TTA-----

AGATCAAACAATTCCATCGAATTGAGTATGACTGTATGTGTGATAGCATCTACTTATACCAGGAATATCAATGAACCCCAT  
TCTTGCAATTGCTCAGGATACCCTCTTTTAG-----

ATGTTTCTGCTTACGAATATGATATTTTTTGGGCATTTCTAATAATAGCA-----

AGCCTTATTCCTATTTTAGCATTTTGGATTTTCAGCACTTTTAGCTCCGGTTCGTGAAGGACCAGAGAAGCTTTCTAGTTA  
TGAATCGGGTATAGAACCCATGGGGGGGGCTTGGTTACAATTCGAATACGCTATTACATGTTTGCCTAGTTTTTGTG  
TTTTTGATGTGAAACGGTCTTTCTCTACCCTTGGGCAATGAGTTTCGACGATTGGGTATATCCGTTTTTATCGAAGCT  
TTCATTTTCGTGCTTATCCTAGTTGTTGGTTTTAGTTTTATGCATGGCGAAAAGGAGCCTTGGAAATGGTCTTAA-----  
-----ATGAGTTCTTTT-----

CCTTGGTTAACAATACTTGTGTTTTGCCGATATTTGCGGGTTCATTAATTTTTCTTTTTACCT-----  
CATAGGGGAAACAAA-----  
ATCGTTAGGTGGTATACTATGTCTATTTGTTTATTAGAATTCCTTCTAATGACTTATGCATTCTGTTATCATTTC-----  
-----CAATTGGAGGATCCCTTAATCCAATTAAGAGGATTCTAAATGGATAGAT---  
GTCTTCAATTTCCACTGGAGATTGGGAATCGATGGACTTTCATTAGGATCTATTTTATTGACAGGATTTATGACTACTTT  
AGCTACTTTTAGCAGCTTGGCCGGTTACCCGGAATTCCTCGATTATTCTATTTCTGATGCTAGCAATGTATAGCGGTCAA  
TAGGATTATTTTCTTCGCGAGACCTTTTACTTTTTTTTATCATGTGGGAGTTAGAATTAATTCCTGTT---  
TACTTACTTTTATCCATGTGGGGGGGAAGAGGCGTCTCTATTACAGCTACAAAGTTTATTTTGTATACTGCAGGTGGTTC  
CATTTTTTTCTTAATCGGAGTTCTAGGTATGGGCTTATACGGTTCACGAACCAAGATTAGATTTGGAAAGATTAATTA  
ATCAATCATACCCTGCAACATTGGAAATACTATTTTATTTGGCTTCCTTATTGCTTATGCTGTCAAATGGCGATTATA  
CCCTACATACGTGGTTACCAGATACCCATGGGAAGCGCATTACAGTACATGTATGCTTTTAGCGGGAATCCTATTAAA  
GATGGGAGCATACGGATTGATTCGGATCAATATGGAATTGTTACCTCATGCTCATTATCTATTTTCCCCTTGGTTAGTAA  
TAATAGGAGCGATGCAAATAATCTATGCAGCTTCAACTTCTCTTGGCCAACGCAATTTCAAAAAAGAATAGCCTACTCC  
TCCGTCTCTCACATGGGTTTATTATTATAGGAATTGGTTCATAACCAACATTGGACTCAATGGAGCTATTTTACAAAT  
ATTATCCCATGGATTTATTGGG-----  
GCTACACTTTTTTTCTTAGCGGGAACGGCTTGTGATAGAATGCGCCTTGTTTATCTCGAAGAAGTGGGAGGGGCTTCT--  
-----  
ATCCCAATGCCAAAAATTTTTACCATGTTTAGTAGCTTTTCAATGGCTTCTCTTGCCTTACCAGGAATGAGTGGTTTTGT  
TGCGGAATTAGTAGTATTTTTGGACTAATTACTAGTCCAAAATTTCTGTTAATGCCAAAAATGCTAATTACTTTTTGTAA  
TGGCAATTGGAATGATATTAACCTCTATTTATTTATTATCTATGTTACGA-----  
CAGATGTTCTATGGATACAAG-----CTATTTTCATGTTCCAAAC---GAAAAT-----  
TTTGAGGATTCCGGCCCGCAGAACTCTTTCTTTTAACTGTATCTTTTTACCAGTAATAGGAATCGGTATTTATCCAGA  
TTTTGTTCTCTCGCTATCCGTTGACAGGGTAGAGGCTCTGTTATCCAATTATTATCTTAAATAG-----  
ATGATGTTT-----  
GAGCATGTACTTTTTTGTAGTGTCTATTTATTTTCGATTGGTATCTATGGATTGATCACAAGCCGAAACATGGTTAGAGC  
TCTAATATGCCTTGAACCTTATACTGAATCAATTAATCTAAATCTCGTAACATTTTCTGATCTATTTGATAGCCGCCAAT  
TAAAAGGAGACATTTTCGCAATTTTTGTTATAGCCCTTGC GGCTGCTGAAGCAGCTATTGGATTATCCATTCTTTCTTCC  
ATCCATCGTAATAGGAAATCAACTCGTATCAATCAATCAATTTTTGAATAATTAGATGGAACATACATCAATCAATATGC  
ATGGGTAACCTCTTCTCCACTTCCAGTTATTATGTCAATGGGGTTTGGACTTTTTCTTGTTCACATGCAACAAAA  
ATCTTCGTCGCATATGGGCTTTTCTAGTGTTTTACTTTTAAAGTATAGCTATGGTATTCTCAGTTCACCTGTCTATTCAA  
CAAATAAATGGAAGTTCTATCTATCAATATCTATGGTCTTGGACCGTCAATAATGATTTTTCTTAGAATTTGGATACTT  
AATCGACCCGCTTACTTCTATTATGTTAATACTAATTACTACTGTAGGAATCCTGGTTCCTATTTATAGTGATGATTATA  
TGTCTCACGATGAGGGATATTTGAGATTTTTTGTATATAAGTTTTTCAATACTTCCATGTTGGGATTGGTTACTAGT  
TCCAATTTGATACAAATTTATTTTTTTGGGAGCTTGTGGGAATGTGTTCTATTTATTGATAGGCTTTTGGTTTACACG  
GCCAATTGCAGCGAGTGTCTGTCAAAAAGCTTTTGTAACTAATCGTGTAGGGGATTTTGGTCTGTTATTAGGAATTCTAG  
GTTTTTTTTGGATAACAGGTAGTTTAGAGTTTCCGGATTTGTTTAAAATAGCTAATAACTGGATTCTCT-----AAT---  
AATGAG-----  
ATTAACCTCTTGTACTATTTTTGTGTGCTTTTTTATTATTCCTTGGTGC GGTTGCGAAATCGGCACAATTCCTCTTCA  
CGTATGGTTACCCGATGCTATGGAAGGACCCACCCCATTTTCAGCTCTTATACACGCAACAACATGTTTGGTGC GGGGGA  
TTTTTCTTATAGCTCGACTTCTTCTCTTTTTCATATCCCTACCTTTGATAATGAGTTTCATTTCTTTAATAGGTACACTA  
ACACTTTTCTTAGGAGCCACTTTAGCTCTTGTCTCAGAGAGATATTAAGAAGCTTAGCCTATTCTACAATGTCTCAATT  
GGGTTATATGATGTTAGCTCTAGGTATAGGTTCTTATCAAGCTGCTTTATTCCATTTGATCACTCATGCTTATTGAAAG  
CTTTATTATTCTTGGGATCCGGATCTGTTATTCATTCAATGGAACCTCTTGTGGATATTCACCAGATAAAAGTCAGAAT  
ATGGTTCTTATGGGTGGTTAAGAAAATACATTCCAATTACAAGAACTTGTTTTTTATGGGGTACCCTTTCTCTTTGTGG  
TATTCCACCTCTTGTCTGCTTCTGGTCCAAAGATGAAATCCTTAGTAATAGTTGGTTATATTCACCCTTTTTTGGAAATA  
TAGCTTCTTTTACTGCAGGATTAACCTGCGTTTTATATGTTTCGGATATATTTACTTACTTTTGTATGGGATTTTGC GTGT  
CATTTTCAAAATACAGTAGTACTAAAGAGGATTCGTTGATTCAATATCGTTATGGGGAAAAGGATATCTAAAGGAGT  
CAAT-----AGAGAT-----TTCGTT-----TTATCAACA-----GCGAAGAGT-----  
GGAGTTTCTTTT-----TTTTCAAAAAT---CTA---TCC---AAA-----ATTCATGTTAATACA---  
GGAAAT-----AGGATA-----GGTCTTTAGTACT-----TCATTGGGG---ACT-----  
AAAAAC-----ACT---  
TTTGTCTATCCTCATGAACCGGAAATACTATGCTATTTCTCTTCTTATATTACTGCTTTGTACTTTGTTTATTGGATC  
TATAGGAATC---CATTTT-----  
GATAATGAAATAGGGGAATTAACCATATTATCAAAGTGGCTAACTCCCTCAATC-----  
AACTTTTTCCAAGAAAGTTCTAATTCG-----TCCATAAATTC-----  
TATGAATTTATCACTAATGCAATTTCTTCTGTAAGTCTAGC



Panax

CTCATTGCTATTACTCAAACAAGCATGAAACGTATGCTTGCATATTCGTCCATAGGTCAAATCGGATATGTAATTATTGG  
AATAATTGTTGGAGACTCAAATGATGGATATGCAAGCATGATAACTTATATGCTGTTCTATATCTCCATGAATCTAGGAA  
CTTTTGGCTTGCATTGTATTATTTGGTCTACGTACCGGAACTGATAACATTTCGAGATTATGCAGGATTATACACGAAAGAT  
CCTTTTTGGCTCTCTCTTTAGCCCTATGTCTCTTATCCCTAGGAGGTCTTCTCCACTAGCAGGTTTTTTTCGGAAAAC  
CTATTTATTCTGGTGTGGATGGCAGGCAGGCCTATATTTCTTGGTTTTAATAGGACTCCTTACAAGCGTTGTTTTCTATCT  
ACTATTATCTA-----AAAATAATCAAGTTATTAATGATT-----  
GGACGAAACCAAGAAATAACCCCTCACGTGCGAAATTATAGAAGA-----TCTCCT-----TTC-----  
AGATCAAACAATTCATCGAATTGAGTATGATTGTATGTGTGATAGCATCTACTATACCAGGAATATCAATGAACCCGAT  
TATTGCAATTGCTCAGGATACCCTTTTTTAG-----  
ATGTTTTCTGCTTTACGAATATGATATTTTTGGGCATTTCTAATAATATCA-----  
AGTCTTATTCTATTTTGGCATTTTTTCATTTCCGGGGTTTTAGCCCCGATTAGCAAAGGGCCAGAGAAACTCTCTAGTTA  
TGAATCGGGTATAGAACCAATGGGCAATGCTTGGTTACAATTTGCAATCCGTTATTATATGTTTGGCTCTAGTTTTTGTG  
TTTTTGATGTTGAAACAGTTTTTCTTTATCCATGGGCAATGAGTTTCGATGTATTAGGTGTATCTGTATTTATAGAAGCT  
TTAATTTTCGTGCTTATCTTAATTGTTGGTTAGTTTTATGCATGGCGAAAGGGGGCATTGGAATGGTCTTAG-----  
-----ACGAATTTTTTT-----  
CCTTGGTTAACAATAATTGTAGTTTTGCCAATATTCGCGGGCTCCGTAATTTTTCTTTCTTCCC-----  
CATAGAGGAAATAGA-----  
GTAATTCGGTGGTATACCATATGTATATGTATTTTAGAACTCCTTCTAACGACCTATGCATTCTGTTATCATTTT-----  
-----CAATTCGACGATCCATTAATCCAACCTGGTGGAGGACTATAAATGGATCAAT----  
TTTTTTGCTTTCCATTGGAGATTAGGAATAGATGGACTTTCTATAGGACCCATTTTACTAACGGGATTTCATCACCCTTT  
AGCTACTTTAGCGGCTCGGCCAGTTACTCGAGATTCTCGATTATTCATTTCTGATGTTAGCAATGTACAGCGGGCAA  
TAGGATCATTTTCTTCTCGGGACCTTTTACTTTTTTTCATCATGTGGGAGTTTGAATTAATTCGGTT---  
TATCTACTTTTATCCATATGGGGGGGAAAGAGACGACTTTACTCGGCTACAAATTTTTATTTTATACACGGCGGGAGGTTT  
CATTTTTCTATTAATGGGAGTTCTGGGTGTTGGTTTATATGGTTCTAATGAACCAACATTAAATTTTGAACATCAGTTA  
ATCAGTCATATCCTGTGGCCTTGGAAATAATATTCTATATTGGATTTTTTATTGCTTTTGGCTGTCAAATCGCCGATTATA  
CCCCTACATACATGGTTACCAGATACCCACGGAGAAGCACATTACAGTACTTGTATGCTTCTAGCCGGAATTTTACTAAA  
AATGGGAGCGTATGGATTGATTTCGGATTAATATGGAATTATTACCCACGCCCATTCTATATTTTCTCCGTGGTTGGTGA  
TAGTAGGCACAATACAAATAATCTATGCAGCTTCAACATCTCCCGCCAACGTAATTTAAAAAAAAGAATAGCCTATTCC  
TCTGTATCTCATATGGGTTTCACTATTATAGGAATTGGTTCTATAACCGATACGGGACTCAATGGAGCTATTTTACAAT  
AATCTCTCATGGATTTATCGGT-----  
GCTGCGCTTTTTTTCTTGGCAGGAACGAGTTATGATAGAATACGTCTTGTATTATCTCGACGAAATGGGCGGAATAGCT--  
-----  
ATCCCAATGCCAAAAATATTCACGATGTTCACTAGCTTTTTCGATGGCTTCCCTTGCATTACCGGGTATGAGTGGTTTTGT  
TGCAGAATTGATAGTCTTTTTTGAATAAATTACCAGCCAAAAATATCTTTTAAATGCCAAAAATCTTAATTACTTTTTGTAA  
TGGCAATTGGGATGATATTAATCCTATTTTATTCAATTATCTATGTTACGC-----  
CAGATGTTCTATGGATAACAAG-----CTATTTAATGCTCCAAAC---TCTTAT-----  
GTTTTTGATTCTGGACCGAGAGAGTTATTTGTTTCGATCTCTATCTTTTCTACCCGTAATAGGTATTGGTATGTACCCGGA  
TTTTGTTCTTTCACTATCAGTTGACAAGGTGCAAGTTATTCTATCTAATTTTTTTTTATAGATAG-----  
ATGATGCTC-----  
GAACATGTACTTGTTTTTGAGTGCCTATTTATTTTCTGTTGGTCTTTATGGATTGATCACGAGTCGAAATATGGTTAGGGC  
CCTTATGTGTCTTGAACCTATTTTGAATGCAGTTAATATCAATTTTGTAAACATTTTCTGATTTTTTTGATAGTCGTCAAT  
TAAAAGGAGCCATTTTCTCCATTTTGTATAGCTATTGCAGCCGCTGAAGCAGCTATTGGACTGGCTATTGTTTCATCA  
ATTTATCGTAACAGAAAATCAATTCGTATCAATCAATCGAATTTGTTGAATAAGTAGATGGAACAGACATATCAATATGC  
GTGGATAATACCTTTCTTCCACTTCCAGTTCCCTATGTTAATAGGAGTGGGACTTCTTCTTTTTCCGACGGCAACAAAA  
ATCTTCGTGATGTGGGCTTTTCAGAGTGTTTTATTGTTAAGTATAGTCATGATTTTTTTCGATCAATCTGTCTATTTCAG  
CAAATAAATAGCAGTTCTATCTATCAATATGTGTGGTCTTGGATCATCAATAATGATTTTTTCTTTAGAATTCGGCTACTT  
GATCGACCCACTTACTTCTATTATGTCAATATTAATACTACTGTTGGGATTGTGGTTCTTGTTTTATAGTGATAAATTATA  
TGTCTCATGATCAAGGATATTTGAGATTTTTCGCTTATATGAGTTTTTTCAGTACTTCTATGTTAGGATTAGTTACTAGT  
TCTAATTTGATACAAATTTATATTTTTTGGGAATTAGTCGGGATGTGTTTCGATCTATTAATAGGGTTTTGGTTTCACACG  
ACCTGTTGCGGCAAAATGCTTGGCAAAAGGCGTTTGTAACTAATCGTGTGCGGGGATTTTGGTTTTATTATTAGGAATTTTAG  
GTTTTTATTGGATAACAGGTAGTTTTCGAATTTTCAGATTTATTCAAATATTCAGTAACTTGATTTAT-----AAT---  
AATGAA-----  
GTGAATTTTTTATTTGTTACTTTGTGTGCCGTTCTATTTTGGCCGTTGCGGTTGCTAAATCTGCACAATTCCTCCCTTCA  
TGTATGGTTACCTGATGCCATGGAGGGCCTACTCCTATTTTCAGCTCTTATACATGCTGCTACTATGGTAGCAGCGGGAA  
TTTTTCTTGTAGCTCGGCTTATTCCTCTTTTTCATAGTCATCCCTCACATAATGAATTTAATCTCTTTGGTAGGGATAATA  
ACAGTATTATTAGGAGCTACTTTAGCCCTTGCTCAAAAAGACATTAAGAGAGGTTTGGCCTATTCCACAATGTCTCAATT

GGGTTATATGATGTTAGCTTTAGGTATGGGGTCTTATCGAAGTGCTTTATTTTCATTTGATTACTCATGCTTATTCGAAAG  
CATTATTGTTTTTAGGATCCGGATCCGTTATTTCATTCAATGGAACTCTTGTGGATATTCTCCAAAGAAAAGCCAGAAT  
ATGGTTTTTATGGGGGGTTAACAAGCATGTGCCAATTACCAAACGTCTTTTTTATTTCGGTACACTTTCTCTTTGTGG  
TATCCGCCTCTTGCTTGTGGTCCAAGGATGAAATTATTAATGATACTTGGTTGTATTACCAATTTTTGCAATAA  
TAGCTTGGTCTACAGCGGGATTAACCGCATTTTATATGTTTCGAATCTATTTACTTACTTTTGAAGGACATTTAAACGTT  
CATTTTCAAATTAC-----  
AAAAATACCCCCTTCTATTCAATATCTCTATGGGGTAAAGAAGGTTTCGAAAAGGATTAAT-----AAAAAT-----  
TTTCCTTTATTAACCTTTATTAACA-----ATGAATAATCAT-----GAAATTGCTTCTTTT-----  
TTTTCAAAGAAG---ACA---TAT---CAA-----ATGGATCAGAATGTA---AGAAAC-----ATCACA-----  
-CAACCCTTTATTACTATTACC-----TATTTTGGC---AAT-----AGAAT-----ATT---  
TTTTTCATATCCTTATGAATCAGATAATACTATGTTATTTCTATACTTGTATTGGTTCTATTCACTTTGTTTCATTGGATT  
CCTAGGAATT---CCTTT-----  
AATCAAGAAGGAGCGAATTTGGACATATTATCCAAATGGTTAACCCCGTCTATA-----  
AACCTTTTACATCAAAATTTAAATAAT-----TTAATAGATTGG-----  
GATGAATTTGCGAAAGATGCCATCTTTTCAGTTAGTATAGC

Pelargonium

CTCATTGCTATTACTCAAACAAGCATGAAACGTATGCTTGCATATTTCGTCCATAGGTCAAATCGGATATGTAATTATTGG  
AATAATTGTTGGAGACTCAAATGGTGGATATGCGAGCATGATAACTTATATGCTCTTCTATATCTCCATGAACCTAGGAA  
CTTTTGTCTGCATTGTCTTATTTGGTCTACGTACCGGAAGTATAACATTTCGAGATTATGCAGGATTATACACAAAAGAC  
CCTTTTTTGGCTCTCTCTTTAGCCCTATGTCTCTTATCCCTAGGAGGTCTTCCCCACTAGCAGGTTTTTTTCGGAAAAC  
CCACTTATTCTGGTGTGGATGGCAGGCAGGCCTATCTTTCTTGGTTTCAATAGGACTCCTTACGAGCGTTCTTTCTATCT  
ACTATTATCTC-----AAAATAATCAAGTTATTAATGACT-----  
GGACGAAACCAAGAAATAACCCCTCACGTGCGAAATTATAAAAGA-----TCCCCT-----TTA-----  
AGATCCAAAAATTCATCGAATTGAGTATGATTGTATGTGTTATAGCATCTACTATAACCAGGAATATCAATGAACCCGAT  
TATTGCAATTGCTCAGGATACCCTTTTTTAG-----  
ATGTTTCTGCTTTACGAATATGATCTTTTCTGGGTCTTTCTAATAATATCA-----  
AGTCTTATTCCTATTTTGGCATTCTAATTTCCGGCGTTTTAGCCCCAATTAGCGAAGGGCCGGAAAAACTTTTCGAGTTA  
TGAATCGGGTATAGAACCAATGGGCGATGCTTGGTTACAATTTAGAATACGTTATTATATATTTGCTCTAGTTTTTTGTTG  
TTTTTGATGTTGAAACGGTTTTTCTTTATCCATGGGCAATGAGTTTCGACGTATTGGGGGTATCCGTATTTATAGAAGT  
TTGGTTTTCGTGCTTATCCATAATTTGGTTTCAGTTTATGCATGGCGAAAGGGAGCATTGGAATGGTCTTAG-----  
-----GTGTATCTTGTCTTTACCACGAATGATTTT-----  
CCTTGGTTAACACTAATTGTTATTTTTCCGATCTCAGCGGGTCTTTTCTTTTCTTCCCTCCCC-----  
CATAGAGGAAATAAG-----  
GTAATAAATGGTATACTTTGTGCGTATGTTCACTAGAACTCCTTCTAACGACCTATACATTCTGTTATCATTTT-----  
-----CAATTGGACGATCCATTAATCCAACCTTGTGGAGGATTCTAATGGATCTTT---  
TTTTTTTCATTTTGACTGGAGATTGGGAATAGATGGACTCTCCTTCGGACCCATTTTACTGACGGGATTTATCACCCTTT  
GGCTACTTTAGCGGCTTGGCCCGTTACTCGAGATTCCCGATTATTCCATTTTCATGATGTTAGCAATGTACAGTGGTCAAA  
TAGGATCATTTTTCTTCTCAGGATCTTTTGTCTTTTTTTCATGATGTGGGAGCTCGAGTTAATTCCCCTTT---  
TATTTACTTTTTATCCATGTGGGGGGGAAAGAAACGCCTGTATTTCAGCTACAAAGTTTTATTTTGTACACTGCAGGAAGCTC  
GATCTTTTTATTAATAGGCGTTCTAGGTATCGGGTTATACGGTTCCAACGAGCCAACATTCAATTTTGAATATCAGCTC  
ATAGATCGTATCCTGCGGCACTAGAAATAATATTCTATATCGGCTTTCTTATTGCTTTTGTGTCAAATCACCGATTATA  
CCCTTACATACATGGTTACCAGACACTCATGGAGAGGCCATTACAGTACTTGTATGCTTCTCGCCGGAATCTTATTA  
AATGGGAGCTTATGGATTAGTTCCGATCAATATGGAATTATTGCCCATGCGCATTCTATATTTGCCCTACTTGGATTA  
TAGTAGGTGCAATCCAAATAGTTTATGCAGCTTCAACATCTCTTGGTCAACGTAATTTAAAAAAGAATAGCCTACTCA  
TCTGTATCTCATATGGGTTTATAAATTATAGGAATTGGCTCTATAACGGATGCAGGACTCAGCGGAGCTCTTTTACAAAT  
AATATCTCATGGATTTATTGGT-----  
GCTGCTCTTTTTTCTTGGCAGGGACTAGTTATGATAGAATACGTCTTGGTTTTTTTCGACGAAATGGGTGGAATGGCC--  
-----  
GTCGCCATTCCGAAAATCTTTACCATGTTCAAGTATCTTATCCATGGCCTCCCTTGCATTACCGGGCATGAGTGGTTTTGT  
TGCAGAATTGATAGTCTTTTTTGGGAATAATTACCAGCCAAAAATTTCTTTTAAATGCCAAAAATACTAATTACTTTTGTAA  
TGGCAATTGGAATGATATTAACCTCCGATTTATTCACTATCTATGTTACGC-----  
CAGATGTTCTATGGTTACAGG-----CTTTTTAATGCCCAAAC---CCCTCT-----  
TTTTTTGATTCTGGTCTCGAGAGTTATTTGTTTCTATTTCTATCCTTTTACCCGTAATAGGTATGGGTATTTTATCCCGA  
TTTTCTTCTCTCATTATCGGTTGACAAGGTTGAATTGATTGTATCTCAATTTTTTTTATAGATAG-----  
ATGATACTG-----  
GAACATGTCCTTGTGTTTGGATTCTTTTTTATTTTCTATTGGTATCTATGGATTGATCACGAGTCGGAATATGATTAGGGC  
TCTTATGTCTCTTGAACCTATGCTGAATGGGGTTAATCTCAATTTTCGTAACATTTTCTGATTTTTTTTGTATAGTCGCCAAC

TAAAAGGTGACATTTTCTCCATTTTTGTTATAGCCATTGCAGCCGCTGAAGCCGCTATTGGACCGGCTATTCTGTCTGTC  
ATTTATCGTAACAAAAAATCAATTCGTATTAATCAATCAAATTTATTGAATAAGTAGATGGAACATATATATCAATATTC  
ATGGATTATGCCGTTCAATCCACTTCCCGTTCCTATGTTAATAGGAGTTGGACTTCTACTTTTTCCAACGACAACAAAAC  
ATCTTCGGCGTATATGGGCCTTCTACTCTTTTTTTGTTAGGTCTAGTTATGCTTCTTTCGGCCTATTTCTTTATTCTT  
CAACTAAATAAAAAGTTATATCTATCAATATGTCTGGTCTTGGACCATCAATAATGATTTTTCTTTAGAGTTTGGTCATTT  
GGTAGATCCACTTACTTCTATCATGTCAATTTTAATTACTACGGTTGGGATTACCGTTCCTATTTATAGTGAGAAATATA  
TGTTTCATGATCAAGGATATTTAAGATTTTTTTCTTATATGACCCTTTTTTCATGTTTCAATGTTGGGATTAGTGACTAGT  
TCCAATTTGATACAAATTTATATTTGTTGGGAATTCGTTGGAATGTTTTCTTACCTATTAATAGGCTTTTGGTTTACACG  
ACCGGTTGCCGCGAATGCCTGTCAAAAAGCATTGTAACTAATCGTGTAGGGGATTTTCAGTTTCTTATTAGGAATTCG  
GTCTTTATTGGATAACGGGAAGTTTTGAATTTAGAGATTTGTTTCGAAATCTTTTATAACTTGGTTTCAT-----AAT---  
AATGAA-----  
ATTCCTTTTTTCTTTTTGACTCTGTGTGCCTTCTTATTATTTGGGGGCGCACTTGCTAAATCCGCGCAATTTCCCCTTCA  
TGTATGGTTACCTGATGCCATGGAAGGACCTACTCCTATTTTCAGCTCTTATCCATGCTGCTACTATGGTAGCCGCAGGAA  
TTTTTCTTGTAGCTCGTCTTCTTCTCTTTTCATAGTTATGCCTTACATACTGAATCTAATATCTTTTCATAGGTATAATC  
ACAGTCTTTTTTAGGAGCTACTTTAGCTCTTTCTCAAAGGATATTTAAAGGGGCTTAGCTTATTCTACAATGTCTCAATT  
GGGTTATATGATGTTAGCTCTAGGCATGGGGTCTTATCGAGCCGCTTTATTTTCATTTGATTACTCACGCTTATTCGAAAG  
CGTTGCTCTTTTTTAGGAGCTGGATCCATAATTCATTCAATGGAAGCTTTTGTGGTTATTCTCCAGAAAAAAGTCAGAAT  
ATGGTTCTTATGGGCGGTTAATAAAAACATATGCCAATTACAAAAACTTCTTTTTTATTAGGTACACTTTCTCTTTGTGG  
TATTCACCTCTTGCTTGTTTTTGGTCCAAAGATTCCATTCTTAATGATAGTTGGTTGTATTACCGATTTTCGCAATAA  
TAGCTTGTTCCTACAGGATTCACTGCATTTTATATGTTTCGGATCTATTTACTTACTTTTGAAGGACACTTAAACGTT  
CATTTTAGAAATTATAGTGAAAAAGAAGTAATTCCTTCTATTCAATATCTTTATGGGGTAACGAAGGACCAAAAAACGCT  
TCAA-----AAAAA-----AAGGGTTTCAAACCTTTATTAACA-----ATGAATAATAAA-----  
AAAGGGGTCACGTTT-----TTTTGTAAGAAA---ATA---GAT---CGA-----ATTGATAGTAGTGTA--  
-AGGAAC-----ATGACG-----CGCCTTTTTACT-----CACTTTGAG---GCT-----  
AGAAT-----ACT---  
CTGCCGTATCCCATGAATCCGACAATACTATGCTATTCCCTATGGTTCTATTGGTTCTATTTACTTTATTTGTTGGAGC  
CATCGGAATT---CCTTC-----  
AATCAAGAGGACAAGAATTTGGATATATTGTCGAAATTCCTAACCCCATCAATA-----  
AACCTTTTACACGAAAAGTCAAATAAT-----TCTGTGGATTGG-----  
TATGAATTTATACCAAATGCAACTTTGTGAGTTAGTCTATC  
*Phalaenopsis*  
CTCATTGTCTTACTCAAACAAGTATGAAACGTATGCTTGCATATTCGTCCATCGGTCAAATCGGATATGTGATTATTGG  
AAGAATTGTTGGAGACTCAAATGATGAATATGCAAGCATGATAACTTATATGTTGTTCTATATCTCCATGAATCTAGGAA  
CTTTTGTGCTTGCATTGTATCATTGGTCTACGTACCGGAAGTATAACATTTCGAGATTATGCAGGATTATACACGAAAGAT  
CCTTTTTTGGCTCTCTTTCAGCCCTATGTCTTATCCCTAGGGGGTCTTCTCCACTGGCAGGTTTTTTTCGGAAAAC  
CTATCTATTCCGGTGTGGATGGCAGGCAGGCCTATATTTCTTGGTTTCGATAGGACTCCTTACGAGCGTTGTTTCTATCT  
ACTATTATCTA--ATATCTAAAAAGAATCAAGTTATTAATGACT-----  
GGGCGAAACCAAGAAATAACCCCTCACGTGCGAAATATAGAAGA-----TCTCCC-----TTA-----  
AGATCAAAAAATTCATCGAATTGAGTATGACTGTATGTGTGATAGCATCTACTATAACCAGGAATATCAATGAACCCAAT  
TCTTGCAATTGCTCAGGATACCCTCTTTTAG-----  
ATGTTTCTGTTTACGAATATGATCTTTTCTGGGCATTTATAATAATATCA-  
TATCAAGCGTTATTCCTATCTTGACATTTGTCAATTTCTGGGATTTTAG-----  
GGAAGGTCCATAAAAGTTTCTTAGTTATGAATCAGGTAGAGAGCCAATGGGGGATGCTTGGGTAAAATTCCGAATTTGCT  
ATTAATGTTTGTCTAGTTTTT-----  
TTTGCTGTTGAAATGATCTTTTATTATCCATGGACAATGAGCTTTGATGTATTGGGCGTATCTGTATTTATATAAGCT--  
TATAAGCTTTTAT-TCCCAATTGTGGGTTTCAGTTTATGCATGTCGAAAAGGAGCGTTGGAATGGTCTTA-----  
-----ACGAGTTATTTT-----  
CCTTGGTTAACAATACTTTTTGGTTTGGACCATATTTGCGGGTCTTCAATTCTCTTTTTTCACT-----  
CATAGGAGAAATAAG-----GTA--  
TAGATGGTATACTCTATATATATGATCCTAGAGTTTCTTCTAATGATCTATTTATTTTGGTTTTATTTTGTATCATT  
CCCAATTAGAGAATCCATTAATCCAATCTAAGACGGATTCTAAATGGATCAAT---  
CTTTTTGATTTTCAATGGAGACTGGAAACCGATGGACTTTCCATAGGACCCTTTTTTACTGACAGGATTTAGAACTACTTT  
A-----  
GTAGCTTGGCCAATTACTAAAAATCCGCGATTTTTATATTTCTTGATGTTAGCAATGTATAGTGGTCAAATAGCATCATA  
TTCTTCTCGAGACTTTTTCTTTTTCTCATCATGTAGGAATTTAAATTAATTCCTTTT--  
TTATTTACTTTTATCCATGTGGGGAGGAAAAAATGTCTATACTCAACTACAAAGTTTATTTTGTGCACTACCGGAGGTT  
CTTTTTTTTTCTTAATAGGAATTCATAGGTATGGGTTTCTTA-----





GGACGAAACCAAGAAATAACCCCTCACATGCGAAATTATAGAAGA-----TACCCT-----TTA-----  
AGATCAAACAATTCCATCGAATTGAGTATGATTCTATGTGTGATAGCATCTACTATAACCAGGAATATCAATGAACCCCAT  
TATTGCAATTGCTCAGGATACCCTCTTTTAG-----  
ATGTTTCTTCTTCACGAATATGATATTTTCTGGACATTTCTAATAATATCA-----  
AGTGTATTTCCTATTTTGGCATTTCCTAATTTCCGGGGTTTTAGCCCCGATTAATGAAGGACCGGAGAACTCTCTAGTTA  
TGAATCGGGTATAGAACCAATGGGGGATGCTTGGGTCCAATTCCGAATTCGGTATTACATGTTTGGCTCTAGTTTTTGTG  
TTTTTGATGTTGAAACGGTCTTTCTTTACCCATGGGCAATGAGTTTCGATGATTGGGTGTATCCGTATTTATAGAAGCT  
TTTATTTTCGTGCTTATCCCAATTGTTGGTTCAGTTTATGCATGGCGAAAAGGAGCGTTGGAATGGTCTTAG-----  
-----ACGAGTAATTTT-----  
CCTTGGTTAACAATAATTGTTGTTTTTCCGATATTCGCAGGTTTATTCATTTTCTTTCTGCCG-----  
CATAGAGGGAATAAA-----  
GTGGTAAGGTGGTATACAATCTCTATATGTTTATTAGAACTCCTTCTAACAACCTATGTTTTTTGTTATCATTTT-----  
-----AAATTGGACGACCCGTTAATTCAATTGGAGGAGAATTATAAATGGATAACC---  
ATTTTCGATTTTCACTGGAAACTGGGAGTTGATGGGCTTTCCATAGGACCCATTTTACTGACAGGATTCATCACTACTTT  
AGCTACCTTAGCGCCTGGCCAGTTACTCGATATTCGCGATTGTTCCATTTCTGATGTTAGCAATGTACAGCGGTCAA  
TAGGCTCATTTTCTTCTCGAGACCTTTTACTTTTTTCTAATGTGGGAGTTAGAATTAATTCCTGTT---  
TACCTCCTTTTATCTATGTGGGGAGGGGAAAAACGCCTTTACTCAGCTACAAAGTTTTATTTTGTATACAGCAGGAGGTT  
CATTTTTCTCTTAATAGGAGTTCTGGGTATGGGCTTATATGGTTCCAATGAACCAACATTAATTTGGAAACATTAGCTA  
ATCAATCATATCCCTAGCATTGGAAATAATATTCTATATTGGCTTCCTTATTGCTTATGCTGTCAAATCACCAATTATA  
CCTCTGCATACATGGTTACCGGATACCCATGGAGAAGCACATTACAGTACATGTATGCTTCTAGCTGGAATCTTATTA  
AATGGGAGCATATGGGCTGATTGCAATCAATATGGAATTATTGCCTCATGCCATTCTATATTTTCTCCTTGGTTGATTC  
TAGTAGGGGCTATTCAAATAATCTATGCAGCTTCAACTTCGCTCGGTCAACGCAATTTAAAAAGGAGAATAGCTTATTCT  
TCTATATCTCACATGGGTTTTACAATTATTGGAATTGGTTCTATAACTGATACGGGACTTAATGGAGCCCTTTTACAAAT  
AATTTCTCATGGATTTATTGGT-----  
GCTGCACTTTTTTCTTGGCAGGAACAAGTTACGATAGAATACGTCTTGTATTCTTGACGAAATGGGGGGAATAGCT--  
-----  
ATCCCAATGCCTAAAATATTTACCATGTTTAGTAGTTTTTCAATGGCTTCTCTTGCCTGCCAGGAATGAGTGGTTTTAT  
TGCAGAGTTGGTAATCTTTTTTGGAAATAATTATCAGCCCTCAATATCTTTTAAATCCCAAAAATAGTAATTACTTTTTGTAG  
TGGCTATTGGAATGATATTAACTCCTATTTTATTCAATTCTATGTTACGG-----  
CAGATGTTCTATGGATACAAG-----CTATTCAACTGCAAAAAG---TCTCAT-----  
TTTTTCGATTCTGGACCACGAGAACTTTTTTATTTCATCTGTATCCTTTTACCTGTAATAGGTATTGGTATTTATCCAGA  
TTTTGTTCTCTCGTTATCAGTCGACAAGGTAGAAACTATTTTATCTAATTACTTTTTAA-----  
ATGATGCTC-----  
GAGCATGTACTTTTTTTGAGTGCCTATTTATTTTCTATCGGTATTTTTTGGATTGATTACAAGTCGAAACATGGTTAGAGC  
ACTTATGTGCCTTGAGCTTATTCTGAATGCAGTTAATCTAAATCTTGTAACATTTTCTCATTATTTGATAGTCGCCAAT  
TAAAGGGCGACATTTTTTCTATTTTTGTTATAACTATTGCAGCCGCTGAAGCAGCTATTGGACTGGCCATTGTTTCATCA  
ATCCATCGTAACAGAAAATCAACTCGTATCAATCAATCCAATTTGTTAAATAAATAGATGGAACGTACATACCCATATGC  
GTGGATCATACTTTTTATTCCACTCCCGGTTACTGTGTTAGTAGGATTAGGACTTCTAGTTGTTCCGAATGCAACAAAA  
AGATTCGCCGTATGTGGGCTTTTTATTAGTGTTTTTATTATTAAGCATAGCTTTACTTTTTTTCGATCAATATATCCATTCAA  
CAAATAGGGGGCAGCTCGATTTATCAATATCTATGGTCTTGGACCATAAATAATGATTTTTCTTTGGAGTTTGGCTACTT  
GATTGATTGCTTACTTCTATTATGTTAATACTAATCACTACTGTTGGAATCATGGTTCTTATTTATAGTGATAATTACA  
TGTCTCATGACCAAGGATATTTGAGATTTTTTGGCGTATCTGAATTTTTTCAATGCTTCCATGCTTGGATTAGTTACTAGT  
TCCAATTTAATACAAATTTATATTTTTTGGGAACCTTGTGGGAATGTGTTTCAATTTACTAATAGGTTTTTGGTTTACACG  
ACCCAGTGCAGCAATGCTTGTCAAAAAGCCTTTGTAACCAATCGTGTAGGGGATTTTGGTTTTATTATTAGGAATCTTAG  
GACTTTATTGGATAACGGGCAGTTTTGAATTTCCGGATTTATTCGAAATTTTCAATATCTTGGTCCAT-----AAT---  
AATACA-----  
ATAAATCTTTTTTTTGCAGCTCTATGTGCCTCTCTATTTTCTTGGTGCAATTGCGAAATCCGCGCAATTCCTCTTTCA  
TGTATGGTTGCCCGATGCAATGGAAGGTCCTACGCCTATCTCCGCTCTTATACATGCTGCGACTATGGTCGAGCGGGGA  
TTTTTCTTGGTCTGACTTTTTCTCTTTTTTATCAACTTACCATACATAATGTATTTTATTTCTTTGATAGGCATAATA  
ACAGTATTATTAGGAGCTACTTTAGCTCTTGGCGAAAGAGACATTAAGAGAAGTTTGGCCTATTCGACAATGTCACAATT  
GGGTTATATTATGCTAGCGATGGGGATAGGTTCTTATCGAGCCGCTTTATTTTCAATTTGATTACTCATGCCTATTCGAAAG  
CATTATTGTTTTTGGGATCCGGATCCATTATTCTATGGAACCCATAGTTGGATATTGCCAGACAAAAGTCAGAAC  
ATGGTTCTTATGGGTGGTTTAAACAAAATATGTGCCAATTACAAAACCCTTTTTTATTAGGTACTTTCTCTTTGTGG  
TATTCCACCTCTTGGTCTTGGTCCAAAGATGAAATTTCTAATGATAGCTGGTTATATTACCAATTTTTTGCATAA  
TAGCTTATTCTACAGCTGGTTTAAACCGCATTTTATATGTTTCGAGTATATTTACTTACTTTTGGATGGACATTTGCGCATT  
CATTTTACAAATTTGAATGGAGCTAAAAGTCGTTCACTCTATTCAATATCTATATGGGGAAAAGAAGAATCAAACCTTGAA  
TAAT-----ACAAAT-----TGTTTT-----TTATCAGAA-----ATCAACAAAAT---

GATGAAAAGGTTTTCTTT-----TTTTCGAAAAAA---ACA---TAT---AAA-----  
ATAGGTAAATATGCG---AGAAAC-----AGAATG-----TTCTCTTTTAGTATT-----  
TTTTTTGGT---AAT-----GAAATA-----GTT---  
TTCCATATCCACATGAATCAGACAGTACCATGTTATTATCAGTATGTGTATTGGGTCTGTTTACTTTGTTTCGTTGGATT  
CATAGGAATC---CCTTTG-----  
AATCAAGGAATCGTTGATTTTTGATATATTATCAAAATGGTTAACTCCATCAATA-----  
AACCTTTTGCATAAAAATGCACATTAT-----TCTGTGGATTGG-----  
TATGAGTTTGTGATAAATGCCATTTTTTTCAGTTAGTATAGC

Platanus

CTCATTGTCTACTCAAACAAGCATGAAACGTATGCTTGCATATTCGTCCATAGGTCAAATCGGATATGTAATTATTGG  
AATAATTGTTGGAGACTCAAATGATGGATATGCAAGCATGATAACTTATATGCTGTTCTATATCTCCATGAATCTAGGAA  
CTTTTGTCTCGCATTGTATCATTGGTCTACGTACCGGAACTGATAACATTTCGAGATTATGCAGGATTATACACGAAAGAT  
CCTTTTTTGGCTCTCTTTTCAGCCCTATGTCTCTTATCCCTAGGAGGTCTTCTCCACTAGCAGGTTTTTTTCGGAAAAC  
CCATCTATTCTGGTGTGGATGGCAGGCAGGCCTATATTTCTTGGTTTTCAATAGGACTCCTTACGAGCGTTGTTTCTATCT  
ACTATTATCTA-----AAAATAATCAAGTTATTAATGACT-----  
GGACGAAACCAAGAAATAACCCCTCACGTGCGAAATTATAGAAGA-----TCTCCT-----TTA-----  
AGATCAAACAATTCCATCGAATTGAGTATGATTGTATGTGTGATAGCATCTACTATAACCAGGAATATCAATGAACCCAAT  
TATTGCAATTGCTCAGGATACCCTTTTTTAG-----  
ATGTTTCTGCTTACGAATATGATATTTTCTGGGCATTTCTGATAATATCA-----  
AGTGTATTCCCTATTTTGGCATTCTAATTTCCGGAGTTTTGGCCCCGATTAGCGAAGGACCAGAGAACTTTCTAGTTA  
TGAATCGGGTATAGAACCAATGGGCGATGCTTGGTTACAATTCCGAATCCGTTATTATATGTTTCGCTCTAGTTTTTTGTTG  
TTTTTGATGTTGAAACGGTTTTTTCTTTATCCATGGGCAATGAGTTTCGATGTGTTGGGTGTACCCGATTTTATAGAAGCT  
TTAATTTTTGTGCTTATCCTAATTGTTGGTTTCAGTTTATGCATGGCGAAAAGGAGCATTGGAATGGTCTTAG-----  
-----ACGAATTTTTTT-----

CCTTGGTTAACAATAATTGTAGTTTTGCCGATATCTGCGGGTCTTTAATTTTTCTTTCTCCCC-----  
CATAGAGGAAATAAG-----  
GCGATTGCTGGTACTATATGTATATGTTTATTAGAACTCCTTCTAATCACTTATGTATTCTGTTATCATTTC-----  
-----CAATTGGACGATCCATTAAATCCAATGAGGAGGATTATAAATGGATAAAT---  
ATTTTTGATTTTTCACTGGAGATTAGGAATCGATGGACTTTCCATAGGACCCATTTTATTGACGGGGTTCATCACTACTTT  
AGCTACTCTAGCGGCTTGGCCAATTACTCGAGATTCCCGATTGTTCCATTTCTGATGTTAGCAATGTACAGTGGTCAA  
TAGGATCATTCTTCTAGAGACCTTTTACTTTTTTTTATTATGTTGGGAGTTAGAATTAATCCCGTT---  
TACCTACTTCTATCCATGTGGGGAGGGAAGAAACGTCTGTATTTCGGCTACAAAGTTTTATTTTGTACACTGCAGGAGGTT  
TATTTTTCTCTAATGGGAGTTCTGGGTATGGGTTTATATGGTTCCAATGAACCAACATTAAATTTTTGAAACATCAGCCA  
ACCAATCATATCCCGTGGCATTGGAAATAATGTTCTATTTTGGATTTCTTATTGCTTATGCTGTCAAATCACCGATTATA  
CCCCTACATACATGGTTACCAGATACCCACGGAGAAGCACATTACAGTACATGTATGCTTCTAGCCGGAATTTTATTAAA  
AATGGGAGCATATGGATTGGTTTCAATCAATATGGAATTATTACCCCATGCTCATTCTATATTTTCCCCCTGGTTGATGA  
TAGTAGGCACAATTCAAATAATCTATGCAGCTTCAACATCTCCCGGTCAACGCAATTTAAAAAAGAGAATAGCCTATTCC  
TCTGTATCTCATATGGGTTTACAATTATAGGAATTGGTTCTATAACGGATGCGGGACTCAATGGAGCCGTTTTACAAT  
AATCTCTCATGGATTTATCGGT-----  
GCTGCACTTTTTTTCTTGGCAGGAACGAGTTACGATAGAATACGTCTTGTATTCTCGACGAAATGGGAGGAATAGCT--  
-----

ATCTCAATGCCAAAAATATTTACGATGTTTCAGTAGCTTCTCGATGGCTTCTCTTGCATTGCCGGGAATGAGTGGTTTTGT  
TGCAGAATTGATAGTATTTTTTGGAAATAATTACCAGTCCAAAATATTTTTTAATGCCAAAAATACTAATTACTTTTTGTAA  
TGGCAATTGGAATGATATTAATCCTATTTATTCAATTATCTATGTCACGC-----  
CAGATGTTCTATGGCTACAAA-----CTATTCAATGCTCCAAAC---TCTTAT-----  
TTTTTTGATTCTGGACCACGAGAATAATTTGTTTCGATCTCTATCTTTCTACCCGTAATAGGTATTGGTATTTATCCGGA  
TTTTGTTCTCTCACTATCAGTTGACAAGGTGCAAGCTATTCTATCTAATTACTTTTTATAAATAG-----  
ATGATACT-----  
GAACATGTACTTGTGTTTTGAGTGCTTATTTATTTTCTATCGGTATCTATGGATTGATCACGAGCCGAAATATGGTTAGAGC  
GCTTATGTGCTTGAACCTATACTGAATGCGGTTAATAAATTTTCGTAACATTCTCTGATTTTTTTGATAGTCGCCAAT  
TAAGAGGAGACATTTTCTCGATTTTTGTTATAGCTATTGCAGCAGCTGAAGCAGCTATTGGACCAGCTATTCTTTTCGTCA  
ATTTTTCGTAACAGAAAGTCAACTCGTATCAATCAATCGAATTTGTTGAATAAATAGATGGAACATACATATCAATATGC  
ATGGATCATACTTTCTTCCACTTCCAGTTCCTATGTTAATAGGAGTGGGACTTCTCCTTGTTCGAGGGCAACAAAA  
ATCTTCGCCGATGTGGGCCTTTCTAGTGTATTTATTGCTAAGTATAGTTATGATTTTTTTCAGCCGATCTGTCTATTCCAG  
CAACTAAACGGCAGTTTCGATCTATCAATATGTATGGTCTTGGACCATCAATAATGATTTTTCTTAGAGTTCGGTTACTT  
GATCGATCCACTTACTTCTATTATGTCAATATTAATCACTACTGTTGGAATAATGGTTCTTGTGTTTATAGTGACAATTATA  
TGTCCCATGATCAAGGATATTTGAGATTTTTTGCTTATATGAGTTTTTCCAATACTTCCATGTTGGGATTAGTTACTAGC

TCCAATTTGATACAAATTTATATTTTTTGGGAATTGGTTGGAATGTGTTTCGTATCTTTTAATAGGTTTTTGGTTCCACACG  
ACCAATTGCGGCAAATGCTTGTCAAAAAGCGTTTGTAACTAATCGTGTAGGGGATTTTTGGTTTTATTATTAGGAATCTTAG  
GGCTTTATTGGATAACGGGTAGTTTTGAATTTCCGGATTTGTTTCGAAATATTCAATAACTTGATTTAT-----AAT---  
AATAGG-----  
GTCAATTCCTTTATTTGTCACTTTGTGTGCCTCCCTCTTATTCGTTCGGTGCAGTTGCTAAATCTGCGCAATTCCTCCCTTCA  
TATATGGTTACCCGATGCCATGGAGGGTCCCTACTCCTATTTTCGGCTCTTATACATGCTGCTACTATGGTAGCAGCGGGAA  
TTTTTCTTGTAGCTCGGCTTTTTCTCTTTTTACAGTTATACCTTATATAATGAATCTAATTTCTTTGATAGGTATAATA  
ACAGTACTATTAGGAGCTACTTTGGCTCTTGCTCAAAAAGACATTAAGAGAAGTTTAGCCTATTCTACAATGTCTCAATT  
GGGTATACTATGTTAGCTCTAGGTATGGGATCTTATCGAGCTGCTTTATTTTCATTTGATCACCCATGCCTATTCGAAAG  
CATTATTGTTTTTAGGGTCTGGATCAATTTATTCATTCATGGAACCGTTGTTGGATATTCTCCAGAGAAAAGTCAGAAC  
ATGGCTCTTATGGGTGGTTTTAACAAAATATGCGCCAATTACAAAACCGCTTTTTTTATTAGGTACACTCTCTCTTTGTGG  
TATTCCACTCTTGGCTTGTTTTTGGTCTAAAGACGAAATTTCTAATGATAGTTGGTTGTATTCCAGATTTTCGCAATAA  
TAGCTTGTTCACAGCAGGATTAAGTGCATTTTTATATGTTTTCGGATGTATTTACTTACTTTTTGAAGGACATTTAAACGTC  
CATTTTTCAAATACAGCGGCAAAAAAATAGCTCGTTCTATTCAATATCTATATGGGGTAAAAAAGAAACGAAAATCTAT  
TAATATTAGAAAATAT-----TTTTGT-----TTATCAACTTTATCAACAATGAATGATAAT-----  
GAAAAGGATTCTTAT-----TTTTGAAGAAG---GGA---TAT---CCG-----ATTCATGGGAATGTA--  
-AGAAGC-----ATGGCG-----CGACCCCTTATTACTATTAGT-----CATTTTGGC---AAT-----  
AAAGAA-----ACT---  
TTCCCATATCCCATGAATCGGATAATACTATGCTATTGCCTCTGCTTGTATTGGTCCCTATTTACTTTGTTTCGTCCGATT  
CATAGGAATC---CCCTC-----  
GATCAAGAAGGAATGGATTTGGATATATTATCCAAATGGTTAGCTCCGTCAATA-----  
AACCTTTTACATCCCAATTTGAGCAAT-----TCTGTAGATTGG-----  
TATGAGTTTATCACAATGCAATTTTTTTCAGTCAAGTATAGC

Populus

CTCATTGCTATTACTCAAACAAGCATGAAACGTATGCTTGCATATTCGTCCATAGGTCAAATTGGATATGTAATTATTGG  
AATAATTGTTGGAGACTCAAATGGTGGATATGCAAGCATGATAACTTATATGCTCTTCTATATCTCCATGAATCTAGGAA  
CTTTTGTCTGCATTGTATTATTTGGTCTACGCACCGGAACGATAACATTTCGAGATTATGCAGGATTATACACGAAAGAT  
CCTTTTTTGGCTCTCTCTTTAGCCCTATGTCTCTTATCCCTAGGAGGTTCTTCCCTCCACTAGCAGGTTTTTTTCGGAAAAC  
CTTTTATTCTGGTGTGGATGGCAGGCAGCCCTATTTCTTGGTTTTCAATAGGACTCCTTACGAGCGTTCTTTCTATCT  
ACTATTATCTA-----AAAATAATCAAGTTATTAATGACT-----  
GGACAAAACCAAGAAATAACCCCTCACGTGCGAAATTATAGAGGA-----TCCCCT-----TTA-----  
AGATCAAACAATTCATCGAATTGAGTATGATTGTATGTGTGATAGCATCTACTATACCGGGAATATCAATGAGCCCGAT  
TATTGAAATTGCTCAAGATACCCTTTTTTAG-----  
ATGTTTCTGCTTTACGAATATGATATTTTCTGGGCATTTCTAATAATATCA-----  
AGTGTATTCTATTTTGGCATTCTAATTTTCGGGCCTTTTATCCCAATTAGAAAAGGACCAGAGAAACTTTCTAGTTA  
TGAATCCGGTATCGAACCAATGGGCGATGCTTGGTTACAATTTAGAATCCGTTATTATATGTTTGTCTAGTTTTTGTG  
TTTTTGATGTTGAAACGGTTTTTCTTTATCCATGGGCAATGAGTTTCGATGTATTGGGGGTATCCGTATTTATAGAAGCT  
TTAATTTTCGTGCTTATCCTAATTGTTGGTTAGTTTATGCATGGCGAAAAGGAGCATTAGAATGGTCTTAG-----  
-----ACGAATTCCTTT-----  
CCTTGGTTAACAATATTTGTAGGTTTACCAATATCCGCGGGTTTCTTGATTTTCGTTTTCCCT-----  
CATAGAGGAAATAAG-----  
GTAATTAGGTGGTATACTATATTTATATGTGTACTAGAACTCCTTTTAATGACCTATGCATTCTCTTATTATTTT-----  
-----CAATTGGACGATCCCTTAATCCAATTGACGGAGTCTTATAAATGGATTAAT---  
TTTTTTGATTTTTACTGGAGATTAGGAATAGATGGACTTTCTCTAGGACCTATTTTACTGACCGGATTTATCACCCTTT  
AGCTACTTTAGCGGCTCGGCCAATTAAGTGGGATTTCCCGATTATTTTCATTTTTTGTATGTTAGCAATGTATAGTGGTCAA  
TAGGATATTTTTCTCTCAAATCTTTTACTTTTTTTCATTTATGTGGGAGTTAGAATTAATTCCTGTT---  
TATCTACTTCTAGCCATGTGGGGGGGAAAGCAACGCTGTATTTCAGCTACAAAATTTATTTTGTATACTGCAGGAAGTTC  
TGTTTTTTTTTATAATGGGGGCCTTAGGTATCGCTTTCTATGCTTCCAATGAACCAACATTCAATTTTGAACATCAGCTA  
ATCAATCATATCCTGTGACCTTGGAAATACTATTCTATATTGGATTTCTTATTGCTTTTGTCTCAAATCACCGATTATA  
CCCTTACATACATGGTTACCAGACACCCATGGAGAAGCACATTACAGTACTTGTATGCTTTTAGCTGGAATCTTATTAAA  
AATGGGAGCATATGGATTGGTTTCGAATAAATATGGAATTATTATCCCACGCCCTTCTATATTTTCTTCTTGGTTGATAA  
TAGTAGGCGCAATACAAATAATCTATGCAGCTTCAACATCTTCTGGTCAAAAAAATTTAAAAAAGAATAGCCTATTCT  
TCTGTATCTCATATGGGTTTTACAATTATAGGAATTTACTCTATAAGCGATATGGGACTCAACGGGGCCATTTTACAAT  
AATATCTCATGGATTTATCGGC-----  
GCTGCGCTTTTTTCTTGTGAGGAACAAGTTATGATAGAATACGTCTTGTATTCTTTGACGAAATGGGCGGAATGGCT--  
-----  
ACCCTAATGCCAAAATATTTCATGATGTTTCAGTATCTTATCATTAGCTTCTCTTGCATTACCGGGCATGAGCGGTTTTTT



TGCGGAATTGGTAGTATTTTTTGAATAAATTACCGCCAAAAAATTTTTTTAATGCCAAAAATACTAATTACTTTTTGTAA  
CGGCAGTTGGAACGATATTGACTCCTATTTATTTATTATCTATGTTACGC-----  
CAGATGTTCTATGGATAACAAG-----CTGTTTAAATGCCACAAAT---TCTTAT-----  
TTTTTTGATTCTGGACCACGAGAATTTTTGTTTCGATTGCTATCCTTCTGCCTGTAATCAGTATTGGTATTTATCCGGA  
TTTTCGTTTTCTCATTATCAGTTGACAAGGTCGAAGCTATTCTATCTAATTATTTTTTATAGCTAA-----  
ATGATGCTC-----  
GAATATGTGCTTGGTTTGGAGTGCTTATTTATTTTCTATCGGTATCTATGGATTGATCACGAGTCGAAATATGGTTAGAGC  
CCTTATGTGTCTTGAACCTTATATTGAATGCCGTCAATCTAAATTTTCGTAACATTTTCTGATTTTTTGTATAGTCGACAAT  
TAAAAGGAAATATTTTATCAATTTTTGTTATATCTATCGCAGCCGCTGAAGCAGCTATCGGGCCGGCTATAGTTTCGTCA  
ATTTATCGTAACAGAAAATCAATCCGTATCAATCAATGAATTTGTTGAATAAGTAGATGGAACATACATATCAATATTT  
ATGGATTATATCTTTTCGTTACACTTCCAGTCCCTATGTTAATAGGAATGGGACTCCTACTTTTTCCGGTGTCAACAAAA  
AGCTTCACCGTATATGGGCTTTTCCAGTGTTTTATTGTTAAGTATAGTTATGGTTTTTTTCGACTGATCTGTTTTATT  
CAATAAAATAGCAGTTCCATTTATCAATATGTATGGTCTTGGACCATCAACAATGATTTTTTCTTAGAGTTCCGGCAGCTT  
GATTGACCCACTTACTTCTATTTTGTTAATAATTAATACTACGGTTGGAATTTTGGTTCTTGTATAGTGACAGTTATA  
TGTCTCATGATCAAGGCTATTTGAGATTTTTTGTATATGAGTTTTTCAACTTCAATGCTGGGATTAGTTACCAGT  
TCGAATTTAATCCAAATTTATATCTTTTGGGAATTGGTTGGAATGTGCTCTTACCTATTAATAGGTTTTTGGTTCACACG  
ACCTATTGTGTCCAATGCTTGTCAAAAAGCATTTCGTAACCTAATCGTGTAGGCGATTTTGGTTTATTATTAGGAATTTT  
GTCTTTATTGGATAACAGGCAGTTTCGAATTTCCAGGATTTGTTTGAATATTTCAATAACTTGATTTAT-----AAT---  
AATGATAATGAGGTTCATTTTTATTTTGTACCTTGTGCGCTTTTCTATTATTTTCCGGTGCAATTGCTAAATCGGCGCA  
ATTTCCCTTTCATGTGTGGTTACCGGATGCCATGGAAGGACCTACCCCTATTTCCGGCTCAATACATGCTGCTACCATGG  
TAGCAGCGGGAATTTTTCTTGTAGCTCGACTTCTTCTCTTTTCGTAGTTATACCTTACATAATGAAGCTAATAGCTTTG  
ATAGGTATAATAACAGTACTATTAGGAGCTACTTTAGCTTTTGTCTCAAAAAGATATTAAGAGAGGTTTAGCTTATTCTAC  
AATGTCTCAATTGGGTTATACGATGTTAGCTTTAGGTATGGGCTCCTATCGAGCCGCTTTATTTTCAATTTGATTACTCATG  
CTTATTTCGAAAGCATTGTTGTTTTTAGGATCTGGATCCATTATTCATTCAATGGAAGGTATTGTTGGCTATTCTCCGGAT  
AAGAGTCAAAATATGGTTCTTATGGGTGGTTTAAACAAAACATGTTCCAATTACAAAATTGCTTTTTTATTAGGAACCTT  
TTCTCTTTGTGGTATTCCACCTCTCGCCTGTTTTTGGTCCAAAGATGAAATTTCTTAATGATAGTTGGTCGTATTACCTA  
TTTTCGCAATAATAGCTTTTTCCACAGCAGGATTAACCTGCATTTTATATGTTTCCGGTTTTATTACTTACTTTTGAAGGG  
CATTAAATATTTATTTTCAAAATTTATAGTGGTAAAAAAAACAGCGCATTTCTATTCAATATCTTTATGGGGTAAACAGGG  
ATCAAAAATCTTAAAA-----AAAAA-----ATGCGTTTATTACCTTTATTAACAATAAATAAATAATAAT-  
-----GAAAGAGCTTCTTTT---TTTTGTTTTTTTTTGGGAAGAAA---ATA---TAT---CAA-----  
ACTGGTGGTACTGTA---AGAAAG-----ATGACG-----TGTCCTTTTATTACTATTAAT-----  
CATTTTGGT---ACT-----AAAAGA-----ATT---  
TTTTCTATCCCCAGGAATCGGATAATACTATATTATTTCCGATGCTTGTTTTGGTACTATTTACCTTGTTTATTGGAGC  
TATAGGAATA---CCTTTCAATCAATTC-----  
AATAAAGAAGAAATGAATTTGGATATATTATCCAAACTGTTAATTCGGTCTTTA-----  
AGTCTTTTACATCAAAATCAAAATGAG-----TCTGTAGATTGG-----  
TATGAATTTGTAACAAATTCAACTTTTTTCAGTTAGTATAGC

Ranunculus

CTCATTGCTATTACTCAAACAAGCATGAAACGTATGCTTGCATATTTTCGTCCATAGGTCAAATCGGATATGTAATTATTGG  
AATAATTGTTGGAGACTCAAATGATGGATATGCAAGCATGATAACTTATATGCTGTTCTATATCTCCATGAATCTAGGAA  
CTTTTGTTCGATTGTATCATTGGTCTACGTACCGGAACCTGATAACATTCGAGATTATGCAGGATTATACACGAAAGAC  
CCTTTTTTGGCTCTCTCTTTAGCCCTATGTCTTATCCCTAGGAGGACTTCTCCACTAGCAGGTTTTTTTCGGAAAACCT  
CCATCTATTCTGGTGTGGATGGCAGGCAGGCCTATATTTCTTGGTTTTCAATAGGACTCCTTACGAGCGTTGTTTCTATCT  
ACTATTATCTA-----AAAATAATCAAGTTATTAATGACT-----  
GGACGAAACCAAGAAATAAACCCTCACGTGCGAAATATAGAAGA-----TCTCCT-----TTA-----  
AGATCAAACAATTCATCGAATTGAGTATGATTGTATGTGTGATAGCATCTACTATAACCGGGAATTTCAATGAACCCAAT  
TATTGCAATTGCTCAGGATACCTTTTTTTAG-----  
ATGTTTTTGGCTTACGAATATGATATTTTCTGGGCATTTCTAATAATATCA-----  
AGTGTATTCTTATTTTAGCATTCTAATTTCCGGAGTTTTGGCCCAATTAATGAAGGGCCCCGAGAACTTTCTAGTTA  
TGAATCGGGTATAGAACCAATGGGCGATGCTTGGTTACAATCCGAATCCGTTATTATATGTTTGCCTCGTTTTTGTG  
TTTTGATGTTGAAACCGTTTTTTCTTTATCCATGGGCAATGAGTTTCGACGTATTGGGTGTATCCGTATTTGTAGAAGCT  
TTAATTTTTCGTGCTTATCTAATTTGTTGGTCTAGTTTATGCATGGCGAAAAGGAGCGTTGGAATGGTCTTAG-----  
-----ACGAATGATTTT-----  
CCTTGGTTAACAATAATTGTTGGTTTGGCGATATTCGCGGGTACTTTGATTTTCTTTTTTCT-----  
CATAGAGGAAATAAG-----  
ATTATTAGGTGGTATACTATATGTATATGCATTTCTGAATTACTTATAACAGCCTATGTATTCTGTTATCATTTT-----  
-----CAATTAGACGATCCATTAATCCAATTAGAGCAGGATTATAAGTGGATTTCAT---

TTTTTTGATTTTCACTGGCGACTAGGAATTGATGGACTTTCCGTAGGACCTATTTTACTTACAGGATTTATAACTACTTT  
AGCTACTTTTAGCGGCTTGGCCAGTTACGCGGGATTTCGCGATTGTTCCATTTCCCTTATGTTAGCAATGTACAGTGGGCAA  
TAGGATTATTTTCTTCTCGGGATCTTTTACTTTTTTTTTATAATGTGGGAGTTTGAATTAATTCCTGTC---  
TACCTACTTTTTATCTATGTGGGGAGGTAAGAAACGTTTGTATTTCAGCTACAAAGTTTATTTTGTACACTGCCGGTGGTTC  
TATTTTTCTTTAATGGGAGTTCTTGGTATGGGTTTATATGGTTCCAATGAACCAACATTAAATTTTGAAACATCAGCCA  
ATCAACCGTATCCTGTGGCATTAGAAATACTATTTTATTTTGGATTTCTTATTGGTTATGCTGTCAAATGGCCGATTATA  
CCCCTACATACATGGTTACCAGATACCCACGGAGAAGCACATTACAGTACATGTATGCTTTTAGCCGGAATTTTATTTAA  
AATGGGAGCATATGGATTGGTTCCGGATCAATATGGAATTATTACCCCATGCTCATTCTATATTTTCTCCCTGGTTGATA  
TAGTAGGTGCAATTCAAATAATCTATGCAGCTTCAACATCTCTTGGTCAGCGCAATTTAAAAAAAAGAATTGCCTATTCC  
TCTGTATCTCATATGGGTTTATAATTATAGGAATTTGTTCCATAACAGATACAGGACTTAATGGAGCCATTTTACAAAT  
GATCTCTCATGGATTTTATTGGT-----  
GCTGCACTTTTTTCTTGGCAGGAACGAGTTACGATAGAATACGTCTTGTATTCTTGACGAAATGGGAGGAATTGCT--  
-----

ATTCCAATGCCAAAAATATTTACAATGTTTCAGTAGCTTCTCGATGGCTTCTCTTGCCCTGCCTGGAATGAGTGGTTTTGC  
TGCAGAATTGGTGGTCTTTTTTGGACTAATTACAAGCCAAAAATATTTATTAATGCCAAAAATACTAATTACTTTTTGTAA  
CGGCAATTGGAATGATATTAACTCCTATTTATTTCATTATCTATGTTACGT-----  
CAAATGTTTTATGGATACAAG-----CAATTTAAATTTAAGTCT---  
CTTAATTCCTCGTTTTTTGATTCTGGGCCACGAGAACTTTTTGTTTCAATCTGTATTTTTTTACCCGTTATAGGTATCGG  
TATTTATCCGGATTTCTGTTCTCTCACTATCAGTTGACAAGGTAGAAGCTATTCTATCTAATTACTTTTATAGATAA----  
-----ATGATGCTC-----

GAACATGTACTTGTTTTTGAGTTTCTATTTATTATCCATTGGTATCTACGGATTGATTACAAGTCGAAATATGGTTCGAGC  
GCTTATGTGCTTGGAGCTTATACTGAATGCAGTTAACATAAAATTTTCGTAACATTTTCTGATTTATTTGATAATCGTCAAT  
TAAAAGGAGACATTTTCTCAATTTTTGTTATAGGAATTGCAGCTGCCGAAGCAGCTATTGGATTAGCTATTATTTTCAGCA  
ATTCATCGTAACAGAAAATCAACTCGTATCAATCAATCTAATTTGTTGAATAAATAGATGGAGCATATATATCAAGATGC  
ATGGATCATACTTTTATTCCCCTTCCAATTCCTATAGCAATAGGGCTGGGTCTTCTCCTTTTCCCGACGACCACAAAA  
GGATTCGTGGATATGGGCCTTTTTTAGTGTATTTATTATTAAGTATCATAATGATTTTTTCTGTAATCCTTTCTATTAAG  
CAAATTGATGGTAATCCTATCTACCAATATGTATGGTCTTGGACCATCAATAATGATTTTTCTTTAGATTTTGGTAACCT  
TATAGATCCGCTTACCTCCATTATGTTAATATTAATACGACTGTTGGAATAATGGTTCCTATTTATAGTGCACAATA  
TGTCTCATGATCAAGTTTATTTGAGATTTTTGCTTATATGAGTTTTTTTTAATGCTTCCATGCTGGGATTAGTTACAAGT  
TCAAATTTGATACAAATTTATATTTTTTGGGAATTAGTTGGAATGTGTTTCATACCTATTAATAGGTTTTTGGTTTCACACG  
ACCTCTTGACGCAAAATGCTTGTCAAAAAGCCTTTGTAACATAATCGGGTAGGGGATTTTAGTTTTATTTTTAGGAATCTTAG  
GTCTTTATTGGATAACAGGCAGTTTTGAATTTAGGGATTTTTTTGAAATAGCAAAGAATTTAATTGAT-----AAT---  
AATGGG-----

TACAATCTTTCTTTCTTACTTTGTGTACTTCCCTATTATTTGTTGGTGCGGTTGCTAAATCTGCACAATTCCTCTTTCA  
TGTATGGTTACCCGATGCTATGGAAGGCCCAACTCCTATTTTCGGCTCTTATACATGCTGCTACTATGGTGGCAGCAGGTA  
TTTTCTTTGTAGCTCGACTTTTTCTCTTTTTTACAGTTATACCTTACATAATGAATATTATTGCGTTGGTTGGTATAATA  
ACGCTACTATTAGGAGCTACTTTAGCCCTTGCTCAAAGAGACATTTAAAAGAAGTTTAGCCTATTCTACAATGTCTCAATT  
AGGTTATATTATGTTAGCTTTAGGTATGGGATCTTACCGAGCTGCTTTATTTTCATTTGATTACTCATGCTTATTCGAAAG  
CATTATTATTTTTAGGATCTGGGTCCATTATTCATTCAATGGAAAACGTTGTTGGATATTCCCAGATAAAAAGCCAGAAC  
ATGGCTCTTATGGGTGGTTAACAAAATATGCGCCAATTACAAAACCTTCATTTTTATTAGGTACACTTTCTCTTTGTGG  
TATTCACCTCTTGCTTGTTTTTGGTCCAAAGATGAAATTTCTTAATGATAGTTGGTTATATTCACCGATATTTGCAACAA  
TAGCTTGTTTGACAGCAGGATTAAGTGCATTTTATATGTTTCGAATGTATTTACTTACTTTTGGAGGGCATTAAATATT  
AATTGTAAAAATTATAGTGCCAAAAAATAATGGATTATATTCAATATCCATATGGGGCAAATGGGGTCAAAAAGTGAT  
ACAA-----ATAAT-----TATTTT-----GTATCAACA-----ATGAATAATTAT-----  
GAAAAGATTACTTTA-----AAA---GCA---AAG---CAA-----

ATTGATGATAATGGAATAAGCAAT-----ATGATG-----CGACCTTTTATTACTATAAAT---  
AAAATTTTTGAT---AAT-----ACAAAA-----ACT---  
TTCACGTATCCTTATGAATCCGACAATACTATGTTATTTCCACTTTTTGTATTGGTTATATTTACTTTTTTTATTGGATA  
CATAGGAATTCCTCTTTT-----  
GATCAAGGGAGAATTCATTTTTGATATATTATCAAAATGGTTAATTCCTCGATA-----  
AATTTTTTACATTCAGACTTTAACAAT-----TCTTTTGGATTGG-----  
TATGAGTTTCTGATAAATGCCCTTTTTTTCAGTTAGTATAGC

Spinacia

CTCATTGCTATTACTCAAACAAGCATGAAACGTATGCTTGCATATTCGTCCATAGGTCAAATCGGATATGTAATTATTGG  
AATAATTGTTGGAGACTCAAATGATGGATATGCAAGCATGATAACTTATATGCTGTTCTATATCTCCATGAATCTAGGAA  
CTTTTGTCTGCATTGTATTTTGGTCTACGTACCGGAAGTATAACATTTCAGATTATGCAGGATTATACACGAAAGAT  
CCTTTTTTGGCTCTCTTTTAGCCCTATGCCTCTTATCCCTGGGGGTCTTCTCCACTAGCAGGTTTTTTTCGGAAAAAT

CTATTTATTCTGGTGTGGATGGCAGGCAGGCCTATATTTCTTGGTTTTAATAGGACTCCTTACGAGCGTTCTTTCTATCT  
ACTATTATCTA-----AAAATAATCAAGTTATTAATGACT-----  
GGACGAAACCAAGAAATAACCCCTCACGTGCGAAATTATAGAAGA-----TCCCCT-----TTA-----  
AGATCAAAGAATCCATCGAATTCAGTATGATTGTATGTGTGATAGCATCTACTATAACCAGGAATATCAATGAACCCGAT  
TATTACAATTGCTCAGGATACCCTTTTTTAG-----  
ATGTTTCTACTTTATGAATATGATATTTTCTGGGCATTTTTAATAATATCA-----  
AGTGTATTCCCTATTTTAGCATTTCTATTTTCCGGAATTTTAGCACCGATTAGCAAAGGACCCGAGAACTTTCTAGTTA  
CGAATCGGGTATAGAACCTATGGGGGATGCTTGGTTACAATTTCGAATCCGTTATTATATGTTTGCTCTAGTTTTTTGTTG  
TTTTTGATGTTGAAACGGTTTTTCTTTATCCATGGGCAATGAGTTTCGATATATTGGGTGTATCCGTATTTATAGAAGCT  
TTAATTTTCGTGCTTATCCTAATTGTTGGTTTAGTTTATGCATGGCGAAAAGGAGCATTGGAATGGTCTTAA-----  
-----  
-----ATGATAGAGCTCCTTCTAATGACCTATGTGTTTTTTTTATCATTTT-----  
CAACCGGATGATCCATTAATCCAACCTGGTTGAAGATTATAAATGGATCAAC---  
TTTTTTGATTTCCATTGGAGATTAGGAATCGATGGACTTTTCGATAGGACCCATTTTACTAACGGGATTTCATCACTACTTT  
AGCTACTCTAGCGGCTTGGCCTGTTACTCGAAATTCGCAATTATTTTCTTTGATGTTAGCGATGTATAGTGCTCAA  
TAGGATTATTTTCGTCCCGAGATCTTTTACTTTTTTTCATAATGTGGGAATTAGAATTAATTCCTGTT---  
TATCTACTTTTATCCATGTGGGGGGAAAGAAACGTCTCTACTCCGCTACTAAATTTATTTTGTATACTGCGGGGGGTTT  
TATTTTTCTATTAATGGGAGTTCTAGGTGTTGGTTTATATGGTTCCAATGAACCAACATTAATTTAGAAACATTAGTTA  
ATCAATCGTATCCTGTGGCATTAGAAATAATATTCTATATTGGATTTTTTATTGCTTTTGCTGTCAAATTACCGATTATA  
CCCTTACATACATGGTTACCAGATACCCACGGAGAAGCGCATTACAGTACTTGTATGCTGCTAGCCGGAATTTTATTAAA  
AATGGGAGCATATGGATTGGTTCCGATCAATATGGAATTATTACCTCATGCTCATTGATATTTTCTCCTTGGTTGATGA  
TAATAGGCACAATGCAAATAATCTATGCAGCTTCAACATCTCCCGGGCAACGTAATTTAAAAAAAAGAATAGCCTATTCC  
TCCGTATCTCACATGGGTTTTCATAATTATAGGAATTAGTTCTATAACCGATACGGGCCTTAATGGGGCCATTTTACAAT  
AATTTCTCATGGATTTATTGGT-----  
GCTGCACTTTTTTTCTTAGCGGAACTAGTTACGATAGAATACGCCTTGTATTCTCGACGAAATGGGCGGAATCGCG--  
-----  
ATTCCAATGCCAAAAATATTCACACTCTTCAGTAGCTTTTCAATGGCATCTCTTGCAATTACCCGGCATGAGTGGTTTTCAT  
TGCCGAATTAATAGTATTTTTTGGACTAATTACTAGCCAAAAATATCTTTTAATACCAAAACTACTAATTACTTTTTGGAA  
TGGCAATTGGAATGATATTAACTCCTATTTATTTATTATCTATGTCACGT-----  
CAAATGTTCTATGGATATAAA-----TTATTTAACATTTCAAAC---TCTTCT-----  
TTTTTTGATTCTGGTCCGCGAGAGTTGTTTGGTTCAACTTCTATCTTTTTACCAGTAATAGGTATTGGGGTTTTACCCGGA  
TTTAGTTCTCTCACTATCAGTTGAGAAAGTGGAAGCTATTTTATCCAATTATTTTTATAGATAG-----  
ATGATACTC-----  
GAGCATGTACTTGTTTTTGAGTGTCTTTTTTATTTTCTATCGGGATTTATGGATTAGTCACGAGTCGAAATTTAGTTCGCGC  
TCTTATGTGCCTTGAACCTATATTGAATGCAGTTAATCTAAACTTTGTAACATTTTCTGATTTTTTTGATAGTCGCCAAT  
TAAAGGGAAACATTTTCTCCATTTTTGTTATAGCCATTGCAGCCGCTGAAGCAGCTATTGGACCGGCTATTGTTTCTTCA  
ATTTATCGTAACAGAAAATCCATTCGTATCAATCAATCGAATTTATTGAATAAATAGATGGAACATATATACCAATATGC  
ATGGATCATACTTTCTTCCACTTCCGGTCCCTTGTTAATAGGAGCTGGACTTTTTTTTTTCCGACGGCAACAAAA  
ATCTTCCGGCGTATATGGGCTTTTTCTAGTATTTTCGTTGTTAAGTATAGTTATGATTTTTTTCGATGAAGCTGGCTATTCAA  
CAAATAAATAGTAATTTCTATTTATCAATATCTATGGTCTTGGACCATTAATAATGACTTTTTCTTTAGAATTTGGCTACTT  
GATGGACCCACTTACTTCTATTATGTCAATGTTAATTACTACTGTTGCAATTCTGGTTCTTATTTATAGTGATAATTATA  
TGTCTCATGATCAAGGATATTTGAGATTTTTTGGCGTATATGAGTTTTTCAATACTTCCATGTTGGGATTAGTTACTAGT  
TCTAATTTGATACAAATTTATATTTTTTGGGAATTAGTGGGAATGTGTTCCATCTATTAATAGGTTTTTGGTTTTACACG  
ACCTATTGCCGCAAATGCTTGTCAAAAAGCGTTTGTGACTAATCGTGTAGGAGATTTGGCTTATTATTAGGAATTTAG  
GTCTTTATTGGATAACAGGTAGTTTCGAGTTTCGGGATTTGTTTGAATATTTCAATAATTTAATTAAG-----AAT---  
AACGAG-----  
GTCAATTCCTTATTTTGTATTTTTATGTGCTTTCTTGTATTGTGCCGGTGCAGTTGCTAAATCAGCTCAATTTCCCCTTCA  
TGTATGGTTACCTGATGCTATGGAGGGCCTACTCCTATTTTCAGCTCTCATCCATGCTGCTACCATGGTAGCGGCGGGGA  
TTTTTCTAGTTGCTCGACTCCTGCCCTTTTTGTAGTTATACCTTACATAATGTATGTAATATCTTTTATAGGTATAATA  
ACAGTACTATTAGGAGCGACCTTAGCTCTTGGCTCAAAAAGACATTAAGAGGAGTTTAGCTTATTATACAATGTCTCAATT  
GGGTTATATGATGTTAGCTCTAGGTATGGGTTCTTATCGAACGGCTTTATTTTCAATTAATTACTCATGCTTATTCAAAG  
CATTATTGTTTTTAGCATCTGGATCTCTTATTCATTCAATGGGAATATTGTTGGATATTCTCCGGATAAAAAGTCAGAAT  
ATGGTTCTTATGGGGGGTTAACAAAACATGTACCAATTACAAAACCTTCTTTTTAATAGGTACACTTCTCTTTGTGG  
TATTCCGCTCTTGTGTTGTTTTTGGTCCAAAGATGAAATCTTAATGATAGTTGGGTGTATTCCGGATTTTCGCAATAA  
TCGCTTATTTTACAGCCGATTAACCGCATTTTATATGTTTAGAATCTATTTACTTACATTTGAAGGGCATTAAACTTT  
TTTTGAAAAATTACAGTGAAAAAAAAGTAGTTCTTTTTATTCAATATCTTTATGGGGCAAAAAGAATTGAAAACGAT

TAAT-----CAAAAA-----ATTTCTTTATTAACTTATTAACA-----ATGAATAATAAA-----  
GAAAGGGCTTCTTTT-----TTTTCGAAAAA---CCA---TAT-----GAAATAAATGTA--  
-AAGTTAACAAA---TTGCTG-----CGATCTTTTATTACTATTACT-----TATTTTGAA---AAT-----  
AGAAT-----ATT---  
TCTTTATATCCTTATGAATCGGACAATACTATGTTATTTCTCTGATTATATTGATCATGTTTACTTTATTTCGTTGGATT  
CATAGGAATC---CCATTT-----  
AATCAAGAAGGAATGGATTTGGATATATTAATAAATGGTTAACTCCATCTATA-----  
AATCTTTTACATTCCAATTCAGAAAAAT-----TTTGTGGATTGG-----  
TATGAATTTGTGATAAATGCAATTTTTTCAATTAGTATAGC  
Triticum  
CTCCTTGTCTATTACTCAAACAAGCATGAAACGTATGCTTGCATATTCGTCCATAGGGCAAATCGGATATGTAATTATTGG  
ATAAATTGTTGGAGACTCAAATGATGGATATGCAAGCATGATAACTTATATGCTGTTCTATATCTCCATGAATCTAGGAA  
CTTTTGCTTGCATTGTATTATTTGGTCTACGTACCGGAACTGATAACATTTCGAGATTATGCAGGATTATACACGAAAGAT  
CCTTTTTTGGCTCTCTCTTTAGCCCTATGTCTCTTATCCCTAGGAGGCCCTTCTCCACTAGCAGGTTTCTTCGAAAAC  
CTATCTATTCTGGTGTGGATGGCAAGCAGGCCTATATTTCTTGGTTTTCAATAGGACTCCTTACGAGCGTTCTTTCTATCT  
ACTATTATCTA-----AAAATAATCAAGTTATTAATGACT-----  
GGACGAAACCAAGAAATAACCCCTTATGTGCGAAATTATAGAAGA-----TCCCCT-----TTA-----  
AGATCAAACAATTCCATCGAATTGAGTATGACTGTATGTGTGATAGCATCTACTATAACCAGGAATATCAATGAACCCCAT  
TCTTGCAATTGCTCAGGATACCCTCTTTTAG-----  
ATGTTTCTGCTTACGAATATGATATTTTTTGGACATTTCTAATAATAGCA-----  
AGCCTTATTCCTATTTTGGCATTTCGATTTTTCAGGACTTTTAGCCCCGGTTAGTGAAGGACCAGAGAAGCTTTCTAGTTA  
TGAATCGGGTATAGAACCCATGGGAGGGGCTTGGGTACAATTCCGAATACGCTATTATATGTTTGCCTCGTTTTTGTGG  
TTTTTGATGTGGAAACCGTCTTTCTATACCCTTGGGCAATGAGTTTTCGACGTATTGGGTGTATCCGTTTTTATCGAAGCT  
TTGATTTTTCGTGCTTATCTTAGTTGTTGGTTTAGTTTATGCATGGCGAAAAGGAGCCTTGGAAATGGTCTTAA-----  
-----ATGAGTTATTT-----  
CCTTGGTTAACAATACTTGTGTTTTGCCGATATTTGCAGGTTCAATATTTTCTTTTTTACCT-----  
CATAAGGGAAACAAA-----  
GTCGTTAGGTGGTATACTATATCTATTTGTTTATTAGAATTCCTTCTAATGACTTATGCGTTCTGTTATCATTTC-----  
-----CAACTGGAGGATCCCTTAATCCAATTAAGGAGGATTATAAATGGATAGAT---  
GTCTTCGATTTCCACTGGAGATTGGGAATCGATGGACTTTCATTAGGATCTATTTTATTGACAGGATTTATCACTACTTT  
AGCTACTTTTAGCAGCTTGGCCAATTACACGGAATTCGCGATTATTCTATTTTCTGATGCTCGCAATGTATAGTGGTCAAA  
TAGGATTATTTTCTTCGCGAGACCTTTTACTTTTTTTTTATCATGTGGGAGTTAGAATTAATTCCTGTT---  
TACTTACTTTTATCCATGTGGGGGGGAAGAGGCGTCTATATTCAGCTACAAAGTTTATTTTGTATACTGCAGGCGGTTT  
CATTTTTTTCTTAATCGGAGTTCTGGGTATGGGCTTATATGGTTCCAACGAACCAGGATTAGATTTGGAAAGATTAATTA  
ATCAATCATACCCTGCAACCTTGGAAATACTTTTATATTTTGGCTTCCTTATTGCTTATGCTGTCAAATGGCCGATTATA  
CCCCTACATACGTGGTTACCAGATACCCATGGGGAAGCACATTATAGTACATGTATGCTTTTAGCGGGAATATTATTA  
GATGGGAGCATATGGATTGATTCCGATCAACATGGAATTGTTACCTCATGCTCATTATCTATTTTTCGCCCTGGTTAGTAA  
TAATAGGAGCGATCCAAATAATCTATGCAGCTTCAACTTCTCTTGGTCAACGAAATTTCAAAAAAGAATAGCTTATTCC  
TCTGTATCTCACATGGGTTTATAAATTATAGGAATTGGTTCCATAACCAACATTGGACTCAATGGAGCTATTTTACA  
ATTATCCCATGGATTTATTGGT-----  
GCTACACTTTTTTCTTGGCAGGAACCGCTTCTGATAGAATGCGTCTTGTATTCTCGAAGAACTGGGGGAATATCT--  
-----  
ATCCCAATGCCTAAAATTTTTACCATGTTTAGTAGCTTTTCAATGGCTTCTCTTGCCTTACCAGGAATGAGTGGTTTTGT  
CGCAGAATTAGTAGTATTTTTTGGACTAATTACTAGTCCAAAATTTCTGTTAATGCCAAAACACTAATTACTTTTTGTAA  
TGGCAATTGGAATGATATTAATCCTATTTATTTATCTATGTTACGC-----  
CAGATGTTCTATGGATAACAAG-----CTATTTAATGTTCCAAAC---GCAAT-----  
TTTTGTGATTTCTGGACCACGAGAACTCTTTATTTAATCTGTATCTTTTTTACCAGTAATAGGAATTGGTATTTTATCCAGA  
TTTTGTTCTCTCCCTATCCGTTGACAGGGTAGAGGCTCTCTTATCCAATTATTATCCTAAATAG-----  
ATGATGTTT-----  
GAGCATGTACTTTTTTGGAGTGTCTATTTATTTTTCGATTGGTATCTATGGATTGATCACAAGCCGAAACATGGTTAGAGC  
TCTAATATGTCTTGAACCTATACTGAATTCAAATTAATCTAAATCTCGTAACATTTTCTGATCTATTTGATAGTCGCCAAT  
TAAAAGGAGATATTTTTCGCAATTTTTGTTATAGCCCTTGCAGGCTGCTGAAGCCGCTATTGGACTATCCATTCTTTCTTCC  
ATCCATCGTAATAGGAAATCCACTCGTATCAATCAATCTAATTTATTGAATAATTAGATGGAACATACATATCAATATGC  
ATGGGTAATCCCTCTTCTCCACTTCCAGTTATTATGTCAATGGGATTTGGCCTTATTCTTATTCCGACAGCAACAAAA  
ATCTTCGTGCGCATATGGGCTTTTCTAGTGTTTTACTCTTAAGTATAGCTATGGTATTCTCAGTTCAACTGTCTATTCAA  
CAAATAAATGGAAGTTTCGATCTATCAATATCTATGGTCTTGGACCGTCAATAATGATTTTTCTTTAGAATTTGGATACTT  
GATTGACCCACTTACTTCTATTATGTTAATACTAATTACTACTGTAGGAATCCTGGTTCTTATTTATAGTGATGGTTATA





AATGGGAGCGTATGGTTTGGTTCGGATCAATATGGAATTATTACCCACGCTCATTCTATATTTTCTCCCTGGTTGGTAG  
TAGTAGGTACAATGCAAATAATCTATGCAGCTTCAACATCTTCTGGTCAACGTAATTTAAAAAAGAATAGCCTATTCC  
TCTGTATCTCATATGGGTTTATAATTATAGGAATTGGTTCATAACCGATACGGGACTCAACGGAGCCATTTTACAAAT  
AATCTCTCATGGATTTCTTGGT-----  
GCTGCGCTTTTTTCTTGGCAGGAACCAGTTATGATAGAATACGTCTTATTTATCTCGACGAGATGGGCGGAATAGCT--  
-----

ATCCCAATGCCAAAATATTCACAATGTTTCAAGTATCTTATCGATGGCTTCCCTTGCATTACCGGGCATGAGCGGTTTTGT  
TGCAGAATTGATAGTCTTTTTTGGAAATAATTACCAGCCAAAATTTCTTTAATGCCAAAATACTAATTACTTTTTGTAA  
TGGCAATTGGAATGATATTAACCTCTATTTATTTCATTATCTATGTCACGC-----  
CAGATGTTCTATGGATAACAAG-----CTATTTAATGCCCAAAC---TCTTAT-----  
TTTTTTGATTCTGGACCAGAGATTTATTTGTTTTGATCTCTATCTTTTACCCGTAATAGGTATTGGTATTTACCCGGA  
TTTCGTTCTCTCATTATCAGTTGACAAGTTGAAGCTATTCTATCTAATTTTTTTTATAGATAG-----  
ATGATGCTC-----

GAACATGTACTTGTGTGAGTGCCTATTTATTTTCTATCGGTATCTATGGATTGATCAGGAGTCAAAAATATGGTTAGAGC  
TCTTATGTGCTTGAACCTATACTGAATGCAGTTAATAAATTTTCTGAACTTTTTCTGATTTTTTTGATAATCGACAAT  
TAAAAGGAGACATTTTCTCAATTTTTGTTATAGCTATTGCAGCCGCTGAAGCTGCTATTGGACCAGCTATTGTTTCGTCA  
ATTTATCGTAATAGAAAATCAACTCGTATTAATCAATCGAATTTGTTGAATAAGTAGATGGAACATACATATCAATATGC  
ATGGATCATACTTTTCTTCCACTTCCAATTCCTATGTTACTAGGAGTGGGACTTCTCCTTTTTCCAACAGCAACAAAA  
ATCTTCGGCGTATGTGGTCTTTTACTAGTGTATTTGTTAAGTATAGTTATGACTTTTTTCGGTCAATCTGTCTATTCT  
CAAATAAATAGCAGTTCTATATATCAATATGTATGGTCTTGGACCATCAATAATGATTTTTCTTTAGAGTTCGGCTACTT  
GATTGATCCACTTACTTCTATTATGTCAATATTAATCACTACGTTGGAATTATGGTCTTATTTATAGTGACAATTATA  
TGTCTCATGATCAAGGATATTTGAGATTTTTTGGTTATATGAGTTTTTCAATGCTTCCATGTTGGGATTAGTTACTAGT  
TCTAATTTGATACAAAATTTATATTTTTTGGGAATTAGTTGGAATGTGTTTCATATTTATTAATAGGTTTTTGGTTCACACG  
GCCTATTGCGGCAATGCTTGTCAAAAGGCGTTTGTAACTAATCGTGTAGGGGATTTTGGTTTTATTATTAGGAATTTTGG  
GTCTTTATTGGATAACAGGTAGTTTCGAATTTCCGGATTTGTTTCAAATATTTAATAACTTGATTTATAATTATAAT---  
AATGGG-----

ACAAATTTTTTTATTTGTTTCTTGTGTGCTTTATTCTTATTTGTCGGTGCAGTTGCTAAATCGGCTCAATTTCCCCTTCA  
TGTATGGTTACCCGATGCAATGGAGGGCCTACTCCTATTTTCGGCTCTTATAACATGCTGCTACTATGGTAGCAGCGGAA  
TTTTCTTGTAGCTCGCCTTTTTCTCTTTTTCATAGTCATACCTTACATAATGAATCTAATATCTTTGATAGGTATAATA  
ACAATATTATTAGGAGCTACTTTAGCTCTTGTCTCAAAAAGATATTAAGAAAAGTTTGGCCTATTCCACAATGTCTCAATT  
GGGTTATACGATGTTAGCCCTAGGTATGGGGTCTTATCGAGCTGCTTTATTTTCAATTTGATTACTCATGCTTATTTCGAAA  
CATTATTGTTTTTAGGATCCGGATCGATTATTCATTCAATGGAAGCTATTGTTGGATATTCTCCAGATAAAAAGTCAAAAT  
ATGGTTCTTATGGGTGGTTTAAACAAAACATGTGCCAATTACAAAAATACCTTTTTTATTAGGTACACTCTCTCTTTGTGG  
TATTCCGCCTCTTGTCTGTTTTTGGTCCAAAAGATGAAATTTCTTAATGATAGTTGGTTGTATTACCTATTTTTGCAATAA  
TAGCTTGTTTAACGGCAGGATTAACCGCATTTTATATGTTTCGGATCTATTTACTTACTTTTGAAGGATATTTAATGTT  
CATTGTAAAAATTACAGTGGAAAAAAAGTAGCTTGTCTATTCAATATCTCTATGGGGTAAAGAAGGTCAAAAAACAAT  
TAAA-----AAAAA-----ATTCGTTTTATTACTCTATTAACA-----  
ACGAATAATAATGAAAATGAAAAGGCTTCTTTT-----TTTTCGAAGAAA---GTA---TAT---CGA-----  
-CTTGATAGTAATGTA---AGAAAG-----ATGACA-----CGACCCTTTATTACTATTAAT-----  
CAGTTTGAC---AAT-----AAGAAC-----ACT---

TTTTTGATCCCCAGGAATCGGACAATACTATGTTATTCCCTCTGTTTGCATTAGCCCTATTTACTTTGTTTCGTTGGAGC  
CATAGGAATT---CCTTTC-----  
AATCAAGAAAGAATGGATTTTGATATATTATCGAAATGGTTAAATCCGGCTACA-----  
AACCTTTTACATAAAAATTTGAATAAC-----TATGGGGATTGG-----  
TATGAATTTGTTATAAATGCAATTTTTTTCAGTCAGTATATC

Yucca

-----  
-----  
-----  
-----  
-----  
-----  
-----  
-----  
-----  
-----

Lined writing area consisting of multiple horizontal dashed lines.

Zea

CTCCTTGCTATTACTCAAACAAGCATGAAACGTATGCTTGCATATTCGTCCATAGGGCAAATCGGATATGTAATTATTGG  
AATAATTGTTGGAGACTCAAATGATGGATATGCAAGCATGATAACTTATATGCTGTTCTATATCTCCATGAATCTAGGAA  
CTTTTGCTTGCATTGTATTATTTGGTCTACGTACCGGAACTGATAACATTCGAGATTATGCAGGATTATACACGAAAGAT  
CCTTTTTGGCTCTCTCTTTAGCCCTATGTCTCTTATCCCTAGGAGGCCTTCCTCCACTAGCAGGTTTCTTCGGAAAAC  
TCTATCTATTCTGGTGTGGATGGCAAGCAGGCCTATATTTCTTGGTTTCAATAGGACTCCTTACGAGCGTTCTTTCTATCT



ACTATTATCTA-----AAAATAATCAAGTTATTAATGACT-----  
GGACGAAACCAAGAAATAACCCCTTATGTGCGAAATTATAGAAGA-----TCCCCT-----TTA-----  
AGATCAAACAATTCCATCGAATTGAGTATGACTGTATGTGTGATAGCATCTACTATAACCAGGAATATCAATGAACCCCAT  
TCTTGCAATTGCTCAGGATACCCTCTTTTAG-----  
ATGTTTCTGCTTCACGAATATGATATTTTTTGGACATTTCTAATAATAGCA-----  
AGCCTTATTCCTATTTTTGGTATTTTTGGATTTTCAGGACTTTTAGCCCCGGTTAGTGAAGGACCAGAGAAGCTTTCTAGTTA  
TGAATCGGGTATAGAACCCATGGGGGGGGCTTGGTTACAATTCCGAATACGCTATTACATGTTTGGCGCTAGTTTTTGTG  
TTTTTGATGTGGAAACAGTCTTTCTCTACCCTTGGGCAATGAGTTTCGACGTATTGGGTGTATCCGTTTTTATCGAAGCT  
TTCATTTTTGTGCTTATCCTAGTTGTTGGTTTAGTTTTATGCATGGCGAAAAGGAGCCTTGGAAATGGTCTTAA-----  
-----ATGAGTTATTT-----  
CCTTGGTTAACAATACTTGTGTTTTGCGGATATTTGCAGGTTCAATATTTTCTTTTTACCT-----  
CATAAAGGAAATAAA-----  
ATCGTTAGGTGGTATACTATAGCTATTTGTTTATTAGAATTCCTTCTAATGACTTATGCATTCTGTTATCATTTT-----  
-----CAATTGGAGGATCCTTTAATCCAATTAAGGAGGATTCTAAATGGATAGAT---  
GTTTTCGATTTCCACTGGAGATTGGGAATCGATCCACTTTCATTAGGATCTATTTTTATTGACAGGATTTATCACTACTTT  
AGCTACTTTAGCGGCTTGGCCGGTACTCGGAATTCGCAATTATTCTATTTCTGATGCTAGCAATGTATAGCGGTCAA  
TAGGATTATTTTCTTACGAGACCTTTTACTTTTTTTTTATCATGTGGGAGTTAGAATTAATTCCTGTT---  
TACTTACTTTTTATCCATGTGGGGGGGAAAGAGGCGTCTGTATTAGCTACCAAGTTTTATTTGTATACTGCAGGCGGTTT  
CATTTTTTTCTTAATTGGAGTTCTGGGTATGGGATTATATGTTCCAATGAACCCGGATTAGATTTAGAAAGATTGATTA  
ATCAATCATAACCTACAACATGGGAAATACTACTGTATTTTGGCTTCCTTATTGCTTATGCTGTCAAATTGCCGATTATA  
CCTTTACATACGTGGTTACCATATACCCATGGGGAAGCGCATTACAGTACATGTATGCTTTTAGCCGGAATTCTATTAAA  
GATGGGAGCATACGGATTGATTCCGGTCAATATGGAATTGTTACCGCATGCTCATTATCTATTTTCCCCTTGGTTGGTAA  
TAATAGGAGCGGTGCAAATAATCTATGCAGCTTCAACTTCTTGGTCAACGAAATTTCAAAAAAAGAATAGCCTACTCC  
TCCGTATCTCACATGGGTTTATAAATTATAGGAATTGGTTCATAACCAACATTGGACTAAATGGAGCTATTTTACAAAT  
ATTATCTCATGGATTTATCGGT-----  
GCTACACTTTTTTTCTTGGCGGGAACGGCTTGTGATAGAATGCGTCTTGTTTATCTCGAAGAACTGGGGGGAATATCT--  
-----  
ATCCCAATGCCAAAAATTTTTACCATGTTTAGTAGCTTTTCAATGGCTTCTCTTGCCTTGGCCGGGAATGAGCGGTTTTGT  
TGCAGAATTAGTAGTATTTTTTGGACTAATTACTAGTCCATAAATTTATGTTAATGCCAAAAATGCTAATTACTTTTTGTAA  
TGGCAATAGGAATGATATTAACTCCTATTTATTTATTATCTATGTTACGC-----  
CAGATGTTCTATGGATAACAAG-----CTATTTTCATGTTCCAAAC---AAAAAT-----  
TTTGTAGATTCTGGACCACGAGAACTCTTTCTTTTAATTTGTATCTTTTTACCAGTAATAGGAATTGGTATTTATCCAGA  
TTTGGTTCTCTCGCTATCCGTTGATAGGGTAGAGGTTCTATTATCCAATTATTATACTAAATAG-----  
ATGATGTTT-----  
GAGCGAGTACTTTTTTGGAGTGTCTATTTATTTTCGATTGGTATCTATGGATTGATCACAAGCCGAAACATGGTTAGAGC  
TCTAATATGTCTTGAACCTATACTGAATTC AATTAATCTAAATCTCGTAACATTTTCTGATCTATTTGATAGTCGCCAAT  
TAAAAGGAGACATTTTCGCAATTTTTGTTATAGCCCTTGGCGCTGCTGAAGCAGCTATTGGACTATCCATTCTTTCTTCC  
ATCCATCGTAACAGGAAATCAACTCGTATCAATCAATCCAATTTTTTGAATAATTAGATGGAACATACATATCAATATGC  
CTGGGTAATTCCTCTTCTCCACTTCCAGTTATTATGTCAATGGGATTTGGACTTTTTCTTATTCTACAGCAACAAAA  
ATCTTCGTCGGATATGGGCTTTTTCTAGTATTTTACTCTTAAGTATAGCTATGGTATTCTCACTTCACCTGTCTATTCAA  
CAAATAAATGGAAGTTCTATCTATCAATATCTATGGTCTTGGACCATCAATAATGATTTTTCTTTAGAAATTTGGATACTT  
GGTCGACCCCTTACGTCTATTATGTTAATACTAATTACTACTGTAGGAATCTTAGTTCTTATTTATAGTGACGATTATA  
TGTCTCACGATGAAGGATATTTGAGATTTTTTGTTTATATAAGTTTTTTTTAATACTTCCATGTTAGGATTGGTTACTAGT  
TCCAATTTGATACAAATTTATTTTTTTGGGAACTTGTGGGAATGTGTTCCATTTTATTGATAGGTTTTTGGTTTTACGCG  
GCCAATTCAGCGAGTGCTTGTCAAAAAGCTTTTGTAACTAATCGTGTAGGGGATTTTGGTCTGTTATTAGGAATTTAG  
GTTTTTTTTGGATAACGGGTAGTTTGGAGTTTCCGGATTTGTTCAAAATAGCTAATAACTGGATTCT-----AAT---  
AATGGG-----  
ATTAATTCCTTACTTACTACTTTTGTGTGCTTTTTTATTATTCCTTGGTGCAGTTGCAAAATCTGCACAATTTCTCTTCA  
CGTATGGTTACCTGATGCTATGGAAGGACCCACTCCTATTTTCGGCTCTTATACACGCAGCAACTATGGTTGCTGCGGGGA  
TTTTTCTTCTAGCTAGACTTCTTCTCTTTTTCATATCCCTACCCTGGATAATGAGTTTCATTTCTTTAATAGGTACAATA  
ACACTCTTCTTAGGAGCCACTTTAGCTCTTGCTCAGAGAGATATTAAGAAGCTTAGCCTATTCTACAATGTCTCAATT  
GGGTTATATGATGTTAGCTCTAGGTATAGGTTCTTATCAAGCTGCTTTATTCCATTTGATCACTCATGCTTATTTCGAAAG  
CTTTATTGTTCTTAGGATCCGGATCCGTTATTCATTCAATGGAACCTCTTGTGGATATTCACCAGATAAAAAGTCAGAAT  
ATGGTTCTTATGGGTGGTTAAGAAAATACGTTCCAATTACAAGAACTACTTTTTTATGTGGTACACTTTCTCTTTGTGG  
TATTCCACCTCTTGTCTGCTTCTGGTCCAAAGATGAAATCCTTAGTAATAGTTGGTTGTATTACCCTTTTTTGGAAATA  
TAGCTTCTTTTACTGCAGGATTAAGTCAATTTTATATGTTTCGGATATATTTACTTACTTTTGGTGGTATTTGCGTGT  
CATTTTCAAAATTACAGTAGTACTAAAGAAGTTTCTTGTATTCAATATCCTTATGGGGAAAAGTATATCCAAGGAGT

CAAT-----AGGGAT-----TTTGTT-----TTATCAACA-----ATGAAGAGT-----  
GGAGTTTCTTTT-----TTTTACAAAAT---ATA---CCA---AAA-----ATTCTGCTAATACA---  
AGAAAT-----AAGATA-----GGATCCTTTAGTACT-----CCCTTTGGG---GCT-----  
AAAAAT-----ACT---  
TTTGTCTATCCTCATGAAACGGGAAATACTATGCTATTTCTCTTCTTATATTACTACTTTTTACTTTGTTTCATTGGATC  
CATAGGAATC---  
CATTTTGATAATGGAGTAAAAGATAATAGAATATTGGAGTTAACCATATTATCAAAGTGGCTAACTCCTTCAATA-----  
-AACTTGTTCAGGAAAATTCTAATTCT-----TCCATAAATTCA-----  
TATGAATTTCTCACTAATGCAATTTCTTCTGTAAAGTTTAGC

Acorus           CTTTTTGGGGATATTTCTA---  
GCATACATATTTTATGGGTCTGTTTATTCATCTTTTCAAATTTGGACTTAATCAATTCGTTTGT-----  
CGAATAGATTCTAAG---AGA-----  
ATTTTATCGGATCGAATAATAAATGGGATATACAATTGGTCATATAATCGTGGTTACATCGACGTTTTTTATGGAAAAGT  
TTTAAGTAATACTATAAGAGGACTTGCAGAATTAATTCATTTTTTTGATAGACGAGTTATTGATGGGATTACAAATGGGG  
TTGGTGTGTAAAGTTTCTTTGTAGGAGAAGGGATAAAATCTGTAGGGGGTGGACGAATCTCATCTTATATCTTCTTGTAT  
GCATTTTCTGTATCAATTTGTTTAATAATTTATTATTTTTTTCAGGTTCTAA-----

ATGGATTTACCTGGACCAATACATGATGTTCTTTTAGTATTTCTGGGATCAGGTCTTATATTAGGAGGTTTAGGAGTGGT  
ATTACTTACCAATCCAATTTATTCTGCCTTTTCATTGGGATTGGTTCTT---GTTTGTATATCCTTA---  
TTCTATATTCTATCGAACTCCTATTTTGTAGCTGCTGCACAGCTCCTTATTTACGTGGGAGCCGTAATGTCTTAATCAT  
ATTTGCTGTGATGTTTATGAATGGTTCAGACTATTCCAACGATTTCTATCTT-----  
TGGACCGTTGGGGATGGAGTCACTTCACTGGTTTGTACAAGTATTCTTTTTTCACTAATTACTACTATCCTAGATACGTC  
ATGGTACGGAATTATTTGGAATACAGGATCGAACCCAGATTGTAGAGCAGGACTTAACAAGTAACGTTCAACAAATTGGAA  
TTCATTTATCAACAGATTTTATCTTCCATTTGAACTCGTTTCAATAATTTCTTTTAGTTGCCTTGATAGGTGCAATTACT  
ATGGCGCGTCACTACTAA-----

-ATGAATCGGAGAAGAAAAGATATGACT-----  
GTACCAGTACAAGACAAGACCTTATGATAGTTAATATGGGTCCTCACCACCCATCAATGCACGGTGTCTTTCGCCTGAT  
CGTTACTCTCGACGGTGAAGATGTTTATTGACTGTGAACCCATATTGGGTTATTTACATAGAGGGATGGAAAAAATTGCAG  
AAAACCGAACAATTATACAATATCTGCCTTATGTAACACGTTGGGATTATTTAGCTACTATGTTTACAGAAGCAATAACA  
GTAAATGGGCCCGAACAATTGGGAAATATTCAAATACCTAAAAGAGCCAGCTACATCAGAGTAATTATGTTAGAGCTGAG  
TCGGATAGCTTCTCATTGTTATGGCTTGGTCCATTTATGGCGGATATCGGTGCACAAACACCCTTTTTTTATATTTTCA  
GAGAGAGGGAATTGATATATGATCTATTTCGAAGCTGCTACAGGTATGCGAATGATGCATAATTATTTCCGTATAGGAGGA  
GTTGCTGCTGATCTACCTTATGGCTGGATAGATAAATGTTTAGATTTCTGCGATTATTTTTTAAACAGGAATTGTTGAATA  
TGAAAAGCTTATTACACAGAATCCTATTTTTTTGGAACGAGTTGAAAGAGTGGGCATTATTAGTGGGGAGGAAGCCATAA  
ATTGGGGTTTATCAGGACCCATGTTACGAGCTTCCGGAATAGAATGGGATCTTCGTAAAGTTGATAATTATGAGTGTAT  
AATGAATTTGATTGGGAAGTCCAATGGCAAAAAGAAGGAGATTATTAGCTCGTTATTTAGTCCGAATTAGTGAATGAA  
AGAATCCATAAAAATTATTCAACAGGCTCTAGAAGGAATCCCTGGGGGGCCCTATGAAAATTTAGAGGTTTCGGCGCTTG  
AT-----AAAGTC---

AAGGATTCGGAATGGAATGATTTTGAATATAGGTTTATTAGTAAAAAGCCTTTCGCCTACTTTTTGAATTGGCGAAACAAGA  
ACTTTATGTGAGAGTAGAAGCACCAAAGGGAGAATTAGGAATTTTTCTGATAGGAGATAATAGTGTTTTCCCCTGGAGAT  
GGAAAATTCGTCCACCCGGTTTCATCAATTTGCAAATTTCTTCTCAACTAGTTAAAAGAATGAAATTTGGCCGATATCATG  
ACGATACTAGGTAGTATAGATATCATTATGGGAGAAGTTGATCGTTGAATGTTCCCTATGGTGACTGGGTTTCATGAATTA  
TGGTCAACAAACAGTACGAGCTGCAAGGTACATTGGTCAAAGTTTCATGATCACCTTATCGCACGCGAATCGTTTACCTG  
TAACTATTCAATATCCTTATGAAAAATTGATCACATCAGAGCGTTTTTCGTGGTTCGAATCCACTTTGAATTTGATAAATGT  
ATCGCTTGTGAAGTATGTGTTTCGTGTATGCCCTATAGATCTACCCGTTGTTGATTGGAGATTGGACACAGATGTTAGAAA  
AAAACAATTTGCTTAATTATAGTATTGATTTTTGGAGTCTGTATATTTTTGTGGCAACTGCGTCGAGTATTGTCCAACAACT  
GTTTATCCATGACTGAAGAATATGAACTTTCTACTTATGATCGTCACGAATTGAATTATAATCAAATTTGCTTTGGGGCGG  
TTACCGATGTCAGTAATTGAGGATTACACAATTCGAACAACCTACAAATTTGACTCCAATTAATAATAGCTAAAAATAAACC  
CCTGGGTTTCACGAACGATTACTAATTAA-----  
-----ATGCAG---

GGTCGTTTATCTGCTTGGCTAGTCAAGCATGAGCTAGTTCATAGATCTTTGGGCTTCGATTACCAAGGAATAGAGATTTT  
ACAAATAAAACCCGAGGATTGGGATTCCATTGCTGTCAATTTATACATGATATGGTTACAATTTTACGTTCCCAGTGTG  
CCTATGATGTAGCACCCGGCGGATTTTTAGCCAGTGTCTATCATCTTACGAGAATACAGTATGGTGTG---  
GATCAACCGGAAGAGGTATGCATAAAAGTATTTGCTCCAAGGAGGAATCCTAAAATCCCCTGCTGTTTTCTGGATTTGGAG  
AAGTGTGATTTTTCAAGAACGGGAATCTTATGATATGTTGGGAATTTCTTATGAAAATCATCCGCGCCTTAAACGTATTT  
TGATGCCTGAAAGTTGGATAGGCTGGCCCTTACGTAAGGATTATATTGCCCCCAATTTCTATGAAATTCAGATGCTCAT

TGAATGGGCAATGAGTTTCGATGTATTGGGTGTATCCGTATTTCTAGAAGCTTTGATTTTCGTGCTTATCCTAATTGTTG  
GTTTCAGTTTTATGCATGGCGAAAGGGGGCATTGGAATGGTCTTAGCTCCTGAATATTCG---GACAATCAAAAA-----  
GAAGGAAAA---GATTACATCGAGACAGTTATGAATTCTATT---  
GAGTTTCCGTTACTTGACCGAACAACCCCAAATTCAGTTATTTCA-----  
ACTACATTGAATGATCTTTTCGAACTGGTCAAGACTATCCAGTTTATGGCCGCTTCTCTACGGTACCAGTTGTTGCTTCAT  
CGAATTTGCTTCATTAATAGGCTCGCGATTTCGACTTTGATCGTTATGGATTGGTACCAAGATCGAGTCTTAGGCAAGCGG  
ACCTAATTTTAAACAGCTGGCACAGTAACAATGAAAATGGCTCCCTCTTTAGTGAGATTGTATGAGCAAATGCCTGAACCA  
AAATATGTCATTGCTATGGGAGCTTGCCTATTACCGGAGGGATGTTTCAGTACCGATTCTTATAGTACC---  
GTTTCGGGGAGTCGATAAGCTAATTCCTGTCTGATGTCTATTTGCCGGGCTGCCCCCTAAGCCAGAGGCAGTTATAGATGC  
TATAACAAAACCTTCGTAAGAAGTTATCTCGAGAAATCTCTGAAGAT---AGAATGGGGTCT-----CAACGTGAA-  
-----AATCGATGTTTTACG-----ACCAATCACAAATTTTATGTT-----  
CGACGCAGTACTCATACTGGAAATTACGATCAAGGATTACTCTATCAA-----  
-----TCGCCACCT-----ACTGCAGAAATA---CCTTCG----  
--GAAACAGAACCCTTTTTCAAATACAAA---AGTTTCAGTATCTTCC-----  
CGCGAATTAGGGAATGAATCAGGCAAGGAAGATGTTTCTATACAGAATAAATAAATGCAA---  
AATCGAAATACCTTTTCTTGGGTAAAGGAACAGATGACTCGATT-----  
ATTTTCAGTATCGATCATG-----ATATATGTAATA---  
ACTCGGACATCTATTGCAAATGCATATCCCATTTTTGCACAACAGGGTTATGAAAATCCACGAGAAGCAACTGGACGCAT  
TGTATGTGCTAATTGCCATTTGGCGAATAAGCCCGTGGATATTGAAGTTCACAAGCCGTGCTTCTGATACTGTATTTG  
AAGCAGTTGTTAGAATCCCTTATGATAAGCAACTGAAACAAGTCTTGTCTAATGGTAAAAAGGGGTCTTTGAATGTAGGG  
GCTGTTCTTATTTTACCCGAGGGATTTGAATTAGCCCCCCCC---  
GATCGTATTTCTCCAGAAATGAAAGAAAAGATGGGG---AATCTGGCT---TTTCAGAGT---  
TATCGCCCTACTAAAAAAAATATTATTGTGATAGGTCCTGTTCCGGGTGAGAAATATAGTGAAATCGTCTTTTCTTCT  
TTCCC  
Amborella CTTTTTTGGAATATTAATA---  
GCCAATCTTTTATATGGGTCTGTTTCATTTCATCTTTCCAGAATTTGGACTTAATCAACTCATTGCA-----  
AAGATATATACTAAGATAAGA-----  
ATCTTTTCGGACCAAGCAACTAAATGTCTATATACAATTTGGTTCATATAATCGCGGTTACATAGATCTTTATTATGCAACAAT  
CTTAACTAGAGGTATACGAGGATTAGCTGAATCCACTCATTTTTTTGATCAACGGATAAATTGATGGAGTCACGAATGCAG  
TTGGTATTACAAAATTTCTTTGTAGGAGAAGCGATCAAATATATGGCGGGTGAAGAATCTCTTCTTACCTCTTTTTTTTCG  
TTATCCTCTTTATCAATAGCCCTTATTTTAGTATATTTTTATTTGATTTTTGA-----  
-----  
ATGGATTTACTTGGACCAATACATGATATTCTTTTGGTATCTTTGGGCTCAGGTATTATATTAGGAAGTTTAGGAGTAGT  
ATTACTTACCAATCCTATTTATTCTGCCTTTTCATCGGGATTGGTTCTT---GTTTCGTATATCCTTA---  
TTCCATATTCTATCAAACCTCCTATTTTGTAGCTGCTGCACAGCTCCTTATTTACGTAGGAGCCATAAATGTCTTAATCAT  
ATTTGCTGTGATGTTTCATGAATGGTTCAGAATATTACAATAATTTCCATCTT-----  
TGGACCGTTGGAGATGGGATCTCTTCAGTAGTGTGTACAAGTATTCTTTTTTCACTAATTGCTACTATTCTAGATACGTC  
ATGGTACGGGATTATTTGGACTACAAGATCAAATCAGATCATAGAGCAGGACCTTACAAGTAACGTACAACAAATTGGGA  
TTCATTTATCAACTGATTTTTTTCTTCCATTTGAACTCATTCTATAATTCTTTTAGTTGCCTTGGTAGGGCAATTGCT  
ATGGCTCGTGCGGAATAA-----  
-----ATGACT-----  
GTACCAGCTACAAGAAACGACCTCATGATAGTCAATATGGGTCCCTCACCATCCATCAATGCATGGTGTCTTTCGACTCAT  
AGTTACTCTAGACGGTGAAGACGTTATTGACTGTGAACCCATATTAGGTTATTTACACAGAGGGATGGAAAAAATTGCAG  
AAAATCGAACAATCATACAATATCTTCCTTATGTAACACGTTGGGATTATTTAGCTACTATGTTTCACAGAGGCAATAACA  
GTGAATGCACCGGAAGAGTTGGGAAATATTCAAGTACCTAGAAGAGCCAGCTATATCAGAGTAATTATGTTGGAGCTCAG  
TCGTATAGCTTCTCATTTGTTATGGCTTGGACCTTTTATGGCTGATATCGGTGCACAGACTCCTTTCTTCTATATTTTCA  
GAGAGAGAGAATTGCTATATGATCTATTTGAAACTGCCACAGGAATGCGAATGATGCATAATTTTTTCCGTATCGGAGGA  
GTAGCTGCTGATTTACCTCATGGCTGGATAGATAAAATGTTTGGATTTCTGTGATTATTTCTTACCAGAAGTTGCTGAATA  
TCAAAAACCTTATTACACGTAATCCCATCTTTTTGGAACGAGTTGAAGGAGTGGGCTTTATTGCTGAAGAGGAAGCAATAA  
ATTGGGGTTTATCAGGACCAATGTTACGAGCTTCCGGAATACCATGGGATCTTCGTAAAGTCGATCATTATGAGTGTTAC  
GATGAATTTGATTGGGAAGTCCAATGGCAAAAAGAAGGAGACTCATTAGCTCGTTATTTAGTACGAATCAGTGAAATGAT  
AGAATCCGTCAAATATTCAACAGGCTCTAGAAGGAATTCGGGGGGGCCCTATGAAAATTTAGAAGCCCACGCTTTG  
AT-----AGAGTA---  
AGAAATATAGAATGGAATGATTTTTGAATATCGATTTATTAGTAAAAAACCTTCTCCCCTTTTGAATTGTCGAAACAAGA  
ACTCTATGTGAGAGTAGAAGCTCCAAAAGGGGAATTAGGGATTTTTCTAATAGGAGATAATAGTGTTTTTCCCTGGAGAT  
GGAAAATTCGTCCACCCGGTCTTATCAATTTGCAAATTTCTCCTCAGCTAGTTAAAAGAATGAAATTTGGCTGATATCATG  
ACGATACTAGGTAGTATAGATATCATTATGGGAGAAGTTGATCGTTGAATGTTCCCTATGGTACTGGGTTTCATGAATA

TGGTCAACAAGCAGTGCAGCTGCAAGATATATTGGTCAAAGTTTCATGATTACCTTATCTCACGCGAATCGTTTACCTG  
TAACCATTAGTATCCTTATGAAAAATCGATCACATCAGAGCGTTTCCGGGGGCGAATCCACTTTGAGTTTCGATAAATGC  
ATTGCTTGTGAAGTATGCGTTCGTGTATGCCCGATAGATCTCCCGTTGTTGATTGGAGATTGAAACAGATATTAGAAA  
AAAACGATTGCTTAATTATAGTATTGATTTTTGGAATCTGTATATTTTGTGGTAACTGCGTCGAGTATTGCCCCACAACT  
GTTTATCCATGACTGAAGAATATGAACTTTCCACCTATGATCGTCACGAATTGAATTATAATCAAATTGCTTTGGGTCGG  
TTACCAATACCTGTAGTTGGAGATTACACAATTCAAACAATTATGAATTCGAATCAAACAAAAATAGCTATGAATAAACC  
CCTTGATTCAAGAACAATTACCAATTACTAG-----  
-----ATGCAG---

GGTCGTTTATCTGCTTGGCTAGTCAAGCATGAGCTAGTTCATAGATCTTTGGGCTTCGATTACCAAGGAATAGAACTTT  
ACAAATTAATCCGAAGATTGGTACTCCATTGCTGTCAATTCATATGTATATGGTTACAATTACCTACGTTCTCAGTGTG  
CTTATGATGTAGCACCAGGAGGATTATTAGCTAGTGTGTATCATCTTACGAGAATACAATATGGTGTG---  
GATCAACCAGAAGAGGTATGTATAAAAGTATTTGCCCAAAGGAGGAATCCTAGAATCCCGTCTGTTTTCTGGATCTGGAA  
AAGTTCTGATTTTTCAAGAACGGGAATCTTATGATATGTTGGGAATCTATTATGATAACCACCCACGCCTGAAACGTATCT  
TGATGCCTGAAAGTTGGATTGGTTGGCCCTACGCAAGGATTATATTGCCCTAATTTCTATGAGATACAGGATGCTCAT  
TGAATGGGCCATGAGTTTCGATGTATTGGGCGTATCCGTATTTATAGAAGCTTTAATTTTCGTGCTTATCCCAATCGTTG  
GTTTCAGTTTATGCATGGCGAAAAGGAGCATTGGAATGGTCTTAGCTCCTGAATATTCA---GACGATAAAAAA-----  
GAAGGAAA---GATTCCATTGAGACAGTTTATGAATTCTATG---  
GAGTTTCCGTTACTTGACCGAACAACCCCAAATTCAGTTATTTCA-----  
ACTACACCGAATGATCTTTCGAATTGGTCAAGACTCTCCAGTTTATGGCCGCTTCTATATGGTACCAGTTGCTGCTTCAT  
TGAATTTGCTTCATTAATTGGCTCGCGATTGACTTTGATCGTTATGGACTGGTACCAAGATCGAGTCTTAGGCAAGCCG  
ACCTTATTTAACAGCCGGCAGAGTACAATGAAAATGGCTCCTTCTTTAGTAAGATTATATGAACAAATGCCTGAACCA  
AAATATGTCATTGCTATGGGAGCCTGTACTATTACAGGAGGAATGTTGAGTACCGATTCTTATAGTACC---  
GTTTCGAGGAGTCGATAAGTTAATTCCTGTGGATGTCTATTTGCCGGGTTGCCACCTAAACCAGAAGCAATTATAGACGC  
TATAACGAAACTTCGTAAGAAGGTATCTCGAGAAATCTATGAAGAT---AGAATCGCGTCC-----CAACAGGAA-  
-----GATCGATGTTTTACT-----ACCAATCACAAGTTTCGGGTT-----  
GGGCGCAGTATTCATACCGGAAATTACGATCAAGAGTTACTCTACCAA-----  
-----TCGCCATCT-----ACTTCAGAGATA---CTTTCT----  
--GAAACA-----CTTTTCAAATACAAG---AGTTCACTATCTTCT-----CACGAATTAGTGAATTAG-----  
-----ATGCAA---

AATAGAAATACTTTTTCTTGGGTAAAGGAACAGATGACTCGATCC-----  
ATTTTTGTATCGATGATG-----ATATATATAATA---  
ACTCGGCATCTATTTCAAATGCATATCCTATTTTTGCGCAGCAGGGTTATGAAAATCCGCGAGAAGCAACTGGACGTAT  
TGTATGTGCCAATTGTCATTTAGCTAATAAGCCTGTGGATATTGAGGTTCCACAAGCTGTGCTTCTGATACTGTATTTG  
AAGCAGTTGTTAGAATCCCCTATGATATGCAACTGAAACAAGTTCTTGCTAATGGTAAAAAGGGAGGTTTGAATGTAGGA  
GCTGTTCTCATTTTACCCGATGGATTTGAATTAGCTCCTCCT---  
GATCGTATTTCTCCCGCATGAAAGAAAAGATAGGT---AATTTATCT---TTCCAGAGT---  
TATCGCCCCACTAAAAAAAATATTCTTGTGATAGGTCTGTTCTCGGTCAGAAATATAATGAAATTCTCTTTCCAATCCT  
TTCC

Arabidopsis CTTTTTGGAAATATTTATA---  
GCATACTGTTTATATAAGCCTTTTTTATTCATCTTTATTAATTTAACCTTACTTAATTCATTTCAA-----  
AAATGGAATTCTAAA---CGA-----  
ATTCATTGGGAAAACTAATAAATTTTGTATATAATTGGTCAATATAATCGTGGTTACATAGATTCTTTTTTTAAAACATC  
TTTAATTGAAAGTATAAGAAGATTAGCAAAACAAACGACTTTTTTTGATAAACGAATCATTGATGGAATTACAAATGGAG  
TAGGTATTACAAGTTTCTTTGTAGGAGAAGTAACAAAATATATAGGTGGAAGTCGCATCTCTTCTTATCTGTTCTTATAT  
TTGTCCTATGTATTGATTTTTTTAATGATCCTCTTTTTTTTTTATTTTGAAAAATTCTAA-----  
-----

ATGGATTTGCCTGGACCAATACATGATTTTTCTTTTAGTTTTCTGGGATCCGGTCTTCTAGTAGGGGGTCTGGGAGTGGT  
ATTACTTCCCAACCCAATATTTTTCAGCCTTTTCTTAGGATTTGTTCTT---GTTTGTATATCTTTA---  
TTGTATATTCTATCAAATCCCATTTTGTAGCTGCTGCACAACCTTATTTATGTGGGGGCCATAAATGTTTTAATCAT  
ATTTGCTGTGATGTTTATGAATGATTGAGAATATTCACAGATTTCAATCTG-----  
TGGACCATTGGGAATGGGATTACTTCGTTGGTTTGTACAACCTATTCTTTTTTTATTAATGTCTACTATTCTCGATACGTC  
ATGGTACGGGGTTATTTGGACTACAAAATTAACCAGATTCTAGAGCAAGATTTAATAAGTAATAGTCAACAAATAGGAA  
TTCATTTATCAACAGATTTTTTTCTGCCATTTGAACTCATTTCATAAATCTTTTTAGTTGCTTTGATAGGTGCAATTTCT  
GTGGCTCGTCAATA-----  
-----ATGAAG-----  
AGACCAGTTACAGGAAAAGATCTTATGATAGTCAATATGGGACCTCACCACCCATCCATGCATGGTGTCTTTCGCTTAAT  
TGTTACTCTAGATGGTGAGGATGTTGTTGACTGTGAACCCATATTAGGTTATTTACACAGAGGAATGAAAAAATTGCAG

AAAACCGAGCAATTATACAATATTTACCGTATGTAACGCGATGGGATTATTTAGCTACTATGTTTACAGAAGCAATAACA  
GTAAATGGACCAGAACAATTGGGAAATATTCAAGTTCCTAAAAGGGCCAGCTATATCAGAGTAATTATGCTGGAATTGAG  
TCGTATAGCTTCTCATCTGTTATGGCTCGGCCCTTTTATGGCAGATATTGGTGCACAGACTCCCTTTTTCTATATTTTCA  
GAGAACGAGAATTTGTATATGATCTATTTCGAAGCTGCCACCGGTATGAGAATGATGCATAATTTTTTTTCGTATTGGAGGA  
ATAGCGGCTGATTTACCTTATGGTTGGATAGATAAATGCTTGGATTTTTGTGATTATTTTTTAACAGAGGTTGTTGAATA  
TCAAAAACCTCATTACACGAAATCCTATTTTTTTTAGAACGGGTTGAAGGAGTTGGGATTATTGGTGGGGAAGAAGCAATAA  
ATTGGGGTTTATCCGGACCAATGCTACGCGCATCCGGAATACCATGGGATCTTCGTAAAATTGATCGTTATGAGTCTTAC  
GATGAATTTGAATGGGAAATTCATGGCAAAAACAAGGAGATTATTAGCTCGTTATTTAGTACGACTTAGCGAAATGAC  
AGAATCCATAAAAAATTTCAACAGGCTCTGGAAGGACTTCCAGGGGGTCCCTATGAGAATTTAGAAAAGCAGGGGCTTTG  
AT-----AGAAAA---  
AGGAATCCAGAATGGAATGATTTTTGAATATCGATTATTAGTAAAAAACCTTCTCCTACTTTTTGAATTATCAAAAACAAGA  
ACTTTATGTAAGAGTTGAAGCTCCAAAAGGGGAGTTGGGAATTTTTCTCATAGGAGATCAAAGCGGTTTTCTTGGAGAT  
GGAAAATACGACCACCGGTTTTTATTAATTTGCAAATTTCTTCTGAAGTAAAGAAATGAAATTTGGCTGATATTATG  
ACGATACTCGGTAGCATAGATATAATTATGGGAGAAGTTGATCGTTAAATGCTTCCCTATGATAACCGGGTTCATGAATTA  
TGGTCAACAAACCCTACGAGCTGCAAGGTATATTGGTCAAGGTTTCATGATTACCTTATCCACACAAAATCGTTTTACCTG  
TAACTATTCAATATCCCTATGAAAAATTAATAACATCGGAACGTTTCCGCGGTGCAATCCATTTTTGAATTTGATAAATGC  
ATTGCTTGTGAAGTATGTGTTTCGAGTATGTCCTATAGATTTGCCTGTTGTTGATTGGAAATTTGGAACTAATATTCGAAA  
AAAACGATTGCTTAATTACAGTATTGATTTTTGGAATTTGTATATTTTGTGGTAATTGTGTTGAGTATTGTCCAACAAAT  
GTTTGTCAATGACTGAAGAATATGAATTTCCACTTATGATCGTCACGAATTGAATTATAATCAAATAGCTTTGGGTCGT  
TTACCAATGTCAGTAATTGACGATTACACTATTCGAACAATTTGGAATTCACCTCAAACAAAAAAT---  
GGGGTAAACCCTTTAATTTGA-----  
-----ATGCAG---  
GGCACTTTGTCCGTTTGGCTAGCCAAACGCGGGCTGGTTCATAGATCGTTGGGCTTCGATTATCAAGGAATAGAGACTTT  
ACAAATAAAGCCCAGGATTGGCATTCTATTGCTGTAATTTTATATGTATATGGTTACAATTATTTACGTTTCGCAATGTG  
CCTATGATGTGGCACCAGGTGGCCTCTTAGCCAGCGTGTATCATCTTACGAGAATAGAATATGGTGT---  
AATCAAGCGGAAGAAGTCTGCATAAAAGTATTTACTCACAGGAGTAATCCTAGAATCCATCCGTTTTCTGGGTTTGGAA  
AAGTACGGATTTTCAAGAACGGGAATCTTATGATATGTTAGGAATCATTATGATAGCCATCCACGACTGAAACGGATCC  
TAATGCCCAGAGTGGATAGGGTGGCCTTTACGTAAGGATTATATTGCCCCCAATTTTTTATGAAATACAAGATGCTTAT  
TGA-----  
-----ATGAATTCCATT---  
AAGTTTCCATACTTGATCGAACAACAAAAAATTCGTTATTTCA-----  
ACTACGTTAAATGATCTTTCAAATTTGGTCAAGACTTTCCAGCCTATGGCCGCTTCTTTATGGTACCAGTTGTTGTTTCAT  
TGAATTTGCCTCATTAAATAGGCTCCCGATTTGACTTTGATCGTTATGGGTTAGTACCAAGATCGAGTCTTAGACAGGCGG  
ACCTTATTTTAAACAGCAGGTACAGTAACAATGAAAATGGCTCCTTCTTTAGTGCAGATTATATGAACAAATGCCTGAACCG  
AAGTATGTTATTGCTATGGGAGCCTGTACAATTACAGGGGGATGTTTCAGTACCGATTCTTATAGTACT---  
GTTTCGAGGAGTTGATAAGCTAATTCCTGTAGATGTCTATTTGCCGGGTTGTCCACCTAAACCAGAGGCTGTTATAGACGC  
TATAACAAAGCTTCGTAAGAAAATAGCTAGAGAAATCTATAAGGAT---CGAATTAGACCT-----CAACAGGGT-  
-----AATCGGTGTTTTACT-----ACCAATCACAAGTTTTTTGTT-----  
GTACGCAGTCCGCATATTGGAAATTTATGATCAAGAACTACTCTATCCA-----  
-----CCATCATCT-----ACTTCAGAGATC---TCTACT-----  
--GAAACA-----TTTTTTAAATACAAA---AGTCCAGTATCGTCC-----CACGAATTAGTGAATTAG-----  
-----ATGCAA---  
ACTAGAAATACCTTTTCTTGGATAAGGGAAGAGATTACTCGCTCC-----  
ATATCTGTCTCACTCATA-----ATATATATAATA---  
ACTTGGGCATCCATTTCAAGTGCATATCCGATTTTTGCCAGCAGAATTATGAAAATCCACGAGAGGCGACTGGGCGTAT  
TGTATGTGCCAATTGCCATTTAGCTAATAAGCCCGTGGATATTGAGGTTCCACAAACGGTACTTCTGATACTGTATTTG  
AAGCAGTTGTTAAAATTCCTTATGATATGCAACTAAAACAAGTTCTAGCTAATGGTAAAAAAGGGGCTTTGAATGTGGGA  
GCTGTTCTTATTTTACCGGAGGGTTTTGAATTAGCCCCCCCC---  
GATCGTATTTACCCGAGATGAAAGAAAAGATAGGA---AATCTTTCT---TTTCAGAAT---  
TATCGTCCCAATAAAAAAATATTCTTGTGATAGGTCCTGTTTCTGGTCAAAAATATAGTGAATAACCTTTTCTATTCT  
TGCTC  
Atropa TTATTTTCGGAATATTTTTTA---  
GCATCCTTTTTATATAAACCTATTTATTCTTCTTTAAAAAATTTTGGATTAATTAATTCTTTTTGTT-----  
AAAAAGGGCCCTAAG---AGA-----  
ATTCTGTGGGACAAAATTTCAATGGCATATATGATTGGTCAATAATCGTGCTTACATAGATGCTTTTTTATACAAGATT  
CTTTGTTGGTGGGATAAGAGGATTAGCTGAATTTATTCAATTTTTTTGATCGACGAGTAATTGATGGGATGACTAACGGGG

TTGGGGTTATTAGTTTCATTGTAGGAGAAGGTATCAAATATATAGGGGGCGGACGCATCTCTTCTTATCTTTTCTTATAT  
TTAGCTTATGTTTTAGTCTTTTTTATTAGTTTATTACTTATTCTTTTTGACTTTTTGA-----

ATGGATTTATCTGAACCAATACATGATTTTTCTTTTAGTCTTTCTAGGATCGGGTCTTATATTAGGGGGTCTAGGGGTGGT  
ATTACTTCCCAATCCAATTTATTCTGCCTTTTCTTTGGGATTGGTTCTT---GTTTGTACATCGTTA---  
TTCTATATTCTATCTAACTCCTATTTTTGTAGCTGCTGCGCAGCTACTTATTTACGTAGGAGCTATAAATGTTTTAATCAT  
TTTTGCTGTGATGTTTCATGAATGGTTCAGAATATTACAAAGATTTTCATCTT-----  
TGGACCGTAGGAGATGGAATTACTTCGATGGTGTGATAAGTCTTTTTATTTCACTAATTACTACTATTTTTCAGATACTTC  
ATGGTACGGGATTATTTGGACTACAAGATCAAACCAGATTATAGAGCAAGATTTTCTAAGTAATAGTCAACAAATTGGAA  
TTCATTTATCAACAGATTTTTTCTTCCATTTGAACTAATTTCAATAATCCTTTTAGATGCTTTAATAGGTGCAATTGCT  
GTAGCTCGTCAATA-----

-----ATGACT-----

ACACCAACTACAAGAAAAGACCTCATGATAGTCAATATGGGGCCTCAGCACCCATCAATGCACGGCGTTCTTCGACTCAT  
CGTTACTCTAGATGGTGAAGATGTTGTGCGACTGCGAACCAATATTGGGTTATTTACATAGAGGGATGGAGAAAATTGCGG  
AAAATCGAACAAATTATCCAATATTTGCCTTATGTAACACGTTGGGATTATTTAGCTACTATGTTTACAGAAGCAATAACC  
ATAAATGGACCCGAACAATTAGGCAATATTCAAGTACCTAAAAGAGCTAGCTATATCAGAGTCATTATGTTGGAGTTGAG  
TCGGATAGCTTCTCATTGTTATGGCTCGTCTTTTTATGGCGGATATTGGTGCAGACCCCTTTCTTCTATATTTTTTC  
GAGAAAGAGAATTAATATATGACCTCTTGAAGCTGCCACCGGTATGCGAATGATGCATAAATTATTTTCGTATCGGAGGG  
GTGGCTGCCGATCTACCCTATGGATGGATAGATAAATGTTTGGATTTTTGCGATTATTTTTAACGGGGATTGCTGAGTA  
TCAAAAACCTTATTACCCGGAATCCTATTTTTTAGAACGAGTTGAAGGCGTAGGCATTATTGGGGGAGACGAAGCATTAA  
ATTGGGGTTTATCGGGACCAATGCTACGAGCTTCCGGAATAGAATGGGATCTTCGTAAAGTTGATCATTATGAGTCTTAC  
GACGAATTTGATTGGCAGGTTCAATGGCAACGAGAAGGGGATTATTAGCTCGTTATTTAGTACGAATCGGTGAAATGAC  
CGAATCCATAAAGATTATTCAACAGGCTCTGGAAGGAATTCAGGAGGGCCTTACGAAAATTTAGAAATACGACGTTTTG  
AC-----AGATTA---

AAAGATCCTGAATGGAATGATTTTTGAATATCGGTTTATTAGTAAAAAACCTTCTCCAACCTTTTGAATTGTGAAACAAGA  
ACTTTATGTGAGAGTTGAAGCCCCAAAAGGAGAATTGGGAATTTTTCTCATAGGAGATCAGAGCGTTTTTCTTGGAGAT  
GGAAAATCGCCCACCAGGTTTTATCAATTTGCAAATCTTCTCAGTTAGTTAAAAGAATGAAATGGCTGATATTATG  
ACAATACTAGGTAGCATAGATATCATTATGGGAGAAGTTGATCGTTGAATGCTCCCTATGATAACTGAATTCATAAATTA  
TGTTCAACAACAATACGAGCCGAGATATATCGGCCAAGGTTTCATGATTACCCTGTCCCACGCAATCGTTTTACCTG  
TAACTATTCAATACCCTACGAAAAATTGATCACATCGGAACGTTTTCCGGGGCCGAATACACTTTGAATTTGATAAATGT  
ATTGCTTGTGAAGTATGTGTGCGTGTATGTCCTATAGATTTACCCGTTGTTGATTGGAAGTTGGAAACCGATATTGAAA  
GAAACGGTTGCTTAATTACAGTATTGATTTTTGGAATCTGTATATTTTTGTGGTAATTGCGTTGAGTATTGCCCAACAAT  
GTTTATCAATGACCGAAGAATATGAACTTTCTACTTATGATCGTCACGAATTGAATTATAATCAAATCGCTTTGGGTGCG  
TTACCAATGTCAGTAATTGATGATTACACAATTCGAACAATTTGAAATTTACCTCAAATAAAAAATGAATA-----

-----ATGCAG---

GGTCGTTTGTCTGCTTGGCTAGTCAAGCATGGGCTAATTCATAGATCTTTGGGCTTTGATTACCAAGGAATAGAGACTTT  
ACAAATAAAGCCCAGGATTGGCATTCCATTGCTGTCAATTTTTTATGTATATGGGTACAATTATCTCCGCTCTCAATGTG  
CCTATGATGTAGCGCCTGGCGGGCTGTTAGCTAGTGTGTATCATCTTACGAGAATAGAGGATGGTGTG---  
GATCAACCAGAAGAGGTATGCATAAAAGTATTTGCCTCCAGGAGGAATCCTAGAATTCGGTCTGTTTTCTGGGTTTGGAA  
AAGTGTGGATTTTTCAAGAACGAGAATCATATGATATGTTGGGAATCTCTTATGATAATCATCCACGCTTGAAACGTATCT  
TAATGCCTGAAAGTTGGATAGGATGGCCCTTACGTAAGGATTATATTGCCCCCAATTTTTATGAAATACAAGATGCTCAT  
TGAATGGGCAATGAGTTTCGACGATTGGGTGTATCTGTATTTATAGAAGCTTTCATTTTCGTGCTGATCTTAATTATTG  
GTTTAGTTTATGCATGGCGAAAGGGGCATTGGAATGGTCTTAGCTCCTGAATATTCA---GACAATAAAAAAGAAA---  
AACGGAAAA---AATAAGATTGAGACAGTTATGAATTCATT---

CAGTTTTCTTTACTTGATCGAACAGCCCAAAATTCAGTTATTTCA-----

ACTACATTAATGATCTTTCAAATTTGGTCAAGACTCTCTAGTTTTATGGCCGCTTCTCTATGGTACCAGTTGTTGCTTCAT  
TGAATTTGCTTCACTAATAGGCTCACGCTTCGACTTTGATCGTTATGGACTAGTACCAAGATCGAGTCTTAGACAAGCGG  
ATCTAATTTTAAACAGCCGGAACAGTAACAATGAAAATGGCCCCCTTTTAGTGAGATTATATGAGCAAATGCCTGAACCA  
AAATATGTGATTGCTATGGGAGCCTGTACAATTACAGGCGGGATGTTTCAGTACCGATTCTTATAGTACT---  
GTTCCGGGAGTCGATAAGCTAATTCCTGTAGATGTCTATTTGCCAGGTTGCCACCTAAACCGGAAGCAGTTATAGATGC  
TATAACAAAGCTTCGTAAGAAAATATCTCGAGAACTCTATGAAGAT---CGAATTAGGTCT-----CAACGAGTG-  
-----AATCGGTGTTTTACT-----ACCAATCACAAGTTTCATGTT-----

CGACGCAGTATTCATACGGGAAATTTATGATCAAAGAGTTCTTTATCAA-----

-----CCACCATCT-----ACTTCAGAGATC---CCTACG----

--GAAATC-----TTTTTCAAATACAAA---AATTCAGTATCTTCC-----CCCGAATTAGTGAATTAG-----

-----ATGCAA---



-----ATGCAA-----  
ACTAGAAATACCTTTTTTTGGATAAAGGAACAGATGACTCGATCC-----  
ATTTCCGTATCGATCATA-----GTATATGTAATA---  
ACTCAGACATCCATTTCAAATGCATATCCATTTTTGCACAGCAGGGTTATGAAAATCCACGAGAAGCGACTGGGCGTAT  
TGTATGTGCCAATTGCCATTTAGCTAATAAGCCCTTGGATATTGAGGTTCCACAAGCGGTACTIONCCCGATACTGTATTTG  
AAGCGTTTGTAGAAATCCCTTATGATATGCAACTGAAACAAGTTCTTGCTAATGGCAAAAAGGGAGCTTTGAATGTAGGG  
GCTGTTCTTATTTTACCCGAGGGATTGCAATTAGCTCCCCC---  
GATCGTATTTCTCCCGAGATGAAAGAAAAGATAGGA---AATCTGTCT---TTTCAGAGC---  
TATCGCCCCACTAAAAAAATATTCTTGTGATAGGTCCTGTTCTGGTCAGAAATATAGTGAAATCACCTTTTCTATTCT  
TTCC  
Calycanthus CTGTTTCGGAATATTCATA---  
GCATCTCTTTTCTATGGATCTATTTATTCATCTTTTCAGAATTTGGATTTTCATCAATTCATTTGTT---  
AAAAAACC GGGCTCTAAG---AGA-----  
ATTTTCTTGGATAGAATAATAAATGTGATATACAATTGGTCATATAATCGGGGTTACATAGATGTTTTTTATACAACATG  
TTTTACTAAAGGTATAAGAGGATTGGCCGAACCTAATCTTTTGGATAGACGACTAATTGACCGAATTGCTAATGGTA  
TTGGTATGGCAAGTTTTTTTGTAGGAGAAGGGATCAAATATGTGGGGGGGGGGCGAATATCATCTTATCTCTTCGTGAT  
TTATCTTATGTATCAATCTTGTATTAAATTTACTATTTCTATTTTTTCTTTTTTCTTTTTTTGA-----  
-----  
ATGGATTTACCTGGACCAATACATGATATTCTTTTAGTATTTCTAGGATTAGGTCTTATATTGGGAGGTCTGGGAGTGGT  
ATTACTTACCAATCCAATTTATTCTGCCTTTTCGTTGGGATTGGTTCTT---GTTTGTATATCCTTA---  
TTTTCATATCCATCTAATCTTATTTTGTAGCTGCTGCACAGCTCCTTATTTATGTGGGAGCGGTAATGTTTTAATCGT  
ATTTGCTGTGATGTTTCATGAATGGTTTCAGAATATTTCCAACGATTTCCATCTT-----  
TGGACCGTTGGAGATGGAGTCACCTCATTGGTTTGTACAAGTATTCTTTTTTACTAATTACTACTATTTGGAATACGTC  
ATGGTACGGGATTATTTGGACTACAAGATCAAACCAGATTATAGAGCAGGACCTAACAAGTAACGTTCAACAAATTGGTA  
TTCGTTTAGCAACTGATTTTTATCTTCCATTTGAACTCATTCTATAATTCTTTTAGCTGCTTTGATAGGTGCAATTGCT  
ATGGCTCGTCAGTAA-----  
-----ATGAAT-----  
GTACCGGCTACAAGAAAAGACCTCATGATAGTCAATATGGGTCCTCACCACCCTCAATGCATGGTGTCTTTCGACTCAT  
CGTTACTCTAGATGGTGAAGATGTTATTGACTGCGAACCTGTATTGGGTTATTTACACAGAGGAATGGAAAAAATTGCAG  
AAAACCGAACAATTATACAATATCTGCCTTATGTAACACGTTGGGATTATTTAGCCACTATGTTTACAGAAGCAATAACA  
GTAAATGCACCAGAACAATTAGGAAATATTCAAGTACCTAAAAGAGCTAGCTATATCAGAGTAATCATGCTGGAGCTGAG  
TCGTATAGCTTCTCATTGTTATGGCTTGGACCTTTTATGGCGGATATCGGTGCACAGACTCCTTTCTTCTATATTTTCA  
GAGAAAGGGAATTGCTATATGATCTATTTGAAGCTGCCACAGGTATGCGAATGATGCATAATTATTTCCGTATCGGAGGA  
GTAGCTGCTGATCTACCTCATGGCTGGATAGATAAATGTTTAGATTTCTGCGATTATTTTTTAAACGGGAGTTGTTGAATA  
TCAAAAGCTTATTACGCGGAATCCCATTTTTTTTGGAACGAGTTGAAGGGGTGGGCATTATTGGTGGGGAGGAAGCAATAA  
ATTGGGGTTTATCGGGACCAATGCTACGAGCTTCCGGAATCCAATGGGATCTTCGTAAAGTGGATCATTATGAGTGTTAC  
GACGAATTCGATTGGCAAGTGAATGGCAAAAAGAAGGAGACTCATTAGCTCGTTATTTAGTACGAATCAGTGAATGAC  
AGAATCTATAAAAAATCTTCAACAAGCTCTGGAAGGAATTCGGGAGGGCCCTATGAGAATTTAGAAGGTCGACGCTTTG  
AT-----AGAGAA---  
AGTGATTCGGAATGGAATGATTTTTGACTATCGATTATTAGTAAAAAGCCTTCTCCACTTTTTGAATTGTCGAAACAAGA  
ACTTTATGTGAGAGTAGAAGCTCCAAGGGGAGAATTGGGAATTTTTCTGATAGGAGATAATAGTGTTTTTCCCTGGAGAT  
GGAAAATTCGTCCGCCAGGTTTCATCAATTTGCAAATTTCTCTCACCTAGTTAAAAGAATGAAATTTGGCTGATATCATG  
ACGATACTAGGTAGTATAGATATCATTATGGGGGAAGTTGATCGTTGAATGTTCCCTATGGTAACTGGGTTTCATGAATTA  
TGGTCAACAAACGGTACGAGCCGCAAGGTACATTGGTCAAAGTTTCATGATTACTTTATCTCACGCGAATCGTTTTACCTG  
TAATATTCAATATCCTTATGAAAAATCGATCACATCAGAGCGTTTTCTGTTGTTAGAATCCACTTTGAATTTGATAAATGC  
ATTGCTTGTGAAGTATGTGTTCCGGTATGCCCATAGATTTACCCGTTGTTTATTGGAGATTGGAAACAGATATTAGAAA  
GAAACGATTGCTTAATTATAGTATTGATTTCCGGAATCTGTATATTTTGTGGGAAGTGTGTCGAGTATTGTCCAACAACT  
GTTTATCAATGACTGAAGAATATGAACCTTCTGCTTATAATCGTCACGAATTGAATTATAATCAAATTTGCTTTGGGTCGG  
TTACCGATGTCAGTAATTGAAGATTACACAATTCGAACAACCTAGGAATTTCTACTCAAATAAAAAATAGCCATGGATAAACC  
TCTTAATGCAAGAACGGTTACAAATTTCTAA-----



-----ATGCAG---  
GGTCGTTTATCTGCTTGGCTAGTCAAGCACGGGCTAGTTCATAGATCTTTGGGCTTCGATTACCAAGGAATAGAGACTTT  
ACAAATAAAGCCCCGAGGATTGGTACTCCATTGCTGTCAATTCATATGTATATGGTTATAATTATCTACGTTTCCAGTGTG  
CCTATGATGTAGCGCCTGGCGGATTGTTAGCTAGTGTGATTATCTTACAAGAATACAGTATGGTGTG---  
GATCAACCCGAAGAGGTCTGCATAAAAAGTATTTGCCCAAGGAGGAATCCTAAAATCCCGTCTGTTTTCTGGATTTGGAA  
AAGTGCAGGATTTTCAAGAACGAGAATCTTATGATATGTTGGGGATCTCTTATGAAAATCATCCACGCCTGAAACGTATCT  
TGATGCCCGAAAGTTGGATAGGATGGCCTCTACGTAAGGATTATATTGCCCCCAATTTCTATGAAATACAAGATGCTCAT  
TGA-----  
-----ATGGTCTTAGCTCCTAAATATTCA---  
GATAATCAAAAATCAAAAAGAAGGAAAA---GATTCCATTGAGACAGTTATGAATTCGACT---  
GAGTTTCCATTACTTGACCGAACAACCCAAAATTCGTTATTTTCA-----  
ACTACATTGAATGATCTTTTCAAAATGGTCAAGACTTTCTAGTTTATGGCCGCTTCTTTATGGTACGAGTTGTTGCTTCAT  
TGAGTTTGCTTTCATTAATAGGCTCGCGATTTCGATTTTATGATCGTTATGGACTAGTACCAAGATCGAGTCTAGGCAAGCGG  
ACCTAATTTTAAACAGCTGGCACAGTAACAATGAAAATGGCCCTTCTTTAGTGAGATTATATGAGCAAATGCCTGAACCA  
AAATATGTCATTGCTATGGGGCCTGTACTATTACAGGAGGGATGTTTCAGTACCGATTCTTATAGTACC---  
GTTTCGAGGAGTCGATAAGCTAATTCCTGTGGATGTCTATTTGCCGGGCTGCCACCTAAACCAGAGGCAGTTATAGATGC  
TATAACGAAACTTCGTAAGAAAGTATCTCGAGAAATCTATCAAGAT---AGAATTGGGTCT-----CAACAGGAA-  
-----AATAGATGTTTTACT-----ACCAATCACAAGTTTCATATT-----  
GAACGCAGTACTCATACTGGAAATTACGGTCAAGGATTACTCTACCAA-----  
-----TCTCCATCT-----ACTTCAGAAATA---CCTTCT-----  
--GAAACA-----TTTTTCAAATACAAA---AGTTCAGTATCTTCC-----CACGAATTAATGAATTAG-----  
-----ATGCAA---  
AATAGAAATACCTTTTCTTGGGTAAAGGAAGAGATGACTCGATT-----  
ATTTCCGTATCGATCATG-----ATATATGTAATA---  
ACTCGGACATCTATTTCAAACGCATATCCCATTTTTGCGCAGCAGGGTTATGAAAATCCACGAGAAGCAACTGGGCGTAT  
TGTATGTGCCAATTGCCATTTAGCTAATAAGCCCGTGGATATTGAGGTTCCACAAGCCGTGCTTCTGATACTGTATTTG  
AAGCAGTTGTTTCGAATCCCTTATGATATGCAACTGAAACAAGTTCTTGCTAATGGTAAAAAGGGGGCTTTGAATGTGGGG  
GCTGTCTCTTATTTTACCCGAGGGATTTCGAATTAGCTCCCCC---  
GATCGATTTTCTCCCGAGCTGAAAGAAAAGATGGGC---AATCTGTCT---TTTCAGAGT---  
TATCGCCCAATAAAAAGAAATATTCTTGTGGTAGGTCTGTTCTGCTGAGAAATATAGTGAATTTGTCTTTCCATTCT  
TTCC  
Ceratophyllum GGTTTTCGGAATATTACA---  
GCATCCCTTTTATATGGTTCTGTCTATTCATCTTTCAAAAATATGGAATTAATAAATTCCGTTGTA-----  
AAAATAAGTCCTAAA---AGA-----  
AGTTTATTGGATCGAATAATAAATGTGATATACAATTGGTCATGTAATCGCGGTTACATAGATGTTTTTTATGCAAGGTC  
CTTAATGATGATAAGGGGATTAGCCCAACTGACTCATTTTTTTGATAGACGAGTGATTGATGGAATTACAAATGGGT  
TTGGTATTGTAAGTTTCTTTGTAGGAGAAGGGATCAAATATGCGGGGGCGGAAGAATTTCTTCTTATATCTTTTATTAT  
TCATCTTATGTATTAATCTTTGTATTAATTTTCTATTTTTTTCATTTGA-----  
-----  
ATGGATTTACCTGGACCAATACATGATATTCTTTTAGTATTTCTGGGATCAGGTCTTATATTAGGCGGTTTAGGAGTGGT  
ATTATTTACCACTCCCATTTATTCTGCCTTTTCTTTGGGATTGGTTTTT---GTTTGTATATCCTTA---  
TTCTATATTCCATCGAACTCCTATTTTGTAGCTGCTGCACAGCTCCTTATTTACGTGGGAGCCGTAATGTGTTAATCGT  
ATTTGCTGTGATGTTTCATGAATGGGTGAGAATATTACAAAGATTTTCATCTT-----  
TGGACCGTTGGAGATGGGATCACTTCATTGGTTTGTACAAGTATTCTTTTTTCACTAATTACCACTATCCTAGAGACGTC  
GTGGTACGGGATCATTGGACGACAAGATCAAACCAGATTATAGAACAAGACCTAACAAGTAACGTTCAACAAATGGGGA  
TTCATCTATCAACAGATTTTATCTTCCATTTCGAACTCACTTCTATAATTCTTTTAGTTGCCCTGATAGGTGCAATTGCT  
ATGGCTCGTCAGTAA-----  
-----ATGACT-----  
GTACCGGATAAAAAGAAAAGACCTCATGATAGTCAATATGGGTCTCAGCACCCATCCATGCATGGTGTCTTTCGACTCAT  
TGTCACTTTAGATGGTGAAGATGTTATTGACTGTGAACCCGATTGGGTTATTTACACAGAGGAATGGAAAAAATTGCGG  
AAAACCGAACAATTATACAATATCTGCCCTATGTAACACGTTGGGATTATTTAGCCACTATGTTTCACAGAAGCAATAACG  
GTAAATGCACCAGAACAGTTGGGAAATATTCAAGTGCCTAAAAGAGCAAGCTATATTCGAGTCAATTATGCTAGAGTTGAG  
TCGTATAGCTTCTCATTTGTTATGGCTTGGTCTTTTATGGCGGATATCGGTGCACAGACTCCTTTCTTTTATATTTTCC  
GAGAGAGAGAATTGATATATGATTTGTTTGAAGCTGCTACCGGTATGCGAATGATGCATAATTTTTTTTCGTATCGGAGGT  
GTAGCTGCCGATCTACCTCATGGATGGATAGATAAATGTTTGGATTTCTGCGACTACTTTTTAACAGGAGTTGTTGAATA  
TCAAAGCTTATTACACGTAATCCCATCTTTTGGAACTGTTGAAGGAGTAGGCATTATTGGTGGAGAAGAAGCAATAA  
ATTGGGGTTTATCAGGACCGATGTTACGAGCTTCAGGAATCCCATGGGATCTTCGTAAAGTGGATCATTACGAGTCTTAC

GATGAATTCGATTGGGAAATTC AATGGCAAAAAGAAGGAGATTC ACTAGCCCGTTATTTAGTACGAATTAATGAAATGAT  
AGAATCGATAAAAATAATTC AACAGGTCTTGGAAGGAATCCCGGGGGGCCCTTATGAGAATTTAGAAGTACGTCGTTTTG  
CG-----AGACCA---  
AAAGATTCCGAATGGAATGATTTTGAATATCGATT CATTAGTAAAAAACCTTCTCCTAGTTTTGAATTGTCAAAAACAAGA  
ACTTTATGTAAGAGTAGAAGCTCCAAAAGGGGAATTAGGGGTTTTCTGATAGGAGATAATAGTGTTTTTCCCTGGAGAT  
GGAAAATCCGTCACC CGGGGTTTTATAAATTTGCAAATTTCTCCTCAGCTAGTTAAAAGAATGAAATTTGGCGGATATCATG  
ACGATACTAGGTAGTATAGATATCATTATGGGAGAAGTTGATCGTTGAATGTTCCCTATGGTGACTGGGTTTCATGAATTA  
TGGGCAACAAACAATACGAGCTGCAAGGTACATTGGTCAAAGTTTTCATGATTACCTTATCCCACGCGAATCGTTTTACCTA  
TAACTATTCAATATCCTTATGAAAAATCGATTACATCGGAGCGTTTTCCGTGGTTCGAATTCACTTTTGAATTTGATAAATGT  
ATTGCTTGTGAAGTATGTGTTTCGTGTATGTCTATAGACCTGCCGGTTGTTGATTGGAAATTTGGAAACAGATATTAGAAA  
GAAACGATTGCTTAATTATAGTATTGACTTTGGAATCTGTATATTTTGTGGTAATTGTGTTCGAATATTGTCCAACAACT  
GTTTATCAATGACTGAAGAATATGAACTTTCCACTTATGATCGTCACGAATTGAATTATAATCATATTTCTTTGGGTCCG  
TTACCGATGTCAGTAATTGCAGATTACACAATTC AACCCATTATGAATCCGACAAAAATATCCACGGGAGAAGCTCTTTG  
A-----  
-----ATGCAG---  
GGTCGTTTCATCTGCTTGGCTAGTAAAACACGAGCTAGTTCATAGATCTTTGGGCTTTGATTACCAAGGAATAGAGACTTT  
ACAAATAAAAACCCGAGGATTGGTACTCAATTGCTGTCAATTTTCATATGTATATGGTTATAATTATCTACGTTTCACAGTGTG  
CCTATGATGTAGCACCCGGGAGGATTGTTAGCTAGTGTGTATCATCTTACGAGAATACAATACGGTGTG---  
GATCAACCAGAAGAGGTATGCATAAAAGTATTTGCCCAAGGGGAATCCTCGAATCCCGTCTGTTTTCTGGATTTGGAA  
AAGTGCAGGATTTTCAAGAACGAGAATCCTATGATATGTTTGGAAATCTCTTATGATAATCATCCACGCCTGAAACGTATTT  
TGATGCCAGAAAGTTGGATAGGTTGGCCCTACGTAAGGATTATATTGCCCCCGATTTCTATGAAATACAAGATGCTTAT  
TGA-----  
-----GTGGCGAAAAGGAGCATTGGAATGGTCTTAGCTCCTGAATATTCA---GACAATAAAAAA-----  
GAAGGAAAA---GATTACATTGAGACAGTTATGAACTCTATT---  
GAGTTTCCGTTATTTGACCGAACAACAAAAAATTCTGTTATTTCA-----  
ACTACATCGAATGATCTTTTCGAATTGGTCAAGACTCTCCAGTTTATGGCCCCTTCTCTATGGTACCAGTTGTTGCTTCAT  
TGAATTTGCTTCATTAATAGGCTCTCGCTTCGATTTTGTATCGTTATGGGCTGGTACCAAGATCGAGTCTAGACAAGCAG  
ACCTAATTTTAAACAGCCGGCACAATAACAATGAAAAATGGCTCCCTCTTTAGTGAGATTATATGAGCAAATGCCTAAACCA  
AAATATGTCAATTGCAATGGGGCTTGTACTATTACAGGCGGGATGTTTCAGTACCGATTCTTATAGTACT---  
GTTTCGGGGAGTCGATAAGCTAATTCCTGTGGATGTATATTTGCCGGGCTGCCACCTAAACCAGAAGCAGTTATCGATGC  
TATAACCAAACCTTCGTAAAAAAGTATCTAGAGAAATCTATGAAGAT---AGAATCAGTTCT-----CAACAGGAA-  
-----AACCGATGTTTTACT-----ATCAATCACAAGTTTCGTATT-----  
AGACGCAGTACTCATACTGGCAATTACGATCAAGGATTACTCGATCAA-----  
-----TCGCCATCTACATCTACTTCAAGGATACGACCCTCT----  
--GAAAAC-----TTTTTCAAATACAAA--AGTACAGTATTTTCC-----CATGAATTAGTGAATTAA-----  
-----ATGCAA---  
AATAGAAATACCTTTTCTTGGGTAAAGGACCAGATGAGTCGATT-----  
ATTTCTGTATCGATCATG-----ATATATGTAATA---  
ACTCGAACATCCATTTCAAATGCGTATCCCATTTTTGCACAGCAGGGGTATGAAAATCCACGAGAAGCAACTGGTCGTAT  
TGTATGTGCCAATTGCCATTTAGCTAATAAACCCGTGGATATTGAGGTTCCACAGGCGGTGCTTCTGATACTGTATTTG  
AAGCAGTTGTTTCGAATCCCTTATGATATGCAATTGAAACAAGTTCTCGCTAATGGTAAAAAAGGGGGTTGAATGTAGGG  
GCTGTTCTTATTTTACCCGAGGGATTGCAATTAGCCCCCCCC---  
GATCGTATTTCTCCTGAGATGAAAGAAAAGATTGGC---AATCTGTCT---TTTCAGAGT---  
TATCGTCCCAATAAAAAAATATTCTTATAATGGGTCTGTTCTGTTGTAATAATAGTCAAATTTGTCTTTCCATTCT  
TTCC

Chloranthus



CTTAACAGAAGGGATAAGAGGATTAGCGGAACTAACTCATTGTTTCGACAGACGAGTAATTGATGGAATTACGAATGGGG  
TTGGTATTACAAGTTTTTTTTGTAGGGGAAGGTATAAAATATTTAGGGGGAAGTCGCATCTCTTTTTATCTCTTATTATAT  
TTATTTTCGTTATTATTCTTTTTAATATTTCTCTTCTTTTTTTTTCTTTAAATAA-----  
-----

ATGGATTTGCCTGGACCAATACACGATTTTATTTTAGTTTTCTGGGATCGGGTCTTATATTAGGAGGTCTGGGAGTGGT  
ATTATTTACCAACCCAATTTATTCTGCCTTTTCCTTGGGATTGGTTCTT---GTTTGTATATCATT---  
TTCTATATTCTATCAAATTTCCCATTTTGTAGCTGCCGCGCAACTCCTTATTTACGTGGGAGCTGTAAATGTTTTAATCAT  
ATTTGCTGTAATGTTTCATGAACGGCTCAGACTATTCCAAAGATTTTTCAGTTGAATCTTTGGACTATTGGCGATGGTCTTA  
CTTCTCTGGTTTGTACAAGTATTTTTTTTTTCGCTAATCACTACTATTCTCGATACATCGTGGTACGGGATTATTTGGACT  
ACACGAGCCAACCAGATTATTGAACAAGATTTGATAAGTAATAGTCAACAAATTGGAATTCATTTATCAACAGACTTTTT  
TCTTCCATTTGAACTCGTTTCAATAATTCTTTTAGTTGCTTTAATAGGTGCAATTGCCGTGGCGCGTCAATA-----  
-----

ATGAGTATACTAGCTACAGAAAAAGAAAAAGAATTTATGATAGTCAATATGGGACCTCACCACCCGTC AATGCATGGGGT  
TCTTCGTCTCATCGTTACTCTAGACGGTGAAGATGTTATTGACTGTGAACCAATATTGGGTTATTTACACAGAGGGATGG  
AAAAAATTGCGGAAAACCGAACAAATTATACAATATCTGCCTTATGTAACCCGTTGGGATTATTTAGCTACTATGTTTACA  
GAAGCAATAACTGTAAATGGACCAGAACAGTTGGGAAATATTGCGGTACCTAAAAGGGCCAGCTATATCAGAGTAATTAT  
GTTGGAGTTGAGTCGTATAGCTTCCCATCTGTTATGGCTTGGCCCTTTTATGGCAGATATTGGTGCACAGACTCCTTTCT  
TCTATATTTTTCAGAGAAAAGAGAATTAGTATATGATCTGTTTGAAGCTGCCACCGGTATGAGAATGATGCATAAATTATTT  
CGTATCGGAGGAGTAGCAGCTGATTTACCCTATGGTTGGATAGATAAATGTTTGGATTTCTGCGATTATTTTTAACAGG  
GGTTGCTGAATATCAAAAACCTTATTACGCGAAACCCCATTTTTTTAGAACGAGTTGAAGGAGTAGGCATTATTGGTGGAG  
AAGAAGCAATAAATTGGGGTTTATCAGGACCAATGCTACGAGCGTCTGGAATAGAATGGGATCTTCGTAAAGTTGATCAT  
TATGAGTGTATGACGAATTTGATTGGGAAGTCCAGTGGCAAAAAGAAGGGGATTCTTAGCTCGTTATTTAGTCCGAAT  
CGGTGAAATGACGGAATCTGTCAAATTTATTCAACAGGCTTTAGAAGGAATTCGGGGAGGCCCTATGAAAATTTAGAAA  
TCCGCTGCTTTGAT-----AGAGAA---

AGCGATCCAGAACGGAATGATTTGAAAATAGATTCATTAGTAAAAAGCCTTCTCCTACCTTTGAATTGACAAAACAAGA  
ACTTTATGCGAGAGTAGAAGCCCCAAAAGGAGAATTGGGAATTTTTCTGATAGGGGATCAAAGTGGGTTTCTTGGAGAT  
GGAAAATTCGCCACCAGGTTTATCAATTTGCAAATTTCTCCTCAGTTAGTTAAAAGAATGAAATGGCTGATATTATG  
ACGATATTAGGTAGTATAGATATCATTATGGGGGAAGTTGATCGTTGAATGTTCCCTATGGTAACCGGTTTTCATGAATTA  
TGCTCAACAAACAATACGAGCTGCAAGGTACATTTGGTCAAAGTTTTCATGATTACTTTATCCCAAGCAAACTCGTTTACCTG  
TAACTATTCAATATCCTTATGAAAAATTAATCCCATCAGAGCGTTTTCTGTTGCGAATCCATTTTGAATTTGATAAATGT  
ATTGCTTGTGAAGTATGCGTTTCGGGTATGTCCTATAGATCTGCCTGTTGTTGATTGGAAATTTGAAACAGATATTCGAAA  
GAAACGATTGCTTAATTACAGTATTGATTTTGGAAATTTGATTTTTTGTGGTAACTGCGTTGAGTATTGTCCAACAAAT  
GTTTATCAATGACTGAAGAATATGAACTTGCGACTTACGACCGTCACGAATTGAATTATAATCAAATGCTTTAGGTCGT  
TTACCAATGTCAGTAATTGACGATTTTACAATTCGAACAGTCTTGAATTCGCCTCAACGAAAAACGTCTAA-----  
-----

-----ATGCAG---

GGTCGTTTGTCTGCTTGGCTGGTCAAGCATGGGCTAGTTCATAGATCTTTGGGCTTTGATTACCAAGGAATAGAACTTT  
ACAAATAAAGCCCAGGATTGGCACTCCGTTGCTGTCATTTTGTATATATATGGCTACAATTATCTACGGTCCCAATGTG  
CCTATGATGTAGCACCAGGCGGACTGTTAGCCAGTGTGTATCATCTTACGCGAATAGAGTATGGTGT---  
GATCAACCAGAAGAGGTATGCATAAAAGTATTTGCTCCAAGGAGTAATCCTAAAATTCATCGGTTTTCTGGGTTTGGAA  
AAGTGCGAATTTTCAAGAACGGGAATCTTATGATATGCTGGGAATCCTTTATGATAATCATCCACGACTGAAACGTATCT  
TAATGCCTGAAAGTTGGATAGGGTGGCCCTTACGTAAGGATTATATTGCCCCCAATTTTTATGAAATACAAGATGCTTAT  
TGA-----  
-----

-----ATGAATTCATT---

GAATTTTCTTACTTGATCGAACAACCCCAATTTATTTTCA-----  
ACTACATCAAACGATCTTTCAAATTTGGTCAAGACTCTCCAGCTTATGGCCGCTTCTTTATGGTACCAGTTGTTGTTTCAT  
TGAATTTGCTTTCATTAATCGGCTCGCGTTTCGATTTTACCCTTATGGGCTGGTACCAAGATCGAGCCCTAGACAGGCGG  
ACCTAATTTTAAACAGCTGGTACAGTAACAATGAAAATGGCTCCTTCTTTAGTGAGATTATATGAACAAATGCCTGAACCA  
AAATATGTTATTGCTATGGGAGCATGTACAATTACAGGGGGGATGTTTCAGTACCGATTTCGTATAGTACT---  
GTTTCGAGGAGTTGATAAGCTAATTTCCCGTGGATGTTTATTTGCCGGGTTGCCCGCCTAAACCAGAGGCCGTTATAGATGC  
CATAACAAAATTCGTAAGAAAATATCTCGAGAAATCTATGAAGAT---CGAATTCGATTG-----CAACGGGAG-  
-----AATCGCTCGTTTACTTTTACTACCAATCACAAGTTTCGTGTT-----  
GTATGCAGTACTAATACTGGAAATTTATGATCAAGGATTACTTTATCAA-----  
-----CCACCATCT-----ACGTCAGAAATC---CCGCT-----

---GAAACC-----TTTTTCAAATACAAA---AGTTTCAGTATCTTCC-----CCCGAATTCATTAATTAG-----  
-----ATGCAA---

ATTAGAAATACCTTTTCTTCGTTAAAGGGAGAGATTACTCGATT-----  
ATTTCCGTATCCCTCATG-----ATATATATAATA---  
ACTCGGGCATCAATTTCAAATGCATATCCCATTTTTGCGCAGCAGGGTTTTGAAAATCCACGAGAAGCAACTGGTCGTAT  
TGTATGCGCCAATTGCCATTTAGCTAATAAGCCCGTGGATATTGAGGTTCCACAGGCGGTACTCCCCGATACTGTATTTG  
AAGCAGTTGTTAGAATTCCTTATGATATGCAACTAAAACAAGTTCTTGCTAATGGTAAAAAGGGGGCTTTGAATGTGGGG  
GCCGTTCTTATTTTACCAGAGGGGTTTTGAATTAGCCCCCCCC--  
GATCGTATTTGCCCCGAGATGAAAGAAAAGATAGGC---AAGCTGTCT---TTTCAGACC---  
TACCGACCCACTAAAAAAAACATTCTTGTGATAGGGCCAGTTCTGGTCAGAAATATAGTGAATAACTTTTCCTATTCT  
TTCC  
Coffea           TTATTTAGGAATATTTATA---  
GCATCCCTTTTATATAAACCCCTACTCCTCTTTACAAAATTTTGATTTAATTAATTCAATTCTT-----  
AAAAGAGGTCTAAG---AGA-----  
ATTCTTTGGGACAAAATTATAAATGGCGTATATAAATGGTTCGTATAATCGTGCTTACATAGATTCTTTTTTATACAAGATC  
CTTCACTGGAGGAATAAGAGGATTGGCTAAATTAACTCATTTTTTTGATCGACGGATAGTTGATGGAATTACGAATGGTG  
TTGGTGTATTAAATTTCTTTATAGGAGAAGCTATTAATATATAGGTGGCGGGCGTATCTCTTCTTATCTTTTTCTTCTAT  
TTAACTTATGTATCTATTTTTTTTATTAGTTTTTTTTTATTATTTAA-----  
-----  
ATGAATTTACCTGGACCAATACACGATTTTCTTTTAGTCTTTCTGGGGTTCGGGTCTAATCTTAGGAGGTCTAGGAGTGGT  
ATTACTTCCCAATCCAATTTATTCTGCCTTTTCATTGGGATTCTGTTCTT---GTTTGTATATCTTTA---  
TTCTATATTCTATTGAACTCCTACTTTGTAGCTGCTGCGCAGCTGCTTATTTACGTAGGAGCTATAAATGTTTTAATCAT  
TTTTGCTGTGATGTTTATGAATGGCTCAGAATATTACAAAGATTTTCATCTT-----  
TGGACTATTGGGGATGGAGTTACTTCGGTGGTTTTGTACAGGTCTTTTTATTTCACTAATTACTACTATTCCAGATATGTC  
ATGGTACGGTATTATTTGGACTACAAAATCAAACCAGATTCTAGAGCAAGATTTGATAACTAATAGTCAACAAATTGGAG  
TTCATTTATCAACAGATTTTTTTCTTCCATTTGAACTCGTTTCAATAATTCTTTTAGTTGCTTTAATAGGTGCAATTGCT  
GTAGCTCGTCAATA-----  
-----ATGACT-----  
GTACCAGCTACAAGAAAAGACCTCATGATAGTCAATATGGGCCCTCATCACCCATCAATGCACGGTGTCTTTCGACTCAT  
CGTTACTTTAGATGGTGAAGATGTTATTGATTGTGAACCAATATTGGGTTATTTACACAGAGGGATGGAGAAAATTGCGG  
AAAATCGAACAATTGTACAATATTTACCCTATGTAACACGTTGGGATTATTTAGCTACTATGTTTACAGAAGCAATAACC  
GTAATGGACCTGAACAATTAGGAAATATTCAAGTACCTAAAAGAGCTAGCTATATCCGAGCCATTTTGTGGAGTTGAG  
TCGTATCGCTTCCCATTTGTTATGGCTTGGTCCCTTTATGGCAGATATTGGCGCACAGACCCCTTCTTCTATATTTTTTC  
GAGAAAGAGAATTGATATATGACCTATTGCAAGCTGCTACCGGTATGCGAATGATGCATAATTTTTTTTCGCATAGGAGGA  
GTAGCCGCTGATCTACCTCATGGCTGGATAGATAAATGTTTGGATTTTTGCGATTACTTTTTAACAGGGGTTGCTGAATA  
TCAAAAATTTATTACACGTAATCCTATTTTTTTTAGAACGAGTTGAAGGCGTAGGCATTATCGGCGGAGAAGAAGCACTAA  
ATTGGGGTTTATCAGGACCAATGCTACGAGCTTCCGGAATACAATGGGATCTTCGTAAAGTTGATCATTATGAGTGTAT  
GACGAATTTGATTGGGAGGTTCAATGGCAAAACGAAGGTGATTATTAGCTCGTTATTTAGTACGAATCCGCGAAATGAC  
AGAATCCATAAAAATTATACAACAGGCTCTGGAAGGAATTCCAGGAGGCCCTTATGAGAATTTAGAAATCCGGCGTTTTG  
ATATTGATAGAGTA---  
AAAGATCCCGAATGGAATGATTTTGAATATCGATTTATTAGTAAAAAACCTTCTCCGACCTTTGAATTGTGAAACAAGA  
ACTTTATGTGAGAGTTGAGGCACCAAAAGGAGAATTGGGAATTTTTCTGGTAGGAGATCGAAGTGTTTTTCTTGGAGAT  
GGAAAATTCGTCCACCGGGTTTTATCAATTTGCAAATTTCTCCTCAGTTAGTTAAAAGAATGAAATTTGGCTGATATTATG  
ACGATACTAGGTAGCATAGATATCATTATGGGAGAAGTTGATCGTTAAATGTTTCTTATGTTAACTGAATTCATAAATTA  
TGGTCAACAAACAATCCGAGCTGCCAGGTACATTGGTCAAGGTTTCATGATTACCCTGTCTCATGCGAATCGTTTACCTA  
TAACTATTCAATACCCCTACGAAAACCTGATCACACCGGAACGTTTCCGGGGCCGAATCCACTTTGAATTTGATAAATGC  
ATTGCTTGTGAAGTATGTGTTTCGTGTATGTCCTATAGATCTACCCGTTGTTGATTGGAAAATTGGAAACCGATATTCGAAA  
GAAACAGTTGCTTAATTACAGTATTGATTTTGGAGTCTGTATATTTTGTGGTAATTGCGTTGAGTATTGTCCAACAAT  
GTTTATCAATGACTGAAGAATATGAACTTTCTACTTATGATCGTCACGAATTGAATTACAATCAAATTTTATTGGGTCGG  
TTACCAACATCAGTAATTGATGATTACACAATTCGAACAATTCGAATTCACCCCAATAAAAAATGGATAG-----  
-----  
-----ATGCAG---  
GGTCGTTTGTCTGCTTGGCTAGTCAAGCATGGGCTAATTCATAGATCTTTGGGCTTTGATTACCAAGGAATAGAGACTTT  
ACAAATAAAGTCCGAGGATTGGCATTCTATTGCTGTTATTTTATATGTATATGGTTACAATTATCTCCGTTCCCAATGCG  
CCTATGATGTAGCACCCGGCGGGCTGTTAGCTAGTGTATATCATCTTACGAGAATAGAGTATGGTGTAA---  
GATCAACCAGAAGAGGTATGCATAAAAGTATTTGTCTCAAGGAGGAATCCTAGGATTCGGTCTGTCTTCTGGGTTTGGAA  
AAGTGTGGATTTTCAAGAACGAGAATCTTATGATATGTTGGGAATATCTTATGATAATCATCCACGCTTGAACGTATCT  
TAATGCCTGAAAGTTGGATAGGATGGCCCTTACGCAAGGATTATGTTGCTCCCAATTTTTTATGAAATACAAGATGCTCAT  
TGA-----

-----ATGAATTCCATT---  
GAGCTTCCTTTACTTTGATCGAACAGCCCAAATTCAGTTATTTCA-----  
ACTACATTAATGATTTTTCAAATTTGGTCAAGACTCTCTAGTTTATGGCCACTTCTCTATGGTACCAGTTGTTGTTTCAT  
TGAATTTGCTTCACTAATAGGGTCACGATTTCGACTTTGATCGTTATGGACTAGTACCAAGATCAAGTCCTAGACAGGCAG  
ATCTAATTTTAAACAGCCGGAACGGTAACAATGAAAATGGCCCTTCTTTAGTGAGATTATATGAACAAATGCCTGAACCA  
AAATATGTTATTGCTATGGGAGCATGTACAATTACAGGAGGGATGTTTCAGTACCGATTCTTATAGTACT---  
GTTTCGGGGGTTGATAAGCTAATTCCTGTAGATGTCTATTTGCCAGGCTGTCCCCCTAAACCGGAAGCAGTTATAGATGC  
TATAACAAAACCTTCGTAAGAAAATATCTCGAGAAAATCTATGAAGAT---AGAATTAGGCCT-----  
CAACGTCAACGGTCGAATCGGTGTTTTACT-----ACAAATCACAAGTTTCATATT-----  
AGCCGCAGTATGAATACTGGAAATTATGATCAAGGATTCCTTTATCAA-----  
-----CCGGCATCTACTTTTACTTTCAGAAATA---CCTACT-----  
--GAAACA-----TTTTTCAAATACAAA---AGTTTCAGTCTCTCC-----CATGAATTGGTGAATTAG-----  
-----ATGGAA---  
ACTAGAAATATTTTTTCTTGGATAAAGGAACAGATTACTCGATCT-----  
ATTTCTGTATCTCTCATG-----ATATATATCATA---  
ACTCGAACAGCCGTTTCAAATGCATATCCCATTTTCGCACAACAGGGTTATGAAAATCCACGCGAAGCAACTGGGCGTAT  
TGTATGTGCCAATTGCCATTTAGCTAATAAGCCCGTAGATATTGAGGTTCCACAGGCGGTACTTCTGATACTGTATTTG  
AAGCAGTTGTTTCGAATTCCTTATGATAAGCAACTAAAACAAGTTCTTGCTAATGGTAAAAAGGGGGGTTTGAATGTAGGG  
GCTGTTCTTATTTTACCGGAGGGGTTTGAATTAGCTCCCCC---  
GATCGTATTTCTCCCAGATTAAGAAAAGATAGGC---AATTTGTCT---TTTCAGAGC---  
TATCGCCCTAATAAAAAAATATTCTTGTGATAGGACCTATCCCCGGTCAGAAATATAGCGAAATAACCTTTTCTATTCT  
TTCC  
Cucumis TTTTTTCGGAATATTTATA---  
GCGTCTTTCTTCTATAAGCCCACTTATTCATCTTTACAAAATTTGAATTTTCGTAATTCATTTGTT-----  
AAAAGTTTACTAAG---AAT-----  
TTTTTTTTTGAAAAAATTATAAATATAATATAAATTTGGTCAATAATCGTGGTTACATAGATACTTTTTTATCGAATATC  
CTTAATTTGGGGGTATAAGAATATTAGCTGAATTAACCTTATTTTTTTGATCGACGGATAAATTGATGGAATTACCAATGCGG  
TGGGTATTTCTTAATTTTTTTGTAGCAGAGAGTATTAATATGTAGGAGGTGGTTCGAATCTCGTCTTATATCTTGTGTAT  
TTAGTTTATTTAGTTATTTTTATATTAGTAATTTACTTTGTTTTTTGCTAA-----  
-----  
ATGGATTTGCCTGGACCGATACATGATTTTCTTGTAGTCTTGTGGGGATCAGGTCTTATATTAGGAAGTATGGGAGTACT  
ATTATTTAACTCCATTTATTCTGCTTTTTCTGTTGGGACTGGTTCTT---GTTTCTATATCCTTA---  
TTCTATATTCTAGCAAACGCCAGTTTGTAGCTGCTGCGCAACTCCTTATTTACGTGGGAGCTATAAATGTTTTAATCAT  
ATTTGCTGTGATGTTTCATGAAGGGTTTCAAGATTTTCAAAGATTTTAAATCTT-----  
TGGACCGTTGGGAATGGAGTTACTTTTTCTGGTTTGTACAAGTATTTTTGTTTCACTAATGACTACTATTGTGGATACGTC  
ATGGTATGGTATTATTTGGACTACACGATCAAATCAGATTCTAGAGCAAGATTTAATAAGTAATAGTCAACAAATTGGAA  
TTTATTTATCAACATATTTTTTTCTTCCATTTGAACTCATTTCGATCATTCTTTTAGCTGCTTTGATCGGCGCAATTGCC  
GTGGCTCGCCAGTAA-----  
-----ATGAAT-----  
GGACCAGCTACAAGAAAAGACCTCATGATAGTCAATATGGGACCTCACCACCCTCAATGCACGGTGTCTTCGACTCAT  
CCTTACTTTGGATGGTGAAGATGTTATTGACTGTGAACCAATATTGGGTTATTTACACAGGGGGATGGAAAAAATTGCAG  
AAAACCGAACAATTATACAATATCTACCTTATGTAACACGTTGGGATTATTTAGCTACTATGTTTACAGAAGCAATAACC  
GTAAATGGTCCAGAACAGTTGGGAAATATTCAAGTCCCTAAAAGAGCCAGCTATATCAGAGTAATTATGTTGGAGTTGAG  
TCGTATAGCTTCTCATCTGTTATGGCTTGGCCCTTTTATGGCGGATATTGGCGCACAGACTCCCTTCTTCTATATTTTCA  
GAGAACGAGAATTAGTATATGATCTATTTCGAAGCAGTACCAGTATGAGAATGATGCATAATTTTTTTCGTATCGGGGA  
GTCGCGGCTGATTTACCTCATGGATGGATAGATAAATGTTTGGATTTCTGCGATTATTTTTTGACAGCGGTTGCTGAATA  
TCAAAAACCTTATTACACAAAATCCTATTTTTTTTAGAACGAGTTGAGGGAGTAGGTATTATTTTTCGGAGAAGAGGTCATAA  
ATTGGGGTTATCAGGACCAATGCTGCGAGCTTCCGGAATACCATGGGATCTTCGTAAAGTTGATCGTTATGAGTGTAT  
GACGAATTTGATTGGGAAGTTTCAGTGGCAAAAAGAAGGCGATTATTAGCTCGTTATTTAGTCAAGTGGTGTGAGATGAC  
GGAATCCGTAAAATATTCAACAAGCTTTGGAAGGAATTCAGGGGGACCTTATGAAAATTTAGAAATACGATCTTTTG  
AT-----CGAGCA---  
AGGTCTCCGGAATGGAATGACTTTGACTATCGATTATTAGTAAAAAACCTTCGCCAATTTTGAATTGGCGAAACAAGA  
ACTTTATGTGAGAGTCGAAGCCCCCAAAGGGGAATTGGGCATTTTTTTGATAGGGGATCAGGGTGGTTTTCTTGGAGAT  
GGAAAATTCGCCC GCCGGTTTTATCAATTTGCAAATTTCTTCTCAGTTAGTTAAAAGAATGAAATTGGCTGATATTATG  
ACAATACTAGGTAGCATAGATATCATTATGGGAGAAGTTGATCGTTAAATGTTCCCTATGGTAACTGGGTTTCATGAATTA  
TGGTCAACAAACAGTACGAGCTGCAAGGTACATTGGTCAGGGTTTCGTGATTACTTTATCCCATGCAAAATCGTTTTGCCTG

TAACTATTCAATATCCTTACGAAAAATTAATAGCATCGGAGCGTTTTCCGCGGTGCGAATCCATTTTGAATTCGATAAATGC  
ATTGCTTGTGAAGCATGTGTTTCGTGTATGTCCTATAGATCTCCCCGTTGTTGATTGGAAATTGGAAACGGATATTCGAAA  
GAAACGATTGCTTAATTACAGTATTGATTTCCGGATCTGTATATTTTGTGGTAACTGCGTTGAATATTGTCCAACAAATT  
GTTTATCAATGACTGAAGAATATGAACTTTCTACTTATGATCGTCACGAATTGAATTATAATCAAATTTCTTTGGGTCGT  
TTACCGATGTCAGTAGTTGATGATTATAACAATTAGAACAATTTTGAATTAG-----

-----ATGCAG---

GGTAATTTGTCTTCTTGGCTAGTCAAACATGGACTGGTTCATAGATCTTTGGGTTTCGATTACCAAGGAATAGAGACTTT  
ACAAATAAAGCCCCGAGGAATGGCATTCCATTGCAGTCATTTTATATGTATATGGTTACAATTATCTACGTTCCCAATGTG  
CTTATGATGTAGCACCAGGCGGACTGTTAGCTAGTGTGTATCATCTTACGAGAATCGAGTATGGTATA---  
GATCAACCGGAAGAGGTATGCATAAAAGTATTTGCCGCAAGGATAAAATCCTAGAAATCCGCTGTGTTTTCTGGGTTTGGAA  
AAGTGCAGGATTTTCCAGAAAAGGGAATCTTATGATATGTTGGGAATTTATTATGATAATCATCCACGTCTAAAGCGTATCT  
TAATGCCTGAAAGTTGGGTAGGATGGCCCTTACGTAAGGATTATATTGCCCCCAATTTTTTATGAAATACAAGATGCTCAT  
TAA-----

-----ATGAATTCCATC---

GAGTTTCCCTTACTTGATCGAACAACCTCAAACCTCAGTTATTTCA-----  
ACTACATCAAATGATCTTTCAAATTTGGTCAAGACTTTCCAGTTTATGGCCGCTTCTCTATGGTACCAGTTGTTGCTTCAT  
TGAATTCGCTTCATTAATAGGTTCCAGATTGCAGTTTGTATCGTTATGGACTGGTACCAAGATCTAGTCTTAGACAGGCAG  
ACTTAATTTTAAACAGCGGGTACGGTAACAATGAAAATGGCTCCTTCTTTAGTAAGATTATATGAGCAAATGCCTGAACCA  
AAATATGTTATTGCTATGGGAGCCTGTACAATTACAGGAGGGATGTTTCAGTACCGATTCTTATAGTACT---  
GTTTCGAGGAGTCGATAAGTTAATTCCTGTGATGTGATTTGCCGGGTTGTCCACCTAAACCCGAGGCTGTTATAGATGC  
TATAACAAAACCTTCGTAAGAAAATATCTCGAGAAATCTATGAAGAT---CGAATTAAGTCT-----CAAGAGGAA-  
-----AATCGGTGTTTTACT-----ACCAATCACAATTTTCATGTT-----

-----CCATCATCT-----ACTTCAGAGATCATCCCTCCT-----

--GAAACT-----TTTTTCAAATACAAA--AGTGCAGTCTCTTCC-----TACGAATTAGTAAATTAG-----

-----ATGCAA---

ACTAGAAATACCTTTTCTTCGATAAAGGAAGAGATTACTCGATCT-----  
ATTTCCGTATCACTCATG-----ATATATATAATA---  
ACTTGGGCACCCGTTTCAAATGCATATCCATTTTTTGCAACAACAGGGGTATGAAAATCCACGAGAAGCAACCCGGCCGTAT  
TGTCTGCGCCAACCTGCCATTTAGCTAATAAACCCGTGGATATCGAGGGTCCACAAGCGGTACTTCTGATACTGTATTTG  
AAGCAGGTGGTTCGAATCCCTTATGATATGCAACTGAAACAAGTTCTTGCGAATGGGAAAAAGGGCTGGTTGAATGTGGGG  
GCCGGTCTTATTTTACCCGAAGGGTTTGAATTAGCCCCCCCC---  
GATCGGATTTCTCCCGAGATTAAGAAAAAAGGGCC--AATCTGTGC--TTTTTCAGAGCC--  
TATCGTCCCACGAAAAAATATTTCTTGTGATAGGTCTGTTCTTGGTTCAGAAATATAGTGAATCACCTTTTCTATTCT  
TTCCC

Daucus TATTTTTGGAATATTTATA---

GCCTTCTTTTTATATAAACCTGTTTATTCATCTTTACAAAATTGGGACTTAATTAACCTTTTTGTT-----  
AAAACAGGTCCTAAA---AGA-----  
ATTCTTTTGGACAAAATAATAAATGGTATATATGATTGGTTCATATAATCGTGGTTATATAGATGCTTTTTATGCAAGATT  
CTTTATTGGGGGAATAAGAGGATTGGCCAAGTTAACTTCTTTTTTTGATAGACGAGTAATTGATGGAATTACTAATGGAG  
TTGGTGTTTTGGTCTTTTTTTAGGTGAAGGTATCAAATCTATAGGTGGGGGGCGCATCTTCTTATCTTTTTCTTGTAT  
TTCTTTTTTTGTAGCAATCCTTTTTATTAATTATTAATTTTTTATTAATTTAA-----

ATGGATTTACCCGGACCAATACATGATTTTCTTTTAGTCTTCTGGGATCGGGTCTTATATTAGGAGGTCTGGGAGTGGT  
ATTACTCCCCAATCCAATTTATTTCTGCCTTTTCATTAGGATTGGTTCTT---GTTTGTACATCCTTA---  
TTCTATATTCTATCAAACCTCCATTTTGTAGCTGCTGCGCAACTTCTTATTTACGTAGGAGCTATAAATGTTTTAATCAT  
TTTTGCTGTAATGTTTCATGAATGGTTCCGAATATTACAAAGATTTTCATCTT-----  
TGGACCGTTGGGGACGGAGTTACGTCGATGGTTTGTACAAGTATTTTTGTTTACTAATTACTACTATTCCAGATACGTC  
ATGGTACGGGATTATTTGGACTACAAAATCAAACCAGATTGTAGAGCAAGATTTGATAAGTAATAGTCAACAAATTGGGA  
TTCATTTATCAACAGATTTTTTTTCTTCCATTTGAACTTATTTCAATAATTCTTTTTAGTTTTCGTTAATAGGTGCGATTACT  
GTAGCTCGTCAATA-----

-----ATGACT-----

GCACCAGCTACACGAAATGACCTTATGATAGTCAATATGGGTCCTCAGCACCCATCAATGCACGGTGTCTTTCGACTCAT  
TGTTACTCTAGATGGTGAAGATGTTATTGACTGTGAACCAATATTGGGTTATTTACATAGAGGGATGGAAAAAATTGCGG  
AAAACCGAACAATTATACAATATTTACCTTATGTAACGCGTTGGGATTATTTAGCTACTATGTTTACCGAAGCAATAACT

GTAAATGCCCCAGAGCAGTTAGGCAATATTCAAGTGCCTAAAAGGGCCAGCTATATCAGAGTCATTATGTTAGAGTTAAG  
TCGTATAGCTTCGCATTTGTTATGGCTTGGCCCTTTTATGGCAGATATTGGCGCACAGACCCCTTCTTCTATATTTTC  
GAGAAAGAGAATTGATATATGACCTATTGCAAGCTGCTACCGGTATGCGAATGATGCATAATTTTTTTTCGTATTGGAGGA  
GTCGCTGCTGATTTACCTCATGGCTGGATAGATAAATGTTTGGATTTTTGTGATTATTTTTTAACAAGAGTTACTGAATA  
TCAAAGGCTTATTACACGGAATCCTATTTTTTTAGAGCGAGTTGAGGGAGTGGGCATTATTGGCGGAGAGGAGGCAATAA  
ATTGGGGTTTATCGGGACCAATGCTACGAGCTTCCGGAATACAATGGGATCTTCGGAAGGTTGATCATTACGAGTCTTAC  
GATGAATTTGATTGGGGAGTTCAATGGCAAAGGAAGGGGATTTCGTTAGCTCGTTATTTAGTACGAATCAGTGAATGAC  
AGAATCAGTAAAAATTATTCAACAGGCTTTAGAAGGAATTACGGGGGGGCCATATGAGAATTTAGAAATCCGACGCTTTG  
AT-----AAAGTA---

-----ATGCAG---

GGTCGTTTGTCTGCTTGGTTAGTCAAGCATGGACTAATTCATAGATCTTTGGGTTTTGATTACCAAGGAATAGAACTTT  
ACAAATAAAACCCGAGGATTGGCATTCCATTGCTGTCATTTTATATATATATGGTTACAATTTTACGCTCCCAATGTG  
CCTATGATGTAGCACCAGGTGGACTGTTAGCTAGTGTGTATCATCTTACGAGAATAGAGTATGGCGTG---  
GATCAACCAGAAGAGGTATGCATAAAAGTATTTCCCCGAGGAAAAATCCTCGAATTCGGTCTGTTTTCTGGGTTTGAA  
AGGTGTGGATTTTCAAGAACGGGAGTCTTTTGATATGTTGGGAATATCTTATGATAATCATCCGCGTTTTGAAACGCATCT  
TAATGCCTGAAAGTTGGATTGGATGGCCTTTACGTAAGGATTATATTGCCCCCAATTTTTATGAAATACAAGATGCTCAT  
TGAATGGGCAATGAGTTTCGATGTATTAGGTATATCTGTATTTGTAGAAGCTTTAATTTTCGTGCTTATCTTAATTTGTTG  
GTTTAGTTTTATGCATGGCGAAAAGGGGCATTGGAATGGTCTTAGCTTCTAAACATTCA---GACAATAAAAAAG-----  
AAAAAATA---AAGAATATTGAGACAGTTATGAATTCATC---  
GAGTTTCCCTTACTTGATCGAACAACCCAAAATTCAGTTATTTCA-----  
ACTACATCAAACGATCTTTCAAATTTGGTCAAGACTTTCTAGTTTATGGCCGCTTCTCTATGGTACCAGTTGTTGCTTCAT  
TGAATTTGCTTCACTAATAGGCTCACGATTGCACTTTGATCGTTATGGACTAGTCCCAAGATCAAGTCTTAGACAAGCGG  
ACCTTATTTTAAACAGCCGGAACAGTAACAATGAAAATGGCTCCCTCTTTAGTGAGATTATATGAGCAAATGCCTGAACCA  
AAATATGTTATTGCTATGGGAGCATGTACAATTTAGGGGGGATGTTGAGTACTGATTCTTATAGTACT---  
GTTCCGGGAGTCGATAAGTTAATTCCTGTAGATGTCTATTTGCCAGGTTGTCCACCAAAACCGGAAGCAGTTATAGATGC  
TATAACAAAACCTTCGTAAGAAAATATCTCGAGAAATCTATGAAGAT---AGAATTAAGTCT-----CAACGAGAG-  
-----AATCGGTGTTTTACA-----ACCAATCACAAATTGAAGGTC-----  
GGGCGTAGTATTCATACCGGAAATTACGATCGGGAGTTTCTTTATCAA-----  
-----CCGACATCC-----ACTTCGGAGATC---CCCCC-----  
--GAAACA-----TTTTTCAAATACAAA---AGTTTCAGTCTCTTCC-----CACGAATTAGTGAATTAG-----  
-----ATGCAA---

ACTAGAAAGACTTTTTCTTGGATAAAGGAACAAATAAATCGATCC-----

ATTTCCGTATCGCTCATG-----ATATATATCATA---

ACTCGGCCATCTATTTCAATTGCATATCCCATTTTTGCACAACAAGGTTATGAAAATCCACGAGAAGCGACTGGTCTGAT  
TGTATGTGCCAATTGCCATTTAGCTAATAAGCCCGTGGATATTGAAGTTCCACAAACGGTACTTCCAGATACTGTATTTG  
AAGCAGTTGTTTCAATACCTTTATGATATGCAACTAAAACAAGTTCTTGTCTAATGGTAAAAGGGGTACTTTGAATGTAGGG  
GCTGTTCTTATTTTACCAGAGGGTTTTGAATTAGCTCCTGCC---  
GATCGGATTTCCCGGAGATGAAAGAAAAGATAGGC---AATCTTTCT---TTTCAGAGC---  
TATCGCCCAATAAAAAAATATTCTTGTGATAGGCCCGTTTCTGGTTCAGAAATATAGTGAATAACCTTTCTATCCT  
TTCC

Dioscorea

-----  
-----  
-----  
-----  
-----



-----ATGCAA----

AATAGAAATACTTTTTTGGGGGTAAAGGAGCAGATAACTCGATCC-----  
ATTTTTGTATCGATCATG-----ATATATGTAATA---  
ACTCGGGCATCTATTTCAAATGCATATCCCATTTTTGCACAACAGGGTTATGAAAATCCACGAGAAGCAACTGGACGAAT  
TGTATGTGCCAATTGTCATTTAGCTAGTAAGCCCGTGGATATTGAAGTTCCCCAAGCTGTGCTTCCTGATACTGTATTTG  
AAGCAGTTGTTCTGAATCCCTTATGATATGCAACTGAAACAAGTTCCTTGCTAATGGTAAAAAAGGGGCTTTGAATGTGGGG  
GCTGTTCTTATTTTTACCCGAAGGATTCTGAATTAGCCCCTCCC---  
GATCGCATTTCCTGAAGTGAAAGAAAAGATGGGA---AATCTGTCT---TTTCAGAAT---

TATCGTCCCAATAAAAAAAAAATATTATTGTGATAGGTCCCCTCCTGGTCAGAAATATAGTGAAATCGTCTTTTCTATTCT  
TTCCC  
Drimys CTATTTTCGGAATATTCATA---  
GCGTCTCTTTTATATGGTTCCTGTTTATTTATTTTTTTCAGAAATTTGGAATTAATCAATTCATTTGTT-----  
AAAATCGGCCCTAAG---AGA-----  
ATTTTCTTGGACCAAATAATAAATGTGATCTACAATTTGGTCATATAATCGTGGTTACATAGACGTTTTTTTATGCAACATC  
TTTAACTAAAGGCATAAGAGGATTAGCCAACTAACTCATTTTTTTGATAGACGAGTAATTGATGGAATTATGAATGGGG  
TTGGTGTTCAGTTCCTTTGTAGGAGAGGGGATCAAATACCTAGGGGGTGGACGAATCTCTTCTTATCTCTTTGTATAT  
TTATCTTATGTGTCAATCTTTTTATTAATTTACATCTTTTTTTTTTCGAAAAGTTGAGTCGATAAAGCTTTTTTCAAACCAA  
AAATGGAATTCCTCTTTATCTTTAA-----  
ATGGATTTACCTGGACCAATACACGATATCTTTTAGTATTTTTGGGATCAGGTCTTATACTAGGGGGTCTAGGAGTGGT  
ATTATTTACCAATCCCATTTTTCTGCCTTTTCATTGGGATTGGTTCTT---GTTTGTATATCCTTA---  
TTCCATATTCTATCTAACTCCTATTTTTGTAGCTGCTGCACAGCTCCTTATTTACGTGGGAGCTGTAAATGTCTTAATCAT  
ATTTGCTGTGATGTTTATGAATGGTTTCAAGATATTACAATGATTTCTATCTT-----  
TGGACCGTTGGAGATGGGGTCACTTCACTGGTTTGTACAAGTATTCTTTTTTCACTAATTACTACTATCTCAGATACGTC  
ATGGTATGGGATTATTTGGACTACAGGATCAAACCAGATTATAGAGCAGGACCTGATAAGTAATGTTCAACAAATTGGGA  
TTCATTTATCAACAGATTTTTATCTTCCATTTGAACTCATTTCTATAATTCTTTTAGTTGCCTTGATAGGTGCAATTGCT  
ATGGCTCGTCAGTAA-----  
-----ATGACT-----  
GTACCGGCTACAAAAAAGACCTCATGATAATCAATATGGGTCCCTCACCACCCATCAATGCATGGTGTCTTTCGACTCAT  
TGTTACTCTAGATGGTGAAGATGTTATTGACTGTGAACCTATATTGGGTTATTTACACAGAGGGATGGAAAAAATTGCGG  
AAAACCGAACAATTATACAATATCTGCCATATGTAACACGTTGGGATTATTTAGCTACTATGTTTACAGAGGCAATAACG  
GTAAATGCCCGGAACAATTGGGAAATATTCAAGTACCTAAAAGAGCCAGTTATATCAGAGTTATTATGCTGGAGCTAAG  
TCGTATAGCTTCTCATTTGTTATGGCTTGGGCCTTTTTATGGCAGATATCGGTGCACAGACCCCTTTCTTCTATATTTCC  
GAGAGAGAGAATTGCTATATGATCTATTGCAAGCTGCCACAGGTATGCGAATGATGCATAAATTATTTCCGTATCGGAGGA  
GTAGCTGCTGATCTACCTCATGGATGGATAGATAAATGTTTGGATTCTGCGATTATTCTTTAACAGGAGTTGTTGAATA  
TCAAAGCTTATTACGCGGAATCCCATTTTTTGGAAACGAGTTGAAGAAGTGGGCATTATTGGTGGAGAGGAAGCAATAA  
ATTGGGGTTTTATCAGGACCAATGCTACGAGCTTCCGGAATCCAATGGGATCTTCGTAAAGTTGATCATTATGAATGTTAT  
GATGAATTCGATTGGGAAGTCCAATGGCAAAAAGAAGGAGACTCGTTAGCTCGTTATTTAGTACGAATCAGTGAATGAC  
GGAATCCATAAAAAATCTTCAACAGGCTCTGGAAGGAATTCGGGGGGACCCTATGAGAATTTAGAAGTCCGACGCTTGT  
AT-----AGAGCA---  
AAGGATTCTGAATGGAACGATTTTGAATATCGATTATTAGTAAAAAACCTTCTCCCACCTTTGAGTTGTTAAAAACAAGA  
ACTTTATGTGAGAGTAGAAGCCCCAAAAGGAGAATTAGGAATTTTTCTGATAGGAGATAATAGTGTTTTTTCCCTGGAGAT  
GGAAAATTCGTCCACCGGGTTTCATAAATTTGCAAATTTCTCCTCAGCTAGTTAAAAGAATGAAATTTGGCTGATATCATG  
ACGATACTAGGTAGTATAGATATCATTATGGGAGAAGTTGATCGTTGAATGTTCCCTATGATGACTGGGTTTATGAATTA  
TGGTCAACAAACAGTACGAGCTGCAAGGTACATTGGTCAAAGTTTTCATGATTACCTTATCCCACGCGAATCGTTTACCTG  
TAATATTCAATATCCTTATGAAAAATCGATCACATCAGAGCGTTTCCGTGGTTCGAATCCACTTTGAATTTGATAAATGT  
ATTGCTTGTGAAGTATGTGTTTCGTGTATGCCCATAGATCTACCCGTTGTTGATTGGAGATTGGAAACAGATATTAGAAA  
GAAACGATTGCTTAATTATAGTATTGATTTCCGGAATCTGTATATTTTGTGGTAACTGCGTCGAGTATTGTCCAACAACT  
GTTTATCAATGACTGAAGAATATGAACTTTCCATTTATGATCGTCACGAGTTGAATTATAATCAAATTTGCTTTGGGTCGG  
CTACCAATGTCAGTAATTGGAGATTACACAATTCGAACAATTATGAATTCGACTCAAATTTAAAATAACCACGGATAAACC  
CCTTGATTCAATAACGATTACCAATGACTAA-----  
-----ATGCAA---  
GGTCGTTTATCTGCTTGGCTAGTCAAGCATGAGCTAGTGCATAGATCTTTGGGCTTCGATTACCAAGGAATCGAGACTTT  
ACAAATAAAGCCCCGAGGATTGGTACTCCATTGCTGTCTATTTTATATGATATGGTTACAATTATCTACGTTCCCGAGTGTG  
CTTATGATGTAGCACCTGGGGGGTTGTTAGCTAGTGTGTATCATCTTACGAGAATACAGTATGGTGTG---  
GATCAACCCGAAGAGGTATGCATAAAAAGTATTTGCCCAAGGAGGAATCCTAGAATCCCCTGCTGTTTTCTGGATTTGGAA  
AAGTGTGATTTTTCAAGAACCGGAATCTTATGATATGTTGGGAATCTCTTATGAAAATCATCCACGCCTGAAACGTATCT  
TGATGCCTGAAAGTTGGATAGGCTGGCCCTACGTAAGGATTATATTGCCCAATTTCTATGAAATACAAGATGCTCAT  
TGAATGGGCAATGAGTTTCGATGATTGGGTGTATCTGTATTTATAGAAGCTTTAATTTTTCGTGCTTATCCCAATTATTG  
GTTTCAGTTTATGCATGGCGAAAAGGAGCATTGGAATGGTCTTAGCTCCTGAATATTCA---  
GACAATCAAAATCAAAAACAAAGAAA---GATTACATTGAGACAGTTATTAATTCTATT---  
GAGTTTCCGTTACTTGACCGAACAACCCAAAATTCAGTTATTTCA-----  
ACTACATCGAATGATCTTTGCAATTTGGTCAAGACTTTCCAGTTTATGGCCGCTTCTCTATGGTACCAGTTGTTGCTTCAT  
TGAATTTGCTTTCATTAATAGGCTCGCGATTGCACTTTGATCGTTATGGACTGGTACCAAGATCGAGTCTTAGGCAAGCAG  
ACCTCATTTTTAACAGCCGGCACAGTAACAATGAAAATGGCGCTTCTTTAGTGAGATTATATGAGCAAATGCCTGAACCA  
AAATATGTCATTGCCATGGGAGCTTGTACTATTACAGGAGGGATGTTTCAGTACGGATTCTTATAGTACC---

GTTCTGGGGAGTCGATAAGCTAATTCCTGTGGATGTCTATTTGCCGGGCTGCCCGCCCAAACCAGAGGCAGTTATAGATGC  
TATAACGAAACTTCGTAAGAAAGTATCTCGAGAAATCTATGAAGAT---CGAATTGGGTCT-----CAACAAGAA-  
-----AATCGATATTTTACT-----ACCAATCACAAAGTTTCATGTT-----  
GGACGCAGTACTCATACTGGAAATTACGATCAAGGATTACTCTATAAA-----  
-----TCTCCATCT-----ACTTCAGAAATA---  
CCTCCTGAAACTGAAACA-----TTTTTCAAATACAAA---AGTTCAGTATCTTCC-----  
CACGAATTAGTGAATTAG-----ATGCAA---  
AATAGAAATACCTTTTCTTGGGTAAAGGAACAGATGACTCGATT-----  
ATTTCCGTATCGATCATG-----ATATATGTAATA---  
ACTAGGACATCTATTTCAAATGCATATCCTATTTTTGCGCAGCAGGGTTATGAAAATCCACGAGAAGCAACTGGGCGTAT  
TGTATGTGCCAATTGCCATTTAGCTAATAAAACCCGTGGATATTGAGGTTCCACAAGCTGTGCTTCTGATACTGTATTTG  
AAGCAGTTGTTAGAATCCCTTATGATATGCAACTGAAACAAGTTCTTGCTAATGGTAAAAAGGGGTCTTTGAATGTCGGG  
GCTGTTCTTATTTTACCGATGGATTGCAATTAGCTCCCCC---  
GATCGTATTTCTCCCGAGATGAAAGAAAAGATAGGC---AACCTGTCT---TTTCAGAGT---  
TATCGCCCCACTAAAAAAATATTCTTGTGATAGGTCCTGTTTCTGGTCAGAAATATAGTGAAATCGTCTTTCCCATTCT  
TTCTC  
Eucalyptus TTTTTTCGGAATATTTATA---  
GCGTCTTTTTTATATAAGCCTATTTATTCATCTTTACAAAATTTGAACTTACTAAATTCGTTTTCT-----  
AAAAGGGGTTCTAAT---AGA-----  
ATTTTAGGGGACAGAATAAGAAATGGGATATATGATTGGTCATATAATCGTGGTTACATAGATGCTTTTTTATACAATATC  
CTTAACTCAGGGTATAAGAGGACTAGCTGAACTAATTCATTTTTTGGATAGACGACTAATTGATGGAATTACGAATGGTT  
TCGGTCTTACAAGTTTCTTTTTCGGAGAAGGTATCAAATATGTAGGGGGCGGTCGCATCTCTTCTTATCTCTTATTGTAT  
TATAGTTTGTATTAA-----  
-----  
ATGGATTTGCCTGGACCAATACATGATTTTCTTTTAGTTTTCTGGGATCAGGTCTTATATTAGGAAGTCTAGGGGTGGT  
ATTACTTACCAATCCAATTTATTCTGCCTTTTCTTGGGATTGGTTCTT---GTTTGTATATCCTTA---  
TTTTATATTCTATCAAACCTCCCATTTTGTAGCGGCTGCGCAGCTCCTTATTTATGTAGGAGCTATAAACATTTTAATTCT  
ATTTGTCTGTGATGTTTCATGAATGGTTTCAAGATTTTACAAGATTTGAATCTT-----  
TGGACTGTTGGAGATTGGGATTACTTCGTTGGTTTTGTACAAGTATTTTGGTTTCACTAATGACTACTATTTTTAGATACGTC  
GTGGTACGGGATTATCTGGACGACAAAGTCAAACCAGATTATCGAGCAAGATTTGATAGGTAATAGTCAACAAATTGGAA  
TTCATTTATCAACAGATTTTTTTCTTCCATTTGAACTCATTTCATAATTTCTTTTAGTTGCTTTGATAGGTGCAATTGCT  
GTTGCTCGTCAATGA-----  
-----ATGAAT-----  
GTAACAACACTACAAGAAAAGACCTCATGATAGTCAATATGGGACCTCACCACCCATCAATGCATGGTGTCTTTCGGCTCAT  
CCTTACTCTAGATGGTGAAGATGTTATTGATTGTGAACCAATATTAGGTTATTTACACAGAGGAATGGAAAAAATTGCGG  
AAAATCGAACAGTTATACAATATCTACCTTATGTAACACGTTGGGATTATTTAGCTACTATGTTTACAGAAGCAATAACC  
GTAAATGGACCAGAACAGTTGGGAAATATTCAAGTACCTAAAAGAGCCAGTTATATCAGAGTAATTATGTTAGAGTTGAG  
TCGTATAGCTTCTCATCTGTTATGGCTTGGCCCCTTTATGGCAGATATTGGTGCACAGACCCCTTTTTTCTATATTTTCA  
GAGAAAGAGAATTAGTATATGATCTATTGCAAGCTGCCACCGGTATGAGAATGATGCATAATTATTTTTCGTATCGGAGGA  
GTAGCGGCCGATCTACCTTATGGATGGATAGATAAATGTTTGGATTTCTGTGATTATTTTTTAAACAGCGGTTTCTGAATA  
TCAAAAACCTTATTACGCGAAATCCTATTTTTTTAGAACGAGTTGAGGGAGTAGGCATTATTGGTCCAGAAGAAGCAATAA  
ATTGGGGTTTATCGGGACCAATGCTACGAGCTTCCGGAATCCAATGGGATCTTCGTAAAGTTGATCATTATGAATGTTAC  
GACGAATTGGATTGGGAAATCTTTTGGCAAAAAGAAGGAGATTATTAGCTCGCTATTTAGTCCGAATCGGTGAAATGAG  
GGAATCTATAAAAATTTTCAACAAGCTCTGGAAGGAATTCAGGGGGGCCCTATGAGAATTTAGAAACCCGGTGTCTTG  
CT-----AGAGAA---  
AGGGATCCGGAATGGAATGATTTTGAATATCGATTATTAGTAAAAAACCTTCTCCTACTTTTGAATTGCCGAAGCAAGA  
ACTTTATGTAAGAGTTGAAGCCCCAAAGGGAGAATTGGGAATTTTTTAAATAGGAGATCAGAGTGGTTTTCTTGGAGGT  
GGAAAATTCGTCCACCTGGTTTTATCAATTTGCAAATTTCTCCTCAGTTAGTTAAAAGAATGAAATTGGCCGATATTATG  
ACAATACTAGGTAGCATAGATATCATTATGGGAGAAGTTGATCGTTAAATGTTCCCTATGGTAACTGGGTTTATGAATTA  
CGGTCAACAAACAGTACGAGCTGCAAGGTACATTGGTCAAGGGTTCATGATTACCTTATCTCACGCAATCGTTTTACCTG  
TAACTATTCAATATCCTTATGAAAAATTAATTACATCTGAGCGTTTTCCGCGGCCGAATCCATTTTGAATTTGATAAATGC  
ATTGCTTGTGAAGTATGTGTTTCGTGTATGTCCTATAGATCTACCTGTTGTTGATTGGAAATTGGAAACTGGTATACGAAA  
GAAACGCTTGCTTAATTACAGTATTGATTTTCGGAATTTGTATTTTTTGTGGTAACTGTGTTGAGTATTGTCCAACAAAT  
GTTTATCAATGACTGAAGAATATGAACTTTCTACTTATGATCGTCACGAATTGAATTATAATCAAATCGCATTGGGTCGT  
TTACCAATGTCAGTAATTAACGATTATACAATTCGAACAATTTGCAATTCGCCTCAAATAATAATAAATAA-----  
-----ATGCAG---



-----ATGCAA-----

AATAGAAATATTTATGACTGGGTAAAAAGTGGATGACTCGATCA-----  
ATTTCCATCTTGATCATG-----ATACATATAATA---  
ACTCGGACATCTATTTTGAATGCATATCCCATTTTTTGCACAGCAGGGTTATGAAAATCCCCGAGAAGCAACCGGGCGTAT  
TGTATGTGCCAATTGTCACCTGGCTAAAAAGCCTGTGGATATCGAGGTTCCACAGTCCGTGCTTCCCGATACCGTATTTG  
AAGCAGTTGTAAAATCCCCTGCGATATGCAAATGAAACAAGTTATTGCTAACGGTAAAAAAGGGACTTTGAATGTAGGA  
GCTGTTCCAATTTTACCTGAGGGCTTTGAATTAGCCCCCCCC---  
GATCGTATTTCTCCTAAGATTAAGGAAAAGATAGGT---AATCTTTAT---TTTCAGAAC---  
TATCGCCCCAATCAAAAAAATATTCTTGTAATAGGTCCTGTTTCTTAGTAAAAAATATAGTGAAATTGTGTTTCCCATCCT  
TTCAC

Glycine TTTTTAGGAATATTTATA---  
GCGTCTTTTTTTTTACAAACCTGTTTATTTCAGATTTACAAAATTTGAATTTATTAATTTATTTGAA-----  
AAAAATGTTCTTAAT---AAA-----  
AAAGTTGCTGATTATTTTCAAATGTCATATATGATTGGTTCGTATAATCGTGGTTATATAGATGTTTTTTATGATATATC  
TTTAATTACGAGTGTAAGAAAATTAGTACAATTCATTATTTTTTTGATAAAAAAATAATTGATGCAATTCGAATGGAA  
TAGGTATTACAAGTTTTTTTTATGGGAGAGGCCATCAAATATGTAGGAGGCGGGCGAATTTCTTCATATATTTTATTGTAT  
ATATTCTATATAGTAATCTTTATACTAATTTGGTATTTTTTTATTTACTAATATTTAA-----

ATGGATTTGCCCGAACCGCTACATGATTTTCTTTTAGTCTTTCTTGGATCGGGTCTTATATTAGGAAGTCTGGGAGTAGT  
ATTATTTACGAATCCCATTTTTTCTGCTTTTTTCATTGGGCCTAGTTCTT---GTTTGTATATCTTTA---  
TTCTATATTTTATCAAACCTCCCATTTTTGTAGCTGCATCACAACACTATTATTATGTGGGCGCTATAAATGTTTTAATAAT  
ATTTGCTGTGATGTTTATGAATGGTTTCGGAATATTACCAAGATTTTCGTCTT-----  
TGGACTGTTGGGGATGGAATTACTTTGATGGTTTGTACAAGTATCTTTGTTTCACTAATAACTACTATTCTAGATACATC  
ATGGCACGGGATTATTTGGACTACAAGACCCAATCAGATTATAGAGCAAGATTTGATAAGTACTAGTCAACAAATTGGAA  
TTCATTTATCAACAGATTTTTTTCTCCATTTGAACTAATTTCAATAATCCTTTTTAGTTGCTTTGATAGGTGCAATTGTC  
GTAGCTCGCCAATA-----

-----ATGAAT-----  
ATCTCAACTACAAGAAAGGACTTCATGATAGTCAATATGGGGCCTCACCACCCATCAATGCATGGTGTCTTACTAGACTTAT  
TGTTACTCTAGACGGTGAGGATGTTATTGATTGTGAACCTATATTGGGTTATTTACACAGAGGAATGGAAAAAATAGCGG

AAAACCGAACAAATTATACAATATTTGCCTTATGTAACACGTTGGGACTATTTAGCTACTATGTTTACAGAAAGCAATAACT  
GTAAATGGACCAGAACAGTTGGGAAATATTCAAGTACCTAAAAGAGCCAGTTATATCCGAGTAATAATGTTGGAGTTAAG  
TCGTATAGCTTCTCACCTACTATGGCTAGGACCTTTTATGGCAGATATTGGTGCACAAACCCCTTCTTCTATATTTTCA  
GAGAAAGAGAATTAATATATGATCTATTTGAAGCTGCGACGGGTATGAGAATGATGCATAATTTTTTTTCGTATCGGGGGG  
GTAGCGACTGATCTACCTTATGGTTGGGTAGATAAATGTTATGATTTCTGCGATTATTTTTTAACAAGAATTGTTGAATA  
TCAAAAACCTTATTACGCGAAATCCGATTTTTTTTAGAACGGGTTGAGGGGGTAGGTGTAGTTGATATAAAGGAAGTAATAA  
ATTGGGGTTTATCAGGACCCATGCTTCGGGCTTCCGGAATACAATGGGATCTCCGTAAAGTGGATAATTATGAATGTTAC  
GAAGAATTTGATTGGGAAGTTCAATGGCAAAAAGAAGGAGATTCCTTAGCTCGTTATTTAGTTCGAATTGGTGAATGAT  
GGAATCCATAAAAATTTCAACAGGCTTTGGAAGGAATTCCCGGCGGACCATATGAAAATTTAGAAAATTCGCTGCTTTG  
AT-----AGAGAA---

AAAGAGCCAGAATGGAATGAGTTTGGATATCGATTTATTAGTAAAAAACCGTCTCCGACTTTTTGAATTGCCAAAACAAGA  
ACTTTATGTAAGAATTGAAGCCCCCAAGGGAGAATTGGGAATTTTTCTAATAGGGGATCAAAAATGGTTTTCCCTGGAGAT  
GGAAAATTCGTCCGCCAGGTTTTATCAATTTGCAAATTTCTTCTCAATTAGTTAAAAGAATGAAATTTGGCCGATATTATG  
ACAATACTAGGTAGCATAGATATTATTATGGGAGAAGTTGATCGTTGAATGTTCTTATGGTAAGTGGATTTCATAAATTA  
TAGTCAACAAACAGTCCGAGCTGCAAGGTACATTGGTCAGGGTTTTACGATTACCCTATCTCACGCAAATAGGTACCCTG  
TAACTATTCAATATCCTTATGAAAAATAATCTCATCAGAACGTTTCCGCGGTGCAATACATTTTTGAATTTGATAAATGC  
ATTGCTTGTGAAGTATGTGTTTCGTGTATGTCCCATCGATCTACCTGTTGTTGATTGGAACTAGAACTGATATTCGAAA  
GAAACAGTTGCTTAATTATAGTATTGATTTCCGGAATCTGTATATTTTGTGGTAACTGTATTGAATATTGTCCAACAAAT  
GTTTATCAATGACCGAAGAATATGAACTTTCAACTTATGATCGCCACGAATTAATTTATAATCAAATTTGCTTTGGGCCGT  
TTACCAGTGTGAGTAATTGATGATTATACAATTAGAACAATT-----CAAATAAAAATTCGAATTA-----  
-----

-----ATGCAA---

GGTCGTTTTGCTTCTTGGCTAGTCAAACATGGACTAATTCATAGATCATTGGGTTTTCGATTACCAAGGAATCGAGACTTT  
ACAAATAAAGCCCCGAGGATTGGCATTCCATTGCTGTCAATTTTATATGTATATGGTTACAATTATCTACGTTCCCAATGTG  
CCTATGATGTAGCACCAGGAGGACTATTAGCTAGTGTATATCACCTTACGAGACTAGAGTATGGTATA---  
GATCAACCCGAAGAGGTCTGCATAAAAATATTTGTGCGCAAGAAAAATCCCAGAATTCCTTCCATTTTTCTGGGTTTTGGAA  
AAGTGCAGGATTTTCAAGAAAAGGAATCTTATGATATGTTGGGAATCTCTTATGATAATCATCCGCGTCTGAGACGATTT  
TAATGCCCCGAAAGTTGGATAGGATGGCCTTTGCGTAAAGATTATATCGCCCCAAATTTTTTATGAAATACAAGATGCTCAC  
TAA-----  
-----

-----ATGAATTCCATT---

GAGTTTCCCTTACTTGATCAAACAACCAAAAATTCAGTTATTTCA-----  
ACTACATTAATGATCTTTCAAATTTGGTCAAGATTATCCAGTTTATGGCCGCTTCTCTATGGTACTAGTTGTTGCTTCAT  
TGAATTTGCTTCATTAATAGGATCACGATTGCACTTTGATCGTTATGGACTAGTACCACGATCGAGTCCCTCGGCAAGCAG  
ACCTAATTTTAACTGCGGGCACAGTCACTATGAAAATGGCTCCTTCTTTAGTTCGATTATATGAACAAATGCCCGAACCT  
AAATATGTTATTGCTATGGGAGCATGTACAATTACAGGGGGGATGTTTAGTACCGATTCTTATAGTACT---  
GTTCCGGGGCGTGGATAAACTAATCCCAGTGGATGTCTATTTGCCGGGCTGTCCACCTAAACCGGAGGCTATTATAGATGC  
TATAACAAAACCTTCGTAAGAAAATATCTCGAGAAAATATATGAAAAT---CAAATGAGTTCT-----CAACGAGAG-  
-----AATAGATGTTTTACA-----ACCAACCACAAGTTTTCATATT-----  
GGATACAGTACTCATACTGGCAATTATGGTCAAGAATTATTCTATCAA-----  
-----CTGCCATCT-----ACTTCAGAGATA---CCATCT-----  
--GACACA-----TTTTTTTAA-----  
-----

-----ATGCAA---

ACTAGAAATGCTTTTTCTTGTATAAAGGAAGGGATTACTCGATCC-----  
ATTTCCATATCGATCATG-----ATATATATAATA---  
ATTCGAGCACCCATTTCAAACGCATATCCAATTTTTGCACAGCAGGGTTATGAAAATCCCCGAGAAGCAACCGGTGCTAT  
TGTCTGTGCCAATTGCCATTTAGCTAATAAGCCCGTGGATATTGAGGTTCCACAAGCGGTACTTCCCTGATACTGTATTTG  
AAGCAGTTGTTGCAATTCCTTATGATATGCAAGTGAACAAGTTCTTGCTAATGGTAAAAAGGGAGCTTTGAATGTGGGG  
GCTGTTCTTATTTTACCAGGAAGGTTTTGAATTGGCACCCCT---  
GATCGTATTTGCGCTGAGATTAAGAGAAGATAGGC---AATCTGTCT---TTTCAAAC---  
TATCGTCTACAAAAAAAATATTCTTGTGGTAGGCCCTGTTCTGTTGTTCAAAAATATAAAGAAATCACCTTTTCTATTCT  
TTCC

Gossypium TTGTTTCCGGAATATTTACA---

GCATTCCTTTTATATAAACCTTTTTATTTCATCTGTACAAAATTTAAACTTACTAAATTCATTTGTG-----  
AAAAGGGTCTCTAAA---AGA-----  
ATTTTATTGGATAAAAATGATATATTTGATATATGATTGGTCAATAATCGTGGTTACATAGATATGTTTTATTCAATATC  
CTTAACAAAAGGTATAAGAGGATTGGCCGAACTAATCATTTTTTTTGATAGGCGAGTAATCGATGGAATTACAAATGGAG

TAGGCATTACAAGTTTTTTTTGTGGGAGAAAGTGTAAAATATCTAGGGGGAAGTCGCATCTCGTTTTATCTATTATTGTAT  
TTAGTTTTATGTATTCATTTTTTTTTAGTAATTTCTACTTTATTTTTATTTTAA-----

-----  
ATGGATTTGCCTGGACCAATACACGATTTTCTTTTAGTTTTCTGGGATCGGGTCTTATATTAGGAGGCCTGGGAGTGGT  
ATTACTTACCAATCCAATTTATTCTGCCTTTTCATTGGGATTGGTTCTT---GTTTGTATATCCTTA---  
TTTTATATTCTCTCAAATTTCTCATTTTTGTAGCTGCTGCCAGCTCCTTATTTATGTGGGAGCCATAAATGTTTTAATCCT  
ATTTGCTGTGATGTTTCATGAATGGTTCAGAATATTATAAAGATTTTAATCTG-----  
TGGACCATTGGGAATGGCCTTACTTCGTTGGTTTTGTACAAGTATTCTTGTTCGCTAATTACTACTATATTAGATACATC  
ATGGTACGGGATTATTTGGACTACAAGATCAAATCAAATTATAGAACAAGATTTGATAAGTAATAGTCAACAAATTTGGAA  
TTCATTTAGCAACCGATTTTTTCTTCCATTTGAATTCATTTCAATAATTTCTTTTAGTTGCTTTGATAGGTGCAATTGCT  
GTGGCTCGTCAGTAA-----

-----ATGAAT-----  
CTATCAGCTACAGAAAAAGACCTTATGATAGTCAATATGGGGCCTCACCACCCATCAATGCATGGTGTCTTCTCGTCTCAT  
CGTTACTCTAGATGGTGAAGATGTTGTTGACTGTGAACCAATATTAGGTTATTTACACAGAGGAATGGAAAAAATTGCGG  
AAAACCGAACAATTATACAATATTTGCCTTATGTAACGCGTTGGGATTATTTAGCCACTATGTTACGGAAGCAATAACC  
GTAAATGGACCAGAACAGTTGGGGAATATTCAAGTCCCTAAAAGGGCCAGCTATATCAGAGTAATTATGTTGGAGTTGAG  
TCGTATAGCTTCTCATCTATTATGGCTTGGACCTTTTTATGGCAGATATTGGTGCACAGACCCCTTTTTCTATATTTTCA  
GAGAAAGAGAATTAGTATATGATCTATTTCGAAGCTGCCACCGGTATGAGAATGATGCATAAATTTTTTCGTATCGGAGGA  
GTGGCGGCCGATCTACCTTACGGCTGGCTAGATAAATGTTTGGATTTCTGTGATTATTTTTAACAGGAATTGTTGAATA  
TCAAAAACCTTATTACGCGAAATCCTATTTTTTTAGAACGAGTTGAAGGGATAGGCGTTATTGGTGGAGAAGAAGCAATAA  
ATTGGGGTTTATCCGGCCCAATGCTACGAGCATCTGGAATCAAATGGGATCTTCGAAAGTTGATCATTATGAGTGTAC  
GACGAATTTGATTGGGAAATCCAGTGGCAAAAAGAAGGAGATTATTAGCTCGTTATTTAGTCCGAATCAGTGAATGAC  
GGAATCTATAAAAATAATTCAACAGGCCCTGGAAGGAATTCGGGTGGTCCCTATGAGAATTTAGAAATCCGATGCTTTG  
AT-----CGAGAA---

AGGGATCCAGAATGGAATGATTTTGAATATCGATTATTAGTAAAAAACCTTCTCCACATTTGAATTACCGAGACAAGA  
ACTTTATGCGAGAATGGAAGCCCCAAAGGGAGAATTAGGAATTTTTCTGATAGGGGATCAAAGCGGTTTTCTTGGAGAT  
GGAAAATTCGCCCGCCGGGTTTTATCAATTTGCAAATTTCTCCTCAGTTAGTTAAAAGAATGAAATGGCTGATATTATG  
ACGATACTAGGTAGCATAGATATCATTATGGGAGAAGTGGATCGTTGAATGTTCCCTATGGTAACTGGGTTTCATGAATTA  
TGCCACCAAAACAGTCCGAGCAGCAAGGTACATTTGGTCAAGGTTTCATGATTACCTTATCCCACGCAAATCGTTTACCCG  
TAACTATTCAATATCCTTATGAAAAATTAATCACATCAGAGCGTTTTCCGCGGACGAATCCATTTTGAATTTGATAAATGC  
ATTGCTTGTGAAGTATGTGTTTCGTGTATGCCCTATAGATCTACCCGTTGTTGATTGGAAATTTGAAACGGATATTCGAAA  
AAAACGATTGCTTAATTACAGTATTGATTTTCGGAATTTGTATATTTTGTGGTAACTGCGTTGAGTATTGTCCAACAAAT  
GTTTATCAATGACTGAAGAATATGAACTTTCTACTTACGACCGTCACGAATTGAATTATAATCAAATTTGCTTTGGGCCGT  
TTACCAATGTCAGTAATTGACGATTATACAATTCGAACAGTTTTTGAATTCAAATTCAAAGAAAAACTCAGTAA-----

-----ATGCAG---  
GGTCGTTTTGTCTGTTTGGCTAGTCAAACACGGGCTAGTTCATAGATCTTTGGGCTTCGATTACCAAGGAATAGAGACTTT  
ACAAATAAAGCCTGAGGATTGGCATTCCATTGCTGTTATTTTATATGTATATGGTTACAATTATCTACGTTCCCAATGTG  
CCTATGATGTAGCACCAGGCGGACTGTTAGCCAGTGTGTATCATCTTACGAGAATAGAGTATGGTGTAA---  
GATCAACCGGAAGAGGTATGTATAAAAGTATTTGCTCCAAGGAGTAACCCTAGAATTCGGTCTGTTTTCTGGGTTTGGAA  
AAGTTCGGATTTTCAAGAACGAGAATCTTATGACATGTTGGGAATCTCTTATGAAAATCATCCACGACTGAAACGTATCT  
TAATGCCCGAAAGTTGGATAGGGTGGCCTTTACGTAAGGATTACATTGCCCCCAATTTTTTATGAAATACAAGACGCTCAT  
TGA-----

-----ATGAATTCATC---  
GAATTTCCCTTACTTGATCGAACAACCCAAAATTCAGTTATTTTCA-----  
ACTACATTAATGATCTTTCAAATTTGGTCAAGACTCTCCAGTTTTATGGCCGCTTCTTTATGGTACCAGTTGTTGCTTTAT  
TGAATTTGCTTCATTAATAGGCTCACGCTTCGACTTTGATCGTTATGGGCTGGTACCAAGATCGAGTCTTAGACAGGCAG  
ACCTAATTTTAAACAGCTGGAACAGTAACAATGAAAATGGCGCCCTCTTTAGTGAGATTATATGAACAAATGCCCGAACCT  
AAATATGTTATTGCTATGGGCGCGTGTACAATTACAGGAGGGATGTTTCAGTACTGATTCTTATAGTACT---  
GTTCCGGGGGGTTCGATAAGCTAATTTCCCGTGGATGTCTATTTGCCGGGCTGTCCCCCTAAACCCGAGGCAGTTATAGATGC  
TATAACAAAACCTTCGTAAGAAAATATCTCGCGAAATCTATGAAGAT---CGAATTAGATCT-----CAACAGGGG-  
-----GATCGGTGTTTTACT-----ACCAATCACAAGTTTTGTCTT-----  
GTACGCAGTACTCGTACTGGAAATTATAATCAAGGATTGCTCTATCAA-----  
-----CCACCATCT-----ACTTCAGAGATT---CCTCCT-----  
--GAAACA-----TTTTTCAACTACAAG---GGTTCATATCTTCC-----CACGAATTAGTAAATTAG-----  
-----ATGCAA---

ACTAGAAATACTTTTTCTTGGATAAAGGAGGAGATTACTCGATCC-----  
ATTTCCGTATCGCTCATG-----ATCTATATAATA---  
ACCGGGGCTTCCATTTCAAATGCATATCCCATTTTTGCGCAGCAGGGGTATGAAAATCCACGAGAAGCAACTGGGCGTAT  
TGTATGTGCCAATTGCCATTTAGCGAATAAACCCGTGGATATTGAGGTTCCACAAGCGGTACTTCTGATACTGTATTTG  
AAGCGGTTGTTAGAATTCCTTATGATATGCAACTGAAACAAGTTCTTGCTAATGGTAAGAAAGGGGCTTTGAATGTGGGT  
GCTGTTCTTATTTTACCAGAGGGGTTTGGATTAGCCCCGCT---  
GATCGTATTTCCGCCGAGATGAAAGAAAAGATAGGC---AATCTGTCT---TTTCAGAAC---  
TACCGCCCCACTAAGAAAAATATTCTTGTGATAGGTCTGTTCTCGGTAAAAAATATAGTGAATCACCTTTCCTATTCT  
TTCC  
Helianthus CTGTTTCGGAATATATATA---  
GCATTTTTTTTTATATAAACCTGTTTATTCATCTTTTCAAATTTGGACTTAATTAATTCAGTTGTT-----  
AAAATGGTCTAAG---AGA-----  
ATTTTTCTGACAAAATAAAAAATGCTATATATGATTGGTCAATAATCGGGGTTACATAGATGCCTTTTATGGAACATT  
CTTCACTGCGGGGGTGCGAAAATTGGCCGAATTTACTCATTTTTTTGATAGACGAATAATTGATGGAATTCCAAATGGAG  
TTGGGTTTATGAGTTTCTTTGTAGCAGAGGTTATTAATCGGTAGGGGGTGGACGCATTTCTTCTTATTTGTTCTTTTAT  
TTTTCTTATGTATCAATCTTTTTATTAATTTATTACTTTTTAAATCTTTAA-----  
-----  
ATGGATTTACCTGGACTAATACACGATTTTCTTTTAGTCTTTCTGGGATTGGGTCTTATATTAGGGGGTCTGGGAGTAGT  
ATTACTTGCCAATCCCATTTTATTCTGCCTTTTTCATTGGGATTGGTTTTT---GTTTGTATATCGTTA---  
TTCTATATTCTATCGAACTCCCATTTTGTAGCTGCCGCGCAGCTCCTTATTTACGTAGGAGCCATAAATGTTTTAATCAT  
TTTTGCTGTGATGTTCAATAATGGTTCAGAATATTCCAAAGATTTCCATCTT-----  
TGGACCGTGGGAGATGGAGTAACTTCCGTGGTCTGTACAAGTCTTTTTGTTTCACTAATTACTACTATTCCAGATACGTC  
ATGGTACGGGATTATTTGGACTACAAAAGCAAACCAGATTATAGAGCAAGATCTGATAAGTAATAGTCAACAAATCGGGA  
TTCATTTATCAACAGATTTTTTTTATTCCGTTTGAATTCATTTCAATAATTCTTTTAGTTGCGTTAATCGGCGCAATTGCT  
GTAGCTCGTCAATA-----  
-----ATGACT-----  
GTACCATCTACAAGAAAAGACCTCATGATAGTCAATATGGGACCTCACCACCCATCAATGCATGGTGTCTTTCGACTCAT  
TGTTACTCTAGATGGTGAAGATGTTATTGACTGTGAACCAATATTGGGTTATTTACACAGAGGTATGGAAAAAATTGCGG  
AAAATCGAACAATTATACAATATTTGCCTTATGTAACACGTTGGGATTATTTAGCTACTATGTTTACAGAAGCAATAACT  
GTAATGCGCCAGAGCAATTAGGCAATATTCAAGTCCCTAAAAGGGCCAGTTATATCAGAGTCATTATGTTGGAGTTAAG  
TCGTATAGCTTCGCATTTGTTATGGCTTGGCCCTTTTATGGCAGATATTGGGGCGCAGACTCCTTTCTTCTATATTTTC  
GAGAAAGAGAATTAATATATGACCTATTGCAAGCTGCCACCGGTATGCGGATGATGCACAATTTTTTTTCGTATTGGTGG  
GTCGCTGCTGATTTACCTCATGGCTGGATAGATAAATGTTTGGATTTTTGCGATTATTTTTTAAACAGGAATTGCTGAATA  
TCAAAGCTTATTACACGGAATCCCATTTTTTTTAGAACGAGTTGAAGGAGTAGGCATTATTGGTGGAGAGGAAGCAATAA  
ATTGGGTTTGTGCGGACCAATGCTACGAGCTTCCGGAATAGAATGGGATCTTCGTAAAGTTGATCATTATGAGTGTTAC  
GATGAATTTGATTGGGAAGTCCAATGGCAAAAAGAGGGGGATTGTTAGCTCGTTATTTAGTACGAATCAGCGAAATGAC  
AGAATCCATAAAAATTTATTCAACAGGCCCTAGAAGGAATTCGGGAGGGCCCTATGAAAATTTAGAAATCCGCCGCTTG  
AT-----AGAGTA---  
AAAGATACTGTATGGAATGAGTTTACTATCGATTTCATTAGTAAAAAACCTTCTCCGACTTTTGAATTGTGCAAGCAAGA  
ACTTTATGCGAGAGTCAAGCACCAAAGGGAGAATTGGGAATTTTTTTGATAGGAGATAAGGGTGTTTTTCTTGGCGAT  
ATAAAATTAGGCCGCCGGGATTTATTAATTTGCAAATTTCTTCTCAGTTAGTTAAAAGAATGAAATTTGGCTGATATTATG  
ACGATACTAGGTAGTATAGATATCATTATGGGAGAAGTTGATCGTTAAATGTTTCTTATGGTAACTGAGTTCATGAATTA  
TGGCCAACAAACAGTACGAGCTGCAAGGTATATTGGTCAAGTTTTCATGATTACCTTATCACACGCGAATCGTTTACCTG  
TAACTATTCAATACCCCTACGAAAAATTGATCACATCCGAGCGTTTCCGCGGTGCAATCCACTTTGAATTTGATAAATGC  
ATTGCTTGTGAAGTATGTGTTTCGTGTATGTCCTATAGATCTACCCGTTGTTGATTGGAAATTTGGAACTGATATTAGAAA  
GAAACGATTGCTTAATTACAGTATTGATTTCCGGAATATGTATATTTTGTGGTAATTGCGTTGAGTATTGTCCAACAAAT  
GCTTATCAATGACTGAAGAATATGAACTTTCTACTTATGATCGTCACGAATTGAATTATAATCAAATTTGCTTTGGGTCGG  
TTACCAATGTCAATAATTGACGATTACACAATTCGAACAATTTAAATTTGCCTGAAATAAAAACTTAA-----  
-----  
-----ATGCAG---  
GGTAATTTGTCTGCTTGGCTAGTTAAGCATGCGCTAATTCATAGATCTTTGGGCTTTGATTACCAAGGAATAGAGACTTT  
ACAAATCAAACCGGGGATTGGCATTCCATTGCTGTCAATTTTATATGTATATGGTTACAATTATCTCCGCTCCCAATGTG  
CCTATGATGTAGCACCGGGCGGACTATTAGCTAGTGTGTATCATCTTACTAGAATAGAGTATGGCGTG---  
GATCAACCAGAAGAGGTATGCATAAAAGTATTTGCCCGAGGAAGGATCCTAGAATTCGGTCTGTTTTCTGGGTTTGGAA  
AAGTGTGGATTTTCAAGAACGGGAATCTTATGATATGTTGGGAATCTCTTATGATAATCATCCAGTTTGAACGTATCT  
TAATGCCTGAAAGTTGGATAGGATGGCCTTTACGTAAGGATTATATTGCTCCCAATTTTTTATGAAATACAAGATGCTCAT  
TGA-----







GACGAATTTGATTGGGAGGTTCAATGGCAAAAAGAGGGGGATTTCATTGGCTCGTTATTTAGTACGAATCAGTGAAATGAC  
AGAATCCATAAAAATTATCCAACAGGCCCTGGAAAGAATTCCAGGGGGGCCCTTTGAGAATTTAGAAATCCGACGCTTTG  
AT-----AGAATA---

AAAGATACTGAATGGAATGATTTTGAATATCGATTTATTAGTAAAAAACCTTCTCCAACCTTTTGAATTGTCCAAACAAGA  
ACTTTTATGTAAGAGTCGAAGCACCAAAAGGAGAATTGGGAATTTTTCTGATAGGAGATCAGAGTGTTTTTCTTGGCGAT  
GGAAAATTCGCCACCAGGGTTTTATCAACTTGCAAATTTCTTCTCAGTTAGTTAAAAGAATGAAATTTGGCTGATATTATG  
ACTATACTAGGTAGTATAGATATCATTATGGGAGAAGTTGATCGTTGAATGTTTCTATGGTAACTGAGTTCATGAATTA  
TGGTCAACAAACAATACGAGCTGCAAGGTACATTGGTCAAGGTTTCATGATTACCCTCTCCCACGCGAATCGTTTACCTG  
TAACTATTCAATACCCATACGAAAAATTGATCACATCAGAACGTTTCCGAGGACGAATCCACTTTGAATTTGATAAATGC  
ATTGCTTGTGAGGTATGTGTTTCGTGTATGTCTATAGATTTACCCGTTGTTGATTGGAAATTTGGAAACGGATATTCGAAA  
GAAACGATTACTTAATTACAGTATTGATTTTGGAACTCTGTATATTTTGTGGTAATTGCGTTGAGTATTGTCCAACAAAT  
GTTTATCGATGACCGAAGAATATGAACTTTCTACTTATAATCGTCACGAATTGAATTATAATCAAATTTGCTTTAGGCCGA  
TTACCGGTGTCAATAATTGACGATTACACAATCCGAACAATTTGAGCTCACCTCAAATAAAAAATGGATAA-----

-----ATGCAA---

GGCCGTTTGTCTGCTTGGCTAGTCAAGCGTGGGCTAATTCATAGATCTTTGGGCTTTGATTATCAAGGAATAGAGACTTT  
ACAAATAAAGCCCAAGGATTGGCATTCCATTGCTGTCAATTTTATATGTATATGGTTACAATTATCTACGCTCTCAATGTG  
CCTATGATGTAGCACCTGGCGGACTGTTAGCTAGTGTGTATCATCTTACGAGAATAGAGTATGGTGA---  
GATCAACCAGAAGAGGTATGCATCAAAGTATTTGCCTCAAGGAGGAATCCTAGAATTCGCTCGGTTTTCTGGGTTTGGAA  
AAGTGTGATTTTCAAGAACGAGAATCTTACGATATGCTGGGAATCTCTTATGATAATCATCCACGCTTGAACGATATCT  
TAATGCCGAAAGTTGGATAGGATGGCCCTTACGTAAGGATTATATTGCCCCCAATTTTTTATGAAATACAAGATGCTCAT  
TGA-----

-----ATGAATTCATT---

GAGTTTCCTTTACTTGATCAAACAGTCCAAAATTCGTTTTTTCA-----  
ACTACATTAATGATCTTTCAAATTTGGTCAAGACTCTCGAGTTTATGGCCGCTTCTCTATGGTACCAGTTGTTGTTTTAT  
TGAATTTGCTTCACTAATAGGATCAGATTCGACTTTGATCGTTATGGATTAGTACCAAGATCGAGTCTAGACAAGCAG  
ATCTCATTTTTAACGCCGGACAGTAACAATGAAAATGGCACCCCTCTTATGAGATTATATGAGCAAATGCCCGAACC  
AAATATGTTTATTGCTATGGGAGCCTGTACAATTACAGGAGGGATGTTTCAGTACCGATTCTTATAGTACT---  
GTTTCGGGGAGTCGATAAATTAATTTCCCGTGGATGTCTATTTGCCAGGTTGTCCACCTAAACCGGAAGCAGTTATAGATGC  
TATAACAAAATTCGTAAGAAAATATCTCGAGAAATCTATGAAGAT---AGAATTCGGTCT-----CAACAAGCA-  
-----AATCGGTGTTTTACT-----ACCAATCACAAGTTTCATGTT-----  
GGACGCAGTATGAATACTGGAAATTATGATCAAGGATTCCTTTATCAA-----  
-----CCACCATCT-----ACTTCAGAGATC---CCTACT-----  
--GAAACC-----TTTTTGAATAG-----  
-----ATGCAA---

ACTAGAAAGACTTTTTCTTGGATAAAGGAACAGATTGCTCGATCT-----

ATTTCCGTATCGCTCCTG-----ATATATATCATA---

ACTCGGACATCCATTTCAAGTGCATATCCATTTTTGCGCAGCAGGGTTATGAAAATCCACGAGAAGCGACTGGGCGTAT  
TGTATGTGCCAATTGCCATTTAGCTAATAAGCCCGTGGATGTTGAGGTTCCACAAGCGGTACTCCCTGATACTGTATTTG  
AAGCAGTTGTTTCAATTCCTTATGATAAGCAACTGAAACAAGTTCTTGTCAATGGTAAGAAAGGGGGTTTGAATGTAGGG  
GCTGTTCTTATTTTACCGGAGGGGTTTGAATTAGCCCCTACC---  
GATCGTATTTCTCCCGAGATGAAAGAAAAGATAGGC---AATTTGTCT---TTTCAGAGC---  
TATCGCCCAATAAAAAAATATTCTTGTGATAGGGCCTGTGCCTGGTCAGAAATATAGTGAATCATCTTTTCTATTCT  
TTCC

Lactuca CTCTTTTCGGAATATTTATA---

GCCTTTTTTTTTATATAAACCTGTTTATTCATCTTTTCAAATTTGGAGTTTCTTAATACATTTGTT-----

AAAATGGGTCTAAT---AGA-----

ATTTTTTATGACAAAATAAAAAATCTATATATGATTGGTCAATAATCGGGGTTACATAGATGCCTTTTATGGAAGATT  
CTTAACTGCGGGGATTAGAAAATGGCCAACCTTTGCTCATTTTTTTGATAGACGAATAATTGATGCAATTCCAAATGGAG  
TTGGTCTTATGAGTTTCTTTGGAGCAGAGGTTATTAATCGGTAGGGGGTGGGCGTATTTCTTCTTATCTGTTCTTTTAT  
TTTTCTTATGTAGCAATTTTTTTTATTAATTTACTATTTTTTCAATGTTTTGA-----

ATGGATTTACCTGGACTAATACATGATTTTCTTTTGTCTTTCTGGGATTGGGTCTTATATTAGGGGGTCTGGGAGTAGT  
ATTACTTCCAATCCTATTTTATTCTGCCTTTTCTGTTGGGATTGGTTTTT---GTTTGTATATCTTTA---  
TTCTATATTCTATCAAACCTCCATTTTGTAGCTGCTGCGCAGCTCCTTATTTACGTAGGAGCCATAAATGTTTTAATAAT  
TTTTGCTGTGATGTTTATAAATGGTTTCAAGATATTCCAAAGATTTCCATCTT-----

TGGACCGTTGGAGATGGAATAACTTCGGTGGTATGTACAAGTCTTTTTGTTTCACTAATTACTACTATTCCAGATACGTC  
ATGGTACGGAATTATTTGGACTACAAAAGCAAACCAGATTATAGAACAAGATTTGATAAGTAATAGTCAACAAATTGGGA  
TTCATTTATCAACAGATTTTTTTCTCCGTTTGAATTCATTTCAATAATCTTTTAGTTGCGTTAATCGGCGCAATTGCT  
GTAGCTCGTCAATAA-----

-----ATGACT-----

GGACCAGCTACAAGAAAAGACCTCATGATAGTCAATATGGGACCTCACCACCCATCAATGCACGGTGTCTTCGACTCAT  
TGTTACTCTAGATGGTGAAGATGTTATTGACTGTGAACCAATATTGGGTTATTTACACAGAGGTATGGAAAAAATTGCAG  
AAAATCGAACAATTATACAATATTTGCCTTATGTAACACGTTGGGATTATTTAGCTACTATGTTTACAGAAGCAATAACT  
GTAAATGCACCAGAGCAATTAGGCAATATTCAAGTCCCTAAAAGGGCCAGTTATATCAGAGTCATTATGTTGGAGTTAAG  
TCGTATAGCTTCGCATTTGTTATGGCTTGGCCCTTTTATGGCAGATATTTGGGGCGCAGACTCCCTTCTCTATATTTTTC  
GAGAAAGAGAATTGATATATGACCTATTGGAAGTGCACCGGTATGCGAATGATGCACAATTTTTTTTCGTATTGGTGGGA  
ATCGTCTGATTTACCTCATGGGTGGATAGATAAATGTTTGGATTTTTGCGATTATTTTTAACAGGAATTGCTGAATA  
TCAGAAGCTTATTACACGGAATCCATTTTTTTTAGAACGAGTTGAAGGAGTAGGCATTATTGGTGGAGAGGAAGCAATAA  
ATTGGGGTTTGTGGGACCCATGCTACGAGCTTCCGGAATACAATGGGATCTTCGTAAAGTTGATCATTATGAGTGTTAC  
GACGAATTTGATTGGGAAGTCCAATGGCAAAACGAAGGGGATTATTAGCTCGTTATTTAGTACGAATCAGTGAAATGAC  
AGAATCCATAAAAATTATTCAACAGGCCCTAGAAGGAATTCCGGGAGGGCCCTATGAAAATTTAGAAATCCGCCGCTTTG  
AT-----CGAGTA---

AAAGATACTGTATGGAATGAGTTTACTATCGATTATTAGTAAAAAACCTTCTCCGACTTTTGAATTGTGCAAGCAAGA  
ACTTTTATGCGAGAGTCAAGCACCAAAGGGAGAATTGGGAATTTTTCTGATAGGAGATAAGGGTGTTTTTCTTGGCGCT  
ATAAAATTCGCCACCAGGGTTTATTAATTTGCAAATCTTCTCAGTTAGTTAAAAGAATGAAATTGGCTGATATTATG  
ACGATACTAGGTAGTATAGATATCATTATGGGAGAAGTTGATCGTTAAATGTTCCCTATGGTAACTGAGTTCATGAATTA  
TGGCCAACAAACAGTACGAGCCGCAAGGTATATTGGTCAAGGTTTCATGATTACCTTATCACACGCGAATCGTTTACCTG  
TAACTATTCAATACCCCTACGAAAAATTGATCACATCCGAGCGTTTCCGCGGACGAATCCACTTTGAATTTGATAAATGC  
ATTGCTTGTGAAGTATGTGTTTCGTGTATGTCCTATAGATTTGCCCGTTGTTGATTGGAAATTGGAACTGATATTAGAAA  
GAAACGATTGCTTAATTACAGTATTGATTTCCGGAATATGTATATTTTGTGGTAATTGCGTTGAGTATTGTCCAACAAATT  
GTTTATCAATGACTGAAGAATATGAACTTTCTACTTATGATCGTCACGAATTGAATTATAATCAAATTGCTTTGGGTCGT  
TTACCAATGTCAGTAATTGATGATTACACAATTCGAACAATTTCAATTTGCCTGAAATAAAAACTTAA-----

-----ATGCAG---

GGTCATTTGTCTGCTTGGCTAGTTAAGCATGGGCTAATTCATAGATCTTTGGGCTTTGATTACCAAGGAATAGAGACTTT  
ACAAATCAAACCGGGGATTGGCATTCCATTGCTGTCAATTTATATGTATATGGTTACAATTATCTCCGCTCCCAATGTG  
CCTATGATGTAGCACCAGGCGGACTATTAGCTAGTGTGTATCATCTTACTAGAATAGAGTATGGCGCG---  
GATCAACCAGAAGAGGTATGCATAAAAGTATTTGCCCGAGGAGGGATCCTAGAATTCCTGCTGTTTTTTTGGGTTTGGAA  
AAGTGTGGATTTTCAAGAACGGGAATCCTATGATATGTTGGGAATCTCTTATGATAATCATCCCGTTTGAACGTATAT  
TAATGCCTGAAAGTTGGATAGGATGGCCTTTACGTAAGGATTATATTGCTCCCAATTTTTTATGAAATACAAGATGCTCAT  
TGA-----

-----ATGAATTCATT---

GAGTTTCCCTTATTTGATCGAACAACCCAAAATTCAGTTATTTCA-----  
ACTACATTAATGATCTTTCAAATTTGGTCAAGACTCTCTAGTTTATGGCCGCTTCTCTATGGTACCAGTTGTTGCTTCAT  
TGAATTTGCTTCACTAATAGGCTCACGATTGACTTTGATCGTTATGGACTAGTACCAAGGTCGAGTCCTAGACAAGCGG  
ACCTTATTTTAAACAGCCGGAACAGTAACAATGAAAATGGCCCTTCTTAGTGAGATTATACGAGCAAATGCCTGAACCA  
AAATATGTTATTGCTATGGGAGCATGTACAATTACAGGGGGGATGTTTCAGTACCGATTCTTATAGTACT---  
GTTTCGTGGAGTCGATAAGCTAATTCCTGTGGATGTATATTTGCCGGGCTGTCCACCTAAACCAGAAGCAATTATAGATGC  
TATAACAAAATTCGTAAGAAAATATCTCGAGAAATCTATCCAGAT---AGAACTATGTCT-----CAGCGAGAG-  
-----AATCGTTGTTTTACT-----ACCAATCACAAGTTTCAGGTT-----

GGGCATAGTATTCATACTGGAAATTATGATCAAGGATTCCTTTATCAA-----  
-----CCGACATCT-----ACTTCAGAGATT---CCTCCT-----  
--GAAACA-----TTTTTCAAATACAAA--AGTTTCAGTATCTTC-----CCCGAATTAGTAAATTAG-----

-----ATGCAA---

ACTAGAAATAATTTTTCTTGGATAAAGGAACAGATTACTCGATCT-----  
ATTTCCGTATCGCTCATG-----ATATATATCATA---  
ACTCGTGCATCCATTTCAAATGCATATCCCATTTTTGCGCAGAAGGGCTATGAAAATCCACGAGAAGCGACTGGACGTAT  
TGTATGCGCCAATTGCCATTTAGCTAATAAACAGTGGATATTGAGGTTCCGCAAACGGTACTTCCCATACTGTATTTG  
AAGCAGTTGTTTCGAATTCCTTATGATATGCAACTGAAACAAGTTCTTGCTAATGGTAAAAAAGGGGCTTTAAATGTGGGG  
GCTGTTCTTATTTTACCAGAGGGTTTTGAATTAGCCCCTCCC---  
GATCGTATTTCCCGGAGATAAAAGAAAAGATGGGC---AATCTGTCT---TTTCAGAGC---

TATCGCCCAAATCAAAAAAATATTCTTGTTCATAGGCCCTGTTCTGGTCAGAAATATAGTGAAATCACGTTTCCTATTCT  
TTCCC

Liriodendron CTATTTCCGAATATTCATA---

GCATCTCTTTTATATGGGTCTGTTTATTCATCTTTTCAGAATTTAGACTTAATTAATTCATTTGTT-----

AAAATAGGTCCTAAG---AGA-----

CTTTTCTTGGACCGAATAATAAATGTAATATACAATTGGTTCATATAATCGTGGTTACATAGATGTTTTTTATGCAACATT  
CTTAATAAGGGTATAAGAGGATTAGCCGAACATAAATTTTTTTGATAGACGAGTAATTGATGGAATTACGAATGGTG  
TTGGTATTGCAAGTTTCTTTGTAGGAGAAGGTATCAAATATGTGGGGGGCGGACGAATCTCTTCTTATCTTTTCGTGTAT  
TTATCTTATGTATCAACCTTTTATTAATTTACTATTTCTATTTTTTTGAATCGATAA-----

ATGGATTTACCTGGACCAATACATGATATTCTTTTAGTATTTCTAGGGTCAGGTCTTATATTAGGAGGCCTAGGGGTGGT  
ATTACTTACCAATCCAATTTATTCTGCCTTTTCATTGGGATTGGTTCTT---GTTTGTATATCCTTA---

TTCCATATTCCATCTAACTCCTATTTTGTAGCTGCTGCACAGCTCCTTATTTACGTGGGAGCCGTAAATGTCTTAATCGT  
ATTTGCTGTGATGTTTATGAATGGTTTCAAGATTTCCAAAGATTTATATCTT-----

TGGACAGTTGGAGATGGAGTTACTTCACTGGTTTGTACAAGTATTCTTTTTTCACTAATTACTACTATCTCAGATACGTC  
ATGGTACGGGATTATTTGGACTACAAGATCAAACCAGATTATAGAGCAGGACCTGACAAGTAACGTTCAACAAATTGGAA  
TTCATTTATCAACAGATTTTATCTTCCATTTGAACTCATTCTATAATTCTTTTAGTTGCCTTGATAGGTGCAATTTCT  
ATGGCTCGTCAGTAA-----

-----ATGACT-----

GTACCGGATATAAGAAAAGACTTTCATGATAGTCAATATGGGTCTCACCACCCATCAATGCATGGTGTCTTTCGACTCAT  
CGTTACTCTAGATGGTGAAGATGTTATTGACTGTGAACCCGATTGGGTTATTTACACAGAGGGATGGAAAAAATTGCGG  
AAAACCGAACAATTATACAGTATCTACCTTACGTAACACGTTGGGATTATTTAGCTACTATGTTTACAGAGGCAATAACC  
GTAAATGCACCAGAACAATTGGGAAATATTCAAGTACCTAAAAGAGCCAGCTATATCAGAGTCATTATGCTGGAGTTGAG  
TCGTATAGCTTCTCATTTGTTATGGCTTGGTCTTTTATGGCGGATATCGGTGCACAGACTCCTTTCTTCTATATTTTCA  
GAGAGAGGGAATTGCTATATGATCTATTGCAAGCTGCCACAGGTATGCGAATGATGCATAATTATTTCCGTATCGGGGA  
GTAGCTGCCGATCTACCTCATGGATGGATAGATAAATGTTTGGATTTCTGCGATTATTTTAAACAGGAGTTGTTGAATA  
TCAAAGCTTATTACGCGGAATCCCATTTTTTGGAAACGAGTTGAAGGAGTGGGCATTATTGGTGGAGAGGAAGCAATAA  
ATTGGGGTTTATCAGGACCAATGCTACGAGCTTCCGGAATACAATGGGATCTTCGTAAAATTGATCATTATGAGTGTAC  
GATGAATTGATTTGGGAAGTCCAATGGCAAAAAGAAGGAGACTCATTAGCTCGTTATTTAGTACGAATCAGTGAATGGC  
GGAATCCATAAAAAATTATCAACAGGTTCTGGAAGGAATTCCGGGGGGCCCTATGAGAATTTAGAAGTCCGTGCTTTG  
AT-----AAAGCA---

AGGGATTCCGAATGGAATGATTTTGAATATCGATTTCATTAGTAAAAAGCCTTCTCCCCTTTTGAATTGTCCAAACAAGA  
ACTTTATGTGAGAGTAGAAGCCCCAAAAGGAGAATTGGGAATTTTTCTGATAGGAGATAATAGTGTTTTTCCCTGGAGAT  
GGAAAATTTCGTCCACCCGGTTTTCATCAATTTGCAAATTTCCCTCAGCTAGTTAAAAGAATGAAATTGGCTGATATCATG  
ACGATACTAGGTAGTATAGATATCATTATGGGAGAAGTTGATCGTTGAATGTTCCCTATGATGACCGGGTTCATGAATTA  
TGGTCAACAAACAGTACGAGCTGCAAGGTACATTGGTCAAAGTTTTCATGATTACCTTATCCCACGCGAATCGTTTACCTG  
TAATATTCAATATCCTTATGAAAAATCGATCACATCAGAGCGTTTCCGCGGTGCAATCCACTTTGAATTTGATAAATGC  
ATTGCTTGTGAAGTATGTGTTTCGTGTATGCCCATAGATCTACCCGTTGTTGATTGGAGATTGGAAACAGATATTAGAAA  
GAAACGATTACTTAATTATAGTATTGATTTCCGAATCTGTATATTTTGTGGTAACTGCGTCGAGTATTGTCCAACAACT  
GTTTATCAATGACTGAAGAATATGAACTTTCTACTTATGATCGTCACGAATTGAATTATAATCAAATTGCTTTGGGTCGG  
TTACCAATGTCAGTAATTGGCGATTACACAATTCGAACAATTATGAATTCGACTCAAATAAAAAATAGCCACGGATAACCC  
CCTTGATTCAAGAACGATTACCAATTACTAA-----

-----ATGCAG---

GGTCGTTTCATCTGCTTGGCTAGTCAAGCATGAGCTAGTTCATAGATCTTTGGGCTTCGATTACCAAGGAATAGAGACTTT  
ACAAATAAAGCCCCGAGGATTGGTACTCCATTGCTGTCTATTTTCATATGTATATGGTTACAATTATCTACGTTCCCGATGTG  
CCTATGATGTAGCGCCGGCGGATTGTTAGCTAGTGTGTATCATCTTACGAAAATAGAGTATGGTGTG---

GATCAACCCGAAGAGGTATGCATAAAAAGTATTTGCCCAAGAAGGAATCCTAGAATCCCCTGCTGTTTTCTGGATTTGGAA  
AAGTGCCGATTTTCAAGAACGGGAATCTTATGATATGTTGGGAATTTCTTATGAGAATCATCCACGCCTAAAACGTATCT  
TGATGCTGAAAGTTGGATAGGCTGGCCCTACGTAAGGATTATATTGCCCAATTTCTATGAAATACAAGATGCTTAT  
TGAATGGGCAATGAGTTTCGATGATTGGGTGTATCTGTATTTATAGAAGCTTTAATTTTCGTGCTTATCCCAATTGTTG  
GTTTCAGTTTATGCATGGCGAAAAGGAGCATTGGAATGGTCTTAGCTCCTGAATATTCA---

GACAATCAAAATCAAAAAGAAGGAAAA---GATTACATTGAGACAGTTATGAATTCTATT---

GAGTTTCCGTTACTTGACCGAACAACCCAAAATTCAGTTATTTCA-----

ACTACATCGAACGATCTTTGCAATTGGTCAAGACTCTCAAGTTTATGGCCGCTTCTCTATGGTACCAGTTGTTGCTTCAT  
TGAATTTGCTTCATTAATAGGCTCGCGATTGACTTTGATCGTTATGGACTGGTACCAAGATCGAGCCCTAGGCAAGCAG  
ACCTAATTTTAAACAGCCGGCACAGTAACAATGAAAATGGCCCTTCTTTAGTGAGATTATATGAGCAAATGCCGGAACCA  
AAATATGTCATTGCTATGGGAGCTTGTACTATTACAGGAGGGATGTTTCAGTACCGATTCTTATAGTACC---

GTTCCGGGAGTCGATAAGCTAATTCCTGTGGATGTCTATTTGCCGGGTTGCCACCTAAACCAGAGGCAGTTATAGATGC  
TATAACGAAACTTCGTAAGAAAGTATCTCGAGAAATCTCTGAAGAT---AGAATTGGGTCT-----CAACAGGAA-  
-----AATCGATGTTTTACT-----ACCAATCACAAGTTTTCATGTT-----  
GGACGCAGTACTCATACTGGAAATTACGATCAAGGATTACTCTATCAA-----  
-----TCCCCCTCT-----ACTTCAGAGATA---TCTTCT----  
--GAAACA-----TTTTTCAAATACAAA---AGTTCAGTATCTTCC-----CACGAATTAGTGAATTAG-----  
-----ATGCAA---

AATAGAAATACCTTTTCTTGGGTAAAGGAACAGATGACTCGATT-----  
ATTTCCGTATCGATCATG-----ATATATGTCATA---

ACTCGGACATCTATTTCAAATGCATATCCCATTTTTGCGCAGCAGGGTTATGAAAATCCACGAGAAGCAACTGGGCGTAT  
TGTATGCGCCAATTGCCATTTAGCTAATAAAGCCCGTGGATATTGAGGTTCCACAAGCTGTGCTTCTGATACTGTATTTG  
AAGCAGTTGTTTCAATCCCTTATGATATGCAACTGAAACAAGTTCTTGCTAATGGTAAAAAGGGGGCTTTGAATGTAGGG  
GCTGTTCTTATTTTACCCGAGGGATTGCAATTAGCTCCCCC---  
GATCGTATTTCTCCCGAGATGAAAGAAAAGATAGGC---AATCTTTCT---TTTCAGAGT---  
TATCGCCCCACTAAAAGAAATATTCTTGTGGTAGGTCCTGTTTCTGGTCAGAAATATAGTGAATCGTCTTTCCCATTCT  
TTCC

Lotus           TTTTTTCGGAATCTTTATA---

GCGTCTTTTTTCTATAAACCAGTTTATTTCGACTTTACAAAATTTGAATTTATTAATTTTATTTCGAA-----  
AAGAATCTTACTAAA---AAT-----  
ATTTTAGCTGATACAATAATAAATGGCATATATGATTGGTCATATAATCGCGGCTATATAGATGGATTTTATGAAATATC  
TCTTATTGCCTCTGTAAGAAAATTAGCGAAACTAAATCTTTTTTTGATAGACAGGTAATTGATGGAATTCAAATGCAG  
TTGGTATTACAAGTTTTCTTATAGGGGAGGCTTTTTAAATATGTAGGAAGTGGGCGAATTTCTTCGTATATCTTATTTTTT  
GTATTTTTTGTATTATTATTTTAATAATTTTTTATTCTTTTTTTATATGA-----  
-----

ATGGATTTGCCCAAACGCTACATGATTTTCTTTTAGTATTTCTGGGATCGGGTCTTATATTAGGAAGTCTAGGAGTAGT  
ATTACTTACCAACCAATCTTTTCTGCTTTTTCTGTTGGGACTAACTCTT---GTTTGTATATCTTTA---  
TTGTATATTTTATCAAACCTCCCATTTTGTAGCTGCATCACAGTTACTTATTTACGTGGGAGCTATAAATGTTTTAATCAT  
ATTTGGTGTGATGTTTATGAATGTTTCCAGATATTACCAAGATTTTTCTGCTT-----  
TGGACCGTTGGCGATGGAATGACTTTGATGGTTGTACAAGTATTTTTTACTAATAACTACTATTCCAGATACATC  
ATGGTACGGGATTATTTGGACTACAAGATCCAATCAGATTATAGAACAAGATTTGATAAGTACTAGTCAACAAATTGGAA  
TTCATTTATCAACAGATTTTTTCTTCCATTTGAACTCATTTCAATAATCTTTTAGCTGCTTTAATAGGTGCAATTGTC  
GTAGCTCGCCAGTGA-----  
-----ATGAAT-----

GTCCCAGCTACAAGAAAAGACCTCATGATAGTAAATATGGGGCCTCACCATCCATCAATGCATGGTGTCTTTCGACTTAT  
TGTTACTCTGGATGGTGAAGATGTTATTGATTGTGAACCAATATTGGGTTATTTACACAGAGGAATGGAAAAAATTGCGG  
AAAATCGAACAATTATACAATATCTGCCTTATGTAACACGTTGGGATTATTTAGCCACTATGTTTACAGAAGCAATAACC  
GTAAATGGACCGGAACAGTTAGGAAATATTCAAGTGCCTAAAAGAGCCAGCTATATCCGAGTAATTATGTTAGAGTTGAG  
TCGTATAGCTTCTCACCTACTATGGTTGGGACCTTTTATGGCAGATATTGGTGCACAAACTCCTTTCTTCTATATTTTTA  
GAGAAAGGGAATTCATATATGATCTATTGCAAGCTGCGACAGGTATGAGAATGATGCATAATTTTTTTTCGTATTGGAGGA  
GTAGCGGCCGATCTACCTCACGGTTGGATAGATAAATGTTTTGATTTCTGCAATTATTTTTTACAAGGGTTGTTGAATA  
TCAAAAACCTTATTACGCGCAATCCTATTTTTTTGGAAAGGGTTGAGGGGGTGGGTGTTGTTGGTGGAGAGGAAGTAATAA  
ATTGGGGTTTATCAGGACCAATGCTTCCGGCTTCCGGAATACAATGGGATCTACGTCAAGTTGATAATTATGAGTGTAT  
GAAGAATTTGATTGGGAAGTTCAATGGCAAAAAGAGGGGAGATTCATTGGCTCGTTATTTAGTTAGAATTGGTGAATGAT  
GGAATCCATAAAAATTTCAACAGGCTTTGGAGGGGATTCCCGGCGGCCCTATGAAAATTTAGAAATCCGATGTTTTG  
GT-----AGAGAA---

AAAGAACCAGAAATGGAATGATTTTGAATATCGATTCAATTGGTAAAAAACCGTCTCCAACCTTTCGAATTGCCAAAACAAGA  
ACTTTATGTAAGAGTTGAGGCCCCCAAAGGAGAATTGGGGATTTTTTAAATAGGAGATCAAAATGGTTTTCTTGGAGAT  
GGAAAATTCGTCCACCGGTTTTATCAATTTGCAAATCTTCTCAATTAGTTAAAAGAATGAAATTTGGCTGATATTATG  
ACAATACTAGGTAGCATAGATATCATTATGGGAGAAGTTGATCGTTAAATGTTCTTATGGTAACTGGGTTTATGAATTA  
TAGTCAACAAACAGTTTCGAGCTGCAAGATACATTGGTCAAAGTTTCATGATTACCTTATCTCACGCAATCGTTTTACCGG  
TAACTATTCAATACCCTTATGAAAAATTAATAACATCGGAACGTTTCCGGGGTTCGAATCCATTTTCGAATTTGATAAATGC  
ATTGCTTGTGAAGTATGTGTTTCGTGTATGTCCTATAGATTTACCCGTTGTGGATTGGAAACTAGAAACTAATATTCGAAA  
AAAACGATTGCTAAATTACAGTATTGATTTTCGGAATCTGTATTTTTTGTGGTAACTGTATTGAGTATTGTCCAACAAT  
GTTTATCAATGACGGAAGAATATGAACTTTCCGCTTATGATCGTCATGAATTGAATTATAATCAAATTTAGCTTTAGGCCGT  
TTACCCATGTCAGTAATTGATGATTATACAATTCGAACAATT-----CAAATAAAATAA-----  
-----ATGCAA---

GGTCGTTTGTCTGCTTGGCTAGTCAAACATGGACTAGTTCATAGATCTTTGGGTTTCGATTACCAAGGAATAGAGACTTT  
ACAAATAAAGCCTGAGGATTGGCATTCCATTGCTGTTATTTTATATGTATATGGTTATAATTATCTACGTTCCCAATGTG  
CCTATGATGTATCACC GGGAGGACTGTTAGCTAGTGTGTATCATCTTACGCGAATAGAGTGTGGTATA---  
TATCAACCAGAAGAGGTATGCATTAATAATTTTGTTC AAGGAACAATCCCCGAATTCCTTCTATTTTCTGGGTTTGGAA  
AAGTGCGGATTTTCAAGAAAGGGAATCATATGATATGTTAGGAATCTCGTATGATAATCATCCTCGTCTGAAACGTATTT  
TAATGCCCGAAAGCTGGATAGGGTGGCCTTTGCGTAAAGATTATATCACCCCAATTTTTTATGAAATACAAGATGCTCAC  
TAA-----

-----ATGAATTCATT---  
GAGTTTCCCTTAATTGATCGAACAACCCAAAATTCAGTTATTTTCA-----  
ACTACATTAATGATCTTTCAAATTTGGTCAAGATTATCCAGTTTATGGCCGCTTCTCTATGGTACCAGTTGTTGCTTCAT  
TGAATTTGCTTCATTAATAGGATCACGATTCGACTTTGATCGTTATGGATTGGTACCGCGATCTAGTCCCAGGCAAGCAG  
ACCTAATTTTAAACAGCGGGCACGGTAACCATGAAAATGGCTCCTTCTTTAGTTTCGATTATATGAACAAATGCCCGAACCA  
AAATATGTTATTGCTATGGGAGCCTGCACAATTACAGGAGGGATGTTTCAGTACAGATTCTTATAGTACT---  
GTTCCGGGGGTAGATAAACTAATTCCTGTGGATGTTTATTTGCCGGGCTGTCCACCGAAACCGGAGTCCATTCTAGATGC  
TATAACAAAACCTTCGTAAGAAAATATCTCGAGAAATCCATGAAGAT---CAAACGAGTTCTCTGAGTTCTCAACGAGAG-  
-----AATAGGTGTTTTACT-----ACCAACCACAAATTTTATGTT-----  
GAACGCAGTACTCATACCGCAATTATGATCAAGTATTATTCCATCAA-----  
-----CCACCGTCT-----ACTTCAGAGATA---TCCTCT-----  
--GACACA-----TTTTTTAGATATCAAAA-AGTTCAGTATCCTCC--CAGAAACGAAATAGTGAATTAG-----  
-----ATGCAA---

ACTAGAAATGCTTTTTCTTATATAAAGGAAGAGATTACTCGATCC-----  
ATTTCCGTATTGCTCGTG-----ATATATATAATA---  
ATTCGAGCACCCATTTCAAATGCATATCCGATTTTTGCCCAACAGGGTTATGAAAATCCGCGAGAAGCAACTGGCCGTAT  
TGTATGTGCCAATTGCCATTTAGCCAATAAGCCCGTGGATATTGAGGTCCCACAAACGGTACTTCCCAGATACTGTATTTG  
AAGCAGTTGTTTCGAATTCCTTATGATATGCAAGTAAAACAAGTTCTTGCTAATGGTAAAAGGGGCGCTTTAAATGTAGGG  
GCTGTTCTTATTTTACCGGAGGGTTTTGAATTTGGCCCCCACC---  
GATCGTATTTTCGCCGAGATTAAGAAAAGATGGGC---AATCTGTCT---TTTCAAAGC---  
TACCGTCCCACGAAAAAAAATATTCTTGTGGTAGGCCCTGTTCTCGGTACAGAAATATAGTGAGATTACCTTTCCGATTCT  
TTCC

Morus                   TTCTTTTCGGAATCCTTATA---  
GCATCCTTTTTATATAATCCTGGTTATTCATCTTTACAAAATTTTAATTTATTTAATTCATTTGTT-----  
AAAGGTATTTCTAAG---  
AAACTGAAATTTTTTGGAGATAAAATAATAAATGTGACATATGATTGGTTCGTATAATCGGGGTTATATTGATTTTTTTTTA  
TGCAACATTTTTAATTC AAGGTATAAGAATATTGTCTGAACTAATTCATTTTTTTGATAGACAAGTAATTGATGGAATTA  
CGAATGGGGTTCGGTATTTTCGAGTTTTTTTCGTAGGAGAAGGTATTAATATGTAGGTGTCGGTTCGAATCTCTTCCATCTT  
TTAGTGTATATATCTTATGTATTAATCTTTTTTATTAATTTACTCCAGAGGAGTTCTTTTTTTTTCTTTAA-----

ATGGATTTGCCTGGACCAATACATGATTTTTCTTTTAGTCTTTCTGGGATTAGGTCTTATCTTAGGAGGTATAGGAGTAGT  
ATTACTTACCAACCAATTTATTCTGCCTTTTCGCTGGGATTAGTTCTT---GTTTGTATATCCTTA---  
TTATATATTCTATCAAATTCATATTTTGTAGCCGCCGACAACCTCCTTATTTACGTGGGAGCTATAAATGTTTTAATCAT  
ATTTGCTGTGATGTTTCATGAATGGTTTCAGAATATTACAAAGATTTTAATCTT-----  
TGGACCGTTGGGAATGGGTTTACTTTGCTGATTTGTACAAGTATTTTTGGTTTACTAATAACTACTATTACGGATACATC  
ATGGTACGGGATTATTTGGACTACAAGATCAAACCAGATTATAGAGCACGATTTGATAAGTAATAGTCAACAAATTTGGAA  
TTCATTTATCAACAGATTTTTTTCTTCCATTTGAATTCATCTCAATAATCTTTTAGCCGCTTTGATAGGTGCAATTACC  
GTGGCGCGTCAATA-----

-----ATGAAT-----  
ATACCAGCTCCAAGAAAAGACCTCATGATAGTAAATATGGGTCCCCACCACCCATCAATGCATGGTGTCTTTCGACTCAT  
CGTTACTCTCGATGGTGAAGATGTTATTGACTGTGAACCAATATTAGGCTATTTACACCGAGGAATGGAAAAAATTCGGG  
AAAACCGAACAATTATACAATATCTGCCTTATGTAACGCGTTGGGATTATTTAGCTACTATGTTTCACAGAAGCAATAACC  
ATAAATGGACCGGAGTTGTTGGGAAATATCCAAGTGCCTAAAAGAGCCAGCTATATCAGAGCAATTATGTTGGAGTTGAG  
CCGTATAGCTTCTCATCTGTTATGGCTTGGTCTTTTTCTGGCAGATATTGGGGCGCAGACTCCTTTCTTCTATATTTTCA  
GAGAAAGAGAATTAGTATATGATCTATTTGAAGCTGCCACCGGTATGAGAATGATGCATAATTTTTTTTCGGATCGGAGGA  
GTAGCGGCTGATTTACCTCACGGCTGGATAGATAAATGTTTAGATTTTTGCGATTATTTTTTAATAGGAGTTACTGAATA  
TCAAAAACCTTATTACCCGAAATCCTATTTTTTTAGAACGAGTTGAGGGAGTAGGCGTTATTGGTAGAGAGGAAGTAATAA  
ATTTGGGGTTTATCAGGACCAATGCTGCGAGCTTCTGGAATACAATGGGATCTTCGTAAAGTTGATCATTATGAATGTTAC  
GACGAATTTGATTGGGAAGTACAGTGGCAAAAAGAAGGAGATTATTAGCTCGTTATCTAGTCCGAATTGGTGAATGAC

AGAATCTATAAAAAATTATTCAACAGGCTCTAGAAGGAATTCAGGGGGTCCATATGAGAATTTAGAAATCCGATACTTTG  
AT-----AGAGAA---  
AGGAATCCAGAATGGAATGATTTTACTATCGATTTATTAGTAAAAAACCTCTCCTACATTTGAATTGCCGAAACAAGA  
ACTCTATGTGAGAGTTGAAGCTCCAAAAGGAGAATTGGGAATTTTTTTGATAGGGGATCAGAGTGGTTTTCTTGGAGAT  
GGAAAATTCGCCCCCGGGTTTTATCAATTTGCAAATTTCTCCTCAGTTAGTTAAAAGAATGAAATTTGGCCGATATTATG  
ACAATACTAGGTAGCATAGATATCATTATGGGAGAAGTTGATCGTTAAATGTTCCCTATGATAACCGGGTTCATGAATTA  
TGGTCAACAAACAGTCCGAGCTGCAAGGTACATAGGTCAAAGTTTCATGATTACCTTGTCCCACGTAAATCGTTTTACCCA  
TAACTATTCAATATCCTTATGAAAAGGTAATCGCTGCGGAGCGTTTTCCGCGGTGCAATCCATTTTGAATTTGATAAATGT  
ATTGCTTGTGAAGTATGTGTTTCGTGTATGTCCTATAGATCTGCCCCTCGTTGATTGGAAAATTTGGAAACTGATATTCGCAA  
GAAACAATTACTTAATTACAGTATTGATTTCCGGAATCTGTATATTTTGTGGTAACTGTGTTGAGTATTGTCCAACAAT  
GTTTATCAATGACTGAAGAATATGAGCTTTCTACTTATGATCGTCACGAATTGAATTATAATCAAATTTGCTCTAGGTCTG  
TTACCAATGTCAGTAATTGACGATTATAACAATTCGAACAATTTCTGAATTTCTCCTCAAATAAAAAATAAGTAA-----  
-----ATGCAG---  
GGTCGTTTGTCTGTTTGGTTAATCAAACATGGGCTAGTTCATAGATCTTTGGGGTTCGATTACCAAGGAATAGAGACGTT  
ACAAATAAAGCCCCGAGGATTGGCATTCCATTGCTGTCAATTTTATATGTATATGGTTACAATTATCTACGTTCCCAATGTG  
CCTATGATGTAGCACCGGGCGGACTGTTAGCCAGTGTATATCATCTTACGAGAATAGAGTATGGTATA---  
GATCAACCGGAAGAAGTATGCATAAAAGTATTTGCCCAAGGAGGAATCCTAGAATTCGGTCTGTTTTCTGGATTTGGAA  
AAGTGCAGGATTTTCAAGAAAGAGAATCTTATGATATGTTGGGAATCTCTTATAATAATCATCCACGTCTGAAACGTATCT  
TAATGCCTGAAAGCTGGATAGGATGGCCTTTACGTAAGGATTATATTGCCCTAATTTTTTATGAAATACAAGATGCTCAT  
TGAATGGGCAATGAGTTTCGATATATTGGGGGTATCCGTATTTATAGAAGCTTTAATTTTTCGTACTTATCCTAATTGTTG  
GTTCAATTTATGCATGGCGAAAAGGAGCATTGGAATGGTCTTAGCTCTTGAATATTCATCCGACAATAAAAA-----  
-----  
GATAACATTGAGACAGTTATGAATTCATTATTGAGTTTCCCTTACTTGATCGAACAACCCAAAATTCAGTCATTTCA--  
-----  
ACTACATCAAGTGATCTTTCAAATTTGGTCAAGACTCTCCAGTTTATGGCCGCTTCTCTATGGTACCAGTTGTTGCTTTAT  
TGAATTTGCTTTCATTAATAGGCTCACGATTCGACTTTGATCGTTATGGACTGGTGCCAAGATCTAGTCTTAGACAGGCAG  
ACCTAATTTCTAACACGCGGGCACAGTAACAATAAAGAAATGGCTCCTTCTTTAGTGAAGATTATGAACAAATGCCGGAACCG  
AAATATGTTATTGCTATGGGAGCATGTACAATAACGGGGGGGATGTTTCAGTACCGATTCTTATAGTACT---  
GTTCCGGGGGGTTCGATAAGCTAATTCCTGTGGATGTTTATTTGCCGGGATGTCCACCTAAACCGGAGGCAGTTATAGATGC  
TATAACAAAATTCGTAAGAAAATATCTCGAGAAATCTATGAAGAT---CGAATTAGATCT-----CAACAGGAG-  
-----AATCGGTGTTTTACT-----ACCAGCCACAAGTTTCGTGTT-----  
GGACGCAGTACTCATACTGGAAATTATAATCAAGGATTACTGTATCAA-----  
-----TCACCATCT-----ACTTCAGAGATC---CCCACT---  
--GAAACT-----TTTTTCGAATACAAA--AGTTTCAGTATCTTCT-----CACGAATTAGTGAATTAG-----  
-----ATGCAA---  
ATGAGAAATACCTTTTCTTGGATAAAGGAAGAGATTATTCGATTC-----  
ATTGCCGTATCGCTCATA-----ATATATATAATA---  
ACTCGGGCACCCATTTCAAATGCGTATCCTATTTTTGCACAGCAGAGTTATGAAAATCCACGAGAAGCGACTGGCCGTAT  
TGTATGTGCCAATTGCCATTTAGCTAACAAGCCCGTGGATATCGAGGTTCCACAAGCGGTACTTCTGATACTGTATTTG  
AAGCAGTTGTTTCGAATTCCTTATGATTTGCAACTGAAACAAGTTCTTGCTAATGGTAAAAAAGGAGCCTTGAATGTGGGA  
GCTGTTCTTATTTTACCTGAGGGGTTTGAATTAGCCCCCTCCC---  
GATCGTATTTCCGCCGAGATTAAGAAAAGATAAGC---AATCTGTCT---TTTCAGAGC---  
TATCGCCCCACGAAAAAAATATTCTTGTGATAGGTCTGTTTCTGGTCAAAAATATAGTGAATCACCTTTCTATTCT  
TTCC  
Nandina           CTATTCCGGAATATTTATA---  
GCGTCTCTTTTATATAGGCTGTTTATTCATCTTTCCAGAATTTGGACTTAATCAATTTCTTTGTT-----  
AAAATGAGTCCTAAG---AGA-----  
ATTTTTTGGGACAAAATAAATGATATATAAATGGTCAATAATCGTGGTTACATCGACGTTTTTTTATACAACAAC  
CTTTACTAGGGGTATAAGAGGGGTAGCGGAACCTATTTATTTTTTTGATAGACAAGTAATTGATGGAATTACGAATGGGG  
TTGGTATTACAAGTTTCTTTGTAGGAGAGGGGATTAATATGTAGGGGGCGGACGAATTTCTTCGTATCTATTCTTGTAT  
TTATTTTATGTATCAATTTTTTTTATTAATTTACTACTTTTTTTAATTTATAA-----  
-----  
ATGGATTTACCTGCACCAATACATGATTTTCTTTTAGTATTTTTGGGGTGGGTCTTATAGTCCGCGGTCTAGGAGTAGT  
ATTACTTACCAATCCAATTTATTCTGCCTTTTCTTTGGGATTGGTTCTT---GTTTGTATATCCTTA---  
TTCCATATTCCAGCGAACTCTCATTTTGTAGCTGCTGCACAGCTCCTTATTTACGTGGGAGCCATAAACGTATTAATTGT  
ATTTGCTGTGATGTTTCATGAATGGTTTCAAGATATTACAATGATTTCCATCTT-----



TGGACCGTTGGGGATGGAGTCACTTCGCTGGTTTGTACAAGTATTTTTGTTTCACTAATTACTACTATCTCAGATACGTC  
ATGGTACGGGATTATTTGGACTACAAGATCAAACCAAATTATAGAGCAAGATTTGATAAATAAGGGTCAACAGCTTGGGA  
TTCATTTATCAACAGACTTTTTTCTCCATTTGAACTTATTTCTATAATTTCTTTAGTTGCCTTGATAGGTGCAATTGCT  
ATGGCTCGCCAGTAA-----

-----ATGACT-----

GTACCAACTACAAGAAAAGATCTAATGATAGTTAATATGGGTCCTCAGCACCCATCAATGCATGGTGTCTTTCGACTCAT  
CGTTACTCTAGATGGTGAAGATGTTATTGACTGTGAACCCATATTGGGTTATTTACACCGAGGAATGGAAAAAATTGCAG  
AAAATCGAACAATTATAACAATATCTGCCCTATGTAACACGTTGGGATTATTTAGCTACTATGTTTACAGAGGCAATAACG  
GTAAATGCACCAGAACAGTTGGGAAATATTCAAGTACCTAAAAGAGCCAGTTATATTAGAGTCAATTATGCTGGAACCTGAG  
TCGTATAGCTTCTCATTTATTATGGCTTGGCCCTTTTATGGCGGATATCGGTGCACAGACTCCTTTCTTCTATATTTTCA  
GAGAGAGAGAATTAATATATGATCTATTTCGAAGCTGCCACAGGTATGCGAATGATGCATAAATTTTTCGTATCGGAGGA  
GTAGCTGCTGATTTACCCCATGGCTGGATAGATAAAATGTTTAGATTTCTGTGATTATTTTGTAAACAGGGGTTACTGAATA  
TCAAAGCTCATTACGCGGAATCCTATTTTTTTTGAACGAGTTGAAGGAGTCGGCTTTATTAGTGGAGAGGAGGCAATAA  
ATTGGGGCTTATCTGGACCCATGCTACGAGCTTCCGGAATTC AATGGGATCTTCGTAAAGTTGATCATTATGAGTGTTAC  
GACGAGTTTGTATTGGGAAGTACAATGGCAAAAAGAAGGAGATTTCGTTAGCTCGTTATTTAGTCCGAATCAATGAAATGAC  
GGAATCTATTAATTTATTCAACAAGCTTTGGAACGAATTCGCGGGGACCCTATGAAAATTTAGAGGTACGACGCTTTG  
AT-----AGGACA---

AGGGATTCCGAATGGAATGATTTTGTATTATCGATTCAATTAGTAAAAAACCTTCGCCACTTTTGAATTGTCGAAACAAGA  
ACTTTATGTGAGAGTAGAAGCCCCAAAGGGGGAGTTGGGAATTTTTCTGATAGGGGATCAGAGTGTTTTTCCCTGGAGAT  
GGAAAATTCGTCCACCTGGTTTTATCAATTTGCAAATTTCTCCTCAGCTAGTTAAAAGAATGAAATTTGGCTGATATTATG  
ACAATACTAGGTAGTATAGATATCATTATGGGAGAAGTTGATCGTTGAATGTTCCCTATGGTAACTGGGTTTCATGAATTA  
TGGTCAACAAACAGTCCGAGCTGCAAGGTATATCGGTCAAAGTTTTATGATTACCTTATCCACGCGAATCGTTTACCTG  
TAACTATTCAATATCCTTATGAAAATTTGATCACATCAGAGCGTTCCGCGGTGCAATACATTTTGAATTTGATAAATGT  
ATTGCTTGTGAAGTATGTGTTTCGTGTATGCCCTATCGATCTACCCGTTGTTGATTGGAAATTTGGAACTGATATTCGAAA  
GAAACGATTGCTTAATTACAGTATTGATTTTGGAACTCTGTATATTTTGTGGTAACTGCGTCGAGTATTGTCCAACAACT  
GTTTATCAATGACTGAAGAATATGAACTTTCTACTTATGATCGTCACGAATTGAATTATAATCAAATTTGCTTTGGGTCGG  
TTACCAATGTCAGTAATTGGAGATTACACAATTCGAACAATTTGAATTCGACTCCAATAAAAAAACCGCGGGTAACCC  
CCTTGATTCAAAAACAATTACCAATTTTTAA-----

-----ATGCAG---

GGTCGTTTGTCTGCTTGGCTAGTCAAGCATGGGCTAGTTCATAGATCTTTGGGCTTCGATTACCAAGGAATAGAACTTT  
ACAAATAAAGCCTGAGGATTGGCACTCCATTGCTGTCAATTCATATGTATATGGTTACAATTATCTACGCTCCAGTGTG  
CCTATGATGTAGCACCAGGGCGGACTGTTAGCTAGTGTGTATCATCTTACGAGAATACAGTATGGTGTG---  
GATCAACCAGAAGAGGTCTGCATAAAAGTATTTGCCCAAGGAGGAATCCTAGAATTCGGTCTGTTTTCTGGATTTGGAA  
AAGCGCGGATTTTCAAGAACGGGAATCTTATGATATGTTGGGAATCTCTTATGATAATCATCCACGCCTGAAACGTATTT  
TGATGCCTGAAAGTTGGATAGGATGGCCTTTACGTAAGGATTATATTGCTCCAAATTTCTATGAAATACAAGATGCTCAT  
TGAATGGGCGATGAGTTTCGATGTATTGGGTGTATCTGTATTTATAGAAGCTTTAATTTTCGTGCTTATCCTAATTGTTG  
GTTTAGTTTTATGCATGGCGAAAGGGGGCATTGGAATGGTCTTAGCTCCTGAATATTCA---

GACAATAAAAAGAAAAACGAAGAAAA---AATTACATTGAGACAGTTATGAATTCATT---

GAGTTTCCGTTACTTGATCGAATAACCCAAAATTCAGTTATTTCA-----

ACTACATCAAATGATCTTTTCAATTGGTCAAGACTCTCCAGTTTATGGCCGCTTCTCTATGGTACCAGCTGTTGCTTCAT  
TGAATTTGCTTCATTAATAGGCTCACGATTGACTTTGATCGTTATGGACTGGTACCAAGATCGAGTCCTAGGCAAGCGG  
ACCTCATTTTAACAGCCGGCACAGTAACAATGAAAATGGCTCCTTCTTTAGTGAGATTATATGAGCAAATGCCTGAACCA  
AAATATGTCATTGCTATGGGAGCTTGTACTATTACAGGAGGGATGTTTCAGTACCGATTCTTATAGTACT---

GTTCCGGGAGTCGATAAGCTAATTCCTGTGATGTTTATTTGCCGGGTTGTCCACCTAAACCGGAGGCAGTTATAGATGC  
TATAACAAAATTCGTAAGAAGGTATCTCGAGAAATTTATGAAGAT---AGAACCGGGTCT-----CAACAGGAG-  
-----ACTCGATGTTTTACT-----ACCAATCACAAGTTTCGTGTT-----

GGACGCAGTATTCATACCGGAAATTATAATCAAGGATTACTCTATCAA-----

-----TCGCCATCT-----ACTTCAGAGACC---CCTTCT----

--GAAACA-----TTTTTCAAATACAAA---AGTTTCAGTATCTCCT-----CACGAATTAGTGAATTAG-----

-----ATGCAA---

AATAGAAATATCTTTTCTTGGGTAAGGAGCAGACGACTCGATCC-----

ATTTCTGTATCGATCATGATATTGATATATGTAATA---

ACTTGGACATCTATTTACATGCATATCCCATTTTTGCACAACAGAGTTATGAAAATCCACGAGAAGCAACTGGGCGTAT  
TGTATGTGCCAATTGCCATTTAGCTAATAAGCCCGTGGATATTGAGGTTCCACAAGCGGTACTTCCGGATACTGTATTTG  
AAGCAGTTGTTAGAATCCCTTATGATATGCAACTGAAACAAGTTCTTTCTAATGGGAAAAGGGGTTCTTTGAATGTGGGG  
GCGGTTCTTATTTTACCTGAGGGATTGCAACTAGCTCCTCCC---

GATCGTATTTCTCCGAAATGAAAGAAAAGATGGGA---AATCTGTCT---TTTCAGAAT---

TATCGGCCGACTAAAAAATATTCTTGTGATAGGTCCTGTTCTGGCCAGAAATATAGCGAAATAACTTTTCTATTCT  
TTCTC

Nicotiana TTATTTTCGGAATATTTATA---

GCATCCTTTTTATATAAACCCATTTATTCTTCTTTAAAAAATTTTGAGTTAATTAATTCTTTTGT-----

AAAAAGGGTCCTAAG---AGA-----

ATTCTGTGGGACAAAATTATAAATGGCATATATGATTGGTCATATAATCGTGCTTACATAGATGCTTTTTATACAAGATT  
CTTAGTTGGTGGGATAAGAGGATTAGCTGAATTTACTCATTTTTTTGATCGACGAGTAATTGATGGGATGACTAACGGGG  
TTGGGGTTATTAGTTTCATTGTAGGAGAAGGTATCAAATATATAGGGGGCGGACGCATCTCTTCTTATCTTTTCTTGTAT  
TTAGCTTATGTTTCAATCTTTTATTAGTTTATTACTTACTCTTTTCAACTTTGTGA-----

ATGGATTTATCTGAACCAATACATGATTTTCTTTTAGTCTTTCTAGGGTTCGGGTCTTATATTAGGGGGTCTAGGAGTGGT  
ATTACTTCCCAATCCAATTTATTCTGCCTTTTCTTGGGATTGGTTCTT---GTTTGTACATCGTTA---

TTCTATATTCTATCTAACTCCTATTTTGTAGCTGCTGCGCAGCTACTTATTTACGTAGGAGCTATAAATGTTTTAATCAT  
TTTTGCTGTGATGTTTATGAATGGTTTCAAAATATTACAAAGATTTTTCATCTT-----

TGGACCGTAGGAGATGGAATTACTTCGATGGTTTGTATAAGTCTTTTTATTTCACTAATTACTACTATTTTTCAGATACGTC  
ATGGTACGGGATTATTTGGACTACAAGATCAAACCAGATTATAGAGCAAGATTTTATAAGTAATAGTCAACAAATTGGAA  
TTCATTTATCAACAGATTTTTTTTCTTCCATTTGAAGTATTTCAATAATCCTTTTGTAGTTGCTTTAATAGGTGCAATTGCT  
GTAGCTCGTCAATA-----

-----ATGACT-----

GCACCAACTACAAGAAAAGACCTCATGATAGTCAATATGGGGCCTCAGCACCCATCAATGCACGGTGTCTTTCGACTCAT  
CGTTACTCTAGATGGTGAAGATGTTGTGACTGCGAACCAATATTGGGTTATTTACATAGAGGGATGGAGAAAATTGCGG  
AAAACCGAACAATTATACAATATTTGCCTTATGTAACACGTTGGGATTATTTAGCTACTATGTTTACAGAAGCAATAACC  
ATAAATGGACCCGAACAATTAGGCAATATTCAAGTACCTAAAAGGGCTAGCTATATCAGAGTCATTATGTTGGAGTTGAG  
TCGGATAGCTTCTCATTTGTTATGGCTAGGCCCTTTTATGGCGGATATTGGTGCAGACCCCTTTCTTCTATATTTTC  
GAGAAAGAGAATTGATATATGACCTCTTCAAGCTGCCACCGGTATGCGAATGATGCATAAATTATTTTCGTATCGGGGA  
GTGGCTGCCGATCTACCCTATGGCTGGATAGATAAATGTTTGGATTTTTCGATTATTTTTAACAGGGGTTGCTGAGTA  
TCAAAAACCTTATTACCCGGAATCCTATTTTTTAGAACGAGTTGAAGGCGTAGGCATTATTGGGGGAGACGAAGCATTAA  
ATTGGGGGTTATCGGGACCAATGCTACGAGCTTCCGGAATAGAATGGGATCTTCGTAAAGTTGATCATTATGAGTCTTAC  
GACGAATTTGATTGGCAGGTTCAATGGCAACGAGAAGGGGATTCATTAGCTCGTTATTTAGTACGAATCGGTGAAATGAC  
AGAATCCATAAAGATTATTCAACAGGCTCTGGAAGGAATTCAGGAGGGCCTTACGAAAATTTAGAAATCCGACGTTTTG  
AC-----AGATTA---

AAAGATCCTGAATGGAATGATTTTGAATATCGGTTTATTAGTAAAAAACCTTCTCCAACTTTTGAATTGTCGAAACAAGA  
ACTTTATGTGAGAGTTGAAGCCCCAAAAGGAGAATTGGGAATTTTTCTCATAGGAGATCAGAGCGTTTTTCTTGGAGAT  
GGAAAATTGCGCCACCAGGTTTTATCAATTTGCAAATTTCTCCTCAGTTAGTTAAAAGAATGAAATTGGCTGATATTATG  
ACAATACTAGGTAGCATAGATATCATTATGGGAGAAGTTGATCGTTGAATGCTCCCTATGATAACTGAATTCATAAATTA  
TGGTCAACAAACAATACGAGCCGCCAGATACATCGGCCAAGTTTTCATGATTACCCTGTCCACGCAAATCGTTTACCTG  
TAATACTTCAATACCCCTACGAAAAATTGATCACATCGGAACGTTTCCGAGGCCGAATCCACTTTGAATTTGATAAATGC  
ATTGCTTGTGAAGTATGTGTGCGTGTATGTCCTATAGATTTACCCGTTGTTGATTGGAAGTTGGAACTGATATTCGAAA  
GAAACGATTGCTTAATTACAGTATTGATTTTGGAACTGTATATTTTGTGGTAATTGCGTTGAGTATTGTCCAACAAATT  
GTTTATCAATGACCGAAGAATATGAACTTTCTACTTATGATCGTCACGAATTGAATTATAATCAAATCGCTTTGGGTCGC  
TTACCAATGTCAGTAATTGATGATTACACAATTCGAACAATTTCGAATTTACCTCAAATAAAAAATGAATA-----

-----ATGCAG---

GGTCGTTTGTCTGCTTGGCTAGTCAAGCATGGGCTAATTCATAGATCTTTGGGCTTTGATTACCAAGGAATAGAGACTTT  
ACAAATAAAGCCCCGAGGATTGGCATTCCATTGCTGTCTATTTTTATGTATATGGGTACAACCTATCTCCGCTCTCAATGTG  
CCTATGATGTAGCGCCTGGCGGGCTGTTAGCTAGTGTGTATCATCTTACGAGAATAGAGGATGGTGTG---

GATCAACCAGAGGAGGTATGCATAAAAAGTATTTGCCTCCAGGAGGAATCCTAGAATTCGTCTGTTTTCTGGGTTTGGAA  
AAGTGTGGATTTTCAAGAACGAGAATCATATGATATGTTGGGAATCTCTTATGATAATCATCCAGCTTGAACGATCT  
TAATGCCTGAAAGTTGGATAGGATGGCCCTTACGTAAGGATTATATTGCCCCCAATTTTTATGAAATACAAGATGCTCAT  
TGAATGGGCAATGAGTTTTCGACGATTGGGTGTATCTGTATTTATAGAAGCTTTTCAATTTTCGTGCTTATCTTAATTATTG  
GTTTAGTTTTATGCATGGCGAAAGGGGCATTGGAATGGTCTTAGCTCCTGAATATTCA---GACAATAAAAAAGAAA---

AACGGAAAA---AATAAGATTGAGACAGTTATGAATTCCATT---  
CAGTTTCTTTACTTGTATCGAACAACCCAAAATTCAGTTATTTCA-----

ACTACATTAATGATCTTTCAAATTTGGTCAAGACTCTCTAGTTTATGGCCGCTTCTCTATGGTACCAGTTGTTGCTTCAT  
TGAATTTGCTTCACTAATAGGCTCACGCTTCGACTTTGATCGTTATGGACTAGTACCAAGATCGAGTCTTAGACAAGCGG  
ATCTAATTTTAAACAGCCGGAACAGTAACAATGAAAATGGCCCCCTTTTGTAGTGAATATATGAGCAAATGCCTGAACCA  
AAATATGTTATTGCTATGGGAGCCTGTACAATTACAGGCGGGATGTTTCAGTACCGATTCTTATAGTACT---

GTTCTGGGGAGTCGATAAGCTAATTCCTGTAGATGTATATTTGCCAGGTTGCCACCTAAACCGGAAGCGGTTATAGATGC  
TATAACAAAACCTTCGTAAGAAAATATCTCGAGAACTCTATGAAGAT---CGAATTAGGTCT-----CAACGAGCG-  
-----AATCGGTGTTTTACT-----ACCAATCACAAAGTTTTCATGTT-----  
CAACACAGTATTCATACGGGAAATTATGATCAAAGAGTTCCTTTATCAA-----  
-----CCCCATCT-----ACTTCAGAGATC---CCTACG----  
--GAAATC-----TTTTTCAAATACAAA--AATTCAGTATCTTCC-----CCCGAATTAGTGAATTAG-----  
-----ATGCAA---  
ACTAGAAATGCTTTTTCTTGGCTAAAGAAACAGATTACTCGATCT-----  
ATTTCCGTATCGCTCATG-----ATATATATCTTA---  
ACTCGGACATCCATTTCAAGTGCATATCCCATTTTTGCACAGCAGGGTTATGAAAATCCACGAGAAGCGACTGGGCGTAT  
TGTATGTGCCAATTGCCATTTAGCTAATAAAGCCCGTGGAGATTGAGGTTCCACAAGCGGTACTTCCTGATACTGTATTTG  
AAGCAGTTGTTTCAATTCTTTATGATATGCAACTGAAACAGGTTCTTGCTAATGGTAAAAGGGGGGGTTGAACGTGGGG  
GCTGTTCTTATTTTACCGGAGGGGTTTGAATTAGCTCCTCCC---  
GATCGTATTTCTCCCAGATGAAAGAAAAGATTGGC---AATTTGTCT---TTTCAGAGC---  
TATCGCCCCAATAAAAAAATATTCTTGTGATAGGCCCTGTCCCTGGTCAAAAATATAGTGAAATAACCTTCCCTATTCT  
TTCCC  
Nuphar           CTATTTTGGGAATATTTATA---  
GCATCCGTTCTATATGGGTCTGTCTATTTCAGACCGACAAAATTTGTACTTAATCAATTCATTTGCT-----  
AAAATGGGTCTTAAAATGAGA-----  
ATTCGCTTAGAACAAATAATAAATGTATATACAACCTGGTCATACAATCGCGGCTACATAGACGTTTATTACGAAAAAGT  
ATTCATTAGGGGTATACGAGGATTAGCTCAACTAGCTCATTCTTTTGTATCGACGAGTAATTGATGGAGTTACGAATGGGG  
TTGGTGTGCAAGTTTCTTTCTGGGAGAAGGGATTAAATATATAGGGGGGGGGCGAATTTCTTCTTATCTATTCTTATAT  
TTAGCTTGTGTATCAATAGTCTTACTATTGGTAAAATAA-----  
-----  
ATGGATTTACCTGCACCAATACATGATATTCTTTTAGTATCTCTGGGATCAGGTCTTATAGTAGGAGGTCTAGGAGTGGT  
ATTACTTACCAATCCAATTTATTCTGCCTTTTCGTCCGGGATTGGTTCTT---GTTTGTATATCTTTA---  
TTTTATATTCCATCGAACTCTTATTTTGTAGCTGCTGCGCAGCTCCTTATTTACGTGGGAGCCATAAATGTCTTAATCCT  
ATTTGTCTGTGATGTTTATGAATGGTTTCAAGATATTACAATTTCTTTTCATTTT-----  
TGGACTATCGGAGATTGGGTTCACTTCGGTAGTTTGTACAAGTATTTTTTTTTTCACTAATTGCTACTATCCCAAACACGTC  
ATGGTACGGGATTATTTGGACTACAAGATCAAACCAGATCATAGAACAGGACCTGACAAGTAATGTTCAACAGATTGGGA  
TTCATTTATCAACAGATTTTTATCTTCCATTTGAACTTATTTCTATAATCCTTTTAGTTTCCTTAGTGGGCGCAATTGCT  
ATGGCTCGCCGGGAATAG-----  
-----ATGACT-----  
GTACCAGACGCAAGAAAAGACCTCCTCGTTGTCAATATGGGTCTCACCACCCGTCATGCATGGTGTCTTTCGACTCAT  
TGTTACTCTAGATGGCGAAGATGTTATTGACTGTGAACCCATATTGGGTTATTTACACAGAGGAATGGAAAAAATTGCAG  
AAAACCGAACAAATTATACAATATCTACCTTATGTGACACGTTGGGATTATTTAGCTACTATGTTTACGGAGGCAATAACG  
GTTAATGCACCAGAGGAATTGGGAAATATTCAAGTACCTAAAAGAGCCAGCTATATCAGGGTAATTATGCTGGAGTTGAG  
TCGTATAGCTTCGCATTTGTTATGGCTTGGACCTTTTATGGCCGATATCGGTGCGCAGACTCCTTTCTTCTATATTTTCA  
GAGAGAGAGAATTGTTATATGATCTATTTCGAAGCTGCCACAGGTATGCGAATGATGCATAAATTATTTCCGTATCGGGGG  
GTAGCTGCTGATCTACCTCATGGCTGGATAGATAAATGTTTAGATTTCTGCGATTATTTTTTAAACGGGAGTTGTTGAATA  
TCAAAGCTTATTACGCGCAATCCTATCTTTTTAGAACGAGTTGAAGGGGTAGGCTTTATTGGGGGAGAGGAAGCAATAA  
ATTGGGGTTTATCAGGACCAATGCTACGAGCTTCTGGAATCCAATGGGATCTTCGTAAAGTCGATCGGTATGAGTGTAT  
GATGAATTCGATTGGGAAGTCCAATGGCAAAAAGAAGGAGACTCATTAGCTCGTTATTTAGTAAGAATTGGCGAAATGAC  
GGAATCCATAAAAATTTCAACAGGCTCTAGAAGGAATCCCGGGGGGGCCTTATGAAAATTTAGAATTCGGACGCTTTG  
CT-----GGAACA---  
AAAGATTGAGAATTGAACGATTTTGAATATCGATTCAATTAGTAAAAAGCCTTCTCCAGTTTTGAATTGTCAAACAAGA  
ACTTTATGTGAGAGTAGAAGCCCCAAAGGGAGAATTGGGTATTTTTCTGATAGGAGACAATAGTGTTTTTCTTGGAGAT  
GGAAAATCCGTCCACCCGGTTTCATCAATTTGCAAATTTCTCCTCAGCTAGTTAAAAGAATGAAATTGGCGGATATTATG  
ACAATACTAGGTAGTATAGATATCATTATGGGAGAAGTTGATCGTTGAATGTTTCTATGGTACTGGGTTTATGAATTA  
TGGTCAACAGACAGTACGAGCTGCAAGATACATTGGTCAAAGTTTTCATGATTACCTTATCTCACGCGAATCGTTTACCTG  
TAACTATTCAATATCCTTATGAAAAATCGATCACATCAGAGCGTTTCCGTGGGCGAATCCACTTTGAATTTGATAAATGC  
ATTGCTTGCGAAGTATGTGTTTCGCGTATGTCCGATAGATCTACCTGTTGTTGATTGGCGATTAGAAACAGATATTAGAAA  
GAAACGATTGCTTAATTATAGTATTGATTTCCGAATCTGTATATTTTGTGGTAATTGCGTGGAGTATTGCCCCACAACT  
GTTTATCAATGACGGAAGAATATGAACTTTCCACCTACGATCGTCACGAATTAATATAATCAAATTGCTTTGGGTCCG  
TTACCAATGTCTGTAATTGGGGATTACACAGTTCGAACAATTATGAATTCAACTCAAATAAAAAATATCTATGGATAAATC  
CCTTGATTCAAGAACGATTACCAATTA-----  
-----ATGCAG---

GGTCGTTTCATCCGCTTGGCTAGTTAAACACGAGCTAGTTCATAGATCTTTGGGCTTTGATTACCAAGGAATAGAGACTTT  
ACAAATAAAGCCCCGAGGATTGGTACTCCATTGCTGTCAATTTTCATACGTATATGGTTACAATTATCTACGTTCCCGAGTGTG  
CCTATGATGTAGCACCAGGTTGGGTTGTTAGCTAGTGTGTATCATCTGACGAGAATACAGTATGGTGTG---  
GACCAACCGGAAGAGGTATGCATAAAAGTATTTGTCCCAAGGAGTAATCCTAGAATCCCCTGTTTTCTGGATTTGGAA  
AAGCGCCGATTTTCAAGAACGGGAATCTTATGATATGTTGGGAATCTCTTATGATAATCATCCACGCATGAAACGGATTT  
TGATGCCCCGAAAGTTGGGTTGGTTGGCCCCCTACGCAAGGATTATATTGCCCTAATTTCTATGAACTACAGGATGCTCAT  
TGAATGGGCCGTGAGTTTCGATGTATTGGGCGTATCCGTATTTATAGAAGCTTTGATTTTCGTGCTTATCCCAGTTGTTG  
GTTTCAGTTTATGCATGGCGAAAAGGAGCATTGGAATGGTCTTAGCTCCTGAATATTCA---GACAATAAAAAA-----  
GAAGGAAAG---GGTTCATTGAGACAGTTATGAATTCATG---  
GAGTTTCCGTTCCCTTGACCGAACAACCCCAATTCAGTTATTTCA-----  
ACTACATTTGAATGATCTTTTCGAATTTGGTCAAGACTTTCCAGTTTATGGCCGCTTCTCTATGGTACCAGTTGTTGCTTCAT  
TGAATTTGCTTTCATTAATAGGCTCTCGATTTCGACTTTGATCGTTATGGACTGGTGCCAAGATCAAGTCTTAGGCAAGCCG  
ACCTTATTTTAAACAGCCGGTACAGTAACAATGAAAATGGCTCCTTCTTTAGTAAGACTATATGAACAAATGCCTGAACCA  
AAATATGTAATTGCTATGGGAGCCTGCACTATTACAGGAGGAATGTTTCAGTACCGATTCTTATAGTACT---  
GTTCCGGGGAGTCGATAAGTTAATTTCCGTCGATGTCTATTTGCCAGGCTGCCACCTAAACCAGAGGCAATTATAGACGC  
TATAACGAAACTTCGTAAGAAAGTATCTCGAGAAATCTATGAAGAT---AGAACGGAGTCC-----CAACAGGAA-  
-----AATCGATGTTTTACT-----ACTAATCACAAGTTTCATCTT-----  
GGACGCAGTACTCGTGTCTGTAATTATGATCAAGGATTACTCTATCAA-----  
-----TCGACATCG-----ACTTCAGAGATA---CCTTCT----  
--GAAGCA-----TTTTTCAAATACAAG---AGTTCAGTATCTTCT-----CACGAATTAGTGAATTAG-----  
-----  
ATGCAAAAAAATAGAAATACTTTTTCTTGGGTAAAGGAACAGATGACTCGATGC-----  
ATTTCCGATCGATGATG-----ATATATGTAATA---  
ACTCGGGCATCTATTTCAAATGCATATCCCATTTTTGCGCAGCAGGGTTATGAAAATCCGCGAGAAGCAACTGGGCGTAT  
TGTATGCGCCAATTGCCACCTGGCTAGCAAGCCCGTGGATATTGAGGTTCCACAAGCTGTGCTTCCCTGATACTGTATTTG  
AGGCAGTTGTTAGAATCCCCTACGATATGCAACTGAAACAGGTTCTTGCTAATGGTAAAAAGGGAGGTTTGAATGTAGGG  
GCTGTTCTCATTTTACCCGAAGGATTTGAATTAGCTCCCCCT---  
GATCGTATTTCTCCCGAGATGAAAGAAAGGATGGGT---AATCTGTCT---TTTCAGAGT---  
TATCGTCTTAATAAAAAAATATTCTTGTGGTAGGCCCTGTTCTTGGTGCAGAAATATAGTGAATCGTCTTTCCCATCCT  
TTCTC  
Nymphaea           CTACTTCGGAATATTTCTA---  
GCATCTGTTCTATATGGGTCTGTCTATTCAGATCGACAAAATTTGTACTTAATCAATTCATTTGCT-----  
AAAATAGATTCTAAAATGAGA-----  
ATTCGCTTAGAACAATAATAAATGTATATACAACCTGGTCATACAATCGCGGATACATAGACGTTTATTACGAAAAAGT  
ATTCATTAAGGGTGTACGAGAATTAGCTCAACTAGCTCATTCTTTTATCGACGAGTAATTGATGGAGTTACTAATGGGA  
TTGGCGTTGCAAGTTTCTTTCTAGGAGAAGGTATTAATATATAGGGGGAGGGCGAATTTCTTCTTATCTATTCTTATAT  
TTAGCTTGTGTATCAATAGTCTACTAATTTACTATTACTATAATTTTCTAAATTA-----  
-----  
ATGGATTTACCTGCGCCAATACATGATATTCTTTTAGTATCTCTGGGATCAGGTCTTATAGTAGGAGGTCTAGGAGTGGT  
ATTACTTACCAATCCAATTTATTCTGCCTTTTCGTTGGGATTGGTTCTT---GTTTGTATATCTTTA---  
TTTTTATATTCCATCGAACTCTTATTTTGTAGCTGCTGCGCAGCTACTTATTTACGTGGGAGCCATAAATGTCTTAATCTT  
ATTTGCTGTGATGTTTATGAATGGTTTCAAGATATTACAATTATTTTCATTT-----  
TGGACTGTGCGGAGATGGATTCACTTCGCTAGTTTGTACAAGTATTTTTTTTTTCACTAATTGCTACTATCCCAAACACGTC  
ATGGTACGGGATTATTTGGACTACAAGATCAAACCAGATCATAGAACAGGACCTGACAAGTAATGTTCAACAGATTGGGA  
TTCATTTATCAACAGATTTTATCTTCCATTTGAACTCATTCTATAATCCTTTTAGTTCCTTAGTGGGCGCAATTGCT  
ATGGCTCGCCGGGAATAG-----  
-----ATGACT-----  
GTACCAGACGCAAGAAAAGACCTCCTCGTGGTCAATATGGGTCTCACCACCCGTCATGTCATGGTGTCTTTCGACTCAT  
TGTTACTCTAGATGGCGAAGATGTTATCGACTGTGAACCCATATTGGGTTATTTACACAGAGGAATGGAAAAAATTGCGG  
AAAACCGAACAATTATACAATATCTACCTTATGTGACACGTTGGGATTATTTAGCTACTATGTTTACGGAGGCAATAACC  
GTTAATGCACCTGAGGAATTGGGAAATATTCAAGTACCTAAAAGAGCCAGCTATATTAGGGTAATTATGCTGGAGTTGAG  
TCGTATAGCTTCGCATTTGTTATGGCTTGGACCTTTTATGGCCGATATCGGTGCACAGACTCCTTTCTTCTATATTTTCA  
GAGAGAGGGAATTGTTATATGATCTATTTCGAAGCTGCCACAGGTATGCGAATGATGCATAAATTATTTCCGTATCGGGGG  
GTAGCTGCTGATTTACCTCATGGCTGGATAGATAAATGTTTAGATTTTTCGATTATTTTTTAAACGGGAGTTGTTGAATA  
TCAAAAGCTTATTACGCGCAATCCCATCTTTTTGGAACGAGTTGAAGGGTGGGTTTTATTGGGGGAGAAGAAGCCATAA  
ATTGGGGTTTATCAGGACCAATGCTACGAGCTTCCGGAATCCAATGGGACCTTCGTAAAGTCGATCGGTATGAGTGTAT  
GATGAATTCGATTGGGAAGTCCAATGGCAAAAAGAAGGAGACTCATTAGCTCGTTATTTAGTAAGAATTGGCGAATGAC

GGAATCCATAAAAAATTATTCAACAGGCTCTAGAAGGAATTCCGGGGGGACCTTATGAAAATTTAGAATTCGGACGCTTTG  
CT-----GGAACA---  
AAAGACTCAGAATTGAACGACTTTGAATATCGATTATTAGTAAAAAGCCTTCTCCCAGTTTTGAATTGTCAAAACAAGA  
ACTTTATGTAAGAGTGGAAAGCCCCAAAGGGGAGAATTAGGTATTTTTCTGATAGGAGATAATAGTGTTTTTCTTGGAGAT  
GGAAAATCCGTCCACCCGGTTTCATCAATTTGCAAATTTCTCCTCAGCTAGTTAAAAGAATGAAATTTGGCTGATATTATG  
ACAATACTAGGTAGTATAGATATCATTATGGGAGAAGTTGATCGTTGAATGTTTCTATGGTGACTGGGTTTCATGAATTA  
TGGTCAACAGACAGTACGAGCTGCAAGATACATTGGTCAAAGTTTCATGATTACCTTATCTCACGCAAATCGTTTTACCTG  
TAACTATTCAATATCCTTATGAAAAATCGATCACATCAGAGCGTTCCGTGGGCGAATCCACTTTGAATTTGATAAATGC  
ATTGCTTGTGAAGTATGTGTTTCGCGTATGTCCGATAGATCTACCTGTTGTTGATTGGCGATTAGAAAACAGATATTAGAAA  
GAAACGATTGCTTAATTATAGTATTGATTTTGGAACTCTGTATATTTTGTGGTAATTGCGTGGAGTATTGCCCCACAACT  
GTTTATCAATGACTGAAGAATATGAACCTTTCCACCTACGATCGTCACGAATTAATTATAATCAAATTTGCTTTGGGTCGG  
TTACCAATGTCTGTAATTTGGAGATTACACAGTTTCAACAATTTATGAACTCAACTCAAATCAAATATCTATGGATAAACC  
CCTTGATTCAAGAACGATTACCAATTA-----ATGCAG---  
-----ATGCAG---  
GGTCGTTTCATCCGCTTGGCTAGTTAAACACGAGCTGGTTCATAGATCCTTGGGCTTTGATTACCAAGGAGTAGAGACTTT  
ACAAATAAAGCCCCGAGGATTGGTACTCCATTGCTGTCATTTTCATACGTATATGGTTACAATTATCTACGTTCCCAATGTG  
CCTACGATGTAGCACCGGGTGGATTGCTAGCTAGTGTGTATCATCTGACGAGAATACAGTATGGTGTG---  
GACCAACCAGAAGAGGTATGCATAAAAGTATTTGTCCCAAGGAGTAATCCTAGAATCCCGTCTGTTTTCTGGATTTGGAA  
AAGCGCCGATTTTCAAGAACGGGAGTCTTATGATATGTTGGGAATCTCTTATGATAATCATCCACGCATGAAACGGATTT  
TGATGCCCGAAAGTTGGATTGGTTGGCCCTACGCAAGGATTATATTGCCCTAATTTCTATGAACTACAGGATGCTTAT  
TGA-----ATGGCGAAAAGGAGCATTGGAATGGTCTTAGCTCCTGAATATTCA---GACAATAAAAAA-----  
GAAGGAAAG---GGTTCCATTGAGACAGTTATGAATTCTATG---  
GAGTTTCCGCTCTTTGACCGAACAACCCCAATTTCAGTTATTTCA-----  
ACTACATTGAATGATCTTTTCGAATTGGTCAAGACTTTCCAGTTTATGGCCGCTTCTCTACGGTACCAGTTGTTGCTTCAT  
TGAATTTGCCTCATTAAATAGGCTCCCGATTTCGATTTTTCATGCTTATGGACTGGTGCCAAGATCCAGTCCTAGGCAAGCCG  
ACCTTATTTTAAACAGCCGGTACAGTAACAATGAAAATGGCTCCTTCTTTAGTAAGACTATATGAACAAATGCCTGAACCA  
AAATATGTAATTGCTATGGGAGCCTGTACTATTACAGGAGGAATGTTTCAGTACCGATTCTTATAGTACC---  
GTTCCGGGAGTCGATAAGTTAATCCCGTCGATGTCTATTTGCCAGGATGCCACCTAAACCAGAGGCAATTATAGACGC  
TATAACGAAACTTCGTAAGAAGGTATCTCGAGAAATCTATGAAGAT---AGAACGGGGTCC-----CAACAGGAA-  
-----AATCGATGTTTTACT-----ACTAATCACAAGTTTCATCTT-----  
GGACGCAGTACTCGTGCCGTAATTACGATCAAGGATTACTCTATCAA-----  
-----TCGACATCG-----ACTTCAGAGATA---CCTTCT---  
--GAAGCA-----TTTTTCAAATACAAG---AGTTTCAGTATCTTCT-----CACGAATTAGTGAATTA-----  
-----  
ATGCAAAAAAATAGAAATACTTTTTCTTGGGTAAAGGAACAGATGACTCGATGC-----  
ATTTCCGTATCGATGATG-----ATATATGTAATA---  
ACTCGGCATCTATTTCAAATGCATATCCATTTTTGCGCAGCAGAGTTATGAAAATCCGCGAGAAGCAACTGGGCGTAT  
TGTATGCGCTAATTGCCACCTGGCTAACAAGCCCGTGGATATTGAGGTTCCACAAGCTGTGCTTCTGATACTGTATTTG  
AGGCAGTTGTTAGAATCCCCTACGATATGCAACTGAAACAGGTTCTTGCTAATGGTAAAAGGGAGGTTTGAATGTGGGG  
GCTGTTCTCATTTTTACCCGAAGGATTTGAATTAGCTCCCCC---  
GATCGTATTTCTCCCAGATGAAAGAAAAGATGGGT---AATCTGTCT---TTTCAGAGT---  
TATCGTCTAATAAAAAAACATTCTTGTGGTGGGCCCTGTTCTGGTTCAGAAATATAGTGAATCGTCTTTCCCATCCT  
TTCTC  
Oenothera CCTTTTGGGGATATTTATA---  
GCGACTTTCTTATATAAGCCTATTTATTCATCTTTACAAAATTTCCACTTACTTAATTCATTTTAT-----  
AAAAGAAGTGCCAAT---CGA-----  
GTTATGTGGGACAAAATCCAAAATTTGGATATATGATTGGTTCATATAATCGTGGTTATATAGATTCTTTTTTATACAATATC  
CTTAACTGGGGGTATAAGAGGATTGGCTGAACTAAGTCATTTTTTTGATAGACGCGTAATTGATGGAATTTCTAAACGGAT  
TCGGCCTTACGAGTTTCTTTTTAGGAGAAAGTCTCAAATATTTCCGGGGCGGACGTATCTCT-  
CGTCTCTCTTATTGTATTCCATTTTTTATATTCATTTTTTTTATTAA-----  
-----  
ATGGATTTGCCTGGACCAATACATGATTTTTCTTTTAGTTTTCTGGGATCGGGTCTTATAGTAGGAGGTCTGGGGTGGT  
CTTACTTACCAATCCCATTTTTCTGCCTTTTTCGTTGGGATTGGTTCTT---GTTTGCATATCCTTA---  
TTTTTTAGTTTTATCAAATCCTATTTTTGTAGCGGCTGCGCAGCTACTTATTTACGTGGGAGCTATAAATGTTTTAATCCT  
ATTTGCTGTGATGTTTCATGAATGGTTTCAAGATATTTCAAAGATTTGACTCTT-----  
TGGACTGTTGGTGTGGGATTACGTCGTTGGTTGTACAAGTATTTTTATTTCACTAATTACTACTATTCTAGATACGTC

TTGGTACGGGATTATTTGGACGACAAAATCAAATCAGATTATAGAGCAAGATTTGATAGGTAATAGTCAACAAATTGGAA  
TTCATTTATCAACTGATTTTTTTCTTCCATTTGAGCTGATTTCAATAATACTTTTAGTTTTCTTTGATAGGTGCAATTGCC  
GTTGCTCGTCAATGA-----

-----ATGAAT-----

GTAACAACGACAAGAAAAGACCTCATGATAGTCAATATGGGACCTCACCACCCATCAATGCATGGTGTCTTCCGGCTCAT  
CCTTACTCTAGACGGTGAAGATGTTATTGATTGTGAGCCAATATTGGGTTATTTACACCGAGGGATGGAAAAAATTGCGG  
AAAACCGAACTGTAATACAATATCTGCCTTATGTAACACGGTGGGATTATTTAGCGACTATGTTTACAGAAGCAATAACC  
ATAAATGGACCCGAACAGTTGGGGAATATTCAAGTACCTAAAAGAGCAAGTTATATCAGAATAATTATGTTAGAGTTGAG  
TCGTATAGCTTCTCATCTCTTATGGCTTGGCCCTTTTATGGCGGATATTGGTGCACAGACTCCCTTTTTCTACATTTTCA  
GAGAAGAGAGAATTAGTATATGATCTATTTGAAGCTGCCACCGGTATGAGAATGATGCATAATTATTTTCGTATCGGAGGA  
GTGGCGGCCGATACCCTGATGGATGGATAGATAAATGTTTGGATTTCTGTGATTATTTTTAACAGCAGTTTTCGGAATA  
TCAAAAACCTTATTACGCGGAATCCTATTTTTTGAACAGATTGAGGGGGTGGCATTATTGGCGGGGAAGAAGCAATAA  
ATTGGGGTTTATCAGGACCAATGCTCCGAGCTTCCGGAATAGAATGGGATCTTCGTAAAGTTGATCGTTATGAATGTTAC  
GGCGAGTTGGATTGGGAAATCCGGTGGCAAAAAGAAGGGGATTATTAGCTCGTTATTTAGTCCGAATGAGTGAAATGAC  
GGAATCTATCAAATTTATTCAGCAGGCTCTGGAAGGAATTCCGGGGGGCCCTTATGAAAATTTGGAAATACGATGCTTTG  
AT-----AGAGAA---

AAGGATCCAGAATGGGACGGTTTTGAATATCGATTATTAGTAAAAAACCTTCTCCCACTTTTGAATTGCCGAAGCAAGA  
ACTTTATGTACGCGTTGAAGCTCCAAAAGGAGAATTGGGAATTTTTTAAATAGGAGATCAAAGTGGTTTTCTTGGAGAT  
GGAAAATCCGCCCGCTGGTTTTATCAATTTGCAAATTTCTTCTCAGTTAGTTAAAAGAATGAAATTGGCTGATATTATG  
ACGATACTAGGTAGCATAGATATCATTATGGGAGAAGTAGATCGTTGAATGTTCCCTATGGTAACTGGGTTTATGAATTA  
TGGTCAACAAACAGTACGAGCTGCAAGGTACATTGGTCAGGGGTTTATGATTACCTTATCCACGCAAATCGTTTACCCG  
TAATATTCAATATCCTTATGAAAATTAATTACATCGGAACGTTTCCGCGGTGCAATCCATTTTGAATTTGATAAATGC  
ATTGCTTGTGAAGTATGTGTTTCGTGTATGTCCTATAGACCTGCCCGTTGTTGATTGGAAATGGAAACCGGTGTTGAAA  
GAAACGATTGCTTAATTACAGTATTGATTTCCGAGTTTGTATATTTTGTGGTAACTGCGTTGAGTATTGTCCAACAACT  
GTTTATCAATGACGGAAGAATATGAACTTTCTATTTATGATCGTCACGAATTGAATTATAATCAAATCGCTTTGGGTCTG  
TTACCAATGTCAGTAATCGACGATTATACAATTCGGACAATTTTGAATTCAGCGCAAATAAAATAA-----

-----ATGCAG---

GGTCGTTTGTCTGCTTGGCTAGTCAAGCACGGGCTAGTTCATAGATCTTTGGGCTTCGATTACCAAGGAATAGAACTTT  
ACAAATAAAGCCCCGAGGAGTGGCATTCCATTGCTGTCAATTTTATATGTATATGGTTACAATTATCTACGTTCCCAATGTG  
CTTATGATGTAGCACCCGGTGGACTGTTAGCTAGTGTGTATCATCTTACGAGAATAGAGTATGGTGTG---  
GATCAAGCGGAGGAGGTATGCATTAAGTATTTGCTCCAAGGAATAATCCTAGAATTCGGTCCGTTTTCTGGGTTTGGAA  
AAGCGCGGATTTTCAAGAACGAGAGTCTTATGATATGTTGGGAATCCGTTATGATAATCATCCACGACTGAAACGTATCT  
TAATGCCGAAAGTTGGATAGGATGGCCCTTACGTAAGGATTATATTGCCCCCAATTTTTATGAAATACAAGATGCTCAT  
TGA-----

-----ATGGTCTTAGTTCATGAATATTCA---GACAATAAAAAAGTA---

AAAAATAAA---AAGAACATTGAAACAGTTATGAATTCCATA---  
GAATTTACCTTACTTGTCTGAAGAACGCAAATTCAGTTATTTCA-----  
ACTACATCAAATGATCTTTCAAATTTGGTCAAGGCTCTCGAGTTTATGGCCGCTTCTTTATGGTACCAGCTGTTGCTTCAT  
TGAATTTGCTTCATTAATAGGCTCACGATTGACTTTGATCGTTATGGACTGGTACCAAGATCGAGTCCCTAGACAGGCGG  
ACCTCATTTTAAACAGCTGGCACAGTAACAATGAAAATGGCTCCTTCTTTAGTGAGATTATATGAACAAATGCCCGAACCA  
AAATATGTTATTGCTATGGGAGCGTGTACAATTACCGGGGTATGTTTCAGTACCGATTCTTATAGTACTG--  
GTTTCGTGGAGTAGACAAGCTAATTCCTGTAGATGTCTATTTGCCA-

GCTGCCCGCCTAAACCGGAGGCTATTATAGATGCTATAACAAAACCTTCGTAAGAAAATATCTAGAGAAATCTATGAAGAT  
---CGATTTAGGTCT-----CAAGAGGAG-----AATCGATGTTTTACT-----

ACCAATCACAAGTTTCATGTT-----

GGACCGAGTATGCATACTGGAAATTATGATCCAGGATTACTTTATCAA-----

-----TTACCATCT-----ACTTCAGAGATC---GCTTCT----

--GAAACA-----TTTTTCAAATACAAA---AGTTTCAGTATCTGCC-----CACGAATTAGTGAATTAG-----

-----ATG-----

AAAAATACCTTTTCTTGGATAAAGAAAGAGATTACTCGATCT-----

ATTTCCCTATCACTGATG-----ATATATATCATA---

ACTCGACATCCATTTCAAACGCATATCCCATTTTTGCACAACAGGGGTATGAAAATCCACGAGAAGCGACTGGACGTAT  
TGTATGTGCCAATTGCCATTTAGCTAATAAGCCCGTGGATATTGAGGTTCCCAAGCGGTACTGCCGGATACTGTATTTG  
AAGCAGTTGTTTCAATTCCTTATGATAGGCAAGTAAAACAAGTTCTTGCTAATGGTAAAAAAGGGGGTTTGAATGTGGGC  
GCTGTTCTTATTTTACCCGAGGGTTTTGAATTAGCCCCCCCC---  
GCTCGTATTTACCCGAGATGAAAGAAAGGATAGGC---AATCCGTCT---TTTCAGAGC---

TATCGCCCCACTAAAAAAATATTCTTGTATAGGTCCCCTCCCGGCCAGAAATATAGTGAAATAACCTTTCCTATTCT  
TTCTC

Oryza TATTTTTGGTCTATTTCATA--GGCATATATGTTTTATGGATCTGCTTACTC-

TTTTTTTTCAGAATTTGATTTAATAAAATTCCTTTGTA-----AAAGGGGGTCCGAAA---AAG-----

TATTTTTTCCATCAACTAAAAAAAAGATATATAGTTGGTCAATAATCGCGGTTATATAGATATTTTCTATACTAGGAC  
CTTTACCTTGGGTATAAGAGGATTAACCGAATAACGCAGTTTTTCGACAAGGGTGTCAATTGATGGAATTACCAATGGAG  
TAGGTCTTGCTAGTTTTTGTATAGGAGAAGAAATTAATATGTAGGGGGAGGTGCAATTTTCGTCTTATTTATTCTTTTTT  
TTATGTTATGTATCTGTGTTCTTATTCTTTTTTCTTTCTTAA-----

ATGGATTTACCTGGGCCAATACATGAAATCTTGTGCTATTTGGGGGATTTGTTCTTCTACTAGGGGGTCTAGGGGTGGT  
ATTACTTACCAACCCAACTTTTTCTGCTTTTTTCGCTAGGATTAGTTCTT---GTTTGTATATCCTTA---  
TTCTATATTTTTATTGAATTCCTACTTTGTAGCTGTGGCACAACCTCTTATTTATGTGGGAGCTATAAATGTCTTGATCAT  
ATTTGCCGTAATGTTTCGTAATGGCTCAGAATGGTCTAAAGATAAGAATTTT-----  
TGGACTATTGGAGATGGGTTCACTTCACTCGTTTGATAACTATTCTTTTTTCACTAATGACTACTATCCCAGATACGTC  
ATGGTATGGAATTTCTTTGGACTACAAGATCAAACCAAATAGTAGAACAGGGTCTCATAAATAACGTTCAACAAATTGGGA  
TTCATTTAGCAACCGATTTTTATCTTCCATTTGAACTCATTTCATAATTCTTCTAGTTTCTTTAATAGGTGCAATTACT  
ATGGCTCGGCAATA-----

-----ATGAGT-----

CTACCGCTTACAAGAAAAGATCTCATGATAGTCAATATGGGCCCTCAGCACCCATCAATGCATGGTGTCTTTCGACTGAT  
CGTTACTCTCGATGGTGAAGATGTTATTGATTGTGAACCCATATTAGGCTATTTACACAGAGGAATGGAAAAAATCGCGG  
AAAACCGAACTATTATACAATACTTACCTTATGTAACACGTTGGGATTATTTAGCTACTATGTTTACAGAAGCAATAACG  
GTAAATGCACCAGAATTCCTGGAGAATATTCAAATACCCCAAAGAGCCAGCTATATTAGGGTAATTATGTTAGAATTGAG  
CCGTATAGCTTCTCACTTGTATGGCTTGGACCTTTTTATGGCAGATCTCGGTGCGCAGACTCCTTTTTTTTTATATTTTA  
GAGAGAGAGAATTAATATATGATCTATTTGAAGCTGCTACAGGTATGCGAATGATGCATAATTACTTTTCGCATCGGAGGA  
GTTGCTGCCGATCTGCCTTATGGATGGATCGATAAATGTTTAGATTTCTGTGATTATTTTTTACGAGGAGTTATTGAATA  
TCAACAACCTTATTACACAGAATCCCATTTTTTTGGAACGAGTTGAGGGAGTTGGTTTTATTAGCGGAGAAGAAGCTGTAA  
ATTGGGGCTTATCGGGCCCCATGTTACGAGCTTCTGGAATACAATGGGATCTTCGTAAGTTGATCTTTACGAGTCTTAC  
AATCAATTCGATTGGAAGTCCAATGGCAAAAAGAAGGGGATTCTATTAGCACGCTATTTAGTACGAATCGGTGAAATGAG  
GGAATCCATCAAATTAATCAACAGGCTGTAGAAAAAATTCCTGGGGGCCCTTATGAGAATTTAGAAGTCCGACGCTTTA  
AG-----AAAGCA---

AAGAATTCGGAATGGAATGATTTTTGAATATCGATTTCTTGGTAAAAAACCTTACCCCAATTTTGAATTTGCAAAACAAGA  
GCTTTATGCAAGAGTGAAGCCCCAAAAGGTGAATTAGGAATTTATCTGGTAGGAGATGATAGTCTTTTTCCCTGGAGAT  
GGAAAATTCGTCCACCCGGTTTTTATTAATTTGCAAATTCCTCCTCAGCTAGTCAAAAAAATGAAATTTGGCTGATATCATG  
ACGATATTAGGTAGTATAGATATCATTATGGGAGAAGTTGATCGTTGAATGTTCCCTATGGTAACTGGGTTTCATG-----

GGTCAACAAACAATACGCGCAGCAAGGTACATTGGTCAAAGTTTCATAATTACCTTATCCCACACAAATCGTTTACCTAT  
AACGATTCCTACTACCCCTATGAAAAATCAATTACATCGGAGCGTTTTCCGGGGCGAATCCACTTTGAATTTGATAAATGTA  
TTGCTTGTGAAGTATGTGTTTCGCGTATGCCCTATAGATCTACCTCTTGTGGATTGGAGATTTGAAAAGGATATTTAAAAGG  
AAACAATTTGCTTAATTATAGTATTGATTTTCGGAGTTTGTATATTTTGTGGTAATTGTGTTGAGTACTGTCCGACAAACTG  
TTTATCAATGACTGAAGAATATGAACTTTCTACTTATGATCGTCATGAATTGAATTACAATCAAATTTGCTTTGAGTCCGT  
TACCAATCTCCATAATGGGAGATTACACAATTCAAACAATTAGGAATTCAACTCAAAGTAAAATAGACGAAGAAAAATCT  
TGAATTCAGAACGATTACTGATTACTAG-----

ATGCAGCAGGGTTGGTTATCTAATTGGCTAGTCAAACATGAGGTGGTTCATAGATCTTTGGGCTTCGATCATCGAGGAAT  
AGAGACTTTGCAAATAAAAGCAGAGGATTGGGATTCATTGTCTGTCATTTTATATGTATATGGTTACAATTATTTACGTT  
CCCAATGTGCTTATGACGTTGCACCCGGTGGATCTTTAGCTAGCGTGTATCATCTTACGAGAATACAGTATGGTATA---  
GATAACCCAGAAGAAGTATGCATAAAAGTCTTTGCCCAAAGGATAAATCCTAGAATCCCATCTGTCTTCTGGATTTGGAG  
AAGTTCCGATTTTCAAGAACGCGAATCTTTTGTATGTTGGGAATCTCTTATGATAATCATCCACGCCTTAAACGTATCC  
TAATGCCTGAAAGTTGGATAGGCTGGCCCTTACGTAAGGACTATATAACCCCAATTTCTATGAAATACAAGATGCTCAT  
TGA-----

-----ATGGTCTTA---ACTGAATATTCA---GACAAAAA-----

GAAGGAAA---GATTCCATTAAGACAGTTATGAGTTTGATT---

GAGTTTCCCCTACTTGACCAAAGAAGTTCCAATTCGTTATTTCA-----

ACTACACTAAAAGATCTTTGCAATTGGTCAAGACTCTCTAGTTTATGGCCCCTTCTATATGGTACCAGTTGTTGTTTCAT  
TGAATTTGCTTCAATTAATAGGCTCACGATTTCGACTTTGATCGTTATGGATTGGTACCAAGATCAAGTCTTAGGCAAGCGG  
ACCTAATTTTAAACAGCCGGTACAGTAACAATGAAAATGGCTCCCTCTTTAGTGAGATTATATGAGCAAATGCCTGAACCA  
AAATACGTCATTGCTATGGGAGCTTGTACTATTACTGGTGAATGTTTCAGTACGGATTTCCTATAGTACT---

GTTCCGGGAGTTGATAAGTTAATTCCTGTGGACGTCTACTTGCCGGGTTGCCACCTAAACCAGAGGCTGTTATAGATGC  
CCTAACAAAACCTTCGTAAGAAGATATCGCGAGAAATAGTTGAGGAT---CGAACTCTATCT-----CAAAGAAA-  
-----AATCGATGTTTTACT-----ACCAGCCACAAGCTTTATGTT-----  
CGGCGCAGTACTAATACTGGAACCTTATGAGCAAGAATTGCTCTATCAA-----  
-----TCACCATCT-----ACTTTAGACATA---TCTTCT----  
--GAAACT-----TTTTTCAAATCCAAA---AGTCCAGTATCTTCC-----TACAAATTAGTGAATTAG-----  
-----ATGGAA---  
AATAGAAATACTTTTTCTTGGGTAAAGGAACAGATGACTCGATCG-----  
ATTTCTGTATCGATCATG-----ATATACGTAATA---  
ACTCGGACATCTATTTCAAATGCATATCCCATTTTTGCGCAGCAAGGTTATGAAAACCCACGAGAAGCAACTGGACGAAT  
TGTATGTGCCAATTGCCATTTAGCGAATAAGCCTGTGGATATTGAAGTTCCCAAGCAGTGCTTCCCGATACTGTATTTG  
AAGCAGTTCTTCAATTCCTTATGATATGCAACTGAAACAAGTTCTTGCTAATGGGAAAAAGGGAGGTTGAATGTGGGT  
GCTGTTCTTATTTTGCCCGAGGGATTGCAATTAGCGCCGCC---  
GACCGTATTTCTCCTGAGTTGAAAGAAAAGATAGGA---AATCTCTCT---TTTCAGAGT---  
TATCGTCCCAATAAAAAAATATTCTTGTGATAGGCCCTGTTCCCGGTAAGAAATATAGTGAAATCGTCTTTCCCATCT  
TTCC  
Panax           TTTTTTTTGGAATCTTTATA---  
GCCTCCTTTTTATATAAACCCGTTTATTCTCTTTGCAAAATTTGGACTTAATTAACTCGTTTGT-----  
AAAATAGGTCCTAAG---AGA-----  
ATTTTTTTGGACAAAATAATAAATGGTATATATGGTTGGTTCGTGTAATCGTGGTTACATAGATGCTTTTTATGCAACATT  
CTTTACTGGGGGGATAAGAGGATTGGCCGAATTGACTTCTTTTTTTGATAGACAAGTAATTGATGGAATTACAAATGGAG  
TTGGTGTTTTGGAGTTTTTTGTAGGCGAAAGTATCAAATCTGTAGGTGGGGGGCGCATCTTCTTATCTTTTCTTGTAT  
TTGCTTATGTATCAATCTTTTTATTAATTTACTACTTTTTTAGATCTATAA-----  
-----  
ATGGATTTACCTGGACCAATACATGATTTTCTTTTAGTCTTTCTGGGATCGGGTCTTATATTAGGAGGTCTGGGAGTGGT  
ATTACTTCCCAATCCAATTTATTCCGCCTTTTCATTGGGATTGGTTCTT---GTTTGTACATCTTTA---  
TTCTATATTCTATCGAACTCCCATTTTGTAGCTGCTGCACAGCTCCTTATTTATGTAGGGGCCATAAATGTTTTAATTCT  
TTTTGTCTGTGATGTTCAATGAATGGTTCGCAATATTACAAAGATTTTCATCTT-----  
TGGACCATTTGGAGTGGGGTTACTTCGATGGTTTTGTACAAGTATTTTTGTTTTCTACTAATTACTACTATTCCAGATACGTC  
ATGGTACGGGATTATTTGGACTACAAAATCAAACCAGATTATAGAGCAAGATTTGATAAGCAATAGTCAACAAATTGGGA  
TTCATCTATCAACAGATTTTTTTCTTCCATTTGAACTCATTTCAATAATTCTATTAGTTGCGTTAATAGGTGCAATTGCC  
GTAGCTCGTCAATAA-----  
-----ATGACT-----  
GCATCAGCTACACGAAATGACCTTATGATAGTCAATCTGGGTCTCAGCACCCATCAATGCACGGTGTCTTTCGACTCAT  
TGTTACTCTAGATGGTGAAGATGTTATTGACTGTGAACCAATATTGGGTTATTTACATAGAGGGATGGAAAAAATTGCGG  
AAAACCGAACAATTATACAGTATTTACCTTATGTAACACGTTGGGATTATTTAGCTACTATGTTTACAGAAGCAATAACT  
GTAAATGCACCAGAGCAGTTAGGCAATATTCAAGTACCTAAAAGGGCCAGCTATATCAGAGTCATTATGTTGGAGTTAAG  
TCGTATAGCTTCGCATTTGTTATGGCTTGGCCCTTTCTGGCAGATATTGGCGCACAGACCCCTTTCTTCTATATTTTTTC  
GAGAAAGAGAATTGATATATGACCTATTCGAAGCTGCCACCGGTATGCGAATGATGCATAAATTATTTTCGGATCGGAGGA  
GTAGCTGCTGATTTACCTCATGGATGGATAGATAAATGTTTGGATTTTTGTGATTTTTTTTTTAAACAAGGGTTACTGAATA  
TCAAAAACCTTATTACACGGAACCCCTATTTTTTTAGAACGGGTTGAAGGAGTAGGCATTATTGGCGGAGCGGAGGCAATAA  
ATTGGGGTTTATCAGGACCAATGCTACGAGCTTCCGGAATACAATGGGATCTTCGTAAAGTTGATCATTATGAGTCTTAC  
GACGAATTTGATTGGGGGGTCCAATGGCAAAAAGAGGGGGATTCTTAGCTCGTTATTTAGTACGAATCAGTGAATGAC  
AGAATCCATAAAAAATAATTCAACAGGCTTTAGAAGGAATCCGGGGGGGCCCTATGAGAATTTAGAAATCCGACGTTTTG  
AT-----AAAGTA---  
CGGGATCCTGAATGGAATGATTTTACTATCGATTATCAGTAAAAAACCTTCTCCGACTTTTGAATTATCAAAGCAAGA  
ACTTTATGTGAGAGTCGAAGCCCCCAAGGGAGAATTGGGGATTTTTCTGATAGGGGATAGGGGTGTTTTTCTTGGAGAT  
GGAAAATCCGACCACCGGTTTTATCAATTTGCAAATCCTTCTCAGTTAGTTAAAAGAATGAAATTGGCTGATATTATG  
ACGATACTAGGTAGCATAGATATAAATTATGGGAGAAGTTGATCGTTAAATGTTCTCTATGGTAACTGAGTTCATGAACTA  
TGGTCAACAAACAGTACGAGCTGCAAGGTATATTGGTCAAGGTTTCATGATTACCTTATCACACGCGAATCGTTTTACCTG  
TAACTATTCAATACCCCTACGAAAAATTGATTACATCGGAGCGTTTTCCGCGGCCGAATTCACTTTGAGTTTGATAAATGC  
ATTGCTTGTGAAGTATGTGTTTCGTGTATGTCCTATAGATCTACCCGTTGTTGATTGGAAATTGGAAATGGATATTCGAAA  
GAAACGATTGCTTAATTACAGTATTGATTTCCGGAATCTGTATATTTTTGTGGTAATTGCGTTGAGTATTGTCCAACAAATT  
GTTTATCAATGACTGAAGAATATGAACTTTCTACGTATGATCGTCACGAATTGAATTATAATCAAATTGCTTTGGGACGG  
TTACCGATGGCAGTAATTGACGATTACACAACCTCGAATTTTTGAATTTGCCTGAAATAAAAAATGCTTGA-----  
-----ATGCAG---



GGTCGTTTGTCTGCTTGGTTAGTCAAGCATGGGCTAATTCATAGATCTTTGGGGTTTGGATTACCAAGGGATAGAGACTTT  
ACAAATAAAACCCGAGGATTGGCATTCCATTGCTGTCATTTTATATGTATATGGTTACAATTATCTACGCTCCCAATGCG  
CCTATGATGTAGCACCAGGTGGACTGTTAGCTAGTGTGTATCATCTTACGAGAATAGAGTATGGCGTG---  
GATCAACCAGAAGAGGTATGCATAAAAGTATTTGCCCCGAGGAGGAATCCTCGAATTCGGTCTGTTTTCTGGGGTTTGGAA  
AAGTGTGGATTTTCAAGAACGGGAATCTTATGATATGTTGGGAATCTTTTATGCTACTCATCCACGTTTTGAAACGCATCT  
TAATGCCTGAAAGTTGGGTAGGATGGCCTTTACGTAAGGATTATATTGCCCCCAATTTTTTATGAAATACAAGATGCTCAT  
TGA-----

-----ATGAATTCCATC---  
GAGTTTCCCTTACTTGATCGAACAACCCAAAATTCAGTTATTTTCA-----  
ACTACATCAAATGATCTTTCAAATTGGTCAAGACTCTCTAGTTTTATGGCCGCTTCTCTATGGTACTAGTTGTTGCTTCAT  
TGAATTTGCTTCACTAATAGGCTCACGATTCGACTTTGATCGTTATGGACTAGTCCCAAGATCGAGTCTTAGACAAGCGG  
ACCTAATTTTAAACAGCCGGAACAGTAACAATGAAAATGGCTCCTTCTTTAGTGAGATTATATGAGCAAATGCCTGAACCA  
AAATATGTTATTGCTATGGGAGCATGTACAATTTCCAGGGGGGATGTTCCAGTACTGATTCTTATAGTACT---  
GTTCCGGGAGTCGATAAGCTAATTCCTGTCGATGTCTATTTGCCAGGCTGTCCACCTAAACCCGAAGCAGTTATAGATGC  
TATAACAAAACCTTCGTAAAAAATATCTCGAGAAATCTATGAAGAT---AGAATTAAGTCT-----CAACGGGAG-  
-----AATCGGTGTTTTACA-----ACCAATCACAAGTTTTCAGGTT-----  
GGGCGTAGTATTCATACTGGAAATTATGATCGAGGGTTTCTTTATCAA-----  
-----CCGCCATTT-----ACTTCAGAGATC---CCTTCC-----  
--GAAACA-----TTTTTCAAATACAAA---AGTTCAGTCTCGTCC-----CACGAATTAGTGAATTAG-----  
-----ATGCAA---

ACTAGAAAGACTTTTTCTTGGATAAAGGAACAGATTACTCGATCC-----  
ATTTCCGCATCGCTCATG-----ATATATATCATA---  
ACTCGGACATCCATTTCAAGTGCATATCCCATTTTTGCACAGCAGGGTTATGAAAATCCACGAGAAGCGACTGGGCGTAT  
TGTATGTGCCAATTGCCATTTAGCTAATAAGCCCGTGGATATTGAAGTTCACAAAGCCGTACTTCTGATACTGTATTTG  
AAGCAGTTGTTTCAATCCCTTATGATATGCAACTAAAACAAGTTCTTGCTAATGGTAAAAAGGGGGCTTTGAATGTAGGG  
GCTGTTCTTATTTTACCAGGAGGTTTTGAATTAGCTCCTGTT---  
GATCGGATTTCTCCCGAGATGAAAGAAAGGATAGGC---AATCTTTCT---TTTCAGAGC---  
TATCGCCCCACTAAAAAATATTTCTTGTGATAGGCCCTGTTCTTGGTCAAAAATATAGTGAATCACCTTTTCTATTCT  
TTCC

Pelargonium TTATTTTGAATAGTTATA---  
GCCTCTGTTTTATATAAGCCTAATTATTTATCTTTAAACAAAATTGAACCTTACTGAATCTCTTTGTT-----  
AAAGGAGGTCTAAT---AAG-----  
ATTTTTGGGGACAGAATAAGAAATCGGATATATGATTGGTTCGTATAATCGTGGTTACATAGACACTTTTTTACGCAATATC  
CTTAGCTAGGGGTCTAAGAGGATTTCGCTGAATTCACTCATTTTTTTGATGCGCGAGTTATTGATGGAATTACGAACGGGA  
TGGGTATTTTGGTTTTTTTTTTAGGCGAAGGCATCAAATGTGTAGGGGGCGGTTCGCTTTCTTCTTATCTTTTTATTGTAT  
TTTGATTGTGATTGCTTTTTTTTATTCATTTCTTCTTTTTGTACTTGTTCATTTTTGA-----

ATGGATTTGCCCGACCAATACACGATTTTCTTTTAGTTTTCTGGGATCAGGTATTATATTAGGGGGTCTAGGGGTCGT  
ATTACTTACCAACCCAAATTTATTCTGCCTTTTCTTTGGGATTTGTTTT---ATTTGTATATCTTTA---  
TTTTATATTCTATCAAACCTCTATTTTGTAGCTGCTGCACAGCTCCTTATTTATGTAGGAGCTATAAATGTTTTAATACT  
ATTTGCTGTGATGTTTATGAATGGTTTCAAGATATTACAAAGATTTTTCATCTT-----  
TGGACTCTTGGGGATGGGCTTACTTCACTAATTTGTACAATTTCTTTTTCTTCTACTAATTACTACTATTCTAGATACATC  
ATGGTATGGTATTCTTTGGACTACAAAATCAAACCAGATTATAGAGAAAGATTTTATAAGTAATAGTCAACAACCTGGAA  
TTCTTTTATCAACAGATTTTTTTCTTCCATTTGAACTCATGTCTATAATTTCTTTTAGTTGCTTTGCTAGGTGCAATTGCT  
GCGGCTCGTCAGTAA-----

-----ATGACT-----  
ATACCAGCTACAAGAAAAGACCTCATGATAGTCAATATGGGCCCTCACCACCCATCAATGCACGGTGTCTTTCGGCTCAT  
CCTTACTCTAGATGGTGAAGATGTTATCGACTGTGAACCCGTATTGGGTTATTTACACAGAGGGATGGAAAAAATTGCCG  
AAAATCGAACTATTATACAATATCTGCCTTATGTAACACGTTGGGATTATTTGGCTACTATGTTTACAGAAGTAATAACT  
GTAAATGCCCCAGAGCAATTGGGAAATATTCAAGTACCTAAAAGGGCTGGCTATATCAGAACAATTATGCTGGAATTAAG  
TCGTATAGCTTCTCATCTATTATGGCTTGGACCCTTTATGGCCGATATTGGCGCACAAACCCCTTTTTTTATATTTTCA  
GAGAAAGAGAATTAATATATGATCTGTTTGAAGCAGCCACCGGTATGAGAATGATGCATAAATTTTTCTGATCGGAGGA  
GTTGCAGCCGATCTACCTCATGGCTGGATAGATAAATGCTTGGATTTCTGTAATTATTTTTTAAACAGGACTTGCTGAATA  
TGAAAAGCTTATTACGCGGAATCCTATTTTTTTTAGAGCGAGTAGAGGGAATAGGCATTATTGGTAAAGAAGAAGCAATAA  
GTTGGGGTTTATCAGGACCAATGCTACGAGCTTCCGGAATGCAATGGGATCTTCGTAAAATCGATAATTCTGAATGTTAC  
AAAAAATTCGATTGGGAGGTTCAAGTGGCAAAAAGAAGGAGATTATTAGCTCGCTATTTAGTCCGAATCGGTGAAATGAG

GGAATCCATAAAAAATGATTCAACAGGCTCTGGAAGGAATTCGGGAGGTCCTTATGAGAATTTAGAAAATTCGATGTTTTG  
AT-----AGAGAA---  
AGGTATCCAGAATGGGGCGGTTTTGAATATCGATTATTAGTAAAAAACCTTCTCCTACTTTTTGAATTGCCGAAACAAGA  
ACTTTATGTGAGAGTTGAAGCCCCAAAAGGAGAATGGGAGTTTTTCTGATAGGAGATCGGAGCAGCTTTCCTTGGAGAT  
GGAAAATACGTCCACCGGGTTTTATGAATTTGCAAATTTCTCCTCAGTTAGTTAAAAGAATGAAATTGGCTGATATTATG  
ACAATACTAGGTAGCATAGATATCATTATGGGAGAAGTTGATCGTTGAATGTTCCCTATGGTAACTGGATTTCATGAATTA  
TGGTCAACAAACCGTACGAGCCGCAAGGTACATTGGTCAAAGTTTGATTATTACCTTATCCCACTCAAATCGTTTTCCCTG  
TAACTATTCAATATCCCTATGAAAAATTAATGACATCGGAGCGTTTTTCGCGGTGCAATTCATTTTTGAATTTGATAAATGC  
ATTGCGTGTGAAGTATGTGTTTCGTGTATGCCCCGATAGATCTACCTGTTGTTGATTGGAAAATTTGAAAGGGATATTCGAAA  
GAAACGCTTACTTAATTACAGTATTGATTTTTGGAATTTGTATATTTTGTGGTAATTGCGTTGAGTATTGTCCAACAAAT  
GTTTATCGATGACCGAAGAATATGAACTTTCAACCTATGATCGTCACGAATTGAATTATAATCAAACCTGCTCTGGGTCGT  
TTACCAATGCCAGTAATTGATGATTATAACAATTCGAACCATTTTTAATTTACCTAAAATAAAAAGCAAGTAA-----

-----ATGCAG---

GGTCTTTGTCTGCTTGGCTAGTCAAACGTAGGCTAGTTCATAGATCGTTGGGTTTTCGATTATCAAGGAATAGAGACTTT  
AGAAATAAAGTCCGAGGATTGGCATTCCGTTGCTGTCATTTTATATGTATATGGTTACAACCTATCTACGTTTCGCAATGTG  
CTTATGATGTAGCACCAGGCGGACTCTTGGCTAGTGTATAACCATTTTACGAGAATTGAATATGGCATA---  
GATCAACCGGAAGAGGTATGCATAAAAGTCTTTCTTGCAAGGAGTAATCCTAGAATTCGCTCGATTTTTCTGGGTTTGGAA  
AAGTGCAGATTTTTCAAGAAAGGGAATCTTATGATATGTTGGGAATCTCTTATGATAATCATCCGCGACTGAAACGTATTT  
TAATGCCTGAAAGTTGGATAGGATGGCCCTTACGTAAGGATTATATTGCTCCCAATTTTTTATGAAATACAAGATGCTCAT  
TGA-----

-----ATGAATTCGTC---

GAGTTTCCCTTACTTGATCGAAGAACCAAAAATTCAGTGATTTCA-----  
ACTACATCAAACGATCTTTCAAATTTGGTCAAGGCTCTCCAGTCTATGGCCACTTCTTTATGGTACGAGCTGTTGTTTCAT  
TGAATTTGCTTTCATTAATAGGCTCACGATTTGACTTTGATCGTTATGGACTCGTACCAAGATCAAGTCCCTAGACAGGCGG  
ACCTTGTATTAACAGCTGGTACAGTAACAATGAAAATGGCTCCCTCTTTAGTGAGATTATATGAACAAATGCCCGAACCA  
AAATATGTTATTGCTATGGGAGCCTGTACAATTACAGGAGGAATGTTTCAGTACAGATTCTTATAGTACT---  
GTTCCGGGAGTTGATAAGCTAATTCCTGTAGATGTTTTATTTGCCGGGTTGTCCGCCTAAGCCAGAGGCAGTTATAGATGC  
TATAACAAAACCTTCGTAAGAAGATATCTAGAGAAATCTATGAAGAT---CGAGTTAGGTCT-----CAACGGGTT-  
-----AATCGCTATTTTACT-----ACCAATCACAAGTTTCTTATT-----  
GGACGCAGTATTCATATCGGAAATTCGTATAAAGGATTCTTATACCAA-----  
-----CCACCAGCT-----ACTTCAAAACTA---CCGGCT-----  
--GAAAAA-----TTTTTCAAATACAAA---AGTTTCAGCACCTTCACCTTCTCACGAATTAGTGAATTAG-----  
-----ATGCAA---

ACTAGAAAGACCCTCTCTTGGATAAAGGAAGAGATTACTCGATCC-----  
ATTTCCCTATCGCTAATG-----CTATCTATAATA---  
ACTCATGCATCCCTTTCAAATGCATATCCCATTTTTGCGCAGCAAGGTTATGAAAATCCGCGAGAAGCGACTGGGCGTAT  
TGTATGTGCGAATTGCCATTTAGCCAATAAGCCTGTGGATATTGAGGTTCCACAAACGGTACTTCTGATACTGTATTTG  
AAGCAGTTGTTGCAATTCCTTATGATATGCAAATTAACAAGTTCTTGCTAATGGTAAAAAAGGGGCTTTAAATGTAGGA  
GCTGTTCTTATTTTACCCGAGGGGTTTTGAATTAGCCCCCTCT---  
GATCGTATTTGCCCCGAGATGAAAGAAAAGATAGGC---AATCTTCTCT---TTTCAGAGC---  
TATCGCCCCACTCAAAAAAATATTCTTGTGATAGGTCTGTTTCTGGTCAAAAATATAGTGAATCGCCTTTCCTATTCT  
TTCC

Phalaenopsis -----

TTTCTGGAATCAGTTCTTATATTAGGAGGTCTGGGAATAGTATTACTTACCAATCCCATTGATTCTGCCTTTTTATTGGT  
ATTGGTTCTTCTTGTGTTGTATATCCGTA--  
ATTCTATAGTTTTTTTTAATTCCTATTTTGTAGCTGCCACTCAGTTGTTTTATTT--  
GTGGGAACCATAAATGTATTAATCATATTTGCTGTGCTGTTTATGAACGGTTCATAATATTCCAATGATTCTTCTATTTG--  
----CAGACCTTTGGAATAGGATCACTTCATTGGTTTGTACAAATCTTTTTTTTTTC-----





AAGCAGTTGTTAAGATCCCCTATGATATGCAGATGAAACAAGTTCTTGCTAATGGCAAGAAAGGGGCTTTAAATGTAGGA  
GCTGTTCTAATTTTACCCGAGGGCTTTGAATTAGCCCCCTCCG---  
GATCGTATTTCCCCTGAGATTAGACAAAAGACGGGT---AATCTTTAT---TTTCAGAAC---  
TATCGTCCCAATAAAAAAACATTATTGTAATAGGTCCTGTTCCCGGTCAAAAATATAGTGAACCTTGTGTTCCCCATCCT  
TTCAC

Piper ATTGTTTGGAAATATTCATA---  
GCGTCTTTTTTATATGGGTCTGTTTTTTCATCTTTTAAAAGTTTGGACTTAATTAATTCATTTGAA-----  
ACAAAAGGCAAAAA---AGA-----  
ATTTTTTTAGATCGAATTTTAAATGTAATATATAAATTGGTCAGATAATCGTGGTTATATAGACACCCTTTTTTCTACTCTA  
TTTAACTAGAAATATAAGAAAGTTGTCCGAATTAACCCATTCTTTTGACAAACGGCTGATTGATGGAATTACCAATGGGG  
TTGGTGTTCGAGTTTTTTTTGTGGGAGAGGGGTTCAAATACGTAGGAGGGGGGCGCATTTCTTCTTACTTGTGTTGTGAT  
CTATCTTATGTATCCGTTTTTTTTTAGTAGTAATTTACTACTTCGTTTTGTGA-----

ATGGGTTTACCTGGACCAATACATGATATTCTTTTAGTATTTTTGGGGTCGGGTATTGTATTAGGAAGTCTAGGGGTAAT  
ATTACTTACCAATACAATCTATTCTGCTTTTTCTTTGGGTTTCGTTCTT---GTTTGTATATCCTTA---  
TTTTTATATTCTATCTAATTCCTATTTTGTAGCCGCCGCGCAGCTCCTTATTTACGTGGGAGCCATAAATGTTTTAATAAT  
ATTTGCTGTGATGTTTATGAAAGTTTCCAGAAATTTCCAACGATTTTTCTATT-----  
TGGACTGTTGGGGATGGGGTTACTTTCATTAGTTTGTACAAGTATCTTTTTTTCATTAATTACTACTATCTTGGATACATC  
ATGGTACGGTATTATTTGGACTACAAGATCAAACCAGATTATGGAGCAAGACCTTTTAAGTAACGTTCAACAAATTGGAA  
TTCATCTAGTAACCGATTTTATTCTTCCATTTGAACCTATTTCAATAGTTCTTTTAGTTGCTTTGATAGGTGCAATTGCT  
ATGGCTCGTCAGTAA-----

-----ATGACT-----  
GTACCGGCTACAAGAAAAGATCTGATGATAGTCAATATGGGTCCACACCACCCATCAATGCACGGTGTCTTCCGGCTCAT  
CGTCACTCTAGATGGTGAAGATGTTATTGACTGTGAACCCATATTGGGTTATTTACACAGAGGGATGGAAAAAATTGCGG  
AAAATCGAACAATTATACAATATTTACCTTATGTAACCCGTTGGGATTATTTAGCTACTATGTTTACAGAGGGCAATAACG  
GTAAATGCACCAGAGCAGTTGGGAAATATTCAAGTACCTAAAAGAGCTAGCTATATCAGAGTAATTATGCTGGAGCTGAG  
TCGTATAGCTTCTCATTATTTATGGCTTGGACCTTTTATGGCGGATATCGGTGCACAAACTCCTTTCTTCTACATTTTTA  
GAGAGAGGGAATTACTGTATGATCTATTTGAAGCTGCCACAGGTATGCGAATGATGCATAATTACTCCGTATCGGAGGG  
GTAGTACCCGATCTGCCTTATGGTTGGATAGATAAAATGTTTTGATTTCTGTGATTATTTTTTAAACAGGAGTGGTGGAAATA  
TCAAAGCTTATCACGCAAAATCCTATTTTTTTGGAACGAGTTGAAGGGATAGGCATTATTGGTGGAGAAGAAGCAATAA  
ATTGGGGTTTATCAGGACCGATGTTACGAGCTTCCGGCATCCAATGGGATCTTCGTAAAGTTGATCGTTATGAGTGTAT  
GATGAATTCAATTGGGAAGTCCAATGGCAAAAAGAGGGGGATTCAATTATCTCGTTATTTAGTACGAATCGGTGAAATGAC  
GGAGTCCATAAAAATTATTCAACAGGCTCTAGAAGGAATCCCAGGGGGGCCCTATGAGAATTTGGAAGTACGGCGCTTTG  
AT-----AAAACA---

AAGGATTCGGAATGGAATGATTTTTGAATATCGATTCAATTAGTAAAAAACCTTCCCCCTCTTTTGAATTGTCTAAACAAGA  
ACTTTTATGTAAGAGTAGAAGCTCCAAAGGGAGAATTGGGAATTTTTTTGATAGGGGATAATAGTGTTTTTTCCCTGGAGAT  
GGAAAATCCGTCGCCCGGTTTCATTAATTTGCAAATTTCTCCTCAGCTAGTTAAAAGAATGAAATTGGCCGATATCATG  
ACGATACTAGGTAGTATAGATATCATTATGGGGGAAGTTGACCGTTGAATGTTCCCTATGATAACTGGGTTTCATGAATTA  
TGGTCAACAAACAGTACGAGCCGCAAGATACATTGGTCAGAGTTTCGCGATTACCTTATCTCACACGAATCGGTTACCTG  
TAACTATTCAATATCCTTATGAAAAATCAATCACATCAGAGCGTTCCGCGGTGCAATCCACTTTGAATTTGATAAATGT  
ATTGCTTGTGAAGTATGTGTTTCGTGTATGTCCCATAGATCTACCTGTTGTAGATTGGAAATTAGAAACAGATATTCGAAA  
GAAAAGGTTGCTTAATTATAGTATTGATTTTTGGAATATGTATATTTTGTGGTAATTGCGTCGAGTATTGTCCGACAACT  
GTTTATCAATGACTGAAGAGTATGAACTTTCTACCTATGATCGTCACGAATTGAACTATAATCAAATTGCTTTGGGTGCG  
TTACCAATATCAGTAATTGAAGACTATACAATTCAAACAAACAATTATGAATTGAACTCATATAAAAAAATGACAGACAA  
ACCTCTCGACTCAGAAAAGATTACCAATTA-----

-----ATGCAG---  
GGTCGTTTTATCTGCTTGGCTAGTCAAGCACGAGCTAGTTTCATAGATCTTTGGGCTTCGATTACCGAGGAATAGAGACTTT  
ACAAATAAAGTCGGAGGATTGGTATTCCATTGCTGTCAATTTTATATGCATATGTTTACAATTATCTACGTTCCCAATGTG  
CTTATGATGCAGCGCCGGGCGGGTTGTTAGCTAGCGTATATCATCTTACGAGAATACAGTATGGTATA---  
GATCAACCAGAAGAGGTATGCATCAAAGTATTTGTCCCAAGGACAAATACTAGAATCCCCTGCTGTTTTCTGGATTGGAA  
AAGCGCGGACTTTCAAGAGCGAGAATCTTATGATATGCTGGGAATCTCGTATGAGAATCACCCACGTCTGAAACGTATCT  
TGATGCCCGAAAGTTGGATAGGCTGGCCCTTACGTAAAGATTATATTGCCCCTAATTTCTATGAAATACAAGATGCCCAT  
TGAATGGGCAATGAGTTTCGATGTATTGGGTGTATCCGATTTTATAGAAGCTTTTTATTTTTCGTGCTTATCCCAATTGTTG  
GTTTCAGTTTTATGCATGGCGAAAAGGAGCGTTGGAATGGTCTTAGTCCCTGAATATTCA---  
AATAATAAAAACAAAAAGAAGAAAA---GCTTACATCGAGACAGTTATGAACTCTATG---  
AAGTTTCCGTTACTTGTATCGAACAACCTCAAAGTTTCAGTTATTTCA-----  
ACTACATTGAATGACCTTTCGAATTGGTCAAGACTTTCCAGTTTATGGCCACTTCTATATGGTACCAGTTGTTGCTTCAT

TGAGTTTGGCTTCATTAATAGGCTCGAGATTGCACTTTGATCGTTATGGACTAGTACCAAGATCAAGCCCTAGGCAAGCAG  
ACCTCATTTTAACAGCTGGCACAGTAACAATGAAGATGGCTCCTTCTTTAGTAAGATTATATGAGCAAATGCCTGAACCA  
AAATATGTCATTGCTATGGGAGCTTGTACTATTACGGGGGAATGTTTAGTACCGATTCTTATAGTACT---  
GTTTCGGGGAGTCGATAAGCTAATTCCTGTGGATGTCTATTTGCCGGGCTGTCCGCCTAAACCAGAAGCAATTCTGGATGC  
TATAACGAAACTTCGTAAGAAGGTCTCTCGAGAAATTTATGAAGAT---AAGATTGGGTCT-----CAACGGGAA-  
-----AATCGATATTTTACT-----  
ACCAATCACAAGTTTCATGTTCCCAAGTCTCATGTTGGGCGCAGTACTCATATTGAAAATTATGATCAAGGATTACTTTC  
TCAA-----  
TCTTCATCT-----ACGCCCCGAAATA---GCCTCT-----GAAAAC-----TTTTTCAAATACAAA---  
AGTTTAGTACCT-----AATTATGATATGAATTAG-----  
ATGCAA---AATAGAAATACATTTTCTTGGGTAAAGGAACCGATAAATCGATCT-----  
ATTTCTGTATTGATCATT-----ATATATGTAATA---  
ACTCAGACATCTATTTCAAATGCATATCCTATTTTTGCACAGCAGGGTTATGAAAATCCACGAGAAGCAACTGGACGTAT  
TGTATGCGCCAATTGCCATTTAGCTAATAAACAGTAGATATTGAGGTTCCACAAGCGGTACTCCCGGATACTGTATTTG  
AAGCAGTTGTTTCAATCCCTTACGATTCACAACGAAACAAGTTCTTGCTAATGGTAAAAAGGGGGGGTTGAATGTGGGG  
GCTGTTCTTATTTTACCCGAGGGATTTGAACTAGCCCCCG---  
GATCGTATCTCTCCCGAGATGAAAGAAAAGATAGGC---AATCTATCT---TTTCAGAGC---  
TATCGCCCCAATAAAAAAATATTCTTGTAATAGGTCCCGTTCTGGTCAAAAATATAGGGAAATTTTATTTCCATTCT  
GTCTC  
Platanus           CTATTTTGGAAATTTTATA---  
GCGTCTCTTTTATATAGGCCTGTTTATTCATCTTCCAGAATTTGGAATTAATTAATTTTTTTGTG-----  
AAAATGGGTCTAAT---AGA-----  
ATTCTCTGGGACCAACTACTAAATATTATATACAATTGGTCAATAATCGCGGTTACATAGATTTTTTTTTATGCAAAAAC  
TTTCATTAGGGGTATAAGAGGATTAGCTGAACTAACTCATTTTTTTGATAGACGAGTAATTGATGGAATTACGAATGGGG  
TTGGTGTACAAGTTTCTTTGTAGGAGAAGGGATCAAATATGTAGGGGGCGGGCGAATCTCTTCTTATCTCTTCTTGTAT  
TTATCTTATGTATTAATCTTTTTATTAATTTCTTATTTTTTGTTTTTGAATCTATA-----  
-----  
ATGGATTTACCTGGACCAATACATGATTTTCTTTTAGTTTTCTGGGATCAGGTCTTATATTAGGGGGTCTGGGAGTGGT  
ATTACTTACCAATCCAATTTATTTCTGCCTTTTCTGGGATTGGTTCTT---GTTTGTATATCCTTA---  
TTCTATATTTCCATCGAACTCCCATTTTGTAGCTGCTGCGCAGCTCCTTATTTACGTGGGAGCCATAAATGTCTTAATCAT  
ATTTGCTGTGATGTTTCAATGGTTTCAAGTATTACAATGATTTCCATCTT-----  
TGGACTGTTGGAGATGGAGTCACTTCACTGCTTTGTACAAGTATTTTTGTTTCACTAATTACTACTATCCCAGACACGTC  
ATGGTACGGGGTTATTTGGACTACAAGATCAAACCAGATTATAGAGCAGGACTTGATAAGTAACGGTCAACAAATTGGAA  
TTCATTTATCAACAGATTTTTTTCTTCCATTTGAACTCATTTCTATAATTCTTTTAGTTGCCTTAATAGGTGCAATTGCT  
ATGGCGCGTCAGTAA-----  
-----ATGACT-----  
GTACCAGCTACAAGAAAAGACCTCATGATAGTCAATATGGGTCCTCACCATCCATCAATGCATGGTGTCTTTCGACTCAT  
CGTTACTCTAGATGGTGAAGATGTTATTGACTGTGAACCCGATTGGGTTATTTACACAGAGGGATGGAAAAAATTGCAG  
AAAACCGAACAATTATACAATATCTGCCTTATGTAACACGTTGGGATTATTTAGCTACTATGTTTACAGAAGCAATAACC  
GTAAATGCACCGGAACAGTTGGGAAATATTCAAGTACCTAAAAGAGCCAGCTATATCAGAGCAATTATGCTGGAGCTGAG  
TCGTATAGCTTCTCATTTGTTATGGCTTGGTCCTTTTATGGCGGATATCGGTGCACAGACTCCTTTTTTCTATATTTTA  
GAGAGAGAGAGTTAATATATGATCTATTGCAAGCTGCCACAGGTATGCGAATGATGCATAATTATTTCCGTATCGGAGGA  
GTAGCTGCTGATTTACCTCATGGCTGGATAGATAAATGTTTGGATTTCTGCGACTATTTTTTAAACAGGGATTGCTGAATA  
TCAAAAGCTTATTACGCGGAATCCCATTTTTTTGGAGCGAGTCAAGGGGTGGGCATTATTGGTGGAGAGGAAGCAATAA  
ATTGGGGTTTATCAGGACCAATGTTACGAGCTTCCGGGATCCAATGGGATCTTCGTAAAGTTGATCATTATGGGTGTTAT  
GACGAATTTGATTTGGGAAGTCCAATGGCAAAAAGAAGGAGATTCAATTAGCTCGTTATTTAGTACGAATCAGTGAATGAC  
GGAATCCGTAAAAAATTATCAACAGGCTTTGGAAGGAATCCGGGGGGCCCTATGAAAATTTAGAAGTCCGACGCTTTG  
AT-----AGAGCA---  
AGGGATTCCGAATGGAATGATTTTTGAATATCGATTATTAGTAAAAAGCCTTCTCCACTTTTTGAATTGTGCAAAACAAGA  
ACTTTATGTGAGAGTGAAGCCCCAAAAGGGGAGTTGGGAATTTTTCTGATAGGAGATCAGAGTGTTTTTCCCTGGAGAT  
GGAAAATTCGTCCACCGGGTTTTATTAATTTGCAAATTTCTCCTCAGCTAGTTAAAAGAATGAAATTTGGCTGATATTATG  
ACGATACTAGGTAGTATAGATATTATTATGGGAGAAGTTGATCGTTGAATGCTCCCTATGGTAACTGGGTTCATGAATTA  
TGGTCAACAAACAGTACGAGCTGCAAGGTACATCGGTCAAAGTTTTCATGATTACCTTATCCCACGCGAACCGTTTACCTG  
TAACTATTCAATATCCTTATGAAAATTTGATCACATCGGAGCGTTTCCGTGGTCAATACACTTTGAATTTGATAAATGC  
ATTGCTTGTGAAGTATGTGTTCTGTGATGCCCTATAGATCTACCCGTTGTTAATTGGAGATTAGAAACCGATATTCGAAA  
GAAACGATTACTTAATTACAGTATTGATTTTTGGAATCTGTATATTTTTGTGGTAACTGCGTCGAGTATTGTCCAACAAAT  
GTTTATCAATGACTGAAGAATATGAACTTTCTACTTATGATCGTCACGAATTGAATTATAATCAAATTTGCTTTGGGCCGA

TTACCAATATCAGTAATTGGAGATTACACAATTCGAACAATTATGAATTCGACTCAAATAAAAAATAGCCACGGGGAAACC  
CCTTGATTCAAAAACGATTACCAATTACTAG-----  
-----ATGCAG---

GGTCGTTTTGTCTGCTTGGCTAGTCAAGCATGGGCTAGTTCATAGATCTTTGGGCTTCGATTACCAAGGAATAGAGACTTT  
ACAAATAAAGTCCGAGGATTGGCACTCCATTGCTGTCATTTTCATATGTATATGGTTACAATTATCTACGTTCCCAATGTG  
CCTATGATGTAGCACCAGGCGGACTATTAGCTAGTGTGTATCATCTTACGAGAATACAGTATGGTGTG---  
GATCAACCGGAAGAGGTATGCATAAAAGTATTTGCCGCAAGGAGGAATCCTAGAATTCGGTCTGTTTTCTGGATTTGGAA  
AAGTGCAGGATTTCCAAGAACGGGAATCTTATGATATGTTGGGAATCTCTTATGATAATCATCCACGCCTGAAACGGATCT  
TGATGCCTGAAAGTTGGATAGGATGGCCCTTACGTAAGGATTATATTGCCCCCAATTTCTATGAAATACAAGACGCTCAT  
TGAATGGGCAATGAGTTTCGATGTGTTGGGTGTACCCGATTTTATAGAAGCTTTAATTTTTGTGCTTATCCTAATTGTTG  
GTTCAATTTATGCATGGCGAAAAGGAGCATTGGAATGGTCTTAGCTCCCAAATATTCA---  
GACAATAAAAAGAAAAAGAAAAA---AATGACATTGAGACAGTTATGAATTCATT---  
GAGTTTCCGTTACTTGATCGAACAACCTCAAATTCAGTTATTTCA-----  
ACTACACCGAATGATCTTTCAAATTTGGTCAAGACTCTCCAGTTTATGGCCGCTTCTCTATGGTACCAGTTGTTGCTTCAT  
TGAATTTGCTTCATTAATAGGCTCACGATTGACTTTGATCGTTATGGACTGGTACCAAGATCGAGTCTTAGACAAGCGG  
ATCTTATTTTAAACAGCCGGCACAGTAACAATGAAAATGGCTCCTTCTTTAGTGAGATTATATGAGCAAATGCCTGAACCA  
AAATATGTCATTGCTATGGGAGCCTGTACTATTACAGGAGGGATGTTCACTACCGATTCTTATAGTACT---  
GTTCCGGGAGTCGATAAGCTAATTCCTGTGGATGTCTATTTGCCGGGTTGCCACCTAAACCGGAGGCAGTTATAGATGC  
TATAACGAAACTTCGTAAGAAGGTATCTCGAGAAATCTATGAAGAT---AGAATTTGGCCT-----CAACAGGAG-  
-----AGTCGATGTTTTACT-----ACCAATCACAAGTTTTCATGTT-----  
GGACGCAGTACTCATACTGGAAATTATGATCAAGGGTTACTCTATCAA-----  
-----TCACCATCT-----ACTTCAGAGATC---CCTTCT---  
--GAAATA-----TTTTTCAAATACAAA---AGTTTCAGTATCTTCC-----CATGAATTAGTAAATTAG-----  
-----ATGCAA---

AATAGAAATACCTTTTCTTGGATAAAAGAACAGATGACTCGATCC-----  
ATTTCCGTATCGATCATG-----ATATATGTAATA---

ACTCGGACAGCCATTTCAAATGCATATCCCATTTTGCACAGCAGGGTTATGAAAATCCACGAGAAGCGACTGGTCTGAT  
TGTATGTGCTAATTTGCCATTTAGCTAATAAAGCCCGTGGATTTAGAGTTCCACAAGCGGTACTTCTGATACTGTATTTG  
AAGCAGTTTGTAGAATCCCTTATGATATGCAAGTGAACAAGTTCTTGTCTAATGGTAAAAAGGGGGCTTTGAATGTAGGG  
GCTGTTCTTATTTTACCTGAGGGATTGCAATTAGTCCACCC---  
GATCGTATTTCTCCCGAGATGAAAGAAAAGATAGGC---AAGTTGTCT---TTTCAGAGT---  
TATCGCCCTACTAAAAAAATATTCTTGTGATAGGTCCTGTTCCCTGGTCAGAAATATAGTGAAATAACTTTTTCTATTCT  
TTCC

Populus           TTCTTTTGGGATATTTATA---

GCGTCTTCTTTATATAAGCCGATTTATTCATCCTTACAAAATTTGAAATTCCTTAATTTGGTTGCT-----  
AAAAAAGGTCCTAAG---AGA-----  
ATTCTTTGGGACAAAATAATAAATGTGATATATGATTGGTCCATAATCGTGGTTACATAGATGTTTTTTTATACAATATC  
TTTAACAGAAGGCATAAGAAGATTGGCAGGAAATTAATCTTTTTTTTGGATAGACGAGTAATTGATGGAATTACCAATGGAG  
TTGGCTTTACGAGTTTCTTTGCAGGAGAAGGCATAAAATATGTAGGAGGTGGTCGCATCTCTTTTTTATCTCTTATTATAT  
TTATTTTATGTATTAATCTTTTTTATTAATTTCTTCATCCATTTTTTCTTCTTTTTCTTCTTTGTGA-----  
-----

ATGAATTTACCTGGACCAATACATGATTTTCTTTTAGTCTTTCTAGGATTAGGTCTTATATTAGGAGGTCTAGGAGTGGT  
ATTACTTACCAATCCCATTTTTTCTGCCTTTTCATTAGGATTGGTTCTT---GTTTGTATATCCTTA---  
TTCTATATTTTATCAAATCTCATTGTTAGTGTGCGGCGCAGCTCCTTATTTATGTGGGAGCTATAAATGTTTTAATTTT  
ATTTGCTGTGATGTTTCATGAATGGTTTCAAGATATTACAAAGATTTCAATCTT-----  
TGGACTGTTGGGAATGGTCTTACTTCTCTAATTTGTACAAGTCTTTTTGTTTTACTAATTACTATTATTTCAAATACAAC  
ATGGTATGGGATTTATTTGGACTACAAGAGCAAACCAGATTATAGAGCAAGATTTGGTAAGTAATGGTCAACAAATTTGGAA  
TTCATTTATCAACAGATTTTTTTCTTCCATTTGAATTTATTTCAATAATTTCTTTTAGTTGCTTTGATAGGTGCGATTGCC  
ACGGCTCGTCAGTAA-----  
-----ATGAAT-----

GTACCAGCTACAAGAAAGGACTTTATGATAGTCAATATGGGTCCCCACCACCCATCAATGCATGGCGTTCTTCGACTCAT  
CCTTAGTCTAGACGGTGAAGATGTTATTGACTGTGAACCAATATTAGGTTATTTACACAGAGGGATGGAAAAAATTCGCG  
AAAACCGAACAATTATACAATATTTGCCTTATGTAACACGTTGGGATTATTTAGCTACTATGTTTACAGAAGCGATAACA  
ATAAATGGACCGGAACAGTTGGGAAATATTCAAGTACCTAAAAGAGCTAGCTATATCAGAGTAATTATGTTGGAGTTGAG  
TCGTATAGCTTCTCATCTCTTATGGCTTGGCCCTTTTATGGCAGATATTGGTGGGCAGACCCCTTTCTTCTATATTTT  
GAGAAAGAGAGTTAATATATGATTTATTCGAAGCTGCCACTGGTATGAGAATGATGCATAATTATTTTCGTATCGGAGGA  
GTAGCAGCTGATCTACCTCATGGCTGGCTAGATAAATGTTTGGATTTCTGCGATTATTTTTTAAACAGGAGTTGCTGAATA

TCAAAAACCTTATTACGCGAAATCCTATTTTTTTAGAACGCGTTGAAGGAATAGGTATTGTTAGTGCAGAGGAAGCAATAA  
ATTGGGGTTTATCAGGACCAATGCTACGAGCTTCCGGAGTACGATGGGATCTTCGTAAAGTTGATCATTATGAGTGTAT  
GACGAATTTGATTGGGGAGTCCAGTGGCAAAAAGAAGGGGATTATTAGCTCGTTATTTAGTCCGAATTGGTGAATGAC  
GGAATCCGTA AAAAATTATTCAACAGGCTTTGGAAGGGATTCCAGGGGGCCCTTATGAAAATTTAGAACTCGAAGTTTTG  
AT-----AGAGAA---

AGGAATCGAGAATGGAATGATTTTTGAATATCGATTTATTAGTAAAAAACTTCTCCCGCCTTTGAATTGCCGAAACAAGA  
ACTTTATGTTTCGAGTTGAAGCACCAAGGGAGAGTTGGGAATTTTTCTAATAGGGGATCAAAGTAGTTTTCTTGGAGAT  
GGAAAATTCGCCCCCGGGTTTTATCAATTTGCAAATTTCTTCTCAATTAATTAAGAATGAAATTGGCTGATATTATG  
ACAATACTAGGTAGCATAGATATTATTATGGGGGAAGTTGATCGTTGAATGTTCCCTATGGTAACTGGGTTTCATGAATTA  
TGGTCAACAAACCATAACGGGCTGCAAGGTACATTTGGTCAAAGTTTCATGACTACCTTATCCCACGTAATCGTTTACCTG  
TAACTATTCAATATCTTTATGAAAAATTAATCACATCGGAGCGTTTTCCGCGGTGCAATCCATTTTGAATTTGATAAATGC  
ATTGCTTTGTGAAGTATGTTTCGTGTATGTCCTATAGATTTACCTGTTGTTGATTGGGAATTGGAACTAATATTGAAA  
GAAACGATTGCTTAATTACAGTATTGATTTTCGGAATCTGTATATTTTTGTGGCAACTGTGTTGAGTATTGTCCAATAATT  
GTTTATCAATGACTGAAGAATATGAACTTTCTACCTATAATCGTCACGAATTGAATTATAACCAAATTGCTTTAGGTCGT  
TTACCAATGTCAGTAATTGACGATTATAACAATTCGAACAATTTTGAATTCACCTCAATCTTTAATCAAAATGGGCAAACC  
CCCTTTGATTAAAGATTGA-----

-----ATGCGG---  
GGTCTCTGTCTGCTTGGCTGGTCAAACATGGGCTAGTTCATAGATCTTTGGGCTTTGATTACCAAGGAATAGAGACTTT  
ACAAATAAAGCCCCGAGGATTGGCATTCCATTGCTGTCTATTCTATATGTATATGGTTACAACATCTGCGTTCCCAATGTG  
CCTATGATGTAGCACCAGGGCGGGCTGTTAGCTAGTATATATCATCTTACGAGAATAGAATATGGTATTCTAGATCAACCT  
GAAGAAGTATGTATAAAAGTATTTGCTCCTAGGAAGAATCCTAGAATTCATCTGTTTTCTGGGTTTGGAAAAGTGC  
TTTTCAAGAAAGAGAATCTTATGATATGTTGGGAATCTTATGATAATCATCCACGCTGAAACGTATCTTAATGCCGG  
AAAGTTGGATAGGGTGGCCTTTACGTAAAGATTATATTGCTCCCAATTTTTATGAAATACAAGATGCTCATTGA-----

-----ATGAATTCCATT---

GAGTTTCCCTTACTTGATCGAACAACCCCAATTTGAGTTATTTCA-----  
ACTACATCAAAATGATCTTTCAAAATGGTCAAGACTTCCAGTTTATGCGCGCTTCTCTATGGTACCAGTTGTTGCTTCAT  
TGAATTTGCTTTCATTAATAGGCTCACGATTGACTTTGATCGTTATGGGCTAGTACCAAGATCTAGTCTAGACAAGCGG  
ACCTGATTTTAAACAGCCGGCACAGTAACCATGAAAATGGCTCCTTCTTTAGTGAGATTATATGAACAAATGCCGGAACAA  
AAATATGTTATTGCTATGGGAGCATGTACAATTACAGGGGGAATGTTGAGTACGATTCTTATAGTACT---  
GTTCCGGGAGTTCGATAAGCTAATTCCTGTAGATGTCTATTTGCCGGGCTGCCCTCCTAAACCGGAGGCGATTATAGATGC  
TATAACAAAACCTTCGTAAAAAATATCTCGAGAGATTTATGAAGAT---CGAATTAGGTCT-----CAACAGGGG-  
-----AATCGGTGTTTTACT-----ACCAATCACAAGTTTCATATT-----  
GGACGTACTACTAATACTGGAAATTATGATCAAGGATTACTCTATCAA-----  
-----CCGCCGTCT-----ACTTCAAAAATA---GCTCCT----  
--GAAGCC-----TTTTTCAAATACAAA---AAGTCAGTATCGTCC-----TCTGAATTAGTAAATTAG-----  
-----ATGCAA---

ACTAGAAAGACCCTCTCTTGGATAAAGGAAGAGATTACTCGCTCC-----  
ATTTCCGTATCGCTCATG-----ATATATATAATA---  
ACTGGGGCATAACATTTCAAATGCATATCCCATTTTTGCACAGCAGGGTTATGAAAATCCGCGCGAAGCAACTGGTCTGAT  
TGTATGCGCGAATTGTCATTTAGCTAATAAGCCCGTGGGTATTGAGGTTCCACAAGCGGTACTTCTGATACTGTATTTG  
AAGCAGTTGTTTCGAATTCCTTATGATATGCAACTAAAACAAGTTCTTGCTAATGGTAAAAAGGGAGCTTTGAATGTGGGG  
GCTGTTCTTATTTTACCTGAGGGGTTTGAATTAGCCCCCTCT---  
GATCGTATTTCCGAGAGATGAAAGAAAAGATAGGT---AATCTCTCT---TTTCAGAGT---  
TATCGCCCCGCTAAAAAATATTCTTGTGATAGGTCCCGTTTCTGGTCAAAAATATAGTGAATCACCTTTCTATTCT  
TTCTC

Ranunculus TTATTTTCGGAATATTTATA---  
GCCTTATTTTTATATGGTCTGCTTATTTCATATTTTCATAATTTTAACTTAATAAATTTTTTTATT-----  
AAAAGAGGCCCTCAT---AGA-----  
ATTCTCTGGGACAAAATTATAAATCGAGTATATAATTGGTCAATAATCGTGGTTACATAGATATTTTTTATGCAAAAAT  
ATTAATTGCGGGTATAAGAGGATTAGCCGACTTTACTTATTTTTTTGATAAAAAAGTAATTGAGGGGAATTGTGAATGGTA  
TTGGTGTATAAGTTTTTTTTGTGCGAGAAAGTATTAATAACGTAGGTGGGGGCGAATATCTTCTTATCTATTCTTTTAC  
TTATTTTTATGTAGCTGTTTTTTTTAGTAATTTGCCTTAACTAA-----

ATGGATTTACCTGGACCAATACATGATTTTTCTTCTAGTTTTTTTTGGGGTTAGGTTTTATAATGGGAGGTCTAGGAGTGGT  
ATTACTACCAATCCCATTTTTTCTGCCTTTTCATTAGGGTTGGTTCTT---GTTTGTACATCCTTA---



TTCTATACTCCATCGAACTCTCATTGTCGCTGCTGCACAGCTCCTTATTTATGTAGGAGCAATAAATGTATTAATTAT  
ATTTGCTGTGATGTTTCATGAATGGTTCCAGAATATTACAGCGATTTCCATCTT-----  
TGGACCGTTGGAGATGGAGTTACTTCACTAGTTTGTACAAGTATTTTTGTTTCACTAATTACTACTATCCCAGATAACATC  
ATGGTACGGGATTGTTTGGACTACAAGATCAAACCAAATTATAGAGCAGGACTTGATAAATAATAGTCAACAAATTGGGA  
TTCATTTATCAACGGATTTTTTCTTCCATTTCGAACCTTATTTTCGATAATTTCTTTTAGTTGCCTTGATTGGTGAATTTCC  
ATGGCTCGGCAGTATTAA-----  
-----ATGACT-----  
GTACCAACTACAAGAAAAGATCTCATGATAGTCAATATGGGTCCTCAACACCCATCAATGCATGGTGTCTTTCGACTCGT  
CGTTACTCTAGATGGGGAAGATGTTATTGACTGTGAACCCATATTGGGTTATTTACACAGAGGAATGGAAAAAATTGCGG  
AAAATAGAACAATTATAACAATATCTTCCCTTATGTAACACGTTGGGATTATTTAGCGACTATGTTTACAGAGGCAATAACG  
GTAATGGACCAGAACAGTTGGGAAATATTCAGTACCAAAAAGAGCAAGCTATATTAGAGTAATTATGCTAGAACTGAG  
TCGTATAGCTTCTCATTATTATTATGGCTTGGCCCTTTTATGGCGGATATTGGTGCAGACTCCTTTCTTTTATATTTTCC  
GAGAAAGGGAATTAATATATGACCTATTTCGAATCTGCCACAGGTATGCGAATGATGCATAAATTATTTCCGTATTGGGGG  
GTCGCTGCGGATCTACCTTATGGCTGGATAGACAAATGTTTGGATTCTGTGATTATTTTTTAAACGGGGTTACTGAATA  
TCAAAAGCTTATTACGCGCAATCCCATTTTTTTTGGAACGAGTTGAAGGGTGGGCATTATTGGTGGAGAAGAAGCAATAA  
ATTGGGGTTTATCAGGGCAATGCTACGAGCTTCCGGAATTCATGGGATCTTCGTAAAGTCGATCATTATGAGTGTTAC  
GACGAATTTGATTGGGAAGTGCAGTGGCAAAAAGAAGGAGATTATTAGCTCGTTATTTAGTCCGAATTAGTGAAATGAC  
GGAATCCATAAAAATTCTTCAACAAGCTCTGGAAGGAATTCGGGGGGGCCCTATGAAAATTTAGAGGTACGCCGCTTTG  
AT-----AGAGCA---  
AAGGATTCGCAATGGAATGATTTTGGATTATCGATTATTAGTAAAAAGCCTTCACCCACTTTTGAATTATCTAAACAAGA  
GCTTTATGTGAGAGTAGAAGCCCCAAAAGGAGAATTGGGGATTTTTCTGGTAGGAGATAAGAGTGTTTTTCCCTGGAGAT  
GGAAAATTCGCCACCTGGTTTTATCAATTTGCAAATTTCTCCTCAGTTAGTTAAAAGAATGAAATTTGGCCGATATTATG  
ACAATACTAGGTAGTATAGATATTATTATGGGAGAAGTTGATCGTTGAATGTTCCCTATGGTAACTGGGTTTCATGAATTA  
TGGACAACAAACGGTACGAGCTGCAAGGTATATTGGTCAAAGTTTGTATGATTACTTTATCTCACGCGAATCGTTTACCTG  
TAACGATCCAATATCCTTATGAAAAAGTATCAGATCAGAGCGTTTCCGTGGACGAATCCACTTTGAATTTGATAAATGC  
ATTGCTTGTGAAGTATGTGTTTCGGGTATGTCCTATAGATCTCCCGTTGTTGATTGGAAATTTGGAACTAATATTCGAAA  
GAAACGATTGCTTAATTATAGTATTGATTTCCGGAATCTGTATATTTTGTGGTAACTGCGTTGAATATTGTCCAACGAATT  
GTTTATCAATGACTGAAGAATATGAGCTTTCCGGCGTATGATCGTCACGAGTTGAATTATAATCAAATTTGCTTTGGGTGCG  
TTACCAATGTCAGTGATTGGAGATTACACAATTCGAACAATTCGAATTCAACTCAAACAGAAATAGCCACGGGTAAACG  
ATTTGATTCAAAAACAATTACTAATTATTAA-----  
-----ATGCAG---  
GGTCGTTTGTCTGCTTGGCTAGCGAAGCATAGGCTAGTTCATAGATCTTTGGGCTTCGATTACCAAGGAATAGAACTTT  
ACAAATAAAGCCCCGAGGATTGGCACTCCATTGCTGTCAATTTTATATGTATATGGTTACAATTATCTACGCTCTCAGTGTG  
CGTATGACGTAGCACCGGGCGGACTATTAGCTAGTGTGTATCATCTTACGAGAATACAGTATGGTGTG---  
GATCAACCAGAAGAGGTATGCATAAAAGTATTTGCCCAAGGAGGAATCCTAGAATTCATCTGTTTTCTGGATTTGGAA  
AAGTGCAGGATTTTCAAGAACGGGAATCTTATGATATGTTGGGCATCTCTTATGATAATCATCCACGCTTGAACGAATTT  
TGATGCCTGAAAGTTGGATAGGATGGCCTTTACGTAAGGATTATATTGCCCTAATTTTTTATGAAATTCAGATGCTCAT  
TGA-----  
-----ATGAATTCATT---  
GAGTTTCCATTACTTAATCAAACAACCCAAAATTCAGTTATTTCA-----  
ACTACATCAAACGATCTTTTCGAATTGGTCAAGACTCTCCAGTTTATGGCCGCTTCTCTATGGTACCAGTTGTTGCTTCAT  
TGAATTTGCTTCATTAATAGGCTCGCGATTTCGACTTTGATCGTTATGGACTGGTACCAAGGTCGAGTCTTAGGCAAGCGG  
ACCTCATTTTAACAGCGGGCACAGTAACGATGAAAATGGCGCCTTCTTTAGTGAGATTGTATGAGCAAATGCCCGAACCA  
AAATATGTCATTGCTATGGGAGCCTGTACTATTACAGGAGGGATGTTTCAGTACCGATTCTTATAGTACT---  
GTTCCGGGAGTCGATAAGCTAATTCCTGTGATGTTTATTTGCCGGTTGTCTCCGAAACCAGAGGCAGTTATAGATGC  
TATAACAAAACCTTCGTA AAAAGGTATCTCGAGAAATCTATGAAGAT---AGGGTTGGGTCT-----CAACAGGAG-  
-----ACTCGATGTTTTACT-----ATCAACCACAAATTTCTGTGTT-----  
GGCCGTAGTACTCATACTGGAAATTATGATCAAGGATTGCTCTACCAA-----  
-----TCGCCATCT-----ATTTAGAGATA---  
CCTTATGAAAATGAAACA-----TTTTTAAAATACAAA---ATTGCGGTATCTTCC-----  
CACAAATTAGTGAATTAG-----ATGCAA---  
AATAGAAATATCTTTTCTTGGATAAAGGAACAGATGACTCGATCC-----  
ATTTTCGTATCGATCATTATATTTATATATGTAATA---  
ACTCAGCCATCTATTTTACATGCATATCCATTTTTTGCAACAGGGTTATGAAAATCCTCGAGAAGCAACTGGGCGTAT  
TGTATGCGCCAATTTGTCATTTAGCTAATAAGCCTGTGGATATTGAGGTTCCACAAGCGGTACTTCCAGATACTGTATTTG  
AAGCAGTTGTTTCGAATTCCTTATGATATCCAAGTGAACAAGTTCTTTCTAATGAAAAAGGGTTCTTTGAATGTGGGG

GCCGTTCTTATTTTACCTGAGGGATTTCGAATTAGCCCCCCCC---  
AACCGTATTTTCTCCGGAAATGAAAGAAAAGATGGGC---AATCTTTCT---TTTCAGAGT---  
TATCGTCTACTAAAAAAATATTCTTGTGATAGGTCCTGTTCTGGTCAGAAATATAGCGAAATCACCTTTCCTATTTT  
GTCTC  
Spinacia TTTTTTTGGAATATTTATA---  
GCCTTCTTTTTTATAAACCTATTTATTCATCCTTAAAAAATTTTGACTTAATTAATTCATTTGAT-----  
AAAAGGGGTCAAAAG---CGG-----  
ATTTTGGGGGACAATATAATAACTATTATATACAATTGGTCTGCTAACCGTGGTTATATAGATGCTTTTTTATTCAACATT  
CTTAATTAAGGGTATAAGAAGTTTGTCTGAACTAGTTTCTTTTTTTGATAGACGAATAATTGATGGAATTCCTAATGGTT  
TTGGTGTACAAGTTTTTTTGTAGGTGAAGGTATCAAATATGTAGGAGGTGGCCGAATCTCTTCGTATCTTTTTTGGTAT  
TTATTATATGTATCCATTTTTTTTATTCAATTTTACTTTTACATAA-----  
-----  
ATGGATTTACCTGGACCAATACATGATTTTTCTTTTAGTCTTTCTGGGGTCGGGTCTTATATTAGGGGCTCTAGGAGTGGT  
ATTATTTACCAATCCTATTTTTTCTGCCTTTTTCATTGGGATTGGTTCTT---GTGTGTATATCTTTA---  
TTCTATATTCTAGCAAACCTCCCACTTTGTAGCTTCTGCACAACCTCCTTATTTATGTGGGAGCTATAAATGTATTAATCAT  
ATTTTCTGTGATGTTTCATGAGTGGTCCAGAATATGACAAAAAGTTTCAGCTG-----  
TGGACTGTTGGGGACGGGGTTACTTTCATTGGTTTGTATAAGTCTTTTTTGTTCATTAATTAGTACTATTCTAAATACATC  
TTGGTATGGGATTATTTGGACTACAAAATCAAACCAGATTCTCGAACAAGATTTAATAAACGCTAGTCAACAAATTGGAA  
TTCATTTATCAACCGATTTTTTCTTCCATTTGAACTCATTTCATAATTCTTTTAGTTTCTTTAATAGGTGCAATTGCT  
GTGGCTCGTCAATA-----  
-----ATGGCT-----  
GTACCAACTACCAGAAAAGACCTCATGATAGTCAATATGGGCCCTCACCATCCATCAATGCACGGTGTCTCCGACTCAT  
CGTTACTTTAGACGGTGAAGATGTTATTGACTGTGAACCGATAGTGGGTTATTTACACAGAGGTATGGAAAAAATTGCGG  
AAAATCGAACAATTATACAATATCTGCCTTATGTAACACGTTGGGATTATTTAGCTACTATGTTTACAGAAGCAATAACT  
GTAAATGGACCAGAACAATTGGGAAATATTCAAGTACCTAAAAGAGCTAGCTATATCAGAGTAATTATGTTGGAGTTAAG  
TCGGATAGCTTCGCATTTATTATGGCTCGGCCCTTTTATGGCCGATATTGGCGCGCAGACCCCTTTTTTCTATATTTTAA  
GAGAAAGGGAATTAATATATGATTTATTCTGAAGCTGCTACCGGTATGAGAATGATGCATAATTATTTTCGTATTGGAGGA  
GTAGTCCCGCATCTTCTTATGGATGGATAGATAAATGTTTAGATTTTTGTGATTTTTTAATAGGGCTTACTGAATA  
CCAAAAAATCTATTACGCGAAATCCTATTTTTTGAACAGGTTGAGAACGTCGGCATTATTGGTGGAGAAGAAGCAATAA  
ATTGGGGTTTATCAGGCCCAATGCTACGCGCTTCCGGAATACAATGGGACCTGCGTAAAGTTGATCATTATGAGTGTAC  
GACGAATTTGATTGGGAAGTCCAATGGCAAAAAGAAGGAGATTATTAGCTCGTTATTTAATACGAATCGGTGAAATGGC  
CGAATCTGTAAAATATAACAACAGCTCTAGAAGGAATTCCAGGGGGTCCCTATGAGAATTTAGAAATTCGACGCTTTA  
AT-----AGAATA---  
AAATATCCTGAATGGAATGATTTTGAATATCGATTATTAGTAAAAAGCCATCTCCTGCTTTTGAATTGTCGAAACAAGA  
GCTTTATGTAAGAGTCTGAAGCCCCAAAGGGAGAATTAGGAATATTTTTGATAGGAGATCAGAGTGTTTTTCTTGGAGAT  
GGAAAATTCGTCCCCGGGTTTTATCAATTTGCAAATCTTCTCAGTTAGTTAAAAAATGAAATTGGCTGATATTATG  
ACGATACTAGGTAGCATAGATATCATTATGGGAGAAGTTGATCGTTGAATGTTCCCTATGGTAACTGGGTTTCATCAATTA  
TGGTCAACAACAATACGCGCGGCAAGGTACATTGGTCAAAGTTTTATGATTACCCTATCCCATGCTAACCGCTTACCTG  
TAACTATTCAATATCCTTATGAAAAATTAATAACATCGGAGCGTTTTCGTGGTCAATTCATTTGAATTCGATAAATGC  
ATTGCTTGTGAAGTATGTGTTTCGTGCATGTCCTATAGATTTGCCCGTTGTTGATTGGAAATTGGAAACGGATATTCGAAA  
GAAACGGTTGCTTAATTACAGCATTGATTTCCGAATTTGTATATTTTGTGGTAATTGTGTTGAGTATTGTCCAACCAATT  
GTTTATCAATGACTGAAGAATATGAGCTTTCTACTTATGATCGTCACGAATTAATTATAATCAAATTGCTCTGGGTCGT  
TTACCAATATCAATAACCGATGATTACACAATTCGAACAATTTGAATTCGCCTCAAACAAA-----  
GAGAAAGCTTGGCATTGA-----  
-----ATGCAG---  
GGTCGTTTGTCTGCTTGGCTAGTCAAACACGGGTTAGTTCATAGATCCTTGGGTTTTGATTACCAAGGAATAGAGACTTT  
ACAAATAAAGCCCCGAAGATTGGCATTCCATTGCTGTTATTTTATATGTATATGGTTACAATTATTTACGTTCTCAATGTG  
CTTATGATGTAGCACCGGGCGGGCTGTTAGCTAGTGTGTATCATCTTACGAGAATAGAGTACGGCGTG---  
GATCAACCGGAAGAGGTATGCATAAAAAGTATTTGCTCCAAGCGGAATCCTAGAATTCATCCGTTTTCTGGGTTTGGAA  
AAGCGCGGATTTTCAAGAACGGGAATCTTATGATATGTTTGGAAATCTTATGATAATCATCCACGCCTGAAACGTATTT  
TAATGCCCGAAAGTTGGATAGGATGGCCCTTACGTAAGGATTATATTGTCCCGAATTTTTTATGAAATACAAGATGCTTAT  
TGAATGGGCAATGAGTTTCGATATATTGGGTGTATCCGTATTTATAGAAGCTTTAATTTTTCTGTGCTTATCCTAATTGTTG  
GTTTAGTTTTATGCATGGCGAAAAGGAGCATTGGAATGGTCTTAATTTCCCGAAGATTCC---GACAAAAAAAAGAAG---  
-----ATTGAAACAGTTATGAATTCCATT---  
GAGTTTCCACTGCTTGTATCAAATAGCCAAAATTTCTGTTATTTCA-----  
ACTACATCAAACGATCTTTCAAATTTGGTCAAGACTCTCAAGTTTATGGCCGCTTCTCTACGGTACCAGCTGTTGCTTCAT  
TGAATTTGCTTCATTAATAGGCTCACGATTTGACTTTGATCGTTATGGACTCGTACCAAGAGCGAGCCCTAGACAAGCGG

ACCTAATTTTAAACAGCCGGTACCGTAACAATGAAAATGGCGCCTTCCTTATTGAGATTATATGAGCAAATGCCTGAACCA  
AAATATGTTATTGCTATGGGAGCATGTACAATTACAGGGGGGATGTTTCAGTACCGATTCTTATAGTACT---  
GTTTCGAGGAGTTGATAAATTAATTCCTCGTGGATGTCTATTTGCCGGGCTGCCACCTAAACCCGAAGCAGTTATAGATGC  
TATAACAAAACCTTCGTAAGAAAATATCTCGGGAAATCTATGAAGAT---AGAATTAAGTCT-----CAACCGAAG-  
-----AATCGATGTTTTACT-----ATCAATCACAAGTTTTCGTGTT-----  
GGGCGGAGTATTCATACCGGAAATTATGATCAAGCATTATTATATAAATATAAA-----  
-----TCTCCATCG-----ACTTCAGAGATT---CCTCCT----  
--GAAACA-----TTTTTCAAATACAAA--AACGCAGCATCTTCC-----CGCGAATTAGTGAATTAA-----  
-----ATGCAA---  
ACTATAAATACCTTTTCTTGGATAAAAAGAACAGATTACTCGATCC-----  
ATTTCCATATCACTTATA-----TTATATATAATA---  
ACTCGGTCATCCATTGCGAATGCCTATCCCATTTTCGCACAGCAAGGTTATGAAAATCCACGAGAGGGCGACGGGACGTAT  
TGTATGTGCCAATTGCCATTTAGCTAATAAGCCCGTGGATATTGAGGTTCCACAAGCGGTCCTTCCAGATACTGTATTTG  
AAGCAGTTGTTTCGAATTCCTTATGATATGCAATTAACAAGTTTTAGCTAACGGTAAAAAGGGTGGCTTGAATGTGGGG  
GCTGTTCTTATTTTACCTGAGGGATTTGAATTAGCCCCACCC---  
GATCGTATTTCTCCAGAGATGAAAGAAAAAATGGGG---AATCTTTCT---TTTCAGAGC---  
TATCGCCCCAATAACAAAATATTCTTGTGATAGGTCCTGTTTCTGGGCAAAAATATAGTGAATTACCTTTTCTATTCT  
TGCCC  
Triticum TATCTTTGGTTTATTCATA---  
GCATATATCTTCTATGGATCCGCTTATTCTTTTTTTTTCAGAATTTGGATTTAATAAACTCTTTTTTAC-----  
AAAGGAAATCCTAAA---AAA-----  
GAATTTTTAGATCAAGTAAAAAAAATATATACAGTTGGTCATATAATCGTGGTTATATAGATATTTTCTATACTAGGGT  
CTTTACCCTCGGTATAAGAGGGTTAACCGAATAACCGGAGTTTTTTGATAAGGGTGTATTTTATGGAATTACCAATGGAG  
TGGGTCTTCTAGTTTTTTGTATAGGAGAAGAAATTAATATGTAGGGGGAGGTTCGAATCTCGTCTTATTTATTCTTTTTT  
TTATGTTATGTATCTTTGTTTTTATTCTTTTTTCTTTCTTAA-----  
-----  
ATGGATTTACCTGGACCAATACATGAGATTCTTATGCTATTTGGGGGATTTGTTCTTCTACTAGGGGGTCTAGGAGTAGT  
ATTACTTACCAACCCCATTTATTCTGCCTTTTTCGCTGGGATTAGTTCTT---GTTTGTATATCCTTA---  
TTCTATTTTTTTTATAAATTCCTACTTTGTAGCTGTGCGACAACCTCTTATTTATGTGGGAGCCATAAATGTCTTGATCAT  
ATTCGCTGTAATGTTTCGTAATGGCTCAGAATGGTCTAAAGATAAGAATTAT-----  
TGGACTATTGGAGATGGGTTCACTTCACTCGTTTGTATAACTATTGTTTTTTTCACTAATGACTACTATCCCAGATACGTC  
GTGGTATGGAATTCCTTGGACTACAAGATCAAACCAAATAGTAGAACAGGGTCTCATAAATAATGTTCAACAAATTGGAA  
TTCATTTAGCAACCGATTTTTATCTTCCGTTTGAACCTATTTCCATAATTCTTCTAGTTTCTTTAATAGGTGCAATTACT  
ATGGCTCGGCAATA-----  
-----ATGAGT-----  
CTACCGCTTACAAGAAAAGATCTCATGATAGTCAATATGGGCCCTCAACACCCATCAATGCATGGTGTCTTTCGACTGAT  
CGTTACTCTCGATGGTGAGGATGTTATTGATTGTGAACCCATATTAGGCTATTTACACAGAGGAATGGAAAAAATCGCGG  
AAAACCGAACTATTATACAATACTTACCTTATGTAACAAGGTGGGATTATTTAGCTACTATGTTTACAGAAGCAATAACA  
GTAAATGCACCAGAATTCTTGGAGAATATTCAAATACCACAAAGAGCCAGCTATATTAGGGTAATTATGTTAGAATTAAG  
CCGGATAGCTTCTCACTTGCTATGGCTTGGACCTTTTATGGCGGATCTCGGCGCACAGACTCCTTTTTTCTATATTTT  
GAGAGAGAGAATTAATATATGATCTATTTGAAGCTGCTACAGGTATGCGAATGATGCACAATTACTTTTCGCATCGGAGGA  
GTAGCCGCCGATCTACCTTATGGATGGATCGAGAAATGTTTAGATTTCTGTGATTATTTTTTACGCGGAGTTGTTGAATA  
TCAACAACCTTATTACACAGAATCCAATTTTTTTAGAGCGAGTTGAAGGAGTAGGTTTTTATTAGCGGAGAAGAAGCAGTAA  
ATTGGGGCTTATCGGGACCGATGTTACGAGCTTCTGGAATACAATGGGATCTTCGTAAAGTAGATCCTTATGAGTCTTAC  
AACCAATTTGATTGGAAAGTCCAATGGCAAAAAGAAGGGGATTCGTTAGCTCGCTATTTAGTACGAGTTGGTGAATGAG  
GGAATCCATCAAAAATAATTCAACAAGCTGTAGAAAAAATTCCTGGAGGACCTTATGAGAATTTAGAAGTCCGACGCTTTA  
AG-----AAAGAA---  
AAGAATTTCTGAATGGAATGATTTTGGAGTATAAATTTCTTGGTAAAAAACCTTCGCCCAATTTTGAATTGTCAAGACAAGA  
GCTTTATGTAAGAGTAGAAGCCCCAAAAGGTGAATTAGGGATTTATCTAGTAGGAGATGATAGCCTTTTCCCCTGGAGAT  
GGAAAATCCGTCCACCCGGGTTTATTAATTTGCAAATTTCTTCTCAGCTAGTTAAAAAATGAAATTTGGCTGATATCATG  
ACGATATTAGGTAGTATAGATATCATTATGGGGGAAGTTGATCGTTGAATGTTCCCTATGGTAACTGGGTTTCATGAGTTA  
TGGTCAACAAACAATACGTGCTACAAGGTACATAGGTCAAAGTTTCATAACTACCTTATCCCACACAAATCGTTTTACCTA  
TAACGATTTACTACCCTTATGAAAAATCAATTACACCAGAGCGTTTCCGAGGGCGAATCCACTTTGAATTTGATAAATGT  
ATTGCTTGTGAAGTATGTGTTTCGCGTATGTCCGATAGATCTACCCGTTGTGGATTGGAGATTTGAAAAGGATATTTAAAG  
AAAACAATTGCTTAATTATAGTATTGATTTCCGAGTTTGTATATTTTGTGGCAATTGTGTTGAGTACTGTCCAACAAGCT  
GTTTATCAATGACTGAAGAATATGAACCTTTCTACCTATGATCGTCATGAATTGAATTACAATCAAATTGCTTTAAGTCGG  
TTACCAATCTCCATAATGGGAGATTACACAATTCAAACAATTAGGAATTCGTCTGAAAGTAAAAATAAACAAGAAAAATC



-----ATGCAA---

AATAGAAATACTTTTTCTTGGGTAAAGGAACAGATGACTCGATCC-----  
ATTTCTGTATCGATCATG-----ATATATGTAATA---

ACTCGGGCATCTATTTCAAATGCATATCCCGTTTTTGGCGCAGCAGGGTTATGAAAACCCACGAGAAGCAACTGGACGAAT  
TGTATGTGCCAATTGCCATTTAGCTAATAAGCCCGTGGATATTGAAGTTCCGCAAGCTGTGCTTCCTGATACTGTATTTG  
AAGCAGTTGTTCGAATTCCTTATGATATGCAACTGAAACAAGTTCTTGCTAATGGTAAAAAAGGGGGTTTGAATGTGGGT  
GCTGTTCTTATTTTACCCGAGGGATTCTGAATTAGCCCCCCT---

GATCGTATTTCTCCCGAGTTGAAAGAAAAGATAGGA---AATCTGTCT---TTTCAGAGT---

TATCGTCCTAATAAAAAAATATTCTTGTGATAGGTCCTGTTCCCGGTCAGAAATATAGTCAAATTGTCTTTCCTATTCT  
TTCC

Vitis                   TTATTTTGGAAATATTTTTA---

GCGTCTCTTTTATATAATCCTGTTTATTCATCTTTACAAAATTTGGATTTAATTAATTCAGTTGCC-----  
AAAAAGTTCCTAAG---AGA-----

ATTTTTTTGGGATAAAATAATAAATAAGGTATATAATTGGTCATATAATCGTGGTTACATAGATGCTTTTTATGAAACATC  
CTTAACATAAGGGTATAAGAGGATTAGCGGAACTAACTCATTTTTTTGATGGACGAGTAATTGATGGAATTACGAATGGGG  
TTGGTGTTACGAGTTTTTTTTGTAGGAGAAAAGTATCAAATATGTAGGGGGTGGACGCATCTCCTCTTATCTTTTTTTGTAT  
TTATCTTCTGTATCAATCTTATTATTAATTTCTACTTTTTTTTTGAATCAATA-----

-----

ATGGATTTACCTGGACCAATACATGATTTTTCTTTTAGTCTTTCTGGGATCAGGTCTTATATTAGGAGGTCTAGGAGTGGT  
ATTACTTACCAATCCGATCTATTCTGCCTTTTCATTGGGATTGGTTTTTT---GTTTGTATATCCTTA---

TTCTATATTCCATCAAACCTCCCATTTTGTAGCTGCTGCACAGCTCCTTATTTACGTGGGAGCTATAAATGTTTTTAATCAT  
ATTTGCTGTGATGTTTCATGAATGGTTTCCAGAAATATTACAAAGATTTTAATCTT-----

TGGACCGTTGGAGATGGGGTTACTTCGGTAGTTTGTACAAGTATTTTTGCTTCACTAATTACTACTATTCTAGATACGTC  
ATGGTACGGGATTATTTGGACTACAAGATCAAACCAAATTATAGAGCAAGATTTGATAAGTAATAGTCAACAAATTGGAA  
TTCATTTATCAACAGATTTTTTTCTCCATTTGAACTAATTTTCGATAATTTCTTTTAGTTGCTTTGATAGGTGCAATTGCT  
GTGGCCCGTCAGTAA-----

-----ATGAAT-----

GTACCAGCTACAAGAGAAGACCTCATGATAGTCAATATGGGTCCTCATCACCCATCAATGCACGGTGTCTCTCGACTCAT  
CGTTACTTTTAGATGGTGAAGATGTTATTGACTGTGAACCAATACTAGGTTATTTGCACAGAGGGATGGAAAAAATTGCAG  
AAAACCGAACAATTATACAATATTTGCCTTATGTAACACGTTGGGATTATTTAGCTACTATGTTCCACAGAAGCAATAACC  
GTAAATGCACCAGAGCAGTTGGGAAATATTCAAGTACCTAAAAGAGCCAGCTATATTAGAGTGATTATGTTGGAGTTGAG  
TCGTATAGCTTCTCATTTATTATGGCTTGGCCCTTTTATGGCAGATATTGGTGCACAGACTCCTTTCTTCTATATTTTCA  
GAGAAAGAGAGTTAGTCTATGATCTATTGGAAGCTGCCACCGGTATGAGAATGATGCATAATTATTTTCGTATAGGAGGA  
GTAGCTGCTGATCTACCGCATGGATGGATAGATAAATGTTTGGATTCTGCGATTATTTTTAACAGGGGTTGCTGAATA  
TCAAAAACCTTATTACGCGTAATCCTATTTTTTTAGAACGAGTTGAGGGAGTAGGCATTATTGGTGTAGAAGAAGCAATAA  
ATTGGGGTTTGTGTCAGGACCAATGCTACGAGCTTCCGGAATACAATGGGATCTTCGTAAAGTTGATCATTATGAGTGTTAT  
GACGAATTTGATTGGGAAGTCCAATGGCAAAAAGAAGGAGATTCAATTATCTCGTTATTTAGTACGAATTGGTGAATGGT  
GGCATCTATAAAAATTATTCAACAGGCTCTGGAAGGAATTCGGGAGGGCCGTATGAGAATTTAGAAATCCGATGCTTTG  
AT-----AGAGCG---

AGGGATCCCGAATTGAATGATTTTTGAATATCGATTTATTAGTAAAAAGCCTTCTCCCCTTTTGAATTGTCGAAACAAGA  
ACTTTATGTGAGAGTCAAGCCCCAAAGGGAGAGTTGGGAATTTTTCTGATAGGGGATCAGAATGTTTTTCTTGGAGAT  
GGAAAATTCGACCGCCGGGTTTTATCAATTTGCAAATTTCTCCTCAGTTAGTTAAAAGAATGAAATTTGGCTGACATTATG  
ACGATACTAGGTAGCATAGATATAATTATGGGAGAAGTTGATCGTTGAATGTTCCCTATGGTAACTGGGTTTCATGAATTA  
TGGTCAACAAACAGTACGAGCTGCAAGGTATATTGGTCAAAGTTTCATGATTACCTTGTCCCACGCAAATCGTTTTACCTG  
TAATACTTCAATATCCTTATGAAAAATTGATCACATCGGAGCGTTTTCCGCGGTGCAATCCACTTTGAATTTGATAAATGC  
ATTGCTTGTGAAGTATGTGTTCTGTATGTCCTATAGATCTACCTGTTGTTGATTGGAAATTTGAAACTGATATTCGAAA  
GAAACAATTGCTTAATTACAGTATTGATTTCCGAATCTGTATATTTTGTGGTAATTGCGTTGAGTATTGTCCAACAATTT  
GTTTATCAATGACTGAAGAATATGAACTTTCCACTTATGATCGTCACGAATTGAATTATAATCAAATTTGCTTTGGGTCGT  
TTACCAATGTCAGTAATTGACGATTACACAATTCGAACAATTTGAATTCACCTCAAATAACAAGTGAATAA-----

-----ATGCAG---

GGTCGTTTGTCTGCTTGGCTAGTCAAGCATGGGCTAGTTCATAGATCTTTGGGCTTCGATTATCAAGGAATAGAGACTTT  
ACAAATAAAGCCCCGAGGATTGGCATTCCATTGCTGTCAATTTATATGTATATGGTTATAATTATCTACGCTCACAATGTG  
CCTATGATGTAGCACCAGGAGGACTGTTAGCTTAGTGTGTATCATCTTACGAGAATAGAGTATGGTGTA---  
GATCAACCGGAAGAGGATATGCATAAAAAGTATTTGCCTCAAGGAGGAATCCTAGAAATCCGCTCTGTTTTCTGGGTTTGGAA  
AAGTCCGGGATTTTCAAGAACGAGAATCTTATGATATGTTGGGAATCTCTTATGATAATCATCCACGCTGAAGCGTATCT  
TAATGCCTGAAAGTTGGATAGGATGGCCCTTACGTAAGATTATATTGCACCTAATTTTTATGAAATACAAGATGCTCAT  
TGAATGGGCAATGAGTTTCGATGTATTGGGTGTATCCGTATTTATAGAAGCTTTAATTTTTCGTGCTTATCCTAATTGTTG  
GTTTCAGTTTATGCATGGCGAAAAGGAGCATTGGAATGGTCTTAGCTCCTGAATATTCA---GACAATAAA-----  
AAGGGAAAAAATAAATTCATTGAGACAGTTATGAATTTCTATT---

GAGTTTCCCTTACTTGATCGAACAACCCAAAATTCAGTTATTTCA-----  
ACTACATCAAACGATCTTTCAAATTTGGTCAAGACTCTCCAGCTTATGGCCGCTTCTCTATGGTACCAGTTGTTGCTTCAT  
TGAATTTGCTTCATTAATAGGATCGCGATTGACTTTGATCGTTATGGACTGGTACCAAGGTGCGAGTCTTAGACAAGCGG  
ACCTAATTTTAAACAGCTGGTACAGTAACAATGAAAATGGCTCCTTCTTTAGTGAGATTATATGAGCAAATGCCTGAACCA  
AAATATGTTATTGCTATGGGAGCATGCACAATTACAGGGGGGATGTTTCAGTACAGATTCTTATAGTACT---  
GTTCCGGGGAGTCGATAAGCTTATTTCTGTGGATGTCTATTTGCCGGGCTGTCCACCTAAACCGGAGGCTGTTATAGATGC  
TATAACAAAACCTTCGTAAGAAAATATCTCGAGAAATCTATGAAGAT---AGAATCAGGTCT-----CAACAAGAG-  
-----AATCGGTGTTTTACT-----ACCAATCACAAGTTTCATGTT-----  
GGACGCAGTACTCATACTGGAAATTATGATCAAAGGTTACTCTATCAA-----

-----TCCCCATCT-----ACTTCAGAGATC---CCTCTT---  
--GAAACA-----TTTTTCAAATACAAA--AGTTTCAGTATCTTCC-----CCCGAATTTGTGAATTAG-----  
-----ATGCAA---

ACTAGAAATACCTTTTCTTGGATAAAGGAACAGATTACTCGATCC-----  
ATTTCCGTATCGCTTATG-----ATATATATAATA---  
ACTCGGACATCCATTTCAAATGCATATCCATTTTTGCACAGCAGGGTTATGAAAATCCACGAGAAGCGACTGGACGTAT  
TGTATGTGCCAATTGTCATTTAGCTAATAAGCCCGTGGATATTGAGGTTCCACAAGCGGTACTTCTGATACTGTATTTG  
AAGCAGTTGTTGCAATTCCTTATGATATGCAAATGAAACAAGTTCTTGCTAATGGTAAAAGAGGGGCTTTGAATGTGGGG  
GCTGTTCTTATTTTACCTGAGGGGTTTGAATTAGCCCCACCC---  
GATCGTATTTCCCCCGAGATGAAAGAAAAGATAGGC---AATCTATCT---TTTCAGAAC---  
TATCGCCCTACTAAAAAATATTTCTTGTGATAGGTCCTGTTTCTGGTCAAAAATATAGTGAATCACCTTTTCTATTCT  
TTCTC

Yucca

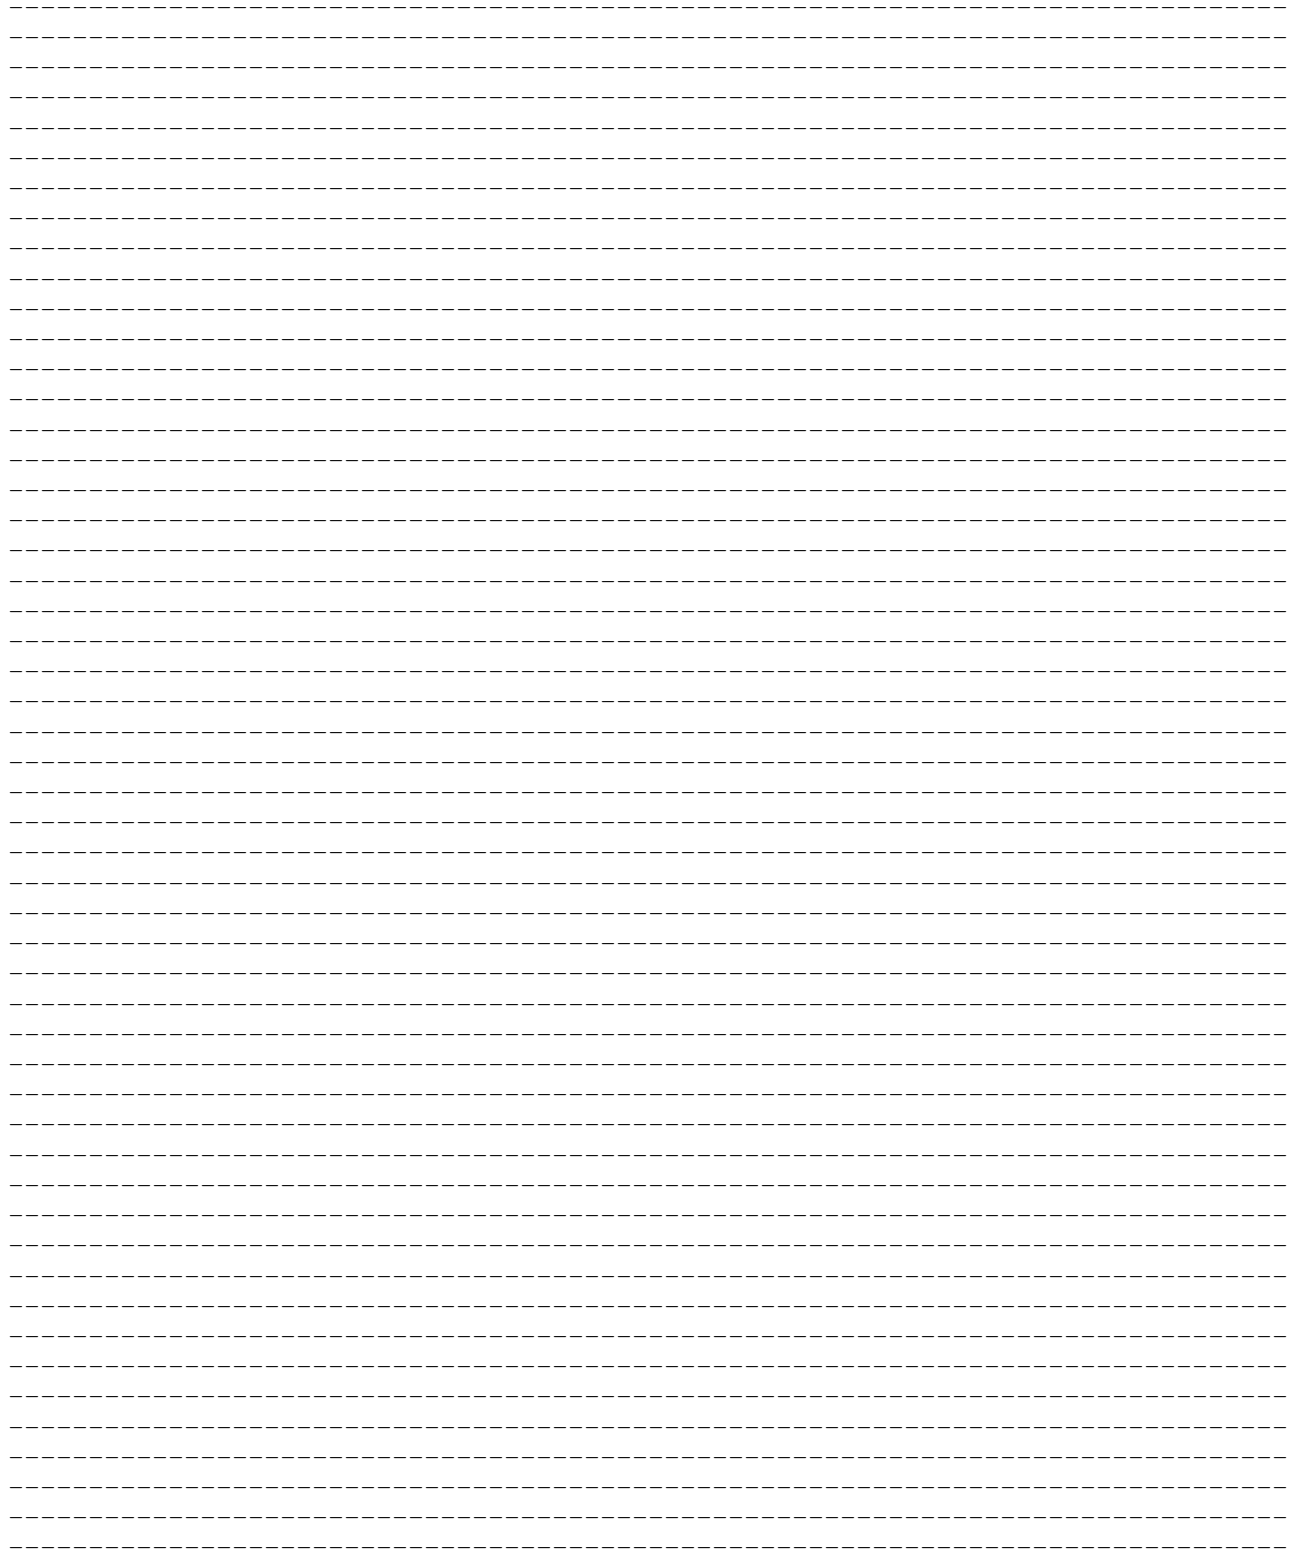

-----ATGCAA---

AATAGAAATACTTTTTCTTGGGTAAAGGAACAGATGACTCGATCT-----  
ATTTCTGTATCGATCATG-----ATATATGTAATA---  
ACTCGAACATCTATTTCAAATGCGTATCCCATTTTTGCGCAGCAAGGTTATGAAAATCCACGAGAAGCAACTGGGCGAAT  
TGTATGCGCCAATTGCCATTTAGCTAATAAGCCTGTGGATATTGAAGTTCGCAAGCTGTACTTCCTGATACTGTATTG

AAGCAGTTGTTTCGAATTCCTTATGATAAGCAACTGAAACAAGTTCTTGCTAATGGTAAAAAAGGGGCTTTGAATGTGGGG  
GCTGTTCTTATTTTACCCGAGGGATTTCGAATTAGCCCCCCC---  
GATCGTATTTCTCCCAGGTGAAAGAAAAGATAGGA---AATCTGTCT---TTTCAGAGT---  
TATCGTCCCAATAAAAAGAAATATTCTTGTGATAGGTCCTGTTCCAGGTCAGAAATATAGTGAAATCGTCTTTCCCATTCT  
TTCCC

Zea AATTTTTGGTCTATTCATA---  
GCATATATCTTTTATGGATCTGCTTATTCTTTTTTTTTCAGAATTTGAATTTTCAAATTCCTTTGTA-----  
AAAAAGAATCCAAA---AAG-----  
AGCTTTTTGGATGAAGTAAAAAAAAGATATACAGCTGGTCAATATAATCGTGGTTATATAGATTTTTTCTATACTAGGGT  
TTTTATCCTAGGTATAAGAAAGTTAGCCGAACCTAACGCATTTTTTTGATAAAGGTGTCATTGATGGAATTACCAATGGAG  
TAGGTCTTGTCTGGTTTTTTGTATAGGAGAAGAAATCAAATATGTAGGGGGAGGGCGAATATCGTCTTATCTATTCTTTTTT  
TTATGTTATGTATCCTTGTCTTATTCTTTATTCCATGA-----

ATGGATTTACCTGGACCAATACATGAGATTCTTGTGCTATTTGGGGGATTTGGTCTTCTACTAGGAGGTCTAGGAGTAGT  
ATTACTTACCAACCAATTTATTCTGCCTTTTCGCTGGGATTAGTTCTT---GTTTGTATATCCTTA---  
TTCTATTTTTTATTAAATTCCTACTTTGTAGCTGTGCGACAACCTTCTTATTTATGTGGGAGCCATAAATGTCTTGATCAT  
ATTTGCTGTAATGTTTGTAAACGGCTCAGAGTGGTCTAAAGATAAGAATTAT-----  
TGGACTATTGGAGATGGGTTTTACTTTACTCCTTTGTATAACTATTCTTTTTTCTACTAATGACTACTATCCCAGATACGTC  
GTGGTATGGAATTCCTTTGGACTACAAGATCAAACCAAATAGTAGAACAGGGTCTCATAAATAACGTTCAACAAATTGGGA  
TTCATTTAGCAACCGATTTTTATCTTCCGTTTGAACCTATTTCCCTAATTCTTCTAGTTTCTTTAATAGGTGCAATTACT  
ATGGCTCGACAATA-----

-----ATGAGT-----  
CTATCGCTTAAAAGAAAAGATCTCATGATAGTCAATATGGGCCCTCAACACCCATCAATGCATGGTGTCTTTCGACTGAT  
TGTTACTCTCGATGGTGAAGATGTTATTGATTGCGAACCCATATTAGGGTATTTACACAGAGGAATGGAAAAAATCGCGG  
AAAACAGAAGTATTATACAATACTTGCCTTATGTAACACGATGGGATTATTTAGCTACTATGTTTACAGAAGCAATAACG  
GTAAATGCACCAGAATTCTTAGAGAATATTCAAATACCCAAAAGAGCCAGCTATATTAGAGTAATTATGTTAGAATTGAG  
CCGTATAGCTTCTCATTGTTATGGCTTGGACCTTTTATGGCGGATCTCGGGGCGCAGACTCCCTTTTTCTACATTTTTA  
GAGAGAGAGAATTGATATATGATCTATTTGAAGCTGTCACAGGTATGCGAATGATGCATAATTACTTTCCGATCGGAGGA  
GTCGCTGCCGATCTCCCTTATGGATGGATGGATAAATGTTTAGATTTCTGTGATTATTTTTTACAAGGAGTTGTTGAATA  
TCAAGAACTTATTACACAGAATCCCATTTTTTTAGAACGAGTTGAAGGAGTCGGTTTTTATTAGCGGAGAAGAAGCTGTAA  
ATTGGGGCTTATCGGGACCAATGTTACGAGCTTCTGGAATACAATGGGATCTTCGTAAAATTGATCCTTATGAGTCTTAC  
AATCAATTCGATTGGAAAGTCCAATGGCAAAAAGAAGGAGATTGCTTAGCTCGCTATTTAGTACGAGTCGGTGAAATGAG  
GGAATCCATAAAAATTATTCAACAGGCTGTAGAGAAAATTCCTGGAGGACCTTATGAGAATTTAGAAGCCCCGACGCTTTA  
AG-----AAAGCA---

AAGAATCCCGAATGGAATGATTTTTGAATATCGATTTCTTGGTAAAAAACCTTCGCCCAATTTTGAATTATCAAAGCAAGA  
GCTTTTATGTAAGAGTAGAAGCTCCAAAAGGCGAATTAGGAATTTATCTGGTAGGAGATGATAGTCTTTTCCCCTGGAGAT  
GGAAAATTCGTCCACCGGGTTTTATTAATTTGCAAATCTTCTCAGCTAGTTAAAAAATGAAATTGGCTGATATCATG  
ACAATATTAGGTAGTATAGATATCATTATGGGGGAAGTTGATCGTTGAATGTTCCCTATGCTAACTGGGTTTATTAGTTA  
TGGTCAACAAACAATACGCGCCGCAAGATACATTGGTCAAAGTTTCATAATTACCTTATCCCACACAAATCGTTTACCTA  
TAACGATTCACTACCCTTATGAAAAATCAATTACATCGGAGCGTTTTCCGGGGGCGAATACACTTTGAATTTGATAAATGC  
ATTGCTTGTGAAGTATGTGTTTCGCGTATGCCCGATAGATCTACCCCTTGTGGATTGGAGATTTGAAAAGGATATTTAAAG  
AAAACAATTGCTTAATTATAGTATTGATTTCCGGAGTTTGTATATTTTGCGGTAACTGTGTTGAATACTGTCCCACAAATT  
GTTTATCAATGACTGAAGAATATGAACTTTCTACTTATGATCGTCATGAATTGAATTACAATCAAATTGCTTTGAGTCGG  
TTACCAATCTCCATAATGGGAGATTACACAATTCAAACAATTAGGAATTCGCCTCAAAGTAAAATAGACGAAGAAAAATC  
TTGGAATTCAGAACGATTACAGATTACTAG-----

ATGCAGCAGGGTTGGTTATCTAATTGGCTAGTTAAACATGACGTGGTTTCATAGGTCTTTGGGCTTCGATCATCGAGGAGT  
AGAGACTTTACAAATAAAAGCGGGGGATTGGGATTCCATTGCTGTCAATTTATATGTATATGGTTACAATTATTTACGTT  
CCCAATGTGCTTATGACGTAGCACCCGGTGGATCTTTAGCTAGCGTGTATCATCTTACGAGAATACAGTATGGTATA---  
GATAACCCAGAAGAGGTATGCATAAAAGTCTTTGCCAAAAGGATAATCCTAGAATCCCGTCCGTTTTCTGGGTTTGGAG  
AAGTGCCGATTTTCAAGAACGCGAATCTTATGATATGGTGGGAATTTCTTATGATAATCATCCACGTCTTAAACGTATCT  
TAATGCCTGAAAGTTGGATAGGCTGGCCCTTACGTAAGGACTATATAACCCCAATTTCTATGAAATACAAGATGCTCAT  
TGA-----

-----ATGGTCTTA---ACTGAATATTCA---GAAAAAAAAAAAAA---  
GAAGGAAA---GATTCCATTGGGACAATTATGAGTTTGATT---  
GAGTTTCCGTTACTCGACCAACAAGTTCCAATTCCGTTATTTCA-----  
ACTACACCAACGATCTTTCAAATTTGGTCAAGACTCTCAAGTTTATGGCCCTTCTATATGGTACCAGTTGTTGTTTCAT



TGAATTTGCTTCATTAATAGGCTCACGATTGACTTTGATCGTTATGGATTGGTACCCAGATCAAGTCTAGACAAGCGG  
ACCTAATTTTAAACAGCTGGTACGGTAACAATGAAAATGGCTCCATCTTTAGTGCATTATATGAGCAAATGCCTGAACCG  
AAATACGTCATTGCTATGGGAGCCTGTACTATTACAGGGGGCATGTTTCAGTACAGATTCCCTATAGTACT---  
GTTTCGAGGAGTTGATAAGTTAATTCCTGTGGACGTCTACCTGCCGGGTTGCCCGCCTAAACCAGAGGCTGTTATAGATGC  
CCTAACAAAACCTTCGTAAGAAGATAGCGCGAGAAATAATTGAGGAT---CGAACTCTATGT-----  
CAAAGTCAAAGAAAAATAGATCTTTTACT-----ACCCGTCACAAAACCTTTATGTT-----  
CGGCGCAGTACTCACACTGGAACCTACGAACAAGAATTGCTCTATCAA-----  
-----TCACCATCT-----ACTTTAGATATA---TCTTCT-----  
--GAAACT-----TTTTTCAAATCCAAA---AGTTCAGTATCTTCC-----TACAAATTAGTGAATTAG-----  
-----ATGGAA---  
AATAGAAAAACCTTTTTCTTGGTTAAAGGAACAGATGATTCGATCG-----  
ATTTCTGTATCGATCATG-----ATATACGTAATA---  
ACTCGCACATCTATTTCAAACGCATATCCATTTTTGCGCAGCAGGGTTATGAAAACCCGCGGGAAGCAACTGGACGAAT  
TGTATGTGCCAATTGCCATTTAGCTAATAAGCCTGTGGATATTGAAGTTCCCAAGCAGTGCTTCCCTGATACTGTATTTG  
AAGCAGTTCTTCGAATTCCTTATGATATGCAGCTGAAACAAGTTCTTGCTAATGGTAAAAAGGGAGGGTTGAATGTGGGT  
GCTGTTCTTATTTGCCCGAGGGATTGCAATTAGCGCCGCC---  
GACCGTATTTCTCCTGAGTTGAAAGAAAAGATAGGA---AATCTCTCT---TTTCAGAGT---  
TATCGTCCCAATAAAAAAATATTCTTGTGATAGGCCCTGTTCCCGGTAAGAAATATAGTGAATTTGCTTTCCCATCTT  
TTCC

Acorus

CCGACCCTGCTACAAAGAAAGATGTTCACTTCTTAAAATATCCCATATATGTGGGCGGGAACAGGGGAAGGGGTGAGATT  
TATCCCGATGGGAGCAAGAGTAACAATACAGTCTATAATGCTACAGCCGCTGGTGTGGTAAGCAGAATCCTACGTAAGGA  
A---  
AAGGGGGTTATGAAATAACCATAGCTGATGCATCGGATGGACATCAAGTGGTTGATATTATACCTCCAGGACCAGA  
TCTTGTTCGGAGGGTGAATCCATTAAGCTTGATCAACCATTAACGAGTAATCCCAATGTGGGCGGATTCGGGCAGGGCG  
ATGCAGAAATAGTACTTCAAGATCCATTACGCGTCCAAGGTCTTTTGTCTTCTTGGCATCTGTTATTTTGGCACA  
TTTTTGGTTCTT---AAAAAGAAACAGTTTGAAGGTTCAATTGTACGAAATG---AATTTT-----  
AAAGTATATGATTTGGTTCGAGGAACGCTTCGAGATTCAGGCGATTGCAGATGATATAACTAGTAAATATGTTTCTCCTCA  
TGTCAACATATTTTATTGTCTAGGAGGGATCACACTTACTTGTTTTTTTAGTACAAGTAGCTACGGGCTTTGCTATGACTT  
TTTACTATCGTCCAACCTGTTACAGATGCTTTTGCATCTGTTCAATATATAATGACTGAGGTCAACTTTGGTTGGTTAATA  
CGATCAGTTCATCGATGGTCAGCAAGTATGATGGTACTAATGATGATCCTGCACGATTTTCGTGTGATCTTACAGGTGG  
ATTTAAAAAACCCCGTGAATTGACTTGGGTTACAGGTGTGGTCTGGGTGATTGACTGCATCTTTTGGTGTAACTGGTT  
ATTCTTTACCTTGGGACCAAATCGGTTATTGGGCAGTAAAAATTGTTACAGGCGTACCTGACGCTATTCTGTAATAGGA  
TCTCCTTTGGTAGAGTTATTACGTGGAAGTGCTAGTGTGGTCAATCCACTTTGACTCGTTTTTATAGTTTACACACTTT  
TGTCTTACCTCTTCTTACTGCCGATTTTATGTTAATGCACTTCCCAATGATACGTAAGCAAGGGATTTTCAGGTCTTTA-  
-----  
AACAAAGAAACCTGACTTGAATGATCCTGTATTAAGAGCTAAGTTGGCTAAAGGGATGGGACATAATTATTATGGAGA  
CCGCGTGGCCCAACGACCTTTTATATATCTTTCCAGTAGTAATTTTAGGTACTATTGCGTGTAAATGTGGCCTGGCGATT  
CTAGAACCATCAATGATTGGTGAACCCGCGGATCCATTTGCAACTCCTTTGGAAATATTACCCGAATGGTACTTTTTTCC  
CGTATTTCAAATACTCCGTACAGTTCCTAATAAGTTACTGGGTGTTCTTTTAAATGGCTTCAGTACCGCTGGGATTATTTA  
CAGTACCCTTTTTGGAGAATGTTAATAAATCCAAAATCCCTTTGCTCGTCCAGTAGCTACAACAGTCTTTTTGATCGGT  
ACTGCAGTAGCCCTTTGGTTAGGTATTGGAGCCACATTACCTATTGATAAATCCCTAACTTTAGGTCTTTTT-----  
-----  
ATGATTGAAGTTTTTCTATTTGGAATCGTATTAGGTCTAATTCCTATTACTTTGGCAGGATTGTTTCGTAACCTGCATATTT  
ACAATACAGACGCGGTGATCAGTTGGACCTT-----  
ATGCCTACTATAACT-----  
AGTTATTTTCGGTTTTTCTACTGGCTGCTTCAACTATAACCACAGCTCTATTTCATTGGTCTGAGCAAGATA-----  
CGGCTAATT-----  
-----  
ATGGATATTGTAAGTCTTGCTTGGGCTGCTTTAATGGTAGTCTTTACATTTTCCCTTTCACTCGTAGTATGGGGAAGAAG  
TGGACTC---ATGATTATTCGTTCCGCCGAACCA-----GAAGTGAAA-----  
ATTGTGGTAGATAGGGATCCATAAAAACCTTCTTTGAGGCATGGGCCAGACCCGGCCATTTTTCAAGAACAATAGCTAA  
AGGCCCTGATACTACCACTTGGATCTGGAACCTACATGCTGATGCTCACGATTTTCGATAGCCATAACCAGTGATTTGGAGG  
AGATTTCTCGAAAAGTATTTAGTGTCTATTTCCGGTCAACTCTCCATCATCTTTCTTTGGCTGAGTGGCATGTACTTCCAT  
GGCGCCCGTTTTTCTAATTATGAAGCATGGCTGAGTGATCTACTCACATTAGACCCAGTGCCAGGTAGTTTGGCCAAT  
AGTGGGTCAAGAAATTTGAATGGTGTGTTGGGCGGGGTTCCGCGGAATACAATAACCTCTGTTTTTTTTCAAATTT

GGCGAGCATCTGGAATAACTAGTGAATTACAACCTTTATTGTACCGCAATTGGCGCGTTGGTCTTTGCAGCGTTAATGCTT  
TTTGCAGGTTGGTTCCATTATCACAAAGCTGCTCCAAAATTGGCTTGGTTCCAAGATGTCGAATCTATGTTGAATCACCA  
CTTAGCGGGGTTACTAGGACTGGGGTCTCTTTCTTGGGCGGGACACCAAATACATGTATCTTTGCCGATTAACCAATTC  
TCGACGCGGGAGTGGATCCTAAAGAGATACCACTTCCTCATGAATTTATATTGAATCGGGATCTTTTGGCTCAACTTTAT  
CCAAGTTTTGCGGAAGGAGCAACTCCATTTTTACCTTGAATTGGTCAAAAATATGCAGAATTTCTTACTTTTCGGGGAGG  
ATTAGATCCTATAACAGGCGGCCTATGGTTGAGCGATATTGCGCACCATCATTTAGCTATTGCAATTTCTTTTCTGATAG  
CTGGTCATATGTATAGAACCAACTGGGGCATTGGTCATGGACTAAAAGATATTTTGGAGGCTCATAAGGGTCCATTTACG  
GGCCAAGGTCATAAAGGCCTTTATGAAATCCTAACCACGTCATGGCATGCTCAATTAGCTCTTAACCTGGCTATGTTAGG  
CTCTTTAACCATTGTTGTAGCTCACCATATGTATCCATGCCCCCTATCCATACTAGCTACTGACTATGGTACACAAC  
TTTCGTTGTTACACATCACATGTGGATCGGTGGATTTCTCATAGTTGGTGTCTGCTGCACATGCAGCCATTTTTATGGTA  
AGAGACTACGATCCAACTACTCGATAACAACGATCTATTAGATCGTGTCTTAGGCACCGTGTATGCAATCATATCACATCT  
AAACTGGGCATGTATATTTCTAGGCTTTCCAGTTTTGGTTTGTATATTATAATGATACCATGAGTGCCTTAGGGCGCC  
CCCAGGATATGTTTTAGATACCGCTATAACAATTACAACCC---

ATCTTTGCTCAATGGGTACAAAACACCCATGCTTTAGCACCTGTTGCGACAGCTCCTGGTGCAACAACAGGCACCAGCTT  
AGCTTGGGGGGTGGTGAGTTAGTAGCAGTAGGCGGCAAAGTAGCTTTGTTACCTATTCCATTAGGAACTGCGGATTTCT  
TGGTACATCACATTTCATGCATTTACGATCCATGTGACTGTATTGATACTACTGAAAGGTGTTCTGTTTGGCTCGGAGCTCC  
CGTTTAATACCTGATAAAGCGAATCTTGGCTTTTCGTTTCCCTTGTGATGGTCTGGAAGAGGAGGAACATGTCAAGTATC  
CGCCTGGGATCATGTCTTCTTAGGTCTATTCTGGATGTACAATTCAATTTCCGTAGTCATATTTCCATTTTCAGTTGGAAAA  
TGCAATCGGATGTTTGGGGTAGTATAAGCGATCAAGGGGTGGTAACCTCATATCACAGGAGGAACTTTGCACAGAGTTCC  
ATTACTATTAATGGGTGGCTTCGGGATTTCTTATGGGCACAGGCATCTCAGGTAATTCAGTCTTATGTTTCTTCATTATC  
TGCATATGGTCTTTTTTCTAGGTGCTCATTGTTGATGGGCTTTTCAGTTTAAATGTTTCTATTCT---

AGCGGCCGTGGTTATTGGCAAGAAGTTATTGAATCCATCGTTTGGGCTCATAACAAATTAAGGTTGCTCCTGCTACTCA  
GCCTAGAGCCTTGAGCATTGTACAAGGACGTGCTGTAGGAGTAACCTATTACCTTCTGGGTGGAATTGCCACAACATGGG  
CATTCTTCTTAGCAAGAATTATTGCAGTAGGA---

ATGGCATTAAAGATTTCCAAGGTTTAGCCAAGGCTTAGCTCAGGACCCCACTACTCGTCGTATTTGGTTTGGTATTGCTAC  
CGCACATGACTTCGAGAGTCATGATGATATTACTGAGGAACGTCTTTATCAGAACATTTTTGCTTCTCACTTTGGTTCAGT  
TAGCAATAATCTTCTGTGGACTTCCGGAAATCTGTTTCATGTAGCTTGGCAAGGAAATTTGAGTCATGGGTACAGGAC  
CCTTTACACGTAAGACCTATTGCTCACGCAATTTGGGATCCTCATTGTTGGTCAACCGGCTGTCAAGCCTTTACTCGAGG  
AGGTCTCCTGACCAAGTGAATATCGCTTATTTCCGGCGTTTATCAGTGGTGGTATAACAATCGGATTACGCACCAATGAAG  
ATCTTTTACTGGAGCTTTTTTCTATTATTTCTTTCTGCTATATCCTTAATAGGGGGTTGGTTACACCTACAACCCAAA  
TGAAACCAAGCGTTTCTTGGTTCAAAAATCGGGAATCCCGTCTGAATCATCATTTGTGAGGACTTTTCGGAGTAAGTTC  
CTTGGCTTGGACAGGGCATTTAGTTCAT

Amborella

CGGATCCCGCTACTAAGAAAGAAGTTCACTTCTTGAATATCCCATATATGTGGGTGGGAATAGAGGAAGGGGTGAGATT  
TATCCCGATGGGAGCAAGAGTAACAATACAGTTTATAATGCCTCAGCATCAGGGATAATAAGTAGAATAATACGTAAAGA  
A---

AAGGGTGGATATGAAATAACCATAGCTAATGCATTGGATGGGCGTCAAGTGGTTGATATTATACCTCCAGGACCGGAACT  
TCTTGTTCGGAAGGTGAATCTATCAAACCTTATCAACCATTAACGAGTAATCCCAATGTGGGTGGATTTGGTTCAGGGGG  
ATGCAGAAATAGTACTTCAAGATCCATTACGTATCCAAGGTCTTTTTCTTTTTTGGCATCTGTTATTCTGGCACAAATC  
TTTTTGGTTCTT---AAAAAGAAACAGTTTGGAGAAGGTTCAATTGGCTGAAATG---AATTTCT---

ATGAGTAAAGTATATGATTGGTTTCGAGGAGCGTCTCGAGATTACAGGCGATTGCGGATGATATAACTAGTAAATATGTTCC  
TCCTCATGTCAATATATTTTCAATTGTCTAGGGGGAATCACACTTACTTGTTTTTTAGTACAAGTAGCTACGGGTTTTGCTA  
TGACTTTTTACTATCGTCCAACCTGTTACAGAGGCTTTTGCCTCTGTTCAATATATAATGACTGAAGTAACTTTGGTTGG  
TTAATCCGATCAGTTCATCGATGGTTCGGCAAGTATGATGGTTCTAATGATGATCCTGCACGTATTTTCGTGTTTATCTCAC  
AGGCGGATTTAAGAAACCTCGCGAATTAACCTGGGTTACGGGTGTGGTTCTGGCTGTATTGACTGCATCTTTTGGTGTAA  
CTGGTTATTCTTACCTCGGGACCAATTTGGTTATTGGGCAGTCAAAATCGTGACCGGCGTGCCTGAGGCTATCCCTATA  
ATAGGATCGCCCTTGGTAGAGTTATTACGTGGAAGTGTAGTGTGGGCCAATCTACCTTGACCCGTTTTTATAGTTTTACA  
CACTTTTGTATTACCTCTTCTTACTGCCGATTTTATGTTAATGCATTTTCCAATGATACGTAAGCAAGGTATTTTCGGGTC  
CTTTA---

ATGGGAGTAACAAAGAAACCTGACTTGAATGATCCTGTATTAAGAGCTAAATTGGCTAAAGGGATGGGACATAATTATTA  
CGGAGAACCCGCATGGCCTAATGATCTTTTATATATCTTTCCAGTAGTAATTTTAGGTACTATTGCATGTAACGTGGGTC  
TAGCTGTTCTAGAACCTTCAATGATTGGTGAACCAGCAGATCCATTTGCAACTCCTTTGGAAATATTACCCGAATGGTAC  
TTTTTTCCCGTATTTCAAATACTTTCGTACAGTACCTAATAAGTTATTGGGTGTCTTTTAAATGGTTTTCGGTACCAACGGG  
ATTATTGACAGTACCTTTTTTGGAGAATGTTAATAAAATCCAAAATCCATTTGCGCGTCCAGTAGCTACAACAGTCTTTT  
TGTTCCGTACCGCACTAAGTCTTTGGTTAGGTATTGGAGCAACATTACCTATTGATAAATCCCTAACTTTAGGTCTTTTT

-----  
ATGATTGAAGTTTTTCCATTTGGAATCGTGTAGGTCTAATTCCTATTACTTTGGCCGATTTATTGTAACGTGCATATTT

ACAATACAGACGCGGGGATCAGTTGGATCTT-----  
ATGCCTACTATAACT-----  
AGTTATTCCGGTTTTCTACTGGCTGCTTCAACTATAACCTCAGCTTTATTGATTGGCCTGAACAAGATA-----  
CGACTTATT-----

ATGGATATAGTAAGTCTCGCTTGGGCTGCTTTAATGGTAGTTTTTACATTTTCCCTTTCACTAGTAGTATGGGGAAGAAG  
TGGACTC---ATGATTATTCGTTCCGCCGAATCA-----GAAGTGAAG-----  
ATTATGGTGGATAGGGATCCCATAAAACTTCTTTTCGAGGAATGGGCCAGACCCGGCCATTTCTCAAGGACAATAGCTAA  
AGGCCCAATACTACCACTTGGATCTGGAACCTACATGCTGATGCTCACGATTTTCGATAGCCATAACAGTGATTTGGAGG  
AAATCTCTCGAAAAGTATTTAGTGCTCATTTCGGTCAACTATCCATCATCTTTCTTTGGTTGAGTGGTATGTACTTCCAT  
GGTGCCCGTTTTTCCAATTAAGAAGCATGGTTGAGCGATCCTACTCACATCGCACCCAGTCCCAGGTGGTTTGGCCAAT  
AGTTGGTCAAGAAATCCTGAATGGCGATGTAGGTGGAGGTTTCCGAGGAATACAAATAACCTCTGGTTTTTTTTCAGATTT  
GGCGAGCATCTGGAATAACTAGTGAATTACAACCTATTGTACCGCAATTGGTGCTTTGGTCTTTGCAGCGTTAATGCTT  
TTTGCCGGTTGGTTCCATTATCACAAGGCTGCTCCAAAATTGGCTTGGTTCCAAGATGTAGAATCCATGTTGAACCACCA  
CTTAGCAGGGTTACTAGGACTTGGGTCTCTTTCTTGGGCGGGACACCAAGTACATGTATCTTTACCCATTAACCAATTTT  
TAGACGCGGGAGTGGATCCTAAAGAGATACCACTTCTCATGAATTTATCTTGAATCGGGATCTTTTGGCTCAACTTTAT  
CCCAGTTTTGCGGAGGGATCAACCCCATTTTTTACCTTGAATTGGTCAAAAATACGCGGAATTTCTTACTTTTTCGCGGAGG  
ATTAGATCCAGTAACAGGGGTCTATGGCTGACCGATATTGCACACCATCATTGGCTATTGCAATATTTTTCTGATAG  
CTGGTCACATGTATAGGACCAACTGGGGAATTGGTCATGGCCTAAAAGAGATTTTAGAGGCTCATAAAGGTCCATTTACA  
GGCGAGGGTCATAAAGGTCTCTATGAGATCCTAACAACGTATGGCATGCTCAATTAGCTCTTAACCTAGCTATGTTAGG  
CTCTTTAACCATTGTTGTAGCTCACCATATGTATTCTATGCCCCCTATCCATACCTAGCTATTGACTATGGTACACAAC  
TCTCGTTGTTACACATCACATGTGGATCGGTGGATTTCTCATAGTTGGCGCTGCTGCACATGCAGCTATTTTTATGGTA  
AGAGACTATGACCCAACCTACTCGATACAACGACCTTTTAGATCGTGTCTTAGGCACCGTGATGCAATCATATCACACCT  
CAACTGGGCATGTATATTTCTAGGCTTTCATAGTTTTGGCCTGTATATTCATAATGATACCATGAGCGCTTTGGGGCGTC  
CTCAAGATATGTTTTAGATACCGCTATAACAATTACAACC---

ATCTTTGCTCAATGGATACAAAACACTCATGCTTTAGCACCTGGTGCAACAGCTCCTGGTGCAACAACAAGTACCAGTTT  
GACTTGGGGAGGTGGTGAATTTAGTAGCAGTAGGTGGAAAAGTAGCTTTGTTACCTATTCCACTAGGAACCGCAGATTTTT  
TGGTACACCACATTCATGCATTTACGATCCATGTGACCCGATTTGATACTACTGAAAGCGTTCTATTTGCTCGTAGTCC  
CGTTTGTATACCTGATAAAGCAAATCTGGGTTTTCGTTTTCCCTTTGTGACGGACCCGGAAGAGGGGAAACATGTCAAGTATC  
CGCCTGGGATCATGTCTTCTTAGGTCTATTCTGGATGTACAATGCGATTTTCGGTAGTAATATTCCATTTTCAAGTTGAAAA  
TGCAGTCGGATGTTTTGGGGTAGTATAAGCAATCAAGGGGTGGTAACTCATATCACGGGAGGAAACTTTGCGCAGAGTTCC  
ATTACTATTAACGGATGGCTCCGGGATTTTCTATGGGCACAGGCCTCTCAGGTGATCCAGTCTTATGGTTCTTTCATTATC  
CGCATATGGCCTGTTTTTCTAGGTGCTCATTGTTTGGGCCTTCAGTTTAAATGTTTCTATTC---

AGCGGCCGCGGTTATTGGCAAGAACTTATTGAATCCATCGTTTTGGGCTCATAACAAATTAAGGTTGCTCCTGCTACTCA  
GCCTAGAGCCTTGAGCATTGTCCAAGGACGTGCTGTAGGAGTAACCCATTACCTTCTGGGTGGAATTGCCACAACATGGG  
CATTCTTCTTAGCAAGAATTATTGCAGTAGGA---

ATGGCATTAAAGATTTCCAAGGTTTAGCCAAGGCTTAGCTCAGGACCCCACTACTCGTCGATTTGGTTTTGGTATTGCCAC  
CGCACATGACTTCGAGAGTCATGATGATATCACTGAGGAAGGTCTTTATCAGAATATTTTTGCTTCTCACTTCGGGCAGT  
TAGCAATAATCTTCTGTGGACTTCCGGGAATCTGTTTCATGTGGCTTGGCAAGGAAATTTTGGAGTCATGGGTACAGGAC  
CCTTTACATGTAAGACCTATTGCTCATGCAATTTGGGATCCTCATTGTTGGTCAACCAGCTGTAGAAGCCTTTACTCGAGG  
GGGTGCTCTCGGTCCGGTGAATATCGCTTATTCCGGTCTCTATCAGTGGTGGTATAACAATCGGCTTGGCGACCAATGAAG  
ATCTTTATACTGGAGCTCTTTTTCTATTATTTCTTTCTGCGATATCTTTAATAGCGGGTTGGTTACATCTACAACCCAAA  
TGGAAGCCAAGCGTTTCGTGGTTCAAAAATGCTGAATCTCGTCTTAATCATCATTGTCAGGACTGTTCCGGAGTAAGTTC  
CTTGGCTTGGACAGGACATTTAGTTTCAT

Arabidopsis

CAGACCCTGCTACTAATAAAGATGTTCACTTCTTAAAATATCCTATATATGTAGGTGGAAACAGGGGAAGGGGTGAGATT  
TATCCTGATGGTAGCAAAAGTAACAATACAGTTTATAATGCTACGGCAGGAGGGATAATAAGTAAAATTTTACGAAAAGA  
A---

AAGGGGGGATACGAAATAACCATAGTGGATGCATCGAATGGACGCGAAGTTATTGATATTATCCCTCGAGGCCTAGA  
ACTTCTGTTTTCAGAGGGCGAATCCATTAAACTCGATCAACCATTAACGAGTAATCCTAATGTGGGTGGATTTGGTTCAGGGGG  
ATGCGGAAATAGTACTTCAAGATCCATTACGTGTCCAAGGTCTTTTGTCTTCTTAGGATCGGTTGTTTTGGCACA  
AATCTTTTTGGTTCTT---AAAAAGAAACAGTTTGAAGAAGTTCAATTATCCGAAATG---AATTTT---

ATGAGTAAAGTTTATGATTGGTTCGAAGAACGTCTTGAGATTGAGGCGATTGCAGATGATATAACTAGTAAATATGTTCC  
TCCGCATGTCAACATATTTTATTGTCTAGGCGGAATTACCCTTACTTGTTTTTTAGTACAAGTAGCTACGGGATTTGCTA  
TGACTTTTTATTACCGTCCAACCGTTACTGAAGCTTTTGCTTCTGTTCAATATATAATGACTGAAGCTAACTTTGGTTGG  
TTAATCCGATCAGTTTCATCGATGGTCCGCAAGTATGATGGTCTAATGATGATCCTGCACGATTTTCGTGTATACCTCAC  
CGGTGGTTTTAAAAACCTCGCGAATTAACCTGGGTTACTGGTGTGGTTCTGGGTGATTGACCGCATCTTTTGGTGTAA

CAGGTTATTCTTTACCTTGGGATCAAATTGGTTATTGGGCGGTCAAATTTGTAACAGGTGTACCTGACGCTATTCCGGTA  
ATAGGATCACCTCTTGTAGAATTATTACGCGGAAGTGCTAGTGTGGACAATCCACTTTGACTCGTTTTTATAGTTTTACA  
CACTTTTGTATTACCTCTTCTTACGGCCGTCTTTATGTTAATGCATTTCCCTAATGATACGTAAGCAAGGTATTTCTGGTC  
CCTTA---

ATGGGAGTAACAAAAAACCAGATTTGAATGATCCTGTATTACGAGCTAAATTAGCTAAAGGTATGGGTACACAATTATTA  
CGGGGAACCCGCATGGCCCAACGACCTTTTATATATTTTTCCAGTAGTTATTCTTGGTACCATTGCCTGTAACGTAGGCT  
TAGCGGTTTTAGAACCATCAATGATTGGTGAACCTGCGGATCCTTTTGCAACTCCTTTGGAAATATTACCTGAATGGTAT  
TTCTTTCCTGTATTTCAAATACTTCGTACAGTGCCTAACAAATTATTGGGTGTTCTTTTAATGGTTTTAGTACCAGCGGG  
ATTATTAACCGTACCCTTTTGGAAAATGTTAATAAGTTTCAAATCCATTTGTCGTCAGTACGACAACCGTCTTTT  
TGATTGGCACCGCGGCGGCCCTGTGGTTAGGTATTGGAGCAACATTACCGATTGATAAATCTCTAACTTTAGGTCTTTTT

ATGATTGAAGTTTTTTTTATTTGGAATCGTCTTAGGTCTAATTCCTATTACTTTGGCTGGATTATTCGTAACCTGCTTATTT  
ACAATACAGACGTGGTGATCAGTTGGACTTT-----

ATGCCTACTATAACT-----

AGTTATTTTCGGTTTTCTACTAGCAGCTTTAACTATAACCTCAGTTCTGTTTTATTGGTCTAAGCAAAATA-----  
CGACTTATT-----

ATGGATATAGTAAGTCTCGCATGGGCTGCTTTAATGGTAGTTTTTACATTTTCCCTCTCTCTCGTAGTGTGGGGAAGAAG  
TGGACTC---ATGATTATTCGTTTCGCCGAACCA-----GAAGTCAA-----

ATTTTGGTAGATAGGGATCCATAAAAACCTCTTTTCGAGGAATGGGCTAAACCCGGTCATTTCTCAAGAACAATAGCTAA  
GGGACCTGATACTACCCTTGGATCTGGAACCTACATGCTGATGCTCACGATTTTGATAGTCATACCAGTGATTTGGAGG  
AAATCTCTCGAAAAGTATTTAGTGCCCATTTTCGGCCAACCTCTATCATCTTTCTTTGGCTGAGTGGCATGTATTTCCAT  
GGTGCTCGTTTTTCCAATTATGAAGCATGGCTGAGTGATCCTACTCACATTGGACCTAGTGCTCAGGTGGTTTTGGCCAAT  
AGTGGGCCAAGAAATCCTGAATGGAGATGTGGGCGGAGGCTTCCGAGGAATACAAATAACCTCAGGCTTTTTTTCAGATTT  
GGCGAGCATCCGGAATAACTAGTGAATTACAACCTTTATTGTACCGCAATTGGCGCATTGGTCTTCGCAGCCTTAATGCTT  
TTTGCTGGTTGGTTCCATTATCACAAAGCAGCTCCAAAATTGGCTTGGTTCCAAGATGTAGAATCTATGTTGAATCACCA  
TTTAGCAGGGCTACTAGGACTTGGGTCCCTTTCTTGGGCAGGACATCAAGTACATGTATCTTTACCGATTAACCAATTTT  
TAAACGCTGGAGTAGATCTCAAAGAAATACCGCTTCCCTCATGAATTTATCTTGAATCGGGATCTTTTGGCTCAACTTTAT  
CCAAGTTTTGCTGAAGGAGCAACTCCCTTTTTTACCTTAAATTGGTCAAATACTCGGAATTTCTTACTTTTTCGTGGCGG  
ATTAGATCCAGTGACTGGGGTCTATGGTTAACCAGATATAGCACATCATATTTAGCTATCGCAATTTCTTTTCTAATCG  
CGGGTCATATGTATAGGACCAACTGGGGTATTGGTCATGGTATAAAAAGATATTTTAGAGGCTCATAAAGGTCCATTTACA  
GGCCAAGGCCATAAAGGCCTATATGAAATTCTAACAACATCATGGCATGCTCAATTATCTCTTAACTAGCTATGTTAGG  
CTCTTTAACCATTATTGTAGCTCACCATATGTATTCCATGCCCCCTTATCCATATCTAGCTACTGACTATGCTACACAAC  
TGTCATTGTTTACACATCACATGTGGATTGGTGGATTTCTCATAGTTGGTGCTGCTGCGCATGCAGCCATTTTTATGGTA  
AGAGACTATGATCCAATAATCGATATAACGATTTATTAGATCGTGTCTGAGGCATCGCGATGCAATCATATCACATCT  
CAACTGGGTATGTATATTTCTAGGCTTCCACAGTTTTGGTTTTGTATATTCATAATGATACCATGAGTGCTTTAGGGCGTC  
CACAAGATATGTTTTAGATACTGCTATAACAATTACAACCA---

GTCTTTGCTCAATGGATACAAAATACCCATGCTTTAGCACCTGGTGTAAACAGCCCCTGGTGAACAGCGAGCACCAGTTT  
GACTTGGGGGGCGGTGAGTTAGTAGCAGTGGGTGGCAAAGTAGCTTTGTTACCTATTCCATTAGGAACGGCAGATTTTT  
TGGTACATCATATTCATGCATTTACAATTCATGTGACGGTATTGATACTGTTGAAAGGTGTTCTATTTGCTCGTAGCTCG  
CGTTTTAATACCAGATAAAGCAAATCTTGGTTTTCGTTTTCCCTTGTGATGGGCCGGGAAGAGGAGGAACATGTCAAGTATC  
TGCTTGGGATCATGTCTTCTTAGGACTATTCTGGATGTACAATGCTATTTCCGTAGTAATATTTCCATTTTCAGTTGGAAAA  
TGCAGTCAGATGTTTGGGGTAGTATAAGTGATCAAGGGGTGGTAACTCATATTACTGGAGGAACTTTGCACAGAGTTCC  
ATTACTATTAATGGGTGGCTCCGCGATTTCTTATGGGCACAAGCATCTCAGGTAATTCAGTCTTATGGTTCTTCGTTATC  
TGCATATGGTCTTTTTTTCCTAGGTGCTCATTTTGTATGGGCTTTTCAGTTTTAATGTTTCTATTC---

AGCGGGCGTGGTTATTGGCAAGAACCTTATTGAATCCATTGTTTGGGCTCATAATAAATTTAAAGTTGCTCCTGCTACTCA  
GCCTAGAGCCTTGAGCATTATACAAGGACGTGCTGTAGGAGTAACCCATTACCTTCTGGGTGGAATTGCCACAACATGGG  
CGTTCTTCTTAGCAAGAATTATTGCAGTAGGA---

ATGGCATTAAAGATTTCCAAGGTTTAGCCAAGGCTTAGCTCAGGACCCCACTACTCGTCGATTTGGTTTTGGTATTGCTAC  
CGCACATGACTTCGAGAGTCATGATGATATTACTGAAGAACGTCTTTATCAGAATATTTTTGCTTCTCATTTTCGGGCAAT  
TAGCAATAATTTTTCTGTGGACTTCCGGAAATTTGTTTTCATGTAGCTTGGCAAGGAAATTTTGGAGACATGGGTACAAGAC  
CCTTTACATGTAAGACCGATTGCTCATGCTATTTGGGATCCTCATTTTGGTCAACCGGCTGTGGAAGCGTTTACTCGAGG  
AGGTGCTCTTGGCCCGGTGAATATAGCTTATTCTGGTGTATATCAGTGGTGGTATAACAATCGGTTTACGTACTAATGAAG  
ATCTTTTACTGGAGCTCTTTTTCTATTATTTCTTTCTGCCCTATCCTTAAATAGGGGGTTGGTTACACCTACAACCAAAA  
TGGAAACCAAGAGTTTCGTGGTTCAAATGCTGAATCTCGTCTGAATCATCATTTGTCAGGACTATTCCGGGTAAGCTC  
ATTGGCTTGGACAGGTCAATTTAGTCCAT

Atropa

CGGACCCTGCTACTAAGAAGGATGTTCACTTCTTAAAATATCCTATATACGTAGGCGGGAACAGGGGAAGGGGTCAGATT  
TATCCCGACGGCAGCAAGAGTAACAATACAGTTTATAATGCTACAGCAGCAGGTATAGTAAGCAAATCATACGAAAAGA  
A---

AAAGGGGGATATGAGATAACCATAACGGATGCGTTCGGAGGGACGGCAAGTGGTTGATATTATCCCTCCCGGACCAGA  
TCTTGTTCGAGGGCGAATCTATCAAATTTGATCAACCATTAACGAGTAATCCTAATGTAGGCGGATTTGGTCAGGGAG  
ATGCAGAAATAGTACTTCAAGATCCATTACGTGTCCAAGGACTTTTGTCTTCTTGGCATCTGTTATTTGGCACAATC  
TTTTTGGTTCTT---AAAAAGAAACAGTTCGAGAAGGTTCAATTGGCCGAAATG---AATTTCT---

ATGAGTAAAGTATATGATTGGTTTCGAAGAACGTCTCGAGATTCAAGCAATTGCGGATGATATAACTAGTAAATATGTTCC  
TCCCCACGTCAATATATTTTATTGTTTAGGGGGAATTACGCTTACTTGTTTTTTAGTACAAGTAGCTACTGGGTTTGCTA  
TGACTTTTTACTATCGTCCGACCCTTACTGAGGCTTTTGGCTTCTGTTCAATACATAATGACTGAAGCCAACCTTTGGTTGG  
TTAATCCGATCAGTTTATCGATGGTTCGGCAAGTATGATGGTCTAATGATGATCCTGCATGATTTTCGTGTGTATCTCAC  
CGGCGGATTTAAAAAACCTCGCAATTGACTTGGGTTACCGGTGTGGTTCTGGCTGTATTAACCGCATCTTTTGGCGTAA  
CTGGTTATTCTTACCTTGGGACCAAATTGGTTATTGGGCAGTGAAAATAGTAACAGGTGTCCCTGACGCTATTCTGTGA  
ATAGGATCACCTTTGGTTCGAATTATTGCGCGGAAGCGCTAGTGTGGGACAATCTACTTTGACTCGTTTTTATAGTTTACA  
CACTTTTGTATTGCCGCTTCTTACTGCCGTATTTATGTTAATGCACCTTTCCAATGATACGTAACAAGGTATTTCTGGGC  
CTTTA---

ATGGGAGTAACAAAAAACCTGACTTGAATGATCCTGTATTAAGAGCTAAATTGGCTAAAGGTATGGGTCATAATTATTA  
TGGAGAGCCCGCATGGCCTAATGATCTTTTATATATTTTTCCAGTAGTAATTCTAGGTAATGTAATGTAGGCT  
TAGCCGTTTTAGAACCATCAATGATTGGTGAACCGGCAGATCCGTTTGAACCCCTTTGGAAATATTACCTGAATGGTAT  
TTCTTTCTGTATTTCAAATACTTTCGTACAGTGCCCAATAAATTATTAGGGGTTCTTTTAAATGGTTTCAGTACCTGCGGG  
ATTATTAACAGTACCTTTTTTGGAGAATGTTAATAAATTCAAAATCCATTTCCCGTCCAGTAGCGACGACTGTCTTTT  
TGATTGGTACCGCAGTCGCCCTTTGGTTGGGCATTGGTGCAACATTACCTATTGATAAATCCCTAACTTTAGGTCTTTTT

-----  
ATGATTGAAGTTTTTCTATTTGGAATCGTGTAGGTCTAATTCCTATTACTTTGGCTGGATTATTCGTAAGTGCATATTT  
ACAATATAGGCGTGGTGATCAGTTGGACCTT-----

ATGCTTACTATAACT-----

AGTTATTTCCGTTTTCTATTAGCGGCTTTAACTATAACCTCAGCTCTATTTATTGGTCTGAGCAAGATA-----

CGACTTATT-----

-----  
ATGGATATAGTAAGTCTTGGCTTGGGCTGCTTTAATGGTAGTCTTTACTTTTTCCCTTTCACTCGTAGTGTGGGGAAGGAG  
TGGACTC---ATGATTATTCGTTTCGCCGGAACCA-----GAAGTTAAA-----

ATTTTGGTAGATAGGGATCCCGTAAAACGTCTTTTCGAGGAATGGGCCAGACCGGGTCATTTCTCAAGAACAATAGCTAA  
AGGGCCTGATACTACCCTTGGATTTGGAACCTACATGCTGATGCTCACGATTTTCGATAGCCATAACCAGTGATTTGGAGG  
AGATCTCTCGAAAAGTATTTAGTGCACATTTTCGGTCAACTCTCCATCATCTTTCTTTGGCTGAGCGGCATGTATTTCCAC  
GGTGCTCGTTTTTCTAATTATGAAGCGTGGCTAAGTGTCCAACCTCACATTGGGCCTAGTGCCAGGTGGTTTGGCCAAT  
AGTGGGCCAAGAAATATTAATGGTGACGTACGCGGAGGTTCCGAGGAATACAAATAACCTCTGGTTTTTTTTTCAGATTT  
GGCGAGCATCTGGAATAACTAGTGAATTACAACCTCTATTGTACAGCAATTGGGGCATTGGTCTTTGCAGCGTTAATGCTT  
TTTGCTGGTTGGTTTTCATTATCATAAAGCGGCGCCAAAATTGGCTTGGTTTCAAGATGTAGAATCTATGCTGAATCACCA  
TTTGGCAGGGCTACTAGGGCTTGGGTCTCTCTTTGGGCGGGGCATCAAGTACATGTATCTTTACCGATTAACCAATTTT  
TAAACGCTGGAGTAGATCCTAAAGAGATACCCTTCTCATGAATATATCTTGAATCGAGATCTTTTGGCTCAACTTTAT  
CCCAGTTTTGCGGAGGGAGCAACCCCATTTTTTACCTTGAATTGGTCAAAAATATGCGGACTTTCTTACTTTTTCGTGGAGG  
ATTAGATCCAGTAACTGGGGTCTGTGGCTAACTGATATTGCCCATCACCATTTAGCTATTGCAATTTCTTTTCTGATAG  
CGGGTCACATGTATAGGACCAACTGGGGTATTGGTCATGGACTAAAAGATATTTTAGAAGCTCATAAAGGTCCATTTACA  
GGTCAGGGCCATAAAGGCCTATATGAGATCCTAACAACGTATGGCATGCTCAATTATCTCTTAACTTAGCTATGTTAGG  
CTCTTTAACCATTGTTGTAGCTCATCATATGTATTCCATGCCCCCTTATCCGTATCTAGCTACTGACTATGGTACACAAC  
TGTCAATGTTTACACATCACATGTGGATTGGTGGATTTCTCATAGTTGGTGCTGCCGCGCATGCAGCCATTTTTTATGGTA  
AGAGATTATGATCCAACCTACTCGGTACAACGATCTATTAGATCGTGTCTTAGGCATCGTGATGCAATCATATCCCATCT  
CAACTGGGCATGTATATTTCTAGGCTTTTACAGTTTTGGTTTGTATATTATAATGATACCATGAGCGCTTTAGGGCGTC  
CTCAAGATATGTTTTAGATACCGCTATAACAATTACAACCC---

GTTTTTGGCTCAATGGATACAAAACACCCATGCTTTAGCACCTGGTGCAACGGCTCCTGGTGCAACAGCAAGCACCAGTTT  
AACTTGGGGGGTGGTGATTTAGTGGCAGTGGGTGGCAAGGTGGCTTTGTTGCCTATTCCATTAGGAACCGCCGATTTCT  
TGGTACATCACATTCATGCATTTACGATTCATGTGACGGTATTGATACTCTTGAAGGTGTTCTATTTGCTCGCAGTTCC  
CGTTTTGATACCGGATAAAGCAAATCTTGGTTTTCGTTTTCTTGTGATGGACCTGAAAGAGGGGTACATGTCAAGTATC  
GGCCTGGGATCATGTCTTCTTAGGACTATTCTGGATGTACAATGCAATTTCCGTAGTAATATTCCATTTTCAGTTGGAAAA  
TGCAGTCAGATGTTTTGGGCGAGTGAAGTGTCAAGGGGTAGTAACCTCATATCACGGGAGGAACTTTGCGCAGAGTTCT  
ATTACTATTAATGGGTGGCTCCGCGATTTCTTATGGGCACAGGCATCCCAGGTAATTCAGTCTTATGGTTCTTCATTATC

TGCATATGGCCTTTTTTCTAGGTGCTCATTGTTGTCTGGGCTTTTAGTTTAAATGTTTCTATTC---  
AGCGGACGTGGTTATTGGCAAGAAGCTTATTGAATCCATCGTTTTGGGCTCATAATAAATTTAAAGTTGCTCCTGCTACTCA  
GCCGAGAGCCTTGAGCATTATACAAGGACGTGCTGTAGGAGTAACCCATTACCTTCTGGGTGGAATTGCCACAACATGGG  
CATTCTTCTTAGCAAGAATTATTACAGTAGGA---  
ATGGCATTACGATTTCCAAGGTTTAGCCAAGGCTTAGCTCAGGACCCACTACTCGTTCGATTTGGTTTTGGTATTGCTAC  
CGCACATGACTTCGAGAGTCATGATGATATTACTGAGGAACGTCTTTATCAGAATATTTTTGCTTCTCACTTCGGTCAAT  
TAGCAATAATTTTTCTGTGGACTTCCGGAAATCTGTTTCATGTAGCTTGGCAAGGAAATTTGAGTCGTGGGTACAGGAC  
CCTTTACATGTAAGACCTATTGCTCATGCAATTTGGGATCCTCATTGTTGGTCAACCGGCCGTGGAAGCTTTTACTCGAGG  
GGGTGCTCTTGGCCCAGTGAATATCGCTTATTCTGGTGTATCAGTGGTGGTATAACAATCGGTTTACGCACTAACGAAG  
ATCTTTATACTGGCGCTCTTTTTCTATTATTTCTTTCTGCCATATCCTTAATAGCAGGTTGGTTACACCTACAACCGAAA  
TGAAACCGAGCGTTTTCTGGTTCAAAAATGCCGAATCTCGTCTGAATCATCATTTGTGAGGACTCTTTGGCGTAAGTTC  
CTTGGCTTGGACAGGGCATTAGTCCAT

Buxus

CGGACCCCGCTACTAAGAAGGACGTTCACTTCTTAAAATATCCCATATACGTGGGCGGGAACAGGGGAAGGGGTGAGATT  
TATCCTGACGGGAGCAAGAGTAACAATACAGTCTATAATGCTACAGCAGCGGGTATAATAAGCAAAATTATACGTAAAGA  
A---

AAGGGGGGATATGAAATAACCATAGCGGATGCATCGGATGGACATCAAGTGGTTAATATTATACCTCCAGGACCGGAACT  
TCTTGTTCAGAGGGTGAATCTATCAAGCTTGATCAACCATTAACGAGTAATCCCAATGTGGGTGGATTTGGTCAGGGAG  
ATGCAGAAATAGTACTTCAAGACCCATTACGTGTCCAAGGCCTTTTGTCTTCTTTCATCTGTTATTCTGGCACAAATC  
TTTTTGGTTCTT---AAAAAGAAACAGTTTGAAGAAGTTC AATTGTCGAAATG---AATTC---

ATGAGTAAAGTATATGATTGGTTGGAAGAAGCTCTCGAGATTGAGGCGATTGCAGATGATATAACTAGTAAATATGTTCC  
TCCCATGTCAACATATTTTATTGCTAGGAGGAATTACGCTTACTTGTTTTTTAGTACAAGTAGCTACGGGGTTTGCTA  
TGACTTTTTACTATCGTCCGACCGTTACTGAGGCTTTTGCTTCTGTTCAATACATAATGACTGAAGCCAACCTTTGGTTGG  
TTAATCCGATCAGTTCATCGATGGTTCGGCAAGTATGATGGTCTAATGATGATACTGCATGATTTTCGTGTCTACCTCAC  
CGGTGGATTTAAAAACCTCGCGAATTGACTTGGGTTACGGGTGTGGTCTGGCTGTATTGACCGCATCTTTTGGTGTAA  
CTGGTTATTCTTACCTCGGGACCAAATTGGTTATTGGGCAGTAAAAATTGTGACAGGTGTGCCGGAGGCTATTCTGTGA  
ATAGGAGCACCCCTTGGTAGAGCTATTACGCGGAAGTGTAGTGTGGGTCAATCCACTTTGACTCGTTTTTATAGCTTACA  
CACTTTTGTATTACCCCTTCTTACTGCCGTATTTATGTTAATGCACCTTCCCAATGATACGTAAGCAAGGTATTTCTGGTC  
CTTTA---

ATGGGAGTAACAAAAAACCTGACTTGAATGATCCTGTATTAAGGGCTAAATTGGCTAAAGGGATGGGTGATAATTATTA  
CGGAGAACC CGCATGGCCCAATGATCTTTTATATATTTTTCCGGTAGTAATTCTGGGTACTATTGCATGTAACGTAGGCT  
TGGCGGTTCTCGAACCCTCAATGATAGGTGAACCAGCAGATCCATTTGCAACTCCTTTGGAAATATTACCCGAATGGTAC  
TTCTTTCCCGTATTTCAAATACTTCGTACAGTACCAAATAAGTTATTGGGTGTTCTTTTAATGGTTTCAGTACCTGCGGG  
ATTATTGATAGTACCCTTTTGGAGAATGTTAATAAATCCAAAATCCATTTGCTCGTCCAGTAGCTACAACCGTCTTTT  
TGATCGGTACCACAGTAGCTCTTTGGTTGGGTATTGGAGCAACATTACCTATTGATAAATCCCTAACTTTAGGTCTTTTT

ATGATTGAAGTTTTTCTATTTGGAATTGTGTTAGGTCTAATTCCTATTACTTTGGCTGGATTATTCGTAAGTGCATATTT  
ACAATACAGACGCGGTGATCAGTTGGACCTT-----  
ATGCCTACTATAACT-----  
AGTTATTTTGGTTTTTCTATTGGCGGCTTCAACTATAACCCCGACTCTATTTATTGGTCTGAGCAAAATA-----  
CGACTTATT-----

ATGGATATAGTAAGTCTCGCTTGGGCTGCTTTAATGGTAGTCTTTACATTTCCCTTTCACTCGTAGTATGGGGAAGAAG  
TGGACTC---ATGATTATTCGTTCCCGGAACCA-----GAAGTGAAA-----  
ATTTTGGTGGATAGGGATCCCGTAAAAACTTCTTTGAGGAATGGGCCAGACCCGGCCATTTCTCAAGAACAATAGCTAA  
GGGCCCTGATACTACCCTTGGATCTGGAACCTACATGCTGATGCTCACGATTTTCGATAGCCATACCAGCGATTTGGAGG  
AGATCTCTCGAAAAGTATTTAGTGTCTATTTCCGGTCAACTCTCCATCATCTTTCTTTGGCTGAGTGGCATGTATTTCCAC  
GGTGCCCGTTTTTCCAATTATGAAGCATGGCTAAGTATCCTACTCACATTGGACCTAGCGCCAGGTGGTTTTGGCCAAT  
AGTGGGCCAAGAAATATTGAATGGTGTGTTGGGCGGGGTTCCGAGGAATACAAATAACCTCTGGGTTTTTTTCAGATTT  
GGCGAGCATCTGGAATAACTAGTGAATTACAACCTCTATTGTACCGCAATTGGTGCATTAGTCTTTGCAGCGTTAATGCTT  
TTTGCTGGTTGGTTCCATTATCACAAGCTGCTCCAAAATTGGCTTGGTTCCAAGATGTAGAATCTATGTTGAATCACCA  
CTTAGCGGGATTACTAGGACTTGGGTCTCTTTCTTGGGCGGGACACCAAGTACATGTATCTTTGCCGATTAACCAATTTT  
TAGACGCTGGAGTAGATCCTAAAGAGATCCCGCTTCTCATGAATTTATCTTGAATCGGGATCTTTTGGCTCAACTTTAT  
CCCAGTTTTGCGGAGGGAGCAACCCCATTTTTACCTTGAATTGGTCAAAAATATGCAGAATTTCTTACTTTTTCGTGGAGG  
ATTAGATCCAGTAACAGGGGTCTATGGCTGACCGATATTGCACACCATCATTTAGCTATTGCAATTTCTTTTCTTGATAG  
CTGGTTCATGTATAGGACCAACTGGGGCATTGGTTCATGGCCTAAAAGATATTTTAGAAGCTCATAAAGGCCCATTTTACA  
GGCCAGGGTCATAAAGGCCTCTATGAGATCCTAACAACGTATGGCATGCTCAATTATCTCTTAACCTAGCTATGTTAGG

CTCTTTAACCATTGTTGTAGCTCACCATATGTATTCCATGCCCCCTTATCCATATCTAGCTACTGACTATGGTACACAAC  
TTTTCGTTGTTTCACGCATCACATGTGGATTGGTGGATTTCTCATAGTTGGTGTCTGCTGCGCATGCAGCCATTTTTATGGTA  
AGAGACTATGATCCAACACTCGATAACAACGATCTATTAGATCGTGTCTTAGGCACCGCGATGCAATCATATCACATCT  
CAATTGGGCATGTATATTTCTAGGTTTTACAGTTTTGGTTTTGTATATTCATAATGATACCATGAGCGCTTTAGGGCGTC  
CCCAAGATATGTTTTCGGATACCGCTATAACAATTACAACCG---  
GTCTTTGCTCAATGGATACAAAACACCCATGCTTTAGCACCTAGTGTAACAGCTCCTGGTGCAACAACAAGCACTAGCGT  
GACTTGGGGAGGTGGTGATTTAGTAGCAGTAGGTGGCAAAGTTGCTTTGTTACCTATTCCATTAGGAACCGCAGATTTTT  
TGGTACATCACATTCATGCATTTACGATCCATGTGACGGTATTGATACTACTGAAAGGTGTTCTATTTGCTCGTAGCTCC  
CGCTTGATACCTGATAAAGCAAATCTTGGTTTTCGTTTTCCCTTGTGACGGACCTGGAAGAGGAGGGACATGTCAAGTATC  
CGCCTGGGATCATGTCTTCTTAGGTCTATTCTGGATGTACAATGCTATTTCCGGTAGTAATTTCCATTTTCAGTTGGAAAA  
TGCATCGGATGTTTTGGGGTAGTATAAGTGATCAAGGGGTGGTAACTCATATCACGGGAGGAAACTTTGCGCAGAGTTCC  
ATTACTATTAATGGGTGGCTCCGTGATTTTTTATGGGCACAGGCATCTCAGGTAATTCAGTCTTATGGTTCGTCAATTATC  
TGCATATGGTCTTTTTTCTAGGCGCTCATTTTGTCTGGGCTTTTCAGTTTAAATGTTTTCTATTCT---  
AGTGGCCGTGGTTATTGGCAAGAACTTATTGAATCCATCGTTTTGGGCTCATAACAAATTAAGGTTGCTCCTGCTACTCA  
GCCTAGAGCCTTGAGCATTGTACAAGGACGTGCTGTAGGAGTAACCCATTACCTTCTGGGTGGAATTGCCACAACATGGG  
CGTTCTTCTTAGCAAGAATTATTGCAGTAGGA---  
ATGGCATTAAAGATTTCCAAGGTTTAGCCAAGGCTTAGCTCAGGACCCCACTACTCGTCGTATTTGGTTTTGGTATTGCTAC  
CGCACATGACTTCGAGAGTCATGATGATATTACCGAGGAACGTCTTTATCAGAATATTTTTGCATCTCACTTCGGGCAGT  
TAGCAATAATTTTTCTGTGGACTTCCGGAAATCTGTTTCATGTGGCTTGGCAAGGAAATTTTCAGTTCATGGGTACAGGAC  
CCTTTACATGTAAGACCTATTGCTCATGCAATTTGGGATCCTCATTTTGGTCAACCGGCTGTGGAAGCCTTTACTAGAGG  
GGGTGCTCTCGGACCAGTGAATATCGCTTATTCTGGTGTTTATCAGTGGTGGTATAACAATCGGTTTACGCACATAATGAAG  
ATCTTTATACTGGAGCTCTTTTTCTATTATTTCTTTCTTCCATATCCTTAACAGCGGGTTGGTTACACCTACAACCGAAA  
TGGAAACCGAGCGTTTTCGTGGTTCAAAAATGCCGAATCTCGTCTCAATCATCATTTGTCAGGACTCTTCGGAGTAAGTTC  
CTTGGCTTGGACAGGACATTTAGTTCAT

*Calycanthus*

CGGACCCCTGCTACTAAGAAAGACGTTCACTTCTTAAAATATCCCATATATGTAGGCGGGAACAGAGGAAGGGGTGAGATT  
TATCCTGATGGGAGCAAGAGTAACAATACAGTCTATAATGCTACAGCAGCAGGTATAGTAAGCAGAATAGTACGTAAAGA  
A---

AAGGGGGGATATGAAATAAGCATAGCCGATGCATCGGATGGACGCCAAGTGGTTGATATTATACCTCCAGGACCAGA  
ACTTCTGTTTTAGAGGGGGAATCCATCAAGCTTGATCAGCCATTAACAAGTAATCCTAACGTGGGTGGATTTGGTCAGGGAG  
ATGCAGAAATAGTACTTCAAGATCCATTACGTGTCCAAGGTTTTGTTGTTTTCTTGGCATCTGTTATTCTAGCACAAATC  
TTTTTGGTTCTT---AAAAAGAAACAGTTTGGAGAAGGTTCAATTGTCCGAAATG---AATTTCT---

ATGAGTAAAGTATATGATTGGTTTCGAGGAGCGTCTCGAGATTACGGCGATTGCAGATGATATAACTAGTAAATATGTTCC  
TCCTCATGTTAACATATTTCAATTGTCTAGGAGGGATCACACTTACTTGTTTTTTAGTACAAGTAGCTACGGGTTTTGCTA  
TGACTTTTTACTACCGTCCGACTGTTACAGAGGCTTTTGCCTCTGTTCAATACATAATGACTGAAGCCAACCTTTGGTTGG  
TTAATCCGATCGGTTTCATCGATGGTCAGCAAGTATGATGGTCCTAATGATGATCCTACACGTATTTTCGTGTGTATCTCAC  
AGGTGGATTTAAAAAACCTCGCGAATTGACTTGGGTTACGGGTGTAGTCTGGCTGTATTGACTGCATCTTTTGGTGTAA  
CTGGTTATTTCTTACCTTGGGACCAAATTTGGTTATTGGGCGGTAATAATCGTGACAGGTGTACCTGAAGCTATTTCTGT  
ATAGGATCACCTTGGTAGAGTTATTACGTGGAAGTGTAGTGTGGGCCAATCCACTTTGACCCGTTTTTATAGTTTTACA  
CACTTTTGTATTACCTCTTCTTACTGCCGATTTATGTTAATGCACCTCCCAATGATACGTAAGCAAGGTATTTTCAGGTC  
CTTTA---

ATGGGAGTAACAAGAAACCTGACTTAAATGATCCTGTATTAAGAGCTAAATTTGGCTAAAGGAATGGGGCATAATTATTA  
CGGAGAACCCGCATGGCCCAATGATCTTTTATATATTTCTCCAGTAGTCATTTTAGGTACTATTGCATGTAACGTAGGCC  
TAGCGGTTCTAGAGCCGTCAATGATTGGCGAACCAGCGGATCCATTTGCAACTCCTTTGGAAATATTACCTGAATGGTAC  
TTCTTTCCCGTATTTCAAATTTCTCCGTACAGTACCTAATAAGTTATTGGGTGTTCTCTTAATGGTTTTAGTACCAACGGG  
ATTATTGACAGTACCATTTTTGGAGAATGTTAATAAATTTCCAAAATCCATTTTCGTCTGTCAGTACGTAACCGTCTTTT  
TGATTGGTACCGCGGTAGCCCTTTGGTTAGGTATTGGAGCAACATTACCTATTGATAAATCTTTAACTTTAGGCCTTTTT

ATGATTGAAGTTTTTCTATTTGGAATCGTGTAGGCTAATTCCTATTACTTTGGCCGGATTATTTCGTAACCTGCATATTT  
ACAATACAGACGCGGTGATCAGTTGGACCTT-----

ATGCCTACTATAACT-----

AGTTATTTTCGGTTTTTCTACTGGCTGCTTCAACTATAACCCAGCTCTATTGATTGGTCTGAACAAGATA-----

CGACTTATT-----

ATGGATATAGTAAGTCTCGCTTGGGCTGCTTTAATGGTAGTTTTTACATTTTCCCTTTCACTCGTAGTATGGGGAAGGAG  
TGGACTC---ATGATTATTCGTTTCGCCGGAATCA-----GAAGTGAAG-----  
ATTATGGTGGATAGGGATCCATAAAAACCTTCTTTTCGAGGAATGGGCCAGACCCGGCCATTTCTCAAGAACAATAGCTAA

GGGCCCTGATACTACTACTTGGATCTGGAACCTTCATGCTGATGCTCACGATTTTGGATAGCCATAACCAGTGATTTGGAGG  
AGATCTCTCGAAAAGTATTTAGTGCTCATTTCGGTCAACTCTCCATCATCTTTCTTTGGCTGAGTGGCATGTACTTCCAT  
GGCGCCCGTTTTTCCAATTATGAAGCATGGCTAAGCGATCCTACTCACATTGGACCTAGCGCCAGGTGGTTTTGGCCAAT  
AGTGGGTCAAGAAATATTGAATGGTGTATGGGTGGGGTTTTCCGAGGAATACAAATAACCTCTGGTTTTTTTTCAGCTTT  
GGCGAGCATCTGGAATAACTAATGAATTACAACCTCTATTGTACCGCAATTGGTGCATTGGTCTTTGCAGCGTTAATGCTT  
TTTGCCGGTTGGTTCCATTATCACAAAGCTGCTCCAAAATTGGCTTGGTTCCAAGATGTGGAATCTATGTTGAATCACCA  
CTTAGCAGGGTTACTGGGGCTTGGGTCTCTTTCTTGGGCGGGACACCAAGTCCATGTATCTTTACCGATTAACCAATTTT  
TAGACGCTGGAGTGGATCCTAAAGAGATAACCACTTCCCTCATGAATTTATCTTGAATCGGGATCTTTTGGCTCAACTTTAT  
CCCAGTTTTGCCGAGGGAGCAACCCCATTTTTTACCTTGAATTGGTCAAAAATACGCGGACTTTCTTAGTTTTCGTGGGGG  
ATTAGATCCAGTAACGGGTGGCCTATGGCTGACCGATATTGCACACCATCATTTAGCTATTGCAATTTCTTTTCTGGTGTAG  
CTGGTCACATGTATAAAGACCAACTGGGGCATTGGTCATAGTCTGAAAGATATTTTAGAGGCGCATAAAGGCCCAATTTACA  
GGCCAGGGCCATAAAGGCCTCTATGAGATCCTAACACGTCTAGGCATGCTCAATTATCTCTTAACCTAGCTATGTTAGG  
CTCTTCAACCATTTGTTGTAGCTCACCATATGTATTCCATGCCCCCTTATCCATACCTAGCTATTGACTATGGTACACAAC  
TTTTATTGTTTACACATCATATGTGGATCGGTGGATTTCTCATAGTTGGTGTCTGCTGCACATGCAGCCATTTTTATGGTA  
AGAGACTATGATCCAACCTACTCGATAACAACGATCTATTAGATCGTGTCTTAGACACCGGGATGCAATCATATCACACCT  
GAACTGGGCATGTATATTTCTAGGCTTTTACAGTTTTGGCTTGTATATTCATAATGATACCATGAGCGCTTTAGGGCGTC  
CCCAAGATATGTTTTTTCAGATACCGCTATCCAATTACAACCC---

ATCTTTGCTCAATGGGTACAAAACACCCATGCTTTAGCACCTAGTGCAACGGCCCTGGTGCAACAGCAAGCACCAGTTT  
GACTTGGGGGGTGGTGATTTAGTAGCAGTAGGCGCAAAGTCGCTTTGTTACCTATTCCATTAGGAACCGCAGATTTTT  
TGGTACATCACATTCATGCATTTACGATCCATGTGACCGTATTGATACTATTGAAAGGTGTTCTATTTGCTCGTAGCTCA  
CGTTTTGATACCTGATAAAGCAAATCTTGGTTTTCGTTTTCCCTTGTGATGGACCTGGAAGAGGGGGGACATGTCAAGTATC  
TGCCTGGGATCATGTCTTCTTAGGTCTATTCTGGATGTACAATGCAATTTCTGTAGTCATATTCCATTTTCAGTTGGAAAA  
TGCAGTCAGATGTTTTGGGGTAGTATAAGTGATCAAGGAGTGGTAACCTCATATCACAGGAGGAAATTTTGCACAGAGTTCC  
ATTACTATTAATGGATGGCTTCGGGATTTTTTATGGGCACAGGCATCTCAGGTAATTCAGTCTTATGGTTCTTTCATTATC  
GGCATATGGCCTTTTTTCTAGGTGCTCATTTTGTCTGGGCTTTTCAGTTAATGTTTCTATTC---

AGCGGCCGTGGTTATTGGCAAGAACTCATTGAATCCATCGTTTTGGGCTCATAACAAATTTAAAGTTGCTCCTGCTACTCA  
GCCTAGAGCCTTGAGCATTGTACAAGGACGTGCTGTAGGAGTAACCCATTACCTTCTGGGTGGAATTGCCACAACATGGG  
CATTCTTCTTAGCAAGAATTATTGCAGTAGGA---

ATGGCATTAAAGATTTCCAAGTTTTAGCCAAGGCTTAGCTCAGGACCCCACTACTCGTCGTATTTGGTTTTGGTATTGCTAC  
CGCACATGATTTTCGAGATCATGATGATATTACTGAGGAACGTCTTTATCAGAACATTTTTGCTTCTCACTTCGGGCAGT  
TAGCAATAATCTTTCTGTGGACTTCCGGAAATCTGTTTCATGTAGCTTGGCAAGGAAATTTTGGTTCATGGGTACAGGAC  
CCTTTACATGTAAGACCTATTGCTCATGCAATTTGGGATCCTCATTTTGGCCAACCAGCTGTAGAAGCCTTTACTCGAGG  
AGGTGCTCTCGGCCCGGTGAATATCGCTTATTCCGGTGTATTATCAGTGGTGGTATACAATCGGCTTACGCACCAATGAAG  
ATCTTTTACTGGAGCTCTTTTTCTATTATTTCTTTCTGCCATATCCTTAATTGCGGGTTGGTTACACCTACAACCCAAA  
TGGAACCAAGCGTTTTCGTGGTTCAAAAATGCCGAATCTCGTCTCAATCATCATTTGTCAGGACTCTTCGGAGTAAGTTC  
CTTAGCTTGGACAGGGCATTTAGTTTCAT

Ceratophyllum

CAGACCCTGCTACTAAGAAAGACGTTTCACTTCTTAAAATATCCTATATATGTAGGTGGGAACAGGGGAAGGGGTTCAGATT  
TATCCTGATGGTAGCAAGAGTAACAATACAGTCTATAATGCTACGGCAACGGGTATAGTAAGCAAAATAGTGCGTAAAGA  
A---

AAAGGCGGGTATGAAATAACAATAGCTGATACAGCGGATGGACACCAAGTGGTTGATATTATACCTCCAGGACCAGAGCT  
TCTTGTTCAGAGGGTGAATCCATTAAGATTGATCAACCATTAACAAGTAATCCCAATGTGGGTGGCTTTGGTTCAGGGAG  
ATGCCGAAATAGTACTTCAAGATCCATTACGTGTTCAAGGTCTCCTGTTCTTTTTTCGCATCTGTTATTTTGGCACAATC  
TTTTTGGTTCTT---AAAAAGAAACAGTTCGAGAAGGTTCAATTATCTGAAATG---AATTTT---

ATGAGTAAAGTATATGATTGGTTCGAGGAGCGTCTCGAAATTCAGGCGATTGCAGATGATATCACTAGTAAATATGTTCC  
TCCTCATGTCAACATATTTTATTGTCTGGGCGGGATCACACTTACTTGTTTTTTAGTACAAGTAGCTACGGGTTTTGCTA  
TGACTTTTTTACTATCGTCCAACCGTTACAGAAGCTTTTTCTCTGTTCAATACATAATGACTGAAGTTAACTTTGGTTGG  
TTAATCCGATCAGTTCATCGATGGTCAGCAAGTATGATGGTCTAATGATGATTTTGCACGTTTTTTCGTGTGTATCTCAC  
GGGTGGATTTAAAAAACCTCGGAATTAACCTTGGGTTACGGGTGTGGTCTGGCTGTATTGACTGCATCTTTTGGTGTAA  
CTGGTTATTCTTACCTCGGGACCAAATTGGTTATTGGGCAGTCAAAATCGTAACAGGCGTACCCGACGCTATTCTGTGA  
ATAGGGTCTCCTTTGGTGGAGTTATTACGTGGAAGTGCTAGTGTGGGTCAATCAACTTTGACCCGTTTTTATAGTTTACA  
CACTTTTGTATTACCTCTTCTTACTGCCGTATTTATGTTAATGCACCTTCCCAATGATACGTAACAGGGTATCTCTGGTC  
CCTTATAAATGGGAGTAACAAGAAACCTGACTTGAATGATCCTGTATTAAGAGCTAAATTTGGCTAAAGGGATGGGTTCAT  
AATTATTACGGAGAACC CGCATGGCCCAATGATCTTTTATATATTTTTCCAGTAGTCATTCTAGGCACTATTGCATGTAA  
TGTGGGTTTTAGCGTTTTTGAACCGTCAATGATTGGTGAACCTGCAGACCCATTTGCAACCCCTTTAGAAATATTACCCG  
AATGGTACTTTTTTCTGTATTTCAAATACTACGTACAGTACCCAATAAGTTATTGGGTGTTCTTTTTAATGGTTTTTCAGTA  
CCAGCGGGATTATTGATTGTACCTTTTTTATAGAGAATGTTAATAAATTCAAAATCCATTTTCGTCTCCAGTAGCTACAAC



AGTCTTTTTAATTGGTACCGCAGTGGCTCTTTGGTTAGGTATTGGAGCAACATTACCTATTGATAAATCCTTAACTTTAG  
GTCTTTTTTAA-----  
ATGATTGAAGTTTTTCTATTTGGAATCGTGTTAGGTTAATTCCTATTACTTTGGCCGGATTGTTTGTAAGTGCATTT  
ACAATACAGACGCGGGGATCAGTTGGACCTTTGA-----  
ATGCCTACTATAACT-----  
AGTTATTTTCGGTTTTCTACTGGCTGCTTCAACTATAACCCCAGCTCTATTGATTGGTTTTGAACAAGATA-----  
CGACTTATTTGA-----

ATGGATATTGTAAGTCTCGCTTGGGCTGCTTTAATGGTAGTTTTTACATTTTCCCTTTCACTTGTAGTATGGGGAAGAAG  
TGGACTCTAGATGATTATTCGTTTCGCCGGAACCA-----GAAGTGAAG-----  
ATTGTGGTGGATAGAGATCCCATAAAAACTTCTTTTCGAGGAATGGGCCAAACCCGGCCATTTCTCAAAAACATTAGCTAA  
GGGTCCTGATACTACTACTTGGATCTGGAACCTACATGCTGATGCTCACGATTTTCGATAGCCATACCAGTATTTGGAGG  
AGATCTCTCGAAAGGTATTTAGTGCTCATTTCGGTCAACTCTCCATCATCTTTATTTGGCTGAGTGGTATGTACTTCCAT  
GGCGCTCGTTTTTCCAATTATGAAGCATGGCTAAGTGATCCTACTCACATTAGACCCAGTGCTCAGGTGGTGTGGCCAAT  
AGTGGGCCAAGAAATATTGAATGGTGTATGTGGGCGGGGTTTCCGAGGAATACAAATAACCTCTGGTTTTCTTTCAGCTTT  
GGCGAGCATCTGGAATAACTAGTGAATTACAACCTCTATTGTACTGCAATTGGTGCATTGGTCTTTGCATCGCTAATGCTT  
TTTGCCGGTTGGTTCCATTATCACAAAGCTGCTCCAAAATTGGCTTGGTTCCAAGACGTAGAATCCATGTTGAATCACCA  
TTTAGCGGGTTACTCGGACTTGGGTCTCTCGCTTGGGCAGGACATCAAGTACATGTATCTTTACCGATTAACCAATTC  
TAGACGCTGGAGTGGATCCTAAAGAGATAACCACTTCTCATGAATTTATCTTGAATCGGGATCTTTTGGCTCAACTTTAT  
CCCAGTTTTGCGGAGGGAGCAGCCCCCTTTTTTACCTTGAATTGGTCAAAAATACGCAGACTTTCTTAGTTTTCGTGGAGG  
ATTAGATCCAGTAACAGGGGGCCTTTGGCTGACCGATATTGCGCACCATCATTTAGCTATTGCAATTTCTTTCTGATAG  
CGGGTCACATGTATAGGACCAACTGGGGTATTGGTCATGGCTTAAAAGATATTTTAGAGGCTCATAAAGGTCCATTTACA  
GGTCAGGGTCATAAAGGCCTATATGAGATCCTAACAACGTCATGGCATGCTCAATTATCCCTTAATCTAGCTATGTTAGG  
CTCTTTAACTATTATCGTAGCCCACCATATGTATTCGATGCCCCCTTATCCATACCTAGCTATCGACTATGGTACACAAC  
TTTCGTTGTTACACATCACATGTGGATCGGTGGATTTCTCATAGTTGGTGTGCTGTCACATGCAGCCATTTTTATGGTA  
AGAGACTATGATCCAACCTACGCGATAACAACGATCTATTAGATCGTGTCTTAGGCACCGCGATGCAATTATATCACATCT  
GAACTGGGTATGTATATTTCTAGGCTTTCACAGTTTTGGCTTGTATATTCATAATGATACCATGAGCGCTTTAGGGCGTC  
CCCAAGATATGTTTTAGATAACCGCTATACAATTACAACCC---

ATCTTTGCTCAATGGGTACAAAACACCCATGCTTTAGCACCTGGTGTAACTGCTCCTGGTGAACAACAAGCACCAGCTT  
AACTTGGGGGGTGTAGTGTAGTAGCAGTAGGCGGCAAAGTGCCTTGTACCTATTCCATTAGGAACGGCGGATTTTT  
TGGTACATCACATTCATGCATTTACGATCCATGTGACTGTATTGATACTATTAAGAGGTGTTCTATTTTTCTCGTAGTTCC  
CGTTTTGATACCTGATAAAGCTAATCTTGGTTTTCGTTTTCCCTTGTGACGGACCTGGAAGAGGAGGGACATGTCAAGTATC  
CGCCTGGGATCATGTCTTCTTAGGTCTATTCTGGATGTACAATGCAATTTCCGTTAGTAATATTCCATTTTCAGTTGGAAAA  
TGCAGTCAGATGTTTGGGGTAGCATAAACGATCAAGGGGTGATAACTCATATCACGGGAGGGAACCTTGCACAGAGTTCC  
ACTACTATTAATGGGTGGCTCCGGGATTTCTTATGGGCACAGGCAGCTCAGGTAATTCAGTCTTATGGTTCTTTCATTATC  
CGCGTATGGTCTTTTTCTTCCCTCGGGGCTCATTGTGCTGGGCTTTTCAGTTTAAATGTTTCTATTCC---

AGTGGCCGTGGTTATTGGCAAGAACTTATTGAATCCATCGTTTTGGGCTCATAACAAATTAAGAGTTGCTCCTGCTACTCA  
GCCTAGAGCCTTGAGCATTGTACAAGGACGTGCTGTAGGAGTAACCCATTACCTTCTGGGTGGAATTGCCACAACATGGG  
CATTCTTCTTAGCAAGAATTATTGCAGTCGGATAAATGGCATTAAAGATTTCCAAGTTTAGCCAAGGCTTAGCTCAGGAC  
CCCCTACTCGTTCGATTTGGTTTTGGTATTGCTACCGCACATGACTTCGAGAGTCATGATGATATTACTGAAGAACGCTCT  
TTATCAGAACATTTTTGCTTCTCACTTTGGACAGTTAGCAATAATTTTTCTGTGGACTTCCGGAAATCTGTTTCATGTAG  
CTTGGCAAGGAAATTTTGGAGCATGGGTACAGGACCCTTTACACGTAAGACCTATTGCTCATGCAATTTGGGATCCTCAT  
TTTGGTCAACCAGCCGTAGAAGCCTTTACTCGAGGAGGTGCTCTCGGCCAGTGAATATTGCTTATTCTGGTGTTTATCA  
GTGGTGGTATACAATCGGCTTACGCACCAATGAGGATCTTTATACTGGAGCTCTTTTTCTATTATTTCTTTCTGCCATAT  
CCTTAATTGCGGGTTGGTTACACCTACAACCCAAATGGAAACCGAGCGTTTTCGTGGTTCAAAAATGCGGAATCTCGTCTC  
AATCATCATTTGTGAGGACTCTTCGGAGTAAGTTTCTTGGCTTGGACAGGGCATTTAGTTTCAAT

Chloranthus

CGGACCCTGCTACTAAGAAAGACGTTCACTTCTTAAAATATCCCATATACGTGGGTGGGAACAGGGGAAGGGGTGAGATT  
TATCCCGATGGGAGCAAGAGTAACAATACAGTCTATAATGCTAGAACAGCAGGTATAGTAAGCAGAATAGTACGCAAAGA  
A---

AAGGGGGGATATGAAATAACCATAGCTGATGCATCGGATGGGCACCAAGTGGTTGATATTATACCCTCAGGACCAGA  
TCTTGTTCAGAGGGGGAATCCATCAAGCTTGTATCAACCATTAACGAGTAATCCCAATGTAGGTGGATTTGGTCAGGGGG  
GTGCAGAAATAGTACTTCAAGATCCATTACGTGTCCAAGGTCTTTTGTCTTCTTGGCATCTATTATTCTGGCACA  
TTTTTGGTTCTT---AAAAAGAAACAGTTTGGAGAAGGTTCAATTGTCCGAAATG---AATTTT---  
ATGAGTAAAGTATATGATTGGTTTCGAGGAGCGTCTCGAGATTACGGCGATTGCAGATGATATAACTAGTAAATATGTTCC  
TCCTCATGTCAACATATTTTATTGTCTAGGAGGTATCACACTTACTTGTTTTTTAGTACAAGTAGCTACGGGTTTTGCTA  
TGACTTTTTACTATCGTCCGACTGTTACAGAGGCATTTGCCTCTGTTCAATATATAATGACTGAAGCCAACCTTTGGTTGG

TTAATCCGATCAGTTCATCGATGGTCAGCAAGTATGATGGTCCTAATGATGATCCTGCACGTATTTTCGTGTGTATCTCAC  
AGGTGGATTTAAAAAACCTCGTGAATTGACTTGGGTTACGGGTGTGGTTCTGGCTGTATTGACTGCATCTTTTGGTGTAA  
CTGGTTATTCTTGCCTCGGGACCAAATTGGTTATTGGGCAGTCAAATCGTGACAGGTGTACCTGAAGCTATTCCTGTA  
ATAGGATCGCCTTTGGTAGAGTTATTACGTGGAAGTGCTAGTGTGGGTCAATCCACTTTGACCCGTTTTTATAGTTTTACA  
CACTTTTGTATTACCTCTTCTTACTGCCGTATTTATGTTAATGCACCTCCCAATGATACGTAAGCAAGGTATTTTCAGGCC  
CTTTA-----

AACAAAGAAACCTGACTTGACTGATCCTGTATTAAGAGCTAAATTGGCTAAAGGGATGGGGCATAATTATTACGGAGAAC  
CCGCATGGCCCAATGATCTTTTATATATTTTTCCAGTAGTAATTCTAGGTACTATTGCATGTAACGTGGGCCTAGCGGTT  
CTAGAACCGTCAATGATTGGTGAACCAGCAGATCCATTTGCAACTCCTTTGGAGATATTACCCGAATGGTACTTCTTTCC  
CGTATTTCAAATACTCCGTACAGTACCCAATAAGTTATTGGGTGTTCTTTAATGGTTTCAGTACCAACGGGATTATTGA  
CAGTACCCTTTTGGAGAATGTTAATAAATCCAAAATCCATTTTCGTGTCAGTACCAACAGTCTTTTGGATCGGG  
ACCGCAGTAGTCTTTGGTTAGGTATTGGAGCAACGTTACCTATTGATAAATCCTTAACTTTAGGTCTTTTTCAAATTGA  
TTCAACC-----ATGAAATACCACGACATATGTATC-----

ATGATTGAAGTTTTTCTATTTGGAATCGTGTTAGGTCTAATTCCTATTACTTTAGCCGGATTATTTCGTAACCGCATATTT  
ACAATACAGGCGCGGCGATCAGTTGGACCTT-----

ATGCCTACTATAACT-----  
AGTTATTTTCGGTTTTTTTACTGGCTGCTTCAACTATAACCTCAGCCCTATTGATTGGTCTGAGCAAGATA-----  
CGACTTATT-----

ATGGATACAGTAAGTCTCGCTTGGGCTGCTTTAATGGTAGTCTTTACATTTTCTCTTTCACTCGTAGTATGGGGAAGAAG  
TGGACTC---ATGATTATTCGTTTCGCCGGAACCA-----GAAGTGAAG-----

ATTGTGGTGGATAGGGATCCATAAAAACCTCTTTTGGAGGAATGGGCCAGACCCGGCCATTTCTCAAGAACAATAGCTAA  
GGGCCCGGATACTACCCTTGGATCTGGAACCTACATGCTGATGCTCACGATTTTCGATAGTCATACCAGTGATTTGGAGG  
AGATCTCTCGAAAAGTATTTAGTGCTCATTTTGGTCAACTCTCTATCATCTTTCTTTGGCTGAGCGGCATGTACTTCCAT  
GGCGCTCGTTTTTCCAATTATGAAGCATGGTTAAGCGATCCTACTCACATTGGACCCAGCGCCAGGTGGTTTTGGCCGAT  
AGTGGGTCAAGAAATATTGAATGGTGACGTGGGCGGAGGTTCCGAGGAATACAAATAACCTCCGGTTTTTTTCAGATTT  
GGCGAGCGTCTGGAATAACTAGTGAATTACAACCTCTATTGTACCAGCAATTGGTGCATTGGTTTTTGCAGCGTTAATGCTT  
TTTGCTGGTTGGTTCCATTATCACAAAGCTGCTCCAAAATGGCTTGGTTCCAAGATGTAGAATCTATGTTGAATCACCA  
CTTAGCGGGTTACTAGGACTTGGGTCCTTTCTTTGGGCGAGCACCAAATACATGTATCTTTACCGATTAACCAATTTTC  
TAGATGCTGGAGTAGATCCTAAAGAGATACCCTTCTCATGAATTTATCTTGAATCGGGATCTTTTGGCTCAACTTTAT  
CCCAGTTTTGCCGAGGGGTCAACCCCATTTTTACCTTGAATTGGTCAAAATACGCAGAATTTCTTAGTTTTTCGTGGAGG  
ATTAGATCCCGTAAACAGGGGCTATGGCTAACCGATATTGCACACCATCATTAGCTATTGCAATTCTTTTCTGATAG  
CAGGCCACATGTATAGGACCAACTGGGGCATTGGCCATGGACTGAAAGATATTTTAGAGGCTCATAAAGGTCCATTTACA  
GGCCAGGGCCATAAAGGCCTCTATGAGATCCTAACAACGTCATGGCATGCTCAATTATCTCTTAACTAGCTATGTTAGG  
CTCTTCAACCATTGTTGTAGCTCACCATATGTATTCCATGCCTCCCTATCCATACCTAGCTATTGATTATGGTACACAAC  
TTTTCGTTGTTTACACATCACATGTGGATCGGTGGATTTCTCATAGTTGGTGCTGCTGCACATGCAGCCATTTTTATGGTA  
AGAGATTATGATCCAACCTACTCGATAACAACGATCTATTAGATCGTGTCTTAGGCACCGCGATGCAATCATATCACATCT  
CAACTGGGCATGTATATTTCTAGGCTTTCACAGTTTTGGCTTGTATATTCATAATGATACCATGAGCGCTTTAGGGCGTC  
CCCAAGATATGTTTTCAGATACCGCTATAACAATTACAACC---

ATTTTTGCTCAATGGGTACAAAACACTCACGCTTTAGCACCTGGTGCAACAGCTCCTGGTGCAACAACAAGCACCAGCTT  
GACTTGGGGGGGTGCTGGTTTTAGTAGCAATAGGCGGCAAAGTTGCTTTGTTACCTATTCCATTAGGAACCGCAGATTTTT  
TGGTACACCACATTCATGCATTTACGATCCATGTGACTGTATTAATACTACTGAAAGGTGTTCTATTTGCTCGTAGCTCC  
CGTTTTGATCCCCGATAAAGCAAATCTTGGTTTTCGTTTTCCCTTGTGACGGACCTGGAAGAGGGGGGACATGTCAAGTATC  
CGCCTGGGATCATGTCTTCTTAGGTCTATTCTGGATGTACAATGCCATTTCCGTAGTCATATTCCATTTTCAGTTGGAAAA  
TGCAGTCGGATGTTTTGGGGTAGTATAAGTGATCAAGGGGTGGTACTCATATCACGGGAGGAAACTTTGCACAGAGTTCC  
ATTACTATTAATGGGTGGCTCCGGGATTTTTTATGGGCACAGGCATCTCAGGTAATTCAGTCTTATGGTTCTTCTTATC  
CGCATATGGCCTTTTTTTCTAGGTGCTCAATTTGCTGGGCTTTTAGTTTTAATGTTTTCTATTCT---

AGTGGCCGTGGTTATTGGCAAGAACTTATTGAATCCATCGTTTTGGGCTCATAACAAATTAAGTTGCTCCTGCTACTCA  
GCCTAGAGCCTTGGACATTGTACAAGGACGTGCTGTAGGAGTAACCCATTACCTTCTGGGTGGAATTGCCACAACATGGG  
CATTCTTCTTAGCAAGAATTATTGCAGTAGGA---

ATGGCATTAAAGATTTCCAAGGTTTAGCCAAGGCTTAGCTCAGGACCCCACTACTCGTGTATTTGGTTTTGGTATTGCTAC  
CGCACATGACTTCGAGAGTCATGATGATATTACTGAGGAACGCTTTTATCAGAACATTTTTGCTTCTCACTTCGGTCAGT  
TAGCAATAATCTTTTTTGGACTTCCGGAAATCTGTTTCATGTAGCTTGGCAAGGAAATTTTCAGTCATGGGTACAGGAT  
CCTTTACATGTGAGACCTATTGCTCATGCAATTTGGGATCCTCATTTTGGTCAACCAGCTGTAGAAGCCTTTACTAGAGG  
GGGTGCTCTCGGCCAGTGAATATCGCTTATTCCGGTGTATTATCAGTGGTGGTATAACAATCGGCTTACGCACCAATGAGG  
ATCTTTTACTGGAGCTTTTTTCTATTATTTCTTTCTGCTATATCTTAAATAGCAGGTTGGTTACACCTACAACCCAAA

TGGAACCAAGCGTTTCGTGGTTCAAAAATGCCGAATCTCGTCTCAATCATCATTTGTCAGGACTCTTCGGAGTAAGTTC  
CTTGGCTTGGACAGGGCATTTAGTTCAT

Citrus

CGAACCCCGCGACTAATAAAGATGCTTACTTCTTAAAATATCCAATATACGTAGGTGGGAACAGGGGAAGGGGTGAGATT  
TATCCCGACGGGAACAAAAGTAACAATACGGTTTATAATGCTACATCTGCGGGTATAGTAAGCAAAAATCATACGAAAAGA  
A---

AAAGGGGGATACGAAATAACCATAACGGATGCATCGAATGGACGTGAAGTGGTTGATATTATCCCCCAGGACCAGA  
TTCGTGTTTCAGAGGGCCAATCTATCAAACCTTGATCAACCATTAACAAGTAATCCTAATGTAGGCGGGTTTGGTCAGGCAG  
ATGCAGAAATAGTACTTCAAGATCCATTACGTGTCCAAGGCCTTTTGTCTTTTTGGCATCTGTTGTTTTGGCACAATA  
TTTTTGGTTCTT---AAAAAGAAACAGTTTGAGAAGGTTCAATTGTCCGAAATG---AATTC-----

AAAGTCTACGATTGGTTTCGAAGAACGTCTCGAGATTACGGCGATTGCGAGATGATATAACTAGTAAATACGTTCCCTCTCA  
TGTCAACATATTTTTATTGTCTGGGAGGAATTACGCTCACTTGTTTTTTAGTACAAGTAGCTACAGGGTTTGTCTATGACTT  
TTTACTACCGCCCGACTTACTGAGGCTTTTGCCTCTGTTCAATACATAATGACGGAAGTTAACTTCGGGTGGTTAATT  
CGATCGGTTTCATCGATGGTTCGCAAGTATGATGGTCTAATGACAATCCTGCACGATTTTCGCGTGTATCTCACCGGGGG  
TTTTAAAAACCTCGCAATTGACTTGGGTTACAGGTGTGGTTCTGGCTGTATTGACCGCATCTTTTGGTGTAAACAGGTT  
ATTCTTTACCTTGGGACCAAATTGGATATTGGGCAGTAAAATTGTAACAGGCGTGCCCGAAGCAATTCCGGTAATAGGA  
TCGCCTTTGGTAGAGTTATTACGCGGAAGTGCTAGTGTGGGACAGTCCACTTTGACTCGTTTTTATAGTTTACACACTTT  
TGTATTACCTCTTCTTACTGCCGTATTTATGTTAATGCATTTCTAATGATACGTAACAAGGTATTTCTGGCCCTTTA--  
--

ATGGGA??AACAAAAAACCTGACTTGAATGATCCTGTATTAAGGGCTAAGTTGGCTAAGGGTATGGGTGATAATTATTA  
TGGAGAACCCCGCATGGCCCAACGATCTTTTATATATTTTTCCAGTAGTAATTCTAGGTACTATTGCATGTACCGTAGGCT  
TAGCGGTTCTAGAACCATCAATGATTGGTGAACCCGCGGATCCATTTGCAACTCCTTTGGAAATCTTACCCGAATGGTAT  
TTCTTTCCCGTATTTCAAATACTTCGTACAGTACCCAATAAGCTGTTGGGTGTTCTTTTAAATGGTTTCAGTACCTACGGG  
ATTATTAACAGTACCTTTTTTGGAAAATGTTAATAAATTCAAAATCCATTTGCGCGTCCCGTAGCGACAACCGTCTTTT  
TGATTGGGACCGCAGTGGCCTTGTGCTTGGGTATTGGAGCAACATTACCTATTGAAAAATCCCTAACTTTAGGTCTTTTT  
-----

ATGATTGAAGTCTTTCTATTTGGAATCGTCTTAGGTCTAATTCCTATTACTTTGGCTGGATTATTCGTAACCGCTATTT  
ACAATACAGACGTGGTGTATCAGTTGGACCTT-----  
ATGCCTACTATAACT-----  
AGTTATTTTGGTTTTCTACTAGCGGCTTTAACTATAACCTCGGCTCTATTTATTGGTCTGAGTAAGATA-----  
GGACTTATT-----  
-----

ATGGATATAGTAAGTCTCGCTTGGGCTGCTTTAATGGTAGTCTTTACATTTTCCCTTTTCGCTCGTAGTATGGGGAAGAAG  
TGGACTC---ATGATTATTCGTTCCGCCGAACCA-----GAAGTAAAA-----  
ATTTTGGTAGATAGGGATCCCGTAAAAACTTCTTTTCGAGGAATGGGCCAAACCGGGGCATTTCTCAAGAACCATAGCTAA  
GGGACCTGAGACTACCACTTGGATCTGGAACCTACATGCTGATGCTCACGACTTCGATAGCCATAACAGTGATTTGGAGG  
AGATCTCTCGAAAAGTATTTAGTGCCCATTTTCGGACAACCTCCCATCATTTTTCTTTGGCTGAGCGGAATGTATTTCCAC  
GGTGTCTGTTTTTCCAATTATGAAGCCTGGCTAAGCGATCCTACTCACATTGGACCTAGCGCACAGGTGGTTTGGCCAAT  
AGTGGGCCAAGAAATATTGAACGGTGTATGTGGGCGGGGTTTCCGAGGAATACAAATAACCTCCGGGTTTTTTCAGCTTT  
GGCGAGCATCTGGAATAACTAGTGAATTACAACCTCTATTGTACCGCAATTGGCGCATTGATTTTTGCAGCCTTAATGCTT  
TTTGCTGGTTGGTTCCATTATCACAAAGCTGCTCCAAAATTGGCTTGGTTTCAGGATGTAGAATCTATGTTGAACCACCA  
TTTAGCGGGGCTGCTAGGGCTCGGGTCCCTTTCTTGGGCCGGGCATCAAGTACATGTATCTTTACCGATTAACCAATTTT  
TAAACGCTGGAGTAGATCCTAAAGAGATCCCACTTCCCTCATGAATTTATCTTGAATCGGGATCTTTTGGCTCAACTTTAT  
CCCAGTTTTTCCGAAGGAGCAACCCCATTTTTTACCTTGAATTGGTCAAAAATATGCGGAATTTCTTACTTTTCGTGGCGG  
ATTAGATCCAGTAACTGGGGTCTATGGCTGACCGATATTGCACACCATCATTTAGCTATTGCAATTTCTTTTCCTGATCG  
CGGGGCACATGTATAGGACCAACTGGGGGATTGGTCAATGGTCTAAAAGATATTTTAGAGGCTCATAAAGGTCCATTTACA  
GGTCAAGGCCATAAAGGATTATATGAGATCCTAACAACATCATGGCATGCTCAATTATCGCTTAACTAGCTATGTTAGG  
ATCTTTAACCATTATTGTAGCTCATCATATGTATTTCCATGCCCCCTTATCCATATCTAGCTACTGACTATGGTACACAAC  
TGTCATTGTTTACACACCACATGTGGATTGGTGGATTTCTCATTGTTGGCGCTGCTGCGCATGCAGCCATTTTTATGGTA  
AGAGACTATGATCCAACACTCGATAACAACGATCTCTTAGATCGTGTCTTTCGGCATCGCGATGCAATCATATCACATCT  
CAACTGGGTATGTATATTTCTAGGATTTTACAGTTTTGGTTTTGTATATTCATAATGATACCATGAGTGCTTTAGGGCGTC  
CACAAGATATGTTTTTCAGATACCGCGATACAATTACAACCT---

GTCTTTGCTCAATGGATACAAAACACCCACGCCTTAGCACCCGGCGGAACGGCCCTGGTGCAACAGCAAGCACCAGTTT  
GACTTGGGGGGGTGTTGATTTAGTGGCAGTGGGCGAAAAGTTGCTTTGTTACCTATTCCATTAGGAACCGCGGATTTTT  
TGGTACATCACATTCATGCATTTACGATTCATGTGACGGTATTGATACTCCTGAAAGGAGTTCTCTTTGCTCGTAGCTCG  
CGTTTTGATACCGGATAAAGCAAATCTTGGGTTTTCGTTTTCCCTTGTGATGGTCTTGAAGAGGGGGGACATGTCAAGTATC  
CGCTTGGGATCATGTCTTCTTAGGACTATTCTGGATGTACAATGCAATTTCCGGTAGTAATATTCCATTTTCAGTTGAAAA

TGCAGTCAGATGTTTTGGGGTAGTATAAGTGATCAGGGGGTGGTAACTCATATTACAGGAGGAACTTTGCGCAGAGTTCC  
ATTACGATTAATGGGTGGCTCCGCGATTTTTTATGGGCACAGGCATCCCAGGTAATTCAGTCTTATGGTTCTCATTATC  
TGCATATGGCCTTTTTTCTAGGTGCTCATTGTTGATGGGCTTTTAGTTTTAATGTTTCTATTCC---  
AGCGGGCGTGGTTATTGGCAAGAAGCTTATTGAATCCATCGTTTTGGGCTCATAATAAATTTAAAGTTGCTCCTGCTACTCA  
GCCTAGAGCCTTGAGCATTGTACAAGGACGCGCTGTAGGAGTAACCCATTACCTTCTAGGTGGAATTGCCACAACATGGG  
CGTTCTTCTTAGCAAGAATTATTGCAGTAGGA---  
ATGGCATTAAAGATTTCCAAGGTTTAGCCAAGGCTTAGCTCAGGACCCCACTACTCGTCGTATTTGGTTTTGGTATTGCTAC  
CGCACATGACTTCGAGAGTCATGATGATATTACTGAGGAACGTCTTTATCAGAATATTTTTGCTTCGCACTTCGGGCAAT  
TAGCAATAATTTTTCTGTGGACTTCCGGAAATCTCTTTCATGTAGCTTGGCAAGGAAATTTGAGGCATGGGTACAGGAC  
CCTTTACATGTAAGACCTATTGCTCATGCAATTTGGGATCCTCATTGTTGGTCAACCGGCCGTGGAAGCTTTTTCTCGGGG  
AGGTGCTCTTGGCCCGGTGAATATCGCTTATTCTGGTGTGTTATCAGTGGTGGTATAACAATCGGTTTACGCACTAATGAGG  
ATCTTTATACTGGAGCTCTTTTTCTATTATTTCTTCCGCCATATCTTTAATAGCGGGTTGGTTACACCTACAACCGAAG  
TGGAAACCGAGCGTTTTCTGGTTCAAAAATGCCGAATCTCGTCTGAATCATATTTGTGAGGACTGTTTCGGAGTAAGTTC  
CTTGGCTTGGACAGGGCATTTAGTACAT

Coffea

CCGACCCCGCTACTAAGAAGGATGTTCACTTCTTAAAATATCCTATATACGTAGGCGGGAACAGGGGAAGGGGTGAGATT  
TATCCCGACGGGAGCAAGAGTAACAATACAGTTTATAATGCTACAGGAGCAGGTATAGTAAGCAAAATTATACGAAAAGA  
A---AAAGGGGGATATGAAATAACCATAACAGAT---  
ACGGATGGACGTCAAGTGGTTGATATTATCCCCCAGGACCAGAATCTTGTGTTTCAGAGGGCGAATACATCAAATTGGA  
TCAACCATTAACGAGTAACCCCAATGTGGGCGGATTTGGTCAGGGAGATGCAGAAATAGTACTTCAAGATCCATTACGTG  
TCCAAGGCCTTTTTGTTCTTCTTGGCATCTGTTATTTTGGCACAAATCTTTTTGTTTCT---  
AAAAAGAAACAGTTCGAGAAGGTTCAATTGGCCGAAATG---AATTTCT---  
ATGAGTAAAGTCTATGATTGGTTTCGAAGAACGTCTCGAGATTCAAGCGATTGCAGATGATATAACTAGTAAATACGTTCC  
TCCCCACGTCAATATATTTTTATTGCTTAGGGGGAATTACGCTTACTTGTTTTTTAGTCCAAGTTGCTACGGGATTTGCTA  
TGACTTTTTACTACCGTCCAACCGTTACTGAGGCTTTTGCTTCTGTTCAATACATAATGACTGAAGCTAACTTTGGTTGG  
TTAATACGGTCAGTTCATCGATGGTCAGCAAGTATGATGGTCCTAATGATGATTCTTCATGTATTTCTGTGTATCTCAC  
CGGTGGATTTAAAAAACCTCGCGAATTGACTTGGGTTACAGGTGTGGTCTGGCTGTATTGACCGCATCTTTTTGGTGTAA  
CTGGTTATTCCTTACCTCGGGACCAAATCGGTTATTGGGCAGTAAAAATTGTAACAGGTGTACCTGAAGCTATTCCTGTA  
ATAGGATCTCCTTTGGTAGAATTATTGCGCGGAAGTGTAGTGTGGGACAATCCACCTTGACTCGTTTTTATAGTTTTACA  
CACTTTTGTATTGCCGCTTCTTACTGCCGTATTTATGTTAATGCATTTCCAATGATACGTAACAAGGTATTTCTGGCC  
CTTTA---  
ATGGGAGTAACAAAAAGCCTGACTTGAATGATCCTGTATTAAGAGCTAAATTGGCTAAAGGTATGGGTCATAATTATTA  
TGGAGAGCCCGCATGGCCCAACGATCTGTTATATATTTTTCCAGTAGTAATTCTAGGTACTATTGCATGTAACGTAGGCT  
TAGCGGTTCTAGAACCATCAATGGTTGGTGAACCGGCAGATCCATTTGCAACTCCTTTGGAAATATTACCGGAATGGTAT  
TTCTTTCCCGTATTTCAAATACTTCGTACAGTACCAAATAAATTGTTGGGTGTTCTTTTAAATGGTTTTAGTACCTGCGGG  
ATTATTAACAGTACCCTTTTTAGAGAATGTTAATAAATTTCAAATCCATTTTCGTCGTCCAGTAGCGACAACCTGTCTTTT  
TGATTGGTACCGCAGTCGCCCTTTGGTTGGGTATTGGTGCAACATTACCTATTGATAAATCCCTAACTTTGGGTCTTTTT

-----  
ATGATTGAAGTTTTTCTATTTGGAATCGTGTAGGTCTAATTCCTATTACTTTGGCTGGATTATTCGTAACCTGCATATTT  
ACAATACAGGCGTGGTGATCAGTTGGACCTT-----  
ATGCTTACTATAACA-----  
AGTTATTTTGGTTTTCTACTAGCAGCTTTAACTATAACCTCAGCTCTATTTATTGGTTTTGAACAAAATA-----  
CGACTTATT-----  
-----

ATGGATATAGTAAGTCTCGCTTGGGCTTCTTTAATGGTAGTCTTTACATTTTCCCTTTCACTCGTAGTGTGGGGAAGGAG  
TGGACTC---ATGATTATTCGTTCCGCCGAACCA-----GAAGTAAAA-----  
ATTTTGGTAGATAGGGATCCCGTAAAAACTTCTTTTCGAGGAATGGGCCAAACCAGGTCATTTCTCAAGAACAATAGCTAA  
AGGACCTGATACTACCACTTGGATCTGGAATCTACATGCTGATGCTCATGATTTTCGATAGCCATAACCAGTGATTTGGAGG  
AGATTTCTCGAAAAGTATTTAGTGCCCATTTTCGGCCAACCTCCATCATCTTTCTTTGGTTGAGCGGCATGTATTTCCAC  
GGTGCTCGTTTTTCCAATTATGAAGCGTGGCTAAGTGATCCAACCTCACATTGGGCCTAGTGCCAGGTGGTTTTGGCCAAT  
AGTGGGCCAAGAAATATTGAATGGTGATGTGGGCGGAGGTTCCGAGGAATACAAATAACTTCCGGTTTTTTTTAGATTT  
GGAGAGCATCTGGAATAACTAATGAATTACAACCTCTATTGTACCGCAATTGGTGCATTGATTTTTGTCAGCGTAAATGCTT  
TTTGCTGGTTGGTTTTATTATCATAAAGCAGCTCCAAAATTGGCTTGGTTTTCAAGATGTAGAATCTATGTTGAATCACCA  
TTTAGCGGGGCTACTAGGACTTGGGTCTCTCTTGGGCGGGACATCAAGTACATGTATCTTTACCGATTAACCAATTTTC  
TAAACGCTGGAGTAGATCCTAAAGAAATACCCTTCTCATGAATTTATCTTGAATCGGGATCTTTTGGCTCAACTTTAT  
CCTAGTTTTGCGGAGGGAGCAACCCATTTTTTACCTTGAATTGGTCAAAAATATGCGGAATTTCTTACCTTTTCGTGGAGG  
ATTAGATCCAGTAACTGGGGTCTGTGGCTGACCGATATTGCACACCACCATTTAGCTATTGCAATTTCTTTTCTGATAG

CAGGTCACATGTATAGGACCAACTGGGGTATTGGTCATGGTCTGAAAGATATTTTAGAAGCTCACAAAGGTCCATTTACA  
GGCCAGGGCCATAAAGGACTATATGAGATACTAACAACGTCATGGCATGCTCAATTATCTCTTAATCTAGCCATGTTAGG  
CTCTTTAACCATTGTTGTAGCTCACCACATGTATTCCATGCCCCCTTATCCATATCTAGCTACTGACTATGGTACACAAT  
TGTCGTTGTTTACACACCACATGTGGATTGGTGGATTTCTCATAGTTGGTGGTCTGCTGCGCACGCAGCCATTTTTATGGTA  
AGAGACTATGATCCAACACTACTCGATAACAATGATCTATTAGATCGTGTCTTAGACATCGTGATGCAATTATATCACATCT  
CAACTGGGCATGTATATTTCTAGGCTTTCACAGTTTTGGTTTTGTATATTCATAATGATACCATGAGCGCTTTAGGGCGTC  
CTCAAGATATGTTTTAGATACCGCTATCCAATTACAACC---

GTTTTTGCTCAATGGATAACAAACACCCACGCTTTAGCACCCGGTGCAACGGCTCCTGGTGCAACAGCAAGCACCAGTTT  
AACTTGGGGAGGTGGTGAATTTGGTAGCAGTGGGTGGCAAAGTGGCTTTGTTACCTATTCCATTAGGAACCGCAGATTTTT  
TGGTCCATCACATTCATGCATTTACGATTCATGTGACAGTATTGATACTCCTGAAAGGTGTTCTATTTGCTCGTAGCTCC  
CGCTTGATACCCGGATAAAGCAAATCTTGGTTTTCGTTTTCTTGTGATGGGCCCGGAAGGGGGGTACATGTCAAGTATC  
GGCTTGGGATCATGTCTTCTTAGGACTATTCTGGATGTACAATGCAATTTTCGGTAGTAATATTTCCATTTTCAGTTGGAAAA  
TGCAGTCAGACGTTTTGGGGCAGTATAAGTGATCAAGGGGTAGTAACCTCATATTACGGGAGGAAACTTTGCGCAGAGTTCT  
ATTACTATTAACGGATGGCTCCGCGATTTCTTATGGGCGCAGGCATCCCAGGTAATTCAGTCTTATGGTTTCGTCATTATC  
TGCATATGGCCTTTTTTCTAGGTGCTCATTTTGTATGGGCTTTTAGTTTTAATGTTTCTATTCT---

AGTGGACGTGGTTATTGGCAAGAACTTATTGAATCCATCGTTTTGGGCTCATAATAAATTAAGGTTGCTCCTGCTACTCA  
GCCGAGAGCCTTGAGCATTGTACAAGGACGTGCTGTAGGAGTAACCCATTACCTTCTGGGTGGAATTGCCACAACATGGG  
CATTCTTCTTAGCAAGAATTATTGCAGTAGGA---

ATGGCATTAAAGATTTCCAAGGTTTAGCCAAGGCTTAGCTCAGGACCCACTACTCGTCGTATTTGGTTTTGGTATTGCTAC  
CGCACATGACTTCGAGAGTCATGATGATATTACTGAAGAACGCTTTTATCAGAATATTTTTGCTTCTCACTTTGGTCAAT  
TAGCAATAATTTTTCTATGGACTTCCGGAAATCTGTTTCATGTAGCTTGGCAAGGAAATTTGAGTCATGGGTACAGGAC  
CCTTTACACGTAAGACCTATTGCTCATGCAATTTGGGATCCTCATTTTGGTCAACCGGCTGTGGAAGCTTTTACTCGAGG  
GGGTGCTCTTGGCCCAGTAAATATCGCCTATTCTGGTGTATATCAGTGGTGGTATAACAATCGGTTTACGCACCAATGAAG  
ACCTTTATACTGGAGCTCTTTTTCTATTATTTATTTCTGCCATATTCTTAATAGCAGGTTGGTTACACCTACAACCGAAA  
TGGAAACCGAGTGTTCGTGGTTCAAAAATGCCGAATCTCGTCTGAATCACCATTTGTCAGGACTCTTCGGTGTAAAGTTC  
CTTGGCTTGGACAGGGCATTTAGTACAT

Cucumis

CGGACCCTGCGACTAAGAAAGATGTTCACTTCTTAAAATATCCCATATACGTAGGCGGGAACAGGGGAAGGGGTGAGATT  
TATCCCGACGGGAGTAAGAGTAATAATAATGTTTATAATGCTACAGCAGCAGGGATAGTAAGTAAAATAATACGAAAAGA  
A---

AAAGGAGGATATGAAATAACCATAGTGGATGCCGCAATGGGCGTCAAGTGGTTGATATTATCCCTCCAGGACCAGA  
TCTTGTTCAGAGGGCGAATCCTTCAAACCTTGATCACCCATTAACGAGTAATCCTAATGTGGGAGGATTTGGTCAGGGAG  
ATGCGGAAATCGTCTTCAAGATCCATTACGTGTCCAAGGCCTTTTGTCTTTTTTGCATCTGTTATTTTGGCACA  
TTTTAGTTCTT---AAAAAGAAACAGTTTGGAGAAGGT-CAATTGTCCGAAA-----

ATGAGTAAAGTGTATGATTGGTTTCGAAGAACGCTTTGAAATTCAGGCGATTGCGGATGATATAACTAGTAAATACGTTCC  
TCCTCATGTCAACATATTTTATTGTCTAGGAGGAATTACGCTTACTTGTTTTTTAGTACAAGTAGCTACCGGGTTGCTA  
TGACTTTTTACTACCGTCCGACCGTTACTGAGGCTTTTGCTTCTGTTCAATATATAATGACGGAAGCAAATTTGGTTGG  
TTAATCCGATCAGTTTCATCGATGGTTCGGCAAGTATGATGGTCTTAATGATGATCCTGCACGATTTTCGCGTGTATCTTAC  
TGGTGGATTTAAAAAACCTCGTGAATTGACTTGGGTTACAGGTGTGGTTCTGGCTGTATTGACCGCATCCTTTGGTGTAA  
CTGGTTATTCTTACCTCGGGACCAAATTTGGTTATTGGGCAGTCAAATTTGTAACAGGTGTACCGGAAGCTATTCCAGTA  
ATAGGGTCGCCTTTGGTAGAGTTATTACGCGGAAGTGTAGTGTGGGACAATCTACCTTGACTCGTTTTTATAGTTTACA  
CACTTTTGTATTACCTCTTCTTACTGCCGTATTTATGTTAATGCACCTCCCAATGATACGTAAGCAAGGCATTTCTGGTC  
CTTTA---

ATGGGAGTAACAAAAAACAGATTTGAATGATCCTGTATTAAGAGCTAAATTTGGCTAAGGGTATGGGTGATAATTATTA  
CGGAGAACCCGCATGGCCCAATGATCTTTTATATATTTTCCAGTAGTCATTCTAGGTACTATTGCATGTAACGTGGGCT  
TAGCGGTTCTAGAACCATCAATGATTGGTGAACCCGCAGATCCATTTGCAACTCCTTTGGAAATATTGCCGGAATGGTAT  
TTCTTTCCCGTATTTCAAATACTTCGTACAGTGCCAAATAAGTTATTGGGTGTTCTTTTAAATGGTTTTCCGTACCGGCGGG  
ATTATTAAGTGTACCTTTTTGGAGAATGTCAATAAATTTCAAATCCATTTTCGTCGTCCAGTAGCGACAACCGTCTTTT  
TGATTGGTACCGCAGTAGCCCTTTGGTTGGGTATTGGAGCAACATTACCGATTGATAAATCCCTAACTTTAGGTCTTTTT  
-----

ATGATTGAAGTTTTTTTTATTTGGAATCGTATTAGGTCTAATTCCTATTACTTTGGCTGGATTATCTGTGACCGCATATTT  
ACAATACAGACGGGGGATCAGTTGGACCTT-----

ATGCTTACTATCACT-----  
AGTTATTTTCGGTTTTCTACTAGCAGTTTTAACTATAACCTCAGCTCTATTTATCGGTCTGAACAAGATA-----  
AGACTTATT-----  
-----

ATGGATATGGTAAGTCTCGCTTGGGCTGCTTTAATGGTAGTCTTTACATTTTCTCTTTCCCTCGTAGTATGGGGAAGAAG

TGGACTC---ATGATTATTCGTTTCGCCGGAACCA-----GAAGTCAAA-----  
ATTTTGGTAGATAGGGATCCCATAAAACTTCTTTTCGAGGACTGGGCCAGACCGGGTCATTTCTCGAGAACAATAGCTAA  
GGGTCTGATACTACCACTTGGATCTGGAACCTTCATGCTGATGCTCACGATTTTCGATAGCCATACTAGTGATTTGGAGG  
AGATCTCTCGAAAAGTCTTTAGTGCCCATTTTCGGCCAACCTCTCCATCATCTTTCTTTGGCTGAGTGGGATGTATTTCCAC  
GGTGCTCGTTTTTCCAATTATGAAGCATGGCTAGGTGATCCTACTCACATTGGCCCTAGTGCCAGGTGGTTTTGGCCAAT  
AGTGGGCCAAGAAATATTGAATGGTGTAGTGGCGGGGGTTTTTCGAGGAATACAAATAACATCTGGGTTTTTTCAGATGT  
GGCGAGCATCTGGAATAACTAATGAATTACAACCTCTATTGTACCGCAATTGGTGCATTAGTCTTTGCAGCCTTAATGCTT  
TTTGCTGGTTGGTTTTATTATCACAAGGCTGCTCCAAAATTGGCTTGGTTCCAAGATGTAGAATCCATGTTGAATCACCA  
TTTAGCGGGTCTGCTAGGACTTGGGTCTCTTTCTTTGGGCGGGACATCAAGTCCACGTATCTTTACCGATTAACCAATTC  
TAAATGCTGGAGTAGACTCTAAAGAGATTCCACTTCTCATGAATTTATCTTGAATCGGGATCTTTTGGCGCAACTTTAT  
CCTAGTTTTGCTGAGGGAGCAACCCCATTTTTTCACTTTGAATTTGGTCAAAAATATGCGGAATTTCTTACTTTTTCGCGGAGG  
GTTAGATCCAGTAACCGGGGTCTATGGTTAACCGATATTGCACACCATCATTTAGCTATTGCAATTTCTTTTCTGATAG  
CGGGTACATGTATAGGACCAACTGGGGCATTGGTCATGGTATAAAAAGATATTTTAGAGGCTCATAAAGGTCCATTTACA  
GGCCAGGGCCATAAAGGACTATATGAGATCCTAACAACGTCATGGCATGCTCAATTATCTATTAACCTAGCTATGTTAGG  
CTCTTTAACCATTATTGTAGCTCACCATATGTATGCAATGCCCCCGTATCCATATCTAGCTACTGACTATGGTACACAAC  
TTTCATTGTTACACATCACATGTGGATTGGTGGATTTCTCATAGTTGGTGTGCTGCTGCGCATGCAGCCATTTTTATGGTA  
AGAGACTATGATCCAACCTACTCGCTACAACGATCTATTAGATCGTGTACTTAGGCATCGTGATGCAATCATATCACATCT  
GAACTGGGTGTGTATATTTTTAGGCTTTTACAGTTTTGGTTTTGTATATTCATAACGATACCATGAGTGCTTTAGGGCGTC  
CACAAGATATGTTTTAGATACCGCTATAACAATTACAACCC--GTCCTTGGCTCAATGGATAACA--  
ACACCCATGCTTTAGCACCTAGGATAACGGCCCCGGTGAACAACAGGCACCAGTTTGACTTGGGGGGGTGGTGATTTA  
GTGGCAGTGGGCGGCAAAGTTGCTTTGTTACCTATTCCGTTAGGAACCGCAGATTTTTTGGTACACCATATTCATGCATT  
TACGATTCATGTAACGGTATTGATACTCCTGAAAGGTGTTCTATTTTTCTCGTAGCTCGCGTTTTGATACCGGATAAAGCAA  
ATCTTGGTTTTCGTTTTCCCTTGTGATGGACCGGGAAGAGGGGGTACATGTCAAGTATCCGCTTGGGATCATGTCTTTTA  
GGGCTATTTTGGATGTACAATTCCATTTCTGTAGTAATATTCATTTTCAGTCGGAAAATGCAGTCAGATGTCTGGGGTAG  
TGTAAGTGATCAAGGGGTACTAACTCATATTACGGGAGGAACTTTGCGCAGAGTTCTATTACTATTAATGGGTGGCTTC  
GCGATTTCTTATGGGCACAGGCATCCCAGGTAATTCAGTCTTATGGTTCTTCAATTATCTGCATATGGCCTGTTTTTCTTA  
GGTGCTCATTTTTGTATGGGCTTTTAGTTTTAATGTTTTCTATTC---  
AGCGGGCGTGGTTATTGGCAAGAACTTATTGAATCCATCGTTTTGGGCTCATAATAAATTAAGGTTGCTCCTGCTACTCA  
GCCTAGAGCCTTGAGCATTTGTTCAAGGACGTGCTGTAGGAGTAACCCATTACCTTCTGGGTGGAATTGCCACAACATGGG  
CGTTCTTCTTAGCAAGAATTTGTCAGTCGGA---  
ATGGCACTAAGATTTCCAAGGTTTAGCCAAGGCTTAGCTCAGGACCCCACTACTCGTCGTATTTGGTTTTGGTATTGCTAC  
CGCGCATGACTTCGAAAGTCATGATGATATTACTGAAGAACGCTTTTATCAGAATATTTTTGCTTCTCATTTTCGGGCAAT  
TAGCAATAATTTTTCTGTGGACTTCCGGAATCTGTTTTCATGTAGCTTGGCAAGGAAATTTGAAGCATGGGTACAGGAC  
CCTTTACATGTAAGACCTATTGCTCATGCAATTTGGGATCCTCATTTTTGGTCAACCGGCCGTCGAAGCTTTTACTCGAGG  
TGGTGTCTTTGGCCCAGTGAATATCGCTTATTCTGGTGTTTATCAGTGGTGGTATAACAATCGGTTTACGCACTAATGGGG  
ATCTTTTACTGGAGCTCTTTTTCTATTATTTCTTTCTGCGATATCTTTAATAGCGGGTTGGTTACATCTACAACCGAAA  
TGGAACCGAGCGTTTTCTGGTTTTAAAAATGCCGAATCTCGTCTGAATCATCATTTGTCAGGACTATTTCGGAGTAAGTTC  
CTTGGCTTGGACAGGACATTTAGTCCAT  
Daucus  
CGGACCCCGCTACTACGAAAGAGGTTCACTTCTTAAAAATATCCTATATACGTAGGCGGAAACAGGGGAAGGGGTGAGATT  
TATCCCGACGGGAGCAAAAGTAACAATACAGTTTATAATGCTACCTCAGCAGGTATAGTAGGTAATAATAACGAAAAGA  
A---  
AAAGGGGGTTACGAAATAACCATAGCGGATGCATCGGATGGACGTCAAGTGGTTGATATTATCCCTCCAGGGCCAGA  
TCTTGTTCAGAAAGGCGAATCTATCAAATTGGATCAACCGTTGACGAGTAATCCTAATGTGGGCGGATTTGGCCAGGGAG  
ATGCAGAAATAGTACTTCAAGACCCCTTACGTGTCCAAGGCCTTTTGTCTTCTTGGCATCTGTTATTTTGGCACA  
TTTTTGGTTCTT---AAAAAGAAACAGTTCGAGAAGGTTCAATTGTCAGAAATG---AATTTCT---  
ATGAGTAAAGTATATGATTGGTTTTGAAGAACGCTCAGGATTCAGGCGATTGCGGATGATATAACTAGTAAATACGTTCC  
TCCTCATGTCAACATATTTTTATTGTCTGGGAGGCATTACGCTTACTTGTTTTTTGTAGTACAAGTGGCTACGGGGTTGCTA  
TGACTTTTTACTATCGTCCGACTGTTACGGACGCTTTTGGTTTCGGTTCAATACATAATGACTGAAGCTAATTTTTGGTTGG  
TTAATCCGATCAGTTCATCGATGGTCAGCAAGTATGATGGTTCTAATGATGATCTTGCATGTATTTTCGGGTTTATCTCAC  
TGGTGGATTTAAAAAGCCTCGTGAGTTAACTTGGGTTACAGGTGTGGTTCTAGCTGTATTGACTGCATCTTTTGGTGTAA  
CTGGTTATTCTTACCTCGGGACCAAAATTGGTTATTGGGCAGTGAAAATTGTAACAGGTGTACCCGAAGCTATTCTGTA  
ATAGGGTTCGCTTTGGTAGAATTATTGCGTGGAAGTGCTAGTGTGGGACAATCCACTTTGACTCGTTTTTATAGCTTACA  
CACTTTTGTATTGCCGCTTCTTACTGCTGTATTTATGTTAATGCATTTTCCAATGATACGTAACAAGGCATTTCTGGTC  
CTTTA---  
ATGGGAGTAACAAAAAACCTGACTTGAATGATCCTGTATTAAGAGCTAAATTAGCTAAAGGTATGGGTCATAATTATTA  
CGGAGAGCCCGCTTGGCCCAATGATCTTTTATATATTTTTCCAGTAGTAATTCTAGGAACCTATTGCATGTAACGTAGGTT

TAGCGGTTCTAGAACCATCAATGATTGGTGAACCAGCAGATCCATTTGCAACCCCTTTGGAAATATTACCCGAATGGTAT  
TTCTTTCCCGTATTTCAAATACTTCGTACAGTACCCAATAAATTATTGGGTGTCCTTTTAATGGTTTTAGTACCTGTGGG  
ATTATTAACAGTACCTTTTTTGGAGAATGTTAATAAATTCCAAAACCCATTTTCGTTCGTCCAGTAGCGACAACCGTCTTTT  
TGATTGGTACCGCAGTGGCCCTTTGGTTGGGTATTGGTGAACATTACCTATTGATAAATCCCTAACTTTAGGTCTTTTT

-----  
ATGATTGAAGTTTTTCTATTTGGAATCGTGTTAGGTCTAATTCCTGTTACTTTGGCTGGATTATTCGTAACCTGCATATTT  
ACAATATAGGCGTGGTGATCAATCGGACCTT-----  
ATGCCTACTATAACT-----  
AGTTATTTTGGTTTTTCTACTAGCGGCTTTAACGGTAACCTCAGCTCTATTTATTGGTCTGAGTAAGATA-----  
CGACTTATC-----

-----  
ATGGATATAGTAAGTCTCGCTTGGGCTGCTTTAATGGTAGTCTTTACTTTTTCCCTTTCACTCGTAGTATGGGGAAGAAG  
TGGACTC---ATGATTATTCGTTTCGCCGGAACCA-----GAAGTAAAA-----  
ATTTTGGTAGATAGGGATCACATAAAAACCTTCTTTTCGAGGAATGGGCCAGGCCGGGTCATTTCTCAAGAACACTAGCTAA  
AGGTCCTGACACTACCCTTGGATCTGGAACCTACATGCTGATGCTCACGATTTTCGATAGCCATAACAGTGATTTGGAGG  
AGATCTCTCGAAAAGTCTTTAGTGCCCATTTTCGGGCAACTCTCCATCATCTTTCTTTGGCTTAGTGGTATGTATTTCCAT  
GGTGCTCGTTTTTCTAATTATGAAGCATGGCTAAGTGATCCGACTCACATTGGACCAAGTGCCAGGTGGTTTTGGCCAAT  
AGTGGGCCAAGAAATATTGAATGGTGATGTGGGTGGGGGCTTCCGAGGAATACAAATAACCTCTGGTTTTTTTTCAGCTTT  
GGCGAGCATCCGGAATAACTAGTGAATTGCAACTCTATTGTACCGCAATTGGTGCATTGATCTTTGCAGCGTTAATGCTT  
TTTGCTGGTTGGTTTTATTATCATAAAGCTGCTCCAAAATTGGCTTGGTTTTCAAGATGTAGAATCTATGTTGAATCACCA  
TTTAGCGGGGCTACTAGGACTGGGGTCTCTCTTTGGGCGGGGCATCAAGTACATGTATCTTTACCGATTAACCAATTTTC  
TAAACGCTGGAGTAGATCCTAAAGAGATACCACTTCCCTCATGAATTTATCTTGAATCGGGATCTTTTGGCTCAACTTTAT  
CCCAGTTTTGCTGAGGGAGCAACTCCCTTTTTTACCTTGGATTGGTCAAAAATATTCAGACTTTTCTTACTTTTTCGTGGAGG  
ATTAGATCCAGTAACTGGGGGTCTATGGCTGACCGATATCGCACACCATCATTTAGCTATTGCAATTTCTTTTCCCTGATAG  
CGGGTCATATGTATAAAAATAACTGGGGCATTGGTCATGGCCTAAAAGATATTTTAGAAGCTCATAAAGGTCCATTTACG  
GGTCAGGGCCATAAAGGCCTATATGAAATCCTAACCAACATCATGGCATGCTCAATTATCTCTTAACTTAGCTATGTTAGG  
CTCTTTAACCATTATTGTAGCTCACCATATGTATTCTATGCCGCTTATCCGTATCTAGCTACTGACTATGGTACACAAC  
TGTCATTGTTACACACATCACATGTGGATTGGTGGATTTCTCATAGTTGGCGCTGCTGCGCATGCAGCCATTTTTATGGTA  
AGAGACTATGATCCTACTACTCGATAACAATGATCTATTAGATCGTGTCTTAGGCATCGCGATGCAATCATATCACATCT  
CAACTGGGCATGTATATTTCTAGGCTTTTACAGTTTTGGTTTTGTATATTCATAATGATACCATGAGCGCTTTGGGGCGTC  
CTCAAGATATGTTTTTCGATACCGCTATACAATTACAACCT---

GTCTTTGCTCAATGGATACAAAACACCCATGCTTTAGCACCCAGTGCAACCGCTCCGGGTGCAACAACAAGCACCAGTTT  
AACTTGGGGAGGCGGTGATTTAGTAGCAGTGGGTGGTAAAGTGGCTTTGTTACCTATTCCATTAGGAACTGCAGATTTTT  
TGGTACATCACATTCATGCATTTACGATTCATGTGACGGTATTAATACTTTTGAAGGGTGTCTATTTGCTCGTAGCTCC  
CGTTTTGATACCGGATAAAGCAAATCTTGGTTTTTCGTTTTCCCTTGTGATGGACCTGGAAGAGGGGGGACGTGTCAAGTCTC  
GGCTTGGGATCATGTCTTCTTAGGGCTATTCTGGATGTATAATGCAATTTCCGGTGGTTATATTCCATTTTCAGTTGGAAAA  
TGCAGTCAGATGTTTTGGGGCAGTATAAGTGATCAAGGGGTAGTAACTCATATCACGGGAGGAACTTTGCGCAGAGTTCC  
ATTACTATTAATGGGTGGCTCCGCGATTTCTTATGGGCACAGGCATCCCAAGTAATTCATCTTATGGTTCTTCATTATC  
GGCATATGGGCTTTTTCTTCTAGGTGCCCATTTTTGTATGGGCCTTTAGTTTAAATGTTTTCTATTC---

AGTGGACGTGGTTATTGGCAAGAACTTATTGAATCCATCGTTTTGGGCTCATAATAAATTAAGGTTGCTCCTGCTACTCA  
GCCGAGAGCCTTAAGCATTGTACAAGGACGTGCTGTAGGAGTAACCCATTACCTTCTGGGTGGAATTGCCACAACATGGG  
CGTTCTTCTTAGCAAGAATTATTGCAGTAGGA---

ATGGCATTAAAGATTTCCAAGGTTTAGCCAAGGCTTAGCTCAGGACCCCACTACTCGTCGTATTTGGTTTTGGTATTGCTAC  
CGCACATGACTTCGAGAGTCATGATGATATTACTGAGGAACGTCTTTATCAGAATATTTTTGCTTCTCACTTCGGGCAAT  
TAGCAATAATTTTTCTGTGGACTTCCGGAAATCTGTTTCATGTAGCTTGGCAAGGAAATTTGAGTCATGGGTACAGGAC  
CCTTTACATGTAAGACCTATTGCTCATGCAATTTGGGATCCTCATTTTGGTCAACCGGCTGTAGAAGCTTTTACTCGAGG  
GGGTGCTCTCGGCCAGTGAATATCGCTTATTCTGGTGTATTATCAGTGGTGGTATAACAATCGGTTTACGCACTAATGAAG  
ATCTTTATACTGGAGCTTTTTTCTATTATTTCTTTCTGCCATATCGTTAATAGCAGGTTGGTTACACCTACAACCGAAA  
TGGAAACCGAGTGTTCGTGGTTCAAAAATGCCGAATCTCGTCTCAATCATCATTTGTGAGGACTCTTCGGCGTAAGTTC  
CTTGGCTTGGACAGGGCATTTAGTACAC

Dioscorea  
CCGACCCTGCTACGAAAAAAGACGTTCACTTTTTTAAAATATCCTATATATGTAGGTGGGAACAGAGGAAGGGGACAGATT  
TATCCTGATGGAAGCAAAAGTAACAATACAGTCTATAATGCTACATCAGCAGGTATAGTAAGCAAAATAGTACGTAAAGA  
A---

AAGGGGGGATATGAAATAACCATAATTGATGCATCGGACGGACATCAGGTGGTTGATATTATACCTCGAGGACCAGA  
ACTTCTTGGTTTTCAGAGGGTGAATCCATCAAGCTTGTATCAACCATTAACAAGTAATCCAAATGTGGGGGGCTTTGGT  
CAGGGAGATGCAGAAATAGTCTTCAAGATCCATTACGCATCCAAGGTCTTTTGTCTTCTTGGCATCTGTGATTTTGGC  
ACAAAT

TTTTTGGTTCTT---AAAAAGAAACAATTTGAAAAGGTTCAATTGTACGAAATG---AATTTCT---  
ATGAGTAAAGTATATGATTGGTTTCGAGGAACGTCTCGAGATTTCAGGCGATTGCAGATGATATAACTAGTAAATATGTTCC  
TCCTCATGTTAACATATTTTTATTGTCTAGGAGGGATCACACTTACTTGTCTTTTAGTACAAGTAGCTACGGGTTTTGCTA  
TGACTTTTTACTATCGTCCAACCGTTACGGAAGCCTTTTCTCTGTTCAATACATAATGACTGAGGCCAACTTTGGCTGG  
TTAATCCGATCAGTTCATCGATGGTCGGCAAGTATGATGGTTCTAATGATGATCCTGCACGTATTTTCGTGTGTATCTCAC  
AGGTGGATTTAAAAAACCTCGCGAATTAACCTGGGGTTACAGGCGTGGTTTTGGCTGTATTGACTGCATCTTTTGGTGTAA  
CTGGTTATTCTTACCTCGGGACCAAATTGGTTATTGGGCCGTAAAAATTGTGACAGGTGTACCTGAAGCTATTCCTGTA  
ATAGGATCCCCTTTGGTAGAGTTATTACGTGGAAGTGCTAGTGTGGGGCAATCCACTTTGACTCGTTTTTATAGTTTTACA  
CACTTTTGTATTGCCTCTTCTTACTGCTGTATTTATGTTAATGCACCTTCTAATGATACGTAAGCAAGGTATTTTCAGGTC  
CTTTA-----  
AACAAAGAAACCTGATTTTAAATGATCCTGTATTGAGAGCTAAATTGGCCAAAGGAATGGGGCATAATTATTATGGAGAAC  
CTGCCTGGCCCAATGATCTTTTATATATTTTTCCAGTAGTAATTCTAGGTACTATTGCATGTAACGTAGGCTTAGCAGTT  
CTAGAACCGTCAATGATTGGTGAACCGGCGGATCCATTTGCAACTCCTTTGGAAATATTACCCGAATGGTACTTTTTTCC  
CGTATTTCAAATACTTCGGACAGTACCAAATAAGTTATTGGGTGTTCTTTTAAATGGTTTTAGTACCAATAGGATTATTGA  
CAGTGCCATTTTTGGAAAATGTGAATAAATTCAAAATCCATTTTCGTCTCCAGTAGCTACAACAGTTTTTTTTGATCGGT  
ACCGCAGTAGCTCTTTGGTTAGGTATTGGAGCAACATTACCTATTGATAAATCTTTAACTTTAGGTCTTTTTCAAATTGA  
TTCAACTTCAATCATGAAATACCGTGGCGTAGGTATC-----  
ATGATTGAAGTTTTTCTATTTGGAATCGTCTTAGGTCTAATTCCTATTACTTTGGCAGGATTATTTGTAACCTGCATATTT  
ACAATATAGACGCGGTGATCAGTTGGACCTT-----  
ATGCTTACTATAACT-----  
AGTTATTTTTGGTTTTCTGCTGGCTGCTTTAACTATAACCCCGGCTCTATTAATTAGTTTTGAACAAGATA-----  
CAACTTATT-----  
-----  
ATGGATATAGTAAGTCTCGCTTGGGCTGCTTTAATGGTGGTCTTTTCCCTTTTCCCTTTTCACTTGTAGTATGGGGAAGGAG  
TGGACTC---ATGATTATTCGTTCCACCGGAACCA-----GAAGTGAAA-----  
ATTGTTGTAGATAGGGATCCCATAAAAACGTCTTTTCGAGGAATGGGCCCGACCCGGCCATTTCTCAAGAACAATAGCTAA  
GGGCCCGGATACACTACCCTTGGATCTGGAACCTACATGCCGATGCTCACGATTTTCGATAGTCAACCAGTGATTTGGAAG  
AGATTTCTCGAAAAGTATTTAGTGTCTCATTTCGGTCAACTCTCCATTATCTTTCTTTGGCTGAGTGGCATGTATTTCCAT  
GGTGCCCGTTTTTCCAATTTATGAAGCATGGCTAAGTGATCCTACTCATATTGGACCCAGTGCAGGTGGTTTTGGCCAAT  
AGTAGGTCGAAGAAATTTGAATGGTGTATGTGGGCGGGGTTTTCCGGGGAATACAAATAACTTCCGGTTTTTTTTCAGATTT  
GGCGAGCATCTGGAATAACTAGTGAATTACAACCTCTATTGTAAGTGAATTTGGTGGATTGGTCTTTGCATCGTTAATGCTT  
TTTGCCGGTTGGTTCCATTATCACAAAGCCGCCCAAAATTTGGCTTGGTTCCAAGATGTGGAATCTATGTTGAATCACCA  
CTTAGCAGGGTTACTAGGGCTTGGGTCTCTTTCTTGGGCGGGGCACCAAATCCATGTATCTTTACCGATTAACCAATTTTC  
TCGACGCTGGAGTTGATCCTAAAGAAATACCCTTCTCATGAATTTATCTTGAATCGGGATCTTTTGGTTCAACTTTAT  
CCCAGTTTTTGGCGAGGGAGCAACCCCTTTTTTACCTTGAATTGGTCAAAATACGCAGAATTTCTGAGTTTTCTGGGGG  
ATTAGATCCAATAACAGGGGCTGTGGCTGAGCGATATAGCACACCATCATTAGCTATTGCAATTTCTTTTCCCTGATCG  
CCGGTCATATGTATAGGACCAACTGGGGTATTGGTCATGGCCTTAAAGACATTTTAGAAGCCCATAAAGGTCCATTTACA  
GGCCAGGGTCATAAGGGTCTTTATGAAATCCTAACAACATCATGGCATGCTCAATTATCTCTTAACTGGCTATGTTAGG  
TTCTTTAACAATTGTTGTAGCTCACCATATGTATTCCATGCCCCCTATCCATACCTAGCTATTGACTATGGTACACAAC  
TTTTCTTGTTCACACATCACATGTGGATCGGTGGATTTCTCATAGTTGGTGTGCTGCACATGCAGCCATTTTTATGGTA  
AGAGACTACGATCCAACTACTCGATACAACGATCTATTAGATCGTGTCTTAGGCACCGTGATGCAATCATATCACATCT  
TAATTGGGCATGTATATTTTTAGGGTTTACAGTTTTGGCTTATATATTCATAACGATACCATGAGCGCTTTAGGTGCTC  
CCCAAGATATGTTTTAGATACCGCTATACAACCTACAACC---  
GTCTTTGCTCAATGGGTACAAAACACCCATGCTTTAGCGCCGGGTGTAACAGCTCCTGGTGCAACAACAAGTACCAGCTT  
AACTTGGGGAGGTGATCAATTAGTAGCAGTAGGTGGCAAAGTAGCTTTGTTACCTATTCCATTAGGAACCGCAGATTTTT  
TGGTCCATCACATTCATGCATTTACAATCCATGTGACTGTATTGATACTACTGAAAGGCGTTCTATTGTCTCGCAGTTCC  
CGTTTTGATACCTGATAAAGCAAATCTTGGTTTTTCGTTTTCCCTGTGATGGCCCTGGAAGAGGAGGAACATGTCAAGTATC  
CGCCTGGGATCATATCTTCTTAGGTCTATTCTGGATGTACAATGCAATTTTCGGTAGTAATTTTCCATTTTATGTTGAAAA  
TGCAGTCAGATGTTTTGGGGTACTATAAGCGATCAAGGAGTGGTAACCCATATCACAGGAGGAACTTTGCACAGAGTTCC  
ATTACTATTAATGGGTGGTTACGGGATTTCTTATGGGCACAGGCATCTCAGGTAATTCAGTCTTATGGTTCTTTCATTATC  
TGCATATGGTCTTTTTTCTTAGGTGCTCATTTTGTCTGGGCTTTTCAGTTTAAATGTTTCTATTC---  
AGCGGCCGTGGTTATTGGCAAGAACTCATTGAATCCATCATTGGGCTCATAACAAATTTAAAGTTGCTCCTGCTACTCA  
GCCTAGAGCCTTGAGTATCGTACAAGGACGCGCTGTAGGAGTAACCCATTACCTTCTGGGTGGAATTGCCACAACATGGG  
CATTCTTCTTAGCAAGAATTATTGCAGTAGGA---  
ATGGCATTAAAGATTTCCAAGGTTTAGCCAAGGCTTAGCTCAGGACCCCACTACTCGTCTGATTTGGTTTTGGTATTGCTAC  
TGCACATGACTTCGAGAGTCATGATGATATTACTGAGGAACGTCTTTATCAGAACATTTTTGCTTCTCATTTTGGGCAGT  
TAGCAATAATTTTTCTGTGGACGTCCGGAATCTGTTTCATGTAGCTTGGCAAGGAAATTTTGGTTCATGGATACAGGAC



CCCTTACATGTAAGACCTATTGCTCATGCAATTTGGGATCCTCATTGTTGGTCAACCCGCTGTAGAGGCCTTTACTCGAGG  
AGGTGCTATCGGCCCGTGAATATTGCTTATTCCGGTGTGTTATCAGTGGTGGTATAACAATCGGATTACGCACCAATGAAG  
ATCTTTATACTGGAGCTCTTTTTCTATTATGTCTTTCTGCTATATCTTTAATAGCAGGTTGGTTACACCTACAACCCAAA  
TGGAAACCCAGCCTTTTCGTGGTTTTAAAAATGCCGAATCTCGCCTCAATCATCATTTGTCAGGACTTTTCGGAGTAAGTTC  
CTTGGCTTGGGCAGGACATTTAGTTCAT

Drimys

CGGACCCTGCTACTAAGAAAGACGTTAACTTCTTAAAATATCCCATATACGTAGGTGGGAACAGGGGAAGGGGTGAGATT  
TATCCCGATGGGAGCAAGAGTAACAATACAGTCTATAATGCTACAGGAGCAGGTATAGTAAGCAGAATAGTACGTAAAGA  
A---

AAAGGGGGGTATGAAATAACCATAGCTGATGCATCGGATGGACACCAAGTAATTGATATTATACCTCCAGGACCAGA  
ACTTCTTGTGTTTTCAGAGGGTGAATCTATCAAGCTTGTATCAACCATTAACGAATAATCCTAATGTGGGTGGATTGGT  
CAGGGAGATGCAGAAATAGTACTTCAAGATCCATTACGTGTCCAAGGGTGTGTTCTTTTTGGCATCTGTTATTCTGGC  
ACAAATCTTTTTGGTTCTT---AAAAAGAAACAGTTTGAGAAGGTTCAATTGTCCGAAATG---AATTTT-----

AAAGTATATGATTGGTTCGAGGAGCGTCTAGAGATTACAGGCGATTGCGGATGATATAACTAGTAAATATGTTCCCTCCTCA  
TGTC AACATATTTTATTGCCTAGGGGGGATTACACTTACTTGTGTTTTTAGTACAAGTAGCTACAGGTTTTGCTATGACTT  
TTTACTATCGTCCGACC GTTACAGAGGCCTTTGCCTCTGTTCAATACATAATGACTGAAGCCAAC TTTGGTTGGTTAATC  
CGATCAGTTACCCGATGGTCAGCAAGTATGATGGTCTAATGATGATCCTGCACGTATTTTCGTGTGTATCTTACAGGTGG  
ATTTAAAAAACCTCGTGAATTAAC TTTGGGTTACGGGTGTGGTTCTAGCTGTATTGACTGCATCTTTTGGTGTAACTGGTT  
ATTCTTACCTCGGGACCAATTTGGTTATTGGGCAGTCAAAATCGTGACAGGCGTACCTGACGCTATTCTGTAAATAGGA  
TCGCCTTTGGTAGAGTTATTACGTGGAAGTGTAGTGTGGGTCAATCCACTTTGACCCGTTTTTATAGTTTTACACACTTT  
TGTATTACCTCTTCTTACTGCCGATTTTATGTTAATGCACCTCCCAATGATACGTAAGCAAGGTATTTTACAGTCTTTA-

-----  
AACAAAGAAACCTGACTTGAATGATCCTGTATTAAGAGCTAAATTTGGCTAAAGGGATGGGGCATAATTATTATGGCGAAC  
CTGCATGGCCCAACGATCTTTTATATATTTTTCCAGTAGTAATTCTAGGTACTATTGCATGTAACGTAGGCCTAGCAGTT  
CTAGAACCGTCAATGATTGGTGAACCGGCGGATCCATTTGCAACGCCTTTGGAAATATTACCTGAATGGTACTTCTTTCC  
CGTATTTCAAATCCTCCGTACAGTACCCAATAAGTTATTGGGTGTTCTTTTAAATGGTTTTAGTGCACACGGGATTATTGA  
CAGTACCCTTTTTGGAGAATGTTAATAAAATCCAAAATCCATTTTCGTGTCAGTGGCTACAACAGTCTTTTTGATCGGT  
ACCGCAGTAGCTCTTTGGTTAGGTATTGGAGCAACATTACCTATTGATAAAATCTCTAACTTTAGGTCTTTTTCAAATTGA  
T-----

ATGATTGAAGTTTTTTCTATTTGGAATCGTCTTAGGTCTAATTCCTATTACTTTGGCCGGATTATTCGTAACCTGCATATTT  
ACAATACAGACGCGGAGATCAGTTGGACCTT-----  
ATGCCTACTATAACT-----  
AGTTATTTTCGGTTTTTCTACTAGCTGCTTCAACTATAACCCCAGCTCTATTGATGGGTCTGAGCAAGATA-----  
CGACTTATT-----

-----  
ATGGATATAGTAAGTCTCGCTTGGGCTGTTTTAATGGTAGTCTTTACATTCTCCCTTTCACTCGTAGTATGGGGAAGAAG  
TGGACTC---ATGATTATTCGTTTCGCCGGAACCA-----GAAGTGAAG-----

ATTTTGGTGGATAGGGATCCCGTAAAACTTCTTTTCGAGGAATGGGCCAGACCCGGCCATTTCTCAAGAACAATAGCTAA  
AGGCCCTGAGACTACCACTTGGATCTGGAACCTTACATGCCGATGCTCACGATTTTCGATAGCCATACCAGTGATTTGGAGG  
AGATCTCTCGAAAAGTATTTAGTGCTCATTTCGGTCAACTCTCCATCATCTTTCTTTGGCTGAGTGGTATGTACTTCCAT  
GGCGCCCGTTTTTCCAATTATGAAGCGTGGCTAAGCGATCCTACTCACATCGGACCCAGCGCCAGGTGGTTTTGGCCAAT  
AGTGGGTCAAGAAATATTGAATGGTGTATGTGGGGGGTGGTTTTCCGAGGAATACAAATAACCTCTGGTTTTTTTCAGATTT  
GGCGAGCGTCTGGAATAACTAGTGAATTACAACCTTATTGCACCGCAATTTGGTGCCTTGGTCTTTGCAGGGTTAATGCTT  
TTTGCTGGTTGGTTCCATTATCACAAGCTGCTCCAAAATTTGGCTTGGTTCCAAGATGTAGAATCTATGTTGAATCACCA  
CTTAGCGGGGTTACTAGGACTTGGGTCTCTTTCTTGGGCGGGACACCAAGTACATGTATCTTTACCGATTAACCAATTTCT  
TAGACGCTGGAGTGGATCCTAAAGAGATAACCACTTCTCATGAGTTTATCTTGAATCGGGATCTTTTGGCTCAACTTTAT  
CCCAGTTTTGCGGAGGGAGCAACCCATTTTTTACCTTGAATTTGGTCAAAATACCGGAAATTTCTTACTTTTTCGTGGAGG  
ATTAGATCCTGTAAACAGGGGTCTATGGCTGACCGATATTGCACATCATCATTTAGCTATTGCAATTTCTTTTCTGATAG  
CTGGTCACATGTATAGGACCAACTGGGGCATTGGTCATGGTCTGAAAGATATTTTAGAGGCTCATAAAGGGCCATTTACA  
GGCCAGGGTCATAAAGGCCTCTATGAGATCCTAACAACGTCATGGCATGCTCAATTATCTCTTAACTAGCTATGTTAGG  
TTCTTTAACCATTGTTGTAGCTCACCATATGTATTCCATGCCCCCTTATCCATACCTAGCTATTGACTATGGTACACAAC  
TTTCGTTGTTTACACATCACATGTGGATCGGTGGATTTCTCATAGTTGGTGTGCTGCTGCACATGCAGCCATTTTTATGGTA  
AGAGACTATGATCCAACCTACTCGATAACAACGATCTATTAGACCGTGTCTTAGGCACCGAGATGCAATCATATCACATCT  
CAACTGGGCATGTATATTTCTAGGCTTTTACAGTTTTGGCTTGTATATTCATAATGATACCATGAGCGCTTTAGGGCGTC  
CCCAAGATATGTTTTTCAGATACCGCTATAACAATTACAACC---

ATCTTTGCTCAATGGGTACAAAACACCCACGCTTTAGCGCCCGGTGCAACAGCTCCTGGTGAACAACAAGCACCAGCTT  
GACTTGGGGGGTGGTGAATTAATAGCAGTAGGCGGCAAAGTCGCTTTGTTACCTATTCCATTAGGAACCGCAGATTTTT

TGGTACATCACATTCATGCATTTACGATCCATGTGACTGTATTGATACTACTGAAAGGTGTTCTATTTGCCCGTAGCTCA  
CGTTTTGATACCTGATAAAGCAAATCTTGGTTTTTCGTTTTCCCTTGTGACGGACCTGGAAGAGGGGGGACATGCCAAGTATC  
TGCCTGGGATCATGTCTTCTTAGGCCTATTCTGGATGTACAATGCAATTTCCGGTAGTCATATTCATTTTCAGTTGGAAAA  
TGCAGTCAGATGTTTTGGGGTAGTATAAGTGATCAAGGGGTGGTAACTCATATCACGGGAGGAAACTTTGCACAGAGTTCC  
ATTACTATTAATGGGTGGCTCCGGGATTTTTTATGGGCACAAGCATCTCAGGTAATTCAGTCTTATGGTTCTTCATTATC  
TGCATATGGCCTTTTTTTCCTAGGTGCTCATTGTTGCTGGGCTTTTAGTTTTAATGTTTTCTATTC---  
AGCGGCCCGTGGTTATTGGCAAGAACTCATTGAATCCATCGTTTTGGGCTCATAACAAATTTAAAGTTGCTCCTGCTACTCA  
GCCTAGAGCCTTGAGCATTGTACAAGGACGCGCTGTAGGAGTAACCCATTACCTTCTGGGTGGAATTGCCACAACATGGG  
CATTCTTCTTAGCAAGAATTATTGCAGTAGGA---  
ATGGCATTAAAGATTTCCAAGGTTTAGCCAAGGCTTAGCTCAGGACCCACTACTCGTCGTATTTGGTTTTGGTATTGCTAC  
CGCACATGATTTTCGAGAGTCATGATGATATTACTGAAGAACGTCTTTATCAGAACATTTTTGCTTCTCACTTCGGGCAGT  
TAGCAATAATCTTTCTGTGGACTTCCGGAAATCTGTTTCATGTAGCTTGGCAAGGAAATTTGAGTCATGGGTACAGGAC  
CCTTTACATGTAAGACCTATTGCTCATGCAATTTGGGATCCTCATTGTTGGTCAACCAGCTGTAGAAGCCTTTACTCGAGG  
GGGTGCTCTCGGCCAGTGAATATCGCTTATTCCGGTGTGTTATCAGTGGTGGTATAACAATTGGCTTACGCACCAATGAGG  
ATCTTTATACTGGAGCTCTTTTTCTATTATTTCTTTCTGCCATATCCTTAATAGCGGGTTGGTTACACCTACAACCCAAA  
TGGAAACCAAGCGTTTTCTGGTTCAAAATGCCGAATCTCGTCTCAATCATCATTGTCAGGACTCTTCGGAGTAAGTTC  
CTTGGCTTGGACAGGACATTTAGTTCAT

Eucalyptus

CGGACCCCGCTACTAATAAAGATGTTCACTTCTTAAAATATCCCATATATGTAGGCGGGAACAGAGGAAGGGGTGAGATT  
TATCCCGATGGGAGCAAGAGTAACAATACAGTTTATAATGCTACAGCGGCTGGTGTAGTAAGTAAAATCATACGAAAAGA  
A---

AAAGGGGGGTACGAAATAACCATATCGGATGCGTCAGATGAACGTCAAGTGGTTGATATTATCCACCAGGGCCAGA  
TCTTGTTCGGAAGGCGAATCTATCAAACCTTGATCAGCCATTAACGAGTAATCCTAATGTGGGTGGATTTGGTCAAGGAG  
ATGCGGAAATAGTACTTCAAGATCCATTCCGTGTCCAAGGCCTTTTGTCTTCTTGGCATCTGTTATTTGGCACAATA  
TTTTTGGTTCTT---AAGAAGAAACAGTTTGAAGAAGGTTCAATTGTCCGAAATG---AATTTCT---

ATGAGTAAAGTCTATGATTGGTTTTGAAGAACGTCTCGAGATTACAGGCGATTGCAGATGATATAACTAGTAAATATGTTCC  
TCCTCATGTCAACATATTTTATTGTCTAGGAGGAATTACGCTTACTTGTTTTTTAGTACAAGTAGCTACGGGGTTTGCTA  
TGACTTTTTACTACCGTCCAACCTGTTACTGAGGCTTTTGTCTTCTGTTCAATACATAATGACTGAAGCTAACTTTGGTTGG  
TTAATTCGATCAGTTCATCGATGGTCCGGCAAGTATGATGGTCTAATGATGATCCTGCACGTAAATTCGTGTGTATCTCAC  
TGGTGGTTTTAAAAAACCTCGCGAATTAACCTGGGTTACAGGTGTGGTTCTGGCTGTATTGACCCCATCCTTTGGTGTAA  
CTGGTTATTCTGTTACCTTGGGACCAAATTGGTTATTGGGCAGTCAAAATTGTAACAGGTGTGCCGGAAGCTATTCTGT  
ATAGGATCCCTTTAGTAGAGTTATTACGCGGAAGTGCTAGTGTGGGACAATCCACTTTGACTCGTTTTTATAGTTTTACA  
CACTTTTGTATTACCTCTTCTTACTGCCGTGTTTATGTTAATGCATTTTTCTAATGATACGTAAGCAAGGTATTTCCGGTC  
CTTTA---

ATGGGAGTAACAAAAAACCTGACTTAAATGATCCTGTATTAAGAGCTAAATTTGGCTAAAGGGATGGGTGATAATTATTA  
CGGAGAACCCCGCATGGCCCAACGATCTTTTATATATTTTTCCAGTAGTAATTTTAGGTAATTTGCGTGTAAACGTAGGCT  
TAGCGGTTCTAGAACCATCAATGATTGGTGAACCCGCCGATCCATTTGCAACTCCTTTGGAAATATTACCCGAATGGTAT  
TTCTTTCCCGTATTTCAAATACTTCGGACAGTACCTAATAAGTTATTGGGTGTTCTTTTAAATGGTTTTAGTACCTGCGGG  
ATTATTAACAGTACCTTTTTTGGAGAATGTTAATAAATTTCAAATCCATTTGCTCGTCCAGTAGCGACAACCTGTCTTTT  
TGATTGGTACCGTAGTGGCCCTTTGGTTGGGTATTGGAGCAACATTACCTATTGATAAATCCCTAACTTTAGGTCTTTTT  
-----

ATGATTGAAGTTTTTCTATTTGGAATTGTCTTAGGTCTAATTCCTATTACTTTAGCTGGATTATTTGTAAGTGCATATTT  
ACAATACAGACGTGGTGATCAGTTGGATCTT-----

ATGCTTACTATAACT-----

AGTTATTTCCGTTTTCTACTAGCAGCTTTAACTATAACCTCAGCTCTCTTTATTGGTCTGACCAAGATA-----

CGACTTATT-----

ATGGATATAGTAAGTCTTGCTTGGGCTGCTTTAATGGTAGTCTTTACATTTTCTCTTTCACTCGTAGTATGGGGAAGAAG  
TGGACTC---ATGATTATTCGTTCCGCCGAACCA-----GAAGTCAAA-----

ATTTTGGTAGATAGGGATCCCATAAAAACCTTCTTTTCGAGGAATGGGCCAAACCGGGTCATTTCTCAAGAACAATAGCTAA  
GGGCCCTGATACTACCCTTGGATCTGGAACCTACATGCTGATGCTCACGATTTTCGATAGCCATACCAATGATTTGGAGG  
AGATCTCTCGAAAAGTATTTAGTGCTCATTGTTGGCCAACCTTTCCATTATCTTTCTTTGGCTGAGTGGCATGTATTTCCAT  
GGTGTCTGTTTTTCCAATTATGAAGCATGGCTAAGTGACCCTACTCACATTGGACCTAGTGCCAGGTGGTTTTGGCCAAT  
AGTGGGCCAAGAAATATTGAATGGCGATGTGGGCGGGGTTCCGAGGAATACAAATAACCTCTGGTTTTTTTTTCAGATTT  
GGCGAGCATCGGGAATAACTAGTGAATTACAACCTTATTGTACCGCAATTGGTGCATTAGTCTTTGCAGCCTTAATGCTT  
TTTGTGTTGGTTCCATTATCACAAGCTGCTCCAAAATTTGGCCTGGTTCCAAGATGTAGAATCTATGTTGAATCACCA  
TTTAGCAGGGCTACTAGGACTTGGGTCTCTTTCTTGGGCGGGGCATCAAGTACATGTATCTTTACCAATTAACCAATTTT

TAAACGCTGGAGTAGATCCTAAAGAGATCCCACCTTCCTCATGAATTTATCTTGAATCGGGATCTTTTGGCTCAACTTTAT  
CCCAGTTTTGGCGAGGGAGCAACCCCATTTTTTACCTTGAATTGGTCAAATATGCGGAATTTCTTACTTTTCGTGGCGG  
ATTAGATCCAGTAACTGGGGTCTATGGCTAACTGATATTGCTCATCATCATTTAGCTATTGCAATTTCTTTCTTGATAG  
CAGGTCACATGTATAGGACCAACTGGGGCATTGGTCATGGCATAAAAGATATTTTAGAGGCTCATAAAGGTCCATTTACA  
GGCCAGGGCCATAAAGGCCTATACGAGATCCTAACAACGTCATGGCATGCTCAATTATCTCTTAACCTAGCTATGTTAGG  
CTCTTTAACCATTGTTGTAGCTCACCATATGTATTCCATGCCCCCTTATCCATATCTAGCTACTGACTATGGTACACAAC  
TGTCATTGTTACACATCACATGTGGATTGGCGGGTTTCTCATAGTTGGTGCTGCCGCGCATGCAGCTATTTTTATGGTA  
AGAGATTATGATCCAACCTACTCGATAACAACGATCTATTAGATCGTGTCTTAGGCATCGTGATGCAATCATATCACATCT  
CAACTGGGTATGTATATTTCTAGGCTTTCACAGTTTTGGTTTTGTATATTATAATGATACCATGAGCGCTTTAGGGCGAC  
CCCAAGATATGTTTTCTGATACCGCTATAACAATTACAACC---

GTCTTTGCTCAATGGATACAAAACCCATGCTTTGGCGCCTGCTGCAACCGCCCCTGGTGCAACAGCAAGCACCAGTTT  
GACTTGGGGAGGTGGTGATTTAGTGGCAGTAGGTGGCAAGGTTGCTTTATTACCTATTCCATTAGGAACCGCAGATTTTT  
TGGTACATCACATTCATGCATTTACGATTCATGTAACAGTATTGATACTCCTGAAAGGTGTTCTATTTGCTCGTAGCTCT  
CGTTTTGATACCGGATAAAGCAAATCTTGGTTTTCGTTTTCCCTTGTGATGGACCTGGAAGAGGGGGGACATGCCAAGTATC  
CGCTTGGGATCATGTCTTCTTAGGCCTATTCTGGATGTACAATGCAATCTCGGTAGTCATATTTTCAATTTAGTTGGAAAA  
TGCAGTCAGATGTTTGGGGTAGTATAAGTGATCAAGGAGTGGTAACTCATATCACGGGAGGAAACTTTGCGCAGAGTTCC  
ATCACTATTAATGGGTGGCTCCGCGATTTCTTATGGGCACAGGCATCCCAAGTAATTCAGTCTTATGGTTCTTCAATTATC  
TGCATATGGCCTTTTTTCTAGGTGCTCATTGTTGATGGGCTTTTAGTTTTAATGTTTCTATTC---

AGCGGGCGTGGTTATTGGCAAGAACTTATTGAATCCATCGTTTTGGGCTCATAATAAATTTAAAGTTGCTCCTGCTACTCA  
GCCTAGAGCCTTGAGCATTGTACAAGGACGTGCTGTAGGAGTAACCCATTACCTTCTGGGTGGAATTGCCACAACATGGG  
CGTTCTTCTTAGCAAGAATTATTGCAGTAGGA---

ATGGCATTAAAGATTTCCAAGGTTTAGCCAAGGCTTAGCTCAGGACCCCACTACTCGTTCGATTTGGTTTTGGTATTGCGAC  
CGCGCATGACTTTGAGAGTCATGATGATATTACTGAGGAACGCTTTTATCAGAATATTTTTGCTTCTCACTTCGGGCAAT  
TAGCAATAATTTTTCTATGGACTTCCGGAAATCTGTTTCATGTAGCTTGGCAAGGAAATTTGAGGCATGGGTACAGGAC  
CCCTTACATGTAAGACCTATTGCTCATGCAATTTGGGATCCTCATTGTTGGTCAACCGGCCGTGGAAGCTTTTACTCGAGG  
GGGTGCTCTTGGCCCAGTGAATATCGCTTATTCTGGTGTGTTATCAGTGGTGGTATAACAATGGTTTTACGTACTAATGAAG  
ATCTTTATACGGGAGCCCTTTTTCTATTATTTCTTTCTGCCATATCCTTAATAGCAGGTTGGTTACACCTACAACCGAAA  
TGGAAACCGAGCGTTTCGTGGTTCAAAAATGCCGAATCTCGTCTCAATCATCATTTGTCAGGACTATTCCGGTGAAGTTC  
TTTTGGCTTGGACAGGGCATTTAGTACAT

Ginkgo

CGAATCCTGCTACTAATAAAGAAGCTCACTTCCTTAAATATCCCATCTATGTGGGTGGTAATAGAGGAAGAGGACAAATT  
TATCCCGACGGGAGCAAGAGCAACAATACAGTCTATAATGCTTCAGCAACAGGTAGAGTAAGCAAAATCCTACGTAAAGA  
A---

AAGGGTGGATATGAAATCACTATTGAGAATACATCAGATGGTCATCAAGTGGTCGATATTGTACCTCCGGGACCGGAACT  
TCTCGTTTTCAGAAGGCGAATTCATCAAGGTTGATCAGCCGCTAACGAATAATCCTAATGTAGGTGGATTTGGCCAGGGAG  
ATGCAGAAATAGTACTTCAAGATCCATTACGTGTTCAAGGTCTTTTATTCTTCTGGCATCTGTTATTTTGGCACAGGTA  
TTTTCTGGTCCTT---AAAAAGAAACAATTTGAGAAGGTTCAATTGGTCGAGATG---AATCTT---

ATGGGTAAAGTATACGATTGGTTTCAAGAGCGTCTCGAGATTGAGGCGATTGCGGATGATATAACTAGTAAATATGTTCC  
TCCTCATGTCAATCTATTTTATTGTCTGGGGGAGTCACTGACCTGTTTTTTGGTACAAGTAGCTACTGGTTTTGCTA  
TGACTTTTTACTATCGTCCGACCGTTACAGAAGCTTTTCGCTCTGTTCAATACATAATGATCGAAGTAAACTTTGGTTGG  
CTAATTCGATCAGTCCATCGATGGTTCGGCAAGTATGATGGTTCTAATGATGATCCTGCACGATTCCTGTTTATCTCAC  
AGGTGGGTTTTAAAAACCTCGTGAATTAACCTGGGTTACAGGTGTCATTCTGGCTGTACTGACCGTATCTTTCCGGTGTA  
CTGGTTATTCTTGGCCCTGGGATCAAATGGTTATTGGGCAGTAAAAATTGTGACCGGTGTGCCTGAGGCTATTCTCTGTG  
ATAGGATCTCCTTTGGTAGAGTTATTGCGCGGAAGTATTAGTGTGGGTCAATCCACCTTGACTCGTTTTTATAGTTTACA  
CACTTTCTGATTACCCCTTCTTACTGCTGTATTTATGTTAATGCACCTTCTAATGATCCGTAAGCAAGGTATTCCAGGTC  
CTTTA---

ATGGGAGTGACGAAGAAACCTGACTTAAATGATCCTGTATTAAGAGCTAAATTAGCTAAGGGTATGGGACATAATTTCTTA  
TGGAGAACCTGCTTGGCCTAACGATCTTTTATATATTTTTCCAGTAGTAATTTAGGTAATTTAGGTAATTTAGGTAATTTAGGTA  
TAGCGGTTCTAGAACCATCAATGATTGGTGAACCAGCAGATCCATTTGCAACTCCTTCGGAAATATCGCCCGAATGGTAT  
TTTTTCCCGTATTCCAAATACTTCGTACAGTACCTAATAAATTATTGGGTGTCCTTCTAATGGCCTCAGTACCCGCGGG  
ATTATTGACGGTACCTTTTTTCGGAGAATGTTAATCAATTTCAAATCCATTTTCGTGTCAGTAGCCACAATAGTATTCT  
TAATCGGTAATGCAGTAGCCCTTTGGTTAGGTATTGGAGCAGCGTTACCTATCGATGAATCTTTAACTTTAGGTCTTTTC  
CAAATTGATTTCACTGTCAAATATCGAAAGATTTCAATCTTTCTGTTTATATATGATTGAAGCTTTGCCATCCGGAATTGT  
GTTAGGTCTAATTCCTATCACTTTGGCCGGATTATTCTGTAACCTGCGTATTTACAATACCGACGTGGTGATCAATTGGATA  
TT-----ACGCCTACTATAACT-----

AGTTATTTCCGGTTTTCTATTGGCTTCTTTCAATTTCAACCTTAGCCTTATTTATTGGTTTTGAGCAGGATA-----  
CGACTTATT-----

-----  
ATGGATATAATCAGTATCGCCTGGGCTGCTCTAATGGTAGTTTTTACATTTTCTCTTTCACTCGTAGTATGGGGAAGAAG  
TGGACTA---ATGATTATTCGTTCCACCGGAACCA-----GAGGTCAAG-----  
ATCGTGGTGGAGAGGGATCCTATAAAAACCTCTTTTGGAGAAATGGGCCAAACCTGGTCATTTCTCAAGGACGCTAGCTAA  
GGGACCTAATACTACCACCTGGATCTGGAACCTACATGCTGATGCTCACGATTTTGATAGCCATACCAATGATTTGGAAG  
AGATCTCTCGCAAAGTATTTAGCGCTCATTTCGGTCAACTAGCCATCATATTGATTTGGCTAAGTGGGATGTACTTCCAT  
GGCGCTCGTTTTCTCCAATTATGAAGCATGGCTGAGTGATCCTACTCGCATCAAACCCAGTGCTCAGGTGGTTTTGGCCGAT  
AGTAGGTCAAGAAATCTTGAATGGGGATGTAGGTGGGGTTTTTCGAGGAATACAAATAACCTCTGGTTTTTTTTCAAATTT  
GGCGAGCATCTGGAATAACTAGTGAATTACAACCTTACTGCACCGCAATTGGTGCATTGATCTTTGCAGCTTTAATGCTT  
TTTAGCAGGGTTACTAGGACTTGGGTCTCTATCTTGGGCAGGACACCAAGTACACGTCTCTTTACCCATTAATCAACTCC  
TAGATGCTGGAGTGGATCCCAAGGAGATACCACCTTCTCATGAATTTATTTCAAATCGCGATCTTGTAGCTCAACTTTAT  
CCTAGTTTTGCTAAGGGATTAACCCATTTTTTGGCCCTGAATTGGTCGGAATATTCAGAATTTTTGACCTTTTCGTGGAGG  
ACTAAATCCAGTAACGGGGGCTGTGGCTGACCGATACTGCGCATCATCATTGGCTATTGCAATTTCTTTTCTGATAG  
CTGGTCATATGTATAGGACCAATTGGGGCATTGGCCATAGCCTCAAAGAAATTTTGGAAAGCTCATAAAGGTCCGTTTTACG  
GGTGAGGGTCATAAAGGTATTTACGAGATCTTAACTACCTCATGGCATGCTCAATTAGCTCTTAACTAGCTATGTTAGG  
CTCTTTAACTATTGTCTGATGCTCACCACATGTATTTCGATGCCCCCTTATCCATACCTAGCTATTGACTACGGTACCCAAC  
TCTCTCTGTTTACACATCACATGTGGATCGGGGGTTTTCTTATAGTTGGCGCTGCTGCACATGCAGCCATTTTTATGGTA  
AGGGACTACGATCCAATTTCAATATAACAATCTATTAGATCGTGTCTTAGACATCGTGATGCGATCGTATCACACCT  
CAACTGGGCATGTATATTCTTAGGCTTTCATAGTTTTGGTCTGTATATTATAATGATACTATGAGCGCTTTAGGACGTC  
CTCAAGATATGTTTTAGATACTGCCATACAATTACAACCT---

Glycine

CGGATCCCCTACTAAGAGAGATGTTTCTTAAAATATCCTATATACGTAGGTGGGAACAGGGGAAGGGGTGAGATT  
TATCTTGACGGGAGCAAGAGTAATAATAATGTGTATAATGCTACAGCAGCGGGTATGGTAAAAAAATCATACGAAAAGA  
A---  
AAAGGGGATACGAAATAACTATAGTGGATGCATTGGATGGGCGTGAAGTGATTGATATTATACCTCCAGGACCAGA  
TCTTGTTCAGAAAGTGAATCTATCAAACCTGATCAGCCATTAACAAGTAATCCAAATGTGGGTGGATTTGGTCAGGGGG  
ATGCGGAAATAGTACTTCAAGATCCGTTACGTGTCCAAGGTCTCTTGTCTCTTTCGCATCTATTATTTAGCACAAATC  
TTTTTAGTTCTT---AAGAAGAAACAATTTGAGAAGGTTCAATTGTCCGAAATG---AATTTCT---  
ATGAGTAAAGTCTATGATTGGTTGGAAGAAGCTTGAATTCAGGCGATTGCCGATGATATAACCAGTAAATATGTTCC  
GCCTCATGTGAATATATTTTATTGTTTAGGAGGAATTACACTTACTTGTTTTTTAGTCCAAGTAGCAACGGGATTTGCTA  
TGACTTTTTATTATCGTCCGACCGTTACTGAAGCTTTTGCTTCTGTTCAATATATAATGACTGAAGCTAACTTTGGTTGG  
TTAATCCGATCCGTTTCATCGATGGTCCGCAAGTATGATGGTCTTAATGATGATCCTACACGATTTTCGTGTGTATCTCAC  
AGGCGGTTTTAAAAAACCTCGCGAATTAACCTGGGTTACGGGTGTAGTTTTGGCTGTATTGACTGCATCTTTTGGTGTAA  
CCGTTTATTCCTTACCTTGGGATCAAATGGTTATTGGGCAGTCAAATTTGTAACAGGCGTACCCGACGCTATTCTGTGA  
ATAGGATCGTCTTTGGTAGAGTTATTACGCGGAAGTCCAGTGTGGGACAATCTACCTTAACTCGTTTTTATAGTTTGGCA  
TACTTTTTGTATTACCTCTTCTTACTGCTGTATTTATGTTAATGCATTTTTCAATGATACGTAAGCAAGGCATTTCTGGTC  
CTTTA---

ATGGGAGTAACAAAAAACCTGACTTGAATGATCCTGTATTAAGAGCTAAATTGGCTAAGGGAATGGGTCATAATTATTA  
TGGAGAACCTGCATGGCCCAACGATCTTTTATATATTTTTCCAGTAGTAATTCTAGGTACTATTGCCTGTAACGTAGGCT  
TAGCGGTTCTAGAACCATCCATGATTGGGGAACCCGCGGATCCATTTGCAACTCCTTTGGAAATATTACCCGAATGGTAT  
TTCTTTCCCGTATTTCAAATACTTCGTACAGTGCCCAATAAGTTATTGGGCGTTCTTTTAATGGTTTTCGGTACCTACAGG  
ATTATTAACAGTACCCTTTTTGGAGAATGTTAATAAATTCCAAACCCATTTTCGCCGTCCAGTAGCAACCACCATCTTTT  
TGATTGGTACTGTAGTTGCCCTTTGGTTAGGTATTGGAGCAACATTACCTATTGAGAAATCCCTAACTTTAGGTCTTTTT

-----  
ATGATTGAAGTTTTTCTATTTGGAATCGTGTTAGGTTTAATTCCCATTACTTTGGCTGGATTATTTGTAAGTGCATATTT  
ACAATACCGACGAGGTGATCAGTTGGATCTT-----  
ATGCTCACTATAACT-----  
AGTTATTTTCGGTTTTTTACTAGTGGTTTTAATTATAACCTCATCTCTATTTATTGGTCTGAGTAAAATA-----  
CGACTTATT-----

-----  
ATGGATATAGTAAGTCTTGCTTGGGCTGCTTTAATGGTAGTTTTTTTCATTTTCTCTTTCCCTCGTAGTATGGGGAAGAAG  
TGGACTA---ATGATTATTCGTTCCACCGGAACCA-----GAAGTGAAA-----  
ATTTTGGTAGATAGAGATCCCATAAAAACCTTCTTTTCGAGGAATGGGCAAAACCAGGTCATTTTCTCAAGAACAATAGCTAA  
GGGACCTGATACTACTACTTGGATCTGGAACCTACATGCTGACGCTCATGATTTTGATAGCCATACTAATGATTTAGAGG  
AGATTTCCCGAAAAGTTTTTAGTGCCCATTTTCGGCCAACCTCTCTATCATCTTTCTTTGGCTGAGTGGCATGTATTTTCAT  
GGTGCTCGTTTTTCCAATTATGAGGCATGGTTAAGTGATCCTACTCACATTAGGCCTAGTGCTCAGGTGGTTTTGGCCAAT  
AGTGGGCCAAGAAATATTGAATGGTGATGTAGGGGGAGGGTTCCGAGGAATACAAATAACCTCCGGTTTTTTTTTCAGATTT  
GGAGAGCATCTGGAATAACTAGTGAATTACAACCTCTATTGTACCGCAATTGGTGCATTGGTCTTTGCAGCCTTAATGCTT  
TTTGCTGGTTGGTTTTATTATCACAAGCTGCTCCAAAATTGGCTTGGTTCCAAGATGTAGAATCTATGTTGAATCACCA  
TTTGACAGGGCTCCTGGGGTTGGGATCTCTTTCTTGGGCAGGACATCAAATACATGTATCTTTACCAATTAACCAATTTT  
TAAATGCTGCAGTAGATCCCAAAGAGATTCCACTTCCTCATGAATTTATCTTGAATCGGGATCTTTTGGCTCAACTTTAT  
CCGAGTTTTGCCGAGGGAGCAACTCCCTTTTTACCTTGAATTGGTCAAAATACGCAGAATTTCTTACTTTTCGTGGAGG  
ATTAGATCCAGTAACTGGAGGTCTATGGCTGACCGATATTATACACCATCATTTAGCTATTGCAATTTCTTTCTTGATAG  
CGGGTCACATGTATAGGACTAACTGGGGTATTGGTCACAGTATAAAAGACATTTTAGAGGCACATAAAGGTCCATTTACG  
GGCCAGGGTCATAAAGGTCTATATGAGATCCTAACAACGTCAATGGCATGTCTCAATTATCTATTAACCTAGCTATGTTAGG  
TTCTTTGACCATTGTTGTAGCTCACCATATGTATTCTATGCCCCCTTATCCATAACCTAGCTACTGACTATGGTACACAAC  
TGTCATTGTTTTACACATCATATGTGGATTGGTGGATTTCTCATAGTCGGTGCTGCTGCGCATGCAGCTATTTTTATGGTA  
AGAGATTATGATCCGACTATTCGATACAACGATCTATTAGATCGTGTCTTAGACATCGCGATGCAATCATATCACATCT  
TAACTGGGTATGTATATTTTTAGGCTTTCACAGTTTTGGTTTTGTATATTCATAATGATACCATGAGCGCTTTAGGGCGTC  
CTCAAGATATGTTTTTCAGATACGGCTATAACAATTACAACCG---

GTCTTTGCTCAATGGATACAAAATACCCATGCTTTAGCACAGGCACAACAGCCCCAGGTGCAACAACAAGTACCAGTTT  
GACTTGGGGGGGTGATAATTTAGTAGCAGTGGGCGGTAAAGTTGCTTTGTTACCTATTCCGTTAGGAACTGCGGATTTTT  
TGGTCCATCATATTCATGCATTTACAATTCATGTAACAGTATTGATACTCCTAAAGGGTGTCTATTTGCTCGTAGTTCA  
CGATTAATACCGGATAAAGCAAATCTAGGTTTTCGTTTTCTTGTGATGGACCTGGAAGAGGGGGGACATGCCAAGTATC  
CGCTTGGGATCATGCTTCTTAGGACTATTTGGATGTACAATTCATTTCCGTTAGTAATATTCATTTTCAGTTGGAAAA  
TGCAGTCAGATGTTTGGGGTAGTATAAGTGATCAAGGGATAGTAAATCATATCACAGGAGGAAATTTGCGCAGAGTTCC  
ATTACCATTAATGGGTGGCTCCGTGATTTCTTATGGGCACAGGCATCCCAGGTAATTCAGTCTTATGGTTCTTCATTATC  
TGCATATGGTCTTTTTTTCTTGGGTGCACATTTTGTATGGGCTTTTAGTTTTAATGTTTCTATTCC---

AGCGGGCGTGGTTATTGGCAAGAACTTATTGAATCCATTGTTTGGGCTCATAATAAATTAAGGTTGCTCCTGCTACTCA  
GCCTAGAGCCTTGAGCATTGTACAAGGACGTGCTGTAGGAGTAACACATTACCTTCTAGGTGGAATTGCCACAACATGGG  
CATTCTTCTTAGCAAGAATTATTGCAGTAGGA---

ATGGCATTAAAGATTTCCAAGGTTTAGTCAAGGCTTAGCTCAAGACCCACTACTCGTCGTATTTGGTTTTGGTATTGCTAC  
CGCACATGACTTCGAAAGTCATGATGATATTACTGAGGAACGTCTTTATCAGAATATTTTTGCTTCTCATTTTCGGGCAAT  
TAGCAATAAATTTTTCTGTGGACTTCCGGGAATCTGTTTTCATGTAGCTTGGCAAGGGAATTTTGAAGCATGGGTACAGGAT  
CCTTTACATGTAAGACCTATAGCTCATGCAATTTGGGATCCTCATTTTGGTCAACCGGCTGTAGAAGCTTTTACTCGAGG  
AGGTGCTCTAGGCCAGTTAATATAGCCTATTCTGGTGTATCAGTGGTGGTATAACAATCGGTTTACGTACTAATGGGG  
ATCTTTTACTGGAGCTCTTTTTCTATTATTTCTTTCTACTATATCTTTAATAGCGGGTTGGTTACACTTGCAACCAAAA  
TGGAAACCAAGCGTTTCGTGGTTTTAAAAATGCCGAATCCCGCCTCAATCATCATTTGTCAGGATTATTTCGGAGTCAGTTC  
CTTGGCTTGGACAGGGCATTTAGTCCAT

Gossypium

CAGACCCTGCTAGTAATAAGGATGCTCATTTTCTTAAAATATCCCATATACGTAGGCGGAAACAGGGGAAGGGGCCAGATT  
TATCCCGACGGGAACAAAAGTAACAATACTGTTTATAATGCTACGGCAACAGGTATAGTAAGCAAAATCATACGAAAAGA  
A---

AAAGGGGGGTACGAAATAACCATAACGGATGCCTTGGATGGACATCAAGTGGTTGATATTATCCCCCAGGACCAGAACT

TCTTGTTCAGAGGGTGAATCTATCAAACCTCGATCAACCATTAACAATTAATCCTAATGTGGGTGGATTTGGTCAGGGGG  
ATGCAGAAATAGTACTTCAAGACCCACTACGCGTCCAAGGTCTTTTGTCTTCTTGGCATCTATTGTTTTTGCACAAATC  
TTTTTGGTTCTT---AAAAAGAAACAGTTTGAGAAGGTTCAAGTGTCCGAAATG---AATTC---  
ATGAGTAAAGTCTATGATTGGTTCGAAGAGCGCCTCGAAATTCAGGCGATTGCAGATGATATAACTAGTAAATATGTTCC  
TCCTCATGTTAACATATTTTATTGTCTAGGAGGAATTACGCTTACTTGTTTTTTGGTACAAGTAGCTACAGGATTTGCTA  
TGACTTTTTACTATCGTCCAACCGTTACTGAGGCTTTTGTCTTGTTCATAACATAATGACTGAAGCTAACTTTGGTTGG  
TTAATCCGATCAGTTCATCGATGGTTCGGCAAGTATGATGGTCTTAATGATGATCCTGCACGTATTTTCGTGTCTATCTCAC  
TGGTGGTTTTAAAAACCTCGCGAATTAACCTGGGTTACAGGCGTGGTCTGGGTGTGTTGACCGCATCTTTTGGCGTAA  
CAGGTTATTCTTACCTCGGGACCAAATTTGGTTATTGGGCAGTCAAAATCGTAACAGGCGTTCGGGAAGCTATTCCGGTA  
ATAGGATCGCCTTTGGTAGAGTTATTACGTGGAAGTGTAGTGTGGGACAATCCACTTTGACCCGTTTTTATAGTTTTACA  
CACTTTTGTATTACCCCTTCTTACTGCTGTATTTATGTTAATGCATTTCTAATGATACGTAAGCAAGGCATTTCTGGTC  
CTTTA---  
ATGGGAGTAACAAAAAACCTGACTTGAACGATCCTGTATTAAGAGCTAAATTAGCTAAAGGTATGGGTCATAATTATTA  
TGGGGAACCCGCATGGCCCAATGATCTTTTATATATTTTTCCAGTAGTAATTCTCGGTACTATTGCTTGTAACGTGGGCT  
TAGCGGTTCTAGAACCTTCAATGATTGGTGAACCCGCGGATCCATTTGCAACTCCTTTGGAAATATTACCTGAATGGTAT  
TTCTTCTGTATTTCAAATACTTCGTACAGTACCTAACAAAGTTATTGGGTGTTCTTTAATGGTTTCAGTACCCGCGGG  
ATTATTAACAGTACCGTTTTTGGAAAATGTTAATAAATTCAAAATCCATTTTCGTCTCCAGTAGCGACAACCGTTTTTT  
TGATTGGTACTGCAGTAGCCCTTTGGTTGGGTATTGGAGCAACATTACCGATTGATAAATCCCTAACTTTAGGTCTTTTT  
-----  
ATGATTGAAGTTTTTCTATTTGGAATCGTCTTAGGTCTAATTCCTATTACTTTGGCTGGATTATTCGTAACCGCATATTT  
ACAATACAGACGTGGTGATCAGTTGGACCTT-----  
ATGCCTACTATAACT-----  
AGTTATTTCCGTTTTTTACTAGCGGCTTTAACTATAACCTCAGCTTTATTTATTGGTCTGAGTAAGATA-----  
CGACTTATT-----  
-----  
ATGGATATAGTAAGTCTTGCTTGGGCTGCTTTAATGGTAGTCTTTACATTTTCCCTTTCACTCGTAGTATGGGGAAGAAG  
TGGGCTC---ATGATTATTCGTTTCGCCGGAACCA-----GAAGTAAAA-----  
ATTTTGGTAGATAGGACTCCCGTAAAAACTTCTTTTCGAGGAATGGGCTAGGCCGGGCCATTTCTCAAGAACAATAGCTAA  
GGGACCCGATACCCACTTTGGATCTGGAACCTACATGCCGATGCTCACGATTTTCGATAGCCATAACCAAGTATTTGGAGG  
AGATCTCTCGAAAATATTTAGTGCCATTTTCGGCCAACCTCCTCATCTTTCTTTGGCTGAGCGGCATGTATTTCCAC  
GGTCTCGTTTTTCCAATTATGAAGCATGGCTCAGCGATCCTACTCACATTGGACCTAGCGCCAGGTGGTTTTGGCCAAT  
AGTGGGCCAAGAAATCTTGAATGGCGATGTGGGTGGGGGTTTTCCGAGGAATACAAATAACCTCTGGTTTTTTTTAGATTT  
GGCGAGCATCTGGAATAACTAGTGAATTACAACCTCTATTGTACCGCAATCGGTGCATTGGTCTTTGCGGCCCTTAATGCTT  
TTTGCCGGTTGGTTCCATTATCACAAAGCGGCCCAAAATTTGGCTTGGTTCCAAGATGTAGAATCTATGTTGAATCACCA  
TTTAGCAGGGCTACTGGGACTTGGGTCCCTTTCTTGGGCGGGGCATCAAGTACATGTATCTTTACCGATAAACCAATTTT  
TAAATGCTGGAGTAGACCCTAAAGAGATCCCCTTCCCCATGAATTTATCTTGAATCGTGATCTTTTGGCTCAACTTTAT  
CCCAGTTTTGCCGAGGGAGCAACCCATTTTTTACCTTGAATTTGGTCAAAATATGCGGAATTTCTTACTTTTCGCGGAGG  
ATTAGATCCAGTGACTGGGGTCTATGGTTGACTGATATTGCACACCATCATTTAGCTATTGCAATTTCTTTTCTAATAG  
CGGGTCACATGTATAAGACCAACTGGGGCATTGGGCATAGCCTAAAAGATATTTTAGAGGCTCATAAAGGTCCATTTACA  
GGCCAAGGGCATAAAGGACTATATGAAATCCTAACAAACATCATGGCATGCTCAATTATCTCTTAACTTAGCTATGTTAGG  
CTCTTTAACCATTGTTGTAGCTCACCATATGTATTCATGCCCTTATCCATATCTAGCTACTGACTATGGTACACAAC  
TGTCATTGTTACACATCACATGTGGATTGGTGGATTTCTGATAGTGGGTGCCGCTGCGCATGCAGCCATTTTTATGGTA  
AGAGACTATGATCCAACCTACTCGATAACAACGATCTATTAGATCGTGTCTTAGGCATCGTGATGCAATCATATCACATCT  
CAACTGGGTATGTATATTTCTAGGCTTTACAGTTTTGGTTTTGTATATTCATAATGATACCATGAGCGCTTTAGGGCGTC  
CACAAGATATGTTTTAGATAACCGCTATAACAATTACAACC---  
GTCTTTGCTCAATGGATAACAAACACCCATACTTTAGCACCCGGTGCAACCGCTCCTGGTGCAACAGCGAGCACCAGTTT  
GACCTGGGGAGGCGGTGATTTAGTGGCAGTAGGGGGCAAAGTTGCTTTGTTACCTATTCCATTAGGAACCGCAGATTTTT  
TGGTCCATCACATTCATGCATTTACGATTCATGTGACGGTATTGATACTCCTGAAAGGTGTTCTATTTGCTCGCAGCTCG  
CGTTTTGATACCGGATAAAGCAAATCTCGGTTTTCGTTTTCCCTTGTGACGGGCTGGAAGAGGGGGGACATGTCAAGTATC  
CGCTTGGGATCATGTCTTCTTAGGACTATTCTGGATGTACAATTCATTTTCGGTAGTAATATTCCATTTTCAGTTGGAAAA  
TGCAGTCAGATGTTTGGGGTACTATAAGTATCAAGGGGTGGTAACTCATATCACAGGAGGAAATTTGCGCAGAGTTCT  
ATTACTATTAATGGGTGGCTACGCGATTTCTTATGGGCACAAGCATCCCAGGTAATTCAGTCTTATGGTTCTTCAATTATC  
TGCATATGGCCTTCTTTTCTTAGGTGCTCATTTTGTATGGGCTTTTAGTTTTAATGTTTCTATTC---  
AGCGGACGTGGTTATTGGCAAGAACTTATTGAATCCATCGTTTTGGGCTCATAATAAATAAAAGTTGCTCCTGCTACTCA  
GCCTAGAGCCTTGAGCATTGTACAAGGACGTGCTGTAGGGGTAACCCATTACCTTCTGGGTGGAATTGCCACAACATGGG  
CATTCTTCTTAGCAAGAATTATTGCAGTAGGA---  
ATGGCATTAAAGATTTCCAAGGTTTAGCCAAGGATTAGCTCAGGACCCCACTACTCGTCTGATTTGGTTTTGGTATTGCTAC

CGCGCATGACTTCGAGAGTCATGATGATATTACTGAGGAACGTCTTTATCAGAATATTTTTGCTTCTCACTTCGGGCAAT  
TAGCAATAATTTTTCTGTGGACTTCCGGAAATCTGTTTCATGTAGCTTGGCAGGGAAATTTGAGGCATGGGTACAGGAT  
CCTTTACATGTAAGGCCGATTGCTCATGCAATTTGGGATCCTCATTTTTGGTCAACCGCGGTGGAAGCTTTTACTAGAGG  
GGGCGCTCCTGGTCCAGTGAATATCGCTTACTCTGGTGTATCAGTGGTGGTATAACAATCGGGTTACGTACTAATGAAG  
ATCTTTATACTGGAGCCCTTTTTCTATTATTTCTTTCTGCTCTATCCTTAATAGCGGGTTGGTTACACCTACAACCGAAA  
TGGAAACCGAGCGTTTTCGTGGTTCAAAAACGCCGAATCTCGTCTCAATCATCATTTGTCAGGACTATTCGGAGTAAGTTC  
CTTGGCTTGGACAGGGCACTTAGTCCAT

Helianthus

CGGACCCCGCTACTAAGAAAGACATTCACTTCTTAAAATATCCTATATACGTAGGTGGAAACAGGGGAAGGGGCCAGATT  
TATCCTGACGGGAGCAAAAGTAACAATACAGTTTATAATGCTACAGCATCAGGTATAGTAAGCAAAATCCTACGAAAAGA  
A---

AAGGGGGGATACGAAATAACCATAGCGGATGCGTCCGATGGACGTCAAGTGGTTGATATTATCCCTCCGGGGCCAGA  
ACTTCTTGTTCAGAAAGCGAATCTATCAAATTTGGATCAACCGTTGACAAGTAATCCTAATGTAGGCGGATTTGGTCAGGGAG  
ATGCAGAAATAGTACTTCAAGATCCATTACGTGTACAAGGCCTTTTGTCTTCTTCGCAGCTGTTATTTGGCACAAATA  
TTTTTGGTTCTT---AAAAAGAAACAGTTCGAGAAAGTTCAATTGTCCGAAATG---

AATTTCTAAATGAGTAAAGTATATGATTGGTTTGAAGAGCGTCTTGAGATTCAGGCGATTGCGGATGATATAACTAGTAA  
ATATGTTCCCTCCTCATGTAAACATATTTTTATTGTCTAGGGGGAATTACGCTTACTTGTTTTTTAGTACAAGTGGCTACAG  
GATTTGCTATGACCTTTTACTATCGTCCGACCGTTACTGATGCTTTTTGCTTCTGTTCAATACATAATGACTGAAGCTAAT  
TTTGGTTGGTTAATCCGATCAGTTTCATCGATGGTCCGCAAGTATGATGGTCCATAATGATGATCCTACATGTATTTCTGTGT  
ATATCTCACCGGTGGATTTAAAAAACCGCGCGAATTAACCTGGGTTACAGGTGTGGTTCTGGCTGTATTGACTGCATCAT  
TTGGTGTAACTGGTTATTTTACCCTGGGACCAAATTTGGTTATTGGGCAGTGAATAATTGTAACAGGTGTACCTGACGCT  
ATTCTGTAAATAGGATCACCTTTGGTGAATATTGCGCGGAAGTGTAGTGTGGGACAATCCACTTTGACTCGTTTTTA  
TAGTTTACACACTTTTGTATTGCCGCTTCTTACTGCCGTATTTATGTTAATGCACTTCCCAATGATACGTAAACAAGGGA  
TTTCTGGTCTTTTATAGATGGGAGTAACAAAAAACCTGACTTGAATGATCCTGTATTAAGAGCTAAATTTGGCTAAAGGT  
ATGGGTACATAATTATTACGGGGAGCCCGCATGGCCCAACGATCTTTTATATATTTTTCCGGTAGTAATTCTAGGCACGAT  
TGCATGTAACGTAGGCTTAGCGGTTCTAGAACCATCAATGATTGGTGAACCGGCAGATCCGTTTGCAACTCCTTTGGAAA  
TATTACCCGAATGGTATTTCTTTCCCGTATTTCAAATACTTCGTACAGTACCCAATAAATTTGGGTGTTCTGTTAATG  
GTATCAGTACCCGCGGGATTTAACAAGTACCCTTTTTAGAGAATGTTAATAAATTTCCAAAATCCATTTCTGTCGTCCAGT  
AGCGACAACCGTATTTTTGATTGGTACCAGTGGCCCTTTGGTTGGGTATTGGTGAACATTACCTATTGATAAATCCC  
TAACCTTAGGCTTTTTTTAA-----

ATGATTGAAGTTTTTTCTATTTTGAATCGTGTAGGTCTAATTCCTATTACTTTGGCTGGATTATTTGTAAGTGCATATTT  
ACAATACAGGCGTGGCGATCAGTTGGACCTTTGA-----

ATGCCTATCATAACT-----

AGTTATTTCCGGTTTTCTACTAACGGCTTTAACTATAGCCTCAGCTCTATTTATTGGTCTGAGCAAGATA-----

CGACTTATTTGA-----

ATGGATATAGTAAGTCTCGCTTGGGCTGCTTTAATGGTAGTCTTTACATTTTCCCTTTCACTCGTAGTATGGGGAAGAAG  
TGGACTTTAGATGATTATTCGTTCCGCCGAACCA-----GAAGTAAA-----

ATTTTGGTAGATAGGGATCACATAAAAACCTTCATTCGAGGAATGGGCTAGACCGGGTCATTTCTCAAGAACAATAGCTAA  
AGGCCCTGAAACTACCCTTGGATCTGGAACCTACATGCTGATGCTCACGATTTTCGATAGCCATACCAGTGATTTGGAGG  
AGATCTCTCGAAAAGTATTTAGTGCATTTTCGGTCAACTCTCCATCATCTTCTTTGGCTGAGTGGCATGTATTTCCAC  
GGTGTCTGTTTTTCCAATTATGAAGCATGGCTAAGCGATCCGACTCACATTTGGGCCTAGTGGCCAGGTGGTTTGGCCGAT  
AGTGGGCCAAGAAATATTGAATGGTGTATGTGGGCGGGGCTTCCGAGGAATACAAATAACCTCTGGGTTTTTTCAGCTTT  
GGCGAGCATCTGGAATAACTAGCGAATTACAACCTCTATTGTACCGCAATTTGGTGCATTGATCTTTGCAGCGTTAATGCTT  
TTTGTCTGGTTGGTTTTCATTATCATAAAGCTGCTCCAAAATTTGGCTTGGTTTCAAGATGTAGAATCTATGTTGAATCACCA  
TTTAGCGGGGCTACTAGGACTTTGGTCTCTCTTGGGCGGGGCATCAAGTACATGTATCTTTACCTATTAACCAATTTT  
TAAACGCTGGAGTAGATCCTAAAGAAATACCACTTCCCTCATGAATTTATCTTGAATCGGGATCTTTTGGCTCAACTTTAT  
CCCAGTTTTGCGAGGGAGCAACCCCGTTTTTACCTTGAATTTGGTCAAAAATATGCTGACTTTCTTACTTTTCTGTTGAGG  
ATTAGACCCCGTAACTGGAGGTCTATGGCTAACCAGTACTGCACACCATCATTTAGCTATTGCAATTTCTTTTTCTTATAG  
CGGGTACATGTATAGGACCAACTGGGGCATTGGTCTATGGTCTAAAAGATATTTTAGAAGCTCATAAAGGTCCATTTACG  
GGCCAGGGCCATAAAGGCCTATATGAGATCCTAACAACGTCGTGGCATGCTCAATTATCTCTTAACTAGCTATGTTAGG  
CTCTTTAACCATTGTTGTAGCTCACCATATGTATGCCATGCCTCCTTATCCATATCTAGCTACTGACTATGGTACACAAC  
TATCATTGTTACACATCATATGTGGATTGGTGGATTTCTCATAGTTGGTGTCTGCTGCGCATGCAGCCATTTTTATGGTA  
AGAGACTACGATCCAACCTACTCGATAACAACGATCTATTAGATCGTGTCTTAGGCATCGCGATGCAATCATATCACATCT  
CAACTGGGCATGTATATTTCTAGGCTTTACAGTTTTGGTTTGTATATTCATAATGATACCATGAGCGCTTTAGGGCGTC  
CTCAAGATATGTTTTAGATACCGCTATCCAATTACAACC---

GTCTTTGCTCAATGGATACAAAACACCCACGCTTTAGCACCTGGTGAACGGCTCCTGGTGAACAGCAAGCACCAGTTT

AACTTGGGGGGGCGGTGATTTAGTAGCAGTGGGCGGCAAGGTAGCTTTGTTACCTATTCCATTAGGAACCGCGGATTTTT  
TGGTACATCACATTCATGCATTTACGATTCATGTGACGGTATTGATACTTCTGAAAGGTGTTCTATTTGCTCGTAGCTCC  
CGTTTTGATACCGGATAAAGCAAATCTTGGGTTTTCGTTTTCTTGTGATGGGCTTGAAGGGGGGGACATGTCAAGTATC  
AGCTTGGGACCATGTCTTCTTAGGACTATTCTGGATGTACAATTCATTTTCAGTAGTCATATTTTCATTTTCAGTTGGAAAA  
TGCAGTCAGATGTTTTGGGGCAGTATAAGCGATCAAGGAGTCGTAACCTCATATCACGGGAGGAACTTTGCGCAGAGTTCT  
ATTACTATTAATGGGTGGCTCCGCGATTTCTTATGGGCACAGGCATCCCAGGTAATTCAGTCTTATGGTTCTTCATTATC  
CGCATATGGCCTTTTTTTTCTAGGTGCTCATTTTGTATGGGCTTTTAGTTAATGTTTTTATTC---

AGTGGACGTGGTTATTGGCAAGAACTTATTGAATCCATCGTTTTGGGCTCATAATAAATTTAAAGTTGCTCCTGCTACCCA  
GCCGAGAGCCTTAAGCATTGTACAAGGACGTGCTGTAGGAGTAACCCATTACCTTCTGGGTGGAATTGCCACAACATGGG  
CGTTCTTCTTAGCAAGAATTATTGCAGTAGGATAAATGGCATTAAAGATTTCCAAGGTTTAGCCAAGGCTTAGCTCAGGAC  
CCCCTACTCGTCGTATTTGGTTTTGGTATTGCTACCGCGCATGACTTTGAGAGTCATGATGATATTACTGAGGAACGCTCT  
TTATCAGAATATTTTTGCTTCTACTTCGGGCAATTAGCAATCATTTTTCTGTGGACTTCCGGAATCTCTTTCATGTAG  
CTTGGCAAGGAAATTTTGGATCATGGGTACAGGACCCTTTACATGTAAGACCTATTGCTCATGCAATTTGGGATCCTCAT  
TTTGGTCAACCAGCTGTAGAGGCTTTTACTCGAGGGGGTGTCTCTGGGCCGGTGAATATCGCTTATTCTGGTGTATTATCA  
GTGGTGGTATAACAATCGGTTTACGAACATAATGAAGATCTTTATACTGGAGCTCTTTTTCTATTATTTATTTCTGCCATAT  
CTTTAATAGCGGGTTGGTTACACCTACAACCGAAATGGAAACCGAGCGTTTTCTGGTTCAAAAATGCAGAATCTCGTCTC  
AATCATCATTTATCAGGACTCTTTGGCGTAAGTTTCTTGGCTTGGACAGGGCATTTAGTCCAT

Illicium

CAGACCCTGCTACGAAGAAAGAGGTTCACTTTTTAAAATATCCCATATATGTAGGTGGAAACAGGGGAAGGGGTCAGATT  
TATCCCGATGGGAGCAAGAGTAACAATACAGTATATAATGCTACAGGAGCAGGTCTAGTAAGCAAAAATAGTACGTAAAGA  
A---

AAAGGAGGATATGAAATAACCATAGCGGATGCCTCGGATGGGCACCAAGCGGTTGATATTATACCTCCAGGACCAGA  
TCTTGTTCAGAGGGCGAATACATCAAGCTTGATCAACCATTAACGAGTAATCCCAATGTGGGTGGATTTGGTCAGGGAG  
ATGCAGAAATAGTACTTCAAGATCCATTACGTGTCCAAGGGCTTCTGTTCTTCTTGGCATCTGTTATTCTGGCACAAATC  
TTTTTGGTTCTG---AAAAAGAAACAATTTGAGAAGGTTCAATTGGCCGAAATG---AATTTCT---

ATGAGTAAAGTATATGATTGGTTCGAGGAGCGTCTCGAGATTCAGGCGATTGCAGATGATATAACTAGTAAATATGTTCC  
TCCTCATGTCAACATATTTTCATTGTCTAGGAGGGATCACACTTACTTGTTTTTTAGTACAAGTAGCTACGGGTTTTGCTA  
TGACTTTTTACTATCGTCCGACCCTTACAGAGGCTTTTGCCTCTGTTCAATACATAATGACTGAAGCCAACCTTTGGTTGG  
TTAATCCGATCAGTTTCAATCGATGGTCAGCAAGTATGATGGTCTTAATGATGATCCTGCACGATTTTCGCGTTTTATCTCAC  
AGGTGGATTTAAGAAACCTCGCGAGTTGACTTGGGTTACGGGTGTGGTTCTAGCTGTATTGACTGCATCTTTTGGCGTAA  
CTGGTTATTCTTACCTCGGGACCAAATTGGTTATTGGGCAGTCAAAAATCGTGACCGGCGTACCTGAGGCTATCCCTGTC  
ATAGGATCGCCTTTGGTAGAGTTATTACGCGGAAGTGCTAGTGTGGGTCAATCCACTTTGACCCGTTTTTATAGTTTTACA  
CACTTTTGTATTACCTCTTCTTACTGCCGTATTTATGTCAATGCACCTTTCCAATGATACGTAAACAGGGCATTTCAGGTC  
CTTTA---

ATGGGAGTAACAAAGAAACCTGACTTGAATGATCCTGTATTAAGAGCTAAATCGGCTAAAGGGATGGGGCATAATTATTA  
CGGAGAACCCTGCATGGCCTAATGATCTTTTATATATTTTTCTGTAGTAATTTCTAGGTAATTTGCATGTAACGTGGGTC  
TAGCAGTTCTAGACCCGTCATGATTGGTGAACCAGCAGATCCATTTGCAACTCCTTTGGAAATATTACCCGAATGGTAC  
TTCTTTCCCGTATTTCAAATACTCCGTACAGTACCCAATAAGTTATTGGGTGTTCTTTTAAATGGTTTTCTGTACCAACGGG  
ATTATTGACAGTACCTTTTTTGGAGAATGTTAATAAATTTCCAAAATCCATTTTCGTCGTCCAGTAGCTACAACAGTTTTTT  
TGCTAGGTACCGCAGTAGCTCTTTGGTTAGGTATTGGAGCAACATTACCTATTGATAAATCCCTAACTTTAGGTCTTTTT  
CAAATCGATTCAACTGTGAAATACCAAGGTATTACGTATGTATCTAGGGAAATGATTGAAGTTTTTCTATTTGGAATCGT  
GTTAGGTTTAAATTCCTATTACTTTGGCCGGATTATTTGTAACCTGCATATTTACAATACAGGCGCGGTGATCAGTTGGACC  
TT-----ATGCCTACTATAACT-----

AGTTATTTTCGGTTTTCTACTGGCTGCTTCAACTATAACCCAGCTCTATTGATTGGTCTGAGCAAGATA-----  
CGACTTATT-----

ATGATTCACATGGATATAGTAAGTCTTGCTTGGGCGGCTTTAATGGTAGTCTTTACATTTTTCCCTTTCACTCGTAGTATG  
GGGAAGAAGTGGACTC---ATGATTATTCGTTTCGCCGGAACCA-----GAAGTGAAG-----  
-----

ATTGTGGTGGATAGGGATCCCGTAAAACTTCTTTTCGAGGAATGGGCCAGACCCGGCCATTTCTCAAGAACAATAGCTAA  
GGGCCCTGATACTACCACTTGGATCTGGAACCTACATGCTGATGCTCACGATTTTCGATAGCCATACCAATGATTTGGAGG  
AGATCTCTCGAAAAGTATTTAGTGCTCATTTCGGTCAACTATCCATCATCTTTCTTTGGCTGAGTGGCATGTACTTCCAT  
GGCGCCCGTTTTTCCAATTATGAAGCATGGCTGAGCGATCCTACTCACATTGGACCCAGTGCCAGGTGGTTTTGGCCAAT  
AGTGGGTCAAGAAATACTGAATGGCGATGTAGGCGGAGGTTCCGAGGAATACAAATAACCTCTGGGTTTTTTTCAGATTT  
GGCGAGCGTCTGGAATAACTAGTGAATTACAACCTCTATTGTACCGCAATTGGTGCATTGGTCTTTGCAGCGTTAATGCTT  
TTTGGCCGGCTGGTTCCATTATCACAAGCTGCTCCAAAATGGCTTGGTTCCAAGATGTAGAATCCATGTTGAACCACCA  
CTTAGCGGGTTACTAGGGCTTGGGTCTCTTTCTTGGGCGGGACACCAAGTACATGTATCTTTACCGATTAACCAATTTCT



TAGATGCTGGAGTGGATCCTAAAGAAATACCGCTTCCTCATGAATTCATCTTGAATCGGGATCTTTTGGCTCAACTTTAT  
CCCAGTTTTGCGGAGGGATCAACCCCATTTTTACCTTGAATTGGTCAAATACGCGGAATTTCTTAGTTTTCTGGGAGG  
ATTAGATCCAGTAACAGGGGTCTATGGCTGACCGATATTGCTCATCATCATTTGGCTATTGCAATTTCTTTTCTGATAG  
CAGGTCACATGTATAGGACCAACTGGGGCATTGGTCATGGCCTGAAAGATATTTTAGAGGCTCATAAAGGTCCATTTACA  
GGCAAGGGTCATAAAGGTCTTTATGAGATCCTAACAACGTCATGGCATGCTCAATTAGCTCTTAACCTAGCTATGTTAGG  
CTCTTCAACCATTGTTGTAGCTCACCATATGTATTCTATGCCCCCTATCCATACCTAGCTATTGACTATGGTACACAAC  
TTTCGTTGTTTACACATCACATGTGGATCGGTGGATTTCTCATAGTTGGCGCTGCTGCACATGCAGCCATTTTTATGGTA  
AGAGACTATGATCCAACCTACTCGATAACAACGATCTATTAGATCGTGTCTTAGGCATCGCGATGCAATCATATCACATCT  
CAACTGGGCCTGTATATTTTTAGGCTTTACAGTTTTGGCTTATATATTCATAATGATACCATGAGCGCTTTAGGGCGTC  
CTCAAGATATGTTTTAGATAACCGCTATAACAATTACAACCC---

ATCTTTGCTCAATGGGTACAAAACACTCATGCTTTAGCACCTGTTGCAACAGCTCCTGGTGCAACAACAAGCACCAGCTT  
GACTTGGGGTGGTGGTGGTTTTAGTAGCAGTAGGTGGCAAAGTCGCTTTGTTACCTATTCCATTAGGAACCGCAGATTTTT  
TGGTACATCACATTCATGCATTTACGATCCATGTGACTGTATTGATACTACTGAAAGGTGTTCTATTTGCTCGCAGCTCC  
CGTTTTGATACCCGATAAGGCAAATCTTGGTTTTCGTTTTCCCTTGTGACGGACCTGGAAGAGGGGGAACATGTCAAGTATC  
CGCCTGGGATCATGTCTTCTTGGGTCTATTTGGATGTACAATGCGATTTCCGGTAGTAATATTCCATTTTCAGTTGGAAAA  
TGCAGTCGGATGTTTGGGGTAGTATAAGTGATCAAGGGGTGGTAACTCATATCACGGGAGGAAACTTTGCACAGAGTTCT  
ATTACTATTAATGGGTGGCTCCGGGATTTTTTATGGGCACAGGCCTCTCAGGTAATTCAGTCTTATGGTTTCTCATTATC  
CGCATATGGCCTTTTTTCTAGGTGCTCATTTTTGTCTGGGCCTTCAGTTTTAATGTTTCTATTCT---

AGCGGCCGTGGTTATTGGCAAGAACTCATTGAATCCATCGTTTTGGGCTCATAACAAATTAAGGTTGCTCCTGCTACTCA  
GCCTAGAGCCTTGAGCATTGTACAAGGACGTGCTGTAGGAGTAACCCATTACCTTCTGGGTGGAATTGCCACAACATGGG  
CATTCTTCTTAGCAAGAATTATTGCAGTAGGA---

ATGGCATTAAAGATTTCCAAGGTTTAGCCAAGGCTTAGCTCAGGACCCACTACTCGTTCGATTTGGTTTTGGTATTGCTAC  
CGCACATGACTTCGAAAGTCATGATGATATCACTGAAGAACGCTTTTATCAGAACATTTTTGCTTCTCACTTCGGGCAGT  
TAGCAATAATCTTCTGTGGACTTCCGGGAATCTGTTTTCATGTGGCTTGGCAAGGAAATTTGAATCATGGGTACAGGAC  
CCCTTACATGTAAGACCTATTGCTCATGCAATTTGGGATCCTCATTTTTGGTCAACCAGCCGTAGAAGCCTTTACTCGAGG  
AGGTGCTCTCGGTCCAGTGAATATCGCTTATTTCCGGTGTATTATCAGTGGTGGTATAACAATCGGCTTACGCACAAATGAAG  
ATCTTTATACTGGAGCTCTTTTTCTATTATTTCTTTCTGCCATATCCTTAATAGCGGGTTGGTTACACCTACAACCCAAA  
TGGAAACCAAGCGTTTTCTGTGGTTCAAGAATGCCGAATCTCGTCTCAATCACCATTTGTCAGGACTTTTTCGGAGTAAGTTC  
CTTGGCTTGGACAGGGCATTTAGTTTCAT

Jasminum

CCGACCCTGCTACTAACAAGATGTTCACTTCTTAAAATATCCTATATACGTAGGCGGGAACAGGGGAAGGGGTGAGATT  
TATCCCGACGGAAGCAAGAGTAACAATACGGTTTTATAATGCTACAGCAGCGGGTATAGTAAGCAAAATAATACGAAAAGA  
A---

AGGGGGGGATATGAAATATCCATAACAGATCCATCGGATGGACGTCAAGTAGTTGATATTATCCCTCCAGGGCCAGA  
TCTTGTTCAGAGGGTGAATCCATCCAATTTGATCAACCATTAACGAGTAATCCTAATGTGGGCGGATTTGGTTCAGGGAG  
ATGCAGAAATAGTACTTCAAGATCCATTACGTGTTCAAGGCCTTTTGTCTTCTTGGCATCTGTTATTTTGGCACA  
TTTTTGGTTCTT---AAAAAGAAACAGTTTGAAGAAGTTCAATTGGCCGAAATG---

AATTTCTAGATGAGTAAAGTCTATGATTGGTTTCAAGAACGCTCTCGAGATTCAGGCGATTGCGGATGATATAACTAGTAA  
ATACGTTCCCTCCCATGTGAATATATTTTATTGTTTGGGGGAATTACGCTTACTTGTTTTTTAGTACAAGTTGCTACTG  
GGTTTGTATGACTTTTTACTACCGTCCGACCGTTACTGAGGCTTTTGCCTCTGTTCAATATATAATGACGGAAGCTAAC  
TTTGGTTGGTTAATCCGATCAGTTTCATCGATGGTCCGCAAGTATGATGGTTCTAATGATGATCCTGCATGTTTTCTGT  
CTATCTCACCGGTGGATTTAAAAACCCCGCAATTGACTTGGGTTACAGGTGTGGTTCTGGGGGTATTGACCGCATCTT  
TTGGCGTAACTGGTTATTCCTTACCTCGGGACCAAATTGGCTATTGGGCAGTGAATAATTGTAACAGGTGTACCTGAAGCT  
ATTCCTGTAATAGGAGCGCCTTTGGTAGAATTATTGCGCGGAAGTGTAGTGTGGGACAATCCACTTTGACTCGTTTTTA  
TAGTTTACACACTTTTGTATTGCCACTTCTTACTGCTGTATTTATGTTAATGCACTTTCCAATGATACGTAAACAAGGTA  
TTTCTGGTCTTTATAGATGGGAGTAACAAAAAACCTGATTTGAATGATCCTGTATTAAGAGCAAAATTTGGCTAAAGGT  
ATGGGTCATAAATTTACGGAGAACCCGCATGGCCCAATGATCTTTTATATATTTTTCCAGTAGTAATTTCTAGGTACTAT  
TGCATGTAACGTAGGCTTAGCGGTTCTAGAACCATCAATGATTGGTGAACCGGCCGATCCGTTTGAACCCCTTTGGAAA  
TATTACCGGAATGGTATTTCTTTCCCGTATTTCAAATACTTCGTACAGTGCCCAATAAATTTGGGTGTTCTTTTAAATG  
GTTTACGTACCTGCGGGATTATTAACAGTACCCTTTTTAGAAAATGTTAATAAATTTCCAAAATCCATTTCTGTCGTCCAGT  
AGCGACAACCGTCTTTTTGATTGGTACCAGTCCGCTCTTTGGTTGGGTATTGGTGCAACATTACCTATTGATAAATCCC  
TAACCTTAGGTCTTTTTTAA-----

ATGATTGAAGTTTTTCTATTTGGAATCGTGTAGGTCTAATTCCTATTACTTTGGCTGGATTATTTCGTAACCTGCATATTT  
ACAATACAGGCGGGGTGATCAGTTAGATCTTTGA-----

ATGCTTACTATAACC-----

AGTTATTTTCGGTTTTTTTACTAGTGGTTTTAACTATAACTTCAGCTCTATTTATTGGTCTGAGCAAGATA-----

CGACTTATTTGA-----

-----  
ATGGATATAGTAAGTCTCGCTTGGGCTGCTTTAATGGTAGTCTTTACATTTTCTCTTTCACTCGTAGTGTGGGGAAGAAG  
TGGACTCTAAATGATTATTCGTTTCGCCGGAACCA-----GAAGTCAA-----  
ATTTTGGTAGATAGGGATCACATAAAAACCTCTTTTCGAGGAATGGGCCAGACCGGGCCATTTCTCAAGAACAATAGCTAA  
AGGACCTGATACTACCACCTGGATCTGGAACCTACATGCTGATGCTCACGATTTTCGATAGCCATACCAGTGATTTGGAGG  
AGATCTCTCGAAAAGTATTTAGTGCCCATTTTCGGTCAACTTTCCATCATCTTTCTTTGGCTGAGCGGTATGATTTCCAC  
GGTGCTCGTTTTTCCAATTATGAAGCGTGGCTAAGTGATCCAACCTCACATTGGGCCTAGTGCCAGGTGGTTTTGGCCAAT  
AGTGGGCCAAGAGATATTGAACGGTGTATGTGGGCGGGGTTCCGAGGCATACAAATAACCTCTGGTTTTTTTCAGATTT  
GGCGAGCATCTGGAATAACTAGTGAATTACAACCTCTATTGTACCGCAATCGGTGCATTGGTCTTTGCAGCGTAAATGCTT  
TTTGCTGGTTGGTTTTCAATTATCATAAAGCGGCCCAAAATTTGGCTTGGTTTTCAAGATGTGGAATCTATGTTGAATCACCA  
TTTAGCGGGGCTACTAGGACTTTGGGTCTCTCTTTGGGCGGGGCATCAAGTACATGTATCTTTACCAGTTAACCAATTTT  
TAAACGCTGGAGTAGATCCTAAAGAGATACCACCTTCTCATGAATTTATCTTGAATCGAGAACCTTTGGCTCAACTTTAT  
CCAAGTTTTGCGGAGGGAGCAACTCCATTTTTACCTTGAATTGGTCAAAATATGCGGAATTTCTTAGTTTTTCATGGAGG  
ATTAGATCCAGTAACTGGGGTCTATGGCTGACCGATATTGCACACCATCATTAGCTATTGCAATTCTGTTCCCTGATAG  
CGGGTCACATGTATAGGACTAACTGGGGTATTGGCCATGGCCTAAAAGATATTTTAGAAGCTCATAAAGGTCCATTTACA  
GGTCAGGGCCATAAAGGCCTATATGAGATCCTAACACGTCATGGCATGCTCAGTTATCTCTTAACCTAGCTATGTTAGG  
CTCTTTAACCATTTGTTGTAGCTCACCATATGTATTCCATGCCTCCTTATCCATATCTAGCTACTGACTATGGTACACAAC  
TGTCATTGTTTTACACATCACATGTGGATTGGTGGATTTCTCATAGTTGGTGCTGCTGCGCATGCAGCCATTTTTATGGTA  
AGAGACTATGATCCAACCTACTCGATAACAACGATCTATTAGATCGTGTCTTAGACATCGTGATGCAATCATATCACATCT  
CAACTGGGCATGTATCTTTCTAGGCTTTACAGTTTTGGTTTTATATATTATAATGATACCATGAGCGCTTTAGGGCGTC  
CTCAAGATATGTTTTCAGATACCGCTATACAATTACAACC---

Lactuca

CGGACCCCGCTACTAAGAAAGACATTTCACTTCTTAAAATATCCTATATACGTAGGCGGAAACAGGGGAAGGGGCCAGATT  
TATCCTGACGGGAGCAAGAGTAACAATACAGTTTATAATGCTACAGCATCCGGTATAGTAAGCAAAATCCTACGAAAAGA  
A---  
AAGGGGGGATACGAAATAACCATAGCGGATGCATCGGATGGACGTCAAGTGGTTGATATTATCCCGCCGGGGCCAGA  
TCTTGTTCAGAAAGCGAATCTATCAAATTTGAGCAACCGTTGACAAGTAATCCTAATGTGGGCGGATTTGGTCAGGGAG  
ATGCAGAAATAGTACTTCAAGATCCATTACGTGTACAAGGCCCTTTGTTCTTCTTAGCATCTGTTATTTGGCACAATA  
TTTTTGGTTCTT---AAAAAGAAACAGTTCGAGAAGGTTCAATTTGCCGAAATG---  
AATTTCTAGATGAGTAAAGTCTATGATTGGTTTTGAAGAACGTCCTGAGATTGAGCGGATTGCAGATGATATAACTAGTAA  
ATATGTTCTCCTCATGTAAACATATTTTTATTGTCTAGGGGGAATTACGCTTACTTGTTTTTTAGTCCAAGTGGCTACAG  
GATTTGCTATGACCTTTTACTATCGTCCGACCGTTACTGATGCTTTTGTCTGTTCAATACATAATGACTGAAGCTAAT  
TTTGGTTGGTTAATCCGATCAGTTTCATCGATGGTCGGCAAGTATGATGGTCCTAATGATGATCCTACATGTATTTCTGTG  
ATATCTCACCAGGTGGATTTAAAAAACCTCGCGAATTAACCTTGGGTTACAGGTGTGGTTCTGGGTGATTGACTGCATCTT  
TTGGTGTAACTGGTTATTTCTTACCTCGGGACCAAATTTGGTTATTGGGCAGTGAAAATTGTAACAGGTGTACCTGAAGCT  
ATTCTGTAAATAGGATCACCTTTGGTAGAATTATTGCGCGGAAGTGTAGTGTGGGACAATCCACTTTGACTCGTTTTTA  
TAGTTTACACACTTTTGTATTGCCGCTTCTTACTGCCGATTTTATGTTAATGCACTTCCAATGATACGTAAACAAGGTA  
TTTCTGGTCTTTTATAG-----  
AACAAAAAACCTGACTTGAATGATCCTGTATTAAGAGCGAAATTTGGCTAAAGGTATGGGTCAATAATTATTACGGGGAGC

CCGCATGGCCCAATGATCTTTTATATATTTTTCCGGTAGTAATTCTAGGTACTATTGCATGTAACGTAGGGTTAGCGGTT  
CTAGAACCATCAATGATTGGTGAACCGGCAGATCCATTTGCAACTCCTTTGGAAATATTACCCGAATGGTATTTCTTTCC  
CGTATTTCAAATACTTCGTACAGTACCCAATAAATTATTGGGTGTTCTTTTAAATGGTTTTAGTACCTGCGGGATTATTAA  
CAGTACCTTTTTTAGAGAATGTTAATAAATCCAAAATCCATTTTCGTTCGTCCAGTAGCGACAACCGTATTTTTGATTGGT  
ACCGCAGTGGCCCTTTGGTTGGGTATTGGTGCAACATTACCTATTGATAAATCCCTAACTTTAGGTCTTTTTTAA-----

ATGATTGAAGTTTTCTATTTGGAATCGTGTTAGGTCTAATTCCTATTACTTTGGCTGGATTATTTGTAACCTGCATATTT  
ACAATACAGGCGTGGCGATCAGTTGGATCTTTGA-----  
ATGCTTACCATAACT-----  
AGTTATTTCCGTTTTCTACTGACGGCTTTAACTATAACCTCAGCTCTATTTATTGGTCTGAGCAAGATA-----  
CGACTGATTTGA-----

ATGGATATAGTAAGTCTCGCTTGGGCTGCTTTAATGGTAGTCTTTACATTTTCCCTTTCACTCGTAGTATGGGGAAGAAG  
TGGACTTTAGATGATTATTCGTTTCGCCGGAACCA-----GAAGTAAAA-----

ATTTTGGTAGATAGGGATCACATAAAAACTTCATTCGAGGAATGGGCTAGACCGGGTCATTTCTCAAGAACAATAGCTAA  
AGGCCCTGAAACTACCCTTGGATCTGGAACCTACATGCTGATGCTCACGATTTTCGATAGCCATACCAGTGATTTGGAGG  
AGATCTCTCGAAAAGTATTTAGTGCGCATTTTCGGTCAACTCTCCATCATCTTCTTTGGCTGAGTGGCATGTATTTCCAC  
GGTGCTCGTTTTTCCAATTATGAAGCATGGCTAAGCGATCCGACTCACATTAGGCCTAGTGCCCAAGTGGTTTTGGCCGAT  
AGTGGGCCAAGAAATATTGAATGGTGTATGTTGGGCGGGGCTTCCGAGGAATACAAATAACCTCTGGTTTTTTTCAGATTT  
GGCGAGCATCTGGAATAACTAGCGAATTACAACCTACTGTACCGCAATTGGTGGATTGGTCTTTGCGGCGTTAATGCTT  
TTTGCTGGTTGGTTTTATTATCATAAAGCTGCTCCAAAATGGCTTGGTTTTCAAGATGTAGAATCTATGTTGAATCACCA  
TTTAGCGGGGCTACTAGGACTTGGGTCTCTCTTTGGGCGGGACATCAAGTACATGTATCTTTACCGATTAACCAATTTT  
TAAACGCTGGAGTAGATCCGAAAGAAATACCACTTCCCTCATGAATTTATCTTGAATCGGGATCTTTTGGCTCAACTTTAT  
CCCAGTTTTGCGGAGGGAGCAACCCCATTTTTACCTTGAATTGGTCAAAATATGCGGACTTTCTTACTTTTTCGTGGAGG  
ATTAGACCCAGTAACTGGAGGTCTATGGCTAACTGATACGGCACACCATCATTTAGCTATTGCAATTTCTTTTTCTGATAG  
CGGGTCACATGTATAGGACCAACTGGGGCATTGGTCATGGTCTAAAAGATATTTTAGAAGCTCATAAAGGTCCATTTACG  
GGCCAGGGCCATAAAGGCCTATATGAGATCCTAACACCGTCAATGGCATGCTCAATTATCTCTTAACTAGCTATGTTAGG  
CTCTTTAACCATTGTTGTAGCTCACCATATGTATGCCATGCCCTTATCCATATCTAGCTACTGACTATGGTACACAAC  
TGTCTATTGTTTACACATCATATGTGGATTGGTGGATTTCTCATAGTTGGTCTGCTGCGCATGCAGCCATTTTTTATGGTA  
AGAGACTATGATCCAACCTACTCGATAACAACGATCTATTAGATCGTGTCTTAGGCATCGCGATGCAATCATATCACATCT  
CAACTGGGCATGTATATTTCTAGGCTTTTACAGTTTTGGTTTTGTATATTCATAATGATACCATGAGCGCTTTAGGGCGTC  
CTCAAGATATGTTTTTTCAGATACCGCTATCCAATTACAACCC---

GTCTTTGCTCAATGGATACAAAACACCCACGCTTTAGCACCTGGTGCAACGGCTCCTGGTGCAACAGCAAGTACCAGTTT  
AACTTGGGGGGGCGGTGATTTAGTAGCAGTGGGCGGCAAGGTAGCTTTGTTACCTATTCCATTAGGAACGGCGGATTTTT  
TGGTACATCACATTCATGCATTTACGATTCATGTGACGGTATTGATACTTCTGAAAGGTGTTCTATTTGCTCGTAGCTCC  
CGTTTTGATACCGGATAAAGCAAATCTTGGTTTTCGTTTTCTTGTGATGGGCTTGAAGGGGGGGGACATGTCAAGTATC  
AGCTTGGGACCATGTTTTCTTAGGACTATTCTGGATGTACAATTCATTTTCAGTAGTCATATTTTATTTCAGTTGGAAAA  
TGCAGTCAGATGTTTTGGGGCAGTATAAGCGATCAAGGAGTAGTAACCTCATATCACGGGAGGAACTTTGCGCAGAGTTCT  
ATTACTATTAATGGGTGGCTCCGCGATTTCTTATGGGCACAGGCATCCCAGGTAATTCAGTCTTATGGTTCTTCATTATC  
CGCATATGGCCTTTTTTCTAGGTGCTCATTTTGTATGGGCTTTTAGTTTTAATGTTTTTATTCT---

AGTGGACGTGGTTATTGGCAAGAACTTATTGAATCCATCGTTTTGGGCTCATAATAAATTTAAAGTTGCTCCTGCTACCCA  
GCCGAGAGCCTTAAGCATTGTACAAGGACGTGCTGTAGGAGTAACCCATTACCTTCTGGGTGGAATTGCCACAACATGGG  
CGTTCTTCTTAGCAAGAATTATTGCAGTAGGATAAATGGCATTAAAGATTTCCAAGGTTTAGCCAAGGCTTAGCTCAGGAC  
CCCCTACTCGTCGTATTTGGTTTGGTATTGCTACCGCGCATGACTTCGAGAGTCATGATGATATTACTGAGGAACGTCT  
TTATCAGAATATTTTTGCTTCTCACTTCGGTCAATTAGCAATAATTTTTCTGTGGACTTCCGGAAATCTCTTTCATGTAG  
CTTGGCAAGGAAATTTTGTAGTCATGGGTACAGGACCTTTACATGTAAGACCTATTGCTCATGCAATTTGGGATCCTCAT  
TTTGGTCAACCGGCTGTAGAAGCTTTTACTCGAGGGGTGCTCTTGGCCAGTGAATATCGCCTATTCTGGTGTTTTACCA  
GTGGTGGTATAAATCGTTTTACGAACCTAATGAAGATCTTTATACTGGAGCTCTTTTTCTATTATTAATTTCTGCCATAT  
CTTTAATAGCGGGTTGGTTACACCTACAACCGAAATGGAAACCGAGTGTTCGTGGTTCAAAAATGCAGAATCTCGTCTC  
AATCATCATTTATCAGGACTCTTCGGCGTAAGTTTCTTGGCTTGGACAGGGCATTTAGTCCAT

Liriodendron  
CGGACCCTGCTACTAAGAAAGACGTTCACTTCTTAAAATATCCCATATATGTAGGTGGGAACAGGGGAAGAGGTGAGATT  
TATCCCGATGGGAACAAGAGTAACAATACAGTCTATAATGCTACAGCAGCAGGTATAGTAAACAGAATAGTACGTAAAGA  
A---

AAAGGGGGCTATGAAATAACCATAGCTGATGCATCGGATGGACACCAAGTGGTTGATATTATACCTCCAGGACCAGA  
ACTTCTTGTTCAGAGGGTGAATCTATCAAGCTTGTATCAACCATTAACGAGTAATCCCAATGTGGGTGGATTTGGT  
CAGGGAGATGCAGAAATAGTACTTCAAGATCCATTACGTGTCCAAGTTTTGTTGTTCTTCTTGGCATCTGTTATTCT  
GGCACAAATC

TTTTTGGTTCTA---AAAAAGAAACAGTTTGAGAAGGTTCAATTGTCCGAAATG---AATTTCT-----  
AAAGTATATGATTGGTTTCGAGGAGCGTCTCGAGATTTCAGGCGATTGCAGATGATATACTAGTAAATATGTTCCCTCTCA  
TGTCAACATATTTTTATTGTCTAGGAGGGATCACACTTACTTGTTTTTTAGTACAAGTAGCTACCGTTTTGCTATGACTT  
TTTACTATCGTCCGACCCTTACAGAGGCTTTTGCCTCTGTTCAATACATAATGACTGAAGCCAACCTTTGGTTGGTTAATC  
CGATCAGTTTCATCGATGGTCAGCAAGTATGATGGTGCTAATGATGATCCTACACGTATTTTCGTGTGTATCTCACAGGTGG  
ATTTAAAAAACCTCGCGAATTGACTTGGGTTACGGGTGTGATTTTTGGCTGTATTGACTGCATCTTTTTGGTGTAACTGGTT  
ATTCCTTACCTCGGGACCAATTGGTTATTGGGCAGTAAAAATCGTGACAGGTGTACCTGAAGCTATTCCTGTAATAGGA  
TCGCCTTTGGTAGAGTTATTACGTGGAAGTGCTAGTGTGGTCAATCCACTTTGACTCGTTTTTATAGTTTACACACTTT  
TGTATTACCTCTTCTTACTGCCGTATTTATGTTAATGCACCTTTCCAATGATACGTAAGCAAGGTATTTTCAGGTCCTTTA-  
-----  
AACAAAGAAACCTGACTTGAATGATCCTGTATTAAGAGCTAAATTGGCTAAAGGGATGGGGCATAATTATTACGGAGAAC  
CCGCGTGGCCCAATGATCTTTTATATATTTCTCCAGTAGTCATTCTAGGTAATTTGCATGTAACGTAGGCCTAGCGGTT  
CTAGAACCGTCAATGATTGGTGAACCAGCGGATCCATTTGCAACTCCTTTGGAAATATTACCCGAATGGTACTTCTTTCC  
CGTATTTCAAATTCTCCGTACAGTACCCAATAAGTTATTGGGTGTTCTTTTAAATGGTTTTAGTACCAACGGGATTATTAA  
CAGTACCCTTTTTGGAGAACGTTAATAAATTCAAAATCCATTTTCGTGTCAGTAGCTACAACAGTCTTTTTGATCGGT  
ACTGTTATAGCTCTTTGGTTAGGTATTGGAGCAACATTACCTATTGATAAATCTCTAACTTTAGGTCTTTTT-----  
-----  
ATGATTGAAGTTTTTCTATTTGGAATCGTCTTAGGTCTAATTCCTATTACTTTGGCTGGATTATTCGTAACCTGCATATTT  
ACAATACAGACGCGGTGATCAGTTGGACCTT-----  
ATGTCTACTATAACT-----  
AGTTATTTTCGGTTTTTCTACTGGCTGCTTCAACTATAACCCAGCTCTATTGATTGGTCTGAGCAAGATA-----  
CGACTTATT-----  
-----  
ATGGATATAGTAAGTCTCGCTTGGGCTGCTTTAATGGTAGTCTTTACATTTTCCCTTTCACTCGTAGTATGGGGAAGAAG  
TGGACTC---ATGATTATTCGTTTCGCCGGAACCA-----GAAGTAAAG-----  
ATTGTGGTGGATAGGGATCCATAAAAACTTCTTTTCGAGGAATGGGCCAGACCCGGCCATTTCTCAAGAACAATAGCTAA  
GGGCCCTGATACTACCCTTGGATCTGGAACCTACATGCTGATGCTCAGGATTTTCGATAGCCATACCAGTGAATTTGGAGG  
AGATCTCTCGAAAAGATTTTAGTGTCTATTTTCGGTCAACTCTCCATCATCTTTCTTTGGTTGAGTGGCATTGTACTTCCAT  
GGCCTCCGTTTTTCCAATTATGAAGCATGGCTAAGCGATCCTACTCACATTTGGACCCAGCGCCAGGTGGTTGGCCAAAT  
AGTGGGTCAAGAAATATTGAATGGTGTATGTGGGCGGGGTTTCCGAGGAATACAATAACCTCTGGTTTTTTTTCAGATTT  
GGCGAGCATCCGGAATAACTAGTGAATTACAACCTCTATTGTACCGCAATTGGTGCATTGGTTTTTGCAGCGTTAATGCTT  
TTTGCTGGTTGGTTCCATTATCACAAAGCTGCTCCAAAATTTGGCTTGGTTCCAAGATGTAGAATCTATGTTGAATCACCA  
CTTAGCGGGTTACTAGGACTTGGGTCTCTTTCTTGGGCGGGACACCAAGTACATGTATCTTTACCGATTAACCAATTTT  
TAGACGCTGGAGTGGATCCTAAAGAGATACCCTTCTCATGAATTTATCTTGAATCGGGATCTTTTGGCCCAACTTTAT  
CCCAGTTTTGCGGAGGGAGCAACTCCATTTTTTACCTTGAATTGGTCAAAAATACGCGGAATTTCTTAGTTTTCGTGGAGG  
GTTAAATCCAGTAACAGGGGTCTATGGCTGACCGATATTGCACACCATCATTAGCTATCGCAATTTCTTTTCTGATAG  
CTGGTCACATGTATAGGACCAACTGGGGCATTGGTCACGGTCTGAAAGATATTTTAGAGGCCATAAGGGTCCATTTACA  
GGCCAGGGTCATAAAGGCCTCTATGAGATCCTAACAACGTCATGGCACGCTCAATTATCTCTTAACTAGCTATGTTAGG  
CTCTTCAACCATTGTTGTAGCTCACCATATGTATTCCATGCCCCCTATCCATACCTAGCTATTGACTATGGTACACAAC  
TTTTCGTTGTTACACATCACATGTGGATTGGTGGATTTCTCATAGTTGGTGTGCTGCACATGCAGCCATTTTTATGGTA  
AGAGACTATGATCCAACCTACTCGATACAACGATCTATTAGATCGTGTCTTAGGCACCGGGATGCAATCATATCACATCT  
CAACTGGGCATGTATATTTCTAGGCTTTTACAGTTTTGGCTTGATATTCATAATGATACCATGAGCGCTTTAGGGCGTC  
CCCAAGATATGTTTTTCAGATACCGCTATACAATTACAACC---  
ATCTTTGCTCAATGGGTACAAAACACCCATGCTTTAGCACCTGGTGAACAGCTCCTGGTGCAACAACAAGCACCAGCTT  
GACTTGGGGGGTAGTGAATTTAGTAGCAGTAGGCGGCAAAGTCGCTTTGTTACCTATTCCATTAGGAACCGCAGATTTTT  
TGGTACATCACATTCATGCATTTACGATCCATGTGACCGTATTGATACTACTTAAAGGTGTTCTATTTGCTCGTAGCTCA  
CGCTTGATACTGATAAAGCAAATCTTGGTTTTTCCCTTTGTGACGGACCTGGAAGAGGGAGGACATGTCAAGTATC  
TGCCTGGGATCATGTCTTCTTAGGTCTATTCTGGATGTACAATGCAATTTTCGGTAGTAATATTCCATTTTCAGTTGGAAAA  
TGCAGTCAGATGTTTTGGGGTAGTATAAGTGATCAAGGGGTGGTAACTCATATCACGGGAGGAACTTTGCACAGAGTTCC  
ATTACTATTAATGGGTGGCTCCGGGATTTTTTATGGGCACAGGCATCTCAGGTAATTCAGTCTTATGGTTCTTTCATTATC  
TGCATATGGCCTTTTTTCTGGGTGCTCATTTTGTCTGGGCTTTTCAGTTTAAATGTTTCTATTCT---  
AGCGGCCGTGGTTATTGGCAAGAACTCATTGAATCCATCGTTTTGGGCTCATAACAAATTTAAAGTTGCTCCTGCTACTCA  
GCCAAGAGCCTTGAGCATTGTACAAGGACGTGCTGTAGGAGTAACCCATTACCTTCTGGGTGGAATTGCCACAACATGGG  
CATTCTTCTTAGCAAGAATTATTGCAGTAGGA---  
ATGGCATTAAAGATTTCCAAGGTTTAGCCAAGGCTTAGCTCAGGACCCACTACTCGTCTGATTTGGTTTTGGTATTGCTAC  
CGCACATGATTTTCGAGAGTCATGATGATATTACTGAGGAACGCTTTTATCAGAACATTTTTGCTTCTCACTTCGGGCAGT  
TAGCAATAATCTTTCTGTGGACTTCCGGAATCTGTTTCATGTAGCTTGGCAAGGAAATTTTGGTTCATGGGTACAGGAC

CCTTTACATGTAAGACCTATTGCTCATGCAATTTGGGATCCTCATTTTGGTCAACCAGCTGTAGAAGCCTTTACTCGAGG  
AGGTGCTCTCGGCCAGTGAATATCGCTTATTCCGGTGTATATCAGTGGTGGTATAACAATCGGCTTACGCACTAATGAAG  
ATCTTTATACTGGAGCTCTTTTTCTATTATTTCTTTCTGCCATATCCTTAATTGCGGGTTGGTTACACCTACAACCCAAA  
TGGAAACCAAGCGTTTCGTGGTTCAAAAATGCCGAATCTCGTCTCAATCATCATTTGTCAGGACTCTTTGGAGTAAGTTC  
GTTGGCTTGGACAGGACATTTAGTTCAT

Lotus

CGGATCCCGCTACTAATAGAGATGTTAATTTCTTAAAATATCCTATATACGTAGGCGGCAACAGGGGAAGGGGTGAGATT  
TATCCCGACGGGAGTAAGAGTAATAATAATGTTTATAATGCTACAACGAGCGGTATAATAAACAAAATTATACGAAAAGA  
T---

AAGGGGGGGTACGAAATAACGATAGTGGATGCATCGGATGGACGTGAAGTAATTGATATTATACCTCCAGGACCAGA  
ACTTCTTGTTCAGAGGGTGAATCCATCAAACCTTATCAACCTTTAACAAGTAATCCAAATGTGGGTGGATTGGTCAGGGAG  
ATGCAGAAATAGTTCTTCAAGATCCGTTACGTGTCCAAGGTCTCTTGTCTTCTTGGCATCTATTATTTTCGCACAAATC  
TTTTTGGTTCTT---AAAAAGAAACAATTTGAGAAGGTTCAATTGTCGAAATG---AATTTT---

ATGAGTAAAGTCTATGATTGGTTCGAAGAACGTCTTGAGATTGAGGCGATTGCCGATGATATAACTAGTAAGTATGTTCC  
TCCTCATGTCAACATATTTTATTGTTTAGGGGAATTACACTTACTTGTTTTTTAGTCCAAGTAGCCACGGGGTTTGCTA  
TGACTTTTTATTATCGTCTACAGTCACTGAAGCTTTTGCTTCTGTTCAATATATAATGACTGAGGCGAATTTTGGTTGG  
TTAATCCGATCGGTTTCATCGATGGTTCGGCGAGTATGATGGTCTTAATGATGATCCTGCACGTATTTTCGCGTCTATCTTAC  
TGGTGGTTTTTAAAAACCTCGCGAATTGACTTGGGTTACTGGTGTGGTTTTGGGTGTATTGACCGCATCTTTTGGTGTAA  
CTGGTTATTACCTTGGGACCAAATTGGTTATTGGGCAGTCAAATTTGTAACAGGCGTACCTGAAGCTATTCTGTGA  
ATAGGATCGTCCGTGGTAGAGTTATTGCGTGAAGTGTAGTGTGGGACAATCTACCCTGACTCGTTTTTATAGTTTACA  
TACTTTTGTATTACCTCTCCTTACTGCCGATTTTATGTTAATGCATTTTCAATGATACGTAAGCAAGGCATTTCTGGCC  
CTTTA---

ATGGGAGTAACAAAAAACCTGACTTGAATGATCCTGTATTAAGAGCTAAATTTGGCTAAAGGAATGGGTGATAATTATTA  
TGGAGAACCCGCATGGCCCAACGATCTTTTATATATTTTCCAGTAGTGATTCTGGGTACTATTGCATGTAACGTAGGCT  
TAGCAGTTCTAGAACCATCAATGATTGGGGAACCCGCGGATCCATTTGCAACCCCTTTGGAAATATTGCCCGAATGGTAT  
TTCTTTCTGTATTTCAAATACTTCGTACAGTGCCAAATAAGTTATTGGGTGTTCTTTTAAATGGTTTCAGTACCCGCAGG  
ATTAGTAACAGTACCCTTTTGGAAAATGTTAATAAATTTCCAAAATCCATTTGCGCGTCCAGTAGCAACAACCGTTTTTT  
TAATTGGTACCGCAGTGTCTCTTTGGTTGGGTATTGGAGCAACATTACCCATTGAGAAATCCCTTACTTTAGGTCTTTTT

ATGATTGAAGTTTTTTCTATTTGGAATCGTGTTAGGTCTAATTCCTATTACTTTGGCTGGATTATTTGTAAGTGCATATTT  
ACAATACCGACGTGGTGATCAGTTGGACCTT-----

ATGCCCACTATAACT-----

AGTTATTTTGGTTTTCTACTAGCGGTTTTAACTATAACCTCTGGTCTATTTATCAGTCTGAGGAAGCTA-----  
CGACTTATT-----

ATGGATATAGTAAGTCTTGCCTGGGCTGCTTTAATGGTAGTTTTTACATTTTCCCTTTCCCTCGTAGTATGGGGAAGAAG  
TGGACTT---ATGATTATTCGTTTCGCCGGAACCA-----GAAGTCAA-----

ATTTTGGTGGATAGGGATCCATAAAAACCTTCTTTTCGAGGAATGGGCAAAACCCGGCCATTTCTCAAGAACAATAGCTAA  
GGGACCTGATACTACTACTTGGATCTGGAACCTACATGCTGATGCTCATGATTTTCGATAGCCATACTAGTGATTTGGAGG  
ATATTTCCCGAAAAATATTTAGTGCCCATTTTCGGGCAACTCTCCATCATCTTTCTTTGGCTGAGTGGCATGTATTTCCAC  
GGTGTCTGTTTTTCCAATTATGAAGCATGGCTAAGCGATCCTACTCACATTAGACCCAGTGCTCAGGTGGTTTTGGCCAAT  
AGTGGGCCAAGAAATATTGAATGGTGTATGTGGGCGGGGTTCCGAGGAATACAAATAACCTCGGGTTTTTTTCAGATTT  
GGCGCGCCTCTGGAATAACTAGTGAATTACAACCTCTATTGTACCGCAATTGGTGGGTTGGTCTTTGCAGCCTTAATGCTT  
TTTGTCTGGGTGGTTTTATTATCACAAGCTGCTCCAAAATTTGGCTTGGTTTTCAAGATGTGGAATCCATGTTGAATCACC  
TTTGGCAGGTCTACTAGGACTGGGTCTCTTTCTTGGGCGGGGCATCAAGTACATGTATCTTTACCGATTAACCAATTT  
TAAATGCTGGAGTAGATCCCAAAGAGATTCACCTTCTCATGAATTTATCTTAAACCGGGATCTTTTGGCTCAACTTTAT  
CCAAGTTTTTCCGAGGGAGCAACCCATTTTCACTTTGAATTTGGGCAAAAGTACGCGGATTTTCTTACTTTTTCGCGGAGG  
ATTGGATCCAGTAACTGGTGGTCTGTGGCTGACCGATATTGCACATCATCATTTAGCTATTGCCATTTCTTTCTTGTATAG  
CGGGTCACATGTATAGGACCAACTGGGGTATCGGTCATGGTATAAAAGATATTTTAGAGGCTCATAAAGGTCCATTTACA  
GGACAGGGGCATAAAGGTCTATATGAGATTCTAACAACCTTCATGGCATGCTCAATTATCTATTAACCTAGCTATGTTAGG  
CTCTTTGACCATTATTGTAGCTCACCATATGTATTCTATGCCCCCTTATCCATACCTAGCGACTGACTATGGTACACAAT  
TGTCATTGTTACGCATCACATGTGGATTGGTGGATTTCTCATAGTTGGTGTCTGCTGCACATGCAGCCATTTTTATGGTA  
AGAGACTATGATCCAACGACTCGATAACAACGATCTATTAGATCGTGTCTTAGGCATCGCGATGCAATCATATCACATCT  
AAACTGGGTGTGTATATTTTAGGCTTTTCATAGTTTTGGTTTTGTATATTCATAATGATACCATGAGTGCCTTAGGGCGTC  
CCCAAGATATGTTTTAGATAACAGCTATAACAATTGCAACCC---

ATTTTTGCTCAATGGATACAAAATACCCACGCTTTAGCACCGGGCATAACGGCCCCTGGTGAACAACAGGTACCAGTTT  
GACTTGGGGGGTGGTGAATTTAGTGGCAGTAGGCAACAAGTGCCTTTATTACCTATTCCTTTAGGAACTGCGGATTTTT

TGGTCCATCATATTCATGCATTTACAATTCATGTGACGGTATTGATACTCCTAAAAGGTGTTCTATTTGCTCGTAGCTCA  
AGATTGATACCAGATAAAGCAAATCTTGGTTTTTCGTTTTCCCTTGTGATGGACCAGGAAGAGGGGGAACATGCCAAGTATC  
CGCTTGGGATCATGTCTTCTTAGGACTATTTTGGATGTACAATGCAATTTTCAGTAGTAATATTTCCATTTTCAGTTGGAAAA  
TGCAGTCAGATGTTTTGGGGGAGTATAAGCGATCAAGGGGTAGTAACCTCATATCACAGGAGGAAACTTTGCGCAAAGTTCC  
ATTACTATTAATGGGTGGCTCCGCGATTTCTTATGGGCACAGGCATCTCAGGTAATTCAGTCTTATGGTTTCGTCATTATC  
TGCATATGGTCTTTTTTTCTTGGGTGCCACTTTGTATGGGCTTTTAGTTTTAATGTTTTCTATTC---  
AGCGGGCGTGGTTATTGGCAAGAACTTATTGAATCCATCGTTTTGGGCTCATAATAAATTTAAAGTTGCTCCTGCTACTCA  
GCCGAGAGCCTTGAGCATTGTACAGGGCCGGGCTGTAGGAGTAACACATTACCTTCTGGGTGGAATTGCCACAACGTGGG  
CATTCTTCTTAGCAAGAATTATTGCAGTAGGA---  
ATGGCATTAAAGATTTCCAAGGTTTAGCCAAGGTTTAGCTCAGGACCCCACTACTCGTCGATTTGGTTTTGGTATTGCTAC  
CGCACATGACTTTGAGAGTCATGATATTAATCTAGGAAACGTCTTTATCAGAATATTTTTGCTTCTCATTTTCGGACAAT  
TAGCAATAAATTTTTCTGTGGACTTCCGGGAATCTGTTTCATGTAGCTTGGCAAGGAAATTTTGGGCATGGGTACAGGAT  
CCTTTACATGTAAGACCTATTGCTCATGCAATTTGGGATCCTCATTTTTGGTCAACCGGCTGTAGAAGCTTTTACTCGAGG  
GGGTGCTCTTGGTCCAGTGAATATAGCCTATTCTGGTGTATTATCAGTGGTGGTATACTATTGGTTTTACGTAATAAGGAG  
ATCTTTATAGTGGAGCTCTTTTTCTATTATTTCTTTCTGCCATATCTTTACTAGCGGGCTGGTTACACCTACAACCGAAA  
TGGAAACCTAGCGTTTCATGGTTTTAAAATGCCGAATCCCGCCTCAATCATCTTTGTCAGGACTCTTTGGAGTTAGTTC  
CTTGGCTTGGACAGGACATTTAGTCCAT

Morus

CGGACCCCGCTACTAAGAAAGACGTTCACTTCTTAAAATATCCCATATACGTAGGCGGGAACAGGGGAAGGGGTGAGATT  
TATCCCGACGGGAGCAAGAGTAACAATAATGTTTATAATGCTACATCGGCGGGTATAGTAAGCAAAATCATAACGAAAAGA  
A---

AAAGGGGGATACGAAATAACCATAGTGGATGCATCGGATGGACGTCAAGTGGTTGATATTATCCCTCCAGGACCAGAACT  
TCTTGTTCAGAGGGCGAATCCATCAAACCTGGATCAACCATTAACGAGTAATCCGAATGTGGGTGGATTTGGTCAGGGGG  
ATGCGGAAATAGTACTTCAAGATCCATTACGTGTACAAGGCCTTTTGGCTCTTCTTGGCATCTATTATTTTGGCACAAATC  
TTTTTGGTTCTT---AAAAAGAAACAGTTTGGAGAAGGTTCAATTGTCCGAAATG---

AATTTCTAGATGAGTAAAATCTATGATTGGTTTCAAGAACGTCTTGGATTCAGGCAATTGCGGATGATATAACTAGTAA  
ATATGTTCCCTCATGTCAACATATTTTATTGTCTAGGAGGAATTACGCTTACTTGTTTTTTAGTACAAGTAGCTACAG  
GGTTTGTATGACTTTTTTATTATCGTCCGACCGTTACGGAGGCTTTTGTCTTGTTCATATATAATGACTGAAACTAAC  
TTTTGGTTGGTTAATCCGATCAGTTTTCATCGATGGTCCGGCAAGTATGATGGTACTAATGATGATTTTTCACGTATTTCTGTG  
GTATCTCACTGGTGGCTTTAAAAAACCTCGCGAATTGACTTGGGTTACTGGTGTGGTTTTGGCTGTATTGACCGCATCTT  
TTGGTGTAACTGGTTATTCCTTACCTTGGGACCAAATTGGTTATTGGGCAGTAAAAATTGTAACAGGTGTACCGGAAGCG  
ATTCTGTAAATAGGATCACCTTGGTAGAGTTATTACGCGGAAGTGTAGTGTGGGACAATCCACTTTGACTCGTTTTTTA  
TAGTTTACACACTTTTGTATTACCTCTTCTTACTGCCGATTTTATGTTAATGCACTTCTTAATGATACGTAAGCAAGGTA  
TTTCTGGCCCTTTATAAATGGGAGTGACAAAAAACCCGACTTGAACGATCCTGTATTAAGAGCTAAATTAGCTAAAGGG  
ATGGGTGATAAATTATTACGGAGAGCCCGCATGGCCCAATGATCTTTTATATATTTTTCCAGTAGTAATTTTAGGTACTAT  
TGCATGTAACGTAGGTTTAGCAGTTCTAGAACCATCAATGATTGGTGAACCTGCGGATCCATTTGCAACTCCCTTGGAGA  
TATTGCCTGAATGGTATTTTTTCCCGTATTTCAAATACTTCGTACAGTGCCCAATAAATTATTGGGTGTTCTTTTAAATG  
GTTTCAGTACCTGCGGATTATTAACAGTACCTTTTTTGGAGAATGTTAATAAATTTCCAAAACCCATTTTCGTGCTCCAGT  
AGCGACAACCGTCTTTTTGATTGGTACCGCGGTAGCCCTTTGGTTGGGTATTGGTGCAACATTACCTATTGATAAATCC  
TAACCTTAGGTCTTTTTTAA-----

ATGATTGAAGTTTTTCTATTTGGAATCGTCTTAGGTCTAATTCCTATTACTTTGGCTGGATTATTCGTAACCTGCATATTT  
ACAATATAGACGTGGTGATCAATTGGACCTTTGA-----

ATGTCTACTATAACT-----  
AGTTATTTCCGTTTTTCTACTAGCAGCTTTGACTATAACCTCAGCTATATTTATCGGTCTGAACAAGATA-----  
CGACTTATTTGA-----

ATGGATATAGTAAGTCTCGCTTGGGCTGCTTTAATGGTAGTCTTTACATTTTCCCTTTCACTCGTAGTATGGGGAAGAAG  
TGGACTCTAGATGATTATTCGTTTCGCCGGAACCA-----GACGTTAAA-----

ATTTTGGTAGATAGGGATCCATAAAGACTTCTTTTCGAGGAATGGGCCAGACCGGGTCATTTCTCAAGAACAATAGCTAA  
GGGGCCTGATACTACCACTTGGATCTGGAACCTACATGCTGATGCTCACGATTTTCGATAGCCAAACCAGTGATTTAGAAG  
AGATCTCTCGAAAAGTATTTAGTGCCCATTTTCGGTCAACTCTCCATCATCTTTCTTTGGCTGAGTGGTATGATTTCCAC  
GGTGTCTGTTTTTCCAATTATGAAGCATGGCTAAGCGATCCTACTCACATTGGACCTAGTGCCAGGTGGTTTTGGCCAAT  
AGTGGGTCAAGAAATATTGAATGGTGTAGTGGCGGGGTTCCGAGGAATACAAATAACCTCTGGTTTTTTTTTCAGATTT  
GGCGAGCATCTGGAATAACTAATGAATTACAACCTCTATTGTACTGCAATTGGTGCATTGGTTTTTGCAGCCTTAATGCTT  
TTTTGCTGGTTGGTTCCATTATCACAAGCTGCTCCAAAATTGGCTTGGTTCCAAGATGTAGAATCTATGTTGAATCACCA  
TTTAGCAGGGCTACTAGGACTTGGGTCTCTTTCTTGGGCGGGGCATCAAGTACATGTATCTTTACCGATTAATCAATTT  
TAAATGCTGGAGTAGATCCTAAAGAGATTCCACTTCTCATGAATTTATCTTGAATCGGGATCTTTTGGCTCAACTTTAT

CCCAGTTTTGCTGAGGGAGCAACCCCATTTTTACCTTGAATTGGTCAAAATATGCAGAATTTCTTACTTTTTCGTGGAGG  
ATTAGATCCAGTAAGTGGGGTCTCTGGCTGACCGATATTGCACACCATCATTTAGCTATTGCAATTTCTTTTCTGGTGTAG  
CGGGTCACATGTATAGGACCAACTGGGGCATTGGTCATGGCATAAAAGATATTTTAGAGGCTCATAAAGGCCCATTTACC  
GGCCAGGGCCATAAAGGCCTATACGAGATCCTAACACCGTCATGGCATGCTCAATTATCTCTTAACCTAGCTATGTTGGG  
CTCTTTAACCATTGTTGTAGCTCATCATATGTATTCCATGCCCCCTTATCCATATCTAGCTACTGACTATGGTACACAAC  
TTTTATTGTTACACATCACATGTGGATTGGTGGATTTCTCATAGTTGGTGTCTGCTGCGCATGCAGCCATTTTTATGGTA  
AGAGACTATGATCCAACCACTCGATAACAACGATCTATTAGATCGTGTCTTAGGCATCGCGATGCAATCATATCACATCT  
CAATTGGGTATGTATATTTTTAGGCTTTACAGTTTTGGTTTTGTATATTCATAATGATACTATGAGCGCTTTAGGGCGTC  
CCCAAGATATGTTTTAGATAACCGCTATAACAATTACAACCC---

GTATTTGCTCAATGGATAACAAACACCCATGCTTTAGCACCTGGTGCAACAGCCCCTGGTGCAACAACAAGCACCAGTTT  
GACTTTGGGGAGGTGGTGTATTTAGTAGCAGTGGGCGGCAAAGTTGCTTTGTTACCTATTCCATTAGGAACCGCAGATTTTT  
TGGTCCATCACATTCATGCATTTACGATTCATGTGACGGTATTGATACTTCTGAAAGGTGTTCTATTTGCTCGTAGCTCG  
CGTTTTGATACCAGATAAAGCAAATCTAGGTTTTCGTTTTCCCTTGTGATGGACCTGGAAGAGGGGGGACATGTCAAGTATC  
TGCCTGGGATCATGTCTTCTTAGGGCTATTCTGGATGTATAATTCAATTTAGTTCGTAATATTCCATTTAGTTGGAAAA  
TGCAGTCAGACGTTTTGGGGTAGTATAAGTGATCAAGGAGTGGTAACTCATATCACGGGAGGAAACTTTGCGCAGAGTTCC  
ACTACTATTAATGGGTGGCTCCGCGATTTCTTATGGGCACAGGCATCCCAGGTAATTCAGTCCATGTTTCTTATTATC  
TGCATATGGCCTTTTTTTTCTAGGTGCTCACTTTGTATGGGCTTTTAGTCTAATGTTTCTATTCC---

AGCGGGCGTGGTTATTGGCAAGAAGTTATTGAATCCATCGTTTTGGGCTCATAATAAATAAAGGTTGCTCCTGCTACTCA  
GCCTAGAGCCTTGAGCATTGTCCAAGGACGTGCTGTAGGAGTAACCCATTACCTTCTGGGTGGAATTGCCACAACATGGG  
CATTCTTCTTAGCAAGAATTATTGCAGTAGGATAAATGGCATTAAAGATTTCCAAGGTTTAGCCAAGGCTTAGCTCAGGAC  
CCCCTACTCGTGTATTTGGTTTTGGTATTGCTACCGCACATGACTTCGAGAGTCATGATGATATTACTGAAGAACGTCT  
TTATCAGAATATTTTTGCCTCGCATTTCGGGCAATTAGCAATAATTTTTTTGTGGACTTCCGGAAATTTGTTTCATGTAG  
CTTGGCAAGGAACTTTGAGGCATGGGTACAGGACCCCTTACATGTAAGACCTATTGCTCATGCAATTTGGGATCCTCAT  
TTTGGCCAACCGGCTGTGGAAGCTTTTACTCGAGGGGGTGTCTTTGGCCCAGTGAATATCGCTTATTCTGGTGTATTATCA  
GTGGTGGTATAACAATCGGTTTACGTACTAATGGAGATCTTTATAATGGAGCTCTTTTTCTATTATTTATTTTCGGCCATAT  
CTTTAATAGCGGGTTGGTTACACCTACAACCGAAATGGAAACCGAGCGTTTTCGTGGTTTTAAAAATGCCGAATCTCGTCTC  
AATCATCATTTGTGAGGGCTATTTCGGAGTAAGCTCCTTGGCTTGGACAGGACATTTAGTTTAT

Nandina

CGGATCCTGCTACTAAGAAAGATGTTTACTTCTTAAAATATCCTATATACGTCGGTGGGAACAGGGGAAGGGGTGAGATT  
TATCCCAGTGGGAGTAAGAGTAACAATACAGTCTATAATGCTACAGCGGCAGGTATAGTAAGCAAATAGTACGTAAAGA  
A---

AAGGGAGGGTATGAACATAACCATAGCAGACGCATCGGAAGGACGCCAAGTCTGTTGATATTATACCTCCAGGACCAGA  
TCTTGTTCAGAAAGGTGAATCCATCAAGCTTGTATCAACCATTAACGAGTAATCCCAACGTGGGAGGATTTGGTCAGGGAG  
ATGCAGAAATAGTACTTCAAGATCCATCACGTGTCCAAGGTCTTTTTTTCTTCTTTCATCCGTTATTCTGGCACA  
TTTTTGGTTCTT---AAAAAGAAACAGTTTGAAGAAGTTCAATTGTCCGAAATG---AATTTCT---

ATGAGTAAAGTATATGATTGGTTTCGAAGAGCGTCTCGAAATTCAGGCGATTGCAGATGATATAACTAGTAAATATGTTCC  
CCCTCATGTCAACATATTTTATTGTCTGGGAGGGATTACGCTTACTTGTCTTCTTAGTACAAGTAGCTACGGGGTTGCCA  
TGACTTTTTACTACCGTCCAACCGTTACCGAGGCTTTTACCTCGGTTCAATACATAATGACTGAAGCTAACTTTGGTTGG  
TTAATCCGATCAGTTTCATCGATGGTTCGGCGAGTATGATGGTCTAATGATGATCCTCCACGATTTTCGTGTGTATCTCAC  
TGGCGGATTTAAAAAACCTCGCGAATTGACTTGGGTTACGGGCGTGGTTCTGGGTGATTGACCGCATCTTTTGGTGTAA  
CAGGTTATTCTTACCTCGGGACCAAATTTGGCTATTGGGCCGTCAAAATCGTGACAGGCGTACCTGACGCGATTCTGTGA  
ATAGGATCACCTTGGTTCGAGTTATTGCGCGGAAGTGCTAGTGTGGGTCAATCCACTTTGACTCGTTTTTATAGTTTACA  
CACTTTTGTATTACCTCTTCTTACTGCCGTATTTATGTTAATGCACCTTCTAATGATACGTAAGCAAGGTATTTCTGGTC  
CTTTA---

ATGGGAGTAACAAAGAAACCTGATTTGAATGATCCTGTATTAAGAGCTAAGTTGGCGAAAGGGATGGGTGATAATTATTA  
TGGTGAACCCGCATGGCCTAATGATCTTTTATATATTTTTCCGGTAGTAATTTGGGTACTATTGCATGTAGCGTAGGGT  
TAGCGGTTCTAGAACCATCAATGATTGGTGAACCAGCAGATCCATTTGCAACCCCTTTGGAAATATTACCCGAATGGTAC  
TTCTTTCCCGTATTTCAAATACTCCGTACAGTACCAATAAGTTATTGGGAGTTCTTTTAAATGGTTTTAGTACCGGCCGG  
ATTATTAACAGTACCTTTTTTGGAGAATGTTAATAAATTCAAAACCCGTTTTCGTGTCCAGTAGCTACAACCGTCTTTT  
TGATTGGTACCGCGGTAGCCCTTTGGTTGGGTATTGGAGCAACATTGCCTATTGATAAATCTCTAACTTTAGGTCTTTTT  
CAAATTGATTCCACCGTGAATAA-----

ATGATTGAAGTTTTACTATTTGGAATCGTGTTAGGTTAATTCCTATTACTTTGGCTGGATTATTCGTAACCTGCATATTT  
ACAATACAGACGCGGGGATCAGTTGGATCTT-----

ATGCTTACTATAACT-----

AGTTATTTTCGGTTTTCTACTGGCGGCTTTAACTATAACCTCAGTTCTATTTATTGGTCTGAACAAGATA-----

CGACTTATTTGA-----

-----

ATGGATATAGTAAGTCTTGCTTGGGCTGCTTTAATGGTAGTCTTTACATTTTCCCTTTCACTCGTAGTATGGGGAAGAAG  
TGGACTC---ATGATTATTCGTTTCGCCGGAACCA-----GAAGTTAAA-----  
ATTTTGGTGGATAGGGATCCCCTTAAAACCTCTTTTCGAGGAATGGGCTAGACCGGGTCATTTCTCAAGAACACTAGCTAA  
GGGCCCCGAGACTACCACCTGGATCTGGAACCTACATGCTGATGCTCACGATTTTCGATAGCCATACGAGTGATTTGGAGG  
AGATCTCTCGAAAAATATTTAGTGCCCATTTTGGTCAACTCTCCATCATATTTCTTTGGCTGAGTGGCATGTATTTCCAT  
GGTGCCCCGTTTTTCCAATTATGAAGCATGGCTAAGCGATCCTACTCACATTCGACCCAGCGCCAGGTGGTTTTGGCCAAT  
AGTGGGCCAAGAAATATTGAATGGTGTATGTGGGTGGGGGTTTTCCGAGGAATACAAATAACCTCTGGTTTTTTTCAGATTT  
GGCGAGCGTCTGGAATAACTAGTGAATTACAACCTCTATTGTACTGCAATTGGTGCATTGGTTTTTGGCGGCTTAATGCTT  
TTTGCCGGTTGGTTCCATTATCACAAAGGCTGCTCCAAAATTGGCTTGGTTCCAAGATGTAGAATCTATGTTGAATCACCA  
CTTAGCGGGTTACTAGGACTTGGGTCTCTTTCTTGGGCAGGGCACCAAGTACATGTATCTTTACCGATTAACCAATTTCT  
TAGACGCTGGAGTAGATCTTAAAGAGATCCCACCTCTCATGAATTCATCTTGAATCGGGATCTTTTGGCTCAACTTTAT  
CCCAGTTTTGGCCGAGGGGAGCAACTCCTTTTTTACCTTGAATTGGTCAAATAACGCAGAATTTCTTACTTTTCGTGGAGG  
ATTAGATCCAGTAACGGGGGCTCTATGGCTGACCGATATTGCACACCATCATTTAGCTATTGCAATTTCTTTCTGATAG  
CTGGTTCACATGTATAGGACCAACTGGGGCATTGGTCTGTTGCTGAAAGATATTTTAGAGGCTCATAAGGGTCCATTTACT  
GGCCAGGGTCATAAAGGCCTCTATGAGATCCTAACAACGTCATGGCATGCTCAATTAGCTCTTAACCTAGCTATGTTAGG  
CTCTTTAACGATTGTTGTAGCTCACCATATGTATTCCATGCCCCCTTATCCATATCTAGCTACTGACTATGGTACACAAC  
TTTTCGTTGTTTACACACCACATGTGGATCGGGGGATTTCTCATAGTTGGTGTCTGCTGCACATGCAGCCATTTTTATGGTA  
AGAGACTATGATCCAACACTACTCGATAACAATGATCTATTAGATCGTGTCTTAGGCACCGCGATGCAATCATATCACATCT  
CAACTGGGCTTGTATATTTCTAGGGTTTACAGTTTTGGTTTTGTATATTCATAATGATACCATGAGCGCTTTAGGGCGTC  
CCCAAGATATGTTTTAGATACCGCTATACAATTACAACCT---  
GTCTTTGCTCAATGGATACAAAACACCCATGCTTTAGCACCTAGTGCAACAGCCCCTGGTGAACAACAAGTACCAGCTT  
GACTTGGGGGGTGGTGGTTTTAGTAGCAGTAGGCGGCAAAGTAGCTTTGTTACCTATTCCATTAGGAACCGCAGATTTTT  
TGGTACATCACATTCATGCATTTACAATCCATGTGACAGTATTGATACTATTGAAGGGGGTTCTATTTGCTCGTAGTTCC  
CGTTTTGATACCAGATAAAGCAAATCTTGGTTTTCGTTTTCCCTTGTGACGGACCTGGAAGAGGGGGGACATGTCAAGTATC  
CGCCTGGGATCATGTCTTCTTAGGTCTATTCTGGATGTACAATGCTATTTCCGGTAGTAATATTCATTTTCAGTTGGAAAA  
TGCAGTCCGATGTTTTGGGGTAGTATAAATGATCAAGGGGTGGTAACTCATATCACGGGAGGAAACTTTGCGCAGAGTTCC  
ATTACTATTAATGGATGGCTCCGTGATTTTTTATGGGCACAGGCATCCCAGGTAATTCAGTCTTATGGTTTATCATTATC  
TGCATATGGCCTTTTTTCTTAGGTGCTCATTTTGTGTGGGCTTTCAGTTAATGTTTTCTATTCC---  
AGCGCCGCTGGTTTTGGCAAGAACTTATTGGAATCTATCGTTTTGGGCTCATAACAAATTTAAAGTTGCTCCTGCTACTCA  
GCCTAGAGCCTTGAGCATTTGTACAAGGACGTGCTGTAGGAGTAACCCATTACCTTCTGGGTGGAATTGCCACAACATGGG  
CGTTCTTCTTAGCAAGAATTATTGCAGTAGGA---  
ATGGCATTAAAGATTTCCAAGGTTTAGCCAAGGCTTAGCTCAGGACCCCACTACTCGTCTGATTTGGTTTTGGTATTGCTAC  
CGCACATGACTTCGAGAGTCATGATGATATTACTGAGGAACGTCTTTATCAGAATATTTTTGCTTCTCACTTTGGGCAAT  
TAGCAATAATTTTTCTGTGGACTTCCGGGAATCTGTTTTCATGTAGCTTGGCAAGGAAATTTTGGATCATGGGTACAGGAC  
CCCTTACATGTAAGACCTATTGCTCATGCAATTTGGGATCCTCATTTTGGTCAACCGGCTGTGGAAGCCTTTACTCGAGG  
GGGTGCTCTCGGCCAGTGAATATCGCTTATTCTGGTGTATTATCAGTGGTGGTATACAATCGGCTTACGCATAATGAAG  
ATCTTTTACTGGAGCTCTTTTTCTATTATTTCTTTCTGCCATATCCTTAATAGCGGGTTGGTTACATCTACAACCGAAA  
TGGAACCAAGTGTTCGTGGTTCAAAAATGCTGAATCTCGCTGAATCATCATTTGTCGGGACTCTTCGGAGTAAGCTC  
CTTGGCTTGGACGGGGCATTAGTTTCAT

Nicotiana

CGGACCCTGCTACTAAGAAGGATGTTCACTTCTTAAAATATCCTATATACGTAGGCGGGAACAGGGGAAGGGGTGAGATT  
TATCCCGACGGCAGCAAGAGTAACAATACTGTTTATAATGCTACAGCAGCAGGTATAGTAAGCAAAATCATACGAAAAGA  
A---  
AAGGGTGGGTATGAGATAACCATAACGGATGCGTCCGATGGACGTCAAGTGGTTGATATTATCCCTCCCGGACCAGAACT  
TCTTGTTCGAGGGCGAATCTATCAAATTTGATCAACCATTAACGAGTAATCCTAATGTAGGCGGATTTGGTCAGGGAG  
ATGCAGAAATAGTACTTCAAGATCCATTACGTGTCCAAGGACTTTTGTCTTCTTGGCATCTGTTATTTTGGCACAATC  
TTTTTGGTTCTT---AAAAAGAAACAGTTTCGAGAAGGTTCAATTTGGCCGAAATG---AATTTCT---  
ATGAGTAAAGTATATGATTGGTTTCAAGAACGTCTCGAGATTCAAGCAATTGCGGATGATATAACTAGTAAATACGTTCC  
TCCCCACGTCAATATATTTTTATTGTTTAGGGGAATTACGCTTACTTGTTTTTTAGTACAAGTAGCTACTGGGTTTGCTA  
TGACTTTTTACTATCGTCCGACCGTTACTGAGGCTTTTGGTCTGTTCAATACATAATGACTGAAGCCAACCTTTGGTTGG  
TTAATCCGATCAGTTCATCGATGGTCCGCAAGTATGATGGTCTAATGATGATCCTGCATGTATTTTCGTGTGTATCTCAC  
CGGCGGATTTAAAAAACCTCGCGAATTGACTTGGGTTACAGGTGTGGTTCTGGCTGTATTAACCGCATCTTTTGGCGTAA  
CTGGTTATTCTTACCTTGGGACCAAGTCCGTTATTGGGCAGTGAATAAGTAAACAGGTGTCCCTGACGCTATTCTGTGA  
ATAGGATCACCTTGGTTCGAATTTATGCGCGGAAGCGCTAGTGTGGGACAATCTACTTTGACCCGTTTTTATAGTTTTACA  
CACTTTTGTATTGCCGCTTCTTACTGCCGATTTTATGTTAATGCATTTCCAATGATACGTAACAAGGTATTTCTGGGC  
CTTTA---  
ATGGGAGTAACAAAAAACCTGACTTGAATGATCCTGTATTAAGAGCTAAATTGGCTAAAGGTATGGGTCAATAATTATTA



TGGAGAGCCCGCATGGCCCAATGATCTTTTATATATTTTTCCAGTAGTAATTCTAGGTACTATTGCATGTAATGTAGGCT  
TAGCCGTTTTAGAACCATCAATGATTGGTGAACCGGCAGATCCATTTGCAACCCCTTTGGAAATATTACCTGAATGGTAT  
TTCTTTCTGTATTTCAAATACTTCGTACAGTGCCCAATAAATTATTGGGGTTCTTTTAATGGTTTTAGTACCTGCGGG  
ATTATTAACAGTACCTTTTTTAGAGAATGTTAATAAATCCAAAATCCATTTGCGCGTCCAGTAGCGACGACTGTCTTTT  
TGATTGGTACCGCAGTCGCCCTTTGGTTGGGCATTGGTGCAACATTACCTATTGATAAATCCCTAACTTTAGGTCTTTTT

-----  
ATGATTGAAGTTTTTCTATTTGGAATCGTGTTAGGTCTAATTCCTATTACTTTGGCTGGATTATTCGTAACCTGCATATTT  
ACAATATAGGCGTGGTGATCAGTTGGACCTT-----  
ATGCTTACTATAACT-----  
AGTTATTTCCGTTTTCTATTAGCGGCTTTAACTATAACCTCAGCTCTATTTATTGGTCTGAGCAAGATA-----  
CGACTTATT-----

-----  
ATGGATATAGTAAGTCTTGCTTGGGCTGCTTTAATGGTAGTCTTTACTTTTTCCCTTTCACTCGTAGTGTGGGGAAGAAG  
TGGACTC---ATGATTATTCGTTCCGCCGAACCA-----GAAGTTAAA-----  
ATTTTGGTAGATAGGGATCCCGTAAAACTTCGTTTCGAGGAATGGGCCAGACCGGGTCAATTTCTCAAGAACAATAGCTAA

AGGGCCTGATACTACCCTTGGATCTGGAACCTACATGCTGATGCTCACGATTTTCGATAGCCATAACAGTGATTTGGAGG  
AGATCTCTCGAAAAGTATTTAGTGCACATTTCCGTTCAACTCTCCATCATCTTTCTTTGGCTGAGCGGCATGTATTTCCAC  
GGTGCTCGTTTTTCTAATTATGAAGCGTGGCTAAGTGATCCAACCTCACATTGGGCCTAGTGCCAGGTGGTTTTGGCCAAT  
AGTGGGCCAAGAAATATTAATGGTGACGTAGGCGGGGTTCCGAGGAATACAAATAACCTCTGGTTTTTTTTAGATTT

GGCGAGCATCTGGAATAACTAGTGAATTACAACCTCTATTGTACAGCAATTGGGGCATTGGTCTTTGCAGCGTTAATGCTT  
TTTGCTGGTTGGTTTTATTATCATAAAGCGGCGCCAAAATTGGCTTGGTTTTCAAGATGTAGAATCTATGCTGAATCACCA  
TTTGGCAGGGCTACTAGGACTTGGGTCTCTCTTTGGGCGGGGCATCAAGTACATGTATCTTTACCGATTAACCAATTTT  
TAAACGCTGGAGTAGATCCTAAAGAGATACCACTTCCTCATGAATTTATCTTGAATCGAGATCTTTTGGCTCAACTTTAT

CCCAGTTTTGCGGAGGGAGCAACCCCATTTTTACCTTGAATTGGTCAAAAATATGCGGACTTTCTTACTTTTTCGTGGAGG  
ATTAGATCCAGTAACTGGGGTCTGTGGCTGACTGATATTGCCCATCACCATTTAGCTATTGCAATTTCTTTTCTGATAG  
CGGGTCACATGTATAGGACCAACTGGGGTATTGGTTCATGGACTAAAAGATATTTTAGAAGCTCATAAAGGTCCATTTACA  
GGTCAGGGCCATAAAGGCCTATATGAGATCCTAACAACGTTCATGGCATGCTCAATTATCTCTTAACTTAGCTATGTTAGG

CTCTTTAACCATTGTTGTAGCTCACCATATGTATTCCATGCCCTTATCCGCTACTAGCTACTGACTATGGTACACAAC  
TGTCAATGTTTACACATCACATGTGGATTGGTGGATTTCTCATAGTTGGTGTCTGCCGCGCATGCAGCCATTTTTTAGGTA  
AGAGATTATGATCCAACCTACTCGGTACAACGATCTATTAGATCGTGTCTTAGACATCGTGATGCAATCATATCCCATCT  
CAACTGGGCATGTATATTTCTAGGCTTTTACAGTTTTGGTTTTGTATATTCATAATGATACCATGAGCGCTTTAGGGCGTC

CTCAAGATATGTTTTAGATACCGCTATAACAATTACAACCC---  
GTTTTTGGCTCAATGGATACAAAACACCCATGCTTTAGCACCTGGTGCAACGGCTCCTGGTGCAACAGCAAGTACCAGTTT  
AACTTGGGGGGTGGTGATTTAGTGGCAGTGGGTGGCAAGGTGGCTTTGTTGCCTATTCCATTAGGAACCGCGGATTTCT  
TGGTACATCACATTCATGCATTTACGATTCATGTGACGGCACTGATACTCTTGAAAGGTGTTCTATTTGCTCGCAGTTCC

CGTTTTGACACCGGATAAAGCAAACCTTGGTTTTCGTTTTCTTGTGATGGACCTGGAAGAGGGGGTACATGTCAAGTATC  
GGCCTGGGATCATGTCTTCTTAGGACTATTCTGGATGTACAATGCAATTTCCGTTAGTAATATTCCATTTAGTTGGAAAA  
TGCAGTCAGATGTTTGGGGCAGTGTAAAGTATCAAGGGGTAGTAACCTCATATCACGGGAGGAACTTTGCGCAAAGTTCT  
ATTACTATTAATGGGTGGCTCCGCGATTTCTTATGGGCACAGGCATCCCAGGTAATTCAGTCTTATGGTTCTTCATTATC

TGCATATGGCCTTTTTTCTAGGTGCTCATTTTGTCTGGGCTTTTAGTTTTAATGTTTCTATTCT---  
AGTGGACGTGGTTATTGGCAAGAACTTATTGAATCCATCGTTTTGGGCTCATAATAAATTTAAAGTTGCTCCTGCTACTCA  
GCCGAGAGCCTTGAGCATTATAACAAGGACGTGCTGTAGGAGTAACCCATTACCTTCTGGGTGGAATTGCCACAACATGGG  
CATTCTTCTTAGCAAGAATTATTGCAGTAGGA---

ATGGCATTACGATTTCCAAGGTTTAGCCAAGGCTTAGCTCAGGACCCCACTACTCGTCTGATTTGGTTTTGGTATTGCTAC  
CGCACATGACTTCGAGAGTCATGATGATATTACTGAGGAACGTCTTTATCAGAATATTTTTGCTTCTCACTTTGGTCAAT  
TAGCAATAAATTTTTCTGTGGACTTCCGGAAATCTGTTTTCATGAGTTGGCAAGGAAATTTGAGTCGTGGGTACAGGAC  
CTTTTACATGTAAGACCTATTGCTCATGCAATTTGGGATCCTCATTTTTGGTCAACCGCCGTGGAAGCTTTTACTCGAGG

GGGTGCTCTTGGCCCAGTGAATATCGCTTATTCTGGTGTTTATCAGTGGTGGTATAACAATCGGTTTACGCACTAATGAAG  
ATCTTTATACTGGTGCTCTTTTTCTATTATTTCTTTCTGCCATATCCTTAATAGCAGGTTGGTTACACCTACAACCGAAA  
TGGAAACCGAGCGTTTTCTGGTTCAAAAATGCCGAATCTCGTCTGAATCATCATTTGTCAGGACTCTTTGGCGTAAGTTC  
CTTGGCTTGGACAGGGCATTTAGTTCAT

Nuphar

CAGATCCCGCTACTAAGAAAGAGGTTCACTTCTTAAAATATCCTATATATGTAGGTGGGAACAGGGGAAGGGGTGAGATT  
TATCCCGATGGAAGCAAGAGTAACAATACAGTCTATAATGCTTCAGCAGCAGGTATAGTAAGTAAAATAGTACGTAAAGA  
A---  
AAAGGTGGATATGAAATAACCATAGCTGATGCATCGAATGGACAGCAAACGGTTGATATTATACCTCGAGGACCAGA  
ACTCTTTGTTTCTGAAGGTGAATACATCAAGCTTGTATCAGCCATTAACAAGTAATCCCAATGTAGGTGGTTTTGGTCAAGGCG

ATGCGGAAATAGTACTTCAAGATCCATTGCGTATCCAAGGCCTTTTGTCTTCTTAGTATCCGTTATTCTGGCGCAAATC  
TTTTTGGTTCTT---AAAAAGAAACAGTTTGGAGAAGGTTCAATTAGCCGAAATG---AATTTCT-----  
AAAGTATATGATTGGTTCGAGGAGCGTCTCGAGATTCAAGCGATTGCAGATGATATAACTAGTAAATATGTTCCCTCCTCA  
TGTC AATATATTTT CATTGTCTAGGAGGGATCACACTTACTTGTCTTTTAGTACAAGTAGCTACAGGTTTTGCTATGACTT  
TTTACTATCGCCCCGACCGTACAGAAAGCTTTTGCCTCTGTTCAATACATAATGACTGAAGCCAACCTTCGGTTGGTTAATC  
CGATCAGTTTCATCGATGGTCAGCAAGTATGATGGTTCTAATGATGATCCTGCACGATTTTCGTGTTTTATCTCACAGGCGG  
TTTTAAGAAACCACGCGAATTGACGTGGGTACGGGTGTAGTTCTGGCTGTATTGACTGCATCCTTTGGTGTAACTGGTT  
ATTCTTTACCTTGGGACCAAATTGGTTATTGGGCAGTCAAATTTGTAAGTGGCGTACCCGAGGCTATCCCTGTAGTGGGA  
TCGCCTTTGGTAGAGTTATTACGCGGAAGTGTAGCGTGGGTCAATCCACTTTGACCCGTTTTTATAGTTTACACACTTT  
TGATTACCTCTTCTTACTGCCGTATTTATGTTAATGCACCTTCTCAATGATACGTAAGCAAGGTATTTACAGTCTCTTTA-  
--

ATGGGA??AACAAAGAAACCCGACTTGAATGATCCTGTATTAAGAGCTAAATTGGCTAAGGGGATGGGACATAATTATTA  
CGGAGAACCCGCATGGCCTAATGATCTTTTATATATTTTTCCCGTAGTAATTCTAGGTACTATTGCATGTAACGTAGGTC  
TAGCGGTTCTAGAACCATCAATGATTGGTGAACCAGCAGATCCATTTGCAACTCCTTTGGAAATATTACCCGAATGGTAC  
TTCTTTCCCGTATTTCAAATACTCCGTACAGTACCTAATAAATTATTGGGTGTTCTTTTAAATGGTTTTCGGTACCAGCGGG  
ATTATTGACAGTACCCTTTTTGGAAAATGTTAATAAATTCAAAATCCATTCCGTGCGCCAGTAGCTACAACAGTCTTTT  
TGATCGGTACGGCAGTAGCCCTTTGGTTAGGTATTGGAGCAACATTACCTATTGATAAATCTCTAACTTTAGGTCTTTTT

ATGATTGAAGTTTTTTTCAATTTGGAATCGTGTTAGGTCTAATTCCTATTACTTTAGCCGGATTGTTTGTAACTGCATATTT  
ACAATACAGACGCGGTGATCAGTTGGACTTT-----  
ATGCCTACTATAGCT-----  
AGTTATTTTCGGTTTTTCTACTGACTGCTTCAACTATAACCCCGACTCTATTTCATTGGTCTGAGCAAGATA-----  
CGACTTATT-----

ATGGATATAGTAAGTCTCGCTTGGGCTGCTTTAATGGTAGTTTTTACGTTTTCCCTTTCACTCGTAGTATGGGGAAGAAG  
TGGACTC---ATGATTATTCGTTTCGCCGGAACCA-----GAAGTGAAG-----  
ATTTTGGTGGATAGGGATCCCATAAAAACTTCATTTCGAGGAATGGGCCAGACCCGGCCATTTCTCAAGGACAATAGCTAA  
GGGCCCTGATACTACCCTTGGATCTGGAACCTACATGCTGATGCTCACGATTTTCGATAGCCATACCAGTATTGGAGG  
AGATCTCCCGAAAAGTATTTAGTGTCTATTTTCGGTCAACTATCCATCATCTTTCTTTGGCTGAGTGGCATGTATTTCCAT  
GGAGCCCGTTTTTCCAATTATGAAGCATGGCTGAGCGACCCTACTCACATCGGACCCAGTGCCAGGTGGTTTTGGCCAAT  
AGTGGGTCAAGAAATATTGAATGGCGATGTAGGCGGGGTTTTCCGAGGAATACAAATAACCTCTGGATTTTTTTCAGATTT  
GGCGAGCATCAGGAATAACTAGTGAATTACAACCTTTATTGTAAGTGAATTGGAGCATTGGTCTTTGCAGCGTTAATGCTT  
TTTGCCGGTTGGTTCCATTATCACAAAGCTGCTCCAAAATTGGCTTGGTTCCAAGATGTAGAATCCATGTTGAACCACCA  
CTTAGCAGGGTTACTAGGACTTGGGTCTCTTTCTTGGGCAGGGCATCAAGTACATGTATCTTTACCGATTAACCAATTTT  
TGAACGCTGGGGTGGATCCTAAAGAAATACCCTTCCCTCATGAATTTATCTTGAATCGGGATCTTTTGGCTCAACTTTAT  
CCCAGTTTTGCAGAGGGAGCAACCCCGTTTTTACCCTGAATTGGTCAAATATGCGGAATTTCTTACTTTTCGTGGAGG  
ATTAGATCCAGTAACAGGAGGTCTATGGCTAACCAGATATTGCGCACCATCATTGGCTATTGCAATTTCTTTTCTGATAG  
CTGGTCACATGTATAAGACCAACTGGGGCATTGGTTCATGACCTGAAAGATATTTTAGAGGCTCATAAGGGTCCGTTTACA  
GGTGGAGGTCATAAGGGCCTCTATGAGATCCTAACAACGTATGGCATGCTCAATTAGCTCTTAACTAGCTATGTTAGG  
TTCTTTAACCATTGTTGTAGCCCACCATATGACTCTATGCCTCCTTATCCATACCTAGCTACTGATTATGGTACACAAC  
TTTTCGTTGTTACACATCACATGTGGATCGGTGGATTTCTCATAGTTGGTGTGCTGCTGCACATGCAGCTATTTTTATGGTA  
AGAGACTATGATCCAATACTCGATACAACGATCTATTAGATCGTGTCTTAGGCACCGAGATGCAATCATATCACATCT  
TAACTGGGCGTGTATATTTCTAGGCTTTACAGTTTTGGCTTGATATTCATAATGATACCATGAGCGCTTTGGGGCGTC  
CCCAAGATATGTTTTTCAGATACCGCTATAACAATTACAACCT---  
ATCTTTGCTCAATGGATACAAAACACTCATGCTTTAGCACCTAGCGCAACAGCTCCTGGTGCAACAACAGGCACCAGCTT  
GACTTGGGGGGGTGGTGATTTAGTAGCAGTAGGCGGCAAAGTAGCTTTGTTACCTATTCCACTGGGAACCCGAGATTTTT  
TGATACATCATATTTTATGCATTTACGATCCATGTGACTGTATTGATACTACTGAAAGGTGTTCTATTTGCCCGCAGTTCT  
CGTTTTGATACCTGATAAAGCAAATCTTGGTTTTCGTTTTCCCTTGTGACGACCCGGAAGAGGGGGAACATGCCAAGTATC  
CGCTTGGGATCATGTCTTCTAGGTCTATTCTGGATGTACAATGCGATTTTCGGTAGTAATATTCCATTTTCAGCTGGAAAA  
TGCAGTCAGATGTTTGGGGTAGTATAAGTGTCAAGGGGTGGTAACTCATATCACGGGGGAAACTTTGCACAGAGTTCC  
ATTACAATTAATGGGTGGCTACGAGATTTTTTATGGGCACAGTCTCTCAAGTAATCCAGTCTTATGGCTCTTCAATTATC  
CGCCTATGGTCTCTTTTTCTTAGGTGCTCATTTTGTCTGGGCCTTCAGTTTTAATGTTTCTATTT---  
AGTGGTCTGGTTATTGGCAAGAACTCATTGAATCCATCGTCTGGGCTCATAACAAATTAAGGTTGCTCCTGCTACTCA  
GCCTAGAGCCTTGGACATTATAACAAGGACGTGCTGTAGGAGTAACCCATTACCTTCTGGGTGGAATTGCCACAACATGGG  
CATTCTTCTTAGCAAGAATTATTTTCAGTAGGA---  
ATGGCATTAAAGATTTCCAAGGTTTAGCCAAGGCTTAGCTCAGGACCCCACTACTCGTCTGATTTGGTTTTGGTATTGCTAC  
CGCACATGACTTCGAGAGTCATGATGATATGACCGAGGAACGTCTTTATCAGAATATTTTTGCTTCTCACTTCGGGCAGT

TAGCAATAATCTTTCTGTGGACTTCCGGCAATCTGTTTCATGTGGCTTGGCAAGGAAATTTTGGAGTCATGGGTACAGGAC  
CCCTTACATGTAAGACCCATTGCTCATACTATTTGGGATCCTCATTTTGGTCAACCGGCTGTAGAAGCTTTTACTCGAGG  
GGGTGCTCTTGGCCCAGTGAATATTGCTTATTCCGGTGTATCAATGGTGGTATAACAATCGGCATGCGCACCAACGAAG  
ATCTTTATACTGGAGCTCTTTTTCTATTATTTATTTCTGCCATATCCTTAGTAGCGGGTTGGTTACATCTACAACCCAAA  
TGGAAGCCAAGCGTTTCGTGGTTCAAAAATGCCGAATCTCGTCTCAATCATCATTTGTCAGGGCTCTTCGGAGTAAGCTC  
CTTGGCTTGGGCAGGACATTTAGTTTCAT

Nymphaea

CAGATCCCGCTACTAAGAAAGAGGTTCACTTCTTAAAATATCCTATATATGTAGGTGGGAACAGGGGAAGGGGTACAGATT  
TATCCTGATGGGAGCAAGAGTAACAATACAGTCTATAATGCTTCAGCAGCAGGGATAGTAAGTAAAATAGTACGTAAAGA  
AAAGAAAGGTGGATATGAAATAACCATATCTGATGCATCGAATGGACACGAAACGGTTGATATTATACCTCCAGGACCAG  
AACTTCTTGTGTTCTGAAGTGAATACATCAAGCTTGATCAGCCATTAACAAGTAATCCCAATGTAGGTGGTTTTGGTCAA  
GGCGATGCAGAAATAGTACTTCAAGATCCATTGCGTATCCAAGGCCTTTTGTCTTCTTAGCATCTGTTATTCTGGCGCA  
AATCTTTTTGGTTCTT---AAAAAGAAACAGTTTGAGAAGGTTCAATTAGCCGAAATG---AATTTT---  
ATGAGTAAAGTATATGATTGGTTCGAGGAGCGTCTCGAGATTCAAGCGATTGCAGATGATATAACTAGTAAATATGTTCC  
TCCTCATGTCAATATATTTTATTGCTTAGGAGGGATCACACTTACTTGTCTTTTAGTACAAGTAGCTACGGGTTTTGCTA  
TGACTTTTTACTATCGCCCCACCGTACAGAAGCTTTGCTCTGTTCAATACATAATGACTGAAGCCAACCTTCGGTTGG  
TTAATCCGATCAGTTCATCGATGGTCAGCAAGTATGATGGTTCTAATGATGATCCTGCACGTATTTCTGTGTTTATCTCAC  
AGGTGGTTTTAAGAAACCACGTGAATTGACTTGGGTTACGGGCGTAGTCTGGCTGTGTTGACTGCATCCTTTGGGGTAA  
CTGGTTATTCTTTACCTTGGGACCAAATTGGGTATTGGGCAGTCAAATTTGTAACAGGTGTACCTGAGGCTATCCCTATA  
GTGGGATCGCCCTTGGTAGAGTTATTACGCGGAAGTGTAGTGTGGTCAATCCACTTTGACCCGCTTTTATAGTTTTACA  
CACTTTTGTATTACCTCTTCTTACTGCCGATTTTATGTTAATGCACCTTTTCAATGATACGTAAGCAAGGTATTTACAGTCT  
CTTTA---  
ATGGGAGTAACAAAGAAACCCGACTTGAATGATCCTGTATTAAGAGCAAAATTTGGCTAAGGGGATGGGACATAATTATTA  
TGGGGAACCGGCATGGCCTAATGATCTTTTATATATTTTCCCCTAGTAATTCTAGGTACTATTGCATGTAACGTAGGTC  
TAGCGGTTCTAGAGCCATCAATGATTGGTGAACCGGCAGATCCATTTGCAACTCCTTTGGAAATATTACCCGAATGGTAC  
TTCTTTCCCCTATTTCAAATACTCCGTACAGTACCCAATAAGTTATTGGGTGTTCTTTTAAATGGTTTTCGGTACCAGCGGG  
ATTATTGACAGTACCCTTTTTGGAAAATGTTAATAAAATCCAAAATCCATTCCGTCGCCCAGTAGCTACAACAGTCTTTT  
TGATTGGTACGGCAGTAGCCCTTTGGTTAGGTATTGGAGCAACATTACCTATTGATAAGTCTCTAACTTTAGGTCTTTTT  
CAAATTCAAATAGATCTTGAATACTAAGG-----  
ATGATTGAAGTTTTTTTTTATTGGAATCGTGTAGGTCTAATTCCTATTACTTTAGCCGGATTGTTTGTAAGTGCATATTT  
ACAATACAGACGCGCGCATGAGTTGGACTTT-----  
ATGCCTACTATAGTT-----  
AGTTATTTTCGGTTTTCTACTGACTGCTTCAACTATAACCCCAGCTCTATTTATTGGTCTGAGCAAGATA-----  
CGACTTATT-----

ATGGATATAGTAAGTCTCGCTTGGGCTGCTTTAATGGTAGTTTTTACGTTTTCCCTTTCACTCGTAGTATGGGGAAGAAG  
TGGACTC---ATGATTATTCGTTTCGCCGGAACCA-----GAAGTGAAG-----  
ATTTTGGTGGATAGGGATCCCCTAAAACCTTCAATTTGAGGAATGGGCCAGACCCGGCCATTTCTCAAGGACAATAGCTAA  
GGGCCCTGATACTACCACTTGGATCTGGAACCTACATGCTGATGCTCATGATTTTCGATAGCCATACCAATGATTTGGAGG  
AGATCTCCCAGAAAAGTATTTAGTGCTCATTTCGGTCAACTATCCATCATCTTTCTTTGGTTGAGTGGCATGTATTTCCAT  
GGAGCCCGTTTTTCCAATTATGAAGCGTGGCTGAGCGACCCTACTCACATCGGACCCAGTGGCCAGGTGGTTTTGGCCGAT  
AGTGGGTCAAGAAATATTGAATGGCGATGTAGGCGGAGGTTCCGAGGAATACAAATAACCTCTGGATTTTTTCAGATTT  
GGCGAGCGTCCGGAATAACTAGTGAATTACAACCTTTATTGTAAGTGAATTTGGAGCATTGGTCTTTGCAGCGTAAATGCTT  
TTTGCCGGTTGGTTCCATTATCACAAAGCTGCTCCAAAATTTGGCTTGGTTCCAAGATGTAGAATCCATGTTGAACCACCA  
CTTAGCAGGATTAAGGACTTGGGTCTCTTTCTTGGGCAGGGCATCAAGTACATGTATCTTTACCTATTAACCAATTTT  
TGAACGCTGGGGTGGATCCTAAGGAAATACCACTTCCCTCATGAATTTATCTTAAATCGGGATCTTTTGGCTCAACTTTAT  
CCCAGTTTTGCAGAGGGAGCAACCCCGTTTTTACCCTGAATTTGGTCAAATAACGCGGAATTTCTTACTTTTTCGTGGAGG  
ATTAGATCCAGTAACAGGAGGTCTATGGCTAACCAGTATTGCACACCATCATTGGCTATTGCAATTTCTTTTCTGATAG  
CTGGTCACATGTATAAGACCAACTGGGGCATTGGTCATGACCTGAAAGATATTTTGGAGGCTCATAAGGGTCCGTTTTACA  
GGTGAGGGTATAAGGGCTCTATGAGATCCTAACAACGTCATGGCATGCTCAATTAGCTCTGAATCTAGCTATGTTGGG  
TTCTTTAACCATTGTAGTAGCCCACCATATGTAAGTCTATGCCCCCTTATCCATACCTAGCTACTGATTATGGTACACAAC  
TTTCGTTGTTTACACATCACATGTGGATCGGTGGATTTCTCATAGTTGGTGTGCTGCACATGCAGCAATTTTTATGGTA  
AGAGACTATGATCCAACCTACTCGATAACAACGATCTATTAGATCGTGTCTTAGGCACCGAGATGCAATCATATCACATCT  
TAACTGGGTGTGTATATTTCTAGGCTTTTACAGTTTTGGCTTGTATATTCATAATGATACCATGAGCGCTTTGGGGCGTC  
CCCAAGATATGTTTTAGATACCGCTATAACAATTACAACCT---  
ATCTTTGCTCAATGGATACAAAACACTCATGCTTTAGCACCTAGCGCAACAGCTCCTGGTGAACAGCGGGCACCAGCTT  
GACTTGGGGGGTGGTGAATTTAGTAGCAGTAGGCGGCAAAGTAGCTTTGTTACCTATTCCACTGGGAACCGCAGATTTTT

TGGTACATCACATTCATGCATTTACGATCCATGTAAGTGTATTGATACTACTGAAAGGTGTTCTATTTGCCCGCAGTTCT  
CGTTTTGATACCTGATAAAGCAAATCTGGGTTTTTCGTTTTCCCTTGTGACGGACCCGGAAGAGGGGGAACATGCCAAGTATC  
CGCCTGGGATCATGTCTTCTAGGTCTATTCTGGATGTACAATGCGATTTCCGGTAGTAATTTTCCATTTTCAGCTGGAAAA  
TGCAGTCAGATGTTTTGGGGTAGTATAAGTGATCAAGGGGTGGTAACTCATATCACGGGGGAAACTTTGCACAGAGTTCC  
ATTACAATTAATGGGTGGCTACGAGATTTTTTATGGGCACAGTCCTCCCAAGTAATCCAGTCTTATGGCTCTTCATTATC  
CGCCTATGGTCTTTTTCTTCTTAGGTGCTCATTTTGTCTGGGCCTTCAGTTTTAATGTTTTCTATTT---  
AGCGGTGCTGGTTATTGGCAAGAACTCATTGAATCCATCGTCTGGGCTCATAACAAATTTAAAGTTGCTCCTGCTACTCA  
GCCTAGAGCCTTGAGCATTATACAAGGACGTGCTGTAGGAGTAACCCATTACCTTCTGGGTGGAATTGCCACAACATGGG  
CATTCTTCTTAGCAAGAATTATTTTCAGTAGGA---  
ATGGCATTAAAGATTTCCAAGGTTTAGCCAAGGCTTAGCTCAGGACCCACTACTCGTCGTATTTGGTTTTGGTATTGCTAC  
CGCACATGACTTCGAGAGTCATGATATCACCAGGGAACGTCTTTATCAGAATATTTTTGCTTCTCACTTCGGGCAGT  
TAGCAATAATCTTTCTGTGGACTTCCGGCAATCTGTTTCATGTGGCTTGGCAAGGAAATTTGAGTCATGGGTACAGGAC  
CCCTTACATGTAAGACCCATTGCTCATACTATTTGGGATCCTCATTTTGGTCAACCGGCTGTAGAAGCTTTTACTCGAGG  
GGGTGCTCTTGGCCCAGTGAATATTGCTTATTCCGGTGTATTCAATGGTGGTATAACAATCGGCTTGCACACCAATGAAG  
ATCTTTATACTGGAGCTCTTTTTCTATTATTTATTTCTGCCATATCTTTAGTAGGGGGTTGGTTACATCTACAACCCAAA  
TGGAAGCCAAGCGTTTCGTGGTTCAAAAATGCCGAATCTCGTCTCAATCATCATTTGTCAGGGCTCTTCGGAGTAAGCTC  
CTTGGCTTGGGCAGGACATTTAGTTCAT

Oenothera

CGGACCCCGCTACTAATAAAGATGTTCACTTCTTAAAATACCCCATATATGTCGGCGGGAATAGAGGAAGGGGACAGATT  
TATCCCGACGGGAGCAAGAGTAACAATACAGTTTATAATGCGACAGCCGCTGGGATAGTAAGTAAAATAATACGAAAAGA  
A---

AAGGGGGGGTATGAGATAACCATAACGGATGCCTCGGATGGGCGTCAAGTGGTTGATATTATCCCCTCAGGACCCGAAC  
TCTTGTTCAGAGGGCGAATCTATCAAACCTTGATCAGCCATTAACAAGTAATCCTAATGTGGGTGGTTTTGGGCAAGGGG  
ATGCAGAAGTAGTACTTCAAGATCCATTACGTGTCCAAGGCCTTTTGTCTTCTTGGCATCTGTTATTTGGCACAAATC  
TTTTTGGTCTT---AAGAAGAAACAGTTTGAAGAAGTTCAATTGTCTGAAATG---AATTTCT---

ATGAGTAAAGTCTATGATTGGTTTCGAAGAACGTCTCGAGATTCAGGCGATTGCGGATGATATAACTAGTAAATATGTTCC  
TCCTCATGTCAACATATTTTATTGTCTGGGGGGAATTACGCTTACTTGTTTTTTAGTACAAGTAGCTACGGGATTTGCTA  
TGACTTTTTACTACCGCCCAACAGTCACTGAGGCTTTTGTCTCGTTCCCTTACATAAAGACTGAAGCTAACTTTGGTTGG  
TTAATCCGCTCCGTTTCATCGCTGGTCCGCAAGTATGATGGTCTTAATGATGATCTTGCACGTATTTCTGTGCTATCACAC  
AGGTGGTTTTAAAAAACCTCGCAATTAACCTGGGTACAGGCGTGGTTCTAGCTGTATTGACTGCATCGTTTTGGTGTAA  
CTGGGTATTCTTACCTTGGGACCAAATTGGTTATTGGGCAGTCAAAAATTGTAACAGGCGTGCCGGACGCTATTCTGTGA  
ATAGGATCTCCCTTGGTAGAGTTATTACGAGGAAGTGCTAGTGTGGGACAATCCACTTTGACTCGTTTTTATAGTTTTACA  
CACTTTTGTATTACCTCTTCTTACGGCCGTATTTATGTTAATGCATTTTCTAATGATACGTAAGCAAGGGATTTCTGGTC  
CTTTA---

ATGGGAGTAACAAAAAACCTGACTTGAATGATCCTGTATTAAGAGCTAAATTTGGCTAAGGGGATGGGTATAAATTATTA  
CGGCGAACCCGCATGGCCCAACGACCTTTTATATATTTTTCCAGTAGTAATTTCTGGGTACGATTGCCTGTAACGTGGGCT  
TAGCGATTCTGGAACCATCAATGCTTGGTGAACCCGCCGATCCCTTTGCACTTCTTTGGAAATATTACCTGAATGGTAT  
TTCTTTCCCGTATTCCAAATACTTTCGTACAGTACCCAATAAGTTATTGGGCGTTCTTTTAAATGGTTTTAGTACCTTCCGG  
ATTATTAACAGTACCTTTTTTGGAGAATGTTAATAAATTTCAAATCCATTCCGTCGTCCAGTAGCGACAACGGTCTTTT  
TGATTGGGACTGTAGTAGCCCTTTGGTTGGGTATTGGAGCAACATTACCTATCGATAAATCCCTAACCTTAGGTCTTTTT  
-----

ATGATTGAAGTTTTTCTATTTGGAATTGTCTTAGGTCTAATTCCTATTACTTTAGCTGGATTATTTGTAAGTGCATATTT  
ACAATACAGGCGTGGCGATCAGCTGGACCTT-----

ATGCTTACTATAACT-----

AGTTTTTTTCGGTTTTCTACTAGCGGCTTTAACTATAACCTCAGTTTTATTTATTGGTCTGACCAAGATA-----

CGACTTATT-----

ATGGATATAGTCAGTCTTGCTTGGGCTGCTTTAATGGTAGTCTTTACATTTTCCCTTTCACTGGTAGTATGGGGAAGGAG  
TGGGCTC---ATGATTATTCGTTTCGCCGGAACCA-----GAAGTCAAA-----

ATTTTGGTAGATAGGGATCCCATAAAAACGTCGTTTCGAGGAATGGGCTAAACCGGGCCATTTCTCAAGAACAATAGCTAA  
GGGCCCTGAGACTACCACTTGGATCTGGAACCTACATGCTGATGCTCACGATTTTCGATAGCCATAACAGCGATGTGGAGG  
CCATCTCTCGAAAAGTATCTAGTGCCCATTTTGGGCAACTATCCCTTATCTTTTTGTGGCTGAGTGGCATGTATTGGGGG  
TTTGCCTTTTTTCCAATTATGAAGCATGGCTAAGCGACCCTACTCACATTGGACCTAGTGCTCAGGTGGTTTTGGCCAAT  
AGTGGGCCAAGAAATATTGAATGGCGATGTGGGCGGGGTTCCGAGGAATACAAATAACCTCTGGGTTTTTTTCAGCTTT  
GGAGAGCGTCTGGAATAACTAGTGAATTACAACCTATTGTACCGCAATAGGCGCATTAACTTTGCAGCCTTAATGCTT  
TTTGTGGTTGGTTCCATTATCACAAGCGGCTCCAAAATTTGGCCTGGTTCCAAGATGTCCAATCTATGTTGAATCACCA  
TTTAGCAGGGCTACTAGGACTGGGTCTCTTTCTTGGGCGGGGCATCAAGTACATGTATCTTTACCAATTAACCAATTTCT

TAAACGCGGGAGTAGATCCTAAAGAGATCCCACCTTCTCCATGAATTTATCTTGAATCGGGATCTTTTGGCTCAACTTTAT  
CCGAGTTTTGCGGAGGGAGCAACTCCATTTTTTACCTTGAATTGGTCAAATATGCGGAATTTCTGACTTTTCGCGGAGG  
ATTAGATCCAGTAACTGGGGTCTATGGCTGACTGATATTGCTCATCATCATTTGGCTATTGCAATTTCTTTCTTGATAG  
CGGGTCACATGTATAGGACCAACTGGGGCATTGGTCATGGTCTAAAAGATATTTTAGAGGCTCATAAAGGTCCATTTACA  
GGCCAGGGCCATAAAGGCCTATATGAGATCCTAACAACGTCATGGCATGCTCAATTATCTCTTAACCTCGCTATGTTAGG  
CTCTTTAACGATTGTTGTAGCTCACCATATGTATTCCATGCCCCCTTATCCATATCTAGCTACTGACTATGGTACCCAAC  
TGTCATTGTTACACATCACATGTGGATTGGTGGATTTCTCATAGTTGGTGTGCTGCCGCGCATGCTGCTATTTTTATGGTA  
AGAGATTATGATCCAACCTACTCGATAACAACGATCTATTAGATCGTGTCTTAGGCATCGCGATGCAATCATATCACATCT  
CAATTGGGTATGTATTTTTCTAGGCTTTACAGTTTTGGTTTTGTATATTTCATAACGATACCATGAGCGCTTTAGGACGCC  
CTCAAGATATGTTTTCTGATACCGCTATAACAATTACAACC---

GTCTTTGCTCAATGGATACAAAACCCATGCATTAGCGCCCGGTGCAACGGCCCCTGGTGCAACAACAAGCACCAGTTT  
GGCTTTGGGGAGGCGGTGATTTAGTAGCAGTGGGGGGCAAGGTTGCTTTGTTACCGATTCCCTTAGGAACCGCAGATTTTT  
TGGTCCATCACATTCATGCATTTACGATTCATGTAACGTATTGATACTCTTGAAGGGTGTCTATTTGCTCGTAGCTCT  
CGTTTTGATACCGGATAAAGCAAATCTTGGCTTTTCGTTTTCCCTTGTGATGGACCGGGACGGGGAGGGACATGTCAAGTATC  
CGCTTTGGGATCATGTCTTCTTAGGGCTATTCTGGATGTACAATGCAATTTTCGGTAGTCATATTTTATTTCAGTTGGAAAA  
TGCAGTCAGACGTTTGGGGTAGTATAAGTGATCAAGGAGTGGTAACTCATATAACGGGAGGAAACTTTGCCAGAGTTCC  
ATCACTATTAATGGTTGGCTCCGCGATTTCTTATGGGCACAGGCATCCCAAGTAATTCAGTCTTATGGATCTTCATTATC  
TGCATATGGCCTTTTTTCTAGGTGCTCATTGTTGATGGGCTTTTAGCTTAATGTTTCTATTTTTCATGCGGACGTGGTT  
ATTGGCAAGAACTTATTGAATCCATCGTTTGGGCTCATAATAAATTTAAAGTTGCTCCTGCTACCCAGCCTAGAGCCTTG  
AGCATTGTACAAGGACGTACTGTAGGAGTAACCCATTACCTTCTGGGTGGAATTGCCACAACATGGGCATTCTTCTTAGC  
AAGAATTATTGCAGTAGGA---

ATGGCATTAAAGATTTCCAAGGTTTAGCCAAGGCTTAGCTCAGGACCCCACTACTCGTCGTATTTGGTTTTGGTATTGCCAC  
CGCGCATGACTTTGAGAGTCATGATGATATCACCGAAGAACGTCTTCATCAGAATATTTTTGCTTCTCACTTCGGGCAAT  
TAGCAATCATTTTTCTGTGGACTTCCGGAAATCTCTTTCATGTAGCTTGGCAAGGAAATTTGAGGCATGGGTACAGGAC  
CCTTTACATGTAAGACCTATTGCTCATGCAATTTGGGATCCTCATTGTTGGTCAACCGGCTGTGGAAGCTTTTACTCGAGG  
GGGTGCTCTCGGCCAGTGAATATCGCTTATTCTGGTGTGTTATCAGTGGTGGTATAACAATGGTTTTACGTACTAACGAAG  
ATCTTTATACAGGAGCGCTTTTTCTATTATTTCTTCTGCTATATCCTTAATAGCGGGTTGGTTACACCTACAACCGAAA  
TGGAAACCGAGCGTTTCATGGTTCAAAAATGCCGAATCTCGTCTCAACCATCATTTGTGCGGGGCTATTCCGGTGAAGTTC  
TTTTGGCTTGGACAGGGCATTTAGTACAT

Oryza

CCGACCCTGCTATGAAGAAAGACGTTTCATTTCTTAAAATATCCCATATATGTGGGGGAAACCGAGGAAGGGGACAGATC  
TATCCTGATGGTAGCAAGAGTAACAATACGGTCTATAATGCAACGTCAACAGGTGTAGTAAGAAAAATACTGCGTAAAGA  
A---

AAGGGGGATATGAAATATCCATAGTCGATGCATCGGATGGACGCCAAGTGATTGATCTTATACCTCCCGGTCCAGA  
ACTTCTTGTTCAGAGGGGAATCGATCAAGCTTGATCAACCATTAACAAGTAATCCTAATGTGGGAGGGTTTGGT  
CAGGGGGATGCAGAAATAGTGCTTCAGGATCCATTACGCGTTCAAGGCCTTTTGTCTTCTTCGCATCCGTTATTTTGGCACAAGTT  
TTTTTGGTTCTC---AAAAAGAAACAGTTTGAAGGTTCAATTGTACGAAATG---AATTTCT---

ATGAGTAAAGTATATGATTGGTTTTGAGGAACGCTTTGAGATTGAGGCAATTGCAGATGATATAACTAGTAAATATGTTCC  
TCCTCATGTCAACATATTTTATTGTTTGGGGGAATTACACTTACTTGTCTTCTAGTACAAGTTGCTACCGGTTTTGCTA  
TGACTTTTTACTATCGCCCAACCGTTACAGAGGCTTTTTCTCGGTTCAATACATAATGACCGAGGCCAACTTTGGTTGG  
TTAATCCGATCAGTTCATCGATGGTCAGCAAGTATGATGGTTCTAATGATGATCCTGCACGATTTTCGTGTGTATCTCAC  
AGGTGGGTTTTAAAAACCCCGCAATTAACCTGGGTCACTGGTGTGGTTTTAGCTGTATTAACCTGCATCGTTTTGGTGTAA  
CTGGTTATTCTTTACCTTGGGATCAAATTGGTTATTGGGCAGTCAAATTTGTGACAGGTGTGCCTGACGCGATTCCGGTA  
ATAGGATCACCTTTAGTGGAGTTATTACGTGGAAGTGCTAGTGTGGGTCAATCCACTTTGACTCGTTTTTATAGTTTTACA  
TACCTTTGTACTTCTCTGCTTACTGCCGTATTTATGTTAATGCACCTTCTAATGATACGTAAGCAAGGTATTTCCGGCC  
CTTTA---

ATGGGAGTAACAAGAAACCTGACTTAAACGATCCTGTATTAAGAGCAAAATAGCTAAAGGGATGGGACATAATTATTA  
CGGGGAACCCCGGTGGCCCAACGATCTTTTATATATTTTTCCAGTAGTAATTTAGGTAATTTAGGTAATTTGATGTAATGTAGGTT  
TAGCGGTTCTCGAGCCGTCAATGATTGGTGAACCGGCGGATCCGTTTGAACCTCCTCTGGAAATATTACCCGAGTGGTAC  
TTCTTTCCCGTGTTCAAATACTCCGTACAGTACCTAATAAGTTATTGGGCGTTCTCTTAATGGTTTTCTGTGCCGACGGG  
CTTATTGACAGTACCTTTTCTAGAGAATGTCAATAAATTTCCAAAATCCATTTTCGTGCGCCAGTAGCTACAACCGTTTTTT  
TAATCGGTACTGCAGTAGCTCTTTGGTTAGGTATTGGAGCAACATTACCCATTGAAAAATCCTTAACCTTTAGGTCTTTTT

ATGATTGAAGTTTTTCTATTTGGAATCGTCTTAGGCCTAATTCCTATTACTTTAGCGGGATTATTCGTGACTGCGTATTT  
GCAATACAGACGTGGGGATCAGTTGGATCTT-----

ATGCTTACTATAACT-----

AGTTATTTCCGGTTTTCTATTGGCTGCTTTAACTCTAACCCCTAGCTCTATTTATTGGCTTGAACAAGATA-----

CGTCTTATT-----

ATGGATATAGTAAGTCTCGCTTGGGCTGCTTTAATGGTAGTCTTTACATTTTCTCTTTCACTAGTAGTATGGGGGAGGAG  
TGGACTC---ATGATGATTCGTTTCGCCGGAACCA-----GAAGTAAAA-----  
ATTGTTGTGGATAGGGATCCTGTAAAAACATCTTTTGGAGGAATGGGCCAGACCCGGCCATTTCTCAAGAACACTAGCTAA  
GGGCCCTGATACTACCACCTTGGATCTGGAACCTACATGCTGATGCTCACGATTTTCGATAGTCATACAGGTGATTTGGAGG  
AGATCTCTCGAAAAGTCTTTAGTGCTCATTTCGGTCAACTCTCCATTATCTTTCTTTGGTTGAGTGGCATGTACTTCCAT  
GGTGCCCGTTTTTCCAATTATGAAGCATGGCTAAGTGATCCTACTCACATTGGACCCAGTGCTCAGGTAGTTTGGCCAAT  
CGTAGGGCAAGAAATATTGAATGGTGATGTAGGCGGGGTTTCCGAGGAATCCAAATATCCTCCGGCTTTTTTCAGATTT  
GGCGAGCATCCGGAATAACTAGTGAATTACAACCTATTGTACCAGCAATCGGTGCATTGATTTTGCATCGTTAATGCTT  
TTTGCTGGGTGGTTCCATTATCACAAAGCCGCTCCCAAATAGCCTGGAGTCATGACGTAGAATCCATGTTGAATCATCA  
CTTAGCAGGGTTATTAGGACTTGGGTCTCTTTCTTGGGCGGGCACCAAATCCATGTATCTTTACCGATTAACCAATTTTC  
TTGACGCTGGGGTTGATCCTAAGGAGATACCACCTTCTCATGAATTTATCTTGAATCGCGACCTTTTGGCTCAACTTTAT  
CCTAGTTTTGCGGAACGAGCAACCCCTTTTTTACCTTGAATTGGTCCAAATACGCAGAATTTCTTAGTTTTCGCGGAGG  
GCTAGATCCAATAACCGCGGTCTATGGTTGAGCGATATTGCGCACCATCATTAGCTATTGCTATTCTTTTCTGATCG  
CAGGTCATATGTATAGGACCAACTGGGGTATTGGTCATGGCCTGAAAGATATTTTGGAGGCTCATAAAGGCCCATTTACA  
GGACAGCGCCATAAAGGTCTCTATGAAATCCTAACACGTCATGGCATGCTCAATTATCTCTTAACCTAGCTATGCTAGG  
CTCTACAACCATTGTTGTAGCTCATCATATGACTCTATGCCCCCTATCCATACCTAGCTACTGACTATGGTACACAAC  
TTTTCTTGTTCACACACCACATGTGGATTGGCGGATTTCTAATAGTTGGTGCTGCTGCACATGCAGCCATTTTTATGGTA  
AGAGACTATGATCCAACGACTCGATAACAACGATCTATTAGATCGTGTCTTAGACACCGTGATGCAATCATATCCACCT  
TAAGTGGGTATGTATATTTCTAGGTTTTTACAGTTTTGGTTTTATACATTCATAATGATACCATGAGTGCTTTAGGTGCTC  
CCCAAGATATGTTTTCGGATACCGCCATACAATTACAACCG---  
ATCTTTGCTCAATGGGTACAAAATCTCCATGCTGGCGCGCTAGGCTAACAGCTCCTGGTGCAACAACAAGTACCAGCTT  
AACGTGGGGAGGTGGCGAGTTAGTAGCAGTAGGCGGCAAAGTTGCTTTGTTACCTATTCCATTAGGAACCGCAGATTTTT  
TAGTCCATCACATTCACGCATTTACAATCCATGTGACTGTATTAATACTTTTGAAGGTGTTTTATTTGCTCGCAGTTCC  
CGTTTGATACCCGATAAAGCAAATCTTGGTTTTCGCTTCCCTTGCATGGGCCTGGGCGAGGGGGAACATGTCAAGTATC  
CGCCTGGGATCATGTTTTCTTAGGTCTATTCTGGATGTACAATCCATTTCCGTTAGTCATTTTCCATTTTCAGTTGGAAAA  
TGCAGTCGGATGTTTTGGGGTACTATAAGTGAATCAAGGGTGGTAACTCATATCACAGGGGGAACATTTGCACAGAGTTCC  
ATTACGATTAATGGGTGGCTCCGAGATTTCTTGTGGGCAGGCAATCCCAAGTAATTCAGTCTTATGTTCTTTCATTATC  
CGCATATGGTCTTTTTTTCTTAGGTGCTCATTGTTGCTGGGCCCTTCAGTTTTAATGTTTTTTTATTCT---  
AGCGGCCGTGGTTATTGGCAAGAACTGATTGAATCTATCGTTTGGGCTCATAACAAATTAAGTTGCTCCTGCTACTCA  
GCCTAGAGCCTTGAGCATTATACAAGGACGTGCTGTAGGAGTAACCCATTACCTTCTGGGTGGAATTGCCACAACATGGG  
CATTCTTCTTAGCGAGAATTATTGCAGTAGGA---  
ATGGAATTAAGATTTCCAGGTTTAGCCAAGGCTTAGCTCAGGACCCCACTACTCGTCGTATTTGGTTTTGGTATTGCTAC  
CGCACATGATTTCGAAAGTCATGATGATATTACTGAGGAACGTCTTTATCAGAACATTTTGTCTTCTCACTTTGGGCAAT  
TAGCAATAATCTTTCTATGGACGTCCGGAATCTGTTTCATGTGCTTGGCAAGGAAATTTGAATCATGGATACAGGAT  
CCTTTACACGTAAGACCTATTGCTCATGCGATTTGGGATCCTCATTGTTGGTCAACCCGCTGTGGAAGCCTTTACTCGAGG  
AGGCGCCGCCGGTCCAGTGAATATCGCCTATTCTGGGGTTTTATCAGTGGTGGTATACAATTGGATTACGGACCAATGAAG  
ATCTTTATACAGGAGCTCTTTTTCTATTATTTCTTTTACCCTATCCTTAATAGGGGGTTGGTTACATCTACAACCCAAA  
TGGAACCAAGCCTTTTCGTGGTTCAAAAACCGGGAATCTCGTCTCAATCATCATTTGTCAGGACTTTTCGGGGTAAGTTC  
TTTGGCTTGGACAGGACATTTAGTTTCAT

Panax

CGGACCCCGCTACTAAGAAAGATGTTCACTTCTTAAAATATCCTATATACGTAGGCGGAAACAGGGGAAGGGGTGAGATT  
TATCCCGACGGGAGCAAGAGTAACAATACGGTTTATAATGCTACAGCAGCAGGTATAGTAGGCAAAATAATACGAAAAGA  
A---  
AAGGGGGTTACGAAATAACCATAACGGATGCATCGGATGGACGTCAAGTGGTTGATATTATCCCTCCAGGGCCAGA  
TCTTGTTCAGAAAGCGAATCTATCAAATTTGATCAACCATTGACGAGTAATCCTAATGTGGGCGGATTTGGTCAGGGAG  
ATGCAGAAATAGTACTTCAAGATCCATTACGTGTCCAAGGCCTTTTGTCTTCTTGGCATCTGTTATTTTGGCACA  
TTTTTGGTTCTT---AAAAAGAAACAGTTTCGAGAAGGTTCAATTGTCCGAAATG---AATTTCT---  
ATGAGTAAAGTCTATGATTGGTTTTGAAGAAGCTCTCGAGATTCAGGCGATTGCGGATGATATAACTAGTAAATACGTTCC  
TCCTCATGTTAACATATTTTATTGTCTAGGAGGTATTACGCTTACTTGTTTTTTAGTACAAGTGGCTACGGGGTTGCTA  
TGACTTTTTACTATCGTCCGACCGTTACTGACGCTTTTGGCTTCCGTTCAATATATAATGACTGAAGCTAATTTTGGTTGG  
TTAATCCGATCAGTTCATCGATGGTCCGCAAGTATGATGGTTCTAATGATGATCCTGCATGTATTTTCGTGTGTATCTCAC  
CGGTGGATTTAAAAAACCTCGCGAATTAACCTTGGGTTACAGGTGTGGTTCTGGCTGTATTGACTGCATCTTTTGGTGTAA  
CTGGTTATTCTTACCTCGGGACCAAATTTGGTTATTGGGCAGTGAAAATTGTAACAGGTGTACCCGAAGCTATTCTGTGA  
ATAGGATCCCTTTGGTGAATATTGCGTGGAAGTGCTAGTGTGGGACAATCCACTTTGACTCGTTTTTATAGTTTTACA  
CACTTTTGTATTGCCGCTTCTTACTGCCGATTTTATGTTAATGCATTTCCAATGATACGTAACAAGGTATTTCTGGTC

CTTTA---

ATGGGAGTAACAAAAAACCTGACTTGAATGATCCTGTATTAAGAGCTAAATTGGCTAAAGGTATGGGTCATAATTATTA  
CGGAGAGCCCGCTGGCCCAATGATCTTTTATATATTTTTCCAGTAGTAATTCTAGGGACTATTGCATGTAACGTAGGCT  
TAGCGGTTCTAGAACCATCAATGATTGGTGAACCAGCAGATCCATTTGCAACCCCTTTGGAAATATTACCCGAATGGTAT  
TTCTTTCCCGTATTTCAAATACTTCGTACAGTACCCAATAAATTATTGGGTGTTCTTTTAATGGTTTTAGTACCCGCGGG  
ATTATTAACAGTACCCTTTTTAGAGAATGTTAATAAATTCAAAATCCATTTTCGTTCGTCCAGTAGCGACAACCGTCTTTT  
TGATTGGTACCGCAGTGGCCCTTTGGTTAGGTATTGGTGAACATTACCTATTGATAAATCCCTAACTTTAGGTCTTTTT

-----  
ATGATTGAAGTTTTTCTATTTGGAATCGTGTTAGGTCTAATTCCTATTACTTTGGCTGGATTATTCGTAACGCATATTT  
ACAATACAGGCGTGGTGTATCAGTTGGACCTT-----  
ATGCCTACTATAACT-----  
AGTTATTTTCGGTTTTTCTACTAGTGGCTTTAACTATAACCTCAGCTCTATTTATTGGTCTTAGCAAGATA-----  
CGACTTATC-----

-----  
ATGGATATAGTAAGTCTTGCTTGGGCTGCTTTAATGGTAGTCTTTACATTTTCCCTTTCACTCGTAGTATGGGGAAGAAG  
TGGACTC---ATGATTATTCGTTCCGCCGAACCA-----GAAGTAAAA-----

ATTTTGGTAGATAGGGATCACATAAAAACTTCTTTTCGAGGAATGGGCCAGACCGGGTCATTTCTCAAGAACACTAGCTAA  
AGGCCCTGACACTACCCTTGGATCTGGAACCTACATGCTGATGCTCACGATTTTCGATAGCCATAACCAGTGATTTGGAGG  
AGATCTCTCGAAAAGTCTTTAGTGCCCATTTTCGGCCAACCTCTCCATCATCTTTCTTTGGCTGAGTGGCATGTATTTCCAC  
GGTGCTCGTTTTTCTAATTATGAAGCATGGCTAAGCGACCCGACTCACATTGGGCCGAGTGCCAGGTGGTTTTGGCCAGT  
AGTGGGCCAAGAAATATTGAATGGTGTATGGGTGGGGGCTTCCGAGGAATACAAATAACCTCCGGTTTTTTTTAGATTT  
GGCGAGCATCTGGAATAACTAGTGAATTACAACCTCTATTGACTGCAATTGGTGCATTGATCTTTGCAGCATTAAATGCTT  
TTTGCTGGTTGGTTTTCAATTATCATAAAGCTGCTCCAAAATTTGGCTTGGTTTTCAAGATGTAGAATCTATGTTGAATCACC  
TTTAGCGGGGCTACTAGGACTGGGGTCTCTCTTTGGGCGGGACATCAAGTACATGTATCTTTACCGATTAACCAGTTTC  
TAAACGCTGGAGTAGATCCTAAAGAGATACCCTTCCCTCATGAATTTATCTTGAATCGGGATCTTTTGGCTCAACTTTAT  
CCCAGTTTTGCTGAGGGAGCAACCCCTTTTTTACCTTGAATTTGGTCAAAAATATGCGGACTTTCTTACTTTTTCGCGGAGG  
ATTAGATCCAGTAACTGGGGTCTATGGCTGACCGATATTGCACACCATCATTTAGCTATTGCAATTTCTTTTCTGATAG  
CAGGTATATGTATAAAGCAACTGGGGCATTTGGTCAATGGTCAATGAGTCAATTTTGAAGCTCATAAAGGTCCATTTTACA  
GGTCAGGGCCATAAAGCCCTATATGAGATCCTAACAACGTCATGGCATGCTCAATTTATCTTTAACTTAGCTATGTTAGG  
CTCTTTAACCATTGTTGTAGCTCACCATATGTATTTCCATGCCCCCTTATCCGTATCTAGCTACTGACTATGGTACACAAT  
TGTCGTTGTTTACACATCACATGTGGATTGGTGGATTTCTCATAGTTGGCGCTGCTGCGCATGCAGCCATTTTTATGGTA  
AGAGACTATGATCCAACACTACTCGATAACAACGATCTATTAGATCGTGTCTTAGGCATCGCGATGCAATCATATCACATCT  
CAACTGGGCATGTATATTTCTAGGCTTTTACAGTTTTGGTTTTGTATATTCATAATGATACCATGAGCGCTTTAGGGCGTC  
CTCAAGATATGTTTTTTCAGATACCGCTATCCAATTACAACCC---

GTCTTTGCTCAATGGATACAAAACACCCATGCTTTAGCACCTGGTGAACGGCTCCTGGTGCAACAACAAGCACCAGTTT  
AACTTTGGGGGGCGGTGATTTAGTAGCAGTGGGTGGCAAAGTAGCTTTGTTACCTATTCCATTAGGAACTGCAGATTTTT  
TGGTACATCATATTCATGCATTTACGATTCATGTGACGGTATTGATACTTCTGAAGGGTGTCTATTTGCTCGTAGCTCC  
CGTTTTGATACCGGATAAAGCAAATCTTGGTTTTCGTTTTCTTGTGATGGACCTGGAAGAGGGGGAACGTGTCAAGTATC  
GGCTTTGGGATCATGTCTTCTTAGGACTATTCTGGATGTACAATGCAATTTCCGTTAGTTATATTCCATTTAGTTGGAAAA  
TGCAGTCAGATGTTTTGGGGCAGTATAAGTGATCAAGGGGTAGTAACTCATATCACGGGAGGAACTTTGCGCAGAGTTCC  
ATTACTATTAATGGGTGGCTCCGCGATTTCTTATGGGCACAAGCATCCCAGGTAATTCAGTCTTATGGTTCTTTCATTATC  
TGCATATGGACTTTTTCTTCTAGGTGCTCATTTTGTATGGGCTTTTAGTTTAAATGTTTCTATTC---

AGTGGACGTGGTTATTGGCAAGAACTTATTGAATCCATCGTTTGGGCTCATAATAAATTTAAAGTTGCTCCTGCTACTCA  
GCCGAGAGCCTTAAGCATTGTACAAGGACGTGCTGTAGGAGTAACCCATTACCTTCTGGGTGGAATTGCCACAACATGGG  
CGTTCTTCTTAGCAAGAATTATTGCAGTAGGA---

ATGGCATTAAAGATTTCCAAGGTTTAGCCAAGGCTTAGCTCAGGACCCACTACTCGTCGTATTTGGTTTTGGTATTGCTAC  
CGCACATGACTTCGAGAGTCATGATGATATTTACTGAGGAACGCTTTTATCAGAATATTTTTGCTTCTCACTTCGGGCAAT  
TAGCAATAATTTTTCTGTGGACTTCCGGAAATCTGTTTCATGTAGCTTGGCAAGGAAATTTTGGTTCATGGGTACAGGAC  
CCTTTACACGTAAGACCTATTGCTCATGCAATTTGGGATCCTCATTTTGGTCAACCGGCTGTAGAAGCTTTTACTCGAGG  
GGGTGCTCTTGGCCCAGTGAATATCGCTTATTCTGGTGTATCAATGGTGGTATAACAATCGGTTTACGCACTAATGAAG  
ATCTTTTACTGAGCTCTTTTTCTATTATTTCTTTTCTACCATATCCTTAATAGCAGGTTGGTTACACCTACAACCGAAA  
TGGAAACCGAGTGTTCGTGGTTCAAAAATGCCGAATCTCGTCTGAATCATCATTTGTGAGGACTCTTCGGCGTAAGTTC  
CTTGGCTTGGACAGGGCATTTAGTACAT

Pelargonium

CGAACCCCGAGACTAATAAGGATGTTTCAATTTCTTAAAATATCCCATATATGTAGGCGGGAACAGGGGAAGGGGTGAGATT  
TATCCTGACGGGAGCAAGAGTAACAATACAGTTTCTAATGCTACAGCAGCGGGTATAGTAAGCAAAAATCATACGAAAAGA  
G---

AGGGGGGGCTACGAAATAACCATAGCGGATGCATCGAACGGACGTCAAGTGGTTGATATTATCCCTCCAGGACCGGAAC  
TCTTGTTCGGAGGGCGAGTCTCTCAAAGTGGATCAACCATTAACAAGTAATCCTAATGTGGGTGGATTTGGTCAGGGGG  
ATGCAGAAATAGTACTTCAAGATCCATTACGTGTCCAAGGCCTTTTGTCTCTTGACATCTGTTCTTTTGGCACAAATC  
TTTTTGGTTCCT---AAAAAGAAACAGTTTGAGAAAGTTCAATTATCCGAAATG---  
AATTTCTAGATGAGTAAAGTATATGATTGGTTCGAAGAACGTCTCGAGATTCCAGGCGATTGCGGACGATATAACTAGTAA  
GTACGTTCCCCCTCATGTCAACATATTTTATTGTCTGGGAGGAATTACGCTTACTTGTTTTTTAGTACAAGTAGCTACCG  
GATTTGCTATGACGTTTTACTACCGCCCTACTGTTACTGAGGCTTTTGTCTGTTCATAACATAATGACTGAAGCCAAC  
TTTGGGTGGTAAATCCGATCAGTCCATCGATGGTGGCAAGTATGATGGTCTAATGATGATCTTGCACGTATTTTCGTGT  
GTATCTTACCGGTGGTTTTAAAAAACCTCGGGAATTGACTTGGGTTACAGGTGTGGTTTTGGCTGTATTGACTGCATCCT  
TTGGTGTAACTGGTTATTCCTTACCTCGGGACCAAATGGTTATTGGGCAGTCAAATGTAAACAGGCGTACCGGACGCT  
ATTCTGTAAATAGGATCGCCTTTGGTAGAGTTATTGCGCGGAAGTGCCTAGCGTGGGACAATCCACTTTGACGCGTTTTTA  
TAGTTTACACACTTTTGTATTACCCCTTGTAGCGCTGTATTTATGTTAATCCATTTTCTAATGATACGTAAGCAAGGGA  
TTTTCTGGCCCTTTATAAATGGGAGTAACAAAAAACCCGACTTGAATGATCCTGTATTAAGAGCTAAATTTGGCTAAAGGA  
ATGGGCCATAATTATTACGGAGAACCCGCGTGGCCCAATGACCTTTTATATATTTTTCCCGTAGTCATTCTAGGTACTAT  
TGCATGTAACGGAGGCTTAGCGGTTCTAGAACCATCAATGATTGGTGAACCCGCTGACCCATTTGCAACTCCTTTGGAAA  
TCTTACCTGAATGGTATTTCTTTCCCGTATTTCAAATACTTCGTACAGTACCCAATAAGTTATTGGGTGTTCTTTTAAATG  
GTTTCAGTACCTGCGGGATTATTAACAGTACCCTTTTTAGAAAACGTTAATAAATCCAAAATCCCTTTTCGTGGCCAGT  
AGCCACAACCGTCTTTTTGGTTGGTACTTTAGTGGCCCTTTGGTTGGGTATTGGAGCAACATTACCTATTGAGAAATCCC  
TCACTTTAGGTCTTTTTTCAATTAAGTAA-----  
ATGATTGAAGTTTTTCTATTTGGAATCGTTTTGGGTCTAATTCCTATTACTTTGGCTGGATTATTTGTAAGTGCATATTT  
ACAATACAAACGCGGTGATCGGTTGGGCCTTTGA-----  
ATGTTGACTATAACT-----  
AGTTATTTCCGGTTTTCTACTCGTCGCTTTAACTATAACCTCAGCTCTATTTATTGGTCTGAGCAAGATA-----  
CGACTTATTTGA-----  
-----  
ATGGATATAGTAAGTCTCGCGTGGGCTGCTTTAATGGTAGTCTTTACATTTTCCCTTTTCACTGGTAGTATGGGGAAGAAG  
TGGACTTTAGATGATTATTCGTTTCGTCGGAACCA-----GAAGTCAA-----  
ATTTTGGTAGATAGGATCTCTATAAAAAACGTCTTTCGAGGAGTGGGCTAGACCGGGTCATTTCTCAAGAACAATAGCCAA  
GGGGCCTGATACTACACTTGGATCTGGAACCTTACATGCTGATGCTCACGATTTTCGATAGCCATACCAGCGATTTGGAGG  
AGATCTCTCGAAAAGTCTTTAGTGCCCAATTTGCGCCAACCTCTCGATCATCTTTCTTTGGCTGAGTGGCATGTATTTCCAT  
GGTGCTCGTTTTTCCAATTATGAAGCCTGGCTAAGTATCCTACTCACATTGGACCTAGCGCTCAGGTGGTTTTGGCCAAT  
AGTAGGCCAAGAAATATTGAATGGTGTATGTGGGTGGGGTTTTTCGAGGAATACAAATAACCTCTGGGTTTTTTCAGATTT  
GGCGAGCATCTGGAATAACTAGTGAATTACAACCTCTATTGTACCGCAATTGGTGCATTGGTCTTTGCAGCCTTAATGCTT  
TTTGCTGGTTGGTTCATTATCACAAAGCTGCTCCCAAATTTGGCTTGGTTCCAAGATGTAGAATCTATGTTGAATCACCA  
TTTAGCAGGGCTACTAGGTCTTGGGTCTCTTTCTTGGGCGGGGCATCAAGTCCATGTCTCTTTACCAATTAACCAATTTT  
TAAACGCTGGAGTAGATCTAAAGAAATCCCCTTCTCATGAATTTATCTTGAATCGGGATCTTTTGGCTCAACTTTAT  
CCTAGTTTTTCCGAGGGAGCAACCCCTCTTTACCTTGAATTTGGTCAAATATGCGGAATTTCTGACTTTTTCGTGGAGG  
ATTAGATCCAGTAACAGGCGGTCTCTGGCTGACCGATATTGCACACCATCATTTAGCTATTGCAATTTCTTTTCTGATAG  
CAGGTACATGTATAGGACCAACTGGGGCATTGGCCATGATCTAAAAGAGATTTTAGAAGCCCATAAAGGACCCTTTACA  
GGCCAGGGCCATAAAGGTCTATATGAGATTCTAACAACGTATGGCATGCTCAATTATCCCTTAACTTAGCTATGTTAGG  
CTCTTTAACCATTGTTGTAGCTCACCATATGTATTCATGCCCTTATCCATATCTAGCTACTGATTATGGTACACAAC  
TGTCGTTGTTACACACCACATGTGGATTGGCGCATTTCTCATAGTTGGCGCTGCTGCGCATGCAGCCATTTTTATGGTA  
CGAGACTATGATCCAACCTACTCGATAACAACGATCTATTAGACCGTGTCTTAGGCATCGCGATGCAATCATATCACACCT  
CAACTGGGTATGTATCTTTTAGGCTTTACAGTTTTGGTTTTGTATATTCATAATGATACCATGAGCGCTTTGGGGCGTC  
CCCAAGATATGTTTTAGATACTGCTATCCAATTACAACCT---  
GTCTTTGCTCAATGGATACAAAACACCCACGCTTTAGCACCTGGTTCAACAGCCCCCGGTGCAACAACAGGTACCAGTTT  
GACTTGGGGAGGGTTGATTTAGTGGCAGTGGGTGGCAAGGTTGCTTTGTTACCTATTCCATTAGGAACCGCAGATTTTTT  
TGGTACATCATATTCATGCATTTACGATTCATGTGACCCTATTGATACTTCTCAAAGGCGTTCTATTTGCTCGTAGTTCT  
CGTTTTGATACCGGATAAAGCAAATCTTGGATTCCGTTTTCCCTTGTGATGGGCTGGAAGAGGGGGGACATGCCAAGTATC  
CGCTTGGGATCATGTCTTCTTAGGTCTTTTTTGGATGTACAATGCTATTTCCGGTAGTAATCTTCCATTTTCAGTTGGAAAA  
TGCAGTCAGATGTTTGGGGTAGTATAAGTGAAGCAAGGGGTGGTAACTCATATTACGGGAGGGAACCTTTGCGCAGAGTTCC  
ATTACTATTAATGGGTGGCTCCGTGATTTCTTATGGGCACAGGCATCCCAGGTCATTGAGTCTTATGGTTCTTCAATTATC  
TGCATATGGCCTTTTTTCTAGGTGCTCATTTTGTATGGGCTTTTAGTTTTAATGTTTCTATTC---  
AGCGGGCGTGGTTATTGGCAAGAAGTATTGAATCCATTGTTTGGGCTCATAATAAATTAAGGTTGCTCCTGCTACTCA  
GCCTAGAGCCTTGAGCATTGTACAAGGACGTGCTGTAGGAGTAACCCATTACCTTCTGGGTGGAATTGCCACAACATGGG  
CGTTCTTCTTAGCAAGAATTATTGCAGTAGGATAAATGGCATTAAAGATTTCCAAGGTTTAGCCAAGGCTTAGCCCAGGAC  
CCCACCCTCGTCGATTTTGGTTGGTATTGCTACCGCGCATGACTTCGAGAGTCATGATGATATTACTGAAGAACGCTT



TTATCAGAATATTTTTGCTTCTCACTTCGGGCAATTAGCAATAATCTTTCTGTGGACTTCGGGAAATCTCTTTTCATGTAG  
CTTGGCAAGGAAATTTTTGAGGCATGGGTACAGGACCCTTTACACGTAAGACCTATTGCTCATGCAATTTGGGATCCTCAT  
TTTGGTCAACCAGCTGTAGAAGCTTTTACTCGGGGGGGTCTCTTGGCCAGTGAATATCGCCTATTCTGGCGTTTATCA  
GTGGTGGTATACAATTGGTTTACGTACTAATGAGGATCTTTATACTGGAGCTCTTTTTCTATTATTTCTATCTGCCATAT  
CCTTAATCGCAGGTTGGTTACACTTACAACCGAAATGGAAACCCAGCGTTTTCTGGTTCAAATAATGCCGAATCTCGTCTC  
AATCATCATTTGTAGGGCTCTTCGGAGTAAGCTCTTTGGCTTGGACAGGACATTTAGTCCAT

Phalaenopsis

CCGACCCTGCTACGAAAAAGACGTTTCAATTTCTTAAAATATCCCATATATGTAGGTGGGAACAGAGGAAGGGGTGAGATT  
TATCCTGATGGTAACAAGAGTAACAATACAGTTTATAATGCTACATCTGCTGGTATAGTAAGCAGAATAGCACGTAAGA  
A---

AAAGGGGATATGAAATAACCATAGTTGATGCATCAGAAGGACGTCAAGTGGTTGATATTATACCTCCAGGACCAGA  
ACTTCTTGTTCAGAAGGTGAATCCATCAAGCTTGTCAACCATTAACAAGTAATCCAATGTAGGAGGTTTTGGTCAGGGAG  
ACACAGAAATAGTGCTTCAAGATCCATTACGAGTCCAAGGCCTTCTGTTCTTCTTGGCATCTGTAATTTTGGCACA  
AATCTTTTTGGTTCTG---AAAAAGAAACAGTTTGAAGAGTTTCAAGTGTACGAAATG---AATTTT---

ATGAGCAAAGTATATGATTGGTTCGAGGAACGTCTCGAGATTCAAGCGATTGCAGATGATATAACTAGTAAATATGTTCC  
TCCTCATGTCAACATATTTTATTGTCTAGGGGGGATTACGCTTACCTGTTTTTTAGTACAAGTAGCTACGGGTTTTGCTA  
TGACCTTTTACTATCGTCCAACCTGTTACAGAGGCTTTTTCTTCTGTTCAATACATAATGACTGAGGCCAACCTTTGGTTGG  
TTAATTCGATCAGTTCATCGATGGTCAGCAAGTATGATGGTTTTAATGATGATCTTGCACGATTTTCGTGTGTATCTTAC  
GGGTGGTTTTAAAAAACCTCGCGAATTAACCTTGGGTTACCGGGTGGTTCTGGCTGTATTGACCGCATCTTTTGGCGTAA  
CTGGTTATTCTTGCCTTGGGACCAAATTGGCTATTGGGCAGTAAAAATTGTAACAGGTGTGCCTGAAGCTATTCTTATA  
ATAGGATCACCTTTGGTAGAATTATTACGTGGAAGTGTAGTGTGGGCCAGTCCACTTTGACTCGTTTTTATAGTTTTACA  
TACTTTTTGTATTACCTCTTCTTACTGCCGATTTATGTTAATGCACCTTTCCAATGATACGTAAGCAAGGTATTTGGGTC  
CTTTA---

ATGGGAGTAACAAAGAAACCTGATTTGAATGATCCTGTATTAAGAGCTAAATTAGCTAAAGGGATGGGACATAATTATTA  
TGGAGAACCTGCATGGCCCAATGATCTTTTATATATTTTTCCAGTAGTAATTTTAGGCATATTGCATGTAATGTGGGCT  
TAGCAGTTCTAGAGCCGTCAATGATCGGTGAACCGGCGGATCCGTTTGAACCTCCGTTGGAAATATTACCCGAATGGTAC  
TTCTTTCCCGTATTTCAAATACTTCGCACAGTACCCAATAAGTTATTGGGTGTTCTTTAATGGTTTCAGTACCCTAGG  
ATTATTGACAGTACCTTTTTTGGAGAATGTCAATAAAATCCAAAATCCATTTTCGTCCAGTACCACACAGTCTTTT  
TGATCGGTACCGCAGTAGCTCTTTGGTTAGGGATTGGAGCAACTTTTACCTATTGAGAAATCCTTAACTTTAGGTCTTTTT  
CAAATTGAT-----

ATGATTGAAGTTTTTCTATTTCGGAATCGTCTTAGGTCTAATTCCTATTACTTTAACAGGATTATTTGTAAGTGCATATTT  
ACAATACAGGCGCGGTGATCAGTTGGACCTT-----

ATGCCTATTCTAACT-----

AGTTATTTTTGGTTTTTTTACTGGCTGCTTCAACTATAACCCAGCTCTATTTATTGGTTTTAAACAAGATA-----

CGACTT-----

ATGGATATAGTAAGTTTTCGCTTGGGCTGCTTTAATGGTAGTGTTTACATTTTCTCTTTCACTTGTAGTATGGGGAAGGAG  
TGGGCTT---ATGATTATTCGTTTCGCCGGAACCC-----GAAGTGAAA-----

ATTGTTGTAGACAGGAATCCTATAAAAACGTCTTTTCGAGGAATGGGCCAGACCCGGCCATTTCTCAAGAACAATAGCTAA  
GGGTCTGATACTACCCTTGGATCTGGAACCTACATGCTGATGCTCACGATTTTCGATAGTCATACCAGCGATTTGGAGG  
AGATCTCTCGAAAAGTATTTAGTGCTCATTTCGGCCAACCTCTCTATTATCTTTCTTTGGCTGAGTGGCATGTACTTCCAT  
GGCGCCCGTTTTTCCAATTATGAAGCATGGCTAAGTATCCTACTCATATTGCACCCAGTGTCAAGTAGTTTGGCCAAT  
AGTAGGTCAAGAAATATTGAATGGAGATGTGGGTGGTGGTTCCGAGGAATACAAATAACCTCCGGTTTTTTTTAGATTT  
GGCGAGCATCTGGAATCACTAGTGAATTACAACCTCTACTGTACCGCAATTGGTGCATTGGTCTTTGCATCGTTAATGCTT  
TTTGCTGGTTGGTTCCATTATCACAAAGCCGCTCCCAAATTGGCTTGGTTCCAAGATGTAGAATCTATGTTGAATCACCA  
CTTAGCGGGATTACTAGGCTTGGGTCTCTTTCTTGGGCGGGACACCAAATCCATGTATCTTTACCGATTAAACCAATTTT  
TTGACGCTGGAGTTGATCCTAAAGAAAATACCCTTCCCATGAATTTTATCTTGAATCGGGATCTTTTGGCTCAACTTTAT  
CCAAGTTTTGCGGAGGGAGCAACACCCTTTTTTACCTTGAATTGGGCAAAATATGCGGAATTTCTGAGTTTTCTGGGAGG  
ATTAGATCCAATAACAGGGGGTCTTTGGTTGAGTATGATTTGCACACCATCATTAGCTATTGCGATTCTGTTTCTGATCG  
CAGGTCATATGTATAGGACTAACTGGGCCATTGGTCATGGCCTGAAAGACATTTTAGAGGCTCATAAGGGTCCATTTACG  
GGCCAGGGCCATAAAGGTCTCTATGAAATCCTAACAACGTCATGGCATGCTCAATTATCTCTGAACCTGGCTATGTTAGG  
TTCTTTAACCATTGTTGTAGCTCACCATATGTATTCCATGCCCCCTATCCATACCTAGCTATTGACTATGGTACACAAC  
TTTCGTTGTTTACACATCACATGTGGATCGGGGGATTTCTTATAGTTGGCGCTGCTGCACATGCAGCCATCTTTATGGTA  
AGAGATTACGATCCAACCTACTCGATAACAACGATCTATTAGATCGTGTCTTAGACATCGTGATGCAATCATATCACATCT  
CAACTGGGCATGCATATTTCTAGGGTTTACAGTTTTGGCTTGTATATTATAATGATACTATGAGCGCTTTAGGACGTC  
CCCAAGATATGTTTTTCAATACTGCTATAACAATTACAACCC---

ATCTTTGCTCAATGGGTACAAAACACCCATGCTTTAGCACCTAACGTAACAGCTCCTGGTGAACAACAAGTACCAGCTT

AATTTGGGGAGGTGGTGTAGTTAGTAGCAGTGGGCGGCAAGGTTGCTTTGTTACCTATAACCATTAGGAACTGCAGATTTTT  
TGGTTCATCACATTCATGCATTTACAATTCATGTGACTGTATTGATCCTACTGAAAGGTGTTCTATTTGCTCGCAGTTCC  
CGTTTTGATACCTGATAAAGCAAATCTTGGTTTTCGTTTTCTTGTGATGGACCTGGTAGGGGGGTACATGTCAAGTATC  
CGCCTGGGATCATGTATTCTTAGGCCTATTCTGGATGTACAATGCAATTTCCGGTAGTAATTTCCATTTTCAGTTGGAAAA  
TGCAGTCGGATGTTTTGGGGTACTATAAGTGATCAAGGAGTAGTCACTCATATCACAGGAGGTAACCTTTGCACAGAGTTCC  
ATTACTATTAATGGATGGCTCCGGGATTTCTTATGGGCACAGGCATCTCAGGTAATTCAGTCTTATGGTTCTTCATTATC  
TGCATATGGTCTTTTTTTCTTAGGTGCTCATTTTGTCTGGGCTTTTCAGTTAATGTTTCTATTC---  
AGTGGCCGTGGTTATTGGCAAGAACTCATTGAATCCATCGTTTTGGGCTCATAACAAATTTAAAGTTGCTCCTGCTACCCA  
GCCTAGAGCCTTGAGTATTGTACAAGGGCGTGTGTAGGAGTAACCCATTACCTTCTGGGTGGAATTGCCACAACATGGG  
CATTCTTCTTAGCAAGAATTATTGCAGTAGGA---  
ATGACATTAAGATTTCCCAAGGTTTAGCCAAGGCTTAGCTCAGGACCCCACTACTCGTCGTATTTGGTTTTGGTATTGCTAC  
CGCACATGACTTCGAGAGTCATGATGATATTACTGAAGAACGTCTTTATCAGAACATTTTTGCTTCGCACCTTTGGACAGT  
TAGCAATAATATTTCTGTGGACATCCGGAAATCTGTTTCATGTAGCTTGGCAAGGAAATTTGAGTCATGGATACAGGAC  
CCTTTACATGTACGACCTATTGCTCATGCAATTTGGGATCCTCATTTTGGTCAACCTGCTGTAGAAGCCTTTACTAGAGG  
AGGCGCTATCGGTCCAGTGAATATTGCTTATTCTGGTGTATTATCAGTGGTGGTATAACAATTGGATTACGCACATAATGGGG  
ATCTTTATACTGGAGCTCTTTTTCTATTACTTCTTTCTGCTATATCCTTAATAGCGAGTTGGTTACACCTACAACCAAAA  
TGAAACCAAGCGTTTTCTGGTTCAAAAATGCCGAATCTCGTCTCAATCATCATTTGTCAGGGCTTTTTGGAGTAAGTTC  
CTTGGCTTGGACAGGACATTTAGTTTCAT

Pinus

CAGATCCTTCTACTGATAAAGAAGCTCACTTCTGAAATATCCCATATATGTGGGTGGTAATAGAGGAAGAGGACAAATT  
TATCCCGACGGGAGTAAGAGCAACAATACGGTCTATAGTGCTTCAGCAACAGGAAGAGTGAGCAAAATTTTACGTAAGA  
A---

AAGGGTGGATATGAGATAACTATCGATAATACATCAGATGGTGGGCAAGTGGTTGACATTGTACCTCCAGGACCGGAGCT  
TCTTATTTTCCAGAAGGCGAATTGATCAAGGTCGATCAGCCATTAACGAATAACCCATAATTTGGGTGGATTTGGTCAAGGAG  
ATGCAGAGATAGTACTTCAAGATCCATTACGTGTTAAAGGTCTTTTATTATTCTTAGCATCTGTCATTCTGGCACAGATA  
TTTTTGGTCCTT---AAGAAGAAACAATTTGAGAAAGTTCAATTGGCCGAGATG---AATCTT---

ATGGGTAAAGTATACGATCGGTTTCGAAGAGCGTCTCGAGATTCAGGCGATTGCGGATGATATCACCAGTAAATATGTTCC  
TCCTCATGTCAATATATTTTATTGTCTAGGGGGGATCACACTTACTTGTTTTTTAGTACAAGTAGCTACTGGTTTTGCTA  
TGACTTTTTACTATCGTCCGACCGTTTTACAGAAGCTTTTGCCTCTGTTCAATACCTAATGACCGAAGTTAACTTTGGTTGG  
TTAATCCGATCAATTCATCGATGGTTCGCAAGTATGATGGTTCTAATGATGATCCTGCACGTATTCCGTGTTTTATCTCAC  
AGGTGGATTCAAAAAACCCCGTGAATTAACCTTGGGTACAGGTGTAATTTTGGCTGTGTTGACCGTATCCTTCGGTGTAA  
CTGGTTATTCTTTGCCCTGGGATCAAATTGGTTATTGGGCAGTGAAAATTGTGACTGGTGTGCCTGAGGCTATTCTCTGTA  
ATAGGATCTCCTCTGGTAGAATTATTACGCGGAAGTGTAGTGTGGGTCAATCTACCTTGACTCGTTTTTATAGTTTACA  
CACTTTCATATTACCCTTCTTACTGCTGTATTTATGCCAATGCACCTTCTAATGATCCGTAAGCAGGGTATTCCAGGTC  
CTTTA---

ATGGGAGTAACAAAGAAACCTGACCTAAATGATCCTGTATTAAGGGCTAAATTAGCTAAAGGTATGGGACATAATTATTA  
TGGAGAGCCCGCTTGGCCCAATGATCTTTTCATATATTTTTCCAGTAGTAATTTTAGGTACTATTGCATGTACAATAGGTT  
TAGCGGTTCTAGAACCATCAATGATTGGTGAACCAGCAAATCCATTTGCAACTCCTTTGGAGATATTGCCCGAATGGTAT  
TTTTTCCCTGTATTCCAAATACTTCGTACAGTACCTAACAAATTATTAGGTGTCCTTTTAAATGGGCTCAGTACCCGCGGG  
ATCATTGACGGTGCCTTTTTCTAGAGAATGTGAATCAATTTTCCAGAAATCCATTTTCGTCGTCCAGTAGCTACAACAGTATCCT  
TGATCGGTACTGCAGTAGCCCTTTGGTTAGGTATTGGGGCAGCGTTGCCTATTGATGAATCTTTAACTTTAGGTCTTTTT

ATGATTGAGGCTTTGCCATCCGGAATTGTGTTAGGTCTAATTCCTATAACTTTGGCCGGATTATTCGTAAGTGCATATTC  
ACAATACCGACGTGGTGTCAATTGGATATT-----

ATGAAGATATGTATAAACCATATTTTCAATTCAGTCCTTCCACGCCTACTATAACTATAATTAGTTATTTCCGGTTTCTTATT  
GGCTTCTATCATTTTACCCTAGTCCTATTTCATTAGTTTCGAGCAAGATA-----  
CAACTTATTTCAAAATGAAGGAAGGGGAAACCCCTCTCAGTTCACTATTTCAATTTCAATAA-----

ATGGATATAGTCGGTATAACTTGGGCTGCTTTAATGGTAGTTTTTACATTTTCCCTTTCACTCGTAGTATGGGGGAGAAG  
TGGGCTA---ATGACCATTTCGTTCCCGGAACCA-----

GAAGTAAAGAAAGTAAAGGTGCTAGTGGATAGAGATACTGTAAAAACATCTTTTGAATAATGGGCCAAACCTGGTCATTT  
CTCAAGGACGCTAGCTAAAGGTCCTGATACTACCCTTGGATCTGGAACCTTACATGCTGATGCTCACGATTTTGATAGCC  
ATACTAATAATTTGGAAGATATTTCTCGCAAAATATTTAGCGCTCATTTTGGTCAACTAGCCATCATCTTTATTTGGCTA  
AGTGGGATGTACTATCACGGCGCTCGTTTTCTCCAATTATGAAGCATGGCTGGCTGATCCCACTCACATCAAACCCAGTGC  
CCAAATAGTTTTGGCCAATAGTAGGCCAAGAAATATTGAATGGGGATGTAGGTGGAGGTTTTTCGAGGGATACAATAACCT  
CTGGGTTCTTCCAGATTTGGCGAGCATCTGGAATAACCAGTGAATTACAACCTTTACTGCACTGCAATTTGGTGCATTGATC  
TTTGCAGCGTTAATGCTTTTTGCTGGTTGGTTCCATTATCACAAGCTGCCCAAAATTTGGCTTGGTTCCAGGAAGTAGA

ATCCATGTTGAACCATCATTTAGCAGGGTTACTAGGACTTGGATCTCTATCTTGGGCAGGACACCAAATACATGTCTCTC  
TACCCATTAACCAACTTCTAGACGCTGGAGTGGATCCTAAAGAGATACCACTTCTCATGAATTTATTTTCAATCGCGAT  
CTTTTGGCTCAACTTTATCCCAGTTTTGCTAAGGGAGTGACCCATTTTTAACCCTGAATTGGTCGGAATATTCAGACTT  
TTTGACTTTTTCGTGGAGGATTAATCCAGTAACGGGGGGTCTGTGGTTGACCGATACTGCGCATCATCATTTGGCTATTG  
CAGTTCTTTTCTGATAGCCGGTCATATGTATAAGACCAATTGGCGCATTGGCCATAATCTCAAGGACCTTTTAGAAGCT  
CATAAAGGTCCATTTACGGGGGAGGGCCATAAAGGTCTTTACGAGATCTTAACTACCTCGTGGCATGCTCAGCTAGCTGT  
TAACCTAGCTATGTTAGGATCTTTAACTATTGTTGTAGCTCACCACATGTATTGATGCCTCCCTACCCATACCTAGCTA  
CTGATTATGGTACCCAACCTCTCTCTGTTTACACATCATATGTGGATTGGTGGGTTTATCATAGTTGGCGCTGCTGCACAT  
GCAGCGATTTTTATGGTAAGAGACTATGACCCGACTACTCAATACAACAATTTATTAGATCGCGTTCTTAGACATCGTGA  
TGCAATTGTATCACACCTCAACTGGGTATGTATATTCTTAGGTTCCATAGTTTTGGTCTGTATATTCATAATGATACTA  
TGAGCGCTCTAGGACGTCTCAAGATATGTTCTCAGATACTGCTATAACAATTACAACCT---

ATCTTTGCGCAATGGATACAAAACACTCATGCTTCAAGCAGCTGGTTCAACAGCTCCTGGTGCAACAGCGAGTACCAGCTT  
AACCTGGGGAGGTGGTGATTTGGTGACAGTAGGTTCCAAAGTGGCTTTGTTACCAATTCCATTAGGAACCGCGGATTTTT  
TGGTACATCACATTCATGCATTTACTATCCATGTGACTGTTTTAATCCTACTTAAAGGTGTTCTATTTGCCCGTAGCTCC  
CGTTTTAATACCTGATAAAGCGAATCTGGGTTTTCGCTTTCTTGTGATGGACCTGGTAGAGGAGGAACATGTCAAGTATC  
TGCCTGGGATCATGTCTTCTTGGTTTTATTCTGGATGTACAATGCAATTTCCGGTAGTAATATTCCATTTTCCAGCTGGAAA  
TGCAGTCCGATGTTTTGGGGTAATATAAGTGATCAGGGAGTGGTAACTCATATTACGGGAGGAACTTTGCACAAAGTTCC  
ATTACGATTAACGGGTGGCTCCGTGACTTTCTATGGGCACAAGCCTCTCAAGTGATCCAATCTTATGGTTCTTCATTATC  
TGCATATGGTCTTTTTATTTTTAGGTGCTCATTTTTGTTTGGGCCCTTCAGTTTTAATGTTCTTATTCC---

AGCGGCCGTGGGTATTGGCAAGAACTCATTGAATCTATTGTTTGGGCCATAACAAATTGAAGTTGCTCCTGCTATCCA  
GCCAGAGCCTTGAGCATTGTACAGGGACGTGCTGTAGGAGTAGCTCATTACCTTCTGGGTGGAATCGTCACAACATGGG  
CGTTCTTCTGGCAAGAATTATTGCAATAGGA---

ATGGCATCAAGATTTCCAAAGTTCAGCCAAGGCTTGGCTCAGGACCCAACACTACTCGTCGTATTTGGTTCGGTATTGCGAC  
CGCACATCACTTTGAGAGTCATGATGATATTACCGAAGAACGCCTTTATCATAAAATTTTTGCTTCCCCTTTGGTTCAGT  
TGGCAATAATCTTTCTGTGGACCTCTGGTAATTTGTTCCATGTGGCTTGGCAAGGCAATTTTGAAGCATGGGTACGCGAT  
CCCTTACATGTAAGACCCATTGCTCATGCAATTTGGGATCCTCATTTTTGGTCAACCAGCTATAGAAGCCTTTACCCGAGG  
AGGTGCTCCCGGTCCGGTCAATATTGCTTATTCCGGTGTATTATCAGTGGTGGTATACCATTGGCTTACGCACTAACGAAG  
ATCTTTATGCTGGAGCTCTTTTCTTGTATTTCTTTCTGTATCTTTTTAATAGCGGGTAGGTTACATCTACAACCTAAA  
TGGAGACCAAGTGTTCATGGTTCAAAAATGCCGAATCCCGTCTCAATCATCATTTGTGAGGACTCTTCGGAGTCAGTTC  
TCTAGCTTGGACAGGGCATTAGTTCAT

Piper

CGGACCCCGCCGCTAAGAAGGACGCTCACTTCTTAAAATATCCTATATATGTAGGGGGCAACAGGGGTAGGGGTGAGATT  
TATCCAGATGGAAGCAAGAGTAATAATACAGTCTATAATGCTACAGCTGCAGGTACAATAACTAAAATTTTACGTAAAGA  
A---

AAAGGAGGATATGAAATATCCATCGCTGATGCATCGGACGGCCGCAAGTGGTTGACAATATACCTCCAGGGCCAGA  
TCTTGTTCAGAGGGTGAATCTATCAAACCTTGTATCAACCATTAACAAGTAATCCTAATGTAGGTGGATTTGGTTCAGGGAG  
ATGCAGAAATAGTACTTCAAGATCCATTACGGGTCCAAGTTTTGTTGTTCTTTTTGGCATCTGTTACTCTGGCACA  
TTTTTGGTTCTA---AAAAAGAAACAATTTGAGAAGGTTCAATTTGTCGAAATG---AATTTCT-----

AAAGTATATGATTGGTTCGAAGAGCGTCTCGAGATTCAAGCGATCGCAGATGATATAACCAGTAAATATGTTCCCCCTCA  
TGTC AACATATTTTATTGCTAGGAGGGATCACACTTACTTGTTTTTTAGTACAAGTTGCTACGGGTTTTGCTATGACTT  
TTTACTACCGTCCGACCGTTACCGAGGCTTTTGCCTCGGTTCAATACATAATGACTGAAGCTAATTTGGTTGGTTAATC  
CGATCAGTTCATCGATGGTTCGGCAAGTATGATGGTCTAATGATGATTTTGCACGTATTTTCGTGTTTATCTCACAGGTGG  
ATTTAAAAAACCTCGCGAATTAACCTTGGGTTACCGGTGTAATCTAGCTGTATTGACTGCATCCTTTGGCGTAACCGGTT  
ATTCTTACCTTGGGATCAGATTGGTTATTGGGCAGTCAAAATTTGTGACAGGCGTACCAGAAGCAATTCCTGTAATTGGA  
TCCCCTTTAGTAGAATTACTGCGTGGAAGTACTAGTGTGGTCAATCCACCCTGACCCGCTTTTATAGTTTACACACTTT  
TGTATTACCTCTTCTTACTGCCGATTTATGTTAATGCACTTTTCAATGATACGTAAGCAAGGCATTTTCCAGTCTTTA-

-----  
AACAAAGAAACCTGATTTGAACGATCCTGTATTAAGAGCGAAATTAGCTAAAGGGATGGGGCATAATTATTATGGCGAAC  
CCGCATGGCCAAACGACCTTTTGTATATTTTTCCAGTAGTAATTTAGGTAATTTGATGTAACGTGGGCTTAGCAGTT  
CTAGAACCGTCAATGATTGGTGAACCAGCAGATCCATTTGCAACTCCTTTGGAAATATTACCGGAATGGTACTTCTTTCC  
CGTATTTCAAATTTCTCCGTACAGTACCCAATAAGTTATTGGGTGTTCTTTTAAATGGTTTTCAGTACCTGCAGGATTGTTGA  
CAGTGCCTTTTTGGAGAATGTTAATAAATTTCCAAAATCCATTTCCGGCGTCCAGTGGCTACAACAGTCTTTTTGGTCCGT  
ACTGTAGTAGCTCTTTGGTTAGGTATTGGAGCAACATTACCTATTGATAAATCTCTAACTTTAGGTCTT-----

-----  
ATGATTGAAGTTTTTCTATTTGGAATTGTATTAGGTTAATTCCTATTACTTTGGCCGGATTATTTGTAACCTGCATATTT  
ACAATATAGACGCGGCGATCAGTTAGACCTT-----  
ATGCCTACCATAACT-----

AGTTATTTTGGTTTTCTACTGGCTGCTTTAACTATAACCTCGGCTCTATTGATTGGTCTGAGCAAGATA-----  
CGACTTATT-----

ATGGATATAGTAAGTCTCGCTTGGGCTGCTTTAATGGTAGTCTTTACTTTTTCCCTTTTCGCTTGTAGTATGGGGAAGAAG  
TGGACTC---ATGATTATTCGTTTCGCCGGAATCA-----GAAGTGAAG-----  
ATTGTGGTGGATAGGGATCCCGTAAAACTTCTTTTCGAGGAATGGGCCAAACCCGGCCATTTTTCAAGAACAATAGCTAA  
GGGCCCCGATACTACCCTTGGATCTGGAACCTACATGCGGATGCTCACGATTTTGATAGCCATACCAGTGATTTGGAGG  
AGATCTCTCGAAAAGTATTTAGTGCTCATTTCGGTCAACTCTCCATCATCTTCCTTTGGCTGAGTGGAATGTATTTCCAT  
GGTGCTCGTTTTTCCAATTATGAAGCGTGGCTGAGCGATCCTACTCACATTGGGCCAGCGCGCAGGTAGTTTGGCCGAT  
AGTGGGTC AAGAGATATTAATGGTGTATGTGGGCGGAGGTTTTTCGAGGAATACAAATAACCTCCGGGTTTTTCAACTTT  
GGCGCGCATCTGGAATAACTAATGAATTACAACCTTACTGTACCAGCAATTGGTGCATTGGTCTTTGAGGATTAATGCTT  
TTTGCCGGTTGGTTCCATTATCACAAAGCTGCTCCAAAATTGTCTTGGTTCCAAGATGTAGAATCCATGTTGAATCACCA  
CTTGGCGGGTTACTAGGACTGGGGTCTCTTTCTTGGGCGGGACACCAAGTACATGTATCTTTACCGATTAACCAATTTTC  
TAGATGCTGGAGTAGATCCTAAAGAGATACCCTTCTCATGAATTTATCTTGAATCGGGACCTTTTGGCTCAACTTTAT  
CCCAGTTTTGCGGAGGGAGCAACCCACTTTTACCTTGAATTGGTCAAAATACGCGGAATTTCTTACTTTTCGTGGAGG  
ATTAGATCCAACAACAGGAGGCCTATGGCTAACCGATATTGTACACCACCATTTAGCTATTGCAATTTCTTTTCTGATAG  
CAGGTCACATGTATAGGACTAACTGGGGCATTGGTCACAGTCTAAAAGATATTTTAGAGGCTCATAAAGGTCCATTTACG  
GGTCAGGGTCATAAAGGCCTCTATGAGATTCTAACAACATCATGGCATGCTCAATTATCCCTTAACCTAGCTATGTTAGG  
CTCCTTGACCATTGTTGTAGCTCACCATATGTATTCCATGCCCCCTATCCATACCTAGCTACTGACTACGGTACACAAC  
TTTTCGTTGTTACACATCACATGTGGATTGGTGGATTTCTCATAGTTGGTGCTGCCGCACATGCAGCCATTTTTATGGTA  
AGAGACTACGATCCAACCTACTCGATATAATGATCTATTGGATCGTGTCTTAGGCACCGTGATGCAATCATATCCCATCT  
TAACTGGGCATGTATATTTCTAGGCTTTACAGTTTTGGCTTGTATATTCATAATGATACTATGAGTGCTTTAGGACGTC  
CCCAAGATATGTTTTAGATACCGCTATAACAATTACAACCT---

ATCTTTGCTCAATGGATACAAAATACCCATGCTTTAGCGCCGAGTGCAACAGCTCCTGGTGCAATAGCAAGCACCAGCTT  
GACGTGGGGAGGTGCTGATTTAGTGGCAGTAGGTGGCAAGGTGCGCTTTGTTACCTATTCCATTAGGAACTGCAGATTTTT  
TGGTCCATCACATTCATGCATTTACGATCCACGTGACTGTATTGATATTACTGAAAGGCGTTCTATTTGCTCGTAGCTCG  
CGGTTGATACCCGATAAAGCAAATCTAGGTTTTCGTTTTCCCTTGTGACGGACCCGGAAGAGGGCGGGACATGCCAAGTATC  
CGCCTGGGATCATGTTTTCTTAGGCCTATTTCTGGATGTACAATGCGATTTCCGTTAGTGCATATTTCCATTTTCAGTTGGAAAA  
TGCAGTCAGATGTTTGGGGTAGCATAAGTGCATCAAGGGGTGGTAACTCACATCACGGGAGGAAACTTTGCACAGAGTTCC  
ATTACTATTAATGGGTGGCTCCGGGACTTCTTATGGGCACAGGCATCCCAGGTAATTCATCTTATGGTTCTTCATTATC  
TGCATATGGTCTTTTTTCTTAGGTGCTCATTGTTGCTGGGCCTTTAGTTTTAATGTTTCTATTCT---

AGCGGACGGGGTTATTGGCAAGAACTCATTGAATCCATCGTCTGGGCTCATAACAAATTAAGGTTGCTCCTGCTACTCA  
GCCTAGAGCCTTGAGTATTGTACAAGGACGTGCTGTAGGAGTAACCCATTACCTTCTGGGTGGAATTGCCACAACATGGG  
CATTCTTCTTAGCAAGAATTATTGCAGTAGGA---

ATGGCATTACGATTTCCAAGGTTTAGCCAAGGCTTAGCTCAGGACCCACTACTCGTCTGATTTGGTTTTGGTATTGCTAC  
CGCACACGATTTTCGAAAGTCATGATGATATTACTGAGGAGCGTCTTTATCAGAACATTTTTGCTTCCCCTTTGGGCAGT  
TAGCAATAATCTTTCTGTGGACTTCCGAAATCTGTTTCATGTAGCTTGGCAAGGAAATTTGAGTCATGGGTAAAGGAC  
CCTTTACATGTAAGACCTATTGCTCATGCAATTTGGGATCCTCATTGTTGGTCAACCGGCTGTTGAAGCCTTTACTCGAGG  
AGGTGCTTTTCGGCCCCGTGAATATCTCTTATTCCGGTGTGTTATCAGTGGTGGTATACAATCGGCTTACGCACCAATGAGG  
ATCTTTTACTGGAGCTTTTTTCTATTATTTCTTTCTGCTATATCCTTAGTAGCGGGTTGGTTACACCTACAACCAAAA  
TGGAAACCGAGCGTTTCGTGGTTCAAAAATGCGGAATCTCGTCTCAATCATCATTTGTCAGGACTTTTTGGAGTAAGTTC  
TTTGGCTTGGACAGGGCATTTAGTGAT

Platanus  
CGGACCCCGCTACTAAGAAAGATGTTCACTTCTTAAAATATCCCATATACGTAGGCGGGAACAGAGGAAGGGGTCAAATT  
TATCCCGATGGGAGCAAGAGTAATAATACAGTCTATAATGCTACAGCAGCGGGTATAATAAGCAAAATCGTACGTAAAGA  
A---

AAGGGGGGATATGAAATATCCATAGCGGATGCATCGGATGGACACCAAGTAGTTGATATTATACCTCCAGGACCAGA  
ACTTCTGTTTTAGAGGGTGAATCCATCAAGCTTGTATCAACCATTAACGAGTAATCCCAATGTGGGGGGGTTTTGGT  
CAGGGAGATGCAGAAATAGTACTTCAAGATCCATTACGTGTCCAAGGCCTTTTGTTTTTCTTGGCATCTGTTATTTT  
GGCACAAATA TTCTTGGTTCTT---AAAAAGAAACAGTTTGGAGAAGGTTCAATTGTCCGAAATG---AATTTCT---  
ATGAGTAAAGTATATGATTGGTTTCGAAGAACGTCTCGAAATTCAGGCGATTGCAGATGATATAACTAGTAAATATGTTCC  
TCCCCATGTCAACATATTTTATTGTCTAGGGGGGATTACGCTTACTTGTTTTTTTAGTACAAGTAGCTACTGGGTTT  
GCTATGACTTTTTTATTATCGTCCGACCGTTACCGAGGCTTTTGCCTCTGTTCAATACATAATGACTGAAGCTAACTTT  
GGTTGGTTAATCCGATCAGTTCATCGATGGTTCGGCAAGTATGATGGTCTAATGATGATCCTGCATGTATTTTCGTGT  
GTATCTTACCGGTGGATTTAAAAAACCTCGCGAATTGACTTGGGTTACGGGTGTGGTTTTGGCCGATTGACCGCATCT  
TTTTGGTGTAACTGGTTATTCTTACCTCGGGACCAAAATTGGTTATTGGGCAGTCAAATTTGTGACAGGTGTACCTGA  
AGCCATTCTGTATAGGATCACCCCTTGGTAGAGTTATTACGCGGAAGTGTAGTGTGGGTCAATCCACTTTGACTCGT  
TTTTTATAGTTTTACA

CACTTTTGTATTACCTCTTCTTACTGCCGATTTTATGTTAATGCACTTCCCAATGATACGTAAGCAAGGTATTTCTGGTC  
CTTTA---  
ATGGGAGTAACAAAGAAACCTGACTTGAATGATCCTGTATTAAGAGCTAAATTGGCTAAAGGGATGGGTATAATTATTA  
CGGAGAACCCCGCTGGCCCAACGATCTTTTATATATTTTTCCAGTAGTAATTCTAGGTACTATTGCTTGTAACGTAGGTT  
TAGCAGTTCTAGAACCATCAACGATTGGTGAACCAGCAGATCCATTTGCAACTCCTTTGGAAATATTACCCGAATGGTAC  
TTTTTTCCCGTATTTCAAATACTCCGTACAGTACCCAATAAATTATTAGGTGTTCTTTTAATGGTTTTAGTACCTGCGGG  
ATTATTGACAGTACCCTTTTTGGAGAATGTTAATAAATCCAAAATCCATTTGCTCGTCCAGTGGCTACAACCGTCTTTT  
TGATCGGTACCGCAGTAGCTCTTTGGTTGGGTATTGGGGCAACATTACCTATTGATAAATCTCTAACTTTAGGTCTTTTT  
CAAATTGATTCAACCATAAAAATAA-----  
ATGGTTGAAGTTTTTCTATTTGGAATCGTGTTAGGTCTAATTCCTATTACTTTGGCTGGATTATTCGTAACGTGCATATTT  
GCAATACAGACGCGGTGATCAGTTGGACCTT-----  
ATGCCTACTATAACT-----  
AGTTATTTTCGGTTTTTCTACTGGCAGCTTTAACTATAACCTCAGCTCTATTTATTGGTCTGAGCAAGATA-----  
CGACTTATTTGA-----  
-----

ATGGATATAGTAAGTCTCGCTTGGGCTGCTTTAATGGTAGTCTTTACATTTTCTCTTTCACTCGTAGTATGGGGAAGAAG  
TGGACTC---ATGATTATTCGTTTCGCCGGAATCA-----GAAGTAAAA-----  
ATTTTGGTGGATAGGGATCCCGTAAAAACTTCTTTTCGAGGAATGGGCCAGACCGGGTCAATTTCTCAAGAACACTAGCTAA  
AGGCCCTGAGACTACCCTTGGATCTGGAACCTACATGCCGATGCTCACGATTTTCGATAGCCATAACAGTGATTTGGAGG  
AGATCTCTCGAAAAGTATTTAGTGCCCATTTTCGGTCAACTCTCCATCATCTTTCTTTGGCTGAGTGGCATGTATTTCCAT  
GGTGCTCGTTTTTCCAATTATGAAGCATGGCTAAGTGATCCTACTCACATTAGACCCAGCGCTCAGGTGGTTTTGGCCAAT  
AGTGGGCCAAGAAATATTGAATGGTGATGTGGGTGGAGGTTCCGAGGAATACAAATAACCTCTGGTTTTCTTTAGATTT  
GGCGAGCTTCTGGAATAACTAGTGAATTACAACCTCTATTGTACCGCAATTGGTGCATTGGTCTTTGCAGCGTTAATGCTT  
TTTGCTGGTTGGTTCCATTATCACAAGCTGCTCCAAAATTGGCTTGGTTCCAAGATGTAGAATCTATGTTGAATCACCA  
CTTAGCAGGGTTACTAGGGCTTGGGTCTCTTTCTTTGGGCGGGACACCAAGTACATGTATCTTTACCGATTAACCAATTT  
TAGACGCTGGAGTAGATCCTAAAGAGATCCCACTTCCCTCATGAATTTATCTTGAATCGGGATCTTTTGGCTCAACTTTAT  
CCTAGTTTTGCGGAGGGAGCAACCCCATTTTTACCTTGAATTGGTCAAAAATATGCGGACTTTCTTACTTTTCGTGGAGG  
ATTAGATCCAGTAACAGGGGCTCTATGGCTGACCGATATTGCACACCATCATTTAGCTATTGTCAGTTCTTTTCTGATAG  
CAGGTACATGTATAGGACCAACTGGGCCATTTGGTCATGTTTGAAGGATATTTTAGAGGCCATAAAGGTCCATTTTACA  
GGCCAGGGACATAAAGGCCCTCTATGAGATCCTAACAACGTCTATGGCATGCTCAATTATCTTTAACTAGCTATGTTAGG  
CTCTTTAACCATTGTTGTAGCTCACCATATGTATTCCATGCCTCCTTATCCATATCTAGCTACTGACTATGGTACACAAC  
TTTTCGTTGTTACACATCATATGTGGATCGGTGGATTTCTCATAGTTGGTGCTGCTGCGCATGCAGCCATTTTTATGGTA  
AGAGACTATGATCCAACACTCGATAACAACGATCTATTAGATCGTGTCTTAGGCACCGTGATGCAATCATATCACATCT  
CAACTGGGCATGTATATTTCTAGGCTTTCATAGTTTTGGTTTTGTATATTCATAATGATACCATGAGCGCTTTAGGGCGTC  
CCCAAGATATGTTTTTCAGATACCGCTATAACAATTACAACCT---  
GTCTTTGCTCAATGGGTACAAAACACCCATGCTTTAGCACCTGGTGAACAGCTCCTGGTGCAACAACAAGCACCAGCTT  
GACTTGGGGGGTGGTGATTTAGTAGCAGTAGGTGGCAAAGTAGCTTTGTTACCTATTCCATTAGGAAGTGCAGATTTTT  
TGGTACATCACATTCATGCATTTACGATCCATGTGACGGTATTGATACTACTGAAAGGTGTTCTATTTGCTCGTAGCTCC  
CGTTTTGATACCTGATAAAGCAAATCTTGGTTTTCGTTTTCCCTTGTGACGGACCTGGAAGAGGGGGGACATGTCAAGTATC  
CGCCTGGGATCATGTCTTCTTAGGTCTATTCTGGATGTACAATGCAATTTCCGGTAGTAATATTCCATTTAGTTGGAAAA  
TGCAGTCCGATGTTTTGGGGTAGTATAAGTGATCAAGGGGTGGTAACCTCATATTACGGGAGGAAACTTTGCGCAGAGTTCC  
ATTACTATTAATGGGTGGCTCCGTGATTTTTTATGGGCACAGGCATCCCAGGTAATTCAGTCTTATGGTTCTTCATTATC  
TGCATATGGCCTTTTTTCTAGGTGCTCATTGTTGCTGGGCTTTCAGTTAATGTTTCTATTC---  
AGCGGCCGTGGTTATTGGCAAGAACTTATTGAATCCATCGTTTTGGGCTCATAACAAATTTAAAGTTGCTCCTGCTATTCA  
GCCTAGAGCCTTGAGCATTGTACAAGGACGTGCTGTAGGAGTAACCTATTACCTTCTGGGTGGAATTGCCACAACATGGG  
CATTCTTCTTAGCAAGAATTATTGCAGTAGGA---  
ATGGCATTAAAGATTTCCAAGGTTTAGCCAAGGCTTAGCTCAGGACCCCACTACTCGTCGATTTGGTTTTGGTATTGCTAC  
CGCACATGACTTCGAAAGTTCATGATGATATTACTGAGGAACGTCTTTATCAGAATATTTTTGCTTCTCACTTCGGGCAGT  
TAGCAATAATTTTTCTGTGGACTTCCGGAAATCTTTTTCATGTAGCTTGGCAAGGAAATTTTGGTTCATGGGTACGGGAC  
CCTTTACATGTAAGACCTATTGCTCATGCAATTTGGGATCCTCATTGTTGGTCAACCGGCTGTGGAAGCCTTTACTCGAGG  
GGGTGCTCTCGGTCCAGTGAATATCGCTTATTCTGGTGTATTATCAGTGGTGGTATAACAATCGGCTTACGCACTAATGAAG  
ATCTTTTACTGGAGCTCTTTTTCTATTATTTCTTTCTGCCGATCCTTAATAGCGGGTTGGTTACACCTACAACCGAAA  
TGGAACCAAGCGTTTCATGGTTTTAAAATGCGGAATCTCGTCTCAATCATCATTTGTCAGGACTCTTCGGAGTAAGTTC  
CTTGGCTTGGACAGGGCATTAGTTTCAT

Populus

CGGACCCTGCTGCTAAGAAGGATGCTCACTTCTTAAAATATCCCATATACGTAGGCGGGAACAGGGGAAGGGGTGAGATT  
TATCCCGACGGGAGCAAGAGTAACAATACGGTTTATAATGCTACAGCAGCGGTATAGTAAGCAAAATCATACGAAAAGA

A---

AAAGGGGGGTACGAAATAACTATAACAGATGCGCCAGAGGGGGCGTCAAGTGATTGATAGTATCCCCCAGGACCAGA  
TCTTGTTCAGAAAGGCGAATCCATCAAACCTCGATCAACCATTAACAAGTAATCCTAATGTGGGCGGATTTGGT  
ACGCAGAAATAGTACTTCAAGACCCATTACGTGTCCAAGGCCTTTTGTCTTCTTGGCATCCGTTATTTTGGC  
CAAAATCTTTTGGTTCTT---AAAAAGAAACAGTTTGAGAAGGTTCAATTGTCCGAAATG---AATTTCT---  
ATGAGTAAAGTATATGATTGGTTTCGAAGAACGTCTTGAGATTTCAGACGATTGCAGATGATATAACTAGTAAATAC  
GTTTCCCTCATGTCAACATATTTTATTGTTTAGGAGGAATTACGCTTACTTGTTTTTTAGTACAAGTAGCTACGGG  
ATTTGCTATGACTTTTTACTATCGTCCGACCGTTACTGAGGCCTTTGCTTCTGTTCAATATATAATGACTGAAGCT  
AACTTTGGTTGGTTAATCCGATCAGTTCATCGATGGTCGGCAAGTATGATGGTCCTAATGATGATCCTGCACGTAT  
TTTCGTGTGTATCTCACGGGTGGCTTTAAAAAACCTCGTGAATTGACTTGGGTTACAGGTGTGGTTCTTGGTGTAT  
TAACCGCATCCTTTGGCGTAACTTTGGTTGGTCTGTTACAGGTGTGGTTCTTGGTGTATTAACCGCATCCTTTGG  
CGTAACTTTGGTTGGTCTGTTACCTTGGGACCAAATTGGTTATTGGGCAGTAAAAATTGTAACAGGCGTGCCGGA  
AGCTATTCCGGTAAATAGGATCTCCTTTGGTAGAGTTATTACGTGGAAGTGCTAGTGTAGGACAATCCACTTTG  
ACTCGTTTTTATAGTTTTACACTTTTTGTATTACCTCTTCTTACTGCCGATTTTATGTTAATGCATTTTCCAAT  
GATACGTAAGCAAGGTATTTCCGGTCTTTA---  
ATGGGAGTGACAAAAAACCTGACTTGAATGATCCTGTATTAAGAGCTAAATTGGCTAAAGGAATGGGTCTATAAT  
TATTAATCGGAGAACCCTCGCATGGCCAAATGATCTTTTATATATTTTCCAGTAGTAATTCTAGGTACTATTGCAT  
GTAATGTAGGATAGCGGTTCTAGAACCATCAATGATTGGTGAACCTGCAGATCCATTTGCAACTCCTTTGGAAAT  
ATTGCCTGAATGGTATTCTTTCCCGTATTTCAAATACTTCGTACAGTACCCAATAAGTTATTGGGTGTTCTTTTAA  
TGGTTTTTCAGTACCTGCGGGATTATTAACAGTACCCTTTTGGAGAATGTTAATAAAATTTCAAATCCATTTTC  
GTCGTCCGGTTCGCGACAACCTGTTTTTGTATTGGTACTGTAGTGGCCCTTTGGTTGGGTATTGGAGCAACATT  
ACCTATTGATAAATCCTTAACCTTTAGGTCTTTTTCAAATGATTCAATT-----  
ATGATTGAAGTTTTTCTATTTGGAATCGTCTTAGGTCTAATTCCTATTACTTTGGCTGGATTATTCGTAACCTG  
CTTATTTACAATACAGACGTGGTGACCAGTTGGATCTT-----  
ATGCCCACTCTAACT-----  
AGTTATTTTGGTTTTCTGTTAGTAGCTTTAACTATAACTTTAGTTCTATTTATTAGTCTGAGCAAGATA-----  
CGACTTATT-----

ATGGATATAGTAAGTCTCGCTTGGGCTGCTTTGATGGTAGTCTTTACATTTTCCCTTTCACTCGTAGTATGGGGA  
AAGAAGTGGACTC---ATGATTATTCGTTTCGCCGGAACCA-----GAAGTAAAA-----  
ATTTTGGTAGATAGGGATCCCATCAAACCTTCTTTTCGAGGAATGGGCCAGACCCGGTCAATTTCTCAAGAACA  
ATAGCTAAAGGACCTGATACTACCCTTGGATCTGGAACCTACATGCTGATGCTCACGATTTTCGATAGCCATA  
ACCAGTGATTTGGAAGAGATCTCCCCGAAAAGTCTTTAGTGCTCATTTCGGCCAACCTCTCCATCATCTTTCTT  
TGGCTGAGTGGCATGTATTTCCACGGTGCTCGTTTTTCCAATTATGAAGCATGGCTAAGCGATCCTACTCACATT  
GGGCCTAGCGCCCAAGTAGTTTGGCCAATAGTGGGCCAAGAAATATTGAATGGTGTGTGGGTGGGGGTTCCGAG  
GAATACAAATAACCTCCGGTTTTTTTTTCAGATTTGGAGAGCATCTGGAATAACTAGTGAATTACAATTGTATT  
GTACGGCAATTGGTGCATTGGTCTTTGCAGCCTTAATGCTTTTGCTGGTTGGTTCCATTATCACAAAGCTGCT  
CCAAAATTTGGCTTGGTTCCAAGATGTAGAATCTATGTTAAATCACCAATTTAGCAGGGCTACTAGGGCTTGG  
GTCTCTTTCTTGGCGGGGCATCAAGTCCATGTATCTTTACCAATTAACCAATTTCTAAACGCTGGAGTAGAT  
CCTAAAGAGATCCCCTTCTCATGAATTTATCTTGAACCGGGATCTTTTGGCTCAACTTTATCCCAGTTTTG  
CTGAGGGAGCAACCCATTTTTCACTTTGAATTGGTCAAAATATTCGGAATTTCTTACTTTTCGTGGAGGATT  
TAGACCCAGTAACTGGGGGTCTATGGCTGACCGATATTGCACACCACCTTTAGCTATTGCAATTTCTTTTCT  
GTTAGCGGGTCACATGTATAGGACTAACTGGGGCATTGGTCATGGTATAAAAGATATTTTAGAGGCTCATAA  
AGGTCCATTTTACAGGTCAGGGTCTATAAGGGCCTATATGAGATCCTAACAACGTGCATGGCATGCTCAATTAT  
CTCTTAACCTAGCTATGTTAGGTGTACACATGTTTACACATCACATGTGGATTGGTGGATTTCTCATAGTTGG  
TGTGCTGCGCATGCAGCCATTTTTATGGTAAAGACTACGATCCGACTACTCGATAACAACGATCTGTTAGATCG  
TGTCTTTAGGCATCGCGATGCAATCATATCACATCTTAACAGATATGTTTTCAGATACTGCTATAACAATTACA  
ACCT---  
GTCTTTGCTCAATGGATACAAAAACACGCATGCTTTAGCACCTGGTGAACCGCTCCTGGTGAACAGCAAGCAC  
CAGTTTGACTTGGGGGGCGATGACTTAGTGGCAGTGGGGGGCAAGGTTGCTTTGTTACCTATTCCATTAGGA  
ACCGCGGATTTTTTGGTCCATCACATTCATGCATTTACGATTCATGTGACGGTATTGATACTCCTGAAAGGAG  
TCTATTTGCCCGTAGCTCTCGTTTTGATACCAGATAAAGCAAATCTTGGTTTTCGTTTTCCCTTGTGATGGAC  
CTGGAAGAGGGGGGACATGTCAAGTATCCGCTTTGGGATCATGTCTTCTTAGGACTCTTTTGGATGTACAAT  
GCAATTTTCGGTAGTAATATTCCATTTTCAGTTGGAAAAATGCAATCAGATGTTTGGGGTAGTATAAGTGAT  
CAAGGGGTGGTAACTCATATCACGGGAGGAAATTTGCGCAGAGTTCTATTACTATTAATGGATGGCTCCGCG  
ATTTCTTATGGGCACAGGCATCCCAGGTAATTCAGTCTTATGGTTCTTCATTATCTGCATATGGCCTTTTT  
TCTAGGCGCTCACTTTGTATGGGCTTTTAGTTAATGTTTCTATTCT---  
AGCGGTCTGTGGTTATTGGCAAGAACTTATTGAATCAATCGTTTGGGCTCATAATAAATTAAGGTTGCTCCTG  
CTACTCAACCTAGAGCCTTGAGCATTATAACAAGACGTGCTGTAGGAGTAACTCATTACCTTCTGGGTGGAAT  
TGCCACAACATGGG

CGTTCTTCTTAGCAAGAATTATTGCAGTAGGA---  
ATGGCATTAAAGATTTCCAAGGTTTAGCCAAGGCTTAGCTCAGGACCCACTACTCGTCGTATTTGGTTTTGGTATTGCTAC  
CGCGCATGACTTCGAGAGTCATGATGATATTACGGAGGAACGTCTTTATCAGAATATTTTTGCTTCTCACTTCGGGCAAT  
TAGCAATAATTTTTCTGTGGACTTCCGGAAATCTGTTTCATGTAGCTTGGCAGGGAAATTTTGAACATGGGTACAGGAC  
CCTTTGCATGTAAGACCTATTGCTCATGCAATTTGGGATCCTCATTTTGGTCAACCGGCCGTGGAAGCTTTTACTCGAGG  
GGGTGCTCTTGGCCCAGTGAATATCGCTTATTCTGGTGTATCAGTGGTGGTATACGATAGGTTTACGTACTAATGAAG  
ATCTTTATATTGGAGCTCTTTTTCTATTATTTCTTTCCGCCGTATCCCTACTAGGGGGTTGGTTACACCTACAACCGAAA  
TGGAACCTAGCGTTTCGTGGTTCAAAAATGCCGAATCTCGTCTCAACCACCATTTGTCAGGACTATTTGGAGTAAGTTC  
CTTGGCTTGGACAGGACATTTAGTCCAT

Ranunculus

CAGACCCTCTTACTAATAAAGACGTTTATTTTTTAAAATATCCTATATACGTGGGCGGTAATAGGGGAAGGGGTGAGATT  
TATCCTGATGGGAGTAAGAGTAACAATACAGTCTATAATTCTACAGCATCGGGTATAATAAGCAAATTTGTACGTAAAGA  
A---

AAGGGGGGGTATGAGATAACCATAGGGGATGTATCAGACGGACGCTCGGTGCTTGATATTATACCTCCGGGCCCCGGA  
TCTTGTTCAGAGGGTGAATCCATCAAGCTTGATCAACCATTAACGAGCAATCCCAATGTGGGTGGATTTGGTCAGGGGG  
ATGCCGAAATAGTACTTCAAGACCCATCGCGCGTCCAAGGCCTTTTTTCTTCTTGGCGTCCGTTATTCTGGCACA  
TTTTTGGTTCTT---AAAAGAAACAGTTTGAGAAGGTTCAATTGTCCGAAATG---AATTTCT-----  
AAAGTATATGATTGGTTCGAAGAGCGTCTCGAGATTAGGCGATTGCAGATGATATAACTAGTAAATATGTTCCCTCCTCA  
TGCAACATATTTTATTGTCTAGGGGGGATTACACTTACTTGTTTTTTAGTACAAGTAGCCACAGGGTTTGGCATGACTT  
TTTACTATCGTCCGACCGTTACCGAGGCTTTTGCCTCAGTTCAATACATAATGACTGAAGCCAACCTTTGGTTGGTTAATT  
AGATCAGTTCATCGATGGTTCGGCAAGTATGATGGTTCTAATGATGATCCTGCACGTATTTTCGTGTGTATCTCACCGGTGG  
GTTTAAAAAACCTCGCGAATTAACCTTGGGTTACGGGTGTGGTTCTGGGTGTATTGACCGCATCTTTTGGTGTAAACCGGTT  
ATTCTTTACCTTGGGACCAAATTTGGTTATTGGGCAGTAAAAATTTGTGACAGGCGTACCTGACGCGATTCTGTAAATAGGA  
TCGCCCTTAGTCGAGTTATTGCGTGGAAAGTGCTAGTGTGGGTCAATCAACTTTAACTCGTTTTTATAGTTTACACACATT  
TGTATTACCCCTTCTTACCGCTGTATTTATGTTAATGCATTTCCAATGATTTCGTAAGCAAGGTATTTCTGGTCTTTA-

-----  
AACAAAGAAACCTGACTTAAATGATCCTGTATTAAGAGCTAAATTTGGCAAAGGGATGGGTGATAATTATTATGGCGAAC  
CTGCATGGCCAAACGATCTTTTATATATTTTTCCAGTAGTAATTTCTAGGTAATTTGCATGTAATGTGGGTTTAGCGGTT  
TTAGAACCATAATGATTGGTGAACCCCGGATCCGTTTGAACCTCCTTTGGAAATATTACCTGAATGGTACTTTTTTCC  
CGTATTTCAAATACTTCGTACAGTACCCAATAAGTTATTGGGAGTTCTTTTAAATGGTTTTCAGTACCGGCAGGATTATTAA  
CAGTACCTTTTTTGGAGAATGTTAATAAATTTCCAAAACCCGTTTCGTGTCAGTAGCTACAACCGTCTTTTTGATTGGT  
ACTGCAGTAGCCCTTTGGTTGGGTATTGGAGCAACATTACCTATAGATAAATCTTTAACTTTAGGTCTTTTT-----

-----  
ATGATTGAAGTTTTACTATTTGGAATCGTGTTAGGCTTAATTCCTATTACTTTGGCTGGATTATTCGTAACCTGCATATTT  
ACAATATAGACGCGGTGATCAGTTGGACCTT-----  
ATGCCTACTATAACT-----  
AGTTATTTTCGGTTTTCTCCTGGCGGCTTTAACTATAACCTCCGCTTTATTTATTGGTCTGAGCAAGATA-----  
CGGCTTATT-----

-----  
ATGGATATAGTAAGTCTTGCTTGGGCTGCTTTAATGGTAGTCTTTACATTTTCCCTTTCACTTGTAGTATGGGGAAGAAG  
TGGACTA---ATGATTATTCGTTTCGCCGGAATCA-----GAAGTTAAA-----  
ATTTTGGTGGATAGGGATCCCGTAAAACTTCTTTTCGAGGAATGGGCCAGACCGGGCCATTTCTCAAGAACAATAGCTAA  
AGGACCGGATACTACAACCTGGATCTGGAACCTACATGCCGATGCTCACGATTTTTCAGAGCCATACCAGTGAATTTGGAGG  
AGATCTCTCGAAAAGTATTTAGTGCCCATTTTCGGTCAACTCTCCATCATATTTCTTTGGCTGAGTGGGATGTATTTCCAC  
GGTGCCCGTTTTTCCAATTATGAAGCATGGCTAAGTGACCCTACTCACATTGGACCCAGTGCAGGTTGGTTTTGGCCAAT  
AGTGGGCCAAGAAATATTGAATGGTGTATGTCGGCGGAGGTTTCCGAGGAATCCAAATAACCTCTGGGTTTTTTCAGATTT  
GGCGAGCATCCGGAATAACGAGTGAATTGCAGCTCTATTGTACTGCAATTTGGTGCATTTGGTTTTTCCGCGTTAATGCTT  
TTTGGCGGTTGGTTCCATTATCACAAGCTGCTCCAAAGTTGGCTTGGTTCCAAGATGTAGAATCTATGTTGAATCACCA  
CTTAGCAGGGTTACTAGGACTTGGGTCTCTTTCTTGGGCGGGGCATCAAGTACATGTATCTTTACCGATTAACCAATTTTC  
TAGACGCTGGAGTAGATCCTAAAGAGATCCCCTTCTCATGAATTTATCTTGAATCGGGATCTTTTGGCTCAACTTTAT  
CCTAGTTTTTGGCGAGGGAGCAACCCCTTTTTTACCTTGAATTGGTCAAAATATGCAGAATTTCTTACTTTTTCTGGAGG  
GTTAGATCCAGTAACGGGAGGTCTATGGCTGACAGATATTGCACACCATCATTTGGCTATTGCAGTTCTTTTTCTGATAG  
CCGGTACATGTATAGGACTAATTGGGGTATTGGTTCATGGCCTGAAAGATATTTTAGAGGCTCATAAAGGACCATTTACT  
GGCCAGGGCCATAAAGGTCTATATGAGATCCTAACAACGTCATGGCATGCTCAATTATCTCTTAACTTAGCTATGTTAGG  
CTCTTTAACTATTGTTGTAGCTCACCATATGATTCCATGCCCTTATCCATATCTAGCTACTGACTATGGTACACAAC  
TTTTCGTTGTTACACATCAGATGTTGGTTCATAGTTGGTGTGCTGCTGCCATGCAGCCATTTTTATGGTA  
AGAGACTATGATCCAACCTACTCGATACAACGATCTCTTAGATCGTGTACTTAGGCACCGCATGCAATCATATCAGATCT

CAACTGGGCATGTATTTTTCTAGGCTTTCACAGCTTTGGTTTTGTATATTCATAATGATACCATGAGCGCTTTAGGGCGCC  
CTCAAGATATGTTTTTCAGATACCGCTATAACAATTACAACCC---  
ATCTTTGCTCAATGGATACAAAACACCCATGCTTTAGCACCCGGTGTAAACAGCTCCTGGTGCAACAGCAAGCACCAGCTT  
GACTTGGGGTGGTGGTGCTTTAATAGCAGTAGGCGGCAAAGTAGCTTTGTTACCTATTCCATTAGGAACCGCAGATTTTT  
TGGTACATCATATTCATGCATTTACGATCCATGTGACGGTATTGATATTATTGAAAGGTGTTCTATTTCGCTCGCAGTTCC  
CGTTTTGATACCTGATAAAGCCAATCTTGGTTTTTCGTTTTCCCTTGTGACGGGCTTGGAAAGAGGAGGGACATGTCAAGTATC  
CGCCTGGGATCATGTCTTCTTAGGTCTATTTGGATGTACAATGCTATTTCCGGTAGTCATATTTTATTTCAGTTGGAAAA  
TGCAATCCGATGTTTTGGGGTAGTATAAACGATCAAGGGGTGGTAACTCATATCACGGGAGGAAACTTTGCGCAGAGTTCC  
ATTACTATTAATGGGTGGCTACGCGATTTTTTATGGGCCAGGCATCCCAGGTAATTCAGTCTTATGGTTTCGTCAATTATC  
CGCATATGGCCTTTTTTTCCTAGGTGCTCATTTTGTATGGGCTTTCAGTTAATGTTTTTATTC---  
AGTGGCGCGGTTTATTGGCAAGAACTTATTGAATCTATCGTTTTGGGCTCATAACAAGTTAAAAGTTGCTCCTGTATTCA  
GCCTAGAGCCTTGAGTATTGTACAAGGACGTGCTGTAGGAGTAACCCATTACCTTCTGGGTGGAATTGCCACAACGTGGG  
CATTCTTCTTAGCAAGAATTATTGCAGTAGGA---  
ATGGCATTACGATTTCCAAGGTTTAGCCAAGGCTTAGCTCAGGACCCACTACGCGTCGTATTTGGTTTTGGTATTGCTAC  
CGCGCATGACTTCGAGAGTCATGATGATATTACTGAGGAACGTCTTTATCAGAATATTTTTGCTTCTCACTTCGGGCAGT  
TAGCAATAATTTTTCTGTGGACTTCCGGAAATCTGTTTCATGTAGCTTGGCAAGGAAATTTGAGTCATGGGTACAGGAC  
CCTTTACATGTAAGACCTATTGCTCATGCAATTTGGGATCCCCATTTTGGTCAACCGGCTGTAGAAGCCTTTACTCGAGG  
GGGTGCTCTCGGCCAGTGAATATCGCTTATTCGGGCGTTTTATCAGTGGTGGTATAACAATTGGCTTACGCACAAATGAAG  
ATCTTTTACTGGGGCGCTTTTTTATTATTTCTTTCTGCCATATCCTTAATAGCGGGTTGGTTACACCTACAACCGAAA  
TGGAACCAAGTGTTCGTGGTTCAAAAATGCCGAATCTCGTCTTAATCATCATTTGTCAGGACTCTTCGGGGTAAGTTC  
CTTGGCTTGGACGGGGCATTTAGTTCAT

Spinacia

CGGACCCTGCCACTAAAAAAGACGTTCACTTCTTAAAATATCCGATATATGTAGGTGGTAACAGGGGAAGGGGTCAAATT  
TATCCTGACGGAAGCAAGAGTAATAATACAGTTTATAATTCCACAGCAACAGGTATAGTAAAGAAAATTGTACGAAAAGA  
A---

AAGGGCGGATACGAAATAAACATAGCGGATGCCTCGGATGGACGTGAAGTGGTTGATATTATCCCTCGAGGACCAGAGCT  
TCTTGTTCGAGAGGTGAATCTATCAAACCTTGATCAACCATTAACGAGTAATCCTAATGTGGGTGGGTTTGGTCAGGGAG  
ACGCAGAAGTAGTACTCAAGACCCACTGCGCATACAAGGCTTTTTTTTTCTTTGCGTCTGTTATTTTAGCACAAATC  
TTTTTGGTTCTT---AAAAAGAAACAATTCGAGAAGGTTCAATTTGTCGGAATG---AATTTCT---

ATGAGTAAAGTCTATGATTGGTTTCAAGAACGTCTCGAGATTAGGCGGATTGCGGATGATATAACTAGTAAATATGTTCC  
TCCTCATGTCAACATATTTTATTGTCTAGGCGGAATTACGCTTACTTGTTTTTTAGTACAAGTAGCTACAGGGTTTGCGA  
TGACTTTTTACTATCGTCCAACCGTTACTGATGCTTTTGCTTCTGTTCAATATATAATGACTGAAGTCAACTTTGGTTGG  
TTAATACGATCCGTTTCATCGGTGGTTCGGCAAGTATGATGGTTCTAATGATGATCCTGCATGTATTTTCGTGTGTATCTTAC  
CGGTGGGTTTTAAAAACCTCGAGAATTGACTTGGGTTACAGGCGTGGTTCTGGGTGTATTGACCGCGTCTTTTGGAGTAA  
CTGGTTATTCTTACCTTGGGACCAAATTGGCTATTGGGCAGTAAAAATTGTAACAGGCGTACCGGATGCTATTCTCTGTA  
ATAGGATCGCCTTTGGTAGAGTTATTACGTGGAAGTGTAGTGTGGGACAATCTACTTTGACTCGTTTTTATAGTTTTACA  
CACTTTTGTATTGCCTCTTCTTACTGCCGATTTTATGTTAATGCATTTCTAATGATACGTAACAAGGTATTTCTGGTC  
CCTTA---

ATGGGAGTAACAAAAAACCTGACTTGAATGATCCTGTATTAAGGGCTAAATTAGCGAAAGGTATGGGGCATAATTATTA  
TGGGGAGCCCGCTGGCCTAATGATCTTTTATATATTTTTCTGTAGTAATTTTAGGTACTATTGCGTGTAAACGTAGGCT  
TAGCAGTTTTAGAACCATCAATGATTGGCGAGCCGGCGGATCCATTTGCAACTCCTTTGGAAATATTACCTGAATGGTAT  
TTTTTCTCTGTATTTCAAATACTTCGTACAGTACCAAATAAGTTATTAGGCGTTCTTTTAAATGGCTTCAGTACCTGCGGG  
ATTATTAACAGTTCCTTTTTTAGAAAATGTTAATAAATCCAAAATCCATTTTCGTCTCCAGTAGCTACAACCTGTCTTTT  
TGGTTGGTACCGTAGTGGCCCTTTGGTTAGGTATTGGAGCAACATTACCTATTGATAAATCCCTAACTTTAGGCCTTTTT  
-----

ATGATTGAAGTTTTTCTATTTGGAATCGTCTTAGGTCTAATTCCTATTACTTTGGCTGGATTATTTGTAAGTGCATATTT  
ACAATATAGACGTGGTGATCAGTTGGATCTT-----

ATGTCTACTCTAACT-----

AGTTATTTTCGGTTTTTTACTAGCGGCTTTAACTATAACTTCCGCTTTATTTATAGGTCTAAACAAGATA-----  
CGACTTATT-----

ATGGATATTGTAAGTCTCGCTTGGGCTGCTTTAATGGTAGTCTTTACATTTTCTCTTTCACTTGTAGTATGGGGAAGAAG  
TGGACTC---ATGATTATTCGTTTCGCCGGAACCA-----GAAGTAAA-----

ATTTTGGTAGATAGGGATCCCGTAAAAACTTCGTTTGGAGCATGGGCCAAACCTGGTCAATTTTTCAAGAACAATAGCTAA  
GGGCCCTGAAACTACTACATGGATCTGGAACCTACATGCTGATGCTCACGATTTTCGATAGCCATAACAGCGATTTGGAGG  
AGATCTCCCGAAAAATTTTTAGTGCCCATTTTCGGTCAACTCTCCATCATCTTTCTTTGGCTGAGTGGTATGATTTCCAC  
GGTGCCCGTTTTTCCAATTATGAAGCATGGCTAAGCGATCCTACTCACATTGGACCTAGTGCCCAAGTAGTTTGGCCGAT



AGTGGGTCAAGAAATATTGAATGGTGATGTAGGGGGAGGTTTCCGAGGAATACAAATAACCTCTGGGTTTTTTCAAATTT  
GGCGAGCATCTGGAATAACTAGTGAATTACAACCTTTATTGTACCGCAATTGGTGCATTGGTCTTTGCAGCATTAAATGCTT  
TTTGCTGGTTGGTTCCATTATCACAAAGCGGCTCCAAAATTAGCTTGGTTCCAAGATGTGGAATCTATGTTGAATCACCA  
TTTAGCAGGACTACTAGGACTTGGGTCTCTTTCTTGGGCGGGTCATCAAATCCATGTATCTTTACCGATTAACCAATTTT  
TAAATGCTGGAGTAGATCCTAAAGAGATACCGCTTCCCTCATGAATTAATCTTGAATCGGGATCTTTTGGCTCAACTTTAT  
CCCAGTTTTGGCCGAAGGAGCAACCCCGTTTTTCACTTTGAATTGGTCAAAATATGCGGACTTTCTTACTTTTTCGTGGAGG  
GTTAGACCCAGTAACTGGAGGTCTGTGGCTGACCGATACTGCACACCATCATTTAGCTATTGCAATTCTTTTCTGATAG  
CGGGTCATATGTATAGAACGAACCTGGGGCATTGGGCATGGTCTAAAAGATATTTTAGAGGCTCATAAAGGTCCATTTACG  
GGCCAGGGACATAAAGGCTTATATGAGATCTTAACAACGTCATGGCATGCTCAATTAGCTCTTAACCTAGCTATGTTAGG  
TTCTTTAACCATCGTTGTAGCTCATCATATGTATGCGATGCCCTTATCCATATCTAGCTACTGACTATGGTACCCAAC  
TTTTATTGTTTTACACATCACATGTGGATTGGTGGATTTCTCATAGTTGGTGTCTGCTGCGCATGCGGCCATTTTTATGGTA  
AGAGACTATGATCCAACCTACTCGATAACAACGACCTATTAGATCGGGTTCTTAGACATCGCGATGCAATCATATCACATCT  
TAACTGGGCATGTATATTTCTAGGATTTTACAGTTTTGGTTTTATATATTCATAATGATACCATGAGTGCTTTAGGGCGTC  
CTCAAGATATGTTTTAGATACCGCTATAACAATTACAACCT---

GTCTTCGCTCAATGGATACAAAACACCCATGCTTTAGCGCCTAGTGCAACGGCTCCGGGTGCAACAGCAAGCACCAGTTT  
GACTTGGGGAGGTAGTGATTTAGTAGCAGTGGGTGGAAAAGTAGCCTTGTTACCCATTCCACTAGGGACCGCAGATTTTT  
TAGTCCACCACATTCATGCTTTTTACAATTCATGTGACGGTACTAATACTTCTAAAAGGCGTTCTATTTGCTCGTAGCTCT  
CGTTTTGATACCGGATAAAGCAAATCTTGGGTTTTCGCTTCCCTTGTGATGGACCTGGAAGAGGGGGAACATGCCAAGTATC  
CGCGTGGGATCATGTATTCTTAGGGCTATTCTGGATGTACAACCTCAATTTCCGGTAGTAATATTTTCAATTTAGTTGAAAA  
TGCAGTCAGATGTTTTGGGGTAGTATAAGCGATCAAGGGGTGGTAACTCATATCACTGGAGGAACTTTGCGCAAAGTTCT  
ATTACTATTAATGGGTGGCTACGTGATTTCTTATGGGCGCAAGCATCCCAGGTAATTCAGTCTTACGGTTCTTCATTATC  
TGCATATGGTCTCTTTTTCTAGGTGCTCATTTTTGTATGGGCTTTTAGTTTTAATGTTTTTATTT---

AGCGGGCGTGGTTATTGGCAAGAACTTATTGAATCCATCGTTTTGGGCTCATAATAAATTTAAAGTTGCTCCTGCTACTCA  
GCCTAGAGCCTTGAGCATTGTACAAGGACGTGCTGTAGGAGTAACCCATTACCTTCTGGGTGGAATTGCCACAACATGGG  
CGTTCTTCTTAGCAAGAATTATTGCAGTAGGA---

ATGGCATTAAAGATTTCCAAGGTTTAGCCAAGGCTTAGCTCAGGACCCACTACTCGTCGTATTTGGTTTTGGTATTGCTAC  
CGCACATGACTTCGAGAGTCATGATGATATTACTGAAGAACGTCTTTATCAGAATATTTTTGCTTCTCACTTTGGGCAAT  
TAGCAATCATTTTTCTGTGGACTTCCGGAAATCTGTTTTCATGTAGCTTGGCAAGGAAATTTTGGTACTGGGTACAGGAC  
CCTTTACACGTAAGACTTATTGCTCATGCAATTTGGGACTCTCTTTGGTCAACCTGCTGTAGAAGCTTTTACTCGGGG  
AGGTGCTCTTGGCCCACTGAATATCGCTTATTCTGGTGTATCAGTGGTGGTATACAATAGGTTTACGCACTAATGAAG  
ATCTTTATACTGGAGCTCTTTTTCTATTATTTCTTTCTGTTATATCTTTACTAGGGGGTTGGTTACACCTACAACCAAAA  
TGGAAACCGAGCGTTTTCGTGGTTCAAAAATGCCGAATCCCGTCTCAACCATCACTTGTGAGGACTCTTTGGAGTAAGTTC  
CTTGGCTTGGACAGGACATTTAGTTCAT

*Triticum*

CTGATCCTGCTACGAAGAAAGATGCTCATTTTCTTAAAATATCCCATATATGTAGGGGGAAACCGAGGAAGAGGACAGATC  
TATCCTGATGGTAGCAAGAGTAACAATACAGTCTATAATGCTACGTCAACAGGTATAGTAAGAAAAATACTACGTAAAGA  
A---

AAAGGGGGGTATGAAATATCCATAGTTGATGCATCAGATGGACGCCAAGTGATTGATATTATACCTCCCGGACCAGA  
TCTTGTTCAGAGGGGGAATCCATCAAGCTTGTATCAACCATTAACAAGCAATCCTAATGTGGGAGGTTTTGGT  
ACGCAGAAATCGTGCTTCCAGGATCCATTACGTGTTCAAGGCCTTTTGAACGTCCTCGAATCCGTTATTTTGGCACAAGTT  
TTT-TGGTTCTCATC--AACGAAACAGTTTGAAGGTTCAATTGTACGAAATG---AATTTCT---

ATGAGTAAAGTATATGATTGGTTTTGAGGAACGTCTTGGATTGAGGCAATTGCAGATGATATAACTAGTAAATATGTTCC  
TCCCATGTCAACATATTTTATTGTTTGGGGGAATTACACTTACTTGTCTTAGTACAAGTCGCTACCGGTTTTGCTA  
TGACTTTTTACTACCGACCAACCGTTACAGAGGCTTTTTCTCGGTTCAATACATAATGACCGAGGCCAATTTGGTTGG  
TTAATCCGATCCGTTTCATCGATGGTCAGCAAGTATGATGGTTTTAATGATGATCCTGCATGTATTTCTGTGTATCTCAC  
AGGGGGATTTAAAAAACCCCGTGAATTAACATTGGGTACAGGTGTGGTTTTGGCTGTTTTGACTGCATCATTTGGTGTAA  
CTGGTTATTTCTTTGCCTTGGGATCAAATTTGGCTATTGGGCGACTCAAATTTGTGACAGGTGTACCTGACGCCATTTCCGGTA  
ATAGGATCGCCTTTAGTGGAGTTATTACGCGGAAGTGTAGTGTGGGCAATCCACTTTGACTCGTTTTTATAGTTTACA  
TACCTTTGTACTGCCTCTGCTTACTGCCGATTTTATGTTAATGCACTTTCCAATGATACGTAAGCAAGGTATTTCCGGTCT  
CTTTA---

ATGGGAGTAACAAAGAAACCGACTTAAATGATCCTGTATTAAGAGCTAAATAGCTAAAGGGATGGGACATAATTATTA  
CGGGGAACCCGCATGGCCCAACGATCTTTTATATATTTTTCCAGTAGTAATTCTAGGTACTATTGCATGTAATGTAGGTT  
TAGCGGTTCTCGAGCCATCAATGATTGGTGAACCGGCAGATCCGTTTTGCAACTCCTCTGGAAATATTACCCGAGTGGTAC  
TTCTTTCCCGTGTTCAAATACTCCGTACAGTACCCAATAAGTTATTGGGCGTTCTCTTAATGGTTTTCTGTGCCAACAGG  
CTTATTGACAGTACCTTTTTCTAGAGAATGTCAATAAATTTCAAATCCATTTCCGCGCCAGTAGCTACGACCGTTTTTT  
TAATCGGTACTGTAGTAGCTCTTTGGTTAGGTATTGGAGCAACATTACCCATTGATAAATCATTAACTTTAGGTCTTTTT

-----

ATGATTGAAGTTTTTCTATTTGGAATCGTCTTAGGCCTAATTCCTATTACTTTAGCGGGATTATTTCGTGACTGCGTATTT  
GCAATACAGGCGTGGGGATCAGTTGGATCTT-----  
ATGCTTACTTTAACT-----  
AGTTATTTTTGGTTTTCTACTGGCTGCTTTAACTATAACCCCAGCTCTATTTATTGGCTTGAACAAGATA-----  
CGCCTTATT-----  
-----

ATGGATATAGTAAGTCTCGCTTGGGCTGCTTTAATGGTAGTCTTTACATTTTCTCTTTCACTAGTAGTATGGGGAAGGAG  
TGGACTC---ATGATTATTCGTTTCGCCGGAACCA-----GAAGTAAAA-----  
ATTGTTGTGGATAGGGATCCTGTAAAAACATCTTTTGAGGAATGGGCCAGACCCGGCCATTTCTCAAGAACACTAGCTAA  
GGGCCCTGATACTACCCTTGGATCTGGAACCTACATGCTGATGCTCACGATTTTCGATAGTCACTACTGGTATTTGGAGG  
AGATTTCTCGAAAAGTCTTTAGTGTCTATTTTCGGGCAACTTTCCATTATCTTTCTTTGGTTGAGTGGCAGTACTTTTCA  
GGCCTCCGTTTTTTTCCAATTATGAAGCATGGCTAAGTATCTACTCACATTTGGACCCAGTGTCTCAGGTAGTTTGGCCTAT  
AGTAGGGCAAGAAATATTGAATGGTGTAGTAGGCGGGGTTTTCCGAGGAATCCAAATAACCTCTGGTTTTTTTTTCAGCTTT  
GGCGAGCATCTGGAATAACTAGTGAATTACAACCTCTATTGTAAGTGCATTGATTTTTGCAGCGTTAATGCTT  
TTTGCTGGTTGGTTCCATTATCACAAAGCCGCTCCCAAATTGGCCTGGTTCCAAGATGTAGAATCCATGTTGAATCACCA  
CTTAGCGGGATTATTAGGACTTGGGTCTCTTTCTTGGGCGGGGCACCAAATTCATGTATCTTTACCAATTAACCAATTTT  
TTGACGCTGGGGTGGATCCTAAAGAGATAACACTTCTCATGAATTTATCTTGAATCGGGACCTTTTGGCTCAACTTTTAT  
CCTAGTTTTTGCAGGAGCAACCCCTTTTTTCACTTTAAATTTGGTCCAAATACGCAGAATTTCTGACTTTTTCGCGGAGG  
ACTAGATCCAGTAACCGGTGGTCTCTGGCTGACCGATATTGCGCACCATCATTAGCTATTGCTATTCTTTTCTTAATCG  
CAGGTCATATGTATAGGACCAATTGGGGTATTGGCCATGGACTTAAAGATATTTTGGAGGCTCACAAGGGCCCATTTACA  
GGACAAGGCCATAAGGGTCTTTATGAAATCTTAAACAACGTCATGGCATGCTCAATTATCTCTTAACTAGCTATGCTAGG  
CTCTACAACCATTGTTGTAGCTCATCATATGATTCTATGCCTCCCTATCCATACCTAGCTACTGACTATGGTACACAAC  
TTTTCTTGTTCACACACCACATGTGGATTGGCGGATTTCTAATAGTCCGGTGTCTGCTGCACATGCAGCAATTTTTATGGTA  
AGAGACTATGATCCAACCTACTCGATAACAACGATCTATTAGATCGCGTCTTAGACACCCGCGATGCAATCATATCCCACCT  
TAACTGGGTATGTATATTTCTAGGTTTTTACAGTTTTTGGCTTGTACATTATAATGATACCATGAGTGTCTTAGGCCGCTC  
CACAAGATATGTTTTCGGATACTGCCATAACAATTACAACCT---

ATCTTTGCTCAATGGGTACAAAATATCCATGCTACTGCGCCTGGCGTAACAGCTCCTGGTGCAACAACAAGTACTAGCTT  
AACGTGGGGAGCCGCGAGTTAGTAGCAGTAGGTGGCAAAGTGGCTTTGTTACCTATTCCATTAGGAACCCGAGATTTTT  
TAGTCCATCACATTCATGCAATTTACCATACTAGTGTACTGATTAATACTTTTGAAGGTGTTTTATTTGCTCGGAGTTCC  
CGTTTTGATACCCGATAAAGCAAATCTAGGTTTTTTCGCTTTCTTGCATGGCCCTGGCCGAGGGGGAACATGTCAAGTATC  
CGCCTGGGATCATGTTTTCTTAGGTTTTATTCTGGATGTACAATGCAATTTCCGTAGTCAATTTCCATTTTCAAGTTGAAAA  
TGCAGTCCGATGTTTTGGGGTACTATAAGTGTCAAGGGGTGGTAACCTCATATTACAGGGGGAACTTTGCACAGAGTTCC  
ATTACGATTAATGGGTGGCTTCGAGATTTCTTGTGGGCACAGGCATCGCAAGTCATTCAGTCTTATGGTTCTTCAATTATC  
TGCATATGGTCTTTTTTTCTTAGGTGCTCATTTTGTCTGGGCCTTCAGTTTAATGTTTTTTATTC---

AGCGGCCGTGGTTATTGGCAAGAACTCATTGAATCTATCGTTTTGGGCTCATAACAAATTAAGGTTGCTCCTGCTACTCA  
GCCTAGAGCCTTGAGCATTATAACAAGGACGCGCTGTAGGAGTAACCCATTACCTTCTGGGTGGAATTGCCACGACATGGG  
CATTCTTCTTAGCGAGAATTATTGCAGTAGGA---

ATGGAATTAAGATTTCCAGGTTTAGCCAAGGCTTAGCTCAGGACCCCACTACTCGTCGTATTTGGTTTTGGTATTGCTAC  
CGCACATGATTTTCAAAGTTCATGATGATATTACTGAAGAACGTCTTTATCAGAACATTTTTGCTTCTCACTTTGGGCAAT  
TAGCAATAATCTTTCTATGGACGTCCGAAATCTGTTTCATGTAGCTTGGCAAGGAAATTTTGAATCATGGATACAGGAT  
CCTTTACACGTAAGACCTATTGCTCATGCGATTTGGGATCCTCATTTTGGTCAACCCGCTGTGGAAGCCTTTACTCGAGG  
AGGTGCTGCTGGTCCAGTGAATATTGCTTATTCTGGAGTTTATCAGTGGTGGTATACAATAGGATTACGCACCAATGAGG  
ATCTTTATACTGGAGCTCTTTTTCTATTATTTCTTTCTACGCTGTCTTAATAGCGGGTTGGTTACATCTACAACCCAAA  
TGGAACCAAGCCTTTCTGGTTTCAAAAACGCGGAATCTCGTCTCAATCATCATTGTGTCAGGACTTTTTCGGGGTAAGTTC  
TTTGGCTTGGACAGGACATTTAGTTTCAT

Typha

CCGACCCTGCTACGAAGAAAGACGTTTCACTTCTTAAAATATCCCATATATGTAGGTGGGAACCGAGGAAGGGGTGAGATT  
TATCCTGATGGTAGCAAGAGTAACAATACAGTCTATAATGCTACATCAGCAGGTATAGTAAGCAAAATAGTACGTAAAGA  
A---

AAGGGGGGATATGAAATATCCATAGTTGATGCATCGGATGGACGTCAAGTGGTTGATATTATACCTCGAGGGCCAGA  
TCTTGTTCGAGGGTGAATCCATCAAGCTTGTATCAACCATTAACAAGCAATCCTAATGTAGGAGGGTTTGGTTCAGGGAG  
ATGCAGAAATAGTGTTCAGATCCATTACGCGTTCAAGGCCTTTTGTCTTCTTTCGCATCTGTTATTTTGGCACAAGTT  
TTCTTGGTTCTT---AAAAAGAAACAGTTTGAAGGTTCAATTGTACGAAATG---AATTTT-----  
AAAGTATATGATTGGTTTTGAGGAACGTCTCGAGATTGAGGCGATTGCAGATGATATAACTAGTAAATATGTTTCTCTCA  
TGTCAACATATTTTATTGTTTTAGGGGGATCACACTTACTTGTCTTCTAGTACAAGTAGCTACAGGTTTTGCTATGACTT  
TTTACTATCGTCCAACCGTTACAGAGGCTTTTTCTCTGTTCAATACATAATGACTGAGGCCAACTTTGGTTGGTTAATC  
CGATCAGTTCATCGATGGTCAGCAAGTATGATGGTTCTAATGATGATATTGCACGATTTTCGTGTGTATCTCACAGGTGG

ATTTAAAAAACCCCGGAATTAACCTGGGTTACAGGTGTAGTTTTGGCTGTATTGACTGCATCTTTTGGTGTAACCTGGTT  
ATTCCTTACCTCGGGACCAAATTGGTTATTGGGCAGTAAAAATCGTGACAGGCGTACCTGAAGCTATTCCTGTAATAGGA  
TCGCCTTTAGTAGAGTTATTACGCGGAAGTGCTAGTGTGGGCCAATCCACTTTGACTCGTTTTTATAGTTTTACACACTTT  
TGTATTGCCTCTTCTTACTGCCGTATTTATGTTAATGCACCTTCCAATGATACGTAAGCAAGGTATTTTCAGGTCCTTTA-

-----  
AACAAAGAAACCTGATTTGAACGATCCTGTATTAAGAGCAAAATTGGCTAAAGGGATGGGACATAATTATTATGGAGAAC  
CCGCGTGGCCCAATGATCTTTTGTATATTTTTCCAGTAGTAATTCTAGGTACTATTGCATGTAATGTCGGTTTTAGCGGTT  
CTAGAACCGTCAATGATTGGTGAACCGGCGGATCCATTTGCAACTCCTTTGGAAATATTACCCGAATGGTACTTCTTTCC  
CGTATTTCAAATACTTCGCACAGTGCCCAATAAGTTATTGGGCGTTCTTTTAAATGGTTTTAGTACCAACGGGATTATTGA  
CAGTACCCTTTTTGGAGAATGTCAATAAAATCCAAAATCCATTTCCGCGTCCAGTAGCTACAACAGTTTTTTTTGATTGGT  
ACCGCAGTAGCTCTTTGGTTAGGTATTGGAGCAACATTACCTATTGATAAAATCCCTAACTTTAGGTCTTTTT-----

-----  
ATGATTGAAGTTTTTCTATTTGGAATCGTCTTAGGTCTAATTCCTATTACTTTAGCAGGATTATTCGTGACTGCCTATTT  
ACAATACAGACGTGGTGATCAATTGGACCTT-----  
ATGCTTACTATAACT-----  
AGTTATTTTCGGTTTTTCTACTGGCTGCTTTAACTATAACCCTAGCTCTATTTATTGGTTTTGAACAAGATA-----  
CGACTTATT-----

-----  
ATGGATATAGTAAGTCTCGCTTGGGCTGCTTTAATGGTAGTCTTTACATTTTCTCTTTCACTCGTAGTATGGGGAAGGAG  
TGGACTC---ATGATTATTCGTTTCGCCGGAACCA-----GAAGTGAAA-----  
ATTGTTGTGGATAGGGATCCTGTAAAAACATCTTTTCGAGCAATGGGCCAAACCCGGTCAATTTCTCAAGAACAATAGCTAA  
GGGCCCTGATACTACCCTTGGATCTGGAACCTACATGCTGATGCTCACGATTTTCGATAGTCATACCAGTGATTTAGAGG  
AGATTTCTCGAAAAGTATTTAGTGCTCATTTCGGTCAACTCTCCATTATCTTTCTTTGGCTGAGTGGCATGTACTTCCAT  
GGTGCTCGTTTTTCCAATTATGAAGCATGGCTAAGTGATCCTACTCACATTGGACCTAGTGCTCAGGTAGTTTTGGCCAAT  
AGTAGGTCAAGAAATATTGAACGGTGATGTGGGCGGGGGTTCCGAGGAATACAAATAACCTCCGGTTTTTTTTAGCTTT  
GGCGAGCATCTGGCATAACTAGTGAATTACAACCTTTATTGTACTGCAATTGGTGCATTGGTCTTTGCATCGTTAATGCTT  
TTTGCCGGTTGGTTTTATTATCACAAAGCTGCCCCAAAATGGCTTGGTTCCAAGATGTCGAATCTATGTTGAATCACCA  
CTTAGCGGGGTTATTAGGACTTGGGTCTCTTTCTTGGGCAGGACCAAAATCCATGTATCTTTACCGATTAACCAATTTTC  
TCGACGCTGGAGTTGATCCTAAAGAGATACCACTTCTCATGAATTTATCTTGAATCGGGACCTTTTGGCTCAACTTTAT  
CCCAGTTTTGCGAGGGAGCAACCCCTTTTTACCTTGAATTGGTCAAATACGCGGAATTTCTGACTTTTTCGTGGAGG  
ATTAGATCCAATAACAGGGGTCTATGGTTGAGTGATATTGCACACCATCATTAGCTATTGCTATTCTTTTCTGATCG  
CTGGTCATATGTATAGGACCAACTGGGGCATTGGTCATGGACTTAAAGATATTTTAGAGGCTCATAAAGGGCCATTTACA  
GGTCAGGGTCATAAGGGTCTCTATGAAATCCTAACAACGTCATGGCATGCTCAATTATCCCTTAACCTGGCTATGTTAGG  
CTCTTTAACCATTGTTGTAGCTCATCATATGTATTCTATGCCCCCTATCCATACCTAGCTACTGACTACGGTACACAAC  
TTTTCGTTGTTACACATCACATGTGGATTGGTGGATTTCTCATAGTTGGTGCTGCTGCACATGCAGCCATTTTTATGGTA  
AGAGACTACGATCCAACCTACTCGATAACAACGATCTATTAGATCGTGTCTTAGGCATCGTGATGCAATCATATCACATCT  
TAAGTGGGTATGTATATTTCTAGGTTTTACAGTTTTGGCTTGTATATTCATAATGATACCATGAGTGCTTTAGGACGTC  
CCCAAGATATGTTTTAGATACCGCTATAACAATTACAACC---

ATCTTTGCTCAATGGGTACAAAATACCCATGCTTTAGCACCTGGCGTAACAGCTCCTGGTGCAACAACAAGTACCAGCTT  
AACTTGGGGAGGTGGTGAGTTAGTAGCAGTAGGCGGCAAAGTAGCTTTGTTACCTATTCCATTAGGAACCGCAGATTTCT  
TAGTCCATCACATTCATGCATTTACGATCCATGTGACTGTATTGATACTACTGAAAGGTGTTCTATTTGCTCGCAGTTCC  
CGTCTGATACCTGATAAAGCAAATCTTGGTTTTCGTTTTCCCTTGTGATGGGCCCGGACGAGGGGGGACATGTCAAGTCTC  
TGCCTGGGATCATGTCTTCTTAGGTCTATTCTGGATGTACAATGCAATTTCCGGTAGTAATTTTCCATTTTCAGTTGGAAAA  
TGCAGTCCGATGTTTTGGGGTACTATAAGCGATCAAGGGGTGGTAACTCATATCACAGGAGGAACTTTGCACAAAGTTCC  
ATTACTATTAATGGATGGCTCCGAGATTTCTTATGGGCACAGGCATCTCAGGTAATTCAGTCTTATGGCTCTTCATTATC  
GGCATAATGGTCTGTTTTCTTAGGTGCTCATTGTTGCTGGGCTTTTCAGTTAATGTTTTCTATTC---

AGTGGCCGTGGTTATTGGCAAGAACCTATTGAATCTATCGTTTTGGGCTCATAACAATTAAGTTGCTCCTGCTACTCA  
GCCTAGAGCCTTGAGCATTGTACAAGGACGTGCTGTAGGAGTAACCCATTACCTTCTGGGTGGAATGCCACAACATGGG  
CATTCTTCTTAGCAAGAATTATTGCAGTAGGA---

ATGGCATTAAAGATTTCCGAGGTTTAGCCAAGGCTTAGCTCAGGACCCACTACTCGTCTGATTTGGTTTTGGTATTGCTAC  
CGCACATGACTTTGAGAGTCATGATGATATTACTGAGGAACGCTCTTTATCAGAACATTTTTGCTTCTCACTTTGGGCAGT  
TAGCAATAATTTTTCTGTGGACGTCTGGAAATCTGTTTCATGTAGCTTGGCAAGGAAATTTTGGTCAATGGATAACAGGAT  
CCTTTACATGTAAGACCTATTGCTCATGCAATTTGGGATCCTCATTGTTGGTCAACCAGCTGTAGAAGCCTTTACTCGAGG  
AGGTGCTACCGGCCAGTGAATATCGCTTATTCGGTGTATTCAGTGGTGGTATAACAATCGGATTACGCACCAATGAAG  
ATCTTTTACTGGAGCTCTTTTTCTATTTCTTTCCGCTATATCCTTAATAGCGGGTTGGTTACACTTACAACCCAAA  
TGGAACCAAGCGTTTTCGTGGTTCAAAAATGCCGAATCTCGTCTCAATCATCATTGTCAGGACTTTTTGGAGTAAGTTC  
CTTAGCTTGGACAGGACATTTAGTCCAT

Vitis

CCGACCCCGCTACTAAGAAAGATGTTCACTTCTTAAAATATCCCATATACGTAGGCGGGAACAGGGGAAGGGGTGTCAGATT  
TATCCTGACGGGAGCAAGAGTAACAATACAGTTTATAATGCTACAGCGGCAGGTATAGTAAGCAAATCATACGAAAAGA  
A---  
AAAGGGGGGTACGAAATAACCATAGCGGATGCATCGGATGGACGTCAAGTGGTTGATATTATCCCTCCAGGACCAGA  
TCTTGTTCAGAGGGTGAATCTATTAACCTTGATCAACCATTAACGAGTAATCCTAATGTGGGTGGATTTGGTCAGGGGAG  
ATGCAGAAATAGTACTTCAAGATCCATTACGTATCCAAGGCCTTTTGTCTTCTTGTCTTCTGTTATTTGGCACAAATC  
TTTTTGGTTCTT---AAAAAGAAACAGTTTGAGAAGGTTCAATTGTCCGAAATG---AATTC---  
ATGAGTAAAGTCTATGATTGGTTCGAAGAACGTCTCGAGATTACAGGCGATTGCAGATGATATAACTAGTAAATATGTTCC  
TCCTCATGTCAACATATTTTATTGTCTAGGAGGAATTACGCTTACTTGTTTTTTAGTACAAGTAGCTACGGGTTTGCTA  
TGACTTTTTACTATCGTCCGACGGTTACTGAGGCTTTTGGCTTCTGTTCAATACATAATGACTGAAGCGAECTTCGGTTGG  
TTAATCCGATCAGTTTATCGATGGTCCGCAAGTATGATGGTCTAATGATGATCCTTCACGTATTTTCGTGTATATCTCAC  
CGGTGGATTTAAAAAACCTCGCGAATTGACTTGGGTTACAGGTGTGGTTCTGGGTGTATTGACCGCATCTTTTGGTGTA  
CTGGTTATTCTTTACCTCGGGACCAAATTGGTTATTGGGCAGTCAAATTTGTAACAGGTGTACCTGAAGCTATTCTGT  
ATAGGATCACCTTTGGTAGAGTTATTACGCGGAAGTGCTAGTGTGGGACAATCCACTTTGACCCGTTTTTATAGTTTACA  
CACTTTTGTATTACCTCTTCTTACGGCCGTATTTATGTTAATGCACCTCCCAATGATACGTAAGCAAGGTATTTCTGGTC  
CTTTA---  
ATGGGAGTAACAAAAAACCTGACTTGAACGATCCTGTATTAAGAGCTAAATTAGCTAAAGGGATGGGTGATAATTATTA  
CGGAGAACCCCGCATGGCCCAATGATCTTTTATATATCTTTCCAGTAGTTATTCTAGGTACTATTGCATGTAACGTAGGCT  
TAGCGGTTCTAGAACCATCAATGATTGGTGAACCAGCAGATCCATTTGCAACTCCTTTGGAAATATTACCTGAATGGTAT  
TTCTTTCCCGTATTTCAAATACTTTCGTACAGTACCTAATAAGTTATTAGGTGTTCTTTTAATGGTTTCAGTACCTGCGGG  
ATTATTAACAGTACCTTTTTTGGAAAATGTTAATAAATTCAAAATCCATTTTCGTCGTCCAGTAGCGACAACCGTTTTTT  
TGATTGGTACCGCAGTGGCCCTTTGGTTGGGTATTGGAGCAACATTACCTATTGATAAATCCCTAACTTTAGGTCTTTTT  
-----  
ATGATTGAAGTTTTTCTATTTGGAATCGTCTTAGGTCTAATTCCTATTACTTTGGCTGGATTATTCGTAACCTGCATATTT  
ACAATACAGACGTGGTGATCAGTTGGACCTT-----  
ATGCCTACTATAACT-----  
AGTTATTTTCGGTTTTCTACTAGCGGCTTCAACTATAACCTCAGTCCTATTTATTGGTCTAAGCAAGATA-----  
CGACTTATT-----  
-----  
ATGGATATAGTAAGTCTCGCTTGGGCTGCTTTAATGGTAGTCTTTACATTTTCTCTTTCACTCGTAGTATGGGGAAGAAG  
TGGACTC---ATGATTATTCGTTCCGCCGAACCA-----GAAGTTAAA-----  
ATTTTGGTAGATAGGGATCCCATAAAAACCTTCTTTTCGAGGAATGGGCCAGACCCGGTCATTTCTCAAGAACAATAGCTAA  
GGGCCCTGATACTACCCTTGGATCTGGAACCTACATGCTGATGCTCACGATTTTCGATAGCCATAACCAGTGATTTGGAGG  
AGATCTCTCGAAAAGTATTTAGTGCCCATTTTCGGGCAACTCTCCATCATCTTTCTTTGGCTGAGTGGCATGTATTTCCAC  
GGTGCTCGTTTTTCCAATTATGAAGCATGGCTAAGCGATCCTACTCACATTGGACCTAGTGCCAGGTGGTTTTGGCCAA  
AGTGGGCCAAGAAATATTGAATGGTGTATGTGGGCGGGGTTTCCGAGGAATACAAATAACCTCTGGTTTTTTTCAGATGT  
GGCGAGCATCTGGAATAACTAATGAATTACAACCTTTATTGTACCGCAATTGGTGCATTGGTCTTTGCAGCCTTAATGCTT  
TTTGCTGGTTGGTTCCATTATCACAAGCCGCTCCAAAATTGGCTTGGTTCCAAGATGTAGAATCTATGTTGAATCACCA  
TTTAGCGGGGCTACTAGGACTTGGGTCTCTTTCTTGGGCGGGGCATCAAGTACATGTATCTTTACCGATTAACCAATTT  
TAAACGCTGGAGTAGATCCTAAAGAGATCCCCTTCTCATGAATTTATCTTGAATCGGGATCTTTTGGCTCAACTTTAT  
CCCAGTTTTGCCGAGGGAGCAACCCATTTTTACCTTGAATTGGTCAAATATGCAGAATTTCTTACTTTTTCGTGGAGG  
ATTAGATCCAGTAACTGGGGGTCTATGGCTGACCGATATTGCACACCATCATTTAGCTATTGCAATTTCTTTTCTGATAG  
CGGGTCACATGTATAGGACCAACTGGGGCATTGGTCATGGGCTAAAAGATATTTTAGAGGCTCATAAAGGTCCATTTACA  
GGTCAGGGCCATAAAGGCCTATATGAAATCTAACAACGTATGGCATGCTCAATTATCTCTTAACCTAGCTATGTTAGG  
CTCTTTAACCATTGTTGTAGCTCACCATATGTATTCATGCCCTTATCCATATTTAGCTACTGACTATGGTACACAAC  
TGTCAATGTTTACACATCACATGTGGATTGGTGGATTTCTCATAGTTGGTGTCTGCTGCGCATGCAGCCATTTTTTATGGTA  
AGAGACTATGATCCAACCTACTCGATAACAACGATCTATTAGATCGTGTCTTAGGCATCGTGATGCAATCATATCACATCT  
CAACTGGGCATGTATATTTCTAGGCTTTACAGTTTTGGTTTTGTATATTCATAATGATACCATGAGCGCTTTAGGGCGTC  
CCCAAGATATGTTTTAGATACTGCTATAACAATTACAACCC---  
GTCTTTGCTCAATGGATACAAAACACCCATGCCCTAGCACCTAGTGCAACGGCTCCTGGTGCAACAACAAGCACCAGTTT  
GACTTGGGGGGGTGGTGATTTAGTAGCAGTGGGTGGCAAAGTAGCTTTGTTGCCTATTCCGTTAGGAACCGCAGATTTTT  
TGGTACATCACATTCATGCATTTACGATTCATGTGACGGTATTGATACTCCTGAAAGGTGTTCTATTTGCTCGTAGCTCT  
CGTTTTGATACCGGATAAAGCAAACCTTGGTTTTCGTTTTCCCATGTGATGGACCTGGAAGAGGGGTACATGTCAAGTATC  
AGCTTGGGATCACGTCTTCTTAGGGCTATTCTGGATGTATAATTCAATTTCCGTAGTAATATTCCATTTTCAGTTGGAAAA  
TGCAGTCAGATGTTTTGGGGGAGTATAAGTGATCAAGGGGTGTTAACTCATATCACGGGAGGAACTTTGCGCAAAGTTCC  
ATTACTATTAATGGGTGGCTCCGCGATTTCTTATGGGCACAGGCATCCCAGGTAATTCAGTCTTATGGTTCTTCATTATC

CGCATATGGTCTTTTTTCTAGGTGCTCATTGTTGATGGGCTTTTAGTTTAAATGTTTCTATTT---  
AGCGGGCGTGGTTATTGGCAAGAAGTATTGAATCCATCGTTTTGGGCTCATAATAAATTTAAAGTTGCTCCTGCTACCCA  
GCCTAGAGCCTTGAGCATTGTACAAGGACGTGCTGTAGGAGTAACCCATTACCTTCTGGGTGGAATTGCCACAACATGGG  
CGTTCTTCTTAGCAAGAATTATTGCAGTAGGA---  
ATGGCATTAAAGATTTCCAAGGTTTAGCCAAGGCTTAGCTCAGGACCCCACTACTCGTTCGATTTGGTTTTGGTATTGCTAC  
CGCACATGACTTCGAAAGTCATGATGATATTACTGAGGAACGTCTTTATCAGAATATTTTTGCTTCTCATTGTTGGGCAAT  
TAGCAATCATTGTTCTGTGGACTTCCGGAAATCTGTTTCATGTAGCTTGGCAAGGAAATTTGAATCATGGGTACAAGAC  
CCTTTACATGTAAGACCTATTGCTCATGCAATTTGGGATCCTCATTTCGGTCAACCGGCTGTGGAAGCTTTTACTCGAGG  
GGGTGCTCCTGGACCAGTGAATATCGCTTATTCTGGTGTGTTATCAGTGGTGGTATAACAATCGGTTTACGCACTAATGAAG  
ATCTTTTACTGGAGCTCTTTTTCTATTATTTCTTTCTGCTATATCTTTAATAGCGGGTTGGTTACACCTACAACCGAAA  
TGAAACCGAGCGTTTTCTGGTTCAAAAATGCCGAATCTCGTCTCAATCATCATTGTCAGGACTCTTCGGAGTAAGTTC  
ATTGGCTTGGACCGGACATTTAGTCCAT

Yucca

CCGACCCTGCTACGAAGAAAGATGTTCACTTCTTAAAATATCCCATATATGTAGGAGGGAACCGGGGAAGGGGTCAGATT  
TATCCTGATGGGAGCAAGAGTAACAATACGGTCTATAATGCTACATCCGCAGGTATAGTAAGCAGAATAGTACGTAAAGA  
A---

AAAGGAGGATATGAAATAACCATAGTTGATGCATCGGATGGACACCAAGTGGTTGATATTATACCTCCAGGACCAGAAGT  
TCTTGTGTTTCCAGAGGGTGAATCCATCAAGCTTGTATCAACCATTAACAAGCAATCCTAATGTAGGGGGGTTGGTCAGGGAG  
ATGCAGAAATAGTGTCTCAAGATCCATTACGCGTCCAAGGCCTTTTGTCTTCTTGGCATCTGTTATTTTGGCACAAATT  
TTTTTGGTTCTT---AAAAAGAAACAGTTTGAAGGTTCAATTATTCGAAATG---AATTTCT-----  
AAAGTATATGATTGGTTCGAGGAACGTCTCGAGATTCAAGCGATTGCAGATGATATAACTAGTAAATATGTTTCTCCTCA  
TGTC AACATATTTTATTGCTAGGGGGGATCACACTTACTTGTGTTTTTAGTACAAGTAGCTACGGGTTTTGCTATGACTT  
TTTACTATCGCCCAACCGTTACGGAGGCTTTTTCTCTGTTCAATACATAATGATTGAGGCTAACTTCGGTTGGTTAATC  
CGATCAGTTCATCGATGGTCAGCAAGTATGATGGTTCTAATGATGATTCTGCACGTATTTTCGTGTGTATCTTACAGGCGG  
ATTTAAAAAACCCCGCAATTAACCTTGGGTTACAGGTGTGGTTCTGGCTGTATTGACTGCATCTTTTGGTGTAACTGGTT  
ATTCCTTACCTCGGGACCAATTTGGTTATTGGGCAGTAAAAATTGTGACAGGCGTACCTGAAGCTATTCCTGTAATAGGA  
TCGCCTTTGGTAGAGTTATTACGCGGAAGTGTAGTGTGGGCCAATCCACCTTGACCCGTTTTTATAGTTTACACACTTT  
TGTATTGCCTCTTCTTACTGCCGTATTTATGTTAATGCACCTCCCAATGATACGTAAGCAAGGTATTTCCGGTCTTTTA-

-----  
AACAAAGAAACCTGACTTGAATGATCCTGTATTAAGAGCTAAATTGGCTAAGGGGATGGGACATAATTATTATGGAGAAC  
CCGCATGGCCCAACGATCTTTTATATATTTTTCCGGTAGTAATTCTAGGTACTATTGCATGTAATGTAGGCTTAGCAGTT  
CTAGAACCATCAATGATTGGTGAACCTGCGGATCCATTTGCAACTCCTTTGGAAATATTACCCGAATGGTACTTCTTTCC  
CGTATTTCAAATACTCCGCACAGTACCCAATAAGTTATTGGGTGTTCTTTTAAATGGTTTTCAGTACCAACAGGATTATTGA  
TAGTACCCTTTTTGGAGAATGTTAATAAATTCAAAATCCATTTTCGTCTCCAGTAGCTACAACCGTCTTTTTGATCGGT  
ACCGCAGTAGCTCTTTGGTTAGGTATTGGAGCAACATTACCTATTGATAAATCTCTAACTTTAGGTCTTTTT-----

-----  
ATGATTGAAGTTTTTCTATTTGGAATCGTCTTAGGTCTAATTTCCATTACTTTAGCAGGATTATTTGTAAGTGCATATTT  
ACAATACAGACGCGGTGATCAGTTGGACCTT-----  
ATGCCTACTATAACT-----  
AGTTATTTCCGGTTTTCTATTGGCTGCTTCAACTATAACCCCGCTCTATTAATTGGTTTTGAACAAGATA-----  
CGACTTATT-----

-----  
ATGGATATAGTAAGTCTTGCTTGGGCTGCTTTAATGGTAGTCTTTACATTTTCCCTTTCACTTGTAGTATGGGGAAGGAG  
TGGACTC---ATGATTATTCGTTCCGCCGAACCC-----GAAGTGAAA-----  
ATTGTTGTGGATAGGGATCCTATAAAAACGTCTTTTCGAGGAATGGGCCAGACCCGGCCATTTCTCAAGAACAATAGCTAA  
GGGCCCTGATACTACCCTTGGATCTGGAACCTACATGCTGATGCTCACGATTTTCGATAGTCATACCAGCGATTTGGAGG  
AGATCTCTCGAAAAGTATTTAGTGTCTATTTTCGGTCAACTCTCCATTATCTTTCTTTGGCTGAGTGGCATGTACTTCCAT  
GGCGCCCGTTTTTCCAATTATGAAGCATGGCTAAGTATGCTACTACTCACATTAGACCCAGTGTCTCAAGTAGTTTGGCCAAT  
AGTAGGTCAAGAAATATTGAATGGCGATGTGGGCGGCGTTTTCCGAGGAATACAAATAACCTCCGGTTTTTTTTGAGATTT  
GGCGAGCATCTGGAATTACTAGTGAATTACAACCTCTATTGTACCGCAATTGGTGCATTGGTCTTTGCATTGTTAATGCTT  
TTTGCCGGTTGGTTCCATTATCACAAGCCGCCCAAAATTGGCTTGGTTCCAAGATGTAGAATCTATGTTGAATCACCA  
CTTAGCAGGGTTACTAGGACTTGGGTCTCTTTCTTGGGCGGGACACCAAAATACACGTATCCTTACCAATTAACCAATTTT  
TCGACGCTGGAGTTGATCCTAAAGAGATCCCCTTCTCATGAATTTATCTTGAATCGGGATCTTTTGGCTCAACTTTAT  
CCCAGTTTTGCCGAGGGAGCAACCCCTTTTTTACCTTGAATTGGTCAAAAATACGCGGATTTTTTGGATTTTTCGTGGAGG  
ATTAGATCCAATAACAGGAGGTCTATGGCTGACCGATATTGCTCATCATCATTAGCTATTGCAATTTCTTTCTTGTATCG  
CCGGTCATATGTATAGGACTAACTGGGGTATTGGTTCACGGCCTTAAAGATATTTTAGAGGCTCATAAAGGGCCATTTACA  
GGCCAGGGACATAAGGGCCTCTATGAAATCCTAACAACGTATGGCATGCTCAATTATCTCTTAATCTAGCTATGTTAGG

CTCTTCAACTATTGTTGTAGCTCACCATATGTATTCCATGCCCCCTATCCATACCTAGCTATTGACTATGGTACACAAC  
TTTTCGTTGTTTACACATCACATGTGGATCGGTGGGTTTCTCATAGTTGGTGCTGCTGCACATGCAGCCATTTTTATGGTA  
AGAGACTATGATCCAACACTCGATAACAACGATCTATTAGATCGTGTACTTAGGCACCGCGATGCAATTATATCACACCT  
TAAGTGGGCATGTATATTTCTAGGTTTTACAGTTTTGGTTTTGTATATTCATAATGATACCATGAGCGCTTTAGGACGTC  
CCCAAGATATGTTTTAGATACCGCTATAACAATTACAACCC---  
ATCTTTGCTCAATGGGTACAAAACACCCATGCTTTAGCACCTGGCGTAACAGCTCCTGGTGCAACAACAAGTACTAGCTT  
AACTTGGGGAGGTGGTGAAGTGTAGTAGCAGTAGGCGGCAAAGTGCCTTTGTTACCTATTCCATTAGGAACTGCAGATTTTT  
TGGTCCATCACATTCATGCATTTACGATCCATGTAAGTGTATTGATACTACTGAAAGGTGTTCTATTTGCTCGCAGTTCC  
CGTTTTGATACCCGATAAAGCAAATCTCGGTTTTCGTTTTCCCTTGTGATGGGCCTGGAAGAGGGGGGACATGTCAAGTATC  
TGCCTGGGATCATGTCTTCTTAGGTCTATTCTGGATGTACAATGCAATTTCCGGTAGTCATTTCCATTTTAGTTGGAAAA  
TGCAGTCGGATGTTTTGGGTACTATAAGCGATCAAGGGGTAGTAACTCATATCACAGGAGGAACTTTGCACAGAGTTCC  
ATTACTATTAATGGGTGGCTCCGGGATTTCTTATGGGCACAGGCATCTCAGGTAATTCAGTCTTATGGTTCTTCATTATC  
TGCATACGGTCTTTTTTTCTTAGGTGCTCATTTTTGTCTGGGCTTTTAGTTTTAATGTTTTCTATTCT---  
AGCGGCCGTGGTTATTGGCAAGAACTCATTGAATCCATCGTTTTGGGCTCATAACAAATTAAGGTTGCTCCTGCTACTCA  
GCCTAGAGCCTTGAGCATTGTACAAGGACGTGCTGTAGGAGTAACGCATTACCTTCTGGGTGGAATTGCCACAACATGGG  
CATTCTTCTTAGCAAGAATTATTGCAGTAGGA---  
ATGGCATTAAAGATTTCCAAGGTTTAGCCAAGGTTTAGCTCAGGACCCCACTACTCGTCGTATTTGGTTTTGGTATTGCTAC  
CGCGCATGACTTTGAGAGTCATGATGATATTACTGAGGAACGTCTTTATCAGAACATTTTTGCTTCTCACTTTGGGCAGT  
TAGCAATAATCTTTCTGTGGACGTCCGGAAATCTGTTTCATGTAGCTTGGCAAGGAAATTTGAGTCATGGATACAGGAC  
CCTTTACATGTAAGACCTATTGCTCATGCAATTTGGGATCCTCATTTTTGGTCAACCCGCTGTAGAAGCCTTTACTCGAGG  
AGGTGCTATCGGCCAGTGAATATCGCTTATTCCGGTGTATCAGTGGTGGTATAACAATCGGATTACGCACCAATGAAG  
ATCTTTATACTGGAGCTCTTTTTCTATTATTTCTTTCTGCTATATCCTTAATAGCGAGTTGGTTACACCTACAACCCAAA  
TGGAAACCGAGCGTTTTCGTGGTTCAAAAATGCCGAATCACGTCTCAATCATCATTTGTCAGGACTTTTTGGAGTAAGCTC  
CTTGGCTTGGACAGGACATTTAGTTTCAT

Zea

CCGATCCCGCTACAAAAAAGACGTTTCAATTTCTTAAAATATCCCATATATGTAGGGGGAAACCGAGGAAGGGGACAGATC  
TATCCTGACGGTAGCAAGAGTAACAATACGGTCTATAATGCTACGTCAACAGGTATAGTAAAAAAAATACTACGTAAAGA  
A---

AAGGGGGGATATGAAATATCCATAGTGGATGCATCGGATGGGCGCCAAGTGATTGATATTATACCTCCCGGGCCAGA  
ACTCTTTTTTTCAGAGGGGGAATCGATCAAGCTTGTATCAACCATTAACAAGCAATCCTAATGTAGGAGGGTTTTGGT  
CAGGGGGATGCAGAAATAGTGCTTCAGGATCCATTGCGCGTCCAAGGCCTTTTTGTTTTTCTTCGCATCTGTTATTTT  
GGCACAAGTTTTTTGGTTCTC---AAAAAGAAACAGTTTGAAGAGGTTCAATTGTACGAAATG---AATTTCT---

ATGAGTAAAGTATATGATTGGTTTTGAAGAAGCTTTGAGATTCAGGCAATTGCAGATGATATAACTAGTAAATATGTTCC  
TCCTCATGTCAACATATTTTATTGTTTTAGGGGGAATTACACTTACTTGTTTTTCTAGTACAAGTCGCTACCGGTTTTGCTA  
TGACTTTTTACTACCGACCGACCGTTACAGAGGCTTTTTCTCCGTTCAATATATAATGACGGAGGCCAACTTTGGTTGG  
TTAATCCGATCGGTTTCATCGATGGTCAGCAAGTATGATGGTTCTAATGATGATCCTGCACGTATTTTCGTGTGTATCTCAC  
AGGTGGATTTAAAAAACCCCGTGAATTAACCTGGGTACAGGCGTGGTTTTGGCTGTATTGACTGCATCATTTGGTGTAA  
CTGGTTATTCTTTGCCTTGGGATCAAATTTGGTTATTGGGCAGTCAAATTTGTTACAGGTGTACCCGAAGCTATTCCGGTA  
ATAGGGTCCCCTTTAGTGAATTATTACGTGGAAGTGTAGTGTGGGCCAATCCACTTTGACTCGTTTTTATAGTTTTACA  
TACCTTTGTACTACCTCTGCTTACTGCCGATTTATGTTAATGCACCTTTCCAATGATACGTAAGCAAGGTATTTCCGGTC  
CGTTA---

ATGGGAGTAACAAAGAAACCTGACTTAAATGATCCTGTATTAAGAGCAAAATAGCTAAAGGGATGGGACATAATTATTA  
TGGGGAACCCGCGTGGCCCAACGATCTTTTATACATTTTTCCAGTAGTAATTCTAGGTACTATTGCGTGTAAATGTAGGTT  
TAGCGGTTCTAGAGCCGTCAATGATTGGTGAACCGGCGGATCCGTTTGCACCTCTTTGGAAATATTACCCGAGTGGTAC  
TTCTTTCCCGTATTTCAAATACTCCGTACAGTACCCAATAAGTTATTGGGCGTTCTCTTAATGGTTTTCTGTGCCAACGGG  
CTTATTGACAGTACCCTTTCTAGAGAATGTCAATAAAATCCAAAATCCATTTGCTCGCCAGTAGCTACGACCGTTTTTT  
TAATCGGTAAGTGCAGTAGCTCTTTGGTTAGGTATTGGAGCAACATTACCCATTGATAAATCCTTAACTTTAGGTCTTTTT  
-----

ATGATTGAAGTTTTTTCTATTTGGAATCGTCTTAGGCCTAATTCCTATTACTTTAGCGGGATTATTCGTGACTGCGTATTT  
GCAATACAGGCGTGGGATCAGTTGGATCTT-----

ATGCTTACTATAACT-----

AGTTATTTTCGGTTTTTCTACTGGCTGCTTTAACTATAACCCAGCTCTATTTATTAGCTTGAACAAGATA-----

CGTCTTATT-----

ATGGATATAGTAAGTCTCACTTGGGCTGCTTTAATGGTAGTCTTTACATTTTCTCTTTTCGCTAGTAGTATGGGGGAGGAG  
TGGACTC---ATGATTATTCGTTTCGTCGGAACCA-----GAAGTTAAA-----

ATTGCTGTGGATAGGGATCCTATAAAAACATCTTTTGGAGGAATGGGCCAGACCCGGGCATTTCTCAAGAACAATAGCTAA

GGGCCCCGATACTACCACTTGGATCTGGAACCTACATGCTGATGCTCACGATTTTCGATAGTCATAACCGGTGATTTGGAGG  
AGATCTCCCCAAAAGTCTTTAGTGTCTATTTTCGGCCAACCTCTCCATTATCTTTCTTTGGTTGAGTGGCATGTACTTCCAC  
GGTGCCCGTTTTTCCAATTATGAAGCATGGCTAAGCGATCCTACTCACATTGGACCCAGTGTCTCAGGTAGTTTTGGCCAAT  
AGTAGGACAAGAAATTTTGAATGGTGTAGTAGGCGGGGGTTTTCCGAGGAATCCAAATAACCTCTGGTTTTTTTTTCAGATTT  
GGCGAGCATCCGGAATAACTAGTGAATTACAACCTCTATTGTACCGCAATTGGTGCATTGATTTTTGCATCGTTAATGCTT  
TTTGCCGGTTGGTTCCATTATCACAAAGCCGCTCCCAAATTTGGCCTGGTTCCAAGATGTAGAATCCATGTTGAATCACCA  
CTTAGCGGGATTATTAGGACTTGGGTCTCTTTCTTGGGCGGGACACCAAATCCATGTATCTTTACCGATTAACCAATTTTC  
TCGACGCTGGGGTTGATCCTAAAGAGATAACCACTTCCTCATGAATTTATCTTGAATCGCGACCTTTTGGCTCAACTTTAT  
CCTAGTTTTGCCGAAGGAGCAACCCCTTTTTTTCACCTTGAATTGGTCCAAATATGCGGAATTTCTTAGTTTTTCGCGGAGG  
ACTAGATCCAATAACCGGTGGTCTATGGTTGAGCGATATTGCACACCATCATTTAGCTATTGCTATTCTTTTCCTGATCG  
CTGGTCATATGTATAGGACCAATTGGGGTATTGGTCAATGGACTTAAAGATTTTTGGAGGCTCATAAGGGCCCAATTTACA  
GGACAAGGCCATAAAGGTCTCTATGAAATCCTAACACGTATGGCATGCTCAATTATCTTTAACCTAGCTATGTAGG  
CTCTACAACCTATTGTTGTAGCTCATCATATGTACTCTATGCCCCCTATCCATACCTAGCTACTGACTACGGTACACAAC  
TTTTCTTGTTCACACACCACATGTGGATTGGCGGATTTCTAATAGTTGGTGCTGCTGCACATGCAGCCATTTTTATGGTA  
AGAGACTATGATCCAACCTACTCGATAACAACGATCTATTAGATCGCGTCTTAGACACCGCGATGCAATCATATCCACCT  
TAACTGGGTATGTATATTTCTGGGTTTTTTCACAGTTTTTGGCTTGTACATTATAATGATACCATGAGTGTCTTAGGCCGTC  
CCCAAGATATGTTTTCGGATGCCGCCATAACAATTACAACCC---

ATCTTTGCTCAATGGATACAAAAATATCCATGCTGGCGCGCCTGGCGTAACAGCTCCTGGTGCAACAACAAGTACCAGCTT  
AACGTGGGGAGGCGGCGAGTTAGTAGCTATAGGCGGCAAAGTAGCTTTGTTACCTATTCCATTAGGAACCGCAGATTTTT  
TAGTCCATCACATTCACGCATTTACCATCCATGTGACTGTATTAATACTTTTGAAGGTGTTTTATTTGCTCGCAGTTCC  
CGTCTGATACCTGATAAAGCAAATCTTGGCTTTTCGCTTCCCTTGCAGCGGACCTGGGCGAGGGGGAACATGTCAAGTATC  
CGCCTGGGATCATGTTTTCTTAGGTCTATTCTGGATGTACAATTTATTTCCGTTAGTCAATTTCCATTTTCAGTTGGAAAA  
TGCAGTCGGATGTTTTGGGGTACTATAAGTGATCAAGGGATAGTAACCTCATATCACAGGGGGAAACTTTGCGCAGAGTTCC  
ATTACGATTAATGGTTGGCTTCGAGATTTCTTGTGGGCACAGGCATCCCAAGTAATTCAGTCTTATGGTTCTTCATTATC  
TGCATATGGTCTTTTTTTCTTAGGCGCTCATTTTGTCTGGGCTTTTCAGTTAATGTTTTTTATTC---

AGCGGCCGTTGGTTATTGGCAAGAACTCATTGAATCTATCGTTTTGGGCTCATAACAAATTTAAAGTTGCTCCTGCTACTCA  
GCCTAGAGCCTTGAGCATTATAACAAGGACGTGCTGTAGGAGTAACCCATTACCTTCTGGGTGGAATTGCCACAACATGGG  
CATTCTTCTTAGCGAGAATTATTGCAGTAGGA---

ATGGAATTAAGATTTCCAGGTTTTAGCCAAGGCTTAGCTCAGGACCCCACTACTCGTCGTATTTGGTTTTGGTATTGCTAC  
CGCACATGATTTTCCGAAAGTATGATGATATTACTGAGGAACGTCTTTATCAGAACATTTTTGCTTCTCACTTTGGGCAGT  
TAGCAATAATCTTTCTATGGACGTCCGGAATCTGTTTCATGTAGCTTGGCAAGGAAATTTTGAATCATGGATACAGGAT  
CCTTTACACGTAAGACCTATTGCTCATGCCATTTGGGATCCTCATTTTGGGCAACCCGCTGTGGAAGCCTTTACTCGAGG  
AGGTGCTGCCGGTCCAGTGAATATCGCTTATTCTGGGGTTTTATCAGTGGTGGTATAACAATTGGATTGCGCACCAATGAAG  
ATCTTTATACTGGAGCTCTTTTTCTATTATTTCTTTCTACGCTATCCTTAATAGGGGGTTGGTTACATCTACAACCCAAA  
TGGAAGCCAAGCCTTTTCGTGGTTCAAAAACGCCGAATCTCGTCTGAATCATCATTTGTCAGGACTTTTCGGAGTAAGTTC  
TTTGGCTTGGACAGGACATTTAGTTTCAT

Acorus GTCGCTATTCCCGCATCA---

AGGGGCGAGTATGTCAGATGGAATAATTTCTTAGATGTATTACCGCACCCCAAGGTTTTGGGACCACTTTTTAGCGGTCA  
GTGGAATCTTTATGCCAAAACCCCGATTCCAGTAGTCATTTATTTCGGTACCTCCAAGGAGCGGGAAGTCCATTCTAA  
CTCTTCTCGGGGGATTCCATCCGCAAACGCAAAGTTTTATGGCTGACCGATATGGCTCATCATCATTTAGCTATTGCATTT  
ATTTTCTGATAGCTGGTTCATATGTATAGAACCAACTTCGGGATTGGGCACAGTATAAAAAGATCTTTTAGAAGCACATAC  
TCCTCCGGGGGGTTCGATTGGGGCGTGGGCATAAGGGTCTTTATGATACAATCAATAATTCGCTTCATTTTCAATTAGGTC  
TTGCTCTGGCCTGTTTAGGAGTTATTACTTCCTTGGTAGCTCAACACATGTACTCTTTACCTGCTTACGCATTCATAGCG  
CAAGACTTTACTACTCAAGCTGCGTTGTATACTCATACCAATACATCGCAGGTTTCATCATGACGGGAGCCTTTGCTCA  
CGGAGCTATATTTCTTATTAGAGATTACAATCCGGAACAGAATGAAGATAATGTTATTGGCAAGAATGTTAGACCATAAAG  
AAGCTATCATATCTCATTTAAGTTGGGCCAGTCTGTTTTTGGGGTTCCATACCTTGGGACTTTATGTTTATAACGACGTC  
ATGCTCGTTTTTGGGACTCCGGA AAAACAAATCTTGATTGAACCTATATTTGCCAGTGGATACAATCCGCTCATGGTAA  
GACTTTATATGGGTTTTGATGTACTCTTATCTTCAACGAGTGGCCAGCATTCAATGCTGGTGAAGCATTGGTTACCCG  
GTTGGTTGAGTGTGTTAATGAGAATAGTAATTCACTATTCTTAAACAATAGGTCCTGGAGACTTCTTGGTTTCATCATGCT  
ATTGCTCTAGGTTTGCATAACAACCTACATTGATCTTAGTAAAGGGTGTCTTTAGATGCGCGTGGTTTCAAGTTAATGCCAGA  
TAAAAAAGATTTTCGGTTATAGTTTTCTTTCGCGACGGCCCGGGACGGGGGGTACTTGTGATATTTCTGCTTGGGATGCAT  
TTTTTTTGGCGGTTTTCTGGATGTTAAATACCATTGGATGGGTTACTTTTTTATTGGCATTGGAAGCACATCACATTATGG  
CAAGGTAATGTTTTACAATTTAACGAATCCTCTACTTATTTGATGGGATGGTTAAGAGATTATCTATGGTTAAACTCTTC  
CCAACCTATCAACGGATAACAATCCGTTTTGGTATGAATAGTTTATCGGTCTGGGCATGGATGTTCTTATTTGGACATCTTG  
TTTGGGCTACTGGATTTATGTTCTTAATTTCTTGGCGTGGATATTGGCAGGAATTAATTGAAACTTTAGCATGGGCTCAT  
GAACGCACACCTTTGGCTAATTTGATTTCGATGGAGAGATAAGCCAGTGGCTCTTTCCATCGTGCAAGCAAGATTGGTTGG

ATTAGCCCACTTTTCCGTAGGTTATATATTTCACTTATGCAGCTTTCTTGATTGCCTCTACATCAGGTAAATTTGGT---  
ATGTCACATTCAGTAAAGATTTATGATACATGTATAGGGTGTACTCAATGTGTACGAGCCTGTCTACAGATGTATTGGA  
AATGATACCCTGGGACGGATGTAAAGCTAAGCAAATTGCTTCTGCGCCAAGAACAGAGGACTGTGTAGGTTGTAAGAGAT  
GCGAATCCGCTGTCCAACAGACTTCTTGAGTGTCCGGGTTATTTAGGGAATGAGACAACCTCGCAGCATGGGTCTACCT  
TAT---ATGACAGATCTCAAC---  
TTACCCTCTATTTTTGTGCCTTTAGTAGGCCTAGTCTTTCCGGCAATTGCAATGGCTTCTTTATTTCTTCATGTTCAAAA  
AAACAAGATTGTC---ATGCAAGATATAAAAACATATCTCTCT---  
GTGGCACCTGTGCTAACTACTCTATGGTTTGGGTCTTTAGCAGGTTTATTGATAGAGATCAATCGTTTATTCCCGGATGC  
CTTGTCATTCCCATTTTTT-----  
ATGACTGCAATTTTAGAGAGACGCGAAAGTACAAGCCTATGGGGTCGCTTCTGTAAGTGGATAACCAGCACCAGAAACCG  
CCTTTACATTTGGATGGTTTCGGTGTTTAATGATCCCTACCTTATTGACCACAATTTCTGTATTTATTATCGCCTTCATCG  
CTGCTCCTCCAGTAGATATTGATGGTATCCGTGAACCTGTTTCCGGGTCTTTACTTTTATGGAAACAACATTATTTCTGGT  
GCCATTATTCTACATCTGCAGCTATAGGTTTGCACCTTTTACCCAATTTGGGAAGCAGCATCCGTTGATGAGTGGTTATA  
CAATGGTGGTCTTTATGAACATAATTGTTCTACACTTCTTACTTGGTGTAGCTTGTATATGGGTGCTGAGTGGGAACCTTA  
GTTTCCGTCTGGGTATGCGTCTTTGGATTGCTGTGCGCATATTAGCTCCTGTTGCAGCTGCTACTGCTGTTTTCTTGATC  
TACCCTATTGGTCAAGGAAGCTTCTCTGATGGTATGCCTCTAGGAATATCTGGTACTTTCAACTTTATGATTGTATTCCA  
GGCTGAACACAACATCCTTATGCATCCATTCCACATGTTAGGCGTAGCTGGTGTATTTCGGCGGCTCCCTATTTAGTGCTA  
TGCATGGTTCCTTGGTAACCTCTAGTTAATCAGGGAAACTACTGAAAATGAATCTGCTAATGAAGGTTACAGATTCCGT  
CAAGAGGAAGAACTTATAATATCGTCGCTGCTCACGGTTATTTTGGCCGATTAATCTTCCAATATGCTAGTTTCAACAA  
TTCCCCTTCCCTACATTTCTTCTTGGCTGCTTGGCCTGTAGTAGGTATCTGGTTCCTGCTTTAGGTATTAGTACTATGG  
CTTTCAACCTAAACGGTTTCAATTTCAACCAATCCGTAGTTGACAGTCAAGGTCGTGTTATTAACACTTGGGCTGATATC  
ATCAACCGTGTAACTTGGTATGGAAGTAATGCATGAACGTAATGCTCACAACTTCCCTCTAGACCTA---  
GCTTCTGTTGAAGCACCTTCTACAAATGGC---  
ATGGGTTTGCCTTGGTATCGTGTTCATACCGTTCGATTTGAATGATCCCGGTTCGGTTGCTTTCTGTCCACATAATGCATAC  
AGCTCTAGTTGCTGGTGGGCGGGTCAATGGCTCTATACGAATTAGCGGTTTTTGTATCCCTCTGACCCCGTTCTTGATC  
CAATGTGGAGACAAGGTATGTTTCGTTATACCCTTCATGACTCGTTTAGGAATAACCAATTCGTGGGGTGGTTGGAGTATC  
ACAGGAGGAAGTATAACGAATCCGGGTATTTGGAGTTACGAAGGTGTGGCAGGGGCACATATTGTGTTTTCTGGCTTGTG  
CTTTTTTAGCAGCTATTTGGCATTGGGTATATTGGGACTTAGAAAATATTTCTGTGATGAACGTACGGGAAAACCCCTTTGG  
ATTTGCCCAAGATCTTTGGAATTCATTTATTTCTCTCAGGAGTGGCTTGTCTTTGGCTTTGGCGCATTTTATGTAACAGGC  
TTGTATGGTCTTGAATATGGGTGTCTGATCCTTATGGACTAACCGGAAAAGTACAACCCGTAATCCAGCTTGGGGCGC  
GGAAGGTTTTGATCCTTTTGTTCGGGGCGAATAGCCTCTCATCATATTGCAGCGGGGACTTTGGGCATACTGGCAGGCC  
TATTCCACCTTAGTGTCCGTCCACCCAGCGTCTATACAAAGGATTACGTATGGGCAATATTGAAACTGTACTTTTCGAGT  
AGTATCGCTGCTGTGTTTTTTCAGCTTTTCGTAGTTGCGGAACTATGTGGTATGGTTCAGCAACTACCCCATCGAATT  
ATTTGGTCCGACGCGTTACCAGTGGGATCAAGGATACTTCCAGCAAGAAATATATCGAAGAGTTGGTGTGGACTAGCCG  
AAAATCTGAGTTTATCGGAAGCTTGGTCTAAAATTCCTGAAAAATTAGCTTTTTTATGATTACATCGGTAATAATCCGGCA  
AAAGGTGGATTATTTAGAGCAGGCTCAATGGACAACGGAGATGGAATAGCCGTTGGATGGTTAGGACACCCCGTCTTTTCG  
AGATAAGGAAGGGCGTGAACCTTTTTGTACGCCGTATGCCTACTTTTTTTGAAACATTTCCGGTAGTTTTGGTAGATGGAG  
ACGGAATTTGTGCGAGCCGATGTTCTTTTTCGAAGGGCAGAATCCAAATATAGTGTGCAACAAGTAGGCGTAACCTGTTGAG  
TTCTATGGTGGCGAACTCAATGGAGTCAGTTATAGCGATCCTGCTACTGTTAAAAAATATGCTAGACGTGCCCAATTAGG  
TGAAATTTTTGAATTAGATCGCGCTACTTTAAAATCCGATGGTGTTTTTTCGTAGCAGTCCGAGGGGTTGGTTCACTTTTG  
GACATGCTTCAATTTGCTTTACTCTTTTTTCGGGCACATTTGGCATGGAGCTAGAACCTTGTTCAGAGATGTTTTTGT  
GGTATTGATCCAGATTTGGATGCTCAAGTGAATTTGGGGCATTCCAAAAA---  
ATTGGAGATCCAACATAAGGCGACAAGCA-----  
ATGAAAACCTTATATCCCTGAGGAGGTTCTACCCCGTGGAAACGCTCTTTAATGGAACCTTAGCTTTAGCTGGTCTGTA  
CCAAGAAACCACTGGTTTTCGCTTGGTGGGCGGGGAATGCCAGACTTATCAATTTGTCCGGTAAACTACTCGGGGCTCACG  
TAGCCCATGCCGATTAATCGTATTCTGGCAGGAGCAATGAACCTCTTTGAAGTGGCTCATTTTCGTACCAGAGAAGCCC  
ATGATGAACAAGGATTAATTTACTTCCCATCTAGCTAC  
Amborella GTCGCTATTCCCGGATCC---  
AGGGGGGAATACGTGAGATGGAATAATTTCTAGACGTATTACCATCTCCTCAAGGCTTGGGGCCACTTTTTACAGGACA  
GTGGAATCTTTATGCCCAAACCCCGATTCCAGTGGTCATTTATTCGGTACCTCCCAAGGAGCGGGAACCTGCCATTCTAA  
CCCTTCTCGGGGATTCCATCCTCAAACCTCAAAGCTTATGGCTGACCGATATTGCTCATCATCATTTAGCTATTGCATTT  
GTTTTTCTCGTTGCTGGTCATATGTATAGAATAACTTCGGGATCGGTTCATAGTATAAAAAGATCTTTTAGAAGCACATAC  
TCCTCCGGGGGGTTCGATTGGGACGGGCACATAAAGGCTTTTATGACACAATCAATAATTCCATTCAATTTCAATTAGGTC  
TTGCTCTAGCCTCTTTGGGGGTTATTACTTCTTGGTAGCTCAACACATGTATTCTTTACCTCCTTATGCATTTCATAGCA  
CAAGACTTTACTACTCAAGCTGCGTTATATACTCATACCAATACATCGCAGGCTTCATCATGACAGGGGCTTTGCTCA  
TGGAGCTATATTTCTTATTAGAGATTACAATCCGGAACAGAACGAGGATAATGTATTGGCAAGAATGTTAGACCATAAAG  
AAGCTATAAAATCTCATTTAAGTTGGGCCAGCTTGTTCCTGGGTTCCATACTTTGGGACTCTATGTTTCATAACGACGTC



ATGCTTGCTTTTGGTACTCCAGAAAAACAAATCTTGATCGAACCTATATTTGCCCAATGGATAACAATCCGCTCATGGTAA  
GACTTCATATGGATTTGATGTACTCTTATCTTCAACGAACGGCCCAGCATTCAATGCTGGTTCGAAGCTTATGGTTACCTG  
GCTGGTTGAATGCTATTAATGAGAATGGTAATTCACTATTCCTAACAAATAGGTCCTGGAGACTTCTTGGTTTCATCATGCT  
ATTGCTCTAGGTTTGCATACAACCTACATTGATCTTAGTAAAAGGTGCTTTAGATGCACGTGGTTCCAAGTTCATGCCAGA  
TAAGAAAGATTTTGGTTATAGTTTCCCTTGGCATGGTCCAGGACGAGGCGGTACTTGTGATATTTCCGGCTTGGGATGCAT  
TTTATTTGGCGGTTTTCTGGATGTTAAATACCATTGGATGGGTTACTTTTTATTGGCATTGGAAGCATATCACTTTATGG  
CAGGGTAATCCCTTCACAATTAATGAATCTTCCACTTATTTGATGGGATGGTTAAGAGATTATCTATGGTTAAACTCTTC  
ACAACCTATCAATGGATATAACCCTTTCGGTACAAATAGTTTATCTGTCTGGGCGTGGATGTTCCCTATTTGGGCATCTGG  
TTTGGGCTACTGGATTTCATGTTTTTAATTTCCCTGGCGAGGATATTGGCAGGAATTGATTGAAACTCTAGCATGGGCTCAT  
GAACGCACACCTTTGGCTAATTTGATTTCGATGGAGGGATAAACCTGTGGCTCTTTCCATTGTTCAAGCAAGACTGGTTGG  
CTTAGCCACTTTTCTGTAGGTTATATATTTACTTATGCAGCTTTCTTAATTGCCTCTACATCGGGCAAATTTGGT---  
ATGTCACATTTCAGTAAAGATTTATGATACATGTATAGGGGTACACAAATGCGTACGAGCCTGCCCCAGGATGTATTGGA  
AATGATACCTTGGGACGGATGTAAGCTAAACAAATAGCTTCTGCTCCAAGAACAGAGGACTGTGTAGGTTGTAAGAGAT  
GTGAATCCGCTGTCCAACGGATTTCTTGAGTGTACGTGTTTATTTATGGCATGAGACCCTCGTAGCATGGGTCTAGCT  
TAT-----  
TTACCCTCTATTTTGTGCCTTTAATAGGCCTGTTCTTTCCGGCAATTGCAATGGCTTCTTTATTTCTTCATGTTCAAAA  
AAACAAGATTGTC---ATGCGAGATATAAAAAACATATCTCTCT---  
GTGGCGCCCGTGTAACTACTCTATGGTTCGGGGCTTTAGCAGGTCTATTGATAGAGATTAATCGTTTCTTCCCAGATGC  
GCTGGCATTCCCTTTTTT-----ATGACTGCT-----  
AGAGAGACGCGAAAGCACAAGCTTATGGGGGCGCTTCTGCAACTGGATAACCAGCACCAGAAACCGTCTTTACATTGGGT  
GGTTCCGGTGTTTTGGATGATCCCTACCTTATTGACCGCAACTTCTGTATTTATTATCGCCTTCATTGCGGCTCCTCCAGTA  
GATATTGATGGGATCCGTGAACCTGTTTCTGGTTCCTACTTTATGGAACAATATTCTTTCTGGTGCCATTATTCCAAC  
CTCTGCAGCTATAGGTTTGCATTTTTACCCAATATGGGAAGCGGCATCCGTTGATGAATGGTTATACAATGGTGGTCCTT  
ATGAGTTAATTGTCCTACACTTCTTACTTAGTGTAGCTTGTACATGGGTGCTGAGTGGGAACTTAGTTCCTGCTGGGT  
ATGCGCCCTTGGATTGCTGTTGCATATTCAGCTCCTGTTGCAGCTGCTACTGCTGTTTTCTTGATCTACCCTATTGGTCA  
AGGAAGTTTCTCAGATGGTATGCCTCTAGGAATATCTGGTATTTTCAACTTGATGATTGTATTCCAGGCGGAGCACAACA  
TCCTTATGCACCCATTTACATGTTAGGCGTAGCTGGTGTATTTCGGCGGCTCCCTATTCAGTGTATGCATGGTTCCTTG  
GTAACCTCTAGTTTGTACAGGAAACCCTGAAAATGAGTCTGCTAATGCAGGTTACAGATTCCGGTCAAGAGGAAGAAAC  
CTATAAATCGTAGCTGTCTATGTTATTTTGGTCGATTGATCTTCCAATATGCTAGTTTCAACAATTTCTCGTTCCTTAC  
ATTTCTTCTAGCTGCTTGGCCCGTAGTAGGTAATTTGGTTCAGTCTTTGGGTATTAGCACTATGGCTTTCAACCTAAAT  
GGTTTTCAATTTCAACCAATCCGTAGTTGACAGTCAAGGTCGTGTCAACACTTGGGCTGATATAATCAACCGTGCTAA  
CCTTGGTATGGAAGTTATGCATGAACGTAATGCTCACAATTTCCCTCTAGACTTA---  
GCTGCTGTTGAAGCTCCATCTACAAATGGA---  
ATGGGTTTGCCTTGGTATCGTGTTCATACCGTGTCTTGAATGATCCCGGTGCGTTGCTTTCTGTCCATATAATGCATAC  
AGCTCTAGTTTCTGGTTGGGCGGTTTCGATGGCTCTCTATGAATTAGCTGTTTTTGGATCCCTCTGATCCCATCTTGATC  
CAATGTGGAGACAAGGTATGTTTCGTTATACCCTTCATGACCCGTTTAGGAATAACAAATTCATGGGGCGGGTGGAGTATC  
ACAGGAGGAAGTGAACGAATCCGGGTATTTGGAGTTACGAAGGTGTGGCCGGGGCACATATTGTGTTTTCTGGTTTTGTG  
CTTTTTGGCATCTATCTGGCATTGGGTGTATTGGGATCTAGAAATATTCTGTGATGAACGCACAGGAAAACCTCTTTGG  
ATTTGCCAAAATCTTTGGAATTCATTTATTTCTCTCAGGGGTGGCTTGGCTTTGGGTTTGGCGCATTTTCATGTACAGGT  
TTGTATGGTCCGGAATATGGGTGTCTGATCCTTATGGACTAACGGGAAAAGTGCAATCTGTAAATCCGGCATGGGGCGC  
TGAAGGTTTTGATCCTTTTGTTCGGGGGGAATAGCTTCTCATCATATCGCAGCCGGGACATTGGGTATACTAGCAGGTC  
TATTCATCTTAGTGTCCGCCCACCCCAACGTCTCTACAAAGGATTACGTATGGGTAATATTGAAACTGTTCTTTCCAGT  
AGTATCGCTGCTGTATTTTTTGCAGCTTTCATTGTTGCTGGAACCTATGTGGTACGGTTCAGCAACTACTCCGATTGAATT  
ATTTGGTCCCCTCGTTATCAGTGGGATCAAGGATACTTTCAGCAAGAAATATATCGAAGAGTTGGTACCGGGCTGGCCG  
AAAATCTAAGTTTATCGGAAGCTTGGTCCAAAATTCCTGATAAACTAGCTTTTTTATGATTACATCGGTAATAATCCGGCG  
AAAGGAGGATTATTCAGAGCAGGCTCAATGGACAACGGAGATGGAATAGCTGTTGGGTGGTTAGGACACCCGATCTTTAG  
AGATAAGGAAGGGCATGAACTCTTTGTACGTGATATGCCTACTTTTTTTGAAACATTTCCAGTAGTTTTGGTAGATGGAG  
ACGGAATTTGAGAGCTGATGTTCTTTTAGAAGGGCAGAATCAAAGTACAGTGTGCAACAAGTAGGTGTAACCTGTTGAG  
TTCTATGGTGGTGAACCTCAATAGAGTAAGTTATAGCGATCCTGCTACTGTGAAAAAATATGCTAGACGTGCCCAATTGGG  
TGAGATTTTTGAATTAGATCGAGCTACTTTGAAATCCGATGGTGTTTTTCTGATGACGTTCCAAGGGGTTGGTTCATTTTG  
GACATGCTTCGTTTGGCTTGTCTTTCTTTTTCGGACACATTTGGCATGGTGTGCTAGAACCTTGTTTAGAGATGTTTTTGT  
GGTATCGACCCGGATTTGGATGCCCAAGTAGAATTTGGAGCATTCCAAAAA---  
ATAGGAGATCCAACCTACAAGGAGACAAATA---GTC-----  
ATGAAAACCTTATATTCCTGAGGAGGTTCTACCCCGTGGAAACGCTCTTTAATGGAACCTTTAGCTTTAGCTGGTTCGTGA  
CCAAGAAACCACAGGTTTTGCTTGGTGGGCGGGGAATGCCCGACTTATCAATTTGTCTGGTAAATTAATCGGGGCTCACG  
TGGCCCATGCCGATTAATCGTATTCTGGGCGGGAGCAATGAATCTATTTGAAGTGGCTCATTTTGTACCAGAGAAACCT  
ATGTATGAACAAGGATTAATTTTACTTCCCATCTAGCTAC

Arabidopsis GTCGCTATTCTGCATCC---

AGGGGGGAATATGTTTCGATGGAATAATTTCTTAAATGTATTACCGCATCCCCAAGGGTTAGGCCACTTTTTACGGGTCA  
GTGGAATCTTTATGCTCAAAACCCCGACTCGAGTAGTCATTTATTTGGTACCTCCAAGGATCCGGAAGTCCATTCTAA  
CCCTTCTTGGGGGATTCCATCCACAAACGCAAAGTTTATGGCTAACCGATATGGCACATCATCATTTAGCTATCGCAATT  
CTTTTCCTCATTGCGGGTCATATGTATAGAACGAACTTTGGAATCGGACACAGTATAAAAAGATCTTTTAGAAGCACATAT  
TCCTCCGGGAGGACGATTGGGGCGTGGGCATAAGGGTCTTTATGACACAATCAATAATTCGATTCATTTTCAATTAGGCC  
TTGCTCTAGCCTCCTTAGGAGTTATTACTTCTTGGTAGCTCAACACATGTACTCTTTACCTGCTTATGCGTTCATAGCG  
CAAGATTTTACGACTCAAGCTGCGTTATATACCCATCACCAATATATTGCAGGATTCATCATGACAGGAGCTTTTGCTCA  
TGGAGCTATCTTTTTTATTAGAGATTACAATCCAGAACAGAATGAGGATAACGTATTAGCAAGAATGTTAGACCATAAAG  
AAGCTATCATATCCCATTAAAGTTGGGCCAGCCTCTTTCTAGGGTCCATACTTTGGGACTTTATGTTTCATAACGACGTC  
ATGCTTGTCTTTTGGTACTCCCGAAAAACAAATCTTGATCGAACCTATATTTGCCCAATGGATAACAATCTGCTCATGGGAA  
AAGCTTATGATGGATTTGATGTACTTTTATCTTCGACAAGTGGCCAGCATTTAATGCGGGTCGAGCATATGGTTGCTG  
GCTGGTTAAATGCTATTAATGAGAATAGTAATTCATTATTCTTAAACAATAGGTCCTGGAGATTTCTTGGTTCATCATGCT  
ATTGCTTTAGGTTTACATACAACACTACATTGATCTTAGTAAAAGGTGCTTTAGATGCACGTGGTTCCAAGTTAATGCCAGA  
TAAAAGGATTTCCGGTATAGTTTTCTTGGCATGGTCCGGGACGAGGTGGTACTTGTGATATTTCCGGCTTGGGACGCAT  
TTTTTTGGCAGTTTTCTGGATGTTAAATACTATTGGATGGGTTACTTTTTATTGGCATTGGAAACACATCACATTATGG  
CAGGGTAACGTTTTACAGTTTTAATGAATCTTCCACTTATTTGATGGGATGGTTAAGAGATTATCTATGGTTAAACTCTTC  
ACAACCTATCAATGGATATAACCCGTTTGGTATGAATAGTTTATCAGTCTGGGCATGGATGTTCTTATTTGGGCATCTTG  
TTTGGGCTACAGGATTTATGTTCTTAAATTTCTTGGCGTGGTTATTGGCAGGAATTGATTGAAACTTTAGCGTGGGCTCAT  
GAACGCACACCTTTGGCAAATTTGATTGCTGGAAAGATAAACCAGTAGCTCTTTCAATCGTGCAAGCAAGATTGGTTGG  
ATTAGCTCACTTTCTGTAGGTTATATATTTCACTTATGCGGCTTTCTTGGATTGCCTCCACATCGGGCAAATTCGGT---

ATGTCACATTCAGTAAAAATTTATGATACTTGTATAGGATGTACTCAATGTGTCCGAGCATGCCCTACAGACGTATTAGA  
AATGATACCTTGGGATGGATGTAAGCTAAGCAAATAGCTTCTGCTCCAAGAACCAGGACTGTGTTGGTTGTAAGAGAT  
GTGAATCCGCTGTCCAACGGATTTTTTGGAGCGTTCGAGTTTATTTATGGCATGAAACAACCTCGAAGTATGGGTCTAGCT  
TAT-----  
TTACCCTCTATTTTTGTGCCTTTAGTAGGCCTAGTCTTTCCGGCAATTGCAATGGCTTCTTTATTTCTTCATATTCAAAA  
AAATAAGATTTTT---ATGCGAGATCTAAAAACATATCTTTCC---

GTAGCACCGGTAAGTACTCTATGGTTCGGTTCGTTAGCAGGTTTATTAATAGAGATTAATCGTTTATTTCCAGATGC  
ATTAACATTTCCCTTTTTTTTCATTCC---  
ATGACTGCAATTTTAGAGAGACGCGAAAGCGAAAGCCTATGGGGTCGCTTCTGTAAGTGGATAACTAGCACTGAAACCG  
TCTTTACATTGGATGGTTTTGGTGTTTTGTATGATCCCTACCTTATTGACCGCAACTTCTGTTTTTATTATCGCATTCAATG  
CTGCTCCTCCAGTAGATATTGATGGTATTCGTGAACCTGTTTCTGGATCTCTTCTTTACGGAAACAATATTATTTCCGGT  
GCCATTATTCCTACTTCTGCAGCTATTGGATTGCATTTTTACCCAATCTGGGAAGCTGCATCCGTTGATGAATGGCTATA  
CAACGGCGGTCCTTATGAACATAATTGTTCTACACTTTTTACTTGGTGTAGCTTGTATATGGGTGCTGAGTGGGAACCTTA  
GTTTTCCGTCTGGGTATGCGTCTTGGATTGCTGTTGCATATTCAGCTCCTGTTGCAGCTGCGACTGCTGTTTTCTTGATC  
TATCCAATTGGTCAGGGAAGTTTTTCTGATGGTATGCCTCTAGGAATCTCTGGTACTTTCAACTTTATGATTGTATTCCA  
GGCTGAGCACAACATTCTTATGCACCCATTTACATGTTAGGTGTAGCTGGTGTATTCCGGCGGCTCCCTTTTTAGTGCTA  
TGCATGGTTCCTTGGTAACTTCTAGTTTGTATCAGGGAAACCACAGAAAATGAATCTGCTAATGAAGGTTACAGATTCCGG  
CAAGAAGAAGAACTTACAACATTGTAGCTGCTCACGGTTATTTTGGCCGATTGATTTTCCAATATGCTAGTTTCAACAA  
TTCTCGTTCTTTACATTTCTTCTTAGCGGCTTGGCCGGTAGTAGGTTATTTGGTTTACTGCTTTAGGTATTAGTACTATGG  
CTTTCAACCTAAATGGTTTTCAATTTCAACCAATCAGTAGTTGATAGTCAAGGACGTGTTATTAATACTTTGGGCTGATATT  
ATTAACCGTGCTAACCTTGGTATGGAAGTTATGCATGAACGTAATGCTCACAACCTTCCCTCTAGACCTA---

GCTGCTGTTGAGGCTCCATCTACAAATGGA---  
ATGGGTTTGCCTTGGTATCGTGTTCATACTGTTGTATTGAATGATCCCGGTCGTTTACTTGTCTGTTTCATATAATGCATAC  
TGCTCTAGTTGCTGGTGGGCTGGTTCGATGGCTCTATATGAATTAGCAGTTTTTGTATCCCTCCGACCCCGTCTTTGATC  
CAATGTGGAGACAAGGTATGTTTCGTTATACCTTTCATGACTCGTTTAGGAATAACCAATCTTGGGGCGGTTGGAATATT  
ACAGGGGGGACTATAACGAATCCGGGCTTTGGAGTTACGAAGGGGTAGCCGGAGCACATATAGTGTTTTTCTGGTTTTGTG  
CTTCTTGGCAGCTATTTGGCATTGGGTATATTGGGATCTAGAAAATTTTTTGTGATGAACGTACAGGAAAACCTTCTTTGG  
ATTTGCCAAGATTTTTGGAATTCATTTATTTCTTTCAGGAGTGGCTTGGTTCGGTTTTGGCGCATTTTCATGTAACAGGA  
TTATATGGTCTGGAATATGGGTATCCGACCCTTATGGACTAACCGGAAAGGTACAACCCGTAACCCGGCGTGGGGCGT  
GGAGGGTTTTGACCCTTTTTGTTCCGGGAGGAATAGCCTCTCATCATATTGCAGCAGGGACGTTGGGTATATTAGCGGGCC  
TATTCCATCTTAGTGTTCGTCGCTCAACGTCTATACAAAGGATTACGTATGGGCAATATTGAAACCGTCTTTCCAGT  
AGTATTGCTGCTGTCTTTTTTGCAGCTTTTGTGTTGCTGGAACCTATGTGGTATGGTTCTGCAACTACTCCCATCGAATT  
ATTTGGTCTACTCGTTATCAATGGGATCAGGGATACTTTCAACAAGAAATATATCGAAGAGTTAGTGTGGACTGGCTG  
AAAATCAAAGTTTTATCAGAAGCTTGGGCGAAAATTCCTGAAAAATTAGCTTTTTTATGATTATATTGGTAATAATCCAGCA  
AAAGGGGGGTTATTTCCGAGCGGGTTCAATGGACAATGGGGATGGAATAGCTGTTGGATGGTTAGGCCACCCCGTCTTTAG  
AAATAAGAAGGGCGTGAACCTTTTTGTACGCCGATGCCTACTTTTTTTGAAACTTTTCCGGTAGTTTTTGGTAGACGGAG

ACGGAATTGTTAGAGCTGACGTCCCCTTTAGAAAGGGCAGAATCAAAATATAGTGTGCAACAAGTAGGTGTAAGTGTGAG  
TTTTATGGTGGTGAACCTCAATGGAGTGAGTTATAGTGATCCCGCAACTGTGAAAAAATATGCTAGACGGGCTCAATTGGG  
TGAGATTTTTGAATTAGATCGTGCAGCTTTGAAATCTGATGGTGTTCGTTAGCAGCCCAAGAGGTTGGTTTACGTTTG  
GACATGCTTCGTTTGGCTCTACTTTTCTTCTTTGGACACATTTGGCATGGTGCTAGAACCCTCTTCAGAGATGTTTTTGT  
GGTATTGATCCAGATTTGGATGCTCAAGTGGAAATTCGGGGCATTCCAAAAA---  
CTTGGAGATCCAACCTACAAAACGACAAGCA---GTC-----  
ATGAAAACCTTATATCCCTGAGGAGGTTCTACCACGTGGAAACGCTCTTTAATGGAACCTTTAGCTTTAGCTGGTTCGTGA  
CCAAGAAACCACCGGTTTCGCTTGGTGGGCGGGGAATGCCCGACTTATCAATTTATCTGGTAAACTTTTGGGAGCTCATG  
TAGCCCATGCCGGATTAATCGTATTCTGGGCGGGAGCAATGAACCTATTTGAAGTGGCCCATTTTGTACCTGAAAAGCCC  
ATGTATGAACAAGGATTAATTTTACTTCCCCACCTAGCCAC  
Atropa GTTGCTATTCCTGCATCC---  
AGAGGTGAGTCCGTTTCGGTGGAAATAATTTCTTAGATGTATTACCGCATCCCCAAGGGTTAGGCCCACTTTTTACAGGTCA  
ATGGAATCTTTATGCTCAAAACCCCGATTCAAGTAGTCATTTATTTGGTACCGCCGAAGGGGCGGGAACCTGCCATTCTAA  
CTCTTCTCGGGGATTCCATCCACAAAACGCAAAGTTTATGGCTGACTGATATTGCCCATCACCATTTAGCTATTGCATTT  
ATTTTTCTCGTTGCTGGTCATATGTATAGAACCAATTTCCGGATTGGGCACAGTATGAAAGATCTTTTAGATGCACATAT  
TCCTCCGGGGGACGATTGGGGCGTGGACATAAGGGTCTTTACGACACAATCAACAATTCGCTTCATTTTCAATTAGGCC  
TTGCTCTAGCTTCTTTAGGGGTTATTACTTCTTTGGTAGCTCAACACATGTACTCTTTACCTGCTTATGCATTCATAGCA  
CAAGACTTTACTACTCAAGCTGCATTATATACCCACCACCAATATATCGCAGGATTCATCATGACAGGAGCTTTTGTCTCA  
TGGAGCTATATTGGTCATTAGAGATTACAATCCGGAGCAAATGAAGATAATGTATTGGCAAGAATGTTAGATCATAAAG  
AAGCTATCATATCTCATTTAAGTTGGGCCAGCCTCTTTCTGGGATTCCATACCCTGGGACTTTATGTTTATAATGATGTC  
ATGCTTGCCCTTTGGCACTCCGGAGAAGCAAATCTTGATTGAACCTATATTTGCTCAATGGATACAATCCGCTCATGGTAA  
AACTTCATATGGGTTGATGTACTTTTATCTTCAACGAGTGGCCCAGCATTCAATGCGGGTCAAGCATCTGGTTGCCGG  
GTTGGTTAAATGCTGTTAATGAAAATAGTAATTCATTATTCTTAAACAATAGGTCCTGGAGACTTTTTGGTTTCATCATGCT  
ATTGCTCTTGGTTTACATACAACCTACATTGATCTTAGTAAAAGGTGCTTTAGATGCACGTGGTTCCAAGTTAATGCCAGA  
TAAAAGGATTTCCGGTTATAGTTTTCCGTGCGATGGCCCAGGACGAGGCGGTACTTGTGATATTTCCGGCATGGGACGCGT  
TTTATTTGGCAGTTTTTTGGATGTTAAATACTATTGGATGGGTTACTTTTTATTGGCATTGGAAGCACATCACATTATGG  
CAGGGTAAACGTTTACAGTTTAAATGAATCTTCCACTTATTTGATGGGCTGGTTAAGGGATTATTTATGGTTAAACTCTTC  
ACAACCTATCAATGGATATAAACCCTTTTGGTATGAATAGTTTATCGGTTTGGGCATGGATGTTCTTATTTGGACATCTTG  
TTTGGGCTACTGGATTTATGTTCTTAATTTCTTGGCGTGGATATTGGCAGGAATTGATTGAACTTTAGCATGGGCTCAT  
GAACGCACACCTTTGGCCAATTTGATTCGTTGGAGAGATAAACCAGTGGCCCTTTCCATTGTACAAGCAAGATTGGTTGG  
ATTAGCTCACTTTTCTGTAGGTTATATATTTCACTTATGCGGCTTTCTTGATTGCTCTACGTCGGGCAAATTTGGT---  
ATGTCACATTCAGTAAAGATTTATGATACGTGTATAGGATGTACTCAATGTGTCCGAGCCTGCCCCACCGATGTATTAGA  
AATGATACCTTGGGACGTTTGAAGGCTAAACAAATTGCTTCCGCTCCACGAACAGAGGACTGTGTTGGTTGTAAGAGAT  
GTGAATCCGCTGTCCAACCTGATTTCTTGAGTGTACGAGTTTATTTATGGCATGAAAACAACCTCGCAGTATGGGTCTAGCT  
TAT---ATGACAAATTTGAAC---  
CTTCCATCTATTTTTGTGCCGTTAGTAGGCCTAGTCTTTCCGGCAATTGCAATGGCTTCTTTATTTCTTCATGTTCAAAA  
AAACAAGATTGTT---ATGCGAGATCTAAAAACATATCTCTCT---  
GTGGCACCAGTACTAAGTACGCTATGGTTTCGTGGCTTTAGCAGGTCTATTGATAGAGATTAATCGTTTTTTCCCGGATGC  
GTTGACATTTCCCTTTTTT-----  
ATGACTGCAATTTTAGAGAGACGCGAAAGCGAAAGCCTATGGGGTCGCTTCTGTAAGTGGATAACTAGCACTGAAAACCG  
TCTTTACATTGGATGGTTTTGGTGTTCGATGATCCCTACCTTATTGACGGCAACTTCTGTATTTATTATTCCTTCATTG  
CTGCTCCTCCAGTAGACATTGATGGAATTCGTGAACCTGTTTCAGGGTCTCTACTTTACGGAAACAATATTATTTCCGGT  
GCCATTATTCCTACTTCTGCAGCTATAGGTTTACATTTTTACCCAATCTGGGAAGCGGCATCCGTTGATGAATGGTTATA  
CAACGGTGGTCCTTATGAACTAATGTTCTACACTTCTTACTTGGCGTAGCTTGTTCATGGGTGCTGAGTGGGAGCTTA  
GTTTCCGTCTGGGTATGCGACCTTGGATTGCTGTTGCATATTCAGCTCCTGTTGCAGCTGCTACCGCAGTTTTCTTGATC  
TACCAATCGGTCAAGGAAGTTTTTCTGATGGTATGCCTCTAGGAATCTCTGGTACTTTCAATTTATGATGTTTCA  
GGCTGAGCACACAACCTTATGCACCCATTTACATGTTAGGCGTAGCTGGTGTATTTCGGCGGCTCCCTATTTCAGTGCTA  
TGATGGTTCCCTGGTAACTCTAGTTTATGATCAGGGAAACCACAGAAAATGAATCTGCTAATGAAGGTTACAGATTCCGT  
CAAGAGGAAGAACTTATAATATCGTAGCCGCTCATGGTTATTTTGGCCGATTGATCTTCCAATATGCTAGTTTCAACAA  
CTCTCGTTTCGTTACACTTCTTCTAGCTGCTTGGCCTGTAGTAGGATCTGGTTTACCGCTTTAGGTATCAGCACTATGG  
CTTTCAACCTAAATGGTTTTCAATTTCAACCAATCTGTAGTTGACAGTCAAGGTCGTGTAATTAACACTTGGGCTGATATC  
ATTAACCGTGCTAACCTTGGTATGGAAGTTATGCATGAACGTAATGCTCATAACTTCCCTCTAGACCTA---  
GCTGCTATCGAAGCTCCATCTACAAATGGA---  
ATGGGTTTGCCTTGGTATCGTGTTCATACCGTTGTATTGAATGATCCCGGTCGGTTGCTTTCTGTTTCATATAATGCATAC  
AGCTCTGGTTGCTGGTTGGGCCGTTTCGATGGCTCTGTATGAATTAGCGTTTTTGTATCCTTCTGATCCTGTTCTTGATC  
CAATGTGGAGACAGGGTATGTTTCGTTATACCTTTCATGACTCGTTTAGGAATAACCAATTCATGGGGCGGTTGGAGTATC  
ACAGGGGGGACTGTAACGAATCCGGGATTTGGAGTTACGAAGGTGTAGCTGGAGCACATATTGTGTTTTCTGGCTTATG

CTTTTTGGCAGCTATCTGGCATTGGGTGTATTGGGATCTAGAAATATTTTGTGATGAACGTACAGGAAAACCTCTTTGG  
ATTTGCCAAAGATCTTTGGAATTCATTTATTTCTCTCAGGGGTGGCTTTGGTTTTGGTGCATTTTCATGTAACAGGC  
TTGTATGGTCCCGGAATATGGGTGTCCGATCCTTATGGACTAACGGGAAAAGTACAACCTGTAAATCCAGCGTGGGGCGT  
GGAAGGTTTTGATCCTTTTGTCCAGGAGGAATAGCCTCTCATCATATTGCAGCAGGAACATTGGGCATATTAGCGGGCC  
TATTCATCTTAGCGTCCGTCGCCACAACGTCTATACAAAGGATTGCGTATGGGAAATATTGAAACCGTCCTTTCCAGT  
AGTATCGCTGCTGTCTTTTTTGCAGCTTTTGTGGTCCGGAACCTATGTGGTATGGTTCCGGCAACTACCCCGATTGAATT  
ATTTGGGCCACTCGTTATCAATGGGATCAGGGGTACTTCCAGCAAGAAATATATCGAAGAGTTAGTGCTGGGCTAGCAG  
AAAATCAAAGTTTATCAGAAGCCTGGTCTAAAATTCCTGAAAAATTAGCTTTTTATGATTACATCGGCAATAATCCGGCA  
AAAGGAGGATTATTAGAGCGGGTCAATGGATAACGGGGATGGAATAGCGGTTGGATGGTTAGGACACCCTATCTTTAG  
AGATAAAGAAGGGCGTGAACTTTTGTACGTCTGATGCCTACCTTTTTGAAACATTCGGGTCGTTTTGGTAGACGGCG  
ATGGAATTGTTAGAGCCGATGTTCTTTTAGAAGGGCAGAATCGAAGTATAGTGTGAACAAGTAGGTGTAACATGTTGAG  
TTCTACGGCGGTGAACCAACGGCGTCAGTTATAGTGATCCTGCTACTGTGAAAAAATATGCTAGACGTGCTCAATTGGG  
TGAAATTTTTGAATTAGATCGTGCTACTTTGAAATCCGATGGTGTTCGTTAGCAGTCCAAGGGGTTGGTTTTACTTTTG  
GGCATGCTTCGTTTGGCTTTGCTCTTCTTCTCGACACATTTGGCATGGTGCTAGAACCTTGTTCAGAGATGTTTTGCT  
GGTATTGACCCAGATTTAGATGCTCAAGTCAATTTGGAGCATTCCAAAA---  
CTTGGAGATCCAATAACAAAAGACAGGCA---GCC-----  
ATGAAACCTTATATTCCTGAGGAGGTTCTACCACGTGGAAACGCTCTTTAATGGAACCTTTAGCCTTAGCTGGTCTGTA  
CCAAGAAACCACCGGTTTCGCTTGGTGGGCCGGGAATGCCCGACTTATCAATTTATCCGGTAAACTACTAGGGGCTCATG  
TAGCCCATGCTGGATTAATCGTATTCTGGGCCGGAGCAATGAACCTATTTGAAGTGGCCATTTTCGTACCAGAGAAGCCT  
ATGTATGAACAAGGATTGATTTTACTTCCCCACCTAGCTAC  
Buxus                   GTCGCTATTCTGGATCC---  
AGGGGGGAGTACGTTTCGATGGAATAATTTCTTAGATGTATTACCACATCCCCAAGGGTTAGGCCCACTTTTTACAGGTCA  
GTGGAATCTTTATGCTCAAAATCCCGATTCCAGTAGTCATTTATTTGGTACCTCTCAAGGAGCGGGAACTGCCATTCTAA  
CCCTTCTCGGGGGATTCCATCCACAAACGCAAAGTTTATGGCTGACCGATATTGCACACCATCATTTAGCTATTGCATTT  
ATTTTTCTCGTTGCTGGTCAATATGTATAGAATAACTTCGGGATTGGGCACAGTATGAAAGATCTTTTAGAAGCACATAT  
TCCTCCGGGGGGCGATTGGGACGTGGACATAAGGGTCTTTATGACACAATCAATAATTCGATTCAATTTCAATTAGGCC  
TTGCTCTAGCTTCTTTAGGGGTTATTACTTCTTGGTAGCTCAACACATGTACTCCTTACCCGCTTATGCGTTCATAGCA  
CAAGACTTTACTACTCAAGCTGCGTTATATACTCAACCAATACATGTCAGGATTTATCATGACAGGAGCTTTTGTCTCA  
TGGAGCTATATTTTTTATTAGAGATTACAATCCGGAACAGAATGAGGATAATGTATTGGCAAGAATGTAGACCATAAAG  
AAGCTATCATATCCCAATTAAGTTGGGCCAGCCTCTTTCTGGGGTTCCATACCTTGGGACTTTATGTTTATAACGATGTC  
ATGCTCGCTTTTGGTACTCCGGAAAAACAATCTTGATTGAACCCATATTTGCCCAATGGATACAATCTGCTCATGGTAA  
GACTTCATATGGGTTTCGATGTAATTTTATCTTCAACAAATGGCCCAGCATTTAATGCGGGTTCGAAGCATATGGTTACCTG  
GCTGGTTAAATGCTATTAATGAGAATAGTAATTCACTATTCTTAAACAATAGGCCCTGGAGACTTCTTGGTTCATCATGCT  
ATTGCTCTAGGTTTACATACAACCTACATTGATCTTAGTAAAAGGAGCTTTAGATGCACGCGGTTCCAAGTTAATGCCGGA  
TAAAAGGATTTTCGGTTATAGTTTTCTTGGCAGCGTCCGGGACGAGGTGGTACTTGTGATATTTTCGGCTTGGGACGCAT  
TTTTTTGGCAGTTTTCTGGATGTTAAATACCATTGGATGGGTTACTTTTTATTGGCATTGGAAACACATTACATTATGG  
CAGGGTAACGTTTTCACAGTTTAAATGAGTCCCTCCACTTATTTGATGGGATGGTTAAGAGATTATCTATGGTTAAACTCTTC  
ACAACCTATCAATGGATATAACCCTTTTGGTATGAATAGTTTATCGGTCTGGGCGTGGATGTTCTTATTTGGACATCTTG  
TTTGGGCTACTGGATTTATGTTCTTAAATTTCTTGGCGTGGATATTGGCAGGAATTGATTGAAACTTTAGCATGGGCTCAT  
GAACGCACACCATTGGCTAATTTGATTGATGGAGAGATAAACCAGTGGCTCTTTCCATTGTGCAAGCAAGATTGGTTGG  
ATTAGCCCACTTTTCTGTAGGTTATATATTTACTTATGCAGCTTTCTTGATTGCCTCTACATCGGGAAAATTTGGT---  
ATGTCACATTCAGTAAAAATTTATGATACATGTATAGGGTGTACTCAATGTGTACGAGCCTGCCCCACAGATGTATTAGA  
AATGATACCTTGGGACGGATGTAAAGCTAAGCAAATGCTTCTGCTCCAAGAACAGAGGACTGTGTAGGTTGTAAGAGAT  
GTGAATCCGCTTGCCAACGGATTTCTTGAGTGTCCGGGTTATTTATGGCATGAGACAACCTCGTAGTATGGGTCTAGCT  
TAT---ATGAAC-----AAC---  
TTACCTTCTATTTTTGTGCCTTTAGTGGCCCTAGTATTTCCGGCAATTGCAATGGCTTCTTTATCTCTTCATGTTCAAAA  
AAACAAGATTGTC---ATGCGAGATCTAAAAACATATCTCTCC---  
GTGGCACCTGTGCTAAGTACTCTATGGTTCGGGTCTTTAGCAGGTCTATTGATAGAGATCAATCGTTTATTCCAGATGC  
GTTGACATTTCCCTTTTTTTTCAATC---  
ATGACTGCAATTTTAGAGAGACGCGAAAGCGAAAGCCTATGGGGTTCGCTTCTGTAACCTGGATAACCAGCACTGAAAACCG  
TCTTTACATCGGATGGTTCGGTGTTTTGTATGATCCCTACTTTATTGACCGCAACTTCTGTATTTATTATTGCCTTTATTG  
CTGCTCCTCCAGTAGATATTGATGGTATTCGTGAACCTGTTTCTGGATCTCTACTTTATGGAAACAATATTATCTCTGGT  
GCCATTATTCCTACTTCTGCAGCTATAGGTTTACACTTTTATCCGATCTGGGAAGCGGCATCCGTTGATGAATGGTTATA  
CAATGGTGGTCTTATGAGTTAATTGTTCTACACTTCTTACTTGGTGTAGCTTGTACATGGGTGCTGAGTGGGAACTTA  
GTTTCCGCTCTGGGATGCGCCCTTGGATTGCTGTTGCATATTAGCTCCTGTTGCAGCTGCTACTGCTGTTTTCTTGATC  
TACCAATTGGTCAAGGAAGCTTCTCTGACGGTATGCCCTAGGAATCTCTGGTACTTTCAACTTCATGATTGTATTCCA  
GGCTGAGCACAACATCCTTATGCACCCATTTACATGTTAGGCGTAGCTGGTGTATTTCGGCGGCTCCCTATTTAGTGCTA

TGCATGGTTCTTTGGTAACCTCTAGTTTGATCAGGGAAACCACAGAAAATGAATCTGCTAATGAAGGTTACAGATTCCGT  
CAAGAGGAAGAACTTATAATATCGTAGCTGCTCATGGTTATTTTGGCCGATTGATCTTCCAATATGCTAGTTTCAACAA  
TTCTCGTTCTTTACATTTCTTCTAGCTGCTTGGCCTGTAATAGGTATCTGGTTCACTGCTTTAGGTATTAGCACCATGG  
CTTTCAACCTAAATGGTTTTCAATTTCAACCAATCCGTAGTTGACAGTCAAGGTCGTGTAATTAACACTTGGGCTGATATC  
ATTAACCGTGCTAACCTTGGTATGGAAGTTATGCATGAGCGTAATGCTCACAACTTCCCTCTAGACCTA---  
GCTGCTGTGCAAGCTCCATCCACAAATGGA---

ATGGGTTTGCCTTGGTATCGTGTTCATACCGTTCGATTGAATGATCCCGGTCGCTTGGCTTGTCCATATAATGCATAC  
AGCTCTAGTTGCTGGTTGGGCCGGTTCAATGGCTCTATATGAATTAGCAGTTTTTGTATCCCTCTGACCCCGTTCTTGATC  
CAATGTGGAGACAGGGTATGTTTCGTTATACCCCTTCATGACTCGTTTAGGAATAACCAATTCATGGGGGGGTTGGAGTATT  
ACAGGAGGGACTATAACGAATCCGGGTATTTGGAGTTACGAAGGTGTGGCAGGGGCACATATTGTGTTTTCTGGCTTGTG  
CTTCTTGGCGGCTATTTGGCATTTGGGTGATTTGGGATCTAGAAATCTTTTGTGATGAACGTACAGGAAAACCTTCTTGG  
ATTTGCCCAAGATCTTCGGAATTCATTTATTTCTCTCCGGGGTGGCTTGGCTTCGGGTTTGGTGCATTTTCATGTAACAGGC  
TTGTATGGTCCGGAATATGGGTGTCCGATCCTTATGGACTAACTGGAAAAGTACAATCTGTAATCCCGCGTGGGGCGT  
GGAAGGTTTTGATCCTTTTGTTCGGGAGGAATAGCCTCTCATCATATTGCAGCAGGGACATTGGGCATATTAGCGGGTC  
TTTTCCATCTTAGCGTCCGCCCGCCACAACGCTCTATACAAAGGATTACGTATGGGCAATATTGAAACTGTACTTTCCAGT  
AGTATTGCTGCTGTCTTTTTTGCAGCTTTTGTGTTGCTGGAACTATGTGGTATGGTTCAGCAACTACCCCGATCGAATT  
ATTTGGCCCCACTCGTTATCAATGGGATCAGGGATACTTCCAGCAAGAAATATATCGAAGAGTTGGCGTCTCGCTAGCCG  
AAAATAAAAGTTTTATCAGAAGCTTGGTCTAAAATTCCTGAAAAATTTGGCTTTTTATGATTACATCGGAAATAATCCAGCA  
AAAGGGGGATTATTTAGAGCGGGTTCATGGACAATGGGGATGGAATAGCTGTTGGATGGTTAGGACACCCCATATTTAG  
AGATAAAGAAGGGCGTGAGCTTTTTGTACGTCGTATGCCTACTTTTTTGAACATTTCCAGTCGTTTTTGGTAGACGGAG  
ACGGAATTTGTGAGAGCCGACGTTCTTTTAGAAGGGCAGAATCGAAGTATAGTGTGCAACAAGTAGGTGTAAGTGTGAG  
TTCTATGGTGGAGAATCAATGGAGTCAGTTATAGTGATCCTGCTACTGTGAAAAAATATGCTAGACGCGCTCAATTGGG  
TGAAATTTTTGAATTAGATCGCGCTACTTTAAAATCCGACGGTGTTTTTTCGCAGCAGCCCAAGGGGCTGGTTTTACTTTTG  
GACATGCGTCGTTTTGCTTTGCTCTTCTTTTTTCGGACACATTTGGCATGGCGCTCGAACCTTGTTCAGAGATGTTTTTGT  
GGTATTGACCCAGATTTAGATGCTCAAGTGGAAATTTGGAGCATTCCAAAAA---

CTTGGAGATCCAATAACAAGGAGACAAGTA---GTC-----  
ATGAAAACCTTATATCCCTGAGGAGGTTCTACCCCGTGGAAACGCTCTTTAATGGAACCTTTAGCTTTAGCTGGTTCGTGA  
CCAAGAAACCACCGGTTTCGCTTGGTGGGCCGGGAATGCCGACTTATCAATTTGTCCGGTAAACTACTCGGGGCTCACG  
TAGCCCATGCCGATTAATCGTATTTCTGGCCGGGAGCAATGAACCTTTTTGAAGTGGCTCATTTTCGTACCAGAGAAGCC  
ATGTATGAACAAGGATTGATTTTACTTCCCCACTAGCTAC

Calycanthus GTCGCTATTCCCGGAGCA---  
AGGGGGGAGTATGTCAGATGGAATAATTTCTTAGATGTATTACCACATCCCCAAGGGTTGGCCCCACTTTTTACAGGTCA  
GTGGAATCTTTATGCCCAAAACCCCGATTCCAGTAGTCATTTATTTGGTACCTCCCAAGGGGCAGGAAGTCCATTCTAA  
CTCTTCTCGGGGATTCCATCCACAAACGCAAAGTTTTATGGCTGACCGATATTGCTCATCATCATTAGCTATTGCATTT  
ATTTTTCTCGTTGCTGGTTCATATGTATAGAATAACTTCGGGATTGGGCACAGTATGAAAGATCTTTTAGAAGCACATAT  
TCCCCAGGGGGTCGATTGGGACGTGGGCATAAGGGTCTTTATGACACAATCAATAATTCGATTCACTTTCAATTAGGCC  
TTGCTCTAGCCTCTTTAGGGGTTATTACTTTCCTTGGTAGCTCAACACATGTACTCTTTACCTGCTTATGCATTATAGCA  
CAAGACTTTACTACTCAAGCTGCGTTATATACCCATCACCAATACATTGCAGGGTTCATCATGACAGGAGCCTTTGCTCA  
TGGAGCTATATTCTTCATTGAGATTACAATCCGGAGCAGAATGAGGATAATGTATTGGCAAGAATGTTAGACCATAAAG  
AAGCTATCATATCTCATTTAAGTTGGGCCAGCCTGTTTCTGGGGTTCATACCTTAGGACTCTATGTTTATAACGACGTC  
ATGCTCGTTTTTGGTACTCCGGAGAAACAAATCTTGATCGAACCATATTTGCCCAATGGATACAATCCGCTCATGGTAA  
GACTTCATATGGGTTGATGTACTTTTATCTTCAACGAATGGACCGGCATTCAATGCTGGTTCGAAGTATATGGTTACCGG  
GCTGGTTGAACGCCGTTAATGAGAATAGTAATTCATTATTCTTAAACAATAGGTCCTGGAGACTTCTTGGTTCATCATGCT  
ATTGCTCTAGGTTTGCATACAACACTACATTGATCTTAGTAAAGGGTGTCTTTAGATGCACGTGGTTCTAAGTTAATGCCAGA  
TAAAAAAGATTTCCGTTATAGTTTTCTTTCGACGGTCTGGACGAGGTGGTACTTGTGATATTTCCGGCCTGGGACGCAT  
TTTATTTGGCCGTTTTCTGGATGTTAAATACTATTGGATGGGTTACTTTTTTATTGGCATTGGAAGCACATCACATTATGG  
CAGGGTAAACGTTTTCACAATTTAACGAATCCTCCACTTATTTGATGGGATGGTTAAGAGATTATCTATGGTTAAACTCTTC  
ACAACCTTATCAATGGATATAACCCTTTTGGTACGAATAGTTTATCGGTCTGGGCGTGGATGTTCTTTTTTGGGCATCTTG  
TTTTGGGCTACTGGATTTATGTTCTTAAATTTCTGGCGTGGATATTGGCAGGAATTGATTGAAACTTTAGCATGGGCTCAT  
GAACGCACGCCTTTGGCTAATTTGATTGATGGAGGGATAAACCAGTGGCTCTTTCCATTGTGCAAGCAAGATTGGTTGG  
ATTAGCTCACTTTTCTGTAGGTTATATATTTCACTTATGCAGCTTTCTGATTGCCTCTACATCAGGCAAATTTGGT---

ATGTACATTACAGTAAAGATTTATGATACATGTATAGGGTGTACTCAATGTGTACGAGCCTGCCCCACAGATGTATTGGA  
AATGATACCTTGGGACGGATGTAAAGCTAAGCAAATTTGCTTCTGCTCCAAGAACAGAGGACTGTGTGGGTTGTAAGAGAT  
GTGAATCTGCTTGTCCAACGGATTTCTTGAGTGTTCGGGTTATTTATGGCATGAGACAACCCGAAGCATGGGTCTAGCT  
TAT-----  
TTACCCTCTATTTTTGTGCCTTTAGTGGGCCTAATGTTTTCCAGCAATTGCAATGGCTTCTTTATCTCTTCATATTCAAAA  
AAATAAGATTATT---ATGCGAGATATAAAAAACATATCTCTCC---

ACGGCACCTGTGCTAGCTACTCTATGGTTCGGGTCTTTAGCAGGTCTATTGATAGAGATCAATCGTTTATTCCCAGATGC  
GTTGACATTCCCTTTTTTTTTCATTCC---  
ATGACTGCAATTTTAGAGAGACGCGAAAGCACAAGCCTATGGGGTCGCTTCTGTAACCTGGATAACCAGCACTGAAAACCG  
TCTTTATATTGGATGGTTCGGTGTGTTTATGATGATCCCTACCTTATTGACCGCAACTTCTGTATTTATTATTGCCTTCATTG  
CTGCTCCTCCAGTAGATATTGATGGTATTCGTGAACCTGTTTCTGGATCTCTACTTTATGGAAACAATATTATCTCTGGT  
GCCATTATTCCCTACTTCTGCAGCTATAGGTTTGCATTTTTACCCGATCTGGGAAGCAGCATCCGTTGATGAATGGTTATA  
CAACGGTGGTCCCTTATGAGCTAATTGTTCTACACTTTTTACTTGGTGTAGCTTGTACATGGGTCTGAGTGGGAACCTTA  
GTTTCCGTCTGGGTATGCGTCCCTGGATTGCTGTTGCATATTCAGCTCCTGTTGCAGCAGCTACTGCTGTTTTCTTGATC  
TACCCTATCGGTCAAGGAAGTTTTCTGATGGTATGCCTCTAGGAATATCTGGTACTTTCAACTTTATGATTGTATTCCA  
GGCTGAGCACAACATCCTTATGCATCCATTTACATGTTAGGCGTAGCTGGTGTATTTCGGCGGCTCCCTATTTCAGTGTCTA  
TGCATGGTTCCTTGGTAACTCTAGTTTAACTCAGGGAACCACTGAAAATGAATCTGCTAATGCAGGTTACAGATTTCCGCT  
CAAGAGGAAGAACTTACAATATAGTAGCCGCTCATGGTTATTTTGGCCGATTGATCTTCCAATATGCTAGTTTCAACAA  
CTCTCGTTCTTTACACTTCTTCTAGCTGCTTGGCCTGTAGTAGGTTATTTGGTTTACCAGCTTTAGGTATCAGCACCATTGG  
CTTTCAACCTAAATGGGTTCAATTTTAAACCAATCTGTAGTTGACAGTCAAGGTCGTGTTATTAACACTTGGGCTGATATC  
ATCAATCGCGCTAACCTTGGTATGGAAGTTATGCATGAACGTAATGCTCACAACCTTCCCTCTAGACCTA---  
GCTGCTGTTGAAGTTCGGTCTACAAATGGA---  
ATGGGTTTGCCTTGGTATCGTGTTCATACCGTTCGATTGAATGATCCTGGTTCGGTTGCTTTTCTGTCCATATAATGCATAC  
AGCTCTAGTTTTCTGGTGGGCGGTTTCGATGGCTCTATACGAATTAGCAGTTTTTGTATCCCTCTGACCCTGTTCTTGATC  
CAATGTGGAGACAAGGTATGTTTCGTTATACCCTTCATGACTCGTTTAGGAATAACCAATTCATGGGGTGGTTGGAGTATC  
ACAGGAGGAACATAACGAATCCGGGTATTTGGAGTTACGAAGGTGTGGCCGGGGCACATATTGTGTTTTCTGGCTTGTG  
CTTCTTAGCAGCTATCTGGCATTGGGTATATTGGGACCTAGAAAATATTCTGTGATGAACGTACAGGAAAACCTCTTTGG  
ATTTGCCCAAGATCTTTGGAATTCATTTATTTCTCTCAGGGGTGGCTTGGCTTTGGGTTTGGCGCATTTTCATGTAACAGGT  
TTGTATGGTCCCGGAATATGGGTGTCCGACCCTTATGGCCTAACCGGAAAAGTACAACCTGTAAATCCGGCGTGGGGCGC  
GGAAGGTTTTGATCCTTTTGTTCGGGAGGAATAGCCTCTCATCATATTGCAGCAGGTACATTGGGCATATTAGCGGGTC  
TATTCCATCTTAGTGTCCGCCCACCCCAACGTCTATACAAAGGATTACGTATGGGCAATATTGAAACTGTCTTTTCTAGT  
AGTATCGCTGCTGTCTTTTTTGCAGCTTTCGTTGTTGCTGGAACCTATGTGGTATGGCTCAGCAACTACCCCGATCGAATT  
ATTTGGTCCCCTCGTTATCAGTGGGATCAGGGATACTTCCAGCAAGAAATATATCGAAGAGTTGGCGCCGGACTAGCCG  
AAAATCTAAGTTTATCGGAAGCTTGGTCTAAAATTTCCCGAAAAATTAGCTTTTTATGATTACATCGGCAATAATCCAGCG  
AAGGTTGATTATTCAGAGCAGGCTCAATGGACAACGGGGATGGAATAGCTGTTGGATGGTTAGGACACCCCTTTTTAG  
AGATAAAGAAGGGCATGAGCTTTTTGTGCGTGTATGCCTACTTTTTTTGAAACATTTCCGGTAGTTTTGGTAGACGGAG  
ACGGAATTGTGAGAGCCGATGTTCTTTTTCGAAGGGCGGAATCAAAGTATAGTGTGCAACAAGTGGGTGTAACCTGTTGAG  
TTCTATGGCGGCGAACTCAATGGAGTCAGCTATAGCGATCCTGCTACTGTGAAAAAATATGCTAGACGTGCCCAATTGGG  
TGAAATTTTTGAATTAGATCGTGCTACTTTGAAATCCGATGGTGTTTTTTTCGGAGCAGTCCAAGGGGTTGGTTCACTTTTG  
GACATGCTACGTTTGGCTTGTCTTTCTTTTTTTCGGACACATTTGGCACGGCGCTAGAACCTTGTTCAGAGATGTTTTTGT  
GGTATTGACCCAGATTTGGATGCTCAAGTGGAAATTTGGAGCATTCCAAAAA---  
CTTGGAGATCCAACCTACAAGAAGACAAGTA---GTC-----  
ATGAAAACCTTATATTCCCTGAGGAGGTTCTACCCCGTGAAACGCTCTTTAATGGAACCTTTAGCTTTAGCCGGTCTGTA  
CCAAGAAACCACTGGGTTTCGCTTGGTGGGCGGGGAATGCCCGACTTATCAATTTGTCCGGTAAACTACTCGGGGCTCACG  
TAGCCCATGCCGATTAATCGTATTCTGGGCGGAGCAATGAACCTATTTGAAGTGGCTCATTTTCGTACCAGAGAAACCC  
ATGTATGAACAAGGATTGATTTTACTTCCCCATCTAGCTAC  
Ceratophyllum GTCGCTATTCCCGCATCA---  
AGAGGGGAGTACGTACAGATGGAATAATTTCTTAAGTGTATTACCGCATCCGCAAGGATTGGGCCCCACTTTTTACAGGTCA  
GTGGAATATTTATGCCCAAAACCCCGATTCCAGTAGTCATTTATTTGGTACCTCCCAAGGGGCAGGAACTGCCATTCTAA  
CTCTTCTCGGGGATTTTCATCCGCAAACGCAAAGTTTATGGCTGACCGATATTGCACACCATCATTAGCTATTGCTTTT  
ATTTTTCTCATTGCTGGTACATGTATAGAACGAACCTTCGGGATTGGGCACAGTATAAAAAGATCTTTTAGAAGCACATAT  
TCCTCCGGGGGGTTCGATTGGGACGTGGACATAAGGGTCTTTATGACACAATCAACAATTCGCTTCATTTTCAATTAGGTC  
TTGCTTAGCGTCTTTAGGGGTTATTACTTCTTGGTAGCTCAACACATGTATTCTTTACCTGCTTATGCATTATAGCA  
CAAGACTTTACTACTCAAGCTGCATTATATACTCATACCAATACATCGCAGGGTTTCATCATGACAGGAGCCTTTGCTCA  
TGGAGCTATATTCTTCATTTCGAGATTACAATCCGGAACAGAATGAAGATAATGTATTGGCAAGAATGTTAGACCATAAAG  
AAGCTATCATATCTCATTAAAGTTGGGTAAGTCTGTTTCTGGGGTTCATACTTTGGGACTCTACGTTTATAACGATGTC  
ATGCTTGCTTTTGGTACTCCGGAGAAACAAATTTTAAATCGAACCAATATTTGCCCAATGGATACAATCCGCTCATGGTAA  
GACTTCATATGGGTTTCGATGTACTCTTATCTTCAACGAGTGGCCCAGCATTCAATGCTGGTTCGAAGTATATGGTTACCCG  
GCTGGTTGAATGCTGTTAATGAGAATAGTAATTCATTATTCTTAAACAATAGGTCCTGGAGACTTTTTGGTTACCATGCT  
ATTGCTCTAGGTTTGCATACAACCTACATTGATTTTAGTAAAAGGTGCTTTAGATGCGCGTGGTTCCAAGTTAATGCCAGA  
TAAAAGGATTTTCGGTTATAGTTTTCTTTCGACGGTCCCGGACGAGGCGGTACTTGTGATATTTCCGCTTGGGACGCGT  
TTTTTTTGGCCGTTTTTTGGATGTTAAATACGATTGGGTGGGTTACTTTTTTATTGGCATTGGAAGCACATTACATTATGG  
CAGGGTAACGTTTTACAATTTAATGAATCTTCCACTTATTTGATGGGATGGTTAAGAGATTATCTATGGTTAAACTCTTC

ACAAC TTATTAACGGATATAATCCATTTGGTACGAATAGTTTATCCGTTTGGGCGTGGATGTTCTTATTTGGCCATCTTG  
TTTGGGCTACGGGATTTATGTTCTTAATTTTCTGGCGTGGGTATTGGCAGGAATTGATTGAAACTTTAGCATGGGCTCAT  
GAACGTACACCTTTGGCTAATTTGATTAGATGGAGAGATAAACCGGTGGCTCTTTCTATCGTTCAAGCAAGATTGGTTGG  
ATTAGCTCATTCTGTAGGTTATATATTTCACTTATGCAGCTTTCTTGATTGCCTCTACATCAGGTAAATTTGGTTAAA  
TGGCGCATTAGTAAAGATTTATCATACATGTATAGGGTGTACTCAGTGTGTACGAGCCTGCCCCACAGATGTATTAGAA  
ATGATACCTTGGGACGGATGTAAAGCTAAGCAAATTTGCTCCTGCTCCAAGAACAGAAGATTGTGTAGGTTGTAAGAGATG  
TGAATCCGCTTGTCCAACAGATTTTTTAAGTGTCCGAGTTTATTTAGGACCTGAAACCACGCGCAGCATGGGTCTAGCTT  
ATTGAATGACATATTTTAAAC---

TTTCCCTCTATTTTGTGCCTTTAGTGGGCTTAGTATTTCCGGCAATTGCAATGGCTTCTTTATTTCTTCATGTTCAAAA  
AAATAAGATTGTCTAGATGCGCGATATAAAAAACATATCTCTCT---

GTGGCACCTTGTATAAGTACTCTATGGTTCGGGTCTTTAGCGGGTCTATTGATAGAGATCAATCGTTTATTCCAGATGC  
GTTGGTATTTCCCTTTTTTTTTCATTCTAGATGACTGCAATTTTAGAGAGACGCGAAAGCGCAAGCCTGTGGGGTCTGTTTCT  
GTAACGTGATAAAGTACTGCAATCGTCTTTACATCGGATGGTTTTGGTGTGTTTGGTGTGTTTGGTGTGTTTGGTGTGTTT  
ACTTCTGTATTTATTATCGCCTTCATTGCTGCTCCTCCTGTAGATATTGATGGTATTCGTGAACCTGTTTCTGGATCTCT  
GCTTTACGGAAACAATATTATTTCCGGTGGCATTATTTCTACTTCTGCAGCTATCGGTTTGCATTTTTACCCTATTTGGG  
AAGCTGCGTCCGTTGATGAATGGTTATAACAATGGCGGTCTTATGAACTAATTGTTCTACACTTCTTACTTGGTGTAGCT  
TGTTACATGGGTGCTGAGTGGGAACCTAGTTTCCGCTGCTGGGTATGCGTCTTGGATTGCTGTTGCATATTCAGCTCCAGT  
TGCAGCTGCTACAGCTGTTTTCTTGATCTATCCTATCGGTCAAGGAAGCTTTTTCTGATGGTATGCCTCTAGGAATTTCTG  
GTACTTTCAACTTCATGATTGTATTCCAGGCTGAGCACAACATCCTTATGCATCCATTTACATGTTAGGCGTAGCTGGT  
GTATTCGGCGGCTCCTTATTCAGTGTATGCATGGTTCCTTGGTAACTCTAGTTTGGTGTGTTTGGTGTGTTTGGTGTGTTT  
ATCTGCTAATGAAGGTTACAGATTCGGTCAAGAGGAAGAACTTATAATATCGTAGCTGCTCATGGTTATTTTGGCCGAT  
TGATCTTCCAATATGCTAGTTTCAACAATTTCTGTTTCTTACATTTCTTCTTAGCTGCTTGGCCTGTAGTAGGTATCTGG  
TTCACAGCTTTAGGTATCAGCACCATGGCTTTCAACCTAAATGGTTTTCAATTTCAACCAATCCGTAGTTGATAGTCAAGG  
TCGTGTTATTAACACTTGGGCAGATATCATCAACCGTGCGAATCTTGGTATGGAAGTAATGCATGAACGTAATGCTCACA  
ACTTCCCTCTAGATCTA---

GCTGCTGTGAAGCTCCATCTACAAATGGATAAATGGGTTTGCCTTGGTATCGTGTTCATACTGTGCTATTGAATGATCC  
CGGTCCGTTGCTTTCTGTACATATAATGCATACAGCTCTAGTTTCCGGTTGGGCGGTTCAATGGCTCTATATGAATAG  
CTGTTTTTGGTCTCTGATCTGTTCTTGTATCCAATGTGGAGACAAGGTATGTTTCGTTTATACCCTTCATGACTCGTTTA  
GGAATAACCAATTCATGGGTGGTTGGAGTATCACAGGAGGACTATAACGAATCCGGGTCTTTGGAGTTACGAAGGTGT  
GGCTGGGGCACATATTATGTTTTCTGGCTTGTGCTTCTTGGCAGCTATCTGGCATTGGGTGTATTGGGACCTAGAAATAT  
TCTGTGATGAACGTACGGGAAAACCTTCTTTAGATCTGCCAAGATTTTTGGAATTCATTTATTTCTCTCAGGGTTGGCT  
TGCTTTGGGTTTGGCGCATTTTCATGTAACAGGGTTGTATGGTCTTGGAAATATGGGTGTCCGATCCTTATGGACTGACTGG  
AAAAGTACAATCTGTAAGTCCAGCTTGGGGTGGCGAAGGTTTTGATCCTTTTGTCCCGGGAGGAATAGCTTCTCATCATA  
TTGCAGCGGGTACATTGGGCATATTAGCAGGCCTATTCCATCTTAGTGTCCGCCACCCCAACGTCTATACAAAGGATTA  
CGTATGGGAAATATTGAACTGTCTCTCCAGCAGTATCGCAGCTGTCTTTTTTGCAGCTTTTCGTTGTTGCTGGAACCTAT  
GTGGTATGGGTGAGCAACTACCCCATCGAATTTTGGGCCACTCGTTATCAGTGGGATCAAGGATACTTCCAGCAAG  
AAATATATCGAAGAGTTGGCAACGGGCTATCCGAAAATCTTAGTTTATCGGAAGCTTGGTCTAAAATTTCCCGAAAAATTA  
GCTTTTTATGATTACATCGGTAATAATCCGGCGAAGGGGGGATTATTTAGAGCGGGCTCAATGGACAACGGGGATGGAAT  
AGCTGTTGGATGGTTAGGACACCCCGTCTTTTCGAGATAACGAAGGGCGTGAGCTTTTTGTACGTGCGATGCCGACTTTTT  
TTGAAACATTTCTGTAGTTTTGGTAGACGGAGATGGAATTTGTGAGAGCCGATGTTCTTTTTCGAAGGGCAGAATCCAAG  
TATAGTGTGCAACAAGTAGGTGTAACCTGTTGAGTCTATGGTGGCGAAGTCAATGGAGTCAGTTATAGCGATCCTGCTAC  
TGTGAAAAAATATGCTAGACGCGCTCAATTGGGGGAAATTTTTGAGTTAGATCGTGTACTTTGAAATCCGATGGTGT  
TTTCGTAGTAGCCCAAGAGGGTGGTTACTTTTGGACATGCTTCGTTTGTCTTTGCTTCTTTTTTCCGGACACATTTGGCAT  
GGTGTAGAACCTTGTTCAGAGATGTTTTGCTGGTATTGACCCAGATTTGGATGCTCAAGTGGAAATTTGGGACATTTCCA  
AAAA---CTTGGGGATCCAAC TACAAGAAGGCAAGTA---GTCTGA-----

GTGGAAACGCTCTTTAATGGAAC TTATCTTTAGCTGGTCTGTGACCAAGAGACTACTGGGTTTCGTTGGTGGGCGGGGAA  
TGCCCGACTTATCAATTTGTCTGGTAAACTACTCGGGGCTCACGTAGCCCATGCCGATTAATCGTATTTTGGGCCGGAG  
CAATGAACCTCTTTGAAGTGGCTCATTTCGTACCAGAAAAGCCCATGTATGAACAAGGATTAATTTTACTTCCCCACCTA  
GCTAC

Chloranthus GTCGCTATTCCCGGATCA---

AGGGGGGAGTATGTCAGATGGAATAATTTCTTAGATGTATTACCGCATCCTCAAGGGTTGGGCCACTTTTTACAGGTCA  
GTGGAATCTTTATGCCCAAACCCCGATTCCAGCAGTCAATTTATTTGGTACCTCCCAAGGAGCGGGAAGTCTATTCTAA  
CCCTTCTCGGGGATTTTCATCCACAAACGCAAAGTTTTATGGCTAACCGATATGGCTCATCATCATTTAGCTATTGCATTT  
ATTTTTCTCGTTGCTGGTCAATGTATAGAATAACTTCGGGATTGGGCACAGTATGAAAGATCTTTTAGAAGCACATAT  
TCCTCCCGGGGGTTCGATTGGGACGTGGGCATAAGGGTCTTTATGACACAATCAATAATTCGATTCAATTTCAATTAGGTC  
TTGCTCTAGCCTCCTTAGGGGTTATTACTTCTTGGTGTGCTCAACACATGTACTCTTTACCTGCTTATGCATTCATAGCA

CAAGACTTTACTACTCAAGCTGCATTATATACTCATCACCAATACATCGCAGGGTTCATCATGACAGGAGCCTTTGCTCA  
TGGAGCTATATTCTTTATTAGAGATTACAATCCGGAACAGAATGAGGATAATGTATTGGCTAGAATGTTAGACCATAAAG  
AGGCTATCAAATCTCATTAAAGTTGGGCCAGCCTGTTTTGGGGTTCATACCTTTGGGACTCTATGTTTATAACGACGTC  
ATGCTCGCTTTTGGTACTCCGGAGAAACAAATCTTGATCGAACCCATATTTGCCCAATGGATACAATCCGCTCATGGTAA  
GACTTCATATGGGTTTCGATGTACTTTTATCTTCAACGAATGGCCCAGCATTCAATGCTGGTTCGAAGCATATGGTTACCTG  
GCTGGTTGAATGCTGTTAATGAGAATAGTAATTCACTATTCTTAAACAATAGGTCCTGGGGACTTCTTGGTTCATCATGCT  
ATTGCTCTAGGTTTGCATACAACACTACATTGATTTTAGTAAAAGGTGCTTTAGATGCACGTGGTTCCAAGTTAATGCCAGA  
TAAAAAGGATTTCCGTTATAGTTTTCTTTCGACGGTCCAGGACGAGGCGGTACTTGTGATATTTCCGCTTTGGGACGCAT  
TTTATTTGGCAGTTTTCTGGATGTTAAATACTATTGGATGGGTTACTTTTTATTGGCATTGGAAGCACATCACATTATGG  
CAGGGTAACGTTTACAATTTAATGAATCCTCCACTATTGATGGGATGGTTAAGAGATTATCTATGGTTAAACTCTTC  
CCAATTATCAATGGATATAACCCTTTTGGTACGAATAGTTTATCGGTCTGGGCGTGGATGTTCCCTATTTGGGCACTTG  
TTTGGGCTACTGGATTTATGTTCTTAATTTCTGGCGTGGATATTGGCAGGAATTGATTGAAACTTTAGCATGGGCTCAT  
GAACGCACACCTTTGGCTAATTTGATTTCGATGGAGGGATAAACCCAGTGGCTCTTTCCATTGTGCAAGCAAGATTGGTGGG  
ATTAGCCCACTTTTCTGTAGGTTATATATTCACTTATGCAGCTTTCTTGATTGCCTCTACATCAGGCAAATTTGGT---  
ATGTCACATTACAGTAAAGATTTATGATACATGTATAGGGTGCACCCAATGTGTACGAGCCTGCCCCACAGATGTATTGGA  
AATGATACCTTTGGGACGGATGTAAAGCTAAGCAAATTGCTCCTGCTCCAAGAACAGAGGACTGTGTAGGTTGTAAGCGAT  
GTGAATCTGCTTGTCCAACAGATTTCTTGAGTGTACGGGTTTTATTTATCGAATGAGACAACCTCGCAGCATGGGTCTAGCT  
TAT---ATGACAGATCTCAAT---  
TTACCCTCTATTTTTGTGCCTTTTCGTGGGCCTAGTATTTCCGGCAATTGCAATGGCTTCTTTATCTCTTCATGTTCAAAA  
AAACAAGATTGTC---ATGCGAGATATAAAAACATATCTCTCT---  
GTGGCACCTGTGCTAGCTACTCTATGGTTCGGGTCTTTAGCAGGTCTATTGATAGAGATCAATCGTTTATTCCCAGATGC  
GTTGGCATTCCCTTTTTTC-----  
ATGACTGCAATTTTAGAGAGACGCGAAACCACAAGTTTATGGGGTTCGCTTTTGTAACTGGATAACCAGCACTGAAAACCG  
TCTTTACATTGGATGGTTCCGGTGTTTTGTATGATCCCTACCTTATTGACCGCAACTTCTGTATTTATTATCGCCTTTATTG  
CTGCTCCTCCAGTAGATATTGATGGTATTCGTGAACCTGTTTCTGGGTCTCTACTTTATGGAAACAATATTATCTCTGGT  
GCCATTATTCCTACTTCTGCCGCTATAGGTTTGCATTTTTACCCGATATGGGAAGCAGCATCCGTTGATGAATGGTTATA  
CAATGGTGGTCTTATGAGCTAATTGTTCTACACTTCTTACTTGGTGTAGCTTGTACATGGGTTCGTGAGTGGGAGCTTA  
GTTTCCGCTCTGGGTATGCGCCCTTGGATTGCTGTTGCATATTCAGCTCCTGTTGCAGCTGCTACTGTTTCTTCTGATC  
TACCCTATTGGTCAAGGAAGCTTCTCTGATGGTATGCCCCTAGGAATATCTGGTACTTTCAACTTCATGTTTGTATTCCA  
GGCTGAGCACAATATCCTTATGCATCCATTTACATGTTAGGCGTAGCTGGTGTATTCCGCGGTTCCCTATTTAGTGCTA  
TGCATGGTTCCTTGGTAACTCTAGTTTGTATCAGGGAAACCACAGAAAATGAGTCTGCTAATGCAGGTTACAGATTCCGGT  
CAAGAAGAAGAACTTATAATATCGTAGCTGCTCATGGTTATTTTTGGCCGATTGATCTTCCAATATGCTAGTTTCAACAA  
TTCTCGTTTCTTACATTTCTTCTAGCTGCTTGGCCTGTAGTAGGTTATTTGGTTCAGTCTTTAGGTATCAGCACCATGG  
CTTTCAACCTAAATGGTTTTAATTTCAACCAATCTGTAGTTGATAGTCAAGGTCGTGTCATTAACACTTTGGGCTGATATT  
ATCAATCGTGCTAACCTTGGTATGGAAGTTATGCATGAACGTAATGCTCATAACTTCCCTCTAGACCTA---  
GCTGCTGTTGAAGCTCCATCTATAAATGGA---  
ATGGGTTTGCCTTGGTATCGTGTTCATACCGTTCGATTTGAATGATCCTGGTTCGGTTGCTTTCTGTCCATATAATGCATAC  
AGCTCTAGTTTCTGGTTGGGCCGGTTCGATGGCTCTCTACGAATTAGCAGTTTTTGTATCCCTCTGACCCCGTTCCTTGTATC  
CAATGTGGAGACAAGGTATGTTTCTTATACCCTTCATGACTCGTTTAGGAATAAACAATTCATGGGGTGGTTGGAGTATC  
ACAGGAGGAACATAACAAATCCGGGTATTTGGAGTTACGAAGGTGTGGCCGGAGCACATATTGTGTTTTCTGGCTTGTG  
CTTCTTGGCAGCTATCTGGCATTGGGTGTATTGGGACCTAGAAATATTCTGCGATGAACGTACGGGAAAACCCCTCTTTGG  
ATTTGCCAAAGATCTTTGGCATTCAATTTATTTCTCTCAGGGGTGGCTTGCTTTGGGTTTGGCGCATTTTCATGTAACAGGC  
TTATATGGTCTTGGCATATGGGTATCCGATCCTTATGGACTAACCCGAAAAGTACAATCTGTAAATCCAGCGTGGGGCGC  
GGAAGTTTTGATCCTTTTGTTCGGGAGGAATAGCCTCTCATCATATTGCAGCGGGGACATTGGGCATATTAGCGGGCC  
TATTCATCTTAGTGTCCGCCCCGCCAACGCCTATACAAAGGATTACGTATGGGCAATATTGAAACTGTCTTTCTAGT  
AGTATCGTGTCTCTTTTTTGCAGCTTTCGTTGTTGCTGGAACATATGTGGTATGGTTCAGCAACTACCCCGATCGAATT  
ATTTGGTCCCCTCGTTTATCAGTGGGATCAGGGATACTTCCAGCAAGAAATATATCGAAGAGTTGGCACCCGGGCTATCCG  
AAAATCAGAGTTTATCGGAAGCTTGGTCTAAAATTTCCCGAAAAATTAGCTTTTTTATGATTACATCGGTAATAATCCGGCG  
AAGGGGGGATTATTACAGAGCGGGCCAATGGACAACGGGGATGGAATAGCTGTTGGATGGTTAGGACACCCAATCTTTAG  
AGATAAAGAAGGGCATGAGCTTTTTGTGCGTCTGATGCCACTTTTTTGAACATTTCCAGTGGTTTTGGTATAGTGGAG  
ACGGAATTGTGAGAGCCGATGTTCTTTTAGAAGGGCAGAATCGAAGTACAGTGTGCAACAAGTAGGTGTAACCTGTTGAG  
TTCTATGGTGGCGAACTCAATGGAGTCAGTTATAGTATCCTGCTACTGTGAAAAAATATGCTAGACGTGCCCAATTGGG  
TGAAATTTTTGAATTAGATCGTGTACTTTGAAATCCGATGGTGTTTTTCTGTAGCAGTCCAAGGGGTTGGTTCACTTTTG  
GGCATGCTACGTTTGTCTTCTTTTTTTCGGACACATTTGGCATGGCGCTAGAACTTTGTTTCAGAGATGTTTTTGTCT  
GGTATTGACCCAGATTTGGATGCTCAAGTGAATTTGGAACATTCCAAAA---  
CTTGGAGATCCAACACTACAAGGAGACAAGTA---GTC-----  
ATGAAAACCTTATATTCCCTGAGGAGGTTCTACCACGTGGAACGCTCTTTAATGGAACCTTTAGCTTTAGCTGGTTCGTGA



CCAAGAAACCACAGGTTTTGCTTGGTGGGCCGGGAATGCCCGACTTATCAATTTGTCAGGTAAACTACTCGGGGCTCAGC  
TAGCCCATGCCGATTAATCGTATTCTGGGCCGGAGCAATGAACCTATTTGAAGTGGCTCATTTTCGTACCAGAGAAGCCG  
ATGTATGAACAGGGATTGATTTTACTTCCCCATCTAGCTAC  
Citrus GTCGCTATTCTGGATCC---  
AGGGGGGAGTATGTTTCGATGGAATAATTTCTTAGATGTATTGCCGCATCCCCAAGGGTTAGGCCCACTTTTTACGGGTCA  
GTGGAATCTTTATGCGCAAAACCCCGATTCAAGTAGTCATTTATTTGGTACCTCCCAAGGATCAGGAACTGCCATTCTAA  
CCCTTCTCGGGGATTCCATCCCAAACGCAAAGCTTATGGCTGACCGATATTGCTCATCATCATTTAGCTATTGCATTT  
ATTTTTCTCGTTGCTGGTCATATGTATAGAACGAATTTCCGGATTGGGCACAGTATAAAAAGATCTTTTAGAAGCACATAT  
TCCTCCGGGAGGACGCTTGGGGCGCGGGCATAAAGGTCTTTATGACACAATCAATAATTCGCTTCATTTTCAATTAGGCC  
TTGCTCTAGCCTCTTTAGGGGTTATTACTTCCCTGGTAGCTCAACACATGTACTCTTTACCTGCTTATGCATTCATAGCG  
CAAGATTTTACTACTCAAGCTGCGTTATATACTCATCACAATACATCGCGGATTTCATCATGACAGGAGCTTTTGTCTCA  
CGGAGCTATCTTTTTTATTAGAGATTACAATCCGGAACAGAATGAGGATAATGTATTGGCAAGAATGTTAGACCATAAGG  
AAGCTATTATATCCATTTAAGTTGGGCCAGCTTGTCTGGGGTCCATACTTTGGGACTTTATGTTTATAATGATGTC  
ATGCTTGCTTTTGGTACTCCGGAGAAACAAATCTTGATCGAACCAGATATTTGCCCAATGGATACAATCTGCTCATGGTAA  
AACTTCATATGGATTGATGACTTTTATCTTCAACGGATGGCCCTGCATTCAATGCGGGTTCGAAGCATATGGTTGCCTG  
GCTGGTTAAGTGTGTTAATGAGAATAGTAATTCTCTATTCTTAAACAATAGGCCCTGGAGACTTTTTGGTTCATCATGCT  
ATTGCTCTAGGTTTACATACAACACTACATTGATCTTGGTAAAGGGGGCTTTAGATGCACGGGGTCTAAGTTAATGCCAGA  
TAAAAGGATTTCCGTTATAGTTTTCTTGGCAGCGTCCGGGACGAGGCGGTACTTGTGATATTTCCGGCTTGGGACGCAT  
TTTTTTGGCAGTTTTCTGGATGTTAAATACCATTGGGTGGGTTACTTTTTATTGGCATTGGAATCACATCACGTTATGG  
CAGGGTAACGTTTTACAGTTTTAATGAATCTTCCACTTATTTGATGGGATGGTTAAGAGATTATCTATGGTTAAACTCTTC  
CCAATTATCAATGGGTATAACCCGTTTGGTATGAATAGTTTATCAGTCTGGGCGTGGATGTTCTTATTTGGACATCTTG  
TTTGGGCTACTGGATTTATGTTTTAATTTCCCTGGCGCGGGTATTGGCAAGAATTGATTGAAACTTTAGCGTGGGCTCAC  
GAACGCACACCCTTAGCTAATTTGATTGATGGAGAGATAAACCAGTGGCCCTTTCCATTGTGCAAGCACGATTGGTTGG  
ATTAGCCCACTTCTCTGTAGGTTATATATTTCACTTATGCGGCTTTCTTGATTGCCTCTACATCGGGCAAATTTGGT---  
ATGTCACATTACAGTAAAGATTTATGATACATGTATAGGGTGTACTCAATGTGTACGAGCTTGCCCCACGGATGTATTAGA  
AATGATACCTTGGGACGGATGTAAAGCAAAGCAAATTTGCTTCTGCTCCAAGAACAGAGGACTGTGTTGGTTGTAAGCGAT  
GTGAATCCGCCTGTCCAACGGATTTCTTGAGTGTTCGAGTTTATTTATGGCATGAAACAACCCGAAGCATGGGTCTAGCT  
TAT---  
ATGACAATTCTCAACAGCTTTCCCTCTATTTTTGTGCCTTTAGTGGGCCTAGTATTTCCGGCAATGGCAATGGCTTCGTT  
ATTTCTTTATCTTGAAAAAATAAGATTTG---ATGCGAGATCTAAAAACATATCTTTCC---  
GTGGCACCGGTACTAAGTACTCTATGGTTCGGGTCTTTAGCAGGGTTATTGATAGAAATCAACCGTTTATTCCCCGACGC  
ATTGACATTTCTTTTTTTTTTTCATTC---  
ATGACTGCAATTTTAGAGAGACGCGAAAGCGAACGCCTATGGGGTTCGCTTCTGTAAGTGGATAACTAGCACTGAAAACCG  
CCTTTACATTGGTTGGTTTGGTGTTTTGGTGTATCCCTACTTTATTGACCGCAACTTCTGTATTTATTATCGCCTTCATTG  
CTGCTCCTCCAGTAGATATTGACGGTATTCGTGAACCTGTTTCTGGATCTCTACTTTATGGAAACAATATTATTTCTGGT  
GCGATTATTCCTACTTCTGCAGCTATAGGTTTGCATTTTTACCCGATATGGGAAGCGGCATCCGTTGATGAATGGTTATA  
CAATGGCGGTCTTATGAGCTAATTGTTCTACACTTCTTACTTGGTGTAGCTTGTACATGGGTCTGTGAGTGGGAACCTA  
GTTTCCGTCTGGGTATGCGTCTTGGATTGCTGTTGCATATTCAGCTCCTGTTGCAGCAGCGACTGCTGTTTTCTTGATC  
TACCAATCGGTCAAGGAAGTTTTTCTGATGGTATGCCTCTAGGAATCTCTGGTACTTTCAATTTTATGATTGTATTCCA  
GGCTGAGCACAACATCCTTATGCACCCATTCCACATGTTAGGCGTAGCTGGTGTATTTCGGCGGCTCCCTATTACAGTGCTA  
TGCATGGTTCCTTGGTAACCTCTAGTTTATGATCAGGGAAACCACAGAAAATGAATCTGCTAATGCAGGTTACAGATTCCGT  
CAAGAGGAAGAACTTATAATATCGTAGCTGCTCACGGTTATTTTGGCCGATTGATCTTCCAATATGCTAGTTTCAACAA  
TTCTCGTTCTTTACATTTCTTCCCTGGCTGCTTGGCCTGTAGTAGGTATCTGGTTCACTGCTTTAGGTATTAGCACTATGG  
CTTTCAACTTAAATGGTTTTCAATTTCAACCAATCTGTAGTTGATAGTCAAGGTCGTGTAATTAATACCTGGGCTGATATT  
ATTAATCGTGCTAACCTTGGTATGGAAGTTATGCATGAACGTAATGCTCATAACTTCCCTCTAGACCTA---  
GCTGCTATTGAAGCCCCATCTACAAATGGG---  
ATGGGTTTGCCTTGGTATCGTGTTCATACCGTCTGATTGAATGATCCCGGTCGTTTGGATTGCTGTCCATATAATGCATAC  
AGCCCTGGTTGCGGGTTGGGCCGGTTCAATGGCTCTATATGAATTAGCTGTTTTTGGATCCCTCCGATCCAGTTCTTGATC  
CAATGTGGAGACAAGGCATGTTTGGTTATACCCTTCATGACTCGTTTAGGAATAACCGATTTCATGGGGTGGTTGGAGTATT  
ACAGGGGGGACAGTAACGAATCCGGGTATTTGGAGTTACGAAGGTGTAGCGGGGGCACATATTGTGTTTTCCGGATTGTG  
CTTCTTGGCAGCTATCTGGCATTGGGTGTATTGGGATCTAGCAATATTTGTTGATGACCGTACAGGAAAACGTTCTTTGG  
ATTTGCCTAAAATCTTTGGAATTCATTTATTTCTCTCAGGAGTGGCTTGCTTTGGTTTTGGGACATTTTCATGTAACAGGA  
TTGTATGGTCTTGAATATGGGTGTCTGATCCGTATGGACTAACTGGAAAGGTACAATCTGTAAATCCAGCATGGGGTGT  
GGAAGGTTTTGATCCTTTTTGTTCCAGGAGGAATAGCCTCTCATCATATTGCGGCAGGGACATTGGGCATATTAGCAGGCT  
TATTCATCTCAGTGTCCGCCGCCACAACGCTTATACAAAGGATTACGTATGGGCAATATTGAAACCGTTCTTTCCAGC  
AGCATCGCTGCTGCTTTTTTGCAGCGTTTTGTTGTTGCTGGAACCTATGTGGTATGGGTGAGCAACTACCCCATCGAATT  
ATTTGGTCCCACCCGTTATCAATGGGATCAGGGATACTTTCAGCAAGAAATATATCGAAGAGTCAGTGTGGACTAGCCG

AAAATCAAAGTTTATCAGAAGCTTGGTCTAAAATTCCTGAAAAATTAGCTTTTTATGATTACATCGGAAATAATCCTGCG  
AAAGGGGGATTATTAGAGCGGGTTCAATGGATAACGGGGATGGAATAGCTGTCGGGTGGTTAGGACACCCTATATTTAG  
AGATAAAGAAGGGCGTGAACCTTTTTGTACGTCGTATGCCTACTTTTTTTGAAACATTTCCAGTTGTTTTGGTAGACGGAG  
ATGGAATTGTTAGAGCCGACGTTCCCTTTTCGAAGGGCAGAATCGAAGTATAGTGTGCAACAAGTAGGTGTAACCGTTGAG  
TTCTATGGTGGCGAGCTGAATGGCGTGAGTTATAGTGATCCTGCTACTGTGAAAAAATATGCTAGACGTGCTCAATTGGG  
TGAAATTTTTGAATTAGATCGTGCTACTTTGAAATCCGATGGTGTTTTTTCGTAGCAGCCCAAGGGGCTGGTTTTACGTTTG  
GACACGCTTCATTTGCTCTGCTTTTTCTTCTCGGACACATTTGGCATGGTGTGCTAGAACCTTGTTTCAGAGATGTTTTGCT  
GGTATTGACCCGGATTGGACGCTCAAGTGGAAATTTGGAGTATTCAAAA---  
CTTGGAGATCCAACATAAGAAGACAAGTA---GTC-----  
ATGAAAACCTTATATCCCTGAGGAGGTTCTACCCCGTGGAAACGCTCTTTAATGGAACCTTAGCTGTAGCAGGTGCTGA  
CCAAGAAACCACCGGTTTTGCTTGGTGGGCGGGGAATGCCGACTTATCAATTTATCCGGTAAACTGCTGGGCGCTCATG  
TAGCCCATGCTGGATTAATCGTATTCTGGGCGGAGCAATGAACCTATTTGAAGTGGCTCATTTTCGTACCAGAAAAGCCC  
ATGTATGAACAAGGATTAATTTTACTTCCCCACTAGCTAC  
Coffea GTCGCTATTCTGGATCC---  
AGAGGTGAATATGTTTCGATGGAATAATTTCTTAGATGTATTACCGCATCCCCAAGGGTTAGGTCCACTTTTTACAGGTCA  
GTGGAATCTTTATGCTCAAAACCCCGATTAGGTAGTCATTTATTTGGGACCTCTCAAGGAGCAGGAACCTGCCATTCTAA  
CGCTTCTCGGGGATTTCATCCGCAAACACAAAGTTTTATGGCTGACTGATATTGCCCATCATCATTTAGCTATTGCATTT  
ATTTTTCTCGTTGCTGGTCATATGTATAGAATAATTTCCGGATTGGGCACAGTATGAAAGACCTTTTAGATGCACATAT  
TCCTCCGGGGGACGATTGGGACGTGGACATAAGGGTCTTTATGATACAATCAATAATTCGCTTCATTTTCAATTAGGCC  
TTGCTCTAGCTTCTTTAGGTGTTATTACTTCTTGGTAGCTCAACACATGTACTCTTTACCTGCTTATGCATTATAGCA  
CAAGACTTTACTACTCAAGCTGCATTATATACTCATCACAATATATTGCAGGATTCATCATGACAGGAGCTTTTGCCCA  
TGGAGCTATATTTTTTATTAGAGATTACAATCCAGAACAATGAAGACAATGTATTGGCAAGAATGTTAGACCATAAAG  
AAGCTATTATATCTCATTTAAGTTGGGCCAGCCTCTTTCTGGGATTCCATACTTTAGGACTTTATGTTTATAATGATGTC  
ATGCTTGCCCTTTGGCACCCCGGAGAAGCAAATCCTGATCGAACCTATATTTGCTCAATGGATACAATCTGCTCATGGTAA  
AACTTCATATGGGTTTATGATGACTTTTATCTTCAACGAGCGGACCAGCATTCAATGCGGGTTCGAAGCATCTGGTTGCCGG  
GTTGGTTAAATGCTGTAAATGAAAATAGTAATTCATTATTCTTAAACAATAGGTCTGGAGACTTTTTGGTTTCATCATGCT  
ATTGCTTTAGGTTTACATACAACTACATTGATCCTAGTAAAAGGTGCTTTAGATGCACGTGGGTCCAAGTTAATGCCAGA  
TAAAAGGATTTCCGTTATAGTTTTCCGTGCGACGGTCCAGGACGGGGCGGCACCTGCGATATTTCCGGCATGGGACGCAT  
TTTTATTAGCGTTTTTTGGATGTTAAATACTATTGGATGGGTACTTTTTTATTGGCATTGAAAGCACATCATTATGG  
CAGGTTAACGTTTTACAATTAATGAATCTTCCACCTATTTGATGGGCTGGTTAAGAGATTATTTATGGTTAAACTCTTC  
ACAACCTATTAATGGCTATAACCCCTTTGGTATGAATAGTTTTATCGGTCTGGGCATGGATGTTCTTATTTGGACATCTTG  
TTTTGGGCTATTGGATTTATGTTCTTAATTTCTGGCGTGGGTATTGGCAGGAATTGATTGAAACTTTAGCTTGGGCTCAT  
GAACGCACACCTTTAGCCAATTTGATTGTTGGAGAGATAAACCCGTAGCCCTTTCCATTGTGCAAGCAAGATTGGTTGG  
ACTAGCCCACTTTTCTGTAGGTTATATATTTACGTATGCGGCTTTCTTAATTGCCTCTACGTGGGCAAATTTGGT---  
ATGTCACATTAGTAAAGATTTATGATACGTGTATAGGATGTACTCAATGTGTCCGAGCTTGCCCCACCGATGTATTAGA  
AATGATACCTTTGGGACGGATGTAAAGCTAAACAAATGCTTCTGCTCCAAGAACCAGACTGCGTTGGTTGTAAGAT  
GTGAATCCGCTGTCCAACGGATTTCTTGAGTGTTCGAGTTATTTATGGCATGAAACAACCCGCAGTATGGGTCTAGCT  
TAT---ATGATAACTTTTCAGC---  
TTTCCCTCTATTTTTGTGCCTTTAGTAGGCCTAGTATTTCCGGCAATTGCAATGGCTTCTTTATCTCTTCATGTTCAAAA  
AAATAAGATTATT---ATGCGAGATTTTAAAACATATCTCTCC---  
GTGGCACCAAGTACTAAGTACACTATGGTTCGGGGCTTTGGCAGGTCTATTGATAGAGATTAATCGTTTTTTTTCCGGATGC  
GTTGACCTTCCCCTTTTTTTTCATTC---  
ATGACTGCAATTTTAGAGAGACGCGAAAGCGAAAGCCTATGGGGTCGCTTCTGTAATTGGATAACCAGCACTGAAAACCG  
TCTTTACATTGGATGGTTTTGGTGTTTTATGATGATCCCTACCTTATTGACCGCAACTTCCGTATTTATTATCGCCTTCATTG  
CTGCACCTCCAGTAGATATTGATGGTATTCGTGAACCTGTTTCTGGATCTTTACTTTACGGAAACAATATTTTTCAGGT  
GCCATTTCTACTTCTGCAGCTATAGGTTGCACTTTTTACCAATATGGGAAGCGGCGTCTGTTGATGAATGGTTATA  
TAACGGCGGTCCTTATGAACATAATTGTTCTACACTTTTTACTTGGTGTAGCTTGTACATGGGTGCTGAGTGGGAGCTTA  
GTTTTCCGTCTGGGTATGCGACCTTGATTGCTGTGTCATATTAGCTCCTGTTGCAGCTGCTACCCTGTTTTCTTGATT  
TATCCAATCGGTCAAGGAAGTTTTTCTGATGGTATGCCTCTAGGAATCTCTGGTACTTTCAACTTCATGATTGATTCCA  
AGCTGAGCACAACATCCTTATGCACCCATTTACATGTTAGGCGTAGCTGGTGTATTTCGGCGGCTCCCTATTCAGTGCTA  
TGCATGGTTCCTTGGTAACTTCTAGTTTATGATCAGGGAAACCACAGAAAATGAATCTGCTAACGCAGGTTACAGATTTGGT  
CAAGAGGAAGAACTTATAATATCGTAGCTGCTCATGGTTATTTTGGCCGATTGATCTTCCAATATGCTAGTTTCAACAA  
CTCTCGTTTATTACACTTCTTCTAGCTGCTTGGCCTGTAGTAGGTATCTGGTTTACATCTTTAGGTATTAGCACTATGG  
CTTTCAACCTAAACGGGTTTTAATTTCAACCAATCTGTAGTTGATAGTCAAGGTCGTGTAATTAATACTTGGGCGGATATC  
ATTAACCGCGCTAACCTTGGTATGGAAGTTATGCATGAACGTAATGCTCATAACTTCCCTCTAGACCTA---  
GCTGCTATAGATGCTCCATCTGTAAATGGA---  
ATGGGTTTGCCTTGGTATCGCGTTCATACTGTTGTATTGAATGATCCCGGCCGCTTGCTTTCTGTTTATATAATGCATAC

AGCTCTGGTTGCTGGTTGGGCTGGTTTCGATGGCTCTATATGAATTAGCAGTTTTTGGATCCTTCCGATCCTGTTCTTGATC  
CAATGTGGAGACAGGGTATGTTTTGTTATACCCTTTATGACTCGTTTAGGAATTACCAATTCATGGGGCGGTTGGAGTATC  
ACAGGGGGAACTGTAACGAATGCGGGTATTTGGAGTTACGAAGGTGTAGCGGGGCACATATTGTGTTTTCTGGTTTTATG  
CTTTTTGGCAGCCATCTGGCATTGGGTATATTGGGATCTAGAAATATTTTGGCGATGAACGTACAGGAAAACCTTCTTTGG  
ATTTGCCCAAGATCTTTGGAATTCATTTATTTCTTTTCAGGAGTGGCTTGCTTTGGTTTTGGTGCATTTTCATGTAACAGGC  
TTATATGGTCTCGAATATGGGTGTCCGATCCTTATGGACTAACGGGCAAAGTACAACCCGTAAATCCGGCATGGGGCGT  
GGAAGTTTTGATCCTTTTGTTCGGGAGGAATAGCCTCTCATCATTGCAGCAGGGACATTGGGCATATTAGCGGGGT  
TATCCATCTTAGCGTCCGCCCACCACAACGCCTATAACAAGGGATTGCGTATGGGAAATATTGAAACCGTCTTTCCAGT  
AGTATCGCTGCTGTCTTTTTTGGCGCTTTTGTGTTGCCGGAATATGTGGTATGGTTCAGCAACTACTCCGATCGAATT  
ATTTGGGCCCCTCGTTATCAATGGGATCAGGGTACTTTTCAGCAAGAGATATATCGAAGAGTTAGTGTGGACTAGCAG  
AAAATCAAAGTTTTATCAGAAGCCTGGTCTAAAATTTCTGAAAAATTAGCTTTTTTATGATTACATCGGAAATAATCCGGCA  
AAAGGGGATTATTTCAGGGCAGGTTTCGATGGATAACGGGGATGGAATAGCGATTGGATGGTTGGGACACCCCTATCTTTAG  
AGATAAAGAAGGGCGGGAACTTTTTGTACGTGCTATGCCTACTTTTTTTGAAACATTTCCAGTCGTTTTTGGTAGACGGCG  
ACGGAATTGTTAGAGCGGATGTTCTTTTAGAAGGGCAGAATCAAAGTATAGTGTGAACAAGTAGGTGTAAGTGTGAA  
TTCTACGGCGGTGAACTCAATGGAGTCAGTTATAGCGATCCTGCTACTGTGAAAAATATGCTAGGCGCGCTCAATTGGG  
TGAAATTTTTGAATTAGATCGTGCTACTTTGAAATCCGATGGTGTTTTTTCGTAGCAGTCCAAGGGGTTGGTTTTACTTTTG  
GACATGCTTCATTTGCTTTGCTCTTCTTTTTTCGGACACATTTGGCATGGTGTAGAACCTTGTTCAGAGATGTTTTTGTCT  
GGTATTGACCCGGATTTGGATGCTCAAGTCGAATTTGGAGCATTCCAAAAA---  
ATTGGGGATCCAATAACAAGAAGACAGGCA---GTC-----  
ATGAAAACCTTATATCCCTGAGGAGGTTCTACCACGTGGAAACGCTCTTTAATGGAACCTTTAGCTTTAGCTGGTCTGTA  
CCAAGAAACCACCGGTTTCGCTTGGTGGGCGGGAAATGCCCGACTTATCAATTTATCCGGTAAACTACTAGGAGCTCATG  
TAGCCCATGCTGGGTTAATCGTATTCTGGGCCGGAGCAATGAACCTATTTGAAGTGGCTCATTTTCGTACCAGAGAAGCCT  
ATGTATGAACAAGGGTTAATCTTACTTCCCCACCTAGCTAC  
Cucumis           GTGCTATTCCCTGCATCC---  
AGGGGAGAATCTGTTTCGATGGAATAATTTCTTAGATGTATTGCCACATCCCCAAGGATTAGGACCCTTTTTACAGGTCA  
GTGGAATCTTTATGCTCAAAACCCCGATTCAAATAATCATTTATTTGGTACTTCCGAAGGAGCAGGAACTGCCATTCTAA  
CCCTTCTCGGGGATTCCATCCGCAAACCCAAAGTTTATGGCTGACTGATATGGCTCATCATCATTTAGCTATTGCATTT  
ATTTTCTTGTGTGTTGTTGATGATGATAAGAACTACTCGGGATTGGACACAGTATAAAAAGATCTTTTAGAAGCACATAT  
TCCACCGGGGAGCAGATTGGGGCGTGGACATAAAGGTCTTTATGACACAATTAATAATTCGCTTCATTTCAATTAGGTC  
TTGCTTTAGCCTCTTTAGGGGTTATTACTTCTTTGGTAGCTCAACACATGTACGCTTTACCTGCTTATTGCGTTTCATAGCA  
CAAGACTTTACTACTCAAGCTGCGTTATATACCCATCACCATAACATAGCAGGATTATTATGACAGGAGCTTTTGTCTCA  
TGGAGCTATATTTTTTATTAGAGATTACAATCCAGAACAGAATGAGGATAATGTATTGGCAAGAATGTTAGACCATAAAG  
AAGCTATCATATCCCATTTAAGTTGGGCCAGCCTTTTTCTGGGGTTCCATACTTTGGGGCTTTATGTTTATAATGATGTC  
ATGCTTGCTTTTGGTACTCCGAAAAACAATCTTAATCGAACCATATTTGCCCAATGGATTCAATCCGCTCATGGTAA  
AACTTCATATGGCTTCGATGTACTTTTATCTTCAACAAGCGGCCCGGCTTCAATGCGGGTTCGAAGCATATGGTTGCCAG  
GTTGGTTAAATGCTGTTAATGAGAATAGTAATTCATCTTAAACAATAGGGCCCGGAGACTTCTTGGTTCATCATGCT  
ATTGCTTTAGGTTTACATACAACTACATTGATCTTAGTAAAAGGTGCTTTAGATGCACGTGGTTCCAAATTAATGCCGGA  
TAAAAGGATTTTGGTTATAGTTTTCTTGCAGCGTCCGGGACGAGGTGGTACTTTGTGATATTTCCGCTTGGGACGCT  
TTTTTTGGCAGTTTTCTGGATGTTAAATACCATTGGATGGGTTACTTTTTATTGGCACTGGAAGCACATCACATTATGG  
CAGGGTAACGTTTTCAGTTTTAATGAATCTTCCACTTATTTGATGGGATGGTTAAGAGATTATCTATGGTTAAACTCTTC  
ACAACCTTATCAATGGATATAATCCTTTTTGGTATGAATAGTTTATCAGTCTGGGCGTGGATGTTCTTATTTGGACATCTTG  
TTTGGGCTACTGGCTTTATGTTCTTAATTTCCCTGGCGCGGATATTGGCAAGAATTGATTGAAACTTTAGCATGGGCTCAC  
GAACGTACACCTTTGGCTAATTTGATTTCGATGGAGAGATAAACCAGTGGCTCTTTCCATTGTGCAAGCAAGATTAGTTGG  
ATTAGCCACTTTTCTGTAGGTTATATATTTACTTATGCGGCTTTCTTGATTGCCTCTACATCAGGTAATTTGGT---  
ATGTCACATTCAGTAAAGATTTATGATACATGTATAGGGTGTACTCAATGTGTCCGAGCTTGCCCCACAGATGTATTAGA  
AATGATACCTTGGGGCGGATGTAAAGCTAAGCAAATAGCTTCGGCTCCACGAACGGAAGACTGTGTTGGTTGTAAGAGAT  
GTGAATCTGCCTGTCCGACGGATTTCTTGAGTGTTCGCGTTTTATTTATGGCATGAAACAACCTCGAAGCATGGGTCTAGCT  
TAT---  
ATGACAACCTCTACCACCTTACCCTCTATTTTTGTGCCTTTAGTGGGCTTAGTATTTCCGGCAATTGCAATGGCTTCTTT  
ATTTCTTCATGTTCAAAAAACAAGATTTTT---ATGCGAGATCTAAAAACAT-TCTCTCCC--  
GTGGCACCGGTAGTAAGTACTATATGGTCCGGC--  
TTTAGCGGGTCTATTAATCGAGATCAATCGTTTTATTCCCGGATGCGTGGGAATCCCCATTTTTTCCATCC---  
ATGACTGCAATTTTAGAGAGACGCGAAAGCGAAAGCCTATGGGGTCTGTTTCTGTAAGTGGATAACCAGCACTGAAAACCG  
TCTTTACATTGGATGGTTTTGGTGTTTTTGATGATCCCTACCTTATTGACCGCAACTTCTGTATTTATTATTGCCTTCATTG  
CTGCTCCTCCAGTGGATATTGATGGTATTCGTGAACCTGTTTCTGGATCTCTACTTTACGGAACAATATTATTTCTGGT  
GCTATTATCCCTACCTCTGCAGCTATCGGTTTGCATTTTACCCAATTTGGGAAGCTGCTTCCGTTGATGAATGGTTATA  
CAACGGTGGTCTTATGAGCTAATTGTTCTACACTTCTTACTTGGTGTAGCATGTTACATGGGTGAGAGTGGGAACCTTA

GTTTCCGTCTGGGTATGCGTCCTTGGATTGCTGTTGCATATTCAGCTCCTGTTGCAGCAGCTACTGCTGTTTTCTTGATT  
TACCCAATTGGTCAAGGAAGCTTTTTCTGACGGTATGCCTCTAGGAATCTCTGGTACTTTCAACTTCATGATTGTATTCCA  
GGCTGAGCACAACATCCTTATGCACCCATTCCACATGTTAGGTGTAGCTGGTGTATTTCGGCGGCTCCCTATTAGTGCTA  
TGCATGGTTCCTTGGTAACTTCTAAGTTGATCAGGGAAACCACAGAAAATGAATCTGCTAATGAAGGTTACAGATTCCGGT  
CAAGAGGAAGAACTTATAATATCGTAGCTGCTCATGGTTATTTTGGCCGATTGATCTTCCAATATGCTAGTTTCAACAA  
CTCTCGTTCTTTACATTTCTTCCCTAGCTGCTTGGCCTGTAGTAGGTATCTGGTCCACCGCTTTAGGTATTAGCACTATGG  
CTTTCAACTTAAATGGTTTTCAATTTCAACCAATCTGTAGTTGATAGTCAAGGTCGTGTAATTAATACCTGGGCTGATATT  
ATTAACCGTGCTAATCTTGGTATGGAAGTTATGCATGAACGTAATGCTCACAACCTCCCTCTAGACCTA---

GCTGCTGTTGAAGTTCATCTATCAATGGA---

ATGGGTTTGCCTTGGTATCGTGTTCATACCGTGTGATTGAATGATCCCGGTCGTTTGCTTTCTGTTTCATATAATGCAAAC  
AGCTCTAGTTGCTGGTTGGGCGGTTCAATGGCCCTATACGAATTAGCAGTTTTTGTATCCCTCTGATCCTGTTCTTGATC  
CAATGTGGAGACAAGGTATGTTCTGTTATACCCCTCCATGACTCGTTTAGGAATAACCAATTCATGGGGAGGTTGGAGTATC  
ACAGGAGGGATTATAACGAATCCGGGTATTTGGAGTTACGAAGGTGTGGCCGGAGCACATATTTTGTCTTGGATTGTG  
CTTCTTAGCAGCTATCTGGCATTGGGTGATTGGGATCTAGAAATATTTTCTGATGAACGTACAGGAAAACCTTCTTTGG  
ATTTGCCGAAGATTTTGGAAATTCATTTATTTCTCTCAGGGTTGGGTTGTTTTGGTTTTGGTGCATTTTCATGTAACCGGA  
TTGTACGGTCCGGGAATATGGGTATCCGATCCTTATGGATTAACCGGAAGGGTACAAGCCGTAAATCCTGCGTGGGGTGT  
CGAAGGGTTTGTATCCTTTTGTTCGGGCGGAATAGCCTCGCATCATATTGCAGCAGGTACATTGGGTATATTAGCGGGCC  
TATTCATCTTAGTGTTCGTCGCCCAACGTCTATACAAAGGATTACGTATGGGAAATATTGAAACCGTCTTTTCGAGT  
AGTATCGCTGCTGTATTTTTTGCAGCTTTTGTGTTGCTGGAACATATGTGGTATGGTTCAGCAACTACCCCGATTGAATT  
ATTTGGGCCCCTCGTTATCAATGGGATCAGGGATACTTCCAGCAAGAAATATATCGAAGAGTTAGTACCGGGTTAGCCG  
AAAATCAAAGTTTATCAGAAGCTTGGTCTAAAATTCCTGAAAAATTAGCTTTTTATGATTATATCGGGAATAATCCCGCA  
AAAGGTGGATTATTAGAGCGGGTCCATGGACAACGGGGATGGAATAGCTGTTGGTTGGTTAGGACACCCTGTTTTTAG  
AGATAAAGAAGGGCGCGAACTTTTTGTACGCCGTATGCCGACCTTTTTTGAACATTTCCGGTTGTTTTGGTAGACGGAG  
ATGGAATTGTTAGAGCCGATGTTCCCTTTTGAAGAGCAGAATCGAAGTATAGTGTGAACAGGTCCGGTGAACCTGTTGAG  
TTCTATGGCGGTGAACTCAATGGAGTCAGTTATAGTGATCCTGCTACTGTGAAAAATATGCTAGACGTGCTCAATTGGG  
TGAAATTTTTGAATTAGATCGTGCTACTTTGAAATCCGATGGGGTTTTTTCGTAGCAGTCCAAGGGGTTGGTTTTACTTTTG  
GGCATGCTTCCCTTTGCTTTGCTCTTCTTCTCGGACACATTTGGCATGGTGCAGAGAACGTTGTTTCAGAGATGTCTTTGCT  
GGGATTGACCCAGATTTGGACACTCAAGTAGAATTTGGGGCATTCCAGAAAA--CTTGGAGATCCAACACAAAAAGA--  
-GTC-TAGTC-----

GTGGAACCGCTCTTTAATGGAACCTTTAGCTTTAGCTGGTTCGTGACCAAGAAACCACCGGTTTCGTTGGTGGGCGGGAA  
TGCCCCACTTATCAATTTATCCGGTAAACTACTGGGGGCTCATGTAGCCCATGCCGATTAATCGTATTCTGGGCCGGAG  
CAATGAACCTATTGGAAGTGGCTCATTTCGTACCGGAGAAGCACATGTACGAACAAGGATTAATTTTACTTCCCCACCTA  
GCTAC

Daucus GTGGCTATTCTGCATCT---

AGAGGGGAGTACGTTTCGATGGAATAATTTATTAGATGTATTACCACACCCCCAAGGGTTAGGCCCGCTTTTTACAGGCCA  
GTGGAATCTTTATGCTCAAAACCCCGACTCAAGTAGTCATTTATTTGGTACCTCCCAAGGAGCAGGAACTGCCATTCTAA  
CCCTTCTCGGGGATTTTCATCCACAACCGAAAGTTTATGGCTGACTGATATGGCTCATCATCATTTAGCTATTGCATTT  
ATTTTTCTTGTGGCCGGTCATATGTATAGAATAACTTCGGTATTGGACACAGTATGAAAGATCTTTTAGATGCACATAT  
TCCTCCGGGGGGGCGATTGGGACGTGGGCATAAGGGTCTTTATGACACAATCAATAATTCCTTTCATTTTCAATTAGGCC  
TTGCTCTAGCCTCTTTAGGGGTTATTACTTCTTGGTAGCTCAACACATGACTCTTTACCCGCTTATGCATTATAGCA  
CAAGACTTTACTACTCAAGCTGCGTTATATACTCATACCAATACATCGCAGGATTCATCATGACAGGAGCTTTTGCTCA  
TGGAGCTATATTTTTTATTAGAGATTACAGTCCGGAACAGAACGAGGATAATGTATTAGCAAGAATGTTAGACCATAAAG  
AAGCTATCATATCTCATTAAAGTTGGGCTAGCCTCTTTCTGGGGTTCCATACCTTGGGACTTTATGTTTCATAATGATGTT  
ATGCTTGCCTTTGGTACTCCGGAGAAACAAATCTTGATCGAACCTATATTTGCTCAATGGATACAATCCGCTCATGGTAA  
AACTTCATATGGTTTTGATGTACTTTTATCTTCAACAAATGGCCCGGCATTCAATGCGGGTTCGAAGCATATGGTTGCCCG  
GTTGGTTAAATGCTGTTAATGAGACTAGTAATTCATATTTCTTAAACAATAGGCCCGGAGACTTTTTAGTTTCATCATGCT  
ATTGCTCTGGGTTTACATAACAACACTACATTGATCTTAGTAAAGGGTGTCTTTAGATGCACGCGGTTCCAAATTAATGCCGGA  
TAAAAAAGATTTTCGGTTATAGTTTTCCGTGCGATGGCCCGGACGGGGCGGTACTTGTGATATTTCCGCTTGGGACGCGT  
TTTTTTTGGCAGTTTTTTGGATGTTAAATACTATCGGATGGGTTACTTTTTATTGGCATTGGAAGCATATCACATTATGG  
CAGGGTAACGTTTTCGCAGTTTAAACGAATCTTCCACTTATTTGATGGGCTGGTTAAGAGATTATTTATGGTTAAACTCTTC  
ACAACCTTATCAATGGATATAACCCTTTTGGTATGAATAGTTTATCGGTCTGGGCGTGGATGTTCTTATTTGGACATCTCG  
TTTGGGCTACTGGATTTATGTTCTTAATTTTCTGGCGTGGCTATTGGCAAGAATTGATTGAAACTTTAGCATGGGCTCAT  
GAACGCACACCTTTGGCCAATTTGATTGCTTGGAGAGATAAACCGGTGGCCCTTTCCATTGTGCAAGCACGATTGGTTGG  
ATTAGCCCACTTTCCGTAGGTTATATATTTCACTTATGCGGCTTTCTTGATTGCCTCTACATCGGGCAAATTTGGT---

ATGTCACATTAGTAAAGATTTATGATACATGTATAGGGTGCCTCAATGTGTCCGAGCCTGCCCCACTGACGTATTAGA  
AATGATACCCTGGGACGGATGTAAGCTAAACAAATTTGCTTCTGCTCCAAGAACAGAAGATTGTGTTGGTTGTAAGAGAT  
GTGAATCCGCTGTCCAACCGATTTCTTGGAGTTCGGGTTTTCTTTATGGAATGAAACAACCTCGTAGTATGGGTCTAGCT

TAT---ATGACAACCTTTTCGAC---  
TTTCCCTCTGTTTTGGTGCCTTTAGTGGGCTTAATATTTCCGGCAATGGCAATGGCTTCTTTATTTCTTCATGTTCAAAA  
TAATAAGACTGTT---ATGCGAGATCTAAAAACATATCTTTCC---  
GTGGCACC GG TATTAAGTACTCTATGGTTCGGGTCTTTAGCAGGTCTATTGATAGAGATTAATCGTTTTTTCCAGATGC  
GTTGACATTCCTTTTTTT-----  
ATGACTGCTATTTTAGAGAGACGCGAAAGCGAAAGCCTATGGGGTCGCTTCTGTAACCTGGATAACCAGCACCGAAAACCG  
TCTTTACATTGGATGGTTTTGGTGTTTTGATGATCCCTACTTTATTGACCGCAACTTCTGTATTTATTATCGCCTTCATTG  
CTGCTCCTCCAGTAGATATTGATGGTATTCGTGAACCTGTTTCTGGATCTCTACTTTATGGCAACAATATTATTTCCGGT  
GCCATTATTCGGACTTCTGCAGCTATAGGTTTGCACTTTTATCCAATCTGGGAAGCGGCTTCTGTTGATGAATGGTTATA  
CAACGGTGGTCTTATGAATTAATCGTTCTACACTTTTTACTTGGTGTAGCTTGTACATGGGTCTGAGTGGGAGCTTA  
GTTTCCGTCTAGGTATGCGACCTTTGGATTGCTTGTGCATATTCAGTCTCTGTTGCAGCTGCTACTGTTTCTTTGATC  
TACCAATCGGTCAAGGAAGCTTTTCTGATGGTATGCCTTAGGAATCTCTGGTACTTTCAACTTCATGATTGTATTCCA  
GGCTGAGCACAACATCCTTATGCACCCATTTACATGTTAGGCGTAGCTGGTGTATTTCGGCGGTTCCCTATTTAGTGCTA  
TGCATGGTCTTTGGTAACCTCTAGTTTGTATCAGGGAAACCACAGAAAATGAATCTGCTAATGAAGGTTACAGGTTCCGG  
CAAGAAGAAGAACTTATAATATCGTAGCCGCTCATGGTTATTTTGGCCGATTAATCTTCCAATATGCTAGTTTCAACAA  
CTCTCGTTCTTTACACTTCTTCTAGCTGCTTGGCCTGTAGTAGGTATCTGGTTTACTGCTTTAGGTATCAGCACTATGG  
CTTTCAACCTAAATGGTTTTCAATTTCAACCAATCTGTAGTTGATAGTCAAGGCCGTGTAATTAATACTTGGGCTGATATC  
ATTAACCGCGCTAACCTTGGTATGGAAGTTATGCACGAACGTAATGCTCATAACTTCCCTCTAGACTTA---  
GCTGCTGTTGAAGCTCCATCTACAAATGG---  
ATGGGTTTGCCTTGGTATCGTGTTCATACCGTTGTCTTGAATGATCCCGGTCGGTTGCTGGCTGTCCATATAATGCATAC  
AGCTCTGGTTGCTGGTTGGGCGGGTTCGATGGCTCTATATGAATTAGCAGTTTTTGTATCCTTCTGACCCTGTTCTTGATC  
CAATGTGGAGACAGGGTATGTTTCTTATACCCTTCATGACCCGTTTAGGAATAACCAGTTCGTGGGGCGGTTGGAGTATC  
ACAGGAGGGGCTACACCGAATCCGGGTATTTGGAGTTACGAGGGTGTGGCCGGGGCACATATTGTGTTTTCTGGCTTGTG  
CTTCTTGGCAGCTATCTGGCACTGGACGTATTGGGATCTAGCAATCTTTTGTGATGAACGTACAGGAAAACCTTCTTTAG  
ATTTGCCCAAGATCTTTGGAATTCATTTATTTCTCGCGGGGTTAGCTTGGCTTTGGTTTTGGTGCATTTTCATGTAACAGGC  
TTGTATGGTCTTGGAAATATGGGTGTCCGATCCTTATGGACTAACGGGAAAAGTACAATCCGTAAATCCAGCGTGGGGCGT  
GGAAGTTTTGATCCTTTTGTTCGGGAGGAATAGCTTCTCATCATATTGCAGCAGGTACATTGGGCATATTGGCGGGTCT  
TATTCCTCTTAGCGTCCGCCCCGCCAACGCTCATACAAAGGGTTACGTATGGGCAATATTGAACTGTACTTTCCAGT  
AGTATTGCGGTGTCTTTTTTGCAGCTTTTTGTGTTGCCGGAACATGTGGTATGGTTTCAGCAACTACCCCAATCGAATT  
ATTTGGCCCTACTCGTTTCAATGGGATCAGGGGTACTTCCAGCAAGAGATATATCGAAGAGTTAGTGTGGGCTAGCCG  
AAAATCAAAGTTTTATCAGAAGCTTGGTCTAAAATTCCTGAAAAATTAGCTTTTTTATGATTACATCGGCAATAATCCGGCA  
AAAGGGGGATTATTACAGAGCAGGCTCAATGGATAATGGGGATGGAATAGCGGTTGGATGGTTAGGACATCCTATCTTTAG  
AGATAAAGAAGGGCGTGAACCTTTTTGTACGTCGTATGCCTACCTTTTTTGAACCTTCCCGGTCGTGTTGGTAGATGGTG  
ACGGAATTGTTAGAGCGGATGTTCTTTTTCGAAGGGCAGAATCGAAGTATAGTGTGCAACAAGTAGGTGTAACCTGTTGAG  
TTCTACGGTGGCGAACTCAACGGAGTCAGTTATAGTATCCTGCTACTGTGAAAAAATATGCTAGACGCGCTCAATTGGG  
TGAAATTTTTGAATTAGATCGTGCTACTTTGAAATCCGATGGTGTTTTTTCGTAGCAGTCCAAGGGGTTGGTTTTACTTTT  
GACATGCTTCTTTTGGCTTTGCTCTTCTTCTTTGGACATATTTGGCATGGTGTAGAACCTGTTTCAGAGATGTTTTTGT  
GGTATTGACCCAGATTTGGATGCTCAAGTAGAATTTGGAGCATTCCAAAA---  
CTAGGAGATCCTACTACAAGAAGACAGACA---GTC-----  
ATGAAAACCTTATATTCCTGAGGAGGTTCTACCCCGTGAAACGCTCTTTAATGGAACCTTTAGCTTTAGCTGGTCGTGA  
CCAAGAAACCACCGGTTTCGCTTGGTGGGCGGGGAATGCCCGGCTTATCAATTTATCCGGTAAACTACTAGGGGCTCATG  
TAGCCCATGCCGATTAATCGTATTCTGGGCCGGGGAATGAACCTATTTGAAGTGGCTCATTTTCGTACCAGAAAAGCCT  
ATGTATGAACAAGGATTAATTTTACTTCTCACCTAGCTAC  
Dioscorea GTTGCTATCCCCGGATCC---  
CGGGGGGAGTACGTACAGATGGAATAATTTCTTAAACGTATTACCACATCCCCAAGGGTTGGAACCCCTTCTTACGGGTCA  
GTGGAATCTTTATGCCAAAACCTCTGATTCAGCAGTCATTTATTTGGTACCTCCAAGGGGGCGGGAACCTGCCATTCTAA  
CTCTTCTTGGGGGATTCATCCACAAAACGCAAAGTTTATGGCTGACCGATATTGCTCATCATCATTTAGCCATTGCATTT  
CTTTTTCTCGTTGCTGGTCAATATGTATAGAACTAACTTCGGGATTGGGCACAGTATCAAAGATCTTTTAGAAGCACATAT  
TCCTCCTGGGGGTCGATTAGGACGTGGACATAAAGGCTTTTATGACACAATCAATAATTCGATTCATTTTCAATTAGGTC  
TTGCTCTAGCCTCTTTAGGGGTTATTACTTCTTGTAGTACTCAACACATGTAATCTTTTACCTGCTTATGCATTCATAGCA  
CAAGACTTTACTACTCAAGCTGCGTTATATACTCATACCAATACATCGCAGGGTTCATCATGACAGGAGCCTTTGCTCA  
TGGAGCTATATTCTTCATTAGAGATTACAATCCGGAACAGAATGAAGATAATGTATTGGCAAGAATGTTAGACCATAAAG  
AAGCTATCATATCTCATTTAAGTTGGGCCAGCTTGTCTTGGGATTCCATACTTTGGGACTTTATGTTTATAACGACGTC  
ATGCTCGCTTTTGGTACTCCGGAAAAACAAATCTTGATTGAACCCATATTTGCCCAATGGATAACAATCTGCTCATGGTAA  
GACTTCATATGGGTTTCGATGTACTCTTATCTTCAACGAATGGCCAGCATTCAATGCGGGTCAAGTATATGGTTACCTG  
GTTGGCTGAATGCTATTAATGAGAATAGTAATTCACTCTTCTTAAACAATAGGTCCTGGAGATTTCTTGGTCCATCATGCT  
ATTGCTCTAGGTTTGCATACAACCTACATTGATTTTAGTAAAAGGTGCTTTAGATGCACGTGGTTCCAAGCTAATGCCAGA

TAAAAAGGATTTTGGTTATAGTTTTCTTGGCAGCGGACCAGGACGTGGCGGTACTTGTGATATTTCCGCTTGGGATGCAT  
TTTATTTGGCAGTTTTCTGGATGTTAAATACCATTGGATGGGTTACTTTTTATTGGCATTGGAAACACATCACATTATGG  
CAGGGTAACGTTTTACAATTTAATGAATCCTCCACTTATTTGATGGGATGGTTAAGAGATTATCTATGGTTGAACTCTTC  
ACAACCTATCAATGGATATAACCCTTTTGGTATGAATAGTTTATCGGTATGGGCGTGGATGTTCTTATTTGGGCATCTTG  
TTTGGGCTACTGGATTTATGTTCTTAATTTCTGGCGTGGATATTGGCAGGAATTGATTGAAACTTTAGCATGGGCTCAT  
GAACGTACACCTTTGGCTAATTTAATTCGGTGGAGAGATAAGCCAGTGGCTCTTTCCATTGTTCAAGCAAGATTGGTTGG  
ATTAGCCCCTTTTCCGTAGGTTATATATTTACTTATGCAGCTTTCTTGATTGCCTCTACATCTGGAAAATTTGGT---  
ATGTCGCATTACAGTAAAAATTTATGATACATGTATAGGGTGTACTCAATGTGTACGAGCCTGTCCCACAGATGTATTGGA  
AATGATACCTTGGAAATGGATGTAAAGCTAAACAAATTTGCTTCTGCGCCAAGAACCAGGACTGTGTAGGTTGTAAGAGAT  
GTGAATCTGCTTGGCCCAACAAATTTTTGAGTGTCCGTGTTTATTTATGGCATGAAACAACCTCGGAGCATGGGTCTATCT  
TAT---ATGACAGATCTTAAC---  
TTACCCTCTATTTTTGTGCCCTTAGTAGGCCTAGTATTTCCGGCAATTGCAATGGCTTCATTATCTCTTTATGTCCAAAA  
AAATAAGATTGTC---ATGCGAAATATAAAAAACATATCTTTCC---  
ACGGTTCCCTGTAATACTACTCTATGGTTTGGATCTTTGGCGGGTCTCTTGATAGAAATTAATCGTTTATTTCCCGGATGC  
CTTATTATTTCCCTTTTTTTTTTCATTC---  
ATGACTGCAATTTTAGAGAGACGCGAAAGTACAAGCCTATGGGGTTCGCTTCTGTAACCTGGATAACCAGCACTGAAAACCG  
TCTTTACATTGGATGGTTTTGGTGTTTTGGATGATCCCTACCTTATTGACCGCAACTTCTGTATTTATTATCGCCTTCATTG  
CTGCTCCTCCAGTAGATATTGATGGTATTCGTGAACCTGTTTCTGGTTCTCTACTTTATGGAAACAATATTATCTCTGGT  
GCCATTATTTCTACTTCTGCAGCTATAGGTTTGCATTTTTATCCGATATGGGAAGCAGCATCTGTTGATGAGTGGTTATA  
CAATGGCGGTCTTTATGAACATAATTGTTCTACACTTCTACTTGGTGTAGCTTGTATATGGGTCTGAGTGGGAACCTTA  
GTTTCCGTCTGGGCATGCGTCTTGGATTGCTGTTGCATATTCAGCTCCTGTTGCAGCTGCTACTGCTGTTTTCTTGATC  
TATCCTATTGGTCAAGGAAGTTTTTCTGATGGTATGCCTTTAGGAATTTCTGGTACTTTTAACTTTATGATTGTATTCCA  
GGCAGAACACAATATCCTTATGCACCCATTTACATGTTAGGCGTAGCTGGTGTGTTCCGGCGGCTCCCTATTTAGTGCTA  
TGCATGGTTCTTTGGTAACCTCTAGTTTGGATCAGGGAAACCCTGAAAACGAGTCTGCTAATGAAGGTTACAAATTCGGT  
CAAGAGGAAGAACTTATAATATCGTAGCTGCTCATGGTTATTTTGGTTCGATTGATCTTCCAATATGCTAGTTTCAACAA  
TTCTCGTTCTTTACATTTCTCTTGGCTGCTTGGCCTGTAGTAGGTTATTTGGTTTACTGCTTTGGGTATTAGTACTATGG  
CTTTCAACTTAAATGGTTTTCAATTTCAACCAATCTGTAGTTGACAGTCAAGGCCGTGTCATTAACACTTGGGCTGATATC  
ATTAATCGCGCTAACCTTGGTATGGAAGTAATGCATGAACGTAATGCTCACAACTTTCTCTAGACCTA---  
GCTGCTGTTGAAGCTCCATCTACAAATGGA---  
ATGGGTTTACCTTGGTATCGTGTTCATACTGTCTGATTGAATGATCCCGGTTCGATTACTTTCTGTCCATATAATGCATAC  
AGCTCTAGTTTTCTGGTTGGGCCGGCTCGATGGCTCTATACGAATTAGCGGTTTTTGGATCCCTCTGACCCCGTTCTTGATC  
CAATGTGGAGACAAGGTATGTTTGTATACCCCTTCATGACCCGTTTAGGAATAACCAATTCATGGGGTGGTTGGAGTATT  
TCAGGGGGAAAGTATAACGAATCCGGGTATTTGGAGTTATGAAGGTGTGGCAGGGGCACATATTGTGTTTTCCGGCTTGTG  
CTTTTTGGCAGCTATCTGGCATTGGGTGTATTGGGACCTAGAAATATTCTGTGATGAACGTACGGGAAAACCTTCTTTGG  
ATTTGCCCAAAATCTTTGGAATTCATTTATTTCTCTCAGGATTGGCTTGTTTTGGCTTTGGCGCATTTTCATGTAACAGGC  
TTGTATGGTCTTGAATATGGGTGTCCGATCCTTATGGACTAACTGGAAAAGTACAATCTATAAATCCAGCATGGGGTGT  
GGAAGTTTTGATCCTTTTGTCCGGGAGGAATAGCCTCTCATCATATTGCAGCGGTACATTGGGCATATTAGCGGGTCT  
TATCCATCTTAGTGTTTCGTCACCTCAACGTCTATACAAAGGATTACGTATGGGAAATATTGAAACTGTACTTTCCAGT  
AGTATCGCTGCTGTTTTTTTTGTCAGCTTTTCGTAGTTGCCGGAACCTATGTGGTATGGTTCAGCAACTACCCCAATCGAATT  
ATTTGGTCCCCTCGTTATCAGTGGGATCAGGGATACTTCCAGCAAGAAATATATCGAAGAGTTGGGGTTGGACTGGCCG  
AAAATCTGAGTTTATCGGAAGCTTGGTCTAAAATTTCCCGAAAATTAGCTTTTTATGATTATATTGGTAATAATCCAGCA  
AAAGGGGGATTATTTAGAGCAGGCTCAATGGACAACGGGGATGGAATAGCTGTTGGATGGTTAGGACACCCCATCTTTAG  
AGATAAAGAAGGGCGTGAGCTTTTTGTACGTCTGATGCCTACCTTTTTTGAACATTCCCGGTAGTTTTGGTAGATGTAG  
ACGGAATTGTTAGAGCCGATGTTCTTTTAGAAGGGCGGAATCAAAATATAGTGTGAACAAGTAGGTGTAACCTGTTGAG  
TTCTATGGTGGCGAACTCAATGGAGTCAGTTATAGTGTATCCACTACTGTGAAAAAATATGCTAGACGTGCCCAATTAGG  
TGAAATTTTTGAATTAGACCGGGCTACTTTGAAATCCGATGGTGTTTTTTCGTAGTAGTCCAAGAGGTTGGTTCACTTTTCG  
GGCATGCCTCATTGCTCTGCTCTTTCTTTTTCGGACACATTTGGCATGGCGCTAGAACCTTGTTCAGAGATGTTTTTGT  
GGTATTGATCCAGATTTGGATGCTCAAGTGAATTTGGAGCATTCCAAAA---  
ATTGGAGATCCAACCTACACGGAGACAGGCA---GTC-----  
ATGAAAACCTTATATTTCCCTGAGGAGGTTCTACCCCGTGGAAACGCTCTTTAATGGAACCTTTAGCTTTAGCTGGTCTGTA  
CCAAGAAACTACCGGTTTTCGCTTGGTGGGCGGGGAATGCCAGACTTATAAATTTGTCTGGTAAACTACTTGGGGCTCACG  
TAGCCCATGCCGATTAATCGTATTCTGGGCCGGAGCAATGAACCTATTTGAAGTGGCTCATTTTCGTACCAGAGAAACCC  
ATGTATGAACAGGGATTGATTTTACTTCCCCACCTAGCTAC  
Drimys           GTCGCTATTTCCCGGATCG---  
AGGGGGGAGTACGTACAGATGGAATAATTTCTTAGATGTATTACCGTATCCCCAGGGGTTGGGCCCACTTTTTACAGGTCA  
GTGGAATCTTTATGCCCAAAACCCCGATTCCAGTAGTCATTTATTTGGTACCTCCAAGGAGCAGGAACCTGCCATTCTAA  
CCCTTCTCGGGGATTCCATCCACAAACGCAAAGTTTTATGGTTGACCGATATTGCTCATCATCATTTAGCTATTGCATTT

CTTTTTCTCGTTGGTGCATATGTATAGAACTAACTTCGGGATTGGTCACAGTATGAAAGATCTTTTAGAGGCACATAC  
TCCTCCCGGGGGTTCGATTGGGCCGTGGGCATAAGGGTCTTTATGACACAATCAATAATTCGATTCAATTTCAATTAGGTC  
TTGCCCTAGCCTCTTTAGGGGTTATTACTTCTTTGGTAGCTCAACACATGTACTCTTTACCTGCTTATGCATTCATAGCA  
CAAGACTTTACTACTCAAGCTGCGTTATATACTCATCACCATAACATTGCAGGGTTCATCATGACAGGGGCCTTTGCCCA  
TGGAGCTATATTCTTCATTGAGATTACAATCCGGAACAGAATGAGGATAATGTATTGGCAAGAATGTTAGACCATAAAG  
AAGCTATCAAACTCTCAATTAAGTTGGGTGAGCCTGTTTCTGGGGTTCATACCTTAGGACTCTATGTTTATAACGACGTC  
ATGCTTGCTTTTGGTACTCCAGAGAAACAAATCTTGATCGAACCCATATTTGCCCAATGGATACAATCCGCTCATGGTAA  
GACTTCATATGGGTTCGATGTACTCTTATCTTCAACGAATGGCCCAGCATTCAATGCTGGTTCGAAGCATATGGTTACCCG  
GCTGGTAAATGCCGTTAATGAGAATAGTAATTCACTATTCTTAAACAATAGGTCCTGGAGACTTCTTGGTTCATCATGCT  
ATTGCTCTAGGTTTGCATACAACCACATTGATCTTAGTAAAAGGTGCTTTAGACGCACGTGGTTCGAAGTAAATGCCAGA  
TAAAAAGGATTTTCGGTTATAGTTTTCTTGCAGCGTCCGGGACGAGGGGGTACTTGTGATATTTTCGGCTTGGGACGCAT  
TTTATTTGGCAGTTTTCTGGATGTTAAATACCATAGGATGGGTTACTTTTTTATTGGCATTGGAAGCACATCACACTATGG  
CAGGGTAACGTTTTACAATTTAATGAATCCTCCACTTATTTGATGGGATGGTTAAGAGATTATCTATGGTTAAACTCTTC  
ACAACCTATCAATGGATATAACCCTTTTGGTATGAATAGTTTATCAGTGTGGGCGTGGATGTTTTTATTGGGCATCTTG  
TTTGGGCTACTGGATTTATGTTCTTAAATTTCTGGCGTGGATATTGGCAGGAATTGATTGAAACTTTAGCATGGGCTCAT  
GAACGCACACCTTTGGCTAATTTGATTGATGGAGGGATAAACCCTGGCTCTTTCCATTGTACAAGCAAGATTGGTTGG  
ATTAGCCCACTTTTCTGTAGGTTATATATTTCACTTATGCAGCTTTCTTGATTGCCTCTACATCAGGCAAATTTGGT---  
ATGTCACATTCAGTAAAGATTTATGATACATGTATAGGATGTACTCAATGTGTACGAGCCTGCCCCACAGATGTATTGGA  
AATGATACCTTTGGGACGGATGTAAGCTAAGCAAATGCTCCTGCTCCAAGAACAGAAGACTGTGTAGGTTGTAAGAGAT  
GTGAATCCGCTTGCCAACAGATTTCTTGAGTGTCCGGGTTTTATTTATGTCATGAGACAACCTCGCAGCATGGGTCTAGCT  
TAT---ATGACAGATCTCAAC---  
TTACCCTCTATTTTTGTGCCTTTAGTGGGCCTAGTATTTCCGGCAATTGCAATGGCGTCTTTATCTCTTCATGTTCAAAA  
AAACAAGATTGTT---ATGCGAGATATAAAAACATATCTCTCC---  
GTGGCACCTGTGCTAACTACTCTATGGTTCGGGTCTTTAGCAGGTCTATTGATAGAGATCAATCGTTTTATTCCCAGATGC  
GTTGACATTCTCCTTTTTTTTCATT---  
ATGACTGCAATTTTAGAGAGACGCGAAAGCACAAAGCCTATGGGGTTCGCTTCTGCAACTGGATAACCAGCACGGAAAATCG  
TCTTTATATTGGATGGTTTTGGTGTTTTGTATGATCCCCACCTTATTGACCAGCAACTTCTGTATTTATTATCGCATTCAATG  
CTGCTCCTCCAGTGGATATTGATGGTATTCTGTGAACCTGTTTCTGTTTCTTTACTTTATGGAAACAATATTATCTCTGGT  
GCCATTTCTTACTTCTGACCCATCGGTTTGCATTTTACCAGATATGGGAAGCGGCATCTGTTGATGAATGGTTATA  
CAATGGTGGTCTTTATGAACATAATTGTTCTACACTTCTTACTTGGTGTAGCTTGTACATGGGTCTGAGTGGGAACTTA  
GTTTTCCGTCTGGGTATGCGCCCTTGGATTGCTGTTGCATATTCAGCTCCAGTTGCAGCTGCTACTGCTGTTTTCTTGATC  
TACCCTATTGGTCAAGGAAGCTTCTCTGATGGTATGCCTCTAGGAATATCTGGTACTTTCAATTTTATGATTGTATTCCA  
GGCGGAACACAACATCCTTATGCATCCATTTACATGTTAGGCGTAGCTGGTGTATTTCGGCGGCTCCCTATTAGTGCTA  
TGCATGGTTCCTTGGTAACTTCTAGTTTGTATCAGGGAAACCACAGAAAATGAATCTGCTAATGAAGGTTACAGATTCCGT  
CAAGAGGAAGAACTTATAATATCGTCGCCGCTCATGGTTATTTTGGCCGATTGATCTTCCAATATGCTAGTTTCAACAA  
TTCTCGTTTCTTACATTTCTTCTAGCTGCTTGGCCTGTAGTAGGTATCTGGTTCCTGCTTTAGGTATTAGCACCATGG  
CTTTCAACCTAAATGGTTTTCAATTTCAACCAATCTGTAGTTGATAGTCAAGGTCGTGTTATTAACACTTGGGCTGATATC  
ATCAATCGTGCTAACCTTGGTATGGAAGTTATGCATGAACGTAATGCTCACAACCTTCCCTCTAGACCTA---  
GCTGCTGTGCAAGCTCCATCTACAAATGGA---  
ATGGGTTTGCCTTGGTATCGTGTTCATACCGTTCGATTTGAATGATCCCGTTCGGTTACTTTCTGTCCATATAATGCATAC  
AGCTCTAGTTTTCTGGTGGGCCGGTTCGATGGCTCTATACGAATTAGCAGTTTTTGTATCCCTCTGATCCCGTTCCTTGATC  
CAATGTGGAGACAAGGTATGTTTGGTTATACCCTTCATGACTCGTTTAGGGATAACCAATTCATGGGGTGGTTGGAGTATC  
ACAGGAGGAACATAACGAATCCGGGTATTTGGAGTTACGAAGGTGTGGCTGGGGCACATATTGTGTTTTCTGGCTTGTG  
CTTCTTAGCAGCTATCTGGCATTGGGTGTATTGGGACCTAGAAAATATTCTGTGATGAACGTACGGGAAAACCCTCTTTGG  
ATTTGCCCAAGATCTTTGGAATTCATTTATTTCTATCAGGGGTGACTTGTCTTGGGTTTGGCGCATTTTATGTAACAGGC  
TTGTATGGTCTTGGAAATATGGGTGTCGGATCCTTATGGTCTAACCGGAAAAGTACAATCTGTAATCCAGCGTGGGGCAC  
AGAAGTTTTTGTATCCTTTTTGTTCCGGGAGGAATAGCCTCCCATCATATTGCAGCGGGGACATTTGGGATATTGGCGGGC  
TATTCATCTTAGTGTTCGTCGCCCCAACGTTTTATACAAAGGATTACGTATGGGCAATATTGAAACTGTACTTTCTAGT  
AGTATCGCTGCTGCTTTTTTGCAGCTTTCTGTCGTTGCTGGAACATATGGTATGGTTTCCAGCAACGACTCCCATAGAATT  
ATTTGGTCCCCTCGTTATCAGTGGGATCAGGGATACTTCCAGCAAGAAATATATCGAAGAGTTGGCGCCGGGCTAGCCG  
AAAATCTGAGTTTATCGGAAGCTTGGTCTAAAATTTCCCGAAAATTAGCTTTTTTATGATTACATCGGTAATAATCCGGCG  
AAGGGGGGATTATTAGAGCAGGCTCAATGGACAATGGGGATGGAATAGCTGTTGGATGGTTAGGACACCCCATCTTTAG  
AGATAAAGAGGGGCATGAGCTTTTTGTACGTCGTATGCCTACTTTTTTTGAAACATTTCCAGTGGTTTTGGTAGACGGAG  
ACGGAATTGTGAGAGCGGATGTTCTTTTAGAAGGGCAGAATCGAAGTATAGTGTGAAACAAGTAGGTGTAACCTGTTGAG  
TTCTATGGTGGCGAATCAATGGGGTCACTTATGGCGATCCTGCTACTGTGAAAAAATATGCTAGACGTGCCCAATTTGGG  
TGAAATTTTTGAATTAGATCGTGCTACTTTGAAATCCGATGGTGTTTTTCTGATGAGTCCAAGGGGTTGGTTCACTTTTG  
GACATGCTACGTTTGGCTTGTCTTTTTTTCGGACACATTTGGCATGGGGCTAGAACCTTGTTCAGAGATGTTTTTGT

GGTATTGACCCTGATTTGGATGCTCAAGTGGAAATTTGGAACATTCCAAAAA---  
CTTGGAGATCCAACACTACAAGGCGACAAGTA---GTC-----  
ATGAAAACCTTATATTTCCCTGAGGAGGTTCTACCCCGTGAAACGCTCTTTAATGGAACCTTTAGCTTTAGCTGGTTCGTGA  
TCAAGAAACCACTGGTTTTCGCTTGGTGGGCGGGAATGCCCGACTTATCAATTTGTCCGGTAAACTACTCGGGGCTCAGC  
TAGCCCATGCCGGATTAATCGTATTCTGGGCCGGAGCAATGAACCTATTTGAAGTGGCTCATTTTCGTACCAGAGAAACCC  
ATGTATGAACAAGGATTGATTTTACTTCCCCATCTAGCTAC  
Eucalyptus GTCGCTATTCCCTGGATCC---  
AGGGGGGAATACGTTTCGATGGAATAATTTTTTAGATGTATTACCGCATCCCGAAGGGTTAGGACCACTTTTTACAGGTCA  
GTGGAATCTTTATGCCAAAACCCCGATTCAAATAGTCATTTATTTGGTACCTCCCAAGGATCAGGAACTGCCATTCTAA  
CCCTTCTAGGGGATTCCATCCACAAACGCAAAGTTTATGGTTGACTGATATTGCTCATCATCATTTGGCTATTGCATTT  
ATTTTTCTCGTTGCTGGTTCATATGTATAGAATACTCGGGATTGGGCACAGTATAAAAAGATCTTTTAGAAGCACATAC  
TCTTCCGGGGGACGATTGGGGCGTGGACATAAAGGTCTTTATGACACAATCAATAAATTCGATTCATTTTCAATTAGGCC  
TTGCTCTAGCCTCTTTAGGTGTTATTACTTCTTGGTAGCTCAACACATGTAATCTTTACCTGCTTATGCGTTCATAGCA  
CAAGACTTTACTACTCAAGCTGCGTTATATACTCATCACCATAACATCGCAGGATTCATCATGACAGGGGCTTTTGCTCA  
TGGGGCTATATTTTTTATTAGAGATTACAATCCGGAACAGAATGAGGATAATGTATTGGCAAGAATGTTAGACCATAAAG  
AAGCTATCATATCCCATTTAAGTTGGGCCAGCCTCTTTCTGGGGTTCCACACTTTGGGGCTTTATGTTTATAATGATGTC  
ATGCTTGCTTTTGGTACTCCGGAGAAACAAATCTTAATCGAACCTATATTTGCCCAATGGATAACAATCTGCTCATGGTAA  
AACTTCATATGGGTTTCGATGTGCTTTTATCTTCAACGAATAGCCCAGCATTTAATGCAGGTCAAAGCATATGGTTGCCCG  
GCTGGTTAAATGCTATTAATGAGAATAGTAATTCATCTTAAACAATTGGTCTCGGAGACTTCTTGGTTCATCATGCG  
ATTGCTCTAGGTTTACATACAACACTACATTGATCTTAGTAAAAGGTGCTTTAGATGCACGTGGTTCAAAGTTAATGCCAGA  
TAAAAGGATTTTCGGTTATAGTTTTCTTGCATGGTCCGGGACGAGGCGGTACTTGTGATATTTCCGCTTGGGACGCAT  
TTTTTTGGCAGTTTTCTGGATGTTAAATACCATTGGGTGGGTTACTTTTTATTGGCATTGGAACACATCACATTATGG  
CAGGGTAACGTTTTACAGTTTTAATGAATCTTCCACTTATTTGATGGGATGGTTAAGAGATTATCTATGGGTAAACTCTTC  
ACAACCTTATCAATGGATATAACCCCTTTGGTATGAATAGTTTATCAGTTTGGGCGTGGATGTTCTTATTTGGACATCTTG  
TTTGGGCTACTGGATTTATGTTTTAATTTCTGGCGTGGATATTGGCAGGAATTGATTGAAACTTTAGCATGGGCTCAT  
GAACGCACACCTTTAGCTAATTTGATTTCGATGGAGAGATAAACCAGTGGCTCTTTCCATTGTACAAGCAAGATTGGTTGG  
ATTAGCCCATTTTTCTGTAGGTTATATATTCACGTATGCGGCTTTCTTGATTGCCTCCACGTCAGGCAAATTTGGT---  
ATGTCACATTCAGTAAAGATTTATGATACATGTATAGGATGTACTCAATGTGTGCGAGCCTGCCAACAGATGTATTAGA  
AATGATACCGTGGGATGGATGTAAAGCTAAGCAAATGCTTCTGCTCCAAGAACAGAGGACTGTGTGCGTTGTAAGAGAT  
GTGAATCCGCCTGTCCAACGGATTTTTTGAGCGTTCGAGTTTATTTATGGCATGAAACAACCTCGAAGCATGGGTCTAGCG  
TAT---  
ATGATAATTTTTAACAACCTTACCCTCTTTCTTTGTGCCTTTAGTGGGCTTAGTATTTCCGGCAATTGCAATGGCTTCTTT  
ATCTCTTCATGTTCAAAAAACAAGATTTTT---ATGCGAGATCTAAAAACATATCTTTCC---  
GTGGCACCGGTAAGTACTCTATGGTTTGGGGCTTTAGCAGGTCTTTTGATAGAGATCAATCGTTTATTTCCGGATGC  
GTTGACATTCCTTTTTTTTTTCATTC---  
ATGACTGCRATTTTAGAGAGACGCGAAAGCGAAAGCCTATGGGGTCGCTTCTGTAACCTGGATAACCAGCACCGAAAACCG  
TCTTTACATTGGATGGTTTTGGTGTTTTATGATCCCTACCTTATTGACCGCAACTTCTGTATTTATTATTGCCTTCATTG  
CTGCTCCTCCAGTAGATATTGATGGTATTCGTGAACCTGTTTCTGGATCTCTACTTTATGGAACAATATTATCTCGGGT  
GCCATTATTCCTACTTCTGCAGCTATAGGTTTGCATTTTTACCCAATATGGGAAGCGGCATCTGTTGATGAATGGTTATA  
CAACGGCGGTCCTTATGAGCTAATTGTTCTACACTTCTTACTTGGTGTAGCTTGTACATGGGTTCGTGAGTGGGAACCTA  
GTTTCCGTCGGGTATGCGCCCTTGGATTGCTGTTGCATATTCAGCTCCTGTTGCAGCTGCTACTGCTGTTTTCTTGATC  
TACCCAATTGGTCAAGGAAGTTTTTCGGATGGTATGCCTCTAGGAATTTCTGGTACTTTCAACTTCATGATTGTATTCCA  
GGCTGAGCACAACATCCTTATGCACCCATTTACATGTTAGGCGTAGCTGGTGTATTTCGGCGGCTCCCTATTTCAGTGCTA  
TGCATGGTTCCTTGGTAACCTCTAGTTTGTATCAGGGAAACCACAGAAAATGAATCTGCTAATGAAGGTTACAGATTCCGT  
CAAGAGGAAGAACTTATAATATCGTAGCTGCTCATGGTTATTTTGGCCGATTGATCTTCCAATATGCTAGTTTCAACAA  
TTCTCGTTCTTTACACTTCTTCTAGCTGCTTGGCCTGTAGTAGGTATCTGGTTCAGTCTTTAGGTATCAGCACTATGG  
CTTTCAACCTAAATGGTTTTCAATTTCAACCAATCCGTAGTTGATAGTCAAGGTCGTGTAATTAATACCTGGGCTGATATT  
ATTAATCGTGCTAACCTTGGTATGGAAGTTATGCATGAACGTAATGCTCATAACTTCCCTCTAGACCTA---  
GCTGCTGTCGAAGTTCATCTACAAATGGA---  
ATGGGTTTGCCTTGGTATCGTGTTCATACCGTTCGATTAATGATCCCGCCGTTTGGCTTTCTGTCCATATAATGCATAC  
AGCTTTGGTTGCTGGTTGGGCCGGTTCGATGGCTCTATATGAATTAGCAGTTTTTGGATCCCTCTGATCCCGTTCTTGATC  
CAATGTGGAGACAAGGTATGTTTCGTTATACCCTTCATGACTCGTTTAGGAATAACCAATTCATGGGGCGGCTGGAGTATT  
ACAGGAGGGACTATAACAAATCCGGGTATTTGGAGTTACGAAGGCGTGGCCGGTGCACATATTGTGTTTTCTGGCTTGTG  
CTTCTTGGCAGCTATCTGGCATTGGGTGTATTGGGATTTAGAAAATATTTTGTGATGAGCGTACAGGAAAACCTTCTTTGG  
ATTTGCCAAAATTTTTGGAATTCATTTATTTCTTTTCCAGGAGTGGCTTGGCTTTGGGTTTGGCGCATTTTCATGTAACAGGA  
TTGTATGGTCTTGAATATGGGTGTCCGATCCTTATGGACTAACTGGAAGGTACAACCTGTAATCCAGCGTGGGGTGT  
AGAAGTTTTGATCCTTTTGTTCGGGAGGAATAGCCTCTCATCATATTGCAGCAGGTACTTTAGGCATATTAGCGGGCC



TATTTTCATCTTAGTGTCCGTCGCCCCAACGTCTATATAAAGGATTACGTATGGGCAATATTGAAACCGTCCTTTCCAGT  
AGTATTGCTGCTGTCTTTTTTGCAGCTTTTGTGTTGCTGGAACCTATGTGGTATGGTTCAGCAACTACCCCTATCGAATT  
ATTTGGTCCCCTCGTTATCAATGGGATCAGGGATACTTCCAGCAAGAAATATATCGAAGAGTTGGTGTGGGCTAGCCA  
AAAATCAAAGTTTATCAGAAGCTTGGTCTAAAATTCCTGAAAAATTAGCTTTTTATGATTATATCGGTAATAATCCGGCA  
AAGGGGGGATTATTAGAGCGGGTCAATGGACAACGGGGATGGAATAGCTGTTGGGTGGTTAGGACATCCTATCTTTCCG  
AGATAAAGAAGGGCGTGAACTTTTTGTACGTCGTATGCCTACTTTTTTGAACATTTCCGGTTGTTTTGGTAGACGGAG  
ACGGAATTGTTGAGCCGACGTTCTTTTTCGAAGGGCGGAATCAAAGTATAGTGTGAACAAGTGGGTGTAACCTGTTGAG  
TTCTATGGCGGGAACTCAATGGAGTCAGTTATAGTGATCCTGCTACTGTGAAAAATATGCTAGACGTGCCCAATTAGG  
TGAAATTTTTGAATTAGATCGTGCTACTTTGAAATCCGATGGTGTTTTTTCGTAGCAGTCCAAGGGGTTGGTTTTACTTTTG  
GACATGCTTCGTTTGTCTGCTCTTCTTCTCGGACACATTTGGCATGGTGTAGAACCTTGTTCAGAGATGTTTTGCT  
GTTATTGACCCCGATTGGATGCTCAAGTGAATTTGGAGCATTCCAAAA---  
CTTGGAGATCCAACATAAGAAGACAAGTA---GTC-----  
ATGAAAACCTTATATTCCCTGAGGAGGTTCTACCCCGTGAAACGCTCTTTAATGGAACCTTAGCTWTAGCTGGTCGTGA  
CCAAGAAACCACCGGTTTCGCTTGGTGGGCGGGGAATGCACGACTTATCAATTTATCCGGTAAACTGTTGGGGGCTCATG  
TAGCCCATGCCGATTAATCGTATTCTGGGCCGGAGCAATGAACCTATTTGAAGTGGCTCATTTTGTACCAGAAAAGCCC  
ATGTATGAACAAGGATTAATTTTACTTCCCCACTTAGCTAC  
Ginkgo GTCGCTATTCTGAATCA---  
AGGGGGGAGCACGTCAGATGGGATAATTTCTCAAATGTATTACCGTATCCCCAAGGTCTAGGACCGTTTTCTTACAGGTCA  
GTGGAATCTTTATGCTCAAAATCCTGATTCTAGTAGTCACTTATTCGGTACTTCTCAAGGGGCGGGAACCTGCTATTCTAA  
CTCTTCTCGGAGGATTCCATCCACAAACTCGAAGTTTTATGGCTGACTGATATCGCTCATCATCATTTAGCTATTGCATTT  
GTTTTTTTTCATCGCTGGTCATATGTATAGAATAATTTCCGGGATTGGGCACAGTATAAAAGATATTTTAGAAGTACATAT  
TCCTCCAGGAGGCCTATTAGGACGCGGACATAAGGGTCTTTATAACACAATCAATAATTCTTCTCACTTCCAACCTAGGTC  
TTGCTCTAGCTTCTTTGGGGGTTATCACTTCTTGGTAGCTCAACACATGTATTCTTTACCTGCTTATGCATTCATAGCA  
CAAGACTTCACTACCCAAGCTGCACTATATACTCATCATCAATACATTGCCGGGTTTATTATGACAGGGGCCTTTGCTCA  
TGGAGCTATATTCTTCAATTAGGGATTATAATCCAGAACAATAAGGACAATGTATTGGCGAGAATGTTAGAGCATAAGG  
AAGCTATAATATCTCATCTGAGTTGGGCTAGTTTATTCCTAGGTTTCCATACCTTGGGACTTTATGTCCATAACGATGTT  
ATGCTTGCTTTTGGTACTCCAGAAAAACAATAATTGATCGAGCCCATAATTGCTCAGTGGATAACAATCTGCTCATGGTAA  
GGCCTTATATGGTTTTGATGACTCTTATCTTCAACAAATGGTCCGGCATTCAATGCTGGTCAAAGCATATGGTTACCTG  
TTGGTTGAATGCTAATAATGATAATAGCAATTTCACTATTTCTTAACAATTTGGTCTGGAGACTTTTTGGTTTCATCATGCT  
ATTGCTTTAGGTTTGCATACAACACTACGTTGATCTTAGTAAAAGGTGCTTTAGATGCGCGTGGTTCTAAGCTAATGCCAGA  
TAAGAAAGATTTTTGGTTATAGTTTTCCCTGCGATGGTCCAGGACGAGGCGGTACTTGTGATATTTCCGCCTGGGATGCTT  
TTTACTTGGCAGTTTTTTGGATGTTGAATACCATTGGATGGGTTACTTTCTACTGGCATTGGAAGCATATCACCTTATGG  
CAGGGTAATGTAGCGCAATTTAATGAGTCTTCCACTTATTTAATGGGATGGTCAAGAGATTATCTCTGGTTAAACTCCTC  
ACAACCTATTAATGGATAACAATCCTTTCCGGTATGAACAGTTTATCTGTCTGGGCGTGGATGTTCTTATTCGGGCATCTTG  
TTTGGGCTACTGGATTTATGTTTTCTGATTTCTGGCGTGGATATTGGCAAGAAGCTGATAGAACTCTAGCATGGGCCCCAC  
GAGCGCACACCTTTGGCTAATTTAGTTCGATGGAGAGACAAGCCAGTAGCTCTTTCCATCGTTCAAGCACGATTAGTTGG  
ATTAGCTCATTTTCCGTAGGTTATATATTTCACTTATGCAGCTTTCTTAATCGCCTCTACATCAGGCAAATTTGGT---  
ATGGCGCATTACAGTAAAAATTTATGATACGTGTATTGGTTGTACCCAATGTGTACGAGCTTGTCCACAGATGTATTGGA  
AATGATACCCTGGGAAGGATGTAAAGCTAAGCAAATTGCTTCTGCTCCAAGAACAGAAGACTGCGCAGGTTGCAAGAGGT  
GTGAATCTGCTTGTCCAACAGATTTCTTGAGTGTACGTGTTATTTGTGGCATGAGACAACCTCGCAGTATGGGTCTAGCT  
TAT---ATGACAGATCCCAAC---  
TTACCTTCTATTTTTGTGCCTTTAGCGGGCTTATTATTTCCGGCAATTGCAATGGCTTTTTTGTATTTCTATGTTCAAAA  
GAAAAAGATTGTA---ATGCGAGATATAAAGATATATCTTTCC---  
GTGGCACCTGTGCTAGCTACTTTATGGTTCGGGTCTTTAGCCGGTCTATTGATAGAGATCAATCGTTTTTTCCCGGATGC  
TCTGGCTTCTCCCTTCTCCTCATT---  
ATGACTGCAACTTTAGAAAGACGCGAAAGCCTATGGGGTTCGCTTTTTCGATTGGATTACCAGCACCGAAAACCG  
CCTTTACATTGGATGGTTCGGTGTCTTAATGATCCCTACACTATTGACCAGCAACCTCTGTATTTCATCATCGCTTTTCATTG  
CAGCTCCTCCAGTAGATATTGATGGTATTTCGCGAGCCTGTTTCTGGTTCTTCTTTTATGGAACAATATTATCTCCGGT  
GCTATTATTCCACCTCTGCAGCTATTGGTTTGCACCTTCTACCCCATTTGGGAAGCAGCTTCCACCGATGAATGGCTATA  
CAACGGTGGTCCCTATGAGCTAATCGTTTCTACACTTCCACTTGGTGTAGCTTGTACATGGGTGCTGAGTGGGAACCTTA  
GCTTCCGCTTAGGTATGCGCCCTTGGATTGCTGTTGCATACTCAGCTCCTGTGCGAGCTGCTACTGCTGTTTTCTTGATT  
TACCCCATCGGTCAAGGAAGCTTCTCCGACGGTATGCCTCTAGGAATTTCTGGTACTTTCAATTTTATGATTGTATTCCA  
GGCTGAGCACAATATCCTTATGCATCCATTCCACATGTTAGGTGTAGCTGGCGTATTCCGGCGGCTCTCTATTAGTGCTA  
TGCATGGTTCTTAGTAACCTCTAGTTTGTATCAGAGAACTACCGAGAATGAGTCTGCTAATGCAGGTTACAAATTCGGT  
CAGGAGGAAGAAACCTATAATATCGTAGCTGCTCACGGTTATTTTGGACGATTGATCTTCCAATATGCTAGTTTCAATAA  
CTCCCGTTCCCTACATTTCTTCTTAGCTGCTTGGCCTGTAGTAGGTATTTGGTTTTACTGCTCTGGGTATTAGCACTATGG  
CTTTCAACTTAAATGGGTTCAATTTCAACCAATCTGTAGTTGATAGTCAAGGTCGTGTAATTAACACTTGGGCTGATATA

ATTAATCGTGCTAACCTTGGTATGGAAGTTATGCACGAACGTAACGCTCACAACTTCCCTTTGGATCTA---  
GCCGCTGTTGAAGCTCTTTCTATAGCTGGA---  
ATGGGTTTACCTTGGTATCGTGTCCATACCGTTCGATTGAATGATCCTGGCCGGTTACTCTCTGTACATATAATGCATAC  
AGCTCTAGTTTTCTGGTTGGGCCGGTTCAATGGCTTTGTACGAATTAGCAGTCTTTGATCCATCCGATCCTGTTCTTGATC  
CAATGTGGAGACAAAGTATGTTTCGTTATACCTTTTTATGACTCGTTTAGGAATAAAGGATTTCGTGGGGTGGGTGGAGTATC  
ACTGGAGAACTGTAACCAATCCAGGTATTTGGAGTTATGAAGGTGTGGCCGGGGCACATATCGTGTCTTTCTGGCTTGTG  
CTTTTTGGCAGCTATCTGGCATTGGGTATATTGGGATCTAGACATATTCTGCGATGAACGTACGGGAAAACCTTCTCCAG  
ATTTGCCCAAGATCTTTGGAATTCATTTATTCCTATCAGGAGTAGCTTGTTCGGATTCCGGAGCATTTTCATGTAACGGGT  
TTGTATGGTCCCTGGAATATGGGTGTCTGATCCTTATGGACTAACTGGGAAAATACAACCTGTAAATCCAGCGTGGGGAGC  
TGAGGGTTTCGATCCTTTTCGTTCCAGGAGGAATAGCTTCTCATATATTGCAGCAGGTATATTGGGTATATTAGCAGGTC  
CATTCCATCTTAGTGTTCGTCCTCCCCAACGTTTTATACAAAGGATTACGTATGGCAATATTGAAACTGTCTTTATCCAGC  
AGTATCGCCGCTGTGTTTTTTGAGCTTTTCATTGTCTGGAACCATGTGGTATGGCTCCGCAACTACCCCGGTGCAATT  
ATTTGGTCCCTACTCGTTACCAGTGGGATCAGGGATACTTCCAACAAGAAATAGATCGACGGGTTTCGTGCCGGTCTGGCTG  
AAAATCGAAGTTTTATCGGAAGCTTGGTCCAAAATTTCCCGAGAACTCGCTTTTTATGACTACATTGGTAATAATCCAGCT  
AAAGGGGGGTTATTTCAGAGCGGGTGGGATGGACAATGGAGATGGAATAGCTGTTGGTTCGGTTAGGACACCCTATCTTTAA  
AGATAAAGAAGGACACGAGCTTTTTGTACGTCGTATGCCTACCTTTTTTGAACATTTCCAGTAGTTCTGGTAGATGAAG  
AAGGAATTGTGAAAGCCGATGTTCCCTTTTCAGGAGAGCAGAATCGAAGTATAGTGTGAAACAAGTAGGCGTAACCTGTTGAG  
TTCTATGGGGGTGAACTTGATGGGGTTAGTTTTGGTGATCCCGCCACAGTGAAAAAATATGCTAGACGTGCTCAATTAGG  
GGAAATTTTTGAATTAGATCGTGCTACTTTGAAATCAGATGGTGTTCGCGAGTAGTCCAAGGGGTTGGTTTTACTTTTTG  
GACATGCTACATTTGCTCTTTCTTTTCCGGACACATTTGGCATGGTGCTAGAACCTTGTTTCAGAGATGTTTTTGTCT  
GGTATCGACCCGGATTTAGATGCCCAAGTCGAATTTGGAGCATTCCAAAA---  
CTGGGAGATCCAACTACTAAAAGACAAGTG---GTA-----  
ATGAAAACCTTATATTCCCCGAGGAGGTTCTACCCCGTGGAAACGCTCTTTAATGGAACCTTAGCTTTAGCTGGTTCGTGA  
CCAAGAAACCACAGGTTTCGCTTGGTGGGCCGGGAATGCTCGACTTATCAATTTGTCCGGTAAATTACTCGGGGCTCACG  
TGGCTCATGCCGATTAATTGTATTCTGGGCCGGAGCAATGAACCTATTTGAAGTGGCTCATTTTCGTACCGGAAAAGCCT  
ATGTATGAACAAGGATTGATTTTACTTCCCCATCTAGCTAC  
Glycine GTCGCTATTCCGGGATCC---  
AGGGGGGAATACGTTTCGATGGAATAATTTATTAAGTATATTGCCTCACCCCGAAGGATTAGGTCCATTTTTTCACAGGTCA  
GTGGAATCTTTATGCTCAAAACCCCGATTCCAATAGTCATATATTTGGTACCCCTCAAGGAGCAGGAACCTGCTATTCTAA  
CACTTCTCGGGGATTTTCATCCGCAAACTCAAAGTTTTATGGCTGACCGATATTGCACACCATCATTTAGCTATTGCATTT  
CTTTTTCTAGTTGCTGGCCATATGTATAGAACCAACTTCGGGATTGGTCCAGTATAAAAAGATCTTTTAGAAGCACATAC  
TCCTCCGGGGGGTAGATTGGGGCGTGGACATAAGGGTCTTTATGACACAATCAATAATTCATTTTCAATTAGGTC  
TTGCTCTAGCCTCTTTAGGGGTTATTACTTTCCTTGGTAGCTCAACACATGTACTCTTTACCCGCTTATGCATTTATAGCG  
CAAGACTTTACTACTCAAGCTGCATTATATACTCATCATCAATATATAGCGGGCTTCATTATGACAGGGGCTTTTGCTCA  
TGGAGCTATATTTTTTATTAGAGATTATAATCCAGAACAGAATGAAGATAATGTCTTAGCAAGAATGTTAGACCATAAAG  
AAGCTATCATATCCCCTTAAGTTGGGCTAGCCTCTTTCTGGGGTTCCATACTCTGGGACTTTATGTCCATAATGATGTC  
ATGCTTGCTTTTGGTACTCCGGAGAAACAAATCTTGATTGAACCTATATTTGCCCAATGGATACAATCTGCTCATGGTAA  
AACTTCCATGGGTTTCGATATACTTTTATCTTCAACGAACAGTCCGGCGTTCAATGCAGGACGAAGCATATGGTTGCCTG  
GTTGGTTAAACGCTGTTAATGAGAATAGTAATTTCTCTATTCTTAAACAATAGGGCCTGGAGACTTCTTGGTTTCATCATGCT  
ATTGCTCTTGGTTTACATACAACCTACATTGATCTTAGTAAAGGGTGTCTTGGATGCGCGTGGTTCTAAGTTAATGCCAGA  
TAAAAAAGATTTTGGTTATAGTTTTCTTTCGATGGCCCGGGACGAGGCGGTACTTGGCATATTTCCGGCTTGGGACGCAT  
TTTATTTGGCAGTTTTCTGGATGTTAAATACCATTGGGTGGGTTACTTTTTATTGGCATTGGAAACACATTACACTATGG  
CAGGGTAATGTTTCACAGTTTAAATGAATCTTCTACCTATTTGATGGGATGGTTAAGAGATTATCTATGGTTGAACTCTTC  
ACAACCTTATCAACGGATATAACCCTTTTGGTATGAATAGTTTATCAGTCTGGGCATGGATGTTCTTGTGGACATCTTG  
TTTGGGCTACTGGATTTATGTTCTTAATTTCCCTGGCGCGGATATTGGCAGGAATTGATTGAAACTTTAGCATGGGCTCAT  
GAACGCACACCTTTGGCTAATTTGATTTCGATGGAGAGATAAACCAGTGGCTCTTTCCATTGTGCAAGCAAGATTGGTTGG  
ACTAGCCCACCTTTCCGTAGGTTATATATTTACTTTATGCAGCCTTCTTAATTGCCTCGACTTCGGGCAAATTTGGT---  
ATGTCACATTCAGTAAAAATTTATGATACATGTATAGGATGTACTCAATGTGTCCGAGCCTGCCAACGGATGTATTAGA  
AATGATACCTTGGGACGGATGTAAAGCTAAACAAATAGCTTCTGCCCAAGAACAGAGGACTGTGTTGGTTGTAAGAGGT  
GTGAATCCGCTGTCCGACAGATTTCTTAAAGTGTAGAGTTATTTATGGCATGAAACAACCTCGAAGCATGGGTCTAGCT  
TAT---ATGATA-----AAC---  
TTTTCTTCCATTTTTTGTTCCTCTAGTAGGCCTAGTATTTCCGGCAATTGCAATGGCTTCTTTATTTCTTCATGTTCAAAA  
AAACAAGATTTTT---ATGCGAGATCTAAAAACATATCTTTCC---  
GTGGCACCAGTAGTAAGTACTCTATGGTTCGGGGCTTTGGCGGGTCTCTTGATAGAGATCAATCGTTTTTTTTCCAGATGC  
ATTGATATTCCTTTTTTTTTTTCATT---  
ATGACTGCAATTTTAGAGAGACGCGAGAGCGAAAGCCTATGGGGTTCGCTTCTGTAACCTGGATAACCAGCACCGAAAATCG  
TCTTTACATTGGATGTTTTGGTGTTTTTGATGATTCTACTTTATTGACCGCAACTTCTGTATTTATTATCGCTTTTTATTG

CTGCCCTCCAGTAGATATTGATGGTATTCGTGAGCCTGTTTCTGGATCTCTACTTTATGGAAACAATATCATTCTGGT  
GCCATTATTCTACTTCTGCGGCTATAGGTTTGCACCTTTATCCTATTTGGGAAGCGGCATCTGTTGATGAATGGTTATA  
CAACGGCGGTCCTTATGAACATAATTGTTCTACACTTCTTACTTGGTGTAGCTTGTACATGGGGCGTGAGTGGGAACCTA  
GTTTTCGTTTGGGTATGCGTCCTTGGATTGCTGTTGCATATTCAGCTCCTGTTGCAGCCGCTACTGCTGTTTTCTTGATC  
TATCCTATTGGTCAGGGAAGCTTTTTAGATGGTATGCCTCTAGGAATTTAGGTACTTTCAATTTTATGATTGTATTTCA  
GGCTGAGCATAATATTCTTATGCATCCATTTACATGTTAGGTGTAGCTGGTGTATTCGGCGGCTCCCTATTAGTGCTA  
TGCATGGTTCCTTGGTAACTTCTAGTGTGATCAGGGAAACCACAGAAAATGAATCTGCTAATGAAGGTTACAGATTTGGT  
CAAGAGGAAGAAACCTATAATATTGTAGCTGCTCATGGTTATTTTGGCCGATTGATCTTCCAATATGCAAGTTTCAACAA  
TTCTCGTTCTTTACATTTCTTCTTAGCTGCTTGGCCTGTAGTAGGTATTTGGTTTACCCTTTAGGTATCAGCACTATGG  
CTTTCAACTTAAATGGTTTCAATTTCAACCAATCCGTAGTTGATAGTCAAGGTCGTGTAATTAATACCTGGGCTGATATT  
ATTAACCGAGCTAACCTTGGTATGGAAGTAATGCATGAACGTAATGCTCATAATTTCCCTCTAGATCTA---  
GCTGCGATCGACGCTCCATCTATTAATGGA---  
ATGGGTTTACCTTGGTATCGTGTTCATACTGTTGTATTAATGATCCAGGCCGTTTGGTTTTCTGTTTCATATAATGCACAC  
AGCTCTGGTTGCTGGTTGGGCCGGTTTCATAGGCTCTATATGAATTAGCAGTTTTTGGATCCCTCTGACCCTGTTCTTGACC  
CAATGTGGAGACAGGGTATGTTTGGTTATACCTTTTATGACTCGTTTAGGAATAACCAATTCGTGGGGCGGTTGGAATATC  
ACAGGAGGGACTATAACGAATCCGGGTATTTGGAGTTACGAAGGTGTGGCCGGAGCACATATTGTGTTTTCGGGCTTGTG  
CTTTTTAGCGGCTATTTGGCATTGGGTTTTATTGGGATCTAGAAATCTTTTGTGATGAACGACTGGAACCTTCTTTGG  
ATTTGCCCAAATTTTTGGAATTCATTTATTTCTTGCAGGGGTGGCTTGTGTTTTGGTTTTGGCGCATTTTATGTAACAGGA  
TTGTATGGTCTTGAATATGGGTGTCCGATCCTTATGGACTAACTGGAAGGATACAATCCGTAAATCCCGCGTGGGGCGT  
GGAAGTTTTGATCCTTTTGTCCGGGGGGGGTAGCTTCTCATCATATTGCAGCAGGAACGTTGGGCATATTAGCAGGTC  
TTTTCCATCTTAGTGTGCGTCCACCCCAACGTCTATATAAAGGATTACGGATGGGAAATATTGAAACTGTCCTTTCCAGC  
AGTATTGCTGCTGCTTTTTTGCAGCTTTTGTGCTTGGTGAACATATGGTATGGTTTCCAGCAACAACCCCTATTGAATT  
ATTCGGTCTACTCGTTATCAATGGGATCAGGGATACTTTAGCAAGAAATATATCGAAGAGTTGGTGTGGACTAGCCG  
AAAATCAAAGTTTATCAGAAGCTTGGTCTAAAATTTCCCGAAAATTTAGCTTTTTTATGATTATATCGGAAATAATCCAGCA  
AAAGGGGGGTTATTTAGAGCAGGTTCAATGGACAATGGAGATGGAATAGCCGTCGGTTGGTTAGGACATCCTGTCTTTAG  
AGATAAAGAGGGGCATGAACCTTTTTGTACGTCGTATGCCTACTTTTTTGAACATTTCCGGTTGTTTTGGTAGATGGGG  
ATGGAATTGTTAGGGCCGATGTTCCTTTTCGAAGGGCAGAATCTAAATATAGTGTGGAACAAGTAGGTGTAATTTGTTGAG  
TTCTATGGTGGCGAGCTTAATGGAGTCAGTTATAGCGATCCCGCTACTGTGAAAAAATATGCTAGACGTGCTCAATTGGG  
TGAAATTTTTGAATTAGACTGCTGCTACTTTGAAATCAGATGGTGTGTTTTTGTAGCAGTCCGAGGGGTTGGTTTTACTTTTTG  
GACATGCTTTTTGCTCTGCTATTTCTTTTTCGGGCACATTTGGCATGGTGTGTAAGACTTTATTCAGAGATGTTTTTGT  
GGTATCGACCCAGATTTAGACGCTCAAGTAGAATTTGGAGCATTCCAAAAA---  
CTTGGAGATCCAATAACAAAAAACAGGTA---GTC-----  
ATGAAAACCTTATATTCCCTGAGGAGGTTCTACCACGTGGAAACGCTCTTTAATGGAACCTTTAGCTTTAACTGGTCTGTA  
CCAGGAAACTACCGGTTTTCGCTTGGTGGGCCGGGAATGCCCGACTTATCAATTTATCCGGCAAACCTACTAGGAGCCCATG  
TAGCCCATGCTGGATTAATAGTATTCTGGGCCGGAGCAATGAACCTTTTTTGAAGTGGCTCATTTTCGTACCCGAGAAGCCC  
ATGTATGAACAAGGTTTAAATTTTACTTCCCCATCTAGCTAC  
Gossypium GTCGCTATTCTGGATCC---  
CGGGGGGAATATGTTTCGATGGAATAATTTCTTAGATGTATTACCGCATCCCCAAGGGTTAGGTCCATTTTTTTTTCAGGTCA  
GTGGAATCTTTATGCTCAAAACCCCGATTCAAGTAGTCATTTATTTGGTACCTCCAAGGATCAGGAACCTGCCATTCTAA  
CCCTTCTCGGGGATTCCATCCACAAACGCAAAGTTTATGGTTGACTGATATTGCACACCATCATTTAGCTATTGCAATT  
CTTTTCTAATAGCGGGTCACATGTATAGAATAACTTCGGAATTGGTCCAGTATAAAAAGATCTTTTAGAAGCACATAT  
TCCTCCGGGAGGACGATTGGGGCGGGGGCATAAGGGTCTTTATGACACAATCAATAATTCGATTCATTTTCAATTAGGCC  
TTGCTCTAGCTTCTTTAGGGGTTATTACGTCCTTGGTAGCTCAACACATGTACTCTTTACCTGCTTATGCGTTCATAGCA  
CAAGACTTTACTACTCAAGCTGCGTTATATACCCATCACCAATACATCGCAGGATTCATCATGACAGGAGCTTTTGCCCA  
CGGAGCTATATTTTTTATTAGAGATTACAATCCGGAACAGAATGAGGATAATGTATTGGCAAGAATGCTAGACCATAAAG  
AAGCTATCATATCCCATTTAAGTTGGGCCAGCCTCTTTCTGGGATTTTACTACTTTGGGACTTTATGTCCATAATGATGTC  
ATGCTTGTCTTTTGGGACTCCGGAGAAAACAAATCTTGATCGAACCCTATTTTGGCCAAATGGATCCAATCTGCTCATGGTAA  
AACTTTCATACGGGTTTCGATGTGCTTTTATCTTCAACGAATGGCCAGCATTCAATGCGGGTTCGAAGCATATGGTTGCCTG  
GCTGGTTAAATGCTGTTAATGAAAATAGTAATTTCACTATTCTTAAACAATAGGTCCTGGAGACTTCTTGGTTTCATCATGCT  
ATTGCTCTAGGTTTACATACAACTACATTGATCTTAGTAAAGGGCGCTTTAGATGCGCGCGGTTCCAAGTTAATGCCGGA  
TAAAAAGGATTTTCGGTTATAGTTTTCTTGCATGGTCCGGGGCGAGGGGGTACTTGTGATATTTTCGGCGTGGGACGCAT  
TTTTTTTGGCGGTTTTCTGGATGTTAAATACCATTGGATGGGTTACTTTTTTATTGGCATTGGAAACACATCACATTATGG  
CAGGGTAACTGCTCACAGTTTTAATGAATCTTCCACTTATTTGATGGGATGGTTAAGAGATTATCTATGGTTAACTCTTC  
ACAACCTATCAATGGGTATAACCCATTTGGTATGAATAGTTTATCAGTCTGGGCGTGGATGTTCTTATTTGGACATCTTG  
TTTTGGGCTACCGGATTTATGTTCTTAAATTTCTTGGCGCGGATATTGGCAAGAATTGATCGAAACTTTAGCATGGGCTCAT  
GAACGCACACCTTTAGCTAATTTGATTCGATGGAGAGATAAACCAGTGGCTCTTTCTATTGTGCAGGCAAGATTGGTTGG  
ATTAGCCCACTTTTCTGTAGGTTATATATTTACTTATGCGGCTTTCTTGATTGCCTCTACATCGGGCAAATTTGGT---

ATGTCACATTTCAGTAAAAATTTATGATACATGTATTGGGTGTACTCAATGTGTCCGAGCCTGCCCCACCGATGTGTTAGA  
AATGATACCTTTGGGATGGATGTAAAGCTAAGCAAATTGCTTCCGCTCCAAGAACAGAAGATTGTGTTGGTTGTAAGAGAT  
GTGAATCCGCTTGTCCAACGGATTTCTTGAGCGTTCGAGTTTATTTATGGCATGAAACAACCTCGAAGTATGGGTCTAGCT  
TAT---

ATGACAACCTTTTCAGCAGTTTTCCCTCTATTTTTGTGCCTTTAGTAGGCCTAGTATTTCCGGCAATTGCAATGGCTTCTTT  
ATCTTTGTATGTTCAAAAACTAAGATTTTT---ATGCGAGATCTAAAAACATATCTTTCC---

GTAGCACC GG TACTAAGTACTCTCTGGTTCGGTTCTTTAGCGGGTTTATTGATAGAGATCAATCGTTTCTTCCCGGATGC  
GTTAACATTCCCTTTTTTTT-----

ATGACTGCAATTTTAGAGAGACGCGAAAGCCTATGGGGTCGCTTCTGTAAGTGGATAACCAGCACTGAAAACCG  
TCTTTACATCGGATGGTTTGGTGTTTTGATGATCCCTACCTTATTGACC GCAACTTCTGTATTTATTATCGCCTTCATTG  
CTGCTCCTCCAGTAGATATTGATGGTATTCGTGAACCTGTTTCTGGATCTCTACTTTACGGAACAATATTATTTCTGGT  
CGCATTATTTCTACTTCTGCAGCTATAGGTTTGCACCTTTTACCCGATCTGGGAAGCGGCATCTGTTGATGAATGGTTATA  
CAATGGCGGTCTTATGAGTTAATTGTTTTACACTTCTTACTTGGTGTAGCTTGTACATGGGTCTGAGTGGGAACCTTA  
GTTTCCGCTCGGGTATGCGCCCTTGGATCGCTGTTGCATATTCAGCTCCTGTTGCAGCTGCTACCGCTGTTTTCTTGATC  
TATCCAATTGGTCAAGGAAGTTTTTCTGATGGTATGCCCTAGGAATCTCTGGTACTTTCAACTTCATGATTGTATTCCA  
GGCTGAACACAACATCCTTATGCATCCGTTTACATGTTAGGTGTAGCTGGTGTATTTCGGCGGCTCCCTATTCAGTGCTA  
TGCATGGTTCCTTGGTAACCTCTAGTTTGTATCAGGGAAACCACAGAAAATGAATCTGCTAATGAAGGTTACAGATTCCGT  
CAAGAGGAAGAAACTTATAATATCGTAGCTGCTCATGGTTATTTTGGCCGATTGATCTTCCAATATGCTAGTTTCAACAA  
TTCTCGTTCTTTACATTTCTTCTTAGCTGCTTGGCCTGTAGTAGGTATCTGGTTCACCGCTTTAGGTATTAGCACTATGG  
CTTTCAACCTAAACGGTTTTCAATTTTAAACCAATCCGTAGTTGATAGTCAAGGTCGTGTAATTAATACCTGGGCTGATATT  
ATTAACCGTGCTAACCTTGGTATGGAAGTTATGCATGAACGTAATGCTCATAACTTCCCTCTAGACCTA---

GCTGCTATTGAAGCTCCATCTACAAATGGA---

ATGGGTTTGCCTTGGTATCGTGTTCATACTGTGCTATTGAATGATCCCGGTCGCTTGCTTTCTGTTTCATATAATGCATAC  
GGCTCTGGTTGCTGGTGGGCCGGTTCAATGGCTCTATATGAATTAGCCGTTTTTGTATCCCTCCGATCCCGTTCTTGATC  
CAATGTGGAGACAAGGTATGTTTCGTTATACCCTTCATGACTCGTTTAGGAATAACCAATTCATGGGGCGGTTGGAGTATT  
ACAGGGGGGACTATAACAAATCCGGGTATTTGGAGTTACGAAGGTGTGGCCGGAGCACATATTGTGTTTTCTGGCTTGTG  
CTTCTTGGCAGCTATCTGGCATTGGGTATATTGGGATCTAGAAAATTTTTTGTGATGAGCGCACAGGAAAACCTTCTTTGG  
ATTTGCCCAAGATTTTGAATTCATTTATTTCTCTCAGGAGTGGCTTGTCTTTGGCTTTGGCGCATTTTCATGTAAACGGA  
TTGTATGGTCTGGAATATGGGTGTGCGACCTTATGGACTAATGGCAAGGTCCAACCTGTAATTCGGCGTGGGGCGT  
GGAAGGTTTTGATCCTTTTTGTTCCGGGAGGAATAGCCTCTCATCATATTGCAGCAGGGACATTTGGGCATATTAGCGGGCT  
TATTCATCTTAGTGTCCGCCCGCCCAACGTTTATACAAAGGATTACGTATGGGAAATATTGAAACCGTCTTTTCCAGT  
AGTATAGCTGCTGTCTTTTTTGCAGCTTTTGTGTTGCCGGAACCTATGTGGTATGGTTCAGCAACTACCCCATCGAATT  
ATTTGGTCTACTCGTTATCAATGGGATCAAGGATACTTCCAGCAAGAAATATATCGAAGGGTTAGTGTGGGTTAGCCG  
AAAATCAAAGTTTATCAGAAGCTTGGTCTAAAATTCCTGAAAAATTAGCTTTTTTATGATTACATTGGCAATAATCCGGCA  
AAAGGAGGATTATTTCAGAGCGGGTTCAATGGACAACGGGGATGGAATAGCCGTTGGGTGGTTAGGGCACCTATCTTTAG  
AGATAAAGACGGGCGTGAACCTTTTTGTACGTCGTATGCCTACTTTTTTTGAAACATTTCCGGTTGTTTTGGTAGACGGAG  
ACGGAATTGTTAGAGCGGATGTCCCTTTTAGAAGGGCAGAATCAAAGTATAGTGTGCAACAAGTAGGTGTAAGTGTGAG  
TTCTATGGCGGCGAACTCAATGGAGTGAGTTATAGTGATCTGCTACTGTGAAAAAATATGCTAGACGTGCTCAATTGGG  
TGAAATTTTTGAATTAGATCGTGCTACTTTGAAATCCGATGGTGTTTTTCGTAGCAGTCCGAGGGGTTGGTTTTACTTTTG  
GGCATGCTTCGTTTGCCTTGTCTTTCTTTCGGACACATTTGGCATGGTGTGCTAGAACCCTGTTTCAGAGATGTTTTTGC  
GGTATTGATCCAGATTTGGATGCTCAAGTGAATTTGGAGCATTCCAAAAA---

CTTGGAGATCCAAC TACAAGAAGACAAGTA---GTC-----

ATGAAAACCTTATATTCCTGAGGAGGTTCTACCCCGTGGAACGCTCTTTAATGGAACCTTTAGCTTTAGCCGGTCGTGA  
CCAAGAAACCACCGGTTTCGCTTGGTGGGCCGGGAATGCCCGGCTTATCAATTTATCCGGTAAACTATTGGGGGCTCATG  
TAGCCCATGCCGATTAATCGTATTCTGGGCCGGAGCAATGAACCTATTTGAAGTGGCTCATTTTGTCCCAGAAAAACCC  
ATGTACGAACAAGGATTAATTTACTTCCCCACCTAGCTAC

Helianthus GTCGCTATTCTGCATCC---

AGAGGGGAGTCCGTTTCGATGGAATAATTTCTTAGATGTATTACCACATCCCCAAGGGTTAGGCCCACTTTTTACAGGTCA  
GTGGAATCTTTATGCTCAAAATCCCGATTCAAGTAGTCATTTATTTGGTACCTCCAAGGAGCAGGAACTGCCATTTTAA  
CCCTTCTCGGGGATTCCATCCACAAACCCAAAGTTTATGGCTGACTGATATGGCTCATCATCATTTAGCTATTGCATTT  
ATTTTTCTCATTGCTGGGCATATGTATAGAACTAATTTTGGGATTGGGCACAGTATGAAAGATCTTTTAGATGCACATAT  
CCCTCCGGGAGGGCGATTGGGACGTGGGCATAAGGGCCTTTATGACACAATTAATAATTCGATTCAATTTCAATTAGGCC  
TTGCTCTAGCTTCTTTAGGGGTTATTACTTCTTTGGTAGCTCAACACATGTACTCTTTACCCGCTTATGCATTTATAGCA  
CAAGACTTTACTACTCAAGCTGCGTTATATACTCATACCAATACATCGCAGGATTCATCATGACAGGAGCTTTTGTCTCA  
TGGAGCTATATTTTTTATTAGGGATTACAATCCGGAACAGAATGAGGATAATGTATTGGCAAGAATGTTAGAACATAAAG  
AAGCTATCATATCTCATTTAAGTTGGGCCAGTCTCTTTTTGGGTTTCCATACCTTGGGACTTTATGTTTCATAATGATGTC  
ATGCTTGCCTTTGGTACTCCGGAGAAGCAAATCTTAATCGAACCTATATTTGCTCAATGGATACAATCTGCTCATGGTAA

AACTTCATATGGGTTTCGATATACTTTTTATCTTCAACGAGTGGCCCGGCATTCAATGCGGGTTCGAAGCATATGGTTGCCGG  
GTTGGTTAAATGCTGTTAATGAGAATAGTAATTCCTTAAACAATAGGTCCTGGAGACTTTTTGGTTTCATCATGCT  
ATTGCTCTAGGTTTACATACAACACTACGTTGATCTTAGTAAAAGGTGCGTTAGATGCACGTGGTTCCAAGTTAATGCCAGA  
TAAAAAGGATTTTTGGTTATAGTTTTCCGTGCGATGGCCCAGGACGAGGCGGTACTTGTGATATTTCCGGCTTGGGACGCAT  
TTTTTTGGCAGTTTTTTGGATGTTAAATACCATTGGATGGGTTACTTTTTATTGGCATTGGAAGCACATTACATTATGG  
CAGGGTAATGTTTTACAGTTTTAATGAATCTTCCACTTATTTGATGGGCTGGTTAAGAGATTATTTATGGTTAAACTCTTC  
ACAACCTATTAATGGATATAATCCTTTTGGTATGAATAGTTTATCCGTCTGGGCATGGATGTTTTTATTTGGACATCTTG  
TTTGGGCTACTGGATTTATGTTTTTAATTTTCTGGCGTGGATATTGGCAGGAATTGATTGAAACTTTAGCATGGGCTCAT  
GAACGCACACCTTTGGCCAATTTGATTTCGTTGGAGAGATAAACCGGTGGCACTTTCCATTGTACAAGCAAGATTGGTTGG  
ATTAGCCCCTTTTCTGTAGGTTATATATTTACTTATGCAGCTTTCTTGATTGCCTCTACATCAGGGAAATTTGGTTAAA  
TGTCGCATTCAGTAAAGATTTATGATACATGTATCGGGTGTACTCAATGTGTCCGAGCCTGTCTACGGATGTATTAGAA  
ATGATACCTTTGGGACGGATGTAAGCCAAACAATAAGCTTCTGCTCCAAGAACAGAGATTGTGTCCGTTGTAAGAGATG  
TGAATCCGCCTGCCCAACAGATTTCTTGAGTGTTCCGCTTTATTTATGGCATGAAACAACCCGCAGCATGGGTATAGCTT  
ATTAATGACAACCTTTAAC---  
TTTCCCTCTGTTTTGGTCCCTTTAGTAGGCCTAGTATTTCCGGCAATCGCAATGGCTTCTTTATTTCTTCATGTTCAAAA  
AAACAAGATTGTTTAGATGCGAGATCTAAAAACATATCTTTCC---  
GTGGCACCGGTACTAAGTACTCTATGGTTCGGTGTCTTTGGCAGGTTTTATTGATAGAGATTAATCGTTTTTTCCCGGATGC  
ATTGACGTTCCCTTTTTCTAG-----  
ATGACTGCAATTTTAGAGAGACGCGAAAGCGAAAGCCTATGGGGTCGCTTCTGTAACCTGGATAACTAGCACCGAAAACCG  
TCTTTACATTGGATGGTTTTGGCGTTTTGATGATCCCTACCTTATTGACCGCAACTTCTGTATTTATTATCGCCTTCATTG  
CTGCTCCTCCAGTAGATATTGATGGTATTCGTGAACCTGTTTTCTGGATCTCTACTTTACGGAAACAATATTATTTCCGGT  
GCCATTATTCCTACTTCTGCAGCTATCGGTTTGCACTTTTACCCAATATGGGAAGCAGCATCCGTTGATGAATGGTTATA  
CAATGGTGGTCCTTATGAACATAATTGTTCTACACTTCTTACTTGGTGTAGCTTGTACATGGGTGCTGAGTGGGAGCTTA  
GTTTCCGTCTGGGTATGCGACCTTGGATTGCTGTTGCATATTCAGCTCCTGTTGCAGCTGCGACTGCTGTTTTCTTGATC  
TACCCAATTGGTCAAGGAAGCTTTTTCTGATGGTATGCCTCTAGGAATTTCTGGTACTTTCAACTTCATGATTGTATTCCA  
GGCTGAGCACAACATTCTTATGCACCCATTTACATGCTAGGCGTAGCTGGTGTATTCGGCGGCTCCCTATTTAGTGCTA  
TGCATGGTTCCTTGGTAACCTCTAGTTTGTATCAGGGAAACCACAGAAAATGAATCTGCTAATGAAGGTTACAGATTCCGT  
CAAGAGGAAAGAACTATAATATCGTAGCCGCTCATGGTTATTTTGGCCGATTGATCTTCCAATATGCTAGTTTCAACAA  
CTCTCGTTCTTTACATTTCTTCTTAGCTGTCTGGCCTGTAGTAGGTTATCTGGTTCACTGCTTTAGGTATCAGTACTATGG  
CTTTCAACCTAAATGGTTTTCAATTTCAACCAATCAGTAGTTGATAGCCAAGGCCGTGTTATTAACACTTGGGCTGATATC  
ATTAACCGTGCTAACCTTGGTATGGAAGTTATGCATGAACGTAATGCTCATAATTTCCCTCTAGACTTA---  
GCTGCTATTGAAGCTCCATCTACAAATGGATAAATGGGTTTTGCCTTGGTATCGTGTTTCATACCCTTGTATTGAATGATCC  
CGGACGGTTGCTTTCTGTTTCATATAATGCATACAGCTTTGGTTGCTGGTTGGGCGGTTTCGATGGCCCTGTATGAATTAG  
CAGTTTTTGTATCCTTCTGACCCTGTTCTTGTATCCAATGTGGAGACAGGGTATGTTTCGTTATACCCTTCATGACTCGTTTA  
GGAATAACAAATTCCTGGGGCGGTTGGAGTATCACGGGGGGACTATAACGAATCCGGGTATTTGGAGTTACGAAGGTGT  
GGCTGGAGCGCATATTGTGTTTTCTGGGTTGTGCTTTTTGGCAGCTATCTGGCATTGGGTATATTGGGATCTAGAAATAT  
TTTGTGATGAACGTACAGGAAAACCTCTTTGGATTTGCCAAGATCTTTGGAATACATTTATTTCTTGCAGGTCTGGCT  
TGCTTTGGTTTTGGTGCATTTTCATGTAACAGGCTTGTATGGTCTGGCATATGGGTGTCCGATCCTTATGGGCTAACAGG  
GAAAGTACAATCTGTAATCCATCGTGGGGTGTAGAGGGTTTTGATCCTTTTGTCCGGGAGGAATAGCCTCTCATCATA  
TTGCGGCAGGGACTTTGGGCATATTAGCAGGTCTATTCCATCTTAGCGTCCGCCCGCCCAACGTCTATACAAAGGATTG  
CGTATGGGCAATATTGAAACTGTCCTTTCCAGTAGTATCGCTGCTGTCTTTTTTGCAGCTTTTGTGTTGCCGGAACAT  
GTGGTATGGTTCAGCAACTACCCCATCGAATTATTTGGGCCTACTCGTTATCAATGGGATCAGGGATACTTCCAACAAG  
AAATATATAGAAGAGTTAGTGCTGGGTTAGCCGAAAATCAAAGTTTATCAGAAGTTTGGTCTAAAATTCCTGAAAAATTA  
GCCTTTTATGATTACATCGGAAATAATCCGGCAAAAGGGGATTATTCAGGGCGGGCTCAATGGATAACGGGGATGGAAT  
AGCGGTTGGATGGTTAGGACATCCTATCTTTAGAGATAAAGAAGGCCGTGAACTTTTGTACGTCGTATGCCTACCTTTT  
TTGAAACATTTCCGGTCTTTTTGGTAGACGGAGACGGAATTGTTAGAGCCGATGTTCTTTTTCGAAGGGCGGAATCTAAG  
TATAGTGTGCAACAAGTAGGTGTAACCTGTTGAGTTCTATGGTGGTGAACCTCAATGGAGTCAGTTATAGTGATCCTGTTAC  
TGTCAAAAAATATGCTAGACGCGCTCAATTTGGGGGAAATTTTTGAATTAGATCGTGCTACTTTGAAATCTGATGGTGT  
TTTCGTAGCAGTCCAAGGGGTTGGTTTTACTTTTTGGACATGCTTCATTTGCTTTGCTCTTCTTCTTCGGACACATTTGGCAT  
GGTTCTCGAACCTTGTTTAGAGATGTTTTCGCTGGTATTGACCCAGATTTGGATGCTCAAGTAGAATTTGGAGCATTCCA  
AAAA---CTTGGAGATCCAACCTACAAGAAGACAAGCA---ATCTGA---  
ATGAAAACCTTATATTCCCTGAGGAGGTTCTACCCCGTGGAAACGCTCTTTAATGGAACCTTTAGCTTTAGCTGGTCTGTGA  
CCAAGAAACCACCGGTTTTCGCTTGGTGGGCGGGGAATGCCCGGCTTATCAATTTATCCGGTAAACTACTAGGGGCTCATG  
TAGCCCATGCCGATTAATCGTATTCTGGGCCGGAGCAATGAATCTATTTGAAGTGGCTCATTTTCGTACCAGAAAAGCCT  
ATGTATGAACAAGGATTAATTTTACTTCTCACCTAGCTAC  
Illicium           GTCGCTATTCCCGGATCA---  
AGGGGGGAGTACGTGAGATGGAACAATTTCTTAGATGTATTACCATATCCCAAGGGTTGGGTCCACTTTTTACAGGCCA

GTGGAATCTTTATGCCCAAACCCCGATTCCAGTAGTCATTTATTTGGTACCTCCCAAGGAGCGGGAACGGCCATTTTAA  
CCCTTCTCGGGGATTCCATCCACAACTCAAAGTTTATGGCTGACCGATATTGCTCATCATCATTTAGCTATTGCATTT  
GTTTTTCTCGTTGCTGGTCATATGTATAGGACTAACTTCGGGATTGGGCACAGTATGAAAGATCTTTTAGAAGCACATAT  
TCCTCCGGGGGTCGATTGGGGCGCGGACATAAGGGTCTTTATGACACAATAAATAAATTCGATTCATTTTCAATTAGGTC  
TTGCTCTAGCCTCTTTGGGGGTTATTACTTCTTTGGTAGCTCAACATATGACTCTTTACCTGCTTATGCATTCATAGCA  
CAAGACTTTACTACTCAAGCTGCGTTATATACTCATACCAATACATCGCAGGGTTCATTATGACAGGAGCCTTTGCTCA  
TGGAGCTATATTCTTCATTAGAGATTACAATCCGGAACAGAATGAGGATAATGTATTGGCAAGAATGTTAGACCATAAAG  
AAGCTATCAAATCTCATTAAAGTTGGGCCAGCTTGTTTCTGGGTTTCCATACCTTGGGACTCTATGTTTATAACGACGTC  
ATGCTTGCTTTTGGTACTCCAGAGAAAACAAATCTTGATCGAACCACATATTGGCCCAATGGATAACAATCTGCTCATGGTAA  
GACTTCATATGGGTTTCGATGTACTCTTATCTTCAACGAATGGCCAGCATTCAATGCCGGTCGAAGCATATGGTTACCTG  
CTGGTTGAATGCTATTAATGAGAATGGTAATTCACTATTCTTAAACAATAGGTCTTGGAGACTTCTGGTCCATCATGCT  
ATTGCTCTAGGTTTGCATACAACACTACATTGATCTTAGTAAAAGGTGCTTTAGATGCACGCGGCTCCAAGTTAATGCCAGA  
TAAAAAAGATTTTCGGTTATAGTTTCCCTTGTGATGGTCCGGGGCGGGCGGTACTTGTGATATTTTCGGCTTGGGACGCAT  
TTTATTTGGCAGTTTTCTGGATGTTAAATACCATTGGATGGGTTACTTTTTATTGGCATTGGAAACATATCACATTATGG  
CAGGGTAACGTTTTACAATTTAATGAATCCTCCACTTATTTGATGGGATGGTTAAGAGATTATCTATGGTTAAACTCTTC  
ACAACCTATCAATGGATATAACCCTTTTGGTACGAATAGTTTATCTGTCTGGGCGTGGATGTTCTATTTGGGCATCTTG  
TTTGGGCTACTGGATTATGTTCTTAAATTTCCCTGGCGTGGATATTGGCAGGAATTGATTGAAACTTTAGCATGGGCTCAT  
GAACGCACACCTTTGGCTAATTTGATTTCGATGGAGAGATAAACCGGTGGCTCTTTCCATTGTGCAAGCAAGATTGGTAGG  
CTTAGCCACTTTTCTGTAGGTTATATATTTCACTTATGCAGCTTTCTTGATTGCCTCTACATCAGGCAAATTTGGT---  
ATGTCACATTCAGTAAAAATTTATGATACATGTATAGGGTGTACTCAATGTGTACGAGCCTGCCCCACAGATGTATTGGA  
AATGATACCTTTGGGACGGATGTAAAGCTAAGCAAATTTGCTCCTGCTCCAAGAACGGAGGACTGTGTAGGTTGTAAGAGAT  
GTGAATCTGCTTGTCCAACAGATTTCTTGAGTGTACGAGTTATTTATGGTATGAGACAACCTCGCAGCATGGGTCTAGCT  
TAT---ATGACAGATCTTAAC---  
TTACCCTCTATTTTTGTGCCTTTAGTAGGCCTATTATTTCCGGCAATTGCAATGGCTTCTTTATCTCTTCATGTTCAAAA  
AAACAAGATTGTC---ATGCGAAATATAAAAAACATATCTCTCC---  
GTGGCACCTGTGCTAGCTACTCTATGGTTTCGGGTCTTTAGCAGGTCTATTGATAGAGATCAATCGTTTTATTCCCGGATGC  
GTTGGCATTCCCCTTTTTCTCATT---  
ATGACTGTAATTTTAGAGAGACGCGAAAGCACAAGCCTATGGGGTTCGCTTCTGTAACCTGGATAACCAGCACTGAAAACCG  
TCTTTACATTTGGATTGGTTTCGGTGTTTTGGATGATCCCTACCTTATTGACCGCAACTTCTGTATTTATTATCGCCTTCATTG  
CTGCTCCTCCAGTAGATATTGATGGTATTCGTGAACCTGTTTCTGTTTCTACTTTTATGGAAACAATATTATCTCTGGT  
GCAATTAATCCCACTTCTGCAGCTATAGGCTTGCATTTTTACCCGATATGGGAAGCAGCGTCCGTTGATGAATGGTTATA  
CAACGGTGGTCCTTATGAGCTAATTGTTCTACACTTCTTACTTGGTGTAGCTTGTACATGGGTGCTGAGTGGGAACCTTA  
GTTTCCGTCTAGGTATGCGCCCGTGGATTGCTGTTGCATATTCAGCTCCTGTTGCAGCTGCTACTGCTGTTTTCTTGATC  
TACCCTATTGGTCAAGGAAGCTTCTCTGATGGTATGCCCTAGGAATATCTGGTACTTTCAACTTCATGATTGTATTCCA  
GGCTGAACACAACATCCTTATGCATCCATTTACATGTTAGGTGTAGCTGGTGTATTTCGGCGGCTCCCTATTAGTGCTA  
TGCATGGTTCTTTGGTAACTCTAGTTTGTATCAGGGAAACCCTGAAAATGAGTCTGCTAATGCAGGTTACAGATTCCGT  
CAAGAGGAAGAACTTATAATATCGTAGCTGCTCATGGCTATTTTGGCCGATTAATCTTCCAATATGCTAGTTTCAACAA  
TTCTCGTTTCTTACATTTCTTCTAGCTGCTTGGCCTGTAGTAGGCATCTGGTTTACCCTTTAGGTATCAGCACCATGG  
CTTTCAACCTAAATGGTTTTCAATTTCAACCAATCCGTAGTTGACAGTCAAGGTCGTGTCATTAACACTTGGGCTGATATC  
ATCAATCGTGCTAACCTTGGTATGGAAGTTATGCATGAACGTAATGCTCACAACTTCCCCTAGACTTA---  
GCTGCTGTGCAAGCTCCGTCTATAAACGGA---  
ATGGGTTTGCCTTGGTATCGTGTTTCATACCGTTCGATTTGAATGATCCTGGTTCGGTTGCTTTCTGTCCATATAATGCATAC  
AGCTCTAGTTTCTGGTTGGGCCGGTTCGATGGCTCTATACGAATTAGCGGTTTTTGTATCCCTCTGATCCCCTTCTTGATC  
CAATGTGGAGACAAGGTATGTTTCGTTATACCCTTCATGACTCGTTTAGGAATAACCAATTCATGGGGTGGATGGAGTATT  
ACCGGAGGAACATAACGAATCCGGGTATTTGGAGTTACGAGGGTGTGGCCGGGGCACATATTGTGTTTTCTGGCCTGTG  
CTTCTTGGCAGCTATCTGGCATTGGGTGTACTGGGACCTAGAAATATTTCTGTGATGAACGTACGGGAAAACCTCTTTGG  
ATTTGCCAAGATCTTTGGAATTCATTTATTTCTCTCAGGGGTGGCTTGTCTTTGGGTTTGGCGCATTTTCATGTAACAGGC  
TTGTATGGTCTGGAATATGGGTGTCTGATCCTTATGACTAACCAGGAAAGTGAATCTGTAAATCCAGCGTGGGGCGC  
GGAAGTTTTGATCCTTTTGTTCGGGAGGAATAGCTTCTCATCATATTGCAGCGGGACTTTGGGTATATTAGCAGGTC  
TATTCCATCTTAGTGTCCGCCACCCCAACGTCTATACAAAGGATTACGTATGGGCAATATTGAAACTGTCTCTCCAGT  
AGTATAGCTGCTGTGTTTTTTGCGGCTTTCTGTTGTTGCTGGAACCTATGTGGTACGGTTCAGCAACGACTCCGATCGAATT  
ATTTGGTCCCCTCGTTATCAGTGGGATCAGGGATACTTCCAGCAAGAAATATATCGAAGAGTTGGTACCAGGCTAGCCG  
AAAATCTGAGCTTATCAGAAGCTTGGTCTAAAATTTCCCGATAAACTAGCTTTTTTATGATTACATCGGTAATAATCCGGCG  
AAGGGAGGATTATTCAGAGCGGGCTCAATGGACAACGGAGATGGAATAGCTGTTGGATGGTTAGGACACCCCATCTTTTCG  
AGATAAAGATGGGCATGAGCTTTTTGTACGACGTATGCCACTTTTTTTGAAACATTTCCAGTGGTTTTGGTAGATGGAG  
ACGGAATTTGTGAGAGCCGATGTTCTTTTAGAAGGGCGGAATCCAAGTATAGTGTGCAACAAGTAGGTGTAACCTGTTGAG  
TTCTATGGTGGCGAACTCAATGGAGTCAATTATGGCGATCCGGCTACTGTGAAAAAATATGCTAGACGTGCCCAATTGGG

TGAAATTTTTGAATTAGATCGTGCTACTTTGAAATCCGATGGTGTTTTTTCGTAGCAGTCCAAGAGGTTGGTTCACTTTTG  
GACATGCTTCGTTTGCTTTGCTCTTCTTTTTTCGGACACATTTGGCACGGCGCTAGAACCTTGTTTCAGAGATGTTTTTGCC  
GGTATTGACCCAGATTTGGATGCTCAAGTGAATTTGGAGCATTCCAAAAA---  
CTTGGAGATCCAACACTACAAGGAGACAAGTA---GTC-----  
ATGAAAACCTTATATTCCTGAGGAGGTTCTACCCCGTGAAACGCTCTTTAATGGAACCTTTAGCTTTAGCTGGTTCGTGA  
CCAAGAAACCACCGGTTTCGCTTGGTGGGCGGGGAATGCCCGACTTATCAATTTGTCTGGTAAACTACTCGGGGCTCACG  
TAGCCCATGCCGATTAATCGTCTTCTGGGCCGGAGCAATGAACCTATTTGAAGTGGCTCATTTTCGTACCAGAAAAGCCT  
ATGTATGAACAAGGATTGATTTTACTTCCCCATCTAGCTAC  
Jasminum GTCGCTATTCTGGATCC---  
AGAGGGGAGTATGTTTCGATGGAATAATTTCTTAGAGGTATTACCGCACCCACAAGGGTTAGGCCCACTTTTTACAGGTCA  
ATGGAATCTTTATGCTCAAAACCTGACTCAAGTAGTCATTTATTTGGGACCTCCAAGGAGCAGGAACCTGCCGTTCTAA  
CTCTTCTGGGGGATTCATCCACAAACCCAAAGTTTATGGCTGACCGATATTGCTCATCATCATCTAGCTATTGCATTT  
ATTTTTCTTGGTGGTTCATATGTATCGAACGAATTTTCGGGATTGGCCACAGTATCAAAGATCTTTTAGATGCACATAT  
TCCTCCGGGGGGCGGTTGGGACGAGGGCATAAGGGTCTTTATGACACAATCAATAATTCGCTTCATTTTCAATTAGGCC  
TTGCTTTAGCTTCTTTAGGGGTTATTACTTTCCTTAGTAGCTCAACACATGTACTCTTTACCTGCTTATGCATTCATAGCA  
CAAGACTTTACTACTCAAGCTGCATTATATACTCATCACCATATATCGCAGGATTCATCATGACAGGAGCTTTTGCTCA  
TGGAGCTATTTTTTTCATTAGAGATTACAATCCGGAGCAAAATGAAGATAATGTATTGGCAAGAATGTTAGACCATAAAG  
AAGCTATCATATCTCATTTAAGTTGGGCCAGCCTCTTTCTGGGATTCCATACCTTGGGACTTTATGTTTATAATGATGTC  
ATGCTTGCCCTTTGGTACTCCAGAAAAGCAAATTTTGATCGAACCCATATTTGCTCAATGGATAACAATCGGCTCATGGAA  
AACTTCCATGGGTTTCGATGTACTTTTATCTTCAACGAGCGGTCCGGCATTCAATGCGGGTCGAAACATCTGGTTGCCCG  
GTTGGTTAAATGCTATTAATGAAAATAGTAATTCACTCTTCTTAAACAATAGGTCCTGGAGACTTTTTGGTTTCATCATGCT  
ATTGCTCTGGGTTTACATACAACACTACATTGATCTTAGTAAAAGGTGCTTTAGATGCACGCGGTTCCAAGTTAATGCCAGA  
TAAAAGGATTTTCGGTTATAGTTTTCCATGCGATGGCCCCGGGACGGGGGGTACTTGTGATATTTCCGCATGGGACGCT  
TTTATTTGGCAGTTTTTTGGATGTTAAATACTATTGGATGGGTTACTTTTTATTGGCATTGGAAGCACATTACATTATGG  
CAGGGTAAACGTTTACAGTTTAAATGAATCTTCCACTTACTTGTAGGGTTGGCTAAGAGATTATTTATGGTTAAACTCTTC  
ACAACCTTATCAATGGATATAACCCTTTTGGTATGAATAGTTTATCGGTCTGGGCATGGATGTTCTTATTTGGACATCTTG  
TTTGGGCTACTGGATTTATGTTCTTAATTTCTGGCGTGGATATTGGCAGGAATTGATTGAAACCCCTAGCATGGGCTCAT  
GAGCGCACACCTTTGGCCAAATTTGATTTCGATGGAGAGATAAACCTGTGGCCCTTTCCATTGTCCAAGCAAGATAGTGGG  
ATTGGCCCACTTTTTCTGTAGGTTATATATTTACTTATGACGCTTTCTTGGATTGCCTCTACATCGGGCAAATTTGGCTAAA  
TGTACATCTCAGTAAAGATTTATGATACATGTATAGGATGTACTCAATGTGTCCGAGCGTGTCCCACCGATGTATTAGAA  
ATGATACCTTGGGACGGATGTAAAGCTAAACAAATAGCTTCTGCCCAAGGACCGAGGACTGTGTTGGTTGTAAGAGATG  
TGAATCCGCCTGTCCAACAGATTTCTTGAGTGTTTCGAGTTTATTTATGGCATGAAACAACCTCGAAGTATGGGTCTAGCTT  
ATTGAATGACAACCTTTCCAT---  
TTTTCTTCTATTTTTCGTGCCTTTAGTGGGCCTAGTATTTCCGGCAATTGCAATAGCTTCTTTATTTCTTCATGTTCAAAA  
AAACAAGATTGTTTAGATGCGAGATCTAAAAACATATCTCTCT---  
GTGGCACCAGTACTAAGTACGCTATGGTTCGGGGCTTTAGCAGGTTTATTGATAGAGATTAATCGTTTTTTCCCGGATGC  
TTTGACA-----  
CTTTCCCTTTAGATGACTGCAATTTTAGAGAGACCGGAAAGCGAAAGCCTATGGGGTCGCTTCTGTAACTGGATAACCAG  
CACCGAAAACCGTCTTTACATTGGATGGTTTTGGTGTTTTGTATGATCCCTACCTTATTGACCGCAACTTCTGTATTTATTA  
TTGCCCTTCATTGCTGCTCCTCCAGTAGATATTGATGGTATTCGTGAACCTGTTTCTGGATCTCTACTTTACGGAAACAAT  
ATTATCTCAGGTGCCATTATTCCTACTTCTGCAGCTATAGGTTTGCACCTTTTACCCAATCTGGGAAGCGGCATCCGTTGA  
TGAATGGTTATAACAATGGTGGTTCCTTATGAACTAATGTTTCTACACTTCTTACTTGGTGTAGCTTGTATATGGGTTCGTG  
AGTGGGAGCTTAGTTTTCCGTCTGGGTATGCGACCTTGGATTGCTGTTGCATATTCAGCTCCTGTTGCAGCTGCTACCGCT  
GTTTTCTTGATCTACCCAATTGGTCAGGGAAGTTTTTCTGATGGTATGCCTCTAGGAATTTCTGGTACTTTCAACTTCAT  
GATTGTATTCAGGCTGAGCACAACATCCTTATGCACCCATTTACATGTTAGGCGTAGCTGGTGTATTCGGCGGCTCCC  
TATTCAGTGTATGCATGGTTCCTTGGTAACTTCTAGTTTAAATCAGGGAAACCACAGAAAATGAATCTGCTAATGAAGGT  
TACAGATTCGGTCAAGAGGAAGAAAACCTTATAATATCGTAGCCGCTCATGGTTATTTTGGCCGATTAATCTTCCAATATGC  
TAGTTTCAACAACCTCTCGTTCGTTACACTTCTTCTAGCTGCTTGGCCTGTAGTAGGTATCTGGTTCACTGCTTTAGGTA  
TCAGCACTATGGCTTTCAACCTAAATGGTTTTCAATTTCAACCAATCTGTAGTTGATAGTCAAGGCCGTGTAATTAATACT  
TGGGCTGATATCATTAAACCGTGCTAACCTTGGTATGGAAGTTATGCATGAACGTAATGCTCATAACTTCCCTCTAGACCT  
A---  
GCTGCTATCGAAGCTCCATCTACAAATGGATAAATGGGTTTACCTTGGTATCGTGTTCATACCCTTGTATTAATGATCC  
CGGTTCGGTTGCTTTCCGTTTCATATAATGCATACAGCTCTGGTTGCTGGTTGGGCGGGTTCGATGGCTCTGTATGAATTAG  
CAGTTTTTGTATCCTTCTGACCCGGTTCTTGTATCCAATGTGGAGACAGGGTATGTTTGTATACCTTTTCATGACTCGTTTTA  
GGAATAACCAATTCATGGGGCGGTTGGAGTATCACAGGAGGTACTGTAACGAATCCGGGAATTTGGAGTTACGAAGGTGT  
AGCTGGGTACATATTTGTGTTTTTCGGGCTTATGCTTTTTTGGCAGCTATCTGGCATTGGGTCTATTGGGATCTAGAAATAT  
TTTGTGATGAACGTACAGGAAAACCTTCTTTGGATTTGCCCAAGATCTTTGGAATTCATTTATTTCTCTCAGGGGTGGCT

TGTTTTGGTTTTGGTGTATTTTCATGTAACAGGCTTGTATGGTCCTGGAATATGGGTGTCCGATCCTTATGGACTAACGGG  
AAAAGTACAACCTGTAAATCCGGCGTGGGGCGTGGAAAGGTTTTGATCCTTTTTGTTCCGGGAGGAATAGCTTCTCATCATA  
TTGCAGCAGGGACATTGGGCATATTAGCCGGTCTATTCCATCTTAGCGTCCGCCGCCACAACGTCTATACAAAGGATTA  
CGTATGGGAAATATTGAAACCGTACTTTCCAGTAGTATCGCGGCTGTTTTTTTTGCAGCTTTTGTGTTGCTGGAACAT  
GTGGTATGGTTCAGCAACAACCCCATCGAATTATTTGGGCCGACCCGTTATCAATGGGATCAGGGTTACTTCCAGCAAG  
AGATATACCGAAGAGTTAGTGCTGGGCTAGCAGAAAATAAAAGTTTATCAGAAGCGTGGTCTAAAATTTCCCGAAAAATTA  
GCTTTTTATGATTATATCGGCAATAATCCGGCAAAGGGAGGATTATTCAGGGCGGGCTCAATGGATAACGGAGATGGAAT  
AGCGGTTGGATGGTTAGGACACCCTATCTTTAGAGATAAAGAGGGGGCGTGAACCTTTTTGTACGCCGTATGCCTACTTTTT  
TTGAAACATTTCCGGTCGTTTTGGTAGACGGCGACGGAATTGTTAGAGCTGATGTTCCTTTTCGAAGGGCAGAGTCGAAG  
TATAGTGTGAACAAGTAGGTGTAACCTCTTGAGTTCTACGGCGGCGAACTCAATGGAGTCAGTTATAGTGATCCTGCTGT  
TGTGAAAAAATATGCTAGACGCGCTCAATTGGGCGAAATTTTTGAGTTAGATCGTGCTACTTTGAAATCCGATGGTGT  
TTCGTAGCAGTCCAAGAGGTTGGTTACTTTTTGGTCATGCTTTCGTTTTGCTTTCTTTCTTCGGACACATTTGGCAT  
GGTGCTAGAACCTTGTTTAGGGATGTTTTTGCCGGTATTGACCCAGATTTGGATGCTCAAGTAGAGTTTGGAGCATTTCCA  
AAAA---CTCGGGATCCAACCTACCAGAAGAGAGGTA---GTCTGA---  
ATGAAAACCTTATATTCCCTGAGGAGGTTCTACCACGTGGAAACGCTCTTTAATGGAACCTTTAGCTGTAACGGTCTGTA  
CCAAGAAACCACCGGTTTTGCTTGGTGGGCCGGGAATGCTCGACTTATTAATTTATCCGGTAAACTACTAGGAGCTCATG  
TAGCCCATGCCGATTAATCGTATTCTGGGCCGGAGCAATGAACCTATTTGAAGTGGCTCATTTTCGTACCAGAGAAGCCT  
ATGTATGAACAAGGATTAATTTTTACTTCCCCATCTAGCTAC  
Lactuca           GTCGCTATTCTGCATCC---  
AGAGGGGAGTACGTTTCGATGGAATAATTTCTTAGATGTATTACCACATCCCCAAGGATTAGGCCCACTTTTTACAGGTCA  
GTGGAATCTTTATGCTCAAAATCCCATTAGGTTAGTCAATTTATTTGGTACCTCCAAGGAGCAGGAACCTGCCATTTTAA  
CCCTTCTCGGGGATTCCATCCACAAACCCAAAGTTTTATGGCTGACTGATATGGCTCATCATCATTTAGCTATTGCATTT  
CTTTTTCTTATTGCTGGGCATATGTATAGAATAATTTGGGATTGGGCACAGTATGAAAGATCTTTTAGATGCACATAT  
CCCTCCGGGAGGGCGATTGGGACGTGGGCATAAGGGCCTTTATGACACAATTAATAATTCGCTTCATTTTTCAATTAGGCC  
TTGCTCTAGCTTCTTTAGGGGTTATTACTTCTTTGGTAGCTCAACACATGTACTCTTTACCCGCTTATGCATTTATAGCA  
CAAGACTTTACTACTCAAGCTGCATTATATACTCATCACAATACATTGCAGGATTATCATGACAGGAGCTTTTGCTCA  
TGGAGCTATATTTTTATTAGGGATTACAATCCGGAACAGAATGAGGATAATGTATTGGCACGAATGTTAGAACATAAAG  
AAGCTATCATATCTCATTTAAGTTGGGCCAGCTCTTTTTGGGTTCCATACTTTGGGACTTTATGTTTATAATGATGTC  
ATGCTTGCCTTTTGGTACTCCGGAGAAGCAAACTTTAATCGAACCTATTTGCTCAATGGATACAATCTGCTCATGGTAA  
AACTTCATATGGGTTTCGATATACTTTTTATCTTCAACGAATGGCCCGGACTTCAATGCGGGTCAAGCATATGGTTGCCGG  
GTTGGTTAAATGCTATTAATGAGAATAGTAATTCACTATTCTTAAACAATAGGTCCTGGGGACTTTTTGGTTTCATCATGCT  
ATTGCTCTGGGTTTACATACAACTACGTTGATCTTAGTAAAAGGTGCGTTAGATGCGCGTGGTTCCAAGTTAATGCCAGA  
TAAAAGGATTTCCGTTATAGTTTTCCGTGCGATGGCCCAGGACGAGGCGGTACTTGTGATATTTCCGGCTTGGGACGCAT  
TTTTTTGGCAGTTTTTTGGATGTTAAATACCATTGGATGGGTTACTTTTTATTGGCATTGGAAGCACATTACATTATGG  
CAGGGTAATGTTTCGCAGTTTAAATGAATCTTCCACTTATTTGATGGGCTGGTTAAGAGATTATTTATGGTTAAACTCTTC  
ACAACCTATTAATGGATATAACCCTTTTGGTATGAATAGTTTATCAGTCTGGGCATGGATGTTTTTATTTGGACATCTGG  
TTTGGGCTACTGGATTTATGTTTTTAAATTTCCGTGGCGTGGATATTGGCAGGAATTGATTGAAACTTTAGCATGGGCTCAT  
GAACGCACACCTTTGGCCAATTTGATTGTTGGAGAGATAAACCAGGTGGCACTTTCCATTGTACAAGCAAGATTGGTTGG  
ATTAGCCCACTTTTCTGTAGGTTATATATTTACTTATGCAGCTTTCTTGATTGCCTCTACATCAGGGAAATTTGGTTAAA  
TGTCACATTCAGTAAAGATTTATGATACATGTATCGGGTGTACGCAATGTGTCCGAGCCTGTCCCACGGATGTATTAGAA  
ATGATACCTTGGGATGGATGTAAAGCCAAACAAATAGCTTCCGCTCCAAGAACAGAGGATTGTGTCCGGTTGTAAGAGATG  
TGAATCCGCCTGCCCAACAGATTTCTTGAGTGTTCGAGTTTATTTATGGCATGAAACAACCCGCAGCATGGGTATAGCTT  
ATTAATGACAACCTTTAAC---  
TTTCCCTCTGTTTTGGTGCCTTTAGTAGGCCTAGTATTTCCGGCAATCGCAATGGCTTCTTTATTTCTTCATGTTCAAAA  
AAACAAGATTGTTTAGATGCGAGATCTAAAAACATATCTTTCC---  
GTAGCACCGGATTAAGTACTCTATGGTTCGTTCTTTGGCAGGTTTTATTGATAGAGATTAATCGTTTTTTCCCGGATGC  
GTTGACGTTCCCCTTTTTTTTCAATTTAGATGACTGCAATTTTAGAGAGACGCGAAAGCGAAAGCCTATGGGGTTCGCTTCT  
GTAACGGATAACCAGCACCAGAAACCGTCTTTACATTTGATGGTTTTGGTGTGTTTATGATGATCCCTACCTTATTGACCGCA  
ACTTCTGATTTTATTATCGCCTTCATTGCTGCTCCTCCAGTGGATATTGATGGTATTTCGTAACCTGTTTCTGGATCTCT  
ACTTTATGGAAACAATATTTTTCAGGTGCCATTATTCCTACTTCTGCAGCTATAGGTTTGCATTTTTACCCAATATGGG  
AAGCAGCATCCGTTGATGAATGGTTATAACAATGGTGGTCTTATGAACTAATTGTTTCTACACTTCTTACTTGGTGTAGCT  
TGTTACATGGGTCGTGAGTGGGAGCTTAGTTTTCCGTCTGGGTATGCGACCTTGGATTGCTGTTGCATATTCAGCTCCTGT  
TGCAGCTGCGACTGCTGTTTTCTTGATCTACCCAATTTGGTCAAGGAAGCTTTTTCTGATGGTATGCCTCTAGGAATTTCTG  
GTACTTTCAACTTCATGATTGATTCCAGGCTGAGCACAACATCCTTATGCACCCATTTACATGCTAGGCGTAGCTGGT  
GTATTCGGCGGCTCCCTATTTAGTGCTATGCATGGTCTTTGGTAACTCTAGTTTGATCAGGGAAACCACAGAAAATGA  
ATCTGCTAATGAAGGTTACAGATTCGGTCAAGAAGAAGAACTTATAATATCGTAGCCGCTCATGGTTATTTTGGCCGAT  
TGATCTTCCAATATGCTAGTTTCAACAACCTCTCGTTCTTTACATTTCTTCTAGCTGCTTGGCCTGTAGTAGGTATCTGG



TTCCTGCTTTAGGTATCAGCACTATGGCTTTCAACCTAAATGGTTTTCAATTTCAACCAATCGGTAGTTGATAGTCAAGG  
CCGTGTAATTAATACTTTGGGCTGATATCATTAAACCGTGTAACTTTGGTATGGAAGTTATGCATGAACGTAATGCTCATA  
ATTTCCCTCTAGACTTA---  
GCTGCTATCGAAGCTCCATCTACAAATGGATAAATGGGTTTTGCCTTGGTATCGTGTTCATACCGTTGTATTGAATGATCC  
CGGACGGTTGCTTTCTGTTTCATATAATGCATACAGCTTTGGTTGCTGGTTGGGCGGTTCTATGGCCCTGTATGAATTAG  
CAGTTTTTGTATCCTTCTGACCCTGTTCTTGTATCCAATGTGGAGACAGGGTATGTTTCGTTATACCCCTTCATGACTCGTTTTA  
GGAATAACCAATTCATGGGGTGGTTGGAGTATCACGGGGGGGACTATAACCAATCCGGGTATTTGGAGTTACGAAGGTGT  
GGCCGGAGCGCATATTGTGTTTTCTGGGTTGTGCTTTTTGGCAGCTATCTGGCATTGGGTGTATTGGGATCTAGAAATAT  
TTTTCTGATGAACGTACAGGAAAACCTTCTTTGGATTTGCCAAGATCTTTGGAATACATTTATTTCTTGCAGGTGTGGCT  
TGCTTTGGTTTTGGTGCATTTACGTAACAGGTTTGTATGGTCTGGCATAATGGGTGTCCGATCTTATGGACTAACAGG  
AAAAGTACAAGCTGTAATCCATCGTGGGGTGTGGAGGGTTTTGATCCTTTTGGTTCCGGGAGGAATAGCTCTCATCATA  
TTGCGCGAGGACTTTGGGCATATTAGCAGGCTATTCCATCTTAGTGTCCGCCCCCAACGTCTATACAAAGGATTG  
CGTATGGCAATATTGAAACTGTCTTTCCAGTAGTATCGCTGCTGTCTTTTTTGCAGCTTTTTGTTGTTGCCGGAACAT  
GTGGTATGGTTCAGCGACTACCCCATCGAATTATTTGGGCCTACTCGTTATCAATGGGATCAAGGGTACTTCCAACAAG  
AAATATATAGAAGAGTTAGTGCTGGGTTAGCCGAAAATCAAAGTTTATCAGAAGCTTGGTCTAAAATTCCTGAAAAATTA  
GCCTTTTATGATTACATCGGAAATAATCCGGCAAAGGGGGATTATTCAGGGCGGGCTCAATGGATAACGGGGATGGAAT  
AGCGGTTGGATGGTTAGGACATCCTATTTTTAGAGATAAAGAAGGGCGTGAACCTTTTTGTACGTCGTATGCCTACCTTTT  
TTGAAACATTTCCGGTCTTTTTGGTAGACGGAGATGGGATTGTTAGAGCCGATGTTCCTTTTCGAAGGGCAGAATCTAAG  
TATAGTGTCAACAAGTAGGTGTAACCTGTTGAGTCTACGGTGGTGAACCTCAATGGAGTCAGTTATAGTGATCCTGTTAC  
TGTGAAAAAATATGCTAGACGCGCTCAATTGGGGGAAATTTTTGAATTAGATCGTGTACTTTGAAATCCGATGGTGT  
TTGCTAGCAGTCCGAGGGGTTGGTTACTTTGGACATGCTTCATTTGCTTTGCTCTTCTTCTCGGACACATTTGGCAT  
GGTGCCCGAACCTTGTTTAGAGATGTTTTGCTGGTATTGACCCAGATTTGGATGCTCAAGTAGAATTTGGAGCATTCCA  
AAAA---CTTGGAGATCCAACCTACAAGAAGACAAATA---GGCTGA---  
ATGAAAACCTTATATTCCTGAGGAGGTTCTACCCCGTGGAAACGCTCTTTAATGGAACCTTTAGCTTTAGCTGGTCTGTA  
CCAAGAAACCACTGGTTTTGCTTGGTGGGCGGGGAATGCCCGGCTTATCAATTTATCTGGTAAACTACTAGGGGCTCATG  
TAGCCCATGCCGATTAATCGTATTTTGGGCGGAGCAATGAATCTATTTGAAGTGGCTCATTTTCGTACCAGAGAAGCCT  
ATGTATGAACAAGGATTAATTTTACTTCCCCACCTAGCTAC  
Liriodendron GTCGCTATTTCCCGATCA---  
AGGGGGGAGTACGTAGATGGAACAATTTCTTAGATGTATTACCGTATCCCCAAGGGTTGGGCCCACTTTTTACAGGTCA  
GTGGAATCTTTATGCCCAAACCCCGATTCCAGTAGTCATTTATTTGGTACCTCCAAGGAGCGGGAACCTGCCATTCTAA  
CCCTTCTCGGGGATTCCATCCACAACCGCAAAGTTTTATGGCTGACCGATATTGCTCATCATCATTTTAGCTATTGCATTT  
ATTTTTCTCGTTGCTGGTCATATGTATAGAATAACTTCGGGATTGGGCACAGTATGAAAGATCTTTTAGAAGCACATAC  
TCCTCCGGGGGGTTCGATTGGGACGTGGTCATAAGGGTCTTTATGACACAATCAATAATTCGATTCATTTTCAATTAGGTC  
TTGCTCTAGCCTCTTTAGGGGTTATTACTTCTTGGTAGCTCAACACATGTACTCTTTACCTGCTTATGCATTCATAGCA  
CAAGACTTTACTACTCAAGCTGCGTTATATACTCATACCAATACATCGCAGGATTCATCATGACAGGAGCCTTTGCTCA  
TGGAGCTATATTCTTCATTGAGATTACAATCCGGAACAGAATGAGGATAATGTATTGGCAAGAATGTTAGACCATAAAG  
AAGCTATCAAACTCATTTAAGTTGGGTCAGCCTGTTCTGGGGTTCCATACCTTAGGACTCTATGTTCAACACGACGTT  
ATGCTTGCTTTTTGGGACTCCGGAGAAACAAATCTTGATCGAACCTATATTTGCCAATGGATAACAATCCGCTCATGGTAA  
GACTTCATATGGGTTGATGTACTCTTATCTTCAACGAGTGGCCAGCATTCAATGCTGGTGAAGCATATGGTTACCCG  
GCTGGTTGAATGCTGTTAATGAGAATAGTAATTCATCTTAAACAATAGGTCCTGGAGATTTCTTGGTTCATCATGCT  
ATTGCTCTAGGTTGTCATACAACCTACATTGATCTTAGTAAAAGGTGCTTTAGATGCACGTGGTTCCAAGTTAATGCCAGA  
TAAAAGGATTTCCGGTTATAGTTTTCTTGGCAGCGTCTGGACGAGGCGGTACTTGTGATATTTCCGGCTTTGGGACGCAT  
TTTATTTGGCAGTTTTCTGGATGTTAAATACTATTGGATGGGTTACTTTTTATTGGCATTGGAAGCACATCACATTATGG  
CAGGGTAAACGTTTCAAAATTAATGAATCCTCCACTTATTTGATGGGATGGTTAAGAGATTATCTATGGTTAAACTCTTC  
ACAACCTATCAATGGATATAACCCTTTTGGTACGAATAGTTTATCAGTCTGGGCATGGATGTTCCATTTGGGCATCTTG  
TTTGGGCTACTGGATTTATGTTCTTAATTTCTTGGCGTGGATATTGGCAGGAATTGATTGAAACTTTAGCATGGGCTCAT  
GAACGCACGCTTTGGCTAATTTGATTTCGATGGAGGGATAAACCAGTGGCTCTTTCCATTGTGCAAGCAAGATTGGTTGG  
ATTAGCCCACTTTCTGTAGGTTATATATTCACTTATGCAGCTTTCTTGGATTGCCTCTACATCAGGCAAATTTGGTTAAA  
TGTCACATTCAGTAAAGATTTATGATACATGTATAGGGTGTACTCAATGTGTACGAGCCTGCCCCACAGATGTATTGGAA  
ATGATACCTTGGGACGGATGTAAAGCTAAGCAAATGCTCCTGCTCCAAGAACAGAGGACTGTGTAGGTTGTAAGAGATG  
TGAATCCGCTTGTCCAACGGATTTCTTGGAGTGTCCGGGTTTTATTTATGGCATGAGACAACCTCGCAGCATGGGTCTAGCTT  
AT---ATGACAGATTTCAAT---  
TTACCCTCTATTTTTGTGCCTTTAGTGGGCTTAGTATTTCCGGCAATTGCAATGGCTTCTTTATCCCTTCATGTTCAAAA  
AAACAAGATTGTT---ATGCGAGATATAAAAACATATCTCTCC---  
GTGGCACCTGTGCTAACTACTCTATGGTTTGGGTCTTTAGCAGGTCTATTGATAGAGATCAATCGTTTTATTCCAGATGC  
GTTGGTATTTCCCTTTTTTTTTCATT---  
ATGACTGCAATTTTAGAGAGACGCGAAAGCACAAGCCTATGGGGTTCGCTTCTGTAACCTGGATAACCAGCACTGAAAACCG

TCTTTATATTGGATGGTTCCGGTGTGTTTTGATGATCCCTACCTTATTGACCGCAACTTCTGTATTTATTATCGCCTTCATTG  
CTGCTCCTCCAGTGGATATTGATGGTATTCGTGAACCTGTTTTCTGGGTCTCTACTTTATGGAAACAATATTATCTCTGGT  
GCCATTATTCTACTTCTGCAGCTATAGGTTTTGCATTTTTACCCAATATGGGAAGCAGCATCCGTTGATGAATGGTTATA  
CAATGGTGGTCCTTATGAGCTAATTGTTCTACACTTCTTACTTGGTGTAGCTTGTACATGGGTTCGTGAGTGGGAACCTTA  
GTTTCCGCTCTGGGTATGCGCCCTGGATTGCTGTTGCATATTCAGCTCCTGTTGCAGCTGCTACTGCTGTTTTCTTGATT  
TACCCTATTGGTCAAGGAAGCTTCTCTGATGGTATGCCTCTAGGAATCTCTGGTACTTTCAACTTCATGATTGTATTCCA  
GGCTGAGCACAACATCCTTATGCATCCATTTTCATATGTTAGGCGTAGCTGGTGTATTTCGGCGGCTCCCTATTAGTGCTA  
TGCATGGTTCCTTGGTAACCTCTAGTTTGATCAGGGAAACCCTGAAAACGAGTCTGCTAATGAAGGTTACAGATTCCGT  
CAAGAGGAAGAACTTATAATATCGTAGCTGCTCATGGTTATTTTTGGCCGATTGATCTTCCAATATGCTAGTTTCAACAA  
TTCTCGTTCCTTACATTTCTTCTAGCTGCTTGGCCTGTAGTAGGTATCTGGTTCACTGCTTTAGGTATCAGCACCATGG  
CTTTCAACCTAAATGGTTTTCAATTTCAACCAATCCGTAGTTGACAGTCAAGGTCGTGTTATTAACACTTGGGCTGATATC  
ATCAATCGTGCTAACCTTGGTATGGAAGTTATGCATGAACGTAATGCTCACAACTTCCCTCTAGACCTA---

GCTGCTGTTGAAGCTCCATCTACAAATGGA---  
ATGGGTTTACCTTGGTATCGTGTTCATACCGTTCGATTGAATGATCCCGGTTCGGTTGCTTTCTGTCCATATAATGCATAC  
AGCTCTAGTTTCTGGTGGGCCGGTTCGATGGCTTTATACGAATTAGCAGTTTTTGTATCCCTCTGACCCCGTTCTTGATC  
CAATGTGGAGACAAGGTATGTTTCGTTATCCCTTTCATGACTCGTTTAGGAATAAACAATTCATGGGGTGGTTGGAGTATC  
ACAGGAGGAACATAACGAATCCGGGTATTTGGAGTTACGAGGGTGTGGCCGGGGCACATATTGTGTTTTCTGGCTTGTTG  
CTTCTTAGCAGCTATCTGGCATTGGGTGTATTGGGACCTAGAAATATTCTGTGATGAACGTACGGGAAAACCCTCTTTGG  
ATTTGCCAAGATCTTTGGAATTCATTTATTTCTCTCAGGGGTGGCTTGGCTTTGGGTTTGGCGCATTTTCATGTAACAGGC  
TTGTATGGTCCCTGGAATATGGGTGTCCGATCCTTATGGCCTAACTGGAAAAGTACAATCTGTAAATCCAGCGTGGGGCGC  
GGAAGGTTTTGATCCCTTTGTTCCGGGAGGAATAGCCTCTCATCATATTGCAGCGGGGACATTGGGCATATTAGCGGGTC  
TATTCCATCTTAGTGTCCGCCCCGCCAACGTCTATACAAAGGATTACGTATGGGCAATATTGAAACTGTCCTTTCCAGT  
AGTATCGCTGCTGTCTTTTTTGCAGCTTTCGTTGTTGCTGGAACCTATGTGGTATGGTTTCAGCAACTACCCCGATCGAATT  
ATTTGGTCCCCTCGTTATCAGTGGGATCAGGGATACTTTCAGCAAGAAATATATCGAAGGGTTGGTGCCGGGCTAGCCG  
AAAATCTTAGTTTGTTCGGAAGCTTGGTCTAAAATTTCCCGAAAATTAGCTTTTTATGATTACATCGGTAATAATCCGGCG  
AAAGGGGGATTATTAGAGCAGGCTCAATGGATAACGGGGATGGAATAGCTGTTGGATGGTTAGGACACCCCATTTTTAG  
AGATAAAGAAGGGCATGAGCTTTTTGTACGTCTGATGCCTACTTTTTTGAACATTTCCAGTAGTTTTGGTAGACGGAG  
ACGGAATTTGTGAGAGCCGATGTTCTTTTAGAAGGGCAGAATCAAAGTATAGTGTGCGAACAGGTAGGTGTAACATGTTGAG  
TTCTACGGTGGCGAACTCAATGGAGTCAGTTATAGTGTACTGCTACTGTGAAAAAATATGCTAGACGTGCCCAATTTGGG  
TGAAATTTTTGAATTAGATCGTGCTACTTTGAAATCCGATGGTGTTTTTTTCGTAGCAGTCCAAGGGGTTGGTTCACTTTTG  
GACATGCTACGTTTGGCTTTGCTCTTCTTTTTTTCGGACACATTTGGCATGGCGCTAGAACCCTTGTTCAGAGATGTTTTGCT  
GGTATTGACCCAGATTTGGATGCTCAAGTGAATTTGGGGCATTCCAAAA---  
CTTGGAGATCCAACTACAAGGAGACAA-----

ATGAAAACCTTATATTCCCTGAGGAGGTTCTACCCCGTGGAAACGCTCTTTAATGGAACCTTTATCTTTAGCTGGTTCGTGA  
CCAAGAAACCACCGGGTTCGCTTGGTGGGCTGGGAATGCCCGACTTATCAATTTGTCCGGTAAACTACTCGGCGCTCACG  
TAGCCCATGCCGATTAATCGTATTCTGGGCCGGAGCAATGAACCTATTTGAAGTGGCTCATTTCGTACCAGAGAAACCC  
ATGTATGAACAAGGATTAATTTTACTTCCCCATCTAGCTAC

Lotus                   GTCGCTATTCCGGGATCT---

AGGGGAGAATACGTTTCGATGGAATAATTTTTTAAGTATATTGCCTCACCCCAAGGATTAGGTCCACTTTTTACAGGTCA  
GTGGAATCTTTATGCTCAAAACCCCGATTCCAGTAGTCATTTATTTGGTACCTCCAAGGGGCTGGAAGTCTATTTTTAA  
CACTTCTCGGGGATTCCATCCACAAACGCAAAGTTTTATGGCTAACCGATATGGCACACCATCATTTAGCTATTGCCATT  
CTGTTTCTACTTGGCCGTCATATGTATAGAATAACTTCCGGTATTGGGCACAGTATAAAGGATCTTTTAGAAGCACATAT  
TCCTCCCGGGGGTAGATTAGGGCGTGGACATAAGGGTCTTTATGACACAATCAATAATTCAATTCATTTCAATTAGGCC  
TTGCCTTAGCCTCTTTAGGGGTGATTACTTCTTTGGTAGCTCAACACATGTATTCTTTACCCGCTTATGCGTTTATAGCG  
CAAGACTATACTACTCAAGCTGCGTTATATACTCATCATCAATACATCGCAGGATTCATTATGACAGGGGCTTTTGCTCA  
CGGAGCTATCTTTTTTATTCGAGATTACAATCCTGAGCAGAATGAAGATAATGTATTGGCAAGAATGTTAGATCACAAGG  
AAGCTATCATATCCCAATTTAAGTTGGGCCAGTCTATTTCTGGGTTCCATACTTTGGGACTTTATGTCCATAATGATGTT  
ATGCTTGCTTTTTGGTACTCCGGAGAAACAAATCTTGATTGAACCCATATTTGCCAATGGATAACAATCTGCTCATGGGAA  
AACTTCATATGGGTTTCGATGACTTTTTATCTTCAACGAATAGTCCGGCGTTCAATGCGGGGCGAAGCATATGGTTGCCTG  
GTTGGTTAAACGCTATTAATGAGAATAGTAATCTCTATTCTTAAACAATAGGACCCGGCGACTTCTTGGTTCATCATGCT  
ATTGCTCTTGGTTTACATACAACTACATTGATCTTAGTAAAAGGTGCTTTGGATGCGCGTGGTTCCAAATTAATGCCGGA  
TAAAAAGATTTTTGGTTATAGTTTTCTTGCATGGTCCGGGACGGGGCGGTACTTGTGATATTTCCGGCCTGGGACGCTT  
TTTTTTGGCAGTTTTCTGGATGTTAAATACGATTGGATGGGTTACTTTTTTATTGGCATTGGAAGCACATTACACTGTGG  
CAGGGTAAATGTTTTCACAGTTTTAATGAATCTTCGACCTATTTAATGGGATGGTTAAGAGATTATCTATGGTTAAACTCTTC  
ACAACCTATCAATGGATATAACCCTTTTTGGTATGAATAGTTTATCAGTCTGGGCGTGGATGTTTTTTATTTGGACATCTTG  
TTTTGGGCTACTGGATTTATGTTCTTAATTTTCTGGCGGGATATTGGCAGGAATTAATTGAAACTTTAGCATGGGCTCAT  
GAACGCACACCTTTGGCTAATTTGATTTCGATGGAGAGATAAGCCAGTTGCTCTTTCCATTGTGCAAGCAAGGTTGGTTGG

ATTAGCCCACTTTTCGGTAGGTTATATATTTACTTATGCGGCTTTCTTGATTGCCTCTACATCGGGTAAATTTGGT---  
ATGTCACATTTCAGTAAAAATTTATGATACATGTATAGGATGTACTCAATGTGTCCGAGCCTGTCTACAGATGTATTAGA  
AATGATACCTTTGGGACGGATGTAAAGCTAAGCAAATAGCTTCTGCCCAAGAACAGAAGACTGTGTTGGTTGTAAAAGGT  
GCGAATCCGCTTGTCCGACGGATTTCTTAAGTGTAGAGTTATTTATGGCATGAAACAACCTCGAAGTATGGGTCTAGCT  
TAT-----  
TTACCTTCTATTTTTGTGCCTTTAGTGGGCCTAGTATTTCCGGCAATGGCAATGGCTTCTTTATTTCTTTATCTTCAAAA  
AAACAAGATTTTT---ATGCGAGATCTAAAAACATATCTCTCC---  
GTGGCACCAGTGGTAAGTACTCTATGGTTCGCGGCTTTAGCAGGTCTCTTGATAGAGATCAATCGTTTATTCCCGGATGC  
ACTAATATTTCCCTTTTTTTTTCATTC---  
ATGATGCAATTTTAGAGAGACGCGAGAGCGAAAACCTATGGGGTCGCTTCTGTAACCTGGATAACTAGCACTGAAAACCG  
TCTTTACATTTGGATGGTTTTGGTGTTTTGTATGATCCCTACCTTATTGACCACAACCTTCTGTATTTATTATCGCTTTTCATTG  
TCGCCCTCCGGTAGATATTGATGGTATTCGTGAACCTGTTTCTGGATCTCTACTTTACGGAACAATATCATTCTGGT  
GCCATTATTCCTACTTCTGCGGCTATCGGTTTGCACCTTTTACCCGATCTGGGAAGCAGCATCTGTTGATGAATGGTTATA  
CAATGGCGGTCCTTATGAACTAATTGTTCTACATTTCTTACTTGGTGTAGCTTGTACATGGGTGCTGAGTGGGAACCTTA  
GTTTTCGTCTAGGTATGCGCCCTTGGATTGCTGTTGCATATTCAGCTCCTGTTGCAGCCGCTACTGCTGTTTTCTTGATC  
TATCCGATTGGTCAAGGAAGCTTTTCTGACGGTATGCCTCTAGGAATCTCTGGTACTTTCAACTTTATGATAGTATTTCA  
GGCTGAGCATAACATCCTTATGCATCCATTTACATGTTAGGTGTAGCTGGTGTATTTCGGCGGCTCCCTATTTAGTGCTA  
TGCACGGTTCCTTGGTAACTTCTAGTTTGTATCAGGGAAACCACAGAAAATGAATCTGCTAATGAAGGTTACAGATTCGGT  
CAAGAGGAAGAAAACCTATAATATTGTAGCTGCTCACGGTATTTTTGGCCGATTGATCTTCCAATATGCAAGTTTCAACAA  
CTCTCGTTCTTTACACTTCTTCTTAGCTGCTTGGCCTGTTGTAGGTATCTGGTTTACTGCGTTAGGTATCAGCACTATGG  
CTTTCAATTTGAATGGTTTTCAATTTCAACCAATCTGTAGTTGATAGTCAAGGTCGTGTAATTAACACCTGGGCTGATATT  
ATTAACCGAGCTAACCTTGGTATGGAAGTTATGCATGAACGTAATGCTCATAACTTCCCTCTAGACCTA---  
GCTGCGGTCGAGGCTCCATCTATAAATGGA---  
ATGGGTTTGCCTTGGTATCGTGTTCATACCGTTGTATTAATGATCCCGGCCGTTTGCTTGCTGTCCATATAATGCATAC  
AGCTCTGGTTGCTGGTTGGGCTGGTTCAATGGCTCTATATGAATTAGCAGTTTTTGTATCCTTCTGATCCCGTTCTTGACC  
CAATGTGGAGACAGGGTATGTTTCGTTATACCCTTCATGACTCGTTTAGGAATAACCAATTCGTGGGGCGGTTGGAATATT  
ACAGGGGGAACTATAACGAATCCAGGTATTTGGAGTTATGAAGGTGTGGCCGGGGCGCATATTGTGTTTTCCGGCTTGTG  
CTTTTTGGCCGCTATCTGGCATTGGGTCTATTGGGATTTAGAAAATCTTTCTGATGAACGTAACCTGGAAAACCTTCTTTAG  
ATTTGCCAAAAATCTTTGGAATTCATTTATTTCTTTCAGGGTTGGCTTGTTTTTGGGTTTGGCGCATTTCAATGTAATGGA  
TTGTATGGTCTTGAATATGGGTGTCGATCCTTATGGACTAACCGGAAGGGTACAACCCGTAATCCCGCATGGGGTGT  
GGAAGGTTTTGATCCCTTTGTTCCGGGAGGCGTAGCCTCTCATCATATTGCAGCAGGGACATTGGGTATATTAGCGGGCC  
TTTTCCATCTTAGTGTGCGCCACCCCAACGCTCTATATAAAGGATTACGTATGGGAAATATTGAAACCGTCTTTCCAGT  
AGTATCGCTGCTGTCTTTTTTGCAGCTTTTGTGTTGCTGGAACCTATGTGGTATGGTTCAGCAACTACCCCGATTGAATT  
ATTTGGTCCCCTCGTTATCAATGGGATCAGGGATACTTCCAGCAAGAAATATATCGAAGAGTTGGTGTGGGCTAGCTG  
AAAATCAAAGTTTCTCAGAAGCTTGGTCTAAAATTTCCCGAAAAATTTGGCTTTTTATGATTACATCGGCAATAATCCGGCA  
AAAGGAGGTTTTGTTTAGAGCGGGTTCAATGGACAATGGAGATGGAATAGCCGTCGGTTGGTTAGGACATCCTATCTTTAG  
GGATAAAGAGGGGCGTGAACCTTTTTGTACGTCGTATGCCTACCTTTTTTGAACATTTCCGGTTGTTTTGGTAGACGGAG  
ACGGAATTTGTTAGAGCCGATGTTCTTTTTCGAAGGGCAGAATCGAAATATAGTGTGCAACAAGTAGGCGTAACTGTTGAA  
TTCTATGGTGGCGAACTCAATGGAGTCAGTTATAGTATCCCGCTACTGTCAAAAAATATGCCAGACGTGCTCAATTGGG  
TGAAATTTTTGAATTAGATCGTGCTACTTTGAAATCTGATGGTGTTTTTCGTAGCAGTCCGAGGGGTTGGTTTTACTTTTG  
GACATGCTTCGTTTGTCTGCTGTTCTTTTTCGGGCACATTTGGCATGGTCTAGAACCTTGTTTAGAGATGTTTTTGC  
GGTATCGACCCAGATTTAGATTCTCAAGTCGAATTTGGAGCATTCCAAAAA---  
CTTGGAGATCCAACCACAAGAAGACAGGTA---GTC-----  
ATGAAAACCTTATATTTCCCTGAGGAGGTTCTACCACGTGGAAACGCTCTTTAATGGAACCTTTAGCTTTAACCGGTCGTGA  
CCAAGAAACTACCGGTTTTGCTTGGTGGGCGGGGAATGCCCGACTTATCAATTTATCTGGTAAACTTCTGGGGGCCCATG  
TAGCCCATGCTGGATTAATAGTATTCTGGGCCGGAGCAATGAACCTATTTGAAGTGGCTCATTTTGTACCCGAGAAGCCC  
ATGTATGAACAAGGCTTAATTTTACTTCCCCATCTAGCTAC  
Morus                   GTTGCTATTCTGGATCC---  
AGGGGAGAATACGTTTCGATGGAATAATTTCTTAGACGTATTGCCGCATCCCCAAGGATTAGGTCCACTTTTTACGGGTCA  
GTGGAATCTTTATGCTCAAAACCCTGATTCAAGTAGTCATTTATTTGGTAACTCCAAGGAGCAGGAAGTCCATTCTAA  
CCCTTCTCGGGGATTCCATCCACAAACGCAAAGTTTTATGGCTGACCGATATTGCTCATCATCATTTAGCTATTGCATTT  
ATTTTTCTTATTGCTGGTCATATGTATAGAATAATTTCCGGATTGGGCACAGTATCAAAAATCTTTTAGAAGCACATAT  
TCCGCCGGGGGACGATTGGGGCGTGGGCATAAAGGCTTTTATGACACAATCAATAATTCGATTCAATTTCAATTAGGTC  
TTGCTCTAGCCTCTTTAGGGGTTATTACTTCTTGGTTCGCTCAACACATGTATTCTTTACCCGCTTATGCATTTCATAGCA  
CAAGACTTTACTACTCAAGCTGCTTTATATACTCATACCAATACATTGCAGGATTCATCATGACAGGAGCTTTTGTCTCA  
TGGAGCTATATTTTTTATTAGAGATTACAATCCGGAACAGAACGAGGATAATGTATTGGCAAGAATGTTAGACCATAAAG  
AAGCTATCATATCCCATTTAAGTTGGGCTAGCCTCTTTCTAGGGTTCCATACTTTGGGACTTTATGTTTCATAATGATGTC

ATGCTTGCTTTTGGTACTCCGGAAAAACAAATCTTGATCGAACCTATATTTGCCCAATGGATAACAATCTGCCCATGGTAA  
AACTTCATATGGGTTTCGATGTACTTTTATCTTCAACGAATGGTCCGGCATTCAATGCCGGTTCGAAGCATATGGTTGCCCG  
GTTGGTTAAATGCTATTAATGAAAATAGTAATTCACTATTCTTAACAATAGGACCTGGAGACTTTTTGGTTTCATCATGCT  
ATTGCTCTAGGTTTACATACAACCTACATTGATCTTAGTAAAGGGGGCTTTAGATGCACGTGGCTCCAAGTTAATGCCAGA  
TAAAAAGGATTTTGGTTATAGTTTTCTTTGTGATGGTCCGGGACGAGGCGGTACTTTGTGATATTTCCGGCTTGGGACGCAT  
TTTATTTGGCGGTTTTTGGATGTTAAATACCATTGGATGGGTGACTTTTTATTGGCATTGGAAGCACATCACATTGTGG  
CAGGGTAAACGTTTCACAGTTTAATGAGTCTTCAACTTATTTGATGGGATGGTTAAGAGATTATCTATGGTTAAACTCTTC  
ACAACCTATTAACGGATATAACCCCTTCGGTATGAATAGTTTATCAGTCTGGGCGTGGATGTTCTTATTTGGACATCTTG  
TTTGGGCTACTGGATTTATGTTCTTAATTTCCCTGGCGTGGATATTGGCAGGAATTGATTGAAACTTTAGCATGGGCTCAT  
GAACGAACACCTTTGGCTAATTTGATTTCGATGGAGAGATAAACCCGGTGGCTCTTTCCATTGTTCAAGCAAGATTGGTTGG  
GTTAGCCCACCTTTCTGTGCGTTATATATTTCACTTATGCGGCTTTCTTGGATTGCTTCTACATCAGGAAAATTTGGTTAAA  
TGTACATTCAGTAAAGATTTATGATACGTGTATAGGGTGTACTCAATGTGTCCGAGCTTGCCCCACAGATGTATTAGAA  
ATGATACCTTGGGATGGGTGTAAAGCTAAACAAATTTGCTTCTGCTCCAAGAACAGAGGACTGTGTGGGTTGTAAAAGATG  
TGAATCTGCCTGTCCAACGGATTTCTTGAGTGTTTCGAGTTTATTTGTGGCATGAAACAACCTCGAAGTATGGGTCTAGCTT  
ATTGAATGACAACCTATCAGTAACTTACCCGCTATTTTTGTGCCTTTAGTGGGCTTAGTATTTCCGGCAATTGCAATGGTT  
TCTTTATCTCTTCATGTTCAAAAAACAAGATTTTTTAGATGCGAAATCTAAAAACATACCTTTCC---  
GTGGCACCGGTAGTAAGTACTCTATGGTTTGGGTCTTTAGCGGGTTTTATTGATAGAGATCAATCGTTTTATTTCCGGATGC  
GTTGATATTTCCCTTTTTTTTTTTCATTATAGATGACTGCAATTTTAGAGAGACGCGAAAGCGAAAGCCTATGGGGTCGCTTTT  
GTAACCTGGATAACCAGCACTGAAAACCGTCTTTACATTGGATGGTTTGGTGTTTTGTGATCCCTACCTTATTGACCGCA  
ACTTCTGTATTTATTATCGCTTTTTCATTGCTGCCCTCCGGTAGATATTGATGGTATTCGTGAACCTGTTTCTGGATCTCT  
ACTTTATGGAACAATATTTATTTCTGGTGCCATTATTCTACTTCTGCAGCTATAGGTTTGCACCTTTACCCAATCTGGG  
AAGCGGCTTCTGTTGATGAATGGTTATACAATGGTGGTCTTATGAGTTAATTGTTCTACACTTCTTACTTGGTGTAGCT  
TGTTATATGGGTCGTGAGTGGGAACCTTAGTTTTCCGCTCTGGGTATGCGCCCTTGGATTGCTGTTGCATATTCAGCTCCTGT  
TGCAGCTGCTACTGCTGTTTTCTTGATCTATCCAATTGGTCAAGGAAGCTTTTTCTGACGGTATGCCTCTAGGAATCTCTG  
GTACTTTCAACTTCATGATTGTATTCCAAGCTGAGCACAACATCCTTATGCACCCATTTACATGTTAGGTGTAGCTGGT  
GTATTCGGCGGCTCCCTATTCAGTGTCTATGCATGGTTCCTTGGTAACCTCTAGTTTGTATCAGGGAAACCACAGAAAATGA  
ATCTGCTAATGCAGGTTACAGATTCGGTCAAGAGGAAGAAAACCTATAATATTGTAGCCGCTCATGGTTATTTTGGCCGAT  
TGATCTTCCAATATGCAAGTTTCAACAATTTCTCGTTCTTTACACTTCTTCTTAGCTGCTTGGCCTGTAGTAGGTATTTGG  
TTTACCCTTTTAGCATTAGCACTATGGCTTTCAACTTAAATGGTTTTAATTTCAACCAATCTGTAGTTGATAGTCAAGG  
TCGTGTAATTAATACTTGGGCTGATATCATTAAACCGTGTCTAATCTTGGTATGGAAGTTATGCACGAGCGTAATGCTCATA  
ACTTCCCTCTAGACCTA---  
GCTGGTGTAGAAGTTCATCTACAAATGGATAAATGGGTTTTGCCTTGGTATCGTGTTTCATACGGTTCGTATTGAACGATCC  
CGGTGCTTTGATTTCTGTCCATATAATGCATACAGCTCTGGTTGCTGGTTGGGCCGGTTCGATGGCTCTATATGAATTAG  
CTGTTTTTGTATCCCTCTGACCCTGTTCTTGATCCAATGTGGAGACAGGGTATGTTTCGTTATACCCTTCATGACTCGTTTA  
GGAATAACCAATTCATGGGGGGGTTGGAGTATTACCGGGGGGACTATAACGAATCCGGGTATTTGGAGTTACGAAGGTGT  
GGCTGGTGCACATATTGTGTTTTCTGGCTTGTGCTTTTTGGCAGCTATCTGGCATTGGGTGTATTGGGATCTAGAAATAT  
TTTGTGATGAACGTACAGGCAAACCCCTCTTTGGATTTGCCCAAGATCTTTGGAATTCATTTATTTCTCTCAGGAGTGGCG  
TGCTTTGGTTTTTGGCGCATTTCATGTAACAGGATTGTATGGTCTTGGAAATATGGGTATCCGATCCTTATGGACTAACGGG  
AAGGGTACAAGCTGTAAATCCAGCATGGGGTGTGGAAGGTTTTGATCCTTTTGTCCGGGAGGAATAGCCTCTCATCATA  
TTGCAGCAGGAACCTTGGGCATATTGGCGGGTCTATTCCATCTTAGTGTCCGTCGCCCCCAACGTCTATACAAAGGATTA  
CGTATGGGAAATATTGAAACCGTCTTTCCAGTAGTATCGCTGCGGTCTTTTTTGCAGCTTTTGTAGTTGCTGGAACCTAT  
GTGGTATGGCTCGGCAACTACCCCATTTGAATTATTTGGTCCCACCCGTTATCAATGGGATCAAGGATACTTCCAACAAG  
AAATATATCGAAGAGTTAGTGTGGGCTAGCCGAAAATAAAAGTTTATCTGAAGCTTGGTCTAAAATTCCTGAAAAATTA  
GCCTTTTATGATTACATTGGCAATAATCCGGCAAAAGGGGGATTATTTAGAGCGGGCTCAATGGACAACGGGGATGGAAT  
AGCTGTTGGTTGGTTAGGACACCCGATCTTTAGAGATAAAGAAGGGCGTGAACCTTATGTACGTGCTATGCCTACTTTTT  
TTGAAACATTTCCGGTTGTTTTGGTAGACGGAGACGGAATTTGTTAGACCCGATGTCCCTTTTAGAAGGGCAGAATCGAAA  
TATAGTGTGCAACAAGTAGGTGTAACCTGTTGAGTTCTATGGCGGTGAACCTCAATGGAGTCAGTTATAGTGTATCCAGCTAC  
TGTGAAAAAATATGCTAGACGTGCTCAATTGGGTGAAATTTTTGAATTAGATCGTGCAGCTTTGAAATCCGATGGTGT  
TTTCGTAGCAGTCCGAGGGGTTGGTTTTACTTTTTGGACATGCTTTCGTTTGTCTGCTCTTCTTCTTTGGACACATTTGGCAT  
GGTGTAGAACCCTGTTTCAGGGATGTTTTTGGTGGTATTGACCCGGATTGGATGCTCAAGTGGAAATTTGGAGCATTCCA  
AAAA---CTTGGAGATCCAACCTACAAGAAGACAAGTA---GTCTGA---  
ATGAAAACCTTATATTTCCCTGAGGAGGTTCTACCCCGTGGAAACGCTCTTTAATGGAACCTTTAGCTTTAGCTGGTCTGTGA  
CCAAGAAACCACTGGTTTTCGCTTGGTGGGCCGGGAATGCCCGACTTATCAATTTATCCGGTAAACTGCTGGGGGCTCATG  
TAGCACATGCCGATTAATCGTATTCTGGGCCGGAGCAATGAACCTTATTTGAAGTGGCTCATTTCGTACCAGAGAAGCCT  
ATGTATGAACAAGGATTAATTTTTACTTCCCCACCTAGCTAC  
Nandina GTTGCTATTCCCGATCC---  
AGGGGGGAGTACGTTTCGATGGAATAATTTCTTAGATGTATTACCGCATCCCCAAGGGTTAGGCCACTTTTTTACAGGTCA

GTGGAATCTTTATGCCCAAACCCCGATTCCGGTAGTCATTTATTTGGTACCTCGCAAGGAGCGGGAACCTGCCATCCTAA  
CCCTTCTTGGGGGATTTTCATCCACAAACGCAAAGTTTTATGGCTAACCGATATGGCTCATCATCATTTAGCCATTGCATTT  
ATTTTTCTTGGTGGTGCATATGTATAGAATAATTTCCGGGATTGGGCACAGTATGAAAGATCTTTTAGAAGCGCATAT  
TCCTCCCGGAGGTCGATTGGGGCGTGGACATAAGGGTCTTTATGATACAATCAATAATTCGATTCATTTTCAATTAGGCC  
TTGCTCTAGCCTCTTTAGGGGTTATTACTTCTTTAGTAGCTCAACACATGTACTCGTTACCTGCTTATGCATTCATAGCG  
CAAGACTTTACTACCCAAGCTGCGTTATATACTCATACCAATACATTGCAGGATTCATCATGACAGGAGCCTTTGCTCA  
TGGAGCTATATTCTTCATTAGAGATTACAATCCGGAACAGAATGAGGATAATGTATTGGCAAGAATGTTAGACCATAAAG  
AAGCTATCATATCCCATTTAAGTTGGGCCAGCCTATTTCTGGGGTTCCATACCTTGGGACTTTATGTTTATAACGACGTC  
ATGCTCGCTTTTGGTACTCCGGAGAAACAAATCTTGATCGAACCTATATTTGCCCAATGGATAACAATCTGCTCATGGTAA  
GACTTCTATGGGTTTCGATGTACTTTTATCTTCAACGAACGGCCCGGCATTTAATGCGGGTTCGAAGCATATGGTTGCCTG  
GCTGGTTAAATGCGGTTAATGAGAATAGTAATTCACTATTTCTTAACAATAGGCCCGGGAGACTTTTGGTTTATCATGCT  
ATTGCTCTAGGTTTACATAACAACACTACATTGATCTTAGTAAAAGGCGCTTTAGATGCACGTGGTTCCAAGTTAATGCCAGA  
TAAAAAGGATTTCCGGTTATAGTTTTCTTGTGACGGTCCGGGACGAGGTGGTACTTGTGATATTTCCGGCTTGGGATGCAT  
TTTTTTGGCAGTTTTCTGGATGTTAAATACCATTGGATGGGTTACTTTTTATTGGCATTGGAAGCACATCACATTATGG  
CAGGGTAAACGTTTTACAGTTTTAATGAATCCTCCACTTATTTGATGGGATGGTTAAGAGATTACCTATGGTTAAACTCTTC  
ACAACCTATCAATGGATATAACCCTTTTGGTATGAATAGTTTATCGGTATGGGCGTGGATGTTTTTATTGGACATCTTG  
TTTGGGCTACTGGATTTATGTTCTTAATTTTCTGGCGTGGATATTGGCAGGAATTAATTGAAACTTTAGCATGGGCTCAT  
GAACGCACACCTTTGGCTAATTTGATTTCGATGGAGAGATAAACCGGTGGCTCTGTCCATTGTGCAAGCAAGATTGGTTGG  
ATTAGCCACTTTTCTGTAGGTTATATATTTACTTATGCAGCTTTCTTGATTGCCTCTACATCCGGCAAATTTGGT---  
ATGTCACATTACAGTAAAGATTTATGATACATGTATAGGGTGTACTCAATGTGTACGAGCCTGCCCCACAGATGTATTAGA  
AATGATACCTTTGGGACGGATGTAAGCTAAGCAAATTTGCTTCTGCTCCAAGAACAGAGGACTGTGTAGGTTGTAAGGTT  
GTGAATCAGCCTGTCCAACAGATTTTTTGGAGTGTACGGGTTATTTATGGCATGAGACAACCTCGCAGCATGGGTCTAGCT  
TAT---ATGACAAATTTCAAC---  
TTCCCCTCCATTTTTGTGCCTTTAGTGGGCCTAGTATTTCCGGCAATTGCAATGGCTTCTTTATCTATTTCATGTTCAAAA  
AAACAAGATTGTC---ATGCGAGATCTAAAAACATATCTCTCT---  
GTGGCACCTGTGCTAAGTACTCTATGGTTCCGGTCTTTAGCAGGCTTATTGATAGAGATCAATCGTTTTATTCCCGGATGC  
GTTGACATTTCCCTTTTTTTTTCATTC---  
ATGACTGCAATTTTAGAGAGACGCGAAAGCCTGTGGGGTCTGTTTCTGTAATTGGATAACCAGCACTGAAAACCG  
TCTTTACATTTGGATGGTTCCGGTGTTTTGGATGATCCCTACTTTTATTGACTGCAACTTCTGTATTTTATTATCGCCTTCATCG  
CTGCTCCTCCAGTAGATATTGATGGTATTCGTGAACCTGTTTCTGGGTCTCTACTTTATGGAACAATATTATTTCTGGT  
GCCATTATTCTACTTCTGCAGCTATAGGTTTGCACTTTTACCCGATATGGGAAGCAGCATCCGTTGATGAATGGTTATA  
CAATGGTGGTCTTTATGAACATAATTGTTCTACACTTCTTACTTGGTGTAGCTTGTACATGGGTGCTGAGTGGGAACCTTA  
GTTTCCGTCTAGGTATGCGCCCTTGGATTGCTGTTGCATATTCAGCTCCTGTTGCAGCTGCTGCTGCGGTTTTCTTGATC  
TACCCAATTGGTCAAGGAAGCTTCTCTGATGGTATGCCTCTAGGAATTTCTGGTACTTTCAACTTCATGATTGTATTCCA  
GGCTGAACACAACATCCTTATGCACCCATTTACATGTTAGGCGTAGCTGGTGTATTTCGGCGGCTCCCTATTAGTGCTA  
TGCATGGTTCCCTTGGTAACCTCTAGTTTGTATCAGGGAAACCACTGAAAATGAATCTGCTAATGCAGGTTACAGATTCCGT  
CAAGAGGAAGAACTTATAATATCGTAGCTGCTCATGGTTATTTTGGCCGATTGATCTTCCAATATGCTAGTTTCAACAA  
TTCTCGTTCTTTACACTTTTTCTTAGCTGCTTGGCCTGTAGTAGGTATTTGGTTCACTGCTTTAGGTATCAGCACCATGG  
CTTTCAACCTAAATGGTTTTCAATTTCAACCAATCTGTAGTTGATAGTCAAGGTCGTGTAATTAACACTTGGGCTGATATC  
ATCAACCGCGCTAACCTTGGTATGGAAGTTATGCATGAACGTAATGCTCACAACTTCCCTCTAGATCTA---  
GCTGCTGTTGAAGCTCCATCTACAAATGGC---  
ATGGGTTTGCCTTGGTATCGTGTTCATACCGTTCGATTTGAATGATCCCGGCCGGTTGCTTGCTGTCCATATAATGCATAC  
AGCTCTAGTTTCTGGGTGGGCTGGTTCAATGGCTCTATACGAATTAGCAGTTTTTGTATCCCTCTGACCCCGTTCTTGATC  
CAATGTGGAGACAAGGTATGTTTCGTTATACCCTTCATGACTCGTTTAGGAATAACCAATTCATGGGGTGGTTGGAGTATC  
ACAGGAGGAACGTAAACAAATCCGGGTATTTGGAGTTACGAAGGCGTAGCCGGGACATATTGTGTTTTCTGGCTTGTG  
CTTCTTGGCAGCTATCTGGCATTGGGTGTATTGGGATCTAGAAAATTTCCGTGATGAACGTACAGGAAAACCTTCTTTGG  
ATTTGCCCAAGATTTTTGGAATTTCAATTTCTCTCAGGGTTAGCTTTGCTTTGGGTTTGGTGCATTTTCATGTAACAGGC  
TTGTATGGTCCGGGAATATGGGTGTCCGATCCTTATGGACTAATGGAAAAGTACAATCTGTAAGTCTGCGTGGGGCGT  
AGAAGGTTTTGATCCTTTTTGTTCCAGGAGGCATAGCTTCTCATCATATTGCAGCAGGGACATTGGGCATATTAGCGGGCC  
TATTTCTATCTTAGTGTCCGTCCGCCCCAACGCCTATACAAAGGATTACGTATGGGTAATATTGAAACTGTCTTTCCAGC  
AGTATCGCTGCTGTCTTTTTTGCAGCTTTTGTGTTGCTGGAACCTATGTGGTATGGTTCAGCAACTACCCCCATCGAATT  
ATTTGGTCCCCTCGTTATCAATGGGATCAGGGATACTTCCAGCAAGAAATATATCGAAGGGTTGGTGCCGGACTAGCAG  
AAAATCAGAGTTTAGCAGAAGCTTGGTCTAAAATTTCCCGAAAATTTAGCTTTTTTATGATTACATCGGCAATAATCCAGCA  
AAAGGGGGATTATTAGAGCGGGCTCAATGGACAACGGGGATGGAATAGCCGTTGGGTGGTTGGGACATCCTATCTTTAG  
AGATAAAGAGGGGCGCGAGCTTTTTGTACGTCGTATGCCTACTTTTTTTGAAACATTTCCAGTAGTTTTGGTAGATGGAG  
ACGGAATTGTGAGAGCTGATGTTCTTTTAGAAGGGCAGAATCCAAGTATAGTGTGAGCAAGTGGGGGTAACCTGTTGAG  
TTCTATGGTGGCGAACTTAATGGCGTCAGTTATAGTGATCCTGCAACTGTGAAAAAATATGCTAGACGTGCTCAATTAGG

TGAAATTTTTGAATTAGATCGTGCTACTTTGAAATCTGATGGTGTTTTTTCGTAGCAGTCCAAGAGGTTGGTTCACTTTTG  
GGCATGCTTCGTTTGCTTTGCTCTTCTTTTTTCGGACACATTTGGCATGGTGTAGAACCTTGTTTCAGAGATGTTTTTGT  
GGTATTGATCCAGATTTGGATGCTCAAGTGAATTTGGAGCATTCCAAAA---  
CTTGGAGATCCAACACTACAAAGAGGCAAGTC---GTC-----  
GTGGAAACGCTCTTTAATGGAACCTTTAGCTTTAGCTGGTCGTGACCAAGAAACCCTGGTTTTCGCTTGGTGGGCCGGGAA  
CGCCCCGGCTTATCAATTTGTCCGGTAAACTACTCGGGGCTCACGTAGCCCATGCCGGATTAATCGTATTCTGGGCCGGAG  
CAATGAACCTATTTGAAGTGGCTCATTTTCGTACCAGAGAAACCCATGTATGAACAAGGATTGATTTTACTTCCCCATCTA  
GCTAC  
Nicotiana       GTTGCTATTCTGCATCC---  
AGAGGGGAGTACGTTTCGGTGGAAATAATTTCTTAGATGTATTACCGCATCCCCAAGGGTTAGGCCCACTTTTTACAGGTCA  
ATGGAATCTTTATGTCTCAAAACCCCGATTCAAGTAGTCATTTATTTGGTACCGCCCAAGGGGCGGGAACCTGCCATTCTAA  
CTCTTCTCGGGGATTTCCATCCACAAACGCAAAGTTTATGGCTGACTGATATTGCCCATCACCATTTAGCTATTGCATTT  
ATTTTTCTCGTTGCTGGTCATATGTATAGAACCAATTTTCGGGATTGGGCACAGTATGAAAGACCTTTTAGATGCACATAT  
TCCCCCGGGGGACGATTGGGGCGTGGACATAAGGGTCTTTATGACACAATCAATAATTCGCTTCATTTTCAATTAGGCC  
TTGCTCTAGCTTCTTTAGGGGTTATTACTTCTTTGGTAGCTCAACACATGTACTCTTTACCTGCTTATGCATTCATAGCA  
CAAGACTTTACTACTCAAGCTGCATTATATACCCACCACCAATATATCGCAGGATTCATCATGACAGGAGCTTTTGCTCA  
TGGAGCTATATTTTTTATTAGAGATTACAATCCGGAGCAAAATGAAGATAATGTATTGGCAAGAATGTTAGAGCATAAAG  
AAGCTATCATATCTCATTTAAGTTGGGCCAGCCTCTTTCTGGGATTCCATACCCTGGGACTTTATGTTTATAATGATGTC  
ATGCTTGCCCTTTGGCACTCCGGAGAAGCAAATCTTGATTGAACCTATATTTGCTCAATGGATAACAATCCGCTCATGGTAA  
AACTTCATATGGGTTTCGATGTACTTTTATCTTCAACGAGTGGTCCAGCATTCAATGCGGGTCAAGCATCTGGTTGCCGG  
GTTGGTTAAATGCTGTTAATGAAAATAGTAATTCATTATTTTAAACAATAGGTCCTGGAGACTTTTTGGTTTCATCATGCT  
ATTGCTCTTGGTTTACATACAACCTACATTGATCTTAGTAAAAGGTGCTTTAGATGCACGTGGTTCCAAGTTAATGCCAGA  
TAAAAGGATTTTCGGTTATAGTTTTCCGTGCGATGGCCCAGGACGAGGCGGTACTTGTGATATTTCCGGCATGGGACGCGT  
TTTATTTGGCAGTTTTTTGGATGTTAAATACTATTGGATGGGTTACTTTTTATTGGCATTGGAAGCACATCACATTATGG  
CAGGGTAAACGTTTTACAGTTTAAATGAATCTTCCACTTATTTGATGGGCTGGTTAAGGGATTATTTATGGTTAAACTCTTC  
ACAACCTATCAACGGATATAATCCTTTTGGTATGAATAGTTTATCGGTTTGGGCATGGATGTTCTTATTTGGACATCTTG  
TTTGGGCTACTGGATTTATGTTCTTAATTTCTTGGCGTGGATATTGGCAGGAATTGATTGAAACTTTAGCATGGGCTCAT  
GAACGCACACCTTTGGCCAATTTGATTTCGCTGGAGAGATAAACCAGTGGCCCTTTCCATTGTACAAGCAAGATTGGTTGG  
ATTAGCTCACTTTTTCTGTAGGTTATATATTTCACTTATGCGGCTTTCTTGATTGCCTCTACGTCGGGCAAATTTGGT---  
ATGTCACATTCAGTAAAGATTTATGATACGTGTATAGGATGACTCAATGTGTCCGAGCCTGCCCCACCGATGTATTAGA  
AATGATACCTTTGGGACGGTTGTAAGGCTAAACAAATTGCTTCTGCTCCACGAACAGAGGACTGTGTTGGTTGTAAGAGAT  
GTGAATCCGCTGTCCAACAGATTTCTTGAGTGTCCGAGTTTATTTATGGCATGAAACAACCTCGCAGTATGGGTCTAGCT  
TAT-----  
CTTCCATCTATTTTTGTGCCGTTAGTAGGCCTAGTCTTTCCGGCAATTGCAATGGCTTCTTTATTTCTTCATGTTCAAAA  
AAATAAGATTGTT---ATGCGAGATCTAAAAACATATCTCTCT---  
GTGGCACCAGTACTAAGTACGCTATGGTTCGGGGCTTTAGCAGGTCTATTGATAGAGATTAATCGTTTTTTCCCGGATGC  
GTTGACATTTCCCTTTTTTTTCATT---  
ATGACTGCAATTTTAGAGAGACGCGAAAGCGAAAGCCTATGGGGTCGCTTCTGTAACCTGGATAACTAGCACTGAAAACCG  
TCTTTACATTGGATGGTTTTGGTGTTTTTGATGATCCCTACCTTATTGACGGCAACTTCTGTATTTATTATTGCCTTCATTG  
CTGCTCCTCCAGTAGACATTGATGGTATTCGTGAACCTGTTTCAGGGTCTCTACTTTACGGAAACAATATTATTTCCGGT  
GCCATTATTCCTACTTCTGCAGCTATAGGTTTACATTTTTACCCAATCTGGGAAGCGGCATCCGTTGATGAATGGTTATA  
CAACGGTGGTCCTTATGAACATAATTGTTCTACACTTCTTACTTGGCGTAGCTTGTTACATGGGTGCTGAGTGGGAGCTTA  
GTTTCCGTCTGGGTATGCGACCTTGGATTGCTGTTGCATATTCAGCTCCTGTTGCAGCTGCTACCGCAGTTTTCTTGATC  
TACCAATTGGTCAAGGAAGTTTTTCTGATGGTATGCCTCTAGGAATCTCTGGTACTTTCAATTTTCATGATTGTATTCCA  
GGCTGAGCACAACATCCTTATGCACCCATTTACATGTTAGGCGTAGCTGGTGTATTTCGGCGGCTCCCTATTCAGTGCTA  
TGCATGGTTCCCTTGGTAACTTCTAGTTTGTATCAGGGAAACCACAGAAAATGAATCTGCTAATGAAGGTTACAGATTCCGT  
CAAGAGGAAGAAAACCTTATAACATCGTAGCCGCTCATGGTTATTTTTGGCCGATTGATCTTCCAATATGCTAGTTTCAACAA  
CTCTCGTTTCGTTACACTTCTTCTAGCTGCTTGGCCTGTAGTAGGTATCTGGTTTACCCTTTAGGTATCAGCACTATGG  
CTTTCAACCTAAATGGTTTTCAATTTCAACCAATCTGTAGTTGACAGTCAAGGCCGTGTAATTAATACTTGGGCTGATATC  
ATTAACCGTGCTAACCTTGGTATGGAAGTTATGCATGAACGTAATGCTCACAACCTTCCCTCTAGACCTA---  
GCTGCTATCGAAGCTCCATCTACAAATGGA---  
ATGGGTTTGCCTTGGTATCGTGTTCATACCGTTGTATTGAATGATCCCGGTGCGTTGCTTTCTGTTTCATATAATGCATAC  
AGCTCTGGTTGCTGGTTGGGCCGGTTCGATGGCTCTGTATGAATTAGCGGTTTTTGTATCCTTCTGATCCTGTTCTTGATC  
CAATGTGGAGACAGGGTATGTTTCGTTATACCCCTTCATGACTCGTTTAGGAATAACCAATTCATGGGGCGGTTGGAGTATC  
ACAGGGGGGACTGTAACGAATCCGGGTATTTGGAGTTACGAAGGTGTAGCTGGAGCACATATTGTGTTTTCTGGCTTATG  
CTTTTTGGCAGCTATCTGGCATTGGGTGTATTGGGATCTAGAAATATTTTGTGATGAACGTACAGGAAAACCTTCTTTGG  
ATTTGCCAAAGATCTTTGGAATTCATTTATTTCTCTCAGGGGTGGCTTGCTTTGGTTTTGGTGCATTTTCATGTAACAGGC

TTGTATGGTCCCGGAATATGGGTGTCCGACCCTTATGGACTAACGGGAAAAGTACAACCTGTAAATCCAGCGTGGGGCGT  
GGAAGGTTTTGATCCTTTTTGTTCCAGGAGGAATAGCCTCTCATCATATTGCAGCAGGAACATTGGGCATATTAGCGGGCC  
TATTCCATCTTAGCGTCCGTCCGCCACAACGTCTATACAAAGGATTGCGTATGGGAAATATTGAAACCGTCTTTCCAGT  
AGTATCGCTGCTGTCTTTTTTGCAGCTTTTGTGTTGCCGGAACCTATGTGGTATGGTTCCGGCAACAACCCCGATTGAATT  
ATTTGGGCCCCTCGTTACCAATGGGATCAGGGGACTTCCAGCAAGAAATATATCGAAGAGTTAGTGCTGGGCTAGCAG  
AAAATCAAAGTTTATCAGAAGCCTGGTCTAAAATTCCTGAAAAATTAGCTTTTTATGATTACATCGGCAATAATCCGGCA  
AAAGGGGGATTATTAGAGCGGGCTCAATGGATAACGGGGATGGAATAGCGGTTGGATGGTTAGGACACCCTATCTTTAG  
AGATAAAGAAGGCCGTGAACTTTTTGTACGTGCTATGCCTACTTTTTTGAACATTTCCGGTCTGTTTTGGTAGATGGCG  
ATGGAATTGTTAGAGCCGATGTTCCTTTTAGAAGGGCAGAATCGAAGTATAGTGTTGAACAAGTAGGTGTAACCTGTTGAG  
TTCTACGGCGGTGAACTCAACGGCGTCAGTTATAGTGATCTGTCTACTGTGAAAAATATGCTAGACGTGCTCAATTGGG  
TGAAATTTTTGAATTAGATCGTCTACTTTGAAATCCGATGGTGTTTTTTCGTAGCAGTCCAAGGGGTTGGTTTTACTTTTTG  
GGCATGCTTCGTTTTGCTTTTCTTTCTTCGGACACATTTGGCATGGTGTCTAGAACCTTGTTTCAGAGATGTTTTTGT  
GGTATTGACCCAGATTTAGATGCTCAAGTCAAGTTGGAGCATTCCAAAA---  
CTTGGAGATCCAATAACAAAAGACAGGCA---GCC-----  
ATGAAACCTTATATTCCCTGAGGAGGTTCTACCACGTGGAAACGCTCTTTAATGGAACCTTTAGCCTTAGCTGGTCTGTA  
CCAAGAAACCACTGGTTTTGCTTGGTGGGCGGGAATGCCCGACTTATCAATTTATCCGGTAAACTACTAGGGGCTCATG  
TAGCCCATGCTGGATTAATCGTATTCTGGGCCGGAGCAATGAACCTATTTGAAGTGGCCATTTTCGTACCAGAGAAGCCT  
ATGTATGAACAAGGATTAATTTTTACTTCCCCACCTAGCTAC  
Nuphar GTCGCTATTCCCGGATCA---  
AGGGGTGAATACGTCAGATGGAATAATTTCTTAGATGTATTACCATATCCCCAAGGATTGGGGCCACTTTTTACAGGTCA  
GTGGAATCTTTATGCCCAAAACCCCGATTCCAGTAGTCATTTATTTCGGTACCTCCAAGGAGCGGGAACCTGCCATTCTAA  
CCCTTCTCGGGGATTCCATCCGCAAACCTCAAAGTTTATGGCTGACCGATATTGCCCATCATCATTTAGCTATTGCATTT  
ATTTTTCTCGTTGCTGGTCATATGTATAGAATAACTTCGGGATTGGGCACAGTATTAAGATCTTCTAGAGGGCGCATAT  
TCCTCCGGGGGGTTCGATTGGGACGTGGGCATAAAGGTCTTTATGACACAATCAATAATTCGATTCATTTTCAATTAGGTC  
TTGCTCTAGCCTCTTTGGGAGTTGTTACTTTCCTTGGTAGCTCAACACATGTACTCTTTACCTGCTTATGCATTCATAGCA  
CAAGACTTTACTACTCAAGCTGCATTATATACTCATCACAATACATCGCAGGGTTCATCATGACAGGAGCCTTTGCTCA  
TGGAGCTATATTCTTCATTAGGGATTACAATCCGCAGCAGAATGAGGATAATGTATTGGCAAGAATGTTAGACCATAAAG  
AAGCTATCATATCTCATTTAAGTTGGGCTAGCTTGTTCCTGGGTTCCATACTTTGGGACTCTATGTTTATAATGACGTC  
ATGCTTGCTTTTTGGTACTCCAGAAAAACAACTTTGATCGAACCCTATTTGCCCAATGGATACAGTCCGCTCATGGTAA  
GACTTTCATATGGGTTTCGATGCTACTTCTTCAACGAATGGCCAGCATTTAATGCTGGTCAAAGCTTATGGTTACCTG  
GCTGGTTGAATGCTATTAATGAAAATCGTAATTCACTATTCTTAACAATAGGGCCCGGGACTTCTTGGTACATCATGCT  
ATTGCTCTAGGTTTGATACAATACTACATTGATCTTAGTAAAAGGTGCTTTAGATGCACGTGGTTCCAAGTTAATGCCAGA  
TAAAAAAGATTTTTGGGTATAGTTTCCCCTGCGATGGTCCAGGACGAGGTGGTACTTGTGATATTTCCGGCTTGGGACGCAT  
TTTTTTGGCAGTTTTCTGGATGTTAAATACCATTGGATGGGTTACCTTCTATTGGCATTGGAAGCATATCACATTATGG  
CAGGGTAATGTTTCGCAATTTAATGAATCTTCCACTTATTTGATGGGATGGTTAAGAGATTATCTATGGTTAAACTCTTC  
GCAACTTATCAACGGATATAATCCTTTTGGTATGAATAGTTTATCCGTCTGGGCGTGGATGTTCTTATTTGGGCATCTTG  
TTTGGGCTACTGGATTGATGTTCTTAATTTCCCTGGCGTGGATATTGGCAGGAATTGATTGAAACTTTAGCATGGGCTCAT  
GAACGCACACCTTTGGCTAATTTGATTGCTGGAGGGATAAACCAGGTGGCTCTTTCCATTGTACAAGCAAGATTGGTTGG  
CTTAGCTCACTTTTCTGTAGGTTATATATTTACCTACGCAGCTTTCTTGATTGCTTCTACATCGGGCAAATTTGGT---  
ATGTCACACTCAGTAAAGATTTATGATACATGTATAGGGTGTACCCAATGCGTACGAGCGTGTCTACAGATGTCCTGGA  
AATGATACCCTGGGACGGATGTAAGCTAAGCAAATTGCTTCCGCACCAAGAACGGAGGACTGTGTAGGTTGTAAGAGAT  
GTGAATCTGCTTGTCCAACGGATTTCTTAAGTATACGGGTTATTTATGGCATGAGACAACCCGTAGCATGGGTCTAGCT  
TAT---ATGACAGATCTCAAC---  
TTACCCTCTATTTTTGTGCCTTTAGTAGGCCTATTATTTCCGGCAATTGCAATGGCTTCTTTATTTCTCCATGTTCAAAA  
AAACAAAATTGTC---ATGCGAGATATCAAAACATACTTTCC---  
GTGGCGCCTGTGCTAACTACTCTATGGTTCGGTTCTTTAGCAGGTCTATTGATAGAGATCAATCGCTTATTCCCAGATGC  
GTTGACATTTCCCTTTTTTTTCATTTC---  
ATGACTGCAATTTTAGAGAGACGCGAAAGCACAAGCCTATGGGGTTCGCTTCTGCAACTGGATAACCAGCACTGAAAATCG  
TCTTTACATTGGATGGTTCCGGTGTTTTTGATGATCCCTACCCTATTGACCGCTACTTCTGTATTTATTATCGCCTTCATTG  
CGGCTCCTCCAGTAGATATTGATGGTATTCGTGAACCTGTTTCCGGTTCTCTACTTTATGGAAATAATATTATTTCTGGT  
GCCATTATTCCTACTTCTGCGGCTATAGGATTGCACCTTTACCCGATATGGGAAGCATCATCCGTCGATGAATGGTTATA  
TAATGGTGGTCTTATGAACATAATTGTTCTACACTTCTTACTTGGTGTAGCTTGTACATGGGTGCTGAGTGGGAGCTTA  
GCTTCCGTCTGGGTATGCGCCCTTGGATTGCTGTTGCGTATTACAGCTCCTGTTGCAGCTGCTACTGCTGTTTTCTTGATC  
TACCCTATTGGTCAAGGAAGCTTCTCTGATGGTATGCCTCTAGGAATATCTGGTACTTTCAACTTCATGATTGTATTCCA  
GGCTGAACACAACATCCTTATGCATCCATTTACATGTTAGGCGTGGCTGGTGTATTCCGGCGGCTCTCTATTCCAGTGCTA  
TGCATGGTTCCCTGGTAACCTCTAGTTTGTATCAGGGAACTACTGAAAATGAGTCTGCTAATGCAGGTTACAGATTCCGT  
CAAGAGGAAGAAACCTATAATATCGTAGCTGCTCATGGTTATTTTGGCCGATTGATCTTCCAATATGCTAGTTTCAACAA

CTCTCGTTCCTTACACTTCTTCTAGCTGCTTGGCCTGTTGTAGGTATCTGGTTCACCGCTTTAGGTATCAGCACTATGG  
CATTCAACCTAAATGGATTCAATTTCAATCAATCCGTAGTTGACAGTCAAGGTCGTGTTATTAACACTTGGGCTGATATC  
ATTAATCGTGCTAACCTTGGTATGGAAGTTATGCATGAACGTAATGCTCACAACTTCCCTCTAGACCTA---  
GCTGCTGTCGAAGCTCCATCTACAAATGGA---  
ATGGGTTTGCCTTGGTATCGTGTTCATACTGTCGTATTGAATGATCCTGGTCGCTTGGCTTTCTGTCCATATAATGCATAC  
AGCTCTAGTTTCTGGTGGGCCGGTTCATGGCTCTATATGAATTAGCTGTTTTTGGATCCCTCTGATCCCGTTCTTGATC  
CAATGTGGCGACAAGGTATGTTTGGTATACCCCTTCATGACTCGTTTAGGAATAACCAATTCATGGGGCGGTTGGAGTATT  
ACAGGAGGAACATAACCAATCCAGGTATTTGGAGTTACGAAGGTGTTGCCGGGGCACACATTGTGTTTTCTGGCTTGTG  
CTTCTTGGCAGCTATCTGGCATTGGGTGTATTGGGATCTAGAAAATATTCTGCGATGAACGTACGGGAAAACCCCTCTTTGG  
ATTTGCCCAAGATCTTTGGAATTCATTTATTTTTATCTGGGGTGGCTTGCCTTGGGTTGGTGCATTTTCATGTAACAGGT  
TTGTATGGCCCTGGAATATGGGTGTCTGATCCTTATGGGCTAACCGGAAAAGTGCAACCTATAAGTCCTTCGTGGGGCGC  
GGAGGTTTTGATCCTTTTGGTCCGGGGGGAATAGCTTCTCATCATATTGCAGCGGGAACCTTGGGAATATTAGCGGGTC  
TATTCATCTTAGTGTCCGCCCGCCCAACGTCTATACAAAGCATTACGTATGGGGAATATTGAAACTGTGCTTTCCAGT  
AGTATCGCTGCTGTGTTTTTGCAGCGTTCGTTGTTGCTGGAACCTATGTGGTACGGTTCGCGACTACTCCGATCGAATT  
ATTTGGTCTACTCGTTATCAGTGGGATCAGGGATATTTCCAGCAAGAAATATATCGAAGAGTTAACGCCGGGCTAGCCG  
AAAATCTGAGTTTATCGGAATCTTGGTCTAAAATTCGCGATAAACTAGCTTTTTATGATTACATCGGTAATAATCCGGCG  
AAAGGAGGATTGTTTCCAGAGCCGGCTCAATGGACAACGGAGATGGAATAGCTGTTGGGTGGTTAGGACACCCTATCTTTAG  
AGATAAAGAGGGGCATGAACTTTTTGTACGTCGTATGCCTACCTTCTTTGAAACATTTCCGGTAGTTTTGGTAGATGGAG  
ACGGAATTGTGAGAGCCGATGTTCTTTTAGAAGGGCAGAATCAAAGTATAGTGTGCAACAAGTGGGTGTAACCTGTTGAG  
TTCTATGGTGGTGAACCTCGATGGAGTCAGTTATAATGATCCTGCTACTGTGAAAAAATATGCTAGACGTGCCAGTTGGG  
TGAAATTTTTGAAATGGATCGCGCTACTTTGAAATCCGATGGTGTTTTTCGTAGTAGTCCAAGGGGTTGGTTCACTTTTG  
GACATGCTTCGTTTGGCTTTGCTTTTTCTTTTTCGGCCACATTTGGCATGGTGTGCTAGAACCTTGTTCAGAGATGTTTTGCT  
GGTATCGACCCAGATTTAGATGCTCAAGTGAATTTGGAACCTTCCAGAAA---  
CTAGGAGATCCAACCTACAAGGAGACAAGTA---GTC-----  
ATGAAAACCTTATATTCCTGAGGAGGTTCTACCCCGTGGAACGCTCTTTAATGGAACCTTTAGCTTTAGCTGGTCTGTA  
CCAAGAAACCACCGGTTTTCGCTTGGTGGGCGGGGAATGCCCGACTTATCAATCTGTCCGGTAAATTACTCGGAGCTCACG  
TGGCCCATGCCGATTAATCGTATTCTGGGCTGGAGCAATGAACCTATTTGAAGTGGCTCATTTTCGTACCGGAGAAGCCT  
ATGTATGAACAAGGATTGATTTTACTTCCCCATCTAGCTAC  
Nymphaea GTTGCTATTCCCGGATCA---  
AGGGGTGAATATGTGATGGAATAATTTCTTAGATGTATTACCATATCCCCAAGGATTGGGGCCACTTTTTACAGGTCA  
GTGGAATCTTTATGCCCAAAACCCCGATTCCAGTAGTCATTTATTTCGGTACCTCCCAAGGAGCGGGAACCTGCCATTCTAA  
CCCTTCTCGGGGATTCCATCCGCAAACCTCAAAGTTTTATGGCTGACCGATATTGCCCATCATCATTTAGCTATTGCATTT  
ATTTTTCTCGTTGCTGGTCATATGTATAGAATAACTTCGGGATTGGGCACAGTATAAAAAGATCTTCTAGAGGCGCATAT  
TCCTCCGGGGGGTTCGATTGGGGCGCGGGCATAAAGGCCTTTATGACACAATCAATAATTTCGATTCATTTTCAATTAGGTC  
TTGCTCTAGCCTCTTTGGGGGTTATTACTTTCCTTGGTAGCTCAACACATGTACTCTTTACCTGCTTATGCATTATAGCA  
CAAGACTTTACTACTCAAGCTGCGTTATATACTCATACCAATACATCGCAGGGTTCATCATGACAGGAGCCTTTGCTCA  
TGGAGCTATATTCTTCATTAGGGATTACAACCCGAGCAGAATGAGGATAATGTATTGGCAAGAATGTTAGACCATAAGG  
AAGCTATCATATCTCATTTAAGTTGGGCTAGCTTGTTCCTGGGGTTCATACCTTGGGACTCTATGTTTATAATGACGTC  
ATGCTTGGTTTTGGTACTCCAGAAAAACAAATCTTGATCGAACCCATATTTGCCCAATGGATACAGTCCGCTCATGGTAA  
GACTTCATATGGGTTTATGACTCTTATCTTCAACGAATGGCCCAGCATTTAATGCAGGTCAAAGCTTATGGTTACCTG  
GCTGGTTGAATGCTATTAATGAAAATCGTAATTCACTATTCTTAAACAATAGGGCCGGGGGACTTCTTGGTACATCATGCT  
ATTGCTCTAGGGTTGCATACAACCTACATTGATCTTAGTAAAAGGTGCTTTAGATGCACGTGGTTCCAAGTTAATGCCAGA  
TAAAAAGATTTCCGGTATAGTTTCCCCTGCGACGGTCCAGGACGAGGTGGTACTTGTGATATTTCCGGCTTGGGATGCAT  
TTTATTTGGCAGTTTTCTGGATGTTAAATACCATTGGATGGGTTACCTTCTATTGGCATTGGAAGCATATCACATTATGG  
CAGGGTAATGTTTCGCAATTTAATGAATCTTCCACTTATTTGATGGGATGGTTAAGAGATTATCTATGGTTAAACTCTTC  
ACAACCTATCAACGGATATAATCCTTTTGGTATGAATAGTTTATCCGTCTGGGCGTGGATGTTCTTATTTGGGCATCTTG  
TTTTGGGCTACTGGATTCATGTTCTTAATTTCTGGCGTGGATATTGGCAGGAATTGATTGAAACTTTAGCATGGGCTCAT  
GAAACGCACACCTTTGGCTAATTTGATTGCTGGAGGGATAAACCAGGTGGCTCTTCCATTGTACAAGCAAGACTGGTTGG  
CTTAGCTCACTTTTCTGTAGGTTATATATTTTACCTACGCAGCTTTCTTGATTGCTTCTACATCAGGCAAATTTGGT---  
ATGTCACACTCAGTAAAGATTTATGATACATGTATAGGGTGTACCCAATGCGTACGAGCGTGTCTACAGATGTCCTGGA  
AATGATACCCTGGGACGGATGTAAAGCTAAGCAAATTGCTTCCGCACCAAGAACGGAGGACTGTGTAGGTTGTAAGAGAT  
GTGAATCCGCTTGTCCAACGGATTTCTTAAAGTGTACGGGTTTATTTATGGCATGAGACAACCCGTAGCATGGGTCTAGCT  
TAT---ATGACAGATCTCAAC---  
TTACCCTCTATTTTTGTGCCTTTAGTAGGCCTATTATTTCCGGCAATTGCAATGGTTTTCTTTATTTTTCCATGTTCAAAA  
AAACAAGATTGTC---ATGCGAGATATCAAAACATACTTTCC---  
GTAGCGCCTGTGCTAACTACTCTATGGTTCGGTTCTTTAGCAGGTCTATTGATAGAGATCAATCGTTTTATTCCAGATGC  
GTTGACATTCCCTTTTTTTTTTTCATT---



ATGACTGCAATTTTAGAGAGACGCGAAAGCACAAAGCCTATGGGGTCGCTTCTGCAACTGGGTAACCAGCACTGAAAATCG  
TCTTTACATTGGATGGTTCCGGTGTGTTTATGATATCCCTACCCTATTGACCGCTACTTCTGTATTTATTATCGCCTTCATTG  
CGGCTCCTCCAGTAGATATTGATGGTATTCGTGAACCTGTTTCTGGTTCTCTACTTTATGGAAATAATATTATTTCTGGT  
GCCATTGTTCCCTACTTCTGCGGCTATCGGGTTGCATTTTTACCCGATATGGGAAGCATCATCCGTTGATGAATGGTTATA  
CAATGGCGGTCCTTATGAACATAATTGTTCTACACTTCTTACTTGGTGTAGCTTGTACATGGGTCGTGAGTGGGAGCTTA  
GCTTCCGTCTGGGTATGCGCCCTTGGATTGCTGTTGCGTATTAGCTCCTGTTGACAGCTGCTACTGCTGTTTTCTTGATC  
TACCCTATTGGTCAAGGAAGCTTCTCTGATGGTATGCCTCTAGGAATATCTGGTACTTTCAACTTCATGATTGTATTCCA  
GGCTGAACACAACATCCTTATGCATCCATTCCACATGTTAGGTGTGGCTGGTGTATTTCGGCGGCTCTCTATTAGTGCTA  
TGCATGGTTCCTTGGTAACCTCTAGTTTGTATCAGGGAAACTACTGAAAATGAGTCTGCTAATGAAGGTTACAGATTCCGT  
CAAGAGGAAGAAACCTATAATATCGTAGCTGCTCATGGTTATTTGGCCGATTGATCTTCCAATATGCTAGTTTCAACAA  
CTCTCGTTCCCTTACACTTCTTCTAGCTGCTTGGCCTGTTGTAGGTATCTGGTTACCCTTTAGGTATCAGCACTATGG  
CATTCAACCTAAATGGATTCAATTTCAATCAATCCGTAGTTGACAGTCAAGGTCGTGTTATTAACACTTGGGCTGATATC  
ATTAATCGTGCTAACCTTGGTATGGAAGTTATGCATGAACGTAATGCTCACAACTTCCCTCTAGATCTA---

GCTGCTGTCGAAGCTCCATCCACAAATGGA---  
ATGGGTTTGCCTTGGTATCGTGTTCATACTGTCGTATTGAATGATCCTGGTTCGCTTGGCTTTCTGTCCATATAATGCATAC  
AGCTCTAGTTTCTGGTGGGCGGTTCTATGGCTCTATACGAATTAGCTGTTTTGATCCCTCTGATCCCGTTCTTGATC  
CAATGTGGCGACAAGGTATGTTTCGTTATACCCTTCATGACTCGTTTAGGAATAACCAATTCATGGGGCGGTTGGAGTATT  
ACAGGAGGAAGTGAACCAATCCGGGTATTTGGAGTTACGAAGGTGTTGCCGGGGCACACATTGTGTTTTCTGGCTTGTG  
CTTCTTGGCAGCTATCTGGCATTGGGTGTATTGGGATCTAGAAATATTCTGTGATGAACGTACGGGAAAACCTCTTTGG  
ATTTGCCAAGATCTTTGGAATTCATTTATTTTTATCTGGGGTGGCTTGGCTTTGGGTTTGGTGCATTTTCATGTAACAGGT  
TTGTATGGCCCTGGAATATGGGTGTCTGATCCTTATGGGCTAACCGGAAAAGTGAACCTGTAAATCCTTCATGGGGCGC  
GGAGGGTTTTGATCCTTTTGTTCGGGGGGGATAGCTTCTCATCATATTGCAGCGGGCACCTTGGGAATATTAGCGGGTC  
TATCCATCTTAGTGTCCGCCCCGCCCAACGTCTATACAAAGCATTACGTATGGGCAATATTGAAACTGTGCTTTCCAGT  
AGTATCGCTGCTGTGTTTTTGCAGCTTTCGTTGTTGCTGGAACCTATGTGGTATGGTTCAGCGACTACTCCGATCGAATT  
ATTTGGTCTACTCGTTATCAGTGGGATCAGGGATATTTCCAGCAAGAAATATATCGAAGAGTTAACGCCGGGCTAGCTG  
AAAATCTGAGTTTATCGGAATCTTGGTCTAAAATCCCCGATAAACTAGCTTTTTATGATTATATCGGTAATAATCCGGCG  
AAAGGAGGATTGTTTCAGAGCCGGCTCAATGGACAACGGGGATGGAATAGCTGTTGGGTGGTTAGGACACCCTGTCTTTAG  
AGATAAAGAGGGGATGAACTTTTGTACGTCTGATGCCTACCTTCTTTGAAACATTTCCGGTAGTTTGGTAGATGGAG  
ACGGAATTTGTAGAGCCGATGTTCCTTTTAGAAGGGCGGAATCAAAGTATAGTGTGCAACAAGTGGGTGTAACCTGTTGAG  
TTCTATGGTGGTGAACCTGATGGAGTCAGTTATAATGATCCTGCTACTGTGAAAAAATATGCTAGACGTGCCCAATTGGG  
TGAAATTTTTGAATTGGATCGCGCTACTTTGAAATCCGATGGTGTGTTTTTCGTAGTAGTCCAAGGGGTTGGTTCACTTTTG  
GACATGCTTCGTTTGGCTTTGCTTTTTCTTTTTCGGCCACATCTGGCATGGTGTGCTAGAACCTTGTTCAGAGATGTTTTGCT  
GGTATCGACCCAGATTTAGATGCTCAAGTGAATTTGGAGCCTTCCAAAAA---

CTGGGGGATCCAATAAGGAGACAAGTA---GTC-----  
ATGAAAACCTTATATCCCTGAGGAGGTTCTACCCCGTGGAAACGCTCTTTAATGGAACCTTTAGCTTTAGCTGGTTCGTGA  
CCAAGAAACCACCGGTTTCGCTTGGTGGGCGGGGAATGCCCGACTTATCAATCTGTCCGGTAAATTAATCGGAGCTCACG  
TGGCCCATGCCGATTAATCGTATTCTGGGCTGGAGCAATGAACCTATTTGAAGTGGCTCATTTTCGTACCAGAGAAGCCT  
ATGTATGAACAAGGATTGATTTTACTTCCCCATCTAGCTAC

Oenothera GTCGCTATTCCAGGATCC---  
AGGGGGGAATCCGTTTCGATGGAATAATTTCTTAGATGTATTACCGCATCCCGAAGGGTTAGGACCCCTTTTTACAGGCCA  
GTGGAATCTTTATGCCCAAAACCCCGATTCAAGTAGTCATTTATTTGGTACTTCCCAAGGATCGGGAACTGCCATTCTCA  
CCCTTCTAGGTGGATTCCATCCACAAACGCAAAGTTTATGGTTGACTGATATGGCTCATCATATTTGGCTATTGCATTT  
CTTTTTCTCATTGCTGGTTCATATGTATAGAACCAACTTCGGGATTGGGCACAGTATAAAAAGATCTTTTAGAAGCGCATAC  
CCCTCCGGGGGGGCGATTGGGGCGTGGACATAAGGGTCTTTATGACACAATCAATAATTCGATTCATTTTCAATTAGGCC  
TTGCCCTCGCCTCTTTAGGTGTTATTACTTCCCTGGTAGCCCAACACATGTACTCTTTGCCTGCTTATGCGTTCATAGCA  
CAAGACTTTACTACTCAAGCTGCGTTATATACTCATACCAATAACATGTCAGGATTTCATCATGACGGGGGCTTTTGC  
TGGGCTATATTTTTCAATTAGAGATTACAATCCGGAACAGAATGAGGATAATGTATTGGCAAGAATGTTAGACCATATAG  
AAGCTATTATATCCATTTAAGTTGGGCCAGCCTCTTTTTGGGGTTCCATACTTTGGGACTTTATGTTTATAATGATGTC  
ATGCTTGGTTTTGGTACTCCGGAGAAACAAATATTGATCGAACCTATATTTGCCCAATGGAGACAATCTGCTCATGGTAA  
AACCTCGTATGGTTTTGATGACTTTTTATCTTCAACGAATAGCCCGGCATTTAATGCGGTTGCAAGCATATGGTTGCCCG  
GTTGGTTAAATGCTATTAATGAGAATAGTAATTCATCTTAAACAATAGGTCTGGAGACTTCTTGGTTCATCATGCG  
ATTGCTCTAGGGTCACATAACACTACATTGATCTTAGTAAAAGGTGCTTTAGATGCACGCGGTTCCAAATTAATGCCAGA  
TAAAAGGATCTCGGTTATAGTTTTCTTGCATGGTCCGGGACGAGGTGGTACTTGTGATATTTCCGCTTGGGACGCAT  
TTTTATTTGGCAGTTTTCTGGATGTTAAATACCATTGGATGGGCCACTTTGTATTGGCATTGGAAACACATCACATTATGG  
CAAGGTTTCGTTGCACAGTTTAAACGAATCTTCCACTTATCTAATGGGATGGCTAAGAGATTATCTTTGGTTAAACTCTTC  
ACAACCTTATCAATGGGTTTAAATCCTTTTTGGATTGAATAGTTTATCAGTCTGGGCTGGATGTTCTTATTTGGACATCTTG  
TTTGGGCTACGGGATTTATGTTCTTAATTTCTGGCGTGGATATTGGCAGGAATTGATTGAAACTTTAGCATGGGCTCAC

GAACGGACGCCCTTGGCTAATTTGATTGGTGGAGAGATAAACCGGTGGCTCTTTCCATTGTGCAAGCAAGATTGGTTGG  
ATTAGCCCACTTTTCTGTAGGTTATATATTTCACTTATGCGGCTTTCTTGATTGCTTCGACATCAGGCAAATTTGGT---  
ATGTCGCATTTCAGTAAAGATTTATGATACCTGTATAGGATGTACTCAATGTGTACGTGCCTGCCCGACGGACGTATTAGA  
AATGATCCCTTGGGATGGGTGTAAAGCCAAGCAAATTTGCTTCTGCTCCAAGAACAGAGGACTGTGTTGGTTGTAAGAGAT  
GTGAATCGGCCTGTCCAACGGATTTTTTGGAGCGTTCGAGTTATTTATGGCATGAAACAACCTCGAAGTATGGGTCTAGCT  
TAT-----  
CCCTCTATTTTTGTGCCTTTAGTGGGCCTAGTATTTCCGGCAATTGCAATGGCTTCTTTATCTCTTCATGTTGAAAACAA  
CAAGATTGTT---ATGCGAGATCTAAAAACATATCTTTCC---  
GTCGCACCGGTACTAAGTGTCTCTGGTTCGGGGCTTTAGCGGGCCTATTGATAGAGATCAATCGTTTCTTTCCGGATGC  
CTTGACATTTCCCTTTTTTTCC-----  
ATGACTGCAATTTTAGAGAGACGCGAAAGCGAAAGCCTATGGGGTTCGCTTCTGTAAGTGGATAACCAGCACCAGAAACCG  
TCTTTACATCGGATGGTTTGGTGTTTTGGATGATCCCTACCCTATTGACCGCAACTTCTGTATTTATTATCGCCTTCATTG  
CTGCTCCTCCAGTAGATATTGATGGTATTCGTGAACCTGTTTCTGGATCTCTTCTTTATGGAAACAATATTATTTCCGGT  
GCCATTATTCTACTTCTGCAGCTATTGGTTTGCATTTTTACCCAATATGGGAAGCAGCATCTGTTGATGAATGGTTATA  
CAACGGTGGTCTTATGAGCTAATTGTTCTACACTTCTTACTTGGTGTAGCTTGTACATGGGCCGTGAGTGGGAACCTTA  
GTTTCCGTCTGGGTATGCGCCCTTGGATTGCTGTTGCGTATTAGCTCCTGTTGCAGCTGCTACTGCTGTTTTCTTGATC  
TATCCAATTGGTCAAGGAAGTTTTTCTGATGGTATGCCTCTAGGAATTTCTGGTACTTTCAACTTCATGATTGTATTCCA  
GGCGGAGCACAACATCCTTATGCACCCATTCCACATGTTAGGCGTAGCTGGTGTATTTCGGCGGCTCCCTATTAGTGCTA  
TGCATGGTTCCTTGGTAACCTCTAGTTTGTATCAGGGAAACCACAGAAAATGAATCTGCTAATGAAGGTTACAGATTCCGT  
CAAGAGGAAGAACTTATAATATCGTAGCTGCTCACGGTTATTTTGGCCGATTGATCTTCCAATACGCGAGTTTCAACAA  
CTCTCGTTCTTTACATTTCTTCTTAGCTGCTTGGCCTGTAGTAGGTATCTGGTTCACTGCTTTAGGTATTAGCACCATGG  
CTTTCAACCTAAATGGTTTTCAATTTCAACCAATCTGTAGTTGATAGTCAAGGTCGTGTAATTAATACCTGGGCGGATATT  
ATTAACCGTGCTAACCTTGGTATGGAAGTTATGCACGAGCGTAACGCCATAACTTCCCTCTAGACCTA---  
GCTGCTGTTGAAGCTCCATCTACAAATGGA---  
ATGGGTTTGCCTTGGTATCGTGTGCATACCGTTCGATTGAATGATCCTGGCCGTTTGGTGGCTGTCCATATAATGCATAC  
AGCTTTGGTTGCTGGTGGGCCGGTTCGATGGCTTTATATGAATTAGCCGTTTTTGGATCCCTCTGACCCCGTTCTTGATC  
CAATGTGGAGACAAGGTATGTTTCGTTATACCCTTCATGACTCGTTTAGGAATAACTAATTCATGGGGTGGTTGGAGTATC  
ACAGGGGAACATGTAACGAATCCGGGTATTGGAGTTACGAAGGTGTGGCCGGCTCACATATTTCTGTTTCTGGCTTGTG  
CTTCTTGGCAGCTATCTGGCATTGGGTGTATTGGGATTTAGCAATATTTTCTGATGAACGCACAGGAAAACCTTCTTTAG  
ATTTGCCCAAGATCTTTGGAATTCATTTATTTCTTTTCCAGGGCTAGCTTGGCTTTGGTTTTGGCGCATTTTCATGTAACAGGG  
TTGTATGGTCTGGAATCTGGGTGTCCGATCCTTATGGACTAACTGGAGAGGTACAACCTGTAAATCCAGCATGGGGCGT  
AGAAGGTTTTGATCCTTTTTGTTCCAGGAGGAATAGCCTCTCATCATATTGCAGCGGGGACTTTAGGTATATTGGCGGGTC  
TATTTTCATCTTAGTGTCCGTCGCCCAACGCTCTCTACAAGGGATTGCGTATGGGCAATATTGAAACCGTCTTTTCCAGT  
AGTATTGCTGCTGTCTTTTTTGCAGCTTTTGTGTTGCTGGAACATATGTGGTATGGTTCAGCAACTACCCCTATTGAATT  
GTTTGGTCCCACCCGTTATCAATGGGATCAGGGATACTTCCAGCAAGAAATATATCGAAGAGTTGGCGCGGGGCTAGCCA  
AAAATCAAAGCTTATCAGAAGCGTGGTCTAAAATTCCTGAAAAATTTGGCTTTTTTATGATTACATCGGGAATAATCCTGCA  
AAAGGGGGATTATTTCAGAGCGGGTCAATGGACAGCGGGGATGGAATAGCCGTTGGGTGGTTAGGACATCCTATCTTTAG  
AGATAAAGAGGGGCGTGAACTTTTTGTACGTCGTATGCCTACTTTTTTTGAAACATTTCCGGTTGTTTTGGTAGACGGAG  
ACGGAATTGTTAGAGCCGACGTTCTTTTAGAAGGGCAGAATCGAAGTATAGTGTGGAACAAGTAGGTGTAACCATCGAG  
TTCTATGGTGGCGAACTCAATGGAGTCAGTTATAGTGACCCTGCTACTGTTAAAAAATATGCTAGACGCGCTCAATTAGG  
TGAAATTTTTGAATTAGATCGCGCTACTTTGAAATCGGATGGTGTTTTTCGTAGCAGTCCGAGAGGCTGGTTTTACTTTTG  
GGCATGCTTCGTTTGGTCTGCTCTTCTTCTTCGGGCACATTTGGCACGGTGTGTAACCCCTCTTCAGAGATGTTTTTGGT  
GGTATTGACCCGGATTGGATACGCAAGTGAATTTGGAGCATTCCAAAA---  
CTTGGAGATCCAACCTACAAGAAGACAAGCA---GTC-----  
ATGAAAACCTTATATCCCTGAGGAGGTTCTACCCCGTGGAAACGCTCTTTAATGGAACCTTTAGCTTTAGCTGGTTCGTGA  
CCAAGAAACTACCGGTTTCGCTTGGTGGGCCGGGAATGCACGACTTATCAATTTATCCGGTAAACTTTTGGGGGCTCATG  
TAGCCCATGCCGATTAATCGTATTTCTGGGCCGGAGCAATGAACCTATTTGAAGTGGCTCATTTTGTACCAGAGAAGCCC  
ATGTATGAACAAGGATTAATTTTACTTCCGCACTTAGCCAC  
Oryza GTCGCTATTCCAGCATCC---  
AGGGGAGAGTACGTTTCGATGGAATAATTTCTTAGATGTATTACCCTATCCACAGGGGTTGGGACCCCTTCTGACGGGTCA  
GTGGAATCTTTATGCCCAAAACCCCGATTTCGAGTAATCATTTATTTGGTACCCTCAAGGAGCGGGAACCTGCTATTCTAA  
CTCTTCTTGGGGGATTCCATCCACAAACACAAAGTTTTGTGGCTGACCGATATTGCTCATCATCATTTAGCTATTGCATTT  
ATTTTTCTCATTGCCGGTCAATGTATCGAACTAATTCGGAATTTGGGCACAGTATCAAAGATCTTTTAGAAGCACATAC  
TCCTCCGGGGGGTTCGATTAGGGCGTGGGCATAAGGGCCTTTACGACACAATCAATAATTCGATTCAATTTCAATTAGGTC  
TTGCTCTAGCTTCTTTAGGGGTTATTACTTCTTCTTAGTAGCTCAACATATGTACTCTTTACCTTCTTATGCATTTCATAGCA  
CAAGACTTTACTACTCAAGCAGCTTTATATACTCATACCAATACATTGCAGGGTTCATCATGACAGGGGCTTTTGGTCA  
TGGAGCTATTTTTTTTATTAGAGATTACAATCCGGAACAGAATGAGGATAATGTATTGGCAAGAATGTTAGACCATAAAG

AAGCTATCATATCTCATTAAAGTTGGGCTAGTCTCTTCTTAGGATTCCATACTTTGGGCCTTTATGTTTCATAATGACGTC  
ATGCTTGGCTTTTGGTACTCCAGAAAAGCAAATCTTGATCGAACCTATATTTGCTCAATGGATAACAATCGGCTCATGGTAA  
GACGACATATGGGTTTCGATATACTCTTATCTTCAACGAGCGGTCCCGCTTTCAATGCGGGTCGAACCCCTATGGTTACCCG  
GATGGTTGAATGCTGTTAACGAGAATAGTAATTCGCTTTTCTTAACAATAGGACCTGGAGATTTCTTGGTTTCATCATGCT  
ATTGCTTTAGGTTTGCATACAACCTACATTGATTTTAGTAAAGGGTGCTTTAGATGCACGCGGTTCCAAATTAATGCCGGA  
TAAAAAGATTTTGGATATAGTTTCTTGGCAGCGCCCTGGTCGCGGCGGTACTTGTGATATTTCTGCTTGGGACGCGT  
TTTATTTGGCAGTTTTCTGGATGTTAAATACCATTGGATGGGTTACTTTTTATTGGCATTGGAAACACATCACATTATGG  
CAGGGCAACGTTTTACAATTTAATGAATCCTCCACTTATTTGATGGGATGGTTAAGAGATTACCTATGGTTAAACTCTTC  
ACAACCTATCAATGGATATAATCCTTTTGGGATGAATAGTTTATCGGTATGGGCGTGGATGTTCTTATTTGGACATCTTG  
TTTGGGCGACTGGATTTATGTTCTTAATTTCTGGCGTGGATATTGGCAGGAATTAATTGAGACTTTAGCATGGGCTCAT  
GAACGGACACCTTTGGCTAATTTAATTCGCTGGAGAGATAAGCCCGTGGCTCTTTCCATTGTGCAAGCAAGATTTGGTGGG  
ATTAGCTCACTTTTCCGTGGGTTATATATTTCACTTATGCGCTTTCTTGGATTGCCTCAACATCAGGCAAGTTTGGT---  
ATGTCACATTTCCGTAAAAATTTATGATACATGTATAGGATGCACCTCAATGTGTACGAGCTTGTCCAACAGATGTATTAGA  
AATGATACCTTGGGATGGATGTAAAGCCAAGCAAATTGCTTCCGCGCCAAGAACCAGGATTGTGTGGGTTGTAAGAGAT  
GCGAATCCGCTGCCAACAGATTTTTTAAAGTGTCCGCGTTTATTTAGGACCTGAGACAACCCGCAGCATGGCTCTATCT  
TAT-----  
TTACCCTCTATTTTTCGTGCCTTTAGTAGGCTTAGTATTTCCGGCAATTGCAATGGCTTCTTTATTTCTTTATGTGCAGAA  
AAATAAGATTGTC---ATGCGGGATATAAAAAACATATCTCTCT---  
GTAGCACCCGTCGTAAGTACTCTATGGTTTGGGGCTTTACGAGGTTTATTGATAGAAATTAATCGTTTATTTCCAGATGC  
TTTGTCAATCCCTTTTTTTTTCATTC---  
ATGACTGCAATTTTAGAGAGACGCGAAAGTACAAGCCTGTGGGGTCGCTTCTGCAACTGGATAACTAGCACCGAAAACCG  
TCTTTACATCGGATGGTTCCGGTGTTTTGGATGATCCCTACCTTATTGACCGCAACTTCTGTATTTATTATCGCCTTCATCG  
CTGCCCTCCAGTAGATATTGATGGTATTCGTGAGCCTGTTTCTGGTTCTTTACTTTACGGAAACAATATTATCTCTGGT  
GCCATTATTCTACTTCTGCGGCGATCGGATTGCACCTTTACCCAATTTGGGAAGCTGCATCTGTTGATGAGTGGTTATA  
CAATGGTGGTCTTATGAGCTAATTGTTCTACACTTCTTACTTGGTGTAGCTTGTATATGGGTCGTGAGTGGGAAGTGA  
GTTTCCGTCTGGGATGCGTCTTGGATTGCTGTTGCATATTCAGCTCCTGTTGCAGCTGCTACTGCTGTTTTCTTGATT  
TACCCTATTGGTCAAGGAAGTTTCTCTGATGGTATGCCTTTAGGAATATCTGGTACTTTCAACTTTATGATTTGATTCCA  
GGCAGAGCATAACATCCTTATGCATCCATTTACATGTTAGGTGTAGCTGGTGTATTTCGGCGGTTCCCTATTTCAGTGTCA  
TGCATGGTTCTTGGTAACTCTAGTTTGTACAGGAAACCCTGAAACGAATCTGCTAATTGAGGGTTACAGATTTGGT  
CAAGAGGAAGAAACTTATAATATTGTGGCCGCTCATGGTTATTTTGGCCGATTAATCTTCCAATATGCTAGTTTTAACAA  
CTCTCGTTCTTTACACTTCTTCTTGGCTGCTTGGCCTGTAGTAGGGATTTGGTTCACTGCTTTAGGTATTAGTACTATGG  
CTTTCAATCTAAACGGATTCAATTTCAACCAATCTGTAGTTGATAGCCAAGGTCGCGTTATTAATACTTGGGCTGATATC  
ATCAACCGTGTAACTTGGTATGGAAGTAATGCACGAACGTAATGCTCACAACCTTCCCTCTAGACCTA---  
GCTGCTCTTGAAGTTCATCTCTTAATGGA---  
ATGGGTTTGCCTTGGTATCGTGTTCATACTGTGCTATTGAATGATCCGGGTCGATTGCTTTTCGGTGCATATAATGCACAC  
AGCTCTAGTTTCTGGTTGGGCTGGCTCGATGGCTTTTATACGAATTAGCGGTTTTTGGATCCCTCTGATCCTGTTCTGGATC  
CAATGTGGAGACAAGGTATGTTTCGTCATTCCTTTTCATGACTCGTTTAGGAATAACCAATTCGTGGGGTGGTTGGAGTATT  
TCAGGAGGAAGTGAACGAATCCGGGTATTTGGAGTTATGAAGGCGTGGCAGGGGCGCATATTGTGTTTTCTGGCTTGTG  
TTTCTTGGCAGCTATCTGGCATTGGGTATATTGGGACCTCGAAATATTCTGTGATGAGCGGACGGGAAAACCTTCTTTGG  
ATTTGCCCAAGATCTTTGGAATTCATTTATTTCTTGCAGGGGTGGCTTGGCTTTGGCTTTGGCGCATTTTCATGTAACCTGGT  
TTGTATGGTCTGGGATATGGGTGTCTGATCCTTATGGACTAACTGGAAAAGTACAAGCTGTAAATCCGGCGTGGGGTGC  
AGAAGGTTTTGATCCTTTTGTTCGGGGGGAATAGCTTCTCATCATATTGCTGCGGGTACATTGGGCATATTAGCGGGCC  
TATTCATCTTAGTGTCCGTCCACCTCAACGTCTATACAAAGGATTACGTATGGGCAATATTGAAACTGTACTTTCCAGT  
AGTATCGCTGCTGTTTTTTTTTGCAGCTTTCGTAGTTGCCGGAATATGTGGTATGGGTGAGCAACTACCCCAATTGAATT  
GTTTGGGCCTACTCGTTATCAGTGGGATCAGGGATACTTTTCCAGCAAGAAATATATCGAAGAGTTAGTGATGGGTAGCCG  
AAAATCTCAGTTTATCAGAAGCTTGGTCTAAAAATCCCGAAAAATTAGCCTTTTATGATTATATTGGTAATAATCCGGCA  
AAGGGGGGATTATTTCAGAGCAGGCTCAATGGACAATGGGATGGAATAGCTGTTGGATGGTTAGGACATCCTATCTTTAG  
AGATAAAGAAGGGCGCGAACTTTTTGTACGCCGTATGCCTACTTTTTTTGAAACATTTCCGGTTGTTTTGGTAGATGAAG  
AGGGAATTGTGAGAGCGGACGTTCTTTTAGAAGAGCAGAATCCAAATATAGTGTTGAACAAGTAGGCGTAACGGTGGAG  
TTCTATGGTGGCGAACTTAATGGAGTAAGTTATTCTGATCCTGCTACTGTAAAAAATATGCGAGGCGTTCCCAATTAGG  
GGAAATTTTTGAATTAGATCGGGCTACTTTGAAATCAGATGGTGTTTTTTTCGAGCAGTCCAAGGGGTTGGTTCACTTTTG  
GTCATGCTACCTTTGCTTTGCTCTTCTTTTTTTCGGACACATTTGGCATGGGGCTAGAACCTTGTTCGCAGATGTTTTTGT  
GGTATTGATCCAGACTTAGATGCTCAAGTGGAAATTTGGAGCAATCCAAAA---  
CGTGGAGATCCAACCTACAGGGAGACAGCCA---GTC-----  
ATGAAAATCTTATATTTCCCTGAGGAGGTTCTACCACGTGGAAACGCTCTTTAATGGAACTTTTGTTTTAGCTGGTCTGTA  
CCAAGAAACCACCGGTTTTGCTTGGTGGGCGGGGAATGCCAGACTTATCAATTTGTGCGGTAAACTACTTGGAGCTCACG

TAGCCCATGCAGGATTAATCGTATTCTGGGCCGGAGCAATGAACCTATTTGAAGTGGCCCATTTTCGTACCAGAAAAACCC  
ATGTATGAACAAGGGTTGATTTTACTTCCGCACTTAGCTAC  
Panax GTGGCTATTCTGCATCC---  
AGAGGGGAGTACGTTTCGATGGAATAATTTCTTAGATGTATTACCACACCCCCAAGGGTTAGGCCCACTTTTTACAGGTCA  
ATGGAATCTTTATGCTCAAAACCCCCGACTCAAGTAGTCATTTATTTGGTACCTCCCAAGGAGCAGGAAGTCCATTCTAA  
CCCTTCTCGGGGGATTCCACCCACAAACGCAAAGTTTATGGTTGACTGATATGGCTCATCATCATTTAGCTATTGCATTT  
ATTTTTCTCGTTGCTGGTCATATGTATAGAATAACTTCGGTATTGGGCACAGTATGAAAGATCTTTTAGATGCACATAT  
TCCTCCGGGGGGCGATTGGGACGTGGGCATAAGGGTCTTTATGACACAATCAATAATCCCTTCATTTTCAATTAGGCC  
TTGCTCTAGCTTCTTTAGGGGTTATTACTTCCTTGGTAGCTCAACACATGTACTCTTTACCTGCTTATGCATTCATAGCA  
CAAGACTTTACTACTCAAGCTGCGTTATATACTCATACCAATAACATCGCAGGATTTCATCATGCAGGAGCTTTTGTCTCA  
TGGAGCTATATTTTTCATTAGAGATTACAGTCCGGAACAGAATGAAGATAATGTATTGGCAAGAATGTTAGACCATAAAG  
AAGCTATCATATCTCATTTAAGTTGGGCCAGCCTCTTTCTGGGTTCCATACCTTGGGACTTTATGTTTCAATAATGATGTC  
ATGCTTGCCCTTGGTACTCCGGAGAAACAAATCTTGATCGAACCTATATTTGCTCAATGGATACAATCCGCACATGGTAA  
AACTTCATATGGTTTTCGATGTCCTTTTATCTTCAACGAATGGCCCCGCATTTAATGCGGGTTCGAAGCATATGGTTGCCCG  
GTTGGTTAAATGCTGTTAATGAGAATAGTAATTCACTATTCTTAAACAATAGGTCCGGGAGACTTTTTAGTTCATCATGCT  
ATTGCTCTGGGTTTACATACGACTACATTGATCTTAGTAAAGGGTGTCTTAGATGCACGTGGTTCCAAGTTAATGCCAGA  
TAAAAGGATTTTCGGTTATAGTTTTCCGTGCGACGGCCCCGGGACGGGGCGGTACTTGTGATATTTTCGGCTTGGGACGCAT  
TTTTTTTGGCAGTTTTTTGGATGTTAAATACTATCGGATGGGTTACTTTTTATTGGCATTGGAAGCATATCACATTATGG  
CAGGGTAACGTTTTTCGAGTTTAAATGAATCTTCCACTTATTTGATGGGATGGTTAAGAGATTATTTATGGTTAAACTCTTC  
ACAACCTATCAATGGATATAATCCTTTTGGTATGAATAGTTTATCGGTCTGGGCGTGGATGTTCTTATTTGGACATCTTG  
TTTGGGCTACTGGATTTATGTTCTTAAATTTCTGGCGTGGCTATTGGCAAGAATTGATTGAAACTTTAGCATGGGCTCAT  
GAACGCACACCTTTGGCCAATTTGATTGCTTGGAGAGATAAACCGGTGGCCCTTTCCATTGTGCAAGCAGCATTGGTTGG  
ATTAGCCCACTTTTCTGTAGGTTATATATTTCACTTATGCGGCTTTCTTGATTGCCTCTACATCAGGCAAATTTGGT---  
ATGTCACATTCAGTAAAGATTTATGATACATGTATAGGATGTACTCAATGTGTCCGAGCCTGCCCCACCGATGTATTAGA  
AATGATACCTTGGGACGGATGTAAAGCTAAACAAATGCTTCTGCTCCACGAACAGAGGACTGTGTCCGGTTGTAAGAGAT  
GTGAATCCGCCTGTCCAACCGATTTCTTGAGTGTTCGAGTTTCTTTATGGCATGAAACAACCTCGCAGCATGGGTCTAGGT  
TAT---ATGACAACTTTTGAC---  
TTTTCCCTCTGTGTTGGTGCCTTTAGTAGGCCTAGTATTTCCGGCAATGGCAATGGCTTCTTTATCTCTTCATGTTCAAAA  
GAATAAGACTGTT---ATGCGAGATCTAAAAACATATCTCTCC---  
GTGGCACCGGTATTAAGTACTCTATGGTTCGGGTCTTTAGCAGGTCTATTGATAGAGATTAATCGTTTTTTCCAGATGC  
GTTGACATTTCCCTTTTTTT-----  
ATGACTGCAATTTTAGAGAGACGCGAAAGCGAAAGCCTATGGGGTTCGCTTCTGTAACGGATAACCAGCACCAGAAACCG  
TCTTTACATTGGATGGTTTTGGTGTTTTGGTATCCCTACCTTATTGACCGCAACTTCTGTATTTATTATCGCCTTCATTG  
CTGCTCCTCCAGTAGATATTGATGGTATTCGTGAACCTGTTTCCGGATCTCTACTTTATGGCAACAATATTATCTCTGGT  
GCCATTATTCCTACTTCTGCAGCTATAGGTTTGCACCTTTTACCCAATCTGGGAAGCGGCATCCGTTGACGAATGGTTATA  
CAACGGTGGTCTTTATGAATAATCGTTCTACACTTTTTACTTGGTGTAGCTTGTACATGGGTCTGTGAGTGGGAGCTTA  
GTTTCCGTCTGGGTATGCGACCTTGGATTGCTGTTGCATATTCAGCTCCTGTTGCAGCTGCTGCTGCTGTTTTCTTGATC  
TACCCAATCGGTCAAGGAAGTTTTTCTGATGGTATGCCTCTAGGAATCTCTGGTACTTTCAATTTTCATGATTGTATTCCA  
GGCTGAACACAACATCCTTATGCACCCATTTACATGTTAGGCGTAGCTGGTGTATTTCGGCGGCTCCCTATTTCAGTGCTA  
TGCATGGTTCCTTGGTAACTTCTAGTTTGTAGCAGGGAAACCACAGAAAATGAATCTGCTAATGAAGGTTACAGATTCCGG  
CAAGAGGAAGAAACTTATAATATCGTAGCCGCTCATGGTTATTTTGGTTCGATTGATCTTCCAATATGCTAGTTTCAACAA  
CTCTCGTTCTTTACATTTCTTCCCTAGCTGCTTGGCCTGTAGTAGGTATCTGGTTCACTGCTTTAGGTATTAGCACTATGG  
CTTTCAACCTAAATGGTTTTCAATTTCAACCAATCTGTAGTTGATAGTCAAGGCCGTGTAATTAATACTTGGGCTGATATC  
ATTAACCGTGCTAACCTTGGTATGGAAGTTATGCATGAACGTAATGCTCATAACTTCCCTCTAGACCTA---  
GCTGCTGTGCAAGCTCCATCTACAAATGGA---  
ATGGGTTTGCCTTGGTATCGTGTTCATACCGTTGTATTGAATGATCCCGGCCGTTGCTTTCTGTCCATATAATGCATAC  
AGCTCTAGTTGCTGGTTGGGCGGGTTCGATGGCTCTATATGAATTAGCAGTTTTTGTATCCCTCTGACCCTGTTCTTGATC  
CAATGTGGAGACAGGGTATGTTTCGTTATACCCTTCATGACTCGTTTAGGAATAACCAATTCATGGGGCGGTTGGAGTGT  
ACAGGAGGGGCTATACCGAATCCGGGTATTTGGAGTTACGAAGGTGTGGCCGGGACATATTGTGTTTTCTGGCTTGTG  
CTTCTTGGCAGCTATCTGGCATTGGGTTTTATTGGGATCTAGAAATTTTTTCTGATGAACGTACAGGAAAACCTTCTTTGG  
ATTTGCCCAAGATCTTTGGAATTCATTTATTTCTCGCAGGGGTGGCTTGGCTTTGGTTTTGGTGCATTTTCATGTAACAGGC  
TTGTATGGTCTGGAATATGGGTGTCTGATCCTTATGGACTAACGGGAAAAGTACAATCTGTAAATCCAGCGTGGGGTGT  
GGAAGGTTTTGATCCTTTTGTTCGGGAGGAATAGCCTCTCATCATATTGCAGCAGGGACATTGGGTATATTGGCCGGTC  
TATTCATCTTAGTGTCCGCCCGCCCAACGTCTATACAAAGGATTGCGTATGGGCAATATTGAAACCGTCTTTCCAGT  
AGTATCGCTGCTGCTTTTTTGCAGCTTTTGTGTTGCCGGAATATGTGGTATGGTTTCAGCAACTACCCCGATCGAATT  
ATTTGGGCTACTCGTTATCAATGGGATCAGGGTACTTCCAGCAAGAGATATATCGAAGAGTTAGTGTGGGCTAGCCG  
AAAATCAAAGTTTTATCAGAAGCTTGGTCTAAAATTCCTGAAAATTAGCTTTTTTATGATTACATCGGCAATAATCCGGCA

AAAGGGGGATTATTTCAGAGCGGGTTCAATGGATAACGGGGATGGAATAGCGGTTGGATGGTTAGGACATCCTATCTTTAG  
AGATAAAGAAGGGCGTGAACCTTTTTGTACGTCGTATGCCTACCTTTTTTGAACCTTTCCGGTCGTTTTGGTAGATGGCG  
ACGGAATTGTTAGAGCCGATGTTCCTTTTCGAAGGGCAGAATCGAAGTATAGTGTGCAACAAGTAGGTGTAACCTGTTGAG  
TTCTACGGCGGGCGAACTCAACGGAGTCAGTTATAGTGATCCTGCTACTGTGAAAAAATATGCTAGACGTGCTCAATTGGG  
TGAAATTTTTGAATTAGATCGTGCTACTTTGAAATCCGATGGTGTTTTTCGTAGCAGTCCGAGGGGTTGGTTTTACTTTTTG  
GACATGCTTCTTTTTGCTTTGCTTCTTTTTTTGGACATATTTGGCATGGTGTGCTAGAACCTTGTTTCAGAGATGTTTTTGT  
GGTATTGATCCAGATTTGGATGCTCAAGTAGAATTTGGAGCATTCCAAAA---  
CTGGGAGATCCAACACTACAAGAAGACAAGTA---GTC-----  
ATGAAAACCTTATATCCCTGAGGAGGTTCTACCCCGTGAAACGCTCTTTAATGGAACCTTAGCTTTAGCTGGTTCGTGA  
CCAAGAAACCACTGGTTTTCGCTTGGTGGGCCGGGAATGCCCGGCTTATCAATTTATCCGGTAAACTACTCGGGGCTCATG  
TAGCCCATGCCGATTAATTGTATTCTGGGCCGGAGGAATGAACCTATTTGAAGTGGCTCATTTTCGTACCAGAGAAGCCT  
ATGTATGAACAAGGATTAATTTTTACTTCCCCACCTAGCTAC  
Pelargonium GTCGCTATTCTGCATCC---  
AGGGGGGAATATGTTTCGCTGGAATAATTTCTTAGATGTATTACCGCATCCTCGGGGATTAGGCCCACTTTTTACAGGTCA  
GTGGAATCTTTATGCTCAAAACCCAGACTCAAATAGTCATTTTTTTGGTACCTCTCAAGGATCAGGAACCTGCCATTCTAA  
CCCTTCTTGGGGGATTCCATCCACAAACGCAAAGTTTTATGGCTGACTGATATTGCTCATCATCATTTAGCTATTGCTTTT  
CTTTTTCTTGTGTGCTGGTCAATGTATAGAATAACTTTGGGATTGGACACAGTATAAAAAGATCTTTTAGAAGCCCATAT  
TCCTCCGGGGGGCGATTAGGGCGCGGACATAAGGGTCTTTATGACACAATCAATAATTCAATTCATTTTCAATTAGGCC  
TTGCTCTAGCCTCTTTAGGGGTTATTACTTCCCTGGTAGCTCAACACATGTATTCTTTACCTGCTTATGCGTTCATCGCA  
CAAGACTTTACGACTCAAGCCGCCTTATATACCCATCACCAATATATCGCAGGATTCATCATGACAGGAGCTTTTGCTCA  
TGGAGCTATCTTTTTTATTAGAGATTACAATCCGGAACAGAATGAGGATAATGTCTTGGCAAGAATGTTAGACCATAAAG  
AAGCTATCATATCTCATTTAAGTTGGGTGAGCCTTTTTCTCGGGTTCATACTTTGGGACTTTATGTTTCATAATGATGTC  
ATGCTTGCTTTTGGGACTCCGGAGAAACAAATCTTGATCGAACCCATATTTGCCCAATGGATACAATCTGCTCATGGTAA  
AACTTCATACGGGTTTCGACGTACTTTTTATCTTCAACGAATAGCCCAGCATTCTATTGCTGGTTCGAAGCATATGGTTGCCCG  
GGTGGTTAAATGCTATTAATGAAAATAGTAATTCACTATTCTTAAAAATAGGGCCGGGAGACTTCTTGGTCCATCACGCT  
ATTGCTCTAGGTTTACATACAACTACATTGATCTTAGTAAAAGGTGCCTTAGATGCACGTGGTTCCAAGTTAATGCCAGA  
TAAAAGGATTTTGGGTATAGTTTTCTTGCATGGTCCAGGACGGGGTGGTACTTGTGATATTTCCGCTTGGGACGCT  
TTTTATTAGCAGTTTTCTGGATGTTAAATACCAATGGATGGGTACTTTTTACTGGCATTGGAAGCATATTACATTATGG  
CAGGTTAACGTTTTACAGTTTTAATGAATCTTCCACTTATTTGATGGGATGGTTAAGAGATTATCTATGGTTAAACTTTC  
GCAACTTATCAATGGGTATAACCCCTTTGGTATGAATAGTTTTATCCGTTTTGGGCGTGGATGTTCTTATTTGGACATCTTG  
TTTTGGGCTACCGGATTTATGTTCTTAATTTCTGGCGTGGATATTGGCAGGAATTAATTGAAACTTTAGCATGGGCTCAT  
GAACGCACGCTTTGGCCAATTTGATTTCGATGGAGAGATAAACAGTGGCTCTTTCTATTGTGCAAGCAAGATTGGTTGG  
ATTAGCCCACTTTCCGTAGGTTATATATTTCACTTATGCGGCTTTCTTGATTGCTTCTACATCGGGCAAATTCGGTTAAA  
TGTCACACTCAGTAAAAATTTATGATACATGTATAGGGTGTACTCAATGTGTTAGAGCTTGCCCCACGGATGTATTAGAA  
ATGATACCTTGGGACGGATGTAAAGCTAAGCAAATCGCTTACGCTCCAAGAACAGAGGATTGTGTGGGTGTAAGAGATG  
TGAATCCGCCTGTCCAACGGATTTCTTAAGTGTTCGGGTTTTATTTATGGCACGAAACAACCTCGAAGTATGGGTCTAGCTT  
ATTAATGACAACCTCAATAACTTACCCTCCATTTTAGTGACTTTAGTAGGCCTAGTATTTCCGGCATTGCAATGGCT  
TCTTTATTTCTTATGTTCAAAAAACAAGATTTTGTAGATGCGAGATCTAAAAACATACCTCTCC---  
GCGGCGCCGGTACTAAGTACTATATGGTTCGGGGCTTTAGCAGGTCTATTGATAGAGATTAATCGTTTTCTTTCCGGATGC  
GTTAACATTTCCCTTTTTTTTCACTTAGATGACTGCAATTTAGAGAGACCGGAAAGCGAAAGCCTATGGGGTCGTTTTCT  
GTAACCTGGATAACTAGCACCGAAAACCGTCTTTATATTGGCTGGTTTTGGTGTTTTTGATGATTCCTACCTTATTGACCGCA  
ACTTCCGTATTTATTATCGCCTTCATTGCTGCCCTCCGGTGGATATTGATGGTATTCGTGAACCTGTTTCTGGATCTCT  
ACTTTATGGAAACAATATTATCTCGGGTGCCATTATTCCTACTTCTGCAGCGATAGGTTTGCACCTTTACCCAATATGGG  
AAGCGGCGTCTGTTGACGAATGGTTATACAATGGCGGTCCGTATGAGTTAATTGTTCTACACTTCCCTACTTGGTGTAGCT  
TGTTACATGGGCCGCGAGTGGGAACCTAAGTTTTCGTCTGGGTATGCGACCTTGGATTGCTGTTGCATATTCAGCTCCTGT  
TGCAGCTGCTACCGCTGTTTTCTTGATCTATCCAATTTGGTCAAGGAAGTTTTCTGATGGTATGCCTCTAGGAATCTCTG  
GTACTTTCAACTTTCATGATTTGATTTCCAGGCCGAGCACAATATCCTTATGCACCCATTTACATGTTAGGCGTAGCTGGC  
GTATTCGGCGGCTCCCTATTTCAGTGCTATGCTATGGTTCCTTGGTAACTCTAGTTTTGATCAGGGAACCCACAGAAAACGA  
ATCCGCTAATGAAGGTTATAGATTCGGCCAAGAGGAAGAAACTTATAATATCGTGGCTGCTCATGGTTATTTTTGGCCGAC  
TGATCTTCCAATATGCTAGTTTTAAACAACCTCCGTTCTTTACATTTCTTCTTGGCTGCTTGGCCTGTAGTAGGTATCTGG  
TTTACCCTTTAGGTATCAGCACTATGGCTTTCAACCTAAACGGTTTTCAATTTCAACCAATCCGTAGTTGATAGTCAAGG  
TCGTGTAATTAATACCTGGGCTGATATTATTAACCGTGTAACTTGGTATGGAAGTTATGCATGAACGTAATGCTCATA  
ACTTCCCTCTAGACCTA---  
GCTGCTGTGCAAGCCCCATCTACAAATGGATAAATGGGTTTTGCCTTGGTATCGTGTTTCATACCGTTGTATTGAATGATCC  
CGGCCGTTTTGCTTTCTGTCCATATAATGCATACAGCGCTAGTTGCTGGTTGGGCCGGCTCGATGGCTTTATATGAATTGG  
CAGTTTTTGGACCCCTCTGATCCTGTTCTTGTATCCAATGTGGAGACAAGGTATGTTTGTATCCCTTTTCATGACTCGTTTTA  
GGAATAACCAATTTCTTGGGGTGGTTGGAGTATCACAGGAGGGACTATTACGAATTCGGGTATTTGGAGTTACGAAGGTGT

GGCCGGTGCACATATTGTGTTATCTGGCTTGTGCTTCTTGGCAGCTATCTGGCATTGGGTATATTGGGATCTAGAAATCT  
TTTCTGATGAACGTACGGGAAAACCTCTTTGGATTTGCCGAAGATCTTTGGAATTCATTTATTTCTCTCAGGGGTGGCT  
TGCTTTGGTTTTGGTGCATTTTCATGTAACAGGATTGTACGGTCTGGGATATGGGTGTCCGATCCTTACGGATTAACCGG  
AAGGGTACAATCCGTAATCCAGCGTGGGGTGTGGGCGGTTTTGATCCCTTTGTTCCGGGAGGAATAGCTTCTCATCATA  
TTGCAGCGGGGACATTGGGCATATTGGCGGGCCTCTTCCATCTTAGTGTCCGTCCGCCCCAGCGTTTTATACAAAGGATTA  
CGTATGGGCAATATTGAAACCGTCCTTTCCAGTAGTATTGCTGCTGTCTTTTTTGCAGCTTTTTGTTGTTGCTGGAACAT  
GTGGTATGGTTCAGCAACTACCCCAATCGAATTGTTTGGCCCCACTCGTTATCAATGGGATCAGGGATATTTTCAGCAAG  
AAATATATCGAAGAATTGGTGTGGACTGGCCGAAAATCAAAGTTTATCAGAAGCTTGGTCTAAAATTCCTGAAAAATTA  
GCCTTTTATGATTATATTGGTAATAATCCGGCAAAGGGGGGGTTATTCCAGAGCCGGCTCAATGGACAATGGGGATGGGAT  
AGCTGTTGGATGGTTAGGACACCCTGTCTTTAGAGATAAAGAAGGGCGCGAACTTTTTGTACGTCGTATGCCTACTTTTT  
TTGAAACATTTCCGGTAGTTTTGGTTCGACGGAGACGGAATCGTTAGGGCTGATGTTCTTTTTAGAAAGGCGAGAATCCAAG  
TATAGTGTCAACAAGTAGGTGTAACCTGTTGAGTTCTATGGCGGCGAATAAATGGAGTTAGTTATAGTATCCTGCTAC  
TGTTAAAAAATATGCTAGACGCGCTCAATTAGGTGAAATTTTTGAGTTAGATCGTGTGCGTTAAAAATCCGATGGTGT  
TTCGTAGCAGCCCAAGGGGTTGGTTACTTTTTGGGCATGTTTCATTTGCTCTTCTTCTTCTTCCGGACACATTTGGCAT  
GGTGTAGAACTTTGTTCCAGAGACGTTTTTGGTGGTATTGATCCGGATTTGGATGCGCAAGTCGAATTTGGGGCATTCCA  
AAAA---CTGGGGGATCCAACCTACAAAAAGACAAGCA---GTCTGA---  
ATGAAAACCTTATATTCCCTGAGGAGGTTCTACCCCGTGGAAACGCTCTTTAATGGAACCTTTAGCTTTAGCCGGCCGTGA  
TCAAGAAACTACCGGTTTTCGCTTGGTGGGCCGGAAATGCCCGACTTATTAATTTATCCGGCAAACCTGCTGGGGGCTCATG  
TAGCCCATGCGGGCTTAATCGTATTCTGGGCCGGAGCAATGAACCTATTTGAAGTGGCTCATTTTCGTACCAGAGAAGCT  
ATGTATGAACAAGGATTCATTTTACTTCCCACTTAGCTAC  
Phalaenopsis GTCGCTATTCCCGGATCG---  
AGGGGAGAGTACGTCAGATGGAATAATTTCTTAGAAGTATTACCGTATCCCCAAGGGTTGGGCCCCCTTTTTATGGGTCA  
ATGGAATCTTTATGCTCAAAACCCCTGATTCCAGTAATCATTTATTTGGTACCTCCAAGGGGCAGGAACTGCCATTCTAA  
CCCTTCTTGGGGGATTTTCATCCCCAAACGCAAAGTTTATGGCTAACCGATATTGCTCATCATCATTTAGCTATTGCATTC  
CTTTTTCTCGTTGCTGGTCAATATGTATAGAATAACTTCGGTATTGGGCACAGTATCAAAGATCTTTTAGAAGCACATAT  
TCCCCCGGGGGTTCGATTAGGACGTGGACATAAAGGTCTTTATGACACAATAAATAATTCGCTTCATTTTCAATTGGGCC  
TTGCTCTAGCCTCTTTAGGGGTTACTTCTTTAGTAGCTCAACACATGTATTCTTTACCTGCTTATGCATTCATAGCA  
CAAGACTTTACTACTCAAGCTGCATTATATACTCATCACCATAACATCGCAGGGTTTCATCATGACAGGAGCCTTTGCTCA  
TGGGGCTATATTTCTTCAATTAGGATTAACAATCCGGAACAGAATGAGGATAATGTATTGGCAAGAATGTTAGACCATAAAG  
AAGCTATAACATCTCATTTAAGTTGGGCCAGCCTTTTTCTGGGGTTCCATACTTTGGGCCTTTATGTTTATAATGACGTC  
ATGCTTGCTTTTTGGTACTCCGGAAAAACAATCTTAATCGAACCCATATTTGCCCAATGGATACAATCTGCTCATGGCAA  
GACTTCGTATGGGTTTCGATGTACTCTTATCTTCAACGAATAGCCCGGCATTCAATGCAGGTGCAAGCATATGGTTACCTG  
GCTGGTTGAATGCTATTAATGAGAATAGTAATTCACTTTTTCTTAACAATAGGGCCGGGAGATTTCTTGGTTCATCATGCT  
ATTGCTCTGGGTTTACATACGACTACATTGATTTTAGTAAAAGGTGCTTTAGATGCGCGTGGTTCCAAGTTAATGCCAGA  
TAAAAGGATTTTGGTTATAGTTTTCTTGGCAGCGCCCCGGTCTGGTGGTACTTGTGATATTTCTGCTTGGGACGCAT  
TTTTTTGGCAGTTTTCTGGATGCTAAATACCATCGGATGGGTTACTTTTTATTGGCATTGGAAACACATCACATTATGG  
CAGGGTAATGTTTACAATTTAATGAATCCTCTACTTATTTGATGGGATGGTTAAGAGATTATCTATGGTTAAACTCTTC  
ACAACCTATCAATGGATATAACCCTTTTTGGTATGAATAGTTTATCGGTCTGGGCGTGGATGTTCTTATTTGGACATCTTG  
TTTGGGCTACTGGATTTATGTTCTTAATTTCTGGCGTGGCTATTGGCAGGAATTGATTGAAACTTTAGCGTGGGCTCAT  
GAACGGACACCTTTGGCTAATTTGATTGATGGAAGATAAGCCAGTGGCTCTTTCCATTGTGCAAGCAAGATTGGTTGG  
ATTAGTCCACTTTCCGTAGGTTATATATTCACTTACGCAGCTTTCTTGATTGCCTCCACATCAGGAAAATTTGGT---  
ATGTCACATTACAGTAAAGATTTATGATACATGTATAGGATGTACCCAATGTGTTTCGAGCTTGCCCCACGGATGTATTGGA  
AATGATACCTTGGGACGGATGTAAAGCTAAGCAAATGCTTCTGCGCCAAGAACCAGGATTGTGTAGGTTGTAAAAGAT  
GTGAATCCGCTTGTTCAACGGATTTTTTGGAGTGTCCGTGTTATTTATGGCATGAAACAACCTCGCAGCATGGGTCTTTCT  
TAT---ATGATAGATTTGAAC---  
TTTCCCTCTATTTTGTTCCTTTAGTGGGCCTAGTCTTTCCGGCAATCGCAATGGCTTCTTTATCTCTTTATGTCCAAG  
AAATAAGATTGTC---ATGCAAGATATAAAAAACATATCTCTCA---  
ACGGCACCTGTGTTAACCCTTTATGGTTTGGGTCTTTAGCAGGTCTATTGATAGAAATTAATCGTTTATTTCCAGATGC  
CTTGTCATTTCCCTTTTTTTTCATCC---  
ATGACTGCAATTTTAGAGAGACGCGAAAGTACAAGCCTATGGGGTTCGCTTCTGCAACTGGATTACCAGTACTGAAAACCG  
TCTTTACATCGGATGGTTTTGGTGTTTTGTATGATCCCTACTTTATTGACCAGCAACTTCTGTTTTTATCATTGCCTTCATTG  
CTGCCCTCCAGTCGATATTGATGGTATTCGTGAACCTGTTTCTGGGTCTCTACTTTATGGAAACAATATTATCTCTGGT  
GCCATTATTCCTACTTCCGCAGCTATAGGTTTGCATTTTTACCCAATATGGGAAGCAGCATCTGTTGATGAGTGGTTATA  
CAATGGCGGTCTTTATGAACCTATTGTTCTACACTTTTTACTTGGTGTAGCTTGTACATGGGTGCTGAGTGGGAACCTTA  
GTTTCCGTCTGGGTATGCGCCCTTGGATTGCTGTTGCATATTACAGCTCCTGTTGCGGCTGCTACAGCTGTTTTCTTGATC  
TACCCTATTGGTCAAGGAAGTTTTTCTGATGGTATGCCTTTAGGAATATCTGGTACTTTCAACTTCATGATTGCTTTCCA  
GGCAGAGCACAACTTCTTATGCATCCATTTACATGTTAGGCGTAGCTGGTGTATTTCGGCGGTTCCCTATTACAGTGCTA

TGCATGGTTCTTTGGTAACTTCTAGTTTAATCAGGGAAACCCTGAAAATGAGTCTGCTAATGAAGGTTACAGATTTGGT  
CAAGAGGAAGAAACCTATAATATTGTAGCCGCTCATGGTTATTTTGGCCGATTGATCTTCCAATATGCTAGTTTCAACAA  
TTCCCCTTCTTGCATTTCTTCTTGGCTGCTTGGCCTGTAGTGGGTATCTGGTTCACTGCTTTGGGTATTAGTACTATGG  
CGTTCAACTTGAACGGTTTTAATTTTAAACCAATCCGTAGTTGATAGTCAAGGTCGTGTTATTAACACTTTGGGCTGATATC  
ATAAATCGTGCTAATCTTGGTATGGAAGTAATGCATGAACGTAATGCACACAACCTTCCCTCTAGATCTA---  
GCTTCTGTAGAAGCTCCTTCAATAAATGGA---

ATGGGTTTGCCTTGGTATCGTGTTCACACTGTTGTATTGAATGATCCCGGTCGATTACTTTCTGTCCATATAATGCATAC  
AGCTCTGGTTTCTGGTTGGGCCGGTTCGATGGCTCTATACGAATTAGCCGGTTTTTGTATCCCTCTGACCCTGTTCTTGATC  
CAATGTGGAGACAAGGCATGTTTCGTTATACCCCTTCATGACTCGTTTAGGAATAACCAATTCATGGGGGGGTTGGAGTATC  
TCGGGAGGAACATAACGAATCCGGGCATTTGGAGTTATGAAGGCGTGGCAGGGGCACATATTTGTTTTCTGGCTTTGTG  
CTTCTTGGCAGCTATCTGGCATTGGGTGTATTGGGACCTAGAAAATATTTCTGTGATGAACGTACGGGAAAACCTTCTTTGG  
ATTTGCCCAAGATTTTTGGAATTCATTTATTCCTCTCAGGAATCGCTTTGGCTTTGGCTTTGGTGCATTTTCATGTAACAGGC  
TTATATGGTCCCTGGAATATGGGTGTGAGATCCTTATGGACTAACTGGCAAAGTACAATCTGTAAATCCAGCATGGGGTGC  
GGAAGGTTTTGATCCTTTTGTTCGGGGGGAATAGCTTCTCATCATATTGCAGCAGGTACATTGGGCATATTAGCGGGTCT  
TATTCATCTTAGTGTCCGTCGCTCAACGTCTATACAAAGGATTACGCATGGGTAATATTGAAACTGTCCTTTCCAGT  
AGTATTGCTGCTGTTTTTTTTTGCAGCTTTCGTTGTTGCTGGAACATATGTGGTATGGTTCAGCAACTACCCCAATCGAATT  
ATTTGGCCCCACTCGTTATCAGTGGGATCAGGGTACTTCCAACAAGAAATCTATCGAAGAGTTGGGGCTGGACTAGCCG  
AAAATCTGAGCTTATCGGAAGCTTGGTCTAAAATTTCCCGAAAAATTAGCTTTTTATGATTACATTGGTAATAATCCGGCG  
AAAGGAGGATTATTCAGAGCAGGCTCAATGGATAACGGAGATGGAATAGCTGTTGGGTGGTTAGGGCACCCCATATTTAG  
AGATAAAGAAGGGCACGAACCTTTGTACGTCGTATGCCTACCTTTTTTGAACATTTCCAGTAGTTTTGGTAGATGCAG  
ACGGAATTTGTGAGGGCTGATGTTCTTTTAGAAGGGCAGAATCCAAGTATAGTGTGAACAAGTAGGGGTAACCTGTTGAA  
TTTTATGGTGGCGAGCTCAATGGGGTCATTTATAGTGATCCTGCTACTGTGAAAAAATATGCTAGACGTGCCCAATTGGG  
TGAAATTTTTGAATTAGACCGGGCTACTTTGAAATCCGATGGTGTTTTTTCGTAGCAGTCCAAGGGGTTGGTTCACTTTTG  
GGCATGCTACGTTTCGCTTTGCTCTTTTTCGGACATATTTGGCACGGCGCCAGAACCTTGTTCAGAGATGTTTTTGC  
GGTATTGATCCAGATTTGGATGCTCAAGTGAATTTGGAGCTTTTTCAAAA---

CTTGGAGATCCAACACTACAAGGAGACAGGTA---GTC-----  
ATGAAAACCTTATATCCCTGAGGAGGTTCTACCCCGTGGAAACGCTCTTTAATGGAACCTTAGCCTTAGTCGGTCTGTGA  
CCAAGAAACCACCGGTTTCGCTTGGTGGGCCGGGAATGCGAGACTTATCAATTTGTCCGGTAAACTGCTTGGGGCTCACG  
TAGTCTATGCCGGATTAATTTGATTTCTGGCCGGAGCAATGAACCTATTTGAAGTGGCTCATTTTCGTACCAGAGAAGCCC  
ATGTATGAACAAGGATTGATTTTACTTCCACACTTAGCTAC

Pinus                   GTCGCTATTCTGAATCA---  
AGGGGAGTGCACGTCAGATGGGATAATTTTTTGGATGTATTACCGCATCCCGAAGGTTTAGAACCCTTTTTCACAGGTCA  
GTGGAATCTCTATGCTCAAAATCCTGATTCTAGTAGTCACTTATTCGGTACCTCCCAAGGGGCGGGAACCTGCTATTCTAA  
CTTTTCTCGGAGGATTCCATCCACAAACTCAAAGTTTATGGCTGACTGATATGGCTCATCATCATTTAGCTATTGCACTT  
GTTTTTTCAATTGCTGGTCAATATGTATAGAACCAACTTTGGGATTGGTACAGTATGGAAGATATTTTGGAGGCACATGT  
TCCTCCAGGAGGCTTATTAGGACGCGGACATAAGGGTCTTTATAACACAATCAATAATTTCTTTCATTTTCAATTGGGTC  
TTGCTTTAGCTTCTTTGGGGGTTATAACTTCCTTGGTAGCTCAACACATGTATTCTTTACCCCTTATGCATTTCATAGCA  
CAAGACTTCACCACCAAGCTGCATTATATACTCATCATCAATACATTGCCGGTTTATTATGACAGGAGCCTTTGCTCA  
TGGAGCTATATTCCTCATTAGGGATTATAATCCGGAACAGAATAAGGATAATGTATTGGCGAGAATGTTGGAGCAGAAAG  
AAGCTATAATATCTCATCTTAGTTGGGTTAGTTTATTACTAGGTTTCCATACCTTGGGACTTTATGTCCATAATGATGTT  
ATGCTTGGTTTTCGGTAATCCAGAAAAACAAATCTTGATCGAGCCCATATTTGCTCAGTGGATACAATCTGCTCATGGTAA  
GACGTTATATGGTTTTCGATATACTCCTATCTTCAACAAGTGGTCCATCATTTCGATGCAGGTAAGAGCATATGGTTACCCG  
GTTGGTTAAATGCTATTAATGATAATAATAATTCATTGTTCTCAACAATTGGTCCCTGGGAGACTTTTTGGTTCATCATGCT  
ATTGCTCTAGGTTTGCATACAACCTACATTGATCCTAGTTAAAGGTGCTTTGGATGCGCGTGGTTCCAGGTTAATGCCAGA  
TAAAAAAGATTTTGGTTATAGTTTTCTTTCGATGGTCCGGGACGGGGTGGTACTTGCATATCTCGGCCTGGGATGCTT  
TTTATTTAGCAGTTTTCTGGATGTTGAATACTATTGGATGGGTTACTTTCTATTGGCATTGGAAGCATATAACATTATGG  
CAGGTAATGTAGCACAAATTTAATGAGTCTTCCACTTATTTAATGGGATGGTCAAGAGATTATCTATGGTTAAATTTCTTC  
ACAACCTATTAATGGATAACAATCCTTTTGGTATGAACAGTTTATCTGTTTGGGCGTGGATGTTCTTATTTCGGGCATCTTG  
TTTTGGGCTACTGGATTTATGTTTCTTATTTTCTGGCGTGGATATTGGCAGGAACTGATCGAAACTCTTGCATGGGCCAT  
GAACGCACGCCTTTAGCTAATTTAGTTCGATGGAGAGACAAGCCAGTAGCCCTTTCCATTGTTCAAGCACGATTAGTTGG  
ATTAGCTCACTTTTCCGTAGGTTATATATTTCACTTATGCAGCTTTTTTAAATGCTCTACATCAGGTAATTTGGT---

ATGGCACATTCCGTCAAAATTTATGATACATGTATTGGTTGTACCCAATGCGTACGAGCTTGTCCACAGATGTATTGGA  
AATGATACCTTGGGAAGGATGTAAAGCTAAGCAAATGCTTCTGCTCCAAGAACAGAAGACTGCGCAGGTTGTAAGCGGT  
GTGAATCCGCTTGTCCAACAGATTTCTTGAGTGTACGTGTTTATTTATGGCATGAGACAACGCGCAGTATGGGTCTAGCT  
TAC-----  
CTACCCTCTATTTTGGTGCCTTTAGTCCGGCTTATTACTTCCGGCAATTACAATGGTTCTTTTCTCATCTGTATATTCAGAA  
GGACGAGATTTTA---ATGCAAGATCTAAAGACCTATCTTTCC---

ACAGCGCCTGTGTTAGCTATTTTTATGCGTCAGTTTTTTAGCCGCCCTATTGATAGAAATCAATCGTTTTTTTTCCAGATGC  
TCTTTTTCTTTCTCTTTCTTTTTCT---

ATGACCGCAATTATAGAAAGACGCGAAAGCGCAAATTTATGGAGTCGCTTCTGCGACTGGATCACTAGCACTGAAAACCG  
TCTTTACATTGGATGGTTTCGGCGTCTTGATGATCCCTACCCTATTGACCGCAACCTCTGTATTCAATTATTGCTTTTCATCG  
CAGCTCCTCCAGTAGATATTGATGGTATTCGTGAACCTGTTTCTGGTTCTCTTCTTTATGGAAACAATATTATCTCCGGT  
GCCATTATTCTACCTCTGCAGCTATCGGTTTGCACCTTCTATCCCATCTGGGAAGCAGCTTCCGTCGATGAATGGCTATA  
CAACGGGGGTCCTTACGAGCTAATCGTTCTACACTTCTACTTGGTGTAGCTTGTCTATATGGGTCTGTGAGTGGGAGCTTA  
GCTTCCGTCTAGGTATGCGTCCTTGGATTGCTGTTGCATACTCAGCTCCTGTTGCAGCTGCTACTGCCGTTTTCTTGATC  
TACCCTATTGGTCAAGGAAGCTTCTCTGACGGTATGCCTCTAGGAATCTCTGGTACTTTCAATTTTCATGATTGTATTCCA  
GGCTGAGCACAATATCTTTATGCATCCATTCCACATGTTGGGTGTAGCTGGCGTATTTCGGCGGCTCTCTATTTCAGTGTCA  
TGCATGGTTCTTTGGTAACTTCCAGTTTGTATCAGGAAACTACTGAGAATCAGTCCGCAAATGCAGGTTACAATTTGGT  
CAGGAGGAAGAAACCTACAATATTGTGGCTGCTCACGGTTATTTTCGGCCGATTGATCTTCCAATATGCTAGTTTCAACAA  
CTCCCCTTTCTTTACATTTCTTCTTAGCTGCTTGGCCCGTAGCAGGTATCTGGTTTACCCTCTAGGCATAAGCACTATGG  
CTTTCAACCTAAATGGATTCAATTTCAACCAATCTGTAGTTGACAGTCAAGGCCGTGTAATTAACACTTGGGCTGATATC  
ATTAATCGTGCTAACCTAGGTATGGAAGTTATGCACGAACGTAATGCTCACAACTTTCTCTGGATCTA---

GCCGCTGTTGAATCTATTTCAATAGGTGGA---  
ATGGGTTTGCCTTGGTATCGCGTTCATACCGTTCGATTGAATGATCCTGGACGGTTAATTTCTGTACATATAATGCATAC  
AGCTCTAGTTGCTGGTTGGGCTGGTTCAATGACTCTGTACGAATTAGCAGTTTTTGTATCCATCCGATCCTGTTCTTGATC  
CAATGTGGAGACAAGGTATGTTTCGTTATACCTTTTTATGACTCGTTTGGGAATAAAGGATTTCATGGAGTGGATGGAACATC  
ACCGGAGAAACTGTAATTAATCCCGGTATTTGGAGTTATGAAGGTGTGGCCGTGGCACATATCGTGTCTTCTGGCCTGTG  
CTTTTTGGCAGCTATCTGGCATTGGGTATATTGGGATCTGGACATATTCTGTGATGAACGTACGGGAAAACGTTGTTTAG  
ATTTGCCAAAAGTATTTGGAATTCATTTATTCCTCTCAGGAGTAGCTTGTTCGGATTTGGAGCATTTTCATGTAACGGGT  
TTGTATGGTCTGGGATATGGGTGTCTGATCCTTATGGACTAACTGGAAAAATACAACCAGTGGATCCAGCATGGGGAGC  
TGAAGGTTTTGATCCTTTTTGTTCCAGGAGGAATAGCTTCTCATCATATAGCAGCGGGTATTTTGGGTATATTAGCAGGTC  
TATTCATCTCAGTGTTCGTCCTCCCAACGTTTATACGTAGGATTACGCATGGGGAATATTGAAACGGTCTATCCAGC  
AGTATTGCTGCTGTGTTTTTGCAGCTTTCATTGTTGCTGGGACCATGTGGTATGGCTCCGCAACTACTCCGGTCCGAAAT  
ATTCGGTCCCCTCGTTACCAGTGGGATCAGGGATACTTCCAACAAGAAATAGATCGACGGGTTTCGTGCCGGTCTGGCCG  
AAAATTTAAGCCTATCAGAAGCTTGGTCCAAAATTTCCCGAGAAACTCGCTTTTTATGATTACATTTGGTAATAATCCAGCT  
AAGGGGGGTTTATTCAGAGCAGGTGCAATGGACAATGGAGATGGAATAGCTGTTGGTTGGTTAGGACACCCCTATCTTCAA  
AGATAAAGGAGGAAATGAGCTTTTTGTACGTGCTATGCCTACCTTTTTCGAAACATTTCCAGTAGTTCTGGTGGACAAG  
AAGGAATTTGTAAGCCGATGTTCTTTTTAGGAGGGCAGAATCAAAGTATAGTGTGAACAAGTAGGTGTAAGTGTGAG  
TTCTATGGTGGTGGACTTGACAGGGTCAGTTTTGGTGATCCTGCTATAGTTAAAAAATACGCTAGACGTGCTCAATTAGG  
TGAAATTTTTGAATTAGATCGTGCTACTCTAAAATCTGATGGTGTTTTTCGTAGTAGTCCAAGGGGTTGGTTTTACTTTTG  
GACATGCTACATTTGCTCTCCTTTTTCTTTCTGGACACATTTGGCATGGTGTAGGACCTTATTCAGAGATGTTTTGCT  
GGTATCGACTCGGATCTGGATGATCGAATAGAATTTGGAGCATTCCAAAAA---  
CTGGGAGATCCAATACTACTAAAAGACAAGTG---GTA-----

ATGAAAACCTTATATCCCTGAGGAGGTCTACCCCGTGAAACGCTCTTTAATGGAACATAGCTTTAGCTGGTCTGTA  
TCAAGAAACCACTGGTTTTGCTTGGTGGGCGGTAATGCCCGACTTATCAATTTGTCGGGTAATTTGCTTGGGGCTCACG  
TGGCTCATGCCGATTAATTGATTTCTGGGCCGGAGCAATGAACCTATTTCGAAGTGGCTCATTTTCGTACCGGAAAAACCT  
ATGTATGAACAAGGATTGATTCTGCTTCCCCATCTAGCTAC

Piper GTCGCCATCCCTGGATCG---

AGAGGGGAGTACGTCCGATGGAATAATTTCTTAGATGTATTACCGTATCCCCAAGGGTTGACCCCACTTTTTACAGGCCA  
GTGGAATCTTTATGCCCAGAACCCTGATTCTGGTAGTCATTTATTTGGTACCTCCCAAGGATCGGGAACTGCCATTCTAA  
CCCTTCTCGGAGGATTCCATCCACAAACGCAAAGTTTATGGTTGACCGATATTGCTCATCATCATTTAGCTATTGCATTT  
ATTTTTCTCGTAGCCGGTCAATATGTATAGAATAACTTCGGAATTGGGCACAGTATGAAAGATCTTTTAGAGGCACATAC  
TCCTCCAGGGGGTTCGATTGGGACGTGGGCATAAGGGTCTTTATGACACAATCAATAATTCGCTTCATTTTCAATTAGGTC  
TTGCTTAGCCCTCTTTAGGGGTTATTACCTCCTTGGTAGCTCAACACATGTATTCTTTGCCCGCTTATGCATTCATAGCA  
CAAGACTTTACTAGCCAAGCTGCGTTATATACTCATCACCAGTATATCGCAGGGTTTATCATGACAGGAGCCTTTGCTCA  
TGGAGCTATATTCTTTCATTTCGGGATTACAATCCGGAACAGAATGAGGATAATGTATTGGCAAGAATGTTAGACCATAAAG  
AAGCTATCATATCTCATTTAAGTTGGGCTAGCCTATTTTTGGGATTCCATACCTTAGGACTTTACGTTTATAACGACGTC  
ATGCTCGCTTTTGGTACTCCGGAGAAACAAATTTTTGATTGAGCCCATATTTGCCCAATGGATACAATCTGCTCATGGTAA  
GACTTCATATGGGTTTCGATATACTCTTATCTTCAACGAATGGTCCGGCATTTAATGCTGGTGTAGAGCATATGGTTACCGG  
GCTGGTTGAGTGGCCTTAATGATAATAGTAATTCATATTCTTAAACAATAGGCCCGGAGACTTCTTGGTTTCATCATGCT  
ATTGCTCTAGGCTTGACATACTACATTTGATTTTTAGTAAAGGGTGTCTTTAGATGCGCGCGGCTCCAAGTTAATGCCAGA  
TAAAAAGGATTTTTGGTTATAGTTTTCTTTCGACGGGCGGGGCGAGGCGGTACTTGTGATATTTCCGCTTGGGACGCAT  
TTTTATTTGGCAGTTTTCTGGATGTTAAATACCATTGGATGGGTCACTTTTTATTGGCATTGGAAGCACATCACATTATGG  
CAGGGTAATGTTTTACAATTTAATGAATCCTCCACTTATTTGATGGGATGGTTAAGAGATTATTTATGGTTAAACTCTTC



ACAAC TTATCAATGGATATAACCCTTTTGGTATGAATAGTTTATCGGTCTGGGCATGGATGTTCTATTTGGTCATCTTG  
TTTGGGCTACTGGATTTATGTTCTTAATTTTCTGGCGTGGATATTGGCAGGAATTGATTGAAACTTTAGCATGGGCTCAT  
GAGCGTACACCTTTAGCCAATTTGATTGATGGAGGGATAAACCTGTAGCTCTTTCCATTGTGCAAGCAAGTTGGTTGG  
ATTAGCCATTTTTCGGTAGGTTATATATTACCTATGCAGCTTTCTTGATTGCTTCTACATCAGGCAAATTTGGT---  
ATGTCGCATT CAGTAAAAATTTATGATACATGTATAGGATGTACTCAATGTGTACGAGCCTGCCCCACGGACGTGTTGGA  
AATGATACCTTTGGGACGGATGTAAAGCTAAGCAAATAGCTTCGGCTCCAAGAACAGAGGACTGTGTAGGTTGTAAAAGAT  
GCGAATCCGCCTGTCCAACGGATTTTTTGAGTGTTCGAGTTTATTTATGGCATGAAACAACCTCGCAGCATGGGTCTAGCT  
TAT---ATGACAGATTT CAGT---  
TTACCCTCTATTTTGGTGCCTTTAGTAGGCCTAGTATTGCCGGCAATTGCAATGGCGTCTTTATCTCTTCATGTTCAAAA  
AAACAAAATTGTT---ATGCGAGATATAAAAAACATATCTCTCC---  
GTGGCACCCGTTGTTAGCTACTTTATGGTTTCGGTTCTTTAGCAGGTCTATTGATAGAGATCAATCGTTTATTCCCGGATGC  
GTTGGTATTCCCCTTTTTTTCATTC---  
ATGACTGCAATTTT TAGAGAGACGCGAAAGCACAAGCCTGTGGGGCCGCTTCTGTAAC TGGATTACTAGCACTGAAAACCG  
TCTTTATATTGGATGGTTTGGTGTTTTGTATGATCCCTACTTTATTGACCGCAACTTCTGTATTTATTATCGCCTTCATTG  
CTGCTCCTCCAGTGGATATTGATGGTATTCGTGAACCTGTTTCCGGTTCCTACTTTATGGAAACAATATTATCTCTGGC  
GCTATTATTCTACTTCTGCGGCTATCGGTTTGCATTTTTACCCGATCTGGGAAGCTGCATCGGTTGATGAATGGCTATA  
CAATGGTGGTCTTTATGAGCTAATTGTTCTACACTTCTTGCTTGGTGTAGCTTGTACATGGGTGCTGAATGGGAACCTTA  
GTTTCCGCTCTGGGTATGCGCCCTTGGATTGCTGTTGCATATTCAGCTCCTGTTGCAGCTGCTACTGCTGTTTTCTTGATC  
TACCCTATTGGTCAAGGAAGCTTCTCTGATGGTATGCCTTTAGGAATTTCTGGTACTTTCAATTTTCATGATTGATTCCA  
GGCTGAGCACAACATCCTTATGCATCCATTTACATGCTAGGCGTAGCTGGTGTATTTCGGCGGCTCCCTATTCAGTGCTA  
TGCATGGTTCCCTTGGTAACCTCTAGTTTGTATCAGGGAAACCACAGAAAATGAATCTGCTAATGAAGGTTACAGATTCCGT  
CAAGAGGAAGAACTTATAATATCGTTGCTGCTCATGGTTATTTTGGCCGATTGATCTTCCAATATGCTAGTTTCAACAA  
TTCTCGCTCCTTACATTTCTTTTTAGCTGCTTGGCCTGTAGTAGGTTATTTGGTTCACTGCTTTAGGTATCAGCACCATGG  
CTTTCAACCTAAATGGATTCAACTTTAATCAATCCGTAGTTGACAGTCAAGGTGCTGTTATTAACACTTGGGCTGATATC  
ATTAACCGTGCAAACCTTGGTATGGAAGTTATGCATGAGCGTAATGCACACAACCTTCCCTCTAGACTTA---  
GCTGCTGTTGAAGCTCCATCTACAAATGGA---  
ATGGGTTTGCCTTGGTATCGTGTTCATACCGTTCGTATTGAATGATCCCGGCCGATTACTTTCTGTCCATATAATGCATAC  
AGCTCTAGTTTCTGGTTGGGCGGCTCGATGGTTTATACGAATTAGCGGTTTTTGTATCCCTCTGACCCTGTTCTTGATC  
CAATGTGGAGACAGGGTATGTTTTGTTATACCCTTCATGACTCGTTTAGGCATAACTAATTCATGGGGTGGTTGGAGTATT  
AACCAGGGGGACTATAACGAATCCGGGTATTTGGAGTTACGAAGGTGTAGCCGGAGCACATATTATGCTTTCCGGTTTTGTG  
CTTCTTAGCAGCTATCTGGCATTGGGTGTATTGGGACCTAGAAAATATTCCGCGACGAGCGTACGGGAAAACCTCCTTGG  
ATTTGCCCAAGATCTTTGGAATTCATTTATTTCTTGGCCGAGTGGCTTGCTTTGGGTTTGGAGCATTTTCATGTAACAGGC  
TTGTATGGTCTCGAATATGGGTGTCCGACCCTTACGGCTTAACCGGAAAAGTACAACCTGTAAACCCATCTTGGGGGGC  
AGAAGGTTTTGATCCTTTTTGTTCCAGGAGGAATAGCCTCTCATCATATTGCAGCGGGGACATTGGGTATATTAGCGGGCC  
TATTCCATCTTAGTGTTCGCCCCGCCCAACGTTTATACAAAGGATTACGTATGGGCAATATTGAAACTGTCCTTTCTAGT  
AGTATCGCTGCTGTCTTTTTTGCAGCTTTCGTAGTTGCTGGAACCTATGTGGTATGGTTTCAGCAACTACCCCAATTGAATT  
ATTTGGGCCCCTCGTTATCAGTGGGATCAGGGTACTTTTACGAAGAAATATATAGAAGAGTTAGCGCTGGGCTAGCCG  
AAAATCTGAGTTTATCAGAAGCTTGGTCTAAAATTTCCCGAAAATTTAGCTTTTTTACGATTACATTGGTAATAATCCGGCA  
AAGGGAGGATTATT CAGAGCAGGTTCAATGGACAACGGCGATGGAATAGCTGTTGGCTGTTTAGGACACCCCGTCTTTAG  
AGATAAAGAAGGTCATGAACTTTTTGTCCGTCGTATGCCTACCTTTTTTGAACATTTCCGGTAGTTTTGGTAGATGGAG  
ACGGAATTGTGCGAGCAGATGTTCTTTTAGAAGGGCGGAATCAAAGTATAGTGTGGAACAGGTAGGTGTAACCTGTTGAG  
TTCTATGGCGGTGAACTCAATGGAGTTAGTTATAGTGATCCTGCTACTGTGAAAAAATATGCTAGACGTGCTCAATTGGG  
GGAGATTTTTGAAATTGGATCGTGCTACTTTGAAATCAGATGGTGTTTTTTTCGCAGCAGTCCAAGGGGTTGGTTTTACTTTTG  
GACATGCTTCATTTGCTTTGCTCTTCTTTTTTTCGGCCACATTTGGCATGGCGCTAGAACCTTGTTCAGAGATGTTTTTGT  
GGTATTGATCCAGATTTGGATTCTCAAGTAGAGTTTGGAAACATTTCAAAAA---  
ATCGGAGACCCCAACCAAGGAGACAAGCA---GTC-----  
ATGAAAACCTTGTATTTCCCTGAGGAGGTTCTACCCCGTGGAACCGCTCTTTAATGGAAC TTTAGCTTTAACCGGTCGTGA  
CCAAGAACTACTGGTTTTCGCTTGGTGGGCTGGTAATGCCCGACTTATCAATTTATCCGGTAAACTACTTGGGGCTCAGG  
TAGCCCATGCTGGATTAATCGTATTCTGGGCCGGAGCAATGAACCTATTTGAAGTGGCTCATTTTCGTACCAGAGAAACCC  
ATGTATGAACAAGGATTAATTTTACTTCCACATCTAGCTAC  
Platanus           GTCGCTATTCCCGGATCC---  
AGGGGGGAGTACGTTTCGATGGAATAATTTCTTAGATGTATTACCGCATCCCCAAGGGTTAGGCCCGCTTTTTTACAGGTCA  
GTGGAATCTTTATGCCCAAAACCCCGATTCCAGTAGTCATTTATTTGGTACCGCCAAGGAGCGGGGACTGCCATTCTAA  
CTCTTCTCGGGGATTTTCATCCACAAACGCAAAGTTTTATGGCTGACCGATATTGCACATCATCATTTAGCTATTGCATTG  
ATTTTTCTCGTTGCTGGTCATATGTATAGAATAACTTCCGGATTGGGCACAGTATGAAAGATCTTTTAGAAGCACATAC  
TCCTCCGGGGGGACGATTGGGACGTGGACATAAGGGTCTTTATGACACAATCAATAATTCGGTTTCAATTTAGGTC  
TTGCTCTAGCTTCTTTAGGGGTTATTACTTCTTGGTAGCTCAACACATGTACTCTTTACCTGCTTATGCATTTCATAGCA

CAAGACTTTACTACTCAAGCTGCCTTATATACTCATCATCAATACATCGCAGGATTTCATCATGACAGGAGCTTTTGTCTCA  
TGGAGCGATATTCTTCATTAGAGATTACAATCCGGAGCAGAATAAGGATAATGTATTGGCAAGAATGTTAGACCATAAAG  
AAGCTATCATATCCCATTTAAGTTGGGCCAGCCTCTTTCTGGGGTTCCATACTTTGGGACTTTATGTTTCATAACGATGTC  
ATGCTCGCTTTTGGTACTCCGGAGAAACAAATCTTGATCGAACCCATCTTTGCCCAATGGATAACAATCTGCTCATGGTAA  
GACTTCATATGGGTTTCGATGTACTTTTATCTTCAACGAATAGCCCAGCATTCAACGCGGGTTCGAAGCATATGGTTGCCTG  
GCTGGTTAAATGCTGTTAATGAGAATAGTAATTCATTATTCTTAAACAATAGGTCCTGGGAGACTTCTTGGTTCATCATGCT  
ATTGCTCTAGGTTTACATACAACCTACATTGATCTTAGTAAAAGGTGCTTTAGATGCACGTGGTTCCAAGTTAATGCCAGA  
TAAAAAGGATTTCCGGCTATAGTTTCCCTTGCACGGTCCGGGACGAGGTGGTACTTGTGATATTTCCGGCTTGGGACGCAT  
TTTATTTGGCAGTTTTCTGGATGTTAAATACCATTGGATGGGTTACTTTTTATTGGCATTGGAAGCACATCACATTATGG  
CAGGGTAACGTTTTACAGTTTAAATGAATCCTCCACTTATTTGATGGGATGGTTAAGAGATTATCTATGGTTAAACTCTTC  
ACAACCTATCAATGGATATAACCCTTTTGGTATGAATAGTTTATCGGTCTGGGCGTGGATGTTCCCTATTTGGACATCTTG  
TTTGGGCTACTGGATTTATGTTCTTAATTTCTGGCGTGGATATTGGCAGGAATTGATTGAAACTTTAGCATGGGCTCAT  
GAACGCACACCTTTGGCTAATTTGATTTCGATGGAGAGATAAACCCAGTGGCTCTTTCCATTGTGCAAGCAAGATTGGTCGG  
ATTAGCCCACTTTTCTGTAGGGTATATATTCACTTATGCAGCTTTCTTGATTGCCTCTACATCAGGCAAATTTGGT---  
ATGTGCGATTACAGTAAAGATTTATGATACATGTATAGGGTGTACTCAATGTGTACGAGCCTGCCCCACAGATGTTTTAGA  
AATGATCCCTTGGGACGGATGTAAAGCTAAGCAAATTGCTTCTGCTCCAAGAACAGAGGATTGTGTAGGTTGTAAGAGAT  
GTGAATCCGCTGTCCAACGGATTTCTTGAGTGTTCGGGTTTATTTATGGCATGAAACAACCTCGCAGCATGGGTCTAGCT  
TAT---  
ATGATAGATCTCAACCTTTTTCCCGCTTTTTTGGTGCCTTTCTGTTGGGCATAGTATTGCCGGCAATTGCAATGGCCTCTTT  
ATTTATTTATATTGAAAGAAACGAGATTGTC---ATGCGAGATATAAAAACATATCTCTCC---  
GTGGCACCTGTGCTAAGTACTCTATGGTTCGGGGCTTTAGCAGGTCTATTGATAGAGATCAATCGTTTCTTTCCGGATGC  
GTTGACATTCCCTTTTTTTTTAA-----  
ATGACTGCAATTTTAGAGAGACGCGAAAGCGAAAGCCTATGGGGTTCGCTTCTGTAACCTGGATAACCAGCACCGAAAACCG  
TCTTTACATTGGATGGTTTGGTGTTTTGTATGATCCCTACCTTATTGACCGCAACTTCTGTATTTATTATCGCCTTCATTG  
CTGCCCCCTCCAGTGGATATTGATGGTATTCGTGAACCTGTTTCTGGGTCTCTACTTTACGGAAACAATATTATCTCTGGT  
GCCATTATTCCTACTTCTGCAGCTATAGGTTTGCACTTTTACCCGATATGGGAAGCGGCATCCGTTGATGAATGGTTATA  
CAATGGTGGTCTTATGAACTGATTGTTCTACACTTCTTACTTGGTGTAGCTTGTACATGGGTCTGAGTGGGAACTTA  
GTTTCCGTCTGGGTATGCGCCCTTGGATTGCTGTTGCATATTCAGCTCTGTTGCAGCTGCTACTGTTGTTTTCTTGATC  
TACCCAATTGGTCAAGGAAGCTTCTCTGATGGTATGCCTCTAGGAATCTCTGGTACTTTCAACTTCATGTTGATTGCCA  
AGCTGAGCACAACTCCTTATGCACCCATTTACATGTTAGGTGTAGCTGGTGTATTCCGGCGGCTCCCTATTGAGTGTGTA  
TGCATGGTTCCTTGGTAACTTCTAGTTTGTATCAGGGAAACCACTGAAAATGAATCTGCTAATGAAGGTTACAGATTCCGT  
CAAGAGGAAGAACTTATAATATCGTAGCTGCTCATGGTTATTTTGGCCGATTGATCTTCCAATACGCGAGTTTCAACAA  
CTCTCGTTCTTTACATTTCTTCCCTAGCTGCTTGGCCTGTAGTAGGTATCTGGTTCCTGCTTTAGGTATCAGCACCATGG  
CTTTCAACCTAAATGGTTTCAATTTCAACCAATCTGTAGTTGACAGTCAAGGTCTGTGTAATTAACACTTGGGCTGATATC  
ATCAACCGTGTAACTTGGTATGGAAGTTATGCATGAACGTAATGCTCACAACCTTCCCTCTAGATCTA---  
GCTGCTGTTGAAGCCCCATCTACAAATGGA---  
ATGGGTTTGCCTTGGTATCGTGTTCATACCGTTCGATTTGAATGATCCCGTTCGCTTCTGTTTCATATAATGCATAC  
AGCTCTAGTTTCTGGTGGGCCGGTTCGATGGCTCTATACGAATTAGCAGTTTTTGTATCCCTCTGATCCTGTTCTTGTGATC  
CAATGTGGAGACAGGGTATGTTTCTTATACCCTTCATGACTCGTTTAGGAATAACCAATTCATGGGGCGGTTGGAGTATC  
ACAGGAGGGACTATAACGAATCCGGGTATTTGGAGTTACGAAGGTGTGGCCGGGGCACATATTGTGTTTTCTGGCCTGTG  
CTTCTTGGCAGCTATCTGGCATTGGGTGTATTGGGATCTAGAAATATTCTGTGATGAGCGTACAGGAAAACCCCTCTTTGG  
ATTTGCCCAAGATCTTTGGAATCCATTTATTTCTCTCAGGGGTGGCTTGCTTCCGGTTTGGCGCATTTTCATGTAACAGGC  
TTGTATGGTCTTGGAAATATGGGTGTCTGATCCTTATGGACTAACTGGAAAAGTACAACCTGTAAATCCCGCGTGGGGCGT  
GGAAGGTTTTGATCCTTTTGTCCGGGAGGAATAGCCTCTCATCATATTGCAGCAGGGACATTGGGCATATTAGCGGGCT  
TATTCATCTTAGTGTCCGCCACCCCAACGTCTATACAAAGGATTACGTATGGGCAATATTGAAACTGTCTTTCCAGT  
AGTATCGTCTGCTCTTTTTTGCAGCTTTTGTGTTGCTGGAACATGTGGTATGGTTCAGCAACTACCCCGATCGAATT  
ATTTGGTCCCCTCGTTATCAATGGGATCAGGGATACTTCCAGCAAGAAATATATCGAAGAGTTGGTACCCGGGCTAGCCG  
AAAATCAAAGTTTATCAGAAGCTTGGTCTAAAATTTCCCGAAAAATTAGCGTTTTTATGATTACATCGGCAATAATCCAGCA  
AAAGGGGGATTATTAGAGCGGGCTCAATGGACAACGGGGATGGAATAGCCGTTGGATGGTTAGGACATCCCATCTTTAG  
AGATAAAGAAGGGCGTGAGCTTTTTGTACGCCGTATGCCTACGTTTTTTGAAACATTTCCAGTAGTTTTGGTAGACGGAG  
ACGGAATTGTGAGAGCCGATGTTCCCTTTTAGAAGGGCAGAATCGAAGTATAGTGTGCAACAAGTAGGCGTAACTGTTGAG  
TTCTATGGTGGCGAACTCAATGGAGTCAGTTATAGTATGCTACTGTGAAAAAATATGCTAGACGTGCTCAATTGGG  
TGAAATTTTTGAATTAGATCGTGTACTTTGAAATCCGATGGTGTTTTTCTGTAGCAGTCCAAGGGGTTGGTTTTACTTTTG  
GACATGCTTCCCTTTGCTTTGCTCTTCTTTTTTCCGACACATTTGGCATGGTGTAGAACCTTGTTCAGAGATGTTTTTGT  
GGTATTGACCCAGATTTGGATGCTCAAGTGAATTCGGAGCATTCCAAAA---  
CTTGGAGATCCAACCTACAAGGAGACAGGTA---GTC-----  
GTGGAACGCTCTTTAATGGAACCTTAGCTTTAGCTGGTTCGTGACCAAGAAACCACCGGTTTTCGCTTGGTGGGCCGGAAA

TGCCCGACTTATCAACTTGTCTGGTAACTACTCGGGGCTCACGTAGCCCATGCCGGATTAATTGTATTCTGGGCCGGAG  
CAATGAACCTATTTGAAGTGGCTCATTTCGTACCAGAGAAGCCCATGTATGAACAAGGATTAATTTTACTTCCCCATCTA  
GCTAC

Populus GTCGCTATTCTGGCTCC---

AGGGGGGAATCTGTTTCGATGGAATAATTTCTTAGATGTATTACCGCATCCCCAAGGGTTAGGCCCGCTTTTTACAGGTCA  
GTGGAATCTTTATGCTCAAAATCCCCGATTCAAGTAGTCATTTATTTGGTACCTCCCAAGGAGCAGGAAGTCCATTCTAA  
CCCTTCTCGGGGGGTTCCACCCACAAACACAAAGTTTATGGCTGACCGATATGGCACATCATCATTAGCTATTGCATTT  
CTTTTCTGATAGCGGGTACATGTATAGGACTAAGTTCGGGATTGGGCACAGTATAAAAGATCTTTTAGAAGCACATAT  
TCCTCCAGGGGGGCGATTGGGGCGTGGACATAAGGGTCTTTATGACACAATCAATAATTCACCTCATTTCATTAGGCC  
TTGCTCTAGCTTCTTTAGGGGTTATTACTTCTTTAGTAGCTCAACACATGTACTCGTTACCTGCTTATGCGTTTATAGCA  
CAAGACTTTACTACTCAAGCTGCATTATATACTCATCACAATACATCGCAGGATTCATTATGACAGGAGCTTTTGTCTCA  
TGGAGCTATATTTTTTATTAGAGATTACAATCCGGAACAGAATGAGGATAATGTATTGGCAAGAATGCTAGATCATAAAG  
AAGCTATCATATCCATTTAAGTTGGGCCAGCCTCTTTCTGGGATTCCATACTTTGGGACTTTATGTTTATAATGATGTC  
ATGCTTGCTTTTGGTACTCCGGAGAAACAAATCTTGATCGAACCATATTTGCCCAATGGATACAATCCGCTCATGGTAA  
AACTTCATATGGGTTTCGATGTACTTTTATCTTCAACGAATAGTCCAGCCTTCAATGCAGGTCGAAGCATATGGTTGCCCG  
GCTGGTTAAATGCTATTAATGAAAATAGTAATTCATTATTCTTAAACAATAGGGCCTGGAGACTTCTTGGTTCATCATGCT  
ATTGCTCTAGGTTTACATACAACACTACATTGATCTTAGTAAAAGGTGCTTTAGATGCGCGTGGTTCTAAGTTAATGCCAGA  
TAAAAGGATTTTGGTTATAGTTTTCTTTCGATGGTCCGGGACGAGGCGGTACTTGTGATATTTCCGGCTTGGGACGCAT  
TTTATTTGGCGGTTTTCTGGATGTTAAATACCATTGGATGGGTTACTTTTTATTGGCATTGGAAGCACATAACATTATGG  
CAGGGTAACGTTTTACAGTTTTAATGAATCTTCTACTTATTTGATGGGATGGTTAAGAGATTATTTATGGTTAAACTCTTC  
ACAACCTTATCAATGGGTATAACCCCTTTGGGATGAATAGTTTATCGGTCTGGGCATGGATGTTCTTATTTGGACATCTTG  
TTTGGGCTACTGGATTTATGTTCTTAATTTCTGGCGCGGATATTGGCAGGAATTGATTGAAACTTTAGCATGGGCTCAT  
GAACGTACACCTTTGGCTAATTTGATTTCGATGGAGAGATAAACCAGTAGCTCTTTCCATTGTGCAAGCAAGATTGGTTGG  
ATTAGCCCACTTTTCTGTAGGTTATATCTTCACTTATGCGGCTTTCTTGATTGCCTCTACATCGGGCAAATTTGGT---

ATGTCACATTACAGTAAAAATCTATGATACATGTATAGGGTGTACTCAATGTGTCCGGGCCTGCCCCACGGATGTATTAGA  
AATGATACCTTTGGGACGGGTGTAAAGCTAAGCAAATGCTTCTGCTCCAAGAACAGAAGACTGTGTTGGCTGTAAGAGAT  
GCGAATCCGCCTGTCCAACAGATTTCTTGAGTGTTCGAGTTTATCTATGGCATGAAACAACCTCGAAGCATGGGTCTAGCT  
TAT---

ATGACAATTCTCAACAACCTTACCCTCTATTTTTGTGCCTTTAGTGGGCTTAGTATTTCCGGCAATTGCAATGGCTTCTTT  
ATCTCTTTCATGTTCAAAAAACAAGATTTTT--ATGCGAGATCTAAAAACATATCTATCC--  
GTAGCGCCAGTAATAAGTACTCTATGGTTCGGGTCTTTAGCAGGTCTATTGATAGAGATCAATCGTTTTTTCCCGGATGC  
TTTGACATTCCCTTTTTTTTTCATTC---

ATGACTGCAATTTTAGAGAGACGCGAAAGCGAAAGCCTTTGGGGTTCGCTTCTGTAATTGGATAACCAGCACTGAAAACCG  
TCTTTATATTGGATGGTTTTGGTGTTTTGTGATTCTACTTTATTGACCGCAACTTCTGTATTTATTATCGCTTTTCATTG  
CTGCCCTCCAGTAGACATTGATGGTATTCGTGAACCTGTTTCTGGATCTCTACTTTATGGAAACAATATCATTCTGGT  
GCCATTATTCCTACTTCTGCGGCTATAGGGTTGCATTTTACCCAATATGGGAAGCGGCATCCGTTGATGAATGGTTATA  
CAACGGCGGTCTTATGAGCTAATTGTTCTACACTTCTTACTTGGTGTAGCTTGTACATGGGGCGTGGAGTGGGAACCTTA  
GTTTCCGTCTGGGTATGCGTCTTTGGATTGCTGTTGCATATTCAGCTCCTGTTGCGGGCGCTACTGCTGTTTTCTTGATT  
TATCCAATCGGTCAAGGAAGTTTTTTCGGATGGGATGCCTCTAGGAATCTCTGGTACTTTTAACTTTATGATTGTATTCCA  
GGCTGAGCACAAACATCCTTATGCACCCATTTACATGTTAGGCGTAGCTGGTGTATTCCGGCGGCTCCCTATTACAGTGCTA  
TGCATGGTTCTTTGGTAACCTCTAGTTTGTATCAGGGAAACCACAGAAAATGAATCTGCTAATGAAGGTTACAGATTTGGT  
CAAGAGGAAGAACTTATAATATCGTAGCCGCTCATGGTTATTTTGGCCGATTGATCTTCCAATATGCTAGTTTTAAACA  
CTCTCGTTCTTTACATTTCTTCTTAGCTGCTTGGCCTGTAGTAGGTATCTGGTTCACTGCTTTAGGTATTAGCACTATGG  
CTTTCAATCTAAATGGTTTTCAATTTCAACCAATCTGTAGTTGATAGTCAAGGTCGTGTAATTAATACCTGGGCTGATATT  
ATTAACCGTGCTAACCTTGGTATGGAAGTTATGCATGAACGTAATGCTCATAATTTCCCTCTAGACCTA---

GCTGCTGTCGAAGTTCATCTACAAATGGA---  
ATGGGTTTGCCTTGGTATCGTGTTCATACCGTCGTATTGAATGATCCCGGTCGTTTGGTGGCTGTCCATATAATGCATAC  
AGCTTTGGTTGCTGGTTGGGCCGGCTCGATGGCTCTATATGAATTAGCAGTTTTTGTATCCTTCTGACCCCGTTCTCGATC  
CAATGTGGAGACAAGGTATGTTTCGTTATACCCTTCATGACTCGTTTAGGAATAACCAATTCATGGGGTGGTTGGAGTATT  
ACAGGAGGAACATAACGAATCCGGGTATTTGGAGTTATGAAGGTGTGGCTGGGGCGCATATTGTGTTTTCTGGCTTGTG  
CTTCTTGGCAGCTATCTGGCATTGGGTGTATTGGGATCTAGAAATCTTTTGTGATGAACGTACAGGAAAACCTTCTTTAG  
ATTTGCCCAAGATCTTTGGAATTCATTTATTTCTCTCAGGAGTGGCTTGTTTTGGGTTTGGTGGCTTTTCATGTAACAGGA  
TTGTATGGTCTTGGAAATATGGGTGTCTGATCCTTATGGGCTAACCGGAAAAGTACAATCTGTAAATCCAGCGTGGGGTGT  
GGAAGGTTTTGATCCTTTTGTTCGGGAGGAATAGCCTCTCATCATATTGCAGCAGGGACATTGGGCATATTGGCGGGCC  
TATTCATCTTAGTGTCCGCCCGCCCAACGTCTATACAAAGGATTACGTATGGGAAATATTGAAACCGTGCTTTCCAGT  
AGTATCGCTGCTGCTTTTTTGCAGCTTTTGTGTTGCTGGAACCTATGTGGTATGGTTTCCAGCAACTACCCCATTTGAATT  
ATTTGGTCCCCTCGTTATCAATGGGATCAAGGATACTTCCAGCAAGAAATATATCGAAGAGTTGGTACTGGGCTGGCTG

AAAATCAAAGCTTATCCGAAGCTTGGTCTAAAATTCCTGAAAAATTAGCTTTTTATGATTACATCGGAAATAATCCGGCA  
AAGGGTGGATTGTTTCAGAGCAGGTTCAATGGATAACGGGGATGGAATAGCTATTGGGTGGTTAGGACATCCTCTATTTAG  
AGATAAAGAAGGGCGTGAGCTTTTTGTACGTCGTATGCCTACTTTTTTTGAAACATTTCCGGTTGTTTTGGTAGACGGAG  
ACGGAATTGTTAGAGCCGATGTTCCTTTTCGAAGGGCAGAATCGAAGTATAGTGTTGAACAAGTAGGTGTAACCTGTTGAG  
TTCTATGGTGGTGAACATAAATGGAGTCAGTTATAGTGATCCTGCTACTGTGAAAAAATATGCTAGACGCGCACAAATTGGG  
TGAAATTTTTGAATTAGATCGTGCTACTTTGAAATCCGATGGTGTTTTTTCGTAGTAGTCCAAGGGGTTGGTTTTACTTTTTG  
GACATGCTTCGTTTGCCTGCTCTTCTTCTCGGACACATTTGGCATGGCTCTCGAACCTTGTTTCAGAGATGTTTTTGTCT  
GGTATTGATCCAGATTTAGACGCTCAGGTGGAATTTGGAGCATTCCAAAA---  
CTTGGAGATCCAACATAAGAAGACAAGTA---GTT-----  
ATGAAAACCTTATATCCCTGAGGAGGTTCTACCCCGTGGAAACGCTCTTTAATGGAACCTTAGCTTTAGCTGGTCTGTGA  
CCAAGAAACCACAGGTTTTCGCTTGGTGGGCGGGGAATGCCGACTTATCAATTTATCCGGTAAACTGCTGGGAGCTCATG  
TAGCCCATGCTGGATTAATCGTATTCTGGGCCGGAGCAATGAACCTATTTGAAGTGGCCATTTTCGTACCGGAGAAGCCA  
ATGTATGAACAAGGATTAATTTTTACTTCCCCCCTAGCTAC  
Ranunculus GTCGCTATTCCCGCTCT---  
AGGGGGGAGTACGTTTCGATGGAATAATTTCTTAGATGTATTACCGCATCCCCAAGGGTTAGGCCCCCTTTTTACGGGTCA  
GTGGAATCTTTATGCCCAAAACCCCGATTCCGGTAGTCATTTATTTGGTACCTCCAAGGGGGGGGACAGCCATTCTAA  
CCCTTCTCGGGGATTTTCATCCACAAACGCAAAGTTTTATGGTTGACCGACATTGCTCATCACCATTTAGCTATTGCAATT  
ATTTTTCTCGTTGCTGGGCATATGTATAGAATAACTTCGGGATTGGGCACAGTATAAAAGATCTTTTAGAAGCACATAT  
TCCTCCGGGGGGTTCGACTGGGGCGTGGACATAAAGGCTTTTATGACACAATCAATAATTCGATTCAATTTCAATTAGGCC  
TTGCTCTAGCCTCTTTAGGGGTTATTACTTCTTTGGTAGCCCAACACATGTACTCTTTACCTGCTTATGCATTCATAGCA  
CAAGACTTTACTACTCAGGCTGCGCTATATACTCATCATCAATACATTGCAGGATTCATCATGACAGGAGCCTTTGCTCA  
TGGAGCTATATTTTTTATTAGAGATTACAATCCGGAGCAGAATGAGGATAATGTATTGGCAAGAATGTTAGACCATAAAG  
AAGCTATCATATCCCATTTAAGTTGGGCCAGCCTGTTTCTGGGATTCCATACCTTGGGACTTTATGTTTCATAACGACGCTG  
ATGCTCGCTTTTGGTACTCCGGAGAAACAAATATTGATCGAGCCCATATTTGCCCAATGGATACAATCTGCTCATGGTAA  
GACTTCATATGGGTTCGATGTACTTTTATCTTCAACGAGTGGACCGGCATTCAATGCGGGTTCGAAGCATATGGTTGCCTG  
GCTGGTAAATGCTATTAATGAGAATAGTAATTCATTATTCTTAAACAATAGGCCCGGGGACTTTTTGGTTTCATCATGCT  
ATTGCTCTAGGTTTACATACAACTACATTAATCTTAGTAAAAGGTGCTTTAGATGCACGTGGTTCGAAGTTAATGCCAGA  
TAAAAAGGATTTTCGGTTATAGTTTTCCTTTCGACGCTGGGTTGCTGGTTCGAGGTTTTCAGCTTGGGACGCGT  
TTTTATTGGCGGTTTTCTGGATGTTAAATACCATTGGATGGGTTACTTTTTTATTGGCATTGGAAGCATATCATTGTTGG  
CAGGTTAACGTTTTACAGTTAATGAATCCTCTACTTATTTGATGGGGTGGTTAAGAGATTATCTATGGTTAAATTTCTTC  
CCAACCTTATCAACGGGTATAACCCCTTTGGTATGAATAGCTTATCGGTATGGGCGTGGATGTTCTTATTTGGACATCTTG  
TTTGGGCTACCGGGTTTTATGTTCTTAATTTCTGGCGGGTATTGGCAGGAATTAATTGAAACTTTAGCCTGGGCTCAT  
GAACGCACACCTTTGGCTAATTTGATTTCGATGGAGAGATAAACCAGGTGGCTCTTTCCATTGTGCAAGCAAGATTGGTTGG  
ATTAGCCACTTTTCTGTAGGTTATATATTTCACTTATGCAGCTTTCTTGATTGCCTCTACCTCAGGCAAATTTGGT---  
ATGTCACATTACAGTAAAGATTTATGATACATGTATAGGGTGTACTCAATGTGTACGAGCTTGTCCCACGGATGTATTAGA  
AATGATACCTTTGGGATGGGTGTAAAGCTAAGCAAATTTGCTTCTGCTCCAAGAACAGAAGACTGTGTAGGTTGTAAAGAT  
GTGAATCCGCTTGTCCAACGGATTTTTTGGAGTGTCCGAGTTTATTTATGGCACGAGACAACCTCGTAGTATGGGCTTAGCT  
TAT---ATGACAACCTTTCAAC---  
TTACCCTCCTTTTTTGTGCCTTTAGTGGGTCTAGTATTTCCAGCAATTGCAATGGCTTCTCTATCTCTTCATGTTCAAAA  
AAACAAAATTGTC---ATGCGAGATCTAAAAACATATCTCTCC---  
GTGGCACCTGTGTTAAGCACTCTATGGTTGGGCTTTAGCAGGTCTATTGATTGAGATCAATCGTTTTATTTCCAGATGC  
GTTGACATTTCCATTTTTTTTCATTC---  
ATGACTGCAATTTTAGAGAGACGCGAAAGTGAAAGCCTATGGGGTTCGCTTCTGTAACCTGGGTAACCAGCACTGAAAACCG  
TCTTTACATTGGATGGTTCGGTGTTTTGTATGATCCCAACTTTATTGACCGCTACTTCTGTATTTATTATCGCCTTCATTG  
CTGCACCTCCAGTAGATATTGATGGTATTCGTGAACCCGTTTCTGGGTCTCTACTTTATGGAATAATATTTATTTCTGGT  
GCTATTTATCTACTTCTGCAGCTATCGGGTGCATTTTATCCGATTTGGGAAGCAGCATCTGTTCGATGAATGGTTATA  
CAATGGTGGTCTTTATGAACATAATTGTTCTACACTTCTACTTGGTGTAGCTTGTACATGGGTCGTGAGTGGGAACCTTA  
GTTTTCCGTTTTAGGATATGCGCCCTTGATTGCTGTTGCATATTCAGCTCCTGTTGCAGCGGCTACCGCTGTTTTCTTGATC  
TACCCAATTGGTCAAGGAAGCTTCTCTGATGGTATGCCTCTAGGAATTTCTGGTACTTTCAACTTTATGATTGTATTCCA  
GGCTGAGCACAACATCCTTATGCACCCATTTACATGTTAGGCGTAGCTGGTGTATTTCGGCGGCTCCCTATTCAGTGCTA  
TGCATGGTCTTTTGGTAACTCTAGTTTGTATCAGGGAAACCACTGAAAATGAATCTGCTAATGAAGGTTACAGATTCCGGT  
CAAGAGGAAGAACTTATAATATCGTAGCTGCTCATGGTTATTTTTGGCCGATTGATCTTCCAATATGCTAGTTTCAACAA  
TTCTCGTTCTTTACACTTCTTCTTAGCTGCTTGGCCTGTAGTAGGTTATTTGGTTCCTGCTTTAGGTATCAGCACTATGG  
CTTTCAACCTAAACGGTTTTCAATTTCAACCAATCTGTAGTTGATAGTCAAGGTCGTGTAATTAACACTTGGGCAGATATC  
ATCAACCGCGCTAACCTTGGTATGGAAGTTATGCATGAACGTAATGCTCACAATTTCCCTCTAGACTTA---  
GCTGCTGTTGAAGTTCCATCTATAAATGGC---  
ATGGGTTTGCCTTGGTATCGTGTTTCATACCGTCTGATTGAATGATCCCGTTCGGTTGCTTGTACATATAATGCATAC

AGCTCTCGTTTTCTGGTTGGGCCGGTTCAATGGCTCTCTACGAATTAGCCGTTTTTGGATCCCTCTGACCCCGTTCTTGATC  
CAATGTGGAGACAGGGTATGTTTCGTTATACCCTTCATGACTCGTTAGGAATAACCAACTCATGGGGTGGTTGGAGTATT  
ACAGGAGGGACTATAACGAATCCGGGTATTTGGAGTTACGAAGGTGTGGCCGGGGCACATATTGTGTTTTCTGGTTTTGTG  
CTTCTTGGCAGCTATCTGGCATTGGGTATATTGGGATCTCCAAATATTCTGTGATGAACGTACAGGGAAACCTCTTTAG  
ATTTGCCTAAGATCTTTGGAATTCATTTATTTCTCTCAGGATTAGCTTGGCTTTGGATTTGGTGCATTTTCATGTAACAGGC  
TTGTATGGTCTCGGAATATGGGTGTCCGATCCTTATGGACTAACCGGAAAAGTACAATCTGTAAATCCTGCGTGGGGAGT  
GGAAGTTTTGATCCTTTTGTTCGGGAGGAATAGCCTCCCATCATATTGCAGCGGGTACGTTGGGCATATTAGCGGGCC  
TATTCATCTTAGTGTCCGCCCCGCCAACGTCTCTATAAAGGATTACGGATGGGTAATATTGAAACAGTCTTTCCAGT  
AGTATTGCTGCTGTCTTTTTTGCAGCTTTTGTGTTGCTGGAACATGTGGTACGGCTCCGCAACTACCCCGATCGAATT  
ATTTGGTCCCCTCGTTATCAATGGGATCAAGGATACTTCCAACAAGAAATATATCGAAGGGTGGTGCCGGACTAGCCG  
AAAATAAGAGTTTTATCAGACGTTTTGGTCTAAAATTTCCCGAAAAATTTGGCTTTTTATGATTACATTGGAATAACCCGCA  
AAAGGGGATTATTTAGAGCAGGCTCAATGGACAACGGGGATGGAATAGCCGTTGGATGGTTAGGACATCCCATTCTTTAG  
AGATAAAGAGGGACGCGAGCTGTTTGTACGTCTGATGCCTACTTTTTTTGAAACATTTCCAGTAGTTTTGGTAGATGGAG  
ATGGAATTGTAAGAGCCGATGTTCTTTTAGAAGGGCAGAATCCAAGTATAGTGTGCAACAGGTAGGAGTAACTGTTGAG  
TTCTATGGTGGCGAACTCGATGGAGTCAGTTATAGCGACCCCGCTACTGTGAAAAAGTATGCTAGACGCGCTCAATTGGG  
TGAAATTTTTGAATTAGATCGCGCTACTTTGAAATCCGACGGTGTTTTTTCGTAGCAGCCCAAGGGGTTGGTTCACTTTTG  
GACACGCTTCGTTGCTTTACTCTTTCTTTTTTCGGACATATTTGGCATGGTGTGCTAGAACCTTATTCAGAGATGTTTTGCT  
GGTATTGACCCGGATTTGGATGCTCAAGTGGAAATTTGGAGCATTCCAAAAA---  
CTTGGAGATCCAACACTACAAAGAGACAAGTA---GTC-----  
ATGAAAACCTTATATTCCCCGAGGAGGTTCTACCCCGTGAAACGCTCTTTAATGGAACTTTAGCTTTAGCTGGTCTGTA  
CCAAGAAACCACTGGTTTTCGCTTGGTGGGCCGGGAACGCCCGACTTATTAATTTGTCCGGTAAACTACTCGGGGCTCACG  
TAGCCCATGCTGGATTAATTGATTCTGGGCAGGAGCAATGAACCTGTTTGAAGTGGCGCATTTTCGTACCCGAGAAGCCC  
ATGTATGAACAAGGATTGATTTTACTTCCCCACTTAGCTAC  
Spinacia GTCGCTATTCCCGGATCC---  
AGAGGAGAGTACGTTTCGATGGAATAATTTCTTAGACGTATTACCACATCCTCAAGGATTAGGTCCCCTTTTTACAGGTCA  
GTGGAATCTTTATGCTCAAAACCCCGATTCAAGCAGTCATTTATTTGGTACCTCCCAAGGGGCGGGAACCTGCCATCCTAA  
CCCTTCTTGGGGGATTTTCATCCACAAACGCAAAGTTTATGGCTAACTGATATGGCTCATCATCATTTAGCTATTGCATTT  
GTTTTCTTGGTGGCGGTATATGTATAGAACAAGTCTTTGGGATTTGGGCACAGTATGAAAGATCTTTTAGAAGCGCATAT  
TCCCCAGGGGGACGATTGGGACGCGGACATAAAGGTCTTTATGACACAATCAACAATTCGCTTCATTTTCAATTAGGAC  
TTGCCCTAGCGTCTTTAGGTGTTATAAATCTTGGTAGCCCAACACATGTACTCTTTACCTGCTTATGCGTTTCATAGCC  
CAAGATTTTACGACTCAAGCTGCGTTATATACACATACCAATACATCGCAGGATTCATTATGACAGGAGCTTTTGCTCA  
TGGAGCTATATTTTTTATTTCGAGATTACAATCCGGAACAGAATGAAGATAATGTATTGGCAAGAATGTTAGACCATAAAG  
AAGCTATTATATCCCATTTAAGTTGGGCCAGTCTCTTTTTAGGGTTCCATACCTTGGGTCTTTATGTTTATAATGATGTC  
ATGCTTGCTTTTGGTACTCCAGAAAAACAATTTTGTATCGAACCCATATTTGCTCAATGGATAACAATCTGCTCATGGGAA  
AACTTCATATGGGTTTGGTACTTTTATCCTCAACAAGTGGACCGGCATTCAATGCGGGTTCGAAGTATATGGTTGCCTG  
GCTGGTTAAATGCTGTTAATGAGAATAGTAATTCCTATTCTTAACAATAGGGCCTGGAGACTTTTTGGTTCATCATGCT  
ATTGCTCTAGGTTTACATACAACACTACATTGATCTTAGTAAAAGGTGCTTTAGATGCACGCGGTTCAAAGTTAATGCCAGA  
TAAAAGGATTTTCGGTTATAGTTTTCTTGCATGGTCCAGGACGAGGCGGTACTTGTGATATTTTCGGCTTGGGACGCAT  
TTTTTTGGCGGTTTTCTGGATGTTAATACCATTGGGTGGGTTACCTTTTTATTGGCATTGGAACACATCACATTATGG  
CAGGGTAATGTTTACAATTTAATGAATCTTCCACTTATTTGATGGGATGGTTAAGAGATTATCTATGGTTAAACTCTTC  
ACAACCTTATCAATGGATATAATCCATTTGGTATGAATAGTTTATCGGTTTGGGCCTGGATGTTCTTATTTGGACATCTTG  
TTTGGGCTACGGGATTTATGTTCTTAATTTTCGTGGCGTGGATATTGGCAGGAGTTGATTGAAACTTTAGCATGGGCTCAT  
GAACGCACACCTTTGGCCAATTTGATTTCGATGGAGAGATAAACCAGGTAGCTCTTTCCATTGTACAAGCAAGATTAGTTGG  
ATTAGCCACTTCTCCGTAGGTTATATATTCACATATGCGGCTTTCTTGATTGCCTCTACATCGGGCAAATTCGGT---  
ATGTCACATTCAGTTAAGATTTATGATACATGTATAGGATGTACTCAATGTGTTTCGAGCTTGCCCCACAGATGTATTAGA  
AATGATACCTTGGGATGGATGTAAGCTAAACAATAGCTTCTGCTCCAAGAACAGAGGATTGTGTTGGTTGTAAGAGAT  
GTGAATCCGCTTGTCCAACGGATTTTTTAAGCGTTTCGGGTTTTATTTATGGCATGAAACAACCCGCAGTATGGGTCTAGGG  
TAT---ATG-----AAC---  
TTTCCCTCTATTTTTGTGCTTTTAGTAGGCCTAGTATTTCCGGCAATTGCAATGGCTTCTTTATTTCTTTATGTTCAAAA  
AAATAAGATTGTT---ATGCGAGATTTCAAACATATCTTTCT---  
GTGGCACCGGTAAGCACTTTATGGTTTGGGTCTTTAGCTGGTCTATTAATAGAAATCAATCGTTTTTTTCCAGATGC  
GTTGACATTTCCCTTTTTTTTCATTC---  
ATGACTGCAATTTTAGAGAGACGCGAAAGCGAAAGCCTATGGGGTTCGCTTCTGTAATTGGATAACCAGCACTGAAAACCG  
TCTTTACATTGGATGGTTTTGGTGTTTTTGATGATCCCTACCTTATTGACTGCAACTTCTGTATTTATTATAGCCTTCATTG  
CTGCTCCTCCAGTAGATATTGATGGTATTCGTGAACCTGTTTCCGGATCTCTACTTTACGGAAATAATATTTTCCGGT  
GCCATTATTCCTACTTCTGCAGCTATAGGGTTGCATTTTTATCCAATCTGGGAAGCGGCATCGGTTGATGAGTGGTTATA  
CAATGGTGGTCTTATGAACATAATTGTTCTACACTTCTTACTTGGTGTAGCTTGTATATGGGTCTGAGTGGGAACCTTA

GTTTCCGTCTAGGTATGCGCCCTTGGATTGCTGTTGCATATTCGCTCCAGTTGCAGCGGCTACTGCTGTTTTCTTGATC  
TACCCAATCGGTCAAGGAAGCTTTTTCTGATGGTATGCCTCTAGGAATCTCCGGTACTTTCAACTTTATGATTGTATTCCA  
GGCTGAGCACAACATCCTTATGCACCCATTTACATGTTAGGTGTAGCTGGTGTATTTCGGCGGCTCCCTATTTAGTGCTA  
TGCATGGTTCCTTGGTAACTTCTAGTTTGTATCAGGGAAACCACAGAAAATGAATCTGCTAATGAAGGTTACAGATTCCGGT  
CAAGAGGAAGAACTTATAATATCGTAGCTGCTCATGGTTATTTTGGTTCGATTGATCTTCCAATATGCTAGTTTCAACAA  
CTCTCGTTCTTTACACTTCTTCTTAGCTGCTTGGCCTGTAGTAGGTATTTGGTTTACTGCTTTAGGTATTAGTACTATGG  
CTTTCAACTTAAATGGTTTTCAATTTCAACCAATCTGTAGTTGATAGTCAAGGTCGTGTAATTAATACTTTGGGCTGATATC  
ATTAACCGTGCTAACCTTGGTATGGAAGTTATGCATGAACGTAATGCTCATAACTTCCCTCTAGACCTA---

GCTGCTATTGAAGCTCCATCTACAAATGGA---

ATGGGTTTGCCTTGGTATCGTGTTCATACTGTTGTATTGAATGATCCCGGCCGGTTGATTTCTGTCCATATCATGCATAC  
AGCTCTGGTTGCTGGTTGGGCCGGTTCGATGGCTCTATATGAATTAGCTGTTTTTGTATCCCTCTGACCCCGTTCTTGATC  
CAATGTGGAGACAGGGTATGTTTCGTTATACCTTTTCATGACTCGTTTAGGAATAACCAATTCGTGGGGCGGTTGGAGTATT  
ACAGGGGGTACTATAACGGATCCTGGCATTGGAGTTACGAAGGTGTGGCCGGAGCGCATATTATGTTTTCGGGCTTGTG  
CTTTTTGGCCGCTATTTGGCATTGGGTATATTGGGATTTAGAAAATTTTTCGGATGAACGTACAGGAAAACCTTCTTTGG  
ATTTGCCTAAGATTTTTGGAATTCATTTATTTCTTTCCGGGGTGGCTTGTTTTGGTTTTGGTGCATTTTCATGTAACAGGC  
TTGTACGGGCCCCGGAATATGGGTATCCGATCCTTATGGACTAACTGGAAAAGTACAACCTGTAAGTCCAGCATGGGGCGT  
GGAAGTTTTGATCCTTTTTGTTCCAGGAGGAATAGCCTCTCATCATATTGCAGCAGGAACATTAGGTATATTAGCAGGTC  
TATTCATCTTAGTGTCCGTCCGCCTCAACGTCTATACAAAGGATTACGTATGGGCAACATTGAAACCGTTCTTTCTAGT  
AGTATCGCTGCTGTCTTTTTTGCAGCTTTTGTGTTGCGGGAACATATGTGGTATGGTTCCGCAACTACCCCGATCGAATT  
ATTTGGCCCCACTCGTTATCAATGGGATCAGGGATACTTTTCAGCAAGAAATATACCGACGAGTAAGTGTGGGCTAGCCG  
AAAATCAAAGTTTTCTCAGAAGCTTGGTCAAAAATTTCCCGAGAAATTTGGCTTTTTATGATTACATTGGAATAATCCGGCG  
AAAGGGGGATTATTTAGAGCAGGCTCAATGGACAACGGCGATGGAATAGCTGTTGGATGGTTAGGACACCCTATTTTTAG  
AGATAAAGAAGGACGTGAACCTTTTGTACGACGTATGCCTACTTTTTTGAACCTTTCCGGTCGTTTTGATAGATGGGG  
ACGGAATTGTTTCGAGCTGATGTTCCCTTTTAGAAGAGCAGAATCTAAGTATAGCGTTGAACAAGTAGGTGTAACCTGTTGAG  
TTTTACGGCGGCGAACTAAACGGAGTTAGTTATAGCGATCCTGCTACTGTCAAAAAATATGCTAGACGTGCTCAATTAGG  
TGAAATTTTCGAATTAGACCGTGCTACTTTGAAATCAGATGGTGTTTTTTCGCAGTAGTCCGAGGGGTTGGTTTTACTTTTG  
GACATGCTTCCCTTTGCCCTACTCTTCTTCTCGGACACATTTGGCATGGGTCTAGAACCTTGTTCAGAGATGTTTTTGT  
GGGATTGACCCCGATTTGGATGTTCAAGTAGAATTTGGCGCATTTCCAAAAA---

ATTTGGAGATCCAACATAAGAAGACAAGGA----GTT-----

ATGAAAACCTTATATTTCCCTGAGGAGGTTCTACCCCGTGAAACGCTCTTTAATGGAACTTAACTTTAGCCGGCCGTGA  
CCAAGAAACCACCGTTTTGCTTGGTGGGCCGGGAATGCTCGACTTATCAATTTATCTGGTAAACTACTTGGAGCTCATG  
TAGCCCATGCCGATTAATCGTATTCTGGGCCGGAGCAATGAACCTTATTTGAAGTGGCTCATTTCGTACCAGAGAAGCCT  
ATGTATGAACAAGGATTAATTTTACTTCCCCACCTAGCTAC

Triticum GTTGCTATTCCCGCATCC---

AGGGGGGAGTACGTTTCGATGGAATAATTTCTTAGATGTATTACCCTATCCCCAGGGGTTGGGACCCCTTTTTGACGGGTCA  
ATGGAATCTTTATGCCCAAAACCCTGATTCGAGTAATCATTTATTTGGTACCGCTCAAGGAGCCGGAACCTGCCATTCTAA  
CTCTTCTTGGGGGATTCCATCCACAACACAAAGTTTTGTGGCTGACCGATATGGCTCACCATCATTTAGCTATTGCATTT  
ATTTTTCTCATTGCCGGTACATGTATCGAATAACTTCGGAATTTGGGCACAGTATTAAGATCTTTTAGAAGCGCATAC  
TCCTCCGGGGGGTTCGATTAGGGCGTGGGCATAAGGGCCTTTATGACACAATCAACAATTCGATTCATTTTTTCAGTTAGGTC  
TTGCTCTAGCTTCTTTAGGGGTTATTACTTCTTAGTAGCTCAACATATGACTCTTTACCTCCTTATGCATTATAGCA  
CAAGACTTTACTACTCAAGCTGCTTTATATACTCATACCAATATATTGCAGGGTTCATCATGACAGGGGCTTTTGCTCA  
TGGAGCTATTTTTTTCATTAGGGATTACAATCCGGAACAGAATGAGGATAATGTATTGGCAAGAATGTTAGACCATAAAG  
AAGCTATCATATCTCATTAAAGTTGGGCTAGCCTCTTTCTAGGATTCCATACCTTGGGCCTTTATGTTTATAACGACGTC  
ATGCTTGCTTTTGGTACTCCAGAAAAGCAAATCTTGATCGAACCTATATTTGCCCAATGGATACAATCTGCTCATGGCAA  
GACGACATATGGGTTTCGATATACTCTTATCTTCAACGAATGGCCCCGCTTTCAATGCGGGTTCGAAGCCTATGGTTGCCCG  
GATGGTTGAATGCTGTTAATGAGAATAGTAATTCGCTTTTCTTAAACAATAGGACCTGGGGATTTCTTGGTTTCATCATGCT  
ATTGCTCTAGGTTTGCATACAACACTACATTTGATTTTTAGTAAAGGGCGCTTTAGATGCACGCGGTTCCAAATTAATGCCGGA  
TAAAAAGGATTTTGGATATAGTTTTCTTGTGACGGCCCAGGGCGCGGCTACTTGTGATATTTCTGCTTGGGACGCAT  
TTTTATTTGGCAGTTTTCTGGATGTTAAATACCATTGGGTGGGTTACTTTTTATTGGCATTGGAACATATCACATTATGG  
CAGGGCAACGTTTTACAATTTAATGAATCCTCCACTTATTTGATGGGATGGTTAAGAGATTACCTATGGTTAAACTCTTC  
ACAACCTATCAATGGATATAATCCTTTTGGGATGAATAGTTTATCGGTATGGGCGTGGATGTTCTTATTTGGACATCTTG  
TTTGGGCTACTGGATTTATGTTCTTAATTTCTGGCGGGGTTATTGGCAGGAATTAATTGAGACTTTAGCATGGGCTCAT  
GAACGCACACCTTTAGCTAATTTAATTCGCTGGAGAGATAAGCCCGTGGCTCTTTCCATTGTGCAAGCAAGATTGGTTGG  
ATTAGCTCACTTTCCGTGGGTTATATATTTCACTTATGCAGCTTTCTTGATTGCCTCAACATCAGGCAAGTTTGGT---

ATGTCACATTCGGTAAAAATTTACGATACATGTATAGGATGCACTCAATGTGTACGAGCTTGTCCAACAGATGTATTAGA  
AATGATACCCTGGGATGGATGTAAAGCCAAGCAAATTTGCTTCCGCGCCGAGAACCAGGATTGTGTGGGTTGTAAGAGAT  
GTGAATCTGCCTGCCCGACAGATTTTTTAAAGTGTCCGCTTTATTTAGGGCCTGAAACAACACGTAGCATGGCTCTATCT

TAT-----

TTACCTTCTATTTTCGTGCCTTTAGTAGGCTTAGTATTTCCGGCAATTGCAATGACTTCTTTATTTCTTTATGTGCAAAA  
AAATAAGATTGTC---ATGCGGGATATAAAAAACATATCTCTCT---

GTAGCACCCGTGCTAAGTACTCTATGGTTTGGTGTCTTTAGCAGGTTTATTGATAGAAAATTAATCGTTTATTCCCAGATGC  
TTTGTCATTCCCTTTTTTT-----

ATGACTGCAATTTTAGAGAGACGCGAAAGTACAAGCCTGTGGGGTCGCTTCTGCAACTGGATAACTAGCACTGAAAATCG  
TCTTTACATCGGATGGTTCGGTGTTTTGTATGATCCCTACCTTATTGACCGCAACTTCTGTATTTATTATCGCCTTCATCG  
CTGCCCCCTCCAGTAGATATTGATGGTATTCGTGAGCCTGTTTCTGGTCTTTACTTTATGGAAACAATATTATCTCTGGT  
GCTATTATCCCTACTTCTGCGGCATCGGATTGCACCTTTACCCAATTTGGGAAGCTGCATCTGTTGATGAGTGGTTATA  
CAATGGTGGTCTTTATGAGCTAATTGTTCTACACTTCTTACTTGGTGTAGCTTGTATATGGGTGCTGAGTGGGAACCTA  
GTTTCCGCTCTGGGTATGCGTCTTTGGATTGCTGTTGCATATTCAGCTCTGTTGCAGCTGCCACTGCTGTTTTCTTGGATT  
TACCCTATTGGTCAAGGAAGCTTTTCTGATGGTATGCCTTTAGGAATCTCTGGTACTTTCAACTTTATGATTGTATTCCA  
GGCAGAGCATAACATCCTTATGCATCCATTCCACATGTTAGGTGTAGCTGGTGTATTTCGGCGGTTCCCTATTTCAGTGCTA  
TGCATGGTTCCTTGGTAACCTCTAGTTTGTATCAGGGAACTACTGAAAATGAATCTGCTAATGAGGGTTACAAATTTGGT  
CAAGAGGAAGAACTTATAATATTGTGGCTGCTCATGGTTATTTTGGCCGATTAATCTTCCAATATGCTAGTTTCAACAA  
CTCTCGTTCTTTACACTTCTTCTTGGCTGCTTGGCCTGTAGTAGGAATCTGGTTCACTGCTTTAGGTATTAGTACTATGG  
CTTTCAACCTAAATGGTTTTCAATTTCAACCAATCTGTAGTTGATAGTCAAGGTGCGGTTATTAATACTTGGGCTGATATC  
ATCAACCGTGTAACTTGGTATGGAAGTAATGCACGAACGTAATGCTCACAACCTCCCTCTAGACTTA---

GCTGCTGTTGAAGTTCATCTATTAATGGA---

ATGGGTTTGCCTTGGTATCGTGTTCATACTGTCGATTGAATGATCCGGGTCGATTGCTTGCGGTGCATATAATGCACAC  
AGCTCTAGTTTCTGGTGGGCTGGCTCAATGGCTTTATACGAATTAGCAGTTTTTGTATCCCTCTGATCCTGTTCTGGATC  
CAATGTGGAGACAAGGTATGTTTCGTAATTCCTTTCATGACTCGTTTAGGAATAACGGATTTCGTGGGGTGGTGGAGTATT  
TCAGGAGGAAGTGAACAAATCCGGGTATTTGGAGTTATGAAGGTGTGGCAGGTACGCATATTGTGTTTTCTGGCTTGTG  
TTTCTTGGCAGCGATCTGGCATTGGGTATATTGGGACCTAGAAATATTCTCTGATGAGCGGACGGGAAAACCTCTTTGG  
ATTTGCCCAAGATCTTTGGAATTCATTTATTTCTTGCAGGGGTGGCTTGGCTTTGGGTCATTTTCATGTAACGGGT  
TTGTATGGTCTTGGGATATGGGTATCCGATCCTTATGGACTAACTGGAAAAGTACAAGCTGTAAATCCAGCGTGGGGTGC  
AGAAGTTTTGATCCTTTTGTCCGGGGGAATAGCTTCTCATCATATTGCTGCGGGTACATTGGGTATATTAGCGGGCT  
TATTCATCTTAGTGTCCGTCGCTCAACCTATATAAAGGATTACGTATGGCAATATTGAACTGTACTTTCCAGT  
AGTACGCTGTGTTTTTTTTCGAGCTTTTCGATTTGCTGGAACCTATGGGTATGGGTGAGGACAGCAACCTCAATGAAAT  
ATTTGGGCTACTCGTTTATCAGTGGGATCAGGGATACTTTTCAGCAAGAAATATATCGAAGAGTTAGCAATGGTTTTAGCCG  
AAAATCTTAGTTTTATCAGAAGCTTGGTCTAAAATTTCCCGAAAATTAGCCTTTTATGATTATATTGGTAATAATCCGGCA  
AAAGGGGGATTATTTCAGAGCAGGCTCAATGGACAATGGGGATGGAATAGCTGTTGGATGGTTAGGACATCCCGTCTTTAG  
AGATAAAGAAGGACGTGAGCTTTTTGTACGCCGTATGCCTACTTTTTTTGAAACATTTCCGGTGTTTTTGGTAGATGAGG  
AGGGAATTGTTAGAGCAGACGTTCCTTTTAGAAGAGCAGAATCCAAATATAGTGTGAACAAGTAGGCGTAACGGTGGAG  
TTCTATGGTGGCGAACTTAATGGAGTAAGTTATTCTGATCCTGCTACTGTAAAAAATATGCGAGGCGTTCTCAATTAGG  
GGAAATTTTTGAATTAGACCGGGCTACTTTGAAATCTGATGGTGTTTTTTCGCAGCAGTCCAAGGGGTTGGTTCACTTTTG  
GTCATGCTACCTTTGCTTTGCTCTTCTTTTTTCGGACACATTTGGCATGGCGCTAGAACATTGTTCCGAGATGTTTTGCT  
GGTATTGATCCAGATTTGGATGCTCAAGTGAATTTGGAACATTTCCAAAA---

GTGGGAGATCCAACAAGGAAACAGGCA---GCC-----

ATGAAAATCTTATATTCCCTGAGGAGGTTCTACCACGTGGAAACGCTCTTTAATGGAACTTTTCGTTTTAGCTGGTTCGTGA  
CCAAGAAACCACCGGCTTTGCTTGGTGGGCTGGGAATGCCAGACTTATCAATTTGTCCGGTAAACTACTTGGAGCTCATG  
TAGCCCATGCCGATTAATCGTATTCTGGGCCGGAGCAATGAACCTATTTGAAGTGGCCATTTTCGTACCAGAAAAGCCC  
ATGTATGGACAAGGGTTGATTTTACTTCCACACTTAGCTAC

Typha GTCGCTATTCTGCATCC---

AGGGGAGAGTACGTGAGTGAATAATTTCTTAGACGTATTACCATATCCCAAGGGTTGGGACCCCTTCTTACGGGTCA  
GTGGAATCTTTATGCCAAAACCTGATTTCGAGTAGTCAATTTATTTGGTACCTCCAAGGAGCGGGAACCTGCCATTCTAA  
CCCTTCTTGGGGGATTTTCATCCAAAACGCAAAAGTTTATGGCTGACTGATATGGCTCATCATCATTTAGCTATTGCATTT  
ATTTTTCTCATTGCTGGTCAATATGTATAGAACCAACTTCGGGATTGGGCACAGTATCAAAGATCTTTTAGAAGCACATAC  
CCCCCGGGTGGTTCGATTAGGACGTGGGCATAAGGGTCTTTATGACACAATCAATAATTCAATTCATTTTCAATTAGGTC  
TTGCTCTAGCCTCTTTAGGGGTTATTACTTCCCTTAGTAGCTCAACATATGTACTCTTTACCTGCTTATGCATTCATAGCA  
CAAGACTTTACTACTCAAGCTGCCTTATATACTCATCACAATACATCGCAGGGTTCATCATGACAGGAGCCTTTGCTCA  
TGGAGCTATATTTTTTATTAGAGATTACAATCCGGAACAGAATGAGGATAATGTATTGGCAAGAATGTTAGACCATAAAG  
AAGCTATCATATCTCATTAAAGTTGGGCCAGTTTGTCTTGGGGTTCATACCTTGGGCCTTTATGTTTATAACGACGTC  
ATGCTCGCTTTTGGTACTCCGGAAAAACAAATCTTGATCGAACCATATTTGCCCAATGGATAACAATCTGCTCATGGTAA  
AACTTCATATGGGTTTCGATGTACTCTTATCTTCAACGAGCGGCCCGGCTTTAATGCAGGTGCAAGCATATGGTTACCCG  
GATGGTTGAATGCTGTTAATGAGAATAGTAATTCACTCTTCTTAAACAATAGGCCCTGGGGATTTCTTGGTTCATCATGCT  
ATTGCTCTAGGTTTGCATACAACCTACATTGATTTTAGTAAAAGGTGCTTTAGATGCACGTGGTTCGAAATTAATGCCGGA

TAAAAAGGATTTTCGGTTATAGTTTTCTTGGCAGCGCCAGGACGCGCGGTACTTGTGATATTTCTGCTTGGGACGCAT  
TTTATTTGGCAGTTTTCTGGATGTTAAATACCATTGGATGGGTTACTTTTTATTGGCATTGGAAACACATCACATTATGG  
CAGGGTAACGTTTTACAATTTAATGAATCCTCCACTTATTTGATGGGATGGTTAAGAGATTATCTATGGTTAAACTCTTC  
ACAACCTATCAATGGATATAATCCTTTTGGTATGAATAGTTTATCGGTATGGGCGTGGATGTTCTTATTTGGACATCTTG  
TTTGGGCTACTGGATTTATGTTCTTAATTTCTGGCGTGGATATTGGCAGGAATTGATTGAAACTTTAGCATGGGCTCAT  
GAACGCACACCTTTGGCTAATTTGATTGATGGAGAGATAAGCCAGTGGCTCTTTCCATTGTGCAAGCAAGATTGGTTGG  
ATTAGCCCCTTTTCCGTGGGTTATATATTTCACTTATGCAGCTTTCTTGATTGCCTCTACATCAGGAAAATTTGGT---  
ATGTCACATTACAGTAAAAATTTATGATACATGTATAGGGTGTACTCAATGTGTACGAGCTTGCCCCACAGATGTATTGGA  
AATGATACCTTGGGACGGATGTAAAGCCAAGCAAATTTGCTTCCGCGCCAAGAACCAGGACTGTGTAGGTTGTAAAAGAT  
GTGAATCCGCTGCCAACAGATTTTTTGGAGTGTTCGTGTTATTTAGGACCTGAAACAACCTCGCAGCATGGCTCTATCT  
TAT---ATGACAGATCTCAAC---  
TTACCCTCTATTTTTGTGCCTTTAGTAGGCCTAGTATTTCCGGCAATTGCAATGGCTTCTTTATCTCTTCATGTCCAAAA  
AAATAAGATTGTC---ATGCGAGATATAAAAAACATATCTCTCT---  
GTGGCACCTGTGCTAAGTACTCTATGGTTTGGGTCTTTAGCGGGTCTATTGATAGAAATAAATCGTTTATTCCCCGATGC  
CTTGTCATTCCCTTTTTTTT-----  
ATGACTGCAATTTTAGAGAGACGCGAAAGTACAAGCCTATGGGGTTCGCTTCTGCAACTGGATAACCAGCACTGAAAATCG  
TCTTTACATTGGATGGTTCCGGTGTTTTGTATGATCCCTACCTTATTGACCGCAACTTCTGTATTTATTATCGCCTTCATTG  
CTGCTCCTCCAGTAGATATTGATGGTATTCGTGAACCTGTTTCTGGTTCTTTACTTTATGGAAACAATATTATCTCTGGT  
GCCATTATTTCCAACCTTCTGCAGCTATTGGGTTGCATTTTTACCCAATATGGGAAGCAGCATCTGTTGATGAGTGGTTATA  
CAATGGTGGTCTTTATGAACATAATTGTTCTACACTTCTTACTTGGTGTAGCTTGTACATGGGTCTGAGTGGGAACCTTA  
GTTTCCGTCTGGGTATGCGTCTTTGGATTGCTGTTGCATATTCAGCTCCTGTTGCAGCTGCTACTGCAGTTTTCTTGATC  
TACCCTATTGGTCAAGGAAGTTTTCTCTGATGGTATGCCTTTAGGAATTTCTGGTACTTTCAACTTTATGATTGTATTCCA  
GGCAGAACACAACATCCTTATGCATCCATTTACATGCTAGGTGTAGCTGGTGTATTTCGGCGGCTCCCTATTACAGTGCTA  
TGCATGGTTCTTTGGTAACCTCTAGTTTGTATCAGGGAAACTACTGAAAACGAATCTGCTAATGAAGGTTACAGATTTGGT  
CAAGAGGAAGAACTTATAATATCGTAGCTGCTCATGGTTATTTTGGCCGATTAATCTTCCAATATGCTAGTTTCAACAA  
TTCTCGTTCTTTACATTTCTTCTTGGCTGCTTGGCCTGTAGTTGGTATCTGGTTCACTGCTTTAGGTATTAGTACTATGG  
CTTTCAACCTAAATGGTTTTCAACTTCAACCAATCTGTAGTTGACAGTCAAGGTCGTGTTATTAACACTTGGGCTGATATC  
ATCAACCGTGTAACTTTGGTATGGAAGTAATGCATGAACGTAATGCTCACAACCTCCCTCTAGACCTA---  
GCTGCTGTTGAAGTTCCATCTATCAATGGA---  
ATGGGTTTGCCTTGGTATCGTGTTCATACTGTCTGATTGAATGATCCCGGTTCGATTGATTTCTGTTTCATATAATGCATAC  
AGCTTTAGTTGAGGTTGGGCCGTTTCGATGGCTTTTATACGAATTAGCGGTTTTTGTATCCCTCCGATCCCGTTCTTGATC  
CAATGTGGAGACAAGGTATGTTTCGTTATACCTTTTCATGACTCGTTTAGGAATAACCAATTCGTGGGGTGGTTGGAGTATT  
TCAGGAGGAAGTGAACGAATCCGGGTATTTGGAGTTATGAAGGTGTGGCAGGAGCACATATTGTGTTTTCTGGCTTGTG  
CTTCTTGGCAGCTATCTGGCATTGGGTATATTGGGACCTAGAAATATTTCACTGATGAACGTACAGGAAAACCTTCTTTGG  
ATTTGCCCAAGATCTTTGGAATTCATTTATTTCTCTCAGGGGTGGCTTGTCTTTGGCTTTGGCGCATTTTCATGTAACAGGT  
TTGTATGGTCTTGGAAATATGGGTGTCCGATCCTTATGGACTAACTGGAAAAGTACAATCTGTAAATCCAGCATGGGGCGC  
AGAAGGTTTTGATCCTTTTGTTCGGGAGGAATAGCCTCTCATCATATTGCAGCGGTACATTGGGCATATTAGCAGGCC  
TATTCATCTTAGTGTCCGTCTCTCAACGTCTATACAAAGGATTACGTATGGGCAATATTGAAACTGTACTTTCCAGT  
AGTATCGCTGCTGTTTTTTTTTGCAGCTTTCTGTTGTTGCTGGAACCTATGTGGTATGGTTTCCAGCAACTACCCCAATCGAATT  
ATTTGGTCTACTCGTTATCAGTGGGATCAGGGATACTTTTCCAGCAAGAAATATATCGAAGAGTTAGCGCCGGGCTAGCCG  
AAAATCTTAGTTTATCAGAAGCTTGGTCTAAAGTTCCCGAAAAATTAGCTTTTTTATGATTACATTGGTAATAATCCGGCA  
AAAGGGGGATTATTCCGAGCAGGTTCAATGGACAACGGGGATGGAATAGCTGTTGGATGGTTAGGACACCCCGTCTTTAA  
AGATAAAGAAGGGCGTGAGCTTTTTGTACGTGCTATGCCTACTTTTTTTGAAACATTTCCGGTAGTTTTGGTAGATGAAG  
ACGGAATTGTGAGAGCTGATGTTCTTTTAGAAGGGCAGAATCAAAGTATAGTGTGAACAAGTAGGTGTAACCTGTGGAG  
TTCTATGGGGGTGAACCTAATGGAGTAAGTTATTTCTGATCCTGCTACTGTGAAAAAATATGCTAGACGTGCACAATTAGG  
TGAAATTTTTGAATTAGATCGAGCTACTTTGAAATCCGATGGTGTTTTTTCGTAGTAGTCCGAGAGGTTGGTTCACTTTTG  
GGCATGCTACGTTTGTCTTTACTCTTTCTTTTTTTCGGACACATTTGGCATGGTGTCTAGAACCTTGTTCAGAGATGTTTTGCT  
GGTATTGATCCAGATTTGGATGCTCAAGTCAATTTGGAACATTTCAAAAA---  
CTTGGAGATCCAACCTACAAAGAGACAAGTA---GTC-----  
ATGAAAACCTTATATTCCCTGAGGAGGTTCTACCACGTGGAAACGCTCTTTAATGGAACCTTTAGCTTTAGCAGGTCGTGA  
CCAAGAAACCACCGGTTTCGCTTGGTGGGCCGGGAATGCCAGACTTATAAATTTATCTGGTAAACTACTTGGAGCTCACG  
TAGCCCATGCCGATTAATCGTATTCTGGGCCGGAGCAATGAACCTATTTGAAGTGGCTCATTTTCGTACCAGAAAAACCC  
ATGTATGAACAAGGATTAATTTTACTTCCGCACCTAGCTAC  
Vitis                   GTCGCTATTCTGGATCC---  
AGGGGGGAGTACGTTTCGATGGAATAATTTCTTAGATGTATTACCGCACCTCAGGGGTTAGGCCACTTTTTTACAGGTCA  
GTGGAATCTTTATGCTCAAAACCCTGATTCAAGTAGTCATTTATTTGGTACCTCTCAAGGAGCAGGAACTGCCATTCTAA  
CCCTTCTCGGGGATTCCATCCACAAACGCAAAGTTTTATGGCTGACTGATATTGCTCATCATCATTTAGCTATTGCATTT



ATTTTTCTCGTTGCTGGTCATATGTATAGAACTAACTTCGGGATTGGGCACAGTATGAAAGATCTTTTAGAAGCGCATAT  
TCCTCCGGGAGGACGATTGGGGCGTGGACATAAGGGTCTTTATGACACAATCAATAATTCGATTCATTTTCAATTAGGCC  
TTGCTCTAGCCTCTTTAGGGGTTATTACTTCTTTGGTAGCTCAACACATGTATTCTTTACCGGCTTATGCGTTCATAGCA  
CAAGACTTTACTACTCAAGCTGCGTTATATACTCATCACCAATACATCGCAGGATTCATCATGACAGGAGCTTTTGCTCA  
TGGAGCTATATTTTTTCATTAGAGATTACAATCCGGAGCAGAATGAGGATAATGTATTGGCAAGAATGTTAGACCATAAAG  
AAGCTATCATATCCCATTTAAGTTGGGCCAGCCTATTTTTGGGGTTCATACCTTGGGACTTTATGTTTATAATGATGTC  
ATGCTTGGCTTTGGTACTCCGGAGAAACAAATCTTGATTGAACCTATATTTGCTCAATGGATACAATCTGCTCACGGTAA  
AACTTCATATGGGTTTGATGTACTTTTATCTTCAACAACCTGGCCCCGATTCAATGCGGGGCGAAGCATATGGTTGCCTG  
GCTGGTAAATGCTGTAAATGAGAATAGTAATTCATTATTCTTAAACAATAGGTCCTGGAGACTTCTTGGTTCATCATGCT  
ATTGCTCTAGGTTTACATAACAACCTACATTGATCTTAGTAAAAGGCGCTTTAGATGCACGTGGTTCCAAGTTAATGCCAGA  
TAAAAAGGATTTTCGGTTATAGTTTTCTTGGCAGTGGTCCCAGGACGAGGCGGTACTTGTGATATTCGGCTTGGGACGCAT  
TTTATTTGGCAGTTTTCTGGATGTTAAATACTATTGGATGGGTACTTTTTTATTGGCATTGGAAGCACATCATTATGG  
CAGGGTAACGTTTTACAGTTAATGAATCTTCCACTTATTTGATGGGATGGTTAAGAGATTATCTATGGTTAAACTCTTC  
ACAACCTATCAATGGGTATAACCCTTTTGGTATGAATAGTTTATCAGTCTGGGCGTGGATGTTCTTATTTGGACATCTTG  
TTTGGGCTACTGGGTTTATGTTCTTAAATTTCTGGCGTGGATATTGGCAGGAATTGATTGAAACTTTAGCATGGGCTCAT  
GAACGCACACCTTTGGCCAATTTGATTGATGGAGAGATAAACCAGTGGCTCTTTCCATTGTGCAGGCAAGATTAGTTGG  
ATTAGCCCACTTTTCTGTAGGTTATATATTCACCTATGCGGCTTTCTTGATTGCCTCCACATCGGGCAAATTTGGT---  
ATGTCACATTGAGTAAAGATTTATGATACATGTATAGGGTGTACTCAATGTGTCCGTGCCTGCCCCACAGATGTATTAGA  
AATGATACCTTTGGGACGGATGTAAGCTAAGCAAATGCTTCTGCTCCAAGGACAGAAGACTGCGTCCGTTGTAAGAGAT  
GTGAATCTGCCTGTCCAACAGATTTCTTGAGTGTTCGGGTTATTTATGGCATGAAACAACCTCGCAGCATGGGTCTAGCT  
TAT---ATGATAACTCTTAAC---  
TTACCCTCTATTTTGGTGCCTTTAGTGGGCCTAGTATTTCCGGCAATTGCAATGGCTTCATTATTTCTTCATGTTCAAAA  
AAACAAGATTTTT---ATGCGAGATCTAAAAACATATCTTTCC---  
ACGGCACCGGTAAGTACTATATGGTTCGGGTCCTTAGCAGGTCTATTGATAGAGATTAATCGTTTATTCCCGGATGC  
GTTGACATTCCTTTTTTTAAT-----  
ATGACTGTAATTTAGAGAGACGCGAAAGCGAAAGCCTATGGGGTCGCTTCTGTAACCTGGATAACCAGCACTGAAAACCG  
TCTTTACATTGGATGGTTTGGTGTTTTGTATGATCCCGACCTTATTGACCGCAACTTCTGTATTTATTATCGCCTTCATTG  
CTGCCCTCCAGTAGATATTGATGGTATTCTGTGAACCTGTTTCTGGATCTCTACTTTATGGAAACAATATTATCTCTGGT  
GCCATTTCTTCTACTTCTGAGCTATAGGTTTGCACCTTTACCCAATATGGGAAGCAGCATCCGTTGATGAATGGTTATA  
CAATGGTGGTCTTATGAGCTAATTTGTTCTACACTTCTTACTTGGTGTAGCTTGTACATGGGTGCTGAGTGGGAACTTA  
GTTTCCGTCTGGGTATGCGTCTTGGATTGCTGTTGCATATTCAGCTCCTGTTGCAGCTGCTGCTGCTGTTTTCTTGATC  
TACCCAATTTGGTCAAGGAAGCTTTTTCTGATGGTATGCCTCTAGGAATCTCTGGTACTTTCAACTTCATGATTGTATTCCA  
GGCTGAGCACAACATCCTTATGCACCCATTCCACATGTTAGGCGTAGCTGGTGTATTTCGGCGGTTCCCTATTCAGTGCTA  
TGCATGGTTCCTTGGTAACCTCTAGTTTGTATCAGGGAAACCACAGAAAATGAATCTGCTAATGCAGGTTACAGATTCCGT  
CAAGAGGAAGAACTTATAATATTGTGGCTGCTCATGGTTATTTTGGCCGATTGATCTTCCAATATGCTAGTTTCAATAA  
TTCTCGTTCTTTACATTTCTTCTAGCTGCTTGGCCTGTAGTAGGTATCTGGTTCACTGCTTTAGGTATCAGCACTATGG  
CTTTCAACCTAAATGGTTTTCAATTTCAACCAATCTGTAGTTGATAGCCAAGGTCGTGTAATTAATACTTGGGCTGATATT  
ATCAACCGTGCTAACCTTGGTATGGAAGTTATGCATGAACGTAATGCTCATAATTTCCCTCTAGATCTA---  
GCTGCTGTTGAAGCTCCATCTATAAATGGA---  
ATGGGTTTGCCTTGGTATCGTGTTCATACTGTCGTATTGAATGATCCCGGTCGATTGATTTCTGTCCATATAATGCATAC  
AGCTCTGGTTGCTGGTTGGGCCGGTTCGATGGCTCTATATGAATTAGCAGTTTTTGTATCCCTCTGACCCCGTTCTTGATC  
CAATGTGGAGACAAGGTATGTTTGGTTATACCCTTCATGACTCGTTTAGGAATAACTAATTCATGGGGCGGTTGGAGTATC  
ACAGGCGGGACTATAACGAATCCGGGTATTTGGAGTTACGAAGGTGTGGCCGGGGCACATATTGTGTTTTCTGGCTTGTG  
CTTCTTAGCAGCTATCTGGCATTGGGTGTATTGGGATCTAGAAAATATTTGTGATGAACGTACAGGAAAACCTTCTTTGG  
ATTTGCCCAAGATCTTTGGAATTCATTTATTTCTATCAGGGTTGGCTTGCTTTGGTTTTGGCGCCTTTCATGTAACAGGC  
TTGTATGGTCTTGGAACTCTGGGTGTCGACCCTTATGGACTAATGGAAAAGTACAATCTGTAATCCAGCGTGGGGCGT  
GGAAGTTTTGATCCTTTTTGTTCCGGGAGGAATAGCCTCTCATCATATTGCAGCAGGTACATTTGGGCATATTAGCAGGCC  
TATTCATCTTAGTGTCCGTCCGCTCAACGTCTATACAAAGGATTACGTATGGGAAATATTGAAACCGTCTGTCCAGT  
AGTATTGCTGCTGCTTTTTTGCAGCTTTTGTGTTGCTGGAACCTATGGTATGGTTTCCAGCAACTACCCCGATCGAATT  
ATTTGGTCCCACTCGTTATCAATGGGATCAGGGATACTTCCAACAAGAAATATATCGAAGAGTTGGTGTGGGCTAGCCG  
AAAATCAAAGTTTATCAGAAGCTTGGTCTAAAATTCCTGAAAAATTAGCCTTTTATGATTACATCGGCAATAATCCGGCA  
AAAGGGGGATTATTAGAGCGGGTTCAATGGACAATGGGGATGGAATAGCTGTTGGATGGTTAGGACACCCTATCTTTAG  
AGATAAAGAAGGTCGTGAACCTTTTTGTACGTCGTATGCCTACCTTTTTTGAACATTTCCAGTCGTTTTGGTAGACGGAG  
ACGGAATTGTTAGAGCCGATGTTCTTTTCCAGAAGGGCAGAATCGAAGTATAGTGTGCAACAAGTAGGTGTAACCTGTTGAG  
TTCTATGGCGGCGAACTCAATGGAGTCAGTTATAGTATCTGCTACTGTGAAAAAATATGCTAGACGTGCTCAATTGGG  
TGAAATTTTTGAATTAGATCGTGCTACTTTGAAATCCGATGGTGTTTTTTCGTAGCAGTCCAAGGGGTTGGTTTTACTTTTG  
GACATGCTTCATTTGCTCTGCTCTTCTTCTTCGGACACATTTGGCATGGTGTAGAACCTTATTAGAGACGTTTTTGTCT

GGTATTGACCCGGATTTGGATGCTCAAGTGAATTTGGAACATTCCAAAA---  
CTTGGGGATCCAATAACAAGAAGACAAGTA---GTC-----  
ATGAAAACCTTATATTCCCTGAGGAGGTTCTACCCCGTGAAACGCTCTTTAATGGAACCTTTAGCTTTAGCTGGTTCGTGA  
CCAAGAAACCACCGGTTTCGCTTGGTGGGCCGGGAATGCCCGACTTATCAATTTATCCGGTAAACTACTTGGGGCTCATG  
TAGCCCATGCCGGATTAATCGTATTCTGGGCCGGAGCAATGAACCTATTTGAAGTGGCTCATTTTCGTACCAGAGAAGCCC  
ATGTATGAACAAGGATTAATTTTACTTCCCCACCTAGCTAC  
Yucca GTCGCTATTCCCGGATCC---  
AGGGGAGAGTACGTACAGATGGAATAATTTCTTAGACGTATTACCGTATCCCCAAGGGTTGGAACCGCTTCTTACGGGCCA  
GTGGAATCTTTATGCCAAAACCCTGATTCCAGTAGTCATTTGTTTGGTACCTCCCAAGGAGCGGGAACCTGCCATTCTAA  
CCCTTCTTGGGGGATTTTCATCCACAAACGCAAAGCTTATGGCTGACCGATATTGCTCATCATCATTTAGCTATTGCATT  
ATTTTTCTCGTTGCTGGTTCATATGTATAGAATACTTCGGGATTGGGCATAGTATCAAAGATCTTTTAGAAGCACACAC  
ACCTCCGGGGGCTCGATTAGGGCGTGGGCACAAGGGTCTTTATGACACAATCAATAAATTCGATTCAATTTCAATTAGGTC  
TTGCTCTAGCCTCTTTAGGGGTTATTACTTCTTAGTAGCTCAACACATGTAAGTCTTTACCTGCTTATGCATTATAGCA  
CAAGACTTTACTACTCAAGCTGCATTATATACTCATCACAATACATCGCAGGGTTCATCATGACAGGAGCCTTTGCTCA  
TGGAGCTATATTCTTTCATTAGAGATTATAATCCGGAGCAGAATGAGGATAATGTATTGGCAAGAATGTTAGACCATAAAG  
AAGCTATCATATCTCATTAAAGTTGGGCCAGCCTCTTTCTAGGGTTCATACCTTAGGTCTTTATGTTTACATAACGACGTC  
ATGCTCGCTTTTGGTACTCCGGAAAAACAAATCTTGATCGAACCTATATTTGCCCAATGGATACAATCCGCTCATGGTAA  
GACTTCATACGGGTTTCGATGTACTCTTATCTTCAACAACCTGGACCCGCATTCAATGCAGGTGCAAGCATATGGTTACCCG  
GCTGGTTAAATGCTATTAATGAAAATAATAATTCACCTTTCTTAAACAATAGGTCCGGGAGATTTCTTAGTTCATCATGCA  
ATTGCTCTAGGTTTGCATACAACCTACATTGATTTTAGTAAAAGGTGCTTTAGATGCACGTGGTTCCAAATTAATGCCAGA  
TAAAAAGGATTTTCGGTTATAGTTTTCTTGCACGGCCAGGACGTGGGGTACTTGTGATATTTCTGCTTGGGACGCGT  
TTTATTTGGCAGTTTTCTGGATGTTAAATACCATTGGATGGGTACCTTTTATTGGCATTGGAACACATCACATTATGG  
CAGGGTAACGTTTTCGCAATTTAATGAATCTTCCACTTATTTGATGGGGTGGTTAAGAGATTATCTATGGTTAAATTTCTT  
ACAACCTATCAATGGATATACCCCTTTTGGTATGAATAGTTTATCGGTATGGGCGTGGATGTTTTTATTTGGGCATCTTG  
TTTGGGCTACTGGATTTATGTTCTTAATTTCTGGCGGGGATATTGGCAAGAATTAATTGAAACTTTAGCATGGGCTCAT  
GAACGCACGCCTTTGGCTAATTTGATTTCGATGGAGAGATAAGCCAGTGGCTCTTTCCATTGTGCAAGCAAGATTGGTTGG  
ATTGGCACACTTTTCTGTAGGTTATATATTTACTTATGCAGCTTTCTTGATTGCCTCTACGTCAGGAAAATTTGGT---  
ATGTCACATTCAGTAAAAATTTATGATACATGTATAGGGTGTACTCAATGTGTACGAGCCTGCCCCACAGATGTATTGGA  
AATGATACCCTGGGACGGATGTAAGCTAAGCAAATGCTTCCGCGCCAAGAACCAGGACTGTGTAGGTTGTAAGAGAT  
GTGAATCCGCTTGTCCAACAGATTTTTTGGAGTGTCCGTGTTTATTTATGGCATGAAACAACCTCGCAGCATGGGTCTATCT  
TAT---ATGACAGATCTTAAC---  
TTACCCTCTATTTTTGTCCCTTTAGTGGGTCTAGTATTTCCGGCGATTGCAATGGCTTCTTTATTTCTTCATGTCCAAAA  
AAATAAGATTGTC---ATGCAAGATATAAAAAACATATCTTTCC---  
ACAGCACCTGTGCTAACTACTCTATGGTTTGGGTCTTTAGCGGGTCTATTGATAGAAATTAATCGTTTATTCCCAGATGC  
TTTGTCAATCCCTTTTTTTTTCATTCC---  
ATGACTGCAATTTTAGAGAGACGCGAAAGTACAAGCCTGTGGGGTTCGCTTCTGTAACCTGGATAACCAGCACCGAAAACCG  
TCTTTACATTGGATGGTTTGGTGTTTTGGATGATCCCTACCTTATTGACCGCAACTTCTGTATTTATTATCGCCTTCATTG  
CTGCTCCTCCAGTAGATATTGATGGTATTCGTGAACCTGTTTCTGGGTCTTTACTTTATGGAACAATATTATTTCTGGT  
GCCATTATTCCTACTTCTGCAGCTATAGGTTTGCATTTTTACCCGATATGGGAAGCAGCATCTGTTGATGAGTGGTTATA  
CAACGGCGGTCTTATGAGCTAATTGTTCTACACTTCTTACTTGGTGTAGCTTGTACATGGGTGCTGAATGGGAACCTTA  
GTTTCCGTCTGGGTATGCGTCTTGGATTGCTGTTGCATATTCAGCTCCTGTTGCAGCAGCTACTGCTGTTTTCTTGATC  
TATCCTATCGGTCAAGGAAGTTTCTCTGATGGTATGCCTTTAGGAATATCTGGTACTTTCAACTTCATGATTGTATTCCA  
GGCGGAGCACAACATCCTTATGCATCCATTTACATGTTAGGCGTAGCTGGTGTATTTCGGCGGCTCCCTATTTAGTGCTA  
TGCATGGTTCCTTGGTAACCTCTAGTTAATCAGGGAAACCCTGAAAACGAGTCTGCTAATGAAGGTTACAGATTCCGT  
CAAGAGGAAGAACTTATAATATCGTAGCTGCTCATGGTTATTTTGGCCGATTGATCTTCCAATACGCGAGTTTCAACAA  
TTCTCGTTCCCTACATTTCTTCTGGCTGCTTGGCCTGTTGTAGGTATCTGGTTCAGTCTTTAGGTATTAGTACTATGG  
CTTTCAACCTAAATGGTTTTCAATTTCAACCAATCTGTAGTTGATAGTCAAGGCCGTGTGATTAACACATGGGCTGATATC  
ATCAACCGTGTAACTTGGTATGGAAGTAATGCATGAACGTAATGCTCACAACCTCCCTCTAGACCTA---  
GCTGCTGTTGAAGTTCATCTACAAATGGA---  
ATGGGTTTGCCTTGGTATCGTGTTCATACTGTGCTATTGAATGATCCCGGTCGATTGCTTTCTGTCCATATAATGCATAC  
GGCTCTAGTTTTCGGGTTGGGCCGGTTCGATGGCTCTATACGAATTAGCGGTTTTTGGATCCCTCTGACCCCGTTCTTGATC  
CAATGTGGAGACAAGGTATGTTTGTATACCCTTCATGACTCGTTTAGGAATAACCAATTCGTGGGGTGGTTGGAGTATT  
TCAGGAGGAACATAACCAATCCGGGTATTTGGAGTTATGAAGGCGTGGCAGGGGCACATATTGTGTTTTCTGGCTTGTG  
CTTTTTGGCGGCCATCTGGCATTGGGTGTATTGGGACCTAGAAATATTCTGTGATGAACGTACGGGAAAACCCTCTTTGG  
ATTTGCCCAAGATCTTTGGAATTCATTTATTTCTTTTTCAGGGGTGGCTTGGTTTTGGTTTTGGCGCATTTTCATGTAACAGGC  
TTATATGGGCTGGAATATGGGTGTCCGATCCTTATGGACTAACTGAAAAGTACAATCTGTAAGTCCAGCGTGGGGCGC  
GGAAGTTTTGATCCTTTTGTTCAGGAGGAATCGCCTCTCATCATATTGCAGCAGGTACACTGGGCATATTAGCGGGCC

TATTCCATCTTAGTGTCCGTCGCGCTCAACGTCTATACAAAGGATTACGTATGGGCAATATTGAAACTGTACTTTCTAGT  
AGTATCGCTGCTGTTTTTTTTGCAGCTTTTGTGTTGCTGGAACATATGTGGTATGGTTCAGCAACTACCCCAATCGAGTT  
ATTTGGTCCCCTCGTTATCAGTGGGATCAGGGATACTTCCAGCAAGAAATATATCGAAGAGTTGGTGTGACTAGCCG  
AAAATCTGAGTTTATCGGAAGCTTGGTCTAAAATTCCCGAAAAATTAGCTTTTTATGATTACATTGGTAATAATCCGGCA  
AAAGGAGGATTATTCAGAGCGGGCTCAATGGACAGCGGAGATGGAATAGCTGTTGGATGGTTAGGACACCCCGTCTTTAG  
AGATAAAGAAGGGCGCGAACTTTTTGTACGTCGTATGCCTACTTTTTTTGAAACATTCCCGGTAGTTTTGGTAGATGGAG  
ACGGGATTGTGAGGGCAGATGTTCTTTTTCGAAGGGCGGAATCAAAGTATAGTGTGAACAAGTAGGTGTAACCGTTGAG  
TTCTATGGTGGCGAACTCAATGGAGTCAGTTATAGTGATCCTGCTACTGTGAAAAATATGCTAGACGTGCACAATTAGG  
TGAAATTTTTGAATTAGACCGGGCTACTTTGAAATCCGATGGTGTTTTTCGTAGCAGTCCAAGGGGTTGGTTCACTTTTG  
GGCATGCTACGTTTGTCTTGTCTTTTTCGGACATATTTGGCATGGCGCTAGAACCTTGTTTCAGAGATGTTTTTGTCT  
GTTATTGATCCAGATTGGATGCTCAGGTGGAATTTGGAGCATTCCAAAA---  
CTTGGAGATCCGACTACAAGGAGACAA-----

ATGAAAACCTTATATTCCCTGAGGAGGTTCTACCCCGTGAAACGCTCTTTAACGGAACTTTAGCTTTAGCTGGTTCGTGA  
CCAAGAAACCACCGGTTTTCGCTTGGTGGGCGGGGAATGCCAGACTTATTAATTTGTCCGGTAAACTACTCGGGGCTCAGG  
TAGCCCATGCCGATTAATCGTATTCTGGGCCGGGGAATGAACCTATTTGAAGTGGCTCATTTCGTACCCGAGAAACCC  
ATGTATGAACAAGGATTGATTTTACTTCCGCACCTAGCTAC

Zea

GTTGCTATTCCCGGATCCTCTAGGGGGGAGTACGTTTCGATGGAATAATTTCTTAGATGTATTACCCTATCCCAGGGGTT  
GGGTCCCCTTCTGACGGGTGAGTGAATCTTTATGCCAAAATCCTGATTTCAGTAATCATTATTTGGTACCCTCAAG  
GAGCGGAACTGCCATTCTGACCCTTCTGGGGGATTCCATCCACAAACACAAAGTTTGTGGCTGACCGATATTGCTCAT  
CATCATTTAGCTATTGCATTTATTTTTCTCATTGCCGGTCATATGTATCGAACTAACTTCGGAATTGGGCACAGTATCAA  
AGATCTTTTAGAAGCACATACTCCTCCGGGGGTCGATTAGGACGTGGGCATAAAGGCCTTTATGATACAATCAATAATT  
CGATTCATTTTCAATTAGGCCTTGTCTAGCTTCTTAGGGGTTATTACTTCTTAGTAGCTCAACATATGTACTCTTTA  
CCTGCTTATGCATTCATAGCACAAGACTTTACTACTCAAGCTGCTTTATATACTCATCACCATAATGCAGGGTTCAT  
CATGACAGGGGCTTTTGTCTCATGGAGCTATTTTTTTCATTAGGGATTACAATCCGGAACAGAATGAAGATAATGTATTGG  
CAAGAATGTTAGACCATAAGGAAGCTATCATATCTCATTAAAGTTGGGCTAGCCTCTTCTTAGGATTCCATACCTTGGGC  
CCTTATGTTTATAACGACGTTATGCTTGTCTTTGGTACTCCAGAAAAGCAAATCTTGATTGAACCTATATTTGCCCAATG  
GATACAATCTGTCTATGGTAAGACGACATATGGGTTTCGATATACTTATCTTCAACGAATGGCCCCCACTTTCAATGCAG  
GTCGAAACATATGGTTGCCCGGATGGTTGAATGCTGTTAATGAGAATAGTAATTTCGCTTTTCTTAACAATTAGGACCTGGG  
GATTTCTTGGTTCATCATGCTATTGCTCTAGGTTTGCATAACAACACTACATTGATTTTAGTAAAGGGTGTCTTTAGATGCAG  
CGGTTCCAAATTAATGCCGGATAAAAAGGATTTCCGGTATAGTTTTCTTGGCAGCGCCAGGGCGCGGGTACTTGTG  
ATATTTCTGCTTGGGACGCGTTTTATTTGGCAGTTTTCTGGATGTTAAATACCATTGGATGGGTTACTTTTTATTGGCAT  
TGGAAACACATTACATTATGGCAGGGCAACGTTTCCAAATTAATGAATCCTCCACTTATTTGATGGGATGGTTAAGAGA  
TTACCTATGGTTAAACTCTTCCAACTTATTAATGGATATAATCCTTTTGGGATGAATAGTTTATCAGTATGGGCTTGGGA  
TGTTCTTATTTGGACATCTTGTGTTGGGCTACAGGATTTATGTTCTTAATTTCTGGCGTGGATATTGGCAGGAATTAATT  
GAGACTTTAGCATGGGCTCATGAACGGACACCTTTGGCTAATTTAATTCGCTGGAGAGATAAGCCCGTGGCTCTTTCCGT  
TGTGCAAGCAAGATTGGTCCGATTAGCCCACTTTTCCGTGGGTTATATATTCACTTATGCAGCTTTCTTGATTGCCTCAA  
CATCAGGCAAGTTCGGT---

ATGTCACATTCTGTAATAATTTATGATACATGTATAGGATGCACCTCATTGTGTACGAGCTTGCCCAACAGATGTATTAGA  
AATGATACCTTGGGATGGATGTAAGCCAAGCAAATTGCTTCCGCGCCGAGAACCAGGATTGTGTGGGTTGTAAGAGAT  
GCGAATCCGCTGTCCAACGGATTTTTTAAGTGTCCGCTTTATTTAGGGCCTGAAACAACCCGCAGCATGGCTCTATCT  
TAT-----

TTACCCTCTATTTTCGTACCTTTAGTAGGCTTAGTATTTCCGGCAATTGCAATGACTTCCCTATTTCTTTATGTGCAGAA  
AAATAAGATTGTC---ATGCGGGATATAAAAACATATCTCTCT---

GTAGCACCCGTGCTAAGTACTCTATGGTTTGGGGCTTTAGCAGGTTTATTGATAGAAATCAATCGTTTTATTCCCAGATGC  
TTTGTCTATCCCTTTTTTT-----

ATGACTGCAATTTTAGAGAGACGCGAAAGTACAAGCCTGTGGGGTCGCTTCTGCAACTGGATAACTAGCACCGAAAACCG  
TCTTTACATTGGATGGTTCCGTTGTTTTGATGATCCCTACCTTATTGACCGCAACTTCCGTATTTATTATCGCCTTCATCG  
CTGCTCCTCCAGTAGATATTGATGGTATTCTGTGAGCCTGTTTCTGGTTCTTTACTTTATGGAAACAATATTATCTCTGGT  
GCTATTATTCCTACTTCTGCGGCGATAGGGTTGCATTTTTACCCAATTTGGGAAGCTGCATCTGTTGATGAATGGTTATA  
CAATGGCGGTCCTTATGAGCTAATTGTTCTACACTTCTTACTTGGTGTAGCTTGTATATGGGTGCTGAGTGGGAACCTTA  
GTTTCCGTCTGGGATGCGCCCTTGGATTGCTGTTGCATATTCAGCTCCTGTTGCAGCTGCTACTGCTGTTTTCTTGATT  
TACCCTATTGGTCAAGGAAGTTTCTCTGATGGTATGCCTTTAGGAATATCTGGTACTTTCAACTTTATGATTGTATTCCA  
GGCAGAGCACAACATCCTTATGCATCCATTTACATGTTAGGTGTAGCTGGTGTATTTCGGCGGTTCCCTATTAGTGCTA  
TGCATGGTTCCCTTGTAACCTCTAGTTTGTATCAGGGAAACCACTGAAAATGAGTCTGCTAATGAGGGTTACAAATTTGGT  
CAGGAAGAAGAGACTTATAATATTGTGGCTGCTCACGGTTATTTTGGTGCATTAATCTTCCAATATGCTAGTTTCAACAA  
TTCTCGTTCTTTACACTTCTTCTTGGCTGCTTGGCCTGTAGTAGGGATCTGGTTCAGTCTTTAGGTATTAGTACTATGG

CATTCAACCTAAATGGTTTTCAATTTCAACCAATCTGTAGTTGATAGCCAAGGTCGCGTTATTAATACTTGGGCTGATATC  
ATCAACCGTGCTAATCTTGGTATGGAGGTAATGCACGAACGTAATGCTCACAACCTCCCTCTAGACCTA---  
GCTGCTCTTGAAGTTCCTTACCTTAATGGA---  
ATGGGTTTGCCTTGGTATCGTGTTCCATACTGTCGTATTGAATGATCCGGGTCGATTGCTTTTCGGTGCATATAATGCACAC  
AGCTCTAGTTTTCTGGTTGGGCTGGTTTCGATGGCTTTTATACGAATTAGCGGTTTTTGGATCCCTCTGATCCTGTTCTGGATC  
CAATGTGGAGACAAGGTATGTTTCGTCATCCCCTTCATGACTCGTTTAGGAATAACGAATTCGTGGGGTGGTTGGAGTATT  
TCAGGAGGAAGTGAACGAATCCGGGTATTTGGAGTTATGAAGGTGTGGCAGGTGCGCATATTGTGTTTTCTGGCTTGTG  
TTTTCTGGCAGCTATCTGGCATTGGGTATATTGGGACCTAGAAAATATTCTGTGATGAGCGGACGGGAAAACCTTCTTTGG  
ATTTGCCCAAGATCTTTGGAATTCATTTATTTCTTGCAGGGGTGGCTTGTTTTGGCTTTGGTGCATTTTCATGTAACGGGT  
TTATATGGCCCTGGGATATGGGTGTCGGATCCTTACGGACTCACTGGAAAAGTACAAGCTGTAAATCCTGCGTGGGGTGC  
AGAAGTTTTGATCCTTTTCGTTCCGGGAGGAATAGCTTCGCATCATATTGCTGCGGGTACTTTGGGCATATTAGCGGGCC  
TATTCCATCTAAGTGTCCGTCGCTCCGCTCAACGCTATACAAAGGGTTACGTATGGGCAATATTGAAACTGTACTTTCCAGT  
AGTATCGTCTGTTTTTTTTGCTGCTTTTCGTAGTTGCCGGAACATATGGTATGGATCAGCAACTACCCCAATCGAATT  
ATTTGGGCTACTCGTTATCAGTGGGATCAGGGATACTTTTCAGCAAGAAATATATCGAAGAGTTAGCGATGGGTTAGCCG  
AAAATCTTAGTTTTATCAGAAGCTTGGTCTAAAATTTCCCGAAAATTTAGCCTTTTATGATTATATTGGTAATAATCCGGCA  
AAGGGGGGATTATTTCAGAGCAGGCTCAATGGACAATGGGGATGGCATAGCTGTTGGATGGTTAGGACATCCCGTCTTTAG  
AGATAAAGAAGGACGCGAGCTTTTTGTACGTCGTATGCCTACTTTTTTTGAAACATTTCCGGTCTTTTTGGTAGATGAAG  
AGGGAATTTGTGAGAGCGGACGTTCCTTTTAGAAGAGCAGAATCCAAATATAGTGTGAACAAGTAGGCGTAACGGTGGAG  
TTCTATGGTGGCGAACTTAATGGAGTAAGTTATTCTGATCCTGCTACTGTAAAAAATATGCGCGGCGTGTCTCAATTAGG  
GGAAATTTTTGAATTAGATCGAGCTACTTTGAAATCAGATGGTGTTTTTTCGCAGCAGTCCAAGGGGTTGGTTCACTTTTG  
GTCATGCTACCTTTGCTTTGCTCTTCTTTTTTCGGACACATTTGGCATGGCGCTCGAACCTTGTTCGAGATGTTTTTGT  
GGTATTGATCCAGACTTGGATGCTCAAGTGAATTTGGAACATTTCCAAAAA---  
GTTGGAGATCCAACCTACAAGGAGACAGGCA---GCC-----  
ATGAAAATCTTATATTCCCTGAGGAGGTTCTACCACGTGGAAACGCTCTTTAATGGAACCTTTTCGTTTTAGCTGGTCTGTA  
CCAAGAAACCACCGGCTTTCCCTTGGTGGGCTGGGAATGCCAGACTTATCAATTTGTCCGGTAAACTACTTGGAGCTCATG  
TAGCCCATGCCGATTAATCGTATTCTGGGCCGGAGCAATGAACCTATTTGAAGTGGCCATTTTCGTACCAGAAAAGCCC  
ATGTATGAACAAGGGTTGATTTTACTTCCGCACTTAGCTAC

Acorus

TCTAGGTTGGGGGTAGGTCCGGGTGGGGAAGTTATAGACACCTTTCCATACTTTGTATCTGGAGTACTTTCATCTAATTT  
CCTCTGCAGTCTTAGGCTTTGGCGGTATTTATCATGCGCTTCTTGGACCTGAGACTCTAGAAGAATCCTTTCCGTTCTTC  
GGTTATGTATGGAAAGATAGAAATAAAATGACCACAATTTTAGGTATTCATCTAATTTTGTAGGGATAGGTGCTTTTCT  
TCTAGTATTCAAGGCTCTTTATTTTGGGGGTGTATATGACACCTGGGCTCCTGGGGGGG--GGAGATG---  
TAAGAAAAATAACCAACTTAACACT-  
AGCCCAAGTGTTATATTTGGTTATTTACTAAAATCTCCCTTTGGAGGAGAAGGATGGATTGTTAGTGTGGACGATTTAGA  
AGATATAATTGGAGGACATGTATGGTTAGGTTCC---  
ATTTGTATACTTGGTGGAACTCTGGCATATCTTGACCAAACCCTTTGCATGGGCTCGCCGCGCATTTGTATGGTCTGGAGA  
GGCTTACTTGTCTTATAGTTTGGTGTCTTTAGCTGTCTTTGGGTTTCATCGCTTGTGTTTTCGTCTGGTTCAATAATACCG  
CCTATCCTAGTGAATTTTATGGACCTACTGGGCCGGAGGCTTCTCAAGCTCAAGCATTACTTTTCTAGTTAGAGACCAA  
CGTCTTGGGGCTAACGTGGGATCCGCTCAGGGACCTACTGGTTTAGGTAAATATCTAATGCGGTCCCCAACGGGAGAGGT  
CATTTTTGGAGGAGAAACCATGCGCTTTTGGGATCTCCGTGCTCCTTGGTTGGAACCTCTAAGGGGTCCCAATGGTTTGG  
ACTTGAGTAGGCTGAAAAAAGACATACAA---  
CCTTGGCAAGAACGACGTTTCGGCGGAATATATGACTCATGCTCCTTTAGGGTCTTTAAATTCGGTGGGTGGTGTAGCTAC  
CGAGATCAATGCAGTCAATTATGTCTCTCCTAGAAGTTGGTTAGCTACTTCTCATTGTTCTAGGATTCTTCTTTTTTG  
TGGGTCATTTGTGGCACGCAGGAAGAGCCCGCGCAGCGGCAGGATTTGAAAAAGGAATCGATCGTGATTTAGAACCT  
GTTCTTTCCATGACTCCTCTTAAT-----  
ATGACTATAGCCCTTGGTAGATTTACCAAAGAGGAA-----  
AATGATTTATTCGATATTATGGACGACTGGTTACGGAGAGACCGTTTTCGTTTTTGTAGGTTGGTCCGGTCTATTGCTCTT  
CCCTTGTGCTTATTTTCGCTTTAGGAGGTTGGTTACAGGTACAACTTTTGTAACCTTCGTGGTATACCCACGGATTGGCTA  
GTTTCATATTTAGAAGGCTGCAATTTCTTAACCGCTGCAGTTTCTACTCCTGCTAATAGTTTACGACATTCTTTGTTGCTA  
CTATGGGGTCTGAAAGCACAAGGCGATTTTACTCGTTGGTGTCAATTAGGCGGTCTGTGGACTTTTGTGCTCTACACGG  
TGCTTTTCGGACTAATCGGTTTCATGTTACGTCAATTCGAACCTTGCTCGATCTGTTCAATTGCGACCTTATAATGCAATCG  
CATTTTCTGGTCCAATTGCTGTTTTTCGTTTTCTGTATTCTTAATTTATCCACTGGGTGAGTCTGGTTGGTTCTTTGCACCC  
AGTTTTGGTGTGGCAGCTATATTTTCGATTCTCCTCTTCTTCCAGGGGTTTTATAATTGGACCCTAAACCCATTTTCATAT  
GATGGGAGTTGCCGAGTATTGGGTGCTGCTCTGCTATGCGCTATTTCATGGTGTACCGTAGAAAATACTTTATTTGAGG  
ACGGTGACGGCGCAAATACATTCGTTGTTTTAACCCAACGCAAGCCGAAGAGACTTATTCGATGGTCACTGCTAACCGA  
TTTTGGTCCCAATCTTTGGGGTTGCTTTTTCTAATAAACGTTGGTTACATTTCTTTATGTTATTTGTACCAGTAACCGG

TTTATGGATGAGTGCCCTTGGAGTAGTTGGTCTGGCTCTGAACCTACGTGCCTATGACTTCGTTTTCCAGGAAATCCGTG  
CCGCGGAAGATCCTGAATTTGAGACTTTCTACACCAAAAATATTCTCTTAAATGAGGGTATTTCGTGCTTGGATGCGAGCT  
CAGGATCAGCCTCATGAAAACCTTATATTCCCTGAGGAGTTCTACCCCGTGGAAACGCTCTT---  
ATGTCTGGAAGCACGGGAGAACGCTCTTTTGGCTGATATTATTACCAGTATTTCGATACTGGGTTATTTCATAGCATTACTAT  
ACCTTCCCTATTTCATTGCGGGTTGGTTATTTCGTCAGTACAGGTTTAGCTTACGATGTGTTTTGGAAGTCCTCGTCCAAACG  
AGTATTTTACAGAAAGCCGGCAAGGGATTCCATTAATAACTGGCCGTTTTGATCCTTTGGACCAACTTGATGAATTTAGT  
AGATCCTTT---  
ATGACCATAGATCGAACCTATCCAATTTTTACAGTAAGATGGTTGGCTGTTTCATGGACTAGCTGTACCTACCGTTTTCTTT  
TTTGGGGTCAATATCAGCAATGCAGTTCATCCAACGA-----  
ATGGCTACACAAACCCTTGAGGGTAGT---TCT---AGATCTGGG-----  
CCAAGACGAACAATTGTAGGGGATTTATTGAAACCATTGAATTCAGAATATGGTAAAGTAGCCCCGGGATGGGGAACTAC  
TCCTTTTATGGGAGTGCCAATGGCCCTATTTGCGATATTCTATGTATTATTTTGGAGATTTATAATTCTTCCGTTTTAC  
TGGATGGAGTTTACCAGAAAT-----  
GGAGATTGTGTAATGCTTACTCTCAAACCTCTTCGTTTACACAGTAGTGATATTTTTTGTCTCTATTTATCTTCCGATT  
CCTATCTAATGATCCAGGACGTAATCCTGGA---CGTGAGGAA-----  
ATGGCTGATACTACTGGAAGGATTCTCTTTGGCTGATAGGTACTGTAGCTGGTATTCTGTGATCGGTTTCAGTGGGTGT  
TTTCTTTTACGGTTCATATTCCGGATTGGGCTCATCTCTG-----ATGCTT-----  
AATATACTTAATTTGATCTGTATCTGTCTTAATTCTGCCCT---TATTCG-----  
AGTAGTTTTTCTGCGCTAAATTGCCCGAGGCTTATGCTGTTTTCAATCCAATTGTAGATTTTTATGCCAGTCATACCTGT  
ACTCTTTTTTCTCTTAGCCTTTGTTTGGCAAGCCGCTGTAAGTTTTCGA---ATGACACAATCA-----  
AACCCAAACGAACAAAATGTTGAATTGAATCGTACCAGTCTATACTGGGGTTATTACTCATTTTTGTACTTGTGTTTT  
ATTTTCCAATTATTTCTTCAAT---ATG---  
GAAGTAAATATTCTCGCATTATTGCTACTGCCTGTTTATTCTAGTTCGACTGCCTTTTTACTTATCATCTACGTAAA  
AACAGTCAGTCAAAAT-----GAT-----  
ATGGAAACAGCAACCTTAGTCGCCATCTTCATATCTGGTTTACTTGTAAAGCTTTACTGGGTATGCCTTATATACCGCTTT  
TGGGCAA---CCCTCTCAACAATAAGAGATCCATTTCGAGGAACACGGAGAC---  
ATGGAAAGCATTGGTTTTATACATTCTGTAGTCTCGACTCTAGGGATAATTTTTTTCGCTATCTTCTTTTCGAGAACCGCC  
AAAGGTTCTT-----ACTAAAAAGATGAAA---  
ATGACTATTGCTTTTTCAATTGGCTATTTTTGCAATTAATTGCGACTTCATCGATCTTATTGATTAGTGTACCCGTTGTATT  
TGCTTCTCTGATGGTTGGTCAAGTAACAAAATGTTGTATTTTCCGGTACCTCATTATGGATTGGGTTAGTCTTTCTGG  
TAGGTATCCTTAATTCGCTCATCTCT---  
ATGTCACCACAAACAGAGACTAAAGCAGGTGTTGGATTCAAAGCTGGTGTAAAGATTACAAATTGACTTATTATACTCC  
TGAATATGAAACCAAAGATACTGATATCTTGGCAGCATTTCGAGTAACCTCCTCAACCCGGAGTTCCACCCGAGGAAGCAG  
GGGCTGCGGTAGCTGCCGAATCCTCTACTGGTACATGGACAACGTGTGGACCGATGGACTTACCAGCCTTGATCGTTAC  
AAAGGCCGATGCTACCACATCGAGCCCGTTGTTGGGGAGCAAAATCAATATATTGCTTATGTAGCTTATCCTTTAGACCT  
TTTTGAAGAAGGTTCTGTTACTAACATGTTTACTTCCATTGTGGGTAATGTATTTGGGTTCAAAGCCCTACGAGCTCTAC  
GTTTGGAGGATCTTTCGAATTTCCCTGCTTATTCCAAAACCTTTCCAAGGCCCGCCCATGGAATCCAGGTTGAGAGAGAT  
AAATTGAACAAGTATGGTCTGCCCTATTGGGATGTACTATTAACCAAATTTGGGGTTATCCGCGAAGAACTACGGTAG  
AGCAGTTTATGAATGTCTCCGTGGTGGACTTGATTTTACCAAGGATGATGAGAACGTGAACTCACAGCCATTTATGCGTT  
GGAGAGACCGTTTTCTTATTTTGTGCTGAAGCAATTTATAAAGCGCAAGCGGAAACAGGTGAAATCAAA-----  
GGACATTATTTGAATGCTACTGCGGGTACATGTGAAGAAATGATGAGAAGGGCCCAATGTGCCAGAGAATTGGGAGTTCC  
TATCGTAATGCATGACTACTTAACAGGTGGATTCACTGCAAATACTAGCTTGGCTATTTATTGCCGAAACAACGGCCTAC  
TTCTTACATCCATCGTGAATGCATGCAGTTATTGATAGACAGAAGAATCATGGTATGCACCTTC  
Amborella  
TCTAGGTTGGGGGTAGGTCCTGGGGGGGAAGTTATAGACACCTTTCCATACTTTGTATCTGGAGTACTTCATTTAATTT  
CCTCTGCAGTCCTAGGCTTTGGTGGTATTTATCATGCACTTCTTGGACCTGAGACTCTTGAAGAATCCTTTCCATTCTTC  
GGTTATGTATGAAAAGATAGAAAATAAATGACCACTATTTTGGGTATTCACTTAATTTTTATTAGGTGTAGGCGCTTTTCT  
CCTAGTGTTCGAAGGCTCTTTATTTTGGAGGCGTATATGATACCTGGGCCCCCGGTGGC---GGAGATG---  
TAAGAAAAATAACCAACCTGACACTTAGCCCAAGTGTTATATTTGGTTATTTGCTAAAATCTCCTTTTGGGGGAGAAGGA  
TGGATTGTTAGTGTGGATGATTTAGAAGATATAATTGGAGGACACGTATGGTTAGGTTTC---  
ATTTGTATACTTGGTGAATATGGCATACTTAAACCAAACCTTTTGCCTGGGCTCGCCGCGCATTTGTATGGTCTGGAGA  
AGCTTACTTGTCTTATAGTTTTGGGGGCTTTATCTATCTTTGGTTTTATTGCTTGTCTGTTTTCGTCTGGTTCAATAATACGG  
CTTATCCTAGTGAATTTACGGTCTACCGGCCCAGAAGCTTCTCAAGCTCAAGCGTTTACTTTTCTAGTTAGAGACCAA  
CGTCTTGGGGCTAACGTAGGATCTGCTCAAGGACCCACCGGTTTAGGTAAATATCTAATGCGTTCTCCAACCTGGGGAGGT  
CATTTTTGGAGGAGAACTATGCGCTTCTGGGATCTCCGTGCTCCCTGGTTGGAACCACTAAGGGGTCCCAACGGTTTGG  
ACTTGAGTAGGCTGAAAAAAGACATACAG---  
CCCTGGCAAGAACGACGTTTCGGCGGAATATATGACTCATGCTCCTTTAGGTTCTTTAAATTCCTGGGCGGCGTAGCTAC

AGAGATCAATGCAGTCAATTATGTCTCTCCCAGAAGTTGGTTAGCTACCTCTCATTGTTCTAGGATTTTTTCTATTTCG  
TGGGTCAATTTGTGGCATGCAGGAAGGGCCCGTGCAGCTGCAGCAGGATTTGAAAAAGGAATCGATCGTGATTTTGAACCT  
GTTCTTTCCATGACTCCTCTTAAC-----  
ATGACTATAGCCCTTGGTAGGTTTTCCAAAGAGGAA-----  
AATGATTTATTTGATATTATGGATGACTGGCTACGGAGGGACCGCTTCGTTTTTGTAGGTTGGTCTGGTCTATTGCTTTT  
TCCTTGTGCCTATTTTGGCTTTAGGAGGGTGGTTCACAGGTACAACCTTTGTAACCTTCATGGTACACCCATGGATTAGCTA  
GCTCCTATTTGGAAGGATGCAATTTTTAACCGCTGCAGTTTCTACTCCTGCTAATAGTTTAGCACATTCTTTGTTGTTA  
CTGTGGGGTCTGAAGCACAAGGAGATTTACTCGTTGGTGTCAATTGGGGGTCTGTGGACTTTTGTGCTCTCCATGG  
TGCTTTCCGACTAATAGGTTTCATGTTGCGTCAATTCGAACCTGCTCGATCTGTTCAATTGCGACCTTATAACGCAATCG  
CATTCTCCGCTCCAATTGCTGTTTTGTTTTCTGTATTCTGATTTATCCACTAGGTCAGTCTGGTTGGTTCTTTGCACCG  
AGTTTTCCGTTGTAGCAGCTATATTTGATTCACTTCTCTTCCAAAGGATTTATAATTGGACGTTGAATCCATTTTCATAT  
GATGGGAGTTGCTGGAGTATTGGGTGCTGCTCTGCTATGCGCTATTCATGGTGTACTACCGTAGAAAATACTTTATTTGAAG  
ATGGTGATGGTGCAAATACATTCCGTGCTTTTTAACCCAACCTCAAGCTGAAGAGACTTATTCGATGGTCACTGCTAACCGC  
TTTTGGTCCCAAATCTTTGGGGTTGCTTTTTCCAATAAACGTTGGTTACATTTCTTTATGTTATTTGTACCAGTAACCGG  
TTTATGGATGAGTGCTCTTGGAGTAGTCGGTCTGGCTTTGAACCTACGTGCCTATGACTTCGTTTTCCCAAGAAATCCGTG  
CAGCGGAAGATCCTGAATTTGAGACTTTCTATACCAAAAATATTCTCTTAAACGAAGGTATTTCGTGCTTGGATGGCGGT  
CAGGATCAGCCCCATGAAAACCTTATATTCCCTGAGGAGGTTCTACCCCGTGGAAACGCTCTT---  
ATGTCTGGAAGTACGGGAGAACGTTCTTTTGGCTGATATTATTACCAGTATTCGATACTGGGTCACTCATAGCATTACTAT  
ACCTTCCCTATTCATTGCAGGTTGGTTATTTCGTGAGCACAGGCTTAGCTTACGATGTGTTTGAAGCCCTCGACCGAACG  
AGTATTTACAGAGAGCCGACAAGGGATTCCATTAATAACTGGCCGTTTCGATTCAATTGGAACAACCTTGATGAATTTAGT  
AGATCCTT---  
ATGACCATAGATAGAACCTATCCGATTTTTACAGTGAGATGGTTGGCTGTTACCGACTAGCTGTACCTACAGTTTTTTTT  
CTTGGGGTCAATATCAGCAATGCAGTTCATCCAACGA-----  
ATGGTTACACAAAGCGTGGAGGATAGT---TCC---AGATCTGGT-----  
CCAAGACGGACTATTGTAGGGGATTTATTGAAACCGTTGAATTCAGAATATGGTAAAGTAGCTCCTGGATGGGGAACTAC  
CCCCTTTATGGGGTTCGCAATGGCTCTATTTGCAATATTTCTATCAATATTTTGGAGATTTATAATTCTTCCGTTTTAC  
TGGATGGAATCTCAGTGAGT-----  
ATGCTTACTCTCAAACCTGTTTCGTTTACACAGTAGTGATATTCTTTGTTTTCTCTATTCAATTTTTGGATTCTATCTAATGA  
CCAGGACGTAATCCTGGG---CGTGACGAA-----  
ATGGCCGATACTACCGGAAGGATTCCTCTTTGGCTGATAGGTAAGTACTGTAACCTGGTATTCTGTGATCGGTTCAATGGGCAT  
TTTTCTTCTATGATCATATTCCGGATTGGGCTCATCCCTG-----ATGCCT-----  
AATATCTTCAGTTTGATCTGTATCTGTCTTCATTCTGCCCTT---CATTG-----  
AGTGGTTTTTTCTTCGCAAACTGCCGAGGCCTATGCTGTTTTCAATCCAATCGTAGATGTTATGCCGGTCATACCTTT  
GTTCTTTTTTCTCTTAGCCTTTGTTTGGCAAGCTGCTGCAAGTTTTCGA---ACGACACAATCA-----  
AACCCAAACGAACAAAATGTTGAATTGAATCGTACCAGTCTCTACTGGGGGTTATTACTCATTTTTTGTACTTGTGTTTC  
ATTTTCCAATATTTCTTCAAT---ATG---  
GAAGTAAATATCCTCGCATTTATTGCTACTGCAGTGTTCATTCTAGTTTCTACTGCTTTTCTACTTATCATTTACGTA  
AACAGTCACTCAAAGTGTT-----GAA-----  
ATGGAAACTGCAACCCTAGTTGCCATCTCCATATCTGGTTCACTTGTAAAGCTTTACTGGGTATGCCTTATATACCGCCTT  
TGGGCAA---CCCTCTCAACAACCTAAGAGATCCATTGAGGAACATGGGGAC---  
ATGGAAGCACTGGTTTATACATTCCTGTTGGTATCGACTCTAGGGATAATTTTTTTTCGCTATCTTTTTTCGAGAACC  
TAAGGTTCCG-----  
ATGACTATTGCTTTCCAATTGGCTGTTTTTGCATTAATTGCTACTTTCATCAATCTTACTGATTAGTGTACCCGTTGTATT  
TGCTTCTTCTGATGGTTGGTCAAGTAACAAAAATATTGATTTTTCGGGTACATCATTATGGATTGGATTAGTCTTTTTTGG  
TAGCTATCCTTAATCTCTCATCTCT---  
ATGTCACAAAAACAGAGACTAAAGCAAGCGCTGGATTCAAAGCCGGTGTAAAGATTACAGATTGACTTATTATACTCC  
TGACTATGAAACCCCTAGCTACTGATATCTTGGCAGCATTCCGAGTAACTCCTCAACCTGGAGTTCCACCTGAGGAAGCAG  
GAGCTGCAGTAGCTGCCGAATCTTCCACTGGTACATGGACAACCTGTGTGGACCGATGGACTTACCAGCCTTGATCGTTAC  
AAAGGTGATGCTACCACATCGAACCCGTTGCTGGGGAAGAAAATCAATATATTGCTTATGTAGCTTATCCTTTGGACCT  
TTTTGAGGAAGGTTCTGTTACTAACATGTTTACTTCCATCGTAGGTAATGTATTTGGGTTCAAAGCCCTACGAGCTCTAC  
GTCTAGAGGATCTGCGAATTCCTCCTGCTTATTCCAAAAGTTTTCCAAGGCCACCTCATGGCATCCAAGTCGAGAGAGAT  
AAATTGAACAAGTATGGTTCCTCCCTATTAGGATGTACTATTAACCAAAAATTTGGGGTTATCTGCCAAAAACTACGGTAG  
AGCGGTTTTATGAATGTCTCCGTGGTGGGCTTGATTTTTACCAAGGATGATGAGAATGTGAACTCCCAACCATTTATGCGTT  
GGAGGGACCGTTTTCTTATTTTGTGCCGAAGCTCTTTATAAAGCACAGGCAGAAACAGGTGAAATCAA-----  
GGACATTACTTGAATGCTACTGCAGGTACATGCGAAGAAATGATGAAAAGGGCCGATTTGCCAGAGAATTGGGAGTTCC  
TATCGTAATGCATGACTACTTAAACAGGAGGATTCAGTCAAATACTAGTTTGGCCATTATTGCCGAGACAATGGCCTAC  
TTCTTACATTCATCGCGCAATGCATGCAGTTATTGATAGACAAAGGAATCATGGTATACACTTTC

Arabidopsis

TTTAGGATGGGGGGTAGGTCCTGGGGGAGAAGTTATAGACACCTTTCCGTACTTTGTATCTGGAGTACTTCACTTAATTT  
CTTCTGCAGTTTTGGGCTTTGGCGGTATTTATCATGCACTTCTGGGACCCGAAACTCTTGAAGAATCTTTTCCCTTTTTC  
GGTTATGTATGGAAAGATAGAAATAAAATGACCACCATTTTGGGTATTCACTTAATTTTTGTTAGGTGTAGGTGCCTTTCT  
TCTAGTATTCAAGGCTCTCTATTTTTGGGGGCGTATATGATACCTGGGCTCCGGGAGGG---GGGGATG---  
TAAGAAAAATTACAACTTGACTCTTAGCCCAAGTGTTATATTTGGTTATTTACTAAAATCTCCCTTTGGGGGAGAAGGA  
TGGATTGTTAGTGTGGACGATTTGGAAGATATAATTGGAGGACATGTATGGTTAGGTTCC---  
ATTTGTATATTTGGTGGAACTGGCATATCTTAACCAAGCCTTTTGCATGGGCTCGCCGCGCACTTGTATGGTCTGGGGA  
GGCTTACTTGTCTTATAGTTTAGCTGCTTTATCTGTTTGTGGTTTCATTGCTTGTGTGTTTGTCTGGTTAATAATACCG  
CTTACCCTAGTGAGTTTTACGGACCTACGGGGCCAGAAGCTTCTCAAGCTCAAGCATTACTTTTCTAGTTAGAGACCAA  
CGTCTTGGAGCTAACGTGGGGTCTGCTCAAGGACCTACAGGTTTAGGTAAATACTTAATGCGTTCTCCGACTGGAGAAGT  
TATTTTTGGAGGAGAAACAATGCGTTTTTGGGATCTGCGTCTCCCTGGTTAGAACCTTTAAGGGGTCTAACGGTTTTGG  
ACTTGAGTAGGTTGAAAAAAGACATACAA---  
CCTTGGCAAGAACGACGTTCCGGCAGAATATATGACTCATGCTCCTTTAGGTTGCTTAAATCTGTAGGGGGCGTAGCTAC  
TGAGATCAATGCAGTCAATTATGTCTCTCCGAGAAGTTGGTTATCTACCTCTCATTGTTCTAGGATTTTTTCTATTTCG  
TGGGTCATTTATGGCACGCGGGAAGGGCTCGGGCAGCGGCAGCGGGATTTGAAAAGGAATTGATCGTGATTTTGAACCT  
GTTCTTTCCATGACTCCTCTTAAC-----  
ATGACTATAGCCCTTGGTAAATTTACCAAAGACGAA-----  
AAAGATTTATTTGATATTATGGATGACTGGTTACGGAGGGACCGCTTCGTTTTTGTAGGTTGGTCTGGTCTATTGCTCTT  
TCCTTGTGCCTATTTTCGCTTTAGGGGTTGGTTACAGGTACAACCTTTGTAACCTTCATGGTATACTCATGGATTGGCCA  
GTTCTTATTTAGAAGTTGCAATTTTTAACCCTGCAGTTTCTACTCCTGCTAATAGTTTAGCGCATTCTTTGTTGTTA  
CTGTGGGGTCTGAAGCACAAAGGAGATTTACTCGTTGGTGTCAATTAGGTGGTCTATGGGCTTTTGTGCTCTCCACGG  
CGCTTTCGCATTAATAGGTTTTATGTTACGTCAATTTGAACCTTGCTCGATCTGTTCAATTGCGACCTTATAATGCAATCG  
CATTCTCTGGTCCCATTGCTGTTTTTGTGTTCTGTCTTCCATAATTTATCCACTAGGTCAATCTGGTTGGTTCTTTGCGCCT  
AGTTTTGGTGTAGCGGCTATATTTTCGATTCATCCTCTTTTCCAAAGGGTTTCATAATTGGACATTGAACCCATTTTCATAT  
GATGGGAGTCGCCGGTGTACTGGGCGCGGCTCTGCTATGCGCTATTCATGGTGTACTGTAGAAAATACTTTATTTGAAG  
ATGGTGTAGGTGCAAATACATTCGCTGCTTTAACCCTCAAGCCGAAGAACTTATTCAATGGTACCAGGTAACCGC  
TTTTGGTACAAAATCTTTGGGGTGTCTTTTCCAATAAACCTGGTTACATTTCTTTATGTTATTTGTACCGGTAACCTGG  
TTTATGGATGAGTGTCTTTGGAGTAGTCGGTTTAGCTTTGAACCTACGTGCCTATGACTTCGTTTTCCAGGAAATCCGCTG  
CAGCGGAAGATCCAGAATTTGAGACTTTCTATACTAAAAATTTCTTTTAAACGAAGGTATTCTGCTTGGATGGCGGCT  
CAAGATCAGCCTCATGAAAACCTTATATTCCTGAGGAGGTTCTACCACGTGGAAACGCTCTT---  
ATGTCTGGAAGCACAGGAGAACGTTCTTTTGTGATATTATTACCAGTATTCGATACTGGGTCATTTCATAGCATTACTAT  
ACCTTCCCTATTCATTGCGGGCTGGTTATTCGTGAGCACCAGGTTTAGCTTACGATGTGTTCCGGGAGCCCTCGTCCAAACG  
AGTATTTTACAGAGAGCCGACAAGGCATTCCATTAATAACAGGCCGTTTTGATCCTTTGGAACAACCTCGATGAATTTAGT  
AGATCTTTT---  
ATGACTATAGATAGGACCTATCCAATTTTTACAGTGCCTGGTTGGCTGTTTCATGGACTAGCTGTACCTACCGTTTTCTTT  
TTTGGGGTCAATATCAGCAATGCAGTTCATCCAACGA-----  
ATGGCTACACAACTGTTGAAGATAGT---TCT---AGATCTGGT-----  
CCAAGAAGCACTACTGTAGGGAAGTTATTGAAACCATTGAATTCGAAATATGGTAAAGTAGCTCCCGGATGGGGAACGAC  
CCCTTTGATGGGTGTTGCAATGGCTCTATTTGCGGTATTCCTATCTATTATTTGGAGATTTATAATTTCTTCTGTTCTAC  
TGGATGGAATTTCAAGTGAAT-----  
ATGCTTACTCTCAAATTTTTGTATACACTGTAGTTATATTCTTTGTTTCTCTCTTCATATTTGGATTCCCTATCTAATGA  
TCCAGGACGTAATCCGGGA---CGTGAAGAA-----  
ATGGCTGATACTACTGGAAGGATTCTCTTTGGGTAATAGGTACTGTAGCTGGTATTCTTGTGATCGGTTAATAGGTAT  
TTTCTTTTATGGTTCATATTCAGGATTAGGTTTCATCCCTG-----ATGCTT-----  
AATATATTTAATTTGATCTGTATTTTTTTAATTTCTACCCTT---TTTTCA-----  
AGCACTTTTTTAGTCGCCAAATTTGCCAGAGGCCTACGCCTTTTGAATCCAATCGTAGATGTTATGCCCGTAATACCTCT  
TTTCTTTTCTCTTAGCCTTTGTTTGGCAAGCCGCTGTAAGTTTTCGA---ATGACACAATCA-----  
AATCCGAACGAACAAAGTGTTGAATTAATCGTACCAGTCTCTATTGGGGGTTATTACTCATTTTTTGTACTTGCTGTTTT  
ATTTTTCGAATTTCTTCAAT---ATG---  
GAAGTAAATATTCTTGCATTTATTGCTACTGCACTCTTCATTCTCGTTCCCTACTGCTTTTTTTGCTTATAATTTACGTAA  
AACCCTTAGTCAAAAT-----GAT-----  
ATGGAAACAGCAACCCTAGTCGCCATCTTTATATCTGGGTTACTTGTAAAGTTTTACTGGGTATGCTCTATATACTGCCTT  
TGGGCAA---CCCTCTCAACAATAAGAGATCCATTGAGGAACACGGGGAC---  
ATGGAAGCATTGGTTTATACATTTCTCTTAGTATCCACTTTAGGGATAATTTTTTTTTCGCTATTTTTTTTTCGGGAACCACC  
TAAAATTTCA-----  
ATGACTATTGCTTTCCAATTGGCAGTTTTTGCATTAATTATTACTTCATCAATCTTACTGATTAGTGTACCCGTTGTATT

TGCGTCTCCTGATGGTTGGTCGAGTAACAAAAATGTTGTATTTTCTGGTACATCTTTATGGATTGGATTAGTCTTCTTGG  
TGGGTATCCTTAATTCTCTTATCTCT---  
ATGTCACCACAAACAGAGACTAAAGCAAGTGTGGGTTCAAAGCTGGTGTAAAGAGTATAAAATTGACTTACTATACTCC  
TGAATATGAAACCAAGGATACTGATATCTTGGCAGCATTCCGAGTAACCTCCTCAACCTGGAGTTCCACCTGAAGAAGCAG  
GGGCTGCGGTAGCTGCTGAATCTTCTACTGGTACATGGACAACCTGTGTGGACCGATGGGCTTACCAGCCTTGATCGTTAC  
AAAGGACGATGCTACCACATCGAGCCCCGTTCCAGGAGAAGAACTCAATTTATTGCGTATGTAGCTTATCCCTTAGACCT  
TTTTGAAGAAGGTTCCGGTTACTAACATGTTTACCTCGATTGTGGGTAATGTATTTGGGTTCAAAGCCCTGGCTGCTCTAC  
GTCTAGAGGATCTGCGAATCCCTCCTGCTTATACTAAAACCTTCCAAAGGACCACCTCATGGTATCCAAGTTGAAAGAGAT  
AAATTGAACAAGTATGGACGTCCCCTATTAGGATGTACTATTAACCAAAAATTGGGGTTATCCGCGAAAAACTATGGTAG  
AGCAGTTTATGAATGTCTACGTGGTGGACTTGATTTTACCAAAGATGATGAGAATGTGAACCTCCAACCTTATGCGTT  
GGAGAGACCCTTCTTATTTTGTGCCGAAGCTATTTATAAATCACAGGCTGAAACAGGTGAAATCAAA-----  
GGGATTATTTGAATGCTACTGCGGGTACATGCGAAGAAATGATCAAAGAGCTGTATTTGCCAGAGAATTGGGAGTTCC  
TATCGTAATGCATGACTACTTAAACAGGGGGATTCCCGCAAATACTAGTTTGTCTCATTATTGCCGAGATAATGGCCTAC  
TTCTTACATCCACCGTGAATGCACGCTGTTATTGATAGACAGAAGAATCATGGTATGCACCTTC

Atropa

TCTAGGTTGGGGGGTAGGCCCTGGGGGAGAAGTTATAGACACCTTTCATACTTTGTATCTGGAGTACTTCATTTAATTT  
CTTCTGCAGTATTGGGCTTTGGCGGCATTTATCATGCACTTCTGGGACCTGAGACACTTGAAGAATCTTTTCCCTTCTTT  
GGTTATGTCTGGAAAGATCGAAATAAAATGACCACAATTTTAGGTATTCACTTAATCTTGTAGGTATAGGTGCTTTTCT  
TCTAGTATTCAAGGCTCTTTATTTTGGGGGTGTATATGATACCTGGGCTCCAGGAGGG---GGAGATG---  
TAAGAAAAATTACCAACTTGACCCTTAGCCCAGATATCATATTTGGTTATTTACTAAAATCCCCTTTTGGAGGGGAAGGC  
TGGATTGTTAGTGTAGACGATTTAGAAGATATAATTGGAGGACATGTATGGTTAGGTTCC---  
ATTTGTATACTTGGTGAATCTGGCATACTTAACCAAACCTTCGCATGGGCTCGACGCGCACTTGTATGGTCTGGAGA  
GGCTTACTTATCTTATAGTTTGGGGCTTTAGCCGCTTTGGTTTCATTGCTTGTGTTTTGTCTGGTTCAATAATACCG  
CTTATCCTAGTGAATTTACGGACCTACTGGACCAGAAGCTTCTCAAGCTCAAGCATTACTTTTCTAGTTAGAGACCAA  
CGTCTTGGGGCTAACGTGGGATCCGCTCAAGGACCTACTGGTTTAGGTAAATATCTAATGCGTTCCCCGACCGGAGAAGT  
CATTTTGGAGGAGAACTATGCGTTTTTGGGATCTGCGTGCTCCATGGTTAGAGCCTCTAAGGGGTCCAAATGGGTTAG  
ACTTGAGTAGGTTGAAAAAAGACATACAA---  
CCTTGGCAGGAACGGCGTTCCGCGGAATATATGACTCATGCTCCTTTAGGTTCTTTAAATTCGGTGGGTGGTGTAGCTAC  
CGAGATCAATGCAGTCAATTTATGCTCTCTCCTAGAAAGTTGGTTAGCTACCTCTCATTTTGTTTTAGGATTCTTCTTCTCG  
TAGGTCAATTTGTGGCACGCGGGAAGGGCTCGTGCAGCTGCAGCAGGATTTGAAAAAGGAATTGATCGTGACTTTGAACCT  
GTTCTTTCCATGACCCTCTTAAT-----  
ATGACTATAGCCCTTGATAAGTTTACCAAAGACGAA-----  
AATGATTTATTTGATATTATGGATGACTGGTTACGGAGGGACCGTTTTCGTTTTTGTAGGCTGGTCCGGTCTATTGCTCTT  
TCCTTGTGCCTATTTTGTGTAGGGGGTGGTTACAGGTACAACCTTTGTAACCTCATGGTATACCCATGGATTGGCCA  
GTTCTTATTTGGAAGGCTGCAATTTCTTAACTGCCGCAGTTTCTACTCCTGCTAATAGTTTACGACATTCGTTGTTGTTA  
CTATGGGGTCTGAAGCACAAAGGAGATTTACTCGTTGGTGTCAATTGGGGGTCTGTGGACTTTTGTGCTCTCCATGG  
AGCTTTTGGCCTAATAGGTTTTCATGTTACGTCAATTCGAGCTTGCTCGATCCGTTCAATTGAGACCTTATAATGCAATCG  
CATTCTCTGGTCCAATTGCTGTTTTTGTCTGTATTTCTGATTTATCCACTAGGTGAGTCTGGTTGGTTCTTTGCACCT  
AGTTTTGGTGTAGCAGCTATATTTGATTCATCCTATTTTTTCAAGGGTTTATAATTGGACCTTGAACCCCTTTTCATAT  
GATGGGAGTTGCCGGTGTATTGGGCGCTGCTTTGCTATGCGCCATTATGGTGTACCGTAGAAAATACTTTATTTGAAG  
ACGGTGATGGTGCAAATACATTCCGTGCTTTTTAACCCTCAAGCCGAAGAACTTATTCAATGGTCACCGCTAACCCTG  
TTTTGGTCCCAAATCTTTGGGGTTGCTTTTTCCAATAAACGTTGGTTACATTTCTTTATGTTATTTGTACCAGTAACCCTG  
TTTATGGATGAGTGTCTTGGAGTAGTCGGTCTAGCCCTGAACCTACGTGCCTATGACTTCGTTTCTCAGGAAATTCGCG  
CAGCGGAAGATCCTGAATTTGAGACTTTCTACACCAAAAAATATTCTCTTAAACGAAGGTATTTCGCGCTTGGATGGCGGT  
CAAGATCAGCCTCATGAAAACCTTATATCCCTGAGGAGGTTCTACCACGTGGAACGCTCTT---  
ATGCTGGAAGCACAGGAGAACGTTTCGTTTGTGATATTATTACCAGTATTCGATACTGGGTCAATCATAGCATTACTAT  
ACCTTCCCTATTTCAATGCGGGTTGGTTATTTGTGAGCAGTGGTTTAGCTTATGATGTGTTTTGGAAGCCCTCGGCCAAACG  
AGTATTTTACAGAGACCGACAAGGAATTCATTAATAACTGGCCGTTTTGATTCTTTGGAACAACTCGATGAATTTAGT  
AGATCGTTT---  
ATGACTATAGATCGAACCTATCCAATTTTTACAGTACGATGGTTGGCTGTTACGGCCTAGCTGTACCTACCGTCTTTTT  
TTTGGGATCAATATCAGCAATGCAGTTCATCCAACGA-----  
ATGGCTACACAACTGTTGAGAACAGT---TCT---AGATCTGGT-----  
CCAAGACGAAGTGCAGTAGGAGATTTATTAACCATTGAATTCGGAATATGGTAAAGTAGCTCCTGGATGGGGAACTAC  
TCCTTTGATGGGTGTCGCAATGGCCTTATTTGCGGTATTTCTATCTATTATTTGGAGATTTATAATTCTTCCGTTTTAT  
TGGATGGAATTTCAATGAAT-----  
ATGCTTACTCTCAAACCTCTTCGTTTACACAGTAGTGATATTTTTGTTTTCTCTTTCATCTTTGGATTCCCTATCTAATGA  
TCCCGGACGTAATCCTGGA---CGTGAAGAA-----



ATGGCCGATACTACTGGAAGGATTCTCTTTGGATAATAGGTACTGTAGCTGGTATTCTTGTAATCGGTTTAAATAGGTAT  
TTTCTTTTATGGTTTCATATTCCGGATTGGGTTTCATCCCTG-----ATGCTT-----  
AATACCTTTAGTTTGATCGGTATCTGTCTTAATTTCGACCCTT---TATTCG-----  
AGTAGTTTTTTCTTCGGCAAATTGCCCCGAGGCCTATGCTTTTTTGAATCCAATCGTAGATATTATGCCAGTCATACCTCT  
GTTCTTTTTTCTCTTAGCCTTTGTTTGGCAAGCTGCTGTAAGTTTTTCGA---ACGACACAATCA-----  
AACCCGAACGAACAAAGTGTGAATTGAATCGTACCAGTCTCTACTGGGGGTTATTACTCATTTTTTGTACTTGTCTTTTT  
ATTTTCCAATTATTTCTTCAAT---ATG---  
GAAGTAAATATTCTTGCATTTATTGCTACTGCCTATTTATTCTAGTTCCTACCGCTTTTCTACTTATCATTACGTAAA  
AACAGTCAGTCAAAAC-----GAT-----  
ATGGAAACAGCAACCCTAGTCGCCATCTTTATATCTGGTTTACTTGTAAAGTTTTACTGGGTACGCCTTATATACCGCTTT  
TGGGCAA---CCTTCTCAACAATAAGAGATCCATTTCGAGGAACATGGAGAC---  
ATGGAAGCATTGGTTTATACATTTCTCTTAGTCTCGACTCTAGGGATAATTTTTTTCGCTATCTTTTTTTCGAGAACCGCC  
TAAACTTCCA-----ACTAAAAAGAAC-----  
ATGACTCTTGCTTTCCAATTGGCTGTTTTTGCATTAATTGCTACTTTCATTAATCTTATTGATTAGCGTACCCGTTGTATT  
TGCTTCTCCTGATGGCTGGTCAAGTAACAAAAATGTTGTATTTTCTGGTACATCCTTATGGATTGGATTAGTCTTTCTGG  
TGGGTATCCTTAATTCTCTCATCTCT---  
ATGTCACCACAAACAGAGACTAAAGCAAGTGTGGATTCAAAGCTGGTGTAAAGAGTACAAATTGACTTATTATACTCC  
TGAGTACCAAACCAAGGATACTGATATATTGGCAGCATTCCGAGTAACCTCCTCAACCTGGAGTTCCACCTGAAGAAGCAG  
GGGCCGCGGTAGCTGCCGAATCTTCTACTGGTACATGGACAACCTGTATGGACCGATGGACTTACCAGCCTTGATCGTTAC  
AAAGGGCGATGCTACCGCATCGAGCGTGTGTTGGAGAAAAAGATCAATATATTGCTTATGTAGCTTACCCTTTAGACCT  
TTTTGAAGAAGGTTCTGTTACCAACATGTTTACTTCCATTGTAGGTAATGTATTTGGGTTCAAAGCCCTGCGCGCTCTAC  
GTCTGGAAGATCTGCGAATCCCTCCTGCTTATGTTAAACTTTCCAAGGTCCGCCTCATGGGATCCAAGTTGAAAGAGAT  
AAATTAACAAGTATGGTCGTCCTGTTGGGATGTAATTAACCTAAATTGGGGTTATCTGCTAAAAACTACGGTAG  
AGCTGTTTATGAATGTCTTCGCGGTGGACTTGATTTTACCAAAGATGATGAGAACGTGAACTCACAACCATTTATGCGTT  
GGAGAGATCGTTTCTTATTTTGTGCCGAAGCACTTTATAAAGCACAGGCTGAAACAGGTGAAATCAAA-----  
GGGCATTACTTGAATGCTACTGCAGGTACATGCGAAGAAATGATCAAAAGAGCTGTATTTGCTAGAGAATTGGGTGTTCC  
GATCGTAATGCATGACTACTTAAACGGGGGATTACCGCAAATACTAGCTTGGCTCATTATTGCCGAGATAATGGTCTAC  
TTCTTCACATCCACCGTGCAATGCATGCGGTTATTGATAGACAGAAGAATCATGGTATCCACTTCC

Buxus

TCTAGGTTGGGGGGTAGGTCCTGGTGGGGAGGTTATAGACACCTTTCCATACTTTGTATCTGGAGTACTTCACTTAATTT  
CCTCTGCAGTATTGGGCTTTGGCGGCATTTATCATGCACTTCTTGGACCTGAGACTCTTGAAGAATCTTTTCCATTCTTC  
GGCTATGTATGGAAAGATAGAAATAAAATGACCACGATTTTGGGTATTCACTTAATTTTGTAGGTATAGGCGCTTTTCT  
TCTAGTACTCAAGGCTCTTTATTTTGGGGCGTATATGATACCTGGGCTCCTGGGGGG---GGAGATG---  
TAAGAAAAATTACAAATTTGACCCTTAGTCCAAGTGTATATTTGGTTATTTACTAAAATCTCCCTTTGGGGGAGAGGGA  
TGGATTGTTAGTGTGGACGATTTAGAAGATATAATTGGAGGACATGTATGGTTAGGTTCC---  
ATTTGTATAGTTGGTGGAACTTGGCATACTTAACCAAACCCTTTGCATGGGCTCGACGCGCACTTGTATGGTCTGGGGA  
GGCTTACTTGTCTTATAGTTTGGGTGCTTTATCTGTCTTTGGTTTCATCGCTTGTGCTTTGTCTGGTTCAATAATACCG  
CTTATCCTAGTGAGTTTTATGGGCCACTGGGCCAGAAGCTTCTCAAGCCCAAGCATTACTTTTTTGTAGTAGAGACCAA  
CGCCTTGGGGCTAACGTGGGATCTGCTCAAGGACCTACTGGTTTGGTAAATACCTAATGCGTTCCCCGACTGGAGAGGT  
AATTTTTGGAGGGGAGACTATGCGTTTTTGGGATCTCCGGGCTCCTTGGTTGGAACCTTAAGGGGTCCCAATGGTTTGG  
ACTTGAGTAGACTGAAAAAAGACATACAA---  
CCTTGGCAAGAACGGCGTTCGCGGGAATATATGACTCATGCCCTTTAGGTTCTTTAAATTCGGTGGGTGGCGTAGCTAC  
TGAGATCAATGCAGTCAATTATGTCTCTCCTAGAAGTTGGTTAGCTACCTCTCATTTTGTTCTAGGATTCTTCCTATTCCG  
TAGGTCATTTGTGGCATGCTGGAAGAGCCCGTGCAGCAGGATTTGAAAAAGGAATTGATCGTGATTTTGAACCT  
GTTCTTTCCATGACCCCTCTTAAC-----  
ATGACTATAGCCCTTGGTAGATTTACCAAAGACGAA-----  
AATGACTTATTTGATATTTAGGATGACTGGTTGCGGAGGGACCGTTTTCGTTTTTGTAGGTTGGTCCGGTCTATTGCTCTT  
TCCTTGTGCCTATTTTCGCTTTAGGAGGTTGGTTTACGGGTACAACCTTTGTAACCTTCATGGTATACTCATGGATTGGCTA  
GTTCTTATTTGGAAGGCTGCAATTTCTTAACCGCCGAGTTTCTACTCCTGCTAATAGTTTAGCACATTCTTTGTTGCTA  
CTATGGGGTCTGAAGCACAGGGAGATTTTACTCGTTGGTGTCAATTAGGTGGTCTGTGGACTTTTGTGCTCTCCATGG  
CGCTTTCGGACTAATAGGTTTTCATGTTACGTCAATTCGAACCTTGTCTGATCTGTTCAATTGCGACCTTATAATGCAATCG  
CATTCTCTGCTCCAATTGCTGTTTTTGTCTGTATTCTGATTTATCCACTAGGTGAGTCTGGTTGGTTCTTTGCACCT  
AGTTTTGGTGTAGCAGCTATATTTTCGATTTCATCCTCTTCTTCCAAGGATTTTATAATTGGACATTGAACCCATTTTCATAT  
GATGGGAGTTGCCGGTGTATTGGGCGCTGCTCTGCTATGCGCTATTCACGGTGTACCGTGGAAAATACTTTATTTCGAAG  
ATGGTGACGGTGCAAATACATTCCGTGCTTTTAAACCAAACCTCAAGCCGAAGAGACTTATTCAATGGTACCAGTAACCGC  
TTTTGGTCCCAAATCTTTGGGGTTGCTTTTTCCAATAAACGTTGGTTACATTTCTTTATGTTATTTGTACCAGTAACCGG  
TTTATGGATGAGTGTCTTTGGAGTAGTCGGTCTGGCTCTGAACCTACGTGCCTATGACTTCGTTTTCCAGGAAATACGTG

CAGCGGAAGATCCTGAATTTGAGACTTTCTATACCAAAAAATATTCTCTTAAACGAAGGTATTTCGTGCTTGGATGGCGGCT  
CAGGATCAGCCTCATGAAAACCTTATATTCCCTGAGGAGGTTCTACCCCGTGGAAACGCTCTT---  
ATGTCTGGAAGCACGGGAGAACGTTCTTTTGGCTGATATTATTACCAGTATTTCGATACTGGGTCAATTCATAGCATTACTAT  
ACCTTCCCTATTTCATTGCGGGTTGGTTATTTCGTGAGCAGGGGTTAGCTTACGATGTGTTTGGAAAGCCCTCGGCCAAACG  
AGTATTTTACAGAGAGCCGACAAGGAATTCATTAATAACTGGCCGTTTTGATTCTTTGGCACAACCTCGATGAATTTAGT  
AGATCCTTT---  
ATGACCATAGATCGAACCTATCCAATTTTTACAGTGCATGGTTGGCTGTTACGGACTAGCTGTACCTACCGTTTTTTTT  
TTTAGGGTCAATATCAGCAATGCAGTTCATCCAACGA-----  
ATGGCTACACAAATCGTTGAGGGTAGT---TCT---AGATCTGGT-----  
CCAAGACGAACACTACTGTAGGGGAATTATTGAAACCATTGAATTCGGAATATGGTAAAGTAGCTCCTGGATGGGGAACTAC  
TCCTTTGATGGGTGTTGCAATGGCTCTATTTGCGGTATTTCTATCTATTATTTGGAAATTTATAATTCTTCCGTTTTAC  
TGGATGGAATTTCAATGGGT-----  
ATGCTTACTCTCAAACCTCTTCGTTTACACAGTAGTGATATTCTTTGTTTCTCTGTTTCATCTTCGGATTCCCTATCTAATGA  
TCCAGGGCGTAATCCTGGA---CGTGAAGAA-----  
ATGGCCGATACTACTGGAAGGATTCCCTCTTTGGCTGATAGGTACTGTAACCTGGTATTCCCTGTGATCGGTTTTAATAGGTAT  
TTTCTTTTACGGTTCATATTCCGGATTGGGTTTCATCCCTA-----ATGCTT-----  
AATATCTTCAGTTTGATCTGTATCTATCTTAATTCTTCCCTT---CATTG-----  
AGTAGTTTTTTCTTCTCAAATTTGCCGAGGCTTACGCTTTTCTCAATCCAATCGTAGATGTTATGCCAGTTATACCTGT  
GCTCTTTTTTCTTCTAGCCCTTGTGGCAAGCTGCTGTAAGTTTTCGA---ACGACACAATCA-----  
AACCCGAACGAACAAAATGTTGAATTGAATCGTACCAGTCTCTACTGGGGGTTATTACTCATTTTTGTACTTGCTGTTTT  
ATTTTCCAATTATTTCTTCAAT---ATG---  
GAAGTAAATATTCTCGCATTATTGCTACTGCACCTCTTCATTCTAGTTCCTACTGCTTTTTTACTTATCATCTATGTA  
AACAGTGAGTCAAAT-----GAT-----  
ATGGAAACAGCAACCCTAGTCGCCATCTTTATATCTGGTTCATTGTAAGTTTTACCGGGTACGCCTTATATACCGCTTT  
TGGGCAA---CCCTCTCAACAATAAGAGATCCATTGAGGAACACGGGGAC---  
ATGGAAGCATTGGTTTATACATTCCCTCTTAGTCTCGACTCTAGGGATTCTTTTTTTTCGCTATTTTTTTTCGAGAACC  
TAAAGTTCCG-----ACTAAAAAGATGAAA---  
ATGACTATTGCTTTCCAATTGGCTGTTTTTGCATTAATTGCTACTTCATCAATCTTACTGATTAGTGTACCCGTTGTATT  
TGCTTCTCTGATGGTTGGTCAAGTAACAAAATGTTGTATTTTCCGGTACATCATTATGGATTGTATTAGTCTTTCTGG  
TGGGTACTCTTAATTCTCTCATCTCT---  
ATGTCACCACAAACAGAAAATAAGCAAGTGTTGGATTCAAAGCTGGTGTTAAAGATTACAAATTGACTTATTATACTCC  
TGAATATCAAACCAAAGATACTGATATCTTGGCAGCATTCCGAGTAACCTCAACCTGGAGTTCACCCGAGGAAGCAG  
GGGCCGCGGTAGCTGCCGAATCTTCTACTGGTACATGGACAACCTGTGTGGACTGATGGACTTACCAGCCTTGATCGTTAC  
AAAGGACGATGCTACCACATCGAGCCTGTTGCTGGAGAAGAAAATCAATTTATTGCTTACGTAGCTTACCCTTTAGACCT  
TTTTGAAGAAGGTTCTGTTACTAACATGTTTACTTCCATTGTGGGTAATGTATTTGGGTTCAAAGCCCTACGCGCTCTAC  
GTCTGGAGGATCTGCGAGTCCCTCCTGCTTATTCTAAAACCTTTCCAAGGCCACCTCATGGCATCCAAGTTGAGAGAGAT  
AAATTGAACAAGTATGGTTCGTCCTTATTGGGATGTACCATTAAACCAAATTTGGGGTTATCCGCTAAGAACTACGGTAG  
AGCTGTTTATGAATGTCTCCGCGGTGGACTTGATTTTACCAAGGATGATGAGAACGTAAACTCCCAACCATTTATGCGTT  
GGAGAGACCGTTTTCGTATTTTGTGCCGAAGCAATTTATAAAGCACAGGCTGAAACAGGTGAAATCAA-----  
GGACATTACTTGAATGCTACCGCAGGTACATGCGAAGAAATGATCAAAGGGCTGTATTTGCGAGAGAATTGGGTGTTCC  
TATCGTAATGCATGACTACTTAAACAGGGGGATTCACTGCAAATACTAGCTTAGCTCATTATTGTGCGAGATAATGGCCTAC  
TTCTTACATCCACCGCGCAATGCATGCAGTTATTGATAGACAGAAGAATCATGGTATACACTTCC  
Calycanthus  
TTTAGGTTGGGGGGTAGGTCCGGGTGGAGAAGTTATAGACACCTTTCCATACTTTGTATCTGGAGTACTTCACTTAATTT  
CCTCTGCAGTCTTAGGCTTTGGCGGTATTTATCATGCCCTTCTTGGACCTGAGACTCTTGAAGAATCCTTTCCATTCTTC  
GGTTATGTATGGAAGATAGAAAATAAAATGACCACAATTTGGGTATTCATTAATCTTGTAGGTATAGGTGCTTTTCT  
CTAGTACTCAAGGCTCTTTATTTTTGGGGGTGTATATGATACCTGGGCTCCAGGGGG---GGAGATG---  
TAAGAAAAATTACCAATTTGACCCTTAGCCAGGTGTTATATTTGGTTATTTACTAAAATCTCCCTTTGGGGGAGAAGGA  
TGGATTGTTAGTGTGGACGATTTGGAAGATATAATTGGAGGACATGTATGGTTAGGTTCC---  
ATTTGTATACTTGGTGAATCTGGCATATTTTAACCAAACCCTTTGCGTGGGCTCGCCGTGCATTTGTATGGTCTGGAGA  
GGCCTATTTGTCTTATAGTTTGGTGCCTTATCTGTCTTTGGTTTCATCGCTTGTGTTTTGTTTGGTTCAATAATACCG  
CTTATCCTAGTGAGTTTTATGGGCCACTGGGCCAGAGGCTTCTCAAGCTCAAGCATTACTTTTTCTGGTTAGAGACCAA  
CGTCTTGGGGCTAACGTGGGGTCCGCTCAAGGACCTACTGGTTTGGTAAATATCTAATGCGTTCCCCGACCGGAGAGGT  
CATTTTTGGAGGAGAACTATGCGTTTTTGGGATCTCCGTGCTCCTTGGTTGGAACCTCTAAGGGGTCCCAATGGTTTGG  
ACTTGAGTAGGTTGAAAAAAGACATACAA---  
CCTTGGCAAGAACGACGTTCCGCGGAATATATGACTCATGCTCCTTTAGGTTCTTTAAATTCGGTGGGTGGCGTAGCTAC  
CGAGATCAATGCGGTCAATTATGTCTCTCTAGAAAGTTGGTTAGCTACCTCTCATTTTTGTTCTAGGATTCTTCCATTTCG

TGGGCCATTTGTGGCATGCGGGAAGGGCTCGTGCGGCTGCAGCCGGATTTGAAAAAGGAATCGATCGTGATTTTGAACCT  
GTTCTTTCCATGACCCCTCTTAAC-----  
ATGACTATAGCCCTTGGTAGATTTACCAAAGAAGAA-----  
AATGATTTATTTGATATTATGGATGACTGGTTAAGGAGGGACCGTTTTCGTTTTTGTAGGTTGGTCCGGTTTTATTGCTCTT  
TCCTTGTGCTTATTTTCGCTTTAGGGGGTTGGTTCACAGGTACAACCTTTGTAACCTTCATGGTATACCCATGGATTGGCCA  
GTTCCATTTTGAAGGCTGCAATTTCTTAACCGCTGCAGTTTCTACTCCTGCTAATAGTTTACGACATTCGTTGTTGCTA  
CTATGGGGACCTGAAGCACAAGGAGATTTTACTCGTTGGTGTCAATTAGGGGGTCTGTGGACTTTTGTGCTCTCCATGG  
GGCTTTCGGACTAATCGGTTTCATGTTACGTCAATTTGAACTTGCTCGATCTGTTCAATTGCGACCTTACAATGCAATCG  
CATTCTCTGCTCCAATTGCTGTTTTTGTCTGTATTCCCTAATTTATCCACTAGGTCAGTCTGGTTGGTTCTTTGCGCCT  
AGTTTTGGTGTAGCAGCTATATTTTCGATTTCCTCTCTTCCAAGGGTTTCATAATTGGACGTTGAACCCATTTTCATAT  
GATGGGGTTGCCGGAGTATTGGCGCTGCTCTGCTATGCGCTATTTCATGGTGTACTGTAGAAAATACTTTTATTCGAGG  
ATGGTGACGGTGCAAATACATTCGGTCTTTTAAACCAACTCAAGCTGAAGAGACTTATTCGATGGTCACTGCTAACCGC  
TTTTGGTCCAAATCTTTGGGGTTGCTTTTTCCAATAAACGTTGGTTACATTTCTTTATGTTATTTGTACCGGTAACCGG  
TTTATGGATGAGCGCTATTGGAGTAGTCGGTCTGGCTCTGAACCTACGTGCCTATGACTTCGTTTTCCAGGAAATCCGCG  
CGGCGGAAGATCCTGAATTTGAGACTTTCTACACCAAAAATATTCTCTTAAACGAAGGTATTTCGTGCTTGGATGGCGGCT  
CAGGATCAGCCTCATGAAAACCTTATATTCCCTGAGGAGGTTCTACCCCGTGGAAACGCTCTT---  
ATGTCTGGAAGCACGGGAGAACGTTCTTTTGCTGATATTATTACCAGTATTCGATATTGGGTTATTCATAGTATTACTAT  
ACCTTCCTTATTTATTGCGGGTTGGTTATTCGTGAGCACAGGTTTAGCTTACGATGTGTTTGGGAGCCCTCGGCCAAACG  
AGTATTTACAGAGAGCCGGCAAGGGATTCCATTAATAACTGGCCGTTTTGATCCTTTGGCACAACCTCGATGAATTTAGT  
AGATCCTTT---  
ATGACCATAGATCGGACCTATCCAATTTTTACAGTGCATGGTTAGCTGTTACCGACTAGCTGTACCTACCGTTTTCTTT  
TTTGGGGTCAATATCAGCAATGCAGTTCATCCAACGA-----  
ATGGCTACACAAACTGTTGAGGGTAGT---TCT---AGATCTGGG-----  
CCAAGACGGACTCTTACAGGGGATTTATTGAAACCATTGAATTCGGAATATGGTAAAGTGGCTCCTGGATGGGGAACCAC  
CCCATTTATGGGTGTGCAATGGCTTTATTTGCCATATTCCTATCTATTATTTTGGAGATTTATAATTCTTCCGTTTTGT  
TGGATGGAATTTCAACGAGT-----  
ATGCTTACTCTCAAACCTCTCGTTTTACACAGTAGTGATATTCTTTGTTTTCTCTCTTCATCTTCGGATTCCCTATCTAATGA  
TCCAGGACGTAACCCTGGG---CGTGAGGAA-----  
ATGGCCGATACTACTGGAAGGATTCCTCTTTGGCTTATAGGTAAGTACTGTAACCTGGTATTCTGTGATCGGTTCAATAGGTAT  
TTTCTTTTACGGTTTCATATTCGGGATTCGGATCATCCCTA-----ATGCTT-----  
AATATCTTTAGTTTATCTGT-----CTTAATTCTGCCCTT---CATTG-----  
AGTAGCTTTTTCTTTGCCAAATTGCCCGAAGCTTATGCTTTTTTCAATCCAATCGTAGATGTTATGCCAGTCATACCTGT  
GCTCTTTTTCTTTTAGCCCTTGTGGCAAGCTGCTGTAAGTTTTTCG---ACGACACAATCA-----  
AACCCGAACGAACAAAGTGTGAATTGAATCGTACCAGTCTCTACTGGGGGTTATTACTCATTTTTTGTACTTGCTGTTTT  
ATTTTCCAATTATTTCTTCAAT---ATG---  
GAAGTCAATATTCTCGCATTATTGCTACTGCGCTGTTTATTCTAGTTTCTACTGCCTTTTTACTTATCATCTACGTA  
AACAGTCAGTCAAAGT-----GAT-----  
ATGGAACAGCAACCTTAGTCGCCATCTCCATATCTGGTTCACTTGTAAAGCTTTACGGGGTACGCCCTATATACCGCTTT  
TGGGCAA---CCCTCTCAACAATAAGAGATCCATTTGAGGAACACGGGGAC---  
ATGGAAGCATTGGTTTATACATTCCTGTTAGTCTCGACTTTAGGGATAATTTTTTTTCGCTATCTTTTTTCGAGAACC  
TAAGGTCCCG-----  
ATGATTATTGCTTTCCAATTGGCTGTTTTTGCATTAATTGCTACTTCATCAATCTTATTGATTAGTGTACCTGTTGTATT  
TGCTTCTCCCGATGGTTGGTCAAATAATAAAAATGTTGTATTTCTGGTACATCATTATGGATTGGATTAGTATTTCTGG  
TAGCTATCCTTAATTCTCTCATCTCT---  
ATGTCACAAAAACAGAGACTAAAGCAGGTGTTGGATTCAAAGCTGGTGTAAAGATTACAAATTGACTTATTATACTCC  
TGACTATGAAACCAAAGATACTGATATTTTGGCAGCATTCCGAGTAACCTCCTCAACCTGGAGTTCCAGCGGAGGAAGCAG  
GGGCTGCGGTAGCTGCCGAATCTTCTACTGGTACATGGACAACCTGTGTGGACCGATGGACTTACCAGCCTTGATCGTTAC  
AAAGGACGATGCTACCACATCGAGCCCCTTGTGGGGAGGAAAGTCAATTTATTGCCTATGTAGCTTATCCTTTAGACCT  
TTTTGAAGAAGTTCTGTTACTAACATGTTTACTTCTATTGTGGGTAATGTATTTGGGTTCAAAGCCCTACGAGCTCTAC  
GTCTAGAGGATCTGCGAATTCCTCCTGCTTATACCAAAAATTTCTTAGGCCCGCCCCATGGCATCCAAGTTGAACGGGAT  
AAATTGAACAAGTATGGTGCCTCCCTATTGGGATGTACTATTAACCAAAAATTTGGGGTTATCCGCCAAGAATACTACGGTAG  
GGCGGTTTATGAATGTCTCCGCGGTGGACTTGATTTTACCAAGGATGATGAGAACGTGAACTCCCAACCATTTATGCGTT  
GGAGAGACCGTTTTCTTATTTTGTGCCGAAGCCATTTTTAAATCGCAGGCCGAAACAGGTGAAATCAA-----  
GGACATTATTTGAATGCTACTGCAGGTACATGCGAAGAAATGATCAAAAGGGCCGTGTTTGGCTAGAGAATTGGGAGTTCC  
TATCGTAATGCATGACTATTTAACAGGGGGATTACTGCAAATACTAGCTTGGCTCATTATTGCCGGGACAACGGCCTAC  
TTCTTACATCCATCGCGCAATGCATGCAGTTATTGATAGACAGAAAAATCATGGTATGCACTTTC

Ceratophyllum

TCTAGGTTGGGGAGTAGGTCCGGGTGGAGAAGTTATAGACACCTTTCCATACTTTGTATCTGGAGTACTTCACTTAATTT  
CTTCTGCAGTCTTAGGCTTTGGTGGTATTTATCATGCACTTCTTGGACCTGAGACTCTTGAAGAGTCCTTTCCATTCTTC  
GGTTATGTATGGAAAGATAGAAATAAAATGACCACCATTTTGGGTATTCACTTAATCTTGTTAGGTCTAGGTGCTTTTCT  
TTTAGTATTTAAAGCTCTTTATTTTGGGGGTGTATATGATACTTGGGCTCCTGGGGGG---GGAGATG---  
TAAGAAAAATTACCAACTTGACCCTTAGCCCAAGTGTGATATTTGGTTATTTACTAAAATCTCCCTTTGGGGGGCGAAGGG  
TGGATTGTTAGTGTGGACGATTTAGAAGATATAATTGGAGGACATGTATGGTTAGGTTCC---  
ATTTGTATACTTGGTGGAACTTGGCATATCTTAACCAAACCTTTTGCATGGGCTCGCCGCGCATTGTATGGTCTGGAGA  
GGCTTACTTGTCTTATAGTTTAGCTGCTTTAGCTGTCTTTGGTTTCATCGCTTGTGTGTTTCGTCTGGTTAATAATACCG  
CTTATCCTAGTGAGTTTACGGGCCACCGGACCAGAAGCTTCTCAAGCTCAAGCATTACTTTTCTAGTTAGAGATCAA  
CGCCTTGGGGCTAACGTGGGATCTGCTCAAGGACCTACTGGTTTAGGTAAATATCTAATGCGTTCCCCGACGGGAGAGGT  
TATTTTGGAGGGGAAACTATGCGTTTTTGGGATCTACGTGCTCCTTGGTTGGAACCTCTAAGAGGTCTAATGGTTTGG  
ACTTGAGTAGGCTGAAAAAGGACATACAA---  
CCTTGGCAAGAACGACGTTTACGCGGAATATATGACTCATGCTCCTTTAGGTTCTTTAAATCTGTGGGTGGCGTAGCTAC  
CGAAATCAATGCGGTTAATTACGTCTCTCCTAGAAGTTGGTTAGCTACTTCTCATTGTTTCTGGGATTTTTTCTATTG  
TGGGTCATTTGTGGCATGCGGGAAGGGCACGCGCAGCTGCTGCAGGATTTGAAAAGGAATCGATCGTGATTTGGAACCA  
GTTCTTTCCATGACCCCTCTTAACTGA-----  
ATGACTATAGCTCTTGGTAGATTTACCAAAGAAGAA-----  
AAAGATTTATTTGATATTATGGATGACTGGTTACGGAGAGACCGTTTTGTTTTGTAGGGTGGTCCGGTCTATTGCTCTT  
TCCTTGTGCTTATTTGCTTTAGGAGGTTGGTTACAGGGACAACCTTTGTAACCTTCATGGTATACCCATGGATTGGCTA  
GTTCTTATTTGGAAGGCTGCAATTTCTTAACTGCTGCAGTTTCTACTCCTGCTAATAGTTTAGCACATTCTTTGCTACTA  
CTATGGGGTCTGAAGCACAAGGGGATTTACTCGTTGGTGTCAATTAGGAGGTCTATGGACTTTTGTGCTCTCCATGG  
TGCTTTCGGATTAATAGGTTTCATGTTACGTCAATTCGAACCTTGCTCGATCTGTTCAATTGCGACCTTATAATGCAATTG  
CATTCTCCGCTCCAATTGCTGTTTTTGTGTTCTGTATTCCCTATTTATCCACTAGGTCAAGTCTGGTTGGTTCTTTGCACCT  
AGTTTTGGTGTAGCAGCTATATTTGATTTCATCCTCTTCTTCCAAGGGTTTCATAATTGGACGTTAAACCCATTTTCATAT  
GATGGGAGTTGCCGGAGTATTGGGTGCTGCTCTACTATGCGCTATTCACGGTGTACCCGTAGAAAATACTTTATTCGAAG  
ATGGTGACGGTGCAAATACATCCGTGCTTTTAAACCAAACCTCAGGCTGAAGAGACTTATTCAATGGTCACTGCTAACC  
TTCTGGTCCCAAATCTTTGGGGTGTCTTTTCCAACCAAACCTTGGTTGATTTTCTTTATGTTATTTGTACCCAGTAACCGG  
TTTATGGATGAGTGTCTTTGGAGTAGTCGGTCTGGCTGTAACCTACGTGCCTATGACTTTGTTTTCGAGGAAATCCGCTG  
CGCCGAAGATCCTGAATTTGAGACTTTCTACACAAAAAATCTTCTTAAACGAAGGTATTCTGTGCTTGGATGGCGGCT  
CAGGATCAGCCTCATGAAAACCTTATATCCCTGAGGAGGTTCTACCACGTGGAAACGCTCTTTAAATGTCTGGAAGCAC  
GGGAGAACGTTCTTTTGTGATATTATTACCAGTATTCGATACTGGGTTATTCATAGCATTACTATAACCTTCCCTATTCA  
TTGCGGGTGGTTATTGCTCAGTACAGGTTTAGCTTATGATGTGTTTGGAAAGCCCTCGGCCAAACGAGTATTTTACAGAG  
AACCAGAACGGGATTCCCTTGATAACTGGCCGTTTTGATTCTTTGGAACAACCTCGATAAATTTAGTAAATCCTTTTAGAT  
GACCATAGATCGAACTTACCCTATTTTTACAGTGCATGGTTGGCTGTTACGGACTAGCTGTACCTACCGTTTTCTTTTT  
TGGGGTCAATATCAGCAATGCAGTTCATCCAACGATAA-----  
ATGGCTACACAAACAATTGAGGGTAGT---TCT---AGATCTGGA-----  
CCAAGACGAAGTGTGTTAGGGGATTTATTGAAACCTTTGAATTCAGAATATGGTAAAGTAGCCCTGGATGGGGAACTAC  
CCCTTTTATGGGTGTGCAATGGCTCTATTTGCGATATTCTTATCGATTATTTTGGAGATTTATAATTTCTCCGTTTTAT  
TAGATGGAATTTACCGAGTTAG-----  
ATGCTTACTCTCAAACCTTTCGTTTACACAGTAGTGATATTCTTTGTTTCTCTCTTCATTTTTGGATTCCCTATCTAATGA  
TCCAGGACGTAATCCTGGA---CGTGAGGAATAA---  
ATGGCCGATACTACTGGAAGGATTCCCTCTTTGGCTGATAGGTACTTTAACTGGTATTCCCTGTGATCGGTTCAATAGGTAT  
TTTCTTTTACGGTTCATATCCGGATTGGGTTTCATCCCTGTAG-----ATGCTT-----  
AATATCTTGAGTTTGTATCTGT-----CTTAATCTGCCTTT---CATTCA-----  
AGTGGTTTTGTCTTCGCTAAATTCCTGAAGCTTACGCTTTATTCAATCCAATCGTAGATTTTATGCCAGTCATTCTTT  
GCTCTTTTTTCTCTTAGCCTTCGTTTGGCAAGCTGCTGTAAGTTTTCGATAAACGACACAATCA-----  
AACCCGAACGAACAAGTGTGAATTGAATCGTACCAGTCTATACTGGGGGTTATTACTCATTTTTTGTACTTGGCTGTTTT  
ATTTTCCAATTATTTCTTTAATTGAATG---  
GAAGTCAATATTCTCGCATTTATTGCTACTGCACTGTTTATTGTTTCTACTGCTTTTTTACTTATCATCTACGTAAA  
AACAGTCAGTAAAAAT-----GATTAA-----  
ATGGAAACAGCAACCCTAGTCGCCATCTCCATATCCGGTTTACTTGTAAAGCTTTACAGGGTACGCCTTATATACCGCTTT  
TGGGCAG---  
CCCTCTCAACAACCTCAGAGATCCATTTCGAGGAACACGGGGACTAGATGGAAGCATTGGTTTTATACATTCTGTTAGTCTC  
GACTCTAGGGATAATATTTTTCGCTATTTTTTTTTCGAGAACCACCCAAGGTTCCA-----  
ACTAAAAGCTGAAATGAATGACTATTGCTTTCCAATTGGCTGTTTTTGCATTAATTGCTACTTTCATTAGTCTTACTGAT  
TAGTGTACCCGTTGTTTTGCTTCTTCTGAAGGTTGGTCAAGTAACAAAAATGTTGTATTTCCGGTACATCATTATGGA

TTGGGTTAGTCTTTCTGGTAGCTATCCTTAATTCTCTCATATCTTGAATGTCACCACAAACAGAACTAAAGCAAATGTT  
GGATTCAAAGCCGGCGTTAAGGATTACAAATTGACTTATTATACTCTGACTATGAAACCAAAGATACTGATATCTTGGC  
AGCATTCCGAGTAAGTCTCAACCCGGAGTTCACCTGAGGAAGCAGGTGCTGCAGTAGCTGCCGAATCTTCTACTGGTA  
CATGGACAACCGTGTGGACCGATGGACTTACCAGCCTTGATCGTTACAAAGGACGATGCTACGACATCGAACCCGTTGCT  
GGAGAGGAAAATCAATATATTGCTTATGTAGCTTACCCTTTAGACCTTTTTGAAGAAGGTTCTGTTACTAACATGTTTAC  
TTCCATTGTGGGTAATGTATTTGGGTTCAAAGCTCTACGAGCGCTACGTCTGGAAGATTTACGAATCCCTGTTGCTTATG  
TCAAACTTTCCAAGGTCCGCCACATGGTATCCAAGTTGAGAGAGATAAACTGAACAAGTATGGTCGTCCTCTATTGGGA  
TGCATTATAAACCAAAATTTGGGTTATCCGCTAAGAAGTATGGTAGAGCGGTTTATGAATGTCTACGCGGTGGACTTGA  
TTTTACCAAGGATGATGAGAAGTGAACCCCAACCTTATGCGTTGGAGAGACCGTTTCGTATTTGTGCCGAAGCGA  
TTTATAAAGCACAGGCCGAAACGGGTGAAATCAA-----  
GGACATTACTTGAATGCTACTGCGGGTACATGCGAAGAAATGATGAAAAGGGCCGAATTTGCCAGAGAGTTAGGAGTTCC  
TATCGTAATGCATGACTACTTAACGGGGGATTCACTGCGAATACTACCTTGGCTCATTATTGCCGAGACAATGGTCTAC  
TTCTTACATCCACCGCAATGCATGCAGTTATTGATAGACAGAAAAATCATGGTATACACTTTC

Chloranthus

TCTAGGTTGGGGGTTAGGTCCTGGTGGGGAAGTTATAGACACCTTTCCATACTTTGTATCTGGAGTACTTCACTTAATTT  
CCTCTGCAGTCTTAGGCTTTGGCGGTATTTATCATGCACTTCTCGACCTGAGACTCTTGAAGAATCCTTTCCATTCTTC  
GGTTATGTATGGAAAGATAGAAATAAAATGACCACCATTTTGGGTATTCCTTAATCTTGTAGGGATAGGTGCTTTTCT  
TCTAGTACTCAAGGCTCTTTATTTTGGGGCGTATATGATACCTGGGCTCCAGGGGGG---GGAGATG---  
TAAGAAAAATTACCAACTTGACCCTTAGCCCAAGTGTATATTTGGTTATTCACTAAAATCACCTTTGGGGGAGAAGGA  
TGGATTGTTAGTGTGGACGATTTAGAAGATATAATTGGAGGACATGTCTGGTTAGGTTCC---  
ATTTGTATACTTGGTGAATCTGGCATATCTTAACCAAGCCCTTTCATGGGCTCGCCGCGCATTGTATGGTCTGGAGA  
GGCTTACTTGTCTTATAGTTTGGGTGCTTTATCTGTCTTTGGTTTCATCGCTTGTGTTTCGTCTGGTTCAATAATACCG  
CTTATCCTAGTGAGTTTTACGGGCCTACCGGGCCAGAAGCTTCTCAAGCTCAAGCATTACTTTTTCTAGTTAGAGACCAA  
CGTCTTGGGGCTAACGTGGGATCCGCTCAAGGACCTACTGGTTTAGGTAAATATCTAATGCGTTCCCCGACTGGAGAAGT  
CATTTTTGGAGGAGAACTATGCGTTTTTGGGATCTACGTGCCCTTGGTTGGAACCTCTAAGGGGTCCCAATGGTTTGG  
ACTTGAGTAGGCTGAAAAAAGACATACAA---  
CCTTGGCAAGAACGACGTTTCGGCAGAATATATGACTCATGCTCCTTTAGGTTCTTTAAATTCCTGGGTGGCGTAGCTAC  
CGAGATCAATTGCAGTCAATTATGTCTCTCCTAGAAGTTGGTTAGCTACCTCTCATTGTTCTAGGATTCTTCTCTATTTCG  
TGGGTCATTTGTGGCATGCGGGAAGGGCCCGTGCAGCTGCAGCAGGATTTGAAAAAGGAATCGATCGTGATTTTGAACCT  
GTTCTTTCCATGACCCCTCTTAAC-----  
ATGACTATAACCTTGGTAGATTTACCAAAGAAGAA-----  
AATGATTTATTTGATATTATGGATGACTGGTTACGGAGGGACCGTTTTCGTTTTTGTAGGTTGGTCCGGTCTATTGCTCTT  
TCCTTGTGCTTATTTGCTTTTAGGAGGTTGGTTACGGGTACAACCTTTGTAACCTTCATGGTATACCCATGGATTGGCCA  
GTTCTTATTTGGAAGGCTGCAATTTCTTAACCGCTGCAGTTTCTACTCCTGCTAATAGTTTAGCACATTCTTTGTTGCTA  
CTATGGGGCCCCGAAGCACAAAGGAGATTTACTCGTTGGTGTCAATTAGGTGGTCTGTGGACTTTTGTGCTCTCCATGG  
CGCTTTCGGACTAATAGGTTTTCATGTTACGTCAATTCGAACCTTGTCTGATCTGTTCAATTGCGACCTTATAATGCAATCG  
CATTTTCTGCTCCAATTGCTGTTTTTGTCTGTATTCTGATTTATCCACTAGGTGAGTCTGGTTGGTTCTTTGCGCCC  
AGTTTTGGTGTAGCAGCTATATTTGATTCATCCTTTTCTTCCAAGGGTTTCATAATTGGACGTTGAACCCCTTTTCATAT  
GATGGGAGTTGCCGGAGTATTGGGCGCTGCTCTGCTATGCGCTATTATGGTGTCTACCGTAGAAAATACTTTATTTCGAAG  
ATGGTGACGGTGCAAATACATTCCGTGCTTTTAACCAACTCAAGCCGAAGAGACTTATTTCATGGTCACTGCTAACCCG  
TTTTGGTCCCAAATCTTTGGGGTTGCTTTTTCCAATAAACGTTGGTTACATTTCTTTATGTTATTTGTACCAGTAACCGG  
TTTATGGATGAGTGCTCTTGGAGTAGTCGGTCTGGCTCTGAACCTACGTGCCTATGACTTTGTTTTCCAGGAAATCCGTG  
CAGCGGAAGATCCTGAATTTGAGACTTTCTATACCAAAAATATTCTCTTAAACGAAGGCATTTCGTGCTTGGATGGCGGCT  
CAGGATCAGCCTCATGAAAACCTTATATTCCCTGAGGAGGTTCTACCACGTGGAACGCTCTT---  
ATGTCTGGAAGCACGGGAGAACGTTCTTTGCTGATATTATCACCAGTATTCGATACTGGGTCAATTCATAGCATTACTAT  
ACCTTCCCTATTTCATGCGGGTTGGTTATTCGTGAGCAGGGTTTAGCTTACGATGTATTTGGAAGCCCTCGGCCAAACG  
AGTATTTACAGAGAGCCGACAAGGGATTCTTTAATAACTGGCCGTTTTGATTCTTTGGAACAACCTCGATGAATTTAGT  
AGATCTTTT---  
ATGACTATAGATCGAACTTATCCAATTTTTACAGTGCAGTGGTTGGCTGTTTACGGACTAGCTGTGCCTACTGTTTCTTT  
TTTGGGGTCAATATCAGCAATGCAGTTCATCCAACGA-----  
ATGGCTACACAAACCATTGAGGATAGT---TCT---AGATCTGGG-----  
CCAAGACGAACACTACAGGGAGTTTATTGAAACCATTGAATTCGGAATATGGTAAAGTAGCTCCTGGATGGGGAACTAC  
CCCCTTTATGGGGTTCGCAATGGCTCTATTTGCGATATTCTATCTATTATTTGGAGATTTATAATTCTTCCGTCTTAC  
TGGATGGAATTTCAATGAAT-----  
ATGCTTACTCTCAAACCTCTTCGTTTACACAGTAGTAATATTCTTTGTTTCTCTTTCATCTTCGGATTCTATCTAATGA  
TCCAGGACGTAATCCTGGA---CGTGAGGAA-----  
ATGGCCGATACTACTGGAAGGATTCTCTTTGGCTGATAGGTACTGTAACCTGGTATTCTGTGATCGGTTCAATAGGTAT

TTTCTTTTACGGTTCATATTCCGGATTGGGCTCATCCCTG-----ATGCTT-----  
AATATCTTTAGTTTCATTTTTATCTGTCTTAATTCTTCCCTT---CATTG-----  
AGTAGTTTTTTCTTCGCCAAATTGCCCGAGGCTTATGCTTTTTTCAATCCAATCGTGGATGTTATGCCAGTCATACCTGT  
GTTCTTTTTTCTCTTAGCCCTTGTGGCAAGCTGCTGTAAGTTTTCGA---ATGACACAATCA-----  
AACCCGAACGAACAAAATGTTGAATTGAATCGTACCAGTCTCTACTGGGGATTATTACTTATTTTTGTGCTTGCTGTTTT  
ATTTTCCAATTATTTCTTCAAT---ATG---  
GAAGTCAATATTCTCGCATTATTGCTACTGCATTGTTTATTCTAGTTCCTACTGCTTTTTTACTTATCATCTACGTAAA  
AACAGTCAGTCAAAAT-----GAT-----  
ATGGAAACAGCAACCCTAGTCGCCATCTCCATATCTGGTTCACTTGTAAAGCTTTACTGGGTACGCCTTATATACCGCTTT  
TGGGCAA---CCCTCTCAACAACCTAAGAGATCCATTTCGAGGAACACGGGGAC---  
ATGGAAGCATTGGTTTTATACATTTCTGTTAGTCTCGACTCTAGGGATAATTTTTTTCGCTATCTTTTTTTCGAGAACCACC  
CAAGGTTCCG-----ACTAAAAGATGAAA---  
ATGACTATTGCTTTCCAATTGGCTGTTTTTGCATTAATTGCTACTTCATCAATCTTATTGATTAGTGTACCCGTTGTATT  
TGCTTCTTCTGATGGTTGGTCAAGTAACAAAATGTTGTATTTTCCGGTACGTCGTTATGGATTGGATTAGTCTTTCTGG  
TAGCTATCCTTAATTCTCTCATCTCT---  
ATGTCACCACAAACAGAGACTAAAGCAAGTGTGGATTCAAAGCTGGTGTAAAGAGTACAAATTAATTTATTATACTCC  
TGACTATGAAACCAAAGATACTGATATCTTGGCAGCATTCCGACTAACTCCTCAACCCGGAGTTCCACCTGAGGAAGCAG  
GGGCTGCGGTAGCTGCTGAATCTTCTACTGGTACATGGACAACCTGTGTGGACCGATGGACTTACCAGCCTTGATCGTTAC  
AAAGGACGATGCTACCACATCGAGCCCCTTGGCTGGGGAGGAAAATCAATACATTGCTTATGTAGCTTACCCTTTAGACCT  
TTTTGAAGAAGGTTCTGTTACTAACATGTTTACTTCCATTGTGGGTAATGTATTTGGGTTCAAAGCCCTACGAGCTCTAC  
GTCTGGAGGATCTGAGAATTCCTCCTGCTTATACCAAAACTTTCCAAGGCCCGCCCATGGCATCCAAGTTGAGAGAGAT  
AAATTGAACAAGTATGGTCGTCCTTATTGGGATGTACTATTAACCAAATTTGGGGTTATCTGCCAAGAACTATGGTAG  
AGCGGTTTATGAATGTCTCCGCGGTGGACTTGATTTTACCAAGGATGATGAGAACGTGAACTCCCAACCATTTATGCGTT  
GGAGAGACCGTTTTCGTATTTTGTGCCGAAGCCCTTTATAAAGCGCAGGCCGAAACCGGTGAAATCAAA-----  
GGACATTACTTGAATGCTACTGCAGGTACATGCGAAGAAATGATCAAAAGGGCCGTATTTGCCAGAGAATTGGGAGTTCC  
TATCGTAATGCATGACTACTTAACAGGGGGATTCACTGCAAATACTAGCTTGGCTCATTATTGCCGAGACAACGGCCTAC  
TTCTTCACATCCATCGCGCAATGCATGCAGTTATTGATAGACAAAAGAATCATGGTATACACTTTC

Citrus

CTAGGCTGGGGGGTAGGTCCTGGTGGGGAAGTTATAGACACCTTTCCATACTTTGTATCTGGAGTACTTCACTTAATTT  
CCTCTGCAGTATTGGGCTTTGGCGGTATTTATCATGCACTTCTGGGACCTGAGACTCTTGAAGAATCTTTTCCATTCTTC  
GGTTATGTATGGAAAGATAGAAAATAAAATGACCACAATTTTGGGTATTACCTAATCTTGTAGGTATAGGTGCTTTTCT  
TCTAGTATTCAAGGCTCTTTATTTTGGGGGCGTGTATGATACCTGGGCTCCGGGGGGG-GGGGAGATG--  
TTAAGAAAATACCAACTTGACCCTTAGCCCAAGTGTATTTTGGTATTACTAAAATCCTTCTTTGGAGGAGAGGG  
GTGGATTGTTAGTGTGGATGATTTGGAAGATATAATTGGAGGTCATGTATGGTTAGGTTCC---  
ATTTGTATATTTGGTGGAACTTGGCATACTTAAACCAAGCCTTTTGCATGGGCTCGCCGTGCACCTGTATGGTCTGGGGA  
GGCTTACTTGTCTTATAGTTTGGTGTCTTGGCTGTTTTTGGTTTTTATTGCTTGTGCTTTGTCTGGTTCAATAATACCG  
CTTATCCTAGTGAGTTTTATGGTCCCCTGGGCCAGAAGCTTCTCAAGCTCAAGCATTACTTTTCTGGTTAGAGACCAA  
CGTCTTGGGGCTAATGTGGGATCCGCTCAAGGGCCTACTGGTTAGGTAAATATCTAATGCGTTCCCCTACTGGAGAAGT  
CATTTTTGGGGGAGAACTATGCGTTTTTGGGATCTGCGTGTCCATGGTTAGAACCTTAAGGGGTCCAACGGTTTAG  
ACTTGAGTAGGTTGAAAAGGACATACAA---  
CCTTGGCAAGAACGACGTTCTGCGGAATATATGACTCATGCTCCTTTAGGTTCTTTAAATTTCTGTGGGTGGAGTAGCTAC  
CGAGATCAATGCAGTTAATTATGTCTCTCCGAGAACTTGGTTATCTACTTCTCATTTTGTTCTAGGCTTCTTCTTCTTCG  
TAGGTCACTTATGGCACGCGGGAAGAGCTCGTGCAGCTGCAGCAGGGTTGAAAAGGAATTGATCGTGATTTTGAACCT  
GTTCTTTTCGATGACTCCTATTAAC-----  
ATGACTATAGCCCTTGGTAAATTTACCAAAGAGGAA-----  
AAGGATTTTATTGATATTATGGATGACTGGTTACGGAGGGACCGATTGCTTTTTGTAGGTTGGTCTGGCCTATTGCTCTT  
TCCTTGTGCCTATTTTCGCTTTAGGGGTTGGTTACAGGCACAACCTTTGTAACCTTCATGGTATACCCATGGATTAGCCA  
GTTCTTATTTGGAAGGCTGCAACTTCTTAAACCGCCGAGTTTCGACTCCTGCTAATAGTTTAGCGCATTCTTTGTTGTTA  
CTATGGGGTCTGAAGCACAAGGAGATTTTACTCGCTGGTGTCAATTAGGCGGTCTTTGGACTTTTGTGCTCTACACGG  
TGCTTTCCGACTAATAGGTTTTCATGTTACGTCAATTTGAACTTGTCTGCTCTGTTCAATTGCGACCTTATAATGCAATAG  
CATTCTCTGCTCCAATTGCTGTTTTTGTCTGTTTCTGATTTATCCACTAGGTCAGTCTGGTTGGTTCTTTGCGCCT  
AGTTTTGGTGTAGCGCGATATTTTCGATTCATCCTTTTTTCCAAAGGGTTTTCATAATTGGACATTGAACCCCTTTCATAT  
GATGGGAGTTGCCGGTGTATTGGGCGCTGCTCTGCTATGTGCCATTTCATGGCGCTACCGTAGAAAATACTTTATTTGAAG  
ATGGTGTATGGTGCAAACACATTCCGTGCTTTTAAACCAACGCAAGCCGAAGAAACCTATTTCGATGGTCACCGCTAACCGC  
TTTTGGTCTCAAATCTTTGGGGTTGCTTTTTCCAATAAACGTTGGTTACATTTCTTTATGTTATTTGTACCAGTAACCGG  
TTTATGGATGAGTGTCTTTGGAGTAGTCGGCCTAGCCCTGAACCTACGTGCTTATGACTTCGTTTTCCAGGAAATCCGTG  
CAGCGGAAGATCCTGAATTTGAGACTTTCTACACAAAAAATATTCTTTTAAACGAGGGTATTTCGTGCTTGGATGGCGGCT

CAAGATCAGCCTCATGAAAACCTTATATTCCTGAGGAGGTTCTACCCCGTGGAAACGCTCTT---  
ATGTCTGGAAGCACAGGAGAACGTTCTTTTGGCTGATATTATTACCAGTATTCGATACTGGGTCATTCATAGCATTACTAT  
ACCTTCCCTATTTCATTGCGGGTTGGTTATTTCGTGAGCAGGGGTTAGCTTATGATGTGTTTGAAGCCCCCGGCCAAACG  
AGTATTTTACAGAGAGCCGGCAAGGAATTCATTAATAACCGGCCGTTTTGATTCTTTGGAACAACCTCAATGAATTTAGT  
AGATCTTTT---  
ATGACCATAGATCGAACCTATCCAATTTTTACAGTGCATGGTTGGCTGTTACGGACTAGCTGTACCTACCGTTTTCTTT  
TTTGGGGTCAATATCAGCAATGCAGTTCATCCAACGC-----  
ATGGCTACACAAACAGTTGAGGGTAGT---TCT---AGAGCTCGT-----  
CCAAAAAGAACTTCTGCAGGGGGGTTGTTGAAACCCCTTGAATTCGGAATATGGTAAAGTAGCTCCTGGATGGGGAACCTAC  
TCCTTTGATGGGAGTCGCAATGGCTTTATTTGCGGTATTCCTATCTATTATTTGGAGATTTATAATTCGTCCGTTTTAC  
TGGACGGAATTTCACTGAAT-----  
ATGCTTACTCTCAAACCTTTTGTGTTACACCGTAGTGATATTCTTTGTTTCGCTCTTCATCTTCGGATTCTGTCTAATGA  
TCCAGGGCGTAATCCCGGA---CGCGAAGAA-----  
ATGGCCGATACTACTGGAAGGATTCCCCTTTGGATAATAGGAACTGTAAGTGGTATTCTGTGATCGGTTTAAATAGGCAT  
TTTCTTTTATGGTTCATATTCCGGATTAGGTTTCGCTCTTG-----ATGCTT-----  
AATATCTTTAGTTTAAATGTATATCTGTCTTAATTCTGCCCTT---TATTCG-----  
AGTAGTTTTTTTATTTCGCTAAATTACCCGAGGCCTACGCTTTTTTGAATCCAATTGTAGATGTTATGCCAGTAATACCTGT  
TCTATTTTTTCTCTTAGCCTTTGTTTGGCAAGCTGCTGTAAGTTTTTCGA---ATGACACAATCA-----  
AACCCAAACGAACAAAATGTTGAATTGAACCGTACCAGTCTCTACTGGGGGTTATTGCTCATTTTTTGTACTTGCTGTTTT  
ATTTTCCAATTACTTCTTCAAT---ATG---  
GAAGTAAATATTCTCGCATTATTGCTACTACACTGTTTCGTTCTAGTTCCTACTGCGTTTTTGTATAATATACGTAAA  
AACGGTCAGTCAAAGT-----GAT-----  
ATGGAAACAGCAACCCTAGTCGCCATCTCTATATCTGGGTTACTTGTAAAGTTTTACTGGGTACGCCTTATATACTGCTTT  
TGGGCAA---CCCTCTCAACAATAAGAGATCCATTTCGAGGAACACGGGGAC---  
ATGGAAGCATTGGTTTATACATTCTCTTAGTCTCGACTCTAGGGATCATTTTTTTTCGCTATCTTTTTTTCGAGAACC GCC  
TAAAGTTCCA-----ACTAAAAAAACAAAA---  
ATGACTATTGCTTTCCAATTGGCTGTTTTTGCATTAATTGCTACTTCATCAATCTTACTGATTAGTGTACCCGTTGTATT  
TGCTTCTCCGGATGGTTGGTCGAGTAACAAAAATGTCGATTTTTCTGGTACATCATTGTGGATTGGATTAGTCTTTCTGG  
TGGGTACTCTTAACTCTCTCATTCT---  
ATGTCACCACAAACAGAGACTAAAGCGAGTGTGGATTCAAGGCCGGTGTAAAGATTATAAATTGACTTATTATACTCC  
TGACTATGTAACCAAAGATACTGATATCTTGGCAGCATTCCGAGTAACCTCCTCAGCCCGGAGTTCCACCCGAGGAAGCGG  
GGGCTGCGGTAGCTGCGGAATCTTCTACTGGTACCTGGACAGCTGTGTGGACCGATGGGCTTACCAGCCTTGATCGTTAC  
AAAGGGCGATGCTACAACATTGAGCCCGTTGCTGGAGAAGAGAATCAATATATATGTTATGTAGCTTACCAGCTTAGACCT  
TTTTGAAGAAGGTTCTGTTACTAACATGTTTACTTCCATTGTGGGTAATGTATTTGGTTTCAAAGCACTGCGCGCTCTAC  
GTCTAGAGGATCTACGAATCCCTCCTGCGTATACTAAAACCTTTCCAAGGCCCGCCTCACGGCATCCAAGTTGAGAGAGAT  
AAATTGAACAAGTATGGCCGTCCTGTTGGGATGTACTATTAACCTAAACTGGGGTTATCCGCGAAGAATTATGGTAG  
GGCGGTTTATGAATGTCTACGTGGTGGACTTGACTTTACCAAAGATGATGAGAACGTGAACCTCCAACCATTTATGCGTT  
GGAGGGACCGTTTCTTATTTTTGTGCGGAAGCTCTTTATAAAGCGCAAGCTGAAACAGGTGAAATCAAA-----  
GGTCATTACTTGAATGCTACTGCAGGGACATGCGAAGAAATGCTAAAAGGGCTGTCTTTGCCAGAGAGTTGGGAGTTCC  
TATCGTAATGCATGACTACTTAAACAGGGGGATTACCAGCAATACTACCTTGGCTCATTATTGCCGAGATAATGGTCTAC  
TTCTTACATCCACCGTGCAATGCATGCAGTTATTGATAGACAGAAGAATCATGGTATGCACCTTC

Coffea

TCTAGGTTGGGGGGTAGGCCCTGGGGGGGAAGTTATAGACACCTTTCCATACTTTGTATCTGGAGTACTTCATTTAATTT  
CCTCTGCGGTTTTGGGCTTTGGAGGTATTTACCACGCACTTCTGGGTCCTGAGACGCTTGAAGAATCTTTTCCATTCTTC  
GGTTATGTATGGAAAGATAGAAATAAAATGACCACAATTTAGGTATTCATTAATCTTGTAGGTATAGGTGCTTTTCT  
TCTAGTATTCAGGCTCTATATTTTTGGGGCGGTGATGATACCTGGGCTCCGGGAGGG---GGAGATG---  
TAAGAAAAATTACCAATTTGACCCTTAGCCAGGTATCATTTTTTGGTTATTTACTAAAATCCCCTTTTGGAGGGGAGGGT  
TGGATTGTTAGTGTGGACGATTTAGAAGATATAATCGGCGGACATGTATGGTTAGGTTTCG---  
ATTTGTATACTTGGTGAATCTGGCATACTTAAACCAAACCTTCGCGTGGGCTCGGCGCGCACTTGTATGGTCTGGAGA  
GGCTTACTTATCTTATAGTTTGGGGCTTTATCCATCTTTGGTTTCACTGCTTGTGTTTTGTCTGGTTCAATAATACCG  
TCTATCCTAGTGAGTTTTACGGACCTACTGGGCCAGAAGCTTCTCAAGCCCAAGCATTACTTTTTTGTAGTTAGAGACCAA  
CGTCTTGGGGCTAATGTGGGATCCGCCAAGGGCCTACTGGTTTAGGTAAATATCTAATGCGTTTCGCCAACCAGGAGAAGT  
CATTTTTTGGAGGAGAAACCATGCGTTTTTGGGACCTGCGCGCTCCCTGGTTAGAACCTTTAAGAGGTCCAAATGGGTTGG  
ACTTGAGTAGGTTGAAAAAAGACATACAA---  
CCTTGGCAAGAACGGCGTTCCGCAGAATATATGACTCATGCCCTTTAGGTTCTTTAAATTCGGTGGGTGGCGTAGCTAC  
CGAGATCAATGCAGTCAATTATGTCTCTCCTAGAAGTTGGTTAGCTACCTCTCATTTTTTGTTCTAGGATTCTTCTTCTTCG  
TGGGTCATTTATGGCATGCGGGAAGGGCTCGTGCAGCTGCAGCAGGATTTGAAAAGGGAATTGATCGTGATTTTGAACCT

GTCCTTTCAATGACCCCGCTTAAT-----  
ATGACTATAGCCCTTGGTAAATTTACCAAAGACGAA-----  
AATGATTTATTTGATATTATGGATGACTGGTTACGTAGGGACCGTTTTCGTTTTTGTAGGCTGGTCCGGCCTATTGCTCTT  
TCCTTGTGCCTATTTTCGCTTTAGGGGGTGGTTACAGGTACAACCTTTGTAACCTTCATGGTATACCCACGGGTTAGCCA  
GTTCCCTATTTGGAAGGCTGCAATTTCTTAACTGCCGCAGTTTCTACTCCTGCTAATAGTTTAGCACATTCTTTGTTGTTA  
CTATGGGGCCCTGAAGCACAAGGAGATTTTACTCGTTGGTGTCAATTAGGCGGTCTGTGGACTTTTGTGCTCTCCACGG  
CGCTTTTGGATTAATAGGTTTCATGTTACGTCAATTCGAACCTTGCTCGATCTGTTCAATTGCGACCTTATAATGCAATCG  
CATTCTCTGCCCAATTGCCGTTTTTGTCTGTATTCTCATTATCCACTAGGTGAGTCTGGTTGGTTCTTTGCGCCT  
AGTTTTGGTGTAGCAGCTATATTTGATTTCATCCTCTTTTTTCAAGGGTTTTATAATTGGACATTGAACCCATTTTCATAT  
GATGGGAGTTGCCGGTGTATTGGGCGCTGCTTTTGTCTATGCGCTATTCATGGTGTACTGTAGAAAATACTTTATTTGAAG  
ATGGTGATGGTGCAAATACATTTCCGTGCTTTTTAACCCAAACGCAAGCCGAAGAAACTTATTCAATGGTACCAGTAACCGC  
TTTTGGTCCCAAATCTTTGGGGTTGCTTTTTCAATAAACGTTGGTTACATTTCTTTATGTTATTTGTACCAGTAACCGG  
TTTATGGATGAGTGCTCTTGGAGTAGTCGGTTTTGGCCCTGAATCTACGTGCCTATGATTTTCGTTTTCTCAGGAAATTCGCG  
CAGCGGAAGATCCGGAATTTGAAACTTTCTACACCAAAAATATTCTCTTAAATGAGGGTATTTCGTGCTTGGATGGCAGCT  
CAAGATCAGCCTCATGAAAACCTTATATTCCCTGAGGAGGTTTACCACGTGGAACGCTCTT---  
ATGTCTGGAAGCACAGGAGAACGTTCTTTTGTGATATTATTACCAGTATTCGATACTGGGTGATTTCATAGCATTACAAT  
ACCTTCCCTATTCATTGCTGGTTGGCTATTCGTGAGCACCAGTTTTAGCTTATGATGTGTTTGAAGCCCTCGGCCAAACG  
AGTATTTACAGAAAGCCGGCAGGGAATTCATTAATAACTGGCCGTTTTGATCCTTTGGAACAACCTTGATGAATTTAGT  
AGATCTTTT---  
ATGACTATAGATCGAACCTATCCAATTTTTACAGTACGATGGTTGGCTGTTACCGCCTAGCTGTACCTACCGTCTTTTT  
TTTAGGATCAATTTAGCAATGCAGTTCATCCAACGA-----  
ATGGCTACACAAACTGTTGATAACAGT---TCT---AGATCTGGT-----  
CCAAGACGAACACTGTAGGGAGTTTATTAACCATTGAATTCAGAATATGGTAAAGTAGCTCCGGGGTGGGGAACAAC  
CCCTTTGATGGGTGTGCAATGGCTCTATTTGCGGTATTTCTATCTATTATTTGGAGATTTATAATTCTTCCGTTTTAT  
TGGATGGAATTTCAATGAAT-----  
ATGCTTACTCTCAAACCTCTCGTTTTACACAGTAGTGATATTTTTTGTCTCTCTTTCATCTTTGGATTCCCTATCTAATGA  
TCCCGGGCGTAATCCTGGG---CGTGAAGAA-----  
ATGGCCGATACTACTGGAAGAATTCCTCTTTGGATAGTAGTACTGTAACCTGGTATTCTTGTGATCGGTTTAATAGGTGT  
TTTTTTTTTATGTTTATTTCCGATTCCGGATTGGGTTTCATCCCTG-----ATGCTT-----  
AATATTTTTAGTTAATCTGGATCTGTCTTAATTCTGCCCTT---TATTG---  
AGTGGTTTTTTCTTCGAAAATTGCCCGAGGCTATGCTTTTTTGAATCCAATCATAGATTTTATGCCAGTCATACCTGT  
CTTCTTTTTTTTATTAGCTTTTGTGGCAAGCTGCTGTAAGTTTTCGA---ATGACACAATCA-----  
AACCCGAACGAACAAAATGTTGAATTGAATCGTACCAGTCTATACTGGGGGTTATTACTCATTTTTTGTACTTGCTGTTTT  
ATTTTCCAATTATTTCTTCAAT---ATG---  
GAAGTAAATATTCTTGCATTTATTGCTACTGCACTATTCATTCTAGTTTCTACGGCCTTTCTACTTATAATTTACGTAAA  
AACAGTCAGTCAAAAAT-----AAT-----  
ATGGAACAGCAACCCTAGTAGCCATCTTTATATCTGGTTTACTTGTAAAGTTTTACCGGGTACGCCTTATATACCGCTTT  
TGGGCAA---CCTTCTCAACAACCTAAGAGATCCGTTTGGGAACATGGGGAC---  
ATGGAAGCACTGGTTTATACATTCCTCTTAGTCTCGACTCTAGGGATAATTTTTTTTCGCTATCTTTTTTCGAGAACCTCC  
TAAAGTTCCA-----ACTAAAAAGATAAAA---  
ATGACTCTTGCTTTCCAATTGGCTGTTTTTGCACATAATTGCTACCTCATCAATCTTATTGATTAGCGTGCCCGTTGTATT  
TGCTTCTCCTGATGGTTGGTCAAGTAACAAAATGTTATATTTTCTGGTACATCATTATGGATTGGCTTAGTCTTTCTAG  
TTGGTATCCTTAATTCTCTCATCTCT---  
ATGTCACCACAAACAGAGACTAAAGCAAGTGTGGATTCAAAGCTGGTGTAAAGAGTACAAATTGACTTATTATACTCC  
TGAATACGAAACCAAAGATACTGATATCTTGGCAGCATTCCGAGTAACTCCTCAACCGGGAGTTCCACCTGAAGAAGCGG  
GGGCCGCGGTAGCTGCCGAATCTTCTACTGGTACATGGACAGCTGTGTGGACCGATGGGCTTACCAGCCTTGATCGTTAC  
AAAGGGCAGTACTACATCGAGCCAGTTTCTGGGGAAGAAAATCAATATATTGCTTATGTAGCTTACCCCTTAGACCT  
TTTTGAAGAAGTTCTGTTACTAACATGTTTACTTCCATTGTAGGTAATGTATTTGGGTTCAAAGCCCTGCGCGCTCTAC  
GTCTGGAAGATTTGCGAGTCCACCTGCTTATATTAACCTTCCAAGGGCCGCTCATGGCATCCAAGTTGAGAGAGAT  
AAATTGAACAAGTATGGTGTGCTCCCTGTTGGGATGTAATAAACCCTAAATTAGGTTTATCTGCTAAAACTATGGTAG  
AGCTGTTTATGAATGTCTTCGCGGGGACTTGATTTTACCAAAGACGATGAAAACGTGAACTCCCAACCATTTATGCGTT  
GGAGAGATCGTTTTCTGCTTTTGTGCTGAAGCGCTTTTTAAAGCACAGGCTGAAACAGGTGAAATCAA-----  
GGGCATTACTTGAATGCTACTGCAGGTACATGCGAAGAAATGATCAAAAGAGCTGTATTTGCTAGAGAATTAGGAGTTCC  
TATCGTAATGCATGATTACTTAACAGGGGGATTACTGCAAATACTAGCTTGGCCATTATTGCCGAGATAATGGCCTAC  
TTCTTACATCCACCGCGCAATGCATGCGTTATTGATAGACAGAAGAATCATGGTATGCACCTCC  
Cucumis  
TTTAGGTTGGGGGTAGGTCCTGGTGGGAAGTTATAGACACCTTTCCTTACTTTGTGTCTGGAGTACTTCACTTAATTT



CCTCCGCAGTATTGGGTTTTGGCGGTATTTATCATGCACTTCTGGGACCCGAGACCCTTGAAGAATCTTTTCCATTCTTC  
GGTTATGTGTGGAAAGATAGAAATAAAATGACTACCATTTTGGGTATTCACTTAATTTTGGTTAGGTATAGGTGCTTTTTCT  
TCTAGTATTCAAAGCTCTTTATTTTGGGGCGTATATGATACCTGGGCTCCCGGGGG---GGAGATG---  
TAAGAAAAATTACCAACTTGACCCTTAGCCCAAGTGTTATATTTGGTTATTTACTAAAATCTCCTTTTTGGCGGAGAAGGA  
TGGATTGTTAGTGTGGACGATTTGGAAGATATAGTTGGGGGACATGTATGGTTAGGTTC---  
ATTTGTATACTTGGTGGAAATTTGGCATATCTTAACTAAACCCTTTGCATGGGCTCGCCGCGCACTTGTATGGTCTGGAGA  
AGCTTACTTGTCTTATAGTTTGGTGTCTTTATCTGTTTTTGGTTTTTATTGCTTGTGTGTGTCTGGTTCAATAATACTG  
CTTATCCGAGTGAATTTACGGGCCGACTGGACCAGAAGCTTCTCAAGCTCAAGCATTACTTTTTCTAGTTAGAGACCAA  
CGTCTTGGAGCTAACATTGGATCCGCTCAAGGACCTACTGGTTTTAGGTAAATATCTAATGCGTTCTCCGACCAGGAGAAGT  
CATTTTGGGGGAGAGACTATGCGTTTTGGGATCTGCGTGTCCGTGGTTAGAACCCTAAGGGGCTCTAATGGTTTGG  
ACTTGAGTAGACTGAAAAAAGACATCCAAA--CCTTGGCAAGAACGACGTTCCGCGGAATATATGACC-  
TGCTCCTTTAGGTTCTTTAAATCCGTGGGGGCGTAGCTACCGAAATTAATGCAGTCAATTATGCTCTCTCTCTCTAGAAGT  
GGTTAGCTACCTCTCATTCTTGGTTCTAGGATTCTTCTTATTGCTAGGTCATTTATGGCATGCAGGAAGGGGCTCGTGCAGCT  
GCCGAGGATTTGAAAAAGGAATTGATCGTGATTTTGAACCTGTTCTGTTTCATGACTCCTCTTAAAC-----  
-----ATGACTATAGCCGTTGGTAAATTTACCAAGACGAA-----  
AATGATTTATTTCGATATTATGGATGACTGGTTACGGAGGGACCCTTTCGTTTTGTAGGTTGGTCCGGTCTATTGCTCTT  
TCCTTGTGCCTATTTTGGCGTCGGAGGTTGGTTTACAGGTACAACCTTTGTAACCTTTCATGGTATACCCATGGATTGGCAA  
GTTTCTATTTGGAAGGATGCAACTTCTTAAACCGCCGAGTTCGACTCCTGCTAATAGTTTAGCCACTCTTTGTTGTTA  
CTATGGGGCCCTGAAGCACAAAGGAGATTTACTCGTTGGTGCAATTAGGTGGTCTGTGGACTTTTGTTGCTCTCCACGG  
TGCTTTCGGACTAATAGTTTTATGTTTACGTCAATTTGAACTTGTCTGATCTGTTCGAATTGCGACCTTATAATGCAATCG  
CATTCTCGGGCCCAATTGCTGTTTTTGTCTGTATTCTGATTTATCCACTAGGTCAGTCTGGTTGGTTCTTTGCGCCT  
AGTTTTGGTGTAGCAGCTATATTTTCGATTCATCCTATTTTTCCAAGGGTTTCATAATTGGACATTGAACCCATTTTCATAT  
GATGGGAGTTGCGGGGGTATTGGGCGCTGCTCTGCTATGCGCTATTCATGGTGTACCCTAGAAAATACCTTATTTGAGG  
ATGGGGATGGTGC AAATACATTCCGTGCTTTTTAACCCTACTCAAGCTGAAGAACTTATTCAATGGTCACTGCTAACCCGC  
TTTTGGTCCCAATCTTTGGGGTTGCTTTTTCCAATAAACGTTGGTTACATTTCTTTATGTTATTTGTACCAGTAACTGG  
TTTATGGATGAGTGTCTTTGGAGTAGTTGGTCTGGCCCTGAACCTACGTGCCTATGACTTCGTTTTCTCAGGAAATCCGTG  
CAGCGGAAGATCCGGAATTTGAGACTTTCTATACCAAAAATATCTCTTAAACGAAGGATTTGCGTCTGGATGGCGGCT  
CAAGATCAGCCTCATGAAAACCTTATATCCCTGAGGAGGTTCTACCCCGTGGAAACGCTCTT---  
ATGTCTGGAAGCACAGGAGAAGCTTCTTTTGTGATATTATCACCAATTTCGATACTGGGTCATTTCATAGCATTACTAT  
ACCTTCTCTATTTCATTGCAGTTGGTTATTCGTGACACGGGTTAGCTTACGATGTTTTTGAAGCCCTCGTCCAAATG  
AGTATTTTACAGAGCCGACAAGGAATTCATTAATAACTGGCCGTTTTGATTCTTTGGAACAACCTCGATGAATTTAGT  
AGATCTTTT---  
ATGACTATCGATAAAACTTATCCTATTTTTTACAGTGCATGGTTAACTGTTCACGGACTAGCTGTACCTACCGTTTTCTTT  
TTTAGGGTCAATATCAGCAATGCAATTCATCCAACGA-----  
ATGGCTACACAAACCGTTGACGATAGT---TCT---AAATCTGGG-----  
CCAAGACGAAGTGTGTTAGGGGATTTATTTGAAACCATTGAATTCGGAATATGGTAAAGTGGCTCCTGGGTGGGGAACTAC  
ACCTTTAATGGGTGTCGCGATGAGTTTATTTGCGATATTCCTATGTATTATTTGGAGATTTATAATCTTCCATTTTAC  
TGGACGGAATTTCAAGCAAT-----  
ATGCTTACTCTCAAACTATTTGTTTTATACAGTAGTAATATTCTTTGTTTCTCTCTTTCATTTTTCGATTTCCTATCTAATGA  
CCC GGACGTAATCCGGGG---CGTGAAGAA-----  
ATGGCCGAGACTACTGGAAGGATTTCCTCTTTGGCTAATCGGTACTGTAAGTGGTATTCCTGTGATCGGTTTTAGTCCGTGT  
TTTCTTTTATGGTTTCATATTCGGCTTAGGTTTCATCTCTG-----ATGCTT-----  
AATATCTTAAGTTTCATCGGTATCTGTCTTAAATCTTTCCTT---TATTCA-----  
AGTAGTTTTTTCGTCGCAAATTTGCCGAGGCTACGCTTTTTTGAATCCAATAGTAGATGTTATGCCAGTAATACCTCT  
ATTCTTTTTTCTATTAGCTTTTGTGTTGGCAAGCTGCTGTAAGCTTTTCGA---ATGACACAATCA-----  
AATCCGAACGAACAAAATGTTGAATTTGAATCGTACCAGTCTTTACTGGGGTTATTACTCATTFTTGTACTTGCTGTTTT  
ATTTTCAATTATTTCTTCAAT---ATG---  
GAAGTAAATATTCTCGCATTTATTGCTACTGCCTGTTTCATTCTAGTTCCGACCAGCTTTTTTACTTATAATATACGTAA  
AACAATCAGTCAAAGT-----GAT-----  
ATGGAAACAGCAACCCTAGTTGCCATCTCTATATCTGGTTTTACTTGTAAAGTTTTACTGGGTATGCCTTATATACTGCTTT  
TGGGCAA---CCCTCTCAACAATAAGAGATCCATTGAGGAACACGGGGAC---  
ATGGAAGCATTGGTTTATACATTCCTCTTAGTCTCGACTCTAGGAATAATTTTTTTTCGCTATCTTTTTTTCGCGAACCGCC  
TAAAGTTCAGTTCCA---ACTAAAAGGCGAAA---  
ATGACTATTGCTTTCCAATTGGCTGTTTTTGCATTAATTGCTACTTTCATTAATCTTACTGATTAGTGTACCCGTTGTATT  
TGCTTCTCTGACGTTGGTTCAGTAACAAAAATGTTGTATTTCTGGTACATCATTATGGATTGGATTAGTCTTTTCTGG  
TGGGTATCCTTAAATCTCTCATCTT---  
ATGTCACCACAAACAGAGACTAAAGCAAGTGTTGGATTCAAAGCTGGTGTAAAGATTATAAATTGACTTATTATACTCC

TGAATATGAAACCAAAGATACTGATATCTTGGCAGCATTCCGAGTAACTCCTCAACCGGGAGTTCCACCTGAGGAAGCAG  
GGGCCGCTGTAGCTGCTGAATCTTCTACTGGTACATGGACAACCTGTGTGGACCGATGGGCTTACCAGTCTTGATCGTTAC  
AAAGGACGATGCTATGGAATCGAGCCTGTTGCTGGAGAAGAAAATCAATATATTGCTTATGTAGCTTATCCTCTAGACCT  
TTTTGAAGAAGGTTCTGTTACTAACATGTTTACTTCCATTGTGGGTAATGTATTTGGATTCAAGGCTCTACGTGCTCTAC  
GTCTGGAGGATTTGCGAATCCCTACTGCTTATATTA AAACTTTCCAAGGCCCGCCTCATGGTATCCAGGTTGAAAGAGAT  
AAATTGAACAAGTATGGTGCCTCTATTGGGATGTACTATTAACCAAAAATTGGGATTATCCGCTAAGAATTATGGTAG  
AGCAGTTTATGAATGTCTACGCGGTGGACTTGATTTTACCAAAGATGATGAAAACGTGAATTCCCAACCATTTATGCGTT  
GGAGAGACCGTTTCTATTTTGTGCGGAAGCTATTTTTAAATCACAGGCTGAAACAGGTGAAATCAAAGACATA-----  
---

CTGAATGCTACTGCGGGTACATGCGAAGAAAATGATGAAAAGGGCTATATTTGCCCGAGAATTGGGAGCTCCTATCGTAAT  
GCATGACTACTTAAACAGGTGGATTCACTGCAAATACTAGCTTGGCTCATTATTGCCGAGATAATGGTCTACTTCTTCACA  
TTCACCGTGAATGCATGCTGTTATTGATAGACAGAAGAATCATGGTATGCACTTCC

Daucus

TCTAGGTTGGGGAGTAGGTCCTGGTGGGGAAGTTATAGACACTTTTCCATATTTTGTATCTGGAGTACTTCATTTAATTT  
CCTCTGCAGTATTGGGCTTTGGTGGTATTTATCATGCACTTCTAGGACCTGAGACGCTTGAAGAATCTTTTCCATTCTTC  
GGTTATGTATGGAAAGATAGAAAATAAAATGACCACAATTTTAGGTATTCACTTAATCTTGTTAGGTATAGGAGCTTTTCT  
TCTAGTATTCAAGGCTCTTTATTTTGGTGGTGTCTATGATACCTGGGCTCCGGGAGGG---GGAGATG---

TAAGAAAAATTACCAACTTGACCCTTAACCCAAGTATTATTTGGTTATTTACTAAAATCCCCTTTTGGAGGGGAAGGG  
TGGATTGTTAGTGTAGACGATTTGGAAGATATAATCGGAGGACATGTATGGTTAGGTTCC---

ATTTGTATATTTGGTGGAACTGCGCATATCTTAACCAAACCTTTTCGCATGGGCTCGACGCGCACTTGTATGGTCTGGAGA  
GGCTTACTTATCTTATAGTTTACGCGCTTTATCCGTCTTTGGTTTCATTGCTTGTGTTTTGTCTGGTTCAATAATACCG  
CCTATCCTAGCGAGTTTTACGGACCCACTGGACCAGAAGCTTCTCAAGCTCAAGCATTACTTTTCTAGTTAGAGACCAA  
CGGCTGGGGGCTAACGTGGGCTCTGCTCAAGGACCTACCGGTTTAGGTAAATATTTGATGCGTTCTCCCACCGGAGAAGT  
CATTTTGGAGGAGAACTATGCGTTTTTGGGATTTACGTGCCCTTGGTTAGAACCTTAAGGGGTCCAAATGGGTTGG  
ACTTGAGTAGGCTGAAAAAAGACATACAA---

CCTTGGCAAGAACGGCGCTCTGCAGAATATATGACTCATGCCCTTTAGGTTCTTTAAATCCCGTGGGTGGTGTAGCTAC  
CGAGATCAATGCAGTCAATTATGTCTCTCCTAGAAGTTGGTTAGCTACTTCTCATTGTTCTAGGATTCTTCTTGTTCG  
TAGGTCATTTGTGGCACGAGGAAAGGGCTCGTGCAGCTGCAGCGGGGTTGAAAAAGGAATTGATCGTGATTTTGAACCT  
GTTCTTTCCATGACCCCTCTTAAT-----

ATGACTATAGCCCTTGGGAAATTTACCAAAGACGAA-----

AAAGATTTATTTGATATTATGGATGACTGGTTACGGAGGGACCGTTTTCGTTTTTGTAGGATGGTCCGGTCTATTGCTCTT  
TCCTTGTGCCTATTTGCTGTAGGAGGCTGGTTCACAGGTACAACCTTTGTAACCTTCATGGTATACCCATGGATTGGCCA  
GTTCTTATTTGGAAGGCTGCAATTTCTTAACTGCCGCAGTTTCTACTCCTGCTAATAGTTTAGCACATTCTTTGTTGTTA  
CTGTGGGGTCTGAAGCACAAAGGGGATTTTACTCGTTGGTGTCAATTAGGTGGTCTGTGGACTTTTGTGTCCTCCATGG  
TGCTTTCCGACTAATAGGCTTCATGTTACGTCAATTGCAACTTGCTCGATCTGTTCAATTGCGACCTTATAATGCAATCG  
CGTTTTCTGGTCCAATTGCTGTTTTTGTCTGTATTCTGATTTATCCACTAGGACAATCTGGTTGGTTCTTTGCGCCA  
AGTTTTGGTGTAGCAGCTATATTTGATTTCATCCTCTTTTTTCAAGGATTTTATAATTGGACATTAACCCATTTTCATAT  
GATGGGAGTTGCAGGGGATTGGGCGCTGCTTTGCTATGCGCTATTTCATGGTGTACTGTAGAAAATACTTTATTTGAAG  
ATGGTGTATGGTCAAATACATTCCGTGCTTTTAAACCAAACCTCAAGCTGAAGAACTTATTCAATGGTCAACCGCAACCGC  
TTTTGGTCCCAAATCTTTGGGGTTGCTTTTTCCAATAAACGTTGGTTACATTTCTTTATGTTATTTGTACCAGTAACTGG  
TTTATGGATGAGTGTCTTTGGAGTAGTTGGTCTGGCCCTGAACCTGCGCGCCTATGACTTCGTTTTCTCAGGAAATTCGCG  
CGGCAGAAGATCCTGAATTTGAGACTTTCTACACAAAAAATATTCTCTTAAACGAAGGTATTTCGTGCTTGGATGGCGGCT  
CAAGATCAGCCTCATGAAAACCTTATATCCCTGAGGAGGTTCTACCCCGTGGAAACGCTCTT---

ATGTCTGGAAGCACAGGAGAACGTTCTTTGCTGATATTATTACCAGTATTCGCTACTGGGTCAATTCATAGCATTACTAT  
ACCTTCCCTATTCATTGCGGGTTGGTTATTCGTGAGTACCGGTTTAGCGTACGATGTATTTGGAAGCCCTCGGCCAAACG  
AGTATTTACAGAGAACCAGCAAGGAATCCATTAATAACTGGCCGTTTTGATCCTTTGGAACAACCTCGATGAATTTAGT  
AGATCTTTT---

ATGACCATAGATCGAACCTATCCAATTTTTACAGTGCATGTTGGCTGTTTACGGCCTAGCTGTACCTACCGTTTCTTT  
TTTGGGTCAATATCAGCAATGCAGTTCATCCAACGA-----

ATGGCTACACAACTGTTGAGAACGTT---TCT---AGATCGCGT-----

CCAAAACCAACTACTGTAGGGGTTTATTGAAACCACTGAATTCGGAATATGGTAAAGTCGCCCCCTGGGTGGGGAACAGC  
TCCTTTGATGGGTGTGCAATGGCCCTATTTGCAATCTTTCTATCTATTATTTGGAGATTTATAATTCTTCTGTTTTAT  
TGGATGGAATTTCAATGAAT-----

ATGCTTACTCTCAAACCTTTTCTGTTTACACAGTAGTGATATTCTTTGTTTCTCTATTTATTTTGGATTCTATCTAATGA  
TCCGGGGCGTAATCCTGGC---CGTGAAGAA-----

ATGGCTGATACTACTGGAAGGATTCTCTTTGGATAATCGGTACTGTAGCTGGTATTCTTGTGATCGGTTTAAATAGGTAT  
TTTCTTTTATGTTTCATATTCTGGATTGGGTTTCTCTG-----ATGCTT-----

AATATCTTTAGTTTGTATCTGCATCTGTCTTAATTCTGCCTTT---TATTCG-----  
AGTAGTCTTTTTCTTCGCCAAATTGCCCGAGGCCTACGCTTTTTTGAATCCAATCGTAGATCTTATGCCAGTCATACCTTT  
GTTCTTTTTTCTCTTAGCCTTCGTTTGGCAAGCTGCTGTAAGTTTTTCGA---ATGACACAATCA-----  
AACCCGAACGAACAAGATGTTGAATTGAATCGTACCAGCCTCTACTGGGGATTATTACTCATTTTTGTACTTGGCTGTTTT  
ATTTTCCAATTATTTCTTCAAT---ATG---  
GAAGTAAATATTCTTGCATTTATTGCTACTGCCTGTTTCTAGTTTCTACTGCTTTTTCTGCTTATCATTATGTAAA  
AACAGAAACTCAAAATAAA-----AATAAAAAG-----  
ATGGAAACAGCAACCCTAGTCGCCATCTTTATATCTGGTTTACTTGTAAAGTTTTACCAGGTTACGCCTTATATACCGCTTT  
TGGGCAA---CCTTCTCAACAATAAGAGATCCGTTTCGAGGAACATGGGGAC---  
ATGGAAGCATTAGTTTATACATTCCTCTTAGTCTCGACTCTAGGTATAATTTTTTTCGCTATCTTTTTTAGAGAACCACC  
TAAAGTTCCA-----ACTAAAAAG-----  
ATGACTCTTGGCTTTCCAATTGGCTGTTTTTGCATTAATTGCTACTTTCATCAATCTTATTAATTGGCGTACCTGTTGTATT  
TGCTTCTCCTGATGGTTGGTCAAGTAACAAAAATGTTTTATTTTCTGGTACATCATTATGGATTGGATTAGTCTTTCTGG  
TGGGTATCCTTAATTCTCTCATCTCT---  
ATGTCACCACAAACAGAGACTAAAGCAGGTGTTGGATTCAAAGCTGGGGTTAAAGATTACAAATTGACTTATTATACTCC  
TGACTATGAAACCAAAGATACTGATATCTTGGCAGCATTCCGAGTAACTCCTCAACCTGGAGTTCCACCTGAAGAAGCGG  
GAGCCGCGGTAGCTGCCGAATCTTCTACTGGTACATGGACCCTGTGTGGACCGATGGACTTACCAGTCTTGATCGTTAC  
AAAGGGCGCTGCTACGGAATCGAGCCCCTGCTGGAGAAGAAAATCAATTTATCGCTTATGTAGCTTACCCATTAGACCT  
TTTTGAAGAAGGTTCTGTTACTAACATGTTTACTTCTATTGTAGGTAATGTATTTGGGTTCAAAGCCCTGCGCGCTCTAC  
GTCTGGAAGATCTGCGAATTCCTGTTGCTTATGTTAAAACCTTCCAAGGACCGCTCATGGCATCCAAGTTGAGAGAGAT  
AAATTGAACAAGTATGGTCTGCCCTGTTGGGATGTACTATTAACCTAAATTGGGATTATCCGCTAAAAACTACGGTAG  
AGCGGTTTATGAATGTCTCCGCGGTGGACTTGATTTTACCAAAGACGATGAGAATGTGAATCTCAACCATTTATGCGTT  
GGAGAGATCGTTTTCTTATTTTGTGCCGAAGCAATTTATAAAGCACAGGCTGAAACTGGTGAAATCAAA-----  
GGGCATTACTTGAACGCTACTGCGGGTACATGTGAAGAAATGATGAAAAGGGCTATATTTGCCAGAGAATTGGGAGTTCC  
TATCGTAATGCATGATTACTTAAACAGGGGGATTCACTGCAAATACTAGCTTAGCCATTATTGCCGAGATAATGGCCTAC  
TTCTTACATCCACCGCGCAATGCATGCAGTTATTGATAGACAGAAGAATCATGGTATACACTTTC  
Dioscorea  
CTTGGGTTGGGGGTAGGTCCGGGGGGGAAGTTATAGACACCTTTCCCTACTTTGTATCTGGAGTACTTCACTTAATTT  
CTTCTGCAGTCTTAGGCTTTGGCGGTATTTATCATGCACTTCTCGACCTGAGACTCTTGAAGAATCCTTTCCATTCTTC  
GGTTATGTATGAAAGATAGAAAATAAATGACTACAATTTTAGGTATTCACTTAATTTTGTAGGTATAGGTGCTTTTCT  
TCTAGTACTCAAGGCTCTTTATTTTGGTGGTGTATACGATACTTGGGCCCCAGGGGGA---GGAGATG---  
TAAGAAAAATTACCAACTTGACCCTTAGCCCAAGCGTTATATTTGGTTATTTACTAAAATCCCCTTTTGGGGGAGAAGGT  
TGGATTGTTAGTGTGGACGATTTAGAAGATATAATTGGGGGGCATGTATGGTTAGGTTCT---  
ATTTGTATACTTGGCGGAATTTGGCATATCTTAACCAAACCCTTTGCATGGGCTCGCCGTGCATTTGTATGGTCTGGAGA  
GGCTTACTTGTCTTATAGTTTLAGGTGCTTTATCTGTCTTTGGTTTTCATCGCTTGTGTGTTTTCGTCTGGTTAATAATACCG  
CCTATCCTAGTGAATTTTACGGACCCACCGGACCAGAAGCTTCTCAAGCTCAGGCATTTACTTTTCTAGTTAGAGACCAA  
CGTCTGGGGGCTAACGTGGGATCCGCCAAGGACCTACTGGGTTAGGTAAATATCTAATGCGGTCCCCGACCGGAGAGGT  
TATTTTGGAGGAGAACTATGCGTTTTTGGGATCTCCGTGCTCCTTGGTTGGAACCTCTAAGGGGTCCCAATGGTTTGG  
ACTTGGGTAGACTGAAAAAAGACATACAA---  
CCTTGGCAAGAACGACGTTCCGGCGGAATATATGACCCATGCTCCCTTAGGTTCTTTAAATTCGGTGGGTGGCGTTGCTAC  
TGAGATCAATGCAGTCAATTATGTCTCTCCTAGAAGTTGGTTGGCTACCTCTCATTTTGTCTAGGATTCTTCCCTATTTG  
TGGGACATTTGTGGCATGCGGGAAGGGCCCGTGCAGCTGCAGCAGGATTTGAAAAGGAATCGATCGTGATTTGGAACCT  
GTTCTTTCCATGACCCCTCTTAGC-----  
ATGACTATAGCCGCTGGTAGATTTACCAAAGAAGAA-----  
AATGATTTATTTGATATTATGGATGATTGGTTACGCAGAGACCGTTTTCGTTTTTGTGGGTTGGTCCGGTCTATTGCTCTT  
TCCTTGTGCTTATTTTCGTTTTAGGAGGTTGGTTACAGGTACAACCTTTGTAACCTCATGGTATACCCATGGATTGGCCA  
GTTCTATTTTGAAGGTTGTAATTTCTTAACCGCTGCAGTTTCTACTCCTGCGAATAGTTTACGCGATTCTTTGTTGCTA  
CTATGGGGTCTGAAGCACAAAGGAGATTTTACTCGTTGGTGTCAATTAGGCGGTCTGTGGACTTTTGTGCTCTCCATGG  
TGCTTTTCGACTAATAGGTTTTATGTTACGTCAATTTGAACTTGCTCGATCTGTTCAATTACGACCTTATAATGCAATCG  
CATTCTCTGCTCCAATTGCTGTTTTTGTCTGTATTCTGATTTATCCACTAGGTGAGTCTGGTTGGTTCTTTGCGCCC  
AGTTTTGGCGTAGCAGCTATATTTTCGATTCATCCTCTTCTTCCAAGGGTTTCATAATTGGACGTTGAACCCATTTTCATAT  
GATGGGGGTTGCTGGAGTATTAGGCGCTGCTTTGCTATGCGCTATTTCATGGTGTACCCGTAGAAAATACTTTGTTTCGAAG  
ATGGCGACGGTGCAAACACCTTCCGTGCTTTTAAACCAACTCAAGCTGAAGAGACTTATTCAATGGTACTGCTAACCGT  
TTTTGGTCCCAAATCTTTGGGGTTGCTTTTTCCAATAAACGTTGGTTACATTTCTTTATGTTATTTGTACCAGTAACCGG  
TTTATGGATGAGTGTCTTTGGGGTAGTTGGTCTGGCTCTGAACCTACGTGCCTATGATTTTCGTTTCCAAGAAATCCGTG  
CAGCAGAAGATCCGGAATTTGAGACTTTCTACACCAAAAATATTCTTAAATGAAGGTATTTCGTGCTTGGATGGCAGCT  
CAGGATCAGCCTCATGAAAACCTTATATCCCTGAGGAGGTTTACCCCGTGGAAACGCTCTT---

ATGTCTGGAAGCACGGGAGAACGTTCTTTTGCTGATATTATTACCAGTATTCGATACTGGGTCATTTCATAGCATTACTAT  
ACCTTCCCTATTTCATTGCGGGTTGGTTATTTCGTAAGTACAGGTTTAGCTTACGATGTGTTTGAAGTCCCTCGGCCAAACG  
AATATTTTACAGAGAGCCGACAGGGGATTCCACTAATAACTGGCCGTTTTGACTCTTTGGAACAACCTCGATGAATTTAGT  
AGATCCTTT---  
ATGACCATAGATCGAACCTATCCAATTTTTACAGTGCATGGTTGGCTGTTTCATGGACTAGCTGTACCTACTGTTTTTTT  
TTTGGGATCAATATCAGCAATGCAGTTCATCCAACGA-----  
ATGGCTACACAAACCGTAGAGGGTAGT---TCT---AGATCTGGG-----  
CCAAGACGAACCTATTATAGGGGATTTATTAACCGTTGAATTCGGAATATGGTAAAGTAGCTCCAGGCTGGGGTACTAC  
ACCTCTTATGGGGGTGGCAATAGCTTTATTTGCGGTATTCTATCTATTATTTTGGAAATTTATAATTCCTCCGTTTTAC  
TGGATGGAATTTTCAGTGAGT-----  
ATGCTTACTCTCAAACCTTCGTTTACACCGTGGTGATATTCTTTGTTTTCTCTTTCATCTTTCGGATTCTTATCTAATGA  
TCCGGGACGTAATCCTGGA---CGTGAGGAA-----  
ATGGCCGATACTACTGGAAGGATTCTCTTTGGCTAATAGGTAAGTACTGTAAGTGGCATTCTGTGATCGGTTCAATAGGTAT  
TTTCTTTTATGGTTTCATATTCCGGGGTGGGTTTCATCTCTG-----ATGCTT-----  
AATATCTTTAGTTAATGTGTATCTGTCTTAATTCTGTCTTT---  
TATTTCGAGTATGAGTGGTTTTTTCTTCGCCAAATTACCCGAGGCTTATGCCCTTTTCAATCCAATCGTAGACGTTATGCC  
CGTCATACCTGTACTCTTTTTTCTTCTTAGCCTTTGTTTGGCAAGCTGCTGTAAGTTTTAGA---ATGACACAATCA----  
--

AATCCGAATGAACAAAATGTTGAATTAATCGTACCAGTCTATACTGGGGTTTTATTACTTATTTTTGTACTTGTGTTTT  
ATTTTCCAATTATTTTTTCAAT---ATG---  
GAAGTAAATATTCTCGCATTATTGCTACTGCCTCTTTATTCTAGTTCCTACTGCTTTTTTACTTATCATCTACGTAAA  
AACAGTTAGTCAAAAAT-----GAT-----  
ATGGAAACAGCAACCCTAGTCACCATCTTCATATCTGGTTTACTTGTAAAGCTTTACTGGGTACGCTTTATATATCGCCTT  
TGGCCAA---CCTTCTCAACAATAAGAGATCCATTGCAAGAACACGGGGAC---  
ATGGAAGCATTGGTTTATACATTCTCTTAGTCTCGACGTTAGGGATAATTTTTTTTCGCTATCTTTTTTCGAGAACCACC  
TAAGGTTCCG-----ACTAAAAAATGAAA---  
ATGACTATTGCTTTCCAATTAGCTGTTTTTGCATTAATTGCGACTTCATCAATCTTACTGATTAGTGTACCCGTTGTATT  
TGCCTCTTCTGATGGTTGGTCAAGTAAAAAAAATGTTGTATTTTTCAGGTACATCATTATGGATTGATTAGTCTTTCTAG  
TAGCTATCTTAAATCTCTCATCTCT---  
ATGTCACCACAAACAGAGACTAAAGCAAGTGTGGATTCAAAGCTGGTGTAAAGATTATAAATTGACTTATTATACTCC  
TGACTACGAAACCAAAGATACTGATATCTTAGCGGCATTCCGAGTAAAGTCCCAACCTGGGGTTCCGCCCGAAGAAGCAG  
GAGCTGCAGTAGCCGCCGAATCGTCCACTGGTACATGGACAACCTGTGTGGACTGATGGACTTACCAGTCTTGATCGTTAC  
AAAGGACGATGCTACCACATCGAAAGCGTTGTTGGGGAGGAAAACCAATATATTGCTTATGTAGCTTATCCTTTAGACCT  
TTTTGAGGAAGGTTCTGTTACTAATATGTTTACTTCCATTGTAGGTAATGTATTTGGTTTCAAAGCCCTACGAGCCCTAC  
GTTTGGAGGATCTGCGAATTCCTACTTCTTATTCCAAAACCTTTCCAAGGCCACCAGCATGGCATCCAAGTTGAAAGAGAT  
AAGTTGAACAAGTATGGCCGTCCTTATTGGGATGCCTATTAACCAAAAATTTGGGGTTATCCGCAAAGAACTACGGCAG  
AGCCGTTTATGAATGTCTACGCGGTGGACTTGACTTTACCAAGGATGATGAAAATGTGAACCTACAACCATTTATGCGTT  
GGAGAGACCGTTTCTTATTTTTGTGCCGAAGCAATTTATAAAGCACAGGCCGAAACAGGCGAAATCAAG-----  
GGACATTACTTGAATGCTACTGCGGGTACATGTGAAGAAATGATCAAAGGGCTGTATTTGCAAGAGAATTGGGAGCTCC  
TATCGTAATGCATGACTACTTAAACAGGGGGCTTCACTGCAAATACTAGCTTGGCTCATTATTGTGCGGATAACGGCCTAC  
TTCTTACATCCATCGCGCAATGCATGCAGTTATTGATAGACAGAAAATCATGGTATGCATTTTC

Drimys

TCTAGGTTGGGGGGTAGGTCGGGGTGGGGAAGTTATAGACACTTTTCCATACTTTGTATCTGGAGTACTTCACTTAATTT  
CCTCTGCAGTCTTAGGCTTTGGTGGTATTTATCATGCCTTCTCGGACCTGAGACTCTTGAAGAATCCTTTCCATTCTTC  
GGTTATGTATGGAAAGATAGAAAATAAATGACCACAATTTGGGTATTCCTTAATCTTGTAGGTATAGGTGCTTTTCT  
TCTAGTACTCAAGCTCTTTATTTTTGGGGCGTATATGATACCTGGGCTCCCGGGGG---GGAGATG---  
TAAGAAAAATTACCAACTTGACCCTTAGCCCAAGTGTATATTTGGTTATTTACTAAAATCTCCCTTTGGTGGAGAAGGA  
TGGATTGTTAGTGTGGATGATTTAGAAGATAATAATTGGAGGACATATATGGTTAGGTTCC---  
ATTTGTATACTTGGTGAATCTGGCATACTTAACTAAACCCTTTGCATGGGCTCGCCGAGCATTGTCTGGTCTGGAGA  
GGCTTACTTGTCTTATAGTTTAGCTGCTTTATCTGTCTTTGGTTTCATCGCTTGTGTTTTCGCTGGTTCAATAATACCG  
CTTATCCTAGTGAGTTTTACGGGCCACTGGGCCAGAAGCTTCTCAAGCTCAAGCATTACTTTTCTAGTTAGAGACCAA  
CGTCTTGGGGCTAACGTAGGATCCGCTCAAGGACCTACTGGTTTGGTAAATATCTAATGCGTTCCCGACCGGAGAGGT  
CATTTTTGGAGGAGAACTATGCGTTTTTGGGATCTCCGCGCTCCCTGGTTGGAACCTCTAAGGGGTCCCAATGGTTTGG  
ACTTGAGTAGACTGAAAAAAGACATACAA---  
CCTTGGCAAGAACGACGTTCCGGCGGAATATATGACTCATGCTCCTTTAGGTTCTTTAAATCTGTGGGTGGCGTAGCTAC  
AGAGATCAATGCAGTCAATTATGTATCGCCTAGAAGTTGGTTAGCTACCTCTCATTTTGTTCTAGGATTCTTCCCTATTTCG  
TGGGTCATTTGTGGCATGCGGGAAGGGCCCGTGCAGCTGCAGCAGGATTTGAAAAGGAATTGATCGTGATTTTGAACCT

GTTCTTTCTATGACCCCTCTTAAC-----  
ATGACTATAGCCCTTGGTACATTTACTAAAGAAGAA-----  
AATGATTTATTTGATATTATGGATGACTGGTTACGTAGGGACCGTTTTCGTTTTGTAGGTTGGTCCGGTCTATTGCTCTT  
TCCTTGTGCTTATTTTGGCTTTAGGGGGTGGTTACAGGTACAACTTTTGTAACCTTCATGGTATACCCATGGATTGGCCA  
GTTCCATTTTGAAGGCTGCAATTTCTTAACCGCTGCAGTTTTCTACTCCTGCTAATAGTTTAGCACATTCTTTGTTGCTA  
TTATGGGGTCTGAAGCACAAGGAGATTTTACTCGTTGGTGTCAATTAGGTGGTCTGTGGACTTTTGTGCTCTCCATGG  
CGCTTTCGGACTAATAGGTTTCATGTTACGTCAATTCGAACCTTGCTCGATCGGTTCAATTGCGACCTTATAATGCAATCG  
CATTCTCTGGTCCAATTGCTGTTTTTGTCTGTATTCTGATTTATCCACTAGGTGAGTCTGGTTGGTTCTTTGCGCCC  
AGTTTTGGTGTAGCAGCTATATTTGATTTCATCCTATTCTTCCAAGGATTTTATAATTGGACGTTGAACCCATTTTCATAT  
GATGGGAGTTGCCGGAGTATTGGGTGCTGCTCTGCTATGCGCTATTTCATGGTGTACCCGTAGAAAATACGTTATTTCGAAG  
ATGTTGATGGTGAACAATACATTTCCGTGCTTTTAACCCAACCTCAAGCTGAAGAGACGTATTCGATGGTCACTGTAACCGC  
TTTTGGTCCCAAATCTTTGGGGTTGCTTTTTCCAATAAACGTTGGTTACATTTCTTTATGTTATTGTACCAGTAACCGG  
TTTTATGGATGAGTCTATTGGAGTAGTTGGTCTGGCTCTGAATCTACGTGCCTATGACTTCGTTTTCCAGGAAATCCGTG  
CAGCGGAAGATCCTGAATTTGAGACTTTCTACACCAAAAATATTCTCTTAAACGAAGGTATTTCGTGCTTGGATGGCGCT  
CAGGATCAGCCTCATGAAAACCTTATATTCCCTGAGGAGGTTTACCCCGTGGAAACGCTCTT---  
ATGTCTGGAAGCACGGGAGAACGTTCTTTTGGCTGATATTATCACCAGTATTCGATACTGGGTCAATTCATAGTATTACTAT  
ACCTTCCCTATTTCATTGCGGGTGGTTATTTCGTGAGCAGGGTTTTAGCTTATGATGTGTTTTGGAAGCCCTCGGCCAAACG  
AGTATTTACAGAGAGCCGACAGGGGATTCCATTAATAACTGGCCGTTTTGATCCTTTAGAACAACCTCGATGAATTTAGT  
AGATCCTTT---  
ATGACCATAGATCGAACCTATCCCATTTTTACAGTGCCTGGTTGGCCGTTTACGGACTGGCTGTACCTACCGTTTTCTTT  
TTTGGGGTCAATATCAGCAATGCAGTTCATCCAACGA-----  
ATGGCTACACAAACCGTTGAGGGTAGT---TCC---AGATCTAGG-----  
CCAAGACGAACCTACGACAGGGAATTTATTGAAACCATTGAATTCGGAATATGGTAAAGTAGCCCTGGATGGGGAACTAC  
TCCTTTGATGGGTGTGCAATGGCTCTGTTTGCATATTCTATCTATTATTTGGAGATTTATAATTCTTCCGTTTTAC  
TGGATGGAATTTCAATGAGT-----  
ATGCTTACTCTCAAACCTCTCGTTTTACACAGTAGTGATATTCTTTGTTTTCTCTCTTCATCTTCCGATTCCCTATCTAATGA  
TCCAGGACGTAATCCTGGA---CGTGAGGAA-----  
ATGGCCGATCACTACTGGAAGGATTCCTCTTTGGCTGATAGTACTGTAACCTGGTATTCTGTGATTGGTTCAATAGGTAT  
TTTTCTTTACTGTTTCACTCCGATTGGGCTCATCCCTA-----ATGCTT-----  
AATATCTTTAGTTTATCTGTATCTGTCTTAATTCTGCCCTT---CATTG-----  
AGTAGCTTTTTCTTCGCCAAATTGCCGAGGCTTATGCTTTTTTCAATCCAATCGTAGATTTTATGCCAGTCATACCTGT  
GCTCTTTTTCTCTTAGCCCTTGTGGCAAGCTGCTGTAAGTTTTCGA---ACGACACAATCA-----  
AACCCGAACGAACAAATGTTGAATTGAATCGTACCAGCCTCTACTGGGGTTTTATTACTCATTTTTGTACTTGCTGTTTT  
ATTTTCCAATTATTTCTTCAAT---ATG---  
GAAGTCAATATTCTCGCATTATTGCTACTGCGCTGTTTCATTCTAGTTTCTACTGCTTTTTTACTTATCATCTACGTAAA  
AACAGTCAGTCAAAAT-----GAT-----  
ATGGAACAGCAACCCTAGTCGCCATCTCCATATCTGGTTCATTGTAAGCTTTACTGGGTACGCCTTATATACCGCTTT  
TGGGCAA---CCCTCTCAACAACCTAAGAGATCCATTTCGAGGAACACGGGGAC---  
ATGGAAGCATTGGTTTATACGTTCTGTTAGTCTCGACTCTAGGGATAATTTTTTTTCGTATCTTTTTTCGAGAACCACC  
TAAGGTTCCG-----ACAAAAGGATGAAA---  
ATGACTATTGCTTTTTCAATTGGCTCTTTTTGCAATTAATTGCTACTTCATCAATCTTACTGATTAGTGTACCTATTGTATT  
TGCTTCTTCCGATGGTTGGTCAAGTAACAAAATGTTGTATTTCCGGTACATCATTATGGATTGGATTAGTCTTTCTGG  
TAGCTATCCTTAATTCTCTCATCTCT---  
ATGTCACAAAAACAGAGACTAAAGCAAGTGTGGATTCAAAGCGGGTGTAAAGATTACAAATTGACTTATTATACTCC  
TGACTATGAAACCAAAGATACTGATATCTTGGCAGCATTCCGAGTAACTCCTCAACCCGGAGTTCACCCGGAGGAAGCGG  
GAGCTGCTGTAGCTGCCGAATCTTCTACTGGTACATGGACAACCTGTGTGGACCGATGGACTTACCAGCCTTGATCGTTAC  
AAAGGACGATGCTACCACATCGAGCCTGTTGCTGGGGAGGAAGATCAATATATTGCTTATGTAGCTTACCTTTTAGACCT  
TTTTGAAGAAGGTTCTGTTACTAACATGTTTACTTCCATTGTGGGTAATGTATTTGGGTTCAAAGCCCTACGAGCTCTAC  
GTCTAGAGGATCTGCAATTCCTACTGCATATGTCAAAACTTTCCAAGGCCACCCCATGGCATCCAAGTTGAGAGAGAT  
AAATTGAACAAGTATGGTGCCTCCCTATTGGGATGTAATTAACCAAAAATGGGGTTATCCGCCAAGAACTACGGTAG  
AGCGGTTTATGAATGTCTCCGCGGTGGACTTGATTTTACCAAGGATGATGAGAACGTGAACTCCCAACCATTTATGCGTT  
GGAGAGACCGTTTTCTTATTTTGTGCCGAGGCTCTTTATAAAGCACAGGCCGAAACAGGTGAAATCAA-----  
GGACATTACTTGAATGCTACTGCGGGTACATGTGAAGAAATGATGAAAAGGGCAGTATTTGCCAGAGAATTGGGAGTTCC  
CATCGTAATGCATGACTACTTAACAGGGGGATTCACTGCAAATACTACCTTGGCTCATTATTGCCGAGACAACGGTCTAC  
TTCTTACATCCATCGCGCAATGCATGCAGTTATTGATAGACAGAAAATCATGGTATACACTTTC  
Eucalyptus  
TCTAGGTTGGGGGTAGGTCGGGGTGGGGAAGTTATAGACACCTTTCATATTTTGTATCTGGAGTACTTCACTTAATTT

CGTCTGCAGTATTAGGCTTTGGCGGTATTTATCATGCACTTCTGGGCCCTGAGACTCTTGAAGAATCTTTTCCATTCTTT  
GGTTATGTATGGAAAGATAGAAATAAAATGACCACAATTTTGGGTATTCACTTAATCTTGTTAGGTATAGGTGCTTTTCT  
TCTAGTATTCAAGGCTCTTTATTTTGGAGGCGTATATGATACCTGGGCTCCGGGAGGG---GGAGATG---  
TAAGAAAAATTACCAACTTGACCCTTAGCCCAAGTGTATATTTGGTTATTTACTAAAATCTCCTTTTGGAGGAGAAGGA  
TGGATTGTTAGTGTGGACGATTTGGAAGATATAAATGGAGGGCATGTATGGTTAGGTTCC---  
ATTTGTATACTTGGCGGAATCTGGCATATCTTAACCAAACCTTTTGCATGGGCTCGTTCGAGCACTTGTATGGTCTGGGGA  
GGCTTACTTGTCTTATAGTTTGTCTTATCTGTTTTGGTTTCATTGCTTGTGCTTTGTCTGGTTCAATAATACCG  
CTTATCCTAGTGAATTTACGGACCTACTGGGCCAGAAGCTTCTCAAGCTCAGGCATTTACTTTTCTAGTTAGAGACCAA  
CGTCTTGGGGCTAACGTGGGATCCGCTCAAGGACCTACTGGTTTAGGTAAATACCTAATGCGTTCCCCGACTGGAGAAGT  
AATTTTGGAGGGGAAACTATGCGTTTTGGGATCTGCGTCTCTTGGTTAGAACCTCTAAGGGGTCCAAATGGATTGG  
ACTTGAGTAGGCTGAAAAAGATACAG---  
CCTTGGCAAGAACGTCGTTCCGCGAATATATGACTCATGCTCCTTTAGGTTCTTTAAATTCTGTGGGTGGTGTGCTAC  
CGAGATCAATGCAGTCAATTATGTCTCTCCTAGAAAGTTGGTTAGCTACTTCTCATTTTGTCTAGGATTCTTTCTATTCTG  
TAGGTCATTTATGGCACGCGGGAAGGGCTCGTGCAGCTGCAGCAGGATTTGAAAAGGGAATTGATCGTGATTTTGAACCT  
GTTCTTTCCATGACCCCCCTTAAT-----  
ATGACTATAGCCCTTGGTAAATTTACCAAAGACGAA-----  
AATGATTTATTTGATATTATGGATGACTGGTTACGTAGAGACCGTTTTCGTTTTTGTAGGTTGGTCCGGTCTATTACTCTT  
TCCTTGTGCCTATTTTCGCTTAGGTGGTTGGTTCACAGGTACAACCTTTGTAACCTTCATGGTATACCCATGGATTGGCCA  
GTTCTTATTTGGAAGGATGCAACTTCTTAACCGCCGAGTTTCTACTCCCGCTAATAGTTTAGCACATTCTTTGTTGTTA  
CTATGGGGTCTGAAGCACAAGGAGATTTTACTCGTTGGTGTCAATTAGGCGGTCTGTGGACTTTTGTGGCTCTCCACGG  
CGTTTTCGGACTAATAGGTTTTCATGTTACGTCAATTTGAACTTGTCTGCATCTGTTCAATTGCGACCTTATAATGCAATCG  
CATTCTCTGGTCCAATTGCTGTTTTTGTCTGTTTCTGATTTATCCACTAGGTCAGTCTGGTTGGTTCTTTGCGCCT  
AGTTTTGGTGTAGCAGCTATATTTTCGCTTCATCCTTTTTTTTCCAAGGGTTTCATAATTGGACATTGAACCCATTTTCATAT  
GATGGGAGTTGCCGGTGTATTGGGCGCTGCTCTCCTATGCGCTATTCATGGTGTCTACCGTAGAAAATACTTTATTTGAAAG  
ATGGTGATGGTGCAAATACATTCCGTGCTTTTAAACCAAACCTCAAGCTGAAGAACTTATTCAATGGTCACCGCTAATCGC  
TTTTGGTCCCAAATCTTTGGGGTTGCTTTTTTCCAATAAACGTTGGTTACATTTCTTTATGTTATTTGTACCAGTAACCGG  
TTTATGGATGAGTGTCTTGGAGTAGTCGGTCTGGCTCTGAACCTACGTGCCTATGACTTCGTTTTCCAGGAGATCCGTG  
CAGCGGAAGATCTGAATTTGAAACTTTCTACACCAAAAAATTTCTCTTAAACGAAGGATTTCTGCTTGGATGGCGGCT  
CAAGTACAGCCTCATGAAAACCTTATATTTCCCTGAGGAGGTTCTACCCCGTGGAAACGCTCTT---  
ATGTCTGGAAGCACAGGAGAAGCTTTCTTTGCTGATATTATTACCAGTATTCGATACTGGGTTATTTCATAGTATTACTAT  
ACCTTCCCTATTTCATTGCGGGTTGGTTATTTCGTGAGCAGCGGTTTAGCTTATGATGTGTTTGGAAAGCCCTCGTCCAAACG  
AATATTTTACAGAGAGCCGACAAGGAATTCATTAATAACTGGCCGTTTTGACCCTTTGGAACAACCTCGATGAATTTAGT  
AGATCTTTT---  
ATGACCATAGATCGAACCTATCCAATTTTTACAGTGCAGTGGTTAGCTGTTTCATGGACTAGCTGTACCTACCGTTTTCTTT  
TTTAGGGTCAATATCAGCAATGCAGTTCATCCAACGA-----  
ATGGCTACGCAAACCGTTGAGGGTAGT---TCT---AGATCTGGA-----  
CCAAGACGAACCTATTGTAGGGGATTTATTGAAACCATTGAATTCAGAATATGGTAAAGTAGCTCCTGGATGGGGAACTAC  
TCCTTTGATGGGTGTGCAATGGCTCTATTTGCAGTATTCCTATCTATTATTTTGGAAATTTATAATTCTTCTGTTTTAC  
TGGACGGAATTTCAATGAAT-----  
ATGCTTACTCTCAAACCTTTGTTTATACAGTAGTGATATTTTTTGTCTCTCTTTCATCTTTGGATTCCCTATCTAATGA  
TCCAGGACGTAATCCTGGA---CGTGAAGAA-----  
ATGGCCGATACTACTGGAAGGATTCCTCTTTGGATAATAGGTACTGTAACCTGGTATTCTTGTGATTGGTTTAAATAGGTAT  
TTTCTTTTATGGTTTCATACTCCGGGTTGGGTTTCATCTCTG-----ATGCTT-----  
AATATCTTTAGTTTGTATCTGTCTTTCATTCCACCCTT---TATTCA-----  
AGTAGTTTTTTCTTAGCCAAATTCGCTGAGGCCTACGCTTTTTTGAATCCAATCGTAGATTTTATGCCAGTAATACCCCT  
TCTCTTTTTTCTCTTAGCCTTTGTTTGGCAAGCTGTGTAAGTTTTTTCGA---ACGACACAATCA-----  
AATCCGAACGAACAAAATGTTGAATTTGAATCGTACCAGTCTCTACTGGGGGTTATTACTCATTTTTGTACTTGTGTTTT  
ATTTTCCAATTTTCTTCAAT---ATG---  
GAAGTAAATATTCTCGCATTTATTGCTACTGCACCTTTCATTCTAGTTTCTACTGCTTTTTTTACTTATAATATACGTAAA  
AACAGTCAGTCAAAGT-----GAT-----  
ATGGAAACAGCAACCCTAGTCGCCATCTCTATATCTGGTTTACTTGTAAAGTTTTACTGGGTACGCCTTATATACTGCTTT  
TGGGCAA---CCCTCTCAACAATTAAGAGATCCATTTCGAAGAACACGGGGAC---  
ATGGAAGCATTGGTTTATACATTCCTCTTAGTCTCGACTCTAGGGATAATTTTTTTTTCGCTATCTTTTTTTCGAGAACCACC  
TAAAGTTCCA-----ACTAAAAAGGTGAAA---  
ATGACTATTGCTTTCCAATTGGCTGTTTTTGCATTAATTGCTACTTCATTAATCTTACTGATTAGTGTACCCGTTGTATT  
TGCTTCTCCTGACGGTTGGTGCAGTAACAAAATGTTGTATTTTCTGGTACATCATTATGGATTGGATTAGTCTTTCTGG  
TGGGTATCCTTAATTTCTCTCATCTCT---

ATGTCACCACAAACAGAGACTAAAGCAAGTGTGGATTCAAAGCTGGTGTAAAGATTATAAACTGACTTATTATACTCC  
TGACTATGAAACCAAAGATACTGATATCTTGGCAGCATTCCGAGTAACTCCTCAACCTGGAGTTCCTCCTGAGGAAGCAG  
GGGCTGCGGTAGCTGCTGAATCTTCTACTGGTACATGGACAACCTGTGTGGACCGATGGGCTTACCAGCCTTGATCGTTAT  
AAAGGAAGATGCTACCACATCGAGCCTGTTGCTGGAGACGAAAATCAATATATATGTTATGTAGCTTACCCTTTAGACCT  
TTTTGAAGAAGGTTCTGTTACTAATATGTTTACTTCCATTGTGGGTAATGTATTTGGGTTCAAAGCCCTGCGCGCTCTAC  
GTCTGGAGGATCTGCGAATCCCTCCTTCTTATACGAAAACCTTTCCAAGGCCCGCTCATGGCATCCAAGTTGAGAGAGAT  
AAATTGAACAAATATGGGCGTCCCCTATTGGGATGTACTATTAACCCGAAATTGGGGTTATCCGCTAAGAACTACGGTAG  
AGCAGTTTATGAATGTCTTCGTGGTGGACTTGATTTTACGAAAGATGATGAGAACGTGAACTCACAACCATTTATGCGTT  
GGAGAGACCGTTTCTTATTTTGTGCCGAAGCCATTTTTAAATCACAGGCTGAAACAGGTGAAATCAAA-----  
GGGCATTACTTGAATGCTACTGCAGGTACATGCGAAGAAATGATGAAAAGGGCTGTATTTGCCAGAGAATTGGGAGTTCC  
TATCGTAATGCATGACTACTTAACAGGGGGATTCACTGCAAATACTAGCTTGGCTCATTATTGCCGAGATAATGGTCTAC  
TTCTTCACATCCATCGTGCAATGCATGCAGTTATTGATAGACAGAAAAATCATGGTATACACTTTA

Ginkgo

TCTAGGATGGGGAGTAGGTCCTGGTGGGGAAATCGTGGACACTTTTCCATACTTTGTATCTGGGGTACTCCACTTAATTT  
CCTCTGCAGTTTTAGGTTTTGGTGGTATTTATCACGCACTTATAGGACCCGAAACTTTGGAGGAATCCTTTCGATTTTTT  
GGTTATGTATGGAAAGATAGGAACAAAATGACCACAATTTTGGGTATTCACCTAATCCTGCTAGGTGTTGGTGGCTTTTCT  
CCTAGTGCTCAAGGCTTTGTATTTTGGAGGTGTATATGATACCTGGGCCCTGGTGGT---GGAGATG---  
TAAGAAGAATTACGAACCTGACTCTTGACCCAAGTGTCTATTTGGTTATTTGCTTAAGTCCCCCTTTGGTGGAGAGGGA  
TGGATTGTTAGTGTGGACAATCTAGAAGATATAATCGGAGGACATGTATGGTTAGGTTCC---  
ATTTGTATCTTCGGCGGTATCTGGCACATCTTAACCAAACCTTTTGCATGGGCTCGTCTGCGTGTGTTGTATGGTCCGGAGA  
AGCTTACTTGTCTATAGTTTGGAGCCCTAGCTGTGTTGGTTTTATTGCTTGTGTTTTGTCTGGTTCAACAATACAG  
CTTATCCCAGTGAATTCTATGGGCNTACCGGCCCAGAAGCCTCTCAAGCTCAAGCGTTTACTTTTCTAGTTAGAGACCAA  
CGTCTCGGAGCTAATGTGGGGTCTGCCCAAGGACCTACCGGTTTAGGTAAATACCTTATGCGTTCTCCTACCGGAGAAAT  
TATCTTCGGAGGAGAAACAATGCGTTTTTGGGATCTTCGTGCTCCCTGGTTGGAACCTCTAAGGGGTCTAATGGTTTGG  
ACCTGAGTAAGTTGAAAAAAGACATACG---  
CCCTGGCAAGAACGACGTTTCGGCGGAATATATGACTCATGCTCCTTTAGGTTCTTTGAATTCGGTGGGTGGTGTAGCTAC  
TGAGATCAATGCGGTAAT-----  
-----  
-----

ATGACTATAGCCCTTGAAAGTCTTCCAAAAAGAA-----  
AAACAATTATTTGATATTATGGATGACTGGCTGCGGAGAGACCGTTTTCGTTTTTGTAGGTTGGTCCGGTCTATTGCTCTT  
TCCTTGTGCCTATTTTCGCCCTAGGTGGATGGTTCACGGGTACAACCTTTGCAACTTCGTGGTATACCCATGGATTGGCCA  
GTTCTTATTTGGAGGGCTGTAATTTCTTAACTGCCGCAGTTTCTACTCCTGCTAATAGTTTAGCGCATTCTTTGTTGTTA  
TTATGGGGTCCCGAAGCACAAGGAGATTTTACTCGTTGGTGCCAATTAGGTGGTCTATGGACCTTCGTTGCTCTTCATGG  
TGCTTTTTGGTCTAATAGGCTTCATGTTACGACAATTTGAACTTGCTCGATCTGTACAATTGCGACCTTATAATGCAATTG  
CATTCTCTGCTCCAATTGCTGTTTTTGTCTGTATTCTTGATCTATCCATTAGGCCAGTCTGGCTGGTTCTTCGCACCT  
AGTTTTGGTGTAGCAGCTATCTTCCGATTTATCCTCTTTTTTCAAGGTTTTTATAATTGGACCTTGAACCCATTTTCATAT  
GATGGGAGTTGCCGGAGTATTGGGTGCTGCTTTTTATGTGCTATTTCATGGTGTACTGTGGAAAATACTTTATTTCGAAG  
ATGGTGATGGTGCAAATACGTTCCGTGCTTTTAAACCAAACCTCAATCTGAAGAGACTTATTCCATGGTCACTGCTAACCGT  
TTCTGGTCCCAAATTTTTGGGGTTGCTTTTTCCAATAAACGTTGGTTACATTTCTTTATGTTATTTGTGCCAGTGACCGG  
TTTTGGGATGAGTGCCATTGGAGTAGTTGGCCTAGCTCTAAACCTACGTGCATATGACTTTGTTTTCCAAGAGATCCGTG  
CAGCAGAAGATCCCGAATTTGAGACTTTCTACACCAAAAATATTCTTGAACGAAGGTATTTCGTGCTTGGATGGCGGCT  
CAGGATCAGCCTCATGAAAACCTTATATTCCCGGAGGAGTTTACCCCGTGGAAACGCTCTT---  
ATGTCTGGGAATACGGGAGAACGCTCCTTTGCTGACATTATTACCAGTATTCGATACTGGGTTATCCATAGCATTACTAT  
ACCTTCCCTATTCATTGCAGGTTGGTTATTTGTGAGCAGGTTTGGCTTATGATGTGTTCCGGGAGCCCTCGGCCGAACG  
AGTATTTACAGATAGCCGACAGGAGGTTCCATTAATAACTGGCCGTTTTCGATCCGTTAGAACAACCTCGACGAATTTACT  
AGATCTTTT---  
ATGACTATAGATAGAACCTATCCAATTTTTACAGTTAGATGGTTGGCCGTTTACGGACTAGCTGTACCTACAGTTTCTTT  
CTTGGGATCAATATCAGCAATGCAGTTCATCCAACGA-----  
ATGGCTACACAGACCATTGATGATACT---TCC---GGATCCGGG-----  
CCAAGACGAACTGTTATAGGAAATTTATTAACCCTTAAATTCAGAATATGGTAAAGTAGCTCCTGGATGGGGAACTAC  
TCCTTTTTATGGGTGTTGCAATGGCTCTATTTGCAGTATTCTTATCTATTATCCCGGAGATTTATAATTCTTCCGTTTTAT  
TAGATGGAATTCCTGAGTTGGGTC-----  
ATGCTTACTCTTAAAGCTGTTTCGTTTACACAGTAGTGATATTTTTCGTTTTTCTTCTTATCTTCGGATTCTATCAAACGA  
TCCTGGACGTAATCCTGGA---CGTAAAGAA-----  
ATGGCCGATACCACTGGAAGGATCCCTCTTTGGCTGATAAGTACTGTAACCTGGTACTCTTGTGATTGGTTTTAATGGGTAT  
CTTTTTCTACGGTTCATATTCTGGATTAGGGTCATCCCTA-----ATGCC-----AATATTTGT-----

-----CTAGATAATGTATTT---TATTTG-----  
AGTGATCCCTTCTTGGCTAAATTACCCGAGGCGTATGCTATTTCCGATCCAATTGTAGATGTAATGCCAATTATCCCCGT  
ATTTTTTCTTCTTTTAGCCTTTGTTTGGCAAGCTGCTATAAGTTTTCGA---ATGACACAATCA-----  
AACCCGAACGAACAGAATGTTGAATTGAATCGTACCAGCCTCTACTGGGGGTTGTTACTCATTTTTTGTACTTGCCGTTTT  
ATTCTCTAATTACTCTTTCAAT---ATG---  
GAAGTAAATATCCTTGCATTTATTGCTATTGCCTGTTTCAATTTTCAGTTTCTACTGCTTTTTCTACTTATCATTACGTAAA  
AACGGTTGGTGAAAGC-----AAT-----  
ATGGAACTGCAACCTTAGTCGCCATCTCCATATCTCGTTCACTTGTGAGCTTTACTGGTTACGCTCTGTATAACCGCCTT  
TGGACAA---CCCTCCGAACAACCTTAGGGATCCTTTTCGAGGAACACGAAGAC---  
ATGGAAGCATTGGTTTTATACATTCCTGTTGGTATCGACCTTAGGGATAATATTTTTCGCTATTTTTCTCCGAGACCCACC  
TAAAGTTCCG-----AATGAAGGGAGGAAA---  
ATGACTATTGCTTTCCAATCGGCTGTGTTTGCATTAATTGCTATTTTCAATTTCTCTGGTATTGGTGTACCTGTCTGCTACT  
TGCCTCTCTGATGGTTGGTCAAGTAGCAAAAATGTTGTATTTTTCGGGTGCATCATTATGGATCGGATCAGTTCTTTTGG  
TAGGTATCCTTAATTCTTTAATCTCT---  
ATGTCACCAAAAACAGAGACTAAAGCAAGTGTGGGATTTAAAGCTGGTGTAAAGATTACAGATTGACTTATTATACTCC  
TGAATATCAAACCAAAGATACTGATATCTTGGCAGCATTCCGAGTAACTCCTCAACCTGGAGTGCCACCTGAGGAAGCGG  
GAGCTGCAGTAGCTGCCGAATCTTCCACTGGTACATGGACCACTGTTTGGACCGATGGACTTACCAGTCTTGATCGTTAC  
AAGGGAAGATGCTATGACATCGAGCCCCTTCTGGGGAGGAAAATCAATTTATTGCCTATGTAGCTTACCCTTTGGATCT  
TTTTCGAGGAAGGTTCTGTTACTAACCTGTTCACTTCCATTGTAGGGAATGTATTTGGATTCAAAGCCCTACGAGCTCTAC  
GTCTGGAAGATCTGCGAATTCCTCTGCTTATTCCAAAACCTTTCCAGGGTCCACCTCATGGTATCCAAGTTGAAAGGGAT  
AAATTGAATAAATATGGCCGTCCCCTATTGGGATGTACTATCAAGCCAAAATTTGGGTTTATCTGCCAAAATTTATGGTAG  
AGCAGTTTACGAATGTCTTCGTGGTGGACTTGATTTTACTAAAGATGATGAGAACGTAAATTTCCCAACCATTTCATGCGCT  
GGAGAGATCGTTTTCTGTTTTGTGCAGAAGCAATTTATAAAGCTCAGACCGAGACGGGTGAAATTAAG-----  
GGACATTACTTGAATGCTACTGCAGGTACATGCGAAGAAATGATGAAAAGGGCAGTATTTGCCAGAGAATTTGGGAGTTCC  
TATCGTCATGCATGACTATCTGACGGGAGGTTTTACTGCAAATACTAGCTTGGCTCATTATTGCCGAGACAATGGCCTAC  
TTCTTACATTACCCGCGCAATGCATGCAGTTATTGACAGACAAAAGAAATCATGGTATGCATTTCC  
Glycine  
CTAGGTTGGGGGTAGGTCCTGGGGGGGAAGTTATAGACACCTTTCCATACTTTGTGTCTGGAGTACTTCACTTAATTT  
CCTCTGCAGTATTGGGCTTTGGCGGTATTTATCATGCACTTTTGGGACCTGAGACTCTTGAAGAATCTTTTTCCATTCTTC  
GGTTATGTATGGAAGATAGAAAATAAATGACTACAATTTTGGGTATTCACTTAATCTTGTAGGTATAGGTGCGTTTTCT  
TCTAGTATTCAAGGCTCTTTATTTTTGGAGGTATATATGATACGTGGGCTCCGGGGGGC---GGAGATG---  
TAAGAAAAATAACCAATTTGACCCTTAGTCCAAGTATTATATTTGGATATTTATTAATAATCACCTTTTGGGGGAGAAGGG  
TGGATTGTTAGTGTGGACGATTTGGAAGATATAATTGGGGGGCATGTATGGTTGGGTTCC---  
ATTTGTATACTTGGTGGAACTCTGGCATACTTAAACCAAACCTTTTGCATGGGCTCGGCGTGCACCTTGTATGGTCTGGAGA  
AGCTTACTTATCTTATAGTTTLAGGTGCTTTATCTGTTTTTGGTTTTTATTGCTTGTGTCTTTGTCTGGTTAATAATACCG  
CTTATCCTAGTGAGTTTTACGGGCCCACTGGGCCAGAAGCTTCTCAAGCTCAAGCATTACTTTTTCTAGTTAGAGACCAA  
CGTCTTGGGGCTAATGTAGGATCTGCTCAAGGACCTACAGGTTTAGGTAAATATCTAATGCGTTCCCCGACAGGAGAAGT  
TATTTTTGGGGGAGAACTATGCGTTTTTGGGATTTGCGTGCTCCTTGGTTAGAACCTTAAGGGGTCCGAATGGTTTAG  
ACTTGAGTAGACTGAAAAAAGATATACAG---  
CCTTGGCAAGAACGCCGTTCTGCGGAATATATGACTCATGCTCCTTTAGGTTTCTTAAATTTCCGTGGGTGGCGTAGCTAC  
AGAGATTAATGCAGTCAATTATGTTTTCTCCTAGAAGTTGGTTAGCTACTTCTCATTTTGTTCTAGGATTCTTCCCTATTTG  
TAGGCCATTTATGGCACGCGGGAAGAGCTCGCGCAGCTGCCGCAGGATTTGAAAAGGAATTGATCGAGATTTTGAACCA  
GTTCTTTCCATGACTCCTCTTAAT-----  
ATGACTATAGCTCTTGGTAAATTTACCAAAGATGAA-----  
AATGATTTATTTGATATTATGGATGACTGGTTGCGGAGGGACCGTTTTCGTTTTTGTAGGTTGGTCCGGTCTATTACTCTT  
CCCTTGCGCCTATTTTCGCTTGGGGGTTGGTTACAGGTACGACCTTTGTAACCTTCATGGTATACTCATGGATTGGCAA  
GTTCTTATTTTGAAGGCTGCAACTTCTAACCCTGTCAGTCTCCACTCCTGCTAATAGTTTACACACTCTTTGTTGTTA  
CTGTGGGGTCTGAAGCACAGGGAGATTTTACCCTGGTGTCAATTAGGTGGTCTGTGGACTTTTGTGCTCTCCACGG  
CGCTTTTCGATTAATAGGTTTTCATGTTACGTCAATTTGAACTTGCTCGATCTGTTCAATTGCGGCCTTATAATGCAATCG  
CATTCTCTGGTCCAATTGCTGTTTTTGTCTGTATTCTTATTTATCCACTGGGTCAGTCTGGTTGGTTCTTTGCTCCT  
AGTTTTGGTGTAGCAGCTATATTTTCGATTCATCCTCTTTTTTCCAAGGGTTTATAATTGGACATTAACCCATTTTCATAT  
GATGGGAGTTGCTGGTGTATTGGGCGCGGCACTACTATGCGCTATTTCATGGTGCCACCGTAGAAAATACTTTATTTGAAG  
ATGGTGTAGGCGCAAATACATTCCGTGCTTTTTAACCCAAACCAAGCTGAAGAACTTATTCAATGGTTACTGCTAATCGC  
TTTTGGTCCCAAATCTTTGGGGTTGCTTTTTTCCAATAAACGTTGGTTACATTTCTTTATGTTATTTGTACCAGTAACTGG  
TTTATGGATGAGTGTCTTTGGGGTAGTCGGTTTTGGCCCTGAACCTACGTGCCTATGACTTCGTTTTCTCAAGAAATCCGCG  
CAGCGGAAGATCCTGAATTTGAGACTTTCTACACCAAAAATATTCTCTTAAACGAAGGTATTTCGTGCGTGGATGGCGGCT  
CAAGATCAGCCTCATGAAAACCTTATATCCCTGAGGAGGTTTACCACGTGGAACGCTCTT---



ATGTCTGGAAGCACAGGAGAACGTTCTTTTGCTGATATTATTACCAGTATCCGATACTGGATTATTCATAGCATTACTAT  
ACCCTCCCTATTTCATTGCAGGTTGGTTATTTGTGACGACGGGTCTAGCTTACGATGTTTTTGGAAAGCCCCGCCCAAACG  
AATATTTTACAGAGAGCCGACAAGGAATTCATTAATAACTGGCCGTTTTGATCCTTTGGAACAACCTTGATGAATTTAGT  
AGATCTTTT---  
ATGACCATAGATAGGACCTATCCAATTTTTACAGTACGATGGTTGGCTGTTTACGGACTAGCGGTACCCACTGTTTCTTT  
TTTGGGATCAATATCAGCAATGCAGTTCATCCAACGA-----  
ATGGCTACGCAAACCGTTGAGGATAAT---TCT---AGATCTGGT-----  
CCAAGACGAACCTGTTGTAGGGGATTTATTGAAACCATTAAATTCAGAATATGGTAAAGTAGCTCCGGGGTGGGGAACCTAC  
TCCTTTGATGGGTGTTGCAATGGCTCTATTTGCGATATTTCTATCTATTATTTTGGAGATTTATAATTCGTCCATTTTAC  
TCGACGGAATTTCTATGAAT-----  
ATGCTTACTCTAAAACCTATTTGTTTACACGGTAGTGATATTCTTCGTTTTCTTTTTTTCATCTTCGGATTCTATCTAACGA  
TCCAGGACGTAATCCAGGG---CGTGAAGAA-----  
ATGGCCGATACTACTGGAAGGATTCTCTTTGGATAATAGGTAAGTACTGTAAGTGGTATTACTGTGATCGGTTTTAATTGGTAT  
TTTTTTTTATGGTTCATATTTCCGGATTGGGCTCATCTCTG-----ATGCTT-----  
AATATCTTTAATTTGGTCTGTATTTGTATTCACTCCGTCCTT---TATTCA-----  
AGTAGTTTTTTCTCGGCGAAATTGCCCGAAGCCTACGCTTTCTTGAATCCAATTGTGGATATTATGCCAGTAATACCCTT  
ACTTTTTTTCTTTTAGCTTTTGTGGCAAGCTGCTGTAAGTTTTTTCGA---ACGACACAATCA-----  
AACCCAAATGAACAAAATGTTGAATTGAATCGTACCAGTCTCTACTGGGGGTTATTACTCATTTTTGTACTTGCTGTTTT  
ATTTTCAAATATTTCTTCAAT---ATG---  
GAAGTAAATATTCTTGCATTTATTGCTACTGCCTGTTTATTCTAGTTCCTACTGCTTTTTTACTTATAATTTACGTAAA  
AACGGTAAGTCAAAGT-----GAC-----  
ATGGAAACAGCAACCCTAATTGCCATCTCTATATCTGGTTTACTTGTAAAGTTTTACTGGGTATGCCTTATATATTGCCTT  
TGGGCAA---CCCTCGCAACAACCTAAGAGATCCATTTGAAGAACATGGGGAC---  
ATGGAAAGCATTGGTTTATACATTCCTCTTAGTCTCGACTTTAGGAATTATTTTTTTTTCGCTATCTTTTTTAGAGAACCCCC  
TAAAGTTCGG-----ACGAAAAAAGGT-----  
ATGACTATTGCTTTCCAATTAGCTGTTTTTGCATTAATTGCTATTTTCAATTTATTTTATTGATTAGTGTACCTGTTGTATT  
TGCTTCTCCTGAAGGTTGGTGAATAACAAAAATGTTGTATTTCCGGTACATCATTATGGATTGGATTAGTGTCTCTCG  
TGGGTATCTTAATTTCTCTCATTCT---  
ATGTCAACCAAAACAGACTAAAGCAAGTGTGGGTTCAAAGCTGGTGTAAAGATTATAAATTGACTTATTATACTCC  
TGACTATGAAACCAAAGACTGATATCTTGGCAGCATTCCGAGTAACTCCTCAACCAGGAGTTCCGCCTGAAGAAGCAG  
GTGCCCGGTAGCCGCCGAATCTTCTACTGGTACATGGACAACCTGTGTGGACCGATGGGCTTACCAGTCTTGATCGTTAC  
AAAGGGCGATGCTACGGCCTTGAACCTGTTGCTGGGGAAGAAAATCAATATATTGCTTATGTAGCTTATCCCTTAGACCT  
TTTTGAAGAAGGTTCTGTTACTAACATGTTTACTTCCATTGTGCGTAATGTATTTGGGTTCAAAGGCCCTGCGTGCTCTAC  
GTCTGGAGGATTTGCGAATCCCTACTGCTTATATTAATAACTTTCCAAGGTCCGCCTCATGGCATCCAAGTTGAGAGAGAT  
AAATTGAACAAGTATGGTCTGCCCTATTAGGATGTACTATTAACCTAAATTTGGGGTTATCCGCTAAGAATTATGGTAG  
AGCTGTTTATGAATGTCTTCGTGGGGGACTTGATTTTACCAAAGATGATGAAAATGTGAATTTCCAACCATTTATGCGTT  
GGAGAGACCGTTTCTTATTTTGTGCCGAAGCCATTTTTAAATCACAGGCTGAAACAGGTGAAATCAA-----  
GGGCATTACTTGAATGCAACTGCGGGTACATGCGAAGAAATGATGAAAAGAGCTGTATTTGCCAGAGAATTAGGCGTTCC  
TATCGTAATGCATGATTATTTAACGGGGGATTCACTGCAAATACTAGCTTGGCTCATTATTGCCGAGATAATGGTCTAC  
TTCTTCATATACACCGTGCAATGCATGCAGTTATCGACAGACAAAAGAATCATGGTATGCACCTTC

Gossypium

TCTAGGCTGGGGGGTAGGTCCTGGCGGAGAAGTTATAGACACCTTTCCATACTTTGTATCTGGAGTACTTCACTTAATTT  
CCTCTGCTGTATTGGGCTTTGGCGGTATTTATCATGCACTTCTGGGACCTGAAACTCTTGAAGAATCTTTTCCATTTTTC  
GGTTATGTATGGAAAGATAGAAATAAAATGACCACAATTTTGGGTATTCCTTAATTTTGTAGGTATAGGTGCTTTTTCT  
TCTAGTATTCAGGCTCTTTATTTTGGGGGCGTATACGATACCTGGGCTCCGGGAGGG---GGAGATG---  
TAAGAAAAATTACCAACTTGACTCTTAGCCCAAGTGTATATTTGGTTATTTACTAAAATCGCCCTTTGGAGGCGAAGGG  
TGGATTGTTAGTGTGGACGATTTGGAAGATATAATTTGGAGGACATGTATGGTTAGGTTCC---  
ATTTGTATATTTGGTGAATCTGGCATACTTAACCAAACCTTTTGCATGGGCTCGCCGTGCCTTGTATGGTTCGGGAGA  
GGCTTACTTGTCTTATAGTTTGGTGTCTTTATCCGTTTTTGGTTTTTATTGCTTGTGCTTTGTCTGGTTCAATAATACCG  
CTTATCCTAGTGAGTTTTACGGGCCACTGGACCAGAAGCTTCTCAAGCTCAAGCATTACTTTTCTAGTTAGAGACCAA  
CGTCTTGGGGCTAACGTGGGATCCGCTCAAGGGCCTACTGGGTTAGGTAAATATCTAATGCGTTCCCCGACCGGAGAAGT  
CATTTTTGGAGGGGAAACTATGCGTTTTTGGGATCTGCGTGCTCCTTGGTTAGAACCTCTAAGAGGTCCCAATGGTTTTG  
ACTTGAGTAGGTTGAAAAAAGACATACAA---  
CCTTGGCAAGAACGGCGTTCTGCGGAATATATGACGCATGCTCCTTTAGGGTCTTTAAATTTCTGTAGGTGGCGTAGCTAC  
CGAGATCAATGCAGTTAATTATGTCTCTCCGAGAAGTTGGTTAGCTACCTCTCATTTTGTTCTAGGATTCTTCCCTATTTCG  
TGGGTCAATTTATGGCACGCGGGAAGAGCTCGCGCAGCCGAGCGGGATTTGAAAAAGGAATTGATCGTGATTTTGGAGCT  
GTTCTCTCCATGACTCCTCTTAAC-----

ATGACTATAGCCCTTGGTAAATTTACCAAAGATGAA-----  
AATGATTTATTTGATATTATGGATGACTGGTTACGTAGGGACCCTTTTCGTTTTTGTAGGTTGGTCCGGCCTATTGCTCTT  
TCCTTGTGCCTATTTTCGCTCTAGGGGGTTGGTTTACAGGTACAACCTTTGTAACCTTCGTGGTATACTCATGGATTGGCCA  
GCTCCTATTTGGAAGGCTGCAATTTCTTAACCGCCGCAGTTTCTACCCCTGCTAATAGTTTACGACATTCTTTGTTGTTA  
CTATGGGGTCTGAAGCACAAGGAGATTTTACTCGTTGGTGTCAATTAGGTGGTCTGTGGACATTTGTTGCTCTCCACGG  
CGCTTTCGGACTAATAGGTTTTATGTTACGTCAATTTGAACTTGC GCGATCTGTTCAATTGCGACCTTATAACGCAATCG  
CATTCTCTGGTCCAATTGCTGTTTTTGTCTGTATTCTGATTTATCCACTAGGTACGTCTGGTTGGTTCTTTGCGCCT  
AGTTTTGGTGTAGCAGCTATATTTTCGATTCATCCTCTTTTTCCAAGGATTTATAATTGGACATTGAACCCATTTTCATAT  
GATGGGAGTTGCCGGTGTATTGGGCGCGGCTCTGCTATGCGCTATTCATGGTGTCTACCGTAGAGAATACTTTATTTGAAG  
ATGGTGTAGGTGCAAATACATCTCCGTGCTTTTAAACCAACTCAAGCCGAAGAACTTATTCAATGGTCACCGCTAACC GC  
TTTTGGTCCCAAATCTTTGGGGTTGCTTTTTCCAATAAACCTTGGTTACATTTCTTTATGTTATTTGTACCAGTAACCGG  
TTTATGGATGAGTGTCTTTGGAGTAGTCGGTCTGACTGAACTACGTGCCTATGACTTCGTTTTCCAGGAAATCCGTG  
CAGCAGAAGATCCTGAATTTGAGACTTTCTACACCAAAAATATTCTTTTAAACGAAGGTATTTCGTGCTTGGATGGCGGCT  
CAAGATCAGCCTCATGAAAACCTTATATTCCTGAGGAGGTTCTACCCCGTGGAAACGCTCTT---  
ATGTCTGGAAGCACAGGAGAACGTTCTTTTGGTGTATATTATTACCAGTATTCGATACTGGGTCATTTCATAGTATTACTAT  
ACCTTCCCTATTCATCGCGGGTTGGTTATTTCGTGAGCACAGGTTTAGCTTATGATGTGTTTGGAAAGCCCTCGTCCAAACG  
AGTATTTTACAGAGAGCCGACAAGGAATTCATTAATAACTGGCCGTTTTGATTCTTTGGAACAACCTCGATGAATTTAGT  
AGATCTTTT---  
ATGACCATAGATCGAACCTATCCAATTTTTACAGTGCATGGTTGGCTGTTACGGACTAGCTGTACCTACCGTTTTCTTT  
TTTGGGGTCAATATCAGCAATGCAGTTCATCCAACGA-----  
ATGGCTACACAAACCGTTGAGGGTAGT---TCT---AGATCTGGT-----  
CCAAGACGAAGTGTAGGGGATTTTTTGAACCATTGAATTCGGAATATGGTAAGGTAGCCCTGGATGGGGAAACGCAC  
TCCTTTGATGGGTGTCGCAATGGCTTTATTTGCGATATTCTTATCTATTATTTTGGAGATTTATAATTTCTTCCGTTTTAC  
TGGATGGAATTTCA-----  
GGGAGATTGTGTAATGCTTACTCTTAAACTCTTTGTTTACACCGTAGTAATATTCTTTGTTTCTCTCTTTCATCTTCGGATT  
CCTATCTAATGATCCGGGACGTAATCCTGGA---CGCGAAGAA-----  
ATGGCCGATACTACTGGAAGGATTCCTCTTTGGATAATAGGTACGGTAACCTGGTATTCTGTGATCGGTTTAAATAGGTAT  
TTTTCTTTTATGGTTTATATTCTGGATTGGGTTTCGTCCCTG-----ATGCTT-----  
AATATCTTTTATTTGATCTGTATCTGTTTTTAAATTTCTGCCCTT---TTTTCG-----  
AGTAGTTTTTTTATTCGCAAATTTGCCGAGGCTATGCTTTTTTGAATCCAATCGTAGATTTTTATGCCAGTAATACCTGT  
TCTTTTTTTTCTTTAGCCTTTGTTTGGCAAGCTGCTGTAAGTTTTTCGA---ATGACACAATCA-----  
AACCCGAACGAACAAAATGTTGAATTGAATCGTACCAGTCTCTACTGGGGGTTATTACTCATTTTTGTACTTGCTGTTTT  
ATTTTCCAATTATTTCTTCAAT---ATG---  
GAAGTAAATATTCTCGCATTATTGCTACAGCGCTGTTTATTCTAGTTTCTACCGCTTTTTTACTTATAATATACGTAAA  
AACTGTCAGTCAAAGT-----GAT-----  
ATGGAAACAGCAACCTTAGTCGCCATCTCTATATCTGGTTTACTTGTAAAGTTTTACTGGGTACGCCTTATATACTGCTTT  
TGGGCAA---CCCTCTCAACAATTAAGAGATCCATTTCGAGGAACACGGGGAC---  
ATGGAAGCATTGGTTTATACATTCCTCTTAGTATCTACTCTAGGGATAATTTTTTTTCGCTATCTTTTTTTCGAGAACC GCC  
TAAAATTCTA-----ACTAAAAAATGAAA---  
ATGACTATTGCTTTCCAATTGGCTGTTTTTGCATTAATTGCTACTTTCGTCATCTTACTGATTAGTGTACCTGTTGTATT  
TGCTTCTCCTGATGGTTGGTTGAGTAACAAAATATTGTATTTTCCGGTACATCTTTATGGATTGGATTAGTTTTTCTAG  
TGGGTATCCTTAATTCTCTTATTTCT---  
ATGTCACCACAAACAGAGACTAAAGCAAGTGTGGATTCAAAGCTGGTGTAAAGAGTATAAATTGACTTATTATACTCC  
TGAATATGAAGTCAAAGATACTGATATCTTGGCAGCCTTCCGAGTAACTCCTCAACCCGGAGTTCGCGCTGAGGAAGCAG  
GGGCCGCGGTAGCTGCTGAATCTTCTACTGGTACATGGACAACCGTGTGGACCGATGGGCTTACCAGCCTTGATCGTTAC  
AAAGGGCGATGCTACGACATTGAGCCCCTTCTGGAGAAGAAGATCAATATATATGTTATGTAGCTTACCCTTTAGACCT  
TTTTGAAGAAGGTTCTGTTACTAACATGTTTACTTCCATTGTGGGTAATGTATTTGGGTTCAAAGCCCTGCGCGCTCTAC  
TCTTAGAGGATCTGCGAGTCCCTACTGCTTATATTAAAAATTTCCAAGGCCCGCTCATGGCATCCAGGTTGAAAGAGAT  
AAATTGAACAAGTATGGTCGCCCCCTATTAGGATGTAATAAACCATAAATGGGGTTATCCGCTAAGAAGTACGGTAG  
AGCAGTTTATGAATGTCTACGTGGCGGGCTTGATTTTACCAAAGATGATGAAAATGTGAACTCCCAACCATTTATGCGCT  
GGAGAGACCGTTTTCTTATTTTGTGCCGAAGCAATTTTTAAATCACAGGCTGAAACAGGTGAAATCAAA-----  
GGGCATTACTTGAATGCTACTGCAGGTACATGTGAAGAAATGATCAAAAGGGCCATGTGTGCTAGAGAATTGGGAGTTCC  
TATCGTAATGCACGACTACTTAAACAGGTGGGTTACCAGCAATACTAGCTTGGCTCATTATTGCCGAGATAATGGTCTAC  
TTCTTACATCCATCGCGCAATGCACGCAGTTATTGATAGACAGAAGAATCATGGTATGCACCTTC  
Helianthus  
TCTAGGTTGGGGGGTAGGTCCTGGTGGGGAAGTTATAGATACTTTTCCATACTTTGTATCTGGAGTACTTCATTTAATTT  
CCTCTGCAGTATTGGGCTTTGGCGGTATTTATCATGCACTTTTAGGACCTGAGACGCTTGAAGAATCTTTTCCATTCTTC

GGTTATGTATGGAAAGATAGAAATAAAATGACCACAATTTTAGGTATTCATTTAATCTTGTTAGGTCTAGGTGCTTTTCT  
TCTAGTATTCAAGGCTCTTTATTTTGGGGCGTATATGATACTTGGGCTCCGGGAGGA---GGAGATG---  
TAAGAAAAATCACCAACTTGACGCTTAGCCCAAGTATCATATTTGGTTATTTACTAAAATCGCCCTTTGGGGGGGAAGGA  
TGGATTGTTAGTGTAGACGATTTGGAAGATATAATAGGAGGCCATGTGTGGTTAGGTTCC---  
ATTTGTATACTTGGTGGAAATTTGGCATATCTTAACCAAACCCCTTCGCATGGGCTCGACGTGCACCTTGATGGTCTGGAGA  
GGCTTACTTATCTTATAGTTTLAGCGGCTATATCTGTCTTTGGTTTCATTGCTTGTGTTTTGTCTGGTTCAATAATACGG  
CTTATCCTAGTGAGTTTTATGGACCCACTGGACCAGAAGCTTCTCAAGCTCAAGCATTACTTTTTCTAGTTAGAGACCAA  
CGTCTTGGAGCTAACGTAGGATCCGCTCAAGGGCCTACCGGTTTAGGTAAATATTTAATGCGTTCCCCGACCGGAGAAGT  
CATTTTTGGAGGAGAAACTATGCGTTTTTGGGATTTGCGCGCTCCTTGGTTAGAACCTCTAAGGGGTCCAAATGGGTTGG  
ACTTGAGTCCGGCTGAAAAAAGACATACAA---  
CCTTGGCAAGAACGTCGTTCCGCAGAATATAGCTCATGCTCCTTTAGGTTCTTTAAATTCGGTGGGTGGAGTAGCTAC  
CGAGATCAATGCAGTCAATTTATGTGTCTCCTAGAAGTTGGTTAGCTACTTCTCATTTTTGTTCTAGGATTCTTCTTCTCG  
TAGGACATTTGTGGCACGCAGGAAGAGCTCGTGCAGCTGCAGCAGGATTTGAAAAAGGAATTGATCGTGATTTTGAACCT  
GTTCTTTCCATGACCCTCTTAATTGA-----  
ATGACTATAGCCCTTGGTAAATTTACCAAAGACGAA-----  
AATGATTTGTTTATGATATTATGGATGACTGGTTACGTAGGGACCGTTTTCGTTTTTGTAGGCTGGTCCGGCCTATTGCTCTT  
TCCTTGTGCCTATTTCCCGTAGGGGTTGGTTACGGGTACAACCTTTGTAACCTTCATGGTATACCCATGGATTGGCCA  
GTTCTTATTTGGAAGGCTGCAATTTCTTAACCTGCCGCAGTTTCTACTCCTGCTAATAGTTTLAGCACATTCTTTGTTATTA  
CTATGGGGTCTGAAGCACAAGGAGATTTACTCGTTGGTGTCAATTAGGCGGTCTGTGGACTTTTGTGCTCTCCACGG  
CGTTTTCGGACTAATAGTTTTATGTTACGTCAATTCGAACCTGCTCGATCTGTTCAATTGCGACCTTATAATGCAATCG  
CATTCTCTGGTCCAATTGCCGTTTTTGTCTGTATTCTGATTTATCCACTAGGTGAGTCTGGTTGGTTCTTTGCGCCT  
AGTTTTGGTGTAGCAGCTATATTTGATTTATCCTCTTTTTTCAAGGATTTATAACTGGACATTGAACCCATTTTCATAT  
GATGGGAGTTGCCGGTGTATTGGGCGCTGCTTTGCTATGCGCTATTCATGGTGTACCCGTAGAAAATACTTTATTTGAAG  
ATGGTGATGGCGCAAATACATTCCGTGCTTTTTAACCCAACTCAAGCTGAAGAACTTATTCAATGGTCACTGCTAATCGC  
TTTTGGTCCCAAATCTTTGGGGTTGCTTTTTCCAATAAACGTTGGTTACATTTCTTTATGTTATTTGTACCAGTAACTGG  
TTTATGGATGAGTGTCTTGGAGTAGTCGGTCTGGCCTTGAACCTACGTGCCTATGACTTCGTTTTCTCAAGAAATTCGCG  
CGGCGGAAGATCCTGAATTTGAGACTTTCTACACCAAAAAATATTCTCTTAAACGAAGGTATTCGTGCTTGGATGGCGGT  
CAAGATCAGCCTCATGAAAACCTTATATCCCTGAGGAGTTCTACCCCGTGGAAACGCTCTTTAAATGTCTGGAAGCAC  
AGGAGAACGTTCTTTTGTCTGATATTTACCAGTATTCGCTACTGGGTCATTATAGCATTACTATACCTTCCCTATTCA  
TTGCGGGTTGGTTATTCGTGAGCAGCTTTAGCTTACGATGTGTTTGAAGCCCTCGGCCAAACGAGTATTTACAGAG  
AACCGACAAGGAATTCATTAATCACCGGCCGTTTTGATTCTTTGGAACAACCTCGATGAATTTAGTAGATCTTTTTAGAT  
GACCATAGATCGAACCTATCCAATTTTTACAGTGCAGTGGTTGGCTGTTACGGCCTAGCTGTACCTACCGTTTTCTTTT  
TGGGGTCAATATCAGCAATGCAGTTCATACAACGATA-----  
ATGGCTACACAACTGTGAGAACGGT---TCT---AAATCTGGT-----  
CCAAGACGAACACTGTAGGGAATTTATTAACCCCTTGAATTCGAATATGGTAAAGTAGCTCCGGGGTGGGGAACGAC  
CCCTTTGATGGGCGTCGCAATGGCTCTATTTGCGGTATTTCTATCTATTATTTTAGAGATTTATAATTTCTTCTGTTTTAT  
TGGATGGAATTTCAATGAATTAG-----  
ATGCTTACTCTCAAACCTTTTCGTTTACACAGTAGTAATATTTCTTTGTTTCTCTCTTTCATCTTTGGATTCCCTATCCAATGA  
TCCAGGACGTAATCCTGGA---CGTGAAGAATAA---  
ATGGCCGATACTACTGGAAGAATTCCTCTTTGGATAATAGGTACTGTAGCTGGTATTCTTGTGATCGGTTTAGTAGGCGT  
TTTCTTTTATGGTTTCATATCCGGATTGGGTTTCATCCCTGTAG-----ATGCTT-----  
AATATCTTTAGTTTGTATCTGT-----CTTAATTCTGCCCTT---TATCCG-----  
AGTAGTCTTTTCTTCGCCAAATTGCCCGAAGCCTATGCTTTTTTGAATCCAATCGTAGATGTTATGCCAGTCATACCCCT  
GTTCTTTTTTCTTTTAGCCTTTGTTTGGCAAGCTGCTGTAAGTTTTCGATAAACGACACAATCA-----  
AACCCAAACGAACAAAATGTTGAATGAATCGTACCAGCCTCTACTGGGGGTTATTACTCATTTTTGTACTTGCCGTTTT  
ATTTTCCAATATTTCTTCAATTAATG---  
GAAGTAAATATTTGCATTTATTGCTACTGCAGTGTTCATTTTAGTTTCTACTGCTTTTCTACTTATAATTTACGTAAA  
AACAGTCAGTCAAAAT-----GATTAA-----  
ATGGAAACAGCAACCCTAGTCGCCATCTTTATATCTGGTTTACTTGTAAAGTTTTACTGGGTACGCCTTGTATACCGCTTT  
TGGGCAA---  
CCTTCTCAACAACTAAGAGATCCATTTCGAGGAACACGGGGACTAAATGGAAGCATTGGTTTATAACATTCTTATTAGTCTC  
GACTCTAGGGATAATTTTTTTCGCTATCTTTTTTAGAGAACCGCCGACAATTTCA-----ACTAAAAA---TAA-  
--  
ATGACTCTTGCTTTCCAATTTGGCTGTTTTTGCATTAATTGCTACTTTCATCAATCTTATTGATTGGCGTACCCGTTGTATT  
TGCTTCTCCTGATGGTTGGTCAAGTAACAAAAATGTTGTATTTTTCAGGTACATCATTATGGATTGGATTAGTCTTTCTGG  
TGGGTATCCTTAATTTCTCTCATCTCTTGAATGTCACCACAAACAGAGACTAAAGCAAGTGTGGATTCAAAGCTGGTGT  
AAAGATTATAAATTGACTTATTATACTCCTGAATATGAAACCAAGGATACTGATATCTTGGCAGCATTTCGAGTAACTCC

TCAACCTGGAGTTCCGCCTGAAGAAGCAGGGGCCGAGTAGCTGCCGAATCTTCTACTGGTACATGGACAACCTGTATGGA  
CCGATGGACTTACCAGCCTTGACCGTTACAAAGGCCGATGCTATGGACTTGAGCCTGTTCTGGAGAAGACAATCAATTT  
ATTGCTTATGTAGCGTACCCATTAGACCTTTTTGAAGAAGGTTCTGTTACTAACATGTTTACTTCCATTGTAGGTAATGT  
ATTTGGGTTCAAAGCCCTGCGTGCTCTACGTCTGGAAGATTTGCGAATCCCAGACTGCGTATGTTAAAACCTTTCGACGGTC  
CGCCTCACGGTATCCAAGTTGAAAGAGATAAATTGAACAAGTATGGTCGTCCTGTTGGGATGTACTATTAACCGAAA  
TTGGGGTTATCCGCTAAAACCTACGGTAGAGCTTGTATGAATGTCTTCGTGGTGGCCTTGATTTTACTAAAGATGATGA  
GAACGTGAACTCCCAACCATTATGCGTTGGAGAGACCGTTTCTTATTTTGTGCCGAAGCTATTTATAAAGCACAAGCTG  
AAACAGGTGAAATCAAA-----

GGGCATTACTTGAATGCTACTGCGGGTAATTGCGAAGATATGATGAAAAGGGCTGTATTTGCTAGAGAATTGGGAGTTCC  
TATCGTAATGCATGACTACCTAACAGGTGGATTCACTGCAAATACTAGCTTGTCTCAGTATTGCCGAGATAATGGTCTAC  
TTCTTCACATCCACCGCGCAATGCATGCGGTTATTGATAGACAGAAGAATCATGGTATGCACTTCC

Illicium

TCTAGGTTGGGGGTAGGTTCCGGGTGGGGAAGTTATAGACACCTTTCCGTACTTTGTATCTGGAGTACTTCACTTAATTT  
CCTCTGCAGTCTTAGGCTTTGGCGGTATTTATCATGCACTTCTCGGGCCTGAGACTCTTGAAGAATCCTTTCCATTCTTC  
GGTTATGTATGGAAAGATAGAAATAAATGACCACAATTTTGGGTATTCACTTAATCTTGTAGGTATAGGTGCTTTTCT  
CCTAGTGCTCAAGGCTCTTTATTTTGGAGGCGTATATGATACCTGGGCTCCTGGGGGG---GGAGATG---

TAAGAAGAATTACTAACTTGACCCTTAGCCCAAGTGTTATATTTGGTTATTTACTAAAATCCCCCTTTGGGGGAGAAGGC  
TGGATTGTTAGTGTGGACGATTTAGAAGATATAATTGGAGGACATGTATGGGTAGGTGCC---  
ATTTGTATACTTGGTGGAACTGGCATACTTAACCAAACCCTTGCATGGGCTCGCCGCGCACTTGTATGGTCTGGAGA  
AGCTTACTTGTCTTATAGTTTGGGGCTTTATCTGTCTTTGGTTTCATCGCTTGTGTTTCGTCTGGTTCAATAATACCG  
CATATCCCAGTGAGTTTTACGGACCCACTGGGCCAGAAGCTTCTCAAGCTCAAGCATTACTTTTCTAGTTAGAGACCAA  
CGCCTTGGGGCTAACGTGGGATCCGCTCAAGGGCCTACTGGTTTAGGTAAATATCTAATGCGTTCCCCGACGGGAGAGGT  
CATTTTGGAGGAGAACTATGCGTTTTTGGGATCTCCGTGCTCCCTGGTTGGAGCCTCTAAGGGGTCCCAATGGTTTGG  
ACTTGAGTAGGCTGAAAAAAGACATACAA---

CCTTGGCAAGAACGACGTTCCGGCGGAATATATGACTCATGCTCCTTTAGGTTCTTTAAATTCGGTGGGTGGCGTAGCTAC  
TGAGATCAATGCAGTCAATTATGTCTCTCCTAGAAGTTGGTTAGCTACCTCTCATTTTGTTCTAGGATTCTTCTTATTTCG  
TGGGTCACTTGTGGCACGCGGGAAGGGCCCGTGCAGCTGCAGCAGGATTTGAAAAGGAATCGATCGTGATTTTGAACCT  
GTTCTTTCCATGACCCCTCTTAAC-----

ATGACTATAGCCCTTGGTAGATTTACCAAAGAAGAA-----

AATGATTTATTTGATATTATGGATGACTGGTTACGCAGGGACCGTTTTCGTTTTTGTAGGTTGGTCCGGTCTATTGCTCTT  
TCCTTGTGCTTATTTTGGTTTTAGGAGGTTGGTTACAGGTACAACCTTTGTAACCTCATGGTATACCCATGGATTGGCCA  
GTTCTTATTTGGAAGGCTGCAATTTCTTAACCGCTGCAGTTTCTACTCCTGCTAATAGTTTAGCACATTCTTTGTTGCTA  
CTATGGGGCCCCGAAGCACAAGGAGATTTACTCGTTGGTGTCAATTAGGCGGTCTGTGGACTTTTGTGCTCTCCATGG  
CGCTTTCGGACTAATAGGTTTTCATGTTACGTCAATTGCAACTTGCTCGATCTGTTCAATTGCGACCTTATAATGCAATTG  
CATTCTCTGCCCAATTGCTGTTTTTGTTCCTGATTTATCCACTAGGTGAGTCTGGTTGGTTCTTTGCACCC  
AGTTTTGGTGTAGCAGCTATATTTTCGATTCATCCTCTTCTTCCAAGGGTTTCATAACTGGACGTTGAACCCATTTTCATAT  
GATGGGAGTTGCCGGAGTATTAGGAGCTGCTCTGCTATGCGCTATTTCATGGTGTACGGTAGAAAATACTTTATTTCGAAG  
ATGGTGATGGTGCAAATACATTTCCGTGCTTTTAAACCAACTCAAGCTGAAGAGACTTATTTCGATGGTCACTGCTAACC  
TTTTGGTCCCAAATCTTTGGGGTTGCTTTTTCCAATAAACGTTGGTTACATTTCTTTATGTTATTTGTACCAGTAACCGG  
TTTATGGATGAGTCTTGGAGTAGTCGGCCTGGCTCTGAACCTACGTGCCTACGATTTTCGTTTCCAGGAAATACGTG  
CAGCGGAAGACCCTGAATTTGAGACTTTCTACACCAAAAATATTCTTAAACGAAGGCATTTCGTGCTTGGATGGCGGCT  
CAGGATCAGCCTCATGAAAACCTTATATTCCTGAGGAGGTTTACCCCGTGGAAACGCTCTT---

ATGTCTGGAAGCACAGGAGAACGTTCTTTGCTGATATTATTACCAGTATTCGATACTGGGTCACTCATAGTATTACTAT  
ACCTTCCCTATTTCATTGCAGGTTGGTTATTTCGTGAGCAGGGTTTAGCTTACGATGTGTTTGGAAAGCCCTCGGCCAAACG  
AGTATTTACGGAGAACCACAGGGGATTCATTAATAACTGGCCGTTTTCGATCCTTTGGAACAACCTTGATGAATTTAGT  
AGATCCTTT---

ATGACCATAGATAGAACCTATCCAATTTTTACAGTGAGATGGTTGGCTGTTACGGACTAGCGGTACCTACCGTGTTTTT  
TTTGGGGTCAATATCAGCAATGCAGTTCATACAACGA-----

ATGGCTACACAAACCATTGAGGGTAGT---TCCAGCAGATCTGGG-----

CCAAGACGAACAATTGTAGGGGATTTATTAACCATTGAATTCAGAATATGGTAAAGTAGCTCCTGGATGGGGAACTAC  
TCCCTTTATGGGTGTGCAATGGCTCTATTTGCGATATTCTATCTATTATTTGGAGATTTATAATTCTTCCGTTTTAC  
TGGATGGAATTTAGTAAGT-----

ATGCTTACTCTCAAACCTCTTCGTTTACACAGTAGTGATATTCTTTGTTTCTCTCTTCATCTTCGGATTCCCTATCTAATGA  
CCCAGGACGTAATCCTGGA---

CGTGAAGAAGAAGAAATGGCCGATACTACTGGAAGGATTCTCTCTGGCTGATAGGTACTGTAACCTGGTATTCTGTGAT  
CGGTTCAATGGGCATTTTCTTCTACGGCTCATATTCTGGGTTGGGCTCATCCCTG-----ATGCCT-----  
--AATATCTTTAGTTAATCTGTATCTGTCTTAATTATGCCCTT---CATTG-----

AGTAGTTTTTCTTCGCCAAATTGCCCGAGGCTTATGCTTTTTTTAATCCAATCGTAGATGTTATGCCAGTCATACCTGT  
GCTCTTTTTTCTCTTAGCCCTTGTGGCAAGCTGCTGTAAGTTTTTCGA---ACGACACAATCA-----  
AACCCGAACGAACAAAATGTTGAATTGAATCGTACCAGTCTCTACTGGGGTTTATTACTCATTTTTGTACTTGGCTGTTTT  
ATTTTCCAATTATTTCTTCAAT---ATG---  
GAAGTAAATATCCTCGCATTATTGCTACTGCCTGTTTCTAGTTTCTACTGCTTTTTTACTTATCATTACGTAAA  
AACAGTCAGTCAAAAT-----GAT-----  
ATGGAACAGCAACCCTAGTCGCCATCTCCATATCTGGTTCACTTGTAAAGCTTTACTGGGTACGCCTTATATACCGCTTT  
TGGGCAA---CCCTCTCAACAATAAGAGATCCATTGAAGAACACGGGGAC---  
ATGGAAGCATTGGTTTATACATTCTGTTAGTCTCGACTCTAGGGATAATTTTTTTTCGCCATCTTTTTTCGAGAACCGCC  
TAAGGTTCCG-----AATAAAAAGATGAAA---  
ATGATTATTGCTTTCCAATTGGCTGTTTTTGCATTAATTGCTACTTTCATCAATCTTACTGATTAGTGTACCTGTTGTATT  
TGCTTCTTCTGATGGTTGGTCAAATAACAAAATGTTGTATTTCCGGTACGTCATTATGGATTGGATTAGTGTCTGG  
TAGCTATCCTTAATTCTCTCATCTCT---  
ATGTCACCAAAAACAGAGACTAAAGCAAGTGTGGATTCAAGGCTGGTGTAAAGATTACAGATTGACTTATTATACTCC  
TGAATATGAAACGAAAGAGACTGATATCTTGGCAGCATTCCGAGTAACTCCTCAACCCGGAGTTCCACCTGAGGAAGCGG  
GAGCTGCGGTAGCTGCGGAATCCTCTACTGGTACCTGGACCCTGTGTGGACTGATGGACTTACCAGCCTCGATCGTTAC  
AAAGGGCGATGCTACCACATTGAGCCCCTGCTGGGGAGGAAAATCAATATATTGCTTATGTAGCTTATCCTTTAGACCT  
TTTTGAAGAAGGTTCTGTTACTAACATGTTTACTTCCATTGTGGGTAATGTATTTGGGTTCAAAGCCCTACGAGCTCTGC  
GTCTGGAAGATTTGCGAATTCCTCTGCTTATTCCAAAACCTTCCAAGGCCACCTCATGGCATCCAAGTTGAGAGAGAT  
AAATTGAACAAGTATGGTCGCTCTATTGGGATGTACTATTAACCAAAAATTAGGATTATCTGCCAAGAACTACGGTAG  
AGCGGTTTTATGAATGCCTCCGCGGTGGACTTGATTTTACCAAGGATGATGAGAACGTGAACCTCCAACCATTTATGCGTT  
GGAGGGACCGTTTTCGTATTTTGTGCCGAAGCTATTTATAAAGCGCAGGCCGAAACAGGTGAAATTTAAA-----  
GGACATTACTTGAATGCTACTGCAGGTACATGCGAAGAAATGATCAAAAGGGCTGTATTTGCCAGAGAATTGGGAGTTCC  
TATCGTAATGCATGACTACTTAACAGGGGGATTCACTGCAAATACTAGCTTGGCTCATTATTGCCGAGACAACGGCTTAC  
TTCTTACATCCATCGCGCAATGCATGCAGTTATTGATAGACAGAGGAATCATGGTATGCACCTTC

Jasminum

TCTAGGTTGGGGGTAGGTCCTGGGGGAGAAGTTACAGACACCTTTCCATACTTTGTATCTGGAGTACTTCAATTAATTT  
CCTCTGCAGTATTAGGCTTTGGCGGTATTTATCATGCACTTCTAGGACCTGAGACACTTGAAGAATCTTTTCCATTCTTC  
GGTTATGTATGAAAGATAGAAAATAAATGACCACAATTTTAGGTATTCACTTAATCTTGTAGGTCTAGGTGCTTTTTCT  
TCTAGTATTCAAGGCTCTTTATTTTCGGGGCGTATATGATACTTGGGCTCCGGGAGGG---GGAGATG---  
TAAGAAAAATTACCAACTTGACCCTTAGCCCAAGTATTCTATTTGGTTATTTACTAAAATCGCCCTTTGGGGGGGAAGGA  
TGGATTGTTAGTGTGGACGATTTAGAAGATATAATCGGAGGACATGTATGGTTAGGTTCC---  
ATTTGTATACTTGGTGAATCTGGCATACTTAAACCAAACCCTTCGCATGGGCTCGACGTGCTCTTGTATGGTCTGGGGA  
GGCTTACTTATCTTATAGTTTGGGGCTTTATCCGCCTTTGGTTTTATTGCTTGTGTTTTGTCTGTTTTCAATAATACCG  
CTTATCCTAGCGAGTTTTACGGACCTACTGGTCCAGAAGCTTCTCAAGCTCAAGCATTACTTTTTCTAGTTAGAGACCAA  
CGTCTTGGGGCTAATGTAGGATCTGCTCAAGGACCTACTGGTTTAGGTAAATATCTAATGCGTTCCCCGACCGGAGAAGT  
CATTTTTGGAGGAGAACTATGCGTTTTTGGGATCTGCGTGCTCCTTGGTTAGAACCCTTAAGAGGTCCAAATGGATTGG  
ACTTGAGTAGGTTGAAAAAAGACATACAA---  
CCTTGGCAAGAACGGCGTTCCGCAGAATATATGACTCATGCCCTTTAGGTTCTTTAAATTTCTGTGGGTGGCGTAGCTAC  
CGAGATTAATGCAGTCAATTATGTCTCTCCTAGAAGTTGGTTAGCTACCTCTCATTGTTCTAGGATTCTTTTTCTTTG  
TAGGTCATTTGTGGCATGCGGGAAGGGCTCGTGCAGCTGCAGCAGGATTTGAAAAAGGAATTGATCGTGATTTTGAACCT  
GTTCTTTCCATGACCCCTCTTAATTGA-----  
ATGACTATAGCCCTTGGTAAATTTACCAAAGACGAA-----  
AAGGATTTATTTGATATTATGGATGACTGGTTACGGAGGGACCGTTTTCGTTTTTGTAGGCTGGTCCGGTCTATTGCTCTT  
TCCTTGTGCCTATTTTCGCTGTAGGGGTTGGTTTACAGGTACAACCTTTGTAACCTCATGGTATACCCATGGATTGGCCA  
GTTCTATTTGGAAGGCTGTAATTTCTTAACGGCCGCAGTTCTACTCTGCTAATAGTTTACGCGATTCTTTATTGTTA  
CTGTGGGGCTCTGAAGCACAAGGAGATTTTACTCGTTGGTGTCAATTAGGCGGTCTGTGGACTTTTGTGCTCTCCATGG  
CGCTTTTCGACTAATAGGTTTTCATGTTACGTCAATTCGAGCTTGTCTGATCTGTTCAATTGCGACCTTATAATGCAATCG  
CATTCTCTGGTCCAATTGCTGTTTTTGTCTGTATTCTGATTTATCCACTAGGTGAGTCTGGTTGGTTCTTTGCACCT  
AGTTTTGGTGTAGCAGCTATATTTTCGATTATCCTCTTTTTTCAAGGATTTTATAATTGGACGCTAAACCCATTTATAT  
GATGGGAGTTGCCGGCGTATTGGGTGCTGCTTTGCTATGCGCGATTATGGTGCTACTGTAGAAAATACTTTATTTGAAG  
ATGGTGATGGTGCAAATACATTCCGCGCTTTTAAACCAACTCAAGCTGAAGAACTTATTCAATGGTACCAGTAACCGC  
TTTTGGTCCCAAATCTTTGGGGTTGCTTTTTCCAATAAACGTTGGTTACATTTCTTTATGTTATTTGTACCAGTAACGGG  
TTTTATGGATGAGTGTCTTTGGAGTAGTCGGTCTGGCCCTGAACCTACGCGCCTATGACTTCGTTTTCTCAGGAAATTCGTG  
CAGCGGAAGATCCTGAATTTGAGACTTTCTACACCAAAAATATTCTATTAACGAAGGATTTCTGCTTGGATGGCAGCT  
CAAGATCAGCCTCATGAAAACCTTATATCCCTGAGGAGTTTCTACCAGTGGAAACGCTCTTTAAATGTCTGGAAGCAC  
AGGAGAACGTTCTTTTGTGATATTATTACCAGTATTCGATACTGGGTCAATCATAGCATTACTATACCTTCCCTATTCA

TTGCGGGTTGGTTATTCGTCAGTACCGGTTTAGCTTATGATGTATTTGGAAGCCCTCGGCCAAACGAATATTTTACAGAG  
AGCCGACAAGGAATTCATTAATAACTGGCCGTTTTGATCCTTTGGAACAACCTCGATGAATTTAGTAGATCATTTTATGAT  
GACTATAGATCGAACCTATCCAATTTTTACAGTACGATGGTTGGCTGTTACGGCCTAGCTGTACCTACCGTCTTTTTTT  
TGGGGTCAATATCAGCAATGCAGTTCATCCAACGATAA-----  
ATGGCTACACAACTGTTGAGACCAGT---TCT---AGATCTCGT-----  
CCAAAACCAACTATTGTAGGGAGTTTATTAACCATTGAATTCGGAATATGGTAAAGTAGCTCCCGGGTGGGGAACGAC  
TCCTTTGATGGGTGTGCAATGGCTCTATTTGCGGTATTTCTTTCTATTATTTGGAAATTTATAATTCTTCCGTTTTAT  
TGGATGGAATTTCAATGAATTA-----  
ATGCTTACTCTGAAACTCTTCGTTTATACCGTAGTGATATTTTTGTTTTCTCTTTCATCTTTGGATTCTATCTAATGA  
TCCAGGACGTAATCCTGGACAACGTGAAGAATA---  
ATGGCCGATACTACTGGAAGGATTCCTCTTTGGATAATAGTACTGTAACCTGGTATTCTTGTGATCGGTTTATGTTGGTAT  
TTTCTTTTATGGTTTCAATTTCCGGATTGGGCTCATCCCTGTAG-----ATGCTT-----  
AATATCTTTAGTTTATCTCTATTTGTCTTAATTCTGCCCTT---TATTG-----  
AGTAGTTTTTTCTTCGGCAAATTGCCGAAGCCTATGCTTTTTTGAATCCAATCGTAGATGTTATGCCAGTCATACCTGT  
GTTTTTTTTCTCTTAGCCTTTGTTGGCAAGCTGCTGTAAGTTTTTCGATGAATGACACAATCA-----  
AACCCGAACGAACAAATGTTGAATTGAATCGTACCAGTCTCTACTGGGGGTTATTACTCATTTTTGTACTTGTGTTTT  
ATTTTCCAATTATTTCTTCAATTAGATG---  
GAAGTAAATATTCTTGCATTTATTGCTACTGCATTTATTCTAGTTTCTACCGCTTTCTACTTATCATTTACGTA  
AACAGTCAGTCAAAAT-----GATTAA-----  
ATGGAACAGCAACGCTAGTCGCCATCTTTCTATCTGGTTTACTTGTGAGTTTTACTGGGTACGCCTTATATACCGCTTT  
TGGGCAA---  
CCTTCTCAACAATAAGAGATCCATTTCGAGGAACATGGGGACTAGATGGAAGCATTGGTTTTATACATTCTCTTAGTCTC  
GACTCTAGGGATAATTTTTTCGCTATCTTTTTTCGAGAACCGCCAAAGTTCCG-----  
ACTAAAAGGTGAAATGAATGACTCTTGTTTTCCAATTGGCTGTTTTTGCATTAATTGCTACTTTCATCAATCTTATTGAT  
TAGTGTACCCGTTGTATTTGCTTCTCCTGATGGTTGGTCAAGTAACAAAATGTCGTATTTCCGGTACATCATTATGGA  
TTGGGTTAGTCTTTCTGGTGGGTATCCTTAATTCTCTCATCTCTTGAATGTCACCACAAACAGAGACTAAAGCAAGTGT  
GGATTCAAAGCAGGTGTTAAAGAGTACAAATTGACTTATTATACTCTGAATACGAAACAAAGATACGGATATCTTGGC  
AGCATCCGAGTAACCTCAACCTGGAGTTCGCCCTGAAGAAGCAGGGGCTGCGGTAGCTGCCGAATCTTCTACTGGTA  
CATGGCAACTGTGTGGACCGATGGACTTACCAGTCTTGTATCGTTACAAAGGGCGATGTACCATATTGAGCCCGTTCT  
GGAGAAACAGATCAATATATCTGTTATGTAGCTTACCCTTAGACCTTTTTGAAGAAGGTTCTGTTACTAACATGTTTAC  
TTCCATTGTGGTAATGTATTTGGGTTCAAAGCCCTGCGTGCTCTACGTCTGGAAGATCTGCGAATCCCCCTGCTTATA  
TAAAACCTTTCCAAGGCCCGCCCATGGGATCCAAGTTGAGAGAGATAAATTGAACAAGTACGGTTCGTTCCCTGTTGGGA  
TGTACTATTAACCAAAATTAGGGTTGTCCGCTAAAACCTATGGTAGAGCAGTTTATGAATGTCTTCGCGGTGGACTTGA  
TTTTACCAAAAGATGATGAGAACGTGAACTCCAGCCATTTATGCGTTGGAGAGATCGTTTCTTATTTTGTGCCGAAGCAA  
TTTATAAATCACAGGCTGAAACAGGTGAAATCAA-----  
GGGCATTACTTGAATGCTACTGCGGGTACATCCGAAGAAATGATCAAAAGAGCTGTATTTGCTAGAGAATTGGGAGTTCC  
TATCGTAATGCATGACTACTTAACAGGAGGATTTACTGCAAATACTAGCTTGGCTCATTATTGCCGAGATAATGGACTAC  
TTCTTACATTCACCGTGCAATGCATGCAGTTATTGATAGACAGAAGAATCATGGTATACACTTCC

Lactuca

TCTAGGTTGGGGGGTGGGTCCTGGTGGGGAAGTTATAGATACTTTCCATACTTTGTATCCGGAGTACTTCAATTAATTT  
CCTCTGCAGTATTGGGCTTTGGCGGTATTTATCATGCACTTTTAGGGCCTGAGACGCTTGAAGAATCTTTTCCATTCTTC  
GGTTATGTATGGAAAGATAGAAATAAAATGACCACAATTTTAGGTATTTACTTAACTTGTAGGTATAGGTGCTTTTCT  
TCTAGTATTCAAGGCTCTTTATTTTGGGGCGTATATGATACTTGGGCTCCGGGAGGA---GGAGATG---  
TAAGAAAAATAACCAACTTGACGCTTAGCCCAAGTATCATATTTGGTTATTTACTAAAATCGCCCTTTGGGGGAGAAGGA  
TGGATTGTTAGTGTAGACGATTTGGAAGATATAATCGGAGGCCATGTATGGTTAGGTTCC---  
ATTTGTATACTTGGTGGAAATTTGGCATACTTAACCAAAACCTTCGCATGGGCTCGACGAGCACTGTATGGTCTGGAGA  
GGCTTACTTATCTTATAGTTTTAGCGGCTATATCTGTCTTTGGTTTTCAATTGCTTGTGTTTTGTCTGGTTCAATAATACCG  
CTTATCTAGTGTGTTTTACGGACCCACTGGACCAGAAGCTTCTCAAGCTCAAGCATTACTTTTCTAGTTAGAGACCAA  
CGTCTTGGAGCTAACGTTGGATCTGCTCAAGGCTTACCAGTTTGGTAAATATTTAATGCGTTCCCCGACTGGAGAAGT  
CATTTTTGGAGGAGAACTATGCGTTTTTGGGATCTGCGTGCTCCTTGGTTAGAACCCTAAGGGGTCCAAATGGGTTGG  
ACTTAAGTCGGCTGAAAAAAGACATACAA---  
CCTTGGCAAGAACGTCGTTCCGCAGAATATATGACCCATGCTCCTTTAGGTTCTTTAAATTCGGTGGGTGGCGTAGCTAC  
CGAGATCAATGCAGTCAATTATGTCTCTCCTAGAAGTTGGTTAGCTACTTCTCATTTTGTTCTAGGATTCTTCTTCTTCG  
TAGGGCATTGTGGCACGCAGGAAGAGCTCGTGCAGCTGCAGCAGGATTTGAAAAGGAATTGATCGTGATTTTGAACCT  
GTTCTTTCCATGACCCCTCTTAATTGATTGAATAGGAGGATTACGATGACTATAGCCCTTGGTAAAGTTACCAAAGACGA  
A-----  
AATGATTTGTTTATGATATTATGGATGACTGGTTACGGAGGGACCGTTTTCGTTTTTGTAGGCTGGTCCGGCCTATTGCTCTT

TCCTTGTGCCTATTTTCGCTGTAGGGGGTTGGTTACAGGTACAACCTTTGTAACTTCATGGTATACCCATGGATTGGCCA  
GTTCCATTTTGAAGGCTGCAATTTCTTAACTGCCGCAGTTTCTACTCCTGCGAATAGTTTAGCACATTCTTTGTTATTA  
CTATGGGGTCTGAAGCACAAGGAGATTTTACTCGTTGGTGTCAATTAGGCGGTCTGTGGACTTTTGTGCTCTCCACGG  
CGCTTTCGGACTAATAGGTTTTATGTTGCGTCAATTCGAACCTTGC CGCATCTGTTCAATTGCGACCTTATAATGCAATCG  
CATTCTCTGGTCCAATTGCCGTTTTTGTCTGTATTCTGATTTATCCACTAGGTGAGTCTGGTTGGTTCTTTGCGCCT  
AGTTTTGGTGTAGCAGCTATATTTTCGATTTATCCTCTTTTTTCAAGGATTTTCATAACTGGACATTGAACCCATTTTCATAT  
GATGGGAGTTGCAGGTGTATTGGGCGCTGCTTTGCTATGCGCTATTTCATGGTGTACCGTAGAAAATACTTTATTTGAAG  
ATGGTGATGGGGCAAATACATTCCGTGCTTTTAAACCAACTCAAGCTGAAGAACTTATTCAATGGTCACTGCTAATCGT  
TTTTGGTCCCAAATCTTTGGGGTTGCTTTTTCCAATAAACGTTGGTTACATTTCTTTATGTTATTTGTACCAGTAACTGG  
TTTATGGATGAGTGTCTTTGGAGTAGTCGGTCTGGCCTTGAACCTACGTGCCTATGACTTCGTTTCTCAGGAAATTCGCG  
CGGCGGAAGATCTGAATTTGAACTTTTACACCAAAAAATTTCTCTTAAACGAAGGTATTCTGTGCTTGGATGGCGGCT  
CAAGATCAGCCTCATGAAAACCTTATATTCCCTGAGGAGTTTACCCCGTGGAAACGCTCTTTAAATGTCTGGAAGCAC  
AGGAGAACGTTCTTTTGTGATATTATTACCAGTATTGCTACTGGGTCAATCATAGCATTACTATACCTTCCCTATTCA  
TTGCGGGTTGGTTATTGCTCAGCACTGGTTTAGCTTACGATGTGTTTGGAAAGCCCTCGGCCAAACGAGTATTTACAGAA  
AACCGACAAGGAATTCATTAATCACCGGCCGTTTTGATTCTTTGGAACAACCTCGATGAATTTAGTAGATCTTTTTAGAT  
GACCATAGATCGAACCTATCCAATTTTTACAGTGCATGGTTGACTGTTACCGCCTAGCTGTACCTACCGTTTTCTTTTT  
TGGGGTCAATATCAGCAATGCAGTTCATACAACGATAA-----  
ATGGCTACACAACTGTTGAGAACGGT---GCT---AGATCTGGT-----  
CCAAGACGAACACTGTAGGGGATTTATTTAAACCATTGAATTCGGAATATGGTAAAGTAGCTCCTGGGTGGGGAACGC  
CCCTTTGATGGGTGTCGCAATGGCTCTATTTGCGGTATTTCTATCTATTATTTTGGAGATTTATAATTCTTCCGTTTTAT  
TGGATGGAATTTCAATGAATTAG-----  
ATGCTTACTCTCAAATTTTTCGTTTACACAGTAGTAATATTCTTTGTTTCTCTCTTCATCTTTGGATTCCATCCAATGA  
TCCAGGACGTAATCCTGGA---CGTGAAGAATAA---  
ATGGCCGATACTACTGGAAGAATTCCTCTTTGGATAATAGGTACTGTAGCTGGTATTCTTGTGATCGGTTTAGTAGGTGT  
TTTCTTTTATGGTTTCATATTCCGGATTGGGTTTCATCCCTGTAG-----ATGCTT-----  
AATATCTTTAGTTTGTATCTGT-----CTTAAATTCTGCCCTT---TATCCG-----  
AGTAGTCTTTTCTTCGCCAAATTTGCCGAAGCCTATGCTTTTTTGAATCCAATCGTAGATGTTATGCCAGTCATACCCCT  
GTTCTTTTTTCTTTTAGCCTTTTGGTTTGGCAAGCTGTGTAAGTTTTCGATAAACGACACAATCA-----  
AACCCAAACGAACAAAATTTGAATTTGAATCGTACCAGCCTCTACTGGGGGTTATTACTCATTTTTGTACTTGTGTTTT  
ATTTTCCAATTTATTTCTTCAATTAATG---  
GAAGTAAATATTCTTGCAATTTATTGCTACTGCACTGTTTCAATTTTAGTTTCTACTGCTTTTCTACTTATCATTACGTAAA  
AACAGTCAGTCAAAAT-----AATTA-----  
ATGGAAACAGCAACCCTAGTCGCTATCTTTATATCTGGTTTACTTGTAAAGTTTTACTGGGTACGCCTTATATACCGCTTT  
TGGGCAA---  
CCTTCTCAACAAC TAAGAGATCCATTTCGAGGAACACGGGGACTAAATGGAAGCATTGGTTTTATAACATTCTTCTTAGTCTC  
GACTCTAGGGATAATTTTTTTCGCTATCTTTTTTAGAGAACCTCCAAAAGTTCCA-----ACTAAAAA---TAA-  
--  
ATGACTCTTGCTTTCCAATTGGCTGTTTTTGCATTAATTGCTACTTTCATCAATCTTATTGATTAGCGTACCCGTTGTATT  
TGCTTCTCCTGATGGTTGGTCAAGTAACAAAAATGTTGTATTTTTCAGGTACATCATTATGGATTGGATTAGTCTTTCTGG  
TGGGTATCCTTAATTTCTCTCATCTCTTGAATGTACCACAAACAGAGACTAAAGCAAGTGTGGATTCAAAGCTGGTGT  
AAAGATTATAAATTGACTTATTATACTCCTGAGTATGAAACCAAGGATACTGATATTTTGGCAGCATTTCGAGTAACTCC  
TCAACCTGGAGTTCGCGCTGAAGAAGCAGGGGCCGAGTAGCTGCCGAATCTTCTACTGGTACATGGACAACCTGTGTGGA  
CCGATGGACTTACGAGCCTTGATCGTTACAAAGGGCGATGCTATGGAATCGAGCCTGTTCTGGAGAAGAAAATCAATAT  
ATTGCTTATGTAGCTTACCCATTAGACCTTTTTGAAGAAGGTTCTGTTACTAACATGTTTACTTCCATTGTAGGTAATGT  
ATTTGGGTTCAAAGCCCTGCGTGTCTACGTCTGGAAGATTTGCGAATCCCTACTGCGTATGTTAAAACCTTTCCAAGTCT  
CGCCTCACGGCATCCAAGTTGAGAGAGATAAATTGAACAAGTATGGTCGTCCTGTTGGGATGTACTATTAACCTAAA  
TTGGGGTTATCCGCTAAAAACTACGGTAGAGCTGTTTATGAATGTCTTCGTGGTGGCCTTGATTTTACTAAAGATGATGA  
GAACGTGAACTCCAACCATTTATGCGTTGGAGAGACCGTTTCTATTTTTGTGCCGAAGCTATTTTTAAATCACAAGCTG  
AAACAGGTGAAATCAA-----  
GGGCATTACTTGAATGCTACTGCGGGTACATGCGAAGAAATGATGAAAAGGGCTATATTTGCCAGAGAATTGGGAGTTCC  
TATCGTAATGCATGACTACCTAACAGGGGGATTCACTGCAAATACTAGCTTGGCTCATTATTGCCGAGATAATGGTCTAC  
TTCTTACATCCACCGCGCAATGCATGCAGTTATTGATAGACAGAAGAATCATGGTATACACTTCC  
Liriodendron  
TCTAGGTTGGGGGGTAGGTCCGGGTGGGGAAGTTGTAGACACCTTTCCATATTTTGTATCTGGAGTACTTCACTTAATTT  
CCTCTGCAGTTTTAGGCTTTGGCGGTATTTATCATGCACTTCTCGGACCTGAGACTCTTGAAGAATCCTTTCCATTCTTC  
GGTTATGTATGGAAAGATAGAAATAAAATGACCACAATTTTGGGTATTCATTAATCTTGTAGGTATAGGCGCTTTTCT  
TCTAGTACTCAAAGCTCTTTATTTTTGGGGCGTATATGATACCTGGGCTCCCGGGGG---GGAGATG---

TAAGAAAAATTACCAACTTGACCCTTAGCCCAAGTGTATATTTGGTTATTTACTAAAATCGCCCTTTGGGGGAGAAGGA  
TGGATTGTTAGTGTGGACGATTTAGAAGATATAATTGGAGGACATGTATGGTTAGGTTCC---  
ATTTGTATACTTGGTGAATCTGGCATATCTTAACCAAACCCTTTGCGTGGGCTCGCCGCGCATTGTATGGTCTGGAGA  
GGCTTACTTGTCTTATAGTTTGGTGTCTTATCTGTCTTTGGTTTCATCGCTTGTGTTTTGTTTGGTTCAATAATACCG  
CTTATCCTAGTGAGTTTTACGGGGCCACCAGGGCCAGAAGCTTCTCAAGCTCAAGCATTACTTTTTCTAGTTAGAGACCAA  
CGTCTTGGGGCTAACGTGGGATCCGCTCAAGGACCTACTGGTTTGGTAAATATCTAATGCGTTCCCCGACCGGAGAGGT  
CATTTTCGGAGGAGAACTATGCGTTTTTGGGATCTCCGCGCTCCCTGGTTGGAACCTCTAAGGGGTCCCAATGGTTTGG  
ATTTGAGTAGGCTGAAAAAAGACATACAA---  
CCTTGGCAAGAACGACGTTTCGGCGGAATATATGACTCATGCTCCTTTAGGTTCTTTAAATTCCGTGGGTGGCGTAGCTAC  
CGAGATCAATGCAGTTAATTATGTCTCTCCTAGAAGTTGGTTAGCTACCTCTCATTGTTCTAGGATTCTTCCTATTTCG  
TGGGTCACTGTGGCATGCGGGAAGGGCCCGTGCAGCTGCAGCAGGATTTGAAAAAGGAATCGATCGTATTGTTGAACCC  
GTTCTTTCCATGACCCCTCTTAAC-----  
ATGACTATAGCCCTTGGTAGATTTACCAAAGAAGAA-----  
AATGATTTATTTGATATTATGGATGACTGGTTACGGAGGGACCGTTTTCGTTTTTGTAGGTTGGTCCGGTCTATTGCTCTT  
TCCTTGTGCTTATTTTCGCTTTAGGAGGTTGGTTACAGGTACAACCTTTGTAACCTTCATGGTATACCCATGGATTGGCCA  
GTTCTTATTTGGAAGGCTGCAATTTCTTAACCGCTGCAGTTTCTACTCCTGCTAATAGTTTAGCACATTCTTTGTTGCTA  
CTATGGGGCCCTGAAGCACAAGGAGATTTACTCGTTGGTGTCAATTAGGCGGTCTGTGGACTTTTGTGCTCTCCATGG  
CGCTTTCGGACTAATAGGTTTTCATGTTACGTCAATTCGAACCTTGTCTGATCTGTTCAATTGCGACCTTATAATGCAATCG  
CATTCTCTGCTCCAATTGCTGTTTTTGTCTGTATTCTGATTTATCCCCTAGGTCAGTCTGGTTGGTTCTTTGCGCCC  
AGTTTTGGTGTAGCAGCTATATTTTCGATTCATCCTCTTCTTCCAAGGATTTTATAATTGGACGTTGAACCCATTTTCATAT  
GATGGGAGTTGCCGGAGTATTGGGCGCTGCTCTGCTATGCGCTATTTCATGGTGTACCGTAGAAAATACTTTATTTCGAAG  
ATGGTGATGGTGCAAATACATTCCGTGCTTTTAACCAAACCTCAAGCTGAAGAGACTTATTTCGATGGTCACTGCTAACCCG  
TTTTGGTCCCAAATCTTTGGGGTTGCTTTTTCCAATAAACGTTGGTTACATTTCTTTATGTTATTTGTACCAGTAACCGG  
TTTATGGATGAGTGCTATTGGAGTAGTCGGTCTGGCTCTGAACCTACGTGCCTATGACTTCGTTTTCCAGGAAATCCGTG  
CAGCGGAAGATCCTGAATTTGAGACTTTCTACACCAAAAATATTCTCTTAAACGAAGGTATTTCGTGCTTGGATGGCGGCT  
CAGGATCAGCCTCATGAAAACCTTATATTCCCTGAGGAGGTTCTACCCCGTGGAAACGCTCTT---  
ATGTCTGGAAGCACGGGAGAACGTTCTTTTGTGCTGATATTATTACCAGTATTCGATACTGGGTCAATTCATAGTATTACTAT  
ACCTTCCCTATTTCATGCGGGTTGGTTATTTCGTTAGCACGGGTTTAGCTTACGATGTGTTTGGAAAGCCCTCGGCCAAACG  
AGTATTTACAGAGAGCCGGCAAGGGATTCCATTAATAACTGGCCGTTTTGATCCTTTGGCACAACTTGATGAATTTAGT  
AGATCCTTT---  
ATGACCATAGATCGAACCTATCCAATTTTTACAGTGCATGGTTGGCTGTTTACGGACTAGCTGTACCTACCGTTTTCTTT  
TTTGGGGTCAATATCAGCAATGCAGTTCATCCAACGA-----  
ATGGCTACACAAACCGTTGAGGGTAGT---TCT---AGATCTGGG-----  
CCAAGACGAACCTATTACAGGGGATTTATTGAAACCATTGAATTCGGAATATGGTAAAGTGGCTCCTGGATGGGGAACTAC  
CCCCTTCATGGGTGTGCAATGGCTCTATTTGCGATATTCTATCTATTATTTTGGAGATTTATAATTCTTCCGTTTTAC  
TGGATGGAATTTCAATGAGT-----  
ATCTATTCCCTTATTTTCCCCAAAATGATCTTGGAGATTGTGTAATGCTTACTCTCAAACCTCTTCGTTTACACAGTAGT  
GATATTCTTTGTTTCTCTCTTTCATCTTCGGATTCTATCTAATGATCCAGGACGTAATCCTGGA---CGCGAGGAA----  
--  
ATGGCCGATACTACTGGAAGGATTCCCTCTTTGGCTGATAGGTACTGTAACCTGGTATTCCCTGTGATCGGTTCAATGGGTAT  
TTTCTTTTACGGTTCATATTCTGGATTGGGATCATCCCTA-----ATGCTT-----  
AATATCTTTAGTTTGGATCTGTATCTGTATTAATTCTGCCCTT---CATTG-----  
AGTAGCTTTTTCTTCGCCAAATTACCCGAGGCTTATGCTTTTTTCAATCCAATCGTAGATGTTATGCCAGTCATACCTGT  
GCTCTTTTTTCTCTTAGCCCTTGTGGCAAGCTGCTGTAAGTTTTCGA---ACGACACAATCA-----  
AACCCGAACGAACAAAATGTTGAATTGAATCGTACCAGTCTCTACTGGGGGTTATTACTCATTGTTTGTACTTGTGTTTT  
ATTTTCCAATTTCTTCAAT---ATG---  
GAAGTCAATATTCTCGCATTTATTGCTACTGCGCTGTTTCAATCTAGTTTCTACTGCTTTTTTACTTATCATCTACGTAAA  
AACAGTCAGTCAAAT-----GAT-----  
ATGGAAACAGCAACCCTAGTCGCCATCTCCATATCTGGTTCACTTGTAAAGCTTTACTGGGTACGCCTTATATACCGCTTT  
TGGGCAA---CCCTCTCAACAACCTAAGAGATCCATTGAGGAACACGGGGAC---  
ATGGAAGCATTGGTTTATACATTCCTGTTAGTCTCGACTTTAGGGATAATTTTTTTTTCGCTATCTTTTTTTCGAGAACCACC  
TAAGGTTCCG-----ACTAAAAG-----  
ATGACTATTGCTTTCCAATTGGCTGTTTTTGCATTAATTGCTACTTTCATCAATCTTACTGATTAGTGTACCCGTTGTATT  
TGCTTCTTCTGATGGTTGGTCAAGTAACAAAATGTTGTATTTTCTGGTACATCATTATGGATTGGATTAGTCTTTCTGG  
TAGCTATCCTTAATTCTCTCATCTCT---  
ATGTCACCACAAACAGAGACTAAAGCAAGTGTGGATTCAAAGCTGGTGTAAAGAGTACAAATTGACTTATTATACTCC  
TGAATATGAAACCAAAGATACTGATATCTTGGCAGCATTCCGAGTAACTCCTCAACTCGGAGTTCGCGCTGAGGAAGCAG



GGGCTGCGGTAGCTGCCGAATCTTCTACTGGTACATGGACAACCTGTGTGGACCGATGGACTTACCAGCCTTGATCGTTAC  
AAAGGACGATGCTACCACATCGAACCCGTTGCTGGGGAGACCGATCAATATATTGTTTATGTAGCTTACCCTTTAGACCT  
TTTTGAAGAAGGTTCTGTTACTAACATGTTTACTTCCATTGTGGGTAATGTATTTGGGTTCAAAGCCCTACGAGCTCTAC  
GTCTGGAAGATCTGCGAATTCCTCCTGCTTATATCAAAACTTTCCAAGGCCCGCCCATGGCATCCAAGTTGAGAGAGAT  
AAATTGAACAAGTATGGTCGTCCCCTATTGGGATGTACTATTAACCAAATTTGGGGTTATCCGCCAAGAACTACGGTAG  
GGCGGTTTATGAATGTCTCCGTGGTGGACTTGATTTTACCAAGGATGATGAGAACGTGAACTCCCAACCATTTATGCGTT  
GGAGAGACCGTTTCTTATTTTGTGCCGAAGCACTTTATAAAGCGCAGTCCGAAACAGGTGAAATCAAA-----  
GGACATTACTTGAATGCTACTGCAGGTACATGCGAAGAAATGATGAAAAGGGCCGTATTTGCCAGGGAATTGGGAGTTCC  
TATCGTAATGCATGACTACTTAACGGGAGGATTCACTGCAAATACTAGCTTGGCTCATTATTGCCGAGACAACGGTCTAC  
TTCTTACACATCCATCGCGCAATGCATGCAGTTATTGATAGACAGAAGAATCATGGTATACACTTTC

Lotus

TCTAGGTTGGGGGTCGGTCTCGGGGAGAGGTTATAGACACCTTCCCATACTTTGTTTCTGGAGTACTTCACTTAATTT  
CCTCTGCGGTATTAGGATTTGGCGGTATTTATCATGCACTTCTGGGACCTGAGACTCTTGAAGAATCTTTTCCATTTTTC  
GGTTATGTATGGAAAGATAGAAATAAAATGACTACCATTTTGGGTATTCACTTAATCTTGTAGGTATAGGGGCTTTTCT  
TCTAGTATTCAAGGCTTCTTATTTTGGGGTATATATGATACTTGGGCTCCCGGGGA---GGAGATG---  
TAAGAAAAATTACCAATTTGACCCTTAGTCCAAGTATTATTTGGTTATTTACTAAAATCACCTTTTGGGGGAGAGGGG  
TGGATTGTTAGTGTGGACGATTTGGAAGACATAATTGGGGGACATGTATGGTTGGGTTCC---  
ATTTGTATACTTGGTGGAACTCTGGCATATTTTAACAAAACCTTTGCATGGGCTCGGCGTGCCTAGTATGGTCTGGAGA  
AGCTTACTTGTCTTATAGTTTACGAGCTTTATCCGTTTTTGGTTTTATTGCTTGTGCTTTGTCTGGTTAATAATACCG  
CTTATCCTAGTGAGTTTTATGGACCCACTGGACCAGAAGCTTCTCAAGCTCAAGCATTACTTTTCTAGTTAGAGACCAA  
CGTCTTGGGGCTAATGTAGGATCCGCTCAAGGGCCTACCGGTTTAGGTAATACCTAATGCGTTCTCCGACCGGAGAAGT  
CATTTTGGAGGAGAACTATGCGGTTTTGGGATCTTCGTGCTCCTTGGTTGGAACCTCTAAGGGGTCCAATGGTTTGG  
ACTTGAGTAGACTCAAAAAGACATACAG---  
CCTTGGAAGAACGTCGTTCCGCGGAATATATGACTCACGCTCCTTTAGGTTTCTTAAATTCCTGGGGGGTGTAGCTAC  
GGAGATCAATGCAGTCAATTACGTTTCTCCTAGAAGTTGGTTAGCTACTTCTCACTTTGTTCTAGGATTCTTTCTATTTCG  
TGGGTCATTTATGGCACGCTGGAAGAGCTCGCGCAGCTGCCGCGGGATTTGAAAAGGAATTGATCGAGATTTTGAACCT  
GTTCTTTCCATGACTCCACTTAAT-----  
ATGACTATAGCTCTTGGTAAATTTACCAAAGATGAA-----  
AATGATTTATTTGATATTTAGGATGACTGGTTACGTTCGGGACCGTTTTCGTTTTTGTGGGTTGGTCCGGTCTATTGCTCTT  
CCCTTGTGCCTATTTTCGCTTGGGGGGTGGTTTACAGGTACCACCTTTGTAACCTTCATGGTATACTCATGGATTGGCAA  
GTTCTTATTTGGAGGGCTGTAATTTCTTAACCGCTGCAGTTTCGACCCCTGCTAATAGTTTACGACACTCTTTGTTGTTA  
CTATGGGGTCTGAAGCACAGGGAGATTTTACCCGTTGGTGTCAATTAGGAGGTCTGTGGACTTTTGTGCTCTCCACGG  
TGCTTTCCGATTAATAGGTTTTCATGTTACGTCAATTTGAACTCGCTCGATCTGTTCAATTACGGCCTTATAATGCAATTG  
CATTTTCTGGTCCAATTGCTGTTTTTGTCTGTTTCTGATTTATCCACTAGGTGAGTCTGGTTGGTTCTTTGCACCT  
AGTTTTGGTGTAGCAGCTATATTTTCGATTTCCTCTTTTTTCCAAGGGTTTATAATTGGACATTGAACCCATTTTCATAT  
GATGGGAGTTGCAGGTGTATTGGGCGCTGCCCTACTATGCGCTATTTCATGGTGTACCGTGGAAAATACATTATTTGAAG  
ATGGTGATGGCGCAAATACATTCCGTGCTTTTAAACCAACCCAAGCTGAAGAACTTATTCGATGGTACCAGTAAACCGT  
TTTTGGTCTCAAATCTTTGGGGTTGCTTTTTTCCAATAAACGTTGGTTACATTTCTTTATGTTATTTGTACCAGTAACTGG  
TTTGTGGATGAGTGTCTTGGAGTAGTCGGTCTGGCCCTGAACCTACGTGCCTATGATTTTCGTTTCTCAAGAAATACGCG  
CAGCGGAAGATCCTGAATTTGAGACTTTCTACACAAAAAATATTCTTAAACGAAGGTATTTCGTGCGTGGATGGCAGCT  
CAAGATCAGCCTCATGAAAACCTTATATCCCTGAGGAGGTTCTACCACGTGGAAACGCTCTT---  
ATGTCTGGAAGCACAGGAGAACGTTCTTTTCGCTGATATTATTACCAGTATTCGATACTGGATTATTCATAGCATTACTAT  
ACCCTCCCTATTCATCGCGGGTGGTTATTTGTGAGCAGGGTTTAGCTTACGATGTATTTGGAAGTCCCGCTCCAAACG  
AGTATTTTACAGAGAGCCGACAAGGAATTCCTTTAATAACAGGCCGTTTTGATCCTTTGGAACAACCTCGATGAATTTAGT  
AGATCTTTT---  
ATGACCATAGATAGGACCTTTCCAATTTTACAGTACGATGGTTAGCTGTTTACGGACTAGCGGTACCCACCGTTTCTTT  
TTTGGGATCAATATCAGCAATGCAGTTTATCCAACGA-----  
ATGGCTACACAAACCGTTGAGGATAGT---TCT---AGAGCTCGT-----  
CCAAGACAAACTTCTGTAGGGAGTTTATTGAAACCGTTGAATTGAGAATATGGTAAAGTCGCTCCGGGGTGGGGAACCTAC  
TCCTTTGATGGGTATTGCAATGGCTCTATTTGCAATATTTCTATCTATTATTTGGAAATTTATAATTCTTCTATTTTAC  
TAGACGGAATTTCTATGAAT-----  
ATGCTTACTTTAAAATTTATTTGTTTACACAGTAGTGATATTCTTTGTTTTCGCTTTTTCATCTTTGGATTCTTATCTAACGA  
CCCAGGACGTAATCCAGG---CGTGAAGAG-----  
ATGGCCGATACTACTGGAAGGATTCTCTTTGGATAATAGGTACTGTAACCTGGTATTACTGTGATCGGTTTAAATTGGTAT  
TTTTTTTTATGTTTCGATTCCGGATTGGGATCATCCCTG-----ATGATT-----  
AATATCGTTAGCTTGGTCTGTATTTATATTAACCTCTGTCCCT---TATTCA-----  
AGTATTTTTTTCTTGGATAAATTGCCCGAGGCCTACGCTTTTTTGAATCCAATTGTAGATATTATGCCAGTAATACCCCT

ATTCTTTTTCTTTTAGCTTTTGTGGCAAGCCGCTGTAAGTTTTCGA---ACGACACAATCA-----  
AACCCAAATGAACAAAGTGTGAATTGAATCGTACCAGTCTTTACTGGGGTTATTACTCATTTTTTGTGCTTGCTGTTTT  
ATTTTCAAATTATTTCTTCAAT---ATG---  
GAAGTAAATATTCTCGCATTATTGCTACTGCGCTCTTCATTCTAGTTCCTACAGCCTTTTTACTAATAATTTACGTAAA  
AACGGTAAGTCAAAGT-----GAC-----  
ATGGAAACAGCAACCCTAGTTGCCATCTCTATATCTGGTTTTACTTGTAAAGTTTTACCGGGTATGCCTTATATACCGCTTT  
TGGGCAA---CCCTCGCAACAATAAGAGATCCATTCGAAGAACATGGGGAC---  
ATGGAAAGCATTGGTTTTATACATTCCTCTTAGTCTCGACTTTAGGAATCATTTTTTTCGCTATCTTTTTTAGAGAACCTCC  
CAAAGTTCCA-----  
ATGACTATCGCTTTCCAATTAGCTGTTTTTGCATTAATTGCTACTTCATCCATTTTATTGATTAGTGTACCTGTTGTATT  
TGCTTCTCCTGATGGTTGGTTCGAGTAATAAAAATGTTGTATTTCTGGTACATCATTATGGATTGCATTAGTATTCTAG  
TGGGTATTTCTTAATTCTCTCATCTCC---  
ATGTCACCACAAACAGAACTAAAGCAAGTGTGGGTTCAAAGCTGGTGTAAAGATTATAAATTGACTTATTATACTCC  
TGACTATGAAACCAAAGATACTGATATCTTAGCAGCATTCCGAGTAACTCCTCAACCTGGAGTTCACCTGAAGAAGCAG  
GTGCTGCGGTAGCTGCCGAATCTTCTACTGGTACATGGACAACCGTGTGGACCGATGGGCTAACCCAGTCTTGATCGTTAC  
AAAGGACGATGCTACCACATCGAGCCTGTTTCTGGAGAAGAAAGTCAATTCATTGCTTATGTAGCTTATCCTTTAGACCT  
TTTTGAAGAAGTTCTGTTACTAACATGTTTACTTCCATTGTAGGTAATGTATTTGGGTTCAAGGCTCTTCGCGCGCTAC  
GTCTGGAGGATTTGCGAATTCCTAATGCTTATGTTAAAACGTTCCAAGGTCCTCCTCACGGAATCCAAGTGGAAAGAGAT  
AAATTGAACAAGTATGGTCTCTCTATTGGGATGTAATAAACCTAAATTGGGGTTATCCGCTAAGAATTACGGTAG  
AGCAGTTTATGAATGCTTCGCGGGGGACTTGATTTTACTAAAGATGATGAAAATGTGAACCTCAACCATTTATGCGTT  
GGAGAGACCGTTTCTTATTTTGTGCTGAAGCGCTTTTTAAAGCACAGGAAGAAACAGGTGAAATCAAA-----  
GGGCATTACTTGAATGCTACTGCCGGTACATGCGAAGAAATGATGAAAAGAGCGGTATTTGCCAGAGAATTGGGCGTTCC  
TATCGTAATGCACGATTATTTAACTGGGGGATTCACTGCAAATACTACCTTGGCTCACTATTGCCGGGATAATGGTCTAC  
TTCTTCATATCCACCGTGAATGCACGCAGTTATCGATAGACAGAAAATCATGGTATGCACTTCC

Morus

TCTAGGTTGGGGGTAGGGCTGGCGGGGAGGTTCTAGACACCTTTCCATACTTTGTATCTGGAGTACTTCACTTAATTT  
CCTCTGCAGTATGGGCTTTGGCGGTATTTATCATGCACCTCTGGGACCTGAGACTCTTGAAGAATCTTTCCATTCTTC  
GGTTATGTATGAAAGATAGAAAATAAAATGACTACAATTTGGGTATTCATTTAATCTTGTAGGTATAGGTGCTTTTCT  
TCTAGTATTTAAGGCTCTTTATTTTGGGGGTGTATATGATACCTGGGCTCCGGGGGG---GGAGATG---  
TAAGAAAAATTACCAATTTGACCCTTAGCCCAAGTATTTGATTTGGTTATTTACTAAAATCCCCCTTTGGTGGAGAGGGG  
TGGATTGTTAGTGTGGACGATTTGGAAGATATAAATTGGAGGACATGTATGGTTAGGTTCC---  
ATTTGTATACTTGGTGAATCTGGCATACTTAAACCAAACCCTTTGCATGGGCTCGCCGTGCACCTGTATGGTCTGGAGA  
GGCTTACTTGTCTTATAGTTTGGGTGCTTTATCCATTTTGGTTTTGTTGCTTGTGCTTTGTCTGGTTCAATAATACCG  
CTTATCCTAGTGAGTTTTACGGGCCACTGGTCCAGAAGCTTCTCAAGCTCAAGCATTACTTTTCTAGTTAGAGATCAA  
CGTCTTGGAGCTAACGTGGGATCCGCTCAAGGACCTACTGGTTAGGTAAATATCTAATGCGTTCCCCGACTGGGGAAGT  
TATTTTGGAGGGGAAACCATGCGTTTTTGGGATCTACGAGCTCCATGGTTAGAACCCTTAAGGGGTCCCAATGGTTGG  
ACTTGAGTAGGCTGAAAAAAGACATAACAG---  
CCTTGGCAAGAACGGCGTTCTGCGGAATATATGACTCACGCTCCTTTAGGTTCTTTAAATTCGGTGGGTGGCGTAGCTAC  
CGAGATCAATGCAGTCAATTATGTCTCTCCGAGAAGTTGGTTAGCTACCTCTCATTTTGTTCTAGGATTTTTCTATTTCG  
TAGGTCATTTATGGCACGCGGGAAGGGCTCGTGCAGCTGCAGCAGGATTTGAAAAGGAATTGATCGTGATTTTGAACCT  
GTTCTTTCCATGACTCCTCTTAACTGA-----  
ATGACTATAGCCCTTGGTAAATTTACCAAAGACGAA-----  
AATGATTTATTTGATATTATGGATGACTGGTTACGTAGGGACCGTTTTCGTTTTTGTAGGTTGGTCCGGTCTATTGCTCTT  
TCCTTGTGCCTATTTTCGCTTTAGGAGGTTGGTTCACAGGTACAACCTTTGTAACCTCATGGTATACTCATGGATTAGCAA  
GTTCTTATTTGGAAGGATGCAACTTCTTAACTGCCGCAGTTTCTACTCCTGCTAATAGTTTACGACACTCTTTGTTGTTA  
CTATGGGGTCTTGAAGCACAAGGCGATTTTACTCGTTGGTGTCAATTAGGTGGTCTGTGGACTTTTGTGCTCTCCACGG  
CGCTTTCGCACTAATAGGTTTTCATGTTACGTCAATTTGAACCTGCTCGACTCTGTTCAATTGCGACCTTATAATGCAATCG  
CATTCTCCGCTCCAATTGCTGTTTTTGTCTGTATTCTGATTTATCCGTTAGGTCAGTCTGGTTGGTTCTTTGCGCCT  
AGTTTTGGTGTAGCAGCTATATTTTCGATTCATCCTCTTTTTCCAAGGGTTTCATAATTGGACATTGAACCCATTTATAT  
GATGGGAGTTGCCGGGATTTGGGCGCTGCTCTGCTATGCGCCATTATGGTGGTACCGTAGAAAATACTTTATTTGAAG  
ATGGTGTAGGTGCAAATACATTCCGTGCTTTTTAACCAACTCAAGCTGAAGAACTTATTCAATGGTACCAGTAACCGC  
TTTTGGTCCCAAATCTTTGGGGTTGCTTTTTCCAATAAACGTTGGTTACATTTCTTTATGTTATTTGTACCAGTAACCTGG  
TTTATGGATGAGTGTCTTGGAGTAGTCGGTCTGGCTTTGAATCTACGTGCTTATGACTTCGTTTCTCAGGAAATCCGTG  
CAGCGGAAGATCCTGAATTTGAGACTTTCTACACCAAAAATATTCTCTTAAACGAGGGTATTTCGTGCTTGGATGGCGGCT  
CAAGATCAGCCTCATGAAAACCTTATATCCCTGAGGAGGTTTACCCCGTGGAAACGCTCTTTAAATGTCTGGAAGCAC  
AGGAGAACGTTCTTTTGTGATATTATTACCAGTATTCGCTACTGGGTCATTCATAGCATTACTATACCTTCCCTATTCA  
TTGCGGGTTGGTTATTTGTGACGACGGGTTAGCTTACGATGATTTGGAAGCCCCCGTCCAAATGAGTATTTTACAGAG

AGCCGACAAGGAATTCCATTAATAACTGGCCGTTTTGATCCTTTGGAACAACCTCGATGAATTTAGTAGATCTTTTTAGAT  
GACTATAGATAGAACCTATCCAATTTTTACAGTGCATGGTTAGCTGTTACGGACTAGCTGTACCTACCGTTTTCTTTTT  
TGGGGTCAATATCAGCAATGCAGTTCATCCAACGATAA-----  
ATGGCTACACAAACCGTTGAGGGTAGT---TCT---AGATCTGGT-----  
TCAAGACGAAGTAGTGTAGGGAATTTATTGAAACCCCTTGAATTCAGAATATGGTAAAGTAGCTCCTGGGTGGGGAACCTAC  
TCCTTTGATGGGTATCGCAATGGCTCTATTTGCGATATTCCTATCTATTATTTGGAGATTTATAATTTCTTCTATTTTAC  
TGGACGGAATTTCAATGAATTAG-----  
ATGCTTACTCTAAAACCTATTTGTTTTACACGGTAGTGATATTCTTTGTCTCTCTATTTCATCTTCGGATTCTCTATCTAATGA  
TCCAGGACGTAATCCTGGG---CGTGAAGAATAA---  
ATGGCCGATACTACTGGAAGGATTCCTCTTTGGATAATAGGTACTGTAACCTGGTATTATTGTGATCGGTTTAAATCGGTAT  
TTTTCTTTTTATGGTTTCAATTTCTGGATTAGGTTTCACTCCTTTAG-----ATGCTT-----  
AATATATTTAGTTTGTATTTGTATCTGTCTTAATTTCTGTCTT---TATTCA-----  
AGTAGTTTTTTTCGTGCGCAAATTTGCCGAGGCCTACGCTTTTTTAAATCCAATCGTAGATGTTATGCCAGTAATACCTGT  
GCTATTTTTTCTCTTAGCTTTTGTGGCAAGCTGCTGTAAGTTTTTCGATGAACGACACAATCA-----  
AACCCGAACGAACAAAATGTTGAATTAATCGTACCAGTCTCTACTGGGGGTTATTACTCATTTTTGTACTTGCTGTTTT  
ATTTTCCAATTATTTCTTCAATTAATG---  
GAAGTAAATATTCTCGCATTATTGCTACTGCCTGTTTCTAATTCCTACTGCTTTTTTACTTATAATATACGTAA  
AACAGTAAGTCAAAGT-----GATTAA-----  
ATGGAAACAGCAACGCTCGTTGCCATCTTTATATCTGGTTTACTTGTAAGTTTTACTGGGTATGCCTTATATACTGCTTT  
TGGGCAA---  
CCCTCTCAACAACCTAAGAGATCCATTTCGAGGAACACGGAGACTAGATGGAAGCATTGGTTTTATAACATTCCTCTTAGTATC  
AACTCTGGGAATAATTTTTTCGCTATCTTTTTTCGAGAACCGCTAAAGTTCCA-----  
ACTAAAAGATGAAATGAATGACTATTGCTTTCCAATTGGCTGTTTTGCAATTAATTGCTACTTCATCAATCTTACTGAT  
TAGTGTACCCGTTGTATTTGCTTCTCCTGATGGTTGGTTGGGTAATAAAAATGTTGTATTTCTGGTACATCATTATGGA  
TTACATTAGTATTTCTCGTAGGTATCCTTAATTTCTTATCTCTTGAATGTCACCACAAACAGAGACTAAAGCAAGTGTT  
GGATTCAAAGCTGGTGTAAAGATTATAAATTGACTTATTACACTCCTGAATATGAAGTCAAAGATACTGATATCTTGGC  
AGCATTTCGAGTAACCTCAACCTGGAGTTCCTCCTGAAGAAGCAGGGGCTGCGGTAGCTGCTGAATCTTCTACTGGTA  
CATGGACAACCTGTATGGACTGACGGGCTTACCAGTCTTGATCGTACAAAAGTTCGATGCTACAACCTCGAGCTCGAGCCCGTGT  
GAGAGAAGAAAGTCAATTTATTGCTTATGTAGCTTACCCTTTAGACCTTTTTGAAGAAGGTTCTGTACTAACATGTTTTAC  
TTCCATTGTGGGTAATGTATTTGGGTTCAAGCCCTGCGTGCTCTACGTCTGGAAGATTTGCGAATCCCTAATGCTTATA  
TTAAAACCTTTCCAAGGACCACCTCATGGTATCCAAGTTGAGAGAGATAAATGAACAAGTATGGCCGCCACTATTGGGA  
TGTAATAAATCAACCTAAATTTGGGGTTATCCGCTAAGAATTACGGTAGAGCAGTTTTATGAATGTCTTCGCGGTGGACTTGA  
TTTTACCAAAGATGATGAGAACGTGAATTCCTAACCCTTTATGCGTTGGAGAGATCGTTTTCTATTTTGTGCAGAAGCAA  
TTTATAAATCACAGGCTGAAACAGGTGAAATCAA-----  
GGACATTACTTGAATGCTACTGCAGGTACATGTGAAGAAATGATGAAAAGGGCTGTATTTGCCAGAGAATTGGGAGTTCC  
TATCGTAATGCATGATTACTTAAACAGGAGGATTCACTGCAAATACTACCCTGGCTCATTATTGTGCGAGATAATGGTCTAC  
TTCTTCACATCCATCGTGAATGCATGCAGTTATTGATAGACAGAAAAATCATGGTATGCACCTTC  
Nandina  
TCTAGGTTGGGGGGTAGGTCCTGGTGGGGAAGTTATAGATACCTTTCCATATTTTTGTATCTGGAGTACTTCACTTAATTT  
CCTCTGCAGTATTGGGCTTTGGCGGTATTTATCATTCACTTCTGGGACCTGAAACTCTTGAAGAATCTTTTCCATTCTTC  
GGTTATGTATGGAAAGATAGAAATAAAATGACCACCATTTTGGGTATTCATTAATTTTGTAGGTATAGGTGCTTTTTCT  
TCTAGTACTCAAGGCTCTTTATTTTGGGGGCGTATACGATACCTGGGCTCCTGGGGGG---GGAGATG---  
TAAGAAAAATTACCAACTTGACGCTTAGCCCAAGTGTTATATTTGGTTATTTACTAAAATCCCCCTTTGGGGGAGAAGGA  
TGGATTGTTAGTGTGGACGATTTAGAAGATATAATTGGAGGACATGTATGGTTAGGTTCC---  
ATTTGTATATTTGGTGGAACTCTGGCATACTTAAACCAAACCCCTTTGCGTGGGCTCGCCGAGCACTTGATGGTCTGGAGA  
GGCTTATTTGTCTTATAGTTTAGCTGCTTTATCTATCTTTGGTTTACCAGCTTGTGCTTTGTATGGTTCAATAATACCG  
CTTATCCTAGTGAATTTTACGGGGCCACCGGGCCAGAAGCTTCTCAAGCTCAAGCATTCACTTTTCTAGTTAGAGACCAA  
CGCCTTGGGGCTAACGTGGGATCCGCTCAAGGACCTACAGGTTTAGGTAATATCTAATGCGTTCCCGGACTGGAGAGGT  
CATTTTTGGAGGAGAAACTATGCGTTTTTGGGATCTCCGTGCTCCTTGGTTGGAACCTCTAAGAGGTCCCAACGGTTTGG  
ACTTGAGTAGGTTGAAAAAAGACATACAA---  
CCTTGGCAAGAGCGGCGCTCTGCGGAATATATGACTCACGCTCCTTTAGGTTCTTTAAATTCCTGGGTGGTGTAGCTAC  
CGAGATCAATGCAGTCAATTATGTTTCTCCTAGAAGTTGGTTAGCTACCTCTCATTTTGTTCTAGGATTCTTCCTATTTCG  
TGGGCCATTTATGGCATGCGGGAAGGGCCCGTGCAGCTGCAGCAGGATTTGAAAAGGAATTGATCGTGATTTGGAACCT  
GTTCTTTTTCATGACCCTCTTAAC-----  
ATGACTATAGCCCTTGGTAGATTTACCAAAGACGAA-----  
AAAGATTTATTTGATATTATGGATGACTGGTTACGGAGGGACCGTTTTCGTTTTTGTAGGTTGGTCTGGTCTATTGCTCTT  
TCCTTGTGCCTATTTTGTCTTAGGGGGCTGGTTACAGGTACAACCTTTGTAACCTTCATGGTATACCCACGGATTGGCCA

GTTCTTATTTGGAAGGCTGCAATTTCTTAACGGCCGCGAGTTTCTACCCCCGCTAATAGTTTGTAGCACATTCTTTGTTACTA  
CTATGGGGTCTCTGAAGCACAAGGAGATTTTACTCGTTGGTGTCAATTAGGCGGTCTGTGGACTTTTGTGCTCTCCATGG  
CGCTTTCGGACTAATAGGTTTTCATGTTACGCCAATTTGAACTTGCTCGATCTGTTCAATTGCGACCTTATAATGCAATCG  
CATTCTCCGGACCAATTGCCGTTTTTGTCTGTATTCTGATTTATCCATTAGGCCAATCCGGTTGGTTCTTTGCACCT  
AGTTTTGGTGTAGCAGCTATATTTTCGATTCATCCTCTTCTTCCAAGGATTTTATAATTGGACGTTGAACCCATTTTCATAT  
GATGGGAGTTGCCGGCGTATTGGGCGCTGCTCTGCTATGCGCTATTCATGGTGTACCCGTAGAAAATACTTTTATTCGAAG  
ATGGTGACGGTGCAAATACATTCCGTGCTTTTAAACCAACTCAGGCTGAAGAGACTTATTCAATGGTCACCGCTAACCGC  
TTTTGGTCCCAAATCTTTGGGGTTGCTTTTTCCAATAAACGTTGGTTACATTTCTTTATGTTATTTGTACCAGTAACCGG  
TTTATGGATGAGCGCTCTTGGAGTAGTCGGTCTGGCTCTGAACCTACGTGCCTATGACTTTGTTTTCCAGGAAATCCGTG  
CAGCGGAAGATCCTGAATTTGAGACTTTCTACACCAAAAAATATTCTTTTAAACGAAGGATTCGTGCTTGGATGGCGGCT  
CAGGATCAGCCTCATGAAAACCTTATATTTCCCGGAGGAGTTCTACCCCGTGGAAACGCTCTT---  
ATGCTGGAAGCAGGGAACGTTCTTTTGTGATATTATTACCAGTATTCGATACTGGGTCATTTCATAGCATTACTAT  
ACCTTCCCTTTTTCATTGCGGGTTGGTTATTTCGTGAGCAGCGGTTTAGCTTATGATGTGTTTGGAAAGTCCCCGACCAAATG  
AGTATTTTACAGAGAGCCGACAAGGAATTCATTAATCACAGGCCGCTTTGATTCTTTGGCGCAACTCGATGAATTTAGT  
AGATCCTTT---  
ATGACTATAGATCGAACCTATCCAATTTTTACAGTGAGATGGTTAGCTGTTACGGACTAGCTGTACCTACCGTTTCTTT  
TTTGGGGTCAATATCAGCAATGCAATTCATCCAACGA-----  
ATGGCTACACAAACCGTTGAGGGTAAT---TCT---  
AGATCTGGCCCAAGACCAAGACAAACTGGTCTAGGAAATTTATTGAAACCATTGAATTCGGAATATGGTAAAGTAGCTCC  
TGGATGGGGAACCTACCCCTTTGATGGGTGTCGCAATGGCTCTATTTGCGGTATTCCTATCTATTATTTTGGAGATTTATA  
ATTCTTCCGTTTTACTGGATGGAATTTCAATGAAT-----  
-----  
ATGCTTACTCTCAAACCTCTTCGTTTACACAGTAGTGATATTCTTTGTTTCTCTCTTCATCTTCGGATTCCCTATCTAATGA  
TCCAGGGCGTAATCCTGGA---CGCGAGGAA-----  
ATGGCCGATACTACTGGAAGGATTCCTCTTTGGCTGATAGGTACTGTAGCTGGTATTCTTATAATTGGTTTACTAGGTGT  
TTTCTTTTACGGTTCATATTCCGGATTGGGTTTCATCCCTG-----ATGCTT-----  
AATATCTTTAGTTTGTATCTGTATCTGTCTTAATTTCTGCCCTT---CATTG-----  
AGTAGTTTTTTCTTTGCTAAATTAACCGAGGCTTACGCTTTTTTCAATCCAATCGTAGATTTTATGCCAGTCATACCTGT  
GCTCTTTTTTCTTAGCCCTTGTTTGGCAAGCTGCTGAAGTTTTTCGA---  
ATGACACAATAAAATCAAATCCGAACGAACAAAATGTAGAATTGAATCGTACCAGTCTTTATTGGGGATTATTACTCAT  
TTTTGTAAGTGTGTTTTATTTTCAAATTAATTTCTTCAAT---ATG---  
GAAGTAAATATTCTCGCATTATTGCTACTGCATTGTTTATTCTAATTCCTACTGCTTTTTTACTTATCATTACGTAAA  
GACGGTCAGTCAAAT-----GAT-----  
ATGGAAACAGCAACCCTAGTCGCCATCTTTATATCTGGTTTACTTGTAAAGTTTTACCGGGTACGCCTTATATACCGCTTT  
TGGGCAA---CCCTCTCAACAATAAGAGATCCATTGAGGAACACGGGGAC---  
ATGGAAGCATTGGTTTATACATTCTCTTAGTTTTCGACTCTAGGAATCATTTTTTTTCGCTATCTTTTTTTCGAGAACCACC  
TAAGGTTCCG-----ACTAAAAGGGTGAAA---  
ATGACTATTGCTTTCCAATTGGCTGTTTTTGCATTAATTGCTACTTTCATCAATCTTATTAATTAGTGTACCCGTTGTATT  
TGCTTCTTCTGATGGTTGGTCAAGTAACAAAAATATTGATTTTTCTGGTACATCATTATGGATTGGGTTAGTCTTTCTAG  
TAGCTATCCTTAATTTCTCTCATCTCT---  
ATGTCACCACAAACAGAGACTAAAGCAAGTGTGGATTCAAAGCGGGTGTAAAGATTACAAATTGAATTATTATACTCC  
TGACTATGTAACCAAAGATACTGATATCTTGGCAGCATTCCGAGTAACCTCCTCAACCTGGAGTTCCACCTGAAGAAGCAG  
GGGCCGCTGTAGCTGCCGAATCTTCTACAGGTACATGGACAACCTGTGTGGACCGATGGACTTACCAGTCTTGATCGTTAC  
AAAGGACGATGCTACCACATTGAGCCCGTTGCTGGAGAAGACAATCAATATATTTGTTATGTAGCCTATCCTTTAGACCT  
TTTTGAAGAAGGGTCTGTTACTAACATGTTTACTTCTATTGTAGGTAATGTTTTTGGGTTCAAAGCGCTGCGCGCTCTAC  
GTCTGGAGGATCTGCGAATTCCTACTTCTTATGTTAAAACCTTCCAAGGCCCGCCTCATGGCATCCAGGTTGAGAGAGAT  
AAATTGAACAAGTATGGTCCCTCCTTATTAGGATGTACCATTAACCAAAAATTTGGGATTATCTGCTAAGAACTACGGTAG  
AGCGGTTTTATGAATGTCTCCGTGGTGGACTTGATTTTACCAAGGATGATGAGAACGTGAACCTCTCAACCATTTATGCGTT  
GGAGAGACCGTTTTCTATTTTGTGCCGAAGCACTTTTTTAAAGCACAAGCTGAAACAGGTGAAATCAAA-----  
GGACATTACTTGAATGCTACTGCGGGTACATGCGAAGAAATGATGAAAAGGGCTGTATTTGCCAGAGAATTGGGAGTACC  
CATCGTAATGCACGACTATTTAACGGGGGGATTCACTGCAAATACTACCTTGGCCCATTTATTGCCGGGATAATGGTCTAC  
TTCTTACATCCACCGCGCAATGCATGCAGTTATTGATAGACAGAAGAATCATGGTATACATTTCC  
Nicotiana  
TCTAGGTTGGGGGGTAGGCCCTGGGGGAGAAGTTATAGACACCTTTCCATACTTTGTATCTGGAGTACTTCATTTAATTT  
CTTCTGCAGTATTGGGCTTTGGCGGCATTTATCATGCACTTCTGGGACCTGAGACACTTGAAGAATCTTTTCCCTTCTTT  
GGTTATGTCTGGAAAGATCGAAATAAAATGACCACAATTTTAGGTATTCATTAATCTTGTAGGTCTAGGTGCTTTTCT  
TCTAGTATTCAAGGCTCTTTATTTTGGGGCGTATATGATACCTGGGCTCCGGGAGGG---GGAGATG---

TAAGAAAAATTACCAACTTGACCCTTAGCCCGAGTATCATATTTGGTTATTTACTAAAATCCCCTTTTGGAGGGGAAGGA  
TGGATTGTTAGTGTGGACGATTTAGAAGATATAATCGGAGGACATGTATGGTTAGGTTCC---  
ATTTGTATACTTGGTGAATCTGGCATATCTTAACCAAACCCTTCGCATGGGCTCGACGCGCACTTGTATGGTCTGGAGA  
GGCTTACTTATCTTATAGTTTGGGGCTTTATCCGTCTTTGGTTTCATTGCTTGTGTTTTGTCTGGTTCAATAATACCG  
CTTATCCTAGTGAATTTTACGGACCTACTGGACCAGAAGCTTCTCAAGCTCAAGCATTACTTTTTCTAGTTAGAGACCAA  
CGTCTTGGGGCTAACGTGGGATCCGCTCAAGGACCTACTGGTTTAGGTAAATATCTAATGCGTTCCCCGACTGGAGAAGT  
CATTTTTGGAGGAGAACTATGCGTTTTTGGGATCTGCGTGCTCCATGGTTAGAGCCTCTAAGGGGTCCAAATGGGTTAG  
ACTTGAGTAGGTTGAAAAAAGACATACAA---  
CCTTGGCAGGAACGGCGTTCGCGAGAATATATGACTCATGCTCCTTTAGGTTCTTTAAATTCCGTGGGTGGTGTAGCTAC  
CGAGATCAATGCAGTCAATTATGTCTCTCCTAGAAGTTGGTTAGCTACCTCTCATTTTTGTTCTAGGATTCTTCTTCTTCG  
TAGGTCATTTGTGGCAGCGGGGAAGGGCTCGTGCAGCTGCAGCAGGATTTGAAAAAGGAATTGATCGTGACTTTGAACCT  
GTTCTTTTTCCATGACCCTCTTAAT-----  
ATGACTATAGCCCTTGGTAAGTTTACCAAAGACGAA-----  
AATGATTTATTTGATATTATGGATGACTGGTTACGGAGGGACCGTTTTCGTTTTTGTAGGCTGGTCCGGTCTATTGCTCTT  
TCCTTGTGCCTATTTGCTGTAGGGGGTGGTTACAGGTACAACCTTTGTAACCTTCATGGTATACCCATGGATTGGCCA  
GTTCTTATTTGGAAGGCTGCAATTTCTTAAGTCCGCGGTTTCTACTCCTGCTAATAGTTTACGACATTCGTTGTTGTTA  
CTATGGGGTCTGAAGCACAAGGAGATTTTACTCGTTGGTGTCAATTGGGGGTCTGTGGACTTTTGTGCTCTCCATGG  
AGCTTTTGGCCTAATAGGTTTTCATGTTACGTCAATTCGAGCTTGCTCGATCTGTTCAATTGAGACCTTATAATGCAATCG  
CATTCTCTGGTCCAATTGCTGTTTTTGTCTGTATTTCTGATTTATCCACTGGGTGAGTCTGGTTGGTTCTTTGCACCT  
AGTTTTGGTGTAGCAGCTATATTTTCGATTCATCCTCTTTTTTCAAGGGTTTATAATTGGACGTTGAACCCATTTTCATAT  
GATGGGAGTTGCCGGTGTATTGGGCGCTGCTTTGCTATGCGCCATTTCATGGTGTACCGTAGAAAATACTTTATTTGAAG  
ACGGTGATGGTGCAAATACATTCCGTGCTTTTAAACCAACTCAAGCCGAAGAACTTATTCAATGGTCACCGCTAACCGC  
TTTTGGTCCCAAATCTTTGGGGTTGCTTTTTCCAATAAACGTTGGTTACATTTCTTTATGTTATTTGTACCAGTAACCGG  
TTTATGGATGAGTGCTCTTGGAGTAGTCGGTCTAGCCCTGAACCTACGTGCCTATGACTTCGTTTTCTCAGGAAATTCGCG  
CAGCGGAAGATCCTGAATTTGAGACTTTCTACACCAAAAATATTCTCTTAAACGAAGGTATTTCGCGCTTGGATGGCGGCT  
CAAGATCAGCCTCATGAAAACCTTATATCCCTGAGGAGGTTCTACCACGTGGAAACGCTCTT---  
ATGTCTGGAAGCACAGGAGAACGTTTCGTTTGTGATATTATTACCAGTATTCGATACTGGGTTCATTATAGCATTACTAT  
ACCTTCCCTATTTCATTGCGGGTTGGTTATTTGTGAGCAGCGGTTTAGCTTACGATGTGTTTGGAAAGCCCTCGGCCAAACG  
AGTATTTTACAGAGAGCCGACAAGGAATTCATTAATAACTGGCCGTTTTGATCCTTTGGAACAACCTCGATGAATTTAGT  
AGATCGTTT---  
ATGACTATAGATCGAACCTATCCAATTTTTACAGTACGATGGTTGGCTGTTACGGCCTAGCTGTACCTACCGTCTTTTT  
TTTGGGATCAATATCAGCAATGCAGTTCATCCAACGA-----  
ATGGCTACACAACTGTTGAAAACAGT---TCT---AGATCTGGT-----  
CCAAGACGAAGTGCAGTAGGAGATTTATTAACCATTGAATTCGGAATATGGTAAAGTAGCTCCTGGGTGGGGAAGTAC  
TCCTTTGATGGGTGTGCAATGGCCTTATTTGCGGTATTTCTATCTATTATTTTGGAGATTTATAATTCTTCCGTTTTAT  
TGGATGGAATTTCAATGAAT-----  
ATGCTTACTCTCAAACCTCTTCGTTTACACAGTAGTGATATTTTTTGTCTCTCTTCATCTTTGGATTCCCTATCTAATGA  
TCCCGGACGTAATCCTGGA---CGTGAAGAA-----  
ATGGCCGATACTACTGGAAGGATTCCCTCTTTGGATAATAGGTACTGTAGCTGGTATTCTTGTAAATCGGTTTAAATAGGTAT  
TTTCTTTTATGGTTCATATTCGGATTGGGTTTCATCCCTC-----ATGCTT-----  
AATACCTTTAGTTTATCGGTATCTGTCTTAATTCGACCCTT---TTTTCG-----  
AGTAGTTTTTTCTTCGGCAAATTGCCCGAGGCCTATGCTTTTTTGAATCCAATCGTAGATATTATGCCAGTCATACCTCT  
GTTTTTTTTTCTTCTAGCCTTTGTTTGGCAAGCTGCTGTAAGTTTTCGA---ACGACACAATCA-----  
AACCCGAACGAACAAAATGTTGAATTGAATCGTACCAGTCTCTACTGGGGGTTATTACTCATTTTTGTACTTGGCTGTTTT  
ATTTTCCAATTTCTTCAAT---ATG---  
GAAGTAAATATTCTTGCAATTTATTGCTACTGCACATTTATTCTAGTTTCTACCGCTTTTCTACTTATCATTACGTAAA  
AACAGTCAGTCAAAAC-----GAT-----  
ATGGAACAGCAACCCTAGTCGCCATCTTTATATCTGGTTTACTTGTAAAGTTTTACTGGGTACGCCTTATATACCGCTTT  
TGGGCAA---CCTTCTCAACAACCTAAGAGATCCATTGAGGAACATGGAGAC---  
ATGGAAGCATTGGTTTATACATTCCTCTTAGTCTCGACTCTAGGGATAATTTTTTTCGCTATCTTTTTTTCGAGAACCGCC  
TAAAGTTCCA-----ACTAAAAAGAAC-----  
ATGACTCTTGCTTTCCAATTGGCTGTTTTTGCATTAATTGCTACTTCATTAATCTTATTGATTAGCGTACCCGTTGTATT  
TGCTTCTCCTGATGGCTGGTCAAGTAACAAAATGTTGTATTTTCTGGTACATCCTTATGGATTGGATTAGTCTTTCTGG  
TGGGTATCCTTAATTTCTCTCATCTCT---  
ATGTCACCACAAACAGAGACTAAAGCAAGTGTGGATTCAAAGCTGGTGTAAAGAGTACAAATTGACTTATTATACTCC  
TGAGTACCAAACCAAGGATACTGATATATTGGCAGCATTCCGAGTAACCTCCTCAACCTGGAGTTCCACCTGAAGAAGCAG  
GGGCCGCGGTAGCTGCCGAATCTTCTACTGGTACATGGACAACCTGTATGGACCGATGGACTTACCAGCCTTGATCGTTAC

AAAGGGCGATGCTACCGCATCGAGCGTGTGGTGGAGAAAAAGATCAATATATTGCTTATGTAGCTTACCCTTTAGACCT  
TTTTGAAGAAGGTTCTGTTACCAACATGTTTACTTCCATTGTAGGTAACGTATTTGGGTTCAAAGCCCTGCGCGCTCTAC  
GTCTGGAAGATCTGCGAATCCCTCCTGCTTATGTTAAACTTTCCAAGGTCCGCTCATGGGATCCAAGTTGAAAGAGAT  
AAATTGAACAAGTATGGTCGTCCCCTGTTGGGATGTACTATTAACCTAAATTGGGGTTATCTGCTAAAACTACGGTAG  
AGCCGTTTATGAATGTCTTCGCGGTGGACTTGATTTTACTAAAGATGATGAGAACGTGAACTCACAACCATTTATGCGTT  
GGAGAGATCGTTTTCTTATTTTGTGCCGAAGCACTTTATAAAGCACAGGCTGAAACAGGTGAAATCAAA-----  
GGGCATTACTTGAATGCTACTGCAGGTACATGCGAAGAAATGATCAAAAGAGCTGTATTTGCTAGAGAATTGGGCGTTCC  
GATCGTAATGCATGACTACTTAACGGGGGGATTACCAGCAATACTAGCTTGGCTCATTATTGCCGAGATAATGGTCTAC  
TTCTTCACATCCACCGTGCAATGCATGCGGTTATTGATAGACAGAAGAATCATGGTATCCACTTCC

Nuphar

TCTAGGTTGGGGGTTGGGTCCTGGCGGGGAAGTTGTAGACACCTTTCCATACTTTGTATCTGGAGTACTTCACTTAATTT  
CCTCCGCAGTCCTAGGCTTTGGCGGTATTTATCATGCGCTTCTTGGACCCGAGACTCTTGAAGAATCCTTTCCATTCTTC  
GGTTATGTATGGAAAGATAGAAAATAAAATGACCACAATTTTGGGTATTCACTTAATCTTGTAGGTCTAGGCGCTTTTCT  
CCTAGTGTTCAAGGCTCTTTATTTTGGGGCGTATATGATACCTGGGCCCTGGCGGG---GGAGATG---  
TAAGAAGAATTACCAACTTGACCCTTAGCCCAAGTATTATATTTGGTTATTTACTAAAGTCTCCCTTTGGGGGAGAAGGA  
TGGATTGTTAGTGTGGACGATTTAGAAGATATAATTGGAGGACATGTATGGTTAGGTTCC---  
ATTTGTATACTTGGTGGAACTTGGCATACTTAAACCAAACCCTTTGCGTGGGCTCGTCGCGCATTGTATGGTCTGGAGA  
AGCTTACTTGTCTTATAGTTTGGGGCTTTATCTGTCTTTGGTTTTCATTGCTTGTGTTTTCGTCTGGTTCAATAATACCG  
CTTATCCTAGTGAGTTTTACGGGCTACTGGGCCGAAGCTTCTCAAGCTCAAGCATTACTTTTCTAGTTAGAGACCAA  
CGTCTTGGAGCTAACGTGGGATCCGCTCAAGGACCTACTGGTTTAGGTAAATATCTAATGCGTTCCCCGACCGGAGAGAT  
TATTTTGGGGGAGAACTATGCGTTTTTGGGATCTCCGTGCTCCTTGGTTGGAACCCCTAAGGGGACCTAACGGTTTG  
ACTTGAGTAGGTTGAAAAAAGACATACAA---  
CCTTGGCAAGAACGACGTTCCGGCGGAATATATGACTCATGCTCCTTTAGGTTCTTTAAATCCCGTGGGTGGTGTAGCTAC  
AGAGATCAATGCAGTCAATTATGTCTCTCCTAGAAGTTGGTTAGCTACCTCTCATTTTGTTCTAGGATTCTTCTTTTTTG  
TGGGTCATTTGTGGCATGCGGGAAGGGCCCGTGCAGCTGCAGCAGGTTTTGAAAAGGAATCGATCGCGATTTTGAACCT  
GTTCTTTTTCATGACTCCTCTTAATTGA-----  
ATGACTATAGCCCTTGGTAGATTTACCAAAGAAGAA-----  
AATGATTTATTTGATATTTATGGATGACTGGCTACGGAGGGACCGTTTTCGTTTTTGTAGGTTGGTCCGGTCTATTGCTCTT  
TCCTTGTGCCTATTTTCGTTTGGAGGGTGGTTTACAGGTACAACCTTTGTAACCTTCATGGTATACCCATGGATTGGCTA  
GTTCTCTATTTGGAAGGCTGCAATTTCTAACCCTGCAGTTTCTACCCTGCTAATAGTTTACACATTCTTTATTGCTA  
CTATGGGGCCCGAAGCACAAGGAGATTTTACTCGTTGGTGCCAATTAGGCGGTCTGTGGACTTTTGTGCTCTCCACGG  
CGCTTTCGGACTAATAGGCTTCATGTTACGTCAATTCGAACCTTGTCTGATCTGTTCAATTGAGACCTTATAATGCAATCG  
CATTCTCTGCTCCAATTGCTGTTTTTGTTCGTTTCCGTTTCTGATTTATCCACTAGGTCAGTCTGGCTGGTTCTTTGCGCCT  
AGTTTTGGTGTAGCAGCTATATTTCCGTTTCATCCTTTTCTTCCAAGGGTTTATAATTGGACGTTGAACCCATTTATAT  
GATGGGAGTTGCTGGAGTATTGGGTGCTGCTCTGCTATGCGCTATTACGGTGCTACCGTAGAAAATACTTTATTTCGAAG  
ATGGTGACGGTGCAAATACATTCCGTGCCTTTAACCCAACTCAAGCTGAAGAGACCTATTTCGATGGTCACTGCTAACCGC  
TTTTGGTCACAAATCTTTGGGGTTGCTTTTTCCAATAAACGTTGGTTACATTTCTTTATGTTATTTGTACCAGTCACCGG  
TTTATGGATGAGTGTCTTTGGGGTAGTCGGTCTGGCTTTGAACCTACGTGCCTATGACTTCGTTTCCAGGAAATCCGTG  
CAGCAGAAGATCCTGAATTTGAGACTTTCTACACCAAAAATATTCTTTTAAACGAAGGTATTTCGTGCTTGGATGGCGGCT  
CAGGATCAGCCTCATGAAAACCTTATATTCCCTGAGGAGGTTCTACCCCGTGGAAACGCTCTT---  
ATGTCTGGAAGTACGGGAGAACGCGCTTTTGTGATATTATTACCAGTATTTCGATACTGGGTCATTTCATAGCATTACTAT  
ACCTTCCCTATTTCATTGCAGGTTGGTCAATTCGTGAGCAGGGTTTAGCTTACGATGTGTTTGGAAAGCCCTCGACCCAACG  
AATATTTACAGAAAGCAGACAAGGGATTCCGTTAATAACTGGCCGTTTTCGATTTCATTGGAACAACCTCGATGAATTTAGT  
CGATCCTT---  
ATGACCATAGATAGAACCTATCCAATTTTACAGTGAGATGGTTGGCTGTTTACGGACTAGCTGTACCTACCGTTTCTTT  
TTTGGGGTCAATATCAGCAATGCAGTTCATCCAACGA-----  
ATGGCTACACAAACCATTGAGGGTAGT---TCC---AGATCTGGG-----  
CCAAGACGAACCTATTATAGGCGATTTATTAATAACCATTGAATTCGGAATATGGTAAAGTAGCTCCTGGATGGGGAACCTAC  
ACCCTTTATGGGTGTCGCAATGGCTCTATTTGCAGTATTCTATCTATTATTTGGAGATTTATAACTCTTCTGTTTTAC  
TGGATGGGATTTTCAATTAAGT-----  
ATGCTTACTCTCAAACCTGTTTCGTTTATACGGTGGTGTATTTCTTTGTTTTCGCTCTTCATCTTCGGATTCTGTCTAATGA  
CCCAGGACGTAATCCTGGG---CGCGAGGAA-----  
ATGGCCGATACTACTGGAAGGATTCTCTTTGGCTGATAGGTAAGTACTGTAACCTGGTATTCTGTGATCGGTTTGTAGTGGGCGT  
TTTCTTCTACGGCTCATATTCCGGATTGGGATCATCCCTG-----ATGCCT-----  
AATATCTTTAGTTAATCTGTATCTGTCTTAATTCTGCCCTT---CAGCCG-----  
AGTGGTTTTTTCTTCGAAAATTGCCGAGGCTTATGCTTTTTTGAACCCAATCGTAGATGTTATGCCGGTCATACCTGT  
GCTCTTTTTTCTTCTTAGCCTTTGTGTGGCAAGCTGCTGTAAGTTTTTCA---ACGACACAATCA-----

AATCCGAACGAACAAAACGTTGAATTGAATCGTACCAGTCTCTACTGGGGGTTATTACTCATTNTTGTACTTGCTGTTTT  
ATTTTCCAATTATTTCTTCAAT---ATG---  
GAAGTAAATATACTCGCATTATTGCTACTGCGCTGTTTCATTCTAGTTCCTACTGCTTTTTTACTTATCATCTACGTAAA  
AACAGTCAGTCAAAAT-----GAT-----  
ATGGAAACTGCAACTCTAGTCGCCATCTCCATATCTGGTTTACTTGTAAAGCTTTACTGGGTATGCCTTATATACCGCCTT  
TGGGCAA---CCCTCTCAACAATAAGAGATCCGTTTTGAGGAACACGGGGAC---  
ATGGAAGCATTGGTTTATACATTCCTGCTGGTCTCGACTCTAGGGATAATTTTTTTTTGCTATCTTTTTTCGAGAACCGCC  
TAAGGTTCCG-----AATAAAAAGATGAAA---  
ATGACTATTGCTTTCCAATTGGCTGTTTTTGCATTAATTGCTACTTCATCAATCTTATTGATTAGTGTACCCGTTGTATT  
TGCTTCTCCCGAGGGTTGGTCAAGTAATAAAAAATGTTTTATTTCCGGTACGTCAATTATGGATTGGATTAGTATTTCTGG  
TAGGTATTCTTAATTCGCTCATCTAT---  
ATGTCACCAAAAACAGAAAATAAGCAAGTGTGGATTCAAAGCTGGTGTAAAGATTACAGATTGACTTATTACACTCC  
TGATTATGAAACCCTTGCTACTGATATCTTGGCAGCATTCCGAGTAACTCCTCAACCTGGAGTTCCGCTGAGGAAGCAG  
GAGCTGCGGTGGCTGCCGAATCTTCCACTGGTACATGGACAACCTGTGTGGACCGATGGACTTACCAGCCTCGATCGTTAC  
AAAGGACGATGCTACCACATCGAGCCAGTTTCTGGGGAGGAAAATCAATATATTGCTTATGTAGCTTACCCTTTGGACCT  
TTTTGAAGAAGGTTCTGTTACTAACATGTTTACTTCCATTGTGGGTAATGTATTTGGGTTCAAAGCCCTACGAGCTCTAC  
GTCTGGAGGATCTGAGAATTCCTCCTGCTTATTCTAAAACCTTCCAGGGCCACCTCATGGAATCCAAGTTGAGAGAGAT  
AAATTGAACAAGTATGGTTCGTCCTTATTGGGATGTACTATTAACCAAAAATTTGGGGTTATCCGCAAAGAACTATGGGAG  
AGCGGTTTTATGAGTGTCTCCGTGGTGGACTTGATTTTACCAAGGATGATGAGAACGTGAACCTCCAACCGTTTTATGCGTT  
GGAGAGACCGTTTTCTTATTTTGCGCCGAAGCTCTTTATAAAGCGCAGGCCGAAACAGGTGAAATTTAA-----  
GGACATTACTTGAATGCTACTGCAGGTACATCCGAAGAAATGCTCAAAGGGCGGCATGTGCCGAGAGTTGGGAGTTCC  
TATCGTAATGCATGACTACTTAACAGGGGGATTACCAGCAAATACTAGCTTGGCTCATTATTGCCGAGACAATGGCCTAC  
TTCTTACATCCACCGCGCAATGCATGCAGTTATTGATAGACAGAGGAATCATGGTATTCACTTCC

Nymphaea

TCTAGGTTGGGGGGTAGGTCCTGGTGGGGAAGTTGTAGACACCTTTCCATACTTTGTATCTGGAGTACTTCACTTAATTT  
CCTCCGCAGTCCTAGGCTTTGGCGGTATTTATCATGCGCTTCTTGGACCCGAGACTCTTGAGGAATCCTTTCCATTCTTC  
GGTTATGTATGGAAAGATAGAAAATAAAATGACCACAATTTGGGTATTCACTTAATCTTGTTAGGTCTAGGCGCTTTTCT  
TCTAGTGTCAAGCTCTTTATTTTGGGGCGATATGATACTTGGCCCCCTGGCGGT---GGAGATG---  
TAAGAAGAATTACCAACTTACCCTTAGCCCCAGTATTATATTTGGTTATTTACTAAAGTCTCCCTTTGGGGGAGAAGGC  
TGGATTGTTAGTGTGGACGATTTAGAAGATATAAATTGGAGGACATGTATGGTTAGGTTCC---  
ATTTGTATACTTGGTGGAACTTGGCATACTTAAACCAAACCCTTTGCGTGGGCTCGCCGTGCATTTGTATGGTCTGGAGA  
AGCTTACTTGTCTTATAGTTTGGGGCTTTATCCGTCTTTGGTTTCACTGCTTGTGTTTTCGTCTGGTTCAATAATACCG  
CTTATCCTAGTGAGTTTTACGGGCCTACTGGGCCGGAAGCTTCTCAAGCTCAAGCATTACTTTTCTAGTTAGAGACCAA  
CGTCTTGGGGCTAACGTGGGATCCGCTCAAGGACCTACTGGTTTAGGTAAATATCTAATGCGTTCCCCGACCGGAGAGAT  
TATTTTTGGGGGGAAACTATGCGTTTTTGGGATCTCCGTGCTCCCTGGTTGGAACCCCTAAGGGGACCTAACGGTTTTG  
ACTTGAGTAGGTTGAAAAAAGACATACAA---  
CCTTGGCAAGAACGACGTTCCGGCGGAATATATGACTCATGCTCCTTTAGGTTCTTTAAATTCGGTGGGTGGTGTAGCTAC  
AGAGATCAATGCAGTCAATTATGTCTCTCCTAGAAGTTGGTTAGCTACCTCTCATTTTGTTCTAGGATTCTTCTTTTTTG  
TGGGTCATTTGTGGCATGCGGGAAGGGCCCGTGCAGCTGCAGCAGTTTTGAAAAGGGATCGATCGCGATTTTGAACCT  
GTTCTTTTCATGACTCCTCTTAAT-----  
ATGACTATAGCCCTTGGTAGATTTACCAAAGAAGAA-----  
AATGATTTATTTGATATTATGGATGACTGGCTACGGAGAGACCGTTTTCGTTTTTGTAGGTTGGTCCGGTCTATTGCTCTT  
CCCTTGTGCCTATTTTCGCTTTAGGAGGGTGGTTCACAGGTACAACCTTTGTAACCTCATGGTATACCCATGGATTGGCTA  
GTTCTTATTTGGAAGGCTGCAATTTCTAACCCTGCAGTTTCTACCCCTGCTAATAGTTTAGCACATTCTTTATTGCTA  
CTATGGGGCCCGGAAGCACAAAGGAGATTTACTCGTTGGTGCCAATTAGGCGGTCTGTGGACTTTTGTGCTCTCCACGG  
CGCTTTCGGACTAATAGGCTTCATGTTACGTCAATTCGAACCTGCTCGATCTGTTCAATTGAGACCTTATAACGCAATCG  
CATTCTCTGGTCCAATTGCTGTTTTTGTTCCTGATTTTATCCACTAGGTCAGTCAGTCTGGCTGGTTCTTTGCGCCT  
AGTTTTGGTGTAGCAGCTATATTTCCGTTTCATCCTTTTTCTTCCAAGGGTTTATAAATTGGACATTGAACCCATTTCTAT  
GATGGGAGTTGCCGAGTATTGGGTGCTGCTCTGCTATGCGCTATTATGGTGCTACCGTAGAAAATACTTTATTTCGAGG  
ATGGTGACGGTGCAAATACATTCCGTGCCTTTAACCAACTCAAGCTGAAGAGACCTATTCTATGGTCACTGCTAACC  
TTTTGGTCAAAAATCTTTGGGGTTGCTTTTTCCAATAAACGTTGGTTACATTTCTTTATGTTATTTGTACCAGTACCCGG  
TTTATGGATGAGTGTCTTTGGGGTGGTCCGTCTGGCTTTGAACCTACGTGCCTATGACTTCGTTTTCCAGGAAATCCGTG  
CAGCAGAAGATCCTGAATTTGAGACTTTCTACACCAAAAATATTCTTTTAAACGAAGGATTTCTGCTTGGATGGCGCT  
CAGGATCAGCCTCATGAAAACCTTATATCCCTGAGGAGGTTTACCCCGTGGAAACGCTCTT---  
ATGTCTGGAAGTACGGGAGAACCGCTTTTTGCTGATATTATTACCAGTATTCGATACTGGGTCAATTCATAGCATTACTAT  
ACCTTCCCTATTCATTGCAGGTTGGTCATTTCGTGACGACGGTTTTAGCTTACGACGTGTTTGAAGCCCTCGACCCAACG  
AATATTTACAGAAAGCAGACAAGGGATTCCATTAATAACTGGCCGTTTTCGATTCAATTGGAACAACCTCGATGAATTTAGT

CGATCCTTT---  
ATGACCATAGATAGAACCTATCCAATTTTACAGTGAGATGGTTGGCTGTTACGGACTAGCTGTACCTACCGTTTTTTTT  
CTTGGGGTCAATATCAGCAATGCAGTTCATCCAACGA---  
ATGCATGGAATAGGATTTATGGCTACACAAACCATTGAGGGTAGT---TCC---AGATCTGGG-----  
CCAAGACGGACTATTGTAGGCGATTTATTAACCATTGAATTCGGAATATGGTAAAGTAGCCCCGGATGGGGAACTAC  
ACCCCTTATGGGTGTGCAATGGCTCTATTTGCAGTATTCCTATCTATTATTTTGGAGATTTATAATTTCTTCCGTTTTAC  
TAGATGGTATTTCAATTAAGT-----  
ATGCTTACTCTCAAACCTGTTTCGTTTATACGGTGGTGATATTCTTTGTTTCGCTCTTCATCTTCGGATTCTGTCTAATGA  
CCCAGGACGTAATCCTGGA---CGCGAAGAA-----  
ATGGCCGATACTACTGGAAGGATTCCTCTTTGGCTGATAGGTACTGTAACCTGGTATTCTTGTGATCGGTTTAATCGGCGT  
TTTTCTTACGGCTCATATTCGGGATTCGGGATCATCCCTG-----ATGCCT-----  
AATATCTTTAGTTAATCTGTATCTGTCTTAATTTCTGCCCTT---CAGCCG-----  
AGTGGTTTTTTCTTCGAAAATTGCCCGAGGCTTATGCTTTTTTGAACCCAATCGTGGATTTTTATGCCGGTCATACCTGT  
GCTCTTTTTTCTTTAGCCTTTGTGTGGCAAGCTGCTGTAAGTTTTTCGA---ACGACACAATCA-----  
AATCCGAACGAACAAACGTTGAATTGAATCGTACCAGTCTCTACTGGGGGTTATTACTCATTTTTTGTACTTGCTGTTTT  
ATTTTCCAATTATTTCTTCAAT---ATG---  
GAAGTAAATATACTCGCATTATTTGCTACTGCGCTGTTTATTCTAGTTTCTACTGCTTTTTTACTTATCATCTACGTAA  
AACAGTCAGTCAAAAT-----GAT-----  
ATGGAAACTGCAACTCTAGTCGCCATCTTCATATCTGGTTTACTTGTAAAGCTTTACGGGGTATGCCTTATATACCGCCTT  
TGGGCAA---CCCTCTCAACAATAAGAGATCCATTTGAGGAACACGGGGAC---  
ATGGAAGCATTGGTTTATACATTCCTGTTGGTCTCGACTCTGGGGATAATATTTTTTGTATCTTTTTTCGAGAACCGCC  
TAAGGTTCCG-----AATAAAAAGATGAAA---  
ATGACTATTGCTTTCCAATTGGCTGTTTTTGCATTAATTGCTACTTCATCAATCTTATTGATTAGTGTACCCGTTGTATT  
TGCTTCTCCCGATGGTTGGTCAAGTAAGAAAAATGTTGTATTTCCGGTACGTCAATTATGGATTGGATTAGTATTTCTGG  
TAGGTATTCTTAATTCGCTCATCTAT---  
ATGTCACCAAAAACAGAACTAAAGCAAGTGTGGATTCAAAGCTGGTGTAAAGATTACAGATTGACTTATTACACTCC  
TGAGTATGAAACCCCTTGCTACTGATATCTTGGCAGCATTCCGAGTAACTCCTCAACCTGGAGTTCCGCCTGAGGAAGCAG  
GAGCTGCGGTGGCTGCCGAATCTTCCACTGGTACTGGCAACTGTGTGGACCGATGGACTTACCAGCCTTGATCGTTAC  
AAAGGACGATGCTACCACATCGAGCCTGTTGCTGGGGAGGAAAAATCAATATATTGCTTATGTAGCTTACCCTTTGGACCT  
TTTTGAAGAAGGTTCTGTTACTAACATGTTTACTTCCATTGTGGGTAATGTATTTGGGTTCAAAGCCCTACGAGCTCTAC  
GTCTGGAGGATCTGAGAATTCCTCCTGCTTATTCTAAAACCTTTTCAGGGCCACCTCATGGAATCCAAGTTGAGAGAGAT  
AAATTGAACAAGTATGGTCGTCGCCCTATTGGGATGTACTATTAACCAAAAATTGGGGTTATCTGCAAAGAACTATGGGAG  
AGCGGTTTATGAGTGTCTCCGTGGTGGACTTGATTTTACCAAGGATGATGAAAACGTGAACTCCCAACCGTTTTATGCGTT  
GGAGAGACCGTTTTCTTATTTTGCGCCGAAGCTATTTATAAAGCGCAGGCCGAAACAGGTGAAATTA---  
GGACATTACTTGAATGCTACTGCGGGTACATCCGAAGAAATGATGAAAAGGGCGGTCTGTGCCCGAGAGTTGGGAGTTCC  
TATCGTAATGCATGACTACTTAACAGGGGGATTACCAGCAATACTAGCTTGGCTCATTATTGCCGAGACAATGGCCTAC  
TTCTTACATCCACCGCGCAATGCATGCAGTTATTGATAGACAGAGGAATCATGGTATTCACCTCC  
Oenothera  
TCTAGGTTGGGGAGTAGGTCCTGGTGGGGAAGTTATAGACACCTTTCCATACTTTGTATCTGGAGTACTTCACTTAATTT  
CCTCGGCAGTATTGGGCTTTGGCGGTATTTATCATGCACTTCTGGGCCCTGAGACTCTTGAAGAATCTTTTCCATTCTTT  
GGTTATGTATGGAAAGATAGAAATAAAATGACCACAATTTTAGGTATTCACCTAATCTTGTAGGTTTAGGTGCTTTTTCT  
TCTAGTATTCAAGGCTCTTTATTTTGGTGGCGTATATGATACCTGGGCTCCGGGAGGG---GGAGATG---  
TACGAAAAATTACTAACTTGACCCTTAGCCCAAGTATTCTATTTGGTTATTTACTAAAATCGCCCTTTGGCGGAGAAGGA  
TGGATTGTGAGTGTGGATGATTTGGAAGATATAATTGGAGGGCATGTATGGTTAGGGTTCC--  
ATTTGTATACTTGGCGGA-  
TCTGGCATATCTTAACCAAACCTTTTTCGTTGGGCTCGTCGCGCACTTGTATGGTCTGGGGAGGCTTACCTGTCTTATAGT  
TTAGCTGCTTTTATCCGTTTTTTGGTTTTTTCATTGCTTGTGCTTTGTCTGGTTCAATAATACCGCCTATCCTAGTGAATTTTA  
CGGACCGACTGGACCAGAAGCTTCTCAAGCTCAGGCATTTACTTTTCTAGTTAGAGACCAACGCCTTGGGGCTAACGTGG  
GATCCGCTCAAGGACCTACAGGTTTAGGTAATATCTAATGCGTTCCCGACTGGAGAAGTCATTTTTGGAGGGGAAACT  
ATGCGTTTTTGGGATCTGCGTGTCTCCCTGGTTAGAACCTCTAAGGGGGCCAAATGGGTTGGACTTGAGTAGGCTGAAAA  
AGACATACAG---  
CCTTGGCAAGAACGGCGTTCCGCAGAATATATGACTCATGCTCCTTTAGGTTCTTTAAATTCGGTTGGTGGCGTTGCTAC  
CGAGATCAATGCAGTCAATTATGTCTCTCCTAGAAGTTGGTTAGCTACCTCTCATTTTGTTCTAGGATTCTTCCCTATTCTG  
TAGGGCATTATGGCACGCGGGAAGGGCTCGTGCAGCTGCAGCAGGATTTGAAAAGGAATTGATCGTGATTTTGAACCT  
GCTCTTTCCATGACCCTCTTAAC-----  
ATGACTATAGCCCTTGGTAAATTTACCAAAGACGAA-----  
AAAGATTTATTTGATATTATGGATGACTGGTTACGTAGGGACCGTTTTGTTTTTGTAGGTTGGTCCGGTCTATTGCTCTT



TCCTTGTGCCTATTTTCGCTTTAGGGGGTTGGTTTACAGGTACAACCTTTGTAACCTTCATGGTATACCCATGGATTGGCCA  
GCTCCTATTTTGAAGGATGCAACTTCTTAACCGCCGAGTTTCGACCCCTGCTAATAGTTTTCAGCGCATTCTTTTGGTTGTTA  
CTATGGGGTCCGGAAGCGCAGGGGGATTTTACTCGTTGGTGTCAATTGGGCGGTCTGTGGACTTTTGTGCTCTCCACGG  
CGCTTTCGCACTAATAGGTTTTCATGTTACGTCAATTTGAAATTGCTCGATCTGTTCAATTGCGACCTTATAATGCAATCG  
CATTCTCTGGGCCAATTGCTGTTTTTGTCTGTATTCTGATTTATCCACTCGGGCAGTCTGGTTGGTTCTTTGCGCCT  
AGTTTTGGTGTAGCAGCTATATTTTCGCTTCATCCTCTTTTTTCCAAGGGTTTCATAATTGGACATTGAACCCGTTTCATAT  
GATGGGAATTGCTGGTGTATTGGGCGCTGCTCTACTATGTGCTATTTCATGGTGTACTGTAGAATATACTTTATTTGAAG  
ATGGTGTAGGTGCAAATACATTCCGTGCTTTTAAACCAACTCAAGCTGAAGAACTTATTCAATGGTCACCGCTAATCGC  
TTTTGGTCCCAAATCTTTGGGGTTGCTTTTTCCAATAAACGTTGGTTACATTTCTTTATGTTATTTGTACCAGTCACCGG  
TTTATGGATGAGTGTCTTTGGAGTCGTCCGCCTGGCTCTGAACCTACGCGCCTATGACTTCGTTTCCCAGGAGATCCGTG  
CCGCGGAAGATCTGAATTTGAAACTTTCTACACCAAAAAATTTCTCTTAAACGAAGGTATTCGTGCTTGGATGGCGGCT  
CAAGATCAGCCTCATGAAAACCTTATATTTCCCTGAGGAGGTTCTACCCCGTGGAAACGCTCTT---  
ATGTCTGGAAGCACAGGAGAACGTTCTTTTGGTGTATATTATTACCAGTATTCGATACTGGGTTATTTCATAGCATTACTAT  
ACCCTCCCTATTCATTGCGGTTTGGTTATTTCGTGAGCAGGGTTTACGTTACGATGTGTTTGGAAAGCCCTCGTCCAAACG  
AATATTTTACAGAGAGCCGACAAGGAATTCATTAATAACTGGCCGTTTTGACTCTTTGGAACAACCTCGACGAATTTAGT  
AGATCTTTT---  
ATGACTATAGATCGAACCTATCCAATTTTTACAGTGCATGGTTGGCTGTTTCATGGACTAGCTGTACCTACCGTTTCTTT  
TTTGGGGTCAATATCAGCAATGCAGTTCATCCAACGA-----  
ATGGCTACACAAACTGCTGAGGAGAGT---TCT---AGAGCTAGA-----  
CCAAAAAAACAGGTTTAGGGGGTTATTGAAACCATTAAATTCAGAATATGGTAAAGTAGCTCCTGGGTGGGGAACCTAC  
CCCTTTGATGGGTCTTGCAATGGCTCTATTTGCGGTATTCTTATCTATTATTTTGGAAATTTATAATTCTTCCGTTTTAT  
TGGACGGAATTTCAATGAAT-----  
ATGCTTACTCTCAAACCTTTGTTTACACAGTGGTGATATTCTTTGTTTCTCTCTTCATCTTCGGATTCCCTATCTAACGA  
TCCAGGACGTAATCCTGGA---CGTGAAGAA-----  
ATGGCCGATACTACTGGAAGGATTCTCTTTGGATAATAGGTACTGTAGCCGGTATTCTTGTGATCGGTTTAAATAGGTAT  
TTTCTTTTATGGTGCATACTCCGGGTTAGGCTCATCTCTG-----ATGCTT-----  
AATATCTTTAGTTTGTATCTGT-----CTTAATTCGATCTT---TATTCG-----  
AGTCGTTTTTCTTAGCCAAATTACCCGAGGCCTACGCTTTTTTGAATCCAATCGTAGATGTTATGCCAGTAATACCCCT  
TTTTCTTTTGTCTTAGCCTTTGTTTTGGCAAGTGTCTGTAAGTTTTTTCGA---ATGACACAATCA-----  
AACCCGAACGAACAAGATGTTGAATTGAATCGTACCAGTCTCTACTGGGGGTTATTACTCATTTTTTGTACTTGTGTTTT  
ATTTTCCAATTATTTCTTCAAT---ATG---  
GAAGTAAATATTCTCGCATTATTGCTACTGCACCTTTTTATTCTAGTTCCCTACTGCGTTTTTACTTATAATATACGTAAA  
AACTGTCAGTCAAAGT-----GAA-----  
ATGGAAACAGCAACCCTAGTCGCCATCTCTATATCTGGTTTACTTGTAAAGTTTTACGGGGTATGCCTTATATACTGCTTT  
TGGGCAA---CCCTCTCAACAATTAAGAGATCCGTTTCGAGGAACACGGGGAC---  
ATGGAAGCATTGGTTTATACATTCTCTTAGTCTCCACTCTAGGGATCATTTTTTTTCGCTATCTTTTTTTCGAGAACC GCC  
TAAAATTCAA-----  
ATGACTATTGCTTTCCAATTGGCTGTTTTTGCATTAATTGCTACTTCATCACTTTTACTGATTAGTGTACCCGTTGTATT  
TGCTTCTCCCGAGGGTTGGTCAAGTAACAAAAATGTTGTATTTCCGGCACATCATTGTGGATTGGATTAGTCTTTCTGG  
TGGGTATCCTTAATTCTCTCATCTCT---  
ATGTCACCACAAACAGAGACTAAAGCAAGTGTGGATTCAAAGCCGGCGTTAAAGATTATAAACTGACTTATTATACTCC  
TGAATACGAAACCAAAGATACTGATATCTTGGCAGCATTTCAGAGTAACTCCTCAACCTGGAGTTCGCGCTGAGGAAGCAG  
GGGCTGCAGTAGCTGCCGAATCTTCTACTGGTACCTGGACAACCTGTGTGGACCGATGGGCTTACCAGCCTTGATCGTTAT  
AAAGGAAGATGCTACCACATCGAGCCTGTTGCGGGAGAAGAGAATCAATATATATGTTATGTAGCTTACCCCTTAGACCT  
TTTTGAAGAGGGTTCTGTTACTAATATGTTTACTTCCATTGTGGGTAATGTATTTGGGTTCAAAGCCCTGCGTGCTCTAC  
GTCTGGAGGATCTGAGAATCCCTACTGCATATGTTAAAACCTTTCCAAGGCCCGCCTCACGGCATCCAAGTTGAGAGAGAT  
AAGTTGAACAAGTATGGCCGTTCCCTATTGGGATGTACCATTAAACC GAAATTAGGGTTATCCGCTAAGAACTACGGTAG  
AGCTGTTTTATGAATGTCTTCGTGGTGGACTTGATTTTACCAAGGATGATGAAAACGTAACCTCACAACCATTTATGCGTT  
GGAGAGACCGTTTTCTTATTTTGTGCCGAAGCAATTTATAAATCACAGGCTGAAACTGGTGAAATCAAA-----  
GGGCATTACTTGAATGCTACTGCGGGTACATGCGAAGAAATGATGAAAAGGGCTATATTTGCCAGAGAATTGGGAGTTCC  
CATCGTAATGCATGACTACTTAAACAGGGGGATTCACTGCAAATACTAGCTTGGCTCATTATTGCCGAGATAACGGTCTAC  
TTCTTACATCCACCGTGAATGCATGCAGTTATTGATAGACAGAAAAATCATGGTATACACTTTC

Oryza

TCTAGGTTGGGGAGTAGGGCCCGGGGAGAAGTTCTAGATACTTTCCGTACTTTGTATCTGGAGTACTTCATCTAATTT  
CCTCCGAGTCTTAGGCTTCGGTGGCATTATCACGCGCTTCTGGGACCGGAGACTCTTGAAGAATCTTTTCCATTCTTT  
GGTTATGTGTGGAAAGATAGAAATAAAATGACTACAATTTTGGGTATTCACCTAATTTTGTAGGTATAGGTGCTTTTCT  
TCTAGTACTCAAAGCTCTTTATTTTGGCGGTATATATGATACCTGGGCTCCTGGGGGA---GGAGATG---

TAAGAAAAATTACCAATTTGACCCTTAGCCCCGGTGTATATTTGGTTATTTACTAAAATCCCCTTTTGGGGGAGAGGGT  
TGGATTGTTAGTGTGGATGATTTAGAAGATATAATTGGGGGACATGTATGGTTGGGTTTC---  
ATTTGTGTATTTGGCGGAATTTGGCATATCTTAACCAAACCCTTCGCATGGGCTCGCCGTGCATTTGTATGGTCTGGAGA  
AGCTTACTTGTCTTATAGTTTLAGGCGCTTTATCTGTCTTTGGTTTTATCGCTTGTGTGTTTGTCTGGTTCAATAATACAG  
CTTATCCGAGTGAGTTTTATGGACCTACTGGGCCAGAAGCTTCTCAAGCTCAAGCATTACTTTTTCTAGTTAGAGATCAG  
CGTCTTGGAGCTAATGTGGGATCTGCCAAGGACCCACAGGTTTAGGTAAATATCTAATGCGTTCCCAACGGGAGAGGT  
TATTTTTGGAGGGGAAACTATGCGTTTTTGGGACCTTCGTGCTCCATGGTTAGAACCTCTAAGGGGCCCAACGGTTTGG  
ACTTGAGTAGGTTGAAAAAAGACATACAA---  
CCTTGGCAAGAACGACGTTTCGGCAGAATATATGACCCATGCTCCTTTAGGCTCTTTAAATTCTGTGGGTGGCGTAGCTAC  
CGAGATCAATGCAGTTAATTATGTTTCTCCTAGAAGTTGGTTAGCGACTTCCCATTTTGTCTAGGATTCCTCTTTTTTG  
TGGGCCAATTTGTGGCATTGCAGGAAGAGCCCGGGCTGCTGCAGCAGGATTTGAAAAGGGAATCGATCGTGATTTGGAGCCT  
GTTCTTTACATGACCCCTCTTAAC-----  
ATGACTATAGCCCTTGGTAGAGTTACTAAAGAAGAA-----  
AATGATTTATTTGATATTATGGACGACTGGTTACGAAGGGACCGTTTTGTTTTGTAGGATGGTCTGGCCTATTGCTTTT  
TCCTTGTGCTTATTTGCTTTTAGGAGGTTGGTTTACAGGGACAACTTTTGTAACCTTCTTGGTATACCCATGGATTGGCGA  
GTTCTTATTTGGAAGGTTGCAATTTCTTAACCGCAGCAGTTTCCACCCTGCCAATAGTTTAGCACACTCTTTGTTGCTA  
CTATGGGGCCCCGGAAGCACAAGGGGATTTACTCGTTGGTGTCAATTAGGTGGTCTGTGGACTTTTTGTTGCTCTCCATGG  
GGCTTTTGCCTAATAGGTTTTCATGTTACGTCAATTTGAACTTGCTCGGTCTGTTCAATTGCGGCCTTATAATGCAATTT  
CATTCTCTGGCCCAATCGCTGTTTTTGTTCGTTTCCGTTTCTGATTTATCCACTGGGGCAATCCGGTTGGTTCTTTGCGCCG  
AGTTTTGGCGTAGCAGCGATATTTTCGATTCATCCTCTTCTTCCAAGGATTTTATAATTGGACGTTGAACCCATTTTCATAT  
GATGGGAGTTGCCGGAGTATTAGGCGCGGCTCTGCTATGCGCTATTATGGGGCAACCGTGGAAAACACTCTATTTGAGG  
ACGGTGATGGTGCAAATACCTTCCGCGCTTTTAAACCAACTCAAGCTGAAGAACTTATTCAATGGTCACCGCTAATCGC  
TTTTGGTCCCAATCTTTGGTGTGCTTTTTCCAATAAACGTTGGTTACATTTCTTTATGCTATTTGTACCGGTCACCGG  
TTTATGGATGAGTGCTATTGGCGTAGTCGGCCTGGCTCTGAACCTACGTGCCTATGACTTCGTTTTCCAGGAAATCCGTG  
CAGCGGAAGATCCTGAATTTGAGACTTTCTACACCAAAAATATTCTTTTAAACGAGGGTATTTCGTGCGTGGATGGCAGCT  
CAGGATCAGCCTCATGAAAATCTTATATCCCTGAGGAGGTTCTACCACGTGGAAACGCTCTT---  
ATGTCTGGAAGCACGGGAGAACGTTCTTTTGTGCTGATATTATTACCAGTATTCGATACTGGGTTATTCATAGCATTACTAT  
ACCTTCCCTATTTCATTTGCGGGTTGGTTATTTGTGCTAGTACGGGTTTAGCTTATGACGTGTTTGGAAAGTCCCTCGGCCAAACG  
AGTATTTACAGAAAGCCGACAAGGAATTCGGTTAATAACCGACCGTTTTGATTCTTTAGAACAACCTCGATGAATTTAGT  
AGATCCTT---  
ATGACCATAGATCGAACCTATCCTATTTTTTACAGTGCATGGCTGGCTGTTTACGGACTAGCTGTACCTACTGTTTTTTTT  
CTTGGGATCAATATCAGCAATGCAGTTCATCCAACGA-----  
ATGGCTACACAAACCGTTGAAGATAGT---TCT---AGACCTGGA-----  
CCAAGACAAACTCGCGTAGGTAATTTATTGAAACCCTTGAATTCGGAATATGGGAAAGTAGCTCCGGGTTGGGGGACTAC  
TCCTTTTTATGGGGTTCGCAATGGCTTTATTTCGCGGTATTCTATCTATTATTTTAGAAAATTTATAATTTCTTCCGTTTTAC  
TGGACGGAATTTTAATGAAT-----  
ATGCTTACTCTCAAACCTTTTTGTTTTATACAGTAGTGATATTCTTTGTTTCCCTCTTTATCTTTGGATTCTTATCTAATGA  
TCCAGGACGTAATCCTGGG---CGTGACGAG-----  
ATGGCCGATACTACTGGAAGAATTCCTCTTTGGCTGATAGGTACTGTAACCGGTTATTGCTGTGATTGGTTTAATAGGTGT  
TTTTTTTTACGGTTCATATTCTGGATTGGGTTTCATCTTA-----ATGCCT-----  
AATATACTTAGTTAAACCTGTATTTGTTTTAATTTCTGTTATT---TATCCG-----  
ACTAGTTTTTTCTTCGCCAAATTGCCCGAAGCTTATGCCATTTTCAATCCAATCGTGGATTTTATGCCTGTCATACCTGT  
ACTTTTTTTCTATTAGCCTTTGTTTGGCAAGCTGCTGTAAGTTTTCGA---ATGACACAATCA-----  
AACCCGAATGAACAAAATGTTGAATTGAATCGTACCAGTCTATACTGGGGTTTATTACTCATTTTTTGTACTTGTGTTTT  
ATTTTCCAATTACTTCTTCAAT---ATG---  
GAAGTCAATATTCTCGCATTATTGCTACTGCATTGTTTCTAGTTTCTACTGCCTTTTTACTTATTATTTATGTAAA  
AACAGTCAGCCAAAAT-----GAT-----  
ATGGAACAGCAACTTTAGTCGCCATCTCCATATCTGGTTTACTTGTAAAGCTTTACTGGGTATGCCTTATATACCGCGTT  
TGGGCAA---CCCTCTCAACAATTAAGAGATCCATTGGAAGAACACGGGGAC---  
ATGGAAGCATTGGTTTATACGTTCTTTTAGTTTTCGACTTTAGGGATAATTTTTTTTTCGCTATCTTCTTCCGAGAACCACC  
TAAGGTTCCG-----  
ATGACTATTGCTTTCCAATTAGCTGTTTTTGCATTAATTGTGACTTCCCTCAGTCTTAGTCATTAGTGATACCCTTGTATT  
TGCTTCTCCTGATGGTTGGTCAAACAATAAAAACGTTGTATTTTCCGGTACATCATTATGGATTGGACTGGTCTTTCTGG  
TAGCTATTCTAAATTTCTCTCATTCT---  
ATGTCACCACAAACAGAACTAAAGCAAGTGTGGATTTAAAGCTGGTGTAAAGGATTATAAATTGACTTACTACACCCC  
GGAGTACGAAACCAAGGACTGATATCTTGGCAGCATTCCGAGTAACCTCAGCCGGGGGTTCCGCCCGAAGAAGCAG  
GGGCTGCAGTAGCTGCCGAATCTTCTACTGGTACATGACAACCTGTTTGGACTGATGGACTTACCAGTCTTGATCGTTAC

AAAGGCCGATGCTATCACATCGAGCCCGTTGTTGGGGAGGATAATCAATATATCGCTTATGTAGCTTATCCATTAGACCT  
ATTTGAAGAGGGTTCTGTTACTAACATGTTTACTTCCATTGTGGGTAACGTATTTGGTTTCAAAGCCCTACGCGCTCTAC  
GTCTGGAGGATCTGCGAATTTCCCCTACTTATTCAAAAACCTTTCCAAGGTCCGCTCATGGTATCCAAGTTGAAAGGGAT  
AAGTTGAACAAATACGGTTCGTCCTTTATTGGGATGTACTATTAACCAAATTTGGGATTATCTGCAAAAAATTATGGTAG  
AGCATGTTATGAGTGTCTACGCGGTGGACTTGATTTTACCAAAGATGATGAAAACGTAAACTCACAACCATTTATGCGTT  
GGAGGGACCGTTTTGTCTTTTGTGCCGAAGCTATTTATAAATCACAGGCCGAAACCGGTGAAATTAAG-----  
GGGCATTACTTGAATGCGACTGCAGGTACATGCGAAGAAATGATTAAGAGAGCTGTATTTGCGAGGGAATTAGGGGTTC  
TATTGTAATGCATGACTACTTAACCGGGGGGTTACCAGCAATACTAGTTTGGCTCATTATTGCCGCGACAACGGCCTAC  
TTCTTACATTCACCGAGCAATGCATGCAGTTATTGATAGACAGAAAAATCATGGTATGCATTTCC

Panax

TCTAGGTTGGGGGTAGGTCCTGGTGGGGAAGTTATAGACACTTTTCCATACTTTGTATCTGGAGTACTTCATTTAATTT  
CCTCTGCAGTATTGGGCTTTGGTGGTATTTATCATGCACTTCTAGGGCCTGAGACGCTTGAAGAATCTTTTCCATTCTTC  
GGTTATGTATGGAAAGATAGAAAATAAATGACTACAATTTTAGGTATTCACTTAATCTTATTAGGTATAGGTGCTTTTCT  
TCTAGTATTCAAGGCTCTTTATTTTGGTGGCGTATATGATACCTGGGCTCCGGGGGGG---GGAGATG---  
TAAGAAAAATTACCAACTTGACCCTTAGCCCAAGTATTATATTTGGTTATTTACTAAAATCGCCCTTTGGAGGGGAAGGA  
TGGATTGTTAGTGTAGATGATTTGGAAGATATAATCGGAGGACATGTATGGTTAGGTTCC---  
ATTTGTATACTTGGTGGAACTGCGCATATCTTAACCAAACCCTTCGCATGGGCTCGACGCGCACTTGTGTGGTCTGGGGA  
GGCTTACTTATCTTATAGTTTGGGGCTTTATCCGTCTTTGGTTTTCATTGCTTGTGTGTTTGTCTGGTTCAATAATACCG  
CCTATCCTAGCGAGTTTTACGGACCCACTGGACCAGAAGCTTCCAAGCTCAAGCATTACTTTTCTAGTTAGAGACCAA  
CGCCTTGGGGCTAACGTGGGATCCGCTCAAGGACCTACTGGTTTAGGTAAATATTTAATGCGTTCCCGACCGGAGAAGT  
CATTTTGGAGGAGAACTATGCGTTTTTGGGATCTGCGTGCCCTTGGTTAGAACCTCTAAGGGGTCCAATGGGTTGG  
ACTTGAGTAGGCTGAAAAAAGACATACAA---  
CCTTGGCAAGAACGGCGTTCTGCAGAATATATGACCCATGCTCCTTTAGGTTCTTTAAATTTCTGTGGGTGGCGTAGCTAC  
CGAGATCAATGCAGTCAATTATGTCTCTCCTAGAAGTTGGTTAGCTACTTCTCATTTTGTTCTAGGATTCTTCTTGTTCG  
TAGGTCATTTGTGGCACGCGGGAAGGGCTCGTGCAGCTGCAGCAGGGTTTGA AAAAGGAATTGATCGTGATTTTGAACCT  
GTTCTTTCCATGACCCCTCTTAAT-----  
ATGACTATAGCCCTTGGTAAATTTACCGAAGACGAA-----  
AAGGATTTATTTGATATATGGATGACTGGTTACGGAGGGACCGTTTTCGTTTTGTAGGTTGGTCCGGTTTTATTGCTCTT  
TCCTTGTGCCTATTTTCGCTTTAGGGGTTGGTTTACAGGTACAACCTTTGTAACCTTCATGGTATACCCATGGATTGGCCA  
GTTCTTATTTGGAAGGCTGCAATTTCTTAAGTCCGCGAGTTTCTACTCCTGCTAATAGTTTACACATTCTTTATTGTTA  
CTATGGGGTCTGAAGCACAAAGGGGATTTTACTCGTTGGTGTCAATTAGGCGGTCTGTGGACTTTTGTGCTCTCCATGG  
CGCTTTCCGACTAATAGGTTTTCATGTTACGTCAATTCGAACCTTGCTCGATCTGTTCAATTGCGACCTTATAATGCAATCG  
CATTCTCTGGTCCAATTGCTGTTTTTGTCTGTATTCTTGATTTATCCACTAGGTCAGTCTGGTTGGTTCTTTGCCCT  
AGTTTTGGTGTAGCAGCTATATTTTCGATTCATCCTCTTTTTTCAAGGATTTTATAATTGGACGTTAAACCCATTTTCATAT  
GATGGGAGTTGCCGGGTATTGGGCGCTGCTTTGCTATGCGCTATTTCATGGTGTACTGTAGAAAATCTTTATTTTGAAG  
ATGGTGATGGTGCAAATACATTCCGTGCTTTTAAACCAAACCTCAAGCTGAAGAACTTATTCAATGGTCACCGCTAACCGC  
TTTTGGTCCCAAATCTTTGGGGTTGCTTTTTCCAATAAACGTTGGTTACATTTCTTTATGTTATTTGTACCAGTAACCGG  
TTTATGGATGAGTGTCTTTGGAGTAGTCGGTCTGGCCCTGAACCTACGTGCCTATGACTTCGTTTCTCAGGAAATTCGTG  
CGGCGGAAGATCCTGAATTTGAGACTTTCTACACCAAAAATATTCTTAAACGAAGGTATTTCGTGCTTGGATGGCAGCT  
CAAGATCAGCCTCATGAAAACCTTATATTCCCTGAGGAGGTTCTACCCCGTGGAACGCTCTT---  
ATGTCTGGAAACACAGGAGAACGTTCTTTTGTGATATTATTACCAGTATTCGTTACTGGGTCATTCATAGCATTACTAT  
ACCTTCCCTATTCATTGCGGGTTGGTTATTTCGTGAGCACCAGTTTAGCTTACGATGTGTTTGGAAAGCCCTCGGCCAAACG  
AGTATTTACAGAGAACCGACAAGGAATTCATTAATAACTGGCCGTTTTGATCCTTTGGAACAACCTCGATGAATTTAGT  
AGATCTTTT---  
ATGACCATAGATCGAACCTATCCAATTTTTACAGTGCATGGTTGGCTGTTTACGGCCTAGCTGTACCTACCGTTTCTTT  
TTTGGGGTCAATATCAGCAATGCAGTTTCATCCAACGA-----  
ATGGCTACACAAACTGTTGAGAACGGT---TCT---AGATCTCGT-----  
CCAAAACCAACTACTGTAGGGAATTTATTGAAACCATTGAATTCGGAATATGGTAAAGTAGCTCCTGGATGGGGAACGAC  
TCCTTTGATGGGTGTCGCAATGGCCCTATTTGCGATATTTCTATCTATTATTTGGAGATTTATAATTTCTCCGTTTTAT  
TGGATGAAATTTCAATGAAT-----  
ATGCTTACTCTCAAACCTTTTTCGTTTACACAGTAGTGATATTCTTTGTTTCTCTCTTTATCTTTGGATTCCCTATCTAATGA  
TCCGGGGCGTAATCCTGGA---CGTGAAGAA-----  
ATGGCTGATACTACTGGAAGGATTCTCTTTGGATAATAGGTACTGTAGCTGGTATTCTTGTGATTGGTTTAAATAGGTAT  
TTTTTTTTATGGTTCATATTCCGGATTGGGTTTCATCCCTG-----ATGCTT-----  
AATATCTTTAGTTTGTATCTGTCTTAATTTCTGCCCTT---TATTCG-----  
AGTAGTCTTTTCTTCGCAAATTTGCCGAGGCCTATGCTTTTTTGAATCCAATCGTAGATCTTATGCCAGTCATACCTTT  
GTTCTTTTTTCTCTTAGCCTTTGTTTGGCAAGCTGCTGTAAGTTTTCGA---ATGACACAATCA-----

AACCCGAACGAACAAAATGTTGAATTGAATCGTACCAGCCTCTACTGGGGGTTATTACTCATTNTTGTACTTGCTGTTTT  
ATTTTCCAATTATTTCTTCAAT---ATG---  
GAAGTAAATATTCTTGCATTTATTGCTACTGCCTGTTTATTCTAGTTTCTACTGCTTTTCTGCTTATCATTACGTAAA  
AACAGAAAGTCAAAAATAAAAAG---AAT-----  
ATGGAAACAGCAACCCTAGTCGCCATCTTTATATCTGGTTTACTTGTAAAGTTTTACCGGGTACGCCTTATATACCGCTTT  
TGGGCAA---CCTTCTCAACAATAAGAGATCCATTTCGAGGAACATGGGGAC---  
ATGGAAGCATTGGTTTATACATTCCTCTTAGTCTCGACTCTAGGTATAATTTTTTTTTCGCTATCTTTTTTAGAGAACC  
TAAAGTTCCA-----ACTAAAAG-----  
ATGACTCTTGCTTTCCAATTAGCTGTTTTTGCATTAATTGCTACGTCATCAATCTTATTAATTGGCGTACCCGTTGTATT  
TGCTTCTCCTGATGGTTGGTCAAGTAACAAAAATGTTGTATTTCCGGTACATCATTATGGATTGGATTAGTCTTTCTGG  
TGGGTATCCTTAATTCTCTCATCTCT---  
ATGTCAACCAAAACAGAGACTAAAGCAAGTGTGGATTCAAAGCTGGTGTAAAGATTACAAATTGACTTATTATACTCC  
TGACTATGATCCCAAAGATACTGATATCTTGGCAGCATTCCGAGTAACTCCTCAACCTGGAGTTCCAGCTGAAGAAGCAG  
GGGCCGCGGTAGCTGCCGAATCTTCTACTGGTACATGGACAACCTGTGTGGACCGATGGACTTACTAGCCTTGATCGTTAC  
AAAGGGCGATGCTACAAAATAGAGCCCGTTGCTGGAGAAGAACTCAATTTATTGCTTATGTAGCTTACCCATTAGACCT  
TTTTGAAGAAGTTCTGTTACTAACATGTTTACTTCCATTGTAGGTAATGTATTTGGGTTCAAAGCCCTGCGTGCTCTAC  
GTCTGGAAGATCTGCGAATCCCTGTTGCTTATGTTAAACTTTCCAAGGCCCGCTCATGGCATCCAAGTTGAGAGAGAT  
AAATTGAACAAGTATGGTCTGCCCTGTTGGGATGTACTATTAACCTAAATTGGGGTTATCTGCTAAAACTACGGTAG  
AGCGGTTTTATGAATGTCTCCGGGGTGGACTTGATTTTACCAAAGACGATGAGAACGTGAACCTACAACCATTTATGCGTT  
GGAGAGATCGTTTCTTATTTTGTGCCGAAGCACTTTATAAAGCACAGGCTGAAACAGGTGAAATCAA-----  
GGGCATTACTTGAATGCTACTGCGGGTACATGCGAAGACATGATGAAAAGGGCTGTATTTGCCAGAGAATTGGGAGTTCC  
TATCGTAATGCATGATTACATAACAGGGGGATTACCAGCAAATACTACCTTGGCTCATTATTGCCGAGATAATGGCCTAC  
TTCTTACATCCACCGCGCAATGCATGCAGTTATTGATAGACAGAAGAATCATGGTATGCACCTTC

Pelargonium

TCTAGGTTGGGGAGTAGGTCCGGGCGGGGAAGTTATAGACACCTTTCCCTATTTTGTATCCGGAGTACTTCATTTAATTT  
CCTCCGCAGTATTGGGCTTTGGTGGTATTTATCATGCACTTCTTGGACCTGAGACTCTTGAAGAATCTTTTCCCTTCTTC  
GGTTATGTGTGGAAAGATAGAAAACAAAATGACCACAATTTGGGTATTCACTTAATCTTGTAGGTATAGGCGCTTTTCT  
TCTAGTATTCAAGGCTCTTTCTTTTGGGGTGTATATGATACTGGGCTCCAGGGGG---GGAGATG---  
TCAGAAAAATCACTAATTTGACCCCTTAGCCCAAGTGTCTATTTGGTTATTTACTAAAACTCCCCCTTTGGAGGAGAGGGC  
TGGATTGTTAGTGTAGACGATTTGGAAGATATAAATTGGAGGTCATGTATGGTTGGGTTCC---  
ATTTGTATACTTGGGGGAATCTGGCATACTTAAACCAAACCCTTTGCGTGGGCTCGTCTGCACTTGTATGGTCTGGCGA  
GGCTTACCTGTCTTATAGTTTGGTGTCTTATCTGTTTTTGGGTTCAATTGCTTGTGCTTTGTCTGGTTCAATAATACTG  
CTTATCCGAGCGAGTTCTACGGACCCACTGGGCCTGAAGCTTCTCAAGCTCAAGCATTACTTTTCTAGTTAGAGACCAA  
CGCCTTGGAGCTAACGTAGGATCTGCTCAAGGACCCACAGGTTTAGGTAAGTATCTAATGCGTTCCCCGACTGGAGAAGT  
CATTTTTGGAGGAGAACTATGCGTTTTTGGGATCTGCGCGCTCCGTGGTTAGAGCCTCTAAGGGTCTAATGGGTTGG  
ACTTGAGTAGGCTGAAAAAAGATATACAA---  
CCTTGGCAAGAACGACGTTCCGGCAGAATATATGACTCACGCTCCTCTAGGTTCTTTAAATTCGGTAGGTGGTGTAGCTAC  
CGAGATCAATGCAGTCAATTATGTCTCTCCTAGAAGTTGGTTAGCTACCTCTCATTTTGTTCTAGGATTCTTTCTGTTTCG  
TAGGTCATTTATGGCAGCTGGAAGGGCTCGTGCAGCTGCTGCAGGATTTGAAAAGGAATTGATCGTGATTTTGAACCT  
GTCCTTTCCATGACCCCTCTTAACTGA-----  
ATGACTATAGCCCTTGGTAAATTTACCAAAGAAGAA-----  
AATGATTTATTTGATATTATGGATGACTGGTTGCGGAGGGACCGTTTTCGTTTTTGTAGGTTGGTCCGGCCTATTGCTATT  
TCCTTGGCCTATTTTGGCTTTAGGAGGTTGGTTCACAGGGACAACCTTTGTAACCTCATGGTATACCCATGGATTGGCTA  
GTTCTATTTAGAAGGCTGCAATTTCTTAAACCGCTGCAGTTTCAACTCCTGCTAATAGTTTAGCGCATTCTTTGTTATTA  
CTATGGGGTCCCGAAGCACAAAGGAGATTTGACTCGTTGGTGCCAATTAGGCGGTCTGTGGACTTTTGTGCTCTCCACGG  
CGCTTTCGGACTAATAGGTTTTATGTTACGTCAATTTGAACCTGCTCGATCCGTTCAATTGCGACCTTATAATGCAATCG  
CATTTCTGCTTCAATTTGCTGTTTTTGTCTGATTTCTGATTTTATCCACTGGGTGAGTCTGGTTGGTTCTTTGCAACC  
AGTTTTGGTGTAGCAGCTATCTTTGATTCTACTCTTTTCCAAGGATTTATAAATTGGACATTGAACCCATTTATAT  
GATGGGAGTTGCCGGTGTATTGGGCGCTGCTTTACTATGCGCTATTATGGCGCTACCGTAGAAAATACTTTATTTGAAG  
ATGGTGTAGGTGCAAATACATTCCGTGCTTTTAAACCAACTCAAGCCGAAGAACTTATTCAATGGTCACCGCTAACC  
TTTTGGTCCCAAATTTTTGGGGTTGCTTTTTCAAATAAACGTTGGTTACATTTCTTTATGTTATTTGTACCAGTAACCGG  
TTTATGGATGAGTGTCTTGGAGTAGTCGGTCTGGCTCTGAACCTACGTGCCTATGATTTTTGTTTTCCAGGAAATCCGTG  
CGGCGGAAGATCCTGAATTTGAGACTTTCTACACCAAAAATATTCTTAAACGAAGGGATTTCGTGCTTGGATGGCGGCT  
CAAGATCAGCCTCATGAAAACCTTATATCCCTGAGGAGGTTCTACCCCGTGGAAACGCTCTTTAAATGTCTGGAAGCAC  
AGGAGAACGTTCTTTTGTGATATTATTACCAGTATTCGCTACTGGGTCATTATAGCATTACTATAACCCTCCCTATTCA  
TTGGGGTTGGTTATTCGTGAGCAGGGATTGGCTTATGATGTGTTTGAAGTCTCGTCCAAACGAGTATTTTACAGAA  
AGCCGACAAGGAATTCATTAATAACTGGCCGTTTTGATCCTTTGGAACAACCTCGACGAATTTAGTAGATCTTTTTAGAT

GACCATAGATCGAACCTATCCAATTTTTACAGTGCATGGTTGGCTGTTACGGACTAGCTGTACCTACCGTTTCTTTTT  
TGGGATCCATATCCGCAATGCAGTTCATCCAACGATAA-----  
ATGGCTACACAAAGCGTTGAGGATAGT---TCT---CGATCTGGT-----  
CCAAGAAGAATAATGTAGGGAGTTTATTGAAACCCCTTGAATTCGGAATATGGTAAAGTAGCTCCTGGATGGGGAACTAC  
TCCTTTGATGGGTGTCGCAATGGCTCTATTTGCGATATTCCTATCCATTATTTGGAGATTTATAATTCCTCCGTTTTAC  
TGGATGGAATTTTAATGAATTAG-----  
ATGCTTACTCTCAAACCTTTGTTTATACAGTAGTGATCTTTTTTGTCTCTCTTCATATTCGGATTTCTATCTAATGA  
TCCGGGGCGTAATCCTGGA---CGTGAAGAATAA---  
ATGGCCGATACTACTGGAAGGATTCCCTCTTTGGATAATAGGTACTGTAGCTGGTATTCTGTGATCGGTTTAATAGGCAT  
TTTTTTTTATGGTTCCTATTCGGGTTGGGTTTCATCTTGTA-----ATGATT-----  
AACATCTTTAGTTTTATCTGTATCTATCTTTCATTCTGCCCTT---TATTCG-----  
AGTAGTTTTTTCTTCGGCAAATTCGGGAAGCCTACGCTTTTTTGAATCCAATCGTAGATGTTATGCCAGTCATACCTCT  
TTTCTTTTTTCTCTTAGCCTTTGTTTGGCAAGCAGCAGTAAGTTTTTCGATGAACGACACAATCA-----  
AACCCGAACGAACAAAATGTTGAATTGAATCGTACCAGTCTTTACTGGGGGTTATTACTCATTTTTGTACTTGCTGTTTT  
ATTTTCCAATTATTTTTTCAATTAATG---  
GAAGTCAATATTCTCGCATTATTGCTACTGCATTGTTTATTCTAGTTTCTACCCTTTTTACTTATCATTACGTAAA  
AACGGTTGGTCAAAGC-----  
GATTCATTTGAATAAATGGAAACAGCAACCCTAGTCGCTATCTCTATATCTGGGTTACTTGTAAGTTTTACGGGATATGC  
CTTATATACTGCTTTTGGGCAA---  
CCCTCTCAACAATTAAGAGATCCATTTCGAGGAACACGGGGACTAGATGGAAGCATTGGTTTTATACATTCCTTTTAGTCTC  
GACTCTAGGGATCCTTTTTTCTCGATCTTTTTTTCGAGAACCCTAAAGTTCCA-----ACTCAAAA---TGA-  
--  
ATGACTATTGCTTTCCAATTGGCTGTTTTGCAATTAATTTCTACTTCATTAATCTTACTTATTGGTGTACCCGTTGTATT  
TGCTTCTCCTGAGGGTTGGTCAAGTAATAAAAATATTGTCTTTTCTGGTACATCGTTATGGATTGGATTAGTCTTTCTTG  
TGGGTATCCTGAATTCTCTCATCTCTTGAATGTCACCACAAACAGAGACGAAAGCAAGTGTGGATTTAAAGCAGGTGTT  
AAAGATTATAAATTGACTTATTATACTCCTGATTATGAAACCAAGGATACTGATATCTTGGCAGCATTCCGAGTCACTCC  
TCAACCTGGAGTTCACCTGAGGAAGCGGGGGCCGCGGTAGCTGCTGAATCCTCTACTGGTACATGGACAACCGTGTGGA  
CTGATGGGCTTACCAGCCTTGATCGTTACAAAGGACGCTGCTATCACATCGAGCCCGTTGCTGGGAGAAGAAAATCAATAT  
ATTGCTTATGTAGTTTACCCTTTAGATCTTTTTGAAGAAGTTCCGTTACTAATATGTTTACTCCATCGTGGGTAATGT  
ATTTGGGTTCAAAGCCCTTCGCGCTCTGCGTCTCGAGGATTTGCGAATCCCTACTGCTTATGTTAAAACGTTCCAAGGCC  
CGCCACATGGCATCCAAGTTGAGAGAGATAAATTGAACAAGTATGGACGTCCTTATTGGGATGTACTATTAACCTAAA  
TTGGGATTATCCGCTAAGAACTACGGTAGAGCGGTTTATGAATGTCTTCGTGGTGGACTTGATTTTACCAAAGATGATGA  
AAACGTGAACTCCAACCATTATGCGTTGGAGAGACCGTTTCTTATTTTGTACCGAAGCCCTTTATAAAGCGCAGACCG  
AAACAGGTGAAATCAAG-----  
GGGCATTACTTGAATGCTACTGCAGGTACATGTGAAGAAATGATCAAAAGGGCCGTGTTTGGCAGAGAGTTGGGGTTCC  
TATCGTAATGCATGACTACTTAACAGGGGGATTTACTGCAAATACTAGCTTAGCTCATTATTGCCGAGATAATGGTCTAC  
TTCTTACATCCATCGTGAATGCATGCAGTTATTGATAGACAGAAGAATCACGGTATACACTTT  
Phalaenopsis  
TCTAGGGTGGGGAGTAGGTCCGGGGGAGAAGTTATCGACACCTTTCCATACTTTGTATCTGGAGTACTCCACTTAATTT  
CCTCTGCAGTCTTAGGCTTTGGCGGTATTTATCATGCACTTCTAGGACCTGAAACTCTTGAAGAATCCTTTCCATTCTTC  
GGTTATGTATGGAAAGATAGAAATAAATGACTACAATTTTGGGTATTCACTTAATTTTATTAGGTATAGGTGCTTTTCT  
TCTAGTACTTAAGGCTCTGTATTTTGGAGGCGTATATGATACCTGGGCACCCGGAGGG---GGAGATG---  
TAAGAAAAATTACCAACTTGACCCTTAGCCCAAGCGTTATTTTTGGTTATTTACTAAAATCTCCTTTTGGGGGAGAAGGA  
TGGATTGTTAGTGTGGACGATTTAGAAGATATAATTGGAGGACATGTTTGGTTAGGTTCC---  
ATTTGTATACTTGGTGGAAATTTGGCATACTTAACCAAACCTTTTGCATGGGCTCGCCGTGCATTTGTATGGTCTGGAGA  
AGCTTATTTGTGCTATAGTTTAGGTGCTCTATCTGTCTTTGGTTTCATCGCTTGTGTTTTGTCTGGTTCAATAATACCG  
CTTATCCTAGTGAGTTTTACGGACCTACTGGGCCGGAAGCTTCTCAAGCTCAAGCATTACTTTTTCTAGTGAGAGACCAA  
CGTCTTGGGGCTAACGTGGGATCCGCCAAGGACCCACTGGGTTAGGTAAATATCTAATGCGTTTCTCCGACCGGAGAGGT  
TATTTTTGGGGGAGAAACTATGCGTTTTTGGGATCTTTCGTGCTCCCTGGTTAGAACCCTTAAGAGGTCCCAATGGCTTG  
ACTTGAGTAGGCTGAAAAAAGACATACAA---  
CCTTGGCAAGAACGACGTTTCGGCAGAATATATGACTCATGCTCCTTTGGGTTCTTTAAATTCGGTGGGTGGCGTAGCTAC  
CGAGATCAATGCAGTCAATTATGTCTCTCCTAGAAGTTGGTTAGCTACCTCTCATTTTGTTCTAGGATTTTTCTATTTG  
TGGGACATTTGTGGCATGCGGGAAGGGCACGTGCAGCTGCAGCGGGGTTTGA AAAAGGAATCGATCGTATTTGGAACCT  
GTTCTTTCCATGACCCCTCTTAGC-----  
ATGACTATAGCCTTTGGTAGATTTATCAAAGAAGAA-----  
AATGATTTATTTGATATTATGGATGATTGGTTACGGAGGGACCGTTTTCGTTTTTGTAGGTTGGTCCGGCCTATTGCTCTT  
TCCTTGTGCTTATTTTCGCTTTAGGGGTTGGTTACAGGTACAACTTTTGTAACCTTCATGGTATACCCATGGATTGGCTA

GTTCTATTTGGAAGGTTGTAATTTCTTAACGGCTGCGGTTTCTACTCCTGCAAATAGTTTGTAGCACATTCTTTGTTGCTA  
CTATGGGGTCTGAAGCACAAGGAGATTTTACTCGCTGGTGTCAATTAGGCGGTCTGTGGACTTTTGTGCTCTCCACGG  
TGCTTTTGGTCTAATAGGTTTTCATGTTACGTCAATTTGAACTTGCTCGTTCTGTTCAATTGCGACCTTATAATGCAATTG  
CATTTTCTGCTCCAATTGCTGTTTTTGTCTGTATTTCTGATTTATCCACTGGGTCAATCTGGTTGGTTTTTGCACCC  
AGTTTTGGTGTAGCAGCTATATTTTCGATTCATTCTTTTCTTCCAAGGGTTTTCATAATTGGACGTTGAACCCATTTTCATAT  
GATGGGAGTTGCTGGAGTCTTAGGCGCTGCTCTGCTATGTGCTATTCATGGCGCCACCGTAGAAAATACCTTATTCGAAG  
ATGGCGATGGTGCAAATACATTCCGTGCTTTTAAACCAACTCAAGCTGAAGAGACTTATTCAATGGTCACTGCTAACCGT  
TTTTGGTCCCAAATCTTTGGGGTTGCTTTTTCCAATAAACGTTGGTTACATTTCTTTATGCTATTTGTGCCAGTAACCGG  
TTTATGGATGAGTGCTATTGGGGTAGTTGGTCTCGCTCTGAACCTACGTGCCTATGACTTTGTTTTCCAAGAAAATTCGTG  
CAGCGGAAGATCCTGAATTTGAACTTTCTACACCAAAAAATATTCTCTTAAACGAAGGTATTCTGTGCTTGGATGGCGGT  
CAGGATCAGCCTCATGAAAACCTTATATTCCTGAGGAGTTCTACCCCGTGGAAACGCTCTT---

ATGCTCGAAGCAGGGAGAACGTTCTTTTGTGATATTACTAGTATTTCGATACTGGGTCACTCATAGCATTACTAT  
ACCTTCCCTATTTCATGCGGGTTGGTTATTTCGTGAGTACGGGTTTAGCTTACGATGTTTTTGGAAAGTCTCGGCCAAATG  
AATATTTACAGAGAGTCGACAAGGGATTCTTTAATAACTGGCCGTTTTGATTCTTTGGAACAACCTCGATAAATTTAGT  
AACCTTTT---

ATGACCATAGATCGAACTTATCCAATTTTTACAGTGCATGGTTGGCTGTTACGGACTGGCTGTACCTACTGTTTCTTT  
TTTAGGGTCAATATCAGCAATGCAGTTCATCCAACGA-----

ATGGCTACAAAAACCATTGAGAGTAGT---TCT---AGATCTGGG-----

CCAAGACGAAGTGGCGTAGGGAGTTTATTGAAACCATTGAATTCGGAATATGGAAAAGTAGCTCCAGGGTGGGGGACTAC  
ACCATTATGGGAGTTGCAATGGCTCTATTTGCAATATTTTTATCTATTATTTTAGAAAATTTATAATTCATCTGTTTTAC  
TGGATGGAATTTCAATTAAT-----

ATGCTTACTCTTAAACTATTGTTTTACACAGTAGTAATATTCTTTGTTTCTCTATTTCATCTTCGGATTCTTATCTAATGA  
TCCGGGGCGTAATCCTGGG---CGTGAAGAA-----

ATGACCGATACTACTGGAAGGATTCTCTTTGGCTGATAGGTACTTTAACTGGTATTCTTGTGATCGGTTTAAATAGGCAT  
TTTTTTTTACGGCTCCTATTCCGGGTTGGGTTTCATCTCTG-----ATGCTT-----

AATATCTTTTGTTTAATTTGTATCTGTCTTAATTCTACCCTT---TATTCG-----

AGTAGTTTTTTCTTCGCCAAATGCCCCGAGGCTTATGCCTTTTTTAATCCAATCATAGACGTTATGCCAATTATCCCTGT  
ACTCTTTTTTCTCTTAGCCTTTGTTTGGCAAGCTGCTGTAAGTTTTCCGA---ATGACACAATCA-----

AACCCGAATGAACAAAATGTTGAATTTGAATCGTACCAGTCTATACTGGGTTTTATTACTCATTTTTGTACTTGTGTTTT  
ATTTTCAAATTTATTTTCAAT---ATG---

GAAGTCAATATTCTTGCCTTTATTGCTACTGCGCTGTTTCATTTTTAGTTTCTACTGCCTTTTTACTTATCATATACGTCAA  
AACAGTCAGCCAAAAT-----GAT-----

ATGGAAACAGCAACCCTAGTCGCCATCTCCATATCCGGTTTACTTGTAAAGCTTTACTGGGTATGCCTTATATACCGCTTT  
TGGGCAA---CCCTCTCAAAAATTAAGAGATCCCTTCGAAGAACATGGGGAC---

ATGGAAGCATTGGTTTATACATTTCTTTTAGTTTCGACTTTAGGGATAATTTTTTTTTCGCTATCTTTTTTTCGAGAACCACC  
TAAAGTTCCA-----ACTAAAAAACAAAA---

ATGACTATTGCTTTCCAATTAGCTGTTTTTGCATTAATTGCAACTTCATTAATCTTACTGATTAGTGTACCCGTTGTATT  
TGCTTCTTCTGATGGTTGGTCAAGTAACAAAAATATTGTATTTTCTGGTACATCATTATGGATTGGATTAGTCTTTCTGG  
TAGCTATCCTTAATTCTCTAATCTCT---

ATGTCACCACAAACAGAACTAAAGCAAGTGTGGATTTAAAGCTGGTGTAAAGATTACAAATTGACTTATTATACTCC  
TGATTACGAAACCAAAGATACTGATATCTTGGCAGCATTCCGAGTAACCCCTCAACCGGGAGTTCCGCCTGAAGAAGCAG  
GGGCTGCGGTAGCTGCCGAATCTTCTACTGGTACATGGACAACCTGTGTGGACTGATGGACTTACCAGTCTTGATCGTTAC  
AAAGGACGATGCTACCACATCGAGGTGCTTGTGGGGAGGAAAATCAATATATTGCTTATGTAGCTTATCCTTTAGACCT  
TTTTGAAGAAGTTCTGTTACTAACATGTTTACTTCCATTGTGGGTAATGTATTTGGTTTCAAAGCCCTGCGAGCTCTAC  
GTCTGGAAGATCTGCGAATCCCCCTTCTTATTCAAAACTTTCCAAGGTCCGCCTCATGGCATCCAAGTTGAAAGAGAT  
AAATTGAACAAGTATGGTCTGCCCTATTGGGATGTACTATTAACCAAAATTTGGGATTATCTGCAAAAAACTACGGTAG  
AGCGGTTTATGAATGTCTAAGGGGTGGACTTGATTTTACTAAGGATGATGAAAACGTAAATTCACAACCATTATGCGTT  
GGAGAGATCGTTTCTTATTTTGTGCCGAAGCAATTTATAAAGCGCAAGCCGAAACAGGTGAAATTAATA-----

GGACATTACTTGAATGCAACTGCGGGTACCTGTGAAGAAATGATCAAAAAGAGCGGTATTCCGCCAGAGAATTGGGAGTTCC  
TATCGTAATGCATGACTACTTAACTGGGGGTTACCAGCAAATACTAGCTTGGCTCATTATTGCCGCGACAATGGTCTAC  
TTCTTACATCCATCGCGCAATGCATGCAGTTATTGATAGACAGAAAAATCATGGTATGCATTTTC

Pinus

TCTAGGATGGGGAGTCGGTCTGGTGGGGAAATCGTGGACACTTTTCCATATTTTGTATCTGGGGTACTTCACTTAATTT  
CTTCTGCGGTTTTAGGTTTTGGTGGTATTTATCATGCACTCATAGGACCCGAAACTTTAGAAGAATCTTTTCCATTCTTT  
GGCTATGTATGGAAAGATAGAAAACAAAATGACCACAATTTTGGGTATTCACCTAATCTTGTAGGTGTTGGTGTCTTTCT  
TCCAGTGCTAAAAGCTTTGTATTTTGGAGGTGTATATGATACTTGGGCTCCCGCGGT---GGAGATG---

TAAGAAAAATTACGAACCCGACACTTAAACCAAGTGTATATTTGGTTATTTACTGAAATCTCTTTTCGGAGGAGAAGGA

TGGATCGTTAGCGTGGACAATCTAGAAGATGTAATTGGAGGACATGTATGGTTAGGTTCC---  
ATTTGTATCTTCGGTGGTATCTGGCATACTTAACCAAACCTTTTGCATGGGCTCGCCGTGCATTTCGTATGGTCCGGAGA  
AGCTTATTTGTCCTATAGTTTAGCGGCTCTATCCCTCTTTGGTTTTATTGCTTGTGTTTTGTTTGGTTCAACAATACCG  
TTTATCCCAGTGAATTTTATGGGCCACCAGGCCCAGAAGCCTCTCAAGCTCAAGCGTTTACTTTTTTAGTTAGAGACCAA  
CGTCTTGGAGCTAGTGTGGGGTCTGCCAAGGACCTACTGGTTTAGGTAAATACCTTATGCGTTCTCCGACTGGAGAAAT  
TATCTTTGGAGGGGAAACGATGCGTTTTTGGGATCTCCGTGCTCCTTGGTTGGAACCCCTAAGGGGCCCTAATGGTTTGG  
ATCTGAGCAAGTTGAGAAAAGACATACAG---  
CCTTGGCAGGAACGACGTTTCAGCAGAATATATGACTCATGCTCCTTTAGGTTCTTTAAATTCTGTGGGTGGTGTAGCTAC  
CGAAATCAATGCGGTGAATTATGTCTCTCCCCGAAGTTGGTTATCCACCTCCCATTTCGTTCTAGGATTTTTCTTCTTCG  
TAGGTCATTTGTGGCATGCGGGAAGGGCTCGTGCAGCTGCAGCAGGATTTGAGAAAGGGATTGATCGTGATTTTCGAACCT  
GTCTTTCCATGACTCCTCTTAAC-----  
ATGACTATAGCCCTTGGAAAGTCTTCTAAAGAAGAA-----  
AAAACCTTTATTTGATACTGTGGATGACTGGCTACGCAGAGACCCTTTCGTTTTTGGGGTGGTCCGGTCTATTGCTCTT  
TCCTTGTGCCTATTTTGCCTTAGGTGGATGGTTCACGGGTACAACCTTTGTGACTTCATGGTATACTCACGGATTGGCCA  
GTTCTATCTGGAAGTTGTAATTTCTAACTGCCGCAGTTTCTACTCCTGCTAATAGTTTAGCACATTCTTTGCTGCTA  
TTATGGGGTCCCGAAGCACAAGGAGATTTGACTCGTTGGTGTCAATTAGGTGGTCTATGGACCTTCGTTGCTCTTCACGG  
TGCTTTCCGTCTAATAGTTTTCATGTTACGTCAATTTGAACTTGCTCGATCTGTACAATTGCGACCTTATAATGCAATTG  
CATTCTCTGCTCCAATTGCTGTCTTTGTTTCTGTATTTTTGATCTATCCATTGGGACAGTCCGGTTGGTTTTTCGCACCT  
AGTTTTGGTGTAGCAGCTATTTTCCGTTTTATCCTCTTCTTTCAAGGTTTTATAATTGGACCTTGAATCCATTTTCATAT  
GATGGGAGTTGCCGGAGTATTGGGTGCTGCTCTTCTATGCGCTATTTCATGGTGTACCGTGGAAAATACTTTATTTGAAG  
ATGGTGATGGTGCAAATACGTTCCGTGCTTTTAAACCCGACTCAAGCCGAAGAGACTTATTCCATGGTCACTGCTAACC  
TTCTGGTCCCAGATTTTTGGGGTTGCTTTTTCCAATAAACGTTGGTTACATTTCTTCATGTTATTTGTGCCAGTGACCGG  
TTTATGGATGAGTGCCATTGGAGTAGTTGGTCTAGCTCTAAACTTACGTGCCTATGATTTTGTTCACAGGAGATCCGTG  
CAGCAGAAGATCCTGAATCTGAGACTTTCTACACAAAAAATATTCTCCTGAACGAAGGTATTTCGTGCTTGGATGGCGGCT  
CAAGATCAGCCTCATGAAAACCTTATATTCCCTGAGGAGGTCTACCCCGTGGAAACGCTCTT---  
ATGTCTGGGAATACGGGAGAACGCTCCTTTGCTGACATTATTACTAGTATTAGATACTGGGTTATCCATAGCATTACCAT  
ACCTTCTCTATTTCAGGTTGGTTATTTGTAAGCACGGTTGGCTTATGATGTGTTCCGGGAGCCCCGGCCAAATG  
AGTATTTACAGAAAGTCGACAAGAGGTTCCATTAGTAACGGCCGTTTCGATCCGTTAGAGCAACTCGATGAATTTACT  
AGATCTTTT---  
ATGACTATAGATAGAACTTATCCAATTTTTACAGTTAGATGGTTGGCCGTTTCACGGGCTAGCTATCCCTACAGTTTTTTT  
CTTGGGATCAATATCGGCAATGCAGTTCATCCAACGA-----  
ATGGCTACACAGACCATTGATGATACT---TCC---AAAACCACG-----  
CCAAAAGAAACCCTTGTAGGAACGACCTTAAACCGCTTAATTCAGAATATGGTAAAGTAGCTCCTGGATGGGGAACCTAC  
TCCTCTTATGGGTTTTGCAATGGCTCTATTTGCAGTATTCTATCTATTATCTTGGAGATTTATAATTCTTCCGTTTTAT  
TGGATGGGATTCCGGTTAGTTGGGGC-----  
ATGCTTACTCTTAAGCTGTTTCGTTTACGCAGTAGTGGTATTTTTCATTTCTCTTTTTATCTTTGGATTTCTATCGAACGA  
TCCAGGACGTAATCCCGGA---CGTAAAGAA-----  
ATGGCCGATACCCTGGAAGGATCCCTCTTTGGTTGATAGGTACTGTAACCTGGTATTATCGTGATTGGTCTACTGGGTGT  
CTTTTTCTATGGTTCATATTCCGGATTAGGGTCATCCCTA-----ATGCCAGTTATGTTCAATATTTTT---  
-----CTAGATGATGCCTTTATTCACTCA-----  
AATAATCCCTTTTTTGGAAAATTACCTGAGGCTTATGCAATTTCTGATCCAATTGTCGATGTAATGCCAATTATTCTCTGT  
TCTCTCTTTTCTCTTAGCCTTTGTTTGGCAAGCTGCTGTAAGTTTTCGA---ATGACACGACCG-----  
AACCCGAACGACCAAAATGTTGAATTGAATCGTACCAGTCTCTACTGGGGGTTGCTACTAATTTTTGTACTTGCTGTTCC  
ATTCTCCAATTATTTTTTCAAT---ATG---  
GAAGTAAATACCCTTGCATTTATTGCTGTTCTACTGTTCCCTTGCAGTTCCTACTGCTTTTCTACTTATCCCTTACGTCAA  
AACGGCCAGTGAAGCAGTGAAGCAAT-----  
ATGGAACTGCAACCTTAGTCACCATCTCCATATCTTGTTTACTTGTAAAGCTTTACTGGTTATGCCCTATACACCGCCTT  
TGGGCAA---CCCTCTAAACAACCTTAGGATCCTTTTTGAGGATCACGAGGAC---  
ATGGAAGCATTGGTTTATACATTCTGTTGGTATCGACCCTAGGGATAATCTTTTTCGCTATTTTTCTTCCGAGAACCACC  
CAAACCTCCG-----  
ATGACTATTGCTTTCCAATCGGCTGTGTTGCATTAATTGCTATTTTACTAGTGATTGGTGTACCTGTTGCACT  
TGCCTCTCCCGATGGTTGGTCAAGTAGCAAAAATGTTGTATTTTGGGGTGTATCATTATGGATCGGATCAGTCCTTTTTG  
TAGGTATCCTTAATTCTTTTCATATCT---  
ATGTCACCAAAAACAGAGACTAAAGCTAGTGTCCGATTCAAAGCTGGTGTAAAGATTACAGATTAACCTTATTATACTCC  
TGAATATCAGACCAAAGATACAGATATCTTGGCAGCATTCCGAGTAACTCCTCAACCCGGGGTGCACCTGAAGAAGCGG  
GAGCAGCAGTAGCTGCTGAATCTTCCACCGGTACATGGACCCTGTTTGGACCGATGGACTTACTAGTCTCGATCGTTAC  
AAGGGCGATGCTATGACATCGAGCCCCTTCTGGAGAGGAGACTCAATTTATTGCCTATGTAGCTTACCCCTTAGACCT

TTTCGAAGAAGGTTCTGTTACTAACTTGTTCACCTCCATTGTAGGTAATGTATTTGGATTCAAGGCCTTACGGGCTCTAC  
GTTTGGGAAGATTTGCGGATTCCCCCTTCTTATTCCAAAACCTTTTCAGGGTCCACCTCATGGTATCCAAGTTGAAAGAGAT  
AAATTGAACAAATATGGTCGTCTTTTATTGGGATGTACTATCAAACCAAATTTGGGTCTATCAGCCAAAAACTATGGTAG  
AGCAGTTTACGAATGTCTCCGTGGTGGACTCGATTTTACTAAGGATGATGAGAACGTAAATTTCCCAACCATTTCATGCGCT  
GGAGAGATCGTTTTGTCTTTTGTGCGGAAGCCCTTAATAAGGCTCAGGCTGAGACGGGTGAAATTAAG-----  
GGACATTATTTGAATGCTACTGCAGGTACATGTGAAGAAATGATGAAAAGGGCAATATTTGCAAGAGAATTGGGAGTTCC  
TATCGTTATGCATGACTACCTGACGGGAGGTTTTACCGCCAAATACTTCTTTGGCTCATTATTGCCGAGACAACGGCCTAC  
TTCTTACATTACCCGCGCATGCATGCAGTTATTGACAGACAAAGAAATCATGGTATGCATTTC

Piper

TCTAGGTTGGGGCGTAGGCCCGGGTGGGGAAGTTATCGACACCTTTCCATACTTTGTATCTGGAGTACTTCACTTAATTT  
CTTCCGCAGTCTTAGGCTTTGGTGGTATTTACCATGCACTTCTAGGACCTGAGACTCTGGAAGAATCTTTTCCATTCTTC  
GGTTATGTATGGAAGATAGAAAATAAATGACCACCTTTTGGGTATTCCTTAATTTTGTAGGTATAGGTGCATTTCT  
TCTAGTATTTAAAGCTCTTTATTTTGGAGGCGTATATGACACCTGGGCTCCCGGGGA---GGAGATG---  
TAAGAAAAATTACCAACCTGACCCTTAGCCCAAGTGTTATATTTGGTTATTTACTAAAATCTCCCTTTGGAGGGGAGGGT  
TGGATTGTTAGTGTAGACGACTTAGAAGATATAATTGGGGGACATGTATGGTTAGGTTCC---  
ATTTGTATACTTGGTGGGATCTGGCATACTTAAACCAAACCCTTTGCATGGGCTCGTCGAGCATTGTATGGTCTGGGGA  
GGCTTACTTGTCTTATAGTTTGGTGTCTTGGCTATCTTTGGTTTTCGTCGCTTGTGCTTTGTATGGTTCAATAATACCG  
CCTACCCTAGTGAGTTTTATGGTCTACTGGCCAGAAGCTTCTCAAGCTCAAGCATTACCTTTCTAGTTAGAGACCAG  
CGTCTTGGGGCTAACGTAGGGTCTGCTCAAGGGCCACTGGTTTAGGTAAATATTTAATGCGTTCCCAACGGGAGAGGT  
TATTTTGGAGGAGAACTATGCGTTTTTGGGATCTCCGTGCTCCTTGGTTGGAACCTTTAAGAGGGCCCAATGGTTGG  
ACTTGGGTAGGCTGAAAAAGGACATACAA---  
CCTTGGCAAGAACGACGTTCCGCAGAGTATATGACTCATGCTCCTTTAGGTTCTTTAAATTCGGTAGGGGGCGTAGCTAC  
CGAGATCAATGCAGTCAATTATGTCTCTCCTAGAAGTTGGTTAGCTACCTCTCATTTTGTTCTAGGATTCTTCTTTTTTCG  
TGGGCCACTTATGGCATGCGGGAAGGGCCCGTGCAGCTGGATTTGAAAAGGAATCGATCGCGATTTTGAACCC  
GTTCTTTCCATGACCCCTCTTAAC-----  
ATGACTATAGCCCTTGGTAGATTTACCAAAGAAGAAGAA---  
AAGGATTTATTTGATATTTATGGATGACTGGTTACGAAGGGACCGTTTTCGTTTTTGTAGGTTGGTCTGGTTTTATTGCTCTT  
TCCTTGTGCTTATTTTCGTTTTAGGGGGTGGTTTACAGAGTACAACCTTTGTAACCTTCATGGTATACCCATGGGTTGGCGA  
GTTCTTATTTGGAAGGCTGTAATTTCTTAACCGCTGCAGTTTCTACTCCTGCTAATAGTTTACACACTCCTTATTGTTA  
CTATGGGGCCCTGAGGCGCAGGGAGATTTTACCCTGGTGTCAATTAGGCGGTTTTGTGGACTTTTTGTTGCTCTTCATGG  
TGCTTTTCGCACTAATTGGTTTTCATGTTACGTCAATTCGAACCTTGTCTGATCTGTTCAATTGCGACCTTATAATGCAATCG  
CATTCTCTGGCCCAATTGCGGTTTTTGTCTGTATTCTTGATTTATCCACTAGGCCAGTCTGGTTGGTTCTTTGCACCT  
AGTTTTGGAGTTGCTGCTATATTTTCGATTCATCCTCTTTTTTCCAAGGGTTTCATAATTGGACCTTGAACCCATTTTCATAT  
GATGGGAGTTGCCGGAGTATTGGGCGCTGCTCTACTATGCGCTATTCATGGTGCTACCGTCGAAAATACTTTATTTCGAAG  
ATGGTGATGGTGCAAATACATTCCGTGCTTTTTAACCAACTCAAGCCGAAGAGACTTATTCAATGGTCACTGCTAACCGC  
TTTTGGTCTCAAATTTTTGGGGTTGCTTTTTCCAATAAACGTTGGTTACATTTCTTTATGTTATTTGTACCAGTAACCGG  
TTTATGGATGAGCGCTCTTGGAGTAGTCGGTTTTGGCTCTGAATCTACGTGCCTATGACTTTGTTTCCAGGAAATTCGTG  
CAGCGGAAGATCCTGAATTTGAGACTTTTTACACCAAAAATATTCTTTTAAATGAAGGTATTCGTGCTTGGATGGCGGCT  
CAGGATCAGCCTCATGAAAACCTTGTATTCCCTGAGGAGGTTTACCCCGTGGAAACGCTCTT---  
ATGTCTGGAAGCACGGGAGAACGTTCTTTTGTGATATTATTACCAGTATTCGATACTGGGTCATTTCATAGTATTACTAT  
ACCTTCCCTATTCATTGCAGGTTGGTTATTTGTGAGCAGGGTTTTAGCTTACGATGTGTTTGGAAAGTCTTCGGCCAAACG  
AGTATTTTACAGAGAGCCGGCAAGGGATTCCATTAATAACTGGCCGTTTTGATCCTTTGGAACAACCTCGATGAATTTAGT  
AGATCCTTT---  
ATGACCATAGATCGAACCTATCCAATTTTTACAGTGCAGTGGTTGGCTGTTTACGGACTAGCTGTACCTACCGTTTTCTTT  
TTTGGGCTCAATATCAGCAATGCAGTTCATCCAACGA-----  
ATGGCTACACAAACCGTTGAGGATAGT---TCC---AAATCTGGG-----  
CCAAGACGAACCTGTTATAGGGGATTTATTGAAACCTTTGAATTCGGAATATGGTAAAGTAGCCCTGGGTGGGGAACGAC  
CCCCTTGATGGGGTTCGCAATGGCCTTATTTGCGATATTCTTATCCATTATTTGGAGATTTACAATTCTTCCGTTTTAC  
TGGATGGAATTTTAGTCAGT-----  
ATGCTTACTCTCAAACCTCTCGTTTACACAGTAGTGATATTCTTTGTTTCTCTCTTCATCTTCGGATTCCCTATCTAATGA  
TCCAGGACGTAATCCTGGG---CGTGAGGAC-----  
ATGGCTGATACTACTGGAAGGATTCTCTTTGGCTGATAGGTACTGTAACCGGTATTATTGTGATTGGTTTAATTGGTAT  
TTTCTTTTACGGCTCATATTCTGGATTGGGCTCATCCCTA-----ATGCTT-----  
AATATCTTTAGTTTGTATCTGT-----CTTAGTTCTGCCCTT---CATTG-----  
AGTAGCTTTTTCTTCGCAAAATTGCCGGAAGCTTATGCCCTTTTCAATCCAATCGTGGATGTTATGCCAGTGATACCTGT  
GCTCTTTTTTCTTCTTAGCCCTTGTGGCAAGCTGCTGTAAGTTTTTCGA---ACGACACAATCA-----  
AACCCGAACGAACAAAGTGTGAATTAATCGTACCAGTCTATACTGGGGTTATTACTCATTTTTGTACTTGGCTGTTTT



ATTTTCCAATTATTTCTTCAAT---ATG---  
GAAGTTAATATTCTCGCATTATTGCTACTGTGCTATTTCATTCTAGTTCTACTGCTTTTTTACTTATCATCTACGTAAA  
AACGGTTAGTCAAAAT-----GAT-----  
ATGGAAACAGCAACCCTAGTCACCATCTTCATATCTGGTTCACTTGTAAAGCTTTACTGGGTATGCCCTATATACCGCTTT  
TGGGCAA---CCCTCTCAACAATTAAGAGATCCTTTTGAAGAACACGGGGAC---  
ATGGAAGCATTGGTTTATACATTCCTGTTAGTATCGACTTTAGGGATAATTTTTTTTCCGCTATTTTTTTCCGAGACCCACC  
TAGGATTTCT-----ACTAAGAAG-----  
ATGACTATTGCTTTCCAATTGGCTGTTTTTGCATTAATTGCAACTTCGTTAATCTTAGTAATTGGTGTACCCGTTGTATT  
TGCTTCTCCTGATGGTTGGTCAAGTAATAAAAAATATTGTATTTTGGGTACATCATTGTGGATTGGATTAGTTTTTCTAG  
TGGGTATCCTTAATTCTCTCATCTCT---  
ATGTCACCAAAAACAGAGACTAAAGCTTATGTTGGATTCAAAGCTGGTGTAAAGATTACAAATTAACTTATTATACTCC  
TGAGTATGAAACCAAGATACTGATATCTTGGCAGCATTCCGAGTAACCTCCGCAACCCGGAGTTCCACCCGAAGAAGCAG  
GGGCTGCAGTAGCTGCCGAATCCTCTACTGGTACATGGACAAGTGTATGGACCGACGGACTTACCAGCCTTGATCGTTAC  
AAAGGACGATGCTACGACATCGAGCCCGTTGCTGGAGAGGAAAATCAATATATTTGCTATGTAGCTTATCCTTTAGACCT  
TTTTGAAGAAGTTCCGTTACTAACATGTTTACTTCCATTGTGGGTAATGTATTTGGCTTCAAAGCCCTACGAGCCCTAC  
GTCTGGAAGATCTACGAATCCCTCCTGCTTATTCCAAAACCTTTCCAAGGCCACCCCATGGAATCCAAGTTGAAAGAGAT  
AAATTGAACAAATATGGTCGCTCCTTATTGGGATGTACTATTAACCAAAGTTAGGGTTATCGGCTAAGAACTACGGTAG  
GGCGGTTTTATGAATGTCTCCGCGGTGGCCTTGATTTACCAAGGATGATGAAAATGTGAACTCCCAACCGTTTTATGCGCT  
GGAGAGACCGTTTTCTATTTTTGTGCCGAAGCTCTTTTTAAAGCGCAGACCGAAACGGGTGAAATTTAA-----  
GGACATTACTTAAATGCTACGGCGGGTACATGCGAAGAAATGATAAAAAGGGCCGATTTGCTAGAGAATTGGGAGTTCC  
TATTGTAATGCATGACTACTTAACCGGGGGATTACCAGCAAATACTAGCTTGGCTCATTATTGCCGAGACAACGGCCTAC  
TACTTCATATCCACCGTGCAATGCACGCAGTTATTGATAGACAGAAGAATCATGGTATGCACTTCC

Platanus

TCTAGGTTGGGGGGTAGGTCCTGGTGGGGAAGTTATAGACACTTTTCCATACTTTGTATCTGGAGTACTTCACTTAATTT  
CCTCTGCAGTATTGGGCTTTGGCGGTATTTATCATGCACTTCTCGGGCCTGAGACTCTGGAAGAATCTTTTCCATTCTTC  
GGTTATGTATGGAAAGATAGAAATAAAATGACCACAATTTTGGGTATTCCTTAATCTTGTAGGTATAGGTGCTTTTTCT  
TCTAGTACTCAAGGCTCTTTATTTTTGGGGCGTATATGATACCTGGGCTCCCGGGGG---GGAGATG---  
TAAGAAAAATTACCAACTTGACCCCTTAGCCCAAGTGTATATTTGGTTATTTTACTAAAAATCCCCCTTTGGGGGAGAAGGA  
TGATTGTTAGTGTGGACGATTTAGAAGATATAATTTGGAGGACATGTATGGTTAGGTTCC---  
ATTTGTATACTTGGTGAATCTGGCATACTTAACCAAACCTTTGCATGGGCTCGCCGCGCACTTGTATGGTCTGGAGA  
GGCTTACTTGTCTTATAGTTTGGTGTCTTTATCTGTCTTTGGTTTTCATCGCTTGTGCTTTGTCTGGTTCAATAATACCG  
CTTATCCTAGTGAGTTTTATGGGCCCCTGGGCCAGAAGCTTCTCAAGCTCAAGCATTACTTTTTCTAGTTAGAGATCAA  
CGTCTTGGGGCTAACGTGGGATCCGCTCAAGGACCTACTGGTTTGGTAAATATCTAATGCGTTCCCTACCAGGAGAGGT  
CATTTTTTGGAGGAGAACTATGCGTTTTTGGGATCTCCGTGCTCCCTGGTTGGAACCTCTAAGGGGTCCCAATGGTTTGG  
ACTTGAGTAGGCTGAAAAAAGACATACAA---  
CCTTGGCAAGAACGGCGTTCCGCGGAATATATGACTCATGCTCCTTTAGGTTCTTTAAATTCGGTGGGTGGCGTAGCTAC  
CGAGATCAATGCAGTCAATTATGTCTCTCCTAGAAGTTGGTTAGCTACCTCTCATTTTGTTCTAGGATTCTTCCCTATTTCG  
TGGGTCAATTTGTGGCATGCGGGAAGGGCCCGTGCAGCTGCAGCAGGATTTGAAAAAGGAATTGATCGTGATTTTCGAGCCT  
GTTCTTTCCATGACCCCTCTTAAC-----  
ATGACTATAGCCCTTGGTAGATTTACCAAAGACGAA-----  
AATGATTTATTTGATATTATGGATGACTGGTTACGGAGGGACCGTTTTCGTTTTTGTAGGTTGGTCCGGTCTATTGCTCTT  
TCCTTGTGCCTATTTTCGCTTTAGGAGGTTGGTTCACAGGTACAACCTTTGTAACCTTCATGGTATACCCATGGATTGGCCA  
GTTCCCTATTTGGAAGGCTGCAATTTCTTAACCGCCGACGTTTCTACTCCTGCTAATAGTTTAGCACATTCTTTATTGCTA  
CTATGGGGTCTGAAGCACAAGGAGATTTACTCGTTGGTGTCAATTAGGCGGTCTGTGGACTTTTGTGCTCTTCATGG  
CGTTTTCGGACTAATAGGTTTCATGTTACGTCAATTCGAACCTGCTCGATCTGTTCAATTGCGACCTTATAATGCAATCG  
CATTCTCTGCTCCAATTGCTGTTTTTGTCTGATTCTGATTTATCCACTTGGTCAGTCTGGTTGGTTTTTGCACCT  
AGTTTTGGTGTAGCAGCTATATTTGATTCATCCTCTTCTTCCAAGGGTTTTATAATTGGACGTTGAACCCATTTTCATAT  
GATGGGAGTTGCCGGCGTATTAGGTGCTGCTCTGCTATGCGCTATTTCATGGTGTACTGTAGAAAATACTTTATTGAAAG  
ATGGTGACGGTGCAAATACATTCCGTGCTTTTTAACCCTCAAGCTGAAGAGACTTATTCAATGGTCACCGCTAACCGC  
TTTTGGTCCCAAATCTTTGGGGTTGCTTTTTCCAATAAACGTTGGTTACATTTCTTTATGTTATTTGTACCCGTAACCTGG  
TTTATGGATGAGTGCTCTTGGAGTAGTCGGTCTGGCTCTGAACCTACGTGCCTATGACTTCGTTTTCCAGGAAATCCGTG  
CAGCGGAAGATCCTGAATTTGAGACTTTCTACACCAAAAACATTCTCTTAAACGAAGGATTTTCGTGCTTGGATGGCGGCT  
CAAGATCAGCCTCATGAAAACCTTATATCCCTGAGGAGGTTTACCCCGTGGAAACGCTCTT---  
ATGTCTGGAAGCACGGGAGAACGTTCTTTTGTGATATTATTACCAGTATTCGATACTGGGTCACTCATAGCATTACTAT  
ACCTTCCCTATTCATTGCGGGTTGGTTATTCGTGACACGGGTTTAGCTTACGATGTGTTTGGAAAGCCCTCGGCCAAACG  
AGTATTTTACAGAGAGCCGACAAGGAATTCATTAATAACTGGCCGTTTTGATCCTTTGGCACAACCTCGATGAATTTAGT  
AGATCCTTT---

ATGACCATAGATCGAACCTATCCAATTTTTACAGTGCATGGTTGGCTGTTACGGACTGGCTGTACCTACCGTTTCTTT  
TTTGGGGTCAATATCAGCAATGCAGTTCATCCAACGA-----  
ATGGCTACACAAAGCGTTGAGGGTAGT---TCT---AGATCTGGT-----  
CCAAGACGAACCTATTACAGGGGATTTATTGAAACCATTGAATTCGGAATATGGTAAAGTAGCTCCTGGATGGGGAACTAC  
CCCTTTGATGGGTGTCGCAATGGCTCTATTTGCGATATTCCTATCTATTATTTGGAGATTTATAATTCTTCCGTTTTAC  
TGGATGGAATTTCAATGAGT-----  
ATGCTTACTCTCAAACCTCTTCGTTTACACAGTAGTGATATTCTTTGTTTCTCTCTTCATCTTCGGATTCTATCTAATGA  
TCCAGGACGTAATCCTGGA---CGCGAGGAA-----  
ATGGCCGATACTACTGGAAGGATTCCTCTTTGGCTGATAGGTACTGTAAGTGGTATTCTGTGATCGGTTCAATAGGTAT  
TTTCTTTTACGGTTCATATTCGGATTGGGTTTCATCCCTG-----ATGCTT-----  
AATATCTTTGGTTGATTTGT-----CTTAATTCCTGCCCTT---CATTG-----  
AGTAGTTTTTTCTTTGCCAAATTGCCTGAGGCTTACGCTTTTTTCAATCCAATTGTAGATGTTATGCCAGTCATACCTGT  
GCTCTTTTTTCTTTAGCCCTTGTGGCAAGCTGCTGTAAGTTTTCGA---ACGACACAATCA-----  
AACCCGAACGAACAAAATGTTGAATTAACCGTACCAGTCTCTACTGGGGGTTATTACTCATTTTTGTACTTGCTGTTTT  
ATTTTCCAATTATTTCTTCAAT---ATG---  
GAAGTAAATATTCTCGCATTATTGCTACTGCACTGTTTATTCTAGTTTCTACTGCCTTTTTACTTATCATCTACGTAA  
AACAGTCAGTCAAAAT-----GAT-----  
ATGGAAACAGCAACCCTAGTCGCCATCTCTATATCTGGTTCACTTGTAAAGTTTTACTGGGTACGCCTTATATACCGCTTT  
TGGGCAG---CCCTCTCAACAATAAGAGATCCATTTCGAGGAACACGGGGAC---  
ATGGAAGCATTGGTTTATACATTCTCTTAGTCTCGACTCTAGGGATAATTTTTTTCGCTATCTTTTTTCGAGAACCGCC  
TAAAGTTCCG-----ACTAAAAAGATGAAA---  
ATGACTATTGCTTTCCAATTGGCTGTTTTTGCATTAATTGCTACTTCATCAATCTTACTGATTAGTGTACCCGTTGTATT  
TGCTTCTCCTGAAGGTTGGTCAAGTAACAAAATGTTGTATTTCCGGTACATCATTATGGATTGGATTAGTCTTTTTGG  
TGGGTATCCTTAATTCTCTCATCTCT---  
ATGTCACCACAAACAGAGACTAAAGCAAGTGTGGATTCAAAGCTGGTGTAAAGATTACAAATTGACTTATTATACTCC  
TGACTATGAAACCAAAGATACTGATATCTTGGCAGCATTCCGAGTAACTCCTCAACCTGGAGTTCACCTGAGGAAGCAG  
GGGCCGCGGTAGCTGCCGAATCTTCTACTGGTACATGAGACAACCTGTGTGGACCGATGGACTTACTAGCCTTGATCGTTAC  
AAAGGACGATGCTACCACATCGAGCCCGTGTGCTGGAGAAGAAAATCAATATATTGCTTATGTAGCTTACCCTTTAGACCT  
TTTTGAAGAAGGTTCTGTACTAACATGTTTACTTCCATTGTGGGTAATGTATTTGGGTTCAAAGCCCTACGTGCTCTAC  
GTCTGGAGGATCTGCAATCCCTCCTGCTTATTCTAAAACCTTCCAAGGACCACCTCATGGTATCCAAGTTGAGAGAGAT  
AAATTGAACAAGTATGGTGCCTCTATTGGGATGTAATAAACCAAAATTGGGGTTATCCGCTAAGAAGTACGGTAG  
AGCGGTTTATGAATGTCTTCGCGGTGGACTTGATTTTACCAAGGATGATGAGAACGTGAACCTCCAACCATTTATGCGTT  
GGAGAGACCGTTTCTTATTTTGTGCCGAAGCAATTTATAAAGCACAGGCCGAAACAGGTGAAATCAA-----  
GGGCATTACTTGAATGCTACGGCGGGTACATGTGAAGAAATGATTAAGGGGCTGTATTTGCCAGAGAATTAGGAGTTCC  
TATCGTAATGCATGACTACTTAAACGGGGGATTCACTGCAAATACTAGCTTGGCTCATTATTGCCGAGATAATGGCCTAC  
TTCTTACATCCATCGCGCAATGCATGCAGTTATTGATAGACAGAAGAATCATGGTATACACTTTC

Populus

TCTAGGTTGGGGGGTGGGTCTGGCGGGGAAGTCATAGACACCTTTCCATACTTTGTATCTGGCGTACTTCACTTAATTT  
CCTCTGCAGTATTGGGCTTTGGCGGTATTTATCATGCACTTCTAGGACCCGAGACTCTTGAAGAATCTTTTCCATTTTTT  
GGTTATGTATGGAAAGATAGAAATAAAATGACAACAATTTTAGGTATTCATTAATCTTGCTAGGTATAGGTGCTTTTTCT  
TCTAGTATTCAAAGCTCTTTATTTTGGGGGCGTATATGATACCTGGGCTCCGGGGGGG---GGAGATG---  
TAAGAAAAATTACCAACTTGACCCTTAGCCCAAGTGTTATTTTTGGTTATTTACTAAAATCTCCTTTTGGAGGAGAAGGA  
TGGATTGTTAGTGTGGATGATTTGGAAGATATAATTGGGGGGCATGTATGGTTAGGTTCC---  
ATTTGTATACTTGGTGGAACTTGGCATACTTAAACCAAACCCTTTGCATGGGCTCGCCGTGCACCTGTATGGTCCGGGGA  
GGCTTATTTGTCTTATAGTTTAGGCGCTTTAGCTGTTTTTGGTTTTATTGCTTGTGTCTTGTCTGGTTCAATAATACCG  
CTTATCCTAGTGAGTTTTACGGGCCCACTGGACCAGAAGCTTCTCAAGCTCAAGCTTTTACTTTTCTAGTTAGAGACCAA  
CGTCTTGGGGCTAACGTGGGATCCGCTCAAGGACCTACCGGCTTAGGTAATATCTAATGCGTTCCGCCACCGGAGAAGT  
TATTTTTGGAGGAGAAACTATGCGTTTTTGGGATCTGCGGCTCCTTGGTTAGAACCCTCTAAGAGTCCAATGGTTTTGG  
ACTTGAGTAGGTTGAAAAAAGACATACAA---  
CCTTGGCAAGAACGACGTTCTGCGGAATATATGACCCATGCGCCTTTAGGTTTATTAAATCCGTTAGGTGGCGTAGCTAC  
CGAGATCAATGCAGTCAACTATGTCTCTCCTAGAAGTTGGTTAGCTACCTCTCATTTTGTTCTCGGGTTCTTCTTATTG  
TAGGTCAATTTATGGCACGCGGGAAGGGCTCGTGCAGCTGCAGCAGGATTTGAAAAGGAATTGATCGTGATTTTGAACCT  
GTTCTTTCCATGACTCCTCTTAAC-----  
ATGACTATAGCACTTGGTAAATTTACCAAAGATGAA-----  
AATGATTTATTTGATATTATGGATGACTGGTTACGGAGGGACCGTTTTCGTTTTTGTGGGTTGGTCCGGTCTATTGCTCTT  
TCCTTGTGCCTATTTTGCCTTAGGGGGTGGTTACAGGTACAACCTTTGTAACCTCATGGTATACCCATGGATTGGCCA  
GTTCTATTTGGAAGGTTGCAACTTCTTAACCGCCGAGTTTCTACTCCTGCTAATAGTTTAGCCATTCTTTATTATTA

CTATGGGGTCTCTGAAGCACAAGGAGATTTTACTCGTTGGTGTCAATTAGGTGGCTTGTGGACTTTTGTGCTCTCCACGG  
AGCTTTTCGGACTAATAGGTTTTATGTTACGTCAATTTGAACTTGTCTCGATCCGTGCAATTACGACCTTATAATGCAATCG  
CATTCTCTGGTCCAATTGCGGTTTTTGTCTGTATTCTGATTTATCCACTAGGTCACTGTGGTTGGTTCTTTGCGCCT  
AGTTTTGGCGTAGCAGCTATATTTTCGATTCATCCTCTTTTTCCAAGGATTTTATAATTGGACACTGAACCCATTTTCATAT  
GATGGGAGTTGCCGGTGTATTGGGCGCTGCTCTGCTATGCGCTATTCATGGTGTACTGTAGAAAATACTTTATTTGAAG  
ATGGTGATGGTGCAAATACATTCCGTGCTTTTAAACCAACTCAAGCTGAAGAACTTATTCCATGGTCACCGCCAACCGC  
TTTTGGTCCCAAATTTTTGGGGTTGCTTTTTCCAATAAACGTTGGTTACATTTCTTTATGTTATTTGTACCAGTAACCGG  
TTTATGGATGAGTGTCTTTGGAGTAGTTGGTCTGGCTCTGAACCTACGTGCCTATGACTTCGTTTTCTCAGGAAATCCGTG  
CAGCGGAAGATCCTGAATTTGAGACTTTCTATACCAAAAAATATTCTTTTAAATGAAGGCATTTCGTGCTTGGATGGCGGT  
CAAGATCAGCCTCATGAAAACCTTATATCCCTGAGGAGGTTCTACCCCGTGGAAACGCTCTT---  
ATGTCTGGAAGCACAGGAGAACGTTCTTTTGTGATATTATTACCAGTATTCGATATTGGGTCATTTCATAGCATTACTAT  
ACCTTCCCTATTCATTGCAGGTTGGTTATTTCGTGAGCAGGTTTAGCTTATGATGTATTTGGAAGCCCTCGTCCAAATG  
AATATTTTACAGAGAGCCGACAAGGAATCCCTTAATAACTGGCCGTTTTGATCCTTTGGAACAACCTTGATGAATTTAGT  
AGATCTTTT---  
ATGACTATAGATCGAACCTATCCAATTTTTACAGTGCATGGCTTGTGTTACCGACTAGCTGTACCTACCGTTTCTTT  
TTTGGGGTCAATATCAGCAATGCAGTTCATCCAACGA-----  
ATGGCTACACAAAGCGTTGAGGGGAGT---TCT---AGATCTGGT-----  
CCAAGACGAATATTGTAGGGGATTTATTGAAACCATTGAATTCGGAATATGGTAAAGTAGCTCCGGGTTGGGGAACCTAC  
TCCTTTGATGGGTGTCGCAATGGCTCTATTTGCGGTATTCTATCTATTATTTTGGAGATTTATAATTTCTTCCGTTTTAC  
TGGATGGAATTTCAATGAAT-----  
ATGCTTACTCTCAAACCTTTTGTTTACACAGTAGTAATATTCTTTGTTTCCCTTTTCATCTTTGGATTTTTATCTAATGA  
TCCAGGGCGTAATCCTGGA---CGTGAAGAA-----  
ATGGCCGATACTACTGGAAGGATTCCTCTTTGGATAATAGGTACTGTAACCTGGTATTCCTGTGATCGGTTTAAATAGGTAT  
TTTCTTTTATGGCTCCTATTCCGGCTTGGGTTTCATCCCTG---ATGTTTGTATGCTT-----  
AATATTTTAAATTTGATTTGTATCTGTCTTAATTTTGCCTT---TATTCA-----  
AGCAGTTTTTTCTTACAAAATTGCCTGAAGCCTACGCTTTTTTGAATCCAATCGTAGATGTTATGCCAGTAATCCCTCT  
GTTCTTTTTTCTATTAGCCTTTGTTTGGCAAGCTGCTGTAAGTTTTCGA---ATGACACAATCA-----  
AACCCGAACGAACAAAACGTTGAATGAATCGTACCAGTCTTTACTGGGGGTTATTACTCATTTTTGTACTTGTGTTTT  
ATTTTCTAATTTCTTTAAT---ATG---  
GAAGTAAATATTCTCGATTTATTGCTACTGCACTGTTTCATTCTAGTTTCTACTGCTTTTTTACTTATAATATATGTAA  
AACTGTTAGTCAAAGT-----GAT-----  
ATGGAAACAGCAACCCTAGTCGCCATCTCTATATCTGGTTTACTTGTAAAGTTTTACTGGGTATGCCTTATATACTGCTTT  
TGGGCAA---CCCTCTCAACAATAAGAGATCCATTTCAGGAACACGGGGAC---  
ATGGAAGCATTAGTTTATACATTCCTCTTAGTATCGACTCTAGGAATAATTTTTTTTTCGCTATCTTTTTTTCGAGAACC  
TAAAGTTCCA-----ACTAAAAAGGTGAAA---  
ATGACTATTGCTTTCCAATTGGCTGTTTTTGCATTAATTGCTACTTTCGTCAATCTTATTAATTAGTGTACCTGTTGTTTT  
TTCTTCTCCTGACGGTTGGTCAAGCAACAAAATGTTGTATTTCCGGTACATCATTATGGATTGGATTAGTCTTTCTGG  
TAGGTATTCTTAATTTCTCTCATCTCT---  
ATGTCACCACAAACAGAGACTAAAGCAGGTGTTGGATTCAAGGCTGGTGTAAAGATTATAAATTGACTTATTATACTCC  
TGACTATGAAACCAAAGATACTGATATCTTGGCAGCATTCCGAGTAACCTCCTCAACCTGGAGTTCCGCCCGAGGAAGCAG  
GGGCCGCAGTAGCTGCTGAATCTTCTACTGGTACATGGACAACCTGTGTGGACCGACGGGCTTACCAGTCTTGATCGTTAT  
AAGGGACGATGCTACGACATCGAGCCCGTTGCTGGAGAAGAAAATCAATTTATTGCTTATGTAGCTTACCCCTTAGACCT  
TTTTGAAGAAGGTTCTGTTACTAACATGTTTACTTCCATTGTGGGTAATGTATTTGGGTTCAAAGCCCTACGCGCTCTAC  
GTCTGGAGGATTTGCGAATTCCTCCTGCTTATGTTAAACTTTTTCAAGGCCACCTCATGGTATCCAAGTTGAAAGAGAT  
AAATTGAACAAGTATGGTCGCCCCCTATTGGGCTGTACTATTAACCTAAATTTGGGGTTATCCGCTAAGAATTACGGTAG  
AGCAGTTTATGAATGTCTACGCGGTGGACTTGATTTTACCAAAGATGATGAGAACGTGAACCTCCAACCATTTATGCGTT  
GGAGAGATCGTTTCTTATTTTTGTGCCGAAGCACTTTATAAAGCACAGGCTGAAACCGGTGAAATCAA-----  
GGGCATTATTTAAACGCTACTGCAGGTACATGCGAAGAAATGATCAAAGGGCTGTATTTGCCAGAGAATTGGGAGTTCC  
TATCGTAATGCATGACTACTTAAACAGGGGGATTACCAGCAAACTAGTTTGGCTCATTATTGCCGAGATAATGGTTTAC  
TTCTTACATCCATCGCGCAATGCATGCAGTTATTGATAGACAGAAAATCATGGTATACACTTTC  
Ranunculus  
TCTAGGTTGGGGAATAGGCCCTGGGGGGGAAGTTATAGACACTTTTCCATACTTTGTATCTGGAGTACTTCACTTAATTT  
CCTCTGCAGTATTAGGCTTCGGCGGTATTTATCATTCACTTCTCGGGCCCGAAACTCTTGAAGAATCTTTTCCATTCTTC  
GGTTATGTATGGAAAGATAGAAAATAAAATGACCACAATTTTGGGGATTCACTTAATCTTGTAGGTATAGGTGCTTTTCT  
GTTAGTACTCAAGGCTCTTTATTTTTGGGGGAGTATATGATACCTGGGCTCCTGGGGG---GGAGATG---  
TAAGAAAAATTTCCAACCTTGACACTTAGCCCAAGTATTATATTTGGTTATTTACTAAAATCTCCTTTTGGAGGAGAGGGT  
TGGATTGTTAGTGTGGACGATTTAGAAGATATAATTGGAGGACATGTATGGTTAGGTTCC---

ATTTGTATATTTGGTGGAACTCTGGCATATCTTAACCAAACCCTTTGCGTGGGCTCGACGAGCGCTTGTATGGTCTGGCGA  
AGCTTACTTGTCTTATAGTTTGTAGCTGCTTTATCTGTTTTTGGTTTTACCGCTTGTGTTTTGTCTGGTTCAATAATACCG  
CTTATCCTAGTGAGTTTTATGGGCCTACTGGCCAGAAGCTTCTCAAGCTCAAGCATTCACTTTTTCTAGTTAGAGACCAA  
CGTCTTGGGGCTAACGTCGGATCCGCTCAAGGACCCACAGGTTTTGGGTAAATATCTAATGCGTTCTCCGACTGGAGAGGT  
CATTTTTGGAGGAGAACTATGCGGTTTTGGGATCTCCGTGCTCCATGGTTGGAACCTCTAAGGGGTCCTAATGGTTTGG  
ACTTGAGTAGGCTGAAAAAAGATATACAA---  
CCTTGGCAAGAACGTCGTTCCGCGGAATATATGACTCATGCTCCTTTAGGTTCTTTAAATTCGGTCCGGTGGTGTAGCTAC  
CGAGATCAATGCAGTCAATTATGTTTCGCCTAGAAGTTGGTTATCCACCTCTCATTTTTGTTCTAGGATTCTTCCTATTTCG  
TGGGTCACCTTGTGGCATGCGGGAAGGGCCCGTGCAGCTGCCGAGGATTTGAAAAAGGAATTGATCGGGATTTGGAACCT  
GTTCTTTTCATGACCCTCTTAAC-----  
ATGACTATAGCCCTTGGTAGATTTACCAAAGACGAA-----  
AAGGATTTATTTGATACTATGGATGACTGGTTACGGAGAGACCGTTTTCGTTTTTGTAGGTTGGTCTGGTCTATTGCTCTT  
CCCCTGCGCCTATTTTTGCTTTAGGGGGTTGGTTACGGGTACAACCTTTGTAACCTCCTGGTATACCCATGGATTGGCTA  
GCTCCTATTTGGAAGGATGCAATTTCTTAACCGCCGAGTTTCTACTCCTGCTAATAGTTTACGACACTCTTTGTTGTTA  
CTATGGGGTCTGAAGCACAAGGAGATTTCACTCGTTGGTGTCAATTAGGTTGGTCTATGGACTTTTTGTTGCTCTCCACGG  
TGCTTTCCGACTAATAGGTTTTCATGTTACGTCAATTCGAGCTTGCTCGATCTGTTCAATTGCGACCTTATAATGCAATCG  
CATTCTCCGGTCCAATTGCCGTTTTTGTCTGTATTCTGATTTATCCATTAGGTCAATCTGGTTGGTTCTTTGCACCT  
AGTTTTGGTGTAGCAGCTATATTTTCGATTCATCCTCTTCTTCCAAGGATTTATAATTGGACGTTGAATCCATTTTCATAT  
GATGGGAGTTGCCGGCGTATTAGGCGCTGCTCTACTATGTGCTATTTCATGGTGTACCGTGGAAAATACTTTATTTCGAAG  
ATGGTGACGGTGCAAATACATTCCGTGCTTTTAACCAACTCAAGCAGAAGAGACTTATTCAATGGTCACTGCTAACC GG  
TTTTGGTCTCAAATCTTTGGGGTTGCTTTTTCCAATAAACGTTGGTTACATTTCTTTATGCTATTTGTACCAGTAACCGG  
TTTATGGATGAGTCTTTGGAGTAGTCGGTCTGGCTCTGAACCTGCGTGCCTATGACTTTGTTTCCAGGAAATCCGTG  
CAGCGGAAGATCCCGAATTTGAGACTTTCTACACCAAAAATATTCTTTTAAACGAGGGTATTTCGTGCTTGGATGGCGGCT  
CAGGATCAGCCTCATGAAAACCTTATATTTCCCGGAGGAGTTTCTACCCCGTGGAAAACGCTCTT---  
ATGTCTGGAAGCACGGGAGAACGTTCTTTTGCTGATATTATCACAGTATTCGATACTGGGTCATTTCATAGCATTACTAT  
ACCTTCCCTATTTCATGCGGGTTGGTTATTTCGTGAGTACGGGGCTAGCTTATGATGTGTTTGGAAAGTCCCTCGGCCAAATG  
AGTATTTTACAGAGAACCGACAAGGAATTCATTAATAACAGGCCGTTTTGATTCTTTGGCGCAACTCGACGAATTTAGT  
AGATCCTTT---  
ATGACTATAGATCGAACCTATCCAATTTTTACAGTGAGATGGTTGGCTGTTACGGACTAGCTGTACCTACCGTTTTCTTT  
TTTGGGGTCAATATCTGCAATGCAGTTCATACAACGA-----  
AATGCAATAGGATTTATGGCTACACAAACCATTGAGGGTAGT---TCT---AAATCTGGT-----  
CCAAGAGGAAGTACTGTGGGGAGTTTATTGAAACCGTTAAATTCGGAATATGGAAAAGTAGCTCCTGGTTGGGGGACTAC  
CCCTTTGATGGGGTTGCAATGGCACTATTTGCAGTATTCTTATCTATTATTCTCGAGATTTATAATTCATCCGTTTTAC  
TGGATGGAATTTTCGATGAAT-----  
ATAATCTATTCCCTTTTTACCAAAAATGATCTTTATCTTGGAGATTTTGTAAATGCTTACTCTCAAACCTCTTCGTTTTACAC  
AGTGGTGATATTCTTTGTTTCTCTTTATTTTTGGATTCTATCTAATGATCCAGGACGTAATCCCGGG---  
CGTGAGGAA-----  
ATGGCCGATACTACTGGAAGGATTCTCTTTGGCTTATAGGCAGTGTAGCTGGTATTCTTGTGATCGGTTTTAATAGGTGT  
TTTCTTTTATGGTTTCATATTCTGGATTGGGCTCATCCCTG-----ATGCTT-----  
AATATCTTTAGTTTGTATCTGATCTATCTTAATTCTATACTG---CATTCA-----  
AGTCATTTTTTATTTGCCAAATTGCCTGAGGCTTACGCTTTTTTTAAACCAATCGTAGATATTATGCCAGTCATACCTTT  
GTTCTTTTTGCTCTTAGCCTTTGTTTGGCAAGCTGCTGTAAGTTTTTCGA---ATGACACAATCA-----  
AACCCGAACGAACAAAGTGTGAATTGAATCGTACCAGTCTTTATTGGGGGTTATTACTCATTTTTGTACTTGTGTTTT  
ATTTTCCAATTATTTCTTCAAT---ATG---  
GAAGTAAATATTCTCGCATTTCATTGCTACTGCCTGTTTACTTCTAGTTTCTACTGCTTTTTTACTTATTATTTACGTAAA  
AACGGTCAAGTCAAAAT-----GAT-----  
ATGGAACCGCAACCCTAGTCGCCATCTTTATATCTGGTTTTACTTGTAAAGTTTTACCGGGTACGCCTTATATACCGCTTT  
TGGGCAA---CCCTCTCAACAATAAGAGATCCATTTCGAGGAACACGGAGAC---  
ATGGAAGCATTGGTTTTATACATTCTCTTAGTTTCGACTCTAGGAATTTTTTTTTCGCTATATTTTTCCGAGAGCCGCC  
TAAGGTTCCG-----ACTAAAAA-----  
ATGACTATTGCTTTCCAATTGGCTGTTTTTGCATTAATTGCTACTTTCATCAATCTTATTGATTAGTGTACCCGTTGTATT  
TGCTTCTTCTGACGGTTGGTCAAGTAACAAAAATTTTGTATTTTCCGGTACATCATTATGGATTGGATTAGTCTTTCTAG  
TAGCTATCCTTAATTCTCTCATCTCT---  
ATGTCACCACAAACAGAGACTAAAGCAAGTGTGGCTTCAAAGCAGGTGTTAAAGAGTACAAATTGAATTATTATACTCC  
TGAGTATGAACCCAAAGATACAGATACCTTGGCGGCATTCCGAGTAACCTCAACCGGGGAGTTCCACCTGAAGAAGCGG  
GGGCTGCTGTAGCTGCCGAATCTTCTACAGGTACATGGACAACCTGTGTGGACCGATGGACTTACCAGCCTTGATCGTTAC  
AAAGGACGATGCTACCACATTGAGCCCCTTGGTGGAGAAGAAAATCAATATATTTGTTATGTAGCCTATCCTTTAGATCT

TTTTGAAGAAGGTTCTGTTACTAACATGTTTACTTCTATTGTGGGTAATGTATTTGGTTTTCAAAGCGTTACGCGCTCTGC  
GTCTGGAAGATCTGCGAATTCCTGTTGCTTATGTTAAACTTTCCAAGGCCCGCTCACGGTATCCAAGTTGAGAGAGAT  
AAATTGAACAAGTATGGTCGCCCTCTATTGGGATGTACTATTAACCAAATTAGGATTATCTGCTAAGAACTACGGTAG  
GGCGGTTTTATGAATGTCTCCGCGGTGGACTTGATTTTACCAAGGATGATGAGAACGTGAACCTCCAACCCTTTATGCGTT  
GGAGAGACCGTTTTCTTTTTTGTGCTGAAGCAATTTATAAAGCACAGGCCGAAACAGGTGAAATCAAA-----  
GGACATTACTTGAATGCTACTGCGGGTACATGCGAAGATATGATGAAAAGGGCTGTATTTGCCAGAGAATTGGGAGTACC  
CATCGTAATGCATGACTACTTAACGGGGGGATTACCAGCAAATACTAGCTTGGCTCATTATTGCCGCGATAATGGTCTAC  
TTCTTCACATCCACCGCGCAATGCATGCAGTTATTGATAGACAAAAGAATCATGGTATACATTTCC

Spinacia

TCTAGGTTGGGGGTAGGCCCTGGCGGGGAAGTTATAGACACTTTTCCATACTTTGTATCGGGAGTACTTCACTTAATTT  
CGTCGGCCGTATTGGGCTTTGGTGGTATTTATCATGCACTTTTGGGCCCTGAAACTCTTGAAGAATCTTTTCCATTCTTC  
GGTTATGTGTGGAAAGATAGAAATAAAATGACCACAATTTTGGGCATTCACTTAATCTTGTAGGTATAGGCGCTTTTCT  
TCTAGTATTCAAGGCTCTTTATTTTGGGGCGTATATGATACATGGGCTCCCGGAGGT---GGAGATG---  
TAAGAAAAATTACCAACGTACCCTTAGTCCAAGTATTATATTTGGTTGTTTACTAAAATCGCCTTTTGGAGGAGAAGGG  
TGGATTGTTAGTGTAGACGATTTGGAAGATATAATAGGGGGCATGTATGGATAGGTGTC---  
ATTTGTATACTTGGTGAATCTGGCATAATTTAACAAAACCTTTTGCATGGGCTCGCCGCGCACTTGTCTGGTCTGGCGA  
GGCTTATTTGTCTTATAGTTTGGCTGCTTTATCTGTCTTTGGTTTTATTGCTTGTGTTTTGTCTGGTTCAATAATACTG  
CTTATCCTAGTGAGTTTTACGGGCCACTGGACCAGAAGCTTCTCAAGCTCAAGCATTACTTTTTTAGTTAGAGACCAA  
CGTCTTGGGGCTAACGTGGGATCCGCTCAAGGACCTACTGGTTTAGGTAAGTATCTAATGCGTTCTCCGACTGGAGAAGT  
TATTTTGGGGGCGAAACTATGAGGTTTTGGGATTTGCGCGCTCCGTGGTTAGAACCCTAAGAGGTCCAAACGGTTTG  
ACTTGAGTGCCTGAAAAAAGATATACAA---  
CCTTGGCAAGAACGACGTTCCAGCAGAATATATGACTCATGCTCCTTTAGGTTCTTTAAATTTCTGTGGGTGGGGTGGCTAC  
CGAGATCAATGCAGTCAATTATGTCTCTCCTAGAAGTTGGTTATCTACTTCTCATTTTGTTCTAGGATTCTTCCCTATTCCG  
TAGGGCATTGTGGCATGCGGGAAGGGCTCGTGCAGCTGCAGCAGGATTTGAAAAGGAATTGATCGTGATTTTGAACCT  
GTTCTTTGATGACCCCTCTTAAT-----  
ATGACTATAGCCGTTGGTAAATTTACCAAAGACGAA-----  
AAAGATTTATTTGATAGTATGGATGACTGGTTACGGAGGGACCGTTTTGTTTTGTAGGTTGGTCTGGTCTATTGCTCTT  
TCCTTTGTCTTATTTTCGCTTAGGGGTTGGTTTTACGGGTACAACCTTTGTAACCTTCATGGTATACCCATGGATTGGCCA  
GTTCTTATTTGGAAGGCTGCAATTTCTTAACCCGACAGTTTCTACTCCTGCTAATAGTTTAGCCACTCTTTATTGTTA  
CTGTGGGGTCTGAAGCACAAGGGGATTTTACTCGTTGGTGTCAATTAGGTGGCCTGTGGGCTTTTGTGCTCTTCATGG  
TGCTTTTCGCACTAATAGGTTTTATGTTACGTCAATTCGAACCTTGCTCGGTCTGTTCAATTGCGCCCTTATAATGCAATCG  
CATTCTCTGGTCCAATTGCTGTTTTTGTCTGTATTCTGATTTATCCACTAGGTCAATCTGGTTGGTTCTTTGCGCCT  
AGTTTTGGTGTAGCAGCTATATTCCGATTCATTCTCTTTTTTCAAGGGTTTCATAATTGGACGCTGAACCCATTTCATAT  
GATGGGAGTTGCCGGTGTATTGGGCGCCGCTCTGCTATGCGCTATTATGGTGCTACCGTTGAAAATACTTTATTTGAAG  
ATGGTGTAGGGGCAAATACATTCCGGGCTTTTAAACCAACCCAAGCTGAAGAACTTATTCAATGGTACCAGTAACCGC  
TTTTGGTCCCAAATCTTTGGGGTTGCTTTTTCCAATAAACGTTGGTTACATTTCTTTATGTTATTTGTACCAGTAACCGG  
TTTATGGATGAGTGTCTTTGGAGTAGTCGGTCTGGCTTTGAACCTACGTGCCTATGACTTCGTTTCCAGGAAATCCGTG  
CAGCTGAAGATCCTGAATTTGAACTTTTTACACCAAAAATATTCTCTTAAACGAGGGTATCCGTGCTTGGATGGCGGCT  
CAAGATCAGCCTCATGAAAACCTTATATTCCCTGAGGAGGTTTACCCCGTGGAAACGCTCTT---  
ATGTCTGGAAGCACAGGAGAACGTTCTTTTGTGATATTATTACCAGTATTCGATACTGGGTTATTTCATAGCATTACTAT  
ACCTTCCCTATTTCATTGCGGGTTGGTTATTTCGTGAGCACAGGTTTAGCTTACGATGTGTTTGGAAAGCCCTCGTCCAAACG  
AATATTTACAGAGAGCCGACAAGGAATTCATTAATAACTGGCCGTTTTGACTCTTTGGAACAACCTTGATGAATTTAGT  
AGATCCTTT---  
ATGACCATAGATCGAACCTATCCAATTTTTACAGTGCCTGGCTGGCTATTCACGGACTGGCTGTACCTACCGTTTCTTT  
TTTGGGGTCAATATCCGCAATGCAGTTCATCCAACGA---  
ATGAATATAATCAGATTTATGGCTACACAAACCGTTGAGAGTAGT---TCT---AGATCTCGT-----  
CCAAAACCTACTACTGTAGGGGCTTTATTGAAACCGTTGAATTCGGAATATGGTAAAGTAGCTCCTGGGTGGGGAACCTAC  
TCCTTTGATGGGAGTTGCAATGGCTTTATTTGCAGTATTCTTATCTATTATTTGGAATTTATAATTCGTCCGTTTTAC  
TGGATGGAATTTCCATGAAT-----  
ATGCTTACTCTCAAACCTTTGTTTACACAGTAGTAATATTCTTTGTTTCTCTCTTCAATTTTCGGATTCCCTATCTAATGA  
CCCAGGACGTAATCCTGGA---CGCGAAGAA-----  
ATGGCCGATACTACTGGAAGAATTCCTCTTTGGATAATAGGGACTGTAGCTGGTATTCTTGTGATCGGTTTAGTAGGTAT  
TTTCTTTTATGGTTCATATTCTGGATTAGGCTCATCGCTG-----ATGCTT-----  
AATATCTTTAGTTTGTATCTGT-----CTTAATTCTGCCCTT---TATTCG-----  
AGTAGTTTTTTCTTCGGCAAATTACCTGAGGCCTACGCTTTTTTGGTCCAATCGTAGATTTTATGCCAGTCATACCTTT  
ATTCTTTTTTCTATTAGCCTTTGTTTGGCAAGCTGCTGTAAGTTTTTTCGA---ACGACACAATCA-----  
AACCCGAACGAACAAAATGTTGAATTGAATCGTACCAGTCTTTATTGGGGGCTATTACTCATTTTTGTACTTGGTGT

ATTTTCGAATTATTTTTTCAAT---ATG---  
GAAGTAAATATTCTCGCATTATTGCTACTGCCTATTCTAGTTCTACTGCTTTTTTACTTATTATCTATGTAAA  
AACGGTTAGCCAAAAT-----GAT-----  
ATGGAAACAGCAACCCTAGTCGCCATCTTTATATCTGGTTTACTTGTAAAGTTTTACTGGGTATGCTTTATATACCGCTTT  
TGGGCAA---CCCTCTCAACAATTAAGAGATCCCTTCGAGGAACACGGAGAC---  
ATGGAAGCATTGGTTTATACATTTCTATTAGTCTCTACTTTAGGGATTATTTTTTTTTGCGATCTTTTTTCGGGAACCTCC  
TAAATTTCA-----ACTAAAAA-----  
ATGACTATAGCTTTCCAATTGGCTGTTTTTGCATTAATTGCCACTTCATCAATCTTACTGATTAGCGTACCCGTTGTATT  
TGCTTCTCCCGACGGTTGGTCAAGTAACAAAAATATTGTATTTCCGGTACATCATTATGGCTTGGATTAGTCTTTCTGG  
TGGGTATCCTTAATTCTCTCATCTCT---  
ATGTCACCACAAACAGAGACTAAAGCAAGTGTGGATTTAAAGCTGGTGTAAAGATTACAAATTGACTTATTATACTCC  
TGAGTATGAAACCCTAGATACTGATATCTTGGCAGCATTCCGAGTAAGTCTCAACCTGGAGTTCCACCCGAAGAAGCAG  
GGGCTGCAGTAGCTGCTGAATCTTCTACTGGTACATGGACAACGTATGGACCGACGGACTTACCAACCTTGATCGTTAC  
AAAGGACGATGCTACCACATCGAGCCCCGTTGCTGGAGAAGAAAATCAATATATTTGTTATGTAGCGTATCCTTTAGACCT  
TTTTGAAGAAGTTCTGTTACTAACATGTTTACTTCCATTGTGGGTAACGTATTTGGGTTCAAAGCCTTGCGTGCTCTAC  
GTTTGGAAAGATTTGCGAATCCCTGTTGCTTATGTAAAACTTTCCAAGGCCCGCTCACGGTATCCAAGTTGAGAGAGAT  
AAATTGAACAAGTATGGTTCGTCCTTATTGGGATGCACCATTAAACCTAAATTAGGTTTATCCGCTAAAACTATGGTTCG  
CGCAGTTTATGAATGTCTTCGCGGTGGACTTGATTTTACCAAAGATGATGAAAACGTGAACTCCCAGCCGTTTATGCGTT  
GGAGAGACCGTTTCTATTTTGTGCCGAAGCTCTTTATAAAGCACAAAGCCGAAACAGGCGAAATCAA-----  
GGGCATTACTTGAATGCTACCGCGGGTACATGCGAAGATATGATGAAAAGGGCTGTATTTGCCAGAGAATTGGGCGTTCC  
TATTGTAATGCATGACTACTTAACAGGGGGATTCACTGCAAATACTACCTTGTCTCATTATTGCCGAGATAATGGTCTAC  
TTCTTACATCCACCGTGAATGCACGCAGTTATTGATAGGCAGAAGAATCATGGTATGCACCTCC

*Triticum*

TCTAGGTTGGGGAGTAGGGCCAGGGGGAGAAGTTCTAGATACTCTTCCGTACTTTGTATCTGGCGTACTTCACCTAATTT  
CCTCCGCAGTCTTAGGCTTCGGTGGCATTATCACGCGCTTCTGGGACCCGAGACTCTTGAGGAATCTTTTCCATTCTTT  
GGTTATGTCTGGAAAGATAGAAATAAAATGACTACAATTTTGGGTACCCACTTAATTTTGTAGGCCTAGGTGCTTCTCT  
TCTAGTACTCAAGGCTCTTTATTTTGGCGGTGTATATGATACCTGGGCCCCCTGGGGGA---GGAGATG---  
TAAGAAAATTTACCAATTTGACCCCTTAGCCCTAAGTGTATATTTTGGTTATTTTCTTAAACCTCCTTTTGGTGGAGAAGGG  
TGAGTTTGTAGTGTAGATGATTTAGAAGATAGATTTGGTGGCATGTATGGTTGGGTTTT---  
ATTTGTGACTTGGCGGAATTTGGCATATTTTAACCACCCCTTCGCATGGGCTCGCCGTGCATTTGTATGGTGTGGAGA  
AGCTTACTTGTCTTATAGTTTAGCCGCTTTATCTGTCTTTGGTTTTATCGCTTGTGTTTTGTATGGTTCAATAATACAG  
CTTATCCGAGTGAGTTTTATGGACCCACCGGGCCAGAAGCTTCCCAAGCTCAAGCATTACTTTTCTAGTTAGAGACCAG  
CGTCTTGGAGCTAATGTGGGATCCGCCAAGGACCCACAGGTTTAGGTAAATATCTAATGCGTTCCCCAACTGGGGAGGT  
TATCTTTGGAGGGGAAACTATGCGTTTTTGGGACCTTCGTGCTCCATGGTTAGAACCCTTAAGGGGCCCAACGGTTTGG  
ACTTGAGTAGGTTGAAAAAAGACATACAA---  
CCTTGGCAAGAACGACGCTCAGCAGAATATATGACCCACGCTCCTTTAGGCTCTTTAAATTCGGTGGGTGGCGTAGCTAC  
CGAGATCAATGCAGTTAATTATGTTTCTCCTAGAAGTTGGTTAGCGTCTTCCCATTTTGTCTAGGATTCTTCTTTTTTG  
TGGGCCATTTTGGCATGCAGGAAGAGCCCGGGCTGCTGCAGCAGTTTTGAAAAGGGAATCGATCGTGATTTGGAACCT  
GTTCTTTACATGAACCCTCTTAAC-----  
ATGACTATAGCCCTTGGTAGAATTCCTAAAGAAGAA-----  
AATGATCTATTTGATACTATGGATGACTGGTTACGAAGGGACCGTTTTCGTTTTTGTAGGATGGTCTGGCCTATTGCTCTT  
TCCTTGTGCTTATTTGCTTTAGGGGGTGTGTTACAGGGACAACCTTTTGTAACTTCTTGGTATACCCATGGAGTGGCTA  
GTTCTTATTTGGAAGGTTGTAATTTCTTAACCGCAGCAGTTTCTACCCCTGCCAATAGTTTAGCACACTCTTTGTTGCTA  
CTATGGGGGGCCGAAGCACAAAGGAGATTTACTCGTTGGTGTCAATTAGGCGGTCTATGGACTTTTGTAGCTCTCCACGG  
GGCTTTTGCCTAATAGGTTTTCATGTTACGCCAATTTGAACTTGTCTGGTCTGTTCAATTGCGGCCTATAATGCAATCT  
CATTCTCTGGTCCAATTTGCTGTTTTTGTCTGTATTCTTATTTATCCACTGGGGCAATCTGGTTGGTTCTTTGCGCCG  
AGTTTTGGCGTAGCAGCGATATTTTCGATTCATCCTTTTCTTTCAAGGATTTTATAATTGGACGTTGAACCCATTTTATAT  
GATGGGAGTTGCCGGAGTATTAGGTGCGGCTCTGCTATGCGCTATTATGAGCGACCGTAGAAAACACTCTATTTGAGG  
ACGGTGATGGTGCAAATACCTTCCGTGCTTTTAAACCAACTCAAGCTGAAGAACTTATTCAATGGTCACTGCTAACCAGC  
TTTTGGTCCCAATCTTTGGTGTGCTTTTTCCAATAAACGTTGGTTACATTTCTTTATGCTATTTGTACCCGTCACCGG  
TTTATGGATGAGTGCTATTGGCGTAGTTGGCTTGGCTCTGAACTTACGTGCCTATGACTTTGTTTTCCAGGAAATCCGTG  
CAGCGGAAGATCCTGAATTTGAGACTTTCTACACCAAAAAATATTCTTTTAAACGAGGGTATTTCGTGCGTGGATGGCAGCT  
CAGGATCAGCCTCATGAAAATCTTATATTCCTGAGGAGGTTTACCACGTGGAAACGCTCTT---  
ATGTCTGGAAGCACGGGAGAACGTTCTTTTGTGATATTATTACCAGTATTCGATACTGGGTTATTCATAGCATTACTAT  
ACCTTCCCTATTCATTGCGGGATGGTTATTTGTGAGTACGGTTTTAGCTTATGACGTGTTTGGAAAGTCTTAGGCCAAACG  
AGTATTTACGGAAAGCCGACAAGGAATTCGGTTAATAACCGACCGTTTTGATTCTTTAGAACAACCTCGATGAATTTAGT  
AGATCCTTT---

ATGACCATAGATCGAACCTATCCTATTTTTACAGTGCATGGCTGGCTATTACGGACTAGCTGTACCTACTGTTTCCTT  
CTTGGGATCAATATCAGCAATGCAGTTCATCCAACGA-----  
ATGGCTACACAAACCGTTGAAGATAGT---TCT---AAACCTAGG-----  
CCAAAACAAACTGGTGCAGGTAGTTTACTGAAACCCCTTGAATTCGGAATATGGGAAAGTCGCCCGGGTTGGGGGACTAC  
TCCTTTTATGGGGGTCGCAATGGCTTTATTTCGCTATATTCTATCTATCATTTTAGAAATTTATAATTCTTCCGTTTTAC  
TGGACGGAATTTTAACCAAT-----  
ATGCTTACTCTCAAACCTTTTTGTTTTATACAGTAGTGATATTCTTTGTTTCACTCTTTATCTTTGGATTCTTATCTAATGA  
CCCAGGACGGAATCCTGGA---CGCGAGGAG-----  
ATGTCCGATACTACTGGAAGAATTCCTCTTTGTCTGATAGGTACTGTAGCCGGTATTGCTGTGATTGGTTTTAGTAGGTGT  
TTTCTTTTATGGTTCATATTCTGGATTGGGTTTCATCTCTA-----ATGCCT-----  
AATATACTTAGTTTAACTGTATTTGTTTTAATTTCTGTTATT---TATCCG-----  
ACTAGTTTTTTCTTCGCCAAATTCGCCAAGCTTATGCCATTTTCAATCCAATCGTGGATTTTTATGCCTGTCATACCTCT  
ATTCTTTTTTCTATTAGCCTTTGTTTGGCAAGCTGCTGTAAGTTTTTCGA---ATGACACAATCA-----  
AACCCGAATGAACAAAATGTTGAATTGAATCGTACCAGTCTATACTGGGGTTTTATTACTCATTTTTTGTACCTGCTGTTTT  
ATTTGCCAATTACTTCTTCAAT---ATG---  
GAAGTCAATATTCTCGCATTATTGCTACTGCCTGTTTCTTAGTTTCTACTTCTTTTTTACTTATTATTTATGTAAA  
AACAGTCAGCCAAAAT-----AAT-----  
ATGGAAACAGCAACTTTAGTCGCCATCTCCATATCTGGTTTTACTTGTAAAGCTTTACTGGGTATGCCTTATATACCGCGTT  
TGGGCAA---CCCTCTCAACAATTAAGAGATCCATTTCGAAGAACACGGAGAC---  
ATGGAAGCATTGGTTTTATACGTTCTTTTAGTTTCGACTTTAGGGATAATTTTTTTCGCTATCTTCTCCGAGAACCACC  
TAAGGTTCCA-----  
ATGACTATTGCTTTCCAATTAGCTGTTTTTGCATTAATTGCGACTTCCCTCAGTCTTAGTAATTAGTGTACCCCTTGTATT  
TGCTTCTCCTGATGGTTGGTCAAATAATAAAAATGTTGTATTTCTGGTACATCATTATGGATTGGACTAGTCTTTCTCG  
TAGCTATTCTGAATTCTCTCATTCT---  
ATGTCACCACAAACAGAACTAAAGCAGGTGTTGGATTTAAAGCTGGTGTAAAGATTATAAATTGACTTACTACACCCC  
AGAGTATGAAACTAAGGATACTGATATCTTGGCAGCATTCCGAGTAAGTCCTCAGCCTGGGGTTCCGCCCGAAGAAGCAG  
GGGCTGCAGTAGCTGCCGAATCTTCTACTGGTACATGGACAACGTTTGGACTGATGGACTTACCAGTCTTGATCGTTAC  
AAAGGACGATGCTATCACATCGAGCCTGTTGCTGGGGAAGCAGCCAATGGATCTGTTATGTAGCTTATCCATTAGACCT  
ATTTGAAGAGGGTTCCGTTACTAACATGTTTTACTTCCATTGTAGGTAACGTATTTGGTTTTCAAAGCCCTACGTGCTCTAC  
GTTTGGAGGACTACGAATTCCTTACTTATTCAAAAACCTTTCCAAGGCCCGCCTCATGGTATCCAAGTTGAAAGAGAT  
AAGTTGAACAAGTATGGTCGTCCTTTATTGGGATGTACTATTAACCAAAAATTGGGATTATCCGCAAAAAAATTATGGTAG  
AGCGTGTATGAGTGTCTACGTGGTGGACTTGATTTTACCAAAGATGATGAAAACGTAAACTCACAACCATTTATGCGCT  
GGAGAGACCGTTTTGTCTTTTGTGCCGAAGCTATTTATAAATCACAGGCCGAAACCGGTGAAATCAAG-----  
GGGCATTACTTGAATGCGACTGCGGGTACATGTGAAGAAATGATTAAGAGAGCTGTATTTGCAAGAGAATTAGGGGTTCC  
TATTGTAATGCATGACTACTTAACTGGGGGATTACCAGCAATACTACTTTGGCTCATTATTGCCGCGACAATGGCCTAC  
TTCTTACATTCACCGTGCAATGCATGCAGTTATTGATAGACAGAAAAATCATGGTATGCATTTCC

Typha

TCTAGGTTGGGGGGTAGGTCCGGGGGAGAAGTTATAGACACCTTTCCATACTTTGTATCTGGAGTACTTCACTTAATTT  
CCTCCGAGTCTTAGGCTTTGGCGGTATTTATCATGCCCTTCTTGGACCTGAGACTCTTGAAGAATCTTTTCCATTCTTC  
GGTTATGTATGGAAAGATAGAAATAAAATGACTACAATTTTGGGTATTCACTTAATTTTGTAGGTATAGGTGCTTTTCT  
TCTAGTATTCAAAGCTCTTTATTTTGGGGGTGTATATGATACCTGGGCCCCAGGGGGG---GGAGATG---  
TAAGAAAAATTACCAACTTGACCCTTAGCCCAAGTGTTATATTTGGTTATTTACTAAAATCTCCTTTTGGAGGAGAAGGA  
TGGATTGTTAGTGTGGACGATTTAGAAGATATAATTGGGGGACATGTATGGTTAGGTTCC---  
ATTTGTATATTTGGTGGAAATTTGGCATACTTAAACCAACCCTTCGCATGGGCTCGCCGTGCATTTGTATGGTCTGGAGA  
GGCTTACTTGTCTTATAGTTTACTGCTTTATCTGTCTTTGGTTTCATCGCTTGTGTGTTTCGTCTGGTTCAATAATACCG  
CTTATCCTAGTGAGTTTTACGGACCTACCGGGCCAGAAGCTTCTCAAGCTCAAGCATTACTTTTCTAGTTAGAGACCAA  
CGCCTTGGAGCTAATGTTGGATCCGCCCAAGGACCTACTGGTTTAGGTAAATATCTAATGCGTTCCCGACTGGAGAGGT  
TATTTTTGGAGGAGAAGCTATGCGTTTTTGGGATCTTTCGTGCTCCCTGGTTAGAACCCTCTAAGGGGTCCCAATGGTTTTGG  
ACTTGAGTAGGCTGAAAAAAGACATACAA---  
CCTTGGCAAGAACGACGTTCCGGCAGAATATATGACTCATGCTCCTTTAGGTTCTTTAAATTCGGTGGGTGGCGTAGCTAC  
CGAGATCAATGCAGTTAATTATGTCTCTCCTAGAAGTTGGTTAGCGACCTCTCATTTTGTTCTAGGATTCTTCCCTATTTG  
TGGGTCATTTGTGGCATGCGGGAAGGGCCCGTGCAGCTGCAGCGGGGTTTGA AAAAAGGAATCGATCGCGATTTGGAACCT  
GTTCTTTCCATGACCCTCTTAAC-----  
ATGACTATAGCTCTTGGTAGATTTACCAAAGAAGAA-----  
AATGATCTATTTGATATTATGGATGACTGGTTACGGAGGGACCCTTTCGTTTTTGTAGGCTGGTCAGGCCTATTACTCTT  
TCCTTGTGCTTATTTTCGCTTTAGGAGGTTGGTTTACAGGTACAACCTTTTGTAACTCATGGTATACCCATGGATTGGCCA  
GTTCTTATTTGGAAGGTTGCAATTTCTTAAACCGCTGCAGTTTCTACTCCTGCGAATAGTTTACACATTCTTTGTTGCTA

CTATGGGGCCCTGAAGCCCAAGGAGATTTTACTCGTTGGTGTCAATTAGGCGGTCTGTGGACTTTTGTGCTCTCCATGG  
CGCTTTTCGGACTAATAGGTTTTATGTTACGTCAATTCGAACCTTGCTCGATCTGTTCAATTGCGACCTTATAATGCAATCG  
CATTCTCTGGGCCAATCGCTGTTTTTGTCTGTATTCTGATTTATCCACTGGGTCAATCTGGTTGGTTTTTTCGCGCT  
AGTTTTGGGGTAGCAGCTATATTTTCGATTCATCCTCTTCTTCCAAGGATTTTCATAATTGGACGTTGAACCCATTTTCATAT  
GATGGGAGTTGCCGGAGTATTAGGCGCGGCTCTGCTATGCGCTATTCATGGTGCTACCGTAGAAAACACTTTTATTCGAAG  
ATGGTGACGGTGCAAATACATTCCGTGCTTTTAAACCAACTCAAGCCGAAGAGACTTATTCAATGGTCACTGCTAACCGC  
TTTTGGTCGCAAATCTTTGGGGTTGCTTTTTCCAATAAACGTTGGTTACATTTCTTTATGCTATTTGTACCAGTAACCGG  
TTTATGGATGAGTGCTATTGGGGTAGTCGGTCTGGCTCTGAACCTACGTGCCTATGATTTTCGTTTTCCAAGAAATCCGTG  
CAGCGGAAGATCCTGAATTTGAGACTTTCTACACCAAAAAATATTCTTTTAAACGAAGGATTCGTGCTTGGATGGCAGCT  
CAGGATCAGCCTCATGAAAACCTTATATCCCTGAGGAGGTTCTACCACGTGGAACGCTCTT---  
ATGTCTGGAAGCAGGGAGAACGTTCTTTTGTGATATTATTACCAGTATTCGATACTGGGTTATTTCATAGCATTACTAT  
ACCTTCCCTATTTCATTCGCGGTTGGTTATTTCGTGACGACGGGTTAGCTTACGACGTGTTTGAAGTCCTCGTCCAAACG  
AGTATTTACGGAAAGCCGACAAGGGATTCATTGATAACCGGCCGTTTTGATTCTTTGGAACAACCTCGATGAATTTAGT  
AGATCCTTT---  
ATGACCATAGATCGAACTTATCCAATTTTTACAGTGCGATGGTTGGCTGTTACCGACTAGCTGTACCTACCGTTTCTTT  
TTTGGGGTCAATATCAGCAATGCAGTTCATCCAACGA-----  
ATGGCTACACAAACCGTAGAGGATAGT---TCT---  
AGATCTGGGGCAAGGCCAAGACGAACTAATGTAGGGAGTTTTATTGAAACCATTGAATTCAGAATATGGTAAAGTAGCTCC  
GGGCTGGGGGACTACACCCTTATGGGAGTCGCAATGGCTCTATTTGCGATATTCCTATCTATTATTTTGGAAATTTATA  
ACTCTTCTGTTTTACTGGATGGAATTGCTATGAT-----GATCTT-----  
GGAGATTGTGTAATGCTTACTCTCAAACCTTTTGTTTACACAGTAGTGATATTCTTTGTTTCCCTATTTATTTTCGGATT  
CTTATCTAATGATCCAGGACGTAATCCTGGA---CGTGAGGAA-----  
ATGGCCGATACTACTGGAAGGATTCCTCTTTGGCTGATAGGTACTGTAACCTGGTATTCCTGTGATCGGTTTAAATAGGTGT  
TTTCTTTTACGGTTCATATTCGGGTTGGGTTTCATCTCTC-----ATGCTT-----  
AATATCTTTAGTTAATCTGTATCTGTCTTAATTCTGCCCTT---TATTCA-----  
AGTAGTTTTTTCTTTGCCAAATTGCCCGAAGCTTATGCCATTTTCAATCCAATCGTAGATGTTATGCCTGTCATACCTCT  
ATTCTTTTTTCTCTTAGCCTTTGTTTGGCAAGCTGCTGTAAGTTTTCGA---ATGACACAATCA-----  
AACCCGAATGAACAAAGTGTGAATTGAATCGTACCAGTCTATACTGGGGTTTATTACTCATTTTTGTACTTGCTGTTTT  
ATTTTCCAATTTTCTTCAAT---ATG---  
GAAGTCAATATTCTAGCATTATTGTCTACTGCACTGTTTCATTCTAGTTTCTACTGCTTTTTTACTTATTATCTACGTAAA  
AACAGTCAGTCAAAAT-----GAT-----  
ATGGAAACAGCAACCCTAGTCGCCATCTCCATATCTGGTTTACTTGTAAAGCTTTACTGGGTACGCCTTATATACCGCTTT  
TGGGCAA---CCCTCTCAACAATAAGAGATCCATTGGAAGAACACGGGGAC---  
ATGGAAGCATTGGTTTATACATTCCTTTTAGTCTCGACTTTAGGGATAATTTTTTTTCGCTATCTTTTTTTCGAGAACCCCC  
TAAGGTTCCG-----ACTAAAAA-----  
ATGACTATTGCTTTCCAATTAGCTGTTTTTGCATTAATTGCGACTTCATCAGTCTTACTGATTAGTGTACCCGTTGTATT  
TGCTTCTCCTGATGGTTGGTCAAGTAACAAAAATGTTGTATTTCCGGTACATCTTTATGGATTGGATTAGTCTTTCTGG  
TAGCTATTCTTAATTCATTAATTTCT---  
ATGTCACCACAAACAGAGACTAAAGCAAGTGCTGGATTTAAAGCTGGTGTAAAGATTACAAATTGACTTATTATACTCC  
TGAATACGAAACCAAGGATACTGATATCTTGGCAGCATTTCGAGTAACCTCCTCAACCTGGAGTTCCGCTGAAGAAGCAG  
GGGCTGCGGTAGCTGCCGAATCTTCTACTGGTACATGGACAACCTGTTGGACTGATGGACTTACGAGTCTTGATCGTTAC  
AAAGGACGATGCTACCACATCGAGCCTGTTGTTGGGGAAGAAAATCAATATATTGCTTATGTAGCTTATCCTTTAGACCT  
TTTTGAAGAAGGTTCTGTTACTAACATGTTTACTTCCATTGTAGGTAATGTATTTGGGTTCAAAGCCCTACGAGCTCTAC  
GTCTGGAGGATCTGCGAATTCCTTCTTATTCAAAAACCTTTCCAGGGCCCGCTCATGGTATCCAAGTTGAAAGAGAT  
AAGTTGAACAAGTATGGTTCGTCCTTATTGGGATGTACTATTAACCTAAATTTGGGATTATCCGCAAAGAACACTACGGTAG  
GGCGGTTTATGAATGTCTACGCGGTGGACTTGATTTTACCAAAGATGATGAAAACGTGAACCTCACAACCATTTCATGCGTT  
GGAGAGACCCTTTCTATTTTTGTGCCGAAGCTATTTTATAAAGCGCAGGCCGAAACGGGTGAAATCAA-----  
GGACATTACTTGAATGCTACTGCGGGTACATGTGAAGAAATGATGAAAAGGGCTATATTTGCCAGAGAATTGGGAGTTCC  
TATCGTAATGCATGACTACTTAACTGGGGGATTCACTGCAAATACTAGTTTGGCTCATTATTGTGCGGATAATGGTCTAC  
TTCTTACATCCACCGCGCAATGCATGCAGTTATTGATAGACAGAAAAATCATGGTATGCATTTTC

Vitis

TCTAGGTTGGGGGGTAGGTCCTGGTGGGGAAGTTATAGACACCTTTCCATACTTTGTATCTGGAGTACTTCACTTAATTT  
CCTCCGCAGTATTGGGCTTTGGCGGTATTTATCATGCACTTCTGGGACCTGAGACTCTTGAAGAATCTTTTCCATTTTTC  
GGTTATGTATGGAAAGATAGAAATAAAATGACCACAATTTTGGGTATTCATTAATCTTGTAGGTATAGGTGCTTTTCT  
TCTAGTATTCAAGGCTCTTTATTTTTGGCGCGTATATGATACCTGGGCTCCCGGAGGG---GGAGATG---  
TAAGAAAAATTACCAACTTGACCCTTAGCCCAAGTGTTATATTTGGTTATTTACTAAAATCGCCCTTTGGAGGAGAAGGA  
TGGATTGTTAGTGTGGACGATTTGGAAGATATAATTGGAGGACATGTATGGTTAGGTTCC---



ATTTGTATATTTGGTGGAACTCTGGCATATCTTAACCAAACCCTTTGCGTGGGCTCGCCGTGCACTTGTATGGTCTGGAGA  
GGCTTACTTGTCTTATAGTTTGGTGTCTTTAGCTGTCTTTGGTTTTATTGCTTGTGGCTTTGTCTGGTTCAATAATACCG  
CTTATCCTAGTGAGTTTTACGGGCCAACTGGACCCGAAGCGTCTCAAGCTCAAGCATTACTTTTTCTAGTTAGAGACCAG  
CGTCTTGGGGCTAACGTGGGATCCGCTCAAGGACCTACTGGTTTAGGTAAATATCTAATGCGTTCCCCGACTGGAGAAGT  
CATTTTTGGAGGAGAACTATGCGTTTTTGGGATCTGCGTGTCCCTGGTTAGAACCTCTAAGGGGTCCCAATGGTTTGG  
ACTTGAGTAGGCTGAAAAAAGACATACAA---  
CCTTGGCAAGAACGGCGTTCGCGGGAATATATGACTCACGCTCCTTTAGGTTCTTTAAATTCGGTGGGTGGCGTAGCTAC  
CGAGATCAATGCAGTCAATTATGTCTCTCCTAGAAGTTGGTTAGCTACTTCTCATTGTTCTAGGATTCTTCCTATTTCG  
TAGGTCATTTGTGGCACGCGGGAAGGGCTCGTGCAGCTGCAGCAGGATTTGAAAAAGGAATTGATCGTGATTTTGAACCT  
GTTCTTTCTATGACCCCTCTTAAC-----  
ATGACTATAGCCCTTGGTAAATTCACCAAAGACGAA-----  
AGCGATTTATTTGATATTATGGATGACTGGTTACGGAGGGACCGTTTTCGTTTTTGTAGGTTGGTCCGGTCTATTGCTCTT  
TCCTTGTGCCTATTTGCTTTGGGGGGTTGGTTACAGGTACAACCTTTGTAACCTTCATGGTATACCCATGGATTGGCTA  
GTTCTTATTTGGAAGGTTGCAATTTCTTAACCGCCGAGTTTCTACCCCTGCTAATAGTTTAGCACATTCTTTATTGTTA  
CTATGGGGTCTGAAGCACAAGGAGATTTACTCGTTGGTGTCAATTAGGTGGTCTGTGGACTTTTGTGCTCTTCATGG  
CGCTTTCGGACTAATAGGTTTCATGTTACGTCAATTCGAACCTTGCTCGATCTGTTCAATTGCGACCTTATAATGCAATCG  
CATTCTCTGCTCCAATCGCTGTTTTTGTGTTCTGTATTCTAATTTATCCACTAGGTGAGTCTGGTTGGTTCTTTGCGCCT  
AGTTTTGGTGTAGCAGCTATATTTGATTTCATCCTCTTTTTCCAAGGGTTTCATAATTGGACGTTGAACCCATTTTCATAT  
GATGGGAGTTGCCGGTGTATTGGGCGCTGCTCTGCTATGCGCTATTTCATGGTGTACCCGTAGAAAATACTTTATTTGAAG  
ATGGTGTAGGTGCAAATACATTCCGGGCTTTAATCCAACCTCAAGCTGAAGAACTTATTCAATGGTCACCGCTAACCGC  
TTTTGGTCCCAAATCTTTGGGGTTGCTTTTTCCAATAAACGTTGGTTACATTTCTTTATGTTATTTGTACCAGTAACCGG  
TTTATGGATGAGTGTCTTTGGAGTAGTCGGTCTGGCTCTGAACTTACGTGCCTATGACTTCGTTTCCAGGAAATCCGTG  
CAGCGGAAGATCCTGAATTTGAGACTTTCTACACCAAAAATATTCTCTTAAACGAAGGTATTTCGTGCTTGGATGGCGGCT  
CAAGATCAGCCTCATGAAAACCTTATATCCCTGAGGAGGTTTCTACCCCGTGGAAACGCTCTT---  
ATGTCTGGAAGCACAGGAGAACGTTCTTTGCTGATATTATTACCAGTATTCGATACTGGGTCAATTCATAGCATTACTAT  
ACCTTCCCTATTTCATGCGGGTTGGTTATTTCGTGAGCAGGGTTTAGCTTACGATGTGTTTGGAAAGTCCCTCGGCCAAACG  
AGTATTTTACAGAGAGCCGACAAGGAATCCATTAATAACCGGCCGTTTTGATCCTTTGGAACAACCTCGATGAATTTAGT  
AGATCTTTT---  
ATGACCATAGATCGAACCTATCCAATTTTTACAGTGCAGTGGTTGGCTGTTACGGACTAGCTGTACCTACCGTTTCTTT  
TTTGGGGTCAATATCAGCAATGCAGTTTCATCCAACGA---  
ATGAATACAATAGGATTTATGGCTACAAAAACCGTTGAGGGTAGT---TCT---AGATCTCGT-----  
CCAAAACCAACTACTGTAGGGGAGTTATTAATAACCGTTGAATTCGGAATATGGTAAAGTAGCTCCTGGATGGGGAACTAC  
TCCTTTAATGGGTGTGCAATGGCTCTATTTGCGGTATTCTATCTATTATTTTGGAGATTTATAATTCTTCTGTTTTAT  
TGGACGGAATTTCACTGAAT-----  
ATGCTTACTCTCAAACCTCTCGTTTTACACAGTAGTGATATTCTTTGTTTTCTCTCTTCATCTTCGGATTCCCTATCTAATGA  
TCCGGGACGTAATCCTGGG---CGTGAAGAA-----  
ATGGCCGATACTACTGGAAGGATTCCCTCTTTGGCTAATAGGTACTGTAACCTGGTATTCTGTGATCGGTTTAAATAGGCAT  
TTTCTTTTATGGTTTCATATTCCGGATTGGGTTTCATCCCTG-----ATGCTT-----  
AATATCTTTAGTTTGTATCTGTCTTAATTCTGCCCTT---TATTG-----  
AGTAATTTTTCTTCGCCAAATTGCCCGAAGCCTATGCTTTTTTGAATCCAATCGTAGATGTTATGCCAGTCATACCTCT  
GTTCTTTTTCTCTTAGCCTTTGTTTGGCAAGCCGCTGTAAGTTTTTGA---ACGACACAATCA-----  
AACCCGAACGAACAAAATGTTGAATTGAATCGTACCAGTCTTTACTGGGGGTTATTACTCATTTTTGTACTTGTGTTTT  
ATTTTCCAATTATTTTTTCAAT---ATG---  
GAAGTAAATATTCTCGCATTATTGCTACTGCCTGTTTACTTCTAGTTCCCTACTGCTTTTTTACTTATCATTACGTAAA  
AACAGTTAGTCAAAAT-----AAT-----  
ATGGAACAGCAACCCCTAGTCGCCATCTATATCTGGTTTACTTGTAAAGTTTTACTGGGTACGCCTTATATAACGCCTT  
TGGGCAG---CCCTCTCAACAACCTAAGAGATCCATTTGAGGAACACGGGGAC---  
ATGGAAGCATTGGTTTATACATTCTCTTAGTCTCGACTCTAGGGATAATTTTTTTCGCTATCTTTTTTTCGAGAACC  
TAAAGTTCCA-----ACTAAAAAGGTGAAA---  
ATGACTATTGCTTTCCAATTGGCTGTTTTTGCATTAATTGCTACTTTCATCAATCTTACTGATTAGTGTACCCGTTGTATT  
TGCTTCTCCTGATGGTTGGTCAAGTAACAAAAATATTGTTTTTCCGGTACATCATTATGGATTGGATTAGTCTTTCTGG  
TAGGTATACTTAATTCTCTCATCTCT---  
ATGTCACCACAAACAGAGACTAAAGCAAGTGTGGATTCAAAGCCGGTGTAAAGATTACAAATTGACTTATTATACTCC  
TGAATATGAGACCAAACCTACTGATATCTTGGCAGCATTCCGAGTAACTCCTCAACCTGGAGTTCCACCCGAAGAAGCAG  
GGGCCGCGGTAGCTGCTGAATCTTCTACTGGTACATGGACAACCTGTGTGGACTGATGGACTTACCAGCCTTGATCGTTAC  
AAAGGACGATGCTACCACATCGAGCCCCTTGGTGGAGAAGAAAGTCAATTTATTGCTTATGTAGCTTACCCTTTAGACCT  
TTTTGAAGAAGGCTCTGTTACTAACATGTTTACTTCCATTGTGGGTAATGTGTTTGGGTTCAAAGCTCTGCGCGCTCTAC

GTCTAGAGGATCTGCGAATCCCCCTGCTTATTCTAAAACCTTTCCAAGGCCCGCCTCATGGCATCCAAGTTGAGAGAGAT  
AAATTGAACAAGTATGGTCGTCCCCTATTGGGATGTACTATTAACCTAAATTGGGGTTATCCGCTAAGAACTATGGTAG  
AGCAGTTTATGAATGTCTCCGCGGTGGACTTGATTTTACTAAAGATGATGAGAACGTGAACTCCCAACCATTTATGCGTT  
GGAGAGACCGTTTTCTTATTTTTGTGCCGAAGCCATTTTTAAATCACAGGCTGAAACAGGTGAAATCAAA-----  
GGGCATTACTTGAATGCTACTGCAGGTACATGCGAAGAAATGATCAAAAGGGCTGTATTTGCCAGAGAATTGGGAGTTCC  
TATCGTAATGCATGACTACTTAACAGGGGGATTACCCGCAAATACTAGCTTGGCTCATTATTGCCGAGATAATGGCCTAC  
TTCTTCACATCCATCGTGCAATGCATGCAGTTATTGATAGACAGAAGAATCATGGTATGCACCTTC

Yucca

TCTAGGTTGGGGGGTAGGCCCGGGGGGGGAAGTTATAGACACCTTTCCATACTTTGTATCTGGAGTACTTCACTTAATTT  
CCTCTGCAGTCTTAGGCTTTGGTGGTATTTATCACGCGCTTCTTGGACCCGAGACTCTTGAGGAATCCTTTCCATTCTTC  
GTTTATGTATGGAAAGATAGAAAATAAAATGACTACAATTTTGGGTATTCACTTAATTTTGTAGGTATAGGTGCTTTTCT  
TCTAGTACTTAAGGCTCTTTATTTTTGGGGGTGTATATGATACCTGGGCCCCAGGGGGG---GGAGATG---  
TAAGAAAAATTACCAACTTGACTCTTAGCCCAAGTGTTATATTTGGTTATTTACTAAAATCTCCTTTTGGGGGAGAAGGA  
TGGATTGTTAGTGTGGACGATTTAGAAGATATAATTGGAGGACATGTATGGTTAGGTTCC---  
ATTTGTATATTTGGTGGAAATTTGGCATATTTAACCAAACCCTTTGCATGGGCTCGCCGTGCATTTGTATGGTCTGGAGA  
GGCTTACTTGTCTTATAGTTTGGCTGCTTTATCTGTCTTTGGTTTCATCGCTTGTGTTCGTCTGGTTCAATAATACCG  
CTTATCCTAGTGAGTTTTACGGACCCACCGGACCAGAAGCTTCTCAAGCTCAAGCATTACTTTTTCTAGTTAGAGACCAA  
CGTCTTGGGGCCAACGTGGGATCCGCTCAAGGACCTACCGGTTTAGGTAAATATCTAATGCGTTCCCCACTGGAGAGGT  
TATTTTTGGAGGAGAACTATGCGTTTTTGGGATCTCCGTGCTCCCTGGTTAGAACCTCTAAGGGGTCCCAATGGTTTGG  
ACTTGAGTAGGCTGAAAAAAGATATACAA---  
CCTTGGCAAGAACGACGTTCCGGCAGAATATATGACTCATGCTCCTTTAGGTTCTTTAAATTCGGTAGGTGGCGTAGCTAC  
CGAGATCAATGCAGTCAATTATGTCTCTCCTAGAAGTTGGTTAGCCACTTCTCATTTTGTTCTAGGATTCTTCCTATTTG  
TGGGTCATTTGTGGCATGCAGGAAGAGCCCGTGCAGCTGCTGCAGGATTTGAAAAAGGAATCGATCGTGATTTGGAACCC  
GTTCTTTCCATGACCCCTCTTAGC-----

ATGACTATAGCTCTTGGTAAATTTGCCAAAGAAGAA-----

AATGATTTATTTGATATTATGGATGATTGGTTACGGAGAGACCGTTTTCGTTTTGTAGGTTGGTCCGGCCTATTGCTCTT  
TCCTTGTGCTTATTTTCGCTTTGGGGGGCTGGTTTACGGGTACAACCTTTGTAACCTCGTGGTATAACCCATGGATTGGCCA  
GTTCTATTTTGAAGTTGTAATTTCTTAACCGCTGCAGTTTCTACCCCTGCGAATAGTTTAGCACATTTCTTTGTGTGTTA  
CTATGGGGCCCTGAAGCACAAGGAGATTTTACTCGTTGGTGTCAATTAGGGGGGCTGTGGACTTTTGTGTCTCCATGG  
TGCTTTTCGACTAATAGTTTTCATGTTACGCCAGTTTCAACTTGTCTCGATCTGTTCAACTGCGACCTTATAATGCAATCG  
CATTCTCTGGTCCAATTGCGGTTTTTGTCTGTATTCTGATTTATCCACTGGGTCAATCTGGTTGGTTCTTTGCGCCC  
AGTTTTGGTGTAGCAGCTATATTTTCGATTCATCCTCTTCTTCCAAGGGTTTTATAATTGGACGTTGAACCCATTTTCATAT  
GATGGGAGTTGCCGGAGTATTAGGCGCTGCTCTGCTATGCGCTATTCATGGTGTCTACCGTGGAAAATACTTTATTCGAAG  
ATGGTGACGGTGCAAATACATTCCGTGCTTTTAAACCAACTCAAGCCGAAGAGACTTATTCAATGGTCACTGCTAACC GC  
TTTTGGTCCCAAATCTTTGGGGTTGCTTTTTCCAATAAACGTTGGTTACATTTCTTTATGTTATTTGTACCAGTAACCGG  
TTTATGGATGAGTGTCTTTGGGGTAGTCGGTCTGGCTTTGAACCTACGTGCCTATGACTTTGTTTCCAAGAAATCCGCG  
CAGCGGAAGATCCTGAATTTGAGACTTTCTACACCAAAAATATTCTCTTAAACGAAGGTATTTCGTGCTTGGATGGCGGCT  
CAGGATCAGCCTCATGAAAACCTTATATCCCTGAGGAGGTTTCTACCCCGTGGAAACGCTCTT---  
ATGTCTGGAAGCACGGGAGAACGTTCTTTTGTGATATTATTACCAGTATTCGATACTGGGTCAATTCATAGCATTACTAT  
ACCTTCCCTATTCATTGCGGGTTGGTTATTTCGTGAGTACAGGTTTAGCTTACGATGTATTCCGAAGTCCCTCGGCCGAACG  
AGTATTTACAGAGAGCCGACAGGGGATTCCATTAATAACCGGCCGTTTTGATTCTTTGGAACAACCTCGATGAATTTAGT  
AGATCCTTT---

ATGACCATAGATCGAACCTATCCGATTTTTACAGTGCATGGTTAGCTGTTTACGGACTAGCTGTACCTACCGTTTCTTT  
TTTGGGGTCAATATCAGCAATGCAGTTCATCCAACGA-----

ATAAGATTTATGGCTACACAAACCGTTGAGGGTAGT---TCT---AGATCTAGA-----

CCAAGACAAACTACCGTAGGGAATTTATTGAAACCATTAAATTCGGAATATGGTAAAGTAGCTCCGGGCTGGGGGACTAC  
ACCCTTATGGGAGTCGCAATGGCTCTATTTGCGATATTCCTATCTATTATTTTGGAAATTTATAATTTCTTCCGTTTTAC  
TGGATGGAATTTTCATGAGT-----

GGAGATTGTGTAATGCTTACTCTCAAACCTCTCGTTTTACACAGTAGTGATATTTTTTGTCTCTGTTTCATCTTCGGATT  
CTTATCTAACGATCCGGGCCGTAATCCTGGA---CGTGAGGAA-----

ATGGCCGATACTACTGGAAGGATTCTCTTTGGCTGATAGGTACTGTAACCTGGTATTCTGTGATCGGTTTAAATAGGTAT  
TTTCTTTTACGGTTCATATTCCGGGTTGGGTTTCATCTCTG-----ATGCTT-----

AATATCTTTAGTTTAAATCTGTATCTGTCTTAATTCTACCCTT---TATTG-----

AGTAGTTTTTTCTTCGCCAAACTGCCGAGGCTTATGCCTTTTTCAATCCCATCGTGGATGTTATGCCTGTCATACCTAT  
ACTATTTTTTCTTCTTAGCCTTTGTTTGGCAAGCCGCTGTAAGTTTTTCA---ATGACACAATCA-----

AACCCGAATGAACAAAATGTTGAATTGAATCGTACCAGTTTATACTGGGGTTTTATTACTCATTTTTGTACTTGGCTGTTTT  
ATTTTCCAATTTTCTTCAAT---ATG---

GAAGTCAATATTCTCGCACTTATTGCTACTGCACTGTTTCATTCTAGTTCCTACTGCTTTTTTACTTATCATCTATGTAAA  
AACAGTTAGTCAAAAT-----GAT-----  
ATGGAAACAGCAACTCTAGTCGCCATCTTCATATCTGGTTTACTTGTAAAGCTTTACGGGGTATGCCTTATATACCGCTTT  
TGGGCAA---CCCTCTCAACAACCTAAGAGATCCATTTCGAGGAACACGGGGAC---  
ATGGAAGCATTGGTTTATACATTCTTTTAGTCTCGACTTTAGGGATAATTTTTTTTCGCTATCTTTTTTCGAGAACCGCC  
TAAGGTTCCG-----ACTAAAAA-----  
ATGACTATTGCTTTCCAATTAGCTGTTTTTGCATTAATTGCGACTTCATCAATCTTACTGATTAGTGTACCCGTTGTATT  
TGCTTCTTCTGATGGTTGGTCAAGTAACAAAAATGTTGTATTTCCGGTACATCATTATGGATTGGATTAGTCTTTCTGG  
TAGCTATCCTTAATTCTCTCATCTCT---  
ATGTCACCACAAACAGAGACTAAAGCAAGTGTGGATTTAAAGCTGGTGTAAAGATTACAGATTGACTTATTATACTCC  
TGATTACGAAACCAAAGATACTGATATCTTGGCAGCATTCCGAGTAACTCCTCAACCTGGGGTTCCCCCTGAAGAGGCAG  
GGCTGCGGTAGCTGCGGAATCTTCTACTGGTACATGGACAACCTGTGTGGACTGATGGACTTACCAGTCTTGATCGTTAC  
AAAGGACGATGCTACCACATTGAGGCCGTTGTTGGGGAAGAAAATCAATACATTGCTTATGTAGCTTATCCTTTAGACCT  
TTTTGAAGAAGGTTCTGTTACTAACATGTTTACTTCCATTGTAGGTAATGTATTTGGTTTCAAAGCCCTACGAGCTCTAC  
GTCTGGAGGATCTGCGAATTCCCCCTGCTTATTCCAAAACCTTTCCAAGGCCCGCCTCACGGCATCCAAGTTGAAAGAGAT  
AAATTGAACAAATATGGTTCGTCCTTATTGGGATGTACTATTAACCAAATTTGGGATTATCTGCAAAAAACTACGGTAG  
AGCGGTTTTATGAATGTCTACGCGGTGGGCTTGATTTTACCAAGGATGATGAAAACGTGAACTCACAGCCTTTTTATGCGCT  
GGAGAGACCGTTTTCGTATTTTGTGCTGAAGCAATTTATAAAGCACAAAGCCGAAACAGGCGAAATCAA-----  
GGACATTACTTGAATGCAACTGCAGGTACATGTGAAGAAATGATCAAAAGGGCCGATTTGCCAGAGAATTAGGAGTTCC  
TATCGTAATGCATGACTACTTAACTGGGGGATTCACTGCAAATACTAGTTTGGCTCATTATTGCCGCGACAACGGTTTAC  
TTCTTCATATCCACCGCGCAATGCATGCAGTTATTGATAGACAGAAAAATCATGGTATGCATTTTC

Zea

TCTAGGTTGGGGAGTAGGGTCGGGGGGGAGAAGTTCTAGATACTTTTCCTTACTTTGTATCCGGAGTACTTCACTTAATTT  
CCTCCGCAGTCTTAGGCTTCGGTGGCATTATACACGCGCTTCTGGGACCCGAGACTCTTGAAGAATCTTTTCCATTCTTT  
GGTTATGTATGGCAAGATAGAAATAAAATGACTACACTTTTGGGTATTCACTTAATTTTGTAGGTCTAGGTGCTTTTCT  
TCTAGTACTCAAGGCTCTTTATTTTGGCGGCGTATATGATACCTGGGCCCGGGGGG---GGGGATG---  
TAAGAAAAATTACCAATTTGACCCCTAGCCCCGGTGTATATTTGGTTATTTACTAAAATCCCCTTTTGGGGGAGAAGGA  
TGGATTGTTAGTGTGGATGATTTAGAAGATATAAATGGGGGACATGTATGGTTGGGTTCC---  
ATTTGTGTACTTGGCGGAATTTGGCATACTTAACCAAACCTTTGCATGGGCTCGCCGTGCATTTGTATGGTCTGGCGA  
AGCTTACTTGTCTTATAGTTTGGTGTCTTATCTGTTTTTGGTTTTATCGCTTGTGTTTTGTCTGGTTCAATAATACGG  
CTTATCCAAGTGAGTTTTACGGGCCACTGGACCAGAAGCTTCTCAAGCTCAAGCATTACTTTTTCTAGTTAGAGACCAG  
CGTCTTGGAGCTAATGTAGGGTCTGCCAAGGACCGACGGGTTAGGTAAATATCTAATGCGTTCCCCAACGGGAGAGGT  
TATTTTTGGAGGGGAAACTATGCGTTTTTGGGACCTTCGTGCTCCGTGGTTAGAACCCTTAAGGGCCCCAACGGTTTGG  
ACTTGAGTAGGTTGAAGAAAGACGGCCAA---  
CCTTGGCAAGAACGACGTTTCCAGGAGAATATATGACCCATGCTCCTTTAGGCTCTTTAAATTCGGTGGGTGGCGTAGCTAC  
CGAGATCAATGCTGTTAATTATGTCTCCCCTAGAAGTTGGTTAGCGACCTCCCATTTTGTCTAGGATTCTTCTTTTTTG  
TGGGCCATTTGTGGCATGCAGGAAGAGCCCGAGCTGCTGCAGCAGGCTTTGAAAAGGGAATTGATCGCGATTTGGAACCT  
GTTGTTTTACATGACCCCTCTTAAC-----  
ATGACTATAGCCGTTGGTAGAGTTACTAAAGAAGAA-----  
AACGATCTATTTCCCCTTATCGACGACTGGTTACGAAGGGACCGCTTCGTTTTTGTAGGATGGTCCGGCTTATTGCTCTT  
TCCTTGTGCTTATTTTCGCTTTAGGGGGTGGTTTACAGGGACTACTTTTGTAACTTCTTGGTATACCCATGGATTGGCTA  
GTTCCATTTTGAAGGTTGCAATTTCTTAACCGCGCGGTTTCCACACCTGCCAATAGTTTAGCACACTCTTTGTTGCTA  
CTATGGGGACCGGAAGCACAGGGAGATTTTACTCGTTGGTCTCAATTAGGTGGTCTTTGGACTTTTCTCGCTCTCCATGG  
AGCTTTTGCCTAATAGGTTTTCATGCTACGTCAATTTGAACTTGTCTGGCCTGTTCAATTGCGGCCTTATAATGCAATTT  
CATTCTCTGGTCCAATCGCTGTTTTTCTTTCCGTATTCCTTATTTATCCACTGGGACAATCTGGTTGGTTCTTCTCGCCG  
AGTTTTGGCGTAGCAGCTATATTTTCGCTTCATCTTTTCTTCCAAGGATTTTATAATTGGACGTTGAAACCATTTTCATAT  
GATGGGAGTTGCCGAGTATTAGGCGCAGTTCTGCTATGCGCTATCCACGGGGCTACCGTAGAAAAACACTCTATTTCGAAG  
ATGGCGATGGTGCAAATACCTTCCGTGCTTTTAAACCAAACCTCAAGCTGAAGAACTTATTCAATGGTCACTGCTAACCGC  
TTTTGGTCCCAAATCTTTGGTGTGCTTTTTCCAATAAACGTTGGTTACATTTCTTTATGCTATTTGTACCCGTCACCGG  
TTTATGGATGAGTGCTATTGGCGTAGTTGGTCTGGCTCTGAACCTACGTGCCTATGACTTCGTTTTCCAGGAAATCCGTG  
CAGCGGAAGATCCTGAATTTGAGACTTTCTACACCAAAAAATATTCTTTTAAACGAGGGTATTTCGTGCGTGGATGGCAGCT  
CAGGATCAGCCTCATGAAAATCTTATATTCCCTGAGGAGGTTTACCACGTGGAAACGCTCTT---  
ATGTCTGGAAGCACGGGAGAACGTTCTTTTGTGATATTATTACCAGTATTCGATACTGGGTTATTTCATAGCATTACTAT  
ACCTTCCCTATTTCATTGCGGGTGGTTATTTGTGCTGACGGGTTAGCTTATGACGTGTTTGGAAAGTCTTCGACCAAACG  
AGTATTTACGGAAAGCCGACAAGGAATTCATTAATAACCGACCGTTTTGATTCTTTAGAACAACCTAGATGAATTTAGT  
AGATCCTTT---  
ATGACCATAGATCGAACCTATCCTATTTTTTACAGTGCAGTGGCTGGCTGTTACGGATTAGCTGTACCCACGGTTTTTTT

CTTGGGATCAATATCAGCAATGCAGTTCATCCAACGA-----  
ATGGCTACACAAACCGTTGAAGATAGT---TCT---AGACCTAAG-----  
CCAAAACGGACTGGCGCAGGTAGTTTATTGAAACCCCTTGAATTCGGAATATGGGAAAGTTGCTCCGGGTTGGGGGACTAC  
TCCTTTTATGGGGGTCGCAATGGCTTTATTTCGCATATTCTATCTATAATTTTAGAAATTTATAATTTCTTCTGTTTTAC  
TGGACGGAATTTTAACGAAT-----  
ATGCTTACTCTCAAACCTTTTTGTTTTATACAGTAGTGATATTCTTTGTTTTCCCTCTTTATCTTTGGATTCTTATCTAATGA  
CCCAGGACGTAATCCTGGG---CGTGAGGAG-----  
ATGGCCGATACTACTGGAAGAATTCCTCTTTGGCTGATAGGTACTGTAACCTGGTATTCTTTGTGATTGGTTTAATAGGTTT  
TTTCTTTTACGGTTTCGTATTCTGGATTGGGTTTCATCTCTA-----ATGCCT-----  
AATATACTTAGTTTAACTGTATCTGTTTTAATTTCTGTTCTT---TGTCGG-----  
ACTAGCTTTTTCTTCGCCAAATTAACCCGAAGCTTATGCCATTTTCAACCCAATCGTGGATGTTATGCCTGTCATACCTGT  
ACTCTTTTTTCTATTAGCGTTTTGTTTGGCAAGCTGCTGTAAGTTTTTCGA---ATGACACAATCA-----  
AACCCGAATGAACAAAATGTTGAATTGAATCGTACCAGTCTATACTGGGGTTTATTACTCATTTTTTGTACTTGCTGTTTT  
ATTTTCCAATTACTTCTTCAAT---ATG---  
GAAGTAAATATTCTCGCATTATTGCTACAGCATTGTTTATTCTAGTTCCTACTGCCTTTTTACTTATTATTTATGTAA  
AACAGCCAGTCAAAAT-----GAT-----  
ATGGAAACAGCAACTTTAGTCGCCATCTCCATATCTGGTTTTACTTGTAAAGCTTTACTGGGTATGCCTTATATACCGCGTT  
TGGGCAA---CCCTCTCAACAATTAAGAGATCCATTTCGAAGAACATGGGGAC---  
ATGGAAGCATTGGTTTTATACGTTCTTTTAGTTTTCGACTTTAGGGATAATTTTTTTTCGCTATCTTCTCCGAGAACCACC  
TAAGGTTCCG-----  
ATGAATATTGCTTTCCAATTAGCTGTTTTTGCATTAATTGCGACTTCCTCAGTTTTAGTAATTAGAGGACACCTTGTATT  
TGCTTCTCCTGATGGTTGGTCAAATAATAAAAACGTTGTATTTCCGGTACATCATTATGGATTGGATTAGTCTTTCTGG  
TAGCTATTCTGAATTCTCTTATTTCT---  
ATGTCACCACAAACAGAACTAAAGCAAGTGTGGATTAAAGCTGGTGTAAAGGATTATAAATTGACTTACTACACCCC  
GGAGTACGAAACCAAGGATACTGATATCTTGGCAGCATTCCGAGTAACTCCTCAGCTCGGGGTTCCGCCTGAAGAAGCAG  
GAGCTGCAGTAGCTGCGGAATCTTCTACTGGTACATGGACAACCTGTTTGGACTGATGGACTTACCAGTCTTGATCGTTAC  
AAAGGACGATGCTATCACATCGAGCCCCTTCTGGGGACCCAGATCAATATATCTGTTATGTAGCTTATCCATTAGACCT  
ATTTGAAGAGGGTTCTGTTACTAACATGTTTTACTTCCATTGTGGGTAACGTATTTGGTTTTCAAAGCCTTACGCGCTCTAC  
GTTTGGAGGATCTACGAATTTCCCTTCTTATTCAAACAACTTTCCAAGGTCGCTCACGGTATCCAAGTTGAAAGGGAT  
AAGTTGAACAAGTACGGTCTCCTTTATTGGGATGTACTATTAACCAAAAATTGGGATTATCCGCAAAAAAATTACGGTAG  
AGCGTGTATGAGTGTCTACGCGGTGGACTTGATTTTTACCAAAGATGATGAAAACGTAAACTCACAACCATTTATGCGCT  
GGAGAGACCGTTTTCGTCTTTTGTGCCGAAGCAATTTATAAAGCACAAGCCGAAACTGGTGAAATCAAG-----  
GGGCATTACTTGAATGCGACTGCAGGTACATGCGAAGAAATGATTAAGAGAGCTGTATTTGCAAGGGAATTAGGGGTTCC  
TATTGTAATGCATGACTACTTAACAGGAGGATTACCAGCAATACTACTTTGTCTCATTATTGCCGCGACAACGGCCTAC  
TTCTTACATTCACCGAGCAATGCATGCAGTTATTGATAGACAGAAAAATCATGGTATGCATTTCC

Acorus

GTGTAAGTACTAGCTAAAGCGCTACGTATGTCTGGTGGAGATCACATTCACGCCGGTACAGTAGTAGGTAAACTGGAAGGGGAA  
CGTGAATGACTTTAGGTTTTGTTGATTTACTACGTGATGATTATATTGAAAAAGACCGAAGTCGTGGTATTTTTTTTCAC  
TCAAGATTGGGTCTCTATGCCAGGTGTTTTGCCCGTAGCTTCCGGTGGTATTACGTTTTGGCATATGCCTGCCTTGACCG  
AGATCTTTGGGGATGATTCTGTACTACAGTTCGGTGGAGGAACTTTAGGACACCCTTGGGGAAATGCACCTGGTGCAGTA  
GCCAATCGGGTAGCTTTAGAAGCGTGTGTACAAGCTCGTAATGAGGGACGTGATCTTGCTCGCGAAAGTACTCAAATTAT  
CCGTGAAGCTTGTAATGGAGCCCTGAGCTAGCC---GCTGCTTGTGAA---GTATGG---AAGGAAATCAAATTTGAG-  
--TTCGAACCAGTAGATAAGCTAGAT-----  
GCGATACATTTATACAAAACCTTCTACCTCGAGCACACGCAATGGAGCCGTA-----GACAGT-----  
CAAGTGAATCCAATCCACGAAAT-----  
AATTTGATCTATGGACAGCATCATTGTGGTAAAGGTGCGTAATGCCAGAGGAATCATTACCGCAGGGCATAGAGGGGGAGG  
TCATAAGCGTCTATACCGTAAAATCGATTTTCGACGGAATAAAAA---GACATATCTGGTAGAATC-----  
--  
GTAACCATAGAATACGACCCTAATCGAAATGCATACATTTGTCTCATACTATGGGGATGGTGAAGAGATATATTTT  
ACATCCCAGAGGGGCTATAATTGGAGATACCATTGTTTCTGGT-----ACAGAAGTTTCTATATCAATG-----  
-----GGAAATGCCCTACCTTTGAGT---  
ACCGATATGCCCTTAGGCACGGCCATACATAACATAGAAATCACACTTGGAAAGGGTGGACAATTAGCTAGAGCAGCGGG  
TGCTGTAGCGAAACTGATTGCAAAAGAGGGTAAATCGGCCACATTAAGATTACCATCCGGGGAGGTCCGTTTGATATCCA  
AAAATGCTCAGCAACAGTCGGACAAGTAGGTAATGTTGGGGCGAACCAACAAAGTTTGGGTAGAGCCGGATCTAAGTGT  
TGGCTAGGTAAGCGTCTGTAGTAAGAGGAGTAGTTATGAACCCTGTGGACCATCCCCACGGGGGTGGTGAAGGGAGAGC  
CCCAATTGGTAGAAAAAACCCACAACCCTTGGGGTTACCCTGCGCTTGGAAAGAAGAAGTAGGAAAAGGAATAAATATA

GTGATCGTTTTATTCTTCGTCGCCGT-----  
ATGATTCAACCTCAGACCCTTTTAAATGTAGCGGATAACAGCGGGGCTCGAGAATTGATGTGTATTCGAATCATAGGAGC  
C---  
AGTAATCGCCGATATGCTCATATTGGTGACGTTATTGTTGCTGTAATCAAAGAAGCAGTACCCAATATGTCTCTAGAAAG  
ATCAGAAGTGGTCAGAGCTGTAATTGTACGTACATGTAAAGAACTCAAACGTGACAACGGTATGATAATACGATATGATG  
ACAATGCAGCAGTTGTCATTGATCAAGAAGGG---  
AATCCAAAAGGAACTCGAGTTTTTGGTGCGATCGCTCGGGAATTGAGACATTTGAATTTCACTAAAATAGTTTTCCCTAGC  
TCCTGAGGTATTA-----  
AACCCCAAAGAACCAGATTCGTAACAACATAGAGGAAGAATGAAGGGAATGTCTTATCGAGGCAGTCATATTTGTTT  
CGGAAGATACGCTCTTCAGGCACCTTGAACCATCTTGGATCACATCTAGACAAATAGAAGCGGGGCGAAGGGCAATGACAC  
GATATGCACGTCGTGGTGGAAAAATCTGGGTACGTATATTTCCGGACAAACCCGTTACAATAAGACCCGCGGAAACACGT  
ATGGGTTCCGGGAAGGGATCCCCGAATACTGGGTATCCGTTGTTAAACCGGGTCGAATACTTTATGAGATGGGTGGAGT  
ATCAGAACTGTAGCCAGAGCCGCTATTGAAATAGCCGCGTCCAAAATGCCTATAAGAACGCAATTTATT-----  
-----  
ATGACCAGAGTTAGGCGAGGATATATAGCTCGGAGACGTCGAACAAAAATTCGTTTTATTTGCAGCAACCTTTTCGAGGGGC  
TCATTCAAGACTTACTCGAGCTGCCACTCAACAGAAAATGAGAGCTTTGGTTTTCTGCTCATCGAGATAGAGGCAAGCAAA  
AGAGAGATTTTCGTCGTTTTGTGGATCACTCGGATAAATGCGGTAACCTCGTGAGAAT-----  
GGGGTATGCTATAGTTATAGTCGATTAATGCACAATCTGTATAAGAGGCAGTTGCTTCTTAATCGTAAAATACTTGCA--  
-----CAAATAGCTATATTAATAAGAATTGTCTTCACATAATTTCCAATGAGATCATCAA-----  
-----  
ATGATAAAGAAAAAT-----  
TGGATTACTACGGGTACGGAAGCACGGGCTTTAGCTCAAAAT---  
ATATCTATGTCTGCTTACAAAGCGGAGAAGAGTAATTGATCAGATTCGTGGGCGTTCCTATGAGGAAACAATTATGATACT  
AGAACTGATGCCTTATCGAGCATCTTTTCTATTTTAAAATTGGTTTTACTCTGCAGCAGCAAATGCTATTAACAATATGG  
GTTTGAGCGAAGCTGATTTATTCATTAGTAAAGCAGAAGTCAATGGAGGTACTTTTCGTGAAAAAGTTACGACCCCGAGCT  
CGGGGACGTAGTTATGCGATAAAAAGGCCCACTTGTATATAACAATTGTATTGAAGGATAAAGATAAATCGCTTTTTAA  
TGAATA-----  
-----  
ATGGATGGAATCAAATATGCAGTATTTACCGAAAAAGTATTCCGTTATTGGGG---  
AACAAATCAATATACTTCTAATGTGCAATCAGGATCAACTAGGACAGAAATAAAGCATTGGGTGCAACTCTTCTTTGGCGT  
CAAGGTAATAGCTATGAATAGTCATCGACTC-----CCGGGAAAG-----  
GGTAGAAGAGTGGGACCTATTAAGGGACATACAATGCATTACAGACGTATGATCATTACGCTTCAACCGGGTTATTCTAT  
TCCACCTCTTATAGAGAAAAGAACTTAA-----  
ATGGCGGTTCCAAAGAAACGTACTTCTATATCAAAAAACGTATTCGTAAAAATTTTTGGAAGAAA---  
AAGGGATATTTTCCGCGGTAAAAGCTTTTTCTTTAGCTAAATCA-----GTTTCCACCGGACAG-----  
TCAAAAAGTTTTTTT-----GTGCGACAAACAAGTAATAAATCC---  
TTGGAA-----  
ATGGCCAAG---GGTAAAGATGCC---AGATTAACAGTTATTTTGAATGTACCAGTTGTGTC-----  
CGAAATGGTGTCAAT-----  
AAGGAATCGCCGGGTATTTCCAGATATATTACTCAAAAAATCGACACAATACATCGAGTCGATTAGAATTGAGAAAATA  
TTGTCGCTATTGTTATAAGCATACGATTCACGGGGAATAAAGAAA-----  
ATGAAAATAAGAGCCTCTGTTTCGTAAAATTTGCGAAAAATGTGCGACTAATCCGTAGGCGGGGACGAATTATAGTTATTTG  
TTAT---AATCCGAAACATAAACAAGACAGGGG-----ATGGTT-----  
CGAGAGGAAGTAGTAGGATCCACT-----CGGGCACTACAGTGGAAGTGTGTTGAATCA---AGAGCAGAC---  
AGTAAGCGCCTT---  
TATTATGGTCGTTTTCTATTCTGTCCCCACTTCTGAAAGGACAAGCCGATACTATAGGTATCGCCATGCGAAGGGCTTTACT  
TGGAGAAATAGAAGGAACATGTATCACACGTGCAAAATCTGAGAAGGTACCACATGAATATTCTACGATAGCGGGCATTG  
AAGAATCAGTACATGAAATTTTAAATGAATTTGAAAGAAATTGTATTGAGAAGTAATCTTTATGGAACCTCGAGAC---  
GCATCTATTTGCGTCAGAGGTCCTAGATGCGTAACTGCTCAAGACATCATCTCACCACCTTCCGTAGAAGTAGTTGATAC  
TACACAACATATAGCTAGCCTGACGGAACCGATTGATTTGTGTATTGGATTACAAATCCAGAGGGATCGCGGATATCGTA  
TGAAAACCACA---AAAACTCTCAAGATGGA---AGTTATCCG-----  
ATAGATGCTGTATCCATGCCTGTTTCGAAATGCGAATCATAGTATTCATTCTTATGGAAATGGTAATCAG-----  
AAACAAGAGATA  
Amborella  
GTGTACTAGCTAAAGCATTGCGTATGTCTGGTGGGGATCATATTCACGCTGGTACCGTAGTAGGTAAGTGGAAAGGGGAA  
CGGGATGTCACCTTTGGGTTTTGTTGATCTACTACGTGATGATTTTTATTGAAAAGACCGAAGTCGCGGTATTTATTTAC

TCAAGATTGGGTATCTATGCCAGGTGTTCTGCCCGTGGCTTCAGGTGGTATTACGTTTTGGCATATGCCTGCCCTGACCG  
AGATCTTTGGGGATGATTCCGTATTACAGTTCGGCGGAGGAACCTCTGGGACACCCTTGGGGAAATGCACCCGGTGCAGTA  
GCTAATCGGGTGGCTTTAGAAGCGTGCGTACAAGCTCGTAATGAGGGACGTGATCTTGCTCGTGAAGGTAATGAAGTTAT  
CCGTGAAGCTAGCAGGTGGAGCCAGAAGCTAGCT---GCTGCTTGTGAG---GTATGG---AAGGAGATCAAATTCGAA-  
--TTCGAAGCAATGGATGTCTTG-----  
ACGGCGATACATTTATACAAAACCTTCTACCCCGAGCACACGCAATGGAGCCGTA-----GACAGT-----  
CAAGTGAAATCCAATCCACGAAAG-----  
AATTTGATCTATGGACAGCATCGTTGTGGTAAAGGTCGTAATGCCAGAGGAATCATTACCGCAGGGCATAGAGGGGGGGG  
TCATAAGCGTCTATACCGTAAAATCGATTTTCGACGGAATGAAAA---GACATATCTGGTAGAATC-----  
--  
GTAACCATAGAATACGACCCTAATCGAAATGCATACATTTGTCTCATACTATGGGGATGGTGAAGAAGATATATTTT  
ACATCCCAGAGGGGCTATAATTGGAGATACCATTGTTTCTGGT-----ACAGAAGTTCCTATATCAATG-----  
-----GGAAATGCCCTACCTTG-----  
ACCGATATGCCCTTAGGCACGGCCATACATAATATAGAAATAACACTTGGAAAGGGTGGACAATTAGCTAGAGCAGCAGG  
TGCTGTAGCGAAACTGATTGCAAAAGAGGGTAAATCGGCCACATTAAGATTACCATCTGGGGAGGTTGTTTTGATATCCA  
AAAACCTGCTCAGCAACAGTCGGACAAGTGGGTAATGTTGGGGTGAACCAGAAAATTTGGGTAGAGCCGGATCTAAATGT  
TGGCTAGGTAAGCGTCTGTAGTAAGAGGAGTAGTTATGAACCCTGTAGACCATCCCCATGGGGGTGGTGAAGGGAGGGC  
CCCAATTGGTAGAAAAAACCCACAACCCCTTGGGGTTATCCCGCGCTTGGAAAGAAGAAGTAGGAAAAAGAAGAAATATA  
GTGATAGTTTTCATTCTTCGTCGTCGT---AAG-----  
ATGATTCAAGCTCAAACCTATTTGAATGTAGCGGACAACAGCGGGCTCGAGAATTGATGTGTATTGCAATCGTAGGAGC  
T---  
AGTAACCCCGATATGCTCATATTGGTGACGTTATTGTTGCTGTAATCAAAGAAGCAGTACCCAATATGCCCTGGAAAG  
ATCAGAAGTGATCAGAGCTGTAATTGTACGTACATGTAAGAAGACTCAAACGTGACAACGGTATAATAATACGATATGATG  
ACAATGCAGCAGTTGTTATTGATCCAGAGGGA---  
AATCCAAAAGGAACCTCGAGTCTTTGGTTCGATCGCTGGGGAATTGAGACATTTGAATTTCACTAAGATAGTATCATTAGC  
TCCCGAGGTATTC---ATGCTTAGT---  
CCTAAAAGAACCAGATTCGGTAAACAACATAGAGGAAGAATGAAGGGAGTATCTTCTCGGGCAATCATATTTGTTTCGG  
TAGATACGCTCTTCAGGCACCTGAACCTGCTTGGATCACATCTAGACAAATAGAAGCGGGTAGACGAGCAATGACACGAT  
ACGCTCGTCGCGGGGAAAAATATGGGTACGCGTATTCCCCGACAAACCCATTACAGTAAGACCCGCGGAAACACGTATG  
GGTTCGGGAAAGGGATCTCCTGAATATTGGGTTTCTGTAATTAACCGGGTCAATACTTCATGAAATGGGCGGAGTGCC  
AGAACTGTCCAGAGCAGCTATGGAAATAGCCGCGTGCAAAATGCCTATACGAACTCAATTCATTAGTGCGAAA----  
-----  
ATGACCAGAGTTAGACGCGGATATATAGCTCGCAGACGTGCAACAAAAATTCGTTTTATTTGCATCGACCTTTTCAGGGGC  
CCATTCAAGACTTACTCGAACTGCTACTCAACAGAAAATGAGGGCTTTGGTTTTCCATTTATCGGGATAGAGGTAGGCAAA  
AGAGAGAATTTGTCGCTTGTGGATCGCTCGGATAAATGCAGCAACTCACGAAAAT-----  
GGGGTATCCTATAGT-----CGATTAATAAACGATCTGTACAAGAGGCAGTTGCTTCTTAATCGTAAAATACCTGCA--  
-----CAAATAGCTAGATACAATCTAAATTCCTTTACATGATTTCCAATGAAATCATAAAA-----  
-----  
ATGATAAATAAA-----  
ATCTCAGGTACAGAAATACGAGCATTAGCTAAACAT---  
ATATGTATGTCCCCTCACAAAGCGCGAAGAGTTATTGATCAGATTCGCGGTTGCTCTTATGAACAAACACTTATGATACT  
AGAACTCATGCCGTATCGAGTATGTTATCCCGTTTTCAAATTGGTTTTACTCTGCAGCGGCAATGCTAGTCACAATATGG  
GTTTGAACGAAGCTGATTCATTCATTAGTAAAGCGGAAGTCCATGGAGGTGCCATGATGAAAAAGTTCAAACCTAAAGCT  
AGGGGACGCAGTTATCCGATAAAAAGACCCACTTGTATATAACTATTGTTTTAAAGGAAAGAAAAAGAGTCCCCTTGT  
AGTTTTGA-----  
-----  
ATGGATGGAATCAAATATGCAGTATTTACAGAAAAAGTATTTCGGTTATTGGGG---  
AACAAATCAATATACTTCTAATGTGCAATCAGGATCAACTAGGGCAGAAATAAAGCATTGGATCGAACTCTTCTTTGGTGT  
CAAGGTAATAGCTATGAATAGTCATCGACTCCCGGTCCCGGGAAAG-----  
GGTAGAAGAATGGGACCTCTTATGGGACATAGAATGCATTACAGACGTATGATCATTACGCTTCAACCGGGTTATTCTAT  
TCCACCTCTTATAGAGAAAAGGACTTAA-----  
ATGGCAGTCCCAAAGAAACGTACTTCTATGTCAAAAAAGCATATTCGTAGAAATTATTGGAAGAGA---  
AAGGGATATAAAGCCGCGGTAAAAGCTTTTTCTTTAGGTAAATCT-----GTTTCTACCGGGCAT-----  
TCAAAAAGTTTTTTTT-----GTGCAACAAACAACAACAAAAACA---  
AACAAA-----  
ATGGCCAAA---GGTAAAGATGCT---AGAGTAAGAGTATTTTGGAAATGTACCAGTTGTACT-----

CGAAATGGTGCTAATGCTAAG-----  
AAGGAATCACCGGGCATTTCAGATATATTACTGAAAAGAATCGACACAATACACCTAGTCGATTGGAATTGAAGAAATT  
CTGTCTTTATTGTTTGAAGCATATGATTCACGCGGAGATAAAGAAA-----  
ATGAAAATAAGAGCCTCTGTTTCGTAAGATTTGTGAAAATGTGCGACTGATTCGTAGGCGAGGACGAATTATAGTAATTTG  
TTCC---AATCCGAGACATAAACAGAGACAGGGG-----ATGGTT-----  
CGAAAGGAAGTACCAGTATCCAAT-----CGGACACTACAGTGGAAGTGTGTTGAATCA---AAAGCAGAC---  
AGTAAGCGTCTT---  
TATTATGGTCGTTTTCGTTCTATCTCCGCTTATGAAAGGTCAAGCTGATACGATAGGTACCGCGATGCGAAGGTCTTTACT  
TGGAGAAATAGAAGGAACATGTATCACATGTGCAAAATCTGAGAGGGTACCACATGAATATTCTACAATAGTAGGTATTG  
AGGAATCAGTACATGAAATTTAATGAATTTGAAAGAAATTTATAGTTAGAAGCGATCTGTACGGGACTCGTGAT---  
GCATTTATCTGTGTTAGGGGCTCTAAATATGTAATCTCAAGATATAATCTCACCACCTTCTGTGAAAATAGTTGATAC  
TACACAGCATATAGCTAGTATCACCGAACCAATTAATTTTGTATTGGATTAGAAATCGAGAGAAATCGCGGATATCGTA  
CGAGAACCACC-----AAC---CAAGATGCA---AGTTATCCT-----  
ATAGATGCTGTATCTATGCCTGTTTGAATGCGAATTATAGTATTCAATGTTTATGGAAATGAGAATGAA-----  
AAACAAGAGATA  
Arabidopsis  
GTGTACTAGCTAAAGCTTTACGTCTATCTGGTGGAGATCATATTCACGCGGGTACAGTAGTAGGTAAACTTGAAGGAGAC  
AGGGAGTCAACTTTGGGCTTTGTTGATTTACTGCGCGATGATTATGTTGAAAAGATCGAAGCCGCGGTATCTTTTTCAC  
TCAAGATTGGGTCTCACTACCTGGTGTCTGCCTGTGGCTTCAGGGGGTATTACGTTTGGCATATGCCTGCTTTGACCG  
AGATCTTTGGAGATGATTCTGTACTACAATTCGGTGGAGGAACCTTTAGGCCACCCTTGGGGAAATGCACCGGGTGCCGTA  
GCCAACCGAGTAGCTCTGGAAGCATGTGTACAAGCTCGTAATGAGGGACGTGATCTTGCAGTCGAGGGTAATGAAATTAT  
CCGTGAAGCTTGCAAATGGAGTCTGAACTAGCT---GCTGCTTGTGAA---GTATGG---AAAGAGATCACATTTAAC-  
--TTCCCAACCATCGATAAATTAGATGGCCAAGAG-----  
ATGGCGATACATTTATACAAAATCTACCCCGAGCACACGCAATGGAGCCGTA-----GACAGT-----  
CAAGTGAAATCCAATCCACGAAAT-----  
AATTTGATCTGTGGGCAGCATCATTGTGGTAAAGGTGCGTAATGCCAGAGGAATAATTACCGCAAGGCATAGAGGGGGAGG  
TCATAAGCGTCTATACCGTAAAATAGATTTTCGACGAAATGCAAAA---GACATATATGGTAGAATC-----  
--  
GTAACCATAGAATACGACCCTAATCGAAATGCATACATTTGTCTCATACTATGGGGATGGTGAAGAAGATATATTTT  
ACATCCCAGAGGGGCTATAAATTGGAGATACCATTGTTTCTGGT-----ACAGAAGTTCCTATAAAAATG-----  
-----GGAAATGCCCTACCTTTG-----  
ACCGATATGCCCTTAGGCACGGCCATACATAATATAGAAATCACACTTGGAAAGGGGTGGACAATTAGCTAGAGCAGCGGG  
TGCTGTAGCGAAACTGATTGCAAAAGAGGGGAAATCGGCCACATTAATAATTACCTTCTGGAGAGGTCCGTTTGATATCCA  
AAAATGCTCAGCAACAGTCGGACAAGTGGGAAATGTTGGGGTAAACCAGAAAAGTTGGGTAGAGCCGGATCGAAATGT  
TGGCTAGGTAAACGTCTGTAGTAAGAGGAGTAGTTATGAACCCTGTGACCATCCCCATGGAGGTGGTGAAGGGAGGGC  
TCCAATTGGTAGAAAAAACCCGTAACCCCTGGGGTTATCCTGCACTTGGAAAGAAGAACTAGAAAAAGGAAAAAATATA  
GTGAGACTTTGATTCTTCGTCGCCGTAGTAAA-----  
ATGATTCAACCACAAACCTATTTGAATGTAGCAGACAACAGCGGGGCTAGAGAATTGATGTGTATTGGAATAATAGGAGC  
T---  
AGTAATCGCCGATATGCTCATATTTGGTGACGTTATTGTTGCTGTAATCAAAGAAGCAATACCAAATACTCCTCTAGAAAG  
ATCAGAAGTGATTAGAGCTGTAATTGTACGTACTTGTAAAGAACTCAAACGTAACAATGGGACGATAATACGATATGATG  
ACAATGCCGCGATTGTCATTGATCAAGAAGGA---  
AATCCAAAAGGAACCTCGAGTTTTTGGGGCGATCCCACGGGAATTGAGACAATTAACCTTTACTAAAATAGTTTCATTAGC  
TCCTGAGGTATTA---ATGCTTAGT---  
CCAAAAAGAACCAGATTTTCGTAACAACATCGAGGAAGACTAAAAGGAATATCTTCTCGTGGGAATCGTATTTGTTTTGG  
CAGATATGCTCTTCAAACACTTGAACCCGCTTGGATCACATCTAGACAAATAGAAGCAGGGCGACGCGCAATGACACGAA  
ATGTACGACGTGGTGGAAAAAATTTGGGTACGTATATTTCCAGACAAACCAGTTACAGTAAGACCTGCGGAAACCGGTATG  
GGTTCTGGGAAAGGATCCCCTGAGTATTGGGTAGCTGTGGTTAAACCAGGTAAAATCCTTTATGAAATGGGTGGTGTACC  
CGAAAAATATAGCAAGAAAAGCTATTTCAATAGCGGCATCAAAAATGCCTATAAAAAACCAATTCATTATTTCTGAA----  
-----  
ATGACTAGAATTAACCGCGGATATATAGCTCGGAGGCGTAGAACAAAATCTCGTTTATTTGCATCAAGCTTTTCAGGGGGC  
TCATTCACGGCTTACACGAACATGACTCAACAGAGAATAAGAGCTTTAGTTTCGGCTCATCGGGATAGGGGTAAGAA  
AAAGAGATTTTCGCCGTTTATGGATCACTCGAATAAATGCCGTAATTCACGAAATG-----  
GGGGTATTCTATAGTTATAATGAATTCATACACAATCTATAACAAGAAGCAATTACTTCTTAATCGGAAAATACTTGCA--  
-----CAAATAGCTCTATTAATAGGAGTTGTCTTTATACAATTTGCAATGACATAAAAAAA-----  
-----  
ATGATAAAGAAGAGAAAAAAG-----

AAATCATATACGGAAGTATATGCTTTAGGGCAATAT---  
ATATCTATGTCTGCCATAAAGCACGGAGAGTAATTGATCAAATACGTGGACGTTCCCTATGAAGAAGCACTTATGATATT  
AGAAGTTATGCCTTATCGAGGATGTTATCCCATTTTTAAATTGGTTTTATTCTGCTGCAGCGAACGCTAGTCACAATAAGG  
GTTTCAAAGAAACCAATTTAGTCATTAGTAAAGCTGAGGTGAACCAAGGGAATACTGTGAAAAAATTA AACCTCGTGCC  
CGAGGACGAAGTTACCCAATAAACGATCCACTTGT CATATAACTATCGTATTGGAAGATATATCCTTCTATCAA---  
CAATATGAAGAA-----TATTTAATGTATTTA-----  
AAAAACCTGGA---TGC-----AGCAATGAAACAGAAATCTAACATGTTATGATACA-----  
-----  
TATAGTAGTGGAGGCCTATGGGACAAAAATAAATGGATGGAATCAAATATGCAGTATTTACAGACAAAAGTATTCGGTT  
ATTGGGG---  
AAAAATCAATATACTTTTAATGTGCAATCAGGATCAACTAGGACAGAAATAAAGCATTGGGTGCAACTCTTCTTTGGTGT  
CAAGGTAATAGCTATGAATAGTCATCGACTC-----CCCGGAAAG-----  
GTTAAAAGAATGGGACCTATTCTGGGACATACAATGCATTACAGACGTATGATCATTACGCTTCAACCGGGTTATTCTAT  
TCCACCTCTTAGAAAGAAAAGA ACTTAA-----  
ATGGCAGTTCACAAAAACGTA CTCTATCTCGAAAAAGCGTATTCGTAAAAAATTTGGAAAAGG---  
AAGGGATATTGGACATCGTTGAAAGCTTTTTATTAGGGAAATCA-----CTTTCTACAGGTAAT-----  
TCAAAAAGTTTTTTT-----GTACAGCAA-----AATAAA-----  
-----  
ATGGCCAAG---GGTAAAGATGTT---CGAGTAACAATTATTTTGGAAATGTACCAGTTGTGTT-----  
CGAAATGATATTAAG-----  
AAAGAAGCCGCGGGAATTTCCAGATATATTACTCAAAGAATCGGCATAACACCCCTAGTCGATTGGAATTGAGAAAATT  
CTGTCCCTATTGTTATAAACATACAATTCACGGGGAAATCAAGAAA-----  
ATGAAAATAAGGGCTTCCGTTTCGTAAAATTTGTGAAAAGTGTGCGACTAATCCGCAGGAGGGGACGAATTATAGTAATTTG  
TTCC---AACCCGAGGCATAAACAAAGACAAGGA-----ATGGTT-----  
CGAGAGAAAGTCAAAGTATCTACT-----CGGACACTACAGTGGAAAGTGTGTTGAATCA---AAAAGAGAC---  
AGTAAGCGTCTT---  
TATTATGGACGCTTTATTCTGTCTCCACTTATGAAAGGCCAAGCCGACACAATAGGCATTGCGATGCGAAGAGCTTTACT  
TGGCGAAATAGAAGGAACATGTATTACACGTGCAAAATCTGAGAACATACCACATGACTATTCTAACATAGCAGGTATTC  
AAGAATCAGTACATGAAATTTTAATGAATTTGAACGAGATTGTATTAAGAAGTAATCTATATGGAACGCGCAAC---  
GCGCTTATTTGTGTCCAAGGTCCTGGATATATAACTGCTCGAGACATTATTTTACCGCCCGCTGTGGAAATCATTGATAA  
TACACAGCATATAGCTACCTTAACAGAACCAATAGATTTGTGTATTGAATTA AAAAATTGAGAGGAATCGCGGATATAGTC  
TAAAAATGTCA---AATAACTTTGAAGACAGA---AGTTATCTT-----  
ATCGATGCTGTATTTCATGCCTGTTGAAAATGCCAATCATAGTATTCATTCTTATGGGAATGGGAATGAA-----  
AAACAAGAGATT  
Atropa  
GGGTATTAGCAAAGCGTTACGTATGTCTGGTGGAGATCATATTCACTCTGGTACCGTAGTAGGTAACTTGAAGGTGAA  
AGAGACATAACTTTGGGCTTTGTTGATTTACTGCGTGATGATTTTGTGTAACAAGATCGAAGTCGCGGTATTTATTTTAC  
TCAAGATTGGGTCTCTTTACCAGGTGTTCTACCCGTGGCTTCAGGAGGTATTCAGTTTGGCATATGCCTGCTCTAACCG  
AGATCTTTGGGGATGATTCCGTA CTACAGTTCGGTGGAGGAACTTTAGGACACCCTTGGGGTAATCCGCCAGGTGCCGTA  
GCTAACCGAGTAGCTCTAGAAGCATGTGTAAGGCTCGTAATGAAGGACGTGATCTTGCTCAGGAAGGTAATGAGATTAT  
TCGCGAGGCTTGCAAATGGAGCCCGGA ACTAGCT---GCTGCTTGTGAG---GTATGG---AAAGAGATCGTATTTAAT-  
---TTTGCAGCTGTGGACGTTTTGGATAAG-----  
ATGGCGATACATTTATACAAA ACTTCTACCCCGAGCACACGCAATGGAACCGTA-----GATAGT-----  
CAAGTGAAATCCAATCCACGAAAT-----  
AATTTGATCTATGGACAGCGTCGTTGTGGTAAAGGTCGTAATGCCAGAGGAATCATTACCGCAAGGCATAGAGGGGGAGG  
TCATAAGCGTCTATACCGTAAAATCGATTTTCGACGGAATGAAAA---GACATATATGGTAGAATC-----  
---  
GTAACCATAGAATACGACCCTAATCGAAATGCATACATTTGTCTCATACTATGGGGATGGTGAAGAAGATATATTTT  
ACATCCCAGAGGGGCTATAATTGGAGATACCATTGTTTCTGGT-----ACAGAAGTTCTATAAAAAATG-----  
-----GGAAATGCCCTACCTTTG-----  
ACCGATATGCCCTTAGGCACGGCCATACATAACATAGAAATCACACTTGGAAAGGGTGGACAATTAGCTAGAGCAGCGGG  
TGCTGTAGCGAAACTGATTGCAAAAGAGGGGAAATCGGCCACATTA AAAATTACCTTCTGGGGAGGTCCGTTTGATATCCA  
AAA ACTGCTCAGCAACAGTTGGACAAGTGGGGAATGTTGGGGTGAACCAAAAAGTTTGGGTAGAGCCGGATCTAAACGT  
TGGCTAGGTAAGCGTCTGTAGTAAGAGGAGTAGTTATGAACCCTGTAGACCATCCCCATGGGGGTGGTGAAGGGAGAGC  
CCCAATTGGTAGAAAAAAACCCACAACCCCTTGGGGTTATCCTGCACTTGAAGAAGAAGTAGAAAAAGGAATAAATATA  
GTGATAATTTGATTCTTCGTGCGCGTAGTAAA-----  
ATGATTCAACCTCAGACCCATTTAAATGTAGCGGATAACAGCGGGGCTCGAGAATTAATGTGTATTGCAATCATAGGAGC



T---

AGCAATCGTCGATATGCTCATATTGGTGACGTTATTGTTGCTGTGATCAAAGAAGCAGTACCAAATATGCCCTAGAAAG  
ATCAGAAATAGTCAGAGCTGTAATTGTGCGTACCTGTAAAGAACTCAAACGTGACAACGGGATGATAATACGATATGATG  
ACAATGCTGCAGTTGTTATTGATCAAGAAGGA---  
AATCCAAAAGGAACTCGAATTTTTGGTGCAATCGCCCCGGGAATTGAGAGAATTAATTTTTACTAAAATAGTTTCATTAGC  
TCCCGAGGTATTA---ATGCTTAGT---  
CCCAAAAGAACCAGATTCCGTAACAACATAGAGGAAGAATGAAGGGAATATCTTATCGAGGTAATCATATTTCTTTTCGG  
TAAATATGCTCTTCAGGCACCTTGAACCTGCTTGGATTACATCTAGACAAATAGAAGCAGGCCGACGAGCAATGACACGAA  
ATGCACGTCGTGGTGGAAAAATATGGGTACGTATATTTCCAGACAAACCAGTTACTACTAAGACCCGCAGAAAACACGTATG  
GGTTCAGGAAAAGGATCCCCTGAATATTGGGTAGCTGTTGTTAAACCGGGTCAATACTTTATGAAATGGGTGGAGTAAC  
AGAAAATATAGCCAGAAGGGCTATTTCACTAGCAGCATCCAAAATGCCTATACGAACTCAATTCATTATTTCA-----

ATGACCAGAATTAACCGGGATATATAGCTCGGAGACGTAGAACAAAAATTCGTTTATTTGCATCAAGCTTTTCGAGGGGC  
TCATTCAAGGCTTACTCGAACTATTACTCAACAGAAAATAAGAGCTTTAGTTTCGGCTCATCGGGATAGGGATAGGAAAA  
AGAGAGATTTTCGTCGTTTGTGGATCACTCGGATAAACCGCAGTAATTCGCGAAAGG-----  
GGAGTATCCTATAGTTATAGTAGATTAATACACGATCTGTACAAGAGACAGTTGCTTCTTAACCGTAAAATACTTGCA--

CAAATAGCTATATCAAATAGGAATTGTCTTTATATGATTTTGAACGAAATCATAAAGGAAGTAGATTGGAAAGAATCCAC  
CAGAATAATT-----ATGCTAAAG-----

-----AAGAAAAAACAGAAGTATATGCTTTAGGTGAACAT---  
ATATCTATGTCTGCTGACAAAGCACGAAGAGTAATTGATCAAATTCGCGGACGTTCTATGAGGAAACGCTTATGATACT  
AGAACTCATGCCCTATCGAGCATGTTATCCCATTTTGAATTTGGTTTATTCTGCAGCAGCAAATGCTAGTTATAATATGG  
GTTCCAGCGAAGCCAATTTAGTCATTAGTAAAGCCGAAGTCAATGGGGGTACGACTGTGAAGAAATTTGAAACCTCGAGCT  
CGAGGACGTAGTTTCCGATAAAAAGATCGACCTGTATATAACTATTGTAATGAAAGATATATCTTTAAATGATGAATA  
TGTC-----AAGATGAATTCGTTA-----  
AAAAAACGAGA---TGG-----AAAAAAAATCTACAGCTATGACGTATCATGATATG-----

TATAATAGTGGGGGATTATGGGACAAAAATAAATGGATGGAATCAAATATGCAGTATTTACAGACAAAAGTATTCGGTT  
ATTGGGG---

AAAAATCAATATACTTCTAATGTGCAATCAGGATCAACTAGGACAGAAATAAAGCATTGGGTGCAACTCTTCTTTGGTGT  
CAAGGTAATAGCTATGAATAGTCATCGACTT-----CCGGGAAAAG-----  
AGTAGAAGAATGGGACCTATTATGGGACATACAATGCATTACAGACGTATGATCATTACGCTTCAACCGGGTTATTCTAT  
TCCACCTCTTAGAAAGAAAAGAACTTAA-----  
ATGGCAGTTCACAAAAACGCACTTCGACATCAAAAAAGCGTATCCGTAAAAATATTTGGAAAAGG---  
AAGGGATATTGGGTAGCATTAAAGGCTTTTTTTCATTAGCGAAATCT-----CTTTCTACCGGGAAT-----  
TCAAAAAGTTTTTTT-----GTACGCCAA-----  
ACAAAAATAAAT---AAG-----

ATGGCCAAG---GGGAAAGATGTC---CGAGTAACGGTGATTTTGGAAATGTACTAGTTGTGTC-----  
CGAAACAGTGTTGAT-----

AAGGTATCAAGAGGTATTTCCAGATATATTACTCAAAGAACCAGCACAAATACGCCTAATCGATTAGAATTGAAAAAATT  
CTGTCCCTATTGTTACAAACATACGATTCATGGGGAAATAAAGAAA-----  
ATGAAAATAAGAGCTTCCGTTTCGTAAAATTTGTGAAAAATGTGCGACTAATCCGTAGGCCGGGGACGAATTATAGTAATTTG  
TTCC---AACCCGAGACATAAACAAAGACAGGGG-----ATGGTT-----  
CGAGAGAAAGTAACAGTATCTACT-----CGGACACTACAGTGGAAGTGTGTTGAATCA---AGAACAGAC---  
AGTAAACGCCTT---

TATTATGGACGCTTTATTCTGTCTCCACTTATGAAAGGACAAGCCGACACAATAGGCATTGCGATGCGAAGAGCTTTACT  
TGGAGAAATAGAAGGAACATGTATCACACGTGTAAAATTTGAGAAAGTACCACATGAATATTCTACCATAACGGGCATT  
AAGAATCGGTACATGAAATTATAATGAATTTGAAAGAAATTTGATTGAGAAGTAATCTATATGGAACCTCTGAG---  
GCGTCTGTTTGTGTCAGGGTCTGGATATGTAAGTCTCAAGATATCATCTTGCCGCTTATGTAGAAATCGTTGATAA  
TACACAACATATAGCTAGTTTAAACGGAACCAATTGATTTTTGTATTGGATTACAAATAGAGAGAAATCGTGGATATCTTA  
TAAAAACGCCA---CAAACCTTTCAAGATGGA---AGTTATCCT-----  
ATAGATGCTGTATTTCATGCCTGTTTCGAAACGCGAATCATAGTATTCATTCTTATGGGAATGGGAATGAA-----  
AAACAAGAGATA

Buxus

GTGTACTAGCTAAAGCGTTACGCATGTCTGGCGGAGATCATATTCACGCTGGTACCGTAGTAGGTAACTTTGAAGGGGAA  
AGAGACATAACTTTGGGCTTTGTTGATTTACTACGCGATGATTTTTATTGAAAAGACCGAAGTCGCGGTATTTATTTTAC  
TCAAGATTGGGTCTCTACCTGGCGTTCTGCCCGTGGCTTCCGGGGTATTACGTTTTGGCATATGCCTGCTCTGACCG



ATGAAAATAAGGGCCTCCGTTTCGTAAAATTTGTGAAAAATGTCGACTAATCCGTAGGCGTGGACGAATTATAGTAATTTG  
TTCC---AACCCGAGACATAAACAAAGACAAGGA-----ATGGTT-----  
CGAGAAGAAGTAAGAGTATGTACT-----CGGACACTACAGTGGAAAGTGTGTTGAATCA---AGAGCAGAC---  
AATAAGCGTCTT---  
TATTATGGACGTTTTATTCTGTCTCCACTTATGAAAGGTCAAGCTGATACGATAGGCATCGCGATGCGGAGGGCTTTGCT  
TGGAGAAATAGAAGGAACATGTATCACATGTGCAAAATCTGAGAAAATACCACACGAATATTCTAACATAGTAGGTATTG  
AAGAATCAGTACATGAAATTTAATGAATTTGAAAGAAATTTGTATTGAGAAGTAATTTGTATGGAACCTCGCGAC---  
GCGTCTATTTGCGTCAGGGGTCTTAGACACGTAACCGCTCAAGACATCATCTCACCGCCTTCTGTAGAAATCATTGATAC  
TACACAGCATATAGCTAGCCTGACAGAACCAATTGATTTGTGTATTGGATTACAAATCGAGAGGAATCGCGGATATAATA  
TGAAAACACCG---AAAACTCTCAAGATGGA---CGTTATCCT-----  
ATAGATGCTGTATTTATGCCTGTTTCGAAATGCGAATCATAGTATTTCATTCTTATGGGAATGGGAATGAG-----  
AAACAAGAGATA

*Calycanthus*

GTGTAAGTACTAGCTAAAGCGTTACGTATGTCTGGTGGAGATCATATTCACGCTGGTACCGTAGTAGGTAAGTAACTGGAAGGGGAA  
CGGGAGATCACTTTGGGTTTTGTTGATTTACTACGTGATGATTTTTATTGAAAAAGACCGAAGTCGCGGCATTTATTTTAC  
TCAAGATTGGGTCTCTATGCCAGGTGTTCTGCCCGTGGCTTCAGGGGGTATTACGTTTTGGCATATGCCTGCCCTGACCG  
AGATCTTTGGGGATGATTCCGTAACAGTTCGGTGGAGGAACCTTAGGACACCCCTTGGGGAAACGCGCCTGGTGCAGTA  
GCTAATCGGGTGGCTTTAGAAGCGTGTGTACAAGCTCGTAATGAGGGACGTAATCTTGCTCGTGAAGGTAATGAAATTAT  
CCGTGAAGCTAGCAAATGGAGCCCTGAACTAGCC---GCTGCTTGTGAG---GTATGG---AAGGAGATCAAATTCGAA-  
--TTCGAGGCAATGGATACCTTG-----  
ATGGCGATACATTTATACAAAACCTTCTACCCCGAGCACACGCAATGGAGCCGTA-----GACGGT-----  
CAAGTGAAATCCAATCCACGAAAC-----  
AATTTGATCTATGGACAGCATCATTGTAGTAAGGGTGCATAATGCTAGAGGAATCATTACCGCAAGGCATAGAGGGGGAGG  
TCATAAGCGTCTATACCGTAAAATCGATTTTCGACGGAATGAAAA---GACATATCTGGTAGAATC-----  
--

GTAACCATAGAATACGACCCTAATCGAAATGCATACATTTGTCTCATACTATGGGGATGGTGGAGAAAAGATATATTTT  
ACATCCCAGAGGGGCTATAAATGGAGATACCATTGTTTCTGGT-----ACAGAAGTTCCTATATCAATG-----  
-----GGAATGCCCTACCTTTG-----  
ACCGACATGCCCTTAGGCACGGCCATACATAACATAGAAATCACACTTGGAAAGGGTGGACAATTAGCTAGAGCCGCAGG  
TGCTGTAGCGAAACTGATTGCAAAAGAGGGTAAATCGGCCACATTAAGATTACCATCTGGGGAGGTCCGTTTTGATATCCA  
AAAACCTGCTCAGCAACAGTCGGACAAGTGGGTAATGTTGGGGTGAACCAGAAAAGTTTGGGTAGAGCCGGATCTAAGCGT  
TGGCTAGGTAAGCGTCTGTAGTAAGAGGAGTAGTTATGAACCCTGTAGACCATCCCCATGGGGGTGGTGAAGGGAGAGC  
CCCGATTGGTAGAAAAAACCCACAACCCCTTGGGGTTATCCTGCGCTTGGAAAGAAGTAGGAAAAGGAATAAATATA  
GTGATAGTTTTATTCTTCGTCGCCGT---AAA-----  
ATGATTCAACCTCAGACCCATTTGAATGTAGCGGACAACAGCGGGGCTCGAGAATTGATGTGCATTGCAATCATAGGGGC  
T---

AGTAATCGCCGATATGCTCATATCGGTGACGTTATTGTTGCTGTAATCAAAGAAGCAGTGCCCAATATGCCTCTCGAAAG  
ATCAGAAGTTATTCGAGCTGTAATTGTACGTACATGTAAAGAACTCAAACGCGACAACGGTATGATAATACGATATGATG  
ACAATGCGGCAGTTGTCATTGATCAAGAAGGA---  
AATCCAAAAGGAACTCGAGTTTTTGGAGCGATTGCTCGGGAATTGAGAAAAGTTAAATTTCACTAAAATAGTCTCATTAGC  
CCCTGAAGTCTTA---ATGCTTAGT---  
CCCAAAAGAACCAGATTTTCGTAAACAACATAGAGGAAGAATGAAGGGAATATCTTATCGAGGCAATCATATTTGTTTCGG  
TAGATACGCTCTTCAAGCACTTGAACCCCTCTGGATCACATCTAGACAAATAGAAGCAGGGCGACGAGCAATGACACGAT  
ATGCGCGCCGTGGCGGAAAAATATGGGTACGTATATTTCCCAGCAACCCGTTACAGTAAGACCTACGGAAACACGTATG  
GGTTCGGGAAAGGATCCCCGAATATTGGGTATCTGTGCTTAAACCAGGTCGAATACTTTATGAAATGGGCGGAGTATC  
CGAAACTGTAGCCAGAGCGGCTATTTCAATAGCTGCGTGCAAAATGCCTATACGAACTCAATTCATTATCGCGAGA----  
-----

ATGACCAGAATTAGACGAGGATATATAGCTCGGCGACGTGCAACAAAAATTCGTTTTATTGTCATCAACCTTTTCGAGGGGC  
TCATTCAAGACTTACTCGAACTATTACTCAACAGAAAATGAGAGCTTTGGTTTTCCACTCAGCGGGATAGAGGCAGGCGAA  
AGAGAGATTTTCGTCGTTTTGTGGATCACTCGCATAAATGCAGTAACCTCGTGAGAAT-----  
AGGGTATCCTATAGTTATAGTAGATTAATACATGATCTGTACAAGAAGCGGTTGCTTCTTAATCGTAAAATACTTGCA--  
-----CAAATAGCTATATCAAATAGGAATTGTCTCGACACAATTTCCAATGAGATTCTCAA-----  
-----

ATGTCATCCAAGAAAAAGCAGAAAATGAAGAGG-----  
AGCTCGAGTACACAAGTACAAGCTTTAGCTCAACAT---  
ATATCTATGTCTGCTCACAAGCACGAAGAGTCTGTTGATCAGATTCGTGGACGTTCCCTATGCGGAAACACTTATGCTACT  
GGAACCTATGCCTTATCGAGCATCTTATCCATTTTTAAACTGGTTTTATTCTGCAGCAGCAAATGCTAGTCACAATAAGA

GTTTTAACGAAGCTGATTCATTTCATTAGTAAAGCCGAAGTCAATGGGGTACTATCGTGAAAAAGTTTAAACCTCGGGCT  
AAAGGACGTAGTTACCCGATAAAAAGACCCACCTGTTCATATAACTATTGTATTGAAAGATAGATCTAAAAAGAAA---  
ACGGATCAGGATATGTTTTTA-----GGAACAAAAATGTATAG-----  
-----

ATGGATGGAATCAAATATGCAGTCTTTACAGAAAAGAGTATTCGGTTATTGGGG---  
AACAAATCAATATACTTCTAATGTGCAATCAGGATCAACTAGGACAGAAATAAAGCATTGGGTGCAACTCTTCTTTGGTGT  
CAAGGTAATAGCTATGAATAGTCATCGACTC-----CCGGGAAAG-----GGTAGAAGAATG-----  
GGACATACAATGCATTACAGACGTATGATCATTACGCTTCAACCGGGTATTCTATTCCACCTCTTATAGAGAAAAGAAC  
TTAA-----

ATGGCGGTTCCAAAGAAACGTACTTCTGTGTCAAAAAAGCATATTCGTAGAAATATTTGGAAGAGA---  
AAGGGATATCGGGCCGCGTCAAAAGCTTTGTCTTTAGCTAAATCG-----ATTTCTACCGGACAT-----  
TCAAAGAGTTTTTTTT-----GTGCGACAAACAAGTAATAAAGCC---  
TTGGAA-----

ATGGCCAAG---GGTAAAGATGTC---AGAGTCATAATTATTTTGAATGTACCGGTTGTGCC-----  
CGAAATGGTTTTGAAT-----

AAAGAATCGAGGGGCATTTCCAGATATATTACTCAAAAAATCGACACAATACACCTAGTCGATTGGAATTGAAAAAATT  
CTGTTCTTATTGTTACAAGCATAACGATTTCATGCGGAGATAAAGAAA-----

ATGAAAATAAGGGCCTCCGTTTCGTAATAATTTGTGAAAAATGTCGACTAATCCGTAGGCGGGGACGAATTATAGTAATTTG  
TTCC---AATCCGAGACATAAACAGAGACAAGGG-----ATGGTT-----

CGAGAGGAAGTGGCAGTATCCACT-----CGGACACTACAGTGAAGTGTGTTGAATCA---AGAACAGAC---  
AGTAATCGTCTT---

TATTATGGACGTTTTCGTTTTGTCCCCGCTTATGAAAGGTCAAGCGGATACGATAGGTATCGCGATGAGAAAGGCTTTACT  
TGGGGAAATAGAAGGAACATGTATAACACGCGCAAAATCTGAGAAGGTACCGCATGAATATTCTACAATAGTTGGTATTG

AAGAATCAGTACATGAAATTTAATGAATTTGAAAGAAATTTGTATTAATAAGTAATCTGTATGGAACCTCGTGAC---  
GCATCCATTTGCGTCAGGGGTCCTAAATACGTAACCTGCTCAAGATATCATCTCACCGCCTTCTGTGGAAATAGTTGATAC

TACACAACATATAGCTAGCCTGACGGAGCCAATTAATTTGTGTATTGAATTACAAATCGAGAGGGATCGCGGATATCGTA  
TGAAAGCCCCA---AATAACTATCAAGATGGA---AGTTATCCT-----

ATAGATGCCGTATCCATGCCTGTTTCGAAATGCGAATCATAGTATTTCATTCTTATGGGAGTGGGAATGAG-----  
AAACAAGAGATA

Ceratophyllum

GTGTATTAGCGAAAGCATTACGTATGTCTGGAGGAGATCATATTCACTCTGGTACCGTAGTAGGTAAACTGGAAGGAGAA  
CGAGATATTACTTTGGGTTTTGTTGATTTATTACGTGATGATTTTATTGAAAAAGACCGAAGTCGCGGTATTTATTTTAC

TCAAGATTGGGTCTCTATGCCAGGCGTTCTGCCTGTAGCTTCAGGGGGTATTCATGTTTGGCATATGCCTGCTCTGACCG  
AGATCTTTGGGGATGATTCCGTAACAGTTCGGTGGAGGAACCTTTAGGACACCCTTGGGGAAATGCACCGGGTGCAGTA

GCTAATAGGGTGGCTTTAGAAGCGTGTGTAAGGCTCGTAACGAAGGACGCGATCTTGCTCGTGAAGGTAATGAAGTTAT  
CCGTGAAGCTAGCAAATGGAGTCCAGAAGTAGCT---GCTGCTTGTGAG---GTATGG---AAGGAGATCAAATTCGAA-

---TTCCCCGCAATGGATACCGTCTAA-----  
ACGGCGATACATTTATACAAAACCTTCTACCCCGAGCACACGCAATGGATCCGTA-----GACAGT-----  
AAAGTGAAATCCAATCCACGAAAT-----

AATTTGATCTATGGACAGCATCATTGTGGTAAAGGTCGTAATGCCAGAGGAATCATTACCGCAGGGCATAGAGGGGGAGG  
TCATAAGCGTCTATACCGTAAATCGATTTTCGACGAAATGAAAA---GACATCTCTGGTAGAATC-----  
--

GTAACCATAGAATACGACCCTAATCGAAATGCATACATTTGTCTCATACTATGGGGATGGTGAGAAGAGATATATTTT  
ACATCCCAGAGGGGCTATAATTGGAGATACCGTTGTTTCTGGT-----ACAGAAGTTCCTATATCCATG-----  
-----GAAATGCCCTACCTTTG-----

ACCGATATGCCCTTAGGCACGGCCATACATAACGTAGAAATTACACTTGAAGGGGTGGACAATTAGCTAGAGCAGCAGG  
TGCTGTAGCGAAACTGATTGCAAAAGAGGGTAAATCGGCCACATTAAGATTACCGTCTGGAGAGGTCCGTTTGATATCCA

AAAACCTGCTCAGCAACAGTCGACAAAGTGGGCAATGTTGGGGTGAACCAGAAAAGGTTGGGTAGAGCCGGATCTAAGTGT  
TGGCTAGGTAAGCGTCTGTAGTAAGAGGAGTAGTTATGAACCCTGTAGACCATCCCCATGGGGGTGGTGAAGGGAGGGC

CCCAATCGGTAGAAAAAACCCGCAACCCCTTGGGGTTATCCTGCGCTTGGCAGAAGAAGTAGGAAAAGGAAAAAATATA  
GTGATAGTTTGATTCTTCGTCGCCGT---AAATAG-----

ATGATTCAACCTCAGACCCATTTGAATGTAGCGGACAACAGCGGGGCTCGAGAATTGATGTGTATTGCAATCCTAGGAGC  
T---

AGTAATCATCGATATGCTCATATTTGGTGTGTTATTGTTGCTGTAATAAAGGAAGCCGTACCCAATATGCCTCTAGAAAG  
ATCAGAAGTGGTCAGAGCTGTAATTGTACGTACATGTAAGAAGTCAAACGTGACAACGGTATGATAATACGATATGATG

ACAATGCAGCAGTTGTCATTGATCAGGAAGGA---

AATCCAAAGGGAACCTCGCGTTTTTGGTGCGATCGCGCGAGAATTAAGACAGTTGAATTTTCGCTAAAATAGTCTCATTAGC  
CCCTGAGGTTTTATAAATGCTTAGT---  
CCAAAAAGAACGAGATTCCGTAACAACATAGAGGAAGAATGAAGGGAATATCTTCTAGAGGCAATCGTATTTGTTTCGG  
TAGATACGCTCTTCAAGCACTTGAACCCGCTTGGATTACATCTAGACAAATAGAAGCGGGACGGCGAGCAATGACACGAT  
ATGCGCGTCGTGGTGGAAAAATATGGGTACGTATATTTCCCGACAAACCTGTTACGGTAAGACCGACGGAAACACGTATG  
GGTTCTGGAAAAGGATCTCCTGAATATTGGGTATCCGTCGTTAAACCGGGTTCGAATACTTTATGAAATGGGTGGAATATC  
AGAAACAGTAGCCAGAGCAGCTATTGAGATAGCTGCGTCCAAAATGCCTATACGAACCTCAATTCGTTATTGCGGGATAG-  
-----  
ATGACCAGAGTAAAACGAGGATATATTGCTCGGAGACGTGCAACAAAAAATTCGTTTATTTGCATCAACCTTTTCGAGGGGC  
TCATTCAGACTTACCCGAACCTCAACTCAACAGAAAAATGAGAGCTTTAGTTTCTACTCATCGGGATAGAGGCAGGCAAA  
AAAGGGATTTTCGTCGTTTGTGGATCACTCGAATAAATGCAGTAACTCATGAGAAT-----  
AGGGTATCCTATAGTTATAGTCGATTAATACATGATCTGTATAAGAAGCAATTGCTTCTTAATCGTAAAATACTTGCA--  
-----CAAATAGCTATATCAAATAGGAATTGCCTTTACACGATTTGCAATGAGAGCATCAAATAA-----  
-----  
ATGAAAAAAGG-----  
AAATCGCGTACAGAAGTCAAAGCTGTAGCTCAATAT---  
ATACATATGTCTGCTCATAAAGCACGAAGAGTCTGTTGATCAGATTTCGTGGGCGTTCCTATGAGGAAACACTTATGATACT  
GGAACCTTATGCCTTATCGGGCATCTTATCCCATTTTTAAATTGGTTTTATTCTGCAGCAGCAAATGCTAATCACAATATGG  
GTTTTAACGAAGCTGATTCATTTATTAGTAAAGCCGAAGTAAATGAGGGTGTATTGTTAAAAAGTTAAACCCCTCAGGCT  
AGAGGACGTAGTTATACCATAAAAAGATCGACCTGTATATAACAATTGTATTGAAGGATAGAACGAAAAAGGAA-----  
-----CCCACTTCCATTTTAGAA-----  
AGAAGATATGGA---TGG-----GTAGATGAGTAT---AAGATAAAG-----  
-----TATAGTAGATA-----  
--ATGGATGGAATCAAATATGCAGTATTTACAGAAAAAGTATTCGGTTATTGGGG---  
AACAAATCAATATACTTCTAATGTGCAATCAGGATCAACTAGGACAGAAATAAAGCATTGGGTTGAACTCTTCTTTGGTGT  
CAAGGTAATAGCTATGAATAGTCACCGACTC-----CCCCGAAAG-----  
GGTAAAAGAATGGGACCTATTAGGGGACATACAATGCATTACAGACGTATGATTATTACGCTTCAACCGGGTTATTCTAT  
TCCACCTCTTATAGAGAAAAAGAACTTAA-----  
ATGGCGGTTCCAAAGAAACGTACTTCTATATCAAAAAACGTATTCGTAATAAATTTTGGAAAGAGA---  
AAAGGATCTAGTGTGCTGCCTTAAAGGCTTTTTCTTTAGCAAAATCT-----CTTTCTACTGGGCAT-----  
TCAAAGAGTTTTTTTT-----GTGCGACAA-----ACG--  
-AGTAAT---AAAACCTTGAATAA-----  
ATGGCCAAG---GGTAAAGATGTC---AGAGTGAGAGTGATTTTGGAAATGTACCAGTTGTGCC-----  
AGAAATGGTGGCAAT-----  
AAGGAATCGCGGGGCATTTCCAGATATATTACTCAAAGAATCGACACAATACACCTAGTTCGATTGGAATTGAGAAAATT  
CTGTCCCTATTGTTACAAGCATACAACTCATGGGGAAATCAAGAAATAG-----  
ATGAAAATAAGGGCCTCTGTTTCGTAATAAATTTGTGAAAAATGTCGACTGATCCGTAGGCGAGGGCGAATTATAGTAATTTG  
TTCC---AATCCCAGACATAAACAGAGACAAGGATAA-----ATGGTT-----  
CGGGAGGAAGTAACAATATCCACT-----CGGACACTACAGTGGAAGTGTGTTGAATCA---AGAGTTGAT---  
AGTAAACGTCTT---  
TATTATGGCCGTTTCATTTTGTCCCCACTTATGAAAGGTCAAGCCGACACGATAGGTATCTCGATGCGAAGAGCTTTACT  
TGGAGAAATTGAAGGAACATGTATTACACGTGCAAAATTTGATAAGGTAACACATGAATATTCTACGATAGTAGGTATTG  
AGAATCAGTACATGAAATTTAATGAATTTGAAAGAAATTGTATTGAGAAGTAATCTGTATGGAACCTCTCGAT---  
GCCTCCATTTGTGTGTCAGGGGCCCTAGATCCGTAACCGCTCAAGATATTATCTCACCACCTTCCGTGGAAATCGTTGATAC  
TACACAGCATATAGCTAACCTGACAGAACCCATTGATTTGTGTATTGGATTACAAATCGAAAGGGATCGTGGATATCGTC  
TGAAAACACCA---AATAACTATCAAGATGGC---AGTTATCCT-----  
ATAGATACTGTATTTCATGCCTGTTTCGAAATGCCAATCATAGTATTTCATTCTTATGGGAATGGGACTGAG-----  
AAACAAGAAATA

Chloranthus

GTGTAAGTAAAGCATTACGTATGTCTGGTGGAGATCATATTCACGCCGGTACCGTAGTAGGTAAGTAACTGGAAGGGGAA  
CGGGACATCACTTTGGGTTTTGTTGATTTACTACGTGATGATTTTATTGAAAAAGACCGGAGTCGCGGTCTTTATTTTAC  
TCAAGATTGGGTCTCTCTGCCGGGTGTTCTGCCTGTGGCTTCAGGGGGTATTACGTTTTGGCATATGCCTGCCCTAACCG  
AGATCTTTGGGGATGATTCGTAACAGTTCGGTGGAGGAACTTTAGGACACCCCTTGGGGAAATGCACCTGGTGCAGTA  
GCCAATCGGGTGGCTTTAGAAGCGTGTGTACAAGCTCGTAATGAGGGACGTGATCTTGCTCGTGAAGGTAATGAAGTTAT  
TCGTGAAGCTAGCAAATGGAGCCCTGAACTAGCT---GCTGCTTGTGAG---ATATGG---AAGGAGATCAAATTCGAA-  
---TTCGAAGCAATGGATACCGT-----  
ACGGCGATACACTTATACAAAACCTTACCCCGAGCACACGCAATGGAGCCGTA-----GACAGT-----



TGGAGAAATAGAAGGAACATGTATCACACGTGCAAAATTGGATAAGGTACCACATGAGTATTCTACAATAGTAGGTATTG  
AAGAATCAATACATGAAATTTTCATGAACCTTGAAGAAAATTGTATTGAGAAGTAATCTGTATGGAACCTCGCAAC---  
GCATCTATTTGCGTCAGGGGTCTTAGATACGTAACCTGCTCAAGATATCATCTCACCACCTTCTGTGGAAATAGTTGATAC  
TACACAGCATATAGCTAGCCTGACGGAACCGATTGATTTGTGTATTGAATTACAAATCCAAAGGGATCGAGGATATCGTA  
TGAAAACCCCA---AATAAATATCAAAATGGA---AGTTATCCT-----  
ATAGATGCTGTATCCATGCCTGTTTCGAAATGCGAATCATAGTATTTCATTCTTATGGGAATGGGAATGAG-----  
AAACAAGAAATC

Citrus

GTGTACTAGCTAAAGCTTTGCGTCTGTCTGGTGGAGATCATATTCACGCCGGTACAGTAGTAGGTAAACTTGAGGGGGAA  
AGAGACATAACCTTGGGATTTGTTGATTTACTACGTGATGATTTTGTGAAAAAGATCGAAGCCGCGGTATTTATTTTAC  
TCAAGATTTGGTCTCTATAACAGGTGTTTACCTGTGGCTTCCGGGGGTATTACGTTTGGCATATGCCTGCGTTGACAG  
AGATCTTTGGAGATGATTTCCGTATTACAATTTGGTGGAGGAACTTTAGGACACCCTTGGGGAAATGCACCCGGCGCTGTA  
GCTAATCGAGTAGCTCTAGAAGCATGTGTACAAGCTCGTAATGAAGGACGCGATCTTGCTCGTGAAGGTAATGAAATTAT  
CCGGGAGGCTAGCAAATGGAGTCTGAACTGGCT---GCTGCTTGTGAA---GTCTGG---AAGTCGATCAAATTCGAA-  
---TTTGCCGCAATGGATACTTTG-----

ATGGCGATACATTTATACAAAACCTTCTACCCCGAGCACACGCAATGGAGCCGTA-----GACAGT-----  
CAAGTGAAATCCAATCCACGAAAT-----  
AATTTGATCTATGGACAGCATCGTTGTGGTAAAGGTGCGTAATGCCAGAGGAATCATTACCGCAGGGCATAGAGGGGGAGG  
TCATAAGCGTCTATACCGTAAAATCGATTTTCGACGGAATGAAAA---GACATATATGGTAGAATC-----  
--

GTAACCATAGAATACGACCCTAATCGAAATGCATACATTTGTCTCATACTATGGGGATGGTGAAGAGATATATTTT  
ACATCCCAGAGGGGCTATAATTGGAGATACCATTGTTTCTGGT-----ACAGAAGTTCCTATAAAAATG-----  
-----GGAAATGCCCTACCTTTGAGT---

ACCGATATGCCCTTAGGCACGGCCATACATAACATAGAAATCACACTTGGAAAGGGTGGACAATTAGCTAGAGCAGCGGG  
TGCTGTAGCGAAACTGATTGCAAAAGAGGGGAAATCGGCCACATTAATAATTACCTTCTGGGGAGGTCCGTTTGATATCCA  
AAAACCTGCTCAGCAACAGTCGGACAAGTGGGGAATGTTGGGGCGAACCAGAAAAGTTGGGTAGAGCCGGATCTAAATGT  
TGGCTAGGGAAGCGTCTGTAGTAAGAGGAGTAGTTATGAACCCTGTAGACCACCCCATGGGGGTGGTGAAGGAAGGGC  
TCCGATTGGTAGAAAAAGACCCGCAACCCCTTGGGGTTATCCTGCACCTTGGAAAGACGAAGTAGAAAAAGGAATAAATATA  
GTGATAATTTGATTCTTCGCCGCCGTAATAA-----

ATGATTC AACCTCAAACCCATTTGAATGTAGCAGACAATAGCGGTGCCCGAGAATTGATGTGTATTGCAATCATAGGAGC  
C---

AGTAATCGTAGATATGCTCATATTTGGTGACGTTATTGTTGCTGTGATCAAGGAAGCAGTACCCAATACGCCTCTAGAAAG  
ATCAGAAGTGATCAGAGCTGTAATTGTACGTACTTGTAAAGAACTCAGACGTGATAACGGTATGATAATACGGTACGATG  
ACAATGCTGCAGTTGTCATTGATCACGAAGGA---

AATCCAAAGGGAACCTCGAGTTTTTGGTGCATCGCCCGGGAATTGAGACAGTTGAATTTTACTAAAATAGTTTTATTAGC  
ACCTGAAGTATTA-----

AACCCCAAAGAACAAGATTCCGTAAACAACATAGAGGAAGAATGAAAGGGATATCTTATCGAGGTAATCATATTTGTTT  
CGGCAGATATGCTCTTCAAGCACTTGAACCCGCTTGGATCACATCTAGACAAATCGAAGCGGGGCGCCGCGCAATGACAC  
GAAATGTACGGCGCGGTGGAAAAATATGGGTACGTATCTTCCAGACAAACCCGTTACACTAAGACCCACGGAAACCCGT  
ATGGGGTCCGGTAAAGGATCCCCGAATATTGGGTAGCCGTCGTTAAACCGGGTAGAATACTTTATGAAATGAGTGGAGT  
AGCTGAAAATATAGCTCGAAAGGCTATTTCAATAGCGGCGTCCAAAATGCCTATAAGAACTCAATTCATTATTTCCGGGA-  
-----

ATGACCAGAATTAGACGAGGATATATAGCTCGGAGACGTAGAACA AAAATGCGTTTTATTTGTATCAAGCTTTTCGCGGGGC  
TCATTCACGACTTAGCCGAACAATTACTCAACAGAAAATAAGAGCTTTGGTTTTCGGCTCATCGCGATAGAGATAGGAAAA  
AAAGAGATTTTCGTCGTTTGTGGATCACCCGAATAAATGCAGTAATTCGCGGAAAT-----  
CTGGTATCCTATAGTTATAGTAGATTAATATAACAATCTGTATAAGGCGCAGTTGGTTCTTAATCGTAAGATACTTGCA--  
-----CAAATAGCTATATCAAATAGGAATTGTCTTTATATGATTTCCAATGAGATTATAAAA-----

ATGATAAGGATAATA-----  
AAGAAGAAGGTAGAAGTATCTGCTTTAGGTCAACAT---  
ATATGTATGTCTGCTCACAAAGCCCGAAGGGTAATTGATCAGATTCGTGGACGTTCTTACGAGGAAACCCCTTATGATACT  
CGAACTCATGCCTTATCGAGCATGTTATCCCATTTTAAAATTGGTTTTATTCTGCAGCAGCAAATGGTATTCACAATCTGG  
GTTTCAACGAAGGAAGTTTATTTCATTATTAAGCCGAA-----  
-----TAG-----  
-----  
-----

ATGGATGGAATCAAATATGCAGTATTTACAGACAAAAGTATTCGGTTATTGGGA---  
AAAAATCAATATACTTCTAATGTCTGAATCAGGATCAACTAGGACAGAAATAAAGCATTGGGTCTGAACCTCTTCTTTGGTGT  
CAAGGTAATTGCTATGAATAGTCATCAACTC-----CCCCGAAAG-----  
GGTAGAAGAATGGGACCTATTATGGCACATACAATGCATTACAGACGTATGATCATTACGCTTCAACCGGGTTATTCTAT  
TCCACCTCTTAGAAAGAAAAGAACTTAA-----  
ATGGCAGTTCACAAAAAACGTAATTTCTATATTAATAAACGTAATTCGTAAAAATCTTTGGAAAAAG---  
GGGGGGTACTGGGCAGCGTTGAAGGCTTTTTTCGTTAGCGAAATCC-----CTTGCTACTGGGAAT-----  
TCAAAAAGTTTTTTT-----TGTACAACA-----AATAAA-----  
-----  
ATGGCCAAG---GGTAAAGAGGTC---CGAGTAAGGGTTATTTTGGAAATGTACTAGTTGTGTT-----  
CGAAACGGTGTAAAT-----  
AAGGAATCAAGGGGTATTTCCAGATATATTACTCAAAGAATCGACACAATACACCCAGTCGATTGGAATTGAGAAAATT  
CTGTCCCTATTGTTACAAGCATACACTTCATGGGGAGATAAAAAA-----  
ATGAAAATAAGGGCTTCAGTTCGTAAAATTTGTGAAAAATGTGCGACTGATCCGCAGGAGGGGACGGATTATAGTAATTTG  
TTCC---AACCCGAGACATAAACAAAGACAAGGA-----ATGGTT-----  
CGAGAGAAAGTAAAGTATCTACT-----CGGACACTACAGTGGAAGTGTGTTGAATCA---AGAGCAGAC---  
AGTAAGCGTCTT---  
TATTATGGGCGCTTTATTTTGTCTCCACTTATGAAAGGTCAAGCCGACACAATAGGCATTGCGATGCGAAGAGTTTTGCT  
TGGAGAAATAGAAGGAACATGTATTACACGCGCAAAATCTGAAAAAATTCACACGAATATTCTACCATAGTGGGTATTC  
AAGAATCGGTACATGAAATTTAATGAATTTGAAAGATATTGTATTGAGAAGTAATCTTTATGGAACCTGTGAC---  
GCGCTTATTTGTGTCAAAGGCCCGGGATATGTAAGTCTCAAGACATCCTCTTGCCGCTTCTGTGGAAATCGTTGATAA  
TACGCAGCACATAGCTAGCCTAACAGAACCAATTGATTTGTCTATTGGATTACAAATCGAGAGGAGTCGAGGATATAATA  
TAAAAACGCCA---AATACCTTTCAAGACGGAAATTGTTATCCT-----  
ATCGATGCTGTATTTCATGCCTGTTTTCGAAATGCGAATCATAGTATTTCAGTCTTATGGGAATGGCAATGAA-----  
AAACAAGAGATC  
Coffea  
GCGTACTAGCTAAAGGGTTACGTATGTCTGGTGGAGATCATATTCACGCCGGTACCGTAGTAGGTAAACTTGAAGGGGAA  
AGAGATATCACTTTGGGCTTTGTTGATTTACTGCGTGATGATTTTATTGAAAAAGACCGAAGCCGCGGTATTTATTTTAC  
TCAAAGATTGGGTCTCTCTACCAGGTGTTATACCCGTGGCTTCAGGAGGTATTACGTTTTGGCATATGCCTGCTCTGACCG  
AGATTTTTGGGGATGATTCTGTACTACAGTTCGGTGGAGGAACTTTAGGACACCCTTGGGGTAATGCGCCAGGTGCTGTA  
GCGAATCGAGTAGCTCTAGAAGCATGTGTAAGGCTCGTAATGAAGGGCGTGATCTTGCTGCTGAGGGTAATGAAATTAT  
CCGCGAGGCTAGTAAATGGAGTCTGAACTAGCT---GCTGCTTGTGAG---GTATGG---AAGGAAATCCGATTTAAT-  
--TTTGAAGCGATGGATAAATTGGATAAAGAGAAA-----  
ATGGCGATACATTTATACAAAACCTTCTACCCCGAGCACACGCAATGGAAGTGA-----GACAGT-----  
CAAGTGAATCCAATCCACGAAAC-----  
AATTTGATCTATGGACAGCATCGTTGTGGTAAAGGTGCGTAATGCCAGAGGAATCATTACCGCAGGGCATAGAGGGGGAGG  
TCATAAGCGTCTATACCGTAAAATCGATTTTCGACGGACTGAAAAA---GACATATATGGTAGAATC-----  
--  
GTAACCATAGAATACGACCCTAATCGAAATGCATACATTTGTCTCATACTATGGGGATGGTGAAGAGATATATTTT  
ACATCCCAGAGGGGCTCTAATTGGAGATACCATTGTTTCTGGT-----ACAGAAGTTCCTATAAAAATG-----  
-----GGAAATGCCCTACCTTTG-----  
ACCGATATGCCCTTAGGCACGGCCATACATAACATAGAAATCACACTTGGAAAGGGTGGACAATTAGCTAGAGCAGCGGG  
TGCTGTAGCGAAACTGATTGCAAAAGAGGGTAAATCGGCCACATTAATAATTACCTTCTGGGGAGGTCCGTTTGATATCCA  
AAAATGCTCAGCAACAGTCGGACAAGTAGGGAATGTTGGGGTGAATCAGAAAAGTTTGGGTAGAGCCGGATCTAAGCGT  
TGGCTAGGTAAGCGTCTGTAGTAAGAGGAGTAGTTATGAACCCTGTAGACCATCCCCATGGAGGTGGGGAAGGGAGAGC  
TCCAATTGGTAGAAAAAAACCCACAACCCCTTGGGGTTATCCTGCCTTGGGAAGAAGAAGTAGAAAAAGGAATAAATATA  
GTGATAATTTGATTCTTCGTCGCCGTAGTAAA-----  
ATGATTAACCTCAAACCCATTTAAATGTAGCAGATAACAGCGGGGCTCGAGAATTGATGTGTATTGGAATCATAGGAGC  
T---  
AGCAATCGTTCGATATGCTCATATTGGTGTGTTATTGTTGCTGTGATCAAAGAAGCAGTACCAATATGCCCTTAGAAAG  
GTCAGAAGTCGTACAGAGCTGTAATTGTGCGTACCTGTAAAGAACTCAAACGTGACAATGGTATGATAATACGATATGATG  
ACAACGCTGCAGTTGTTATTGACCAAGAAGGA---  
AATCCAAAAGGAACTCGAATTTTTGGCGCGATCGCCCGGGAGTTGAGACAATTAATTTTTACTAAAATAGTCTCATTAGC  
TCCCGAGGTATTA---ATGCTTAGT---  
CCCAAAAAGAACCAGATTCGGTAAACAACATAGAGGAAGAATGAAAGGAATATCTTATCGAGGGAATCGTATATGTTTCGG  
TAAATTTGCTCTTCAGGCACCTTGAACCCGCTTGGATCACATCTAGACAGATAGAAGCAGGTCGACGAGCAATGACACGAA  
ATGTACGCCGTGGTGGAAAAATATGGGTACGTATATTTCCAGACAAACCGATTACAGCGAGACCTGCCGAGACACGTATG



GGTTCGGGGAAAGGATCCCCGAATATTGGGTAGCTGTTGTTAAACCGGGTCAATACTTTATGAAATGGGTGGAGTAAC  
AGAACATATAGCTAGAAAGGGCTATTTCAATAGCAGCATCCAAAATGCCTATACGGACTCAATTCATTATTTTCGAGA----

-----  
ATGACTAGAATTAGACGGGGATATATAGCTCGGAGACGTAGAACAAAAAATTCGTTTTATTTGCATCAAGCTTTTCGGGGGGC  
CCATTCAAGACTTACGCGAACTATTACTCAACAAAAAATAAAAGCTTTGGTTTTTCGGCTCATCGAGATCGGGATAGTAAAA  
AGAGAAATTTTCGTCGTTTTGTGGATCATTTCGGATAAACGCAATAATTCGTGAAAGA-----  
GTAGTAGAATGGGCACATCCTATAGTTATAGTAGATTAATACACGATCTGTACAAGAGACAGCTGCTTCTTAATCGTAA  
AATACTTGCA-----  
CAAATAGCTATATCAAATAGGAATTGTCTTTATATGATTTCCAATGAGTTATATAAATATAAAGAAGTCGAAGAATCCAG  
TGGAATAATT-----ATGCTAAAA-----

-----AAGAAGAAAACAGAAGTATATGCTTTAGGTCAACAT---  
ATATCTATGTCTGCTGACAAAGCACGAAGAGTCATTGATCAAATTCGTGGACGTTCTACGAAGAAACACTTATAATACT  
AGAGCTCATGCCCTATCGAGCATGTTATCCCATTTTTAAATTAGTTTTATTCTGCAGCAGCAAATGCTAGTTACAATATGA  
GTTCCAACGACGCCAACTTACTCATTAGTAAAGCTGAAGTCAATGAGGGTACTACCATAAAGAAATTTAAACCCCGGGCT  
CGGGGGCGTAGTTATCCGATAAAAAGACCTACCTGCCATATAACTATTGTAATGAAAGATATATCTTTAGATGATGAATA  
CGTAAAGATAAATTCACTA-----  
AAAAAACCTAGA---TGG-----AAAAATAAACATACAGCTATGGTATATCATGATATG-----

-----  
TATAGTAGTGGAGGAGTATGGGACAAAAAATAAATGGATGGAATCAAATATGCAGTATTTACAGACAAAAGTATTCGGTT  
ATTGGGG---  
AAAAATCAATATACTTTTAATGTGCAATCGGGATCAACTAGGACAGAAATAAAGCATTGGGTGCAACTCTTCTTTGGTGT  
CAAGGTAATAGCTATGAATAGTCATCGACTT-----CCGGGAAAAG-----  
GGTAGAAGAATGGGACCTATTATGGGACATACAATGCATTACAGACGTATGATCATTACGCTTCAACCGGGTTATTCTAT  
TCCACCTCTTAGAAAGAAAAGAACTTAA-----  
ATGGCAGTTCCAAAAAAGCGTACTTCTACATCAAAAAAGCGTATTCGTAAAAATATTTGGAAAAAG---  
AAGGGATATTGGACAGCCTTAAAAGCTTTTTCTTAGGAAAATCT-----CTTTCTACTGGGAAT-----  
TCAAAAAGTTTTTTT-----GTACAGCAA-----ACA--  
---AAT---AAA-----

-----  
ATGGCCAAG---GGTAAAGACGTA---CGAGTAACGGTGATTTTGGAAATGTACCGATTGTGTT-----  
CGAAACAGTGTTAAT-----  
AAGGTATCAACGGGGATTTCCAGATATATTACTCAAAAAGAACCAGCACAAATACACCCAATCGATTAGAATTGAAAAAATT  
CTGTCCCTATTGTTACAAGCATAACGGTTCATGGGGAGATAAAGAAA-----  
ATGAAAATAAGAGCTTCTGTTTCGTAAAATTTGTGACAAATGTGCGACTAATCCGCAGGCGAGGGCGAATTATAGTAATTTG  
TTCC---AACCCGAGACATAAAACAAAGACAGGGA-----ATGGTT-----  
CGAGAGAAAATAACAGTATCTACT-----CGGACACTAGAGTGGAAGTGTGTTGAATTA---AGAACAGAC---  
AGTAAACGTCTT---  
TATTATGGGCGTTTTATTCTGTCTCCACTGATGAAAGGTCAAGCCGACACAATAGGCATTGCAATGCGACGAGCTTTGCT  
TGGAGAAATAGAAGGAACATGTATCACACGTGTAATACTGAGAAAGTCGCACATGAATATTCTACCATAGCGGGTATTC  
AGAATCGGTACATGAAATCTTAATGAATTTGAAAGAAATTTGATTTCAGAAGTAATCTATATGGAACCTTGTGAT---  
GCATCTATTTGTGTCAGGGGTCCTGGATATGTAAGTCTCAAGATATCGTCTTACCGCCTTATGTAGAAATCGTTGATAA  
TACACAACATATAGCTAGATTGATGGAACCAATCAATTTGTGATATTAGATTAGAAATCGAGAGAAATCGAGGATATCTTA  
TAAAAACGCCA---CAGAACTTTCAAGATGGA---AGTTATCTT-----  
ATAGATGCTGTATTTATGCCTATTCGAAATGCGAATTATAGTATTCATTCTTATGGGAATGGGAATGAA-----  
AAACAAGAGATA

Cucumis

GTGTACTAGCTAAAGCGTTACGTATGTCTGGTGGAGACCATATTCACGCTGGTACCGTAGTAGGTAACCTTGAAGGGGAA  
AGAGAAATCACTTTAGGCTTTGTTGATTTACTACGTGATGATTTTGTGAAAAGACCGAAGCCGCGGTATTTATTTTAC  
TCAAGATTGGGTCTCTTTACCAGGTGTTCTGCCAGTGGCTTCCGGTGGTATTACGTTTTGGCATATGCCTGCTCTAACCG  
AGATTTTTGGAGATGATTCTGTAACAATTTCGGCGGAGGAACCTTTGGGGCACCTTGGGGTAATGCACCTGGTGCCGTA  
GCTAACCGAGTAGCTCTAGAAGCATGTGTACAAGCTCGTAATGAGGGACGTGATCTTGCTCGTGAGGGTAATGAAATTAT  
CCGTGAGGCTAGTAAATGGAGTCTGAACTAGTCTGCGTGACTTG-GAGGAAGTATGGT--AAGGAGATCAAATTTGAA-  
--TTTGAGGCAATGGATACTTTG-----

ATGGCGATACATTTATACAAAACCTTCTACCCCGAGCACACGCAATGGAGCCGTA-----GACAGT-----  
CAAGTAAAATCCAATCCACGAAAT-----  
AATTTGATCTATGGACAGCATCGTTGTGGTAAAGGTGCGTAATGCCAGAGGAATCATTACCGCAGGGCATAGAGGGGGAGG  
TCATAAGCGTCTATACCGTAAAATCGATTTTCGACGGAATGAAAA---GACATATATGGTAGAATC-----  
--

GTAACCATAGAATACGACCCTAATCGAAATGCATACATTTGTCTCATACTATGGGGATGGTGAGAAAAGATATATTTT  
ACATCCCAGAGGGGCTATAATTGGAGATACCATTGTTTCTGGT-----ACAGAAGTTCCTATAAAAATG-----  
-----GGAAATGCCCTACCTTTG-----  
ACCGATATGCCCTTAGGCACGGCCATACATAACATAGAAATCACACTTGGGAAGGGGGGACAATTAGCTAGAGCAGCAGG  
TGCTGTAGCGAAACTGATTGCAAAAGAGGGGAAATCGGCCACATTAATAATTACCTTCTGGGGAGGTCCGTTTGATATCCA  
AAAATTGCTCAGCAACAGTCCGACAAGTGGGGAATGCTGGGGTAAACCAGAAAAGTTTGGGTAGAGCCGGATCTAAATGT  
TGGCTAGGTAAGCGTCTGTAGTAAGAGGAGTAGTTATGAACCCTGTAGACCATCCCCATGGGGGTGGTGAAGGGAGGGC  
CCCAATTGGTAGAAAAAACCCGCAACCCCTTGGGGTTATCCTGCACTTGGGAAGAAGAAGTAGAAAAAGGAATAAATATA  
GTGATAATTTGATTCTTCGTCGCCGTAGTAAA-----  
ATGATTCAACCTCAAACCTTTTGAATGTAGCAGATAACAGCGGAGCCCAGAAATTGATGTGTATTTCGAATCATAGGGGC  
T---  
AGTAATCGACGATATGCTCATATTGGTGACGTTATTGTTGCTGTAATCAAGAAAGCCGTCCCAAATACACCTTTAGAAAG  
ATCAGAAGTGATCAGAGCTGTAATTGTACGTACTTGTAAAGAACTCAAACGAGAAAATGGTATGATAATACGATATGATG  
ACAATGCTGCGGTTGTTATTGATCAAGAAGGA---  
AATCCAAAAGGAACTCGAATTTTTGGTGCGATTGCCCGAGAATTGAGACAGTTAAATTTACAAAAATAATTTTCATTAGC  
ACCTGAAGTATTA---ATGCTTAGT---  
CCTAAAAGAACCAGATTCCGTAAACACCATAGAGGAAGAATGAAAGGAATATCTTATCGAGGCAATAGTATTTGCTTCGG  
GAGATACGCTATTTCAGGCACCTTGAACCCGCTTGGATCACATCTAGACAAATCGAAGCCGGACGAAGGGCAATGACACGAA  
ATGCACGACGCGGTGGAAAAATATGGGTACGTATATTTCCAGACAAACCCGTTACTACTAAGACCCACAGAAACACGTATG  
GGTTCAGGGAAAGGATCCCCGAATATTGGGTAGCTGTTGTTAAACCAGGTAGAATACTTTATGAAATGAGTGGAGTAGC  
CGAAAATATAGCCAGAAAAGCTATTTCAATAGCGGCATCCAAAATGCCTATACGAACCCAATTCATTACTTCGGGA----  
-----  
ATGACTAGAATTAACGAGGATATATAGCTCGGAGACGTAGAACAAAAATTCGTTTATTTGCATCAAGCTTTCGAGGGGC  
TCATTCAAGACTTACTCGAACTATTACTCAACAGAAAATAAGAGCTTTGGCTTCAGCTTATCGGGATAGAGGTAGGCAAA  
AAAGAAATTTTCGACAGTTGTGGATCGCTCGAATAAATGCAGTAATTCGATCTAAT-----  
AATGTAGACTACAGTTATAGTAGATTACATACACAATCTGTACAAGAGGCAGTTGCTTCTTAATCGTAAAATACTTGCC--  
-----CAAATCGCGATATTAATAGAAATTGTCTTTATATGATTTCCAATGAGATCATAAAA-----  
-----  
ATGATAAAGACGAAAAAA-----AATCGATAT---  
GAAGTATACGCTTTAGGTCAACAT---  
ATATGTATGTCCCCTCACAAAGCGCAAGAGTAATTGATCAGATTTCGTGGCCGTTCTTACGAAGAAACAATGATGATACT  
CGAACTCATGCCTTATCGAGCATGTTATCCAATTTTAAAATTGGTTTTATTTCGGCAGCAGCAAATGCTAGTCACAATATGG  
GTTTTAACGAAAGAGATTTAGTCATTAGTAAAGCAGAAGTTAATCAAGGTACTACTGTGAAAAAATTAACCTCGAGCT  
CAAGGGCGAAGTTATCCCATAAAACGACCCACTTGTCTATAACTATTGTATTGAAAAATACATCTGTGAATGAAGAAGA  
GTTTTAAAAGATAACCAATAC-----ACCATAAACCAACT-----  
GGTGGATTGATA---ACT-----AAAGAAAAGTACACAGATATGAGGTGTTATGACATG-----  
-----  
TATAATAATGGGGGATTATGGGACAAAAAATAAATGGATGGAATCAAATATGCAGTATTTACAGACAAAAGTATTCGGTT  
ATTGGGG---  
AAAAATCAATATACTTCTAATGTGCAATCAGGATCAACTAGGACAGAAATAAAGCATTGGGTGCAACTCTTCTTTGGTGT  
CAAGGTAATAGCTATGAATAGTCATCGACTC-----CCGGGAAAG-----  
GGTAGAAGAATGGGACCTATTATGGGACATACAATGCATTACAGACGTATGATCATTACGCTTCAACCGGGTTATTCTAT  
TCCACCTCTTAGAAAGAAAAGAACTTAA-----  
ATGGCACTTCCAAAAAGCGCACTTCTATATCAAAAAACGGATTTCGGAAAAATATTTGGAAAAGC---  
AAAGGGCGTTCGGGCAGCGCTGAAAGCTTTTTCCCCAGCAAAATCT-----CTTTCAACGGGTAAT-----  
TCAAAAAGTTTTTG-----GGGGACAAA-----TCA--  
----AAT---AAATAC-----  
ATGGCCAAG---GGTAAAGATGCC---CGAGTAACAGTTATTTTGAA--GGACTCG-TGTGTC-----  
GAAACGGTGTTAAT-----  
AAGCAATCAATAGGGATTTCCAGATATATTACTCAAAGAATCGACACAATACGCCTAGTCGATTGGAATTGAGAAAATT  
CTGTCCCCGGTGTTACAAACATACGATTTCATGGGGAGATAAAGAAA-----  
ATGAAAATAAGGGCCTCCATTTCGTAATAATTTGTGAAAAATGTGCGTTGATCCGTAGGCGGAGACGAATTATGGTAATTTG  
TTCC---AATCCGAGACATAAACAAAGACAAGGA-----ATGGTT-----  
CGAGAGAAAATCAGAGTATCGACT-----CGGACACTAAAGTGGAAAGTGTGTTGAATCA---AGAGCAGAC---  
AGTAAGCGTCTT---  
TATTATGGACGCTTTATTCTGTCTCCACTTATGAAGGGGCAAGGGGATACTATAGGCATTGCGATGCGAAAAGCTTTGCT  
TGGAGAAATAGAGGGAACATGTATCACACGTGCAAAATCTGAAAAATCCCACATGAATACTCTACCATAGTCGGTATTC

AAGAATCAGTACATGAAATTTTAAATGAATTTGAAAGAAATTGTATTGAGAAGTAATCTGTATGGAACCTCGTGAT---  
GCGTCTATTTGTGTCAAGGGTCTGGATGCGTAACTGCTCAAGACATCATCTTACCACCTTCGGTGGAAATCGTTGATAA  
TACACAGCATATAGCTAACCTAATGGAACCAATTAATTTGTGTATTGAATTAAGATCGAGAGGAATCGCGGATATCATA  
TACAAACGCCA---AATAATTTTCAAGACGCA---AGTTATCCT-----  
ATGGATGCTATATTCATGCCTGTTTGCAAATGTTAATCATAGTATACATTCTTATGTAAATGGGAATGAA-----  
AAACAAGAGATA

Daucus

GTGTACTAGCTAAAGCGTTACGTATGTCTGGTGGAGATCATATTCACTCCGGTACCGTAGTAGGTAACTTGAAGGGGAA  
AGAGACATCACTCTGGGCTTTGTTCGATTTACTGCGTGATGATTTTATTGAAAAAGATCGAAGTCGCGGTATTTATTTTAC  
CCAAGATTGGGTCTCTTACCAGGGTGTCTACCCGTGGCTTCGGGAGGTATTCACGTTTGGCATAATGCCTGTCTGACCG  
AGATCTTTGGGGATGATTCGGTACTACAGTTCCGGTGGAGGAACCTTTAGGACACCCTTGGGGAAATGCACCCGGTCCGCTA  
GCTAATCGAGTAGCTTAGAAGCATGTGTACAAGCTCGTAATGAGGGGCGTGATCTTGTCTCGTGAAGGGAATGAGATTAT  
CCGTGAGGCTACTAAATGGAGCCCTGAACCTAGCT---GCTGCTTGTGAA---GTATGG---AAGGAGATCAAATTTGAA-  
---TTTGAAGCAATGGATACCTTG-----

ATGGCGATACATTTTATACAAAACCTTCTACCCCGAGCACACGCAATCGAACCCTGTA-----GACAGT-----  
CGAGTGAAATCCAATCCACGAAAT-----  
AATTTGATCTATGGACAGCATCGTTGTGGGAAAGGTGCGTAATGCCAGAGGAATCATTACCGCAGGGCATAGAGGGGGAGG  
TCATAAGCGTCTATACCGTAAAATAGATTTTCGACGGAATGAAAA---GACATATATGGTAGAATC-----  
--

GTAACCATAGAATACGACCCTAATCGAAATGCATACATCTGTCTCATACTATGGGGATGGTGTGAGAAGAGATATATTTT  
ACATCCCAGAGGGGCTATAATTTGGAGATACCATTGTTTCTGGT-----ACAGAAGTTTCTATAAAAAATG-----  
-----GGAAATGCCCTACCTTTG-----

ACCGATATGCCCTTAGGCACGGCCATACATAACATAGAAATCACACGTGGAAGGGGTGGACAATTAGCTAGAGCAGCGGG  
TGCTGTAGCGAAACTGATTGCAAAAGAGGGGAAATCGGCCACATTAATAATTACCTTCTGGGGAGGTCCGTTTGATATCCA  
AAAATGCTCAGCAACGGTTCGGACAAGTGGGGAATGTTGGGGTGAACCAGAAAAGTTTGGGTAGAGCCGGATCTAAGCGT  
TGGCTAGGTAAGCGTCTGTAGTAAGAGGAGTCTGTTATGAATCCTGTAGACCATCCACACGGGGGTGGTGAAGGTAGGGC  
CCCAATTTGGGAGAAAAAACCCACAACCCCTTGGGGTTATCCTGCACTTGGGAGAAGAAGTAGAAAAAGGAATAAATATA  
GTGATAATTTGATTCTTCGTCGCCGTAGTAAA-----

ATGATTCACCCCGAGACCCTTTTGAATGTAGCAGATAACAGCGGGGCTCGAGAATTGATGTGTATTTCGAATCATAGGAGC  
T---

AGCAATCGTCGATATGCTCATATCGGTGACGTTATTGTTGCTGTGATCAAAGAAGCAGTGCCAAATATGCCCTTAGCAAG  
ATCAGAGGTGGTCAGAGCTGTAATTGTACGTACTTGTAAAGAAGTCAAACGTGATAACGGTATGATAATACGATATGATG  
ACAATGCTGCGGTTGTCATTGACCAAGAAGGA---

AACCCCAAAGGAAGTTCGAATTTTGGTGAATTTGCCCGTGAATTGAGACAGTTAAATTTTACTAAAATAGTTTCATTAGC  
TCCGGAGGTATTG---ATGCTTAGT---

CCCAAAAGAACCAGATTCGGTAAACAACATAGAGGAAGAATGAAGGGAATATCTTATCGAGGTAATCATATTTCTTTTGG  
TAAATATGCTCTTCAGGCACCTTGAACCCGCTTGGATCACGTCTAGACAAATAGAAGCAGGTAGACGGGCAATGACACGAA  
ATGCACGTGCGGGTGGAAAAATTTGGGTACGTATATTTCCAGACAAACCGGTTACAGTAAGACCCGCAGAAACACGTATG  
GGTTCCGGGAAAGGATCCCCTGAATATTGGGTAGCTGTTGTTAAACCAGGTGCAATACTTTATGAAATGGGTGGAGTAAC  
AGAAAATATAGCCAGAAGAGCGATTTCAATAGCATCCTCCAAAATGCCTATACGAACTCAATTTATTATTTTCGGGA----

ATGACCAGAATTAGGCGGGGAAATATAGCTCGGAGACGTAGAACAATAATTCGTTTATTTGCATCAAGCTTTTCGAGGGGC  
TCATTCAAGACTTACTCGAACAATTACTCAACAGAAAATAAGAGCTCTGGTTTCGTCTCATCGGGATAGGGATAAGCAAA  
AGCGAAATTTTCGCCGTTTGTGGATCACTCGAATAAACGCAGTAATTCGTGAAATA-----  
GGGGTATCCTATAGTTATAGTAGATTAATACATGCCCTATATAAGAAACAGGTGCTTCTTAATCGTAAAATACTTGCA--  
-----

CAAATAGCTATATCAAATAAAAAATTGTCTTTATATGATTTCCAATGAAATCATAAAAAGAAGTCGATTGGAAAGAATCCAC  
CGGAATAATT-----ATGTTAAAGAAGTTAACG-

-----AAGATAAAAACCGAAGTATACGCTTTAGGTCAACAT---  
ATATCTATGTCTGCTCACAAAGCAAGAAGAGTGGTTGATCAAATTCGTGGACGGTCATACGAAGAAACACTTATGATACT  
AGAACTCATGCCTTATCGCGCATGTTATCCCATTTTGAATTTGGTTTACTCTGCAGCAGCAAATGCTAATTACAATATGG  
ATTCCAACGAATCCAATTTAGTTATTAGTAAAGCTGAAGTCAGCGAGGGTACTGCCACGAAAAAATTAACCTCGAGCT  
CGAGGGCGTAGTTTTACGATAAAAAGACCTACTTGGCCATATAGCTATTGTAGTGAAGATATATCATTAGATGAATATCA  
ATATCTAGGGGTAGACTTT-----

ATAGACTCTTTTCAGATGCTCAAAAAAATTTCAA---TCA-----

AAAAAGAAGTATACAGCTATGTATATCATGATATG-----  
-----

TATACTAATGGGGGATATGGGACAAAAATAAATGGATGGAATCAAATATGCAGTATTTACAGACAAAAGTATTCGGTT  
ATTGGG---  
AAAAATCAATATACTTCTAATGTCTGAATCAGGATCAACTAGGACAGAAATAAAGCATTGGGTCTGAACCTCTTCTTTGGTGT  
CAAGGTAATAGCTATGAATAGTCATCGACTT-----CCGGGAAAAG-----  
GGTAGAAGAATGGGACCTATTATGGGACAGACAATGCATTACAGACGTATGATCATTACGCTTCAACCGGGTTATTCTAT  
TCCACCTCTTAGAAAGAAAAGAACTTAA-----  
ATGGCAGTTCACAAAAAACGTACTTCTATATCAAAAAAGCGTATTCGTAAAAATATTTGGAAAGGT---  
AAGGGATCTTGGGCAGCCTTAAAAGCGTTGTCTATTAGGTAAATCT-----CTTTCTACCGGAAAC-----  
TCAAAAAGTTTTTTT-----GTTTCGACAA-----AAA--  
-AAAAAT---AAGTCA-----  
ATGGCCAAG---GGGAAAGATGTC---CGAATAACGGTTATTTTGGAAATGTACCGGTTGTGTT-----  
CGAAACGGTGTAAAT-----  
AAGGTATCAACGGGTATTTCCAGATATATTACTGAAAAGAATCGTCACAACACGCCTAATCGATTGGAATTAAGAAAATT  
CTGTCCATTTTGTGTACAAACATACGATGCATGGGGAGATAAAGAAA-----  
ATGAAAATAAGAGCTTCTGTTCGTAAAATTTGTGAAAATGTGCGACTAATCCGTAGGCGGGGACGAATTATAGTAATTTG  
TTCC---AACCCAAGACATAAAACAAAGACAAGGA-----ATGGTT-----  
CGAGAGAAAGTAACAGTATCTACT-----CGGACACTACAGTGGAAAGTGTGTTGAATCA---AAAGCAGAC---  
AATAAACGTCTT---  
TATTATGGACGCTTTATTCTGTCTCCACTTATGAAAGGTCAAGCTGACACAATAGGCATCTCGATGCGCAGAGCTTTGCT  
TGGAGAAATAGAAGGAACATGTATCACACGTGCAAAATCTGAGAAAATACCACACGAGTATTCTACCCTAGTGGGTATTC  
AAGAATCGGTACATGACATTTAATGAATTTGAAAGAAATTTGATTGAGAAGTAATCTATACGGAACCTTGCAGC---  
GCGTCTATTTGTGTGAGGGGCTCTGGATATGTAAGTGTCAAGATATAATCTTACCGCCTTATGTAGAAGTCGTTGACAA  
TACACAGCATATAGCTAGCTTGCAGGAACCCATTGAATTTGTGATTGGATTACAAATAGAGAGGAATCGCGGATATCTTA  
TAAAAACGCCAAATAATAACTCTAAAGACGGA---AGTTATCCT-----  
ATAGATGCTGTATTTCATGCCTGTTTCGAAACGCGAATCATAGTATTCTATTCTTATGGGAATGGGAATGAT-----  
AAACAAGAAATA  
Dioscorea  
GTGTACTAGCTAAAGCATTACGTATGTCTGGTGGAGATCATATTCACGCTGGTACAGTAGTAGGTAAGGAGGGGAA  
CGCGAGATGACTTTGGGTTTTGTTGATTTATTACGTGATGATTTTATTGAAAAGACCGAAGTCGCGGTATTTTTTTTAC  
TCAAGATTGGGTCTCTATGCCGGGTGTTCTGCCCGTGGCTTCTGGGGTATTTCATGTTTGGCATATGCCTGCTCTGACCG  
AAATCTTTGGGGATGATTCCGTAATAAGTTCGGTGGAGGAACCTTTGGGGCACCTTGGGGAAATGCACCTGGTGCAGTA  
GCTAATCGGGTGGCTTTAGAAGCGTGTGTACAAGCTCGTAATGAGGGACGTGACCTTGTCTGTGAAGGTAATGAAATTAT  
CCGCGAAGCTTGCAAATGGAGTCTGAACTAGCT---GCTGCTTGTGAA---GTATGG---AAGGAGATCAAATTCGAA-  
--TTCAAACAGTAGATACTACTAGACTTG-----  
ACGGCGATACATTTATACAAAACCTTCTACCCCGAGCACACGCAATGGAGCCGTA-----GACAGT-----  
CAAGTGAAATCCAATCTACGAAAT-----  
AATTTGATCTCTGGACAGCATCGTTGTGGTAAAGGTGCGTAATGCCAGAGGAATCATTACCGCAGGGCATAGAGGGGGAGG  
TCATAAGCGTCTATACCGTAAAATCGATTTTCGACGGAATGAAAA---GACATATCTGGTAGAATC-----  
--  
GTAACCATAGAATACGACCCTAATCGAAATGCATACATTTGTCTCATACACTATGGGGATGGTGAGAAGAGATATATTTT  
ACATCCCAGAGGGGCTATAATTGGAGATACCATTGTTTCTGGT-----ACAGAAGTTTCTATATCAATG-----  
-----GGAAATGCCCTACCTTTGAGT---  
ACCGATATGCCCTTAGGCACGGCCATACATAACATAGAAATCACACTTGGAAAGGGTGGACAATTAGCTAGAGCAGCGGG  
TGCTGTAGCGAAACTGATTGCAAAAGAGGGTAAATCGGCCACATTAAGATTACCATCTGGGGAGGTCCGTTTGATATCCA  
AAAATGCTTAGCAACAGTCGGACAAGTGGGTAATGTTGGGGTGAATCAAAAAGTTTGGGTAGAGCCGGATCTAAGTGT  
TGGCTAGGTAAGCGCCCTGTAGTAAGAGGAGTAGTTATGAACCCTGTAGACCATCCCCATGGGGCGGTGAAGGAAGAGC  
CCCCATTGGTAGAAAAAAACCCACAACCCCTTGGGGTTATCCTGCGCTTGGGAAGAAGAAGTAGGAAAAGAAAAAATATA  
GTGATAGTTTTATTCTTCGTGCGCGT---AAA-----  
ATGATTCACCCCAACCCCTTTTGAATGTAGCAGATAACAGCGGGGCTCGAGAATTGATGTGATTTCGAATCATAGGGGC  
A---  
GGGAATCCCCGATATGCTCATATTGGTGACGTTATTGTTGCTGTAATCAAAGAAGCAGTACCCAATATGCCTCTAGAAAG  
ATCAGAAGTAATTAGAGCTGTAATTGTACGTACATGTAAAGAAGTCAAACGTAACAACGGTATCATAATACGATATGATG  
ACAATGCAGCAGTTGTCATTGATCAAGAAGGA---  
AATCCAAAAGGAACTCGAGTTTTTGGTGCGATTCTCGGGAATTGAGACAGTTAATTTTACTAAAATAGTTTTATTAGC  
TCCCGAGGTATTA---  
ATGCTTAGTAACCCAAAAAGAACCAGATTTTCGTAAACAACATAGAGGAAGAATGAGGGGAATATCTTGTGCGAGGCAATCA  
TATTAGTTTTGGTAGATATGCTCTTCAGGCACCTGAACCCGCTTGATCACAGCTAGACAAATAGAAGCAGGGCGAAGAG

CAATGACACGATATGCGCGTCGTGGTGGAAAAATATGGGTACGTATATTTCCCGACAAACCTGTTACAGTAAGACCCACG  
GAAACACGTATGGGTTTCAGGAAAGGGATCTCCCGAATATTGGGTATCCGTTGTTAAACCGGGTCAATACTTTATGAAAT  
GAGCGGAGTATCCGAACTGTAGCTAGGACCGCTATTTTAATAGCTGCGTCCAAAATGCCTATACCAACTCAATTTGTTA  
TTACAGGA-----

ATGACCAGAGTTAGACGAGGATATACAGCTCGGAGACGTGCAATAAAAAATTCGTTTATTTGCATCAACTTTTAGGGGGGC  
TCATTCAAGACTTACTCGAACAACACTACTCAACAAAAAATGAGAGCCTTAGTTTCTTCTCATCGGGATAGAGGCAGGCAAA  
AGAGGGATTTTCGCCGTTTGTGGATCACTCGTATAAATGCAGTAACTCGCGACAAT-----  
GGGGTATTCATAGTTATAGTAAATTCATACACAATCTGTACAAGAGGCAATTGCTTCTTAATCGTAAAATACTTGCG--  
-----CAAATAGCTATAGAAAATAAAAAATTGTCTTTACATGATTTTGAATAAGATCTCTCAA-----  
-----ATAAAAGAGATTATT-----

ATGGCGGTTCCAAAAAACGTAATCTATATCAAAAAACGTATTCGTAGAAATATTTGGAAGAAA---  
AGGGGGTATTTAGCTGCAATAAAAGCTTTTTCTTTAGCTAAATCG-----GTTTCCACTAGGCAT-----  
TCAAAAAGTTTTTTT-----GTGCAACAA-----AAA--  
-ATAAT--AAAGCCCTGGAA-----

ATGGCCAAG--GGTAAGGATGTC--AGAGTCAGAATTATTTTGAATGCGCCAGTTGTGTC-----  
CGAAATGGTATCAAT-----  
AAAGAATTGCCGGGTATTTCTAGATATATTACTCAAAGAGTGCACACAATACACCTAATCGATTAGAATTAAGAAAATA  
TTGTCATATTGTGCGCACACATACAATTCATGGAGAAATAAAGAAA-----  
ATGAAAATAAGGGCTTCCGTTTCGTAAAATTTGTGAGAAATGTCGACTGATTCGTAGGCGTGGACGAATTATGGTGATTG  
TTCC--AATCCGAGACATAAACAGAGACAAGGG-----ATGGTT-----  
CGAGAGGAAATAGCAGAATCCACT-----CGAACACTACAGTGAAGTGTGTTGAATCA---CGAGTAGAC---  
AGTAAGCGTCTT---

TATTATGGACGTTTCATTCTGTCCCCGCTTATGAAAGGGCAAGCAGATACCATAGGTATCTCCATGCGAAGGGCTTTACT  
TGGAGAAATAGAAGGAACATGTATCACACGTGCAAAATCTGAGAAGGTACCACATGAATATTCTACAGTAGTAGGTATTG  
AAGAATCAGTACATGAAATTTTATTCAATTTGAAAGAAATTGTATTGAGAAGTAATCTCTATGAAATTAGAGAC---  
GCATCCATTTGTGTTAGAGGTCCTAGGTACGTAAGTCAAGATATCATCTCACCACCTTACGTGGAAATAGTTGATAC  
GACACAGTATATAGCTAACCTGACAGAACCAATTGATTTGTGCATTGAATTAGAAATCAAAGAGATCGCGGATATCGTA  
TGAAACCCATA--ACTAATTCTCAAGATGGA--AGTTATCT-----  
ATAGATGCTGTATTTCATGCCTGTTTGCAAATGCAATCATAGTATTCATTCTTATGGTAATGGGAATGAA-----  
AAACAAGAAATA

Drimys

GTGTACTAGCTAAAGCGTTACGTATGTCTGGTGGAGATCATATTCACGCTGGTACCGTAGTAGGTAAACTGGAAGGGGAA  
CGGGACATCACTTTGGGTTTTGTTGATTTACTACGTGATGATTTTATTTCAAAAAGACCGAAGTCGCGGTATTTATTTTAC  
TCAAGATTGGGTCTCTATGCCAGGTGTTCTGCCCGTAGCTTCAGGGGGTATTCACGTTTGGCATATGCCTGCCCTGACCG  
AGATCTTTGGGGATGATTCGGTACTACAGTTCCGGCGGAGGAACCTTAGGACACCCTTGGGAAATGCACCTGGTGCAGTA  
GCTAATCGGGTGGCTTTAGAAGCGTGTGTACAAGCTCGTAATGAGGGACGTGATCTTGCTCGTGAAGGTAATGAAATTAT  
CCGTGAAGCTTGCAAATGGAGCCCTGAACTAGCT---GCTGCTTGTGAG---GTATGG---AAAGAGATCAAATTCGAA-  
--TTCAAAGCAGTGGATACCTTGGATATCTTG-----

ACGGCGATACATTTATACAAAACCTTCTACCCCGAGCACACGCAATGGAGCCGTA-----GACAGT-----  
CAAGTGAAATCCAATCCACGAAAT-----

AATTTGATCTATGGACAGCATCATTGTGGTAAAGGTGCGTAATGCCAGAGGAATCATTACCGCAGGGCACAGAGGGGGAGG  
TCATAAGCGTCTATACCGTAAAATCGATTTTCGACGGAATGAAAA---GACATATCTGGTAGAATC-----  
--

GTAACCATAGAATACGACCCTAATCGAAATGCATACATTTGTCTCATACTATGGGGATGGTGAAGAGATATATTTT  
ACATCCCAGAGGGGCTATAATTGGAGATACCATTGTTTCTGGT-----ACAGAAGTTCCTATATCAATG-----

-----GGAAATGCCCTACCTTTG-----  
ACCGATATGCCCTTAGGCACGGCCATACATAACATAGAAATCACACTTGGAAAGGGTGGACAATTAGCTAGAGCAGCAGG  
TGCTGTAGCGAAACTGATTGCAAAAGAGGGTAAATCGGCCACATTAAGATTACCATCTGGGGAGGTCCGTTTGATATACA  
AAAAGTCTTAGCAACAGTCGGACAAGTGGGTAATGTTGGGGTGAACCAGAAAAATTTGGGTAGAGCCGGATCTAAGTGT  
TGGCTAGGTAAGCGTCCTGTAGTAAGAGGAGTAGCTATGAACCCTGTAGACCATCCCCATGGGGGTGGTGAAGGGAGGGC  
CCCGATTGGTAGAAAAAACCCACAACCCCTTGGGGCTATCCTGCGCTTGGGAAGAAGAAGTAGAAAAAGGAATAAATATA  
GTGATATTTATATTCTTCGTCGCCGT---AAA-----  
ATGATTCAACCTCAGACCCATTTGAATGTAGCAGACAACAGCGGGCTCGAGAATTGATGTGTATTCGAATCATCGGAGC  
T---  
AGTAATCGCCGATATGCTCATATCGGTGATGTTATTGTTGCTGTAATCAAAGAAGCAGTACCCAATATGCCTCTCCAAAG  
ATCAGAAGTGATCAGAGCTGTAATTGTACGTACATGTAAAGAAGTCAAACGTGACAACGGTATGATAATACGATATGATG  
ACAATGCAGCGGTTGTCATTGATCAAGAAGGA---  
AATCCAAAAGGAACTCGAGTTTTTGGCGCGATCGCTCGGGAATTGAGACAGTTGAATTTCACTAAAATAGTCTCATTAGC  
TCCTGAGGTATTA---  
ATGCTTAGTAACCCCAAAAGAACCAGATTCCGTAACAACATAGAGGAAGAATGAAGGGAATATCTTATCGAGGCAATTA  
TATTTGTTTCGGTAGATACGCTCTTCAGGCACCTGAACCCGCTTGGATCACATCTAGACAAATAGAAGCAGGGCGACGAG  
CAATGACACGATATGCGCGTCGTGGTGGAAAAATCTGGGTACGTATATTTCCCGACAAACCCGTTACAGTAAGACCCACA  
GAAACACGTATGGGTTTCAGGGAAGGGATCCCCCGAATATTGGGTATCCGTCGTTAAACCGGGTGAATACTTTATGAAAT  
GGGCGGAGTCTCAGAACTGTAGCCAGAGCAGCTATTGAAATAGCTGCGTGCAAAATGCCTATACGAACTCAATTCGTTA  
TTGCGGGA-----  
ATGACCAGAGTTAGGCGAGGATATATAGCTCGGAGACGTGCAACAAAAATTCGTTTATTTACATCAACCTTTTCGAGGGGC  
TCATTCAAGACTTACTCGAACTACTACTCAACAGAAAATGAGAGCTTTGGTTTCCAGTCATCGGGATAGATGCAGGCAAA  
AGAGAGATTTTCGTCGTTTGTGGATCACTCGGATAAATGCAGTAACCTCGTGAAAT-----  
AGGGTCTCCTATAGTTATAGTCGATTAATGCACGATCTGTACAAGAGGCAGTTGCTTCTTAATCGTAAAATACTTGCA--  
-----CAAATAGCTATATCAAATAGGAATTGCATTTACATGATTTCAAATGAGATTATCAA-----  
GGCGACTGGAACGAATTCACCGAAATAATT-----  
-ATGAAAAAACATAGGAAGAAGAGG-----  
AGCTCGAGTACACAAGTACAAGCTTTAGCTCAACAT---  
ATATGTATGTCTGCTCACAAAGCGGAAGAGTTATTGATCAGATTTCGTGGACGTTCCATGAGAAAACACTTATGCTACT  
AGAAGTTATGCCTTATCGAGCATCTTATCCATTTTAAAATTTGGTTTATTCTGCAGCAGCAAAATGCTAGTCACAATAAGG  
GTTTCAACAAAGCTGATTTAGTCATTAGTCAAGCCGAAGTCAATGGGGTACTATCATTAAAAAGTTAAAACCTCGGGCT  
CGAGGACATAGTTATCCGATAAAAAGACCCACCTGCCATATAAATATCGTTTGGAAAGATCAATCTAAAACGAAAACCTCA  
ACAAGATTTTCGTTTATAGAGAATAAAGGTGTATTTAAAGATACTATAATAGAGAGATATCCAGAGAAAAGAGAGAGAGAG  
AGAGAGAGATAAACTTCTTTAAACGCCTCCTTCGGTTTCCAAATTGGAATAGAGATAAA-----  
-----TAG-----  
ATGGATGGAATCAAATATGCAGTCTTTACAGAAAAAGTATTTCGGTTATTGGGG---  
AACAATCAATATACTTCTAATGTGCAATCAGGATCAACTAGGACAGAAATAAAGCATTGGGTGCAACTCTTCTTTGGTGT  
CAAGGTAATAGCTATGAATAGTCATCGACTC-----CCGGGAAAG-----  
GGTAGAAGAATGGGACCTATTATGGGACATACAATGCATTACAGACGTATGATCATTACGCTTCAACCGGGTTATTCTAT  
TCCACCTCTTATAGAGAAAAGAAGTAA-----  
ATGACGGTTCCAAAGAAACGTAATCTATGTCAAAAAGCGTATTCGCAAAAATATTTGGAAGAGA---  
AAGGGATATTGGGCCGCGTTAAAAGCTTTATCCTTGGCTAAATCT-----ATTTCTACCGGGCAT-----  
TCAAAAAGTTTTTTT-----GTGCAACA-----ACA--  
-AGTAAT---AAAGCCGCGGAA-----  
ATGGCCAAG---GGTAAAGATGTC---AGAATAAGAGTGATTTTGAATGTACCAGTTGTGTC-----  
CGAAATGATTTAAAT-----  
AAGGAATCGCGGGGCATTTCCAGATATATTAATCAAAAAGTTCGACACAATACACCTAGTCGATTGGAATTGAGAAAATT  
CTGTCTTATTGTTACAAGCATAACGATTCACGGGGAGATAAAGAAA-----  
ATGAAAATAAGGGCTTCTGTTTCGTAATAATTTGCGAAAAATGTGCGACTGATCCGTAGGCGAGGACGAATTATAGTAATTTG  
TTTC---AATCCGAGACATAAACAGAGACAAGGG-----ATGGTT-----  
CGAGAGGAAGTAGCAGTATCCACT-----CGGACACTACAGTGGAAGTGTGTTGAATCA---AGAACAGAC---  
AGTAAGCGCCTT---  
TCCTATGGACGTTTCACTTCTGTCCCCGCTTATGAAAGGTCAAGCAGATATGATAGGTATCGCTATGCGAAGGGCTTTACT  
TGGAGAAATAGAAGGAACATGTATCACACGCGCAAAATCTGATAAGATAACCACATGAATATTCTACGATAGTCGGTATTG  
AAGAATCAGTACATCAAATTTAATGAATTTGAAAGAAATTTGATTGAGAAGTAATCTGTATGGAACCTTGCAC---  
GCATCTATTTTCGTCAGGGGCTCTAGATGCGTAACTGCTCAAGATATCATCTCACCACCTTCTGTGAAAATGGTTGATAC  
TACACAGCATATAGCTAGCCTGACAGAACCCATTGATTTGTGTATTGGATTACAAATCGAGAGGGATCGCGGATATCGTA

TGAAAACCCCA---AATAATGATCAAGATGGA---  
AGTTATCCTATTTCCTATAGAGGCTGTATCCATGCCTGTTTCGAAATGCGAATCATAGTATTTCATTCTTATGGGAATGGGAA  
TGAG-----AAACAAGAAATA

Eucalyptus

GGGTACTAGCTAAAGCCTTACGTATGTCTGGTGGAGATCATATTCACGCTGGTACTGTAGTAGGTAACTTGAAGGAGAA  
AGAGACATTACTTTGGGCTTTGTTGATTTACTACGTGATGATTTTTATTGAAAAAGATCGAAGCCGCGGTATTTATTTTAC  
TCAAGATTGGGTCTCTCTACCAGGTGTTCTGCCCGTAGCTTCTGGGGGTATTACGTTTTGGCATATGCCTGCTCTGACCG  
AGATCTTTGGAGATGATTCCGTACTACAATTCGGCGGAGGAACTTTAGGACACCCTTGGGGAAATGCACCGGGTGCCGTA  
GCTAATCGAGTAGCTCTAGAAGCATGCGTACAAGCTCGTAATGAGGGACGTGATCTTGCTCGTGAGGGTAATGAAATTAT  
CCGTGAGGCTAGCAAATGGAGTCTGAACCTAGCT---GCTGCTTGTGAA---GTATGG---AAAGAGATCAAATTTGAA--  
--TTCGAAGCAATGGATACTTTG-----

ATGGCGATACATTTATACAAAACCTTACCCCGAGCACACGCAATGGAGCCGTA-----GACAGT-----  
CAAGTGAAATCCAATACACGAAAT-----

AATTTGATCTATGGACAGCATCGTTGTAGTAAAGGTGCGTAATGCCAGAGGAATCATTACCGCAGGGCATAGAGGGGGAGG  
TCATAAGCGTCTATACCGTAAATCGATTTTTCGACGGAATGAAAA---GACATATATGGTAGAATC-----  
--

GTAAGCATAGAATACGACCCTAATCGAAATGCATCCATTTGTCTCATACTATGGGGATGGTGAGAAGAGATATATTTTT  
ACATCCCAGAGGGGCTATAATTGGAGATACCATTGTTTCTGGT-----ACAGAAGTTCCTATAAAAATG-----  
-----GGAAATGCCCTACCTTTG-----

ACCGATATGCCCTTAGGCACGGCCATACATAACATAGAAATCACACTTGGAAAGGGTGGACAATTAGCTAGAGCAGCGGG  
TGCTGTAGCGAAACTGATTGCAAAAGAGGGGAAATCGGCCACATTAATAATTACCTTCTGGGGAGGTCCGTTTGATATCCA  
AAAAGTCTCAGCAACAGTCGGACAAGTGGGGAATGTTGAGGTGAACCAGAAAAAGTTGGGTAGAGCCGGATCTAAATGT  
TGGCTAGGTAAGCGTCTGTAGTAAGAGGAGTGGTTATGAACCCTGTAGACCATCCCCATGGGGGTGGTGAAGGGGAGAGC  
CCCAATTGGTAGAAAAAACCCGCAACCCTTGGGGTTATCCTGCACTTGGAAAGAAGAAGTAGAAAAAGGAAGAAATATA  
GTGATAATTTGATTCTTCGTCGCCGTAGTAAA-----

ATGATTCAACCTCAAAGCCATTTGAATGTAGCGGATAACAGCGGGGCCGAGAATTAATGTGTATTAGAATCATAGGAGC  
T---

AGTAATCGCCGATATGCTCATATCGGTGACATTATTGTTGCTGTGATCAAGGAAGCATTACCAACACACCTCTAGAAAG  
ATCAGAGGTGATCAGAGCTGTAATTGTACGTACTTGTAAAGAAGTAAACGTGACAACGGTATGATAATACGATATGATG  
ATAATGCTGCAGTTGTGATTGATCAAGAAGGA---

AATCCAAAAGGAAGTTCGAGTTTTTGGTGCATTGCCCGAGAATTGAGACAGTTAAATTTCACTAAAATAGTTTTATTAGC  
ACCTGAGGTATTA---ATGCTTAGT---

CCTAAAAGAACCAGATTTTCGAAAACAACATAGAGGAAGAATGAAAGGAATATCTTATCGAGGTAATCGTATTTGTTTCGG  
TAAATATGCTCTTCAGGCACCTGAACCCGCTTGGATCACATCTAGACAAATAGAAGCAGGGCGACGAGCAATGACAAGAA  
ATGTGCGCCGTGGTGGAAAAATATGGGTACGTATATTTCCAGACAAACCAGTTACGGTAAGACCTACGGAAACACGTATG  
GGTTCCGGTAAAGGATCTCCCGAATATTGGGTAGCTGTGCTTAAACCAGGTGCAATACTTTATGAAATGGGCGGAGTAGC  
AGAAAATATAGCCAGAAAGGCTATTTCAATAGCGGCGTCCAAAATGCCTATACGAACTCAATTTATTATTTTCGGGA----  
-----

ATGACTAGAATTAGACGAGGATATATAGCTCGGAGACGTAGAACAATAATTCGTTTTATTTGCATCAAGCTTTTCGGGGGC  
TCGTTCAAGACTTACTCGAACAATTATTCAACAGAAAATAAGATCTTTGGTTTTCGTCTCATCGAGATAGAGATAGGAAAA  
AGATAGATTTTCGTCGTTTTGTGGATCACTCGGATAAATGCAGTAATTCGCGGGAAT-----

AGAGTATCCTATAGTTATAGTAGATTAATACACAATCTGTACAAGAGACAGTTGCTTCTTAATCGTAAAATACTTGCA--  
-----CAAATAGCTATATTAATAGGAATTGTCTTTATATGATTTCTAATGAGATCAGATCA-----  
-----

ATGAGAAAAGAAGAGAAAATAAG-----

AACCTATATGGAGAAGTATATGCTTTAGGTCAACAT---

ATATCTATGTCTGCTCACAAAGCACGAAGGGTAATTGATCAGATTCGTGGACGTTCTACGAGGAAACACTTATGATACT  
CGAACTTATGCCTTATCGAGCGTGTATCCCATTTTTAAGTTGGTTTTATTCTGCAGCAGCAAATGCTAGTCATAATATGG  
GTTTTCAATGAAGCAAGTTTTAGTTATTAGTAAAGCTGAAGTCAACGAGGGTACTACTATGAAAAAATTAACCTCGAGCT  
CGAGGGCGAAGTTATGCAATAAAAAGACCCACTTGTGCATATAAGGATTGTATTGAAAGATAAATCTTTCTATGAAGAAGA  
A-----AATTTCTTTTGCTTA-----

AAACAATCCGAA---TGAAAAAAGAAAGTACACAGATATGACATATCATTATATG-----  
-----

GATAAGGGTGGGGGATTATGGGACAAAAAATAAATGGATGGAATCAAATATGCAGTATTTACAGACAAAAGTATTCGGTT  
ATTGGG---

AAAAATCAATATACTTTTAAATGTGCAATCAGGATCAACTAGGACAGAAATAAAGCATTGGGTGCAACTCTTCTTTGGTGT  
CAAGGTAAAAGCTATGAATAGTCATCGACTC-----CCGGGAAAG-----

GGTAGAAGAATGGGACCTATTCTGGGACATACAATGCATTACAGACGTATGATCATTACGCTTCAACCGGGTTATTCTAT  
TCCACCTCTTAGAAAGAAAAGAACTTAA-----  
ATGGCAGTTCCAAAAAAGTACTTCTATATCAAAAAACGTATTCGTAAAAACATTTGGAAAAAG---  
AAGGTATATCGGGCAGCGTTGAAAGCTTTTTCTTAGCGAAGTCT-----CTTTCTACCGGGAAT-----  
TCAAAAAGTTTTTTT-----TGTACGACA-----  
----ATT---AAA-----  
ATGGCCAAG---GGTAAAGATGTC---CGAGTAACGGTTATTTTAGAATGTACCAACTGTGTT-----  
AGAACCGGTCTTAAT-----  
AAGGAATCAAGGGGTGTTTTCCAGATATATTACTCAAAGAATCGACACAATACGCCTAGTCGATTGGAATTGAGAAAATT  
CTGTCCCTATTGTTACAAACATACGATTACGGGGAGATAAAGAAA-----  
ATGAAAATAAGGGCCTCCGTTTCGTAAAATTTGTGAAAAATGTCGACTGATCCGTAGAAGAGGACGAATTATAGTAATTTG  
TTCT---AATCCGAGACATAAAACAAAGACAAGGA-----ATGGTT-----  
CGAGAGAAAGTAAGAGTATCTACT-----CGGACACTACAGTGGAAAGTGTGTTGAATCA---AGAGCAGAC---  
AGTAAGCGTCTT---  
TATTATGGACGCTTTATTCTATCTCCCCTTATGAAAGGGCAAGCCGATACAATAGGCATTGCGATGCGAAGAGCTTTGCT  
TGGTGAAATAGAAGGAACATGTATCACCCGTGCAAAATTTGAAAAATACCACATGAATATTCTACCATAGTAGGTATTC  
AAGAATCAGTACATGAAATTTAATGAATTTGAAAGAAATTTGATTGAGAAGTAATCTATATGGAACCTCGCAAC---  
GCGTCTATTTGTGTCAAGGGTCTGGATGTGTAAGTCTCAAGACATCATCTTACCAACTTCTGTGGAAATCGTTGATAA  
CACACAGTATATAGCTAATCTAACGGAACCCATTAATTTGTGTATTGGATTACAAATCGAGAGGAATCGCGGATATCATA  
TAAAAACACCA---AAAACTTTCAAGATGGA---AGTTATCT-----  
ATAGATGCTGTATTTCATGCCTGTTTCGAAATGCGAATCATAGTATTATTCTTATGGGAATGGAAATGAA-----  
AAACAAGAGATA  
Ginkgo  
GTGTAAGTACTAGCTAAAGCATTGCGTATGTCTGGTGGAGATCATATTCACGCCGGTACTGTAGTAGGTAACTTGAAGGAGAA  
CGAGAAGTCACTCTGGGTTTTGTTGATCTACTGCGTGATGATTTTATTGAAAAAGACCGAAGTCGTGGTATTTATTTTAC  
TCAAGATTGGGTATCTATGCCAGGTGTTCTGCCCGTAGCTTCAGGGGGTATTACGCTCTGGCATATGCCTGCTCTGACCG  
AGATCTTTGGGGATGATTCTGTACTACAGTTTGGTGGGGGAACCTTTGGGACACCCTTGGGGAAATGCACCTGGTGCAGTA  
GCTAATCGGGTGCCTTAGAAGCTTGTGTACAAGCTCGTAATGAAGGACGTGATCTTGTCTCGTGAAGGTAATGAAGTGAT  
CCGTGAAGCTAGTAAATGGAGTCCCGAAGTACCC---GCTGCTTGTGAA---GTATGG---AAGGAGATCAAATTTGAA-  
--TTTGATACGGTTGATGTCTTG-----  
ATGGCCATCCGCTCATAACAGAACTTCTACTCCAGGTACACGTAATAGATCCGTA---TCAGGTTCAAATGAA-----  
AAAATGCAGTCTGATACACGGAAT-----  
AAATTGACCTCTGGACAGCACCATTGTGGGAAAGGTGCGTAATGACAGAGGAATTATTACCGCAAGACATAGAGGAGGAG  
TCACAAGCGCCTATATCGTTCGAATTGATTTTAGGCGAGATGAAAA---GACATATCTGAAAAATT-----  
--  
GTAACCATAGAATACGACCCCAATCGAAGTGCATACCTTTGTCTCGTACACTACGGGGATGGTGAAGAAGAAATATATTTT  
GCATCCCAGAGGAGTCATAATCGGAGATACTATTATTTCCGGC-----CCGAGAGCTCCTATATCAGTG-----  
-----GGAAATGCCCCACCTTTG-----  
ACCGATATGCCTTTAGGCACGGCTATACATAACATAGAAATAACACTTGGAAAGGGGTGGACAATTAGTTAGAGCAGCGGG  
TGCTGCTGCAGAACTGATCGCAAAAGAAGGTGATCGGCCACATTGAGATTACCATCTGGGGAGGTTTCGTTAATATCTG  
GGAACCTGCTCAGCAACAATCGGACAGGTAGGTAATGTTAATGCGAATAATAGAACTTTAAGTAAAGCTGGATCTAAACGT  
TGGCTGGGTAAACGTCTTAGGGTAAGAGGAGTAGTTATGAACCCCGTAGACCATCCTCATGGAGGTGGTGAAGGAAAGAAC  
CCCAATTGGTAGAAAAAACCCGCGACCCCTGGGGCTATACTGCGCTTGGAGGGAAGAGTCGGAAAAAGAATAGATATA  
GCGATGCTTCAATCCTTCGTGCGCGT---AAG-----  
ATGATTCGACCTCAAACCTATTTGAATGTGGCGGACAACAGCGGAGCCCGAAAACTAATGTGTATTTCGAGTTCTAGGAGT  
T---  
AGTAATCGCCAATACGCTCATATTGGGGACGTTATCATTGCTATAGTGAAAGAAGCAATACCAATATGCCCTCAAAGA  
ATCAGAAATAGTTAGAGCCGTAGTTGTACGCACCTGTAAAGAAGTGAACGTGACAATGGGATGGTAATACGATCCGATG  
ACAATGCAGCAGTTGTCATTGATCAGGAAGGA---  
AATCCGAAAGGAAGTTCGAGTTTTTGGTTTCAGTTGCTCGAGAATTGAGACAATTTAATTTCAAAAAATAGTTCCATTGGC  
TCCCGAAGTATTA---  
ATGCTTAGTAACCCCAAAAGAACAAAATTTTCGTAAACAACATAGGGGAAGAATGAAGGGAATATCTCATCGGGGCAATCG  
TATTTGTTTTGGTAGATTGCTCTTCAGGCACCTTGAACCCGCTTGGATTACATCTGAACAAATAGAAGCGGGACGACGAG  
CAATTACTCGCTATGCCCGTCTGGCGGAAAGATATGGGTACGTATATATCCCACAAACCTATTACAATGAGACCTGCA  
GAAACACGTATGGGTTCCGGGAAAGGATCTACCGAATACTGGGTATCTGTGCTCAGGCCAGGTGCAATACTTTATGAAAT  
AGGCGGAGTATCAGAGACTGTAGCTAGAGCAGCTATTCGAATAGCTGCATACAAAATGCCTATACATACTCAATTTGTTA  
CTGCTTCGCCTATA-----



ATGACCAGAGTTAGACGTGGATATATAGCTCGGAAACGTCGGAAAAATATTCTTGCATTTGCATCCGGTTACCGAGGGGC  
TCATTCGAAACTTTTTCGAACTGCTAACCAACAAAAAATTAGAGCTTTAGTTTTCCGCTCACCGTGATAGAGGTAAGCGAA  
AGAGAAGTCTTCGTTGTTTTGTGGATTACTCGTATCAATGCATCAGCCCGTGATAAT-----  
GGAGTCTCTTATAAC-----AGATTCATCCTATATTTATGCAGGAGACGTTTTGCTTCCGAATCGTAAAATACTTGCA--  
-----CAAATAGCTATATTAGATAGTAATTGCTTCTCCACGATCTTGAACAAGATTATCGAA-----  
-----  
-----  
-----  
-----  
-----  
-----  
-----  
-----  
-----  
-----  
-----

ATGGCAGTTCGGAAGAAACGTACTTCTAAATCCAGAAAACGAATTCGTAGAAATGTTTGGAAGGA---  
AAAGCGAATCTGACC GCAATAAAAGCTTTTTCTTTGGCTGAGTCT-----ATATCAACTGGTCAT-----  
TCAAAAAGTTTTTAT-----  
TGCACGACAAATAATGAGCCCTCCGGATCCTCTAAATCCACATTAATCAATGAATTGAATGATTTCG-----  
-----ATGGCCAAG---GGTGGAGATGTA---  
AGAGTAACAATTACCTCGGAATGTACTAGTTGTAAC-----CAGGATAGCGTTGAT-----  
AAAAAATCCCGGGTGTCTTAGATATACTACTAGAAAAAATCGCCGCAATACACCTATTTCGATCGGAATTGAAGAAATT  
TTGTCCCTATTGCTACAAGCATAACCATTACGGAGAGATAAAGAAA-----  
ATGAAAATCCGTGCTTCTGTTTCGTAAAATTCGTGAAAAGTGTGACTAATTCGTAGGCGGGGACGAGTTATGGTAATTTG  
TTCC---AATCCGAGACATAAGCAGAGACAAGGG-----ATGATT-----  
CGGGATGAAATATCAGTCTCCATT-----CAGACACTACGGTGGAAATGCATTGAATCC---AGAGTAAAC---  
GGTAAGCGTCTT---  
CATTATGGTCGCTTCGCTCTATCTCCGCTTCAGAAAAGGTCAAGCTAATACAATAGGCATCGCGATCGGAAGAGCTTTACT  
TGGGGAAGTAGAAGGAACATGTATCACACATGCGAAATTTGAGAATATGACGCATGAATATTCTGCGATAATGGGGATTG  
AAGAATCAGTACATGATATTTCAATCAATCTGAGAGGAATTGTACTTCAAAGTGATCCGTACGGAATTAGAGAA---  
GCATCTATCTATAGCGTTGGACCCAGAGATGTAACCGCTCAAGATATCATATTACCACCTTCTGTGAGAATAATTGATAC  
TACACAACATATAGCTAGCCTTAAAGAATCAATTACTTTCAGATATAAGATCACAGATCGGAAAAGATCGTGGATATCGTA  
TACAGAGTCCG---AATAATTCTCGGGATGGG---ATTTTTTCT-----  
ACAGATGCTGTATCTATGCCTGTTTCGAAACGCAAATTATAGTATTTCATTCTATGGGAACGGGAATGAG-----  
ATGCAAGAAATA

Glycine

GTGTAAGCAATTACGTTTTGTCTGGTGGAGATCATGTTTCACGCCGGTACCGTAGTAGGTAAGGAGGAA  
AGAGAAATCACTTTAGGTTTTGTTGATTTACTACGTGATGATTTTGTTGAAAAAGATCGAAGTCGCGGTATTTATTTCCAC  
TCAGGATTGGGTTTTCTTACCAGGTGTTTTGCCTGTAGCTTCGGGAGGTATTACGTTTTGGCATATGCCTGCTCTGACCG  
AGATCTTTGGGGATGATTCTGTACTCCAATTTGGCGGAGGAACTTTAGGACACCCTTGGGGAAATGCACCAGGTGCTGTA  
GCTAATCGAGTAGCTCTTGAAGCATGTGTGCAGGCTCGAAATGAAGGACGCGATCTTGTCTGTGAAGGTAATGAAATTAT  
CCGTGAGGCTAGCAAATGGAGTCCTGAATTAGCT---GCTGCTTGTGAA---GTATGG---AAGGAGATCAAATTTGAA--  
--TTCGAAGCAATGGATACTTTG-----  
ATGGCGATACATTTATACAAAACCTTACCCCAAGCACACGCAATGGAGCCGTA-----GACAGT-----  
CAAGTAAAATCCAATCCACGAAAT-----  
CATTTGATCTATGGACAGCATCGTTGTGGTAAAGGCCGTAATGCCAGAGGAATCATTACCGCAGGGCATAGAGGGGGAGG  
TCATAAGCGTCTATACCGTAAAATTGATTTTCGACGGAATGAAAAA---AACATATATGGTAGAATC-----  
---  
GTAACCATAGAATATGACCCTAATCGAAATGCATACATTTGTCTCATACTATGGGGATGGTGAGAAAAAATATATTTT  
ACACCCCAGAGGGGCTATAATTGGAGATACCATTGTTTCTGGT-----ACAGAAGTTCCTATAAAAATG-----  
-----GGAAATGCCCTACCTTTGAGT-----  
GATATGCCCTTAGGCACGGCAATACATAACATAGAAATCACACTCGGAAAGGGTGGACAATTAGCTAGAGCAGCAGGTGC  
TGTAGCGAAACTAATTGCAAAAGAGGGGAAATCGGCCACATTAATTAATACCTTCTGGGGAGGTCCGTTTTGATATCCAAA  
ACTGCTCGGCAACAGTTCGACAAGTGGGAAATGTTGGAGTAAACCAGAAAAATTTAGGTAGAGCCGGATCTAAATGTTGG



Gossypium

GTGTACTAGCTAAAGCTTTACGTATGTCTGGTGGAGATCATATTCACGCTGGTACAGTAGTAGGTAACTTGAAGGAGAA  
AGGGACATAACTTTGGGCTTTGTTGATTTACTACGTGATGATTTTTATTGAAAAAGATCGAAGCCGTGGTATTTATTTTAC  
TCAAGATTGGGTTTCTATGCCAGGTGTTCTGCCCGTAGCTTCGGGGGGTATTACGTTTTGGCATATGCCTGCTTTGACCG  
AGATCTTTGGAGATGATTCCTGACTACAATTCGGTGGAGGAACTTTAGGACACCCTTGGGGAAATGCACCGGGTGCCGTA  
GCTAATCGAGTAGCTTTAGAAGCATGTGTACAAGCTCGTAATGAGGGACGTGACCTTGGCCGCGAGGGTAATGAAATTAT  
CCGCGAGGCTAGCAAATGGAGTCTGAACTAGCT---GCTGCTTGTGAA---GTATGG---AAGGCGATCAAATTTGAA--  
--TTCGACGCAGTGGATAAATTAGATAAAGTGGAA-----  
ATGGCGATACATTTATACAAAACCTTCTACCCCGGGCACACGCAATGGAGCCGTA-----GACAGT-----  
CAAGTGAAATCCAATCCACGAAAT-----  
AATTTGATCTATGGACAGCATCGTTGTGGTAAAGGTCGTAATGCCAGAGGAATCATTACCGCAAGGCATAGAGGGGGAGG  
TCATAAGCGTCTATACCGTAAAATTGATTTTCGACGAAATGAAAA---GACATATATGGTAGAATC-----  
--  
GTAACCATAGAATACGACCCTAATCGAAATGCATACATTTGTCTCATACTATGGGGATGGTGAAGAAGAGATATATTTT  
ACATCCCAGAGGGGCTATAATTGGAGATACCATTGTTTCTGGT-----ACAGAAGTTCCTATAAAAATG-----  
-----GAAATGCCCTACCTTTG-----  
ACCGATATGCCCTTAGGCACGGCCATACATAACATAGAAATCACACTTGGAAAGGGGTGGACAATTAGCTAGAGCAGCGGG  
TGCTGTTGCGAAACTGATTGCAAAGGAGGGGAAATCGGCCACATTAATAATTACCTTCTGGGGAGGTCCGTTTGATATCCA  
AAAACCTGCTCAGCAACAGTCGGACAGGTGGGGAATGTTGGGGTGAACCAGAAAAGTTTGGGTAGAGCCGGATCTAAATGT  
TGGCTAGGTAAGCGTCTGTAGTAAGAGGAGTAGTTATGAACCCTGTAGACCATCCCCATGGGGGTGGTGAAGGGAGGGC  
TCCAATTGGTAGAAAAAACCCGCAACCCCTTGGGGTTATCCTGCACTTGAAGAAGAAGTAGAAAAAGGAATAAATATA  
GTGATAATTTGATTCTTCGTCGACGGAGTAAA-----  
ATGATTCAACCTCAGACCCATTTGAATGTAGCAGATAACAGCGGGGCCGAGAATTGATGTGTATTTCGAGTCATAGGAGC  
T---  
AGTAATCGCCGATATGCTCATATTTGGTGACGTTATTGTTGCTGTGATCAAGGAAGCAGTACCAAATACACCTCTAGAAAG  
ATCAGAAGTGATCAGAGCTGTAATTGTACGTACTCGTAAAGAACTCAAACGCGACAACGGGATGATAATACGATATGATG  
ACAATGCTGCCGTTGTCATTGATCAAGAAGGA---  
AATCCAAAAGGAACCTCGAATTTTTGGTGCATCGCCCGGAATTGAGACAGTTAAATTTCACTAAAATAGTTTCATTAGC  
TCCCAGGATATTA---ATGCTTAGT---  
CCCCAAAAGAAACCGATTTTCGTAACAACATAGAGGAAGAATGAAGGGGATATCTTATCGAGGTAATCGGATTTGTTTCGG  
TAGATATGCTCTTCAAGCACTTGAACCCGCTTGGATTACATCTAGACAAAATAGAAGCGGGGCGCCGCGCAATGACACGAA  
ATGTACGCCGTTGGTGGAAAAATATGGGTACGTATATTTCCAGACAAACCCGTTACGGTAAGACCTACAGAAACACGTATG  
GGTTCGGGAAAGGATCTCCCAGATTTGGGTAGCTGTGTTAAACCGGGCAGAATACTTTATGAAATGAGCGGAGTAGC  
CGAAAATATAGCCAGAAAGGCTATTTCAATAGCGGCGTCAAAAATGCCTATAAAAACCTCAATTCATTATTTTCAGGA----  
-----  
ATGACCAGAATTAACGGGGATATATAGCTCGTAGACGTGAAAAAAAATTAGTTTATTTGCATCAAGCTTTTCGGGGGGC  
TCATTCAGACTTACTCGAACTATTACTCAACAAAGAATAAGAGCTTTGGTTTTCGGCTCATCGGGATAGAGATAGGAAAA  
AAAGGGATTTTCGTCGTTTGTGGATCACTCGAATAAATGCAGTAATTCGTGGAGTG-----  
GGGGTATCCTATAGTTATAGTCGATTAATACACAATCTGTACAAGAAACAGTTGCTTCTGAATCGTAAAATACTTGCA--  
-----CAAATAGCTATCTCAAATAGGAATTGTCTTTATATGATTTCCAACGAGATTAGAAAA-----  
-----  
ATGATAAAGATAAAGAAACACAGGAGGAACCCATAT-----  
ACAACCTTCAGACGAAGTATACGCTTTAGGTCAACAT---  
ATATGTATGTCTGCTCACAAAGCACGAAGAATAATTGATCAGATTCGTGGACGTTCTACGAAGAAACACTTATGATACT  
AGAACTCATGCCTTATCGAGCATGTTATCCCATTTTAAAATTGGTTTTATTCTGCAGCAGCAAATGCTCGTCACAATAGGG  
GTTTCAATGAAGCGAGTTTAAATCATTAGTCAAGTCGCAGTAAATGAGGGAACACTCTGAAAAGACTAAAACCTCGAGCT  
CGAGGACGGAGTTATCTGATAAAAAGACCCACTTGTCAATAAATACTATTGCATTGAAAGATCTTGAATTTGAACCACTTGA  
CAGATATATGCTGCGCCCAAAACCAAAAAACACCGGATGGCTA-----  
-----  
GGATGGCTAAAAAAGGGATAAATGGATGGAATCAAATATGTAGTAGTTACAGACAAAAGTATTCGGTTATTGGTG---  
AAAAATCAATATACTTCTAATGTGCAATCAGGATCAACTAGGACAGAAATAAAGCATTGGGTGCAACTCTTCTTTGGTGT  
CAAGGTAATAGCTATGAATAGTCATCGACTC-----CCCGGAAAG-----  
GGTAGAAGAATGGACCTATTATGGGACATAACAATGCATTACAGGCGTATGATCATTACGCTTCAACCGGGTTATTCTAT  
TCCACCTCTTAGAACGAAAAGAACTTAA-----  
ATGGCAGTTCCAAAAAACGTACTTCTACATCAAAAAGCGTATTCGAAAAAATGTTTGGAAAAAG---  
AAAGGATATTGGGCGGCCTTGAAAGCTTTTTTATTAGCCAAATCT-----CTTTCTACGGGGAAT-----

TCAAAAAGTTTTTTTT-----GTACGCCAA-----ATAAAT-----  
TTGGAG-----  
ATGGCCAAG---AGTAAAGATGTC---CGAGTAACGATTATTTTGAATGTACCAGTTGTGTT-----  
CGAAACGGCGTTAAT-----  
AAGGAATCAACGGGTATTTCCAGGTATATTACTCAAAAAAATCGACACAATACGCCCAGTCGATTGGAATTGAAGAAATT  
CTGTCTTTATTGTTACAAACATACAATTCACGGGGAGATAAAGAAA-----  
ATGAAAATAAGGGCTTCCGTTTCGTAAAATTTGTGAAAAATGTGCGCTAATCCGTAGGAGGGGACGAATTATCGTAATTTG  
TTTT---AACCCGAGACATAAAACAAAGACAAGGA-----ATGGTT-----  
CGAGAGAAAGTAAAAGTCTCTACTTCGACTCGGACACGACAGTGGAAAGTGTGTTGAATCA---AGAACAGAT---  
AGTAAGCGCCTT---  
TATTATGGACGCTTTATTCTGTCTCCACTTATGAAAGGCCAAGCCGACACAATAGGCATTGCGATGCGAAGAGCTTTGCT  
TGGAGAACTAGAAGGAACATGCATTACACGTGCAAAATCTGAGAAAATACCCACGAATATTCTACCATAGTAGGTATTC  
AAGAATCAGTCCATGAAATTTTAATGAATTTGAAAGAAAATTGTATTGAGAGGGAATTTGTATGGAACCTCGTAAC---  
GCCTTTATTTGTGCCAAGGGTCCCGGATATGTAAGTCTCAAGACATCATCTTACCACCTTCTGTGGAAATCGTTGATAA  
TACACAGCATGTAGCCAGCCTAACCGAACCAATTGATTTGTGATTGGATTACAAATCGAGAGAAATAGAGGATACGGTA  
TAAAACGCCA---AGAACTTTCACGACGGA---AGTTATCCT-----  
ATAGATGCTGTATTTCATGCCTGTTTCGAAATGCGAATCATAGTATTTCATTGTTATGGGAATGATAATGAA-----  
AAACAGGAGATA  
Helianthus  
GTGTACTAGCTAAAGCGTTACGTATGTCCGGTGGAGATCACATTCATTCCGGTACCGTAGTAGGTAACTTGAAGGGGAA  
AGAGAAATCACTTTGGGCTTTGTTGATTTACTGCGTGATGATTTTATTGAAAAAGATAGAAGTCGCGGTATTTATTTCCAC  
CCAAGATTGGGTCTCTCTACCAGGTGTTCTGCCTGTAGCTTCGGGGGGTATTACGTTTTGGCATATGCCTGCTCTAACCG  
AGATCTTTGGGGATGATTCCGTAACAGTTCGGTGGAGGAACTTTAGGGCACCTTTGGGGTAATGCACCTGGTGCCGTA  
GCTAACCGAGTAGCTCTAGAAGCATGTGTACAAGCTCGTAATGAGGGACGCGATCTTGCTACTGAGGGTAATGAAATTAT  
CCGTGAGGCTACCAAATGGAGTCTGAACTAGCT---GCTGCTTGTGAA---GTATGG---AAGGAGATCAAATTTGAG-  
--  
TTCCAGGCAATGGATACTTTGGATACGGATAAAGGATAAAGATAAGAAGAGATAAATGGCGATAAATTTATACAAAACCTC  
TACCCCGAGCACACGCAATGGAACCGTA-----GACAGT-----CAAGTGAAATCCAATCCACGAAAT-----  
--  
AATTTGATCTATGGACAGCATCATTGTGGTAAAGGTGCGTAATGCCAGAGGAATCATTACCGCAGGGCATAGAGGGGGAGG  
TCATAAGCGTCTATACCGTAAAATAGATTTTCGACGGAATGAAAAA---GACATATATGGTAGAATC-----  
--  
GTAACCATAGAATACGACCCGAATCGAAATGCATACATTTGTCTCATACTATAGGGATGGTGAGAAGAGATATATTTT  
ACATCCCAGGGGGCTATAATTGGAGATACCATTGTTTCTGGT-----ACAGAAGTTCTATAAAAATG-----  
-----GGAAATGCCCTACCTTTG-----  
ACCGATATGCCCTTAGGCACGGCCATACATAACATAGAAATCACACTTGGAAAGGGTGGACAATTAGCTAGAGCAGCGGG  
TGCTGTAGCGAAACTGATTGCAAAAGAAGGGAAATCGGCCACATTAATAATTACCTTCTGGGGAGGTCCGTTTGATATCCA  
AAAATGCTCAGCAACAGTCGGACAAGTGGGGAATGTTGGGGTGAACCAGAAAAATTTGGGTAGGGCCGGATCTAAGCGT  
TGGCTAGGTAAGCGCCCTGTAGTAAGGGGAGTAGTTATGAACCCTGTAGACCATCCACATGGGGGTGGTGAAGGGAGGGC  
CCCAATTGGTAGAAAAAACCCACAACCCTTGGGGTTATCCTGCACTTGGAAAAAGAAGTAGAAAAAGGAATAAATATA  
GTGATAATTTGATTCTTCGTGCGCCGTAGTAAATAG-----  
ATGATTCAACCTCAGACCCATTTGAATGTAGCAGATAACAGCGGGGCTCGAGAATTGATGTGTATTCGAATCATAGGAGC  
T---  
AGCAATCGTCGATATGCTCATATTGGTGACGTTATTGTTGCTGTGATCAAAGACGCAGTTCCAAACATGCCTCTAGAAAG  
ATCAGAAGTGGTCAGAGCTGTAATTGTCCGTAATGTAAGAAGTAAACGTGACAACGGTATGATAATACGATATGATG  
ACAATGCTGCAGTTGTGATTGATCAAGAAGGA---  
AATCCAAAAGAACTCGCGTTTTTGGTGCGATTGCCCGAGAATTGAGACAGTTCAATTTTACTAAAATAGTTTTATTAGC  
TCCCGAGGTATTATAA-----  
CCCCAAAAGAACCAGATTCGGTAAACAACATAGAGGAAGAATGAAGGGAATATCTTATCGAGGTAATACTATTTGTTTTGG  
TAAATACGCTCTTCAGGCACCTGAAACCCGCTTGGATCACATCTAGACAAATAGAAGCAGGTGACGAGCAATGACACGAA  
ATGCACGTGCGGGTGGAAAAATATGGGTCCGTATATTTCCAGATAAAACAGTTACAGTAAGGCCCGCAGAAACACGTATG  
GGTTCAGGTAAGGGCTCTCCCGAATATTGGGTAGCTGTTGTTAAACCAGGTGCAATCCTTTTATGAAATGGGTGGAGTAAC  
AGAAAATATAGCCGAAGGGCTATTTCAATAGCAGCGTCCAAAATGCCTATACGAGCTCAATTCATCATTTCGGGATAA-  
-----  
ATGACCAGAATTAGACGGGGATATATCGCTCGGAGACGTAGAACAATAAATTCGTTTTATTTGCATCAAGCTTTTCGGGGGC  
TCATTCAGACTTACTCGAACTATTACTCAACAAAAAATAAGAGCTTTGGTTTTCGGCTCATCGGGATAGGGATAGGCAAA  
AAATCAATTTTCGTGCTTTGTGGATCACTCGAATAAATGCAGCAATTCGCGAAAG-----

GGGGTATGCTATAGTTATAGTAGATTTCATAAATGATCTGTACAAGAGACAATTGCTTCTTAATCGTAAAATACTTGCA--  
-----  
CAAATAGCTATATCAAATAGGAATTGTCTTTATATGATTTCCAATGAGATCATAAAAGAAGTAAGTTGGAAGGAATCCAC  
CGGTTAA-----ATGTTAAAT-----  
-----AAGAGAACAACAGAAGTATACGCTTTAGGTCAACAT---  
ATATCTATGTCTGCTCACAAAGCGCGAAGAGTAATTGATCAAATTCGTGGGCGTTCCCTACGAAGAAACACTTATGATATT  
AGAACTCATGCCTTATCGAGCATGTTATCCCATTTTTAAATTAGTTTATTCTGCAGCAGCAAATGCTAGTTCCAATATGG  
GTTTCGAATGAAGCAAATTTAGTGATTAGTAAAGCCGAAGTAAATAAAGGTACTATCATGAAGAGATTAACCTCGAGCT  
CGAGGGCGTAGTTTTGCGATACAAAAACCTACCTGCCATATAACTATTGTAATGAAAGATATATCCTTAGATGAA---  
TATATAGATAACCGAC-----TCTATTGCATGGTCA-----  
-----CAAATAAAAAAAGGATACAACCTATGTCGTATTATGATATG-----  
-----  
TATAGTAATGGGGGAACATGGGACAAAAATAAATGGATGGAATCAGGTATGCAGTATTTACAGACAAAAGTATTCGGTT  
ATTGGGG---  
AAAAATCAATATACTTCTAATGTGCAATCAGGATCAACTAGGACAGAAATAAAGCATTGGGTGCAACTCTTCTTTGGTGT  
CAAGGTAATCGCGATGAATAGTCATCGACTT-----CGGGGAAAG-----  
GCTAGAAGAATGGGACCCATTATGGGACAGACAATGCATTACAGACGTATGATCATTACGCTTCAACCGGGTTATTCTAT  
TCCACCTCTTAGAAAGAAAAGAACTTAA-----  
ATGGCAGTTCCAAAAAACGTACTTCGATATCAAAAAAGCGTATTCGTAAAAATATTTGGAAAAGG---  
AAAGGATATGGGGCGGCGTTAAAAGCTTTGTCAATTAGGGAAATCT-----CTTTCTACCGGGAGT-----  
TCAAAAAGTTTTTTT-----GTACGACAA-----ACA--  
----AAT---AAGTCCTAA-----  
ATGGCCAAG---GGTAAAGATGCG---CGAATACCGGTTCTTTTGGAAATGTACCGCTTGTGTT-----  
CGAAACGGGTGTTAAT-----  
AAGGAATCAACGGGCATTTCCAGATATATTACTCAAAGAACCGGCACAATACGCCTAATCGATTGGAGTTACTAAAATT  
CTGTCCATATTGTTACAAACATACGATTCACGGGGAGATAAAGAAATA-----  
ATGAAAATAAGAGCTTCTGTTTCGTAAAATTTGTGAAAAATGTGACTAATCCGTCGTCGGGGACGAATTATAGTAATTTG  
TTCC---AACCCAAAGCATAAAACAAAGACAAGGATAAATTATTATGGTT-----  
CGAGAGAAAATAACAGTATCTACT-----CGGACACTACAGTGAAGTGTGTTGAATCA---GCAGCAGAC---  
AGTAAGCGTCTT---  
TTGTATGGGCGCTTTATTCTGTCTCCGCTTATGAAAGGTCAAGCAGACACAATAGGCATTGCGATGCGAAGAGCTTTGCT  
TGGAGAAATCGAAGGAACATGTATCACACGCGCAAAATCTGAGAAAATCTCACACGAATATGCTACCATAATGGGTATTC  
AAGAATCAGTACATGAAATTTAATGAATTTGAAAGAAATCGTATTGAGAAGTAATCTCTATGGAACCTTGTGAG---  
GCGTCTATTTGTGTCAGGGGCCCTGGATATGTAAGTCTCAAGATATCATCTTACCGCCTTATGTAGAAATCGTCGATAA  
TACACAGCATATAGCTAGCTTGACGGAACCCATTGAGTTGGTTATTGGATTACAAATAGAGAAGAATCGTGGATATCTTA  
TAAAAGCGCCA---AATACCTTTCAAGATGGA---AGTTATCT-----  
ATAGATCCTGTATTTCATGCCTGTTTCGAAATGCGAATCATAGTATTTCATTCTTATGAAAATGGTAAC-----  
AAAGAGATA  
Illicium  
GTGTAAGCTAAAGCGTTGCGTATGTCTGGTGGAGATCATATTCACGCTGGTACTGTAGTAGGTAAGTAACTGGAAGGGGAA  
CGGGATGTCACTTTGGGTTTTGTTGATTTACTACGTGATGATTTTATTGAAAAGACCGAAGTCGCGGCATTTATTTCCAC  
TCAAGATTGGGTATCTATGCCAGGTGTTCTGCCCGTGGCTTCAGGGGGTATTACGTTTTGGCATATGCCTGCCTTGACCG  
AGATCTTTGGGGATGATTCCGTAACAGTTCGGTGGAGGAACTTTAGGACACCCTTGGGGAAATGCGCCTGGTGCAGTA  
GCTAATCGTGTGGCTTTAGAGGCGTGTGTACAAGCTCGTAATGAGGGACGTGATCTTGCTCGTGAAGGTAATGAAGTTAT  
CCGTGAAGCTAGCAAATGGAGCCCTGAAGTAGCT---GCTGCTTGTGAG---GTATGG---AGGGAGATCAAATTCGAA--  
--TTCGAAGCAATGGATGTCTTA-----  
ATGGCGATACATTTATACAAAACCTTACCCCGAGCACACGCAACGGAGCTGTA-----GACAGT-----  
CAAGCGAAATCCACTCCACAAAAGCAAAGAGTTTTGATCTATGGACAGCATCATTGTGGAAAGGTTCGTAATGCCAGAGG  
AGTCATTACCACAGGGCATAGAGGGGGAGGTATAAGCGTCTATACCGTAAAATCAATTTTCGACGGAATGAAAAA---  
GACATATCTGGTAGAATC-----  
GTAACCATAGAATACGACCCTAATCGAAATGCATACATTTGTCTCATACTATGGGGATGGTGAAGCGATATATTTT  
ACATCCCAGAGGGGCTAGAATTGGAGATACCATTGTTTCTGGT-----ACAGAAGTTTCTATATCAATG-----  
-----GGAAATGCCCTACCTTTG-----  
ACCGATATGTCCTTAGGCACGGCCATACATAACATAGAAATAACACTTGGAAAGGGTGGACAATTAGCTAGGGCAGCAGG  
TACTGTAGCGAAACTGATTGCAAAAGAGGGGAAATCGGCCACATTAAGATTACCATCTGGGGAGGTTCTGTTTGGTATCCA  
AAAAGTCTCAGCAACAGTCGGACAAGTAGGTAATGTTGGGGTGAACCAGAAAAGTTTGGGTAGAGCCGGATCTAAGTGT  
TGGCTAGGTAACGTCCTGTAGTAAGAGGAGTAGTTATGAATCCTGTAGACCATCCCCATGGAGGTGGTGAAGGGAGGGC



TCAAGATTGGGTCTCCCTACCAGGTGTTCTGCCCGTGGCTTCAGGGGGTATTACGTTTGGCATATGCCTGCTCTGACCG  
AGATCTTTGGGGATGATTCCGTACTACAGTTCGGTGGAGGAACCTTTAGGACACCCTTGGGGTAATGCGCCAGGTGCCGTA  
GCTAACCGAGTAGCTCTAGAAGCATGTGTAAGGCTCGTAATGAAGGACGTGACCTTGCTTCTGAGGGTAATGTAATTAT  
CCGTGAGGCTGCCAAATGGAGTCCGAACTATCT---GCTGCTTGTGAG---GTATGG---AAAGAGATCAGATTTGAC-  
---TTTAAAGCAGTGGATACTCTAGATCCAGAGAAGTAA-----  
ATGGCGATACATTTATACAAAACCTTCTACCCCGAGCACACGCAATGGAACCGTA-----GACAGT-----  
CAAGTGAAATCCAATCCACGAAAT-----  
AATTTGATCTATGGACAGCATCATTGTGGTAAAGGTGCGTAATGCCAGAGGCGTCATTACCACAAGGCATAGAGGGGGAGG  
TCATAAGCGTCTATACCGTCAAATCGATTTTCGACGGAATAAAAA---GACATATATGGTAGAATC-----  
--  
GTAACCATAGAATACGACCCTAATCGAAATGCATACATTTGTCTCATACTATGGGGATGGTGAAGAAGATATATTTT  
ACATCCCAGAGGGGCTCTAATTGGAGATACCATTGTTTCTGGT-----ACTAAAGTTCCTATAAAAAATG-----  
-----GGAAATGCCCTACCTTTG-----  
ACCCATATGCCCTTAGGCACGGCCATACATAACATAGAAATCACACTTGGAAAGGGTGGACAATTAGTTAGAGCAGCGGG  
TGCTGTAGCGAAACTGATTGCAAAAGAGGGGAAATCGGCCACATTAATAATTACCTTCTGGGGAGGTCCGTTTGATATCCC  
AAAACCTGCTCAGCAACAGTCGGACAAGTGGGGAATGTTGGGGCGAAGCATAAAAAGTTTGGGTAAAGCCGGATCTAAGCGT  
TGGCTAGGTAAGCGTCTGTAGTAAGAGGAGTAGTTATGAACCCTGTAGACCATCCCCATGGGGGGGGGAAGGGAGAGC  
CCCAATTGGTAGAAAAAAACCCACAACCCCTTGGGGTTATCCTGCACTTGGAAAGCAGAAGTAGAAAAAGGAATAAATATA  
GTGAGAATTTGATTCTTCGTCGCCGTAGTAAATAG-----  
ATGATTCAACCTCAGACCCATTTAAATGTAGCAGATAACAGCGGGGCTCGAAAATTGATGTGTATTGCAATCATAGGAGC  
T---  
AGCAATCGTCGATATGCTCATATTGGTGACGTTATTGTTGCTGTGATTAAAGAAGCAGTACCCCATATGTCCCTAGAAAA  
ATCAGAAGTAGTCAGAGCTGTAATTGTTTCGTACCTGTAAAGAACTTAAACGTGACTGCGGTATGATAATACGATATGATG  
ACAATGCTGCAATTGTGATTGATCAAAAAGGA---  
AATCCAAAAGGAAGTCGAGTTTTTGGTGCGATCCCCGAAGAATTGAGACAATTCGGTTTTACTAAAATACTTTCAATAGC  
TCCCGAGGTATTATAAATGCTTAGT---  
CCCCAAAAAATAGATTCCGTAACAACATAGAGGAAGAATGAAGGGAATATCTTCTCGAGGTAATTATATTTGTTTCGG  
TAGATATGCCCTTCAGGCACCTGAACCTGCTTGGATCACATCTAGACAAATCGAAGCAGGTGACGAGCAATGACACGAA  
ATGTACGCCGTGGTGGAAAAATCTGGGTCCGTATATTTCCAGACAAACCGGTTACAGCAAGATCTACCGAAGCACGTATG  
GGTGCGGGGAAGGGAGACCCTAAATATTGGGTAGCTGTTGTTAAACCGGGTCAATACTATATGAAATGGGCGGAGTAAC  
TAAAAATATAGCTAGAAGGGCTATTTCTATAGCAGCATCCAAAATGCCTATACGAACCTCAATTATTTCGGGATAA-  
-----  
ATGACCAGAATTAACCGCGGATCTATAGCTCGGAGACGTAGAACAAGGCTCATTCTTTTGCCTCCAAATTTTCGAGAGGC  
TCATGCAAGACTTACTCGAGCTATTACTCAACAGCAAATAAGAGCTTTATTTTTCGGCTGATCGGGATAGAGATAAGCAAA  
AGATAGATTTTTCGTCGTTTGTGGATCACTCGGATAAACGCCTAATTCGCGAAAAG-----  
GGAGTATTCATAATTATAGTAAATTCATAAATGATCTATACAAGAGCCAGTTGCTTCTTAATCGTAAAATACTTGCA--  
-----  
CAAATAGCTATATCAAATAGGAATTGTCTTTATATGATTGCCAACGAGATCATAAAAAAAGTAGGATTGCAATCCGCCGT  
AATAATTTAA-----ATGCGA-----  
-----AAGAAAAAACAGAAAGTATACGCTTTACGTCGACAT---  
ATATCCCTATCGGCTGACAAAGCAAGAAGAGTAATTGATCAAATTCGTGGACGCTCCTATGAAGAAACACTTATGATACT  
AGAACTCATGCCCTATAGAGCATGTTCTCCCATTTCAAATTTGGTTTTATTCTGCAGCAGCAAATGCTAATTCCAATATGG  
GTTCCAACAAAGCGAATTTAGTCATTAGTAACGCTGAAGTTAACGAGGGTACTACCAGAAAGAAATTCAAACCTCGAGCT  
CGAGGACATTGTTATCCGATAAAAAGACGTACCTGTATATAACTATTGGAGTGAAAGATATATCTTTAGATGATGAATA  
TGAA-----CAGATATATTCGTTA-----  
AAAAAACCTAGA---TGG-----AAAAATAAGTATACAACCTATGATATATCATGATATC-----  
-----  
GATAGTATTGGGAGAGTATGGGACAAAAAATAAATGGATGGAATCAAATATGCAGTATTTACAGAAAAAAGTATTCGGTT  
ATTGGGG---  
AAAAATCAATATACTTCTAATGTGCAATCAGGATCCACTAGGACAGAAATAAAGCATTGGGTGCAACTCTTCTTTGGTGT  
CAAGGTAATAGCTATGAATAGTCATCGACTT-----CCGGGAAAG-----  
GGTAGAAGAATGGGACCTATTATGGGACATACAATGCATTACAGACGTATGATCATTACGCTTCAACCCGGTTATTCTAT  
TCCACCTCTTAGAAAGAAAAGAACTTAA-----  
ATGGCAGTTCCAAAAAACGTACTTCTGCATCAAAAAAGCGTATTCGTAAAAATAGTTGGAAAGGG---  
AAGGGATATGGGACAGCGTTAAAAGCATTTTCTTAGGGAAATCT-----CTTTCTACCGGGAAT-----  
TCTAAAAGTTTTTTTT-----GTGCCAAA-----AAT--  
-TCTCTC---

AAAGTTTTCAAAGAATAATAAAAAATTGGAATAATCTGAATCGACTTGGGTCAAAAAATTGAATGGCCAAG---  
GGGAAAGATGCGCCGCGAGTAAGGGTTATTTTGAATGTACCGGTTGTGTC-----CGAAACGCGGTA-----  
-----

TCAAGGGGCGTTTTCCAGATATATTACTCAAAGAACCAGGCACAATACGTCTAAACAATTAGAATTGAGAAAATTCTGTCC  
CTATTGTCACAAACATATGATTCATGGGGAAATCAAATAAAATAAAATGAAAAAAGAGCTTCTGTTTCGTAATAATTT  
GTCAAAAATGTCGCCTAACCCGGAGGCGGGGACGCATTAGAGTAATTTGTTCC---  
AACCCGAGACATAAAAAAGACAAGGATAA-----ATGGTT-----CGAGAGAAAGTAAGAGTATCTACT-----  
-CGGACACTACAGTGGAAGTGTGTTGAATCA--AGAGAAGAC---AGTAAACGTCTT---  
TATTATGGACGCTTTATTCTGTCTCCACTTAGAAAAGGTCAAGCCGATACAATAGCCATTGGGATACGAAGAGCTTTACT  
TGGAGAAAATAGAAGGAACATGTATCACACGTGTAATACTAAGAACGTCCCGCATGAATATTCTACCATAGCGGGTATTC  
AAGAATCGGTCCATGAAATTTAATGAATTTCAAAGAAATGTATTGAGAAGTAATCTATATGGAACCTTGTGAC---  
GCGTCTATTTGTGTTAGAGGTCCAGGGTATGTAACCTGCTCAAGATATCATCTTACCACCTTATGTAGAAAATCGTTGATAA  
TACACAACATATAGCTAGCTTGACAGAACCAATTGATTTGTGATTGGATTACAAATCGAGAGAAAATCGCGGATATCTTA  
TGAAAATGCCA---CATAACTCTCAAGATGGA---AGTTATCCT-----  
ATAGATGCTGTATTTCATGCCTGTTTCGAAATGCAATCATAGTATTCATTCTTATGGGAGTGGGAATGAA-----  
AAACACGAGATA

Lactuca

GTGTACTAGCTAAAGCGTTACGTATGTCTGGTGGAGATCATATTCATTCCGGTACCGTAGTAGGTAACTTGAAGGGGAA  
AGAGAAATCACTTTGGGCTTTGTTGATTTACTGCGTGATGATTTTATTGAAAAGATAGAAGTCGCGGTATTTATTTTAC  
CCAAGATTGGGTCTCTTACCAGGTGTTCTGCCTGTAGCTTCGGGCGGTATTCACGTTTGGCATATGCCTGCTCTGACCG  
AGATCTTTGGAGATGATTCCGTACTACAGTTCGGTGGAGGAACCTTTAGGGCACCTTGGGGAAATGCACCCGGTGCCGTA  
GCTAATCGAGTAGCTCTAGAAGCATGTGTACAGGCTCGTAATGAGGGACGCGATCTTGCTACTGAGGGTAATGAAATTAT  
CCGTGAGGCTACCAAATGGAGTCCCTGAACTAGCT---GCTGCTTGTGAA---GTATGG---AAGGAGATTAATTTGAG-  
--TTTCAGGCAATGGATACTTTGGATCAATAA-----

ATGGCGATACATTTATACAAAACCTTCTACCCCGAGCACACGCAATGGAGCCGTA-----GACAGT-----  
AAAGTGAAATCCAATCCACGAAAT-----

AATTTGATCTATGGACAGCATCATTGTGGTAAAGGTCGTAATGCCAGAGGAATCATTACCGCAGGGCATAGAGGGGGAGG  
TCATAAGCGTCTATACCGTAAAATAGATTTTCGACGGAATGAAAA---GACATATATGGTAGAATC-----  
---

GTAACCATAGAATACGACCCGAATCGAAATGCATACATTTGTCTCATACTATAGGGATGGTGAAGAAGATATATTTT  
ACATCCCAGGGGGGCTATAATTGGAGATACCATTGTTTCTGGT-----ACAGAAGTTCCTATAAAAATG-----  
-----GGAAATGCCCTACCTTTG-----

ACCGATATGCCCTTAGGCACGGCCATACATAACATAGAAATCACACTTGGAAAGGGTGGACAATTAGCTAGAGCAGCGGG  
TGCTGTAGCGAAACTGATTGCAAAAAGAAGGGAAATCGGCCACATTAATAATTACCTTCTGGGGAGGTCCGTTTGATATCCA  
AAAATGCTCAGCAACAGTCGGACAAGTGGGGAATGTTGGGGTGAACCAGAAAAGTTGGGTAGAGCCGGATCTAAGCGT  
TGGCTAGGTAAGCGCCCTGTAGTAAGAGGAGTAGTTATGAACCCTGTAGACCATCCACATGGGGGTGGTGAAGGGAGGGC  
CCCAATTGGTAGAAAACAACCCACAACCCCTTGGGGTTATCCTGCACTTGGAAAAGAAGTAGAAAAGGAATAAATATA  
GTGATAATTTGATTCTTCGTGCGCCGTAGTAAATAG-----

ATGATTCAACCTCAGACCCATTTGAATGTAGCAGATAACAGCGGGGCTCGAGAATTGATGTGTATTGCAATCATAGGAGC  
T---

AGCAATCGCCGATATGCTCATATTTGGTGACGTTATTGTTGCTGTGATCAAAGACGCAGTTCCAAACATGCCTCTAGAAAG  
ATCAGAAGTGGTCAGAGCTGTAATTGTCCGTACTTGTAAAGAACTTAAACGTGACAACGGTATGATAATACGATATGATG  
ACAATGCCGCGATTGTGATTGATCAAGAAGGA---

AATCCAAAAGGAACGCGAGTTTTTGGTGCGATTGCCCGAGAATTGAGACAGTTCAATTTTACTAAAATAGTTTCATTAGC  
CCCTGAGGTATTATAGATGCTTAGT---

CCAAAAGAACCAGATTCCGTAACAACATAGAGGAAGAATGAAGGGAATATCTTATCGAGGTAATGCTATTTGTTTTGG  
TAAATACGCTCTTTCAGGCACCTTGAACCCGCTTGGATCACCTCTAGACAAATAGAAGCAGGTGACGAGCAATGACACGAA  
ATGCACGTGCGGGTGGAAAAATATGGGTCCGTATATTTCCAGATAAACAGTTACAGTAAGACCCGAGAAAACACGTATG  
GGTTCAGGTAAAGGCTCTCCCGAATATTGGGTAGCTGTTGTTAAACCAGGTGCAATACTTTATGAAATGGGTGGAGTAAC  
AGAAAATATAGCCAGAAGGGCTATTTCAATAGCAGCGTCCAAAATGCCTATACGAGCTCAATTCATCATTTCGGGATAA-

ATGACCAGAATTAGACGGGGATATATCGCTCGGAGACGTAGAACAATAAATTCGTTTATTTGCATCAAGCTTTTCGGGGGGC  
TCATTCAAGACTTACTCGAACTATTACTCAACAAAAATAAGAGCTTTGGTTTTCGGCTCATCGGGATAGGGATAAGCAAA  
AAATCAATTTTCGTGCTTTGTGGATCACTCGAATAAATGCAGCAATTCGTGAAAGG-----  
GGGGTATGCTATAGTTATAGTAGATTAATAAACGGTCTGTACAAGAGACAGTTGCTTCTTAATCGTAAAATACTTGCA--  
-----

CAAATAGCTATATCAAATAGGAATTGTCTTTATATGATTTCCAATGAGATCATAAAAAGAAGTAGGTTGGAAGGAATCCAC



CGGTTAA-----ATGTTAAAT-----  
-----AAGAGAACAACAGAAGTATACGCTTTAGGTCAACAT---  
ATATCTATGTCTGCTCACAAAGCGCGAAGGGTAATTGATCAAATTCGTGGGCGTTCCTACGAAGAAACACTTATGATATT  
AGAAGTTCATGCCTTATCGAGCATGTTATCCAATTTTTAAATTAGTTTTATTCTGCAGCAGCAAATGCTAGTTTCAATATGG  
GTTTCGAATGAAGTAAATTTAGTCATTAGTAAAGCTGAAGTCAATGAAGGTAATTTGTGAAGAGATTAACCTCGCGCT  
CGAGGGCGTAGTTTTGCGATACAAAACCTACCTGCCATATAACTATTGTAATGAAAGATATATCCTTAGATGAATATAT  
AGATACCGAC-----TCTATTACATGGTCA-----  
CAAAAACCTAAA---TCG-----AAAAAAAAGCATACTACTATGTTCGTATTATGATATG-----  
-----  
TATAGTAATGGGGAACATGGGACAAAAATAAATGGATGGAATCAGGTATGCAGTATTTACAGACAAAAGTATTCAGTT  
ATTGGGG---  
AAAAATCAATATACTTCTAATGTGCAATCAGGATCAACTAGGACAGAAATAAAGCATTGGGTGCAACTCTTCTTTGGTGT  
CAAGGTAATCGCGATGAATAGTCATCGACTT-----CGGGGAAAAG-----  
GCTAGAAGAATGGGACCCATTATGGGACAGACAATGCATTACAGACGTATGATCATTACGCTTCAACCGGGTTATTCTAT  
TCCACCTCTTAGAAAGAAAAGAACTTAA-----  
ATGGCAGTTCCAAAAAACGTAATCTTATATCAAAAAAGCGTATTCGTAAAAATATTTGGAAAAGG---  
AAAGGATATTGGGCGGCGTTAAAAGCTTTGTTCATTAGGGAAATCT-----CTTTCTACTGGGAAT-----  
TCCAAAAGTTTTTTT-----GTGCGACAA-----ACA---  
----AAT---AAGTCCTAA-----  
ATGGCCAAG---GGTAAAGATGTG---CGAATACCGGTTCTTTTGGAAATGTACCGCTTGTGTT-----  
CGAAACGGTGTTAATGTTAAT-----  
AAGGCATCAACGGGCATTTCCAGATATATTACTCAAAAGAACCAGGACAAATACGCCTAATCGATTGGAGTTGCGAAAATT  
CTGTCCATATTGTTACAAACATACGATTCACGGGGAGGTAAAGAAATAG-----  
ATGAAAATAAGAGCTTCTGTTTCGTAAAATTTGTGAAAAATGTGCGATTAATCCGTCGTCGGGGACGAATTAGAGTAATTTG  
TTCC---AACCCAAGACATAAACAAAGACAAGGATAA-----ATGGTT-----  
CGAGAGAAAATAACAGTATCTACT-----CGGACACTACAGTGGAAAGTGTGTTGAATCA---GCAGCAGAC---  
AGTAAGCGTCTT---  
CTTTATGGGCGCTTTATTCTGTCTCCGCTTATGAAAGGTCAAGCAGACACAATAGGCATTGCTATGCGAAGAGCTTTGCT  
TGGAGAAATCGAAGGAACATGTATCACACGCGCAAAATCTGAGAAAATATCACACGAATATTCTACCATAATGGGTATTC  
AAGAATCAGTACATGAAATTTAATGAATTTAAAAGAAATCGTATTGAGAAGTAATCTCTATGGAACCTTGTGAG---  
GCGTCTATTTGTGTCAGGGGCCCCGGATATGTAAGTCTCAAGATATCATCTTACCGCCTTATGTAGAAATCCTCGATAA  
TACACAGCATATAGCTAGCTTGACGGAACCCATTGAGTTGGTTATTGGATTACAGATAGAGAAGAATCGCGGATATCTTA  
TAAAAGCGCCA---AATACCTTTCAAGATGGA---AGTTATCCT-----  
ATAGATCCTGTATTTCATGCCTGTTTCGAAATGCGAATCATAGTATTTCATTCTTATGAAAATGGTAAC-----  
AAAGAGATA  
Liriodendron  
GTGTACTAGCTAAAGCATTACGTATGTCTGGTGGAGATCATATTCCTCTGGTACCGTAGTAGGTAACCTGGAAGGGGAA  
CGGGACATCACTTTGGGTTTTGTTGATTTACTACGTGATGATTTTTATTGAAAAGACCGAAGCCGCGGTATTTATTTCTC  
TCAAGATTGGGTCTCTTTGCCAGGTGTTCTGCCCGTGGCTTCAGGCGGTATTCACGTTTGGCATATGCCTGCCCTGACCG  
AGATCTTTGGGGATGATTCCGTAACAGTTCGGTGGAGGAACTTTAGGACACCCTTGGGGAAATGCACCTGGTGCAGTA  
GCTAATCGGGTGGCGTTAGAAGCGTGTGTACAAGCTCGTAATGAGGGACGTGATCTTGCTAGTCAAGGTAATGAAATTAT  
CCGTGAAGCTAGCAAATGGAGCCCTGAACTAGCT---GCTGCTTGTGAG---GTATGG---  
AAGGAGATCAAATTCGACAGTTTCAAAGCAATGGATACCTTG-----  
GCGATACATTTATACAAAACCTTACCCCGAGCACACGCAATGGAGCCGTA-----GACAGT-----  
CAAGTGAAATCCAATCCACGAAAT-----  
AATTTGATCCATGGACAGCATCATTGTGGTAAAGGTGCGTAATGCCAGAGGAATCATTACCGCAGGGCATAGGGGGGAGG  
TCATAAGCGTCTATACCGTAAAATCGATTTTCGACGGAATGAAAA---GACACATCTGGTAGAATC-----  
---  
GTAACCATAGAATACGACCCTAATCGAAATGCATACATTTGTCTCATACTATGGGGATGGTGAAGAGATATATTTT  
ACACCCCAGAGGGGCTATAATTGGAGATACCATTGTTTCTGGT-----ACAGAAGTTTCTATATCAATG-----  
-----GGAAATGCCCTACCTTTGAGT---  
ACCGATATGCCCTTAGGCACGGCCATACATAACATAGAAATCACACTTGGAAAGGGTGGACAATTAGCTAGAGCAGCAGG  
TGCTGTAGCGAAACTGATTGCAAAAGAGGGTAAATCGGCCACATTAAGATTACCATCTGGGGAGGTCCGTTTGTATATCCA  
AAAAGTCTCAGCAACAGTCGGACAAGTGGGTAATGTTGGGGTGAACCAGAAAAGTTTGGGTAGAGCCGGATCTAAGTGT  
TGGCTAGGTAAGCGTCTGTAGTAAGAGGAGTAGTTATGAACCCTGTAGACCATCCCCATGGGGGTGGTGAAGGGAGGGC  
CCCATTGGTAGAAAAAACCCACAACCCCTTGGGGTTATCCTGCGCTTGAAGAAGAAGTAGGAAAAGGAATAAATATA  
GTGATAGTTTATTCTTCGTCGCCGT-----

ATGATTCAACCTCAGACCCATTTGAATGTAGCGGACAACAGCGGGGCTCGAGAATTGATGTGTATTCGAATCATAGGAGC  
T---  
AGTAATCACCGATATGCTCATATTGGTGACGTTATTGTTGCTGTAATCAAAGAAGCAGTGCCCAATATGCCTCTCGAAAG  
ATCAGAAGTGATCAGAGCTGTAATTGTACGTACATGTAAAGAACTCAGACGTGACAACGGTATGATAATACGATATGATG  
ACAATGCAGCAGTTGTCATTGATCAAGAAGGA---  
AATCCAAAAGGAACTCGGGTTTTTGGAGCGATCGCTCGAGAATTGAGACAGTTGAATTTCACTAAAATAGTCTCATTAGC  
TCCTGAGGTATTA-----  
AACCCCAAAGAACCAGATTCCGTAAACAACATAGAGGAAGAATGAAGGGAATATCTTATCGAGGCAATCATATTTGTTT  
CGGTAGATATGCTCTTCAGGCACTTGAACCCGCTTGGATCACATCTAGACAAATAGAAGCAGGGCGACGAGCAATGACAC  
GATATGCGCGCCGTGGTGGAAAAATATGGGTACGTATATTTCCCGACAAACCGTTACAGTAAGACCTACGGAAACACGT  
ATGGGTTTCGGGAAAGGGATCTCCCGAATATTGGGTATCTGTTGTTAAGCCAGGTCAATACTTTATGAAATGGGCGGAGT  
ATCGGAAACTGTAGCCAGAGCAGCTATTAATAAGTCTGCGTGCAAAATGCCTATACGAACGCAATTCATTATTTTCAGGA-  
-----  
ATGACCAGAGTTAGACGAGGATATATAGCTCGGAGACGTGCAACAAAAATTCGTTTATTTGCATCAACCTTTTCGAGGGGC  
TCATTCAAGACTTACTCGAACTACTACTCAACAGAAAATGAGAGCTTTGGTGTCCACTCATCGGGATAGAGGCAGGCGAA  
AGAGAGATTTTCGTCATTTGTGGATCACTCGGATAAATGCAGTAACCTCGTGAGAAT-----  
AGGGTATCCTATAGTTATAGTCGATTAATACATGATCTGTACAAGAGGCAGTTGCTTCTTAATCGTAAAATACCTGCA--  
-----CAAATAGCTATATCAAATAGGAATTGTCTTTACACGATTTCCAATGAAATCATCAA-----  
-----  
CAAAGATGGAGACGAAGAGG-----  
ATCTTAAGTACACAAGTAAAAGCTTTAGCTCAAAAT---  
GTATGTATGTCTCCTCACAAAGCACGAAGAGTCATTGATCAGATTCGTGGGCGTTCCCTATGAGGAAACACTTATGCTACT  
GGAACCTATGCCTTATCGAGCATCTTATCCCATTTTTAAATTGGTTTTATTCTGCAGCAGCAAACGCTAGTCACAATAAAA  
GTTTCAACGAAGCTGATTCAGTCATTAGTAAAGCCGAAGTCAATGGGGGTACTATCGTGAAAAGGTTAAAACCTCGGGCT  
CGAGGACGTAGTTATCCGATAAAAAGACCCACCTGTATATAACTATTGTAGTGAGGGATAGCTCTAAAAAGAAAACGGA  
GCAGGATATATATTTAGAA-----ACAAA-----  
-----  
ATGGATGGAATCAAATATGAAGTCTTTACAGAAAAAGTATTCGGTTATTGGAG---  
AACAAATCAATATACTTCTAATGTGCAATCAGGATCAACTAGGACAGAAATAAAGCATTGGGTGCAACTCTTCTTTGGTGT  
CAAGGTAATAGCTATGAATAGTCATCGACTC-----CCGGGAAAAG-----  
GGTATAAGAATGGGACCTATTATGGGACATACAATGCATTACAGACGTATGATCATTACGCTTCAACCGGGTTATTCTAT  
TCTAACTCTTATACAGAAAAGAACTTAA-----  
ATGGCGGTTCCAAAGAAACGTACTTCTATGTCAAAAAAGCGTATTCGTAGAAATATTTGGAAGAAA---  
AAGGGATATTGGGCAGCGGTAAAAGCTTTATCTTTAGCTAAATCT-----ATTTCTACCGGACAT-----  
TCAAAAAGTTTTTTT-----GTGCGACAA-----ACA--  
-AGTAAT---AAAGCCTTGGAA-----  
ATGGCCAAG---GGTAAAGATGTC---AGAGGAATAGTTATTTTGCAATGTACCAGTTGTGTC-----  
CGAAATGATTTCAAT-----  
AAAGAATCGCGGGGCACTTCCAGATATATTACTCAAAGAATCGACACAATACACCTAGTCGATTGGAATTGAGAAAATT  
CTGTCTTATTGTTACAAGCATACGATTCATGGGGAGATAAAGAAA-----  
ATGAAAATAAGGGCCTCTGTTTCGTAAAATTTGTGAAAAATGTGCGACTGATCCGTAGGCGGGGACGAATTATAGTAATTTG  
TTTC---AATCCGAGACATAAACAGAGACAGGGG-----ATGGTT-----  
CGAGAGGAAGTAGCAGTATCCACT-----CGGACACTACAGTGGAAGTGTGTTGAATCA---AGAACAGAC---  
AGTAAGCGTCTT---  
TATTATGGCCGTTTTCATTTTTGGCCCCGCTTATGAAAGGCCAAGCAGATACGATAGGTATCGCGATGCGAAGGGCTTTACT  
TGGAGAAAATAGAAGGAACATGTATCACACGTGTAATACTGAAAAGGTACCAAATGAATATTATACGATAGTCGGTATTG  
AAGAATCAGTACATGAAATTTAATGAATTTGAAAGAAATTTGATTGAGAAGCCATCTGTATGGAACCTCGTGAC---  
GCATCCATTTGCGTCAGGGGCTTAGATATGTAAGTCTCAAGATATCATCCACCGCCTTCTGTGGAAATAGTTGATAC  
TACACAGCATATAGCTAGCCTGACGGAACCAATTGATTTGTGATTGAATTACAAATCGAGAGGGATCGTGGATATCGTA  
TGAAAACACCA---AATAATTATCAAGATGGA---AGTTATCCT-----  
ATAGATGCTGTATCCATGCCTGTTTCGAAATGCGAATCATAGTATTCTTATGGGAATCGGAATGAA-----  
AAACAAGAGATA  
Lotus  
GTGTACTAGCTAAAGCGTTACGTATGTCTGGTGGAGATCATATTCACGCCGGTACTGTAGTAGGTAAACTTGAAGGGGAA  
AGGGAAATCACTTTAGGTTTTGTTGATTTACTACGTGATGATTTTGTGAAAAGATCGAAGTCGCGGTATTTATTTTAC  
TCAGGATTGGGTTTTCTTACCAGGTGTTCTACCTGTTGCTTCGGGAGGTATTACGTTTTGGCATATGCCTGCTCTGACCG

AAATCTTTGGAGATGATTCTGTACTCCAATTCGGTGGAGGAACTTTAGGACACCCTTGGGGAAATGCACCTGGTGCTGTT  
GCTAATCGAGTAGCTCTTGAAGCGTGTGTACAAGCTCGAAACGAGGGACGTGATCTTGCTCGTGAGGGTAATGAAATTAT  
CCGTGAGGCGTCCAAATGGAGTCTGAATTAGCT---GCTGCTTGTGAA---ATATGG---AAGGAGATCAAATTTGAA-  
--TTCCAAGCAATGGATACTTTG-----  
ATGGCGATACATTTATACAAAACCTTCTACCCCGAGCACACGCAATCGAGCCGTA-----GACAGT-----  
CAAGTGAAATCCAATCCACGAAAT-----  
CGTTTGTATCTATGGACTACATTGTTGTAGTAAAGGCCGTAATGCCAGAGGAATCATTACCGCAGGGCATAGGGGGGGGG  
TCATAAGCGTCTATACCGTAAAATCGATTTTCGACGGAATGAAAA---AACATATATGGGAAAATC-----  
--  
GTAACCATAGAATACGACCCTAATCGAAATGCATACATTTGTCTCATACTATGGGGATGGTGAGAAAAGATATATTTT  
ACACCCAGAGGGGCTATAATTGGAGATACCATTGTTTCTGGT-----ACAGAAGTTCCTATAAAAATG-----  
-----GAAATGCCCTACCTTTG-----  
ACCGATATGCCCTTAGGCACGGCCATACATAACATAGAAATCACATTCGGAAAGGGTGGAAAATTAGCTAGAGCAGCAGG  
TGCTGTAGCGAAACTGATTGCAAAAGAGGGGAAATCGGCAACATTAATAATTACCTTCTGGGGAGGTCCGTTTGTATATCCA  
AAAAGTCTCAGCAACAGTCGGACAAGTAGGAAATGTTGGGGTAAACCAGAAAAGTTTGGGCAGGGCCGGATCGAAATGT  
TGGCTAGGTAAGCGTCTGTAGTAAGAGGAGTGGTTATGAACCCTGTAGACCACCCCATGGGGGGGGTGAAGGGAGGGC  
CCCCATTGGTAGAAAAAACCCGTAACCTTGGGGTTATCCTGCACTTGAAGAAGAAGTAGAAAAAGGAAGAAATATA  
GTGATAATTTGATTCTTCGTCGCCGTAATAA-----  
ATGATTCAACCTCAAACCCATTTAAATGTAGCCGATAATAGCGGAGCCCGCAAATTTGATGTGTATTGCAATCATAGGAGC  
T---  
AGTAATCGACGATACGCTTATATTGGTGACATTGTTGTTGCTGTAATCAAAGAAGCAGTACCGAATACACCCTTAGAAAG  
ATCAGAAGTGATCAGAGCTGTAATTGTACGTACTTGTAAAGAAGTCAAACGTAGCAATGGTATAATAATACAGTATGATG  
ATAATGCTGCAGTTGTCATTGATCAAGAAGGA---  
AATCCAAAAGGAACTCGAATTTTTTGCGCAATCGCCCGGGAATTGAGACAGTTC AATTTCACTAAAATAGTTTCATTAGC  
GCCTGAGATATTA---ATGCTTAGT---  
CCAAAAAGAACCAGATTCGGTAAACAACATAGAGGAAGAATGAAAGGAATATCCCATCGAGGTAATCAAATTTGCTTTGG  
AAGATATGCTCTTCAGGCACCTTGAACCAGCTTGGATAACATCTAGACAAAATAGAAGCGGGGCGGAGGGCAATGTCACGAA  
ATGTGCGCCGAGGTGGACAAATATGGGTACGCATATTTCCGGATAAACCTGTTACAGTAAGACCTACCGAAACGCGTATG  
GGTTCGGGAAAGGGATCTCCCGAATATTGGGTAGCCGTAGTTAAACCCGGAAAAATAGTTTTATGAAATGGGCAGGATCGC  
AGAAAAATATAGCCAGAAAAGCTATTTCAATAGCAGCATCCAAAATGCCTATACGAACTCAATTCATTATTTTCAGGA----  
-----  
ATGACCAGAATTAACGAGGATATATAGCGCGAAAACGGAGGACAAAAATTCGTTTATTTACATCAAGCTTTTCGCGGAGC  
TCATTCAAGACTTACTCGAACTATTTTCGCAACAAAAAATAAAAGCTTTGGTTTTCGGCTCATCGGGACAGAAATCGGAAAA  
AAAGAGAATTTTCGAGGTTTTATGGATCAGTCAATAAATGCAGGAATTGGTGATAACGATAAGAAAAA-----  
AATATATACTATAGTTATAGTAATTTTATGTATAATCTGTACAAGAAGCAATTGCTTCTTAATCGTAAAATAGTTGCA--  
-----CAAATAGCTATATTTCAAAGGGAATTGTCTTTTTTATGATTGCCAACGAGATCATAACA-----  
-----  
-----ATGAATGGAATCAAATATGCAGTATTTACAGACAAAAGTATTCGGTTATTGGGG---  
AAAAATCAATATACTTCTAATGTGCAATCGGGATCAACTAGGACAGAAAATAAAGCATTGGGTGCAACTCTTCTTTGGTGT  
CAAGGTAAAAGCTATGAATAGTCATCGACTC-----CCGGCAAAG-----  
GGTAGAAAAGTGCAGCTTATTATGGGACATACAATGCATTACAGACGTATGATCATTACGCTTCAACCGGGTTATTCTAT  
TCCACCTCTTAGAAAAGAAAAGAACTTAA-----  
ATGGCAGTTCCAA AAAAGCGGACTTCTATATCAAAAAA ACTCATTTCGTAAGAATTTTTGGAAAAAG---  
AGGGGATATTGGACAGCATTGAAAGCGTTTTTCATTAGCGCAATCC-----ATTTTTACGGGAAAT-----  
TCTAAAAGTTTTTTTT-----TGTAACAAA-----  
-----  
ATGGCCAAG---GGTAAAGATATC---CGAATAATTGTTATTTTGGAAATGTACCGTTGTGAT-----  
CAAAAGAGTGTAAAT-----  
AAGGAATCCAGCGGTATTTCCAGATATATTACTCAAAGAATCGACACAATACGCCAGTCGATTAGAATTAATAAAATT

CTGTCCTTGTTCGCAAACATATGATTCACGCAGAGATAAAGAAA-----  
ATGAAAATAGGAGCGTCTGTTTCGTAAGATTTGTGAAAAATGTCGATTGATCCGAAGGCGAGGTCGGATTATAGTAATTTG  
TTCC---AACCCAAGACATAAAACAAAGACAGGGA-----ATGGTT-----  
CGAGAGAAAAGTAAGAGTATCTACT-----CGGACACTACAGTGGAAGTGTGTTGAATCA---AGAATAGAC---  
AGTAAGCGACTT---  
TATTATGGACGCTTTATTCTGTCTCCACTTATGAAAGGCCAAGCCGATACAATAGGCATTGCAATGCGAAGAATTTTGTCT  
CGGAGAAATGGAGGGAACATGTATCACACGTGCAAAATCTGAGAAAATATCACATGAATATTCTACCATAGTAGGTATTC  
AAGAACCAGTACATGAGATTTTAATGAATTTGAAAGAAATTTGTATTGAAAAGTAATCTGTATGGAATTCGCGAT---  
GCGTCTATTTGTTTCAAAGGTCCCGGATATGTAACCTGCTCAAAACATTATTTTACCACCTTCGGTGGTAATCGTTGATAA  
TACACAACATATAGCTAATGTAACAGAACCAATTCAGTTGTGTATTGGATTACAAATTGAGAGGGGATCGTGGATATCGTA  
TAAACACACTA---AAAAATTTTCAAGATGGA---AGTTATAAT-----  
ATAGATGCTATATTCATGCCTGTTTCGAAATGCAATCATAGTATTCTTACGTGAATGGTAATGAA-----  
AAACAAGAGATC

Morus

GCGTACTAGCTAAAGCCTTACGTATGTCTGGTGGAGATCATATTCACGCAGGTAAGTGTAGTAGGGAACTTGAAGGGGAA  
AGAGAAATCACTTTAGGCTTTGTTGATTTACTACGTGATGATTTTATTGAAAAAGATCGAAGTCGTGGTATTTATTTTAC  
TCAAGATTGGGTTTCTCTACCAGGTGTTCTGCCCGTGGCTTCAGGGGGTATTACGTTTTGGCATATGCCTGCTTTGACCG  
AGATCTTTGGAGATGATTCCGTAACATAATTCGGTGGAGGAACTTTAGGACATCCTTGGGGAAATGCACCCGGTGCCGTA  
GCTAATCGAGTAGCTCTAGAAGCATGTGTAAGGCTCGTAATGAGGGACGTGATCTTGTCTGTTGAGGGTAATGAAATTAT  
TCGTGAGGCTAGTAAATGGAGTCCTGAACTAGCT---GCTGCTTGTGAA---GTGTGG---AAGGAAATCAAATTTGAA-  
--TTCGAGGCAATGGATACTTTGTAA-----  
ATGGCGATACATTTATACAAAACCTTCTACCCCGAGCACACGCAAAGGAGCCGTA-----GACAGG-----  
CAAGTGAAATCCAATCCACGAAAT-----  
AATTTGATCTATGGACAGCATCGTTGTGGTAAAGGTCGTAATGCCAGAGGAATCATTACCGCAGGGCATAGAGGGGGAGG  
TCATAAGCGTCTATACCGTAAAATCGATTTTCGACGGAATGAAAA---GACATATATGGTAAAATC-----  
--  
GTAACATAGAATACGACCCTAATCGAAATGCATACATTTGTCTCATACTATGGGGGTGGTGGAGAAAAGATATATTTT  
ACATCCCAGAGGGGCTCTAATTGGAGATACCATTGTTTCTGGT-----ACAGAAGTTCCTATAAAAAATG-----  
-----GAAATGCCCTACCTTTG-----  
ACCGATATGCCCTTAGGCACGGCCATACATAACATAGAAATCACACTTGGAAAGGGTGGACAATTAGCTAGAGCAGCAGG  
TGCTGTAGCGAAACTGATTGCAAAAGAGGGGAAATCGGCCACATTAATAATTACCTTCTGGGGAGGTCCGTTTGATACCCA  
AAAACCTGCTCAGCAACAGTCGGACAAGTGGGGAATGTTGGGGTGAACCAGAAAAGTTGGGTAGAGCCGGATCTAAATGT  
TGGCTAGGTAAGCGTCTGTAGTAAGAGGAGTAGTTATGAACCCTGTAGACCATCCCCATGGGGGTGGTGAAGGGAGGGC  
CCCAATTGGTAGAAAAAACCCGCAACCCCTTGGGGTTATCCTGCACTTGGAAAGAAGAAGTCGAAAAAGGAATAAATATA  
GTGATAATTTGATTCTTCGTCGCCGTAGTAAATAG-----  
ATGATTCAACCTCAAACCCATTTGAATGTAGCGGATAATAGCGGAGCCAGAAAATTGATGTGTATTGCAATCATAGGAGC  
T---  
AGTAATCGACGATATGCTAAGATTGGTGACGTTGTTGTTGCTGTAATCAAGGAAGCAATACCAAATACACCGCTAGAAAG  
ATCAGAAGTGATCAGAGCCGTAATTGTACGTACTTGTAAAGAACTCAAACGCGACAATGGTATGATAATACGATATGATG  
ACAATGCTGCAGTTGTTATTGATCAAGAAAAGA---  
AATCCAAAAGGAACCTCGAATTTTTGGCGCAATCGCCCGGGAATTAAGACAATTAATTTTCACTAAAATAGTTTCGTTAGC  
GCCTGAAGTATTGTAATGCTTAGT---  
CCCAAAAGAACCCGATTCCGTAACACCCATAGGGGAAGAATGAAAGGAATATCTTATCGAGGTAATCATATTTGCTTCGG  
TAGATATGCCCTTCAAGCGCTTGAACCTGCTTGGATCACATCTAGACAAATAGAAGCAGGGGCGACGAGCAATGACACGAA  
ACGCACGCCGCGGGCGAAAAATATGGGTACGTATATTTCCAGACAAACCAATTACAGTAAGACCTACAGAAAACACGTATG  
GGTTCAGGAAAAGGATCTCCTGAATATTGGGTAGCTGTCTTAAACCAGGTAGAATACTTTATGAAATGAGCGGAGTACC  
AGAAAATATAGCCAGAAAAGCTATTGCAATAGCGGCATCCAAAATGCCTATACGAACTCAATTCATTATTTTCAGGATAG-  
-----  
ATGACTAGAATTAACGAGGATATATAGCTCGAAGACGTAGAACCAAAATTCGTTTATTTGCATCAAGCTTTCAAGGGGC  
TCGTTCAAGACTTACTCGAACTATTACTCAACAGAAAATAAGAGCTTTGGTTTCGGCTCATCAGGATAGAGGTAGGCCAAA  
AGAGAGATTTTCGTCGTTTGTGGATCACTCGGATAAACCGAGTAATTCGAGCCAAT-----  
AAAGTATACTACAGTTATAGTACATTAATACACCATCTGTACAAGAGGCAGTTGCTTCTTAATCGTAAAATACTTGCA--  
-----CAAATAGCTATATTAATAGGAATTGTCTTTATATGATTTCCAATGAGATCTTAAAATAA-----  
-----  
ATGATAAAGAAGAGAAGGACC-----  
AACCGATATACAGAAGTCTATGCTATAGCCCAATAT---  
ATATCTATGTCTGCTCATAAAGCGCGAAGAGTAATTGATCAAATTCGTGGACGTTTCATATGCGGAAACGCTTATTATACT

AGAACTCATGCCGTATCGAGCATGTTATCCAATTTTAAAATTGGTTTATTCTGCAGCAGCAAATGCTAATCACAATATGC  
GCTTCAACGAAGCAAATTTAATAATTAGTAAAGCTGAAGTCAACGAGGGCAACACTGTGAAAAAATTTAAACCTCGAGCT  
CGAGGACGGGGTTATCCGATAAAAAGACCCACTTGTTCATATAACTATTGTACTGAAAGATTTAGATGTAGAGGAAGAATA  
TTTAGATTCATTTGCATTT-----GAAGATAAATATATTCACAAAAAATAG-

ATGGATGGAATCAAATATTTTCGTAGTTACAGACAAAAGTATTCGGTTATTGCTG---  
AAAAATCAATATACTTCTAATGTTCGAATCAGGATCAACTAGGACAGAAATAAAGCATTGGGTTCGAACCTTCTTTGGTGT  
CAAGGTAATAGCTATGAATAGTCATCGACTC-----CCGGGAAAG-----  
GGTAGAAGAATGGGACCTATTATGGGACATACAATGCATTACAGACGTATGATCATTACGCTTCAACCGGGTTATTATAT  
TCCACCTCTTATAAAGAAAAGCACTTAA-----

ATGGCAGTTCCGAAAAAACGTACTTCTATCTCAAAAAAGCGGATTTCGTAAAAATATTTGGAAAAAG---  
AAAGGATATTGGGCAGCATTGAAAGCTTTTTTCGTTAGGTAAATCT-----CTTTCTACAAGGAAT-----  
TCAAAAAGTTTTTTTT-----TATCCAACA-----  
----AAT---AAATAA-----

ATGGCCAAG---GGTAAAGATGCC---CGAGTAACGATTATTTTGGAAATGTACCAGTTGTCTT-----  
CGAAACCGCGTTAAT-----  
AAGGAATCAAGGGGCATTTCCCGATATATTACTCAAAAAAATCGACATAATACGCCTAGTCGATTGGAATTGAGAAAATT  
CTGTCCCTCTTGTACAAACATACGATTACGCGGGGAGCTAAAGAAATAG-----

ATGAAAATAAGGGCCTCCGTCCGTAAAATTTGTGAAAAATGTCGACTGATCCGTAGGCGAGGACGAATTATAGTAATTTG  
TTCC---AACCCAAGACATAAAACAAAGACAAGGATAA-----ATGGGT-----  
CAAGAGAAAGTAACAGTATCTACT-----CGGCCACTACAGTGGAAGTGTGTTGAATCA---AGAGCAGAC---  
AGTAAACGTCTT---

TATTATGGACGCTTTCTTCTGGCTCCACTTATGAGAGGACAAGCCGATACAATAGGCATTGCGATGCGAAGAGCTCTGCT  
TGGAGAAATAGAAGGAACATGTATCACACGCGCAAAATCCGAGAAAATACCACATGAATATTCTACCATAGTCGGTATTC  
AAGAATCCGTACATGAAATTTAATGAATTTGAAAGAAATTTGATTGAGAAGTAATCTGTATGGAACCTCGCGAT---  
GCGTCTATTTGTGTCAAAGGTCCCGGATATGTAACCGCTCAAGATATCATCTTACCACCTTCCGTGGAAATCGTTGATAA  
TACACAACATATAGCTAATCTAACAGAACCAATAACCTTGTGTATTGAATTACAAATCGAGAGGAATCGCGGATATCGTA  
TAAAAACGCCA---ATAATTTTCAAAACGGA---AGTTATCCT-----  
ATAGATGCTGATTTCATGCCTGTTTCGAAATGCAAATCATAGTATTTCATTCTTATGTGAATGGAATGAA-----  
AACCAAGAAATA

Nandina

GTGTAAGTAAAGCGTTACGTATGTCTGGTGGAGATCATATTCACGCTGGTACCGTAGTAGGTAAGTAACTGGAAGGGGAA  
AGAGAGATCACTTTGGGCTTTGTTGATTTATTACGTGATGATTTTATTGAAAAAGACCGAAGTCGCGGTATTTATTTTAC  
CCAAGATTGGGTCTCTTACCAGGGGTTCTACCCGTGGCTTCAGGGGGTATTTCATGTTTGGCATATGCCTGCTCTGACCG  
AGATCTTTGGGGATGATTCCGTACTACAGTTCGGTGGAGGAACTTTAGGACACCCTTGGGGAAATGCACCGGGTGCCGTA  
GCTAATCGAGTAGCTCTAGAAGCGTGTGTACAAGCTCGTAATGAGGGACGTGATCTTGTCTCGTGAAGGTAATGAAATTAT  
CCGTGCGGCTTGCAAATGGAGCCCTGAACTAGCT---GCTGCTTGTGAG---GTATGG---AAGGAGATCAAATTTGAA-

---TTTGAAGCAATGGATACTTTGTAA-----  
ACGGCGATACATTTATACAAAACCTTCTACTCCGAGCACACGAAATGGAACCGTC-----GGCAGT-----  
CAAGTGAAATCCAATCCACGAAAT-----  
AATTTGATCTATGGACAGCGTCGTTGCGGTAAAGGTGCGTAATGCCAGAGGAATCATTACCGCAAGGCATAGAGGGGGAGG  
TCATAAGCGTCTATACCGTAAAATCGATTTTCGACGGAATGAAAA---GACATATCTGGTAGAATC-----  
--

GTAACCATAGAATACGACCCTAATCGAAATGCATACATTTGTCTCATACTATGGGGATGGTGAGAAGAGATATATTTT  
ACATCCCAGAGGGGCTATAATTGGAGATACCATTGTTTCTGGT-----ACAGAAGTTCCTATCTCAATG-----  
-----GAAATGCCCTACCTTTG-----

ACCGATATGCCCTTAGGCACGGCCATACATAACATAGAAATCACACTTGGAAAGGGTGGACAATTAGCGAGAGCTGCGGG  
TGCTGTAGCGAAACTGATTGCAAAAGAGGGTAAATCGGCCACATTAATAATTACCATCTGGGGAGGTCCGTTTGATATCCA  
AAAAGTCTCAGCAACAGTCGGACAAGTGGGTAATGTTGGGGTGAACCAGAAAAGTTGGGTAGAGCCGGATCTAAGCGT  
TGGCTAGGTAAGCGTCTGTAGTAAGAGGAGTAGTTATGAACCCTGTAGACCATCCCCATGGGGGTGGTGAAGGAAGGGC  
CCCAATTGGTAGAAAAAACCCACAACCCTTGGGGTTATCCTGCGCTTGGGAAGAAGAAGTAGAAAAAGGAATAAATATA  
GTGATAGTTTGATTCTTCGTGCGCGTAGTAA-----

ATGATTCAACCTCAAACCCATTTAAATGTAGCGGACAACAGCGGGCTAGAGAATTAATGTGTATTTCGAATCATAGGAGC  
T---

AGTAATCGACGATATGCTCATATTTGGTGACGTTATTGTTGCTGTAATCAAAGAAGCAGTGCCCCATATGCCTCTACAAAG  
ATCAGAAGTGATCAGAGCTGTAATTGTACGTACAGTAAAGAACTCAAACGTGACAACGGTATGATAATACAATATGATG

ACAATGCAGCAGTTGTCATTGATCAAGAAGGA---  
AATCCAAGAGGAACACTCGAGTTTTTGGCGCGATCGCTCGAGAATTGAGACAGTTGAATTTTACGAAAATAGTTTCATTAGC  
TCCTGAGGTATTA---ATGCTTAGT---  
CCCCAAAAGAACCAGATTCCGTAACAACATAGAGGAAGAATGAAGGGAATATCTTATCGAGGCAATCATATTTGTTTCGG  
TAGATATGCTCTTCAGGCACCTTGAACCCGCTTGGATCACTTCTAGACAAAATAGAAGCGGGGCGAAAATCAATGGCAGCAT  
ATGCGCGTCTGGTGGAAAAATATGGATACGTATATTTCCAGACAAACCTGTTACAGTAAGACCTACAGAAACGCGTATG  
GGTTCGGGAAAAGGATCTCCTGAATATTGGGTATCTGTCTGTTAAACCAGGTCTGAATACTTTATGAAATGGGTGGAGTATC  
AGAAATTGCAGCCAGAGAAGCTATTTCAATAGCTGCGTCCAAAATGCCTATACGAACCTCAATTCGTTATTGCGGGATAG-  
-----  
ATGACCAGAATTAGACGAGGGTATATAGCTCGGAGACGTAGAACAAAAAATTCGTTTATTTGCATCAACCTTTTCGAGGGGC  
TCATTCAAGACTTACTCGAACTATTATTCAACAAAAAATGAGAGCTTTGGCTTCTTCTCATCGGGATAGGGGCAGACAAA  
AGAGAAAATTTTCGTCGTTTATGGATCACTCGGATAAATGCAGCAATTCGTGAGATT-----  
GGGGTATCCTATAGTTATAGTAGATCCATAAAAAGATCTGTACAAGAGTCAGTTGCTTCTTAATCGTAAAATACTTGCA--  
-----  
CAAATAGCCATATCAAATACAAATTGTCTTTACATGATTTCCAAGGAGATCATTAAATTTAAATAA-----  
-----ATG-----  
-----GAACCAGAGGTAGAAGTATACGCTTTAGGTCAACAT---  
ATATGTATGTCTGCTCACAAAGCGCGAAGAGTAATTGATCAGATTCGTGGGCGTCCCTACGATGAAATACTTATGATACT  
AGAACTCATGCCTTATCGAGCGTGTATCCCATTTTTAAATTAGTTTATTCTGCAGCAGCAAATGCTACTAACAATAAGG  
GTTTCAACAAAACGGCTTTAATAATTAGTCAAGCCGAAGTTAACGAGGGTACTGTCTGAAAAAGTTAAAACCTCGAGCT  
AGAGGACGTAGTTATCCGATAAAAAGACCTACCTGTATATAACTATCGTATTACAAGATATATCTAAAGATAAAAACCT  
T-----TACATATGGCTA-----  
AGAAAAAAGGGGGATGGATATATAAAGAGAAGTATATCGATATTAGAGAGAAGTATGAATATTTTCTACATGAAGCGCT  
AAATCGGGGCAGAATGGAATGGGCTAAT-----  
AGCGGGTACGAGGTGGTATGGGACAAAAAATAAATGGATGGAATCAAATATGCAGTATTTACAGACAAAAGTATTCGGTT  
ATTGGG---  
AACAAATCAATATACTTCTAATGTGCAATCAGGATCAACTAGGACAGAAAATAAAGCATTGGGTGCAACTCTTTTTTGGTGT  
CAAGGTAATAGCTATGAATAGTCATCGACTC-----CCGGGAAAG-----  
GGTAGAAGAATGGGACCCATTATGGGACATACAATGCATTACAGACGTATGATCATTACGCTTCAACCGGGTTATTCTAT  
TCCACCTCTTAGAAAAGAAAAGAACTTAA-----  
ATGGCGGTTCCGAAGAAACGTACTTCTATATCAAAAAAGCGTATTTCGTAATAATTTGGAAACTA---  
AAAGGGCATTGGGCGAGCAAAAAAGCAATTTCTTTAGCAAAATCT-----ATTTCTACCGGAAAT-----  
TCAAAAAGTTTTTTT-----  
GTGCAACAAACAAGTAATAAAGTCTTGAATAA-----  
-----ATGGCCAAG---GGTAAAGATGTC---  
AGAATAAGAGTTATTTTTGGAATGTAACAGTTGTGTC-----CGAAACGATCTTAAT-----  
AAGGAATCACCTGGCATTTCAGATATATTACCCAAAAGAATCGACACAATACGCCAGTCGATTGGAATTGAGAAAATT  
CTGTCCCTATTGTTACAAACATACGATTCATGGGGAGATAAAGAAA-----  
ATGAAAATAAGGGCCTCCGTTTCGTAATAATTTGTGAAAAATGTGCACTGATCCGTAGGCGGGGACGAATTATAGTAATTTG  
TTCC---AACCCAAGGCATAAACAGAGACAAGGA-----ATGCTT-----  
CGAGAAGAAGTAGCAGTATCTACT-----CGGACACTACAGTGGAGGTGTGTTGAATCA---AGAACAGAC---  
AGTAAGCGTCTT---  
TATTATGGCCGTTTTGTTCTGTCTCCGCTTATGAAAGGTCAAGCCGATACGATCGGCATCGCGATGCGAAGGGCTTTGCT  
TGGAGAAATCGAAGGAACATGTATAACACATGCAAAATCTGAAAAGATACCACATGAATATTCTACCATAGTTGGTATTG  
AAGAATCAGTACATGAAATCTTAATGAATTTGAAAGAAATTTGATTGAGAAGTAATCTGTATGGAACCTTGCAT---  
GCGTCTATTTGCGTCAAGGGTCTATAAACATAAAGTAAAGACATCATCTCACCGCCTTCTGTGGAATCGTTGATAC  
TACACAGCATATAGCTAGCCTGACGGAACCAATTTGATTTGTGATTGGATTACAAATCGAGAGGAATCGAGGATATCGTA  
TGAAAACACCA---AATAAGGCTCAAAATGGA---AGTTATCCT-----  
ATAGATGCAGTATTCATGCCTGTTTCGAAATGCGAATCATAGTATTCATTCTTATGGGAATGGGAATGAA-----  
AAACAAGAGATA  
Nicotiana  
GGGTATTAGCAAAAGCGTTACGTATGTCTGGTGGAGATCATATTCCTGTTACCGTAGTAGGTAACCTTGAAGGTGAA  
AGAGACATAACTTTGGGCTTTGTTGATTTACTGCGTGATGATTTTGTGTAACAAGATCGAAGTCGCGGTATTTATTTTAC  
TCAAGATTGGGTCTCTTTACCAGGTGTTCTACCCGTGGCTTCAGGAGGTATTCACGTTTGGCATATGCCTGCTCTGACCG  
AGATCTTTGGGGATGATTCCGTAACAGTTCGGTGGAGGAACCTTAGGACATCCTTGGGGTAATGCGCCAGGTGCCGTA  
GCTAATCGAGTAGCTCTAGAAGCATGTGTAAGGCTCGTAATGAAGGACGTGATCTTGTCTCAGGAAGGTAATGAAATTAT  
TCGCGAGGCTTGCAAAATGGAGCCCGGAACCTAGCT---GCTGCTTGTGAA---GTATGG---AAAGAGATCGTATTTAAT-

--TTTGCAGCAGTGGACGTTTTGGATAAG-----  
ATGGCGATACATTTTATACAAAACCTTCTACCCCGAGCACACGCAATGGAACCGTA-----GACAGT-----  
CAAGTGAAATCCAATCCACGAAAT-----  
AATTTGATCTATGGACAGCATCATTGTGGTAAAGGTCGTAATGCCAGAGGAATCATTACCGCAAGGCATAGAGGGGGAGG  
TCATAAGCGTCTATACCGTAAAATCGATTTTCGACGGAATGAAAAA---GACATATATGGTAGAATC-----  
--  
GTAACCATAGAATACGACCCTAATCGAAATGCATACATTTGTCTCATACTATGGGGATGGTGAGAAGAGATATATTTT  
ACATCCCAGAGGGGCTATAATTGGAGATACCATTGTTTCTGGT-----ACAGAAGTTCCTATAAAAAATG-----  
-----GGAAATGCCCTACCTTTG-----  
ACCGATATGCCCTTAGGCACGGCCATACATAACATAGAAATCACACTTGGAAAGGGTGGACAATTAGCTAGAGCAGCGGG  
TGCTGTAGCGAAACTGATTGCAAAAGAGGGGAAATCGGCCACATTAATAATTACCTTCTGGGGAGGTCCGTTTGATATCCA  
AAAACCTGCTCAGCAACAGTCGGACAAGTGGGGAATGTTGGGGTGAACCAGAAAAGTTTGGGTAGAGCCGGATCTAAGCGT  
TGGCTAGGTAAGCGTCTGTAGTAAGAGGAGTAGTTATGAACCCTGTAGACCATCCCCATGGGGGTGGTGAAGGGAGAGC  
CCCAATTGGTAGAAAAAACCCACAACCCCTTGGGGTTATCCTGCACTTGGAAAGAAGAAGTAGAAAAAGGAATAAATATA  
GTGATAATTTGATTCTTCGTCGCCGTAGTAAA-----  
ATGATTCAACCTCAGACCCATTTAAATGTAGCGGATAACAGCGGGGCTCGAGAATTGATGTGTATTGCAATCATAGGAGC  
T---  
AGCAATCGTCGATATGCTCATATTGGTGACGTTATTGTTGCTGTGATCAAAGAAGCCGTACCAAATATGCCCTAGAAAG  
ATCAGAAGTAGTCAGAGCTGTAATTGTGCGGACCTGTAAAGAACTCAAACGTGACAACGGGATGATAATACGATATGATG  
ACAATGCTGCAGTTGTTATTGATCAAGAAGGAAGGAAATCAAAGGAAGTTCGAATTTTTGGTGCAATCGCCCGGAATTG  
AGAGAATTAATTTTACTAAAATAGTTTCATTAGCTCCCGAGGTATTA---ATGCTTAGT---  
CCCCAAAAGAACCAGATTCGGTAAACAACATAGAGGAAGAATGAAGGGAATATCTCATCGAGGTAATCATATTTCTTTTCGG  
TAAATATGCTCTTCAGGCACCTTGAACCTGCTTGGATTACATCTAGACAAATAGAAGCAGGCCGACGAGCAATGACACGAA  
ATGCACGTCGTGGTGGAAAAATATGGGTACGTATATTTCCAGACAAACCAGTTACACTAAGACCCGCAGAAACACGTATG  
GGTTCAGGAAAAGGATCCCCTGAATATTGGGTAGCTGTTGTTAAACCGGGTTCGAATACTTTATGAAATGGGTGGAGTAAC  
AGAAAATATAGCCAGAAGGGCTATTTCACTAGCAGCATCTAAAATGCCTATACGAACTCAATTCATTATTTTCG-----  
-----  
ATGACCAGAATTAACGGGGATATATAGCTCGGAGACGTAGAACAATAATTCGTTTATTTGCATCAAGCTTTTCGGGGGGC  
TCATTCAAGGCTTACTCGAACTATTACTCAACAGAAAATAAGAGCTTTAGTTTTCGGCTCATCGGGATAGGGATAGGAAAA  
AGAGAGATTTTCGTCGTTTGTGGATCACTCGGATAAACCGCAGTAATTCGCGAAAGG-----  
GGAGTATCCTATAGTTATAGTAGATTAATACACGATCTGTACAAGAGACAGTTGCTTCTTAACCGTAAAATACTTGCA--  
-----  
CAAATAGCTATATCAAATAGGAATTGTCTTTATATGATTTTGAACGAAATCATAAAGGAAGTAGATTGGAAAGAATCCAC  
CAGAATAATT-----ATGCTAAAG-----  
-----AAGAAAAAACAGAAGTATATGCTTTAGGTGAACAT---  
ATATCTATGTCTGCTGACAAAGCACGAAGAGTAATTAATCAAATTCGCGGCCGTTCCCTATGAGGAAACGCTTATGATACT  
AGAACTCATGCCCTATCGAGCATGTTATCCCATTTTGAATTTGATTTATTCTGCAGCAGCAAATGCTAGTTACAATATGG  
GTTCCAGCGAAGCCAATTTAGTCATTAGTAAAGCCGAAGTCAATGGAGGTACTACTGTGAAGAAATTTGAAACCTCGAGCT  
CGAGGACGTAGTTTTCCAATAAAAAGATCGACCTGTCAATAACTATTGTAATGAAAGATATATCTTTAGATGAT---  
GAATATGTAGAGATGTATTTCG-----TTA-----  
AAAAAACGAGA---TGG-----AAAAAAAATCTACAGCTATGCCGTATCGTGATATG-----  
-----  
TATAATAGTGGGGGATTATGGGACAAAAATAAATGGATGGAATCAAATATGCAGTATTTACAGACAAAAGTATTCGGTT  
ATTGGG---  
AAAAATCAATATACTTCTAATGTGCAATCAGGATCAACTAGGACAGAAAATAAGCATTGGGTGCAACTCTTCTTTGGTGT  
CAAGGTAATAGCTATGAATAGTCATCGACTT-----CCGGGAAAG-----  
AGTAGAAGAATGGACCTATTATGGGACATACAATGCATTACAGACGTATGATCATTACGCTTCAACCGGGTTATTCTAT  
TCCACCTCTTAGAAAGAAAAGAACTTAA-----  
ATGGCAGTTCACAAAAAACGCACTTCGACATCAAAAAAGCGTATTCGTAAAAATATTTGGAAAAGG---  
AAGGGATATTCGATCGCATTAAAGGCTTTTTTCATTAGCGAAATCT-----CTTTCTACCGGGAAT-----  
TCAAAAAGTTTTTTT-----GTACGCCAA-----  
ACAAAAATAAAT---AAG-----  
ATGGCCAAG---GGGAAAGATGTC---CGAGTAACGGTGATTTTGGAAATGTACTAGTTGTGTC-----  
CGAAACAGTGTTGAT-----  
AAGGTATCAAGAGGATTTTCCAGATATATTACTCAAAGAACCAGGACACAATACGCCTAATCGATTAGAATTGAAAAAAT  
CTGTCCCTATTGTTACAAACATACGATTCATGGGGAGATAAAGAAA-----  
ATGAAAATAAGAGCTTCGGTTCGTAAAATTTGTGAAAAATGTGCGACTAATCCGTAGGCGGGGACGAATTATAGTAATTTG

TTCC---AACCCGAGACATAAAACAAAGACAGGGA-----ATGGTT-----  
CGAGAGAAAGTAACAGTATCTACT-----CGGACACTACAGTGGAAGTGTGTTGAATCA---AGAACAGAC---  
AGTAAACGCCTT---  
TATTATGGACGCTTTATTCTGTCTCCACTTATGAAAGGCCAAGCCGACACAATAGGCATTGCGATGCGAAGAGCTTTACT  
TGGAGAAATAGAAGGAACATGTATCACACGTGTAATACTGAGAAAAGTCCCACATGAATATTCTACCATAACGGGCATT  
AAGAATCGGTACATGAAATTTAATGAATTTGAAAGAAATTATATTAAGAAGTAATCTATATGGAACCTTCTGAC---  
GCATCTATTTGTGTCAAGGGTCTGGATCTGTAAGTCCCAAGATATCATCTTGCCGCCTTATGTAGAAATCGTTGATAA  
TACACAACATATAGCCAGTTTAAACGGAACCAATTGATTTTTGTATTGGATTACAAATAGAGAGAAATCGTGGATATCTTA  
TAAAAACGCCA---CATAACTTTCAAGATGGA---AGTTATCCT-----  
ATAGATGCTGTATTTCATGCCTGTTTCGAAACGCGAATCATAGTATTTCATTCTTATGGGAATGGGAATGAA-----  
AAACAAGAGATA

Nuphar

GTGTACTAGCTAAAGCGTTGCGTATGTCTGGGGGGGATCATATTCCTCTGGTACCGTAGTAGGTAAGTGGGAAGGGGAA  
CGAGATGTCACTTTGGGCTTTGTTGATTTACTACGTGATGATTTTTATTGAAAAAGACCGGAGTCGCGGTATTTATTTTAC  
TCAAGATTGGGTATCTATGCCAGGTGTTCTGCCCGTGGCTTCAGGGGGTATTACGTTTTGGCATATGCCTGCCCTGACCG  
AGATATTTGGGGATGATTCCGTGCTACAGTTCGGTGGAGGAACCTTTGGGACACCCTTGGGGTAATGCACCTGGTGCAGTA  
GCTAATAGGGTAGCTTTAGAAGCGTGTGTACAAGCTCGTAATGAGGGACGTGATCTTGCTCGTGAAGGTAATGAAGTTAT  
CCGTGAAGCTAGCAAATGGAGTCTGAACTGGCT---GCTGCTTGTGAG---GTATGG---AAGGAGATCAAATTCGAA-  
--TTCGAAGCAATGGATGTCTTG-----  
ATGGCGATACATTTATACAAAACCTTCTACCCCTAGCACGCGCAAAGGAGCCGTA-----GACAGT-----  
CAAGTGAAATCCAATCCACGAACA-----  
AATTTGATCTATGGACAGCATCGTTGTGGTAAAGGTCGTAATGCCAGAGGAATCATTACCGCAAGGCATAGAGGGGGAGG  
TCATAAGCGTCTATACCGTAAAATCGATTTTCGACGGAATGAAAA---GACATATCTGGTAGAATC-----  
--

GTAACCATAGAATACGACCCTAATCGAAATGCATACATTTGTCTCATACTATGGGGATGGTGAAGAGATATATTTT  
ACATCCCAGAGGGGCTATAATTGGAGATACCATTGTTTCTGGT-----ACAGAAGTTCCTATATCAATG-----  
-----GGAAATGCCCTACCTTTGAGT---  
ACCGATATGCCCTTAGGCACGGCCATACATAACATAGAAATAACACTTGGAAAGGGTGGACAATTAGCTAGAGCAGCAGG  
TGCTGTAGCGAACTGATTTGCAAAAGAGGGTAAATCGGCCACATTAAGATTACCATCTGGAGAGGTTTCGTTTGATATCCA  
AAAACCTGCTCAGCAACAGTCGACAAAGTGGGTAATGTTGGGGTGAACCAGAAAAGTTTGGGTAGAGCCGGATCTAAATGT  
TGGCTAGGTAAGCGTCTGTAGTAAGAGGAGTAGTTATGAACCCTGTAGACCATCCCCATGGAGGTGGTGAAGGGAGGGC  
CCCGATTGGTAGAAAAAACCCACAACCTTGGGGTTATCCCGCGCTTGGAAAGAGGAGTAGGAAAAGGAATAAATATA  
GTGATATTTTTATTCTTCGTCGCCGT-----

ATGATTCAACCTCAGACCCATTTGAATGTAGCGGACAACAGCGGAGCTCGAAAACCTGATGTGTATTGGAATCATAGGAGC  
T---  
AGTAATTACCGATATGCTCATATCGGTGACGTTATTGTTGCTGTAATCAAAGAAGCAGTGCCAAATATGCCCTGGAAAG  
ATCAGAAGTAATCAGAGCTGTAATTGTACGTACATGTAAAGAACTCAAACGCGACAACGGTATGATAATACGGTATGATG  
ACAATGCAGCAGTTGTCATTGATCAAGAAGGA---  
AATCCAAAAGGCCTCGAGTTTTTGGTTTCGATTGCTCGTGAATTGAGACAGTTAAATTTCACTAAGATAGTCTCATTAGC  
TCCCGAAGTATTA---ATGCTT---

AACCCCAAAGAACCAGGTTTTCGTAAACAACATAGAGGAAGAATGAAGGGAGTATCTTATCGTGGCAATCATATTTGTTT  
CGGTAGATATGCGCTTCAGGCACTTGAACCCGCTTGGATCACATCTAGACAAATAGAAGCAGGGCGACGCGCAATGGCAC  
GATATGCCCGTCTGGCGGAAAAATATGGGTACGTATATCCCCGACAAACCGTTACACTAAGACCCGCGGAAACACGT  
ATGGGTTCCGGGAAGGGATCTCCTGAATATTGGGTATCCGTCGTTAAACCGGATCGAATACTTTATGAAATGGGCGGAGT  
ATCAGAAAACCGTAGCCAGAGCCGCTATGGAACCTAGCTGCGCGCAAAATGCCTATACGAACTAAATTCGTT-----

ATGACAAGAGTTAGACGTGGATATATTGCGCGGAGGCGTGAAGAAAAATTCGTTTATTTGCATCAACCTTTTCGAGGAGC  
TCATTCAAGACTTACTCGAACTGCTACTCAACAGAAAAATAAGGGCTTTGGTTTCCAGCCATAGGGGTAGAGGAAGGCAAA  
AGCGAGATTTTCGTCGTTTGTGGATCACTCGGATAAATGCAGTAACCCGCGAGAAT-----  
GGGGTACCCTATAGT-----CGATTAATACACGATCTGCGCAAGAGGCGAGCTCCTTCTTAATCGTAAAATACTTGCA--  
-----CAAATAGCTATATCAAATAGGAATTGCCTTTACATGATATCCAATGATATCATCAA-----

ATGATAAAGAAG-----

ACCCAGGGTACAGAAATACGAGCTTTAGCTCGACAT---

ATAGGTATGTCTGCTCAAAAAGCACGAAGGGTAATTGATCAAATTCGTGGTTGCTCCTATGAGCAAACACTTATGATACT  
GGAACCTCATGCCTTATCGAGCATGTTACCCCATTTTCAAATTAGTTTTATTCCGCGAGCAGCAAATGCTAGTCACAATAGGG  
GTTTGAAGAAGCTGATTTATTTATTAGTAAAGCCGAAGTCAACGAAGGTGTTATCGTCAAAAGGTTAAACCCGAAGCT



CGGGGACGTAGTTACCCAATAAAAAAGACCCACCTGTCATATAACTATTGTATTGAGCGAAAGACCTAACTTCACTTTGAA  
AAATATTTGA-----

-----  
ATGGATGGAATCAAATATGCAGTATTTACAGAAAAAGTATTCGGTTATTGGGG---  
ACAATCAATATACTTCTAATGTCTGAATCAGGATCAACTAGGACAGAAATAAAGCATTGGATCGAACTCTTCTTTGGTGT  
CAAGGTAGTAGCTATGAATAGCCATCGACTC-----CCGGGAAAG-----  
GGTAGAAGAATGGGACCTATTATGCGACATACAATGCATTACAGACGTATGATCATTACGCTTCAACCGGGTTATTCTAT  
TCCACCTCTTATAGAGAAAAAGAACTTAA-----  
ATGGCGGTTCCAAAAAACGTACTTCTATATCAAAAAAGCATATTCGTAGAAAATTTTGGGAAGAGA---  
AAGGGATATTGGGCAGCGGTAAAAGCTTTTTCTTTAGCTAAATCC-----ATTTCTACCGGTTAT-----  
TCAAAAGGTTTTTTT-----GTACGACAAAAAAA-----

-----  
ATGCCCAAG---GGTAAAAATCCC---AGAGTTACGGTTATTTTGGGAATGTACCAGTTGTGTC-----  
CGAAATGGTGCCAATAAGAAG-----  
AAGGAATCACCGGGCATTTCAGATATATTACTCAAAGAATCGACACAATACACCTGGTTCGATTGGAATTGAAGAAATT  
CTGTCCCTATTGTTACAAACATACGATTCACGGGGAGATAAAGAAA-----  
ATGAAAATAAGAGCCTCTGTTTCGTAAGATTTGTGAAAAATGTCGACTGATCCGTAGGCGAGGACGAATTATAGTAATTTG  
TTCC---AATCCGAAACATAAACAGAGACAGGGA-----ATGGTT-----  
CGAGAGGAAGTGCCAGTATCCACT-----CGGACACTACAGTGGAAAGTGTGTTGAATCA---AGAGCAGAC---  
AGCAAGCGCCTT---  
TATTATGGTCGTTTTCGTTTTATCCCCACTTATGAAGGGTCAAGCCGATACAATAGGTATCGCGATCGAAGGGGCTTTACT  
TGGAGAACTAGAAGGAACATGTATTACGCGCGCAAAATCTGATAAGGTACCACATGAATATTCTACAATAGTAGGTATTG  
AAGAATCAGTCCATGAAATTTAATGAATTTGAAAAAGATTGTATTTAGAAGTGATCTGTACGGAACTCTCGAC---  
GCATCCATCTGTGTCAGGGGACCTAGACACGTAAGTCTCAAGATATCATCTCACCACCTTCTGTAGAAAATAGTTGATAC  
TACACAGCATATAGCTATCCTAACAGAACCGGTTGATTTGTGCATTGAATTAATAAATTGAGAGGGGTCGTGGATATTGTA  
TGAGAACCCCC---AATAACTATCAAGACGGA---AGTTATCCT-----  
ATAGATGCTGTATCCATGCCTGTTTCGAAATGCGAATCATAGTATTTCATTCTTATGGGAATGGGAATGAA-----  
AAACAAGAGATA

Nymphaea

GTGTAAGCTAAAGCGTTGCGTATGTCTGGGGGGGATCATATTCACGCTGGTACCGTAGTAGGTAAACTGGAAGGGGAA  
CGAGATGTCACCTTTGGGCTTTGTTGATTTACTACGTGATGATTTTATTGAAAAAGACCGGAGTCGCGGTATTTATTTTAC  
TCAAGATTGGGTATCTATGCCAGGTGTTCTGCCCGTGGCTTCAGGGGGTATTACGTTTGGCATATGCCTGCCCTGACCG  
AGATATTTGGGGATGATTCCGTGCTACAGTTCGGTGGAGGAACCTTTGGGACACCCTTGGGGGAATGCACCTGGTGCAGTA  
GCTAATAGGGTAGCTTTAGAAGCGTGTGTACAAGCTCGTAATGAGGGACGTGATCTTGCTCGTGAAGGTAATGAAGTTAT  
TCGTGAAGCTAGCAAATGGAGTCTGAACTGGCT---GCTGCTTGTGAG---GTATGG---AAAGAGATCAAATTCGAA-  
--TTCGAAGCAATGGATGTCTTG-----

ATGGCCATACATTTATACAAAACCTTCTACCCCTAGCACACGCAAAGGAGCCGTA-----GACAGT-----  
CAAGCGAAATCCAATCCACGAACA-----  
AAATTGATCTATGGACAGCATCGTTGTGGTAAAGGTGCGTAATGCCAGAGGAATAATTACCGCAAGGCATAGAGGGGGAGG  
TCATAAGCGTCTATACCGTAAATCGATTTTCGACGGAATGAAAA---GACATATCTGGTAGAATC-----  
--

GTAACCATAGAATACGACCCTAATCGAAATGCATACATTTGTCTCATACTATGGGGATGGTGAAGAGATATATTTT  
ACATCCCAGAGGGGCTATAATTGGAGATACCATTGTTTCTGGT-----ACAGAAGTTCCTATATCAATG-----  
-----GGAAATGCCCTACCTTTG-----

ACCGATATGCCCTTAGGCACGGCCATACATAACATAGAAATAACACTTGGAAAGGGTGGACAATTAGCTAGAGCAGCAGG  
TGCTGTAGCGAAACTGATTTGCAAAAAGAGGGTAAATCGGCCACATTAAGATTACCATCTGGAGAGGTTTCGTTTATATCCA  
AAAACCTGCTCAGCAACAGTCGACAAAGTGGGTAATGTCTGGGGCGAACCAGAAAAGTTTGGGTAGAGCCGGATCTAAATGT  
TGGCTAGGTAAGCGTCTGTAGTAAGAGGAGTAGTTATGAACCCTGTAGACCATCCCCATGGAGGTGGTGAAGGGAGGGC  
CCCGATTGGTAGAAAAAACCCACAACCTTGGGGTTATCCCGCGCTTGGAAAGAGGAGTAGGAAAAGGAATAAATATA  
GTGATATTTTTATTCTTCGTCGCCGT---AAG-----

ATGATTCAACCTCAGACCCTTTTGAATGTAGCGGACAACAGCGGAGCCCGAAAACCTTATGTGTATTTCGAATCATAGGAGC  
T---  
AGTAATTACCGATATGCTCATATCGGTGACGTTATTGTTGCTGTAATCAAAGAAGCAGTGCCAAATATGCCCTGGAAAG  
ATCAGAAGTAATCAGAGCTGTAATTGTACGTACATGTAAAGAAGTCAAGCGGACAACGGTATGATAATCCGGTATGATG  
ACAATGCAGCAGTTGTCATTGATCAAGAAGGA---  
AATCCAAAAGGCACCCGAGTTTTTGGTTTCGATTGCTCGTGAATTGAGACAGTTAAATTTCACTAAGATAGTCTCATTAGC

TCCCGAAGTATTA---ATGCTTAGT---  
CCCCAAAAGAACCAGGTTTTTCGTAAACAACATAGAGGAAGAATGAAAGGAGTATCTTATCGGGGCAATCGTATTTGTTTCGG  
TAGATATGCGCTTCAGGCACCTTGAACCCGCTTGATCACATCTAGACAAATAGAAGCAGGGCGCCGGGCAATCTCACGAT  
ATGCCCGTCGTGGCGGAAAAATATGGGTACGTATATTCGCCGACAAACCCGTTACACTAAGACCCGCGGAAACACGTATG  
GGTTCGGGGAAGGGATCTCCCGAATATTGGGTATCCGTCGTTAAACCCGATCGAATACTTTATGAAATGGGCGGAGTATC  
AGAAACCGTAGCCAGAGCCGCTATGGAAATAGCGGCGCGCAAAATGCCTATACGAACAAAATTCGTTATTGCGGAA-----  
-----

ATGACAAGAGTTAGACGTGGATATATTGCGCGGAGGCGTCAAGAAAAATTCGTTTATTTGCATCAAGCTTTCGAGGAGC  
TCATTCAAGACTTACTCGAACTGCTACTCAACAGAAAAATAAGGGCTTTGGTTTTCCAGCCATAGGGGTAGAGGAAGGCAAA  
AGCGAGATTTTCGTCGTTTTGTGGATCACTCGGATAAATGCAGTAACCCGGGAGAAT-----  
GGGGTACCCTATAGT-----CGATTAATACACGATCTGCGCAAGAAGCAGCTCCTTCTGAATCGTAAAATACTTGCA--  
-----CAAATAGCTATATCAAATAGGAATTGCCTTTACATGATTTCCAATGATATAATCAAA-----  
-----

ATGATAAAGAAG-----  
ACCTCGGGTACAGAAATACGAGCTTTAGCTCGACAT---  
ATAGGTATGTCTGCTCAAAAAGCACGAAGGGTAATTGATCAAATTCGCGGTTGCTCCTATGAGCAAACACTTATGATACT  
GGAACCTCATGCCTTATCGAGCATGTTACCCCATTTTTCAAATTAGTTTTATTCCGCAGCAGCAAATGCTAGTCACAATAGGG  
GTTTTGAAAGAAGCTGATTTATTTATTAGTAAAGCCGAAGTCAACGAAGGTGTTATCGTCAAAAGGTTAAAACCCGCGAGCT  
CGGGGACGTAGTTACCCAATAAAAAGACCCACCTGTCAATAACTATTGTATTGAGCGAAAGACCTAACTTCAATTTTAA  
AAATATTTGA-----  
-----

ATGGATGGAATCAAATATGCAGTATTTACAGAAAAAGTATTCGGTTATTGGGG---  
AACAAATCAATATACTTCTAATGTGCAATCAGGATCAACTAGGACAGAAATAAAGCATTGGATCGAACTCTTCTTTGGTGT  
CAAGGTAGTAGCTATGAATAGCCATCGACTC-----CCGGGAAAG-----  
GGTAGAAGAATGGGACCTATTATGCGACATACAATGCATTACAGACGTATGATCATTACGCTTCAACCGGGTTATTCTAT  
TCCACCTCTTATAGAGAAAAAGAACTTAA-----  
ATGGCGGTTCCAAAAAACGTACTTCTATATCAAAAAAGCATATTCGTAGAAAATTTTGGAAAGAGA---  
AAGGGATATTGGGCAGCGGTAAAAGCTTTTTCTTTAGCTAAATCC-----ATTTCTACCGGTTAT-----  
TCAAAAGGTTTTTTT-----GTACGACAAAAAAA-----  
-----

ATGCCCAAG---GGTAAAAATCCC---AGAGTTACGGTTATTTTGGAAATGTACCAGTTGTGTC-----  
CGAAATGGTGCCGATAAGAAG-----  
AAGGAATCACCGGGCATTTCAGATATATTACTCAAAAGAATCGACACAATACGCCTGGTTCGATTGGAATTGAAGAAATT  
CTGTCCCTATTGTTACAAACATACGATTCACGGGGAGATAAAGAAA-----  
ATGAAAATAAGAGCTTCCGTTTCGTAAGATTTGTGAAAAATGTCGACTGATCCGTAGGCGAGGACGAATTATAGTAATTTG  
TTCT---AATCCGAAACATAAACAGAGACAGGGA-----ATGGTT-----  
CGAGAGGAAGTACCAGTATCCACT-----CGGACGCTACAGTGGAAGTGTGTTGAATCA---AGAGCAGAC---  
AGCAAACGCCTT---  
TATTATGGTCGTTTTCGTTTTATCCCCACTTATGAAGGGTCAAGCCGATACAATCGGTATCGCGATGCGAAGGGCTTTACT  
TGGAGAACTAGAAGGAACATGTATTACGCGCGCAAAATCTGATAAGGTACCACATGAATATTCTACGGTAGTAGGTATTG  
AAGAATCAGTCCATGAAATTTAATGAATTTGAAAAAATGGTATTTAGAAGTGATCTGTACGGAACCTCTCGAC---  
GCATCTATCTGTGTCAGGGGCCCTAGACACGTAAGTCTCAAGACATCATCTCACCACCTTCTGTAGAAATAGTTGATAC  
TACACAGCATATAGCTGTCCTAACAGAACCGGTTGATTTGTGCATTGAATTAATAAATCGAGAGGGGTCGTGGATATTGTA  
CGAGAACCCAA---AATAACTATCAAGACGGA---AGCTATCCT-----  
ATAGATGCTGTATCCATGCCTGTTTCGAAATGCGAATCATAGTATTCATTCTTATGGGAATGGGAATGAG-----  
AAACAAGAGATA

Oenothera

GTGTAAGTAAAGCCTTACGTATGTCTGGTGGAGATCATATTCAGTACCGTAGTAGGTAAGGAGAA  
AGAGATATTACTTTAGGCTTTGTTGATTTACTACGTGATGATTTTATTGAAAAGACCGAAGCCGCGGATTTTATTTTAC  
TCAAGATTGGGTCTCTCTACCTGGTGTGTTGCTGTGGCTTCAGGGGGTATTACGCTGTGGCATATGCCTGCTCTGACCG  
AAATCTTTGGAGATGATTCGTAATAATTCGGTGGTGGAACTTTAGGACACCCTTGGGGAAATGCACCGGGTGTGTA  
GCGAATCGAGTAGCTCTAGAAGCATGCGTACAAGCCCGTAATGAGGGGCGTGATCTTGCTCGTGAAGGTAATGAAATTAT  
ACGGGAGGCTTGCAAATGGAGTCCGGAACCTAGCT---GCTGCTTGTGAA---GTATGG---AAAGAGATCAAATTTGAA-  
---TTCCTTGCAATGGATACTTTG-----  
ATGGCGATGCATTTATACAAAACCTTCTACCCCGAGCACACGCAATGGAGCCGTA-----GACAGT-----  
CAAGTGAATCCAATACAGAAA-----

AATTTGATCTATGGACAGCCTCGTTGTAGTAAAGGTCGTAATGCCAGAGGAATCATTACCGCAGGGCATAGAGGGGGAGG  
TCATAAGCGTCTATACCGTAAAATCGATTTTCGACGGAATGAAAGA---GACATATATGGTAGAATC-----  
--  
GTAAGCATAGAATACGACCCTAATCGAAATGCATCCATTTGTCTCATACTATGGGGATGGTGAGAAGAGATATATTTT  
ACATCCCAGAGGGGCCATAATTGGAGATACCATTGTTTCTGGT-----ACAGAGGTTTCTATAAAAATG-----  
-----GGAAATGCCCTACCTTTG-----  
ACCGAGATGCCCTTAGGCACGGCCCTACATAACATAGAAAACACACTTGGAAAGGGTGGACAATTAGCTAGAGCAGCGGG  
TGCTGTAGCGAAACTGATTGCAAAAGAGGGGAAATCGGCCACATTAATAATTACCTTCTGGGGAGGTCCGTTTGATATCCA  
ACAACCTGCTCAGCAACAGTCGGACAAGTGGGGAATGTTGGGGTGAACCAGAAAAGTTTGGGTAGAGCCGGATCGAAACGT  
TGGCTAGGTAAGCGTCTGTAGTAAGAGGGGTAGTTATGACCCCGTAGACCATCCCCATGGGGGTGGTGAAGGGAGACC  
CCCAATTGGTAGGAAAAACCCGCAACCCCTTGGGGTTCCTCCGGCACTTGGGAAGAAGAAGTAGAAAAAGGAATAAATATA  
GTGAGAATTTGATTCTTCGTCGCCGTCGTAAA-----  
ATGATTCAACCTCAAACCCGTTTGAATGTCGCGGATAACAGTGGGGCTCGAGAATTAATGTGTATTGCAATCATCGGAGC  
T---  
AGTAATCGTCGATATGCTCATATCGGTGACATTATTGTTGCTGTGATCAAGGAAGCATTACCAAGCACCTCCCTAGAAAG  
ATCAGAAGTGGTCAGAGCTGTAATTGTACGTACTTGTAAAGAACTTAAATGTGACGACGGTATCATAATACGATATGATG  
ACAATGCTGCTGTTGTCATTGATCAAGAAGGA---  
AATCCAAAAGGAACCCGAGTTTTTGGTGCGATTGCCACGAATTGAGAGAGTTAAGTTTTCACTAAAATAGTTTTATTAGC  
ACCTGAGGTATTA---ATGCTTAGT---  
CCCAAAAGAACCAGATTTTCGTAACAACATAGAGGAAGAATGAGAGGGATATCTTATCGCGGCAATCGTATTTGTTTCGG  
TAAATATGCTCTGCAGGCACCTTGAACCGGCGTGGATCACATCTAGACAAATAGAAGCAGGGCGTCGAGCAATGACGCGAA  
ATGTACGACGTGGTGGAAAAACATGGGTACGTATATTTCCAGACAAACCCGTTACGTTAAGAGCGGCCGAAACACGTATG  
GGTTCCGGTAAAGGAAACCCCGAATATTGGGTAGCTGTGCTCAAACCGGGTAGAATACTTTATGAAATGGGTGGAGTCGC  
AGAAAATATAGCCAGAAAGGCGATTTCTATAGCAGCCTCGAAAATGCCTATACGAACTCAATTCATTATTTTCAGGA----  
-----  
ATGACCAGAATTAGACGGGGATATATAGCTCGTAGACGTAGAACAAAAACGCGTTTTCTTTGCATCAAGCTGGCGGGGGGC  
TCGTGGAAACCTGACTCGAGCAATCATTCAACAGAGAATAAGAGCTTGGTTTTCTGCTCATCGAGATAGAACTAGACAAA  
AGAGAGATTTTCGTCGTTTGTGGATCACTCGAATAAATGCAGCAATTCGCGAGAAT-----  
GGGAGATCCTCTATTTATAGTAAATTAATACACAATCTGTACAAGAGGCAGTTGTTTTCTTAATCGTAAAATGCTTGCC--  
-----CAACTAGCTATATTAATAGGAATTGTCTTTATATGATTTCCAATCAGATCCTAAAA-----  
-----  
ATGAAAAAAAAG-----  
AAAACATACGGCGAAGTCTATGCTTTAGGGCAATAT---  
ATATCCAAGGCCGGTCCCAAAGCGCGAAGGGTATTGATCAGATTTCGTGGGCGGTCTACGAAGAAACCCCTTATGCTACT  
AGCACTTATGCCTTATCGAGCGTGTGATCCCATTTTAAAATTAGTGAATTCTGCGGCCGCAATGCTAGGCACAATATGT  
CTTTCAATGAAGCAACTTTAGTTATTAGTAAAGCAGAAGTCAACGAAGGCACTACTGTGAAAAAATTAACCAGCGAGCT  
CGAGGACGGAGTTATCCAATAAGAAGACCCACTTGCCATATAAGAATTGTATTGCAAGATACGTCTTTTCGATGAA-----  
-TTTGAAGAA-----GATTTCTTCTCCTTA-----  
AAAAAAGACGCG-----  
-----  
TGGGAAAAAAAATAAATGGATGGAATCAAATATGCAGTATTTACAGACAAAGGTGTTTCGGTTATTGGGG---  
AAAAATCAATATACTTCTAATGTGCAATCAGGATCAACTAGGACAGAAATAAAGCATTGGGTGCAACTCTTCTTTGGTGT  
CAAGGTACAAGCTATGAATAGTCATCGACTC-----CCGGGAAAG-----  
GGTAGAAGAATGGGACCTATTATGGGACATACAATGCATTACAGACGTATGATCATTACGCTTCAACCGGGTTATTCTAT  
TCCACCTCTTAGAAAAGAAAAGAACTTAA-----  
ATGGCAGTTCCAAAAAACGCACTTCTATATCAAAAAACGTTATTCGTAATACTATTTGGAAAAA---  
AAGGCATATTGGGCATCCTTGAAAGCTTTTTCGTTAGCGAAGTCT-----CTTTCTACTGGAAAT-----  
TCTAAAAGTTTTTTC-----TACTCGAAATTC-----  
-----  
ATGGCCAGG---GGTAAAGATGCC---CGTGTAACGGTTATCTTGGAAATGTACCAATTGTGTT-----  
CGAGGGGGTGTACT-----  
AAGGAATCAACGGGTATTTCCAGATATATTACTGAAAAGAATCGACACAATACGCCTGGTCAATTGGAATTGAAAAAATT  
CTGTCCCTATTGTTACAAACAGACGATTACGCGGGGAGATAAAGAAA-----  
ATGAAAATACGGGCATCCGTTTCGTAATAATTTGTACAAAATGTGACTGATCCGTAGGAGAGGACGAATTATAGTAATTTG  
TTCC---AATCCGAGACATAAAACAAAGACAAGGC-----ATGGTC-----  
CGAGAGAGAGTAAGAGTATCTACT-----CGGACACTCCAGTGGAAAGTGTGTGGAATCAC--AGAGTAGACA--  
CGTAAGCGTCTCT--

TATTATGGACGCTTTATTCTTTCCCCCTTATGAAAGGGCAGGCCGATACAATAGGCATTGCGATGCGAAGAGCTTTACT  
TGGGGAAATAGAAGGGACATGTATCACCCGCGCCCAATTTGAAAAAATACCCCATGAATATTCTACCATAGTAGGTATTC  
AAGAATCAGTACCTGAAATTTAATGAATTTGAAAGAAATTTGTGTTGAGAAGTAATTTGTATGGAACCTTGTAAAC---  
GCGTCTATTTGTGTCAAGGGTCCCGGGTGTGTAAGTCTCAAGACATCCTATTACCACCGTCTGTGGAAATCATTGATAA  
CACACAGCATATAGCTAGCCTAATGGAACCGATTCAATTTGTGTATTGGATTACAAATTGAGAGGAATCGAGGATATCATA  
TAAATCACCA---AATAACTTTCAAGACGGA---AGTTATCCT-----  
ATAGATGCTGTATTTATGCCTGTTTCCGAAATGCGAATCATAGTATTCTATTCTTATGGGAATCAAAATGAA-----  
AAACAAGAGATA

*Oryza*

GTGTATTAGCTAAAGCATTGCGTATGTCTGGGGGAGATCATATCCACGCTGGTACAGTAGTAGGTAAGTTAGAAGGGGAA  
CGCGAAATGACTTTAGGTTTTGTTGATTTATTGCGCGATGATTTTATTGAAAAAGATCGTGCTCGCGGTATCTTTTTCAC  
TCAGGACTGGGTATCCATGCCAGGTGTTATACCGGTGGCTTCAGGGGGTATTTCATGTTTGGCATATGCCAGCTCTGACCG  
AAATCTTTGGAGATGATTCTGTATTGCAATTTGGTGGAGGAACTTTAGGACATCCTTGGGGTAATGCACCTGGTGCAGCA  
GCTAATCGGGTGGCTTTAGAAGCCTGTGTACAAGCTCGTAACGAAGGGCGCGATCTTGCTCGTGAAGGTAATGAAATTAT  
CCGATCAGCTTGCAAATGGAGTCTGAACTAGCC---GCAGCTTGTGAA---ATATGG---AAAGCGATCAAATTCGAG-  
--TTCGAGCCGGTAGATAAACTAGATAGC-----  
ACGGCGAAACATTTATACAAAACACCTATCCCGAGCACACGCAAGGGAACCATA-----GATAGG-----  
CAAGTGAAATCCAATCCACGAAAT-----  
AATTTGATCCATGGACGGCACC GTTGTGGTAAAGGTCGTAATTCAGAGGAATCATTACCGCAAGGCATAGAGGGGGAGG  
TCATAAGCGCCTATACCGTAAAATCGATTTTCGACGGAATCAAAAA---GACATATCTGGTAGAATC-----  
--

GTAACCATAGAATACGACCCTAATCGAAATGCGTACATTTGTCTCATACTATGGGGATGGTGAAGGGATATATTTT  
ACATCCCAGAGGGGCTATAATTGGAGATACTATTGTTTCTGGT-----ACAAAAGTTTCTATATCAATG-----  
-----GGAAATGCCCTACCTTG-----

ACCGATATGCCCTTAGGCACGGCCATACATAACATAGAAATCACACGTGGAAGGGGTGGGCAATTAGCTAGAGCAGCAGG  
TGCTGTAGCGAAACTGATTGCAAAAAGAAGGTAATTCGGCCACTTTAAGATTACCATCTGGGGAGGTCCGTTTGGTATCCC  
AAAATGCTTAGCAACAGTCGGACAAGTGGGTAATGTTGGGGTGAACCAAAAAGTTTGGGTAGAGCCGGGTCTAAGTGT  
TGGCTAGGTAAACCCCCGATGTAAGAGGGGTAGTTATGAACCCTGTGGACCACCCCATGGGGGCGGTGAAGGGAAAGC  
CCCATTTGGTAGAAAAAACCCACAACCCCTTGGGGTTATCCTGCGCTTGAAGAAGAAGACTAGGAAAAGGAAAAAATATA  
GTGATAGTTTTATTCTTCGTCGCCGT---AAG-----

ATGATTCAACCTCAGACCCTTTTAAATGTAGCAGATAACAGTGGAGCTCGAAAATTGATGTGTATTTCGAGTCATAGGAGC  
TGCTAGTAATCAGCGATATGCTCGTATTGGTGTATGTTATTGTTGCTGTAATCAAAGACGCAGTGCCCCAAATGCCTCTAG  
AAAGATCCGAAGTAATTCGAGCTGTAATTGTACGTACATGTAAAGAGTTCAAATGCGAAGACGGTATAATAATACGCTAT  
GACGACAATGCAGCGTTATCATTGATCAAAAAGGA---  
AATCCAAAAGGAACTCGCGTTTTTGGCGCGATCGCCGAGGAATTGAGAGAATTGAATTTTACTAAAATAGTTTTATTAGC  
TCCTGAAGTATTA---ATGCTTAGT---

CCCAAAAAGAACAGATTTTCGTAACAACATAGAGGAAGAATGAAGGGAAAATCCTACCGAGGCAATTGTATTTGTTTTGG  
TAGATATGCTCTTCAAGCACTTGAACCCACTTGGATTACGGCGAGGCAGATAGAAGCAGGACGAAGAGCAATGACACGAT  
ATGCACGTGCTGGTGGAAAAATCTGGGTACGTATATTTCCCACAAAACCGGTTACAATAAGACCGACCGAAACACGTATG  
GGTTCGGGAAAGGGATCCCCGAATATTGGGTAGCCGTTGTTAAACCAGGTCGAATACTTTATGAAATGGGCGGAGTATC  
CGAAACTGTAGCTAGACGAGCTATTTCCATAGCTGCCAGCAAAATGCCCATACGAAGTCAATTTCTTCGGTTAGAAATA-  
-----

ATGACCAGAGTTCCGCGAGGATATATAGCTCGGAGACGACGGGCAAAAATGCGTTCATTTGCCTCAAACCTTTAGAGGGGC  
TCATTTAAGACTTAATCGAATGATTACTCAACAGGTAAGAAGAGCGTTTTGTTTCTCTCATCGAGATAGAGTCAGGCAAA  
AGAGGGATTTTCGGCGTTTTGTGGATCAGTCGGATAAACGCAGCAACGCGGATACAT-----  
AAAGTATTCGATAATTATAGTAAATTAATACACAATCTTTACAAGAAAGAATTGATTCTTAATCGTAAAATCCTTGCA--  
-----CAAGTAGCTGTATTAATTCAAATAATCTTTACACGATTTCCAATAAAAATAAAG-----  
-----

ATGACAAGTTTTCAAACCTGGTAAAGTATAACCCTAGGATAAAAAGAAGAAGAGTGGGCTAAGGAAACTCGCAAGAAAAGT  
ACCAACCGATCGTCTACTTAAAGTTTCAACGGGTTTTCAAAGCACAAAACGCATCCACATGTCCGTTTTCAAAGTACAAA  
GAGTCTGGATGAGATTCGTTGGCGTTACTACGAAGAAACTGTTATGATATTGAACCTCATGCCTTATCGAGCATCTTAT  
CCCATCTTAAAGTTGGTTTTATTTCGGCAGCAGCAAAATGCTACTCATTATAGGGATTTTCGACAAAGCAAATTTATTTCATCAC  
TAAAGCCGAAGTCAGTAGGAGTACTATTATGAATAAATTCAGACCTCGGGCTCGAGGACGTAGTTCTCCCATAAAAAAA  
CCATGTGTACATATAACAATTGTACTAAATATAGTAAAGAAATCGAAATAA-----  
-----  
-----

ATGGATGGAATCAAATACGCAGTATTTACAGAAAAAGTCTTCGTTTTATTGGGA---  
AAGAATCAATATACTTTTAAATGTCTGAATCGGGATTCACTAAGACAGAAATAAAGCATTGGGTGCAACTCTTCTTTGGTGT  
TAAGGTAGTAGCTGTGAATAGCCATCGACTA-----CCCGGAAAG-----  
GGTAGAAGAATGGGCCCTATTCTAGGACATACAATGCATTACAGACGTATGATCATTACCCTTCAACCGGGTTATTCTAT  
TCCACTTCTAGATAGAGAAAAAACTAA-----  
ATGGCAGTTCCAAAAAACGTACTIONTCGATGTCAAAAAAGCGTATTTCGTAAAAATCTTTGGAAGAAA---  
AAGACTTATTTTTCCATAGTACAATCTTATTCTTTAGCAAAATCAAGATCATTCTGGCGTCAGCGAGCATCCAAAACC  
AAAGGGTTTTTCT-----CGG-----  
-----  
ATGGCCAAG---GGGAAAGATGTT---AGAATCAGAGTTATTTTGCAATGTGTGAGTTGTGTT-----  
CGAAAAGGGCCAAT-----  
GAGGAGTCGGCAGGGATTTCTAGATATAGTACTCAAAGAATCGCCACAATACACCCGGACAATTAGAATTAAGAAAATT  
TTGTCTGTTATTGTCTGAAGCATACGATTTCATGCCGAAATAAAGAAA-----  
ATGAAAATAAGAGCTTCTGTTTCGTAAAATTTGTACAAAATGTGCGACTGATTTCGTAGGCGTGGACGAATTAGAGTCATTTG  
TTCC---AATCCGAAGCATAAAACAAAGACAGGGG-----ATGGTT-----  
CGAGAGGAGGTAGCAGGATCCACT-----CAAACACTACAGTGGAAAGTGTGTTGAATCA---AGAGTAGAT---  
AGTAAGCGTCTT---  
TATTATGGTCGTTTTATTCTGTCCCCGCTTAGAAAAGGTCAAGCGGATACCGTTGGTATTGCCTTGCGAAGAGCTTTACT  
TGGAGAAACAGAAGGAACATGTATCACACATGCAAAATTTGGGAGCGTGCCGCACGAATATTCTACAATAGCAGGTATTG  
AAGAATCGGTACAAGAAATTTTACTAAATTTGAAAGAAATTTGATTGAGAAGTAATCTCTATGGAGTTAGAACC---  
GCATCAATTTGCGTCAAAGGTCTTAGATACATAACTGCCCAAGATATTATCTTACCGCTTCCGTAGAAATCGTTGATAC  
GGCACAACCTATAGCTAACTTGACAGAACCCACGGATTTCCGTATTGAGTTACGGATCAAGAGAGATCGCGGATATCACA  
CGGAAGTCAGA---AAGAACACTCAAGATGGA---AGTTATCCT-----  
ATAGATGCTGTATCCATGCCTGTTTCGAAATGTGAATTATAGTATTTTTGCTTGTGGGAATGGAAATGCA-----  
AAATATGAGATA  
Panax  
GTGTACTAGCTAAAGCGTTACGTATGTCTGGTGGAGATCATATTTACTCCGGTACCGTAGTAGGTAAACTTGAAGGGGAA  
AGAGACATCACTTTGGGCTTTGTTGATTTACTGCGTGATGATTTTATTGAAAAAGATCGAAGTCGCGGTATTTATTTTAC  
CCAAGATTGGGTCTCTCTACCAGGTGTTCTGCCCGTGGCTTCGGGGGGTATTACGTTTTGGCATATGCCTGCTCTGACCG  
AGATCTTTGGGGATGATTCCGTACTACAGTTCGGTGGAGGAACCTTAGGACACCCTTGGGGAAATGCACCCGGTGCCGTA  
GCTAATCGAGTAGCTCTAGAAGCATGTGTACAAGCTCGTAATGAGGGACGTGATCTTGCTCGTGAAGGTAATGAAATTAT  
CCGCGAGGCTGCTAAATGGAGCCCTGAACTAGCT---GCTGCTTGTGAG---GTATGG---AAGGAGATCAAATTTGAA-  
--TTTGAAGCAGTGGATATTTTGGATGTTGTG-----  
ATGGCGATACATTTATACAAAACCTTCTACCCCGAGCACACGCAATCGAGCCGTA-----GACAGT-----  
CAAGTGAAATCCAATCCACGAAAT-----  
AATTTGATCTATGGACAGCATCATTGTGGTAAAGGTGCGTAATGCCAGAGGAATCATTACCGCAGGGCATAGAGGGGGAGG  
TCATAAGCGTCTATACCGTAAAATCGATTTTCGACGGAATGAAAA---GACATATATGGTAGAATC-----  
--  
GTAACCATAGAATACGACCCTAATCGAAATGCATACATTTGTCTCATACTATGGGGATGGTGAAGAGATATATTTT  
ACATCCCAGAGGGGCTATAATTGGAGATACCATTGTTTCTGGT-----ACAGAAGTTCCTATAAAAATG-----  
-----GGAAATGCCCTACCTTTG-----  
ACCGATATGCCCTTAGGCACGGCCATACATAACATAGAAATCACACGTGGAAAGGGTGGACAATTAGCTAGAGCAGCGGG  
TGCTGTAGCGAAACTGATTGCAAAAGAGGGGAAATCGGCCACATTAATAATTACCTTCTGGGGAGGTCCGTTTGATATCCA  
AAAATGCTCAGCAACGGTCGGACAAGTGGGGAATGTTGGGGTGAACCAGAAAAGTTTGGGTAGAGCCGGATCTAAGCGT  
TGGCTAGGTAAGCGTCTGTAGTAAGAGGAGTAGTTATGAACCCTGTAGACCATCCCCATGGGGGTGGTGAAGGGAGGGC  
CCCAATTTGGGAGAAAAAAACCCACAACCCCTTGGGGTTATCCTGCCTTGGGAGAAGAAGTAGAAAAAGGAATAAATATA  
GTGATAATTTGATTCTTCGTGCGCCGTAGTAAA-----  
ATGATTAACCTCAGACCCTTTTGAATGTAGCGGATAACAGCGGGGCTCGAGAATTGATGTGTATTGCAATCATAGGAGC  
T---  
AGCAATCGTCTGATATGCTCATATCGGTGACGTTATTGTTGCTGTGATCAAAGAAGCAGTGCCAAACATGCCCTTAGCAAG  
ATCAGAAGTGGTCAGAGCTGTAATTGTACGTACTTGTAAAGAACTCAAACGTGATAACGGTATGATAATACGATATGATG  
ACAATGCTGCGGTTGTCATCGATCAAGAAGGA---  
AACCCAAAGGGAACCTCGGGTTTTTGGTGAATTTGCCCGGGAATTGAGACAGTTAAATTTTACTAAAATAGTTTTATTAGC  
TCCGGAGGTATTA---ATGCTTAGT---  
CCCAAAAGAACCAGATTCGGTAAACAACATAGAGGAAGAATGAAGGGAATATCTTATCGAGGTAATCATATTTCTTTTCGG  
TAAATATGCTCTTCAGGCACCTTGAACCCGCTGGATCACATCTAGACAAATAGAAGCAGGTGACGAGCAATGACACGAA  
ATGCACGACGTGGTGGAAAAATATGGGTACGTATATTTCCAGACAAACCGGTTACAGTAAGACCCGCAGAAACACGTATG

GGTTCGGGGAAAGGATCCCCTGAATATTGGGTAGCTGTTGTTAAACCAGGTCGAATCCTTTATGAAATGGGTGGAGTAAC  
AGAAAATATAGCCAGAAAGGCTATTTCAATAGCATCGTCTAAAATGCCTATACGAACTCAATTCATTATTTTCGGCA----

-----  
ATGACCAGAATTAGACGGGGATATATAGCTCGGAGACGTAGAACAATAAATTCGTTTTATTTGCATCAAGCTTTTCGAGGGGC  
TCATTCAAGGCTTACTCGAACAATTACTCAACAGAAAATAAGAGCTTTGGTTTTCGTCTCATCGGGATAGGGATCGGCAAA  
AGAGAAATTTTCGTGCTTTGTGGATCACTCGAATAAACCGCAGTAATTCGTGAAGGG-----  
GGGGTATCCTATAGTTATAGTAGATTAATACATGATCTGTATAAGAAACAGTTACTTCTTAATCGTAAAATACTTGCA--

-----  
CAAATAGCTATATCAAATAAAAAATTGTCTTTATATGATTTCCAATGAGATCATAAAAAGAAGTAGATTGGAAAGAATCCAC  
CGGAATAATT-----ATGTTAAAG-----

-----AAGAGAAAAACAACAGTATATGCTTTAGGTCAATAT---  
TTATCTATGTCTGCTCATAAAGCGCGAAGAGTAATAGATCAAATTCGTGGACGTTCTTATGAAGAAACACTTATGATACT  
AGAAGTCAATGCTTATCGAGCATGTTATCCCATTTTTAAATTGGTTTTATTCTGCAGCAGCAAATGCTAGTTACAATATGG  
ATTCCAACGAATCAAATTTAGTTATTAGTAAAGCTGAAGTCAGCGAGGGTACTATCGTGAAGAAATTAACCTCGAGCT  
CGAGGACGTAGTTTTCCGATAAAAAGACCTACCTGCCATATAAGTATTGTAGTGAAAGATATATCCTTAGATGAATATAT  
AGAAGTAGACTTTCTAGAC-----CCTCTCAGATGGTCA-----  
AAAAAACTAAAA---TCA-----AAAAAAAAGTATACGGCTATGGCGTATCATAATATG-----

-----  
TATAGTAATGGGGGAGTATGGGACAAAAATAAATGGATGGAATCAAATATGCAGTATTTACAGACAAAAGTATTCGGTT  
ATTGGGG---

AAAAATCAATATACTTCTAATGTGCAATCAGGATCAACTAGGACAGAAATAAAGCATTGGGTGCAACTCTTCTTTGGTGT  
CAAGGTAATAGCTATGAATAGTCATCGACTT-----CCGGGAAG-----

GGTAGAAGAATGGGACCTATTATGGGACAGACAATGCATTACAGACGTATGATCATTACGCTTCAACCGGGTTATTCTAT  
TCCACCTCTTAGAAAGAAAAGAACTTAA-----

ATGGCAGTTCAAAAAACGTAATCTTCTATATCAAAAAAGCGTATTCGTAAAAATATTTGGAAAAGA---  
AAGGGATATTGGGCAGCCTTAAAAGCGTTGTCTATTAGGGAAATCT-----CTTTCTACTGGAAAT-----

TCAAAGGTTTTTTTT-----GTGCGACAA-----ACA--  
---AAT---AAGTCA-----

ATGGCCAAG---GGGAAGGATGTC---CGAATAACCGTTATTTTGAATGTACCAGTTGTGTT-----  
CGAAACGGTGTTAAT-----

AAGGTATCAACGGGTATTTCCAGATATATTACTCAAAAAGAACCGGCACAATACGCCTAATCGATTGGAATTGAGAAAATT  
CTGTCCATATTGTTACAAACATACGATTCATGGGGAGATAAAGAAA-----

ATGAAAATAAGAGCTTCTGTTTCGTAAAATTTGTGAAAAATGTGCGACTAATTCGTAGGCGGGGACGAATTATAGTAATTTG  
TTCC---AACCCAAGACATAAACAAAGACAGGGG-----ATGGTT-----

CAAGAGAAAGTAAGAGTATCTACT-----CGGACACTACAGTGGAAGTGTGTTGAAGCA---AGAGCGGAC---  
AGTAAGCGTCTT---

TATTATGGACGCTTTATTCTGTCTCCACTTATGAAAGGTCAAGCTGATACAATAGGCATTGCAATGCGAAGAGCTTTGCT  
TGGAGAAATAGAAGGAACATGTATCACACGTGCAAAATCTGAGAAAATACCACACGAATATTCTACCCTAGTGGGTATTC

AAGAATCAGTACATGAAATTTAATGAATTTGAAAGAAATTATATTGAAAAGTAATCTATATGGAACCTTGCAGC---  
GCGTCTATTTGTATTAGGGGCTCTGGATATGTAAGTCTCAAGATATCATCTCACCCTTATGTAGAAATCGTTGACAA

TACACAGCATATAGCTAGCTTGGCGGAACCAATTGATTTGTGATTGGATTACAAATAGAGAGGAATCGCGGATATCTTA  
TAAAAACGCCAAATAACAACCTTTCAAGATGGA---AGTTATCCT-----

ATAGATGCTGTATTTCATGCCTGTTTCGAAACGCGAATCATAGTATTCTTATGGGAATGGGAATGAG-----  
AAACAAGAGATA

Pelargonium

GTGTACTAGCAAAAGCCTTACGTATGTCTGGTGGAGATCATATTCCTCCGGTACCGTAGTAGGTAACCTTGAAGGCGAA  
AGAGACATCACCTTGGGCTTTGTTGATTTACTACGCGATGATTTTATTGAAAAGACCGAAGCCGCGGTATTTACTTCAC

TCAAGATTGGGTCTCTCTACCGGGCGTTTTGCCTGTGGCTTCTGGGGGATTACGTTTTGGCATATGCCTGCGCTGACCG  
AGATCTTTGGAGACGATTCCGTAATAAATCGGTGGGGAACTTTAGGACACCCTTGGGGAAATGCGCCGGGTGCCGTA

GCTAATCGAGTAGCCCTAGAAGCATGTGTACAAGCTCGTAATGAGGGGCGTGATCTTGCTCGTGAGGGTAATGAAATTAT  
CCGTAAGGCTTGAAGTGGAGTCGTGAACTGGCT---GCTGCTTGTGAA---GTATGG---AAGGAGATCAAATTTGAG-

--TTTGAAGCAATGGATACCTTGTA-----  
ATGGCGATACATTTATACAAAACCTTCTACCCCGAGCACACGCAAGAGAGCCGTA-----GACAGT-----

CAAGGGAAATCCAATCCACGAAAT-----  
CATTTGATCTATGGACAGCATCGTTGTGGTAAAGGTGCGTAATGCCAGAGGAATCATTACTGCAGGGCATAGAGGGGGAGG

TCATAAGCGTCTATACCGTCAAATCGATTTTCGACGGAACGAAAAC---AACATATACGGTAGAATC-----  
--

GTAACCATAGAATACGACCCTAATCGAAATGCATACATTTGTCTCATACACTATGGGGATGGTGAGAAGAGATATATTTT  
ACATCCCAGAGGGGCTAGAATTGGAGATACCATTGTTTCGGGT-----ACAGAAGTTCCTATCAAAATG-----  
-----GGAAATGCCCTACCTTTG-----  
ACCAATATACCCTTAGGCACGGCCATACATAACATAGAAATCACACTTGGAAAGGGTGGACAATTAGCTAGAGCAGCGGG  
TGCTGTAGCGAAACTGATTTCAAAAGAGGGGAAATCGGCCGCAGTCAAATTACCTTCTGGAGAGGTACGTTTGATATCCC  
AAACTGCTCAGCAACAGTCCGACAAGTGGGGAATGTTGGAGTGAACCGGAAAAGTTTGGGTAGAGCCGGATCTAAACGT  
TGGCTAGGGAAGCGTCTGTAGTAAGAGGAGTAGCTATGAACCCTGTAGACCACCCCATGGGGTGGTGAAGGGAAAGC  
CCCAATTGGTAGAAAAAACCCGCAACCCCATGGGGCCGTCTGCACTCGGAATCAGAACTAGAAAAAGGAAAAATATA  
ATGATAATTTGATTCTTCGTCGCCGTAGTAAATAG-----  
ATGATTCAATCTCAGACCCTTTTGAATGTAGCGGACAACAGCGGTGCCCGGAAATTGATGTGTATTTCGAATCGTAGGAGC  
T---  
AGCAATCAACGATATGCTCATATTGGCGACGTTATTGTTGCTGTAATTAAGGAAGCAAAGCCAACCTTCGGCTCTAAAACG  
ATCAGAAGTGATCAAAGCTGTAATTGTACGTACTTGTAAAGAATTCAAATGTGATGATGGTATGATAATAAGATATGATG  
ACAATGCTGCAGTTGTCATTAATAAAGACAGA---  
AATCCAGTAGGAACTCGCATTTTTGGTGCATCCCCCTAGAATTGCATCAA---  
AATTTTCGACAAAATAGTTTCATTAGCGCGTGAAGTAATATAAATGTTGAGT---  
CCAAAAAAACCAAATTCGGTAAAGAACATCGAGGAAGAATGAAAGGAAGATCTTCTAGAGGCAGTCGTATTTCTTTTCGG  
TAAATATGCTCTTCAAGCACTTGAACCCGCTTGGCTCACCTCTCGACAAATAGAAGCAGGGCGGCGAGCAATGACACGAA  
ATGTACGCCGCGGTGGAAAAATATGGGTGCGTATTTTTCCAGACAAACCCGTTACAGTCAAACCTACACAAACGCGTATG  
GGTTCCGGTAAAGGATCTCCCGAATATTGGGTAGCTGTCGTTAAACCGGGTAGAATACTTTATGAAATGGGCGGAGTAGC  
GGAAAAATATAGCTAGAAAGGCTATTGAAATAGCTGCATCAAAAATGCCTATACGGACTCAATTCATTATTTCGAAATAG-  
-----  
ATGACCAGAATTAAGCGAGGCTCTATAGCTCGGAGACGTAGAGCAAAAACACGTTTATTTGCATCAGGCGCTCGAGGAGC  
TCATTCAAGGCTTACTCGACTTATTGCTCAACAGACAATAAGAGCTTTGGCTTCGGCTCATCGTGATAGAGATAAGAAAA  
AGAGGGATTTTCGTCGTTTGTGGATCACTCGGATAAATGGAGTAATTCGCCAAAAT-----  
GTATTATCTTATAGTTATAGTCAATTAATCACTAATCTGAAAAAGGAACAGTTGCTTCTTAATCGTAAAATGCTTGCA--  
-----  
CAAATAGCTATCTCAAATAGGAATTGTCTTTCCATAATTTACAGTGCATTATAATCCTAGAAAACAAAAGAGGAGGGCCA  
AAAATGA-----  
ATGATAAAAAAAGAATAAG-----  
AAGCGATATACAGAAGTATCGGCTTTAGGTAAATAT---  
ATTCTATGTCTACTCACAAAGCGAGAAGAGTGATTGATCAGATTCGTGGACGTTCCCTACGAAGAAACACTGATGATACT  
AGAACTCATGCCTTATCGAGCATGTTATCCAATTTTAAAATTAATTTCTTCCGCGAGCAGCAAACGGTATTACAAATATGA  
ATTTTCGACGAAACAAGTTTAATCATTAGTAAAGCCGAAGTCAATGAGGGGCCTACTGCGAAAAAATTCAAACCTCGAGCT  
AAGGGACAGAGTTATCCGATAAAAAGATCCACTTGTATATCACTATCGTATTGAGGGATATATCATTAAACGAAAAATA  
TGAAGAATATATCAGAAAACCATGGGCCCTCTTAGAGAAATCAAACGAAACAGAAATAAGAAAACGGAATTGA-----  
-----  
ATGGATGGAATCAAATATGCAGTAGTTACAGACAAAAGTCTTCGGTTAGTGTCC---  
AAAAATCAATATACTTTAATGTGCAATCAGGATCAACTAGGACAGAAATCAAGTCTTGGGTGCAACTCTTCTTTGGTGT  
CAAGGTAATAGCTATGAATAGTCATCGACTC-----CCGGGAAAG-----CGTAGAAGAATGGGA-----  
CATACAATGCATTACAGACGTATGATTATTACGCTTCAACCGGGTTATTCTATTCCATCTCTTATAAATTTAATAATTTA  
A-----ATGACAGTTCCCAAAAACGCTCTTTCTAGTTCAAAAAGCGAATTCGGAAAAATATCTGGAAAGGA-  
--AAAGGGCATTGGGCGGCGTTGAAAGCTTTGTCAATTAGGTAAATCC-----CTTTCTACCGGGAAT-----  
TCAAAAAGTTTTTTTCGTTTTTTTCTATGCCAACTCGTTTTTTTTCTATGCCAACGGATAATAAGAAA-----ACA--  
----AAA---AAATCCTAA-----  
ATGGCTAAG---GGTAAAGATAAT---AGAGGAAAGGTTACTTTGGAATGTACCGGCTGTGTT-----  
CAAAATCGTGTGAATAATAAAAAAAAAAAGAAATCCGCGAGGCATTTACAGATATCTGACTCAAAAGAATCCAAAAATAC  
GCCTAGTCCATTGGAATTGAGAAAATCTGTCCCTATTGTAACAAACATACTATTACGGGGGAGATTAAGGAGTAG----  
--  
ATGAAAATAAGGGCCTCCGTTTCGTAAAATTTGTACAAAGTGTGAGTTGATCCGTAGGAAAGGGCGAATTAGAGTCATTTG  
TTCC---AATCCACGACATAAACAAGACAACGATAA-----  
-----  
-----  
-----  
-----

Phalaenopsis

GTGTACTAGCTAAAGCATTACGTATGTCTGGCGGAGATCATATTCACGCTGGTACAGTAGTGGGTAAACTGGAGGGGGAA  
CGTGAGATGACTTTGGGTTTTGTTGATTTGTTTACGTGATGATTATATTGAAAAAGATCGAAGTCGTGGTATTTTTTTTCAC  
TCAAGACTGGGTCTCTATGCCAGGTGTTATACCCGTGGCTTCAGGGGGTATTTCATGTTTGGCATATGCCTGCCCTAACCG  
AAATCTTTGGAGATGATTCCGTACTACAGTTTGGTGGAGGAACTTTAGGGCACCCCTTGGGGAAATGCACCCGGTGCAGTA  
GCTAATCGGGTAGCTTTAGAAGCATGTGTACAAGCTCGTAATGAGGGACGTGATCTTGCTCGTGAAGGTAATGATATTAT  
TCGTGAAGCTAGCAAATGGAGCCCTGAGCTAGCC---GCTGCTTGTGAA---GTCTGG---AAAGAGATCACATTTCGAT-  
--TTCGACCCAGTGGATAAGCCAGATATAGAGGCCAAAA-----  
ACGGCAATACATTTATACAAAACCTTCTACCTCGAGCACACGCAATGGAGCCGTA-----GACAGT-----  
CAAGTGAAATCCAATCCACGAAAT-----  
AATTTGATCTATGGACAGCATCGTTGTGGTAAAGGTCGTAATGCCAGAGGGATCATTACCGCAGGGCATAGAGGGGGAGG  
TCATAAGCGTCTATACCGTAAATCGACTTTTCGACGGAATGAAAA---GAGATATCTGGTAGAATC-----  
--  
GTAACCATAGAATATGACCCTAATCGAAATGCATACATTTGTCTCATACTATGGGGATGGTGAAGAAGAGATATATTTT  
ACATCCCAGAGGGGCTATAATTGGAGATACCATTGTTTCTGGT-----ACAGAAGTTCCTATATCAATG-----  
-----GGAAATGCCCTACCTTTG-----  
ACCGATATGCCCTTAGGCACGGCCATACATAACATAGAAATCACACTTGGAAAAGGTGGACAATTAGCTAGAGCAGCAGG  
CGCTGTAGCGAAACTGATTGCAAAAGAGGGTAAATCGGCCACATTAAGATTACCATCTGGGGAGGTCCGTTTGATATCCA  
AAAAGTCTTAGCAACAGTCGGACAAGTGGGTAATGTTGGGGTGAACCAAAAAGTTTGGGTAGAGCCGGATCTAAGTGT  
TGGCTAGGTAAGCGTCTGTAGTAAGAGGAGTAGTTATGAACCCTGTAGACCATCCCCATGGGGGCGGTGAAGGGAGAGC  
CCCAATTGGTAGAAAAAACCCACAACCCTTGGGGTTATCCTGCGCTTGGGAAGAAGAAGCAGGAAAAGGAACAAATATA  
GTGATAGTTTATTCTTCGTCGCCGT---AAA-----  
ATGATTCAACCTCAGACCCTTTTGAATGTAGCGGATAACAGTGGAGCTCAAAAATTAATGTGTATTGGAATCATAGGAAC  
T---  
GGTAATCACCGATATGCTCATCTTGGCGATGTTATTGTTGCTGTAATCAAAGAAGCAGTGCCCAACATGCCTCTAGAAAG  
ATCAGAAATAATTAGAGCTGTGATTGTACGCACATGTAAAGAAGTCAAACGTGACAACGGCATGATAATACGATATGATG  
ACAATGCAGCGTTTATCATTGATCAAGAAGGA---  
AATCCAAAAGGAACTCGAATTTTTGGTGAATTTGCTCGAGAATTGCGACAGTTGAATTTTACTAAAATCGTTTTATTAGC  
ACCCGAAGTCTTA---ATGCTCAGT---  
CCTAAAAGAACCAGATTTTCGTAAACAACATAGAGGTAGAATGAAGGGAATATCTTGCCGAGGCAATCATATTTGTTTTGG  
CAGATACGCTCTTCAGGCACCTGAACTGCTTGGATCACAGCTAGACAAATAGAAGCAGGACGAAGAGCAATGACACGAT  
ATGCGCGTCTGGTGGAAAGATATGGGTACGTATCTTTCCCGACAAACCTGTTACTGTAAGACCTACAGAAACACGTATG  
GGTTCCGGCAAAGGATCCCCCGAATATTGGGTATCCGTTGTTAAACCGGGCCGAATAATTTATGAAATGAGTGGAGTATC  
TGAAGCTGTAGCCAAAGCTGCTATGGAAATAGCAGCATGCAAAATGCCTATACGAACTCAATTTGTTATTTTCAGGA----  
-----  
ATGACCAGAGTTAAACGAGGATATACAGCTCGGAGACGTCGAAAAAAGATTTCGTTTATTTGCATCAACCTTTATAGGGGC  
TCATTCAAGACTGACTCGAACGACTACTCAACAAAGAATGAGAGCTTTGATTTCTCTCATCGAGATAGGAGCAGGAAAA  
AGAGAGATTTTCGTCGTTTGTGGATCACTCGAATAAATGCGGTAACCTCGTGAGGAT-----  
AGGCTATTCTATAGTTATAGCCTCTTCATCCACAATCTGTACAAAAGACAATTGCTTCTGAATCGTAAAATACTTGCG--  
-----CAAATAGCCCTATCAAATAAGAATTGTTTTGATATTATTTCAAATAAAATTATCAAT-----  
-----  
ATGATAAAG-----  
AACGAAAATAGAGAAGCAAAAGTTTTAGCTCAAAAT---  
ATATGTATGTCTGTTTTCAAAGCACGAAGAGTAATTGATCAGATTTCGTGGACGTTCTTATGAGGAAGCACTCATGATACT  
AGAATAATGCCTTATAGGGCATCTTATCCAATCTTAAAATTAGTTTATTCTGCAGCAGCAAAATGCTAGTCATAATATGG  
GTTTGAATGAAGTTGACTTATTTATTAGTAAAGCTGAAGTCAATAGAGGCACTATTATGAAAAAGTTAAAACCCCGGGCT  
CGAGGACGTAGTTATCTGATAAAAAAACCACTTGTTCATATAAAGATTTTTTTTAAAAGAAAAATATAAGGTTTATAG-----  
-----  
ATGGATGGAATCAAATATGCAGTATTTACAGAAAAAGTATTCCGTTATTGGGG---  
AACAAATCAATATACTTCTAATGTGCAATCAGGATCAACTAGGACAGAAATAAAGCATTGGGTGCAACTCTTCTTTGGTGT  
CAAGGTAATAGCTATGAATAGTCATCGACTC-----CCGGGAAAG-----  
GGTAGAAGGATGGGACCTATTATGGGACATACAATGCATTACAGACGTATGATCATTACGCTTCAACCGGGTTATTCTAT



TCCACCTCTTATAGAGAAAAGAACTTAA-----  
ATGGCAGTTCCAAAAAACGTACTTCTATGTCAAAAAAGCATATTCGTAGAAATCTTTGGAAAAA---  
AAAGGATCTTTAGCGGCAGTCAAAGCTTTTTCTTTAGCTCAATCT-----ATTTCCACCGGACAA-----  
TCAAAAAGTTTTCTTT-----GTTGCACAA-----  
----AAA---AAAGTCTTGGAAAAATCT-----  
ATGGCCAAG---GGTAAAGATATT---AGAATTATAGTGATTTTGGAAATGTACCTGTTGTGTT-----  
CGAAAGGGTGTCAAT-----  
AAAGAATTGCTGGGCATTTCTAGATATATTACTCAAAGAATCGACACAATACACCCAATCGACTAGAATTTAGAAAATT  
TTGTGCTATTGTCAAAGTATACGATTTCATGGGGAAATAAAGAAA-----  
ATGAAGATAAGGGCTTCTGTTTCGTAAAATTTGTGAAAAATGTGCTTGATTTCGTAGGCAGGGGCGAATTATAGTTATTTG  
TTCC---AATCCGAGACATAAACAGAGACAGGGG-----ATGGTT-----  
CGAGAAGACGTAGTAGGATCCACT-----CGAACACTACAGTGGAATGTGTTGAATCA---AGAGTAGAC---  
AGCAAGCGTCTT---  
TATTATGGTCGTTTTCGTTCTGTCCCCGCTTATGAAAGGTCAAGCCGATACCATAGGTATTGCCATACGAAGGGCTTTACT  
TGGAGAAATAGAAGGAACATGTATCACACGTGCAACATCTGAAAATGTGCTGCATGAATATTCTACGATAGCAGGTATTG  
AAGAATCAGTACATGAGATTTTACTCAATTTGAAAGATATTGTATTGAGAAGTAATCTTTATGGAGTTAGGAAC---  
GCATCCATTTGCGTCAGGGGTCCCAAATACATAACAGCTCAAGATATCATCTCACCACCTTCTGTAGAAATAGTTGACAC  
GACACAGCATATAGCTAACCTGACAGAACCAATTAATTTGTGTATTGAATTACAAATTAAGAGAGATCGCGGATATCGTA  
TGAAATCCACA---AATGACTCTCACGATGGA---AGTTATCT-----  
ATAGATATTGTATCTATGCCTGTTTCGAAATGCGAATCATAGTATTTCATTCTTATGGGAATGGGAATGAA-----  
AAACAAGAGATA  
Pinus  
GGGTACTGGCTAAAGCATTGCGTATGTCCGGTGGAGATCATATTCACGCCGGTACTGTAGTAGGTAACTTGAAGGTGAA  
CGAGACGTAACCTTTAGGGTTTTGTTGATCTACTGCGTGATGATTTTATCGAAAAAGATCGAAGTCGTGGTATTTACTTCAC  
TCAAGATTGGGTATCTATGCCAGGTGTTCTGCCCGTAGCTTCAGGAGGTATTACGTTTTGGCATATGCCTGCTCTGACCG  
AGATCTTTGGGGATGATTCCGTACTACAGTTTGGTGGGGGAACTTTGGGACATCCTTGGGGAAATGCACCTGGTGCAGTA  
GCTAATCGGGTTGCTCTAGAAGCTTGTGTACAAGCTCGTAATGAAGGACGTGATCTTGCTCGTGAAGGTAATGAAGTGAT  
CCGTGAAGCTTGTAATGGAGTCCCTGAACCTAGCT---GCTGCTTGTGAA---ATATGG---AAGGAGATCAAATTTGAA-  
---TTTGATGTGATTGATCGCTTG-----  
ATGGCCATCCGTTTCATATAGAATTTTAACTCCGGATACACGCAATAGATCTGTA---TCAGGTTTCGATGGA-----  
AGAGTGCAGTTGGACCCGCAGAAG-----  
AAATTGACCTCTGGACAACATCATTGTGGGAAAGGTGCGTAATGGAAGAGGAATTATTACCGCAAGACACAGGGGAGGGGG  
TCACAAGCGTCTGTATCGTCAAATTTGATTTTTCGACGGAATAAGGAA---CACATATCAGGAGAAATT-----  
--  
GTAACCATAGAATACGACCCTAATAGAAGTGCATACATTTGCAAGGTGCATTACAAGAATGGCGATAAGATGTATATTCT  
GCATCCCAGAGGGGTGATGATTGGAGATACTATTCTTTCTGGT-----CCAAAAGCTCCTATATCAATA-----  
-----GGAAATGCCCTACCTCTG-----  
ACCAATATGCCCTTAGGCACGGCTATACACAACATAGAAATAACACTTGGAAAGGGTGGACAATTGGCTAGAGCGGCAGG  
TGCTGTAGCAGAACTGATCGCAAAAGAAGATCGATCGGCCACATTAAGATTACCATCTGGAGAAGTTCGTTTAATATCTG  
AGAAGTCTCAGCCACAATTGGACAAGTGGGTAATATCACTGCAAAACAATAGAAGTTTCGGTAAAGCCGGAGCTAAACGT  
TGGTTGGGTAAGCGTTCTGAGGTAAGAGGAGTAGCTATGAACCCTGTAGACCATCCTCATGGAGGTGGGGAAAGGAAGAAC  
CCCAATTGGCAGGAAAAACCTGTGACCCCTGGGGCTATAGTGCCTTGGAAAGAAAAGTTCGGAAGAGAAATAGATACA  
GTGATGCTTCAATCCTTCGTGACGCT---GAG-----  
ATGATTCACTCAAACCTATTTGAATATAGCGGATAACAGTGGAGCCCCGAAAAATAATGTGTATTTCGAGTTCTAGGAGC  
A---  
AGTAATCGTAAATGCGCTCATATAGGTGATGTTATCATTGCTATAATTAAGAAGCAGTACCTAACATGCCCTTGAAAA  
ATCGGAAGTAGTTAGAGCCGTAGTTATACGCACCTGTAAAGAATTTGAACGTGACAATGGAATGATGATACGATCTGATG  
ACAATGCAGCCGTTGTCATTGATCAGGAAGGA---  
AATCCAAAAGGAACTCGAGTTTTTGGTCCGGTTGCTCAGGAATTGAGACAATTGAATTTACGAAAATAGTTTTATTGGC  
TCCCGAAGTATTA---ATGCTTAGT---  
CCAAAAGAACAATAATTTTCGTAAACAACATAGGGGAAGAATGAAAGGAGTATCTTACCGCGGCAATCGCATTGTTTCGG  
TAGATTGCTCTTCAAGCACTTGAACCCGCTTGGATCACATCTGGGCAGATAGAAGCCGGACGAAGAACGATTAATCGTT  
ATGCCCGTCTGGCGGAAAAATATGGGTACGTATATTTCCCGACAAACCTATTACAATGAGACCTGCAGAAACACGTATG  
GGTTCCGGGAAAGGATCTCCCGAATATTGGGTATCTGTGATCAGACCAGGTGCAATACTTTATGAAATGGGCGGAGTATC  
CGAAACCGTCTGCTAGAGCAGCTGCTAGAATAGCTGCATACAAAATGCCTATACGTACTCAATTTGTTACTACT-----  
-----  
ATGACCAGAGTGAAACGTGGATATATAGCTCGAAAACGTGCGAAAAAATCTTGCATTTGTATCAGGCTCTCGAGGGGC

CCATTTCGAAACTTTTTTCGAACTGCTAACCAACGGAAAGCTAGAGCCTTAGTTTTCCGCCACCGAGATAGAGGTAAACGCA  
AGAGAGATCTTCGTCGTTTTGTGGATTACTCGGATCAATGCAGCAGCTCGTGCCAAT-----  
GGGGTTTTCTTATAAT-----AGATTCATCCAATATTTGTACAAGAGGCAGTTGCTTCCAAATCGTAAAACACTTGCA--  
-----CAAATAGCTGTATTAGATAGTAATTGCTTTTTCCACCATCTTTAACAACCTTATCGTAT-----  
-----  
ATGGAGTCAATGGGAAATAAT-----  
AGTCCAGGTCCAGAGATACGAGCTTTGGCGAGAAAT---  
ATACGTATGTCTGCTCATAAAGCGCGTAGAGTAATTAATCAAATTCGTGGTCGTTTCATATGGACAAGCACTTATGATATT  
GGAACCTGATGCCTTATGGGGCCTGTTATCCCATATCACAATTAATTCATTCTGCGGCGGCGAATGCAAATCACAATATGG  
GTTTGAACAAAGCCAATTTACTCGTTGGTAGAGTCGAAGTGAATGAGGGTGCTGTTTTTAAAGGATTCAACCTAGAGCT  
CAGGGACGCGGTTATCCAATACAGAAACCCACTTGTTCATATAACTATTGTATCGGAGGAAATCTCCAGATCGAATGATCC  
GATTATGTCAATAGAATCCCGAAAAAAGGATATGTATGGCGCAGAAAAATA-----  
-----  
ATGGATGAAGTGAAATATCCAGTACTTACGGAGAAAAGTATTCGTCTATTGGAA---  
AGGAACCAATATACTTTTAAACGTCGATTTCGCAATCGAACAAAACAAAGATTAATAAATTGGATTGAAAATTTCTTCGATGT  
TAAAGTAATAGCTATGAACAGCTATCGCCTC-----CCTGAAAA-----  
GGAGGAAAGAGAGTGTCAATGATAGGACATCCAATACGTTGTAAACGTGTGATTATTACACTTAGAACCGGTGATTCTAT  
TCCACTCTTTTCAGAACAATA-----  
ATGGCAGTTCCAAAAAGCGTACTTCTAGATCAAAAAAAAAAATTCGTAAAAATGTTTCGGAAGGGA---  
AAAGCATATCGGGCCGCAATAAAAGCTTTTTCTTTAGCTAAATCT-----ATCTCCACCGGTCAT-----  
TCGAAAAGTTTTTAT-----  
TGCATAGTCAATGATGATTCCTCTGGATCATCCGAATCAAATGACAGCATTGATTGGATGACCCG-----  
-----ATGGCCAAG---AGCGGAGATATA---  
AGAGTAACAATTACTTTGGAGTGCCTAGTTGTACC-----CAAGATAGTGTATT-----  
AAAAGATTCCCGGGGATTTCTAGATATACGACTCGGAAAAATCGACGCAATACACCTATTTCGATTGGAATCAAATAAATT  
TTGTCCCTATTGTTACAAGCATAACCATTTCATGGAGAGATAAAAAAAGAGAT---  
ATGAAAATTCGTGCTTCTATTTCGTAGAATTTGTGGAAAATGTCGACCAATTCGTAGACGGAAACGAGTTATGATAATTTG  
TTCT---AATCCGAGACATAAGCAAAAACAGGGG-----ATGATT-----  
CGAGATGAAATCTCAGTCTCTATT-----CAGACACTACGATGGAATGCATCGAATCC---AGAGCATA---  
AGTAAGCGTCTT---  
CATTATGGCCGTTTTGCTCTATCCCCGCTCCACAAAGGTCGAGCCGATACAATAGGCATCGCAATGCGAAGAGCTTTACT  
TGGAGAAGTAGAAGGAACATGTATCACACGTGTAAAATTAGAGAACATAAAACATGAATATTCCGCGATAATAGGTATTG  
AAGAATCAGTACATGACATTTTGTGATGAATCTAAAAGAAATTGTATTTAGAAGTGACTCGTACGGAATCCGAGAA---  
GCTTCTATTTTATATTGTTGGACCCAGAAATGTAAGTCAAGATATCATATTACCCCTTCTGTGAAAATAATTGATAC  
TACACAACATATAGCTAGACTTACTAAATCAATTACTTCTGATATCAGATTACAAATTGAAAAAATCGCGGATATATTA  
TACATAGTCCA---AATAATTATCAGGACGGA---ATTTTTCT-----  
ATAGATGCTGTTTTTATGCCTGTTTCGCGATGCGAATTATAGTATTCATTCTATGGGAGCGGAAATGAA-----  
ATACGAGAAGTC  
Piper  
GTGTAAGTACAAAAGCATTACGTATGTCTGGTGGAGACCATGTTCACTCAGGTACGGTAGTAGGTAAACTAGAAGGGGAG  
CGGGATATCACTCTGGGTTTTGTTGATTTGCTACGTGATGATTTTATTGAAAAGATCGAAGTCGCGGTATTTATTTTAC  
TCAAGATTGGGTCTCTATGCCGGGCGTTTTGCCAGTAGCTTCAGGGGGTATTCACGTTTGGCATATGCCTGCTCTGACCG  
AGATCTTTGGGGATGATTCCGTAACAGTTCGTTGGTGGAGGAACTTTAGGACACCCTTGGGGAAATGCACCTGGCGCGGTA  
GCGAATCGTGTGGCTTTAGAAGCGTGTGTACAAGCTCGTAATGAAGGACGTGATCTTGCTCGTGAGGGTAATGAAATTAT  
TCGTGAAGCTGCTAAATGGAGCCCAAGACTAGCG---GCTGCTTGTGAA---GTATGG---AAAGAAATTAATTCGAA-  
---TTCGCCGCAATGGATACCTTG-----  
ACGGCGATCAATTTATACAAAACCTTCTATCCCGAGCACACGCAAAGGAGCCGTA-----GACAGT-----  
CAAGTGAAATCCAATCCACGAAAT-----  
AATTTGATCTATGGACAGCATCGTTGTGGTAAAGGTCGTAATGCCAGAGGAATCATTACCGCAGGGCATAGAGGGGGAGG  
TCATAAGCGTCTATACCGTAAATCGATTTTCGACGGAATGACAAA---GACATATCTGGTAGAATC-----  
---  
GTAACCATAGAATACGACCCTAATCGAAATGCATACATTTGTCTCATACTATGGGGATGGTGAAGAGATATATTTT  
ACATCCCAGAGGGGCTATAATTGGAGATACCATTGTTTCTGGT-----ACAGAAGTTCCTATATCAATG-----  
-----GGAAATGCCCTACCTTTG-----  
ACCGATATGCCCTTAGGCACGGCCATACATAACATAGAAATCACACTTGAAGGGGTGGACAATTAGCTAGAGCTGCGGG  
GGCTGTATCGAAACTGATTGCAAAAGAGGGTAAATCAGCTACATTAAGATTACCATCTGGGGAGGTCCGTTTGTATATCCA

AAAAC TGCTCAGCAACAGTCGGACAAGTGGGTAATGTTGAGGTGAACCAGAAAAGTTTGGGTAGAGCCGGATCTAAGTGT  
TGGCTAGGTAAGCGTCTCTGTAGTAAGAGGAGTAGTTATGAACCCTGTAGACCATCCCCATGGGGGTGGGGAAGGAAGGGC  
CCCAATTGGTAGAAAAAACCCGCAACCCCTGGGGTTATCCTGCGCTTGGAAGAAGAAGTAGGAAAAGGAATAAATATA  
GTGATCGTTTTATTCTTCGCCGCCGT---AAA-----  
ATGATTCAAACCTAAACCTATTTGAATGTAGCAGACAACAGCGGAGCTCGAGAATTGATGTGTATTCTGAATCTTAGGAGC  
T---  
AGTAATCGGCGATATGCTAATATTGGTGATATTATTGTTGCTGTAATCAAAGAAGCGGTGCCAAATATGCCTCTAGAAAG  
ATCCGAAGTAATTCGGGCTGTGATTGTACGTACATGTAAAGAACTTAAACGTGACAACGGTATGATAATACGATATGATG  
ACAATGCAGCAGTTGTCATTGATCAAGAAGGA---  
AATCCAAAAGGAACCCGAGTTTTTGGAGCGATCGCTCGGGAATTGAGACAATTGAATTTTACTAAGATAGTTTTATTAGC  
TCCCGAGGTATTA---  
ATGCTTAGTAACCCAAAAAGAACCAGATTCCGTAACAACATAGAGGAAGGATGAAGGGAATATCTTATCGGGGCAATCG  
TATTTGTTTCGGTAGATACGCTCTTCAAGCACTTGAACCCGCTTGATTACATCTAGACAAATAGAAGCAGGCCGACGGG  
CTATGGCACGGTATGCACGTGCGGGGGAAAAATATGGGTACGTATATTTCCCGATAAGCCCGTTACAGTAAGACCTGCG  
GAAACCCGTATGGGTTTACGGTAAAGGATCCCCTGAATATTGGGTATCTGTGCTTAAACCGGGCCGAATACTTTATGAGAT  
CGGGGGAATATCAGAACTGTAGCTAGAGCCGCGATTTCCATAGCTGCGTCAAAAATGCCTATACGAACTCAATTCGTTA  
TTGCAGGA-----  
ATGACCAGAGTTAGACGAGGATATATAGCTCGCAGGCGCCGAACAAAAATTCGTTTTATTTGCATCAACTTTTCGAGGGGC  
TCATTCAGACTTACTCGAACTATTACGCAGCAGAAAATGAGAGCTTTGGTTTTCTGCTCATCGGGATAGAGGCCGGAAAA  
AGAGGGATTTTCGTCGTTTGTGGATCACTCGGATAAATGCTGTAATCCGGGGGTCG-----  
GGGGTATCCTATAGTTATAGTCGATTAATACACGATTTGTACAAGAGACAATTGCTGCTAAATCGTAAAATACTTGCG--  
-----  
CAAATAGCTATATCAAATAGGAATTGTTTTTACATGATTTCTAATCAGATCATCAAATCGGGAGAATGTGAAGAATTTAA  
CGGAATTATT-----  
ATGTCAAGTTGGAGAAAGGCAAAGAAGAGCGAGCAAAAGCATAGATTAAGAGA-----  
ATTGCGGAACTCGAGTACAAGCTTTTCGCGCGAGAT---  
GTACGCATTTACAGCGACAAGGCACGAAGAGTCATTGATCAGATTCGTGGACGTTCTTATGTGGAAACACTTACACTACT  
CGAGCTCATGCCCTACCGAGCATCTTATCCCATTTTAAATTGCTTTATTCGCGCAGCAGCAAGCGCTAGTCACAATCTGG  
GTTTTCAAAGAAGCTGACTCATACTTAGTAAAGCGGAAGTTAATGAGGGTGCTGTTTTGAAAAGGTTAAAGCCTCGGGCT  
CGAGGGCGTAGTTATCTGATAAAAAAACCCACCTGTATATAACTATTGTATTGAAGGATAGAACCCTTAAATGAAATGAG  
TACTCTACTTCACTTTCTTAA-----  
-----  
-----  
ATGGATGGAATCAAATATATAGTCTTTACAGAAAAAGTATTCCGGTTATTGGGG---  
AACAATCAATATACTTCTAATGTGCAATCAGGATCAACTAGGACAGAAATCAAGCATTGGGTGCAACTCTTCTTTGGTGT  
CAAGGTAATAGCTATGAATAGTCATCGACTC-----CAGGGAAAG-----  
GGTAGAAGAATGGGACCTATTATAGGACATACAATGCATTACAGACGTATGATCATTACGCTTCAACCGGGTTATTCTAT  
TCCACCTCTTATAGAGAAAAGAACTTAA-----  
ATGGCGGTTCCAAAGAAACGTACTTCTATATCAAAAAACGTATTCGTAGAAATATTTGGAAAAA---  
CGGGGATATTGGGAAGCTAAAAGGGCTTTTTCTTAGCTAAATCC-----ATTTCTTCTGGACGT-----  
TCAAAAAGTTTTTTT-----GTGTTACAA-----AAA--  
-AATAAG---CAA-----  
ATGGCCAAG---GGTAAAGATGCT---AGAGTAATAGTTCTTTTGGAAATGTACCAGCTGTGTC-----  
CGAAATGGTTTTCAATAAACAA-----  
AAAAAACCATCGGGCGTTTTCAAGATATATTACTCAAAGGAATCGACACAATACACCCGGTCGATTAGAATTGAGAAAATT  
TTGCCCATATTGTCAAGCATAACGATTCACGGAGAGATAAAGAAA-----  
ATGAAAATAAGAGCCTCTGCTCGTAAAATTTGTGAAAAATGTCGTTTTGATTTCGTAGACGTGGACGAATTTTAGTAATTTG  
TTCC---AACCCGAGACATAAACAGAGACAAGGA-----ATGGTT-----  
CGAGAGGAAATAGCAGTAGCCACT-----GGCGCACCCGGTGGAAGTGCGTTGAATCA---AGAATAGAC---  
AGTAAGCGACTT---  
TATTATAGCCGTTTTATTCTGTCCCCGCTTATGAAAGGTCAAGCAGATATGATAGGTATCGCGATGCGAAGAGCTTTACT  
TGGAGAAATAGAAGGAACATGTATTACACGTGTAATACTGAGAAGGTGCCTCATGAATTTTCAACGATAGTCGGTATTG  
AAGAATCAGTACATGAAATTGTAATGAATTTGAAAGAAATTGTATTGAGAAGTAATCTGTATGGAACCTCTCGAC---  
GCATCTATTTGCATCAGGGGCTCTAGATATGTAACGGCTCAAGATATCATTTTACCACCTTCTGTGCAAAATAGTTGATGC  
TACACAGCATATAGCTAATCTGACGGAACGAGTTGATTTGTGTATTAATTAACAATCGAGAGAGATCGCGGATATAGTA  
TGAAAACCCCT---CATAACGACGAAGATGGA---AGTTATCCG-----

ATAGATGCTATATTCATGCCTGTTTCGAAATGCAAATCATAGTGTTTCATTCTTACGGGAATGGGAATGAA-----  
AAACAAGAGATA

Platanus

GTGTACTAGCTAAAGCGTTACGTATGTCCGGTGGAGATCATATTCACGCTGGTACCGTAGTAGGTAACTTGAAGGGGAA  
AGAGAAATCACCTTGGGCTTTGTTGATTTACTACGTGATGATTTTATTGAAAAAGACCGAAGTCGCGGTATTTATTTTAC  
TCAAGATTGGGTCTCTCTACCAGGTGTTCTGCCCGTGGCTTCGGGGGGTATTACGTTTTGGCATATGCCTGCTCTGACTG  
AGATCTTTGGGGATGATTCCGTACTACAGTTCGGTGGAGGAACTTTAGGACACCCTTGGGGAAATGCACCGGGTGCAGTA  
GCTAATCGAGTAGCCCTAGAAGCGTGTGTACAAGCTCGTAATGAGGGACGTGATCTTGCTCGTGAAGGTAATGAAATTAT  
CCGTGAAGCTTGCAAATGGAGCCCTGAACTAGCT---GCCGCTTGTGAG---GTATGG---AAGGAGATCAAATTCGAA--  
--TTCGAAGCAATGGATACTTTGTAA-----

ACGGCGATACATTTATACAAAACCTTCTACCCCGAGCACACGCAATGGAGCCGTC-----GACAGT-----  
CAAGTGAAATCCAATCCACGAAAT-----

AATTTGATCTATGGACAGCATCGTTGTGGTAAAGGTCGTAATGCCAGAGGAATCATTACCGCAGGGCATAGAGGGGGAGG  
TCATAAGCGTCTATACCGTAAAATCGATTTTCGACGGAATAAAAA---AACATAGAGGGTAGAATC-----  
--

GTAACCATAGAATACGACCCTAATCGAAATGCATACATTTGTCTCATACTATGGGGATGGTGAAGAAGAGATATATTTT  
ACATCCCAGAGGGGCTATAATTGGAGATTCCATTGTTTCTGGT-----

ACAGAAGTTTCTATAAAAATGGGAAATGCCCTACGACTGGGAAATGCCCTACCTTTG-----

ACCGATATGCCCTTAGGCACGGCCATACATAACATAGAAATCACACTTGGAAAGGGTGGACAATTAGCTAGAGCAGCGGG  
TGCTGTAGCGAAACTGATTGCAAAGAGGGTAAATCGGCCACATTAATAATTACCCTCTGGGGAGGTCCGTTTGATATCCA  
AAAAGTCTCAGCAACATTCGGACAGGTGGGTAATGTTGGGGTGAACCAGAAAAGTTTGGGTAGAGCCGGATCTAAGTGT  
TGGCTAGGTAAGCGTCTGTAGTAAGAGGAGTAGTTATGAACCCTGTAGACCATCCCCATGGGGGTGGTGAAGGGAGGGC  
CCCAATTGGTAGAAAAACCCCAACCCCTTGGGGTTATCCTGCGCTTGGGAAGAAGAAGTAGAAAAAGGAATAAATATA  
GTGATAGTTTATTCTTCGTCGCCGTAATA-----

ATGATTCAACCTCAGACCATTGTAATGTAGCGGACAACAGCGGGGCTCGAGAATTGATGTGTATTCGAATCATAGGAGC  
T---

AGTAATCGCCGATATGCTCATATTTGGTACGTTATTGTTGCTGTAATCAAAGAAGCAGTGCCCAATATGCCTCTAGAGAG  
ATCAGAAGTGATCAGAGCTGTAATTGTACGTACATGTAAAGAAGTCAAACGCGACAACGGTATGATAATAAGATATGATG  
ACAATGCAGCAGTTTGTTCATTGATCAAGAAGGA---

AATCCAAAAGGAACTCGAGTTTTTGGTGCATCGCTCGGGAATTGAGACAGTTGAGTTTTACTAAAATAGTTTTATTAGC  
TCCTGAGGTATTA---ATGCTTAGT---

CCCAAAAAGAACAGATTCCGTAACAACATAGAGGAAGAATGAAGGGAATATCATATCGAGGCAATCGTATTTCTTTTGG  
TAGATACGCTCTTCGGGCACCTTGAACCCGCTTGGATCACATCTAGACAAATAGAAGCAGGGCGACGAGCAATGACACGAT  
ATGCACGTCGTGGTGGAAAAATATGGGTACGTATATTTCCAGACAAACCCGTTACAGTAAGACCTACGGAAACACGTATG  
GGTTCCGGGAAAGGATCTCCCGAATATTGGGTATCTGTGCTTAAACCCGGGTCGAATACTTTATGAAATGGGTGGAATATC  
AGAAATTGTAGCCAGAGAAGCTATTTCAATAGCTGCGTCCAAAATGCCTATACGAACCCAATTCGTTATTGCGGGATAG--  
-----

ATGACCAGAATTAGACGGGGATATATAGCTCGGAGACGTAGAACAATAATTCGTTTTATTTGCATCAACCTTTTCGAGGGGC  
TCATTCAGACTTACTCGAACCCTACTCAACAGAAAATGAGAGCTTTGGTTTTCGGCTCATCGGGATAGGGGCAGGCAAA  
AGAGAAATTTTCGTCGTTTGTGGATCACTCGGATAAATGCAGTAATTCGTGAAAAT-----  
AAGGTATCCTATAGTTATAGTCGATTAATACACGATCTGTACAAGAGGCAGTTGCTTCTTAATCGTAAAATACTTGCA--  
-----CAAATAGCTATATCAAATAGGAATTGTCTTTACATGATTTCCAATGAGATCATCAAATAA-----  
-----

ATGATAAACAAGATAAAGAAG-----

AACCCAGATACAGAAGTATACGCTTTAGGCCAACAT---

ATATGTATGTCCGCTCACAAAGCGCGAAGGGTAATTGATCAGATTCGTGGGCGTTCTACGAAGAAACACTTATGATACT  
CGAACTCATGCCTTATCGAGCATGTTACCCCATTTTTAAATTGGTTTTATTCTGCAGCAGCAAATGCTAGTCACAATATGG  
GTTTCAACGAAGCGGATTTAATCATTAGTAAAGCCGAAGTCAACGAAGGTCCTACCATGAAAAGGTTAAAACCTCGAGCT  
CGAGGACGTAGTTATCCGATAAAAAGACCCACCTGTCAATAAATACTATTGTATTGAAAAGATATATCCTTAGATGAAGAATA  
TCTCATATGGTTAAGAAAATATGGATGGATATATAGAAATAAGTATACAGATAGGATGTGTCGTGATAAGTATGGTATAG  
TGGGGTAG-----

ATGGATGGAATCAAATATGCAGTATTTACAGACAAAGGTATTCCGGTTATTGGGG---

AACAATCAATATACTTCTAATGTGCAATCAGGATCAACTAGGACAGAAATAAAGCATTGGGTGCAACTCTTCTTTGGTGT  
CAAGGTAATAGCTATGAATAGTCATCGACTC-----CCGGGAAAG-----

GGTAGAAGAATGGGACCTATTATGGGACATACAATGCATTACAGACGTATGATCATTACGCTTCAACCGGGTTATTCTAT  
TCCACCTCTTAGAAAGAAAAGAACTTAA-----

ATGGCGGTTCCAAAGAAACGTACTTCTATATCAAAAAAGCGTATTTCGTAAAAATATTTGGAAAAGA---  
AAGGCGGATTGGGCATCGGTAAAAGCTTTTTTCGTTAGCGAAATCT-----CTGTCTACCGGGAAT-----  
TCAAAAAGTTTTTTT-----GTGCGACAAATAAACAAAAACAAAAAATAA--

ATGGCCAAG---GGTAAAGATGTC---AGAGTTAGAGTTATTTTGAATGTATCAATTGTGTC-----  
CGAAACGGTGTTAAT-----  
AAGGAATCACCGGGCGTTTTCCAGATATATTACTCAAAGAATCGACACAATACGCCTAGTCGATTGGAATTGAGAAAATT  
CTGTCCCTATTGTTTCAAGCATAACGATTCATGGGGAGATAAAGAAA-----  
ATGAAAATAAGGGCTTCGGTTCGTAAAATTTGTGAAAAATGTGCGACTGATCCGTAGACGGGGACGAATTATAGTAATTTG  
TTCC---AACCCGAGACATAAACAAAGACAAGGA-----ATGGTT-----  
CGAGAGAAAGTAACAGTATCTACT-----CGGACACTACAGTGGAAGTGTGTTGAATCA---AGAGCAGAC---  
AGTAAGCGTCTT---

TATTATGGACGTTTTATTCTGTCTCCGCTTATAAAAAGGTCAAGCTGATACGATAGGCATTGCGATGCGAAGGGCTTTGCT  
TGGAGAAATAGAAGGAACATGTATCACACGTGCAAAATCTGAGAAGATACCGCATGAATACTCTACCATAGTAGGTATTG  
AAGAATCAGTACATGAAATTTAATGAATTTGAAAGAAATTGTATTGAGAAGTAATCTGTATGGAACCTCGCAAC---  
GCATCTATTTGCATCAGGGGCTCTGGATACGTAAGTCAAGACATCATCTCACCAGCTTCTGTGGAAACCGTTGATAA  
TACACAGCATATAGCTAATCTGACGGAACCAATTGATTTTTGTATTGAATTAGAAATCGAGAGGAACCGGGGATATCGTA  
TGAAAACACCA---AATAACTCTCAAGATGGA---AGTTATCT-----  
ATAGATGCTGTATTTCATGCCTGTTAGAAATGCGAATCATAGTATTCTATTCTTATGCAATGGAAATGAG-----  
AAACAAGAGATA

Populus

GTGTACTAGCTAAGGCATTACGTATGTCTGGTGGAGATCATATTCCTCTGGTACCGTAGTAGGTAACTTGAAGGGGAA  
AGAGACATAACTTTGGGTTTTGTTGATTTACTGCGTGATGATTTTGTGAAAAAGATCGAAGCCGCGGTATTTATTTCCAC  
TCAAGATTGGGTCTCTCTACCGGGTGTCTACCCCGTGGCTTCGGGGGGTATTACGTTTTGGCATATGCCTGCTCTGACCG  
AGATCTTTGGAGATGATTCCGTACTACAATTCGGTGGAGGAACTTTAGGGCACCCCTTGGGGAAATGCACCCGGTGCCGTT  
GCTAATCGAGTAGCTCTAGAAGCATGTGTACAAGCTCGTAATGAGGGACGTGATCTTGCTCGTGAGGGTAATGAAATTAT  
CCGTGAAGCTAGCAAATGGAGCCCTGAACCTAGCT---GCTGCTTGTGAA---GTATGG---AAGGAGATTAATTTGAA--  
--TTCCAAGCAATGGATAACGTTG-----

ATGGCGTACATTTTATACAAAACCTTCTACCCCGAGCACACGCAATGGAGCCGTA-----GACAGT-----  
CAAGTGAAATCCAATACACGAAAT-----  
AATTTGATCTATGGGCAGCATCGTTGTGGTAAAGGCCGTAATTCAGAGGAATCATTACCGCAAGGCATAGAGGGGGAGG  
TCATAAACGTCTATACCGTAAAATCGATTTTCGACGGAATGAAAA---TACATATATGGTAGAATC-----  
--

GTAACCATAGAATACGACCCTAATCGAAATGCATACATTTGTCTCATACTATGGGGATGGTGAAGAAGAGATATATTTT  
ACATCCCAGAGGGGCTATAATTGGAGATACCATTATTTCTGGT-----ACAGAAGTTCTATAAAAATG-----  
-----GGAAATGCCCTACCTTTG-----

ACCGATATGCCCTTAGGCACGGCCATACATAACATAGAAATCACACTTGAAGGGGTGGACAATTAGCTAGAGCTGCAGG  
TGCTGTAGCGAAACTGATTGCAAAAGAGGGGAAATCGGCCACATTAATAATTACCTTCTGGGGAGGTTGTTTTAATATCCA  
AAAAGTCTCAGCAACAGTCGGACAAGTAGGGAATGCTGGGGTGAACCAGAAAAGTTTGGGTAGAGCCGGATCTAAATGT  
TGGCTAGGTAAACGTCCTGTAGTAAGAGGAGTAGTTATGAACCCTGTAGACCATCCCCATGGGGGTGGTGAAGGGGAGGGC  
CCCAATTGGTAGAAAAAACCCGCAACCCCTTGGGGTTATCCTGCACTTGAAGAAGAAGTAGAAAAAGGAATAAATATA  
GTGATAATTTGATTCTTCGTGCGCCGAGTAA-----

ATGATCCAATCTCAGACCCATTTGAATGTAGCAGATAATAGCGGAGCTCGAGAATTGATGTGTATTGGAATCATAGGAAC  
T---

AGTAATCGCCGATATGCTCATATCGGCGACATTATTATTGCTGTGATCAAGGAAGCAGTCCCCAATTCACCTCTAGAAAG  
ATCTGAAGTGATCAGAGCTGTAATTGTGCGTACTTCTAAAGAACTCAAACGCGACAACGGTATGATAATACGATATGATG  
ACAACGCTGCAGTTGTAATTGATCAAGAAGGA---

AATCCAAAGGGAACCTCGAATTTTTGGTGAATCGCTCGGGAATTGAGACAGTTAAATTTCACTAAAATAGTTTTATTAGC  
ACCTGAAGTATTA---ATGCTTAGT---

CCCAAAAGAACCAGATTCGTAACAACATAGAGGAAGAATGAAAGGAATATCTTCTCGAGGCAATCGTATTTGTTTCGG  
TAGATATGCTCTTCAGGCACCTTGAACCCGCTTGGATTACGTCTAGACAAATAGAAGCAGGGCGTCGGGCAATGACACGAA  
ATGTACGCCGCGGTGAAAAATATGGGTACGTATCTTTCCCGACAAACCAGTTACCCTAAGACCCTCGGAAACACGTATG  
GGTTCCGGGAAGGGATCTCCCGAATATTGGGTAGCTGTGTTAAACCAGGTAGAAATGATTTATGAAATGGGCGGGGTAGC  
AGAAAATATAGCCAGAAAGGCTATTTCAATAGCAGCGTCCAAAATGCCTATACGAACTCAATTCATTATTTTGGAGA----

ATGACCAGAATTAGACGAGGATATATAGCTCGGAGGCGTAGAACAAAAATTCGTTTTATTACATCAAGCTTTTCGTGGGGC  
TCATTCAGACTTACTCGAACTATGATTCAACAAAAAATAAAGCTTTGTTTTCGGCCTATCGGGATAGAGATAGGCACA

AAAGAAATTTTCGGTGTATGGGTCACTCGTATAAATGCAGCAATTCGAGAGAAT-----  
GGAGTATCCTATAGTTATAGTACATTAATAAACAATCTGTACAAGAGACAGTTGCTTCTTAATCGTAAAATACTTGCA--  
-----CAACTAGCTATATTAATAGGAATTGCCTTTATCTGATTTCCAATGACATGATAAAA-----  
-----  
ATGATAAAGAAGAGAAAAAAG-----AACCCATAT---  
GAAGCATCCGCTTCAGGGTTCTAT---  
ATATCTATGTCTGCTCACAAAGCGCGAAGAATAATTGATCAGATTCGTGGACGTTCCCTATGAGGAAACACTTATGATACT  
CGAACTAATGCCTTATCGAGCATGTTATCCCATTTTAAATTGGTTTTATTCCGCAGCAGCCAATGCTAGTCACAATATGG  
GTTTGAACGAAGCCAGTTTAGTCATTAGCAAAGCCGAAGTCAACGAAGGTGCTACTATGAAAAATTTAAACCTCGGGCT  
CGAGGACGAAGTTATCTGATAAAAAGACCGACTTGCCATATAAGTATTGTATTGGAGGATATATCATATGAAGAATATGA  
AGAAGATTTTCTACGAAGAATATGA-----  
-----  
ATGGATGGAATCAAATATGCAGTAGTTACAGACAAAAGTATTCCGGTTATTGTTG---  
AAAAATCAATATACTTCTAATGTGCAATCAGGATCAACTAGGACAGAAATAAAGCATTGGGTGCGAACTCTTCTTTGGTGT  
CAAGGTAATAGCTATGAATAGCCATCGACTC-----CCGGGAAAG-----  
GGTAGAAGAATGAGACCTATTATGGGACATACAATGCATTACAGACGTATGATCATTACGCTTCAACCGGGTTATTCTAT  
TCCACCTCTTAGAAAGAAAAGAACTTAA-----  
-----  
-----ATGGCCAAT---GGTAAAGACGTC---  
CGAATAAGGGTTATTTTAGAATGTACCAGTTGTGTT-----CGAAAGAGTGTAAAT-----  
AAGAAATCAATAGGCATTTCTAGATATATTACTCAAAGAATCGACACAATAGGCCTAGTCGATTGGAGTTGAGAAAATT  
CTGTCCCTATTGTTACAAACATACAATTCACGGGGAGATAAAGAAA-----  
ATGAAGATAAGGGCTTCCGCTCGTAAAATTTGTGAAAAATGTGCGACTAATACGTCGACGGGGACGAATTCTAATAATTTG  
CTCC---AACCCGAGACATAAAACAAAGACAAGGA-----ATGGTT-----  
CGAGAGAAAGTAAGAATATCTACT-----CGGACACTACAGTGAAGTGTGTTGAATCA---AGAGCTGAC---  
AGTAAGCGTCTT---  
TATTATGGACGTTTTATTCTGTCTCCACTTATGAAAGGTCAAGCCGACACAATAGGCATTGCGATGCGAAGAGCTTTGCT  
TGGAGAAATAGAAGGGACATGTATCACACGCGCAAAATCTAAGAAAAATACCACACGAATTTTCTACTATAACGGGTATT  
AAGAATCAATACATGAAATTTAATGAATTTGAAAGAAATTGTATTGAGAAGCAATTTATATGGAAGTCAATGAC---  
GCGTCTATTTGTGTCAAGGGTCTCGGATGTGTAAGTCAAGACATCATCTTACCGCCGTCTGTGGAAATCATTGATAA  
TACACAACATATCGCTAGCTTAAGGGAACCGATTGATTTGCATATTGGATTAGAAATCGAGAGGAATCGTGGCTATTGTA  
TGAAACCGCCA---AAAACTTTCAAGACGGA---AGTTATTCC-----  
ATAGATGCTGTATTTCATGCCTGTTTCGAAATGCGAATCATAGTGTTCATTCTTATGGAAATGGGAATGAA-----  
AAGCAAGAGATA  
Ranunculus  
GTGTAAGTAAAGCGTTACGTATGTCTGGTGGAGATCATATTCCTCCGGTACCGTAGTAGGTAAACTGGAAGGGGAA  
AGAGAGATCACCTGGGTTTTGTTGATTTACTACGTGATGATTTTATTGAAAAAGACCGAAGTCGTGGTATTTACTTCAC  
TCAAGACTGGGTCTCTTACCAGGTGTTTACCCGTTGCTTCAGGGGGTATTACGTTTTGGCATATGCCTGCTCTGACCG  
AGATCTTTGGGGATGATTCCGTAACAGTTCGGTGGAGGAACTTTAGGACACCCTTGGGGGAATGCACCGGGTGTGTA  
GCGAATCGAGTAGCCCTAGAAGCTTGTGTACAAGCTCGTAATGAGGGACGTGATCTTGCTCGTGAAGGTAATGAAATTAT  
CCGTGAGGCTTGCAAATGGAGCCTTGAAGTAGCC---GCTGCTTGTGAG---GTATGG---AAGGAGATCAAATTCGAA--  
---TTTGAAGCAATGGATACTTTG-----  
GCGATACATTTATAAAAACCTTACCCCGAGCACACGCAATGGAGCCGTC-----GGCAGT-----  
CAAGTGAATCCAATCCACGAAAT-----  
AATTTGATCTATGGACAGCGTCATTGTGGTAAAGGTGCGTAATGCCAGAGGAATCATTACCGTAAGGCATAGAGGGGGAGG  
TCATAAGCGTCTATACCGTAAAATCGATTTTCGACGGAATGAAAA---GACATATCTGGTAAAATC-----  
--  
GTAACCATAGAATACGACCCAAATCGAAATGCATATATTTGTCTCATACTATGGGGATGGTGAAGAGATATATTTT  
ACATCCCAGAGGGGCTATAATTGGAGATACCATTGTTTCTGGT-----ACAGAAGTTCTATCTCAATG-----  
-----GGAAATGCCCTACCTTTGAGT---  
?????ATGCCCTTAGGCACGGCCATACATAACATAGAAATCACACTTGGAAAGGGTGGACAATTAGCGAGAGCAGCGGG  
TGCTGTAGCGAAACTGATTGCAAAAGAGGGTAAATCGGCCACATTAATAATTACCCTCTGGGGAGGTACGTTTGATATCCA  
AAAAGTCTCAGCAACAGTCGGACAAGTGGGTAATGTTGGGGTGAACCAGAAAAGTTTGGGTAGAGCCGGATCTAAGCGT  
TGGCTAGGTAAGCGTCTGTAGTAAGAGGAGTAGTTATGAACCCTGTAGACCATCCCCATGGGGGTGGTGAAGGGAGGGC

CCCCATTGGTAGAAAAAACCCACAACCCCTTGGGGTTATCCTGCGCTTGGGAAGACGAAGTCGAAAAAGGAATAAATATA  
GTGATAGTTTGGATTCTTCGTCGCCGTAGTAAA-----  
ATGATTCAACCTCAGACCTATTTAAATGTAGCGGACAACAGCGGGGCTAGAAAATTAATGTGTATTAGAATCATAGGAGC  
T---  
AGTAATCGACGTTATGCTCATATTGGCGACGTTATTGTTGCGGTAATCAAAGAAGCAGTTCCCAATATGCCTCTACAAAG  
ATCAGAAGTGATCAGAGCTGTAATTGTACGCACGTGTAAAGAACTCAAACGTGACAATGGTATGATAATACAATATGATG  
ACAATGCAGCAGTTGTCATTGATCAAGAAGGA---  
AATCCAAAAGGAACCTCGAGTTTTTGGTGCAATCGCTCGAGAGTTGAGACAGTTGAATTTTACTAAAATAGTTTCATTAGC  
CCCTGAAGTATTA-----  
CTTAGTAACCCCAAAGAACCAGATTTTCGTAAACAACATAGAGGAAGAATGAAGGGAATATCTTATCGAGGCAATCGAAT  
TTGTTTCGGGGGATATGCCCTTCAGGCACTTGAACCCGCTTGGATCACATCTAGACAAAATAGAGGCGGGGCGACGAGCTA  
TGACACGATATGCGCGCCGTGGTGGAAAAATATGGGTACGTATATTTCCAGACAAAACCCGTTACAGTAAGGCCTGCCGAA  
ACACGTATGGGTTCCGGGAAAGGATCTCCCGAATTTTGGGTATTTCGTCGTTAAACCTGGTTCGAATACTTTATGAAATGGG  
TGGAGTATCAGAAATTGTAGCCAGAGAAGCTATTTCTATAGCTGCGTCCAAAATGCCTATAAGAACGCAATTCATTATTG  
CGGA-----  
ATGACCAGAATTAGACGAGGGTATGTAGCTCGGAGACGTAGAACAAAAATTCGTTTATTTGCATCAACTTTTCGAGGGAC  
TCATTCAAGACTTACTCGAAGTACTATTCAACAGAAAATGAGAGCCTTGGTTTCTGCTCATCGGGATAGGGGCAGGCAAA  
AGAGAAATTTTCGCCGTTTGTGGATCAGTCGGATAAATGCAGCAATTCGTAAGATG-----  
GGGGTATCCTATAGTTATAGTAGATCAATACATGATCTGTACAAGAGGCAATCACTTCTTAATCGTAAAATACTTGCA--  
-----CAAATAGCAATATCAAATACGAATTGTCTTTACATGATTTCCAATAAGATTCTTAAGAAAGTA-  
-----  
ATGATAAAGAGT-----  
GACCCGGATGTAGAAGTATACGCTTTAGGTAAACAT---  
ATACGTATGTCTGCTCATAAAGCACGAAGAGTAATTGATCAGATTCGTGGGCGCCCCTACGAGGAAACACTTATGATACT  
AGAACTCATGCCTTATCGAGCATGTTATCCTATTTTAAAATTGGTTTATTCTGCAGCAGCAAATGCTAGTCACAATATGG  
GTTTTAATGAAACGGCTTTAATTATTAGTCAAGCCGAAGTTAATGAGGGTACTATCACGAAAAAGTTAAAACCACGAGCT  
CGAGGACGTAGTTTTGCGATAAAAAGACCTACCTGTCAATAACTATTGTATTGCAAGATATATCAAAAGATAAAAAATA  
T-----TTCATATGGTTA-----  
AGAAAATATGGA---  
TGGATATATAAAGATAAGTATACAGATGTGAGAGAGGATCTATATATGATGGACCATATGCTATATCGAAACAGAAT  
GACGTGGATTAATAGAGAAATGATATGGCCTTATAGAGACAGTGAGGTATTATGGGACAAAAAATAAATGGATGGAATCA  
AATATGCAGTATTTACAGACAAAAGTATTCGGTTATTGGGG---  
AACAAATCAATATACTTCTAATGTGCAATCAGGATCAACTAGGACAGAAATAAAGCATTGGGTGCAACTCTTCTTTGGTGT  
CAAGGTACTAGCTATGAATAGTCATCGACTC-----CCGGGAAAG-----  
GGTAGAAGAATGGGACCCATTATGGGACATACAATGCATTACAGACGTATGATCATTACGCTTCAACCGGGTTATTCTAT  
TCCACCTCTTAGAAAGAAAAGAACTTAA-----  
ATGGCAGTTCGGAAAAACGTACTTCTATATCCAAAAGCGTATTCGTAAAAATTTTGGAAAAAC---  
AAAGCATATTTGGGCAACAATAAAAGCTTTTTCTTTAGCAAAATCT-----CTTCCACCGGGAAT-----  
TCTAAAAGTTTTTTT-----GTGCGACAAACAAACAAA-----  
-----  
ATGGCTAAG---GGTAAAGATGTC---AGAACAAGAGTTATTTTGGAAATGTAACAGTTGTGTT-----  
CGAAACGATATTAAT-----  
AAGAAATCGCGGGGCATTTTCGAGATATATTACTCAAAGAATCGACACAATACGCCTAGTCGATTGGAATTGAGAAAATT  
TTGTCCCTATTGTTACAAGCATAACGATTCATGGGGAGATAAAAAA-----  
ATGAAAATAAGAGCCTCCGTTTCGAAAATTTGTGAAAAATGTGCGGCTGATCCGTAGACGGGGACGAATTATCGTAATTTG  
TTCC---AATCCGAGGCATAAACAGAGACAGGGA-----ATGCTT-----  
CGAGATGAAGTAGCAGTATCGGCT-----CGGACACTGCAGTGGAAAGTGCCTTGAATCA---AGAGCAGAC---  
AGTAAGCGTCTT---  
TATTATGGACGTTTTTATTCTGCTCCGCTTATGAAAGGTCAAGCCGATACAATAGGCATTGCAATGCGAAGGGCTTTGCT  
TGGAGAAATAGAAGGAACATGTATCACACGCGCAAAATCTGAAAAAATACCACATGAATATTCTACCATAGTAGGTATTG  
AAGAATCCGTACATGAAATTTAATGAATTTGAAAGAAATTTGTATTGAGAAGTAATTTGTATGGAACCTCGCGAC---  
GCATCCATTTGCGTTAAGGGTCTGGATATGTAAGTCTCAAGACATCATCTCACCAGCTTCCGTTGAAATCGTTGATAC  
TACACAGCATATAGCTAGTCTGACGGAACCTGTTGATTTTGTATTGGATTACAAATTGAGAGTAATCGTGGATATCGTA  
TGAAAAACACCA---AATAACGCTCAAAAAGGA---AGTTATCCT-----  
ATAGATGCTGTATTTCATGCCTGTTTCGAAATGCAAAATCATAGTATTCATTCTTATGGTAATGGGAATGAA-----  
AACCAGGAAATA

Spinacia

GTGTACTAGCGAAAGCGTTACGTCTATCTGGTGGAGATCATATTTACTCTGGTACCGTAGTAGGTAAGCTTGAAGGAGAA  
AGAGATATTACTTTAGGCTTTGTTGATTTACTACGTGATGATTATACTGAAAAAGACCGAAGTCGCGGTATTTATTTTAC  
TCAATCTTGGGTTTCCACACCAGGTGTTCTGCCTGTTGCTTCAGGCGGTATTCACGTTTGGCATATGCCTGCTCTAACCG  
AGATCTTTGGGGATGATTCTGTACTACAGTTTGGTGGAGGAACCTTTAGGACACCCTTGGGGGAATGCACCAGGTGCTGTA  
GCAAACCGAGTAGCTCTAGAAGCATGTGTACAAGCTCGTAATGAGGGACGTGATCTTGTCTCGCGAAGGTAATACAATTAT  
TCGCGAGGCTACCAAATGGAGTCCTGAACTAGCT---GCTGCTTGTGAA---GTATGG---AAGGAAATCAAATTTGAA-  
--TTCCCAGCAATGGATACAGTC-----  
ATGGCGATACATTTATACAAAACCTTCTACCTCGAGCACACGCAATGGAGCCGTT-----  
CAAGTGAAATCCAATCCACGAAAT-----  
AATTTGATCTCTGGACAGCGTCGTTGTGGTAAAGGTCGTAATGCCAGAGGAATCATTACCGCAAGGCATAGAGGGGGAGG  
TCATAAGCGTCTATACCGTAAAATAGATTTTAGACGGAATGAAAA---GACATATATGGTAAAATC-----  
--  
GTAACATAGAATACGACCCTAATCGAAATGCATACATTTGTCTCATACTATGGGGATGGCGAGAAGAGATATATTTT  
ACATCCCAGAGGGGCTATAATTGGAGATACCATTGTTTCTGGT-----ACAGAAGTTTCTATAAAAATG-----  
-----GGAAATGCCCTACCTTTG-----  
ACCGATATGCCCTTAGGCACGGCCATACATAACATAGAAATCACACTTGGAAAGGGGTGGACAATTAGCTAGAGCAGCGGG  
TGCTGTAGCGAAACTGATTGCAAAAGAGGGGAAATCGGCCACATTAATAATTACCTTCTGGGGAGGTCCGTTTGATATCCA  
AAAACCTGCTCAGCAACAGTCGGACAAGTGGGGAATGTTGGAGTGAACCAGAAAAGGTTGGGTAGAGCCGGATCTAAGCGT  
TGGCTAGGTAAGCGTCTCTGTAGTAAGAGGAGTAGTTATGAACCCTGTAGACCATCCCCACGGGGGTGGTGAAGGGAGGGC  
CCCAATTGGTAGAAAAAGCCCTACAACCCCTTGGGGTTATCCTGCACTTGGAAAGAAGAAGTAGAAAAAGGAATAAATATA  
GTGATAATTTTATTATTTCGTGACAGTAGTAAA-----  
ATGATTCAACCTCAGACCCATTTGAATGTAGCAGACAACAGCGGGGCTCGAGAATTGATGTGTATTCTGAATCATAGGAGC  
T---  
AGCAACCGTCGATATGCTCGTATTGGTGACGTTATTGTTGCTGTGATCAAAGAAGCAATCCCCAACACGCCCTTAGAAAG  
ATCAGAAGTGATCAGAGCTGTAGTTGTACGTACTTGTAAAGAATAAAACGCGACAACGGTATGATAATACGATATGATG  
ACAATGCTGCAGTTATCATTGATCAAGAAGGA---  
AATCCAAAAGAACTCGAATTTTGGTGCAATTGCCCGGAATTGCGACAA---  
AAATTTGCGAAAATAGTTTTTCATTAGCTCCTGAGGTATTA---ATGCTTAGT---  
CCAAAAAGAAGTACTAGTTCCGTAACAACATAGAGGAAGAATGAAGGGAATATCTTATCGAGGGAATCGTATTTGTTTCGG  
AAGATATGCTCTTCAGGCACCTTGAACCTGCTTGGATCACGTCTAGGCAAATAGAAGCAGGGCGGCGAGCAATGACACGAA  
ATGCGCGTTCGCGGTGGAAAAATATGGGTACGTATATTTCCAGACAAACCAGTTACAGTAAGACCCGCGGAAACCCGTATG  
GGTTCGGGAAAGGATCTCCCGAATATTGGGTAGCTGTTGTCAAACCAGGTGCAATACTTTATGAAATAAGCGGAGTAGC  
CGAAAATATAGCCGAAGGGCTGTGCAATAGCGGCATCGAAAATGCCTATACGAACTCAATTCATTATTTTCAGGA----  
-----  
ATGACTAGAGTTAAAAGAGGATATATAGCTCGAAGGCGCAGAAAAAAATTCGTTTTTTTTGCATCAAGCTTTTCGAGGGGC  
TCATTCAAGACTTACTCGAACTATTGCTCAACAGAAAATAAGAGCTTTGGTTTTCGGCTCATCGGGATAGAGATAGGCAAA  
AGAGAGATTTTCGTGCTTTATGGATCACTCGAATAAACGCAGCAATTCGCGAAAG-----  
GGGGTATACTATAATTATAGTAAATTTATACACGATCTGTACAAGAGACAGTTGCTTCTTAATCGTAAAATACTTGCA--  
-----  
CAAATAGCTATATTAATCCAAATTTGATTTTATATGATTTATAATGAGATCATAAAAAAAGAAGATTGCAAAAAATACCT  
CGAAATTATT-----  
ATGGGGTTTTTTTTAAAAAAGAAAAGAAAGCAGAATTTGATGTCTTTCGTCTGTACGGATTACATCACCCAGAGCCAGG  
AAAGTGCGATGAGATAACTACAAGAGGTTACTCG---  
ATATCTATGTCTGTTGACAAAGCCCAGAGTAATTGATCAGATCCGTGGGCGTTCCTACGCCGAAACACTTATGATATT  
AGAACTCATGCCCTATCGAGCATGTTATCCCATTTTTAAATTTGATTTATTCTGCAGCAGCAAATGCTAGTCATAATAAAC  
AATTTAATAAAGCAAATTTAATTATTAGTAAAGCCGAAGTGAATAAGGGCATTACCTTAAAAAAGTAAAACCGCGAGCT  
CGAGGACGTAGTTATATGATAAAAAGACCTACTTGTATATAACTATTGTATTAAGAGATATAACCCACTTTGATTCATA  
TGATAAATTTTTAGAGAGTTTTAACCCCAAAAAGTTAATAGCTTTATTAGGTCTTATGTCTACAGGGAGACGGCGCAAT  
TGTTGTGGTTCGTTTTAGAGAAAACCATAAAAATAAGAGTTTTTTTATACAAAATAGCCTTATTTAAAAGATATGAGGTA  
ATGTAA-----  
-----  
-----  
-----  
-----  
ATGGCAGTTCCAAAAAGCGTACTTCGATTTACAAAAACGTATTCGTAAAAATATTTGGAAAAA---  
AAGGGATATTGGGCGGCTTAAAAGCCTTTTCACTAGCAAATCT-----CTTTCTACCGGAAT-----



TCAAAAAGTTTTTTTT-----GTACGCAA-----ATA--  
-AGTAATCAAACCTTGGAA-----  
ATGGCTAAG---GGTAAAGATGTC---CGAGTAAAAGTTATTTTGAATGTACTGGTTGTGTT-----  
CGAAAGAGTGTTAAT-----  
AAGGGATCAAGGGGCGTTTCTAGATATATTACTCAAAGAATCGCCACAATACGCCTAGTCGGTTGGAATTGCGAAAATT  
CTGTCCCTATTGTTACAAGCATAACAATTCATGGAGAGATAAAGAAA-----  
ATGAAAATAAGAGCTTCTGTTCTGTCCTCAATTTGTGAAAAATGTGCGACTGATCCGCAGACGGGGACGAATTATAGTAATTTG  
TTCT---AACCCAAAACATAAACAACGACAAGGA-----ATGGTT-----  
CGAGAGAAAATAAGAGTATCTACT-----CAGACACTTCAGTGGAAGTGTGTTGAATCA---AGAACAGAT---  
AGTAAATGTCTT---  
CATTATGGACGCTTTATTCTCTCTCCACTTATGAAGGGTCAAGCTGATACAATAGGCATTGCGATGCGAAGAGCGTTACT  
TGGAGAAATAGAAGGAACATGTATCACACGTGCAAAATCTGAAAAAATACCACACGAATACTCTACCATATTAGGTATTC  
AAGAATCAGTACACGAAATTTAATGAATTTGAAAGAAATAGTATTGAGAAGTAATCTATATGGAACCTTGTGAG---  
GCGTCTATTTGTGTTAGGGGCCCCAGAGGTGTAAGTCTCAAGATATCATCTTGCCACCTTATGTAGAAATAGTTGACAA  
TACGCAGCATATCGCCAGCTTGACGGAACCAATTGATTTGTGATTGGATTACAACCTCGAGAGAAATCGGGGATATCATA  
TAAAGCGCCA---ATAACTTTCAAGACGGA---AGTTTTCT-----  
ATAGATGCTCTATTTCATGCCTGTTTCGGAACGTGAATCATAGTATTTCATTCTTATGGAAATGGGAATGAA-----  
AAACAAGAGATA  
Triticum  
GTGTATTAGCTAAAGCATTGCGTATGTCTGGGGGAGATCATATCCACTCCGGTACAGTAGTAGGTAAGTTAGAAGGGGAA  
CGCGAAATGACTTTAGGTTTTGTTGATTTATTGCGCGATGATTTTATTGAAAAAGATCGTGCTCGCGGTATCTTTTTCC  
TCAGGACTGGGTATCCATGCCAGGTGTTATACCGGTAGCTTCAGGTGGTATTTCATGTTTGGCATATGCCAGCTCTGACCG  
AAATCTTTGGGGACGATTCTGTATTACAATTTGGTGGAGGAACCTTAGGACATCCTTGGGGAAATGCACCTGGTGCAGCA  
GCTAATCGAGTGGCTTTAGAAGCCTGTGTACAAGCTCGTAACGAAGGGGCGCGATCTTGCTCGCGAAGGTAATGAAATTAT  
CCGAGCAGCTTGCAAATGGAGTCTGAAGTAGCC---GCAGCTTGTGAA---GTATGG---AAGGCGATCAAATTCGAG-  
--TTCGAGCCGGTAGATACTATTGATAAG-----  
ACGGCGAAACATTTATACAAAACACCTATCCCGAGCACACGCAAGGGAACCTTA-----GACAGG-----  
CAAGTGAAATCCAATCCACGAAAT-----  
AATTTGATCCATGGACGGCACCCTTGTGGTAAAGGTGCGTAATTCAGAGGAATCATTACCGCAAGCATAGAGGGGGAGGT  
CATAAAGCGCCTATACCGTAAAATAGATTTTCGACGGAATCAAAA---GACATATCTGGTAGAATC-----  
--  
GTAACCATAGAATCCGACCCTAATCGAAATGCATACATTTGTCTCATACTATGGGGATGGTGAAGAGATATATTTT  
ACATCCCAGAGGGGCTATAATTGGAGATACTATTGTTTCTGGT-----ACAAAAGTTTCTATATCAATG-----  
-----GGAAATGCCCTACCTTG-----  
ACCGATATGCCCTTAGGCACGGTTCATGCATAACAAAGAAAACACACGAGGAAGGGGTGGGCAATTAGCTAGAGCAGCAGG  
TGCTGTAGCGAAACACAAAGCAAAAGAGGGTAAAATGGCCACTTTAAGATTACCATCCGGGGAGGGCCGTATAGTAACCC  
AAAACAGCCTAGCAACAGTCGGACAAGAGGGTAAAGTAGGGGTGAACCAAAAAGTTTGGGTAGAGCCGGATCTAAGTGT  
TGGCTAGGTAACGCCCGTAGTAAGAGGGGTAGTTATGAACCCTGTGGACCACCCCATGGGGGCGGTGAAGGGAAAGC  
TCCATTGGTAGAAAAAAACCCACAACCCCTTGGGGTTATCCTGCGCTTGAAGAAGAAGTGAAGAAAGGAAAAAATATA  
GCGATAGTTTTATTCTTCGTCGCCGT---AAG-----  
ATGATTCAACCTCAGACCCTTTTTAAATGTAGCCGATAATAGTGGAGCTCGAAAATTGATGTGTATTTCGAGTCATAGGAGC  
TGCTGGTAATCAGCGATATGCTCGTATTGGTGTATTGTTGCTGTAATCAAAGACGCATTGCCCCAAATGCCTCTAG  
AAAGATCCGAAGTAATTCGAGCTGTAATTGTACGTACATGTAAAGAGTTCAAATGCGAAGACGGTATAATAATCCGCTAT  
GATGACAATGCTGCGGTTATAATTGATCAAAAAGGC---  
AATCCAAAAGGAACTCGAGTTTTTGGCGCGATTGCCGAGGAATTGAATTTTACCAAAATAGTTTCATTAGC  
TCCTGAAGTATTA---ATGCTTAGT---  
CCAAAAGAACCAGATTTTCGCAAAACAACATAGAGGAAGAATGAAAGGAAAATCCTGCCGAGGCAATCGTATTTGTTTTGG  
TAGATATGCTCTTCAAGCACTTGAACCCGCTTGGATCACGGCGAGACAGATAGAAGCAGGACGAAGAGCAATAACACGAT  
ATGCACGTCGTGGTGGAAAAATATGGGTACGTATATTTCCCGACAAACCGGTTACACTAAGACCCACAGAAACACGTATG  
GGCTCGGGAAAGGGGTCCCCGAATATTGGGTATCCGTTGTTAAACCTGGTTCGTATACTTTATGAAATGGGGGGAGTATC  
TGAAACTGTAGCTAGAGCAGCTATCTCCATAGCTGCCAGTAAAATGCCCATACGAAGTCAATTTATTTCGATTAGAGATA-  
-----  
ATGACCAGAGTTCGCGAGGATATATAGCCCGGAGACGACGAACAAAAATGCGTTTCAATTTGCCTCAAACCTTTAGAGGGGC  
TCATTTAAGACTTAATCGAATGATTACCCAACAGGTAAAAAGAGCTTTTGTTCCTCTCATCGAGATAGAGGTAGGCAAA  
AGAGGGATTTTCGTCGTTTGTGGATCACTCGGATAAACCGCAGCAACCGGGTATAT-----  
AAAGTATTCGATAGTTATAGTAAATTAATACACAACCTGTACAAGAAGAAATGATTCTTAATCGTAAAATGCTTGCA--  
-----CAAGTAGCTGTATCAAATCAAATAATCTTTACACGATTTCCAATAAAATAAAG-----

-----  
ATGACAAGTTTTCAAACCTAGTAAAGTATATCCCTAGGATAAAGAAGAAGAAAAGTGGGCTAAGGAACTCGCAAGGAAAGT  
TCCAACCGATCGTCTACTTAAAGTTTCGAGAGAGTTTTCAAAGCACAAAACGTATCCCTATGTCTGTTTTCAAAGCACAAA  
GAGTTCTTGACGAGATTTCGCTGGCGTTACTACGAGGAACTGTTATGATACTGAACCTCATGCCCTATCGAGCATCTTAT  
CCCATCTTAAAGTTGGTTTTATTTCGGCAGCCGCAAATGCTACTCATTATAGGGATTTTCGACAAAGCGAATTTATTTATTAC  
TAAAGCCGAAGTCAGTAGGAGTACTATTATGAAGAAATTCAGACCTCGAGCTCGAGGACGTAGTTTCCCCATAAAAAAAA  
GCATGTGTATATAACAATTGTACTAAATATAGTAAAGAAATCTTAA-----  
-----

-----  
ATGGATGGAATCAAATACGCAGTATTTACAGAAAAAGTCTTTCGTTTTATTGGGA---  
AAGAATCAATATACTTTTAAATGTGCAATCGGGATTCACTAAGACAGAAATAAAGCATTGGGTGCAACTCTTCTTTGGTGT  
TAAGGTAGTAGCTGTGAATAGCCATCGACTA-----CCCGGAAAAG-----  
GGTAGAAGAATGGGCCCTATTCTAGGACATACAATGCATTACAGACGTATGATCATTACCCTTCAACCGGGTTATTCTAT  
TCCACTTCTAGATAGAGAAAAAACTAA-----  
ATGGCAGTTCCAAAAAACGTACTTCAATGTCAAAAAAGCGTATTTCGTAAAAATATTTGGAAGAAA---  
AAGACTTATTTTTCCATAGTACAATCTTATTCTTTAGTAAAATCAAGATCATTTCGAGCGGTAATGAGCATCCAAAACC  
AAAGGGTTTTTTCT-----GGG-----  
-----

ATGGCCAAG---GGAAAAGATGTT---AGAATCAGAGTTATTTTGGAAATGCATCAGTTGTGTT-----  
CGAAAAGGTGCCAAT-----  
GAGGAATCGACGGGATTTCTAGATATAGTACTCAAAGAATCGCCACAATACACCCGGACAATTAGAATTCAAAAAATT  
TTGTGCTTATTGTGCGCAAGCATACGACTCATCACGAAATAAAGAAA-----  
ATGAAAATAAGAGCTTCCGTTTCGTAAAATTTGTACAAAATGTGCGACTGATTCGTAGGCGTGGACGAATTAGAGTCATTTG  
CTCT---AATCCGAAGCATAAAACAAAGACAGGGG-----ATGGTT-----  
CGAGAGGAGGTAGCAGGATCCACT-----CAAACACTACAGTGGAAAGTGTGTTGAATCA---AGAGTAGAT---  
AGTAAGCGCCTT---  
TATTATGGTCTGTTTCTTCTGTCCCCGCTTAGAAAAGGTCAAGCGGACACCGTTCGGTATTGCCTTGCGAAGAGCTTTACT  
TGGAGAAATAGAAGGAACATGTATCACACGTGCAAAATTTGGGAGCGTGCCGCACGAATATTCTACAATAGCAGGTATTG  
AAGAATCCGTACAAGAAATTTTACTAAATTTGAAAGAAATTTGTATTGAGAAGTAATCTCTATGGAGTTAGAGAC---  
GCATCCATTTGCGTCAAAGGTCCTAGATACATAACTGCTCAAGATATCATCTTACCGCCTTCCGTAGAAATCGTTGATAC  
GGCACAACCTATAGCTAACTTGACAGAGCCCATTGATTTCTGTATTGATTTACAGATCAAGAGAGATCGTGGATATCAGA  
CAGAACTCAGA---AAGAACTATCAAGATGGA---AGTTATCCT-----  
ATAGATGCTGTATCCATGCCTGTTTCGAAATGTGAATTATAGTATTTTTTTCTTGTGGGAATGGAAATGAA-----  
AAACACGAGATA

Typha

GTGTACTAGCTAAAGCATTACGTATGTCTGGTGGAGATCATATTCACGCTGGTACAGTAGTAGGTAACCTGGAAGGGGAA  
CGTGAGATGACTTTGGGTTTTGTTGATTTATTACGTGATGATTTTATTGAAAAGACCGTAGTCGCGGTATTTTCTTCAC  
TCAAGATTGGGTCTCTATGCCAGGTGTTTTGCCCGTGGCTTCAGGGGGTATTTCATGTTTGGCATATGCCTGCTCTGACCG  
AAATCTTTGGAGATGATTCCGTAACAGTTTGGTGGAGGAACTTTAGGACACCTTGGGGAAATGCACCTGGTGCAGTA  
GCTAATCGTGTGGCTTTAGAAGCGTGTGTACAAGCTCGTAATGAAGGACGTGATCTTGCTCGCGAAGGTGCTGAAATTAT  
CCGTGAAGCTTGCAAATGGAGTCCCTGAACTATCC---GCTGCTTGTGAA---GTATGG---AAAGAGATCAAATTCGAG-  
--TTCGACCCGGTAGATAAGCTAGAT-----

ACGGCGATACATTTATACAAAACCTTCTACCCCGAGCACACGCAATGGAGCCGTA-----GACAGT-----  
CAAGTGAAATCCAATCCACGAAAT-----

AATTTGATCTATGGACGGCATCATTGTAGTAAAGGTCGTAATGCCAGAGGAATCATTACCGCAGGGCATAGAGGGGGAGG  
TCATAAGCGTCTATACCGTAAAATCGATTTTCGACGGAATCAAAA---GACATATCTGGTAGAATC-----  
--

GTAACCATAGAATACGACCCTAATCGAAATGCATACATTTGTCTCATACTATGGGGATGGTGAAGAGATATATTTTT  
ACATCCCAGAGGGGCTATAATTGGAGATACCATTGTTTCTGGT-----ACAGAAGTTCTTATATCAATG-----  
-----GGAAATGCCCTACCTTTGAGT---

ACCGATATGCCCTTAGGCACGGCCATACATAACATAGAAATCACACGTGGAAAGGGTGGACAATTAGCTAGAGCAGCAGG  
TGCTGTAGCGAAACTGATTGCAAAAGAGGGTAAATCGGCCACATTAAGATTACCATCTGGGGAGGTCCGTTTGATATCCA  
AAAACCTGCTTAGCAACAGTCGGACAAGTGGGTAATGTTGGGGTGAACCAAAAAATTTGGGTAGAGCCGGATCTAAGTGT  
TGGCTAGGTAAGCGTCTGTAGTAAGAGGAGTAGTTATGAACCCTGTAGACCATCCCCATGGGGGCGGTGAAGGGGAGAGC  
CCCAATTGGTAGAAAAAACCCACAACCCCTTGGGGTTATCCTGCGCTTGGGAAGAAGAAGTAGGAAAAGGAAAAAATATA  
GTGATTGTTTTATTCTTCGTCGCCGT---AAA-----

ATGATTCAACCTCAGACCCTTTTGAATGTAGCGGATAACAGCGGAGCTCGAAAATTAATGTGTATTTCGAATCATAGGAGC  
T---

GGTAATCACCGATATGCTCATATTGGTGTATGTTATTGTTGCTGTAATCAAAGAAGCAGTTCCCAATATGCCTCTAGAAAG  
ATCAGAAGTAATTAGAGCTGTAATTGTACGTACATGTAAAGAACTCAAACGTGAAAACGGTATCATAATACGATATGATG  
ACAATGCTGCAGTTGTCATTGATCAAGAAGGA---

AATCCAAAAGGAACTCGAGTTTTTGGTGCATCGCTCGGGAATTGAGACAGTTGAATTTTACTAAAATAGTTTCATTAGC  
TCCTGAAGTCTTA-----

CCCCAAAAGAACCAGATTTTCGTAAACAACATAGAGGAAGAATGAAGGGAATATCTTGTGCGAGGCAATCATATTTCTTTTGG  
CAGATACGCTCTTCAGGCACTTGAACCCGCTTGGATCACAGCTAGACAAAATAGAAGCAGGGCGAAGGGCAATGACACGAT  
ATGCGCGTGCAGGTTGAAAAATATGGGTACGTATATTTCCCGACAAAACCTATTACACTAAGACCTGCAGAAAACACGTATG  
GGTTCCGGTAAAGGATCCCCGAATATTGGGTATCCGTTGTTAAACCGGGTTCGAATCCTTTATGAAATGGGTGGAGTATC  
AGAAACTGTAGCTAGAGCAGCTATCGCAATAGCTGCGCGCAAAATGCCTATACGAACTCAATTTCTTATTTTCAGGA----

ATGACCAGAGTTAGACGAGGATATACAGCTCGGAGACGTGCAACAAAAATTCGTTTATTTGCATCAACCTTTTCGAGGGGC  
TCATTCAAGACTTACTCGAACGATTACTCAACAGAAAATGAGAGCTTTGGTTTTCTCTCATCGAGATAGAGGCAGGCAAA  
AGAGGGATTTTCGTCGTTTGTGGATCACTCGGATAAATGCAGTAACTCGTGAGAAT-----  
AAGGTATTCTATAGTTATAGTAGATTAATACACAATCTGTACAAGAAGCAATTGCTTCTTAATCGTAAAATACTTGCG--  
-----CAAATAGCTATATCAAATAAGAATTGTCTTTACATGATTTCCAATAAGATCATCAA-----

ATGGCAGTTCACAAAAAACGTAATCTATGTCAAAAAACGTAATTCGTAGAAATATTTGGAAGAAA---  
AAGGGATCGTTAGCTGCAGTAAAAGCTTTTTCTTTAGCGAAATCG-----GTTTCCACTGGGCAT-----  
TCAAAAAGTTTTTTT-----GTGCGACAAAACAAATACTAAAGCC---  
TTGGAA-----

ATGGCCAAG---GGTAAAGATGTC---AGAGTCAGAGTTATTTTGGAAATGTACCAGTTGTGTC-----  
CGAAACGGTGTCAAT-----

AAGGAATCGCCGGGCATTTCTAGATATATTACTCAAAGAATCGCCACAATACACCCAGTCGATTAGAATTGAGGAAATT  
TTGTGCTATTGTACAAGCATACTATTTCATGGTGAATAAAGAAA-----

ATGAAAATAAGGGCTTCTGTTTCGTAAAATTTGTGAAAAATGTGCGGCTAATTCGGAGGGCGCGGACGAATTATAGTGATTTG  
TTCC---AATCCGAAACATAAACAGAGACAAGGG-----ATGGTT-----

CGAGAGGAAGTAGCAGGATCCACT-----CGAACAATACAGTGGAAGTGTGTTGAATCA---AGAGTAGAC---  
AGTAAGCGTCTT---

TATTATGGTTCGTTTCATTTTGTCCCCACTTATGAAAGGTCAAGCTGATACCATCGGTATTGCCATGCGAAGGGCTTTACT  
TGGAGAAATCGAAGGAACATGTATAACACGTGCAAAATCTGAGAGGGTGCCGCATGAATATTCTACAATAATAGGTATTG

AAGAATCAGTACACGAAATTTTACTAAATTTGAAAGAAATTTGATTAAGAAGTAATCTCTATGGAGTTAGAGAC---  
GCATCAATTTGCGTCAGAGGTCCTAGATATGTAACCGCTCAAGATATCATATTACCACCTTCCGTGGAAATAGTTGACCC

GACACAACATATAGCTAACCTGACGGAACCAATTGATTTGTATATTGAATTACAAATCAAGAGAGATCGCGGATATCGTA  
TGGAACCCACA---AATAACTCTCAAGACGGA---AGTTATCTT-----

ATAGATGCTGTATCCATGCCTGTTTCGAAATGCGAATCATAGTATTCATTCTTATGGGAATGGGAATGAA-----  
AAACAAGAAATA

Vitis

GTGTACTAGCTAAAGCCTTACGTCTGTCTGGAGGAGATCATATTCACGCCGGTACCGTAGTAGGTAACTTGAAGGAGAA  
AGAGAGATCACTTTGGGCTTTGTTGATTTATTACGTGATGATTTTGTGAAAAAGACCGAAGTCGCGGTATTTATTTTCAC  
TCAAGATTGGGTCTCTCTACCAGGTGTTCTGCCAGTGGCTTCTGGGGTATTACGTTTGGCATATGCCTGCTCTGACCG  
AGATCTTTGGAGATGATTCGTAACAGTTCGGTGGAGGAACTTTAGGACACCCTTGGGGAAATGCACCGGGTGGCGTA  
GCTAATCGAGTAGCTCTTGAAGCATGTGTACAAGCTCGTAATGAGGGACGTGATCTTGCTCGTGAGGGTAATGAAATTAT

CCGTGCAGCTAGCAAATGGAGTCCTGAACTAGCT---GCTGCTTGTGAA---GTATGG---AAGGAAATCAAATTTGAA--  
--TTCCCAGCAATGGATACTTTG-----  
ATGGCGATACATTTTATACAAAACCTTCTACCCCGAGCACACGCAATAGAGCCGTA-----GACAGT-----  
CAAGTGAAATCCAATCCACGAAAT-----  
AATTTGATCTATGGACAGCATCGTTGTGGTAAAGGTCGTAATGCCAGAGGAATCATTACCGCAGGGCATAGAGGGGGAGG  
TCATAAGCGTCTATACCGTAAAATCGATTTTCGACGGAATGAAAA---GACATATATGGTAGAATC-----  
--  
GTAACCATAGAATACGACCCTAATCGAAATGCATACATTTGTCTCATACTATGGGGATGGTGAGAAGAGATATATTTT  
ACATCCCAGAGGGGGCTATAATTGGAGATACCATTGTTTCTGGT-----ACAGAAGTTCCTATAAAAAATG-----  
-----GGAAATGCCCTACCTTTG-----  
ACCGATATGCCCTTAGGCACGGCCATACATAACATAGAAATCACACTTGGAAAGGGTGGACAATTAGCTAGAGCAGCGGG  
TGCTGTAGCGAAACTGATTGCAAAAAGAGGGGAAATCGGCCACATTAATAATTACCTTCTGGGGAGGTCCGTTTGATATCCA  
AAAACCTGCTCAGCAACAGTCGGACAGGTGGGAAATGTTGGGGTGAACCAGAAAAGTTTGGGTAGAGCCGGATCTAAGTGT  
TGGCTAGGTAAGCGTCTGTAGTAAGAGGAGTAGTTATGAACCCTGTAGACCATCCCCATGGGGGTGGTGAGGGGAGAGC  
CCCAATTGGTAGAAAAAACCCACAACCCTTGGGGTTATCCTGCACTTGGAAAGAAGTAGAAAAAGGAATAAATATA  
GCGATAATTTGATTCTTCGCCGCCGTAGTAAG-----  
ATGATTCAACCCCGACCCATTTGAATGTAGCGGACAACAGCGGGGCCGAGAATTGATGTGTATTGCAATCATAGGAAC  
T---  
AGTAATCGCCGATACGCTCATATTTGGTGACGTTATTGTTGCTGTGATCAAAGAAGTAGTACCAAATATGCCTCTAGAAAG  
ATCAGAAGTAATCAGAGCTGTAATTGTACGTACCTGTAAAGAACTCAAACGTGACAACGGTATGATAATACGATATGATG  
ACAATGCTGCAGTTATTATTGATCAAGAAGGA---  
AACCCAAAAGGAACTCGAATTTTTGGTGCGATCGTCCGGGAATTGAGACAGTTAAATTTTACTAAAATAGTTTCCTTAGC  
CCCTGAGGTATTA---ATGCTTAGT---  
CCCAAAAAGAACCAGATTCGGTAAACAACATAGAGGAAGAATGAAGGGAATATCTTATCGAGGTAATCGTATTTGTTTCGG  
TAGATACGCTCTTCAAGCACTTGAACCTGCTTGGATCACATCTAGACAAATAGAAGCGGGGCGACGAGCAATGACACGAA  
ACGTACGCCGTGGTGGAAAAATATGGGTACGTATATTTCCAGACAAACCAGTTACAGTAAGACCTACGGAAACACGTATG  
GGTTCGGGAAAGGATCCCCCGAATATTGGGTAGCTGTGTTAAACCAGGTAGAATACTTTATGAAATGGGCGGAGTAGC  
AGAAAATATAGCTAGAAAAGCTATTTCAATAGCGGGCGTCCAAAATGCCTATACGAACTCAATTCATTATTTTCGGGA----  
-----  
ATGACCAGAACTAGACGAGGATATATAGCTCGTAGACGTAGAACAATAATTCGTTTATTTACATCAAGCTTTTCGAGGAGC  
CCATTCAAGACTTACTCGAACTATTACTCAACAGAAAATCAGAGCTTTGGTTTTCGACTCATCGGGATAGAGATCGGCCAAA  
AGAGAGATTTTCGTCGTTTGTGGATCACTCGGATAAATGCAGTAATTCACGAGAAT-----  
GGGGCATCCTATAGTTATAGTAGATTTATACACGATCTGTACAAGAGGCAGTTACTTCTTAATCGTAAAATACTTGCA--  
-----  
CAAATAGCTATATCCAATAGGAATTGTCTTTATATGATTTCCAATGAGATCATAAAAATAAAGAGATTGTAAAGAATTCAC  
CGGAATGATT-----  
GAAAAAGAAGATATA-----  
AAATTA AAAACAGAAGTATACGCTTTAAGTCAATCT---  
ATCTCTATGTCTGCTCACAAAGCGCGAAGAGTACTTGGATCAAATTCCTTGGACGTTCCCTATCGGGAAACACTTACGATACT  
TGAACCTATGCCTTATCGAGCGTGTATCCCATTTTTAAATTAATTTATTCTGCAGCAGCAAATGCTAAGCACAAATATGG  
GTTTGAACGAAGAATATTTAGTCATTACTAAAGCCACAGTCAACGAGGGTACTACCGTGAAAAAATTGAAACCTCGAGCT  
CGAGGACGTAGTTATGCGATAAAAAGACCCACTTGTGCATATAACTATTGTATTGAAAGATACAGCCTTATATGAAAAATA  
TGTCGTAGAAAACCTCTATC-----AGGTGTTTA-----  
AAAAAACCGGA---TGGATATATAAAAAGAAGTCCACAGATATTACGTGTCATAATATG-----  
-----  
TATAGTAGTGGGGAGTATGGGACAAAAAATAAATGGATGGAATCAAATATGCAGTATTTACAGACAAAAGTATTCGGTT  
ATTGGGG---  
AAAAATCAATATACTTCTAATGTGCAATCAGGATCAACTAGGACAGAAATAAAGCATTGGGTGCAACTCTTCTTTGGTGT  
CAAGGTAATAGCTATGAATAGTCATCGACTC-----CCGGGAAAG-----  
GGTAGAAGAATGGGACCTATTATGGGACATACAATGCATTACAGACGTATGATCATTACGCTTCAACCGGGTTATTCTAT  
TCCACCTCTTAGAAAAGAAAAGAACTTAA-----  
ATGGCAGTTCCAAAAAACGTACTTCTATGTCAAAAAAGCGTATTCAAAAAATATTTGGAAAAGG---  
AAGGGATGGCGAGCCGCATTAAGGCTTTTGCGTAGCGAAATCT-----CTTTCTACCGGGAAT-----  
TCAAAAAGTTTTTTTT-----GTGCGCAA-----  
CTAATAATCAA---ACGTTAGAA-----  
ATGGCCAAG---AGTAAAGATGCC---CGAATAAGGGTCTTTTGGAAATGTACTAGTTGTGTA-----  
CGAGGCGGTGTTAAT-----

AAGGAATCAACAGGCATTTCCAGATATATTACTGAAAAAATCGACACAATACGCCCGGTCGATTGGAATTGCAAAAATT  
CTGTCCCTATTGTTATAAACATACGATTCATGGGGAGATAAAAAA-----  
ATGAAAATAAGGGCTTCTGTTTCGTAAAATTTGCGAAAAATGTCGACTGATCCGTAGACGGGGACGAATTATAGTAATTTG  
TCCC---AACCCGAGACATAAAACAAAGACAAGGA-----ATGGTT-----  
CGAGAGAAAGTAACAGTATCTACT-----CGGACACTGCAGTGGAAGTGTGTTGAATCA---AGAGTAGAC---  
ATAAGCGTCTT---  
TGTTATGGACGCTTTATTCTGTCTCCACTTATTAAGGTCAAGCCGACACAATAGGCATTGCGATGCGAAGAGCTTTGCT  
TGGAGAAATAGAAGGAACATGTATCACACGTGCAAAATCTGAGAAAATACCCCATGAATATTCTACCATAGTAGGTATTC  
AAGAATCAGTACATGAAATTTAATGAATTTGAAAGAAATGTATTGAGAAGTAATCTGTATGGAACCTCGCGGC---  
GCGTTTATTTGTGCCAGGGTCTGGATATGTAACCTGCTCAAGACATCATTTCACCGCCTTCTGTGGAATCGTTGATAA  
TACACAACATATAGCTAGACTGATGGAACCGATTGATTTGTGATTGGATTACAAATCGAGAGGAATCGCGGATATAGTA  
TAAAAAGGCCA---ATAACTTTCAAGACGGA---AGTTATCCT-----  
ATAGATGCTGTATTGCTGTTTCGAAATGCGAATCATAGTATTCATTCTTATGGGAATGGGAATGAA-----  
AGACAAGAGATA

Yucca

GTGTACTAGCTAAAGCATTACGTATGTCTGGTGGAGATCATATTCACGCTGGTACAGTAGTAGGTAAACTGGAAGGGGAA  
CGTGAGATGACTTTAGGTTTTGTTGATTTATTACGTGATGATTTTATTGAAAAGACCGAAGTCGCGGTATTTTTTTCAC  
TCAAGATTGGGTTTTCTATGCCAGGTGTTATTCCCGTGGCTTCAGGGGGTATTTCATGTTTGGCATATGCCTGCCCTGACCG  
AAATCTTTGGAGATGATTCCGTAACAGTTTGGTGGAGGAACCTTAGGACACCCTTGGGGAAATGCACCTGGTGC GGTA  
GCTAATAGGGTAGCTTTAGAAGCATGTGTACAAGCTCGTAATGAGGGACGTGATCTTGCTCGCGAAGGTAATGAGATTAT  
CCGCGAAGCTTGCAAATGGAGCCCTGAACTAGCC---GCTGCTTGTGAA---GTATGG---AAAGAGATCAAATTCGAA-  
--TTCGAACCAGTAGATAAGATAGAT-----  
ACGGCGATACATTTATACAAAACCTTCTACCCCGAGCACACGCAATGGAGCCGTA-----GACAGT-----  
CAAGTGAAATCCAATCCACGAAAT-----  
AATTTGATCTATGGACAGCATCGTTGTGGTAAAGGTCGTAATGCCAGAGGAATCATTACCGCAAGGCATAGAGGGGGAGG  
TCATAAGCGTCTATACCGTAAAATCGATTTTCGACGGAATGAAAA---GACATATCTGGTAGAATT-----  
--

GTAACCATAGAATACGACCCTAATCGAAATGCATACATTTGTCTCATACTATGGGGATGGTGGAGAAGAGATATATTTT  
ACATCCCAGAGGGGCTATAATTGGAGATACCATTGTTTCTGGT-----ACAGAAGTTCCTATATCAATG-----  
-----GGAATGCCCTACCTTTGAGT---

ACCGATATGCCCTTAGGCACGGCCATACATAACATAGAAATCACACTTGGAAAGGGTGGACAATTAGCTAGAGCTGCAGG  
CGCTGTAGCGAAGCTGATTGCAAAAGAGGGTAAATCGGCCACATTAAGATTACCATCTGGGGAGGTCCGTTTGATATCCA  
AAAACCTGCTTAGCAACAGTCGGACAAGTGGGTAATGTTGGGGTGAACCAAAAAGTTTGGGCAGAGCCGGATCGAAGTGT  
TGGCTAGGTAAGCGCCCTGTAGTAAGAGGAGTAGTTATGAACCCTGTAGACCATCCCCATGGGGGCGGGGAAGGGAGAGC  
CCCAATTGGTAGAAAAAACCTACAACCCCTGGGGTTATCCTGCGCTTGGGAAGAAGAAGTAGGAAAAGGAAAAAATATA  
GTGATAGTTTTATTCTTCGTCGCCGT---AAA-----  
ATGATTCAACCTCAAACCTTTTGAATGTAGCAGATAACAGCGGAGCTCGAGAATTGATGTGTATTGCAATCATAGGGGC  
T---

GGTAATCACCGATATGCTCATATTTGGTACGTTATTGTTGCTGTAATCAAAGAAGCAGTGCCCAATATGCCTCTAGAAAG  
ATCAGAAGTAATTAGAGCTGTAATTGTACGTACATGTAAAGAACTCAAACGTGACAACGGTATGATAATACGATATGATG  
ACAATGCAGCGGTTGTCATTGATCAAGAAGGA---  
AACCCAAAAGGAACCTCGAATTTTTGGGGCGATTGCTCGGGAATTGAGACAGTTGAATTTTACTAAAATAGTTTCATTAGC  
TCCCGAGGTATTA-----

AACCCAAAAGAACCAGATTTTCGTAAGCAACATAGAGGAAGAATGAAGGGAATATCTTGTGCGGGGCAATCAGATTAGTTT  
CGGCAGATACGCTCTTCAGGCACTTGAACCCGCTTGGATCACGGCTAGACAAATAGAAGCAGGGCGAAGAGCAATGACAC  
GATATGCGCGTTCGCGGTGGAAAAATATGGGTACGTATATTTCCCGACAAACCTGTTACAGTAAGACCTACAGAAACACGT  
ATGGGTTTCGGGGAAGGGATCCCCGAATATTGGGTATCTGTTGTTAAACCAGGTGCAATACTTTATGAAATGGGTGGAGT  
ATCCGAAACTGTAGCCAGAACAGCTATTTCAATAGCTGCGTGCAAAATGCCTATACGAACTCAATTTGTT-----  
-----

ATGACCAGAGTTAAACGAGGATATATAGCTCGGAGACGTGCAACAAAAATTCGTTTATTTGCATCAACCTTTATAGGGGC  
TCATTCAAGGCTTACCCGAACCGCTACTCAACAGAAAATGAGAGCTTTGGTTTCTCTCATCGAGATAGGGGCAGGCAAA  
AGAGGGACTTTTCGTCGTTTGTGGATCACTCGGATAAATGCAGCAGTTTCGTGAGAAT-----  
GGGGTATTCTATAGTTATAGTAGATTACATACACAATCTGTACAAGAAGCAATTGCTTCTTAATCGTAAAATACTTGCG--  
-----CAAATAGCTATATCAAATAAGAATTGTCTTTACATGATTTCCAATAAGATTGTCAA-----  
-----  
-----  
-----

-----  
-----  
-----  
-----  
-----  
-----  
-----  
-----  
-----  
-----

-----AAAAAGCGTATGCGTAGAAAATATTTGGAAGAAA---  
AAGGGAAATTTAGCTGCAATAAAAGCTTTTTCTTTAGCAAAGTCA-----GTTTCTACCGGAGAT-----  
TCAAAAAGTTTTTTTT-----  
GTGCAACAAACAACAGGTAAGAAAATCTTGGAA-----  
-----ATGGCTAAG---GGTAAAGATGTC---  
CGAGTTAGAGTTATTTTTGGAATGTACAAGTTGTATC-----CAAATGGTGTCAAT-----  
AAGGAATCGCCGGGCATTTCTAGATATATTACTCAAAGAATCGACACAATACACCCAGTCGATTAGACTTGAGAAAATT  
TTGTCGCTATTGTACAAGCATAACGATTTATGGGGAAATAAAGAAA-----  
ATGAAAATAAGGGCTTCTGTTTCGTAAAATTTGTGAAAAATGTCGACTGATCCGTAGGCGCGGACGAATTATAGTGATTTG  
TTCC---AATCCGAAACATAAACAGAGACAAGGA-----ATGGTT-----  
CGAGAGGAAATAGCAGCATCCACT-----CGAACACTACAGTGGAATGTGTTGAATCA---AGAGTAGAC---  
AGTAAGCGTCTT---  
TATTATGGTCGTTTCATTCTGTCCCCGCTCATGAAAGGTCAAGCCGATACCATAGGTATTGCCATGCGAAGGGCTTTACT  
TGGAGAAATAGAAGGAACATGTATCACACGTGCAAAATCTGAGAAGGTGCCGCATGAATATTCTACGATAGTAGGTATTG  
AGGAATCGGTACATGAAATTTTCATAAATTTGAAAGAAATTGTATTG-----AATCTGTATGGAGTTAGAGAC---  
GCATCCATTTGTGTGTCAGAGGTCCTAGATACGTAACCGCTCAAGATATCATCTCACCACCTTCCGTGGAAATAGTTGACAC  
AACACAGCATATAGCTAACCTGACAGAACCAATTGATTTGCGTATTGAATTACAAATCAAGAGAGATCGCGGATACCGTA  
TTAACCCACA---AATAACTCTCAAGACGGA---AGTTATCCT-----  
ATAGATGCTGTATCCATGCCTGTTTCGAAATGCGAATCATAGTATTTCATTCTTATGGGAATGGAAATGAA-----  
AAACAAGAAATA

Zea

GTGTATTAGCTAAAGCATTGCGTATGTCGGGGGGAGATCATATCCACTCCGGTACAGTAGTAGGTAAGTTAGAAGGGGAA  
CGCGAAATAACTTTAGGTTTTGTTGATTTATTGCGCGATGATTTTTATTGAAAAAGATCGTTCTCGCGGTATCTTTTTTAC  
TCAGGACTGGGTATCCATGCCAGGTGTTATACCGGTGGCTTCTGGGGGTATTTCATGTTTGGCATATGCCAGCTCTGACCG  
AAATCTTTGGAGATGATTCCGTATTACAATTTGGTGGAGGAACCTTTAGGACATCCTTGGGGAAATGCACCTGGTGCAGCA  
GCTAATCGTGTGGCTTTAGAAGCCTGTGTACAAGCTCGTAACGAAGGGCGCGATCTTGCTCGTGAAGGTAATGAAATTAT  
CAAAGCAGCTTGCAAATGGAGTGCTGAACTAGCC---GCAGCTTGTA---ATATGG---  
AAGGAGATCAAATTTGATGGTTTTCAAAGCGATGGATACCATA-----  
ACGGCGAAACATTTATACAAAACACCTATCCCGAGCACACGCAAGGGAACCGTA-----GACAGG-----  
CAAGTGAAATCCAATCCACGAAAT-----  
AAATTGATCCATGGACGGCACCGTGTGGTAAAGGTGCGTAATGCCAGAGGAATCATTACCGCAAGGCATAGAGGGGGAGG  
TCATAAGCGCCTATACCGTAAATCGATTTTCGACGGAATCAAAA---GACATATCTGGTAGAATC-----  
--  
ATAACCATAGAATACGACCCTAATCGAAATGCATACATTTGTCTCATACTATGGGGATGGTGAGAAGAGATATATTTT  
ACATCCCAGAGGGGCTATAATTGGAGATACTATTGTTTCTGGT-----ACAAAAGTTTCTATATCAATG-----  
-----GGAAATGCCCTACCTTTG-----  
ACCGATATGCCCTTAGGCACGGCCATACATAACATAGAAATCACACGTGGAAGGGGTGGGCAATTAGCTAGAGCAGCAGG  
TGCTGTAGCGAAACTGATTGCAAAAGAGGGTAAATTTGGCCACTTTAAGATTACCATCTGGGGAGGTCCGTTTGGTATCCC  
AAAAGTCTTAGCAACAGTCGACAAAGTGGGTAATGTTGGGGTGAACCAAAAAGTTTGGGTAGAGCCGGATCTAAGTGT  
TGGCTAGGTAACGCCCGTAGTAAGAGGGGTAGTTATGAACCCTGTGGACCACCCCATGGGGGTGGTGAAGGGAAAGC  
CCCCATTGGTAGAAAAAACCCACAACCCTTGGGGTTATCCTGCGCTTGGAAGAAGAAGTGGAAAAAGGAAAAAATATA  
GTGATAGTTTTATTCTTCGTCGCCGT---AAG-----  
ATGATTCAACCTCAGACCCTTTTAAATGTAGCAGATAACAGTGGAGCTCGAAAATTGATGTGTATTTCGAGTCATAGGAGC  
CGCTGGTAATCAGCGATATGCTCGTATTGGTGTATTATTATTGCTGTAATCAAAGACGCAGTGCCCCAAATGCCTCTAG  
AAAGATCCGAAGTAATTCGAGCTGTAATTGTACGTACACGTAAAGAATTCAAAGGCGACGACGGTATAATAATACGCTAT  
GATGACAATGCAGCAGTTATCATTGATCAAAAAGGA---  
AATCCAAAAGGAACTCGAGTTTTTGGCGCGGTTGCCGAAGAATTAAGAGAATTGAATTTGACTAAAATAGTTTCATTAGC

TCCTGAAGTATTA---ATGCTTAGT---  
CCCCAAAAGAAGTACTAGATTTTCGTAAACAACATAGAGGAAGAATGAAGGGAAAATCCTGCCGAGGCAATCATATTTGTTTTGG  
TAGATATGCTCTTCAAGTACTTGAACCCGCTTGATCACC GCGAGACAGATAGAAGCAGGACGAAGAGCAATGACACGAT  
ATGCACGTCGTGGTGGAAAAATATGGGTGCGTATATTTCCCGACAAACCGGTTACAATAAGACCCACAGAAACACGTATG  
GGCTCGGGAAAGGGATCCCCCGAATATTGGGTAGCCGTTGTTAAACCAGGTCGAATACTTTATGAAATGAGCGGAGTATC  
CGAAACTGTAGCTAGAGCAGCTATCTCTATAGCTGCCAGTAAAATGCCCATACGAAGTCAATTTCTTCGATTAGAGATA-

-----  
ATGACCAGAGTTCCGCGAGGATATATAGCTCGGAGACGACGAACAAAAATGCGTTCATTTGCCTCAAACCTTTAGGGGGGC  
TCATTTAAGACTTAATCGAGTGATTACTCAACAAGTAAGAAGAGCTTTTGTTCCTTCTCATCGAGATAGAGGCAGGCAAA  
AGAGGGATTTTCGTCGTTTGTGGATCACTCGGATAAACGCAGCAACACGGGTATAT-----  
AACGTATTCAATAGTTATAGTAAATTAATACACAATCTGTCCAAGAAGGAATTGATTCTTAATCGTAAAATGCTTGCA--  
-----CAAGTAGCTGTATCAAATCAAATAATCTTTACACGATTTCCAATAAAAATAAGG-----

-----  
ATGACAAGTTTCAAATTTGGTAAAGTATAACCCCTAGGATAAAAGAAGAAGAAG---  
GGGCTGAGAAAACCTCGCAAGAAAAGTTCCAACCGATCGTCTACTTAAATTCGAACGGGTTTTCAAAGCACAAAAACGCAT  
ACATATGTCTGTTTTCAAAGCACAAAGAGTTCTAGATGAGATTGCTGGCGTTACTACGAGGAAACCGTTATGATACTGA  
ATCTCATGCCTTATCGAGCATCGTATCCCATCTTAAAGTTGGTTTTATTCCGGCAGCAGCAAATGCTACTCATTATAGGGAT  
TTGACAAAAACGAATTTATTCATCACTAAAGCCGAAGTCAGTAGGAGTACTATTATGAAAAAATTCAGACCTCGAGCTCG  
AGGACGTAGTTATTCTATAAAAAAACGATGTGTAATATAACAATTGTACTAAATATAGTAAAGAAATCAAATAA-----

-----  
ATGGATGGAATCAAATACGCAGTATTTACAGAAAAGAGTCTTCGTTTATTGGGA---  
AAGAATCAATATACTTTAATGTGCAATCGGGATTCACTAAGACAGAAATAAAGCATTGGGTGCAACTCTTCTTTGGTGT  
TAAGGTAGTAGCTGTGAATAGCCATCGACTA-----CCCGGAAAG-----  
GGTAGAAGAATGGGACCTATTCTGGGACATACAATGCATTACAGACGTATGATCATTACCCTTCAACCGGGTTATTCTAT  
TCCACTTCTAGATAGAGAAACGAACTAA-----  
ATGGCAGTTCCAAAAAACGTAATTCGATGTCAAAAAAGCGTATTCGTAATAATCTTTGGAAAAA---  
AAGACTTATTTTCCATAGTACAATCTTATTCTTTAGCAAATCAAGATCATTCTAGGGGCAACGAGCATCCAAAACC  
AAAAGTTTTTCT-----GGG-----

-----  
ATGGCCAAG---GGCAAAGATGTT---AGAATCCGAGTTATTTTGGAAATGTATTAGTTGTGTT-----  
CGAAAGGGTACCAAT-----  
AAGGAATCGACGGGATTTCTAGATATAGTACTCAAAGAATCGCCACAATACGCCCGGACAATTAGAATTAAGAAAATT  
TTGTGCTTATTGTGCAAGCATAACCACTCATAATGAAATAAAGAAA-----  
ATGAAAATAAGAGCTTCCGTTTCGTAAAATTTGTACAAAATGTGCACTGATTGCGAGGCGTGGGCGAATTAGAGTTATTTG  
TTCC---AATCCGAAGCATAAAACAAAGACAGGGG-----ATGGTT-----  
CGAGAAGAGATAACAGGATCCACT-----CAAACACTAGAGTGGAAGTGTGTTGAATCA---AGAGTAGAT---  
AGTAAACGTCTT---  
TATTATGGTCGTTTCATTCTGTCTCCGCTTAGAAAAGGTCAAGCGGATACTGTGCGGTATTGCCTTGCGAAGAGCTTTACT  
TGGAGAAATAGAAGGAACATGTATCACACGCGCCAAATTTGGGAACGTGCCACATGAATATCCACAATAGTAGGTATTG  
AAGAATCCATACAAGAAATTTTACTAAATTTGAAAGAAATTTGTATTGAGAAGTAATCTCTATGGAGTTAGAGAC---  
GCATCAATTTGCGTCAAAGGTCCTAGATACATAACCGCTCAAGATATAATCTTACCGCTTCCGTAGAAATCGTTGATAC  
GACACAACCTATAGCTAACTTGAGAGAACCCGTTGATTTCTGTATTGAGTTACAGATCAAGAGAGATCGCGCATATCATA  
CGGAACCTCAGA---AAGAACTCTCAAGATGGA---AGTTATCCT-----  
ATAGATGCTGTATTTCATGCCTGTTTCGAAATGTGAATTATAGTATTTTTTCTTGTGGGAATGGAATGAA-----  
AAACACGAGATA

Acorus

CTTTTCTCGAAATATGGACAAATGGAAGTTAACTCCTAAAGAAGCACTTCACGAAGCTTCCCGTAATTTGATTGATTT  
ATTTATTCTTTTCTACATGCAGAGGAA-----GAGGACATTAAT-----TTCGAGGAAAATCAA---  
AACAGGTTTACTGTACCCCTTTTACCTTTTCTGATAGA-----TTGGCT-----AATCTAAAG-----  
AAAAACAAAAAAGAAATTCATTGAAATGTATTTTTATTGACCAATCAGAATTCCTCCAGGACCTATAATTGTCTCAA  
AAGGTCCAATATACATACATTATTGGACCTTTTGTAGTAACAGTCAAGAAGATCTTATGAAAATGAAATTTTTCGAATAG  
AAGATGTA AACAGATATTGGACACTCTA-----CAGAAGCATTTGCA---ATTGATTTACCTAAGAATAAG-----  
---TTT-----  
-----GAT---GGA---

AATGAGGGAATGTTTACAATACCTGGATTTAGTCAGATCCAATTTGAGGGATTTTGTAGGTTTATTGATCAGGGCTTGAT  
GGAAGAATTTTCATAAGTTTTCCAAAAATTGAA-----  
GATACAGACCAAGAAATTGAATTTCAATTATTTGTGGAAAGATATCAATTTGGTAGAACCTTTGATAAAAAGAAAGAGATGC  
TGTATATGAATCACTC---ACATATTCCTCGGAATTATATGTACCCGCGGGATTAATTTGGAAAACC-----  
GGTAGAGATATGCAAGAACAAACCATATTTATTGGAAACATTCCTCTAATGAATTCCTGGGAACCTTTATAGTAAATGG  
AATATACAGAATTGTAATCAATCAAATATTGCAAAGCCCCGGTATTTACTACCGTTTCAAGATTGGACCAT---AACGGA--  
--ATTTCT---  
GTTTATACCAGTACCATAATATCAGATTGGGGAGGAAGATCAGAATTAGAAATCGATAGAAAATCAAGGATATGGGCCCG  
TGTGAGTAGGAAACAAAAAATATCTATTCTAGTTTTATCATCAGCTATGGGTTTCAAGTCTAAGAGAAATTTCTAGATAATG  
TTTGCTACCCCGAAATTTTCTTGTCTTTTCTGAATGATAGGGAG-----  
AAAAAAAAGATTTGGGTCAAAAGAAAATGCCATTTTGGAAATTTTATCAACAATTT-----GCTTGTGTAGGTGGAGAT--  
-CCGGTATTT---  
TCTGAATCCTTTATGTAAGAATTACAAAAGAAATTTTTTCAACAAAGATGTGAATTAGGAAGGATTGGACGACGAAATAT  
GAACCGGAGATTAATCTTGATATACCTCAGAGCAATACATTTTTTGTACCACGAGATGTATTGGCTGCCGCGGATCATT  
TGATCGGAATGAAATTTGGAATGGGTACACTTGACGAT-----  
ATGAATCACTTGAAAAATAAACGTATTCGTTCTGTAGCAGATCTGTTACAGGATCAATTCGGCTTGGCTCTTGTTCGTTT  
AGAAAATGCAGTTCGAGGAACATATGTGGAGCAATCAGGCATAAATTGATACTGACTCCT-----  
CAAAATTTGGTCAGTTCAACTTCA-----  
TTAACAACCACTTATGAATCGTTTTTTCGGCCTACACCCTTTATCTCAAGTTTTGGATCGAACTAATCCATTGACGCAAT  
CGTTCATGGGCGAAAATTTGAGTTATTTGGGTCTGGAGGATTGACAGGGCGAACTGCTAGTTTTTCAATACGAGATATCC  
ATCCTAGTCACTATGGACGGATTTGCCCAATTGACACGTCCGAAGGAATCAATGTTGGACTTATTGGATCCTTAGCTATT  
CATGCCAGGATTGGTCAT---TGGGGGTCTATAGAGAGTCCGTTTTATGAA-----GTATAT---CAGAGATCAAAA--  
-----GAGACAAAGATGGTTTTTTTTATCACCAAGTAGA-----GATGAATATTAT-----  
ACGGTAGCGACAGGAAATTTCTTTGGCTTTGAATCGAGGTGGTATTCAGGAAGAACAGATTGTTCCC---  
GCCCCGATACCGTCAAGAATTCCTGACTATTGCATGGGAACAGATTCATCTTCGAAGTATTTTTCCCTTCCAATATTTTTTC  
TATTGGAGCTTCCCTGATTCCGTTTTATCGAGCATAATGATGCGAATCGGGCTTTAATGAGTTCGAATATGCAGCGTCAAG  
CAGTTCGCTTTCCCGGTCCGAGAAGTGCATTGTTGGGACTGGATTGGAACGACAAGCGGCTCTGGATTCCGGGGTTTTCA  
GCTATAGCCGAATGCGAGGGAAAGATTATTCATACCGATACTCATAAGATCGTTTTTATCAGGTCATGGA---GAC-----  
-----ACT-----  
ATAAGCATTCCATTGGTTATGTATCAACGTTTCAACAAAAATACTTGTATGCATCAAAATCCTCAGGTTCCGGCGGGGG--  
----  
AAATGCATTAAAAAAGGACAAATTTTAGCGGATGGTGC GGCTACAGTTGGTGGCGAACTCGCTTTAGGAAAAAACGTATT  
AGTAGCTTATATGCCATGGGAAGGTTACAATTTTGGAGACGCGGTACTCATTAGCGAACGTCTGGTATATGAAGATATTT  
ATACTTCTTTTACATCCGTAAATATGAAATTCAGACTCATGTGACAAGCCAGGGT---CCT---  
GAAAGAATTACTCATGAAATACCGCATTTGGAAGCTCATTTACTCCGCAATTTAGACAGAAATGGAATTGTGGCGCTGGG  
ATCTTGGGTAGAAACAGGCGATATTTTAGTAGGTAATTAACCCCTCAGACAGCTAACGAA---  
TCATCGTATGCCCCGGAAGATAGATTATTACGAGCCATACTTGGGATTCCAGGTATCCACTGCAAAAGAAACTTGTCTAAA  
ACTACCTATAGGCGGAAGGGGTGAGTTATTGATGTGAGATGGATCCAGAAA---  
AAGGGAGGTTCCAGCTATAATCCAGAAACGATT---  
CGTGTATATATTTACAGAAACGTGAAATCAAAGTGGGTGATAAAGTAGCTGGAAGACACGGGAATAAAGGTATCATTTT  
CAAAATTTTATCTAGACAAGATATGCCTTATTTGCAAGATGGAACGCCGGTTGATATGGTTTTCAACCCATTAGGAGTAC  
CTTACGAATGAATGTGGGACAAATATTTGAATGCTCGCTCGGGTTAGCGGGGGACCTGCTAGACAGACATTATAGAATA  
GCACCTTTTGTAGAGATATGAGCAAGAGGCTTCGAGAAAACCTAGTGTCTTCTGAATTATATGAAGCCAGTAAGCAAC  
AGCAAAT---  
CCATGGGTATTTGAACCCGAATATCCCGGAAAAAGCAGAATATTTGATGGAAGAACGGGAGATCCTTTTGAACAGCCTGT  
TCTAATAGGAAAGTCTATATCTGAAATTAATTCATCAAGTTGACGATAAAAATCCACGGTCGTTCCAGTGGACATTACG  
CACTTGTACACAACAACCTCTTAGAGGAAGGGCCAAACAGGGCGGACAGCGCTAGGAGAAATGGAAGTTTGGGCTCTC  
GAAGGGTTTTGGTGTGCTCATATTTTACAAGAGATGCTTACTTATAAATCTGATCATATTAGAGCTCGTCAGGAAGTACT  
TGGTACTACAATCATTGGAGGAACAATACCTACCCCGAG-----  
GATGCTCCAGAATCTTTTCGATTGCTCGTTTCGCAATTACGATCTTTGGCTTTGGAAGTGAATCATTTCCTTGTATCT--  
----GAGAAGAACTTC-----CAGATTAAT-----AGGAAGGAAGCT-----  
ATGAATCCGAATTTTTTCTTCTATGATCGACCGGTAT-----  
AAACATCAACAACCTTCAAATTTGGATCAGTTTTCTCTCAACAAATAAGTGCTTGGGCCAACAAAATCCTACCTAATGGAGA  
GATAGTTGGAGAGGTCACAAAACCTATACTTTTCATTAC-----  
AAAACCAATAAACCGGAAAAAGATGGATTATTTTGTGAAAGAATCTTTGGACCTATAAAAAGTGAATTTGCGCTTGTGG  
AAATTAT-----CGAGTAATTGGCGCTGAAAAAGAA---  
GACCCCAAATTTTGTGAACAATGTGGAGTCGAATTTATTGATTCTCGGATACGAAGATATCAAATGGGATACATCAAGCT



CGCATGTCCAGTGACTCATGTGTGGTATTTGAAACGTCTTCTAGTTATATCGCGAATCTTTTAGATAAACCCCTTAAGG  
AATTAGAAGGCCTAGTATACTGCGATGTGTTTGATCGA---  
TATCCCTATTTTTCTTTTGCTAGGCCCATAGCTAAAAAACCGACT---TTCTTACGATTACGAGGT---  
TTATTCGAATAT-----GAAATCCAATCCTGGAAATACAGCATCCCCCTTTTTTTTACTACC-----  
-----  
CAAGGCTTCGATACATTTTCGAAATAGAGAAATCTCTACCGGAGCGGGTGCTATCAGGGAACAATTAGCCGATTTGGATTT  
GCGAATTGTTATCGATAATTCATCGGTAGAATGGAAGGACTTAGGAGAC-----  
GAAGGG-----TCCACT-----GGG-----AATGAA-----TGGGAAGATAGAAAAATTGGA-----  
-----  
CGAAGAAAGGATTTTTTAGTTAGACGCATGGAATTAGCTAAACATTTTATTCGAACAAATGTAGAACCAGAGCGGATGGT  
TTTGTGCCTATT  
Amborella  
CTTTTTCTAGAGATATGGACAAATGGAAGTTAACTCCTAAAGAGGCACCTTTACGAAGCTTCCCGTAATTTGATCGATTT  
ATTTATTCCTTTTCTACATGCGGAGGAG-----CGGGACCTCCAT-----TTAGATGACGATCAA---  
AACATATTTACTGCGCCTTTTTTCCCTTTCATGAGGGG-----TTGGCT-----  
TATATAGGGATAGGGGAAAGCAAAAAAGAATTGCATTGAAACGTATTTTTATTGACCAATTAGAATTATCTCCCAGGAC  
CTATAACTGCCTCAAAGGTCCAATATCCATACATTATTGGACCTTTTGAGTAAGAGTCAAGAAGATCTTAGGAAAATTC  
AACATTTTCGTGTAGAGGATGTCAAACGGGTATTGGACATTCTC-----AAGAAACGTTTTGCA---ATGAAT-----  
-----  
-----ATGCTACGGGAT---GGA---  
AATGAGGGAATGTCTACAATACCTGGATTTAGTCAGATACAATTTGAAGGATTTTGTAGGTTTCGTTGATCAGGGCTTGGC  
AGAAGAACTTCATAAGTTTTCCAAAAATTGAA-----  
GATACAGATCAAGAAATTGAATTTCAATTACTTGTGGAAACATATCAATTGGCGGAACCCCTTGATAAAAGAAAGAGATGC  
TGTGTATGAATCACTC---ACACATTCCTCTGAATTATATGTACCCGCGGGGTTAATTTGGAAAGTT-----  
GGTAGAGATATGCAAGAACAACCGTGTATTGGAAACATTCCTCTAATGAATTCTCTGGGAACCTTTATAGTAAATGG  
AATATACAGAATTGTGATCAATCAAATATTGCAAAGCCCCGGTATTTATTACAGTTTCAAGATTGGACCAT---AACGGG-  
--ATTTCT---  
GTTTATACCGGCACCATAATATCAGATCGGGGAGGAAGATCAGAATTAGAGATTGATAGAAAAGCAAGGATATGGCCCCG  
TGTGAGCAGGAAACAAAAAATTTCTATTCTAGTTCTACCATCAGCTATGGGTTTCGAATCTAAGAGAAATTTCTAGACAATG  
TTTGCTACCCCGAAATTTTATTGTATTTCCCGAATGAGAAAGAG-----  
AAAAAGAAAATTTGGGTCGAAGGAAAATGCTATTTTGGAGTTTTATCAACAATTT-----TCTTGTGTAGGCGGGGAT--  
-CCGGTATTT---  
TCTGAGTCCCTCTGTAAGGAATTACAAAAGAGATTTTTTCAACAAAGATGTGAATTAGGAAGGATTGGTTCGACAAAATAT  
GAACCAGAGATTGAATATTGATATACCCCAAGCAATACATTTTTATTACCACGAGACGTATTGGCTGCTACAGATCATT  
TGATCGGAATGAAATTTGGAATGGGTACACTTGACGAT-----  
ATGAATCACTTGAAAAATAAACGTATTCGTTCTGTAGCAGATCTGTTACAGGATCAATTCGGATTGGCTCTGGTTCGTTT  
GGAAAATGTGGTTCGAGGAACATATGTGGAGCAATCAGGCATAAATTTATACCGACTCTC-----  
CAAACTTGGTAACCTTCAACTCCA-----  
TTAACAACCCTTATGAATCGTTTTTTCGGTCTACACCCTTTATCTCAAGTTTTGGATCGAACTAATCCATTGACACAGAT  
AGTTCATGGGCGAAAATCAAGCTATTTGGGTCCCGGAGGATTAACAGGGCGAACTGCTAGTTTTCGCATACGAGATATCC  
ATCCTAGTCACTATGGACGATTTGCCCAATTGACACGTCCGAAGGAATCAATGTTGGACTTATCGGATCCTTAGCTATT  
CATGCAAGGATCGGCGAT---TGGGGATCTATACGAAGTCCGTTTTATGAA-----ATATCT---GAGAGATCAAAA--  
-----GAGGAACAGATGGTTTTATTTATCACCAGGAGA-----  
GATGAATACTATATGGTAATGGTAGCAGCAGGAAATCTTTGGCCTTGAATCAGGAT---  
ATTCAGACGAACAGGTCGTTCCA---  
GCCCCATACCGTCAAGAATTCGTGACTATTGCATGGGAACATATTGATCTTCGAAGCATTATCCCTCCAATATTTTTCT  
TATTGGAGCTTCCCTCATTCCGTTTTATCGAACACAATGATGCGAATCGAGCTTTAATGAGTTCTAATATGCAGCGTCAAG  
CAGTTCCGCTTTCTCGGTCCGAGAAATGCATTGTTGGAAGTGGGTTGGAGCGCCAAGCGGCTTTAGATTCCGGGGGTTCA  
GCTATAGCCCAACACGAGGGAAAGGTCATTTATACCGATACTGAAAAGATCCTTTTATCAGGGAATGGA---GAC-----  
-----ACT-----  
ATAAGCATTCCATTGCTTATGTATCAGCGTTCCAACAAAAATACTTGTATGCATCAAAAACCTCAGGTTTCATCGGGAT--  
-----  
AAATATGTTAAAAAGGGACAAGTCTTGGCGGATGGTGC GGCTACAGTTGGTGGGGAACCTCGCTTTGGGAAAAAACGTATT  
AGTAGCTCATATGCCATGGGAAGGCTACAATTTGAAGATGCAGTACTAATTAGCGAACGTCTGGTATATGGAGATATTT  
ATACTTCGTTTTACATCCGAAATATGAGATTCACTCATGTGACAAGCCACGGC---CCT---  
GAAAAGATCACTAACGAAATACCTCATTTAGAAGCTCATTGCTCCGTAATTTAGACAGAAATGGAATTGTGATGCTCGG  
ATCTTGGGTGGAACGGGTGATGTTTTAGTAGGTAATTGACGCCTCAGACAGCGAAAGAA---

TCATCGTATGCCCCGGAAGATAGATTATTACGAGTCATACTTGGAAATTCAGTATCCACTGCAAAGGAACTTGTCTAAA  
ACTACCTATAGGTGGAAGAGGTTCGAGTTATTGATGTGAGATGGATCCAGAAA---  
AAAGGGGCTTCCAGTTATAATCCAGAAAAAATT---  
CGTGTATATATTTTACAGAAACGTGAAATCAAAGTGGGTGATAAAGTCGCCGGAAGACATGGCAATAAGGGTATCATTTC  
CAAAATTTTGCCTAGACAAGATATGCCTTATTTGCAAGATGGAACACCAGTTGATATGGTCTTCAACCCATTAGGAGTAC  
CTTCACGAATGAATGTGGGACAGATCTTTGAATGCTCGCTGGGGTTAGCGGGGAGATCTGCTGGACAGACATTATAGAATA  
ACACCCTTTGATGAGAGATATGAGCAAGAGGCTTCGAGAAAAGTAGTGTTCCTGAATTATATGAAGCCAGTAAGCGAAC  
AGCAAAT---  
CCATGGGTATTTGAACCCGAGTATCCTGGAAAAAGCAGAATATTTGATGGAAGAACAGGAGATCCTTTTGAACAACCTGT  
TATAATAGGAAAGTCTTATATGCTGAAATTAATTCATCAAGTAGATGATAAAATCCATGGACGTTCCAGTGGACATTATG  
CACTTGTACACAACAACCCCTTAGAGGAAGGGCCAAGCAAGGGGGCAACGAGTAGGAGAAATGGAAGTCTGGGCTCTA  
GAGGGATTTGGTGTGCTCATATTTTACAAGAGATGCTTACTTATAAATCCGACCATATTAGAGCTCGTCAGGAACTACT  
TGGTACCACGATCGTTGGAGGAACAATACCTAAGCCTGAG-----  
GGTGTCCAGAATCTTTTCGATTGCTCGTTTCGAGAAGTACGATCTTTGGCTCTGGAAGTGAAGCATTTCCTTGTATCT--  
----GAGAAGAACTTC-----CAGATTAAT-----AGGAAGGAAGCT-----  
ATGATCGACCGATAT-----  
AAACATCAACAACCTTCGAATTGGATTAGTTTTCTCCTCAACAAATAACTGCTTGGGCCAACAAAATCCTACCTAATGGAGA  
GATGGTTGGAGAAGTGACAAAACCTATACTTTTCATTAC-----  
AAAAGCAATAAACCGGAAAAAGATGGATTGTTTTGTGAAAGAATCTTTGGGCCTATCAAAGTGAATTTGTGCTTGTGG  
AAATTAC-----CGAGTCATCGGGGATGAAAAAGAA---  
GACCCGAAATTTTGTGAACAATGCGGAGTCAATCTGTTGATTCTCGGATACGAAGATATCAAATGGGATACATCAAAC  
GGCATGTCCAGTACTCATGTGTGGTATTTGAAACGCTTCCCAGTTATATCGCGAATCTTTCAGATAGACCTCTTAAAG  
AATTAGAAGGCTGGTATACTGCGAT-----  
TTCTCTTTTGTAGGCCCATAGCTAAAAAACCCACT---TTCTTACGATTACGAGGT---TCATTGCAATAT-----  
-GAAATCCAATCCCGGAAATACAGCATCCCACTTTTTTTTACTACC-----  
CAATGCTTCAATCTATTTAGAAATAGAGAAATATCTACTGGAGCAGGTGCTATCAGAGAACAATTAGCCGACCCGGATTT  
GCGAATTATTACAGATCGTTTTCATTGGTAGAATGGAAGGAATTGGGGGAA-----  
GAAAGA-----TCCGCT-----GAG-----AATGAA-----TGGGAAGATAAAAAAATCGTA-----  
-----

AGAAGAAAGGATTTTTTGGTTAGACGCATGGAATTGGCTAAGCATCTTCTTAGAACAAATGTAGAACCAGAACGGATGGT  
TTTGTGCCTATT

Arabidopsis

CTTTTTCTAGAAATATGGACAAATGGAAGTTAACTCCTAAAGAAGCACTTCATCAAGCCTCCCGGAATTTGATTAATTT  
ATTTATTCCTTTTCTACATGTAGAAGAA-----GAAACGTTCTAT-----TTAGAGAACAATCAA---  
CATCAAGTTACTTTACCCTTTTTTCTTTTTCATAATCGA-----TTAGTT-----  
AACCTAAGAAAAAAAAAAAAAAAAACAAAAGAAGTACGCTTTCAATATATTTTTATTGACCAATTAGAATTGCCTCCAGAA  
CTACAATTGTCTCAAAAAATCCAATATACATACATTATTGGACCTTTTGAATAACAGTCAAGAAGACCTTATCAAAATTTG  
AACATTTTACGTTAGAAGATGTAAAAAAGATATTAGACATTCTA-----GAAAAAAA-----  
-----  
-----ATGCTTGGGGAT---GAA---  
AAAGAGGGAAACATCTGCAATACCCGGATTTAATCAGATACAATTTGAAGGGTTTTATCGGTTTTATTGATCAGGGTTTTAAT  
AGAAGAAGCTTGCTAAGTTTCCAAAAATTGAA-----  
GATATAGATCACGAAATTGAATTTCAATTATTTGTGGAAACATATCAATTGGTAGAACCCTCTGATAAAAAGAACGAGATGC  
TGTCTATGAATCACTT---ACATATTCTTCTGAATTATATGTATCCGCGGGATTAATTTGGAAAACC-----  
AGTAGGAATATGCAAGAACAAGAATTTTTATTGGAAACATTCCTTTAATGAATTCCTTGGAACTTCTATAGTAAACGG  
AATTTACCGAATTGTGATCAATCAAATATTGCAAAGTCCCGGTATCTATTACCAGTCAGAATTGGATCAT---AATGGG-  
---ATTTTCG---  
GTCTATACCGGCACCATAATATCAGATTGGGGAGGCAGGTTAGAATTAGAGATTGATAAAAAAGCAAGAATATGGGCTCG  
GGTGTAGTAGGAAACAAAAAATATCTATTCTAGTTCTATCATCAGCTATGGGTTTGAATCTACGAGAAATTTAGAGAATG  
TTTGCTACCCTGAAATTTTCTTATCTTTCTTGACCGATAAGGAG-----  
AAAAAAAAAATAGGATCAAAAGAAAATGCTATTTTGGAGTTTTATCAACAATTT-----TCTTGTGTAGGTGGGGAT--  
-CCTATATTT---  
TCTGAATCCTTATGTAAGGAATTACAAAAAATTTCTTTACCAAAGGTGTGAATTAGGAAGGATTGGTCCGCCAAATAT  
TAATTGGAGACTGAATCTTAATATACCTCAGAACAATATATTTTTGTTACCACGAGATGTGTTAGCAGCTGCCGATCATT  
TGATTGGGATGAAATTTGGAATGGGTACACTTGATGAT-----  
ATGAATCATTGAAAAATAAACGTATTCGCTCTGTAGCGGATCTTTTACAAGACCAGCTCGGGTTGGCTCTGGCTCGTTT  
AGAAAATGTAGTTAAGGGAAGTATCTCCGAGCAATTAGGCATAAATTGATACCTACTCT-----

CAGAATTTGGTAACTTCAACTCCG-----  
TTAACAACTACTTATGAATCCTTTTTTCGGATTACACCCATTATCTCAAGTTTTGGATCGAACAAATCCATTGACACAAAT  
CGTTCATGGGAGAAAATTGAGTTATTTGGGCCCTGGCGGATTAACAGGGCGAACTGCTAATTTTTCGGATACGAGATATCC  
ATCCTAGTCACTATGGGCGTATTTGTCCCATTGACACGTCTGAAGGAATCAATGTTGGACTTATTGGATCTTTATCAATT  
CATGCCAGGATTGGTGAT---TGGGGGTCGTTAGAAAAGTCCATTTTATGAA-----CTCTTT---  
GAGAAATCAAAAAAGCA---CGGATACGGATGCTTTTTTTATCACCAAGTCAA-----GATGAATATTAT-----  
ATGATAGCGGCAGGAAATCTTTGGCTCTTAATCGGGGC---ATTCAAGAAGAACAGGCTGTTCCA---  
GCTCGATACCGCCAAGAATTTTTGACTATCGCATGGGAAGAGGTTTCATCTTCGAAGCATTTCCTTTCCAATATTTTTTC  
CATTGGAGCTTCTCTAATTCCTTTTTATCGAACATAATGATGCGAATCGAGCTTTAATGAGTTCTAATATGCAACGTCAAG  
CAGTTCCTACTTTCTCGGTCCGAAAAGTGCATTGTTGGAACGGGTTGGAACGCCAAGTGGCTTTAGATTCCAGGGGTTCCC  
GCTATAGCCGAACACGAGGGAAAAATCCTTTATACTGACACTGAGAAGATCGTTTTTTTCGGGCAATGGT---GAT-----  
-----ACT-----  
CTAAGCATTCCATTAATTATGTATCAACGCTCAAACAAAAATACTTGTATGCATCAAAAACCTCAGGTTTCGTCGGGGT--  
----

AAATGCATTAAAAAGGGACAAATTTTAGCGGATGGTGCTGCTACAGTTGGTGGGGAACCTCGCTTTGGGGAAAAATATATT  
AGTGGCTTATATGCCATGGGAAGGATACAATTTGAAGATGCGGTACTCATTAGTGAGTGTCTAGTATATGGTGATATTT  
ATACTTCTTTCCACATACGGAAATATGAAATTCAGACGCATGTGACAACCCAAGGT---CCT---  
GAAAGGATCACTAAAGAAATACCGCATCTAGAAGGTGCTTTACTCCGAAATTTAGACAAAAATGGAATTGTGATGCTAGG  
ATCGTGGGTTGAAACAGGTGATATTTTAGTAGGTAATTAACACCTCAAGTGGCGAAAGAA---  
TCCTCCTATGCTCCGGAAGATAGGTTATTACGAGCTATACTTGGCATTTCAGGTATCGACTTCAAAGAAACTTGTTTAAA  
ATTGCCTATAGGTGGTAGAGGTTCGAGTTATTGATGTGAGGTGGGTTTCAGAAA---  
AAGGGTGGTTCAAGTTATAACCCAGAAATAATT---  
CGTGTATATATTTACAGAAACGTGAAATAAAAGTAGGTGATAAAGTAGCTGGAAGACATGGAAATAAAGGTATCATTTC  
AAAAATTTTGCCTAGACAGGATATGCCTTATTTGCAAGACGGGAGACCCGTTGGATATGGTCTTCAACCCATTAGGAGTAC  
CCTCACGCATGAATGTAGGACAGATATTTGAATGCTCGCTTGGGTTAGCGGGAAAGTCTGCTAGATAGACATTATCGAATA  
GCCCCTTTTGATGAGAGATATGAACAAGAGGCTTCGAGAAAACCTGGTGTTTTCAGAATTATATGAAGCCAGTAAGCAAAC  
AGCGAAT---

CCATGGGTATTTGAACCCGAGTATCCAGGAAAAAGCCGCATTTTTGATGGAAGAACAGGAGATCCTTTTGAACAGCCTGT  
GATAATAGGAAAGCCCTATATCTTGAATTAATTCATCAGGTTGATGATAAAATACACGGACGTTCTAGTGGACATTATG  
CACTTGTACACAACAACCCCTTAGAGGCCGTTCCAAGCAGGGGGGGCAGCGGGTAGGCGAAATGGAGGTTTGGGCTCTG  
GAGGGGTTTGGTGTGCTCATATTTTACAAGAGATGCTTACTTATAAATCTGATCATATTAGAGCTCGCCAAGAAGTACT  
TGGTACCCTATCATTGGAGGAACAATACCTAAACCGAA-----  
GATGCTCCGGAATCTTTTCGATTACTTGTTCGAGAACTACGATCTTTGGCTCTGGAACCTGAATCATTTTCCTTGTATCT--  
----GAGAAGAATTC-----CAGATTAAT-----AGGAAGGAAGTT-----  
ATGATCGATCGGTAT-----

AAACATCAACAACCTCCGAATTGGCTTAGTTTTCTCCTCAGCAAATAAGTGCTTGGGCCACTAAAATAATACCTAATGGAGA  
GATAGTTGGAGAGGTGACAAAACCTATACTTTTCATTAC-----  
AAAACCAATAAACCGGAAAAAGATGGATTATTTGTGAAAGGATTTTTGGACCTATAAAGAGTGAATTTGCGCTTGTGG  
AAATTAT-----CGAGTGATCGGAGATGAAAAAGAA---  
GACCCAAAGTTTTGTGAACAATGTGGAGTTGAATTTGTTGATTCTCGGATACGAAGATATCAAATGGGATACATAAAACT  
GACATGTCCTGTAACCTCATGTATGGTATTTGAAACGTCTTCTAGTTATATTGCGAATCTTTTAGATAAACCTCTTAAAG  
AATTAGAAGGCCTAGTATACTGCGAT-----  
TTTTCTTTTGTAGGCCATAACTAAAAACCTACT---TTCTTACGATTACGAGGT---TCATTTGAATAT-----  
-GAAATTCATCCTGGAAATACAGCATCCCACTTTTTTTTACTACT-----  
CAAGGTTTCGATATATTTGAAATCGAGAAATTTCTACTGGGGCGGGTGCTATCCGAGAACAATTAGCCGATTTAGATTT  
GCGAATTATTATAGAAAATTCGTTGGTAGAATGGAACAATTAGGAGAA-----  
GAAGGG-----CCTACG-----GGG-----AATGAA-----TGGGAAGATCGAAAAATTGTA-----  
----

AGAAGAAAAGATTTTTTAGTTAGACGTATGGAATTAGCTAAGCATTTTTATTGAAACAAATATAGAACCCGAATGGATGGT  
TTTATGTCTCTT

Atropa

CTTTTTCTTGAATATGGACAAACGGAAGTTAACTCCGAAAGAAGCACTTCATGAAGCATCCCGAAATTTAATTGATTT  
ATTTATTCCTTTTTACATATGGAGGAA-----GACAACCTTATAT-----TTACAGGACAATCAA---  
CACACGGTTCCTTTTATCCCCTTTTACCTTTTCATGATAAA-----TTGGCT-----AAACTCATA-----  
AAAAACAACAAAAAATAGCATTGAAATCGATTTTTATTGACCAATCAGAATTGCCTTCCAGGATCTATAATTGCCTCAA  
AATGTCCAATATATATACATTATTGGACCTTTTGAATAACAGCCAAGAAGATCTTATGAAAATTGAACATTTTCGTAGCG  
AAGATATAAAACAGATATTGGGCATTTTA-----GAAAAATATTTTCGTA---ATTGATTTAGCAAAAAATAAG-----

---TTT-----  
-----ATGCTCGGGGAT---GGA---  
AATGAGGGAATATCTACAATACCTGGATTTAATCAGATACAATTTGAAGGATTTTGTAGGTTTCATTGATCAAGGTTTGAC  
GGAAGAACCTTTATAAGTTTTCCAAAAATTGAA-----  
GATACAGATCAAGAAATTGAATTCCAATTATTTGTGGAAACATATCAATTGGTCGAACCCCTTGATAAAGGAAAGAGATGC  
TGTGTATGAATCACTC---ACATATTCTTCTGAATTATATGTATCCGCGGGATTAATTTGGAAAAAC-----  
AGTAGGGATATGCAAGAACAACAATTTTTATCGGAAACATTCCCTCTAATGAATTCCTGGGAACCTTCTATAGTCAATGG  
AATATATAGAATTGTGATCAATCAAATATTGCAAAGTCCCGGTATTTATTACCGATCAGAATTGGACCAT---AACGGA-  
--ATTTCG---  
GTCTATACCGGCACCATAATATCAGATTGGGGAGGAAGATCAGAATTAGAAATTGATAGAAAAGCAAGGATATGGGCTCG  
TGTAAGTAGGAAACAACAAAAATATCTATTCTAGTTCTATCATCAGCTATGGGTTTGAATCTAAGAGAAATTTTAGAGAATG  
TTTGCTATCCTGAAATTTTTTGTCTTTTCTGAGTGATAAGGAG-----  
AGAAAAAAATTTGGGTCAAAAGAAAATGCCATTTTGGAGTTTTATCAACAATTT-----GCTTGTGTAAGCGGCGAT--  
-CCGGTATTT---  
TCTGAATCCTTATGTAAGGAATTACAAAAGAAATCTTTCAACAAAGATGTGAATTAGGAAGGATTGGTCGACGAAATAT  
GAACCGAAGACTTAACCTTGATATACCCCAGAACAATACATTTTTGTTACCACGAGATATATTGGCAGCCGCCGATCATT  
TGATTGGGCTGAAATTTGGAATGGGTGCACCTTGACGAT-----  
ATGAATCATTGAAAAATAAGCGTATTCGTTCTGTAGCAGATCTTTTACAAGATCAATTCGGATTGGCTCTGGTTCGTTT  
AGAAAATGTGGTTCGGGGGACTATATGTGGAGCAATTCGGCATAAATTGATACCGACACT-----  
CAGAATTTGGTAACCTCAACTCCA-----  
TTAACAACACTACTTATGAATCCTTTTTCGGTTTACACCCATTATCTCAAGTTTTGGATCGAACTAATCCATTGACACAAAT  
AGTTCATGGGAGAAAATTAAGTTATTTGGGCCCTGGAGGACTGACAGGGCGCACTGCTAGTTTTCGGATACGAGATATCC  
ATCCTAGTCACTATGGACGATTTGCCCAATTGACACATCTGAAGGAATCAATGTTGGACTTATTGGATCCTTAGCAATT  
CATGCGAGGATTGGTCAT---TGGGGATCTCTAGAAAGCCCCTTTTATGAA-----ATTTCT---GAGAGGTCAACC--  
-----GGGGTACGGATGCTTTATTTATCACCAGGTAGA-----GATGAATACTAT-----  
ATGGTAGCGGCAGGAAATCTTTAGCCTTAAATCGGGAT---ATTCAGGAAGAACAGGTTGTTCCA---  
GCTCGATACCGTCAAGAATCTTGACTATTGCATGGGAACAGGTTTCATCTTCGAAGTATTTTTCTTTTTCAATATTTTTTC  
TATTGGAGCTTCCCTCATTCTTTTTATCGAACATAATGATGCGAATCGAGCTTTAATGAGTTCTAATATGCAACGTC AAG  
CAGTTCTCTTTCTCGCTCCGAGAAATGCATTGTTGGAACCTGGGTTGGAACGACAAGCAGCTCTAGATTCGGGGGCTCTT  
GCTATAGCCGAACGCGAGGGGAGGGTCGTTTATACCAATACTGACAAGATTCTTTTAGCAGGTAATGGA---GAT-----  
-----ATT-----  
CTAAGCATTCCATTAGTTATATATCAACGTTCCAATAAAAATACTTGTATGCATCAAAAACCTCCAGGTTCCCTCGGGGT--  
----  
AAATGCATTAAAAAGGGACAAATTTTAGCGGATGGTGCTGCTACGGTTGGTGGCGAACTTGCTTTGGGGAAAAACGTATT  
AGTAGCTTATATGCCGTGGGAGGGTTACAATTCTGAGGATGCAGTACTTATTAGCGAGCGTTTTGGTATATGAAGATATTT  
ATACTTCTTTCCACATACGGAAATATGAAATTCAGACTCATGTGACAAGCCAAGGC---CCT---  
GAAAAAGTAACTAATGAAATACCGCATTTAGAAGCCCATTACTCCGCAATTTAGACAAAAATGGAATTGTGATGCTGGG  
ATCTTGGGTAGAGACGGGTGATATTTTAGTAGGTAATTAACACCCCAGGTCGTGAAAGAA---  
TCGTGATGCCCCGGAAGATAGATTGTTACGAGCTATACTTGGTATTACAGGTATCTACTTCAAAGAAACTTGTTTTAAA  
ATTACCTATAGGTGGTAGGGGTCGGGTTATTGATGTGAGGTGGATCCAGAAA---  
AGGGGTGGTTCTAGTTATAATCCCGAAACGATT---  
CGTGTATATATTTACAGAAACGTGAAATCAAAGTAGGCGATAAGGTGGCTGGAAGACACGGAAATAAAGGTATCATTTC  
CAAAATTTTGCCTAGACAAGATATGCCTTATTTACAAGATGGAAGATCCGTTGATATGGTCTTTAACCATTAGGAGTAC  
CTTACGAATGAATGTAGGACAGATATTTGAATGTTCACTAGGGTTAGCAGGGAGTCTGCTAGACAGACATTATCGAATA  
GCACCTTTTGATGAGAGATATGAACAAGAAGCTTCGAGAAAACCTAGTGTCTTCTGAATTATATGAAGCCAGTAAGCAAAC  
AGCAAAT---  
CCATGGGTATTTGAACCCGAATATCCAGGAAAAAGCAGAATATTTGATGGAAGGACGGGGAATCCTTTTTGAACAACCCGT  
TATAATAGGAAAGCCTTATATCTTGAATTAATTCATCAAGTTGATGATAAAATCCATGGGCGTTCCAGTGGACATTATG  
CGCTTGTTACACAACAACCCCTTAGAGGAAGAGCCAAACAGGGGGGACAGCGGGTAGGAGAAATGGAGGTTTGGGCTCTA  
GAAGGGTTTGGGGTGTCTCATATTTTACAAGAGATGCTTACTTATAAATCGGATCATATTAGAGCTCGCCAGGAAGTACT  
TGGTACTACGATCATTGGGGGAACAATACCTAATCCCGAA-----  
GATGCTCCAGAATCTTTTCGATTGCTCGTTCGAGAACTACGATCTTTAGCTCTGGAACCTGAATCATTTCCTTGTATCT--  
---GAGAAGAACTTC-----CAGATTAAT-----AGGAAGGAAGCT-----  
ATGATCGATCGATAT-----  
AAACATCAACAGCTCCGAATTGGATCAGTTTCTCCTCAACAAATAAGTGCTTGGGCCACTAAAATCCTGCCTAATGGAGA  
GATAGTTGGAGAGGTAACAAAACCTATACTTTTCATTAC-----  
AAAACATAAACCAGGAAAAAGATGATTATTTTGTGAAAGAATTTTTGGTCTATAAAAAGCGGAATTTGTGCTTGTGG

AAATTAT-----CGAGTAATCGGAGATGAAAAAGAA---  
GACCCGAAATTTTGTGAACAATGCGGAGTCTGAATTTGTTGATTCTCGGATACGAAGGTATCAAATGGGCTATATCAAAC  
CGCATGCCAGTAACCCATGTGTGGTATTTAAAACGTCTTCTAGTTATATTGCGAATCTTTTAGATAAACCTCTTAAAG  
AATTAGAAGGCCTAGTATACTGCGAT-----  
TTTTCTTTTGTAGGCCATAACTAAAAACCCACT---TTCTTACGATTACGAGGT---TTATTTGAATAT-----  
-GAAATCCAATCTTGGAAATACAGCATCCCGCTTTTTTTTACTACC-----  
CAGGGTTTCGATACATTTTGAAATCGAGAAATCTCTACTGGCGCAGGTGCTATCCGAGAACAATTAGCCGATCTAGATTT  
ACGAATTATTATAGAGAATTCATTGGTAGAATGGGAAGAATTGGGGGAA-----  
GAAGGG-----CACACA-----GGG-----AATGAA-----TGGGAAGATCGAAAAGTTGGA-----  
-----  
AGAAGAAAGGACTTTTTGGTTAGACGCGTGAATTGGCTAAGCATTTTATTTCGAACAAATATAGAGCCAGAATGGATGGT  
TTTGTGTCTATT

Buxus

CTTTTTCTCGAAATATGGACGAATGGAAGTTAACTCCTAAAGAAGCACTTCACGAAGCCTCCCGGAATTTGATTGATTT  
ATTTATTCTTTTCTACATGCGAACGAA-----GAAAACCTTTATT-----TTAAAGGACAATCAA---  
AACAAGGTAGCTTTACCCCTTTTTACCTTTCATGATAGA-----TTGGCT-----AAACAAAGG-----  
AAAAACAAAAAAGAAATATCATTTCATGTATTTTTATTGACCAATCAGAATTGCCTCCCGGACCTATAATTGCCTCAA  
AAGGTCCAATATACATACATTATTGGACCTTTTGAATAACAGTCAAGAAGATCTTATGAAAATTGAACATTTTCGCATAG  
AAGATGTAAAGCAGATATTGGGCATTCTA-----CAAAAGCATTTCGCA---ATTGATTTACCGAAGAAT---  
AAGTTT-----  
-----ATGATCCGGGAT---GGA---  
AATGAGGAAATGTCTACAATACCTGGGTTTAGTCAGATACAATTTGAGGGATTTTGTAGGTTTATTGATCAAGGCTTGAT  
GGAAGAACTTTATAAGTTTCCAAAAATTGAG-----  
GATACAGATCAAGAAATTGAATTTCAATTATTTGTGGAAACATATCAATTGGCAGAACCCTTGATAAAAGAAAGAGATGC  
TGTGTATGAATCACTC---ACATATTCTTCTGAATTATATGTACCCGCGGGATTAATTTGGAAAACC-----  
AGTAGGAATATGCAAGAACAACAATTTTTATTGGAAACATTCCTCTAATGAATTCCTGGGAACTTCTATAGTAAATGG  
AATATACAGAATTGTGATCAATCAAATATTGCAAAGCCCCGGTATTTATTACCGTTTCAAGATTGGATCAT---AACGGA-  
--ACTTCG---  
GTCTATACCGGCACCATAATATCAGATTGGGGAGGAAGATCAGAATTAGAGATTGATAGAAAAGCAAGGATATGGGCGCG  
TGTGAGTAGGAAACAAAAAATATCTATTCTAGTTCTATCATCAGCTATGGGTTTCAATCTAAGAGAAATTCTAGATAATG  
TTTGCTACCCTGAAATTTTCTTGTCTTTCCCGAATGATAAGGAG-----  
AAAAAAAAGATTGGGTCAAAGAAAATGCCATTTTGGAGTTTTATCAACAATTT-----GCTTGTGTAGGCGGGGAT--  
-CCGGTATTT---  
TCTGAGTCATTATGTAAGGAATTACAAAAGAAATTTTTTCAACAAAGATGTGAATTAGGAAGGATTGGTCGACGAAATAT  
GAACCGGAGGCTGAATCTTGATATACCTCAGAACAATACATTTTTTGTACCAGGATATATTAGCAGCTGCGGATCGTT  
TGATCGGAATTAATTTGGAATGGGTACACTTGACGAT-----  
ATGAATCACTTGAAAAATAAACGTATTCTGTTCTGTAGCGGATCTGTTACAAGATCAATTCGGATTGGCTCTGGTTCTGTT  
AGAAAATGCGGTTTCGAGGAATATATGTGGAGCAATTAGGCATAAATTGATACCGACTCT-----  
CAGAATTTGGTAACCTTCAACTCCA-----  
TTAACAACACTATTATGAATCATTTTTCGGCTTACACCCCTTATCTCAAGTTTTGGATCGAACTAATCCATTGACACAAAT  
AGTTCATGGGCGAAAATCGAGTTATTTGGGTCTGGAGGATTGACGGGGCGAAGTCTAGTTTTTCGGATACGAGATATCC  
ATCCTAGTCACTATGGACGCATTTGCCCAATTGACACGTCTGAAGGAATCAATGTTGGACTTATTGGATCCTTAGCGATT  
CATGCGAGGATTGGTCAT---TGGGGTCTCTAGAAAGTCCATTTTATGAA-----ATTTCT---GAGAGATCAAAA--  
-----AAGGTACGGATGCTTTATTTATCACCAGTAAA-----GATGAATACTAT-----  
ATGGTAGCGGCAGGAAATCTTTGTCTTGAATAAGGGT---ATTCAGGAAGAACAGGTTGTTCCA---  
GCTCGATACCGTCAAGAATTCCTGACTATTGCATGGGAACAGGTTTCATCTTCAAGTATTTTTCCCTTCCAATATTTTTCT  
TATTGGAGCTTCCCTCATTCTTTTTATCGAGCATAATGATGCGAATCGGGCTTTAATGAGTTCTAATATGCAACGTCAAG  
CAGTTCCACTTTCTCGGTCCGAGAAGTGCATTGTTGGAAGTGGGTTGGAACGCCAAGCGGCTCTAGATTCGGGGGTTTCC  
GCTATAGCTGAACACGAGGGAAAGATCATTATACCGATATTGACAAGATCATTTTATCAGGTAATGGA---GAC-----  
-----ACT-----  
CTACGCATTCCATTGGTTATGTATCAACGTTCCAACAAAAATACTTGTATGCATCAAAAACCCAGGTTTCAGCGGGGT--  
-----  
AAATGCATTAAAAAGGGACAAATTTTAGCGGACGGTGCCGCTACAGTCGGTGGCGAAGTCTGCTTTGGGAAAAAACGTATT  
AGTAGCTTATATGCCGTGGGAAGGCTACAATCTGAAGACGCGGACTCATTAGTGAGTGTCTGGTATATAGAGATATTT  
ATACTTCTTTTACATACGAAATATGAAATTCAGACTCATGTGACAAGCCAGGGC---CCC---  
GAAAGGATCACTAACGAAATACCGCATTTAGAAGCCCATTTACTCCGCAATTTAGACAAAAATGGAATTGTGATGCTGGG  
ATCTTGGGTAGAAACGGGTGATATTTTAGTCGGTAAATTAACGCCCCAGACGTCGAAAGAA---

TCATCGTATGCCCCGGAAGATAGATTATTACGAGCCATACTTGAATTTCAGGTATCCACTTCAAAGGAACTTGTCTAAA  
ACTTCCTATAGGTGGCCGGGTTCGAGTTATTGATGTGAGATGGATCCAGAAA---  
AAAGGGGGTTCCAATTATAATCCAGAAACGATT---  
CGTGTATATATTTTACAGAAACGTGAAATCAAGGTAGGTGATAAGGTAGCTGGAAGACATGGGAATAAAGGTATCATTTC  
AAAAATTTTGCCTAGACAAGATATGCCTTATTTGCAAAATGGAACCCCTGTTGATATGGTCTTCAACCCATTAGGAGTAC  
CTTCACGAATGAATGTAGGGCAGATATTTGAATGCTCGCTTGGGTTAGCGGGGGTCTGCTAGACAGACATTATCGAATA  
GCACCTTTTGTAGAGAGATATGAACAAGAGGCTTCGAGAAAACCTAGTGTCTTCTGAATTATATGAAGCCAGTAAGCAAAC  
AGCAAAT---  
CCATGGGTATTTGAACCCGAGTATCCGGGAAAAAGCAGAATATTTGATGGAAGAACGGGAGATCCTTTTGAACAACCTGT  
TATAATAGGAAAGTCTTATATGAAATTAATTCATCAAGTTGATGATAAAATCCACGGGCGTTCAGTGGACATTATG  
CGCTTGTACACAACAACCCCTTAGAGGAAGGGCCAAGCAAGGGGCAACACGGGTAGGCGAAATGGAAGTTTGGGCTCTA  
GAGGGATTTGGTGTGCTCATATTTTACAAGAGATGCTTACTTATAAATCTGATCATATTAGAGCTCGTCAGGAAGTACT  
TGGTACTACGATCATTGGAGGAACAATACCTAACCTGAA-----  
GACACTCCAGAATCTTTTCGATTGCTCGTTTCGAGAACTACGATCTTTGGCTCTGGAACCTGAATCATTTCCTTGTATCT--  
----GAGAAGAACTTC-----CAGATTAAT-----AGGAAGGCAGCT-----  
ATGATCGACCGGTAT-----  
AAACATCAACAACCTTCGAATTGGATTAGTTTCTCCTCAACAAATAAGTGCTTGGGCCAACAAAATCCTACCTAATGGAGA  
GATAGTTGGAGAGGTGACAAAACCTACACTTTTCATTAC-----  
AAAATAATAAACCGGAAAGGGATGGATTATTTTGTGAAAGAATTTTGGGCTATAAAAAGTGAATTTGTGCTTGTGG  
AAATTAT-----CGAGTAATCGGAGATGAAAAAGAA---  
GACCCGAAATTTTGTGAACAATGCGGAGTCAATTTGTTGATTCTCGGATACGAAGATATCAAATGGGATACATCAAATT  
GGCATGCCAGTAACCTCATGTGTGGTATTTGAAACGTATTCCTAGTTATATCGCGAATCTTTTAGATAAACCTCTTAAAG  
AATTAGAAGGCCTAGTATACTGCGAT-----  
TTTTCTTTGCTAGGCCCGTAGCTAAAAACCTACT---TTCTTACGATTACGAGGT---TCATTTGAATAT-----  
-GAAATCCAATCCCGGAAATACAGCATCCCACTTTTTTTTACTACC-----  
CAAGGCTTCGATACATTTGAAATCGAGAAATCTCTACTGGAGCGGGTGTCTATCCGAGAACAAATTAGCCGATCCGGATTT  
GCGAATTATTACGGATTATTCATTGGGAGAATGGAAGAATTAGGGGAA-----  
GAAGGT-----CCCACG-----GGT-----AATGAA-----TGGAAGATAGAAAAATTGGA-----  
-----

AGAAGAAAGGATTTTTTGGTTAGACGCATGGAATTAGCTAAGCATTTTATTTCGAACAAAGGTAGAACCAGAACGGATGGT  
TTTGTGCCTATT

Calycanthus

CTTTTTCTTGAAATATGGACAAATGGAAGTTTAACTCCTAAAGAAGCACTTCACGAAGCTTCTCGTAATTTGATTGATTT  
ATTTATTCTTTTCTACACGCGGAAGAA-----CAGGACATTCATTTGAATTTAGAGGACAATCAA---  
AACAGGTTTACTGTATCCCCTTTTACCCTTCATGATAGA-----TTGGGT-----AATATAAGG-----  
AAAAACAAAAAAGAAATTCATTGAAATGTATTTTTATTGACCAATCAGAATTCGCCACTAGGACCTATAATTGTCTGAA  
AAGGTCCAATATACATACATTATTGGACCTTTTGAATAACAGTCAAGAAGATCTTATGAGAATTGAACATTTTTCGCATAG  
AAGATATAAAACAAATATTGGACATTCTA-----CAGAAGCATTTTCGGA---ATTGAT-----  
-----  
-----

ATGCCTACAATACCAGGATTTAGTCAGATACAATTTGAGGGATTTTGTAGGTTTCATTGACCAGGGCTTGACGGAAGAACT  
TCATAAGTTTCCAAAAATTGAA-----  
GATACAGATCAAGAAATTGAATTTCAATTATTTGTGGAACATATCAATTGGTAGAACCCTTGATAAAAGAAAGAGATGC  
TGTGTATGAATCACTC---ACATATTCTTCTGAATTATATGTATCCGCGGGATTAATTTGGAAAACC-----  
GGTCGAGATATGCAAGAACAACCATATTTATTGGAACATTCCTCTAATGAATTCCTGGGAAACTCTATAGTAAGCGG  
AATATACAGAATTGTAATCAATCAAATATTGCAAAGCCCCGGTATTTATTACCGTTTCAAGATTGGACCAT---AACGGA-  
---ATTTCT---  
GTATATACCGGCACCATAATATCAGATTGGGGGGGAAGACCAGAATTAGAGATTGATAGAAAAGCAAGGATATGGGCCCG  
TGTGAGTAGGAAACAAAAAATATCTATTCTAGTTCCATCATCAGCTATGGGTTTCAAGTCTAAGAGAAATTTAGATAATG  
TTTGCTACCCTGAAATTTTCTTGTCTTTCCCGAATGATAAGGAG-----  
AAAAAAAAGATTGGTTCAAGGGAAAATGCCATTTTGGAGTTTATAAACAATTT-----GCTTGTGTAGGCGGGGAT--  
-CCGGTATTT---  
TCTGAGTCCTTATGTAAGGAATTACAAAAGAAATTTTTTCAACAAAGATGTGAATTAGGCAGGATTGGTCGACGAAATAT  
GAACCGGAGACTGAATATTGATATACCTCAGAACAATACATTTTTTGTGGCCACGAGACGTATTGGCTGTTGTGGATCATT  
TGATCGGAATGAAATTTGGAATGGGCACCTTTGACGAT-----  
ATGAATCACTTGAAAAATAAACGTATTCGTTCTGTAGCAGATCTGTTACAGGATCAATTTGGATTGGCTCTGGTTCTGTTT  
AGAAAATGCGGTTTCGAGGAACCTATATGTGGAGCAATCAGGCATAAATTGATCCCGACCCCT-----

CATAATTTGGTAACTTCAACTCCA-----  
TTAACAACCACTTATGAATCGTTTTTTCGGCTTACACCCCTTATCTCAAGTTTTGGATCGAACTAATCCATTGACACAAAT  
AGTTCATGGGCGAAAATCGAGTTATTTAGGCCCCGGAGGATTAACGGGGCGAACTGCTAGTTTTCGGATACGAGATATCC  
ATCCTAGTCACTATGGACGTATTTGCCCAATTGACACGTCCGAGGGAATCAATGTTGGACTTATCGGATCCTTAGCTATT  
CATGCGAGGATTGGTCAT---TGGGGTCTATAGAGAGTCCGTTTTATGAA-----ATATCT---GAGAAATCCAAA--  
-----GAG-----ATCGTTTTATTTACCACCAAGTAGA-----GACGAATATTAC-----  
ATGGTAGCGGCAGGAAATCTTTGGCCTTAAATCGGGGT---ATTCAGGAAGAACAGGTTGTTCCA---  
GCTAGATACCGTCAAGAATTCCTGACTATTGCATGGGAACAGATTTCATCTTCGAAGCATTTCCTTCCAATATTTTTTC  
TATTGGAGCTTCCCTCATTCCCTTTTATCGAGCATAATGATGCAAATCGGGCTTTAATGAGTTCTAATATGCAGCGTCAAG  
CAGTTCGCTTTCTCGGTCCGAGAAGTGCATTGTTGGAACGGGTTGGAAGGCCAAGCAGCTCTAGATTCGGGGGTTTCG  
GCTATAGCAGAACACGAGGGAAAGATCATTATACCGGATACTGACAAGATCGTTTTATCAGGTAATAGA---GAC-----  
-----ACT-----  
ATAAGCATTCCATTGGTTATGTATCAACGTTCTAACAAAAATACTTGTATGCATCAAAAACCTCGAGTTCGCGGGGT--  
----  
AAATGCATTAAAAAGGGGCAAATTTTAGCGGACGGAGCGGCTACAGTTGGTGGCGAACTCGCTTTGGGAAAAAACGTATT  
AGTAGCTCATATGCCATGGGAAGGCTACAATTCTGAAGACGCGGTACTCATTAGCGAACGTCTGATATATGGGGATATTT  
ATACTTCTTTTACATACGGAAATATGAAATTCAGACTCATGTGACAAGCCAAGGT---CCT---  
GAAAGAATCACTAATGAAATACCACATTTAGAAGCCCATTTACTCCGCAATTTAGACAAAAATGGAATTGTGATGCTGGG  
ATCTTGGATAGAAAGAGGTGATATTTTAGTGGGTAAATTAACGCCTCAGGCGGCGAAAGAA---  
TCGTGATGCCCCGGAAGATAGATTATTACGAGCCATACTTGGCATTTCAGGTATCCACTGCAAAGGAACTTGTCTAAA  
ACTACCTATAGGCGGAAGGGGTGCGATTATTGATGTGAGATGGATCCAGAAA---  
AAAGGGGGTTCCAGTTATAATCCAGAAACGATT---  
CGTGTATCTATTTTACAGAAACGTGAAATCAAAGTGGGTGATAAAGTAGCCGGAAGACATGGGAATAAGGGCATCGTTTC  
CAAAATTTTGCCTAGACAAGATATGCCTTATTTGCAAGATGGAACGCCAGTTGATATGGTCTTCAACCCATTAGGAGTAC  
CTTCGCGAATGAATGTGGGACAAATGTTTGAATGCTCGCTCGGATTGGCGGGGTACCTGCTGGACAAACATTATAGAATA  
GCACCCTTTGATGAGAGATATGAGCAAGAGGCTTCGAGAAAACCTAGTGTTCCTGAATTATATTCAGCCAGTAAGCAAAC  
AGTAAAT---  
CCTTGGGTATTTGAACCCGAGTATCCAGGAAAAAGCAGAATATTTGATGGAAGAACGGGAGATCCTTTTCAACAACCTGT  
TATAATAGGAAAGTCTATATCTGAAATTAATTCATCAAGTTGATGATAAAATCCACGGACGTTCCAGTGGACATTATG  
CACTTGTACACAACAACCTCTTAGAGGAAGGGCCAAGCAAGGGGGACAACGAGTAGGAGAAATGGAAGTTTGGGCTCTA  
GAGGGATTTGGTGTGCTCATATTTACAAGAAATGCTTACTTATAAATCGGATCATATTAGGGCTCGCCAGGAAGTACT  
TGGTGCTACGATCATTGGAGGAACAATACCTAAACCTGAG-----  
GATGCTCCTGAATCTTTTTCGGTTGCTCGTTTCGAGAACTACGATCTTTGGCTCTGGAACCTGAATCATTTTCTTGTATCT--  
----GAGAAGAAGTTC-----CAGATTAAT-----AGGAAGGAAGCT-----  
ATGATCGACCGGTAT-----  
AAACATCAACAACCTTCGAATTGGATCAGTTTTCTCTCAACAAATACGTGCTTGGGCCAACAAAACCTACCTAATGGAGA  
GATAATTGGAGAGGTGACAAAACCTATACTTTTTCATTAC-----  
AAAACCAATAAACCGGAAAAAGATGGATTGTTTTGTGAAAGAATCTTTGGACCTATAAAAAGTGAATTTGTGCTTGTGG  
AAATTAT-----CGAGTGATCGGAGATGAAAAAGAA---  
GACCCGAAATTTTGTGAACAATGCGGAGTTCGAGTTTGTGATTCTCGGATACGAAGATATCAAATGGGATACATCAAAC  
GGCATGTCCAGTGACTCATGTGTGGTATTTGAAACGTCTTCTAGTTATATCGCGAATCTTTTAGATAAACCCCTTAAGG  
AGTTCGAAGGCCTAGTATACTGCGAT-----  
TTTTCTTTTGTAGGCCCATAGCTAAAAACCTACT---TTCTTGGCATTACGAGGT---TCATTGCAATCT-----  
-GAAATCCAATCCCGGAAATACAGCATCCCACTTTTTTTTACTACC-----  
CAGGGCTTCGATACATTTGAAATCGAGAAATCTCTACTGGAGCAAGTGTCTATCAGAGAACAATTAGCTGATCCGGATTT  
GCGAATTATTACAGATCATTTCATTGGTAGAATGGAAGAATTAGGGGAA-----  
GAAGGG-----TCCACT-----GGG-----AATGAA-----TGGGAAGATAGAAAAATTGGA-----  
----  
AGAAGAAAGGATTTTTTGGTTAGACGCATAGAATTAGCTAAGCATTTTTATTCGAACAAATGTAGAACCAGAACGGATGGT  
TTTGTGCCTATT  
Ceratophyllum  
CTCTTTCTTGAATATGGACGAATGGGAGTTTAAACCCCTAAGGAAGCACTTTACGAAGCTTCCCGTAATTTAATTAATTT  
ATTTATTCCTTTTCTACATGCGGAGGAA-----CAGGAAATCCTT-----TTAGAGGACAGTGAA---  
AACATATCCACTGTACCCCTTTTTACCTTTTATAATGAA-----TTGGCT-----AATCTAAAG-----  
AAAAACAAAAAAGGAATTGCATTAATAATGATTTTTTATTGACCAATTAGAATTGCCTTCCAGAACCTATAATTGTCTCAA  
AAGGTCCAATATACACACATTATTTGATCTTTTGGAGTAATAGTAAAGAAGATCTTATGAGAATTGAACATTTTCGAGTAG  
AAGATGTAACAAATATTAGACATTCTA-----CAGAAGAATTTTCGCA---

ATGAATTTACCTAAGGATTTTTTTTTAA-----ATGCTCCGGGAT---AGA---  
AACGAGGGAATGTCTACAATACCTGGATTTAGTCAGATACAATTTGAGGGATTTTGTCTGATTTCTTGATCAGGGCTTGAC  
GGAAGAACTTCATAAGTTTTCCAAAAATTGAA-----  
GATACAGATCAAGAAATTGAATTTCAATTATTTGTGGAAACATATCAATTAGCGGAACCCCTTGATAAAAGAAAAAGATGC  
TATATATGAATCACTC---ACATATTCTTCTGAATTATATGTACCCGCGGGATTAATTTGGAAAAAT-----  
GGTAGAGATATGCAAGAGCAAACCGTATTTATTGGAAACATTCTCTAATGAATTCTCTGGGAACCTCTATAGTAAATGG  
AATATACAGAATTGTGATCAATCAAATATTGCAAAGTCCCGGTATTTATTACCGTTTCAAGATTGGACCAT---AACGGA-  
--ATTTCT---  
GTCTATACGGGACCATAATATCAGATTGGGGAGGAAGATCAGAATTAGAGATTGATAGAAAAGCAAGGATATGGGCTCG  
TGTGAGTAGGAAACAAAAAATATCTATTCTAGTTTTATCATCAGCTATGGGTTCAAATCTAAGAGAAATTCTAGATAATG  
TTTGCTACCCGGAAATTTCTTGTCTTTCTTGAATGATAAGGAT-----  
AGAAAAAAGATTGGGTCAAAAGAAAAATGCCATTTTGGAGTTTTATCAACAATTT-----GCTTGTGTAGGGGGGGAT--  
-CCGGTATTT---  
TCTGAGTCCTTATGTAAGGAATTACAAAAGAAATTTTTTCAACAAAGATGTGAATTAGGAAGGATTGGTTCGACGAAATAT  
GAACCAGAGACTGAATCTGAATATACCTCAGAACAATACATTTTTTGTACCACGAGATGTATTAGCTGCGGCCGATCATT  
TGATCGGAATGAAATTTGGAATGGGTACACTTGACGAT-----  
ATGAATCACTTGAAAAATAAACGTATTCGGTCTGTAGCGGATCTGTTACAGGATCAATTCGGATTGGCTCTTGTTCGTTT  
AGAAAATGCGATTTCGCGGAACATAAGTGGAGCAATCAAACATAAATTAATACCGACTCT-----  
CAGAATTTGGTAACTTCAACTCCA-----  
TTAACAACCACTTTTGAATCGTTTTTTCGGCCTACACCCTTTATCTCAAGTTTTGGATCGAACTAATCCGTTGACACAAAT  
TGTTTCATGGGCGAAAATCGAGTTATTTGGGCCCTGGAGGAGTGACTGGGCGAACTGCTAGTTTTCGGATACGAGATATTC  
ATCCTAGTCACTATGGACGATTTGCCCAATTGACACGTCGGAAGGAATTAATGTTGGACTTATTGGATCCTTAGCTATT  
CATGCGAAGATTGGTTTT---TGGGGATCCATAGAACTCCTTTTTATGAA-----ATATCG---GAGAAATCAAAA--  
-----GAGGCACAGATCGTTTTATTTACCACCAAGTAGA-----GATGAATATTCT-----  
ATGGTAGCGGCAGGAAATCTTTGGCATTAAATCGGGGT---ATTCAGGAAGAACAGGTTGTTCCA---  
GCTCGATACCGTCAAGAATTCCTGACTATTGCATGGGAAAAGATTTCATCTTCGAAGCATTTCCTTTCCAATACTTTTT  
CATTGGCGCTTCACTTATTCTTTTATCGAGCATAATGATGCGAATCGGGCTTTAATGAGTTCGAATATGCAACGTC  
CGGTTCCGCTTTTTAGGTCCGAGAAGTGTATCGTTGGAACCTGGATTGGAACGCAAGTTGCTCTAGATTTCGGGGGTTTCA  
GCTATAGCGGAACACGAGGGAAAGATCCTTTATACCGATACTGACAAGATCGTTTTATCAGCTAATGGG---GAC-----  
-----ACT-----  
ATAAGCATTCCATTAGTTATGTATCAACGTTCCAACAAAAATACTTGTATGCATCAAAAACCTCAGGTTTCAGAGAAAT--  
-----  
AAATGCATTAAAAAGGGGCAAATTTAGCCGATGGGGCGGCTACGGTTGGGGGCGAACTTGCTTTGGGAAAAAATGTATT  
AGTAGCTTATATGCCATGGGAAGGCTACAATTCTGAAGACGCAGTACTCATTAGCGAACGTATGGTATATGAAGATATTT  
TTACTTCTTTTACATCCGGAAATATGAGATTGAGACTCATGTAACAAGCCAAGGC---CCC---  
GAAAGAATTACTAACGAAATACCGCATTTAGAAGCGCATTTACTTAGAAATTTAGACAGAAATGGAATTGTGAGGCTGGG  
ATCTTGGATAGAAACAGGTGATATTTTAGTAGGTAATTAACACCTCAGACAGCCAAAGAA---  
TCATCGTATGCCCCGGAAGATAGATTATTGCGAGCTATACTTGGCGTTTCAGGTATCCACTGCAAAAGAACTTGTCTAAA  
ACTACCTATAGGCGGAAGGGGTGAGATTATTGATGTGAGATGGATCCAGAAA---  
AAAGGAGGTTCCAGTTATAATCCAGAAACGATT---  
CGTGTATATATTTACAGAAACGTGAAATCAAAGTAGGTGATAAAGTAGCTGGAAGACATGGAAATAAAGGTATCATTTC  
CAAAATTTTGGCTAGACAAGATATGCCTTATTTGCAAGATGGAACACCTATTGATATGGTTTTCAATCCATTAGGAGTAC  
CTTCGCGAATGAATGTGGGACAGATTTTGAATGTTCTCTCGGGTTAGCGGGGAGACCTGCTGGACAGACATTATAGAATA  
GCACCCTTTGACGAGAGATATGAGCAAGAGGCTTCGAGAAAACCTAGTGTTCCTGAATTATATGAAGCCAGTAAGCAAAC  
ATCAAAT---  
CCATGGGTATTTGAACCCGAGTATCCTGGAAAAAGCAGAATATTTGATGGAAGAACAGGAGATCCTTTTGAACAACCACT  
TATAATAGGAAAGTCTTATATTCTTAAATTAATTCATCAAGTTGATGATAAAATCCATGGGCGTTCCAGTGGACATTATG  
CACTTGTTTACACAACAACCCCTTAGAGGAAGGGCCAAACAGGGGGGACAACGAGTAGGAGAAATGGAAGTTTGGGCTCTG  
GAGGGATTTGGTGTGCTCATATTTACAAGAAATGCTTACTTATAAATCTGATCATATCAGAGCTCGTCAGGAAGTACT  
TGGTACTACAATAATTGGGGGAACAATACCTAATCCTGAG-----  
GATGCTCCAGAATCTTTTCGATTGCTCGTTTCGAGAATTACGATCTTTAGCTCTTGAACCTGAATCATTTCCTTATATCT--  
---GACAAGAACTTC-----CAGATTAAT-----AGGAAGGAAGCT-----  
ATGATCGACCGGTAT-----  
AAACATCAACAACCTTCGAATTGGATCAGTTTTCTCTCAACAAATCATTAAATGGGGCAAGAAAATCCTACCTAATGGGGA  
GATAGTTGGAGAAGTAACAAAACCTATACTTTTCATTAC-----  
AAAACCAATAAACCGGAAAAAGATGATTATTTTGTGAAAGAATCTCTGGACCTATAAAAAGTGGGATTTGTGCTTGTGG



AAATTAT-----CGAGTGATCGGAGATAAAAAAGAA---  
GACCCGAAATTTTGTGAACAATGCGGAGTCGAGTTTGTGACTCTCGGATACGAAGATATCAAATGGGATACATCAAATT  
GGCCTGTCCAGTGACTCATGTGTGGTATTTGAAACGTTTGCCTAGTTATATCGCGAATCTTTTAGATAAAACCCCTTAAGG  
AGTTAGAAGGCCTAGTATACTGCGAT-----  
TTTTCTTTTGTAGGCCCATAGCTAAAAAACCGACT---TTCTTACGATTACGAGGT---TCATTTCGAATAT-----  
-GAAATCCAATCCCGGAAATACAGCATCCCACTTTTTTTTACTACC-----  
CAAGGTTTCGATACATTTTCGAAATCGAGAAATCGCTACGGGAGCAGGTGCTATCAGAGAGCAATTAGCCGATCTGGATTT  
GAGAATTATTATAGATCATTTCATTGGTAGAATGGAAGGAATTAGGGGAA-----  
GAAGGA-----TCTACA-----GGA-----AATGAA-----TGGGAAGATAGAAAAATTAGA-----  
-----

AGAAGAAAGGATTTTTTGGTTAGGCGCATGGAATTAGCTAAGCATTTTATTTCGAACAAATATAGAACCAGAACGGATGGT  
TTTGTGTCTATT

Chloranthus

CTTTTTCTCGAAATATGGACGAATGGAAGTTAACTCCTAAAGAAGCACTTCACGAAGCTTCTCGTAATTTGATTGATTT  
ATTTATTCTTTTCTACATGCGGAGGAA-----GAGGGCATTTCGT-----TTAGAGGACAATCCA---  
AACCGGTTTAATATACCTTTTTTTTACCTTTCATGATGGG-----TTGGCTAATACTAATATAAGG-----  
AAAAAGAAAAAAGGAATTGCATTGAAATGTATTTTTTATTGACCAATCAGAATTGCCTCCCAGGACCTATAATTATCTCAA  
AAGGTCCAATATAAATACATTATTGGACCTTTTGGAGTAACAGTCAAGAAGATTTTCTGAAAATTGAACATTTTCGTATAG  
AAGATGTAAAACAGATATTGGACATTCTA-----CAGAAGCATTTCACA---ATTGATTGT-----  
-----

-----ATGCTCCGGGAT---GGA---

AATGAGGGAATGTCTACAATACCTGGATTTAATCAGATACAATTTGAGGGATTTTGTAGGTTTCATTGATCAGGGCTTGAC  
GGAAGAACTTCATAAGTTTCCAAAAATTGAA-----

GATACAGATCAAGAAATTGAATTTCAATTATTTGTGGAAACATATCAATTGGTGGAAACCTTTGATAAAAGAAAGAGATGC  
TGTGTATGAATCACTC---ACATATTCTTCTGAATTATATGTACCCGCGGGATTAATTTGGAAAACC-----

AGTAGAGATATGCAAGAACAACCGTATTTATTGGAAACATTCTCTAATGAATTCCTGGAAACCTCTATAGTAAATGG  
AATATACAGAATTGTGATCAATCAAATATTGCAAAGCCCCGGTATTTATTACCGTTTCAGAATTGGACCAT---AACGGA-  
--ATTTCT---

GTCTATACCGGCACCATAATATCAGATTGGGGAGGAAGATCAGAATTAGAGATTGATAGAAAGGCAAGAATATGGGCCCG  
TGTGAGTAGGAAACAAAAAATATCTATTCTAGTTCCATCATCAGCTATGGGTTTCAATCTAAGAGAAATTCTAGATAATG  
TTTGCTACCCTGAAATTTTCTTGTCTTTCCCGAACGATAAGGAG-----

AAAAAAAATTTGGGTCAAAGGAAAATGCCATTTTGGAGTTTTATCAACAATTT-----GCTTGTGTAGGTGGGGAT--  
-CCGATATTT---

TCTGAATCCTTATGTAAGGAATTACAAAAGAAATTTTTTCAACAAAGATGTGAATTAGGAAGGATTGGTTCGACGAAATAT  
GAACCGGAGACTGAATCTTGATATACCTCAGAACAATATATTTTTTGTACCACGAGATGTCTTGGCTGCTGCGGATCATT  
TGATCGGAATGAAATTTGGAATGGGTACACTTGACGAT-----

ATGAATCATTGAAAAATAAACGTATTCGTTCTGTAGCAGATCTTTTACAGGATCAATTCGGATTGGCTCTGGTTCGTTT  
AGAAAATGTAGTTCGAGGAACCTATATGTGGAGCAATCAGGCATAAATTGATACCGACTCCT-----  
CATAATTTGGTAACCTTCAACTCCA-----

TTAACAACCACTTATGAATCGTTTTTTCGGCCTACACCCTTTATCTCAAGTTTTGGATCGAACTAATCCATTGACACAAAT  
AGTTCATGGGCGAAAATCGAGTTATTTGGGTCTGGAGGATTGACAGGGCGAACCGCTAGTTTTTCGGATACGAGATATAC  
ATCCTAGTCACTATGGACGATTTGCCCAATTGATACGTCCGAAGGAATCAATGTTGGACTTATTGGATCTTTAGCTATT  
CATGCCAGGATTGGTCAT---TGGGGGTCTATAGAGAGTCCATTTTATGAA-----ATTTAT---GAGAGATCAAAA--  
-----GAGGTACAGATGGTTTTATTTATCACCAAGTAGA-----GATGAATACTAT-----

ATGGTAGCGGCAGGAAATCTTTGGCGTTGAATCAGGGT---ATTCAGGAAGAACAGGTTGTTCCA---  
GCTCGATACCGTCAAGAATTCCTGACTATTGCATGGGAACAGATTCATCTTCGAAGCATTTTCCCTTTCAATATTTTTTC  
TATTGGCGCTTCCCTCATTCTTTTTATCGAGCATAATGATGCGAATCGGGCTTTAATGAGTTCTAATATGCAGCGTCAAG  
GAGTTCCACTTTCTCGGTCCGAGAAGTGCATTGTTGGAACCTGGGTTGGAACACCAAGCGGCTCTAGATTCCGGGGTTTCA  
GTTATAGCCGAACACGAAGGAAAGATCATTATACCGGAGACTAACAAGATCGTTTTTCTCAGGTAATGGA---GAT-----  
-----ACT-----

ATAAGCATTCCATTGGTTATGTATCAACGTTCCAACAAAAATACTTGTATGCATCAAAACCCTCAGGTTTCAGCGTGGT--  
-----

AAATGCATTAAAAAAGGACAAATTTTAGCGGGGGGTGCGTCTACCGTTGGTGGCGAACTCGCTTTGGGAAAAAACATATT  
AGTAGCTTATATGCCATGGGAAGGCTACAATTCTGAAGACGCGGTACTCATTAGCGAACGCCTGGTATATGGAGATATTT  
ATACTTCTTTTTCACATCCGGAATATGAAATTAAGACTCATGTGACAAGCCAAGGT---CCC---

GAAAGAATTACTAAGGAAATACCGCATTTAGAAGCTAATTTACTCCGCAATTTAGACAAAAATGGAATTGTGATGTTGGG  
ATCTTGGATAGAAACAGGTGATATTTTAGTAGGTAATTAACACCTCAGACAGCAAAAAGAA---  
-----

-----

-----

-----

-----

-----

-----

-----

-----

-----

-----

TCATCGTATGCCCCGGAGGATAGATTATTACGAGCCATACTTGGCATTTCAGGTATCCACTACAAGGGAACTTGTCTAAA  
ACTACCTATAGGCGGAAGGGGGCGAGTTATTGATGTGAGATGGATCCAGAAA---  
AAGGGGGTTCAAGTTATAATCCAGAAACGATT---  
CGTGTATATATTTTACAGAAACGTGAAATCAAAGTAGGTGATAAAGTAGCCGGAAGACATGGGAATAAAGGTATCATTTC  
AAAAATTTTGCCTAGACAAGATATGCCTTATTTGCAAGATGGAAGACCAGTTGATATGGTCTTCAACCCATTAGGAGTAC  
CTTCACGAATGAATGTGGGACAGATATTTGAATGCTCCCTAGGGTTAGCGGGGGATCTGCTGGACAGACATTATAGAATA  
GCACCCTTTGATGAGAGATATGAGCAAGAGGCTTCGAGAAAACCTAGTGTTCCTGAATTATATGAAGCCAGTAAGCAAAC  
AGCAAAT---  
CCATGGGTATTTGAACCCGAATATCCGGGAAAAAGCAGAATATTTGATGGAAGAACAGGAGATCCTTTTGAACAACCTGT  
TATAATGGGAAAGTCTATATCTGAAATTAATTCATCAAGTTGATGATAAAAATCCATGGACGTTCCAGTGGGCATTATG  
CACTTGTACACAACAACCCCTTAGAGGAAGGGCCAAGCAAGGGGGGACAACGTGTAGGAGAAATGGAGGTTTGGGCTCTA  
GAGGGATTTGGTGTGCTCATATTTTACAAGAAATGCTTACTTATAAATCTGATCATATTAGAGCTCGTCAGGAAGTACT  
TGGTACTACGATCATTGGAGGAACAATACTTAACCCTGAA-----  
GATGCTCCAGAATCTTTTCGATTGCTCATTTCGAGAACTACGATCTTTGGCTCTGGAAGTGAATCATTTCCTTGTATCT--  
----GAGAAGAACTTC-----CAGATTAAT-----AGGAAGGAAGCT-----  
ATGATCGACCGGTAT-----  
AAACATCAACAACCTTCGAATTGGATCAGTTTTCTCTCAACAAATAACTGCTTGGGCCAACAAAATCCTACCTAATGGAGA  
GATAGTTGGAGAGGTGACAAAACCTATACTTTTCATTAC-----  
AAAACCAATAAACCAGGAAAAAGATGGATTGTTTTGTGAAAGAATCTTTGGACCTATAAAAAGTGAATTTGTGCTTGTGG  
AAATTAT-----CGAGTGATCGGAGATGAAAAAGAA---  
GACCCGAAATTTTGTGAACAATGCGGAGTCGAGTTTGTGATTCTCGGATACGAAGATATCAAATGGGATACATCAAAC  
GGCATGTCCAGTGACTCATGTGTGGTATTTGAAACGCTTCTCTAGTTATATCGCGAATCTTTTAGATAAACCCTTAAGG  
AATTAGAAGGTCTAGTATACTGCGATGTG-----  
TATCCCAATTTTCTTTTGGCTAGGCCCATAGCTAAAAACCTACT---TTCTTACGATTACGAGGT---  
TCATTCGAATAT-----GAAATCCAATCCTGGAAATACAGCATCCCACTTTTTTTTACTACC-----  
-----  
CAGGGCTTCGATACATTTTCGAAATCGAGAAATCTCGACTGGAGCAGGTGCTATCAGAGAACAATTAGCCGATCCGGATTT  
GCGAATATTACAGATCATTTCATTGGTAGAATGGAAGGAATTAGGGGAA-----  
AAAGGA-----TCTACT-----GGG-----AATGAA-----TGGAAGATAGAAAAATTGGA-----  
-----  
AGAAGAAAGGATTTTTTTAGTTAGACGCCTGGAATTAGCTAAGAATTTGATTGAAACAAATGTAGAACCAGAATGGATGGT  
TTTGCCTATT  
Citrus  
CTTTTTCTAGAAATATGGACAAACGGAAGTTAACTCCTAAAGAAGCACTTCATGAAGCCTCCCGGAGTTTGATTGATTT  
ATTTATTCCCTTTCTCCAGGCAGAAGAC-----GAAACTTACCT-----TTAGAGAACAATCAA---  
TACAAGGTTACTTTACCCTTTTTTACTTTTCATGATAGA-----TTGGCT-----AACTAACG-----  
AAAAAGAAAAAAGAAATCGCATTGAAATCGATTTTTATTGACCAATCAGAAATGTCTCCAGGATCTATAATTGTCTCAA  
AAAGTCCAATATACATACATTATTTCGACCTTTTGAATACGCGTCAAGAAGACCTTATGAAAATTGAACACTTTTCGATAG  
AGGATGTAAAGCAGATAATGAGTATTCTA-----GAAAAGAAA-----  
-----  
-----ATGCTCGGAGAT---GGA---  
AATGCAGGAATGTCTACAATACCTGGGTGGAATCAGATACAATTTGAAGGATTTTGTAGGTTTCATTGATCAGGGCTTAAC  
AGAAGAGCTTTATAAGTTTCCAAAATTTGAA-----  
GATACAGATCAAGAAATTTGAATTTCAATTATTTGTGGAAACATATCAATTGGTAGAACCTTGCTAAAAGAAAGAGATGC  
TGTATATGAATCATT---ACGTATTCTTCTGAATTATATGTATCCGCAGGATTAATTTGGAAAAGC-----  
CGAGGGGACATGCAGGAACAAACTATTTTTATTGGAAACATTCTCTAATGAATCCTTTGGGAACTTCTATAGTAAACGG  
AATATACAGAATTGTCATCAATCAAATATTGCAAAGTCCCGGTATCTATTATCGGTGAGAATTGGGCCAT---AACGGA-  
--ATTTG---  
GTCTATACAGGCACCATAATATCTGATTGGGGGGGAAGATTGCAATTAGAGATTGATAGAAAAGCAAGGATATGGGCTCG  
TGTGAGTAGGAAACAGAAAGTATCTATTCTAGTTCTATCAGCAGCTATGGGTTCGAATCTACGAGAAATTCTAGAGAATA  
TTTGCTACCCTGAAATTTTCTTGTCTTTTCTGACGAATAAGGAG-----  
AAAAAAAATTTGGATCAAAAGAAAATGCCATTTTGGAGTTTATCAACAATTT-----GCTTGTGTAGGCGGAGAT--  
-CCGGTATTT---  
TCGGAATCCTTATGTAAGGAATTACAAAAGAAATTTTTTACCACAAAGATGTGAATTAGGAAAGATTGGTAGACGAAATAT  
GAACCAGAGACTGAATCTGAATATACCTCAGAACAATACATTTTTTGTACCACGAGATGTATTGGCAGCTGTGATCATT  
TGATTGGACTGAAATTTGGAATGGGTACACTTGACGAT-----  
ATGAATCATTGAAAAATAACGTATTCGGTCTGTGCGAATCTTTTACAAGATCAATTCGGATTGGCCCTGGTTCGGTT

AGAAAATGTGATTAGAGGAACTATATGTGGAGCAATTAGGCATAAATTGATGCCAACTCCT-----  
CAAAATTTGGTAACTTCAACTCCC-----  
TTAACAACCACTTATGATTCTTTTTTCGGATTACATCCATTATCTCAAGTTTTGGATCGAACTAACCCATTGACACAAAT  
AGTTCATGGGAGAAAATTGAGTTATTTGGGCCCCGGAGGATTGACAGGGCGAACTGCGAGTTTTCGGGTACGAGATATCC  
ATCCTAGTCACTATGGCCGCATTTGTCCAATTGACACGTCCGAAGGAATCAATGTTGGACTTATTGGATCCTTAGCAATT  
CATGCGAGAATTGGTTAT---TGGGGGTCTCTAGAAAGCCCGTTTTATGAA-----ATCTTT---GAAAAATCAAAA--  
-----AAAGTACGGATGCTTTATTTATCACCAAGTAGA-----GATGAATACTAT-----  
ATGGTAGCGGCAGGAAATCTTTGGCACTGAATCAGGGT---AGTCCGGAAGAACAGGTTGTTCCG---  
ACTCGATACCGTCAAGAGTTCCTGACTATTGCGTGGGAACAGGTTTCATCTTCGAAGTATTTTTCCCTTCCAATATTTTTTC  
TATTGGGGCTTCCCTCATTCTTTTATCGAGCATAATGATGCGAATCGGGCTTTAATGAGTTCTAATATGCAACGCCAAG  
CAGTTCGGCTCGTTCGGTCCGAGAAGTGCATTGTTGGAACCTGGGTTGGAACCTCAAGTGGCTCTAGATTCCAGGGGTTCCC  
GCTATAGCCGAACACGAGGGAAAGATCATTATACCCGATATTGACAAGATTGTTTTATCGGGAAACGGT---AAT-----  
-----ACA-----  
TATAGTATCCCATTAATTATGTATCAACGTTCAAACAAAAATACTTGTATGCATCAAAAACCCAGGTTGGGCGGGGT--  
----  
AAATGCATTAAAAAGGGCCAAGTTTTAGCGGATGGTGCCGCTACAGTTGGCGGCGAACTCGCTTTAGGGAAAAACATATT  
AGTAGCTTATATGCCATGGGAAGGCTACAATTTTGGAGGATGCGGTACTTATTAGCGAACGTCTGATATATAGAGATATTT  
ATACTTCTTTTACATACGGAAATACGAAATTCAGACTCATGTGACAAGTCAAGGT---CCC---  
GAAAGGATCACTAATGAAATACCACATCTAGAAGCCCGGTTACTCCGCAATTTAGACAAAAATGGAATTGTGATGCTGGG  
ATCTTGGGTAGAGACCGGCATATTTTAGTAGGTAAATTAACGCCTCAGGCGGCGAAAGAA---  
TCATCGTATGCTCCGGAAGATAGATTATTACGGGCCATACTTGGCATTCCAGGTATCCACTTCAAAGGAACTTGCCTAAA  
ACTACCTATAGGTGGTAGGGGTGCGGTTATTGATGTGAGATGGGTCCAGAAA---  
AAGGGGGTTCTAGTTATAATCCAGAAACGATT---  
TGTGTATATATTTACAGAAACGTGAAATCAAAGTAGGTGATAAAGTAGCTGGAAGACATGGAAATAAGGGTATCGTTTC  
AAAAATTTTGCCTAGACAGGATATGCCTTATTTGCAAGATGGAAGGCCTGTTGATATGGTTTTCAACCCACTAGGAGTAC  
CCTCGCGAATGAATGTAGGACAGATATTTGAATGCTCGCTCGGGTTAGCGGGGGGTCTGCTAAATCGACATTATCGAATA  
GCACCTTTTGATGAGAGATATGAACAAGAGGCTTCGAGAAAACCTCGTGTTTTCTGAATTATATGAAGCCAGTAAGCAAAC  
CGCGAAT---  
CCATGGGTATTTGAGCCGGAATACCCGGGAAAAAGCAGAATATTTGATGGACGAACGGGAGATCCTTTTTGAAGAACCTGT  
TCTAATAGGAAAGCCTTATATCTTGAAATTAATTCATCAAGTTGATGATAAAGTACACGGACGTTCCAGTGGGCATTATG  
CACTTGTTACCCAACAACCCCTTAGAGGAAGGTCCAAACAAGGGGGACAACGGGTAGGAGAAATGGAGGTTTGGGCTCTA  
GAGGGCTTTGGTGTGCTCATATTTTACAAGAGATGCTTACTTATAAATCTGATCATATTAGAGCGCGCCAAGAAGTACT  
TGGTACTACAATCATTGGAGAAACAATACCTAACCCGGAA-----  
GATGCTCCAGAATCTTTTCGATTGCTCGTTCGAGAACTACGATCTTTGGCTTTGGAACCTGAATCATTTTGTTGTATCT--  
---GAGAAAAACTTC-----CAGATTAAT-----AAGAAGGAAGCT-----  
ATGATTGATCGAT-----  
AAACATCAACAACCTCCGAATTGGATCAGTTTTCTCCTCAACAAATACGCGCTTGGGCCAATAAAAATCCTACCTAATGGAGA  
GATAATTGGAGAAGTGACAAAACCTATACTTTTCATTAC-----  
AAAACCAATAAACCGGAAAAAGATGGATTATTTGTGAAAGAATTTTTGGGCCTATTAAGAGTGAATTTGTGCTTGTGG  
AAATTAT-----CGAATAATCGGAGATGAAAAAGAA---  
GACCCGCAATTTTGTGAACAATGTGGGGTTGAATTTGTTGATTCTCGGATACGAAGATATCAAATGGGATACATAAACT  
GGGATGCCAGTAACCCACGTGTGGTATTTGAAACGTCTTCCCTAGTTATATCGCGAATCTTTTAGATAAACCTCTTAAAG  
AATTAGAAGGCCTAGTATATTGCGAT-----  
TTTTCTTTTGTAGGCCTATAGCGAAAAAACCGACT---TTTTTACGATTACGCGGT---TCATTGGAATAT-----  
-GAAATACAATCCTGGAAATACAGCATCCCACTTTTTTTTACTACC-----  
CAAGGTTTCGATAAATTTCTGTAACCGAGAAATTTCTACTGGAGCAGTTGCTATCCGGGAACAATTAGCCGATCTAGATTT  
GCGAATTATTCTAGATAATTCCTTGTTAGAATGGAAAGAATTAGGGGAA-----  
GAAGGG-----CCCGCC-----GGT-----AATGAC-----TGGGAAGATCGAAAAATTGGA-----  
----  
CGAAGAAGGGATTTTTTGGTTAGACGCATGGAATTAGCTAAGCATTCTTTCGAACAAATATAGAACCAGAGTGGATGGT  
TTTATGTCTATT  
Coffea  
CTTTTTCTCGAAATATGGACAAACGGAAGTTAACTCCGAAAGAAGCACTTCATCAAGCCTCCCGCAATTTGATTGATTT  
ATTTATTCCATTTTACATATGGAAGAA-----CAAACCTCACAT-----TTAGAGAACAATCAA---  
CACACGGTTCCTTTAGCTCCTTTTTTCTTTTCATGATAAA-----TTGGAT-----AAACTCAGA-----  
AAAAACAAAAAAGAAATAGCATTAAATCGATTTTTTATTGACCAATCAGAATTGCCCCCAAGGATCTACAATTGCCTCAA  
AAGGTCCAATATATATACATTATTGGACCTTTTGAATAATAGTCAAGAAAATCTTATGAAAATTGAACATTTCCACATAG

AAGATGTAAGAGATATTGGGCATTCTC-----GAAAAACAGTTGGTA---ATTTTTTTTACCGAAAAA-----  
-----  
-----ATGCTCGGGGAT---GGA---  
AATGAGGGAATGGCTACAATACCTGGATTTAATCAGATACAATTTGAAGGCTTTTGTAGGTTTATTGATCAGGGTTTGGC  
GGAAGAAGCTTTATAAGTTTTCCAAAAATTGAA-----  
GATACAGATCAAGAAATCGAATTTCAATTATTTGTGGAAACATACCAATTAGTAGAACCATTTGATAAAGGAAAGAGATGC  
CGTGTATGAATTACTC---ACATATTCTTCGGAATTATATGTATCCGCAGGATTGATTTGGAAAACC-----  
GGCAGGGATATGCAAGAACAACAATTTTTATTGGCAACATTCTCTAATGAATCCCTAGGAACTTTTATAGTAAATGG  
AGTATATAGAATTTTGTATCAATCAAATATTGCAAAGTCCCGGTATTTATTACCGGTCAGAATTGGACCAT---AACGGA-  
--ATTTCT---  
GTCTATACCGGGACCATAATATCAGATTGGGGAGGAAGATCAGAATTAGAGATTGATAGAAAAGCAAGGATATGGGCTCG  
TGTGAGTAGGAAACAAAAAATATCTATTCTAGTTTTATCATCAGCTATGGGTTTCAATCTAAGAGAAATTCTAGAGAATG  
TTTGCTATCCTGAAATTTTTTTGTCTTTTCTGAATGATAAGGAG-----  
AGAAAAAAATTTGGGTCAAAGAGAATGCCATTTTAGAGTTTTATCAACAATTT-----GCTTGTGTAGGCGGAGAT--  
-CCGGTATTT---  
TCTGAATCCTTATGTAAGGAATTACAAAAAAATTTCTTTCAACAAAGATGTGAATTAGGACGGATTGGTCGACGAAATAT  
GAACCGAAGACTGAACCTTGATATCCCTCAGAACAACCCATTTTTGTTACCACGAGATATATTGGCAGCCGCCGATCATT  
TGATTGGACTCAAATTTGGAATGGGTACACTTGACGAT-----  
ATGAATCATTGAAAAATAAACGTATTCGTTCTGTAGCGGATCTTTTACAAGATCAATTCGGGTTGGCTCTGGTTCGTTT  
AGAAAATGCTGTTTCGAGGAAGTATATGTGGAGCAATTCGACATAAATTGATACCGACCCCT-----  
CAAAATTTGGTAACCTTCAACTCCA-----  
TTAACAACACTACTTATGAGTCTTTTTTTGGTTTACACCCATTATCTCAAGTTTTGGATGGAACCAATCCGTTGACACAAAT  
AGTTTCATGGGAGAAAATTGAGTTATTTGGGCCCTGGAGGACTAACAGGGCGAAGTCTAATTTTCGGATACGAGATATCC  
ATCCCAGTCACTATGGGCGTATTTGCCCAATTGACACATCTGAAGGAATTAATGTTGGACTTATTGGATCCTTATCAATT  
CATGCGAGGATTGGCCAT---TGGGGATTTCTAGAAAGCCCATTTTATGAA-----ATTTCT---GAGAGA-----  
-----CGGGTGCTTTTTTTATTGCGGGGTAGA-----GATGAATACTAT-----  
AAGGTAGCGGCAGGGAATCTTTGGCCTTAAATCAAGAT---ATTCAGGAAAAACAGGTTGTTCCA---  
GCTCGATACCGTCAAGAATTCCTGACTATTGCATGGGAACAGGTTTCATCTTCGAAGTATTTTCTTTTCCAATATTTTTC  
TATTGGAGCTTCCCTCATTCTTTTATTGAACATAATGATGCGAATCGGGCTTTAATGAGTTCAAATGCAACGTCAAG  
CAGTTCCCTTTCTCGATCCGAGAAATGCATTGTTGGAAGTGGGTTGGAACAACAAGCAGCTCTAGATTGAGGGGCTCTT  
TCTATAGCCGAACGAGAGGGAAAGGTCCTTTATACCGATACGGACAAAATCCTTTTATCAGGTAATGGG---GGT-----  
-----ACT-----  
CTAAGCATTCCATTAGTTATGTATCAACGTTCCAACAAAAATACTTGTATGCACCAAAAACCACGGGTTTCAGCGGGGT--  
----  
AAATGCATTAAAAAGGGACAAATTTTAGCCGATGCTGCTGCTACGGTTGGTGGCGAACTTTCTTTGGGAAAAAACGTATT  
AGTAGCTTATATGCCATGGGAAGGTTACAATTTGAAGATGCAGTACTCATTAGCGAGCGTTTAGTATATGAAGATATTT  
ATACTTCTTTTACATACGGAAATATGAAATTCAGACTCATGTGACAAGCCAAGGT---CCT---  
GAAAGGGTCACTAATGAAATACCCCACTTAGAAGCCCATTTACTCCGCAATTTAGACAAAAGCGGAATTGTGATGTTGGG  
ATCTTGGGTAGAAACGGGTGATATTTTAGTAGGTAATTAACGCCTCAGATGGTGAAAGAA---  
TCTTCTATGCCCCGGAAGATAGATTATTACGAGCCATACTTGGCATTGAGGATCTACTTCAAAGAAACTTGTCTAAA  
ACTACCTATAGGCGGTAGGGGTCTGGGTTATTGATGTGAGATGGATCCAGAAA---  
AAGGGGGGCTCTAGTTATAATCCAGAAATGATT---  
CGTGTATATATTTACAGAAACGTGAAATCAAAGTAGGCGATAAAGTAGCTGGAAGACACGGAAATAAGGGTATTATTTTC  
AAAAATTTTACTAGACAAGATATGCCTTATTTGCAAGATGGAAGACCTGTTGATATGGTCTTCAACCCACTAGGAGTAC  
CTTACGAATGAATGTTGGACAGATATTTGAATGTTTATTGGGGTTAGCGGGAAGTCTGCTAGACAGACATTATCGAATA  
GCGCCCTTTGATGAGAGGTATGAACAAGAAGCTTCGAGAAAACCTGGTGTCTTCTGAATTATATCAAGCTAGTAAGCAAAC  
AGCGAAT---  
CCATGGGTATTTGAAGCCGAGTATCCAGGAAAAAGCAGAATATTTGATGGAAGAACGGGGAATCCTTTTGAACAACCCGT  
TCTAATAGGAAAGCCTTATATCTTAAAATTAATTCATCAAGTTGATGATAAAAATCCACGGACGTTCAAGTGGACATTATG  
CACTTGTACACAGCAACCCCTTAGGGGAAGGGCAAAGCAGGGGGGACAACGGGTAGGAGAAATGGAGGTTTGGGCTCTA  
GAAGGGTTTGGTGTGCTCATATTTTACAAGAAATGCTTACTTATAAATCTGATCATATTAGAGCTCGCCAGGAAGTACT  
TGGTACTACGATCGTTGGAGGAACAATACCGAATCCTGAG-----  
GATGCTCCAGAATCTTTTTCGATTACTCGTTTCGAGAACTACGATCCTTAGCTCTAGAAGTAAACATTTTCTTATATCT--  
----GAGAAAAACTTC-----CGGATTCAT-----AGGAAGGAAGCT-----  
ATGATCGATAGGTAT-----  
AAACATCAGCAGCTCCGAATTGGATTAGTTTTCTCTCAACAAATAAGTGCTTGGGCTACTAAAATCCTGCCTAATGGAGA  
GATAGTTGGAGAGGTAACAAAACCTATACTTTTCATTAC-----

AAAACCAATAAACCGGAAAAGGATGGATTATTTTGTGAAAGAATTTTTGGACCTATTAAGTGAATTTGTGCTTGTGG  
AAATTAT-----CGAGTAATCGGAGATGAAAAAGAA---  
GACCCGAAATTTTGTGAACAGTGCAGGATCCAATTTGTTGATTCTCGGATACGAAGGTATCAAATGGGATACATCAA  
CGCATGCCCGGTAACCCATGTGTGGTATTTAAAACGTCTTCTAGTTATATTGCGAATCTTTTAGATAAATCCCTTAAAG  
AATTAGAAGGCCTAGTGTACTGCGAT-----  
TATCTCAATTTTTCTTTTGGTAGGCCATAACTAAAAACCCACT---TTCTTACGATTACGAGGT---  
TCATTCAAATAT-----GAGATCCAATCTTGAAATACAGCATCCCACTTTTTTTTACTACC-----  
-----

CAAGGCTTTGATACATTTTCGCAATCGAGAAATATCTACTGGTGCAGTTGCTATCCGAGAACAATTAGCAGATCTAGATTT  
GCGAATTATTCTAGAAAATTCGTTAGTAGAATGGAAAGAATTGGGGGAA-----  
GAGGGG-----CCCACA-----GGT-----AATGAA-----TGGGAGGATCGAAAAGTTGGA-----  
-----

AGAAGAAAGGATTTTTTGGTTAGACGTATGGAATTGACTAAGCATTTTATTTCGAACAAATATAGAACCAGAATGGATGGT  
TTTGTCTTATT

Cucumis

CTTTTTCTCGAAATATGGACCAATGGAAGTTAACTCCTAAAGAAGCACTTCATGAAGCCTCTCGGAATTTGATTGATTT  
ATTTATTCCTTTTTTACATGCGGAAGAAGAAAAAGAAAACCTCCAT-----TTAAAAATAATAAA---  
AAAAAAGTTACTTTACCCCTTTTTACTTTTTCATGAGAAA-----TTGGCG-----AAACTAAGG-----  
AAAAAGAAAAAGAAATAGCATTAAATATATTTTTATTGACCAATCAGAATTGCCTCCTAGGATCTATAATTGCCTCAA  
AAGGTGCAATATACATACATTATTTGACCTTTTGAATAATAGTCCAGACGAACCTATGAAAATCAAACATTTTTCGCATAG  
AAGACGTAAAACATATATTAGACATTCTC-----GAAATGGAAAAGAAT---TTTGCA-----  
-----  
-----ATGCTTGGGGGT---GGA---

AATGAGAGAATGTCTACAATACCTGCGTTTAAATCAGATACAATTTGAAGGGTTTTGTAGGTTTATTGATCATGGCTTAAC  
AGAAGAACTTTCTAAGTTTCCAAAAATTGAA-----  
GATACAGATCAAGAAATTGAATTTCAATTATTTGTGGAAACATATAAATTGGTAGAACATTGATAAAAAGAACGAGATGC  
TGTATATGAATCACTC---ACATATTCTTCTGAATTATACGTATCCGCAGGATTAATTTGGAAAACC-----  
CGTAGGGATATGCAAGAACAACAATTTTTATTGGAAACATTCCTCTAATGAATTCCTGGGAACCTCTATAGTAAATGG  
ACTATACCGAATTGTGATCAGTCAAATATTGCAAAGCCCCGGTATCTATTACCGGTGAGAATTGGACCAT---AACGGA-  
---ATTTCG---

GTCTATACCCGGCACCATATATCTGATTGGGGAGGAAGATTAGAATTAGAGATTGATCGAAAAGCAAGGATATGGGCTCG  
TGTGAGTAGGAAACAGAAAATATCTATTCTAGTTCTATCATCAGCTATGGGTTCTAAGAGAAATTCTCGAGAATG  
TTTGCTACCCTGAAATTTTTTTGTCTTTTCTGAATGATAAGGAG-----  
AAAAAAAATTTGGATCAAAAAGAAAATGCCATTTTGGAGTTTTATCAACAATTT-----TCTTGTGTAGGCGGAGAT--  
-CCGGTATTT---  
TCTGAATCCTTATGTAAGGAATTACAAAAGAAATCTTTCAACAAAGATGTGAATTAGGAAGGATTGGTCGACGAAATCT  
GAACCAGAGACTTAATCTTGATATACCTGAGAACAATACATTTTTGTTACAGCGAGATATATTGGCAGCTGCGGATCATT  
TGATTGGACTTAAATTTGGAATGGGTACACTTGACGAT-----

ATGAATCATTGAAAAATAAACGGATTCTGTTCTGTGCGGATCTCTTACAAGATCAATTCGGATTGGCTCTAGTTCTGTTT  
AGAAAATATGGTTAGAGGAACATATGTGGAGCAATTAGGCATAAATTGATACCGACTCCT-----  
CAGAATTTGGTAACCTCAACTCCA-----  
TTAACAACCACATTTGAATCTTTTTTTCGGATTACACCCATTATCTCAAGTTTTAGATCGAACTAATCCATTGACACAAAT  
AGTTCATGGGCGAAAATTTGAGTTATTTGGGCCAGGAGGATTGACAGGGCGAAGTCTAGTTTTTCGGATACGAGATATCC  
ATCCTAGTCATTATGGACGCATTTGCCCAATTGACACGTCTGAAGGAATTAATGTTGGACTTATTGGATCATTAGCAATT  
CATGCAAGGATTGGTCAT---TGGGGATCTCTAGAAAACCTCATTATGAA-----ATTTC---GAGAGATCAAAA--  
-----AAAGTGCGGATGCTTTATTTATCACCAAGTCTGA-----GATGAATACTAT-----  
ATGGTAGCGACAGGAAATTTCTTTGGCACTGAATCCAGGT---ATTGAGGAAGAACAGATTGTTCCA---

GCTCGATACCGTCAAGAATTTCTTTGACTATTGAATGGGAACAAGTTCATCTTCAAGTATTTTTCCCTTCCAATATTTTTCT  
TATTGGAGCTTCCCTCATTCTTTTTATCGAACATAATGATGCGAATCGTGCTTTAATGAGTTCTAATATGCAACGTCAAG  
CAGTCCCCTTTCTCGGTCCGAAAAGTGCATTGTTGGAAGTGGGTTGGAACGCCAAGTGGCTCGAGATTCAGGGGTTGCC  
GCTATAGCCGAACACGGGGGAAAGATCATTATACCGATACTGACAAGATCATTTTTTTTCGGGCAATGGA---TAT-----  
-----ACT-----

CGAAGAATTCATTAGTTATGTATCAACGTTCTAACAATACTTGTATGCAGCAAAAATCCAGGTTACCAGGGT---  
-----

AAATGCATAAAAAAGGGCAAATTTTAGCGGACGGTGCTGCTACAGTTGGTGGCGAAGTCTGTTTTGGGAAAAACGTATT  
AGTAGCTTATATGCCATGGGAAGGTTACAATTTTGAAGATGCGGTAATAATTAGCGAGCGTTTTGATATATGAAGATATTT  
ATACTTCTTTCCACATACGGAATATGAAATTCAACTCATGTGACAAGCCACGGA---CCT---

GAAAGAATCACTAACGAAATACCACATCTAGAAGCCCCTTACTCTGTAATTTAGACAAAAATGGAATTGTTATGCTGGG  
ATCGTGGGTGGAGACGGGCGATATTTTAGTAGGTAAATTAACGCCTCAGATGGCGAAAGAA---  
TCATCGTATGCCCCGGAAGATAGATTATTACGAGCCATACTTGGCATTCCAGGTATCCACTTCAAAGAAACCTGTCTAAA  
ACTACCTATCGGCGGTAGGGGTTCGAGTTATTGATGTGAGATGGATCCAGAAA---  
AAAGGGGGTTCGAGTTATAATCCAGAAATTATT---  
CGTGTATATATTTTACAGAAACGTGAAATCAAAGTAGGCGATAAGGTAGCGGGAAGACATGGAAATAAAGGTATTGTTTC  
AAAAATTTTGGCCAGAGAAGATATGCCTTATTTGCAAAATGGAAGACCTGTTGATATGGTTTTCAATCCATTAGGAGTCC  
CCTCACGAATGAATGTAGGACAGATATTTGAGTGCTCACTCGGGTTAGCGGGGAGTTTGCTAGATAGACATTATCGAATA  
GTACCTTTTGATGAGAGATATGAACAAGAGGCTTCTAGAAAACCTAGTCTTTTCTGAATTATATGAAGCCAGTAAGCAAAC  
AGCGAAGTCCCCATGGGTATTTGAACCCGAGTATCCGGGAAAAAGCAGAATATTTGATGGAAGAACGGGAAATCCTTTTG  
AACAACTGTTATAATAGGAAGCCTTATATCTTGAATTAATTCATCAAGTTGATGATAAAATACACGGACGTTCCAGT  
GGACATTATGCACCTGTTACACAACAACCCCTTAGAGGAAGGGCCAAGCAAGGTGGACAACGGGTGGGAGAAATGGAGGT  
TTGGGCTCTAGAAGGATTTGGGGTTGCTCATATTTTACAAGAGATGCTTACTTATAAATCTGATCATATTAGAGCTCGGC  
AAGAAGTACTTGGTACTACGATCATTGGAGGAACAATACCTAAACCCGAG-----  
GATACTCCAGAATCTTTTCGATTGCTCGTTTCGAGAATTACGATCTTTGGCTTTGGAACCTGAATCATTTTCCTTGTATCT--  
----GAGAAGAACTTC-----CAGATTAAT-----AGGAAGGAAGCT-----  
ATGAATCAGAAAATTTTTTCTATGATCGATCGGTAT-----  
AAACATCAACAACCTCCGAATTGGATTAGTTTTCTCTCAACAAATAAGTGCTTGGGCCAATAAACTCTACCTAATGGCGA  
GATAGTTGGAGAGGTAACAAAACCTATACTTTTCATTAC-----  
AAAACCAATAAACCTGAAAAAGATGGATTATTTTGTGAAAGAATTTTTGGGCCTATAAAAAGCGGGATTTGTGCTTGTGG  
AAATTAT-----CGAGTAATCGGAGATAAAAAAGAA---  
GATTTCGAAATTTTGTGAACAATGCGGAGTCGAATTTGTTGATTCTCGGATACGAAGATATCAAATGGGCTATATTAACCT  
GGCATGCCAGTAACCCATGTGTGGTATTTAAAACGCTCTTCTAGTTATATCGCGAATCTTTTAGATAAACCTCTTAAAG  
AATTAGAAGGCTTAGTATATTGCGAT-----  
TTTTCTTTTGTAGGCCCATAGCTAAAAACCTACT---TTCTTACGATTACGGGGT---TCATTTCGAATAT-----  
-GAAATCCAATCCTGGAAATACAGCATCCCACTTTTTTTTACTACC-----  
CAAGGCTTCGATACATTTTCGAAATCGAGAAATTTCTACCGGAGCAGGTGCTATACGAGAACAATTAGCCGATCTGGATTT  
GCGACTTATTATAGATTATTTGTTGTTAGAATGGAAAGAATTAGGCCGAA-----  
GAAGGA-----CCCGA-----GGT-----AATGAA-----TGGAAGATCGCAAAGTTGGA-----  
----

AGAAGAAAGGATTTTTTGGTTAGACGTATGGAATTAGCTAAGCATTTTATTTCGAACAAATATAGAACCCGAATGGATGGT  
TTTATGTCTATT

Daucus

CTCTTTCTTGAAATATGGACAAATGGAAGTTAACTCCTAAAGAAGCACTTCATGAAGCCTCCCGGAATTTGATTGATTT  
ATTTATTCTTTTTTACACACGGAAGAA-----GAAACTTACAT-----TTAGCGAACAATCAA---  
CACATGGTCCCTTTACCCCTTTTACCTTTTCATGATAAA-----TTGGAT-----AAACTAAGA-----  
AAAAACAAAAAAGAGCATTGAAATCGATTTTTATTGACCAATCAGAACTACCTCCAGGATCTATAATTGCCTTAA  
AAGGTCCAATATATATACATTATTGGACCTTTTGAATAACAGTCAAGAAGACCTTATGAAAATTGAACATTTTCGCATAA  
AGGATGTAAAACAGATATTGGGCATTCTA-----GAAAAGAATTTCTCA---  
ATTAATTTAGGGAAAAAGCCGAAATGGGTTTTGAATCTTTA-----  
-----ATGCTCCGAGAT---GGA---  
AATGAGGGAATGTCTACAATACCTGGCTTTAATCAGATACAATTTGAAGGATTTTGTAGGTTTCATGGATCAGGGCTTGAC  
GGAAGAACTTTATAAGTTTCCAAAATTGAA-----  
GATACCGATCAAGAAATTGAATTTCAATTATTTGTGGAAACATATCAATTAGTAGAACCGTTGATAAAAAGAAAGAGATGC  
TGTGTATGAATCACTC---ACATATTCTTCTGAATTCTATATATCCGCGGGACTCATTGGAAAACC-----  
AGTAGGGATATGCAAGAACAACCTATTTTTCTTGGAAACATTCCTCTAATGAATCTCTGGGAACTTCTATAGTAAATGG  
AATATATAGAATTTGTGATCAATCAAATATTGCAAAGTCCCGGTATTTATTACCGGTGAGAATTGGATCAT---AATGGA-  
--ATTTG---  
GTATATACCGGCACCATAATATCGGATTGGGGAGGAAGATTAGAATTAGAGATTGATAAAAAAGCAAGGATATGGGCTCG  
TGTGAGTAGGAAACAAAAATATCTATTCTAGTTCTATCATCGGCTATGGGTTGGAATCTAAGAGAAATTCTAGAGAATG  
TTTGCTATCCTGAAATATTTTTATCTTTTCTAACTGATAAGGAA-----  
AAAAAAAATAGGGTCAAAGAAAATGCCATTTTGGAGTTTTACCAACAATTT-----GCTTGTGTAGGCGGGGAT--  
-CCGGTATTT---  
TCTGAATCCTTATGTAAGGAATTACAAAAGAAATCTTTCAACAAAATGTGAATTAGGAAAGATTGGTCGACGAAATAT  
GAATCGGAGATTGCGCTTGTATATATCCAGAACAATACATTTTTGTTACCGCGAGATATATTGGCAGCCGCGGATCATT  
TGATTGGAATGAAATTTGGAATGGGTACACTTGACGAT-----  
ATGAATCATTGAAAAATAACGCATTCTGTTCTGTAGCAGATCTTATACAAGATCAATTAGGATTGGCTCTGGTTCGTTT

AGAAAATATGATTTCGAGGAACCTATAGGTGGAGCACTTAGGCATAAATTGATAACCGTCTCCT-----  
CAGAATTTGGTAACTTCAACTCCA-----  
TTAACAAGTACTTATGAATCTTTTTTCGGTTTACACCCATTATCTCAAGTTTTAGATCGAACTAATCCATTGACACAAAT  
AGTTCATGGGAGAAAATTGAGTTATTTGGGCCCTGGAGGATTGACAGGGCGAACTGCTAGTTTTCGAATACGAGATATCC  
ATCCTAGTCATTATGGGCGTATTTGCCCAATTGACACGTCTGAAGGAATAAATGTCGGACTTATTGGATCTTTAGCAATT  
CATGCGAAGATTGGTCGT---GGAGGATCTCTAGAGAGTCCATTTTATGAG-----ATTTCT---CAGAGATCAAAA--  
-----GGGGCACGGATGCTTTATTTATCACCAGGTAAA-----GATGAATACTAT-----  
ATGGTAGCGGCGGGAAATCCTTTGGCTTTGAATCAGGGT---CTTCAGGAAGAACAGGTTGTTCCA---  
GCTAGATATCGTCAAGAATTCCTGACTATTGCATGGGAACAGGTTTCATCTTCGAAGTATTTTTCTTCCAATACTTTTC  
TATTGGAGCTTCCCTCATTCTTTTATCGAGCATAATGATGCGAATCGGGCTTTAATGAGTTCGAATATGCAACGTCAAG  
CAGTTCCTCTTTCTCGATCCGAGAAGTGTATTGTTGGAACGGGTTGGAACGCCAGGCGGCTCTAGATTTCAGGGGTTCTT  
GCTATCGCCGAACATGAAGGAAAGGTCATTTATACCATACTGACAAGATCCTTTTATCGGGTAATGGA---GAT-----  
-----ACT-----  
CTAAACATTCCATTAGTTATGTATCAACGTTCCAACAAAAATACTTGTATGCATCAAAAACCCAGGTTTCAGAGGGGT--  
----  
AAATACATTAATAAAGGACAAATCTTAGCCTATGGCGCCGCTACAATTGGTGGCGAACTCGCTTTGGGGAAAAACGTATT  
AGTAGCTTATATGCCGTGGGAAGGTTACAATTTGAAGATGCAGTGTCTATTAGCGAGCGTTTTGGTTTTATGAAGATATTT  
ATACTTCTTTTACATACGAAAATATGAAATTCAACTCATGTGACAAGCCAAGGC---CCC---  
GAAAGGGTCACTAGGGAAATACCGCATTTAGAAGCTCATTACTACGCAATTTAGACAAAAACGGAATTGTAATGCTGGG  
ATCTTGGGTAGAAACGGGTGAGATTTTAGTAGGTAATTAACGCCCAAATGGTGAAAGAA---  
TCGTGATGCCCCGGAGGATAGATTGTTACGAGCCATACTTGGCATTTCAGGTATCTACTTCAAAGAAACTTGTCTAAA  
ACTACCTATAGGCGGTAGGGGTGAGTTATTGATGTGAGATGGATCCAGAAA---  
AGGGTAGGTTCTAGTTATAATCCAGAAACGATT---  
CGTGTATATATTTTACAGAAACGTGAAATTAAGGTAGGCGATAAAGTAGCTGGAAGACATGGAAATAAGGGTATAATTC  
AAAAATTTTGCCTAGACAAGATATGCCTTATTTGCAAGATGGAAGACCTGTTGATATGGTCTTCAACCCATTAGGAGTAC  
CTTCCCGAATGAATGTAGGACAGATATTTGAATGTTCACTCGGGTTAGCTGGGGGTCTACTAGACAGACATTATCGAATA  
GCCCCTTTTGATGAAAGATATGAACAAGAAGCTTCGAGAAAACCTAGTGTCTTCTGAATTATATCAAGCCAGTAAGCAAAC  
GGCGACT---  
CCATGGGTATTTGAACCCGAGTATCCGGGAAAAAGCAGAATATTTGATGGAAGAACGGGGGATCCTTTTGAACAACCTGT  
TATAATAGGAAAGCCTTATATCTTGAATTAATTCATCAAGTTGATGATAAAATCCATGGACGGTCCAGCGGACATTATG  
CACTTGTTACACAACAACCCCTCAGAGGAAGGGCTAAGCAAGGTGGGCAGCGGGTAGGAGAGATGGAGGTTTGGGCTCTA  
GAAGGATTTGGTGTTGCTTATATTTTACAAGAGATGCTTACTTATAAATCGGATCATATTAGAGCTCGCCAGGAAGTACT  
TGGTACTACTATCATTGGAGGAGCAATACCTAATCCTGAG-----  
GATGCTCCAGAATCCTTTTCGATTACTCGTTCGAGAACTACGATCTTTGGCTCTGGAACCTGAATCATTCTTTGTATCT--  
----GAGAAAACCTTTC-----AAGATTAAT---AGGAAGGAAGCT-----  
ATGAATCCCAACTTTTCTTCTATGATTGATCAGTAT-----  
AAACATCAACAACCTCCGAATTGGATCAGTTTCTCCTCAACAAATAAGTACTTGGGCGAATAAAATCCTCCCTAATGGAGA  
GAGAGTTGGAGAGGTGACAAAACCTTATACTTTTCATTAC-----  
AAAACCAATAAACCAGAAAAGATGGATTATTTGTGAACGCATTTTTGGGCCTATCAAAGTGAATTTGTGCTTGTGG  
AAATTAT-----CGAGTAATCGGAGATAAAAAAAAAA---  
GACCGGAAATCTTGTGAACAATGCGGGGTCGAGTTTGTGATTCTCGGATACGAAGATATCAAATGGGCTACATCAAAC  
CGCATGCCAGTAACCCACGTGTGGTATTTGAAACGTCTTCTAGTTATATTGCGAATCTTTTATAGATAAACCTCTTAAAG  
AATTAGAAGGCCTAGTATACTGCGAT-----  
TTTTCTTTTGTAGGCCCATAGCTAAAAAACCCACT---TTTTTACGATTACGAGGT---TTGTTGCAATAT-----  
-GAAATCCAATCCTGGAAATATAGCATCCCGCTTTTTTTTACTACC-----  
CAAGGCTTTGATACATTTGAAATCGAGAGATCTCTACTGGAGCAGGTGCTATCCGAGAACAATTAGCCGATCTCGATTT  
ACGGATTATTATAGATTTCTTATTGGTGAATGGAAAGAGTTGGGGGAA-----  
GACGGT-----CCCACA-----GGG-----AATGAG-----TGGGAAGATCGAAAAGTTGGA-----  
----  
AGACGAAAGGATTTTTTGGTTCAGACGTATGGAATTAGCGAAGCATTTTTATTCGAACAAATATAGACCCAAAATGGATGGT  
TTTGTGTCTATT  
Dioscorea  
CTTTTTCTAGAAATATGGACAAATGGAAGTTAACTCCTAAAGAAGCACTTTATGAAGCTTCTCGTAATTTAATTGATTT  
ATTTGTTCTTTTCTCCATGCAGAGGAA-----GAAGACATTAAT-----TTCGAGGAAAATAAA---  
AACAAGTTTACTTTACCCCTTTGACCTTTCAAGATAGA-----TTATCT-----AATCTAAAG-----  
AAAAACAAAAAGGGAATTCATTGAAATATATTTTTTATTGACCAATTAGAATTGCCTTCCAGGACCTATAATTGTCTCAA  
AAGGTCCAATATACATACATTATTGGACCTTTTGGTAAGGGTCAAGAAAATCTTATAAAAATGGAATATTTTTCACATAG

AAGATGTA AACAGATATTGGACTCTA-----CAGAAGCATT TTTGCA---GTTGATTTACCTAAAGTT---  
TTAATT-----  
-----ATGATTCGGGAT---GGA---  
AATGAGGGAATGTACACAATACCTGGATTTAATCAGATCCAATTTGAGGGATTTTGTAGGTTTATTAAATCAGGGCTTGAT  
GGAAGA ACTTCATAAGTTTCCAAAAATTGAA-----  
GATACAGATCAAGAAATTGAATTTCAATTATTTGTGGAAACATATCAATTGGTAGAACCTTGATAAAAGAAAGAGATGC  
TGTGTATGAATCACTC---ACATATTCTTCTGAATTATATGTACCCGCGGGATTAATTTGGAAAACG-----  
AGTAGAGCTATGCAAGAACAACCATTTTTATTGGAAACATTCTTTAATGAATTCGTTGGGAACTTCTATAATAAATGG  
AATATACAGAATTGTAATCAATCAAATATTGCAAAATCCCGGTGTTTACTACCGTTT CAGAATTAGACCAT---AACGGA-  
--ATTTCT---  
GTCATACCAGTACTATAATATCAGATTGGGGAGGACGATTGGAATTAGAAATTGATAGAAAAGCCAGGATATGGGCGCG  
TGTGAGTAGGAAACA AAAAATATCTATTCTAGTTCTATTATCGGCTATGGGTTT CGAATCTAAGAGAAATTCTAGATAATG  
TTTGTTACCCTGAAATTTTCTTGTCTTTCCCAAATGATAAGGAA-----  
AAAAAAAAGATTGGGTCAAAGAAAATGCTATTTTGGAGTTTATCAACAATTT-----GCTTGTGTAGGGGGGGAT--  
-CCCGTATTT---  
TCTGAGTCCTTATGTAAGGAATTACAAAAGAAATTTTTTCAACAAAGATGTGAATTAGGAAGGATTGGTCGACGAAATAC  
GAACCAGAGACTGAATCTCGATATACCCCAGAAGAATACATTTTTTGTACCACGAGATGTATTAGCTGCTGCGGATCATT  
TGATCCGAATGAAATTTGGAATGGGTACGCTTGACGC-----  
ATGAATCACTTGAAAAATAAACGTATTCGTTCTGTAGCGGATCTGTTACAGGATCAATTCGGATTGGCTCTTGTTCGTTT  
AGAAAATGGGGTTCGAGGAACTATATGTGGGGCAATCAGGCATAAATTGATACCGAATCT-----  
AAAAATTTGGTA ACTTCAACTTCA-----  
TTTACAACCACTTATGAATCGTTTTTTCGGCCTACACCCTTATCTCAAGTTTTGGATCGGACTAATCCATTGACCCAAAT  
TGCTCATGGGCGTAGGCTGAGTTATTTGGGTCCTGGGGGGTTGACAGGGCGA ACTGCTAGTTTTCGGATACGAGATATCC  
ATCCTAGTCACTATGGACGATTTGCCCAATTGATACGTCTGAAGGAATCAATGTTGGACTTATTGGATCTTTAGCTATT  
CATGTAAGGATTGGTCAT---TGGGGATCTATAGAGAGTCCCTTTTATGAA-----ATATCT---GAGAGATCAAAA--  
-----AAGGCACAGATGATTTATTTATCGCCAAGTAGA-----GATGAATATTAT-----  
ATGGTAGCAGCAGGAAATCTTTGGCCTTGAACCGGGGT---ATTCAGAAGAACAGGTTGTGCCA---  
GCTCGATACCGTCAAGAATTCCTA ACTATTGCATGGGAACAGATTCATCTTAGAAGCATTTTCCCTTCCAATATTTTTCT  
TATTGGAGCTTCTCTCACTTCTTTTATTGAGCATAATGATGCAAACTCGAGCTTTAATGAGTTCTAATATGCAACGTCAAG  
CAGTTCGGCTTTCTCGATCGGAAAAGTGTATTGTTGGA ACTGGACTGGAACGTCAAACGGCTCTAGATTCTGGGGTTTCA  
GCTATAGCCGAACGGGAGGAAAGATCATTTATACTGATACTCACAAGATCATT TTTCTCAAGTAATGGA---GAC-----  
-----ACT-----  
ATGAGCATTCCATTAGTTATGTATCAACGTTCTAACAAAAATACTTGTATGCATCAAAAACCTCAGGTTCCGAGGGGT--  
----  
AAATGCATTAAAAAGGGACAAATTTTAGCAGACGGTGC GACTACAGTTGGTGGGGA ACTCGCTTTAGGAAAAAACGTATT  
AGTAGCTCATATGCCATGGGAAGGTTACAATTCTGAAGACGCAGTACTAATTAGTGAACGTTTAGTATATGAAGATATTT  
ATACTTCTTTTTACATTCGGAATATGAAATTCAGACTCATGTGACAAGCCAAGGT---CCT---  
GAAAGAATCACTAAGGAAATACCACATTTAGAGGATCACTTACTCCGCAATTTAGACAGAAATGGAATTGTGATGCTTGG  
ATCTTGGATAGAAACAGGTGATATTTTAGTAGGTAATTAACGCCTCAGACAGCGACCGAA---  
TCGTGCTATGCTCCGGAAGATAGATTATTACGAGCCATACTCGGCATT CAGGTATCCACCGCAAAGAACTTCTCTAAA  
ATTATCTATAGGTGGAAGGGGTCGAGTTATTGATGTGAGATGGATT CAGAAA---  
AGGGGTGGTTCCATTTATAATCCAGAAATGATT---  
CGTGTATATATTTCAAAAAACGTGAAATCAAAGTAGGTGATAAAGTAGCTGGAAGACATGGGAATAAAGGTATCATTTCT  
CAAAATTTTGCCTAGGCAAGATATGCCCTATTTGCAAGATGGAACACCTGTTGATATGGTCTTCAACCCATTAGGAGTAC  
CCTCACGAATGAATGTAGGACAGATATTTGAATGCTCGCTCGGGTTAGCGGGGGATCTGCTAAAAAGACATTATAGAATA  
GCACCTTTTGATGAGAGATATGAGCAAGAGGCTTCGAGAAA ACTAGTATTTTCTGAATTATATT CAGCCAGTAAGCAAAC  
AAAAAAT---  
CCATGGGTATTTGAACCCGAGTATCCGGGAAAAAGCAGAATATTTGATGGAAGAACGGGGGATCCTTTTGAACAACCTGT  
TCTAATAGGAAAACCTATATCTTGA AATTAATCCATCAAGTTGATGATAAAATCCATGGGCGTTCCAGTGGACATTACG  
CACTTGTTACACAACAACCCCTTAGAGGAAGGGCCAAGCAAGGGGGACAACGAGTAGGAGAAATGGAAGTTTGGGCTCTA  
GAGGGATTTGGTGTGCTCATATTTTACAAGAGATGCTTACTTATAAATCTGATCATATTAGAGCTCGTCAAGAGGTACT  
TGGTGCTACAATTGTTGGAGGAACAGTACCTAACCCCGAA-----  
GATGCTCCAGAATCCTTTTCGATTGCTCGTTTCGAGA ACTACGATCTTTGGCTCTGGA ACTGAATCATTTTCTCGTATCT--  
----GAAAAGAATTTCT-----CAGATTAAT-----AGGAAGGAAGCT-----  
ATGATCGACCAGTAT-----  
AAACATCAACA ACTTCGAATTGGACCAGTTTCTCTCAACAAATAAGGGCTTGGGCTAACAAAATACTACCTAATGGAGA  
GATAATTGGT GAGGTGACAAAACCGTATACTTTTCATTAC-----



AAAACCAATAAACCGGAAAAAGATGGATTGTTTTGTGAAAGAATCTCTGGACCTATAAAAAAGTGGAAATTTGTGCTTGTGG  
AAATTAT-----CGAGTGATTGGGGCTGAAAAAGAA---  
GACCCGAAGTTTTGTGAACAATGCGGGGTGGAGTTTTGTTGATTCTCGGATACGAAGATATCAAATGGGATACATCAAAC  
CGCATGCCAGCGACTCATGTGTGGTATTTGAAACGTCTTCTAGTTATATCGCGAATCTTTTAGATAAACCCCTTAAGG  
AATTAGAAGGCCTAGTATACTGTGATGTG-----  
TTTTCTTTTGTAGGCCTATATCTAAAAACCAACT---TTCTTACGATTACGAGGT---TCATTCGAGTAT-----  
-GAAATCCAATCCTGGAAATACAGCATCCCACTTTTTTTTACTAAT-----  
CAAAGCTTCGAGACATTTGAAATCGAGAAATCTCGACAGGAGCAGGTGCTATTAGAGAACAATTAGCCGATTCCGGATTT  
GCAAATTATTCTAAATAATTCATTGGTAGAATGGAAGGAATTAGGAGAT-----  
GAGGAG-----GTGATTGGAAGTGA-----AATGAA-----TGGGAAGATAGAAAAATTAGA-----  
-----  
AGAAGAAAGGATTTTTTGGTTAAACGCATGGAATTAGCTAAACATTTTATTGAAACAAATGTAGAACCAAACGGATGGT  
TTTGTGCCTATT

Drimys

CTTTTTCTAGAAATATGGACGAATGGAAGTTAACTCCTAAAGAAGCACTTCACGAAGCTTCCATAATTTGATTGATTT  
ATTTATTCTTTTCTACATGGGGAGGAA-----GAGGACATCAAT-----TTAGAGGACAGTCTA---  
AACAGGGGTACTTTACCTTTTTTTTACCTTTTACAGGATAAA-----TTGGCT-----AATCTAAGG-----  
AAAAACAAAAAAGCAATTGCATTGGAATGTATTTTTATTGACCAATCAGAATTGCCTCCAGAACCTATAATTGTCTCAA  
AAGGTCCAATATACATACATTATTGGACCTTTTGGAGTAACAGTCAAGAAGATCTTATGAGAATTGAACATTTGCGCATAG  
AAGATGTA AACCGGATATTGGACATTCTA-----CAGAAGCATTTTACA---ATTGATTTACCTAAGAAT---  
AAGTT-----  
-----ATGCTCCGGGAT---GGA---  
AATGAGGGAATGTTTACAATACCTGGATTTAGTCAGATACAATTTGAGGGATTTTTTAGGTTTATTGATCAGGGCTTGAC  
GGAAGAACTTCATAAGTTTCCAAAAATTGAA-----  
GATACAGATCAAGAAATTGAATTTCAATTATTTGTAGACACATATCGATTGGTTCGAACCCTTGATAAAAGAAAGAGATGC  
TGTGTATGAATCACTC---ACATATTCTTCTGAATTATATGTACCCGCAGGATTAATTTGGAAAAC-----  
GGTAGAGATATGCAAGAACAACCATATTTATTGGAAACATTCCTCTAATGAATTCCTTGGGAACCTCTATAGTAAATGG  
AATATACAGAAATTGTGATCAATCAAATATTGCAAAGTCCCGGTATTTATTACCGTTTCAAGAAATTGGACCAT---AACGGA-  
---ATTTCT---  
GTCTATACCGGTAGCATAATATCAGATTGGGGAGGAAGATCAGAATTAGAGATTGATAGAAAAGCAAGGATATGGGCCCG  
TGTGAGTAGGAAAACAAAAAATATCTATTCTAGTTCCATCATCAGCTATGGGTTTCGAATCTAAGAGAAATTCTAGATAATG  
TTTGCTACCCTGAAATTTTCTTGTCTTTCCCGAATGAAAAGGAG-----  
AAAAAAAAGATTGGGTCAAGGGAAAATGCCATTTTGGAGTTTTATCAACAATTT-----GCTTGTGTAGGTGGGGAT--  
-CCGGTATTT---  
TCTGAGTCCTTATGTAAAGAATTACAAAAGAAATTTTTTCAACAAAGATGTGAATTAGGAAGGATTGGTTCGACGAAATAT  
GAACTGGAGATTGAATCTTGATATACCTCAGAACAATCTATTTTTGTTACCACGAGATGTATTGGCTGCTGCGGATCATT  
TGATCGGAATGAAATTTGGAATGGGCACCCTTGACGAT-----  
ATGAATCACTTGAAAAATAAACGTATTCGTTCTGTAGCAGATCTGTTACAGGATCAATTCGGATTGGCTCTGGTTCTGTT  
AGAAAATGTGGTTCGAGGAACTATATGTGGAGCAATCAGGCATAAATTGATACCGACTCT-----  
CATAATTTGGTAACTTCAACTCCA-----  
TTAACAACACTTATGAATCGTTTTTTCGGCCTACACCCTTTATCTCAAGTTTTGGATCGAACGAATCCATTGACACAAAT  
AGTTCATGGGCGAAAATCGAGTTATTTGGGTCTGGAGGATTGACAGGACGAACCTGCTAGTTTTTCGGATACGAGATATCC  
ATCCTAGTCACTATGGGCGTATTTGCCCAATTGACACGTCCGAAGGAATCAATGTTGGACTTATTGGATCTTTAGCTATT  
CATGCGAGGATTGGTTAT---TTGGGTCTATAGAGAGTCCGTTTTATGAA-----ATATCT---CAGAGATCAAAA--  
-----GAGGTACAGACGGTTTTATTTATCACCAAAATAGA-----GATGAATATTAT-----  
ATGGTAGCAGCGGGAAATCTTTGGCGTTGAATCAGGGT---ATTGAGGAAGAACAGGTTGTTCCA---  
GCTCGATACCGTCAAGAATTCCTGACTATTGCATGGGAACAGATTATCTTTCGAAGCATTTTTTCCCTTTCCAATATTTTTTC  
TATTGGAGCTTCCCTCATTCTTTTTATCGAGCATAATGACGCGAATCGAGCTTTAATGAGTTTCAATATGCAGCGTCAAG  
CAGTTCCGCTTTCTCGGTCCGAGAAGTGCATTGTTGGAAGTGGGTTGGAACGACAAGCGGCTCTAGATTCCGGGGTTTCA  
GCTATAGCCGAACAAGATGGAAGATCATTTATACTGATACTGACAAGATCGTTTTTATCAGGTAATGGA---GAC-----  
-----ACT-----  
GCCATAAGCATTCCATTGGTTATATATCAACGTTCCAACAAAAATACCTGTATGCATCAAAAACCTCAGGTTCCGCGGGG  
T-----  
AAATGCCTTAAAAAGGGACAAATTTTAGCGGACGGTGC GGCTACAGTTGGTGGTGAACCTCGCTTTGGGAAAAAACGTATT  
AGTGTCTTATATGCCATGGGAAGGCTACAATTTTGAAGACGCGGTACTCATTAGTGAACGTCTAGTATATGGAGATATTT  
ATACTTCTTTTACATCCGAAATATGAAATTCAGACTCATGTGACAAGTCAAGGC---CCT---  
GAAAGAATCACTAATGAAATACCGCATTTAGAAGCCCATTTACTCCGCAATTTAGACATAAATGGAATTGTGATGTTGGG

ATCTTGGATAGAAAACAGGTGATATTTTAGTAGGTAAATTAACGCCTCAGACAGCAAAAAGAA---  
TCATCGTATGCCCCGGAAGATAGATTATTACGAGCCATACTTGAATTCCAGGTATCCACTGCAAAGGAACTTGTCTAAA  
ATTACCTATAGGCGGAAGGGGTCGAGTTATTGATGTGAGATGGATCCAGAAA---  
GGGGGGGGTTCCAGTTATAATCCAGAAATGATT---  
CGTGTATATATTTTACAGAAGCGTGAAATCAAAGTAGGTGATAAAGTAGCTGGAAGACATGGGAATAAAGGTATCATTTC  
CAAAATTTTGCCTAGACAAGATATGCCTTATTTGCAAGATGGAACACCGGTTGATATGGTCTTCAACCCATTAGGAGTAC  
CTTCGCGAATGAATGTGGGACAGATATTTGAATGCTCGCTCGGGTTAGCGGGGGACCTGCTGGACAGACATTATAGAATA  
GCACCCTTCGATGAGAGATATGAGCAAGAGGCTTCGAGAAAAGTAGTGTTCCTGAATTATATGAAGCCAGTAAGCAAAC  
AGCAAAT---  
CCATGGGTATTTGAACCCGAGTATCCGGGAAAAAGCAGAATATTTGATGGAAGAACAGGAGATCCTTTTGAACAACCTGT  
TATAATAGGAAAGTCTTATATCTGAAATTAATTCATCAAGTTGATGATAAAATCCATGGACGCTCCAGTGGACATTATG  
CACTTGTACACAACAACCCCTTAGAGGAAGGGCCAAGCAAGGGGGACAACGAGTAGGAGAAATGGAAGTTTGGGCTCTA  
GAGGGATTTGGTGTGCTCATATTTACAAGAGATGCTTACTTATAAATCTGATCATATTAGAGCTCGTCAGGAAGTACT  
TGGTACTACGATCATTGGAGGAACAATACCTAACCCCGAG-----  
GATGCTCCAGAATCTTTTCGATTACTCGTTCGAGAACTACGATCTTTGGCTCTGGAAGTGAATCATTTCCTTGTATCT--  
----GAGAAGAAGTTC-----CAGATTCAT-----AGGAAGGAAGCT-----  
ATGATCGACAGGTAT-----  
AAACATCAACAACCTCCGAATTGGATCAGTTTTCTCTCAACAAATAAGTGCTTGGGCTAACAAAATACTACCTAATGGAGA  
GATGGTTGGAGAGGTGACAAAACCTATACTTTTCATTAC-----  
AAAACCAATAAACCGGAAAAAGATGGATTGTTTTGTGAAAGAATTTCTGGACCTATAAAAAGTGAATTTGTGCTTGTGG  
AAATTAT-----CGAGTGATCGGAGATGAAAAAGAA---  
GACCCGAAATTTTGTGAACAATGCGGAGTCAATTTGTTGATTCTCGGATACGAAGATATCAAATGGGATACATCAAAC  
GGCATGTCCAGTGACTCATGTGTGGTATTTTAAACGTCTTCTAGTTATATCGCGAATCTTTTAGATAAACCCCTTAAGG  
AATTAGAAAGCCTAGTATACTGCGAT-----  
TTTTCTTTTGTAGGCCCATAGTTAAAAAACCGACT---TTCTTACGATTACGAGGT---TCATTGCAATAT-----  
-GAAATACAATCCCGGAAATATAGCATCCCACTTTTTTTTACTACC-----  
CAAGGCTTCGATACATTTGAAATCGAGAAATCTCTACTGGAGCAAGTGCTATCAGAGAACAATTAGCCGATCCAGATTT  
GCCAATTATTACAGATCATTTCATTGGTGAATGGAAGGAATTAGGGGAA-----  
GAAGGG-----TCCGCT-----GGG-----AATGAA-----TGGAAGATAGAAAAATTGGA-----  
----

AGAAGAAAGGATTTTTTGGTTAGACGCATGGAATTAGCTAAGCATTTTATTTCGAACAAATGTAGAACCAGAACGGATGGT  
TTTGTGCCTATT

Eucalyptus

CTTTTTCTCGAAATATGGACAAACGGAAGTTAACTCCTAAAGAAGCACTTCATGAAGCCTCCCGGAATTTAATTGATTT  
ATTTATTCTTTTCTACATGCAGAAGAA-----GAAACTTACAT-----TTAGAGAACAATCAG---  
TACAAGGTTACTTTACCCTTTTTTACTTTTTCATGATAGG-----TTGGCT-----AAGCTAAGG-----  
AAAACGAAAAAAGAAATAGCATTGAAATCCATTTTTATTGACCAATTCGAATTGCCTCCAGGACCTATAATTGCCTCAA  
AAGGTACAATATACATACATTATTTGACCTTTTGAATAAGAGTCAAGAAGACCTTATGAAAATGGAATATTTTCGCATAG  
AAGATGTA AACAGATATTGGACAGTCTA-----GAAATAGAAAAAGCA---TTTACAACCCA-----  
---TTTACCGAAGAA-----  
-----ATGCTCGGGGAT---GGA---  
AATGAGGGAATGTCTACAATACCTGGGTTAATCAGATACAATTTGAAGGATTTTGTAGATTTCATTGATCAGGGCTTAAC  
AGAAGAAGTATAAAGTTTCCAAAAATTGAA-----  
GATACAGATCAAGAAATTGAATTTCAATTATTTGTGGAAACATATCAATTGGTAGAACCCTTTGATAAAAAGAAAGAGATGC  
TGTATATGAATCACTC---ACATATTCTTCTGAATTATATGTATCCGCGGGATTAATTTGGAAAACC-----  
AGTAGGGATATGCAAGAACAACCTCTTTTTATTGGAACATTCCTTTAATGAATTCCTGGGAACTTCTATAGTAAATGG  
AATATACAGAATTGTGATCAATCAAATATTGCAAAGTCCCGGTATCTATTACCGGTGAGAATTGGACCAT---AACGGA-  
--ATTTG---  
GTCTATACCGGCACCATAATATCAGATTGGGGAGGAAGATTAGAATTAGAGATTGATCGAAAAGCAAGGATATGGGCTCG  
TGTGAGTAGGAAACAGAAAATATCTATTCTAGTTCTATCATCAGCTATGGGTTGGAATCTAAGAGAAATTCTAGAGAATG  
TTTGCTATCCTGAGATTTTCTTGTCTTTTCTGAATGATAAAGAG-----  
AAAAAAAATTTGGGTCAAAGAAAATGCCATTTTGGAGTTTATCAACAATTT-----GCTTGTGTAGGCGGAGAT--  
-CCGGTATTT---  
TCTGAATCCTTATGTAAGGAATTACAAAAAAATTTCTTTCAACAAAGATGTGAATTAGGAAGGATTGGTCGACGAAATAT  
GAATCGGAGACTCAATCTTGATATACCTCAGAACAATACATTTTTGTTACC GCGAGATATATTGGCAGCTGCGGATCATT  
TGATTGGAATGAAATTCGGAATGGGTACACTTGACGAT-----  
ATGAATCATTGAAAAATAAGCGTATTCGTTCTGTAGCGGATCTCTTACAAGATCAATTCGGATTGGCTCTGGTTCGTTT

AGAAAATGTGGTTAAAGGAACCTATATGTGGAGCAATTAGGCATAAATTGATACCGACTCCT-----  
CAGAATTTGGTAACTTCAACTCCA-----  
TTAACAACCACTTATGAATCTTTTTTCGGATTACACCCATTATCTCAAGTTTTGGATCGAACGAATCCATTGACACAAAT  
TGTTTCATGGGAGAAAATTGAGTTATTTGGGCCCTGGAGGATTAACAGGGCGAACTGCTAGTTTTCGAATACGAGATATCC  
ACCCTAGTCACTATGGACGCATTTGCCCAATCGACACGTCTGAAGGAATCAATGTTGGACTTATTGGATCTTTAGCAATT  
CATGCGAGAATTGGTCAG---GGGGGTCTCTAGAAAGCCCATTTTATGAA-----ATCTCC---  
GAGAGATCAAAATCAAAA---AAAGTACGGATGCTTTATTTATCACCAGTAGA-----GATGAATACTAT-----  
ATGATAGCGGCGGAAATTCTTTAGCGCTGAATCAGCGT---ATTCAAGAAGAACAGGTTGTTCCA---  
GCTCGATACCGTCAAGAATTCCTAACTATTGCATGGGAACAGGTTAATCTTCGAAGTATTTTTCTTTCCAATATTTTTTC  
TATTGGAGCTTCTCTCATTCTTTTATCGAGCATAATGATGCGAATCGAGCTTTAATGAGTTCGAATATGCAACGCCAAG  
CAGTTCCTACTTTCTCGGTCCGAGAAGTGCATTGTTGGAAGTGGGTTGGAACGCCAAGCGGCTCTAGATTCCAGGGGTTACC  
GCTATAGCCGAACACGAGGGAAAGATCATTATACCAATACTGACAAGATCATTTTATTGGGCAATGGA---GAT-----  
-----ACT-----  
TTAAGCATTCCATTAGTTATGTATCAACGTTCCAACAAAAATACTTGTATGCATCAAAAACCCAGGTTCCGCGGGGT--  
----  
AAATGCATTAAAAAGGACAAATTTTAGCGGATGGTGCCGCTACAGTTGGTGGCGAACTCGCTTTGGGTAAAAATGTATT  
AGTAGCTTATCTGCCATGGGAAGGTTACAATTTGAAGATGCAGTACTCATTAGCGAGCGTCTGGTATATGAAGATATTT  
ATACTTCTTTTACATACGGAAATATGAAATTCAGACTCATGTGACAAGCCAAGGA---CCC---  
GAAAGGATCACTAACGAAATACCGCATCTAGAAGCCCATTTACTCCGCAATTTAGACAAAAATGGAATTGTGATGTTGGG  
ATCTTGGGTAGAGGCGGGCGATGTTTTAGTAGGTAATTAATCCTCCAGACGGCGAAAGAA---  
TCATCGTATGCCCCAGAAGATAGATTATTACGAGCCATACTTGGCATTCCAGGTATCCACTTCAAAGGAACTTGTCTAAA  
ACTACCTATAGGTGGTAGGGGTAGAGTTATTGATGTGAGATGGATCCAGAAA---  
AAAGGGGGTTTGAATTATAATCCAGAACTATT---  
TGTGTCTATATTTTACAGAAACGTGAAATCAAAGTGGGTGATAAAGTAGCTGGAAGGCATGGAAATAAAGGTATCATTTT  
CAAAATTTTACCTAGACAAGATATGCCTTATTTGCAAGATGGAAGACCTGTTGATATGGTCTTCAATCCATTAGGAGTAC  
CCTCACGAATGAATGTAGGACAGATATTTGAATGCTCACTCGGGTTAGCGGGGGATCTGCTAGATAGACATTATCGAATA  
GCACCTTTGATGAGAGATATGAGCAAGAGGCTTCGAGAAAAGTAGTGTCTTCTGAATTATATGAAGCCAGTCAGCAAAC  
AGCGAAT---  
CCATGGGTATTTGAACCCGAGTATCCGGGAAAAAGCAGAATATTTGATGGAAGAACGGGAGATCCTTTTTGAACAACCTGT  
TATAATAGGAAAGCCTTATATCTTGAATTAATTCATCAAGTTGATGATAAAATACACGGACGTTCCAGTGGACATTATG  
CACTTGTTACACAACAACCCCTTAGAGGAAGGGCCAAGCAAGGGGGACAACGGGTAGGAGAAATGGAGGTTTGGGCTCTC  
GAGGGGTTTGGTGTGCTCATATTTTACAAGAGATGCTTACTTATAAATCGGATCATATTCGAGCTCGTCAAGAAGTACT  
TGGTACTACAATCATTGGGGGAACAATACCTAAACCTAAA-----  
GATGCTCCAGAATCTTTTCGATTGCTCGTTCGAGAACTACGATCTTTGTCTCTGGAAGTGAATCATTTTCTTGTATCT--  
----GAGAAGAAGTTC-----CAGATTAAT-----AGGAAGGAAGCT-----  
ATGAATCATAATTTTTCTTCTATGATCGATCGGTAT-----  
AAACATCAACAACCTCCGAATTGGATCAGTTTTCTCTCAACAAATAAGTGCTTGGGCCAAAAAATCCTCCCTAATGGAGA  
GATAGTTGGAGAGGTGACAAAACCTATACTTTTTCATTAC-----  
AAAACCAATAAACCAGGAAAAGGATGGATTGTTTTGTGAAAGAATTTTTGGTCTATAAAAAGTGAATTTGTGCTTGTGG  
AAATTAT-----CGAGTAATCGGAGATGAAAAAGAG---  
GACCCGAAATTTTGTGAACAATGCGGAGTAGAATTTGTTGATTCTCGGATACGAAGATATCAAATGGGATACATCAAATT  
AGCATGTCCAGTAACCCATGTGTGGTATTTGAAACGTCTTCTAGTTATATCGCGAATATTTTAGATAAACCTCTTAAAG  
AATTAGAAGGGCTAGTATACTGCGAT-----  
TTTTCTTTTGTAGGCCCATAGCTAAAAAACCTACT---TTCTTACGATTACGAGGG---TTATTGGAATAT-----  
-GAAATCCAATCATGGAAATACAGCATCCCACTTTTTTTTACTACT-----  
CAAGGCTTCGATACATTTGAAATCGAGAAATTTCTACTGGAGCGGGTGCTATCCGAGAACAATTAGCCGATCTCGATTT  
GCCAATTATTATAGATTATTCATTGGTGAATGGAAGGAATTAGGAGAA-----  
GAAAGA-----CCCAG-----GGT-----AATGAA-----TGGGAAGATCGCAAAATTGGA-----  
----  
AGAAGAAAGGATTTTTTGGTTAGACGCATGGAATTGGCTAAGCATTCTTTCGAACAAATATAGAACCAGAATGGATGGT  
TTTATGTCTACT  
Ginkgo  
CTTTTTTCCGAAATATGGACGAATGGAAGTTAGCTCCTGGAGAAGCACTTTACGAAGCTTCCCGAAATTTGATTGACTT  
ATTCATTCTTTTATGCGTGCAGAGGAA-----CAGAACATCGAT-----GGAATAGACAATTGG---  
AATGGGTATAATATGTCTCTTCCCTTTTCCCATATA-----TCGACT-----GATACAGAG-----  
AAAATGGAGGAAGAAATTGCATTCAAACATATCTTTATCGACCAATCAGAATTACCTCCAGGGTCTATAACTGCCTCAA  
AAGGGTCAATATACATACATTATCGACCTCTTGAATTACAGTCGAGACGATCCAACGAGAATCGAAAACCTTTGGGAATC

AATCTGTGCGAACAAATATTGGAAGTTCTA-----CAGAAACGTTTTGCA---ATTGATCTACCCAAGAAGAAG-----  
---TTT-----  
-----ATGCTATTAGAT---GAA---  
AATAAGGGAACGTCTACAATTCCTGGATTTGGTCAAATACAATTCGAGGGATTCTGTGCGTTTTATTGATCAAGGCTTAAT  
TGAGGAACTTTCTAATTTCCGGAAATTGAG-----  
TATACAGATCAAGAAATTGAATCTCGACTCTCTGGGAAAAAATATAAATCAGCGGAACCTTTGATCGAAGAGAGAAATGC  
TGTGTATCAGTCCCTT---ACATATTCTTCTGAATTGTATGTACCAGCAAGATTGATTTCAGAAGAAT-----  
AGGAGAAAGATACAGAAACAACTGTATTTCTTGGAAATATTCCCTTGATGAATCCCGAGGAACTTTTGTAGTGAATGG  
AATTTCCAGAATCGTGGTTCGATCAAATATTACGAAGTCCCGGTATTTATTACAGTTCGGAACCAGGCCAT---AATGGA-  
--ATCGCT---  
ATATATACTGGCACTATAATTTTTCAGATTGGGGAGGAAGACCAAAATTAGAGATCGATGGAAAAACAAGGATATGGGCTCG  
TGTGAGCAGAAAAACAGAAAGTATCTATTCCAGTTCTATTATCAGCCATGGGTTCAAATTTTTCGAAGAGATCCTAGACAATG  
TTTGCTACCCCGAAATATTCTTATCTTTTCTGAATGGGAGGCAGAAG-----  
CGAAAAAATATCTCCGGTTCGGAGGAAATGCCATTTTGGAGTTTCATAAGAACTG-----  
TATTGTGTAGGTGGCGAT---TTGGTATTT---  
TCCGAGTCTCTATGTAAGGAATTGCAGAAAAATCTCTTCAACAAAGATGTGAATTAGGAAGGATTGGTTCGACGAAATCC  
GAATCAAAAACCTGAATCTTGATATACCCGAGAATGAGATTTTTTTCATTACCACAAGATGTATTGGCTGCTGCGGATTATT  
CGATCAGAGTGAATTTTGAATGGGTACACTCGATGAT-----  
ATGGATCATCTAAAAAATAAACGTATTCGTTCTGTAGCAGATTTGTTACAAAATCAATTCGGATTAGCTCTGGGTCGCT  
GGTAAATTCAGTTCGAAGAACTATACGCAGAGCAACTAAGTGTAAATGTTTACCAACTCT-----  
AAGAATTTGGTAACTTCAACTCCA-----  
TTAACAACCCTTTTTCAAGATTTTTTGGTTTACACCCCTTATCTCAATTTTTGGATCAAACCTAATCCATTGACAGAAGC  
AGTTCATAGGCGAAAATTAAGTTATTTGGGTCCTGGGGGATTGACAAGGCGAACTGCTAGTTTTCCGATACGGGATATTC  
ATCCCAGTCATTATGGGCGTATTTGTCCGATTGAGACGTCCGAAGGAATAAATGCTGGACTTGTGTCATCATTAGCTATT  
CATGCAAAGATTGGTCAT---TGCGGTTCTTTACGAAGTCCATTCCATAAA-----ATATCT---GAGGGATCGAAA--  
-----GAAGAACATATGGTTTATCCATCACCAGGAGAA-----GATGAATACTAT-----  
CGAATAGCTACAGGGAATTCCTCTGGCATTGAATCAAGGG---ATTGAGGAGGAACAAGTTACTCCA---  
GCTCGATCTCGACAGGAATTTTAGCTATTGCACGGGAACAATTCATTTCCGAAGTATTTTTCTTTTCAATATTTCTC  
CGTTGGAGTTTTCCCTTATTTCTTTCTCGAACATAATGATGCGAATCGTGTCTTAAATGGGTTCTAATATGCAGCGTCAAG  
CAATTCACCTTTTTCAACCTGAGAAGTGCATTACCAGGAACTGGGTTAGAAGGTCAAGTAGCTCTAGATTTCAGGAAGTGT  
ACTATAGCCATAACAAGAGGGAAGGATCGAGTATACCGATGCCGAAAAATATAACTTTCTCGTTTAAATGGA---GAC-----  
-----ACT-----  
ATAGGAACAGAATTAGTTCTATATCAACGTTCTAATAAAAAATACTTGTATGCATCAAAAACCTCGAGTTCGCCAAGGG--  
----  
GAATGTGTGAAGAAGGGACAAATTCCTGGCAGACGGTGC GGCTACAGTAGAGGGAGA ACTCTCTCCGGGAAAAAACATCTT  
AGTAGCTTATATGCCATGGGAGGGATACAATTTTCGAAGACGCAATACTCATTAGCGAACGTCTAGTATACGAAGATATTT  
ATACCTCTTTTCATATCGAAAGACATGGAATTAGAACCTGTATGACAAGCCAGGGC---CCT---  
GAGAGAATCACTAAAGAAATACCTCATTTAGATGCTCATTACTCCGTCATTTAGACGAAAATGGCCTTGTAAATGCTAGG  
ATCTTGGATAGAAACAGGTGATGTTTTAGTGGGTAAATTAACGCCTCAAAAAGAAGAAGAA---  
TCATTGTGTGCCCCGGAAGGGAGATTATTACGAACCATATTTGGTATTTCAGGTATCCACTGCAAGAGAAAGTTGTCTCCG  
AGTACCTATCGGCGGAAGAGGTTCGAGTTATTGATGTGAGATGGATCCATGAA---  
GAAGAGAATTCGGGTGATAATGCAGAAACAGTC---  
CATGTATATATTTTACAAAACGTAATAACAAGTGGGCGATAAAGTAGCCGGAAGGCATGGTAATAAAGGTATTATTTT  
GAAGGTTTTGCCAGACAAGATATGCCTTATTCGCAAAATGGAACACCAGTTGATATGGTATTCAATCCATTAGGGGTAC  
CTTCACGAATGAATGTAGGACAGATCTTTGAATGTTTACCAGGTTTAGCAGGGAATCCGATGAACAAACATTATAGAATA  
ACACCTTTCCGGCAAAGATACGAGCGAGAAGCTTCGAGAAAACCTAGTGTCTCTGAGCTCTATAGGGCTAGTGAGCAAAC  
AGCCAAT---  
CCATGGGTATTTGAACCTGATCATCCTGGAAAAAATAGGTTAATTGATGGAAGAACAGGAGATCTTTTTCGAACAACCCGT  
TACAATAGGAAAAGCTTATATACCGAAATTAATTCATCAAGTTGATGATAAAATCCATGCACGTTCCAGTGGACCTTATG  
CACTTGTACACAACAACCTCTTAGAGGAAAATCCAAACGAGGGGGTCAACGAGTAGGAGAAATGGAAGTTTGGGCTCTA  
GAAGGTTCTGGTGTGCTTATATCTCGCAGGAGATGCTTACTCTGAAATCTGACCATATTATAGCTCGTCATGAAGTACT  
TGGTGCCATTATCACTGGAGAACCAATACCTAAACCGGGC-----  
ACTGTTCCAGAATCTTTTCGATTGCTCGTTTCGAGA ACTACGATCTTTAGCTCCAGAATTGAACCATGCTATTATATCT--  
----GAGAAAGACTTT-----CAGATAGAT-----AAGAAGGAAGTT-----  
--ATCGCCCGAGAT-----  
AAGCATCAACAACCTTCGAATTGGATTAGCTTCTCCTGAGAAGATTTGTGCTTGGTCCGAAAAAATTTTACCTAATGGAGA  
GATAGTTGGACAGGTGACTAAACCCATACTTACATTAT-----

AAAAC TAATGA ACCCAGAAAAAGATGGATTGTTCTGTGAAAGAATCTTTGGACCTATCAAAAAGTGGAGTTTGTGCTTGTGG  
AAATTCT-----CGAGTGATCAGAAATGAGAAGGAA---  
GACTCCAAATTTTGCGAACAATGTGGAGTTGAATTTGTTGATTCCCGAAGTCGAAGATATCGAATGGGATACATTAACT  
GGCATGTCCAGTGGTTTACGTATGGTATTCAAAACGTCTTCCCAGTTATATCGCGAATCTATTAGCGAAACCTCTTAAAG  
AATTAGAAGGCCCAGTATACTGCGATGTG-----  
TATCCCAATCTTTTTATTGCTAGGCCCATAGCTAACAAACCAACT---TCATTACGATCACGAGGT---  
ACATTCAAATAT-----GATATTC AATCCTGGGGAGATATTCTCCCTCATTATCTCTCTGCT-----  
-----

CAGGGCTTTGGGGCATTTC AAAATAGAGAAAATAGCTACTGGGGGAGATGCTATCAGGGAACAAC TAGCTGGTCCGGATTT  
GCGAATTCTTATGGCTAATTCGTATATGGAATGGAAAATATTAGAGGAA-----  
CAAAA-----TCGACT-----GGG-----AATGAA-----TGGGAAGATGAAAAAATTCAA-----  
-----

AGAAGGAAGGATTTTT CAGTTAGACGCATGGAATTAGCTAAACATTTTCATCCAAACAAATATAGAACCAGAATGGATGGT  
TTTATGCCTATT

Glycine

CTCTTTCTCGAAATATGGACAAATGGAAGTTTAACTCCTAAGGAAGCGCTTTTATGAAGCCTCCCGGAATTTGATTGATTT  
ATTTATTCCCTTTTTACACGCAGAAGAA-----GATAACTTTAAT-----TTAGAAAACAATCAA---  
CACAAAGTTACTTTGCCCTTTTTACTTTTTCATGATATA-----TTGGCTAAGGAAAAACTAAGG-----  
AAAAAGAAAAAAGAAATAGCATTGAAATCCATTTTTATTGACCAATTAGAATTGCCTCCAGGATCTATAATTGTCTCAA  
AAGATCCAATATTCATACATTATTAGAACTTTTGAATAACAGTCAAGAAGACCTTCTGAAAATTGAACATTTTCGCGTAG  
AAGATGTCAAATATATATTGGACTTTTTAGAAATAGAAAAGCATTTTGCA-----  
-----

-----ATGCTTGGGGAT---GGA---  
AATGAAGGAATGTCTACACTACCTGGATTGAATCAGATACAATTTGAAGGGTTTTGTAGGTTTATTGATCGGGGCTTACC  
AGAAGGGCTTTTTAAGTTTCCAAAATTGAG-----  
GATACAGATCAAGAAATTGAATTTCAATTATTTGTAGAAACATATCAATTATTAGAACCCTTGATAAACGAAAAAGATGC  
TGTATATGAATCGCTT---ACATATTCTGCTGAATTATATGTATCTGCGGGATTAATTTGGAAAAGT-----  
AGTAGGGACATACAAGAACAACTATTTTTGTTGGAAACATTCCTTTAATGAATTTCTCTGGGAACCTTCTATAGTAAATGG  
AATATACAGAATTGTAATCAATCAAATATTGCAAAGCCCTGGTATTTATTACC GTTCAGAATTGGACCCT---AGCGGA-  
---ATTTTCG---

GTCTATACTGGCACCATAATATCAGACTGGGGGGGTAGATTAGAATTAGAGATTGATAGAAAAGCAAGGATATGGGCTCG  
TGTGAGTAGGAAACAGAAAATATCTATTCTAGTTTTATCATCAGCTATGGGTTCGAATTTAAGCGAAATTCTAGAGAATG  
TTTGTATCCTGAAATTTTCGTTTCTTTCTTAAATGATAAGGAT-----  
AAAAAAAAAATAGGGTCAAAAAGAAAATGCCATTTTGGAGTTTTATCGACAATTT-----GCTTGTGTTGGTGGAGAT--  
-CCAGTATTT---  
TCTGAATCTTTATGTAAAGAATTACAAAAAAATTTTTTCAACAAAGATGTGAATTAGGAAGGATTGGTTCGACGAAATAT  
GAACCAAAAGCTTAATCTTGATATACCTCAGAACAATACATTTTTGTTACCACGAGATATATTGACAGCTGCGGATCATT  
TGATTGGAATGAAATTTGGAATGGGTATACTTGACGAT-----  
ATAAATCATTGAAAAATAAACGTATTCGTTCCGGTAGCAGATCTATTACAAGATCAATTTGGATTGGCCCTGGTTGTTTT  
AGAAAATATGGTTAGAGGAACTATATGTGGAGCAATTAGACATAAATTGATACCGACTCCT-----  
CAGAATTTGGTGACTTCAACTCCA-----

TTAACA ACTACTTATGAATCTTTTTTTGGATTACATCCATTATCTCAAGTTTTGGATCAA ACTAATCCATTGACCCAAAT  
AGTTCATGGGAGAAAATTGAGTTATTTGGGCCCTGGAGGATTGACGGGGCGA ACTGCTAGTTTTCCGATACGAGATATCC  
ACCCTAGTCACTATGGACGCATTTGTCCAATTGACACGTCGGAAGGAATCAATGTTGGACTTATTGGATCTCTAGCAATT  
CATGCGAGGATTGGTAGT---TGGGGTCCATAGAAAAGTCCATTTTATGAA-----ATATCT---GAGAGATCAAAA--  
-----AGAATACGCATGCTTTATTTATCACCAAGTAGA-----GATGAATACTAT-----  
ATGGTAGCAACAGGAAATTTCTTTGGCACTTAATCGAGAT---ATTCAGGAGGAACAGACTGTTCCA---  
GCCCGATACCGTCAAGAATTTCTTACGATTGCATGGGAACAGGTTTCATCTTCAAGTATTTTTCCCTTCCAATATTTTTCT  
TATTGGAGCTTCTCTGATTCCTTTTTATTGAACATAATGATGCCAATCGAGCTTTAATGAGTTCTAATATGCAACGTCAAG  
CAGTTCCGCTTTCTCAGTCCGAAAAATGCATTGTTGGA ACTGGATTGGAACGCCAAGTAGCTTTAGATT CAGGGGTTTCC  
GCTATAGCCGAACACGAGGGAAACATCATTATACCAATACTGACAGGATATTTTTATTTGGTAATGGA---GAT-----  
-----ACT-----

CTAAGCATTCCATTA ACTTATATCAACGTTCCAACAAAAATACTTGTATGCATCAAAAACCCAGGTTCCGCCGAGGT--  
-----

AAATGTATAAAAAAGGGACAAATTTTAGCGGATGGTGTCTGCTACAGTTGACGGCGAACTCGCTTTGGGAAAAAACGTCTT  
AGTAGCTTATATGCCATGGGAAGGTTACAATTCTGAAGATGCTGTACTCATT AATGAGCGTCTGGTCTATGAAGATATTT  
ATACTTCTTTTACATACGGAATATGAAATTCAGACTCATATGACAAGCTATGGT---TCT---

GAAAGAATCACTAATAAAAATTCCACATCTAGAAGCCCATTTACTCAGAAAATTTAGACAAAAATGGAATTGTGATCCTCGG  
GTCGTGGGTAGAAAACGGGTGATATTTTAGTGGGTAAATTAACACCTCAAATGGCAAAAGAA---  
TCCTCGTATTTCCCCGAAGATAGATTATTACGAGCTATACTTGGCATTCCAGGTATCCACCTCAAAGGAACTTGTCTAAA  
ACTACCTACAGGCGGTAGGGGTAGAGTTATTGATGTGAGATGGATCCAAAAA---  
AAGGGGGTTCCAGTTATAATCCAGAAACGATT---  
CGTATATATATTTTACAGAAACGTGAAATTAAGTAGGAGATAAAGTGGCTGGGAGACATGGAAATAAAGGTATCGTTTC  
AAAAATTTTGTCTAGACAGGATATGCCTTATTTGCAAGATGGAAGACCCGTTGATATGGTCTTCAATCCACTAGGGGTAC  
CTTCACGAATGAATGTAGGACAAATATTTGAATGCTCGCTCGGGTTAGCAGGAGGTATGCTAGAAAAGACATTATCGAATA  
ACACCTTTTGATGAGAGATATGAACAAGAAGCTTCGAGAAAACCTAGTGTCTTCTGAATTATATGAAGCCAGTAAACAAC  
ATCTAAT---  
CCATGGATATTTGAACCCGAGTATCCAGGAAAAAGCAAAATCTTTGATGGAAGAACAGGGAATTTCTTTTAAACAGCCTGC  
TATAATGGGAAAACCTTATATTTTGAATTAATTCATCAAGTTGATGATAAAAATACATGGACGTTCCAGTGGACATTATG  
CACTTGTACACAACAACCACTTAGAGGAAGGGCCAAGCAGGGAGGACAACGGGTAGGCGAAATGGAGGTTTGGGCCTTG  
GAAGGATTTGGTGTGCTCATATTTTACAAGAGATGCTTACTTATAAATCTGATCATATTTAAACTCGCCAAGAAGTACT  
CGGGACTACGATCATTGGAGGAACAATACCTAAACCTACA-----  
GATGCTCCAGAATCTTTTAGATTGCTAGTTCGAGAATTACGATCTTTAGCTATGGAACCTGAATCATTTTCTTGTATCC--  
----GAGAAGAACTTC-----CGGATTCAT-----AGGAAGGAAGCT-----  
ATGATTGATCAGTAT-----  
AAACATCAACAACCTCCGAATTGGATCAGTTTTCTCTCAACAAATAAGTGCTTGGGCAAAAAAATCCTACCTAATGGAGA  
GATAGTGGGGGAGGTAACAAAACCTATACTTTTTCATTAC-----  
AAAACCAATAAACCCGAAAAAGATGGATTATTTTGTGAAAGAATTTTGGGCCTATAAAAAGTGGGATTTGTGCTTGTGG  
AAATTAT-----CGAGTAATCAGAGATAAAAAGGAC---  
GACCCAAAATTTTGTGAACAATGCGGAGTAGAATTTATTGATTCTCGGATACGTAGATATCAAATGGGCTATATAAACT  
GGCATGCCTAGTAACTCATGTGTGGTATTTGAAACGTCTTCTAGTTATATCGCAAATCTTTTAGATAAATCTCTAAAGG  
AATTAGAAAGTCTAGTATACTGCGAT-----  
TTTTCGTTTTGCTAGACCCGTAGTTAAAAAACCCACT---TTCTTACGATTACGAGGT---TCATTGCAATAT-----  
-GAAATCCAATCTTGGAAACACAGCATAACCACTTTTTTTTACTACC-----  
CAAGGTTTTGATATATTTGAAATCGAGAAATTTCAAGTGGAGCGGGTCTATCCGAGAACAATTGGCCGATCTGGATTT  
GAGAATTTCTTATGGATTTCTCGTTGATAGAATGGAAAGAATTAGGGGAA-----  
GAGGGA-----TCCCG-----GACAATGAA-----AACGAA-----TGGGAAGATCGAAAAGTTGGA-----  
----  
AGAAGAAAGAATTTTTTGGTTCGACGCATAGAATTAGCTAAGCATTTTCTCCGAACAAATATAGAACCAGAATGGATGGT  
TTTATGTCTTTT  
Gossypium  
CTTTTTCTAGAAATATGGACAAATGGAAGTTAACTCCGAAAGAAGCACTTCATGAAGCTTCTCGCAATTTGATTGATTT  
ATTTATTCCTTTTCTACATACGGAAGAA-----GAAACTTACAT-----TTAGAAAACAATCAA---  
CACGATGTTACTTTACCTTTTTTTCCGTTTCATGATAGA-----TTAGTT-----AAACTAACA-----  
AAAAAGAAAAAAGAAATAGCATTGAAATATATTTTTATTGACCAATCAGAATTCCTCCAGGATCTATAATTGTCTCAA  
AAAGTCCAATATACATACATTATTGGACCTTTTGAATAACAGTCGAGAAGACCTTATGAAAATTGAACACTTTTCGCATAG  
AAGATGTAACAACAATATTGGGCATTCTA-----GAAAAGAAG-----  
-----  
-----ATGCTCGGGGAT---GAA---  
AATGGGAAATGTCTACAATACCTGGGTGGAATCAGATACAATTTGAAGGATTTTGTGGGTTTCATGGATCGGGGCTTAAC  
AGAAGAATTTATAAGTTTCCAAAAATTGAA-----  
GATACAGAGCAAGAAATGAAATTTCAATATTTGTGGAAACATATCAATGGTGGAAACCGTTGATAAAAAGAAAGGGATGC  
TGTATATGAATCACTC---ACATATTTCTTGAATTATATGTATCCGCAGGATTAATTTGGAAAACC-----  
AGTAAGGATATGCAAGAACAACAATTTTTATTGGAAACATTCCTTTAATGAACTCCCTCGGAACTTCTATAGTAAATGG  
AATATACAGAATTTGTGATCAATCAAATATTGCAAAGCCCCGGTATCTATTATCGATCAGAATTGGATCAT---AACGGA-  
--ATTTCG---  
GTCTATACTGGTACCATAATATCAGATTGGGGAGGGAGGTTAGAATTAGAGATTGATAGAAAAGCAAGGATATGGGCTCG  
TGTAAGTAGGAAACAGAAAATATCTATTCTAGTTCTATCATCAGCTATGGGTTCGAATCTAAGAGAAATTTAGAGAATG  
TTTGCTACCCTGAGATTTTCTTGTCTTTTCTGACCGATAAGGAA-----  
AAAAAAAATTTGGGTCAAAGAAAATGCCATTTTGGAGTTTTATCAACAATTT-----TCTTGTGTAGGCGGGGAT--  
-CCGGTATTT---  
TCTGAATCCTTGTGTAAGGAATTACAAAAGAAATCTTTTTCAGCAAAGATGTGAATTAGGAAGGATTGGTTCGACGAAATAT  
GAACCAGAGATTGAATCTTAATATACCTCAGAACAATACATTTTTTGTACCGCAGATATATTGGCAGCTGCGGATCGTT  
TGATTGGAATGAAATTTGGAATGGGTCCACTTGACGAT-----

ATGAATCATTGAAAAATAAGCGTATTCTGTTCTGTAGCGGATCTCTTACAAGATCAATTCGGATTGGCTCTGGTTCGTTT  
AGAAAATGTAGTTAGAGGAAGTATATGCGGAGCAATTAGGCATAAATTGATACCGACTCT-----  
CAGAATTTGGTAACTTCGACTCCA-----  
TTAACAACCACTTATGAATCCTTTTTCGGATTACACCCATTGTCTCAAGTTTTGGATCGAACAAATCCATTGACACAAAT  
AGTGCATGGGAGAAAATTGAGTTATTTGGGCCCGGAGGATTGACCGGGCGAACTGCTAATTTTCGGATACGAGATATCC  
ATCCTAGTCACTATGGACGCATTTGCCCAATTGACACGTCTGAAGGGATCAATGTTGGACTTATCGGATCCTTAGCAATT  
CATGCCAGGATTGGTCAT---TGGGGTCTCTAGAAAGTCCATTTTATAAA-----ATCTTT---GAGAGATCAAAA--  
-----AAAGCACAGATGCTTTATTTATCCCAAGTCGA-----GATGAATATTAT-----  
ATGGTAGCGGCAGGAAATCCTTTGGCCTTGAATCAGGGT---ATTAGGAAGAAGCAGGTTGTTCCG---  
GCTCGATACCGCAAGAATTCCTGACTATTGCATGGGAACAAGTTCATCTTCGAAGTATTTTCTTTTCAATATTTTTC  
TATTGGAGCTTCCCTCATTCTTTTATCGAGCATAATGACGCGAATCGGGCTTTAATGAGTTCTAATATGCAACGCCAAG  
CAGTTCGGCTTTCTCGTTCCGAGAAGTGCATTGTTGGAAGTGGGTTGGAACGCCAAGTGGCTCTAGATTGAGGATTCCC  
GCTATAGCCGATCACGAGGGAAGATCATTTCACCGATACTGACAAGATTATTTTATCGGGCAATGGA---GAT-----  
-----GCT-----  
CTAGGCATTCCATTAGTTATGTATCAACGTTCCAACAAAAATACTTGTATGCATCAAAGTCCCGGGTTCGGCGGGGT--  
-----  
AAATGCATTAAAAAGGGTCAAATTTTAGCGGACGGTGCCGCTACGGTTGGTGGCGAACTCGCTTTGGGCAAAAACGTACT  
AGTAGCTTATATGCCATGGGAAGGTTACAATTTGAGGATGCGGTACTCATTAGCGAGCGTCTAGTATATGAAGATATTT  
ATACTTCTTTTACATACGAAAATATGAAATTCAGACTCATGTGACAAGCCAAGT---CCT---  
GAAAGAATCACTAACGAAATACCGCACCTAGAAGCCCATTTACTCCGCAATTTAGACAAAAATGGAATTGTGATGCTGGG  
ATCTTGGGTGGAGACAGGCGATATTTTAGTAGGTAATTAACGCCTCAGGTGGCGAAAGAA---  
TCATCGTATGCTCCAGAAGATAGATTATTACGGGCCATACTTGGGATTGAGGATCCACTTCAAAGGAAACCTGTCTAAA  
ATTACCTATAGGTGGGAGGGTTCGAGTCATCGATGTGAGATGGGTCCAGAAA---  
AAAGGGGGTCTAGTTATAATCCGGAAACGATT---  
CGTGTCTATATTTACAGAAACGCGAAATCAAAGTAGCGGATAAAGTAGCCGGAAGGCATGGAAATAAAGGGATCATTTC  
AAAAATTTTACCTAGACAGGATATGCCTTATTTGCAAGACGGAAGACCTGTTGATATGGTCTTCAACCCATTAGGAGTAC  
CTTACGAATGAATGTAGGACAGCTATTTGAATGCTCGCTTGGGTTAGCAGGGAGTCTACTAGATAGACATTATCGAATA  
GCACCATTTGATGAGAGATATGAACAAGAGGCTTCGAGAAAAGTGTGTTTTCCGAATTATATCAAGCCAGTAAGCAAAC  
AGCGAAT---  
CCATGGGTATTTGAACCCGAATATCCAGGAAAAAGCCGAATATTTGATGGAAGAACGGGAGGCCCTTTGAGCAACCTGT  
TATAATAGGAAAACCTTATATCTTGAAATTAATTCATCAAGTTGATGATAAAAATACATGGGCGTTCAGTGGACATTATG  
CACTTGTTACACAACAACCACTTAGAGGAAGGTCCAAGCAAGGAGGACAACGGGTAGGAGAAATGGAGGTTTGGGCTCTA  
GAGGGATTTGGTGTGCTCATATTTTACAAGAAATGCTTACTTATAAATCTGATCATATTAGAGCTCGCCAAGAAGTACT  
TGGGACTACGATCATTGGAGGAACAATACCTAAACCCGAA-----  
GATGCTCCAGAATCTTTTCGATTGCTCGTCCGAGAATTACGATCTTTGGCTCTGGAAGTGAATCATTTCCTTGTATCT--  
----GAGAAGAAGTTC-----CAGATTAAT-----AGGAAGGAAGCT-----  
ATGATCGACCGATAT-----  
AAACATCAACAACCTCCGAATTGGATCAGTTTTCTCCCAACAAATAAGTGCTTGGGCCAAGAAAATCCTACCTAATGGAGA  
AACCGTTGGAGAGGTGACAAAACCTATACTTTTTCATTAC-----  
AAAACCAATAAACCGGAAAAGGATGGATTATTTGTGAAAGAATTTTGGACCTATAAAAAGTGAATTTGCGCTTGTGG  
AAATTAT-----CGAGTAATTGGAAATCAAAGGAG---  
GGCCCTAAATTTTGTGAACAATGCGGAGTTGAATTTGTTGATTCTCGGATACGAAGATATCAAATGGGATACATAAGGCT  
GGCATGTCCAGTAACTCATGTATGGTATTTGAAACGTCTTCTAGTTATATCGCCAATCTTTTAGACAAACCTCTTAAAG  
AATTAGAGGGTCTAGTATACTGCGAT-----  
TTTTCTTTTGTAGGCCCATCGCTAAAAAACCTACT---TTCTTACGATTACGAGGT---TCATTCGAATAT-----  
-GAAATTCATCCTGGAAATACAGTATCCCACCTTTTTTTTACTACC-----  
CAAGGTTTCGATACATTTTGAAGTCGCGAAAATTTTACCAGGAGGAGTGTCTATTTCGAGAACAATTAGCCGATCTAGATTT  
GCGAATTCCTTATCGATTATTCGGTGGTGAATGGAAGAATTAGGAGAA-----  
GAAGGC-----CTCACG-----GGT-----AATGAA-----TGGGAAGATCGAAAAATTGGA-----  
-----  
AGAAGAAAGGATTTTTTGGTTAGACGCATGGAATTGGCTAAGCATTTTTATTCGAACAAATATAGAACCAGAATGGATGGT  
TTTATGTCTATT  
Helianthus  
CTATTTCTCGAAATATGGACAAATGGAAGTTAACTCCTAAAGAAGCACTTCACGAAGCCTCCCGGAATTTGATTGATTT  
ATTGATTCCCTTTTACATAACCAAGAA-----GAAAATTTAAGT-----TTAGAGGACAATCAA---  
CACATAGTTCCTTTACCCCTTTTACCTTTTATGATAAA-----TTGGCT-----AAACTAACA-----  
AAAAATAAAAAAAAATGGCGTTGAAATCGATTTTTATTGACCAATCAGAATTGCCTCCGAAATCTATAATTGCCTCAA

AAGGTCCAACATATATACATTATTGGACCTTTTGAATAACAGTCAAGAAGATCTTATGAAAATGGAACATTTTCGCATAG  
AAGACGTCAAACAAATTTTAGGGATTCTA-----GAAAAAATTTTCGTA---  
ATTGATTTACCGAAAAATAAGTTTTAA-----  
-----  
ATGTCCACAATACCTGGATTTAATCAGATACAGTTTGAAGGATTTTGTAGGTTTCATTGATCAGGGTTTGGCAGAAGAGCT  
TTCTAAGTTTCCAAAAATTGAA-----  
GATACAAATCAAGAAATTGACTTTGAATTCTTTTTGGAAAGATATCAATTGGTAGAACCCCTGATAAAGGAAAGAGATGC  
TGTGTATGAATCACTC---  
ACATATTTCTTCTGAATTATATGTATCCGCGAGACTCATTGGAAAAACGATAGGCGTAGGTATATCCAAGAACAAACAAT  
TTTGATAGGAAAGATCCCTATAATGACTTCTCTGGGAGCTTTTATAGTAAATGGAATCTATAGAATTGTGATCAATCAAA  
TATTGCAAAGTCCCGGTATTTATTACCAGTCAAGATTAACCGAT---AATGGA---ATTTTCG---  
GTCTATACCGGCACCATAATATCAGATTGGGGAGGAAGATTAGAATTAGAAATTGATAGAAAAGCAAGGATATGGGTTCC  
TGTGAGTAGGCAACAAAACTATCTATTCTAGTTCTATTATCAGCAATGGGGTTGAATATAAGAGAAATTCTAGAGAATG  
TTTGCTATCCTGAACTATTTTTGTCTTTTCTGAATGAT-----  
AAAAAAAATAGGGTCAAAAGAAAATGCTATTTTGAATTTTATCAACAATTT-----GCTTGTGTAGAGGGAGAT--  
-CCGGTATTT---  
TCTGAATCCTTATCTAAGGATTTACAAAAAAATTTCTTTCAACAAAGATGTGAATTGGGAGGGATTGGTCGACGAAATAT  
GAATCGGAGACTAAACCTTGATATACCCCGAACAATACATTTTGTACCAGGAGATATATTGGCAGCCGCGGATCGTT  
TGATTCGAATAAAAATTTGGAATGGGTACACTTGACGAT-----  
ATGAATCATTGCAAATAAACGTATTCGTTCTGTAGCAGATCTTTTACAAGAGCAATTTGGATTGGCCTTGGTTCTGTT  
AGAAAATATGGCTCGAGGAAACATATATGCAGCACTTAAGCATAACTGGACACCAACTCCT-----  
CAGAACTTGGTAAATTCAACTCCA-----  
TTAACAGATACTTATAAAGTTTTTTTCCGTTTACACCCATTATCTCAAGTTTTGGATCGAACTAATCCACTGACACAAAT  
AGTTCATGGGAGAAAATTGAGTTATTTGGGCCCGGGGGGATTGACTGCGCGAAGTCTACTTTTCCAATACGAGATATTC  
ATCCTAGTCACTATGGGCGTATTTGCCCAATTGACACATCTGAAGGAATAAATGTTGGACTTATTGGATCCTTAGCAATT  
CATGCGAGGATTGGCCGT---TGGGGTCTCTAGAAAGTCCGTTTTATCAA-----ATTTCT---GAGAGATCAAAA--  
-----GGGGCACAGATGCTTTATTTATCACCAGGTAGA-----GATGAATACTAT-----  
ATGGTAGCAGCAGGAAATTTTGGCCTTGAATCAGGGT---ATTCAGGAAGAACAGGTTTGTTCCTCA---  
GCTCGGTATCGTCAAGAATTCCTGACTATTGCATGGGAACAGGTTTCAGCTTCGAAGTATTTTTGCCTTCCAATATTTTTCT  
TATTGGAGCTTCCCTCATTCTTTTATCGAGCATAATGATGCGAATCGGGCTTTAATGAGTTCTAATATGCAACGCCAAG  
CAGTCCCTCTTTCTCAGTCCGAGAAGTGCATTGTTGGAAGTGGATTGGAAGGCCAAGCGGCTCTAGATTCAGGGGCTCTT  
GCTATAGCCGAACACGAAGGAAAGATTTTTTATACCGATACTGACAAGATCCTTTTATCAGGTAATGGG---GAT-----  
-----ACT-----  
CTAAGGATTCCATTAGTTATGTATCAACGTTCCAACAAAAATACTTGTATGCATCAAAAACCCAGGTTTCGGCGGGGT--  
-----  
AAATGCATTAAAAAGGGACAAATTTTAGCGTATGGTGCTGCTACAGTTGGTGGCGAAGTCTGCTTTGGGGAAAAACGTATT  
AGTAGCTTATATGCCATGGGAAGGTTACAATTTTGAAGATGCAGTACTCATTAGCGAGCGCTTAGTATATGAAGATATTT  
ATACTTCTTTTACATACGTAATATGAAATTCAGATT-----AACCAAGGC---CCC---  
GAAAGGGTCACTAATGAAATACCGCATTTAGAAGTCCATTTACTCCGAAATTTAGACAAAAATGGAATTGTAATGCTGGG  
ATCTTGGGTGGAACAGGTGATATTTTAGTAGGTAATTAACGCCCAATGGTGAAAGAA---  
TCATCGTATGCCCCGGAAGATAGACTGTTACGAACCATACTGGCATGCGGGTATATACTTCAAAAGAACTTGTCTAAA  
ACTACCTATAGGCGGTAGGGGTTCGGGTATTGATGTGAGATGGGTCCAGAGTTCTAAGACAGATGAGACAGAGAAAACAG  
AAAGTATT---  
CGTGTATATATTTTACAGAAACGTGAAATAAAAAGTAGGTGATAAAGTAGCTGGAAGACATGGAATAAGGGTATCATTTC  
AAAAATTTTACCTAGACAAGATATGCCTTATTTGCAAGATGGAAGACCTGTTGATATGGTCTTCAATCCATTAGGAGTAC  
CTTCGCGAATGAATGTAGGACAAATATTTGAATCTTCGCTCGGGTTAGCGGGGATTTGCTAGACAGACATTATCGAATA  
GCGCCTTTTGTAGAGATATGAACAAGAAGCTTCGAGAAAACCTGGTGTCTTCTGAGTTATATGAAGCCAGTAAGCAAAC  
AGCGAAT---  
CCATGGATATTTGAACCCGAGTCTCCAGGAAAAAGCAGAATATTTGATGGAAGAACGGGGGATCCTTTTGAACAACCTGT  
TATAATAGGAAAGCCTTATATCTTGAATTAATTCATCAAGTTGATGATAAAATCCATGGGCGTTCAGCGGGCGTTATT  
CACGTCTTACACAACAACCCCTTAAAGGAAGGGCCAAAAAGGGGGGCGAGCGGGTAGGAGAAATGGAGGTTTGGGCTTTA  
GAAGGGTTTGGCGTTGCTTATATTTTACAAGAAATGCTTACTTATAAATCTGATCATATTAGAGCTCGCCAGGAAGTACT  
TGGTACTATAATCTTTGGAGGAAGAATACCGACTCCTGAG-----  
GATGCTCCAGAATCTTTTCGGTTGTTTCGTTTCGAGAACTACGATCTTTAGCTCTGGAAGTGAATCATTCTTGTATCT--  
----GAGAAGACTTTC-----CAGCTTAAT-----AGGAAGGAAGCTTAA---  
ATGAAGCAGAAGTTTTCTTCTATGATCGATCGATAT-----



ACACATCAACAACCTCCGAATTGGATTAGTTTTCTCTCAACAAATAAGTACTTGGTCCAAAAAATCCTGCCTAATGGCGA  
GATTGTTGGAGAGGTGACAAAACCTTATACCTTTTATTAC-----  
AAAACCAATAAACAGAAAAAGATGGATTATTTTGTGAAAGAATTTTTGGGCCTATCAAAGTGAATTTGTGCTTGTGG  
AAATTAT-----CGAGTAATCGGAGATGAAAAGGAA---  
GACCCGCAATTTTGTGAACAATGCGGAGTCGAGTTTGTGATTCTCGGATACGAAGATATCAAATGGGCTACATCAAAC  
CGCATACCCCGTAATGCATGTGTGGTATTTGAAACGTCTTCTAGTTATATTGTGAATCTTTTAGATAAACCTCTTAACG  
AATTAGAAGACCTAGTATACTGCGGT-----  
TTTTATTTTGTCTAGGCCCATAGATAAAAAACCCACT---TTTTTACGATTACGGGGT---TTATTGGAATAT-----  
-GAAATTC AACCCCTGGAAATACAGGATCCCAATTTTTTTTACTACC-----  
CGGAGCTTCGATACATTTGAAATCGAGAGATGTCTACCGGAGGAGGTTCTATCAGACAACAATTAGCCAATCTAGATTT  
ACGAATGATTATAGATTATTCATTGGTAGAATGGAAAGAATTGGAGGAA-----  
GAGGAA-----TCCACA-----GGG-----AATGAA-----TGGGAAGATCGAAAAGTTGGA-----  
-----

AGAAGAAAAGATTTTTTGTCTTAGACGCATGGAATTGGCTAAGCATTTTTATTTCGAACAAATATAGAACC AAAATGGATGGT  
TTTGCCTCTATT

Illicium

CTTTTTCTCGAAATATGGACAAATGGAAGTTTCACTCCTAAAGAAGCACTTTACGAAGCTTCCCGTAATTTGATCGATTT  
ATTTCTTCTTTTCTACATGCAGAAGAA-----CAGGACATCAAT-----GTAGAGGACAATCAA---  
AACAGGGCGACTGCGCCCTTTTTACCTTTTCATGATGGA-----TTGACT-----AATATAGGG-----  
AAAAGGAAAAAAGGAATTGCATTGAAACGTGTTTTTATTGACCAATCAGAATTGCCTACCAGGACCTATAATTGTCTTAA  
AAGGTCCAATATACATACATTATTGGACCTTTTGTAGTAACAGTCAAGAAGATCTTATGAGAATTGAGCATTTCGCATAG  
AAGATGTA AACAGATATTGGGCATTCTA-----CAGAAGCGTTTCGCA---ATTGAT-----  
-----  
-----

ATGTCTACAATACCTGGATCTAGTCAGATACAATTTGAGGGATTTTGTAAAGTTCATTGATCAGGGCTTGGCGGAAGAACT  
TCATAAGTTTCCAAAAATGGAA-----

GATACAGATCAAGAAATGGAATTTCAATTATTTGTGGAAACATATCAATTGGTAGAACCCTTTGATAAAAAGAAAGGGATGC  
TGTGTATGAATCACTC---ACATATTCTTCTGAATTATATGTATCGGCGGGATTAATTTGGAGAGCC-----  
GGTAGGGATATGCGAAAACAACCGTATTTATTGGAAACATTCCTCTAATGAATTCCTGGGAACCTCTCTAGTAAATGG  
AATATACAGAATTGTGGTCAATCAAATATTGCAAAGCCCTGGTATTTATTACCGTTT CAGAATTGGACCAT---AACGGA-  
--ATTCT---

GTATATACCGGTACCATAATATCAGATTGGGGAGGAAGATCAGAATTAGAGATTGATAGAAAAGCAAGGATATGGGCCCG  
TGTGAGTAGGAAACAAAAATATCTATTCTAGTTCATCATCAGCTATGGGTTCGAATCTAAGAGACATTCTAGACAATG  
TTTGCTACCCTGAAATTTTCTTGTCTTTCCCGAATGATAAAGAG-----  
AAAAAAAAGATTGGGTCAAAGGAAAATGCCGTTTTGGAGTTTTATCAACAATTT-----GCTTGTGTAGGTGGGGAT--  
-CCGGTATTT---

TCTGAGTCCTTATGTAAGGAATTACAAAAGAAATTTTTTCAACAAAGATGTGAGTTAGGAAGGATTGGTCGACGAAATAT  
GAACCAGAGACTAAATCTTGATATACCTCAGAACAGTACATTTTTGTTACCACGAGATGTATTGGCTGCTGCGGATCATT  
TGATCGGAATGAAATTTGGAATGGGGACACTTGACGAT-----  
CTGAATCACTTGAAAAATAACGTATTCGTTCTGTAGCCGATCTGTTACAGGATCAATTCGGATTGGCTCTGGTTCTGTT  
GGAAAATGTGGTTCGAGGAACATATGTGGAGCAATCAGGCATAAATTGATACCGACTCCT-----  
CATAATTTGGTAACCTTCAACTCCA-----

TTAACAACCACTTATGAATCGTTTTTTCGGCCTACACCCTTATCTCAAGTTTTGGATCGAACTAATCCATTGACACAAAT  
AGTTCATGGGCGAAAAATGGAGTTATTTGGGTCTGGAGGATTAACAGGACGAACTGCTAGTTTTTCGGATACGAGATATCC  
ATCCTAGTCACTATGGGCGTATTTGCCAATTGACACGTCCGAAGGAATTAATGTTGGACTTATTGGATCCTTAGCTATT  
CATGCAAGGATTGGTGAT---TGGGGTCTATAGAAAAGTCCGTTTTATGAA-----ATATCT---GAGAGATTA AAA--  
-----GAGGAACAGATGGTTTTATTTATCTCCAAGGAGA-----GATGAATACTAT-----

ATGGTAGCGGCAGGAAATCTTTGGCATTGAATCGGGGT---ATTGAGGAAGAACAAGTTGTTCCA---  
GCTCGATACCGTCAAGAATTCCTGACTATTGCATGGGAACAGATTCTCTCGAAGCATTATCCCTTCCAATATTTTTCT  
TATTGGAGCTTCCCTCATACCTTTTATCGAGCATAATGATGCGAATCGGGCTTTAATGAGTTCTAATATGCAGCGTCAAG  
CAGTTCGCTTTTCTCATTCCGAGAAGTGCATTGTTGGAACGTTGGGTTGGAACGCCAAGCGGCTCTAGATTCGGGGGGTTCA  
GCTATAGCCGAACACGAGGGAAAGATTACTTATACCGATACTGAAAAGATCGTTTTTATCGGGGAATGGA---GAC-----  
-----ACT-----

ATAAGCATTCCATTGGTTATGTATCAACGTTCCAACAAAAATACTTGTATGCATCAAAAACCCAGGTTTCATAGGGGT--  
-----

AAATGCGTGAAAAAGGGACAAATTTTAGCGGACGGTGC GGCTATAATTGGTGGCGAACTCGCTTTGGGAAAAACATATT  
AGTAGCTTATATGCCATGGGAAGGTTACAATTCTGAAGACGCGGTACTCATTAGTGAACGTCTGGTATATGGAGATATTT

ATACTTCTTTTTACATCCGGAATATGAAATTCAGACTCATGTACACAAGCCAAGGA---CCT---  
GAAAGAATCACTAACGAAATACCGCATTTAGAGGCTCATTACTCCGCAATTTAGACAAAAATGGAATTGTTATGCTGGG  
ATCTTGGGTAGAAACAGGTGATATTTTAGTAGGTAAATTAACGCCTCAGACAGCGAAAGAA---  
TCATCGTATGCTCCGGAAGATAGATTATTACGAGCCATACTTGGCATTCCAGGTATCCACCGCAAAGGAACTTGTCTAAA  
ACTACCTATAGGCGGAAGGGGGCGAGTTATTGATGTGAGATGGATCCAGAAA---  
AAACGGGGTTCCAGTTCTAATCCAGAAACAATT---  
CGTGTATATATTTTACAGAAACGTGAAATCAAAGTGGGTGATAAAGTAGCTGGAAGACATGGAAATAAAGGTATCATTTC  
CAAAATTTTGCCTAGACAAGATATGCCTTATTTACAAGATGGAACACCGGTTGATATGGTCTTCAACCCATTAGGAATAC  
CTTACGAATGAATGTGGGGCAGATGTTTGAATGCTCGATTGGTTTAGCGGGGAACCTGTTGAACAGACATTATAGAATC  
ATACCTTTGATGAGAGATATGAGCAAGAGGCTTCGAGAAAACCTAGTGTTCCTGAATTATATAAAGCCAGTAAGCAAAC  
AGCAAAT---  
CCATGGGTATTTGAACCCGAGTATCCTGGAAAAAGCAGAATATTTGATGGAAGAACAGGAGATCCTTTTGAACAACCTGT  
TATAATAGGAAAGTCCATATATGATGAAATTAATTCATCAAGTTGATGATAAAATCCATGGGCGTTCCAGCGGGCATTATG  
CACTTGTACACAACAACCCCTTAGAGGAAGGGCCAAGCATGGGGGACAACGAGTAGGAGAAATGGAAGTTTGGGCTCTA  
GAGGGATTTGGTGTGCTCATATTTACAAGAGATGCTTACTTATAAATCCGATCATATTAGAGCTCGTCAGGAAGTACT  
TGGTACTACGATAATTGGAGGAACAATACCTAACCTGAT-----  
GGTGTCCAGAATCTTTTCGATTGCTCGTTCGAGAACTACGATCTTTGGCTCTGGAACCTGAATCATTTCCTTGTATCT--  
----GAGAAAAGCTTC-----CAGATTAAT-----AGGAAGGAAGCT-----  
ATGAATCAGAATTTCTCTTCTATGATCGACCGGTAT-----  
AAGTATCAACAACCTTCGAATTGGATCAGTTTCTCCTCAACAAATAAGCGCTTGGGCCAACAAAATCCTACCTAATGGAGA  
GATAGTTGGAGAGGTGACAAAACCTATACTTTTCATTAC-----  
AAAACCAATAAACCCGAAAAAGATGGATTGTTTTGTGAAAGAATCTCTGGACCTATAAAAAGCGGAATTTGTGCTTGTGG  
AAATTAT-----CGAGTGATCGGAGATGAAAAAGAA---  
GGCCCCGAAATTTTGTGAACAATGCGGAGTCGAATCTGTTGATTCTCGGATCCGAAGATATCAAATGGGATATATCAAAC  
GGCATGCCCGGTGACTCATGTGTGGTATTTGAAACGTCTTCCGAGTTATATCGCGAATCTTTTAGATAAACCTCTTAAG  
AATTAGAAGGCCTAGTATACTGCGAT-----  
TTTTCTTTTGTAGGCCCATAGCTAAAAAACCGACT---TTCTTACGATTACGAGGT---TCATTCGAATAT-----  
-GAAATCCAATCCCGAAATACAGCATCCCACCTTTTTTTTACTACC-----  
CAGGGCTTCGATACATTTGAAACCGAGAAATATCGACTGGAGCGAGTGCTATCAGAGAACAATTAGCCGACCCGGATTT  
GCGAATTATTATGGATCGTTTATTGGTGAATGGAAGGAATTGGGGGAA-----  
GAAGGA-----TCCACT-----GGG-----AATGCA-----TGGGAAGATAGAAAAATAGGA-----  
-----  
AGAAGAAAGGATTTCTTGGTTAAACGCATGGAATTGGCTAAGCATTCTTTCGAACAAATGTAGAACCAGAACGGATGGT  
TTTGTGCCTATT  
Jasminum  
CTATTTCTCGAAATATGGACAAATGGGAGTTTAACTCCGAAAGAAGCACTTCATGAAGCCTGCCGAAATTTGATTGATTT  
ATTTATCCCTTTTACATAAGGAAGAG-----GAAACCTCACCT-----TTAGAGGACAATCAC---  
CACACGGTTCCTTTATCCCCTCTTACCTTTTACGATAAAA-----GCGGAT-----AAACTCAGA-----  
AAAAGAAAAAAGAAATAAAAAAAAATAG-----  
-----  
-----ATGCTGGGGGAT---GGA---  
AATGAGGGAATGTCTACAATACCTGGATTGAATCAGATCCAATTTGAAGGATTTTGTAGGTTTATTGATCAGGGTTTGC  
AGAAGAATTTCTAAGTTTCCAAAAATTGAA-----  
GATACAGATCAAGAAATTTGAATTTTCAAGTATTTATGGAAGATATCAATTTGGTAGAACCATTTAGAAAAGAAAGAGATGC  
TGTCTATGAATCACTC---ACATATTCTTCGGAATTTCTATGTATCCGCGGGATTAATTTGGAAAAT-----  
AGTAGGGATATGCAAGAACAACCATTTTATTGGAAACATTCCTCTAATGAATTCCTGGGAACTTCTATAGTAAAGGG  
AATATATAGAATTGTGATCAATCAAATATTGCAAAGCCCCGGCATTATTACCAGATCTGAATTGGACCAT---AACGAA-  
--ATTTCG---  
GTCTATACCGGCACCATAATATCAGATTGGGGAGGAAGATCAGAATTAGAGATTGATAGAAAAGCAAGGATATGGGCTCG  
TGTGAGTAGGAAACAAAAAATATCTATTCTAGTTCTATCATCAGCTATGGGTTGGAATCTAAAAGAAATTTCTAGACAATG  
TTTTTTATCCTGAAATTTTTTTGTCTTTTCTGAAAGATAAGGAG-----  
AGAAAAAAATTTGGATCAAAAGAAAATGCCATTTTGGAAATTTTATCAACAATTT-----GCTTGTGTAGGTGGGGAT--  
-CCAGTATTT---  
TCTGAATCCTTATGTAAGGAATTACAAACGAAGTTCTTTCAACAAAGATGTGAATTAGGAAGGATTGGTCGACGAAATAT  
GAACCGAAGACTGAACCTTGTATATACCCAGAACAAATACATTTTGTACCACGAGACATATTGGCAGCCGCTGATCATT

TGATTGAACAGAAATTTGGAATGGGTACACTTGACGAT-----  
ATGAATCATTGAAAAATAAACGTATTCGTTCTGTAGCGGATCTTTTACAAGATCAACTCGGATTGGCTCTGGTTCTGTT  
AGAAGATGAGGTTTCGAGAACTATATGTGGACCAATTCGGCATAAATGGAGAACGACTCCTCATCCTCAGAATTTAGTAA  
CTTCAACTCCA-----  
TTAACAACCACTTATGAATCTTTTTTCGGTTCACACCCCCTATCTCAAGTTTTGGATCAAACCTAATCCATTGACCCAAAT  
AGTTCATGGGAGAAAGTGGAGTTATTTGGACCCTGGGAGGACTAACAGGGCGAACTGCTAGTTTTTCGGATACGAGATATCC  
ATCCTAGTCACTATGGGCGTATTTGCCCAATTGACACATCTGAGGGAATCAATGTTGGACTTATTGGATCCTTAGCAATT  
CATGCGAAGATTGGTCAT---TGGGGATCTCTAGAAAGTCCATTTTATGAA-----ATTTCT---GAAAGATCAACA--  
-----GGGGTACAGATGCTTTATTTATCACCAGGTAGA-----GATGAATACTAT-----  
ACGGTAGCGGGCGGAAATCTTTGGCGTTGAATCAGGAT---ATTCAGGAAGAAGAGGTTGTTCCA---  
GCTCGATACCGTCAAGAATTCCTGACTATTGCATGGGAACAGGTTCATTTTCGAAGTATTTGCCCCTTCCAATATTTTTCT  
TATTGGAGCTTCCCTCATTCTTTTTATCGAACATAATGATGCGAATAGGGCTTTAATGAGTTTCAATATGCAACGTCAAG  
CAGTTCCGCTTTCTCGACCCGAGAAATGCATTGTTGGAACGGGTTGGAACGACAAGTAGCTCTAGATTGAGGGGCTCTT  
GCTATAGCCGAACGTGAGGGAAAGATCGTTTTCTACTGATACTGAAAAGATCCTTTTTCTCAGGTAATGGG---GAT-----  
-----ACT-----  
CTAAGCATTCCATTAGTTATGTATCAATCTTCCAACAAAAATACTTGTATGCATCAAAAACCCAGGTTTCAGCGGGGT--  
----  
AAATGTATTAATAAGGGACAAATTTTAGCAGATGGTGCTGCTACGGTTGGTGGCGAACTTGCTTTGGGGAAAAACGTATT  
AGTAGCTTATATGCCATGGGAAGGTTACAATTCTGAAGATGCAGTACTCATTAGTGAGCGTTTTGGTATATGAAGATATTT  
ATACTTCTTTTACATACGGAAATATGAGATTGAGACTGCT-----GGG---ACT---  
GAAAGGATCACTAATGAAATACCGCATTTAGAAGCCCATTTACTCCGAAATTTAGACAAAAATGGAATTGTGATGCTGGG  
ATCTTGGGTGGAGACGGGTGCTATTTTAGTAGGTAAATTAACGCCCGAAGTGGTGAAGAA---TCC-----  
CCCACAAATAGATTGGTATACGACATAGTAGGCATTGAGGTATCTACTTCAAAAGACACTTGTTTTAAACTACCTATAGG  
TGGTAGGGGCCGGGTTATTGATGTGAGGTGGATCCAGAAA---AGGGGGAT---AATGATAATCCAGAAACGATT---  
CGTATATATATTTACAGAAACGTGAAATCAAAGTAGGCGACAAAGTGGCTGGAAGACACGGAAATAAAGGTATCATTTC  
CAAAATTTTGCCTAGACAAGATATGCCTTATCTGCAAGATGGAAGACCTGTTGATATGGTTTTCAACCCATTAGGAGTAC  
CCTCAGCAATGAATGTAGGACAGATATTTGAATGTTTCGCTCGGGTTAGCAGGGGTCTGCTAGACAGACATTATCGAATA  
GTGCCTTTTGTGAGAGATATGAACAAGAAGCTTCGAGAAAACCTAGTGTCTTCTGAATTATATGAAGCCAGTAAGCAAAC  
AACGAAT---  
CCATGGGTATTTGAACCCGAGTATCCAGGAAAAAGCAGAATATTTGATGGAAGGTGCGGGAATCCTTTTTGAGCAACCCAT  
TCTAATAGGAAAGCCTTATATCTTGAATTAATTCATCAAGTTGATGATAAAATCCATGGACGTTCCGTTGGAAATTATA  
CGCATATTACACAACAACCCCTTAGAGGAAGGGCAAAAGGGGGGGGCAACGAGTAGGAGAAATGGAAGTTTGGGCTCTA  
GAAGGATTTGGTGTGCTCATATTTTACAGGAAATGCTTACTTATAAATCTGATCATATTCGAGCGCGCCAAAAAATACC  
TGGTACTACGATGATTGGGGGAACAATACCGAATCCTGAG-----  
GATGCTCCAGAATCTTTTCGAGTGTCTGTTTCGAGAATTACGATCTTTAGCTCTGGAACCTGAACCATTTTCTTGTATCT--  
---GAGAAAAACTTC-----CAGATTAAT-----CGGAAGGAAGCTTAA---  
ATGAATCAGAATTTTGTCTTCTATGATCGATCGGTAT-----  
AAACATCAACAGCTACGAATTGGATTAGTTTTCTCCTGAACAAATAAGTGCTTGGGCCACTAAAATCCTGCCTAATGGAGA  
GATCGTTGGAGAGGTGACAAAACCTCTATTTTGCATTAC-----  
AAAACCAATAAAGCGGAAAAAGGTGGATTATTTTGTGAAAGAATTTTTGGTCTCAAAAAAGTGAATTTGCGCTTGTGG  
AAATTAT-----CGAGTAATCGGAGATGAAAAAGAA---  
GACCCGAAATTTTGTGAACAATGTGGAGTCAATTTGTGCGATTCTCGCATACGAAGATATCAAATGGGCTACATCAAAC  
CGCATGCCAGTAACCCATGTGTGGTATTTAAAACGTCTTCTAGTTATATTGCGAATCTTTTAGATAAACCTCTTAAAG  
AATTAGAAGGCCTAGTATACCGCGAT-----  
TTTTCTTTTGTAGGCCATAACTAAAAACCTACT---TTCTTACGATTAAGAGGT---TTATTGCAATAT-----  
-GAAATTAATCTTGGAAATACAGTATCCCGCTCTTTTTTACTATC-----  
CAAGGCTTCGATACATTTTCGCAATCGAGAAATCTCTACTGGTGCAGGTGCTATCCGAGAACAATTAGTCGACTTAGATTT  
ACGAATTTTGTAGATAATTCGTTGGTGAATGGAAGAATTAGGGGAA-----  
GAAGGA-----CCACA-----GGA-----AATGAA-----TGGGAGGATCAAAGGTTAGA-----  
-----  
AGAAGAAGGGGTTTTTTAGTTAGACGCATGGAATTGGCTAAGCATTTTTATTGAAACAAATATAGAACCAGAATGGATGGT  
TTTGTGTTTATT

Lactuca

CTATTTCTCGAAATATGGACAAATGGAAGTTAACTCCTAAAGAAGCACTTTATGAAGCCTCCCGGAATTTGATTGATTT  
ATTGATTCCCTTTTTACATACCAAAGAA-----GAAATTTAAAT-----TTAGAGGGCAATCAA---  
CACATGGTTCCCTTTACCCCTTTTACCTTTTATGATAAA-----TTGGCT-----AAACTAACA-----  
AAAAATAAAAAAATGGCGTTGAAATCGATTTTTATTGACCAATCAGAATTGCCTCCAGGATCTATAATTGCCTCAA

AAGGTCCAATATATATACATTGTTGGACCTTTTGAATAACAGTCAAGAAGATCTTATGAAAATGGAACATTTTCGCATAG  
AAGATGTCAAACAAATTTTAGGCATTCTA-----GAAAAAATTTTCGTA---  
ATTGATTTACCGAAAAATAAGTTTTAA-----  
-----  
ATGTCCACAATACCTGGATTTAATCAGATACAATTTGAAGGATTTTGTAGGTTTCATTGATCAGGGTTTGACAGAAGAACT  
TTCTAAGTTTCCAAAAATTGAA-----  
GATACAAATCAAGAAATTGACTTTGAATTATTTTTGGAAAGATATCAATTGGTAGAACCCCTCGATAAAGGAAAGAGATGC  
TGTGTATGAATCACTC---  
ACATATTTCTTCTGAATTATGTATCTGCGAGACTAATTTGGAAAAACGATAGGCGTAGGTATATCCAAGAACAAACAAT  
TTTGATAGGAAAGATCCCTCTAATGACTTCTCTGGGAGCTTTTATAGTAAATGGAATATATAGAATTGTGATCAATCAAA  
TATTGCAAAGTCCCGGTATTTATTACCAGTCAGAATTGAACGAT---AATGGA---ATTTCC---  
GTCTATACCGGCACCATAATATCAGATTGGGGAGGAAGATTAGAATTAGAGATTGATAGAAAAACAAGGATATGGGTTCC  
CGTGAGTAGGCAACAAAACTATCTATTCTAGTTCTATTATCAGCTATGGGGTTGAATATAAGAGAAATTCTAGAGAATG  
TTTGCTATCCTGAACTATTTTTGTCTTTTCTGAATGAT-----  
AAAAAACAAATAGGGTCAAAAGAAAATGCTATTTTTGGAGTTTTATCAACAATTT-----GCTTGTGTAGAGGGGAGAT--  
-CCGGTATTT---  
TCTGAATCCTTATCTAAGGATTTACAAAAAAATTTCTTTCAACAAAGATGTGAATTGGGAGGGATTGGTCGACGAAATAT  
GAATCGGAGACTGAACCTTGATATACCCCAGAACAATACATTTTTGTTACCGCGAGATATATTGGCAGCCGCGGATCGTT  
TGATTCGAATCAAATTTGGAATGGGTACACTTGACGAT-----  
ATGAATCATTTGCAAATAAACGTATTCGTTCTGTAGCAGATCTTTTACAAGAGCAATTTGGATTGGCCTTGGTTCTGTTT  
AGAAAATATGGCTCGAGGAAACATATATGCAGCACTTAAGCATAACTGGACACCAACTCCT-----  
CAGAACTTGGTAAATTCAACCCCA-----  
TTAACAGATACTTATAAAGTTTTTTTCCGTTTACACCCATTATCTCAAGTTTTGGATCGAACTAATCCATTGACACAAAT  
AGTTCATGGGAGAAAATTGAGTTATTTGGGCCCGGGGGGATTGACTGCGCGAACTGCTACTTTTCCAATACGAGATATTC  
ATCCTAGTCACTATGGGCGTATTTGCCCAATTGACACATCTGAAGGAATAAATGTTGGACTTATTGGATCCTTAGCAATT  
CATGCCAGGATTGGTCGT---TGGGGTCTCTAGAAAGTCCGTTTTATAAA-----ATTTCT---GAGAGATCAAAA--  
-----GGGGCGCGGATGCTTTATTTATCACCGGGCAGA-----GATGAATACTAT-----  
ATGGTAGCGGCAGGAAATTTTGGCCTTGAATCAGGGT---ATTCAGGAAGAACAGGTTTGTTC---  
GCTCGATATCGTCAAGAATTCCTGACTATTGCATGGGAACAGGTTTCATCTTCAAGTATTTTTTCTTCCAATATTTTTCT  
TATTGGAGCTTCCCTCATTCTTTTATCGAGCATAATGATGCGAATCGGGCTTTAATGAGTTCTAACATGCAACGCCAAG  
CAGTCCCTCTTTCTCAGTCCGAGAAGTGCATTGTTGGAAGTGGATTGGAAGGCCAAGCGGCTCTAGATTCAGGGGCTCTT  
GCTATAGCCGAACACGAGGGGAGAGATTATTTATACCGATACTGACAAGATCCTTTTATCAGGTAATGGG---GAT-----  
-----ACT-----  
CTAAGGATTCCATTAGTTATGTATCAACGTTCCAACAAAAATACTTGTATGCATCAAAAACCCAGGTTTCAGCGGGGT--  
-----  
AAATGCATTAAAAAGGGACAAATTTTAGCGTATGGTGCTGCTACAGTTGGTGGCGAACTCGCTTTGGGGAAAAACGTATT  
AGTAGCTTATATGCCATGGGAAGGTTACAATTTTGAAGATGCAGTACTCATTAGTGAGCGCTTAGTATATGAAGATATTT  
ATACTTCTTTTACATACGTAATATGAAATTCAGATT-----AACCAAGGC---TCC---  
GAAAGGGTCACTAATGAAATACCACATTTAGAAGTCCATTTACTCCGAAATTTAGACAAAAATGGAATTGTAATGCTGGG  
ATCTTGGGTGGAACAGGTGATATTTTAGTAGGTAATTAACGCCCCAAATGGTGAAAGAA---  
TCATCGTATGCCCCGAAGATAGATTGTTACGAACCATACTTGGCATGCGGGTATATACTTCAAAAAGAACTTGTCTAAA  
ATTACCTATAGGAGGTAGGGGTGCGGTGATTGATGTGAGATGGGTCCAGAGTTCTAAGACAGATGAGACAGAGAAAACAG  
AAAGTATT---  
CGTGTATATATTTTACAGAAACGTGAAATAAAAAGTAGGCGATAAAGTAGCTGGAAGACATGGAATAAGGGTATCATTTT  
AAAAATTTTGCCTAGACAAGATATGCCTTATTTGCAAGATGGAAGACCTGTTGATATGGTCTTCAACCCATTAGGAGTAC  
CTTCCCAGATGAATGTAGGACAAATATTTGAATCTTCACTCGGGTTAGCTGGGGTTTGGCTAGACAGACATTATCGAATA  
GCGCCTTTTGTAGAGATATGAACAAGAAGCTTCGAGAAAACTGGTGTTTTCTGAATTATATGAAGCCAGTAAGCAAAC  
AGTGAAT---  
CCATGGATATTTGAACCCGAGTCTCCAGGAAAAAGCAGAATATTTGATGGAAGAACAGGGGATCCTTTTGAACAACCTGT  
TATAATAGGAAAGCCTTATATCTTGAATTAATTCATCAAGTTGATGATAAAATCCATGGGCGTTCAGTGGGCGTTATT  
CACGTCTTACACAACAACCCCTTAAAGGAAGGGCCAAGAAAGGGGGACAACGGGTAGGAGAAATGGAGGTTTGGGCTTTA  
GAGGGGTTTGGCGTTGCTTATATTTTACAAGAGATGCTTACTTATAAATCTGATCATATTAGAGCGCGCCAGGAAGTACT  
TGGTACTATAATCTTTGGAGGAAGAATACCGACTCCTGAA-----  
GATGCTCCAGAATCTTTTTCGGTTGTTTCGTTTCGAGAACTACGATCTTTAGCTCTGGAAGTGAATCATTTTCTTGTATCT--  
----GAGAAGACTTTT-----CAGCTTAAT-----AGGAAGGAAGCTTAA-----  
ATGATCGATCGATAT-----

ACACATCAACAACCTCCGAATTGGATTAGTTTTCTCTCAACAAATAAGTACTTGGTCCAAAAAATCCTGCCTAATGGCGA  
GATAGTTGGAGAGGTGACAAAACCTTATACCTTTTATTAC-----  
AAAACCAATAAACCCAGAAAAAGATGGATTATTTTTGTGAAAGAATTTTTGGGCCTATCAAAGTGAATTTGTGCTTGTGG  
AAATTAT-----CGAGTAATCGGAGATGAAAAGGAA---  
GACCCGCAATTTTGTGAACAATGCGGAGTCGAGTTTGTGATTCTCGGATACGAAGATATCAAATGGGCTACATCAAACCT  
CGCATACCCGGTAATGCATGTGTGGTATTTGAAACGTCTTCTAGTTATATTGTGACTCTTTTAGATAAACCTCTTAACG  
AATTAGAAGACCTAGTATACTGCAAT-----  
TTTTATTTTGTAGGCCCATAGATAAAAAACCTACT---TTTTTACGATTACGGGGT---TTATTAGAATAT-----  
-GAAATTC AACCCCTGGAAATACAGGATCCCCATTTTTTTTACTACC-----  
CGGAGCTTCGATACATTTGAAATCGAGAGATGTCTACCGGGGGAGGTTCTATCAGACAACAATTAGCCAATCTAGATTT  
ACGAATTATTATAGACTATTCATTGGTAGAATGGAAAGAATTGGAGGAA-----  
GAGGAA-----CCCACA-----GGG-----AACGAA-----TGGGAAGATCGAAAAGTTGGA-----  
-----

AGAAGAAAAGATTTTTTGTCTTAGACGCATGGAATTGGCTAAGCATTTTTATTTCGAACAAATATAGAACCAAAATGGATGGT  
TTTGCCTTATT

Liriodendron

CTTTTTCTCGAAATATGGACGAATGGAAGTTTAACTCCTAAAGAAGCACTTCACGAAGCTTCCCGTAATTTGATTGATTT  
ATTTATTTCTTTTCTACATGCGGAGGAA-----CAGGACATCGTT-----TTAGAGGACAATCCA---  
AACCGCTTTACTGTACCCCTTTTTACCTTTTCATGATAGA-----TTGGCG-----AATATAAGG-----  
AAAAACAAAAAAGGAATTGCATTGAAATGTATTTTTATTGACCAATCAGAATTGCCTCCAGGACCTATAATTGTCTCAA  
AAGGTCCAATATACATACATTATTGGACCTTTTGTAGTAACAGTCAAGAAGATCTTATGAGAATTGAACATTTTTCGCATAG  
AAGATGTAAAACAAATATTGGACATTCTA-----CAGAAGCATTTCACA---ATTGATTTACCTAAGAAT---  
AAGTTT-----

-----ATGCTCCGGGAT---GGA---

AATGAGGGAATGTCTACAATACCCGGATTTAGTCAGATACAATTTGAGGGATTTTGTAGGTTTATTGATCAGGGCTTGAC  
GGAAGAACTTCATAAGTTTCCAAAAATTGAA-----  
GATACAGATCAAGAAATTGAATTTCAATTATTTGTGGAACATATCAATTTGGTAGAACCTTGATAAAAAGAAAGAGATGC  
TGTGTATGAATCACTC---ACATATTCTTCTGAATTATATGTACCCGCGGGTTAATTTGGAAAACC-----  
GGTAGAGATATGCAAGAACAACCCGTATTTATTGGAAACATTCCTCTAATGAATTCCTGGGAACCTTCTATAGTAAATGG  
AATATACAGAATTGTGATCAATCAAATATTGCAAAGTCCCGGTATTTATTACCGTTTCAAGATTGGACCAT---AACGGA-  
--ATTCT---

GTCTATACTGGCACCATAATATCAGATTGGGGAGGAAGATCAGAATTAGAGATTGATAGAAAAGCAAGGATATGGGCCCG  
TGTGAGTAGGAAACAAAAATATCTATTCTAGTTCTATCATCAGCTATGGGTTTCAAGTCTAAGAGAAATTCTAGATAATG  
TTTGCTACCCTGAAATTTTCTTGTCTTTCCCGAATGATAAGGAA-----  
AAAAAAAAGATTGGGTCAAGGGAAAATGCCATTTTGGAGTTTATCAACAATTT-----GCTTGTGTAGGCGGGGAT--  
-CCGGTATTT---

TCTGAATCCTTATGTAAGGAATTACAAAAGAAATTTTTCAACAAAGATGTGAATTAGGAAGAATTGGTCGACGAAATAT  
GAACCGGAGACTGAATCTTGATATACCTCAGAACAATACATTTTTGTTACCACGAGATGTATTGGCTGCTGCGGATCATT  
TGATCGGAATGAAATTTGGAATGGGCACACTTGACGAT-----  
ATGAATCACTTGAAAAATAACGTATTCGTTCTGTAGCAGATCTGTTACAGGATCAATTCGGATTGGCTCTGGTTCTGTT  
AGAAAATGCGGTTTCGAGGAACATATGTGGAGCAATCCGGCATAAATTGATACCGACTCCT-----  
CAGAATTTGGTAACCTTCAACTCCA-----

TTAACAACCACTTATGAATCGTTTTTTCGGCCTACACCCTTTATCTCAAGTTTTGGATCGAACTAATCCATTGACACAAAT  
AGTTCATGGGCGAAAATCGAGTTATTTGGGTCTGGAGGATTAACAGGGCGAATGCTAGTTTTTCGGATACGAGATATTC  
ATCCTAGTCACTATGGACGTATTTGCCAATTGACACGTCCGAAGGAATCAATGTTGGACTTATTGGATCCTTAGCTATT  
CATGCGAGGATTGGTCAT---TGGGGTTCGATAGAGAGTCCGTTTTATGAA-----ATATCT---GAGAGATCCAAA--  
-----GAAGTACAGATGGTTTTATTTATACCAAGTAGA-----GATGAATACTAT-----

ATGGTAGCGGCAGGAAATCTTTAGCGTTGAATTGGGGT---ATTGAGGAAGAAGAGGTTGTTCCA---  
GCTCGATACCGTCAAGAATTCCTGACTATTGCATGGGAACAGATTCTTTCGAAGCATTTCCTTCCAATATTTTTTC  
TATTGGAGCTTCCCTCATTCTTTTATCGAGCATAATGATGCGAATCGGGCTTTAATGAGTTCTAATATGCAGCGCCAAG  
CAGTTCGCTTTTCTCGGTCCGAGAAGTGTATTGTTGGAAGTGGGTTGGAATGCCAAGCGGCTCTAGATTCGGGGGTTTCA  
GCTATAGCCGAACACGAGGGAAAGATCGTTTTATACCGATACTGATAAGATCGTTTTTATCAGGTAATGGA---GAC-----  
-----ACT-----

ATAAGCATTCCATTGGTTATGTATCAACGTTCCAACAAAAATACTTGTATGCATCAAAAACCTCAGGTTCCGGCGGGGT--  
-----

AAATGCATTA AAAAAGGGACAAATTTTAGCGGACGGTGC GGCTACAGTTGGTGGTGAACCTTGCTTTGGGAAAAACGTATT  
AGTAGCTTATATGCCATGGGAAGGCTACAATTCTGAAGACGCGGTACTCATTAGCGAACGTCTAGTATATGGAGATATTT

ATACTTCTTTTACATCCGGAAATATGAAATTCAGACTCATGTGACAAGCCAAGGC---CCT---  
GAAAGAATCACTAACGAAATACCGCATTTAGAAGCTCATTACTCCGCAATTTAGACAAAAATGGAATTGTGATGCTGGG  
ATCTTGGATAGAAACAGGTGATATTTTAGTAGGTAAATTAACGCCTCAGACAGCGAAAGAA---  
TCATCGTATGCTCCGGAAGATAGATTATTACGGGCCATACTTGGCATTCCAGGTATCCACTGCAAAGGAACTTGTCTAAA  
ACTACCTATAGGGGGAAGGGGTGCGATTATTGATGTCAGATGGATCCAGAAA---  
AAGGGGGTTCCAGTTATAATCCAGAAATGATT---  
CGTGTATATATTTTACAGAAACGTGAAATCAAAGTAGGTGATAAAGTAGCTGGAAGACATGGGAATAAAGGTATCATTTC  
AAAAATTTTGCCTAGACAAGATATGCCCTATTTGCAAGATGGAACACCAGTTGATATGGTCTTCAACCCATTAGGAGTAC  
CTTCGCGAATGAATGTGGGACAGATATTTGAATGCTCGCTCGGGTTAGCGGGGGACCTGCTGGACAGACATTATAGAATA  
GCACCCCTTGTAGAGAGATATGAGCAAGAGGCTTCGAGAAAACCTAGTGTCTTCTGAATTATATTCAGCCAGTAAGCAAAC  
AGCAAAT---  
CCATGGGTATTTGAACCCGAGTGTCCGGGAAAAAGCAGAATATTTGATGGAAGAACAGGAGATCCTTTTGAACAACCTGT  
TATAATAGGAAAGTCTATATCCTGAAATTAATTCATCAAGTTGATGATAAAATCCATGGACGTTCCAGTGGACATTATG  
CACTTGTTACACAACAACCCCTTAGAGGAAGGGCCAAGCAAGGGGGACAACGAGTAGGAGAAATGGAAGTTTGGGCTCTA  
GAGGGATTCCGGTGTGCTCATATTTACAAGAGATGCTTACTTATAAATCTGATCATATTAGAGCTCGTCAGGAAGTACT  
TGGTACTACGATCATTGGAGGAACAATACCTAATCCTGAG-----  
GATGCTCCAGAATCTTTTTCGATTGCTCGTTTCGAGAACTACGATCTTTGGCTCTGGAACCTGAATCATTTCCTTGTATCT--  
----GAGAAGAACTTC-----CAGATTAAT-----AGGAAAGAAGCT-----  
ATGATCGATCGGTAT-----  
AAACATCAACAACCTTCGAATTGGATCAGTTTTCTCTCAACAAATAAGTGCTTGGGCCAACAAAATCCTACCTAATGGAGA  
GATAGTTGGAGAAGTGACAAAACCTATACTTTTCATTAC-----  
AAAACCAATAAACCGGAAAAAGATGGATTGTTTTGTGAAAGAATCTTTGGACCTATAAAAAGTGAATTTGTGCTTGTGG  
AAATTAT-----CGAGTGATCGGAAATGAAAAAGAA---  
GACCCGAAATTTTGTGAACAATGCGGAGTCAATTTGTGCGATTCTCGAATACGAAGATATCAAATGGGATACATCAAAC  
GGCATGTCCGGTGACTCATGTGTGGTATTTGAAACGTCTTCCTAGTTATATCGCGAGTCTTTTAGATAAACCCCTTAAG  
AATTAGAAGGCCTAGTATACTGCGATGTG-----  
TATCCCAATTTTCTTTTGTAGGCCCATAGCTAAAAAACCTACT---TTCTTACGATTACGAGGT---  
TCATTCCGAATCT-----GAAATCCAATCCCGGAAATACAGCATCCCACTTTTTTTTACTACC-----  
-----  
CAGGACTTCGATACATTTTCGAAATAGAGAAATCTCTACTGGAGCAGGTGCTATCAAAGAACAATTAGCCGATCCGGATTT  
GCGAATTATTACAGATCATTCAATTGGTAGAATGGAAGGAATTAGGGGAA-----  
GAAGGG-----TCCGCTGAT---GGG-----AATGAA-----TGGGAAGATAGAAAAATTGGA-----  
-----  
AGAAGAAAGGATTTTTTGGTTAGACGCATGGAATTAGCTAAGCATTTTATTTCGAACAAATGTAGAACCAGAACGGATGGT  
TTTGTGCCTATT  
Lotus  
CTCTTTCTCGAAATATGGACAAATGGAAGTCTAACTCCTAAGGAAGCGCTTTATGAAGCCTCCCGAAATTTGATTGATTT  
ATTTATTCTTTTTTACATGCAGAAGAA-----GAAAAGTTAAAT-----TTTGAAAACAATGAA---  
CATAAAGTTACTTTACCCCTTTTTACTTGTGATGATCTA-----TTGGCTAAAACGAAACTAAAG-----  
AAAAAAAAAAAAAGAAATAGCATTCAAATCCATTTTCATTGACCAATTAGAATTGCCTCCCAAGATCTATAATTGTCTCAA  
AAAGTCCAATATACATACCTTATTGGAACTTTTGACTAAGAGTAAGGAAGACCTTATGAAAATTGAACATTTTCGCGTAG  
AAGATGTAAAACACATATTAGACATTTTAGAAATTGAAAAGCATTTTCCA-----  
-----  
-----ATGCTTGGGGTT---GGA---  
AATGAGGGAATGTCTACACTACCGGGGTGAATCAAATCCAATTTGAAGGGTTTTGTAGGTTTATTGATAGAGGCTTGAC  
AGAAGAATTTTTAAGTTTTCTAAAATTGAA-----  
GATACAGATCAAGAAATTTGAATTTCAATTTATTTGTGGAACTTATCAATTAGTAGAACCTTCTATAAAAAGAAAAAGATGC  
CGTATATGAATCACTT---ACATATTCTTCGGAATTATATGTATCCGCGGGATTAATTTGGAAAAAC-----  
AGTAAGAATATCCAAGAACAACAATTTTTATTGGAAACATTCTCTAATGAATTCCTGGGAACTTCTATAGTAAATGG  
AATATATAGAATTGTAATCAATCAAATATTGCAAAGCCCCGGTATCTATTACCAGTCAGAATTGGACCAT---AAGGGA-  
--ATTTCG---  
GTCTATACCGGCACAATAATATCAGATTGGGGGGGAAGATTAGAATTGGAGATTGATAGAAAAGCAAGGATATGGGCTCG  
CGTGAGTAGAAAACAGAAAATATCTATTCTAGTTCTATCATCAGCTATGGGTTGCAATTTAAACGAAATTTCTCGAAAATG  
TTTGCTACCCTGAAATTTTCTTGTCTTTTCTGAATGATAAGGAA-----  
GAAAAGAAAATCGGGTCAAAGAAAGTGCCATTTTGGAGTTTTATCGACAATTT-----GCTTGTGTGGGCGGAGAT--  
-CCAGTATTT---  
CCTGAATCCTTATGTAGGGAATTACAAAAAAATTTTTTCAACAAAGATGTGAATTAGGCGAGATTGGTTCGACGAAATAT

GAATCGAAGACTGAATCTTGATATACCTCAGAACAATACATTTTTGTTACCTCGGGATATATTGACAGCTGCGGATCATT  
TGATTGGAATGAAATTTTGAATGGGTACGCTTGATGAT-----  
ATGAATCATTGAAAAATAAACGTATTCGTTCCGGTAGCAGATCTCTTACAAGATCAATTTGGATTGGCCCTGGTTCTGTT  
AGAAAATATGGTTAGAGGAACCATATGTGGAGCAATTAGATATAAATTGATACCGACTCT-----  
CAGAATTTGGTGACTTCAACGCCA-----  
TTAACAACCACTTATGAATCTTTTTTTCGGCTTACATCCATTATCTCAAGTTTTGGATCGAACCAATCCATTGACCCAAAT  
AGTTCATGGGAGAAAATTGAGTTATTTGGGTCTGGAGGATTGACGGGGCGAACTGCTAGTTTTTGAATACGAGATATCC  
ATTCTAGTCACTATGGACGCATTTGTCCAATTGACACCTCTGAGGGAATCAATGTTGGACTTATTGGATCCCTCGCAATT  
CATGCGAGGATTGGTTCGT---TGGGGTCCATAGAAAAGTCCATTTTTTGA-----ATTTCT---GAGAGATCAAAA--  
-----AGAATACACATGCTTTATTTATCACCCAGTAGA-----GATGAATACTAT-----  
ATGATAGCGACAGGAATTTATTTGGCATTGAATCAGGGC---AATCAGGAGGAACAGATTGTTCCA---  
GCTCGATATCGTCAAGAATTTCTGACTATTGCAATGGGAACAGGTTTCATCTTCAAGTATTTTCTCCTTCCAATATTTTTCT  
TATTGGTGCCTCCCTTATTCCTTTTTATTGAGCATAATGATGCGAATCGAGCTTTAATGAGTTCAAACATGCAACGTCAAG  
CAGTTCCACTTTCTCAGTCTGAAAAGTGCATTGTTGGAAGTGGATTGGAACGACAAGTGGCCTTAGATTTCGGGAACTCTC  
GCTATAGCCGAACACGAGGGAAAGATCATTATAAAGATACAAACAAGATTGTTTTATTGGAAGTGA---GAG-----  
-----ACT-----  
CTAAGCGTTCATTAGTTATATATCGACGTTCCAACAAAAATACTTGCATGCATCAAAAATCCCAGGTTCCAGAGAGGT--  
----  
AAATGCATTAAAAGGGGACAAATTTTAGCAGATGGTGCTGCTACAGTTGGCGGTGAACCTCTCTCTGGGAAAAAACGTATT  
AGTAGCTTATATGCCATGGGAAGGATACAATTTCTGAGGATGCTGTACTCATTAGTGATCGTCTGGTATATGAAGATATTT  
ATACTTCGTTTTCATATACGGAAATATGAAATTCAGACTCATGTGACAAGCAATGGT---CCT---  
GAAAGAATCACTAATAAGATTCCACACTTAGAAGTCCATTTACTACGAAATTTAGACAAAAATGGACTTGTGATCCTGGG  
ATCTTGGGTAGAAGCTGGCGATATTTTAGTGGGTAAATTAACGCCTCAAATGGCGAAAGAA---  
TCCTCGTATGCCCCGGAAGATAGATTATTACGAGCTATACTTGGGATTTCAGGTATCTACCTCAAAGGAACTTGTCTAAA  
ATTACCTATAGGTGGTAGGGGCCGCTTATTGATGTGAGATGGCTCCACAAA---  
AAGGGGGTTCCGGTTATAATCCAGAACTATT---  
CATATATATATATTACAGAAACGTGAAATCAAAGTAGGTGATAAAGTGGCCGGAAGACATGGAAATAAAGGCATTGTTTC  
CAAGATTTTGGCTAGACAGGATATGCCTTATTTGCAAGATGGAAGACCTGTTGATATGGTCTTCAACCCATTAGGGGTAC  
CTTCACGAATGAATGTAGGACAGATATTTGAATGCTCACTCGGATTAGCGGGGGATGTGCTAGATAGACATTATCGAATA  
GCACCCCTTGTAGAGATATGAACAAGAGGCTTCTAGAAAACCTGTGTTTTCTGAATTATATCAAGCCAGTAAACAAAC  
ATCGAAT---  
CCATGGATATTTGAACCCGAGTATCCCAGAAAAGCAGAATATTTGATGGAAGAACAGGGACTCCTTTTGAACAGCCTGT  
TATAATTGGAAATCCTTATATCTTGAATTAATCCACCAAGTTGATGATAAAATACATGGACGTTCCAGTGGACATTATG  
CACTTGTTACTCAACAACCTCTTAAAGGAAGGGCCAAGCAAGGAGGACAGCGGGTAGGTGAAATGGAAGTTTGGGCTCTT  
GAGGGATTCCGTGTTGCCATATTTTACAAGAGATGCTTACTTATAAATCTGATCATATTTAAAGCTCGTCAAGAAGTACT  
AGGGACTACGATTATTGGAGGAACAATATCTAAACCCGTA-----  
GATGCTCCAGAATCTTTTCGATTGCTCGTTAGAGAACTACGATCTTTGGCTCTGGAAGTGAATCATTTCCTTGTCTCT--  
----GAGAAGAACTTC-----CGGATTCAT-----AGGAAGGAAGTT-----  
ATGATTGATCAGTAT-----  
AAACATCAACAACCTCCGAATTGGATCAGTTTTCTCCTCAACAAATAAGTGCTTGGGCAACAAAGATCCTACCTAATGGAGA  
GATAGTTGGAGAGGTAACAAAACCTATACTTTTCATTAC-----  
AAAACCAATAAGCCCCGAAAAGATGGATTATTTTGTGAAAGAATTTTTGGACCTATCAAAAGTGGGATTTGTACTTGTGG  
AAATTAT-----CGAGTAATTGGAGATAAAAAAGAC---  
GAACCCAAATTTTGTGAACAATGCGGGGTAGAATTTGTGGATTCTCGGATACGTAGATATCAAATGGGCTATATAAACT  
AGCATGCCCCGTAACCCATGTGTGGTATTTGAAGCGTCTTCCTAGTTATATCGCGAATCTTTTAGATAAACCTCTTAAAG  
AATTAGAAGTCTAGTATATTGCGAT-----  
TTTTCGTTTTGCTAGACCCGTAGTTAAAAAACCTACT---TTCTTACGATTACGAGGT---TTATTGAAATAT-----  
-GAAATCCAATCCTGAAATACAGCATTCCACTCTTTTTCGCTACC-----  
CACGGTTTTCGATACATTTGAAATCGGAAATATCTAGCGGCGCGGGTCTATCCGAGAACAATTAGTCGATCTGGATTT  
GAGAATTGTTATTGATTCTTCATTGGTAGAGTGGAAAGAATTAGGGGAA-----  
GAGAGA-----TCCACG-----CACAAATGAA-----AATGAA-----TGGGAAGACCGAAAGGTTGGA-----  
----  
AGAAGAAAGAATTTTTTGGTTCGGCGCATGGAATTAGCTAAACATTTTATCCGAACAAATATAGAACCGGAATGGATGGT  
TTTATGTCTCTT  
Morus  
CTTTTTCTCGAAATATGGACAAATGGAAGTTAACTCCTAAAGAAGCACTTCATGAGGCCTCCCGAAATTTGATTGATTT  
ATTTATCCCTTTTTCCATGCAGAAGAA-----CAT-----TTAGAAAACAATCAA---

CACAAAGGTACTTTACCCCTTTTTAATTTTCATGGTAGA-----TTAGCT-----AAACCAAGG-----  
AAAACGAAAAAAGAAATAGCATTGAAATATATTTATATTGACCAATCAGAATTGCCCCCGAGGGTCTATAATTGCCTCAA  
AAGGTCTAATATCAATACATTTTTTAGAACTTTTGAATAACAGTCAAGAAGAAGCTTATGAAAATTCAAGATTTTCGGATAG  
AAGATGTA AACATATATTGGACGTTCTA-----GAAATATAA-----  
-----  
-----ATGCTTGAGGGT---GGA---  
AATGAGGAAATCTCTACAATACCCGGATTTAATCAGATACAATTTGAAGGGTTTTGTAGGTTTCATTGATCAGGGCTTAAC  
AGAAGAAGCTTTATAAGTTTTCCAAAGATTGAA-----  
GATACAGATCAAGAAATTGAATTTCAATTATTTGTGGAAACATATCAATTGGTAGAACCGTTGATAAAAAGAAAGAGATGC  
TGTATATGAATCACTC---ACATATTCTTCTGAATTATATGTATCCGCGGGGATTAATTTGGAAAACC-----  
AGTAGGGATATGCAAGAACAACAATTTTTATTGGAAACATTCCCTCTAATGAATTCCTGGGAACTTCTATAGTAAATGG  
AATATACAGAATTGTGATCAATCAAATATTGCAAAGCCCCGGTATCTATTACCGGTGAGAATTGGACCAT---AACGGA-  
--ATTTTCG--  
GTCTATACCCGGCACCATAATATCAGATTGGGGAGGAAGATTAGAATTAGAGATTGATAGAAAAGCAAGGATATGGGCTCG  
TGTGAGTAGGAAACAGAAAATATCTATTCTAGTTCTATTATCAGCTATGGGCTTGAATCTAAGAGAAATTCTAGAGAATG  
TTTGTACCCTGAAATTTTCTTGTCTTTTCTGAAAGATAAGGAA-----  
AAAAAAAAAATTAAGTCAAAAGAAAATGCCATTTTGGAGTTTTATCAACAATTT-----GCTTGTGTAGGCGGAGAT--  
-CCGGTATTT---  
TCTGAATCCTTATGTAAGGAATTACAAAAAAATTTCTTTCAACAAAGATGTGAATTAGGAAGAATTGGTCGACGAAATAT  
GAACCGTAGACTGAATCTTGATATACCTCAGAACACTACATTTTTGTTACC GCGAGATATATTGGCAGCTGCGGATCATT  
TGATTGGAATGAAGTTTCGGAATGGGTATACTTGACGAT-----  
ATGAATCATTGAAAAATAACGATTTCGTTCTGTAGCGGATCTCTTACAAGATCAATTCGGATTGGCCCTGGTTTCGTTT  
AGAAAATATGGTTAGAGGAAGTATGTGTGGAGCAATTAGGCATAAATTGATACCGACTCCT-----  
CAAAATTTGGTAACTTCCACTACA-----  
TTAACAATACTTATGAATCTTTTTTCGGATTACACCCATTATCTCAAGTTTTGGATCGAACTAATCCATTGACACAAAT  
AGTTCATGGAAGAAAAGCGAGTTATCTGGGCCCTGGAGGATTGACAGGGCGAACTGCTAGTTTTTCGGATACGAGATATCC  
ATCCTAGTCACTATGGACGCATTTGTCTATAGATACGTCGGAAGGAATCAATGTTGGACTTATTGGATCCTTAGCAATT  
CATGCGAGGATTGGTCAT---TGGGGATCTCTAGAAAAGTCCGTTTTATGAA-----ATCTCT---GAGAGATCAAAA--  
-----AAAGTACGAATGCTTTTTATTTATCACAAGTATA-----GATGAATACTAT-----  
ATGGTAGCGGGCGGAAATTTCTTTGGCACTGAATCGAGGT---AGTCAGGAAGAACAGGTTGTTCCG---  
GCTCGATACCGTCAAGAATTCTTGACTATTGAGTGGGAACAGGTTTCATCTTCGAAGTATTTTTCCCTTCCAATATTTTTTC  
TATTGGAGCTTCCCTTATTCCTTTTTATCGAGCATAATGATGCGAATCGTGCTTTAATGAGTTCTAATATGCAACGTC AAG  
CCGTTCCGCTTTCTCGATCGGAAAAGTGCATTGTTGGAAGTGGGTTGGAATGCCAAGTGGCTCTAGATTCCGGGGTTCC  
ACTATAGCCGAACATCAGGGAAAGATCATTATACCGATACTGAGAAGATCATTTTATCGGGCAATAGA---GAT-----  
-----ACT-----  
TTAAGCATTCCATTAGTTATATATCAACGTTCTAACAAAAATACTTGTATGCATCAAAAACCCCAAGTTTCGCGAGGT--  
-----  
AAATGTATTA AAAAGGGACAGATTTTAGCGGATGGTGCTGCTACAGTTGGCGGCGAACTCGCTTTGGGAAAAAATGTATT  
AGTAGCTTATATGCCATGGGAAGGTTACAATTCTGAGGATGCAGTACTCATTAAACGAGCGTCTGGTATATGAGGATATTT  
ATACTTCTTTTACATACGGAAATATGAAATTCATACTCATGTGACAAGCCACGGG---CCT---  
GAAAGAATCACTAATGAAATACCGCATCTAGAAGCCCATTTACTCCGAAATTTAGACAAAAATGGCATTGTGATGTTGGG  
GTCTTGGGTGGAGACGGGCGATATTTTAGTAGGTAATTAACGCCTCAGATGGCGAAAGAA---  
TCATCGTATGCTCCGGAAGATAGATTATTACGAGCCATACTTGGCATTGAGATATCCATTTCAAAGGAACTTGTCTAAA  
ACTACCTATAGGCGGTAGAGGTGAGATTATTGATGTGAGATGGATCCAGAAA---  
AAGGGGGGTTCTAGTTATAATCCAGAAAACGATT---  
CGTGTATATATTTACAAAAACGTGAAATCAAAGTGGGCGATAAAGTAGCTGGAAGGCATGGAATAAAGGTATCGTTTT  
AAAAATTTTACCTAGACAAGATATGCCTTATTTGCAAGATGGAAGACCTGTTGATATGGTCTTCAACCCATTAGGAGTAC  
CTTCACGAATGAATGTAGGACAGATATTTGAATGTTTCGCTCGGGTTAGCGGGGGGGTTGCTAGATAGACATTATCGAATA  
GCACCTTTTGTGAGAGATATGAACAAGAGGCCTCGAGAAAAGTACTGTTTTCTGAATTATATGAAGCCAGTAAGCAAAC  
AGCGAAT---  
CCATGGGTATTTGAACCCGAGTATCCGGGAAAAAGCAGAATATTTGATGGAAGAACGGGGGATCCTTTTGGCAACCTGT  
TATAATAGGAAAGCCTTATATCTTGAATTAATTCATCAAGTTGATGATAAAAATACATGGACGTTGCAGTGGACATTATG  
CACTTGTACACAACAACCCCTTAGAGGAAGGGCCAAGCAAGGGGGACAGCGGGTAGGAGAAATGGAAGTTTGGGCTCTA  
GAGGGATTTGGTGTGCTCATATTTTACAAGAGATGCTTACTTATAAATCTGATCATATTAGAGCTCGTCAAGAAGTACT  
TGGTACTACAATGTTTGGAGGACCAATACCTAAACCCGAG-----  
GATGCTCCAGAATCTTTTCGATTGCTCGTTTCGAGAAGTACGATCCTTGGCTCTGGAATTGAATCATTTCCTTGTATCT--  
----GAGAAGAAGTTC-----CAGATTAAT-----AGGAAGGACGTTTAA-----



ATGATCGATCGGTAT-----  
AAACATCAACAACCTTCGAATTGGATCAGTTTTCTCTCAACAAATAAGTGCTTGGGCCAAAAAATCCTACCTAATGGAGA  
AATAATTGGAGAGGTGACAAAACCTACACTTTTCATTAC-----  
AAAACCAATAAACCTGAAAAAGATGGATTATTTTGTGAAAGAATTTTTGGGCCTATAAAAAGTGGGATTTGTGCTTGTGG  
AAATTAT-----CGAGTAATCGGAAATGACAAAGAA---  
GACCCGAAATTTTGTGAACAATGCGGGGTGCAATTTGTTGATTCTCGGATACGAAGATACCAAATGGGCTACATCAAAC  
GGCATGCCAGTAACCCATGTGTGGTATTTGAAACGTCTTCTAGTTATATCGCCAATCTTTTAGATAAGCCTCTTAAAG  
AATTAGAAGGCCTAGTATACTGCGAT-----  
TTTTCTTTTGTAGGCCCATAGCTAAAAAACCTACT---TTCTTACGATTACGAGGT---TCATTGCAATAT-----  
-GAAATCCAATCCTGGAAATATAGCATCCCACTTTTTTTTACTACC-----  
CAAGGTTTCGATGCATTTGAAATCGAGAAATTTCTACTGGAGCAGGTGCTATCCGAGAACAATTAGCCGATCTAGATTT  
GCCAATTATTATAGATTATTCATTGGTGAATGGAAAGAATTAGGGGAA-----  
GAAAGG-----CCTACG-----GTT-----AATGAA-----TGGGAAGATCGAAAAGTTGGA-----  
----

AGAAGAAAGGATTTTTTGGTTAGACGCATGGAATTAGCTAAGCATTTTTATTGCAACAAATATAGAACCAGAATGGATGGT  
TTTATGTCTATT

Nandina

CTTTTTCTCGAAATATGGACGAATGGAAGTTAACTCCTAAAGAAGCACTTCACGAAGCCTCCCGTAATTTGATTGATTT  
ATTTATTCCTTTTCTACATGCGGAAGAA-----CAAGACATAATT-----TTAGAGGACAATCAA---  
AACAGGGTTACTTTACCTTTTTTTACCTTTTCATGATGGA-----TTGGCT-----AACTAAAA-----  
AAAAAAAACGAAATAGCATTGAAATTTATTTTTATTGACCAATCAGAATTGCCTTCCAGGACTTATAATTGCCTCAAAAA  
GTCCAATATAAATACATTATTAGACCTTTTGAATAAGAGTCAAGAAGATCTTCTGAAAATTGAACATTTTTCGAATAGAAG  
ATGTA AAAAGGGTATTGGGCATTCTA-----CAAAGCGTTTTGTA---  
ATTGATTTACCGAAGAATAAGTTTTCAAATTGA-----

-----ATGCTTCGAGAT---GCA---

AATGAGGGAATGTCTACAATACCTGGGTTTAGTCAGATACAATTTGAGGGATTTTGTAGGTTTCATTGATCGGGGCTTGAT  
GGAAGAACTTAATAAGTTTCCAAAAATTGAA-----  
GATACAGATCAAGAATTTGAATTTCAATTTTGTGGAAACATATCAATTGGTGAACCTTTAATAAAAAGAAAGAGATGC  
TGTGCATGAATCACTC---ACATATTGTTCTGAATTATATGTACCTGCGGGATTAATTTGGAAAACC-----  
GGTAAGGATATACAAGAACAACCATATTTATTGAAACATTCCTCTAATGAATCCCTGGGAACCTCTATAGTAAATGG  
AATATACAGAATAGTGATCAATCAAATATTGCAAAGTCCCGGTATTTATTACCGTTTCAAGATTGGACCAT---AACGGA-  
--ATTTCG---

GTCTATACCGGTACCATAATATCAGATTGGGGAGGAAGATCAGAATTAGAGATTGATAGAAAAGCAAGGATATGGGCGCG  
TGTGAGTAGGAAACAAAAATATCTATTTTAGTTCCATCATCAGCTATGGGTTGCAATCTAAAAGAAATTATAGATAATG  
TTTGCTATCCTGAAATTTTCTTGTCTTTTCCGAATGATAAGGAG-----  
AAAAAAAATTTGGGTCAAAGAAAATGCCATTTTGGAGTTTTATCAACAATTT-----GCTTGTGTAGGTGGGGAT--  
-CCAGTATTT---

TCTGAGTCCTTATGTAAGGAATTACAAAAGAAATTTTTTCAACAAAGATGTGAATTAGGAAGGATTGGGCGACGAAATAT  
GAACAGGAGACTTAATCTTGATATACCTCATAACATTACATTTTTGTTACCGCGGGATGTATTGGCAGCTGCGGATCACT  
TGATCGGAATGAAGTTTGGAAATGGGTACACTTGACGAT-----  
ATGAACCACTTGAAAAATAACGCATTCTGTTCTGTAGCGGATCTGTTACAAGATCAATTCGGATTGGCTATGGTTCGTTT  
AGAAAATGCAGTTCGAGGAACTATAGGTGGAGCAATTAGGCCAAAAATTGATACCGACTCCT-----  
CATAATTTGGTAACTTCAACTCCA-----

TTAACAACCACTTATGAATCATTTTTCGGCCTACACCCCTTATCTCAAGTTTTGGATCGAACAAATCCATTGACACAAAT  
AGTTCATGGGCGAAAAATCGAGTTATTTGGGCCCTGGGGGTTGACAGGGCGGACTGCTAGTTTTCCGATACGAGATATCC  
ATCCTAGTCACTATGGACGTATTTGCCAATTGACACATCTGAAGGAATCAATGTTGGACTCATTGGATCCTTAGCAATT  
CATGCGAGGATTGGTCAT---TGGGGTCTTTAGAAAAGACCTTTTTATGAA-----ATTTCT---GAGAGATCGAAA--  
-----GGGGTACGGGTGATTTATTTATCACCAGTATA-----GATGAATACTAT-----  
ATGGTAACGGCAGGAAATCTTTGGCATTAAATCATGGT---ATTGAGGAAGAAGAGGTTGTTCCCT---  
GCTCGATACCGTCAAGAATTCCTGACTATTGCATGGGAACAGATTGAGCTTCGAAGCATTTTTTCCCTTCCAATATTTTTT  
TGTTGGAGCTTCCCTCATTCTTTTATCGAGCACAATGATGCGAATCGGGCTTTAATGAGTTCTAATATGCAACGTCAAG  
CAGTTCCGCTTTCTCGATCCGAGAAGTGCATTGTTGGAACCTGGGTTGGAACGCCAAGCGGCCCTAGATTCCGGGGTTTCC  
GCTATAGCTGAACACGAGGGAAAGATCATTATACCGATACTGACAAGATCATTATTCGGGTAATGGA---GCC-----  
-----ACT-----

CTAAGCATTCCCTTGGTTATGTATCAACGTTCCAACAAAAACACTTGTATGCATCAAAAACCTCAGGTTTCGCGGGGT--  
----

AAATGTATTA AAAAGGGACAAATTTTAGCGGATGGTGTGCTGCTACAGTTGGTGGCGAAGCTCGCTTTGGGAAAAAACGTATT

AGTAGCTTATATGCCCTGGGAGGGCTACAATTTTGGAGGATGCGGTACTCATTAGTGAACGCCTGGTATATGGAGATATTT  
ATACTTCTTTTTCATATACGGAAATATGAAATTCAGACTCATGTGACAAGCCAAGGC---CCT---  
GAAAGAATCACTAATGAAATACCGCATTTAGAAGCCCATTACTCCGCAATTTAGACAGAAATGGAATTGTGATGCTGGG  
CTCTTGGGTAGAAACGGGCGATATTTTAGTAGGTAATTAACACCCGAGGTGGCGAAAGAA---  
TCATCATATGCCCCGGAAGATAGATTATTACGAGCCATACTTGGCATTCCAGGTATCCACTGCAAAGGAAACTTGTCTAAA  
ATTACCTATAGGTGGCAGGGGTCGAGTTATTGATGTGAGATGGATCCATAAA---  
AAAGGGGGTTCCAGTTATAATCCAGAAACGATT---  
CGTGTATATATTTTACAGAAACGTGAAATCAAAGTAGGTGATAAAGTAGCTGGAAGACATGGGAATAAGGGTATCATTTC  
TAAAATTTTGCCTAGGCAAGATATGCCTTATTTGCAAGATGGAACACCTGTTGATATGGTCTTCAACCCATTAGGAGTAC  
CTTACGAATGAATGTAGGACAGATTTTGAATGCTCGCTCGGGTTAGCGGGGGTCTGCTAGACAGGCATTATCGAATA  
GCACCTTTGATGAGAGATATGAGCAAGAGGCTTCGAGAAAAGTAGTGTCTTCTGAATTATATGAAGCCAGTAAGCAAAC  
AGCGAAT---  
CCATGGGTATTTGAACCCGAATATCCGGGAAAAAGCAGAATTTTGTGGAAGAACGGGGGATCCTTTTCGCACAACCTGT  
TATAATAGGAAAGTCTATATCCTGAAATTAATTCATCAAGTTGATGATAAAATCCACGGACGTTCCAGTGGACATTACG  
CGCTTGTACACAACAACCTCTTAGAGGAAGGGCCAAGCAAGGGGGACAACGGGTAGGAGAAATGGAAGTTTGGGCTCTA  
GAGGGATTTGGTGTGCTCATATTTTACAAGAGATGCTTACTTATAAATCTGATCATATTAGAGCTCGTCAAGAAGTACT  
TGGTACTACGATCATTGGAGGAACAATACCTAACCCCGAG-----  
GATGCTCCAGAATCTTTTCGATTGCTCGTTCGAGAACTACGATCTTTGGCTCTAGAACTGAACCATTTCTTGTATCT--  
-----GAGAAGAAGTTC-----CAGATTAAT-----AGGAAGGAAGCT-----  
ATGATCGACCGGTAT-----  
AAACATCAACAACCTTCGAATTGGATCAGTTTCTCCTCAACAAATAAGTGCTTGGGCCAAAAAATCCTACCTAATGGAGA  
GATGGTTGGAGAGGTGACAAAACCTATACTTTTCATTAC-----  
AAAACCAATAAACCGGAAAAAGATGGATTGTTTTGTGAAAGAATTTTGGGCCTATAAAAAGTGAATTTGTGCTTGTGG  
AAATTAT-----CGAGTAATCGGAGATAAAAAAGAA---  
GACCCGAAATTTTGTGAACAATGCGGAGTCAATTTGTTGATTCTCGGGTACGAAGATATCAAATGGGATACATTAACT  
GGCATGTCCAGTAACTCATGTGTGGTATTTGAAACGTCTTCTAGTTATATCGCGAATCTTTTAGATAAACCTCTTAAAG  
AATTAGAAGGCCTCGTATACTGCGAT-----  
TTTTTGTGTGCTAGGCCCCGTAGCTAAAAAACCTACT---TTCTTACGATTACGAGGT---TCATTGCAATAT-----  
-GAAATACAATCTTGGAAATATAGCATCCCACTTTTTTTTACTACT-----  
CAAGGCTTCGATCACTTTTCAAAATAGAGAAATCTCGACTGGAGCAGGTGCTATCAGAGAACAATTAGCCGATCTAGATTT  
GCGACTTATTACAGATTCTTTCATTGGTTGAATGGAAAGAATTAGGGGAA-----  
GAAGGA-----GCCACC-----GGT-----AATGAA-----TGGGAAGATAGAAAAATTGGA-----  
-----  
AGAAGAAAGGATTTTTTGGTTAGACGCATGGAATTAGCTAAGCATTTTTATTGAAACAAACGTAGAACCAGAACGGATGGT  
TTTGTGCCTATT  
Nicotiana  
CTTTTTCTCGAAATATGGACAAACGGAAGTTTAACTCCGAAAGAAGCACTTCATGAAGCATCCCGAAATTTAATTGATTT  
ATTTATCCCTTTTACATATGGAGGAA-----GACAACCTTATAT-----TTACAGGACAATCAA---  
CACACGGTTCCTTTTATCCCCTTTTACCTTTTATGATAAA-----TTGGCT-----AAACTCATA-----  
AAAAACAAAAAATAGCATTGAAATCGATTTTTATTGACCAATCAGAATTGCCTTCCAGGATCTATAATTGCCTCAA  
AATGTCCAATATATACATTGTTGGACCTTTTGAATAACAGCCAAGAAGATCTTATGAAAATTGAACATTTTCGTAGCG  
AAGATGTAAAACGGATATTGGGCATTTTA-----GAAAAATATTTTCGTA---ATTGAT-----  
-----  
-----ATGCTCGGGGAT---GGA---  
AATGAGGGAATATCTACAATACCTGGATTTAATCAGATAACAATTTGAAGGATTTTGTAGGTTTATTGATCAAGGTTTGC  
GGAAGAACTTTATAAGTTTCCAAAAATTGAA-----  
GATACAGATCAAGAAATTTGAATTTCAATTTTGTGGAAACATATCAATTTGGTTCGAACCTTGGATAAAGGAAAGAGATGC  
TGTGTATGAATCACTC---ACATATTCTTCTGAATTATATGTATCCGCGGGATTAATTTGGAAAAAC-----  
AGTAGGGATATGCAAGAACAACAATTTTTATCGGAAACATTCTCTAATGAATTCCTGGGAACTTCTATAGTCAATGG  
AATATATAGAATTGTGATCAATCAAATATTGCAAAGTCCCGGTATTTATTACCGATCAGAATTGGACCAT---AACGGA-  
---ATTTCG---  
GTCTATACCGGCACCATAATATCAGATTGGGGAGGAAGATCAGAATTAGAAATTGATAGAAAAGCAAGGATATGGGCTCG  
TGTAAGTAGGAAACAAAAAATATCTATTCTAGTTCTATCATCAGCTATGGGTTTGAATCTAAGAGAAATTCTAGAGAATG  
TTTGCTATCCTGAAATTTTTTTGTCTTTTCTGAGTGATAAGGAG-----  
AGAAAAAATTTGGGTCAAAAGAAAATGCCATTTTGGAGTTTTATCAACAATTT-----GCTTGTGTAGGTGGCGAT--  
-CCGGTATTT---  
TCTGAATCCTTATGTAAGGAATTACAAAAGAAATCTTTCAACAAAGATGTGAATTAGGAAGGATTGGTTCGACGAAATAT

GAACCGAAGACTGAACCTTGATATACCCCAGAACAATACATTTTTTGTACCACGAGATATATTGGCAGCCGCCGATCATT  
TGATTGGGCTGAAATTTGGAATGGGTGCACCTTGACGAT-----  
ATGAATCATTTGAAAAATAAACGTATTCGTTCTGTAGCAGATCTTTTACAAGATCAATTCGGATTGGCTCTGGTTCGTTT  
AGAAAATGTGGTTCGGGGGACTATATGTGGAGCAATTCGGCATAAATTGATACCGACACCT-----  
CAGAATTTGGTAACCTCAACTCCA-----  
TTAACAACACTACTTATGAATCCTTTTTTCGGTTTACACCCATTATCTCAAGTTTTGGATCGAACTAATCCATTGACACAAAT  
AGTTCATGGGAGAAAATTAAGTTATTTGGGCCCTGGAGGACTGACAGGGCGCACTGCTAGTTTTTCGGATACGAGATATCC  
ATCCTAGTCACTATGGACGTATTTGCCCAATTGACACATCTGAAGGAATCAATGTTGGACTTATTGGATCCTTAGCAATT  
CATGCGAGGATTGGTCAT---TGGGGATCTCTAGAAAGCCCTTTTTATGAA-----ATTTCT---GAGAGGTCAACC--  
-----GGGGTACGGATGCTTTATTTATCACCAGGTAGA-----GATGAATACTAT-----  
ATGGTAGCGGCAGGAAATTTTACGCTTAAATCAGGAT---ATTCAGGAAGAACAGGTTGTTCCA---  
GCTCGATACCGTCAAGAATTTTACTATTGCTATGGGAACAGGTTTCACTCTTCAAGTATTTTTCTTTTTCAATATTTTTCT  
TATTGGAGCTTCCCTCATTCTTTTTATCGAACATAATGATGCGAATCGAGCTTTAATGAGTTCTAATATGCAACGTCAAG  
CAGTTCCTCTTTCTCGCTCCGAGAAATGCATTGTTGGAACGGGTTGGAACGACAAGCAGCTCTAGATTCGGGGGCTCTT  
GCTATAGCCGAACGCGAGGGGAAGGGTCGTTTATACCAATACTGACAAGATTCTTTTAGCAGGTAATGGA---GAT-----  
-----ATT-----  
CTAAGCATTCCATTAGTTATATATCAACGTTCCAATAAAAAATACTTGTATGCATCAAAAACCTCCAGGTTCTCGGGGT--  
----  
AAATGCATTAAAAAGGGACAAATTTTAGCGGATGGTGCTGCTACGGTTGGTGGCGAACTTGCTTTGGGGAAAAACGTATT  
AGTAGCTTATATGCCGTGGGAGGGTTACAATTTCTGAAGATGCAGTACTTATTAGCGAGCGTTTTGGTATATGAAGATATTT  
ATACTTCTTTTACATACGGAAATATGAAATTCAGACTCATGTGACAAGCCAAGGC---CCT---  
GAAAAAGTAACTAATGAAATACCGCATTTAGAAGCCCATTACTCCGCAATTTAGATAAAAAATGGAATTGTGATGCTGGG  
ATCTTGGGTAGAGACAGGTGATATTTTAGTAGGTAAATTAACACCCCAGGTCGTGAAAGAA---  
TCGTGCTATGCCCCGGAAGATAGATTGTTACGAGCTATACTTGGTATTCAGGTATCTACTTCAAAGAACTTGTCTAAA  
ACTACCTATAGGTGGCAGGGGTCGGGTTATTGATGTGAGGTGGATCCAGAAG---  
AGGGGTGGTTCTAGTTATAATCCCGAAACGATT---  
CGTGTATATATTTTACAGAAACGTGAAATCAAAGTAGGCGATAAAGTAGCTGGAAGACACGGAAATAAAGGTATCATTTC  
CAAAATTTTGCCTAGACAAGATATGCCTTATTTACAAGATGGAAGATCCGTTGATATGGTCTTTAACCATTAGGAGTAC  
CTTCACGAATGAATGTAGGACAGATATTTGAATGTTCACTAGGGTTAGCAGGGAGTCTGCTAGACAGACATTATCGAATA  
GCACCTTTTGTAGAGATATGAACAAGAAGCTTCGAGAAAACCTGTGTTTTCTGAATTATATGAAGCCAGTAAGCAAAC  
AGCGAAT---  
CCATGGGTATTTGAACCCGAATATCCAGGAAAAAGCAGAATATTTGATGGAAGGACGGGGAATCCTTTTTGAACAACCCGT  
TATAATAGGAAAGCCTTATATCTTGAATTAATTCATCAAGTTGATGATAAAATCCATGGGCGCTCCAGTGGACATTATG  
CGCTTGTTACACAACAACCCCTTAGAGGAAGAGCCAAACAGGGGGGACAGCGGGTAGGAGAAATGGAGGTTTGGGCTCTA  
GAAGGGTTTGGGGTTGCTCATATTTTACAAGAGATGCTTACTTATAAATCGGATCATATTAGAGCTCGCCAGGAAGTACT  
TGGTACTACGATCATTGGGGGAACAATACCTAATCCCGAA-----  
GATGCTCCAGAATCTTTTCGATTGCTCGTTCGAGAACTACGATCTTTAGCTCTGGAACCTGAATCATTTCCTTGTATCT--  
----GAGAAGAAGCTTC-----CAGATTAAT-----AGGAAGGAAGCT-----  
ATGATCGATCGATAT-----  
AAACATCAACAGCTCCGAATTGGATCAGTTTTCTCCTCAACAAATAAGTGCTTGGGCCACTAAAATCCTGCCTAATGGAGA  
GATAGTTGGAGAGGTAACAAAACCTTATACTTTTCATTAC-----  
AAAATAACAAACCGGAAAAAGATGGATTATTTGTGAAAGAATTTTTGGTCTATAAAAAGCGGAATTTGTGCTTGTGG  
AAATTAT-----CGAGTAATCGGAGATGAAAAAGAA---  
GACCCGAAATTTTGTGAACAATGCGGGGTGCAATTTGTTGATTCTCGGATACGAAGGTATCAAATGGGCTATATCAAAC  
CGCATGCCAGTAACCCATGTGTGGTATTTAAAACGTCTTCTAGTTATATTGCGAATCTTTTAGATAAACCTCTTAAAG  
AATTAGAAGGCCTAGTATACTGCGAT-----  
TTTTCTTTTGTAGGCCATAACTAAAAAGCCCACT---TTCTTACGATTACGAGGT---TTATTGCAATAT-----  
-GAAATCCAATCTTGGAAATACAGCATCCCACTTTTTTTTACTACC-----  
CAGGGTTTCGATACATTTTCGCAATCGAGAAATCTCTACTGGCGCGGGTCTATCCGAGAACAATTAGCCGATCTAGATTT  
ACGAATTATTATAGAGAATTCGTTGGTAGAATGGGAAGAATTGGGGGAA-----  
GAAGGG-----CACACA-----GGG-----AATGAA-----TGGGAAGATCGAAAAGTTGGA-----  
----  
AGAAGAAAGGACTTTTTGGTTAGACGCGTGGAAATTGGCTAAGCATTTTTATTGCAACAAATATAGAGCCAGAATGGATGGT  
TTTGTGTCTATT  
Nuphar  
CTTTTTCTCGAAATATGGACGAATGGAAGTTAACTCCTAAAGAAGCGCTTTACGAAGCTTCTCGTAATTTGATCGATTT  
ATTTATTCTTTTCTACATGCGGAGGAA-----CAGGACATAAAT-----ATAGAAGACAATCTA---

AAAAGGGCTACTGTGCCCTTTTTTACCTTTCATGATGGA-----TTGGAT-----AATATG-----  
-  
AAAAGAGAAATCATATTGAAACGTATTTTTATTGATCAATCAGAATTGCCTCCTAGGACTTATAACTGTCTCAAAAAGTC  
TAATATACATACATTATTGAACCTTTTGAGTAAGAGTCAAGAAGATCTTATGAGAATTGAGCATTTCGCGTAGAAGACG  
TAAACAAATATTCGACATTCTA-----CAGAAGGGTTTCACA---ATCGACTTGCTTAAAAATAAAAAATAAG---  
TTT-----  
-----ATGCTCCGGGATGGTGGA---  
GATGAGGGAATGTTTACAATACCTGGATTTAGTCAGATCCAATTTGAGGGATTTTGTAGGTTTATTGATCAGGGCTTGAT  
GGAAGAACCTTCATCAATTTCCAAAAATTGAG-----  
GATACGGATCAAGAAATGAATTTAAATTTTGGGGAATCATATCAATTTGGTGGAACTTTGATAAAAAGAAAGAGATGC  
TGTGTATGAATCAATT---ACATATTCCTCTGAGTTATATGTACCCGCGGGTTAATTTGGAGAACC-----  
GGTAGAAATATGCAAGAACAACCGTATTGCTTGGAACATTCCTCTAATGAATTCCTCGGGAACCTCTATAGTAAATGG  
AATTTACAGAATTTGTCATCAATCAAATATTGCAAAGTCCCAGTATTTATTACGGTACAGGATTGGATCAT---AACGGA-  
--ATTTCT---  
GTCTATACTGGCACCATAATATCAGATTGGGGAGGAAGATCAGAATTAGAGATTGATAGAAAAGAAAGGATATGGGCCCG  
TGTAAGCAGGAAACAAAAATTTCTATTCTAGTTCTACCATCAGCTATGGGTTCAAGTCTAAGAGAAATTTAGACAATG  
TTTGCTACCCTGAAATTTTCTTGTCTTTCCCAAACGAGAAGGAG-----  
AAAAAAAAGATTGGTTCAAAGGAAAATGCCATTTTAGAGTTTTATCAAAAATTT-----GCTTGTGTAGGCGGGGAT--  
-CCGGTGTT---  
TCTGAGTCCTTATGTAAAGAATTACAAAAGAAATTTTTCAACAAAGATGTGAATTAGGAAGGATTGGTCGACGAAATAT  
GAACCAGAGACTGAATCTTGATATACCCCAAGAACAATACATTTTTGTTACCACGAGATGTATTGGCTGCTGCCGATCATT  
TGATCGGAATTAATTTGGAATGGGTACACTTGACGAT-----  
ATGAATCACTTGAAAAATAAACGTATTCGTTCTGTAGCGGATCTGTTACAGGATCAATTCGGATTGGCTTTGGTTGCTT  
GGAAAATGTGGTTGAGGAACTATATGTGGAGCAATTCGGCATAAATTGATACCGACTCCT-----  
CATAATTTGGTAACTTCAACTCCA-----  
TTAACAACAACCTTATGAATCATTTTTCGGCCTACACCCTTTATCTCAAGTCTTGGATCGAACTAATCCATTGACACAAAT  
AGTTTATGGGCGAAAAATCGAGTTATTTGGGTCTGGGGGATTTGACAGGACGAACTGCTAGTTTTCGTATACGAGATATCC  
ATCCTAGTCACTATGGACGTATTTGCCAATTTGACAGCTCCGAAGGAATCAATGTTGGACTTATTGGGTCTTAGCTATT  
CATGCAAGGGTTGGTGAT---TGGGGGTCTATAGACACCCCGTTTTATGAA-----ATATCT---GAGAGATCAAAA--  
-----GAGGAACAGATGTTTTATTTATCACCAAGTAGA-----GATGAATACTAT-----  
ATGGTGGCGGCGGAAATTTCTTTGGCGTTGAATCGGGGT---ATTCAGGAAGAAGAAGTTGGTCCA---  
GCTCGATACCGTCAAGAATTTGACTATTGCATGGGAACAGATTCATCTTCGAAACATTTATCCCTTCCAATATTTTTTC  
TATTGGAGCTTCCCTCATTCTTTTATCGAGCATAATGATGCGAATCGGGCTTTAATGAGTTCTAATATGCAGCGTCAAG  
CAGTTCCGCTTTCTCAGTCCGAAAAGTGTATTGTTGGAACCGGGTTGGAACGCCAAGCGGCTCTCGATTGAGGGGGTTG  
GCTATAGCCGAACGCGAGGGAAAGATCATTATACCGATGCTGAAAAGATCATTATCAGGTAATGGA---GAC-----  
-----ACT-----  
ATAAGCATTCCGTTGGTTATGTATCAGCGTTCCAACAAAAATACTTGGATGCATCAAAAACCTCAGGTTTATCGGGGT--  
----  
AAATACCTTAAAAAGGGGCAAATTTTGGCGGATGGTGC GGCTACGGTTGGTGGCGAACTCGCTTTGGGGAAAAATGTATC  
AGTAGCTTATATGCCATGGGAAGGTTACAATTTGAAAGACGCGGACTCGTTAGTGAACGTCTAGTCTATGACGATATTT  
ATACTTCTTTTTCATATCCGGAAATATGAAATTCAGACTCATGTGACAAGCCAAGGA---CCT---  
GAAAGAATCACTAATGAAATACCTCATTTAGAGCCTTATTTACTCCGCAATTTAGACAGAAATGGAATTGTGATGCTGGG  
ATCTTGGGTAGAACTGGTGATGTTTTAGTAGGTAAATTAACGCCTCAGACAGCGAAAGAA---  
TCATCCTATGCCCCAGAAGATAGATTATTACGAGCCATACTTGGCATTGAGGATCCACTGCAAAGGAACTTGTCTAAA  
GTTGCCTATAGGCGGAAGAGGTCGAGTTATTGATGTGAGATGGGGCCAGAAA---  
AGGGGGGGTTCCATTTATAATCCAGAAATGATT---  
CGTGTATATATCTCACAGAAAACGTAAAAATCAAAGTGGGCGATAAAGTAGCTGGAAGACATGGGAATAAAGGTATCATTTC  
AAAAATTTTGCCTAGACAGGATATGCCTTATTTGCAAGATGGAACACCAGTTGATATGGTATTCAATCCATTAGGAGTAC  
CTTCGCGAATGAATGTGGGACAGATGTTTGAATGCTCACTCGGATTAGCGGGAGACCTGCTGGGCAGACATTATAGAATA  
ACACCCTTTGATGAGAGATACGAGCAAGAGGCTTCGAGAAAACCTAGTGTCTTCTGAATTATATGAAGCCAGTAAGCAAAC  
AGCAAAT---  
CCATGGGTATTTGAAACCGAGTATCCTGGAAAGAGCAGAATATTTGATGGAAGAACAGGAGATCCTTTTGAACAACCTGT  
TATAATAGGAAAGTCTTATATGTTAAAATTAATTCATCAAGTTGATGATAAAATCCACGGGCGTTCCAGTGGTCATTATG  
CACTTGTACACAACAACCCCTTAGGGGAAGGGCTAAGCAAGGTGGACAACGAGTAGGAGAAATGGAAGTTTGGGCTCTA  
GAGGGATTTGGTGTGCTCATATTTTACAAGAGATGCTCACTTATAAATCCGATCATATTAGAGCTCGTCAGGAAGTACT  
TGGTACCACGATCGTTGGGGGAACAATACCTAATCCTGAG-----  
GGTGCGCCAGAATCTTTTCGATTGCTCGTTTCGCGAACTACGATCTTTATCTCTGGAAGTGAATCATTTCCTTGTATCT--

----GAGAAAACTTC-----CAGATTAAT-----AGGAAGGAAGTT-----  
ATGATCGACCAGTAT-----  
AAACATCAACAACCTTCGAATTGGATCAGTTTTCTCTAAACAAATACATGCTTGGGCCAACAAAATCCTACCGAATGGAGA  
GATAGTTGGAGAGGTGACAAAACCTATACTTTTCATTAC-----  
AAAACCAATAAACCGGAAAAAGATGGGTTGTTTTGTGAAAGAATTTTTGGACCTATAAAAAGTGAATTTGTGCTTGTGG  
AAATTAT-----CGAGTGATCGGGGGCGAAAAAGAA----  
GAACCGAAATTTTGCGAACAATGCGGAGTCGAATCTGTTGATTCTCGGATCCGAAGATATCAAATGGGATACATCAAAC  
AGCATGTCCGGTGACTCATGTATGGTATTTGAAACGCCTTCCTAGTTATATCGCGAATCTTTCAGATAAACCTCTTAAGG  
AATTAGAAGGCCTGGTATACTGCGATGTG-----  
TATCCCAATTTTTCTTTTGCTAGGCCCATAGCTAAAAACCTACT---TTCTTACGATTACGAGGT---  
TCATTTCGAATAT-----GAAATCCAATCCCGGAAATACAGCATCCCACTTTTTTTTACTACC-----  
-----  
CAAGGCTTCGATACATTTAGAAATCGAGAAATATCTACCGGAGCTACTGCTATCAGAGAACAATTAGCCGATCCGGATTT  
GCGAATTATTATAGATCGTTTCATTGGTGAATGGAAGGAATTGGGAGAA-----  
GAAGGA-----TCAACC-----GGG-----AATGAC-----TGGGAAGACAGAAAAATTGGA-----  
-----  
AGGAGAAAAGATTTTTTGGTTAGACGCATGGAATTGGCTAAGCATTTCCTCGAACAAATGTAGAACCAGAATGGATGGT  
TTTGTGCCTATT  
Nymphaea  
CTTTTTCTTGAAATATGGACGAATGGAAGTTAACTCCTAAGGAAGCGCTTTATGAAGCTTCTCGTAATTTGATCGATTT  
ATTTATTCCTTTTCTACATGCGGAGGAA-----CAGGACATAAATAGAAATATGGAGGACAATCTA---  
AAAAGGGCTAGTGTGCCCTTTTTTGCCTTTGATGATGGA-----TTGGAT-----AATATA-----  
-  
AAAAGAGAAATCATATTGAAACGTATTTTTATTGATCAATTAGAATTGCCTCCTAGGACTTATAACTGTCTCAAAGGTC  
TAATATACATACATTACTGGACCTTTTGGTAAAAGTCAAGAAGATCTTATGAGAATTGAGCATTTCGCGTAGAAGACG  
TAAACAAATATTCGACATTCTA-----CAGAAGGGTTTACA---ATCGACTTGCTGAAAAATTCAAATCAG---  
TTTGAATCCCGT-----  
-----ATGCTCCGGGATGGTGA---  
GATGAGGGAATGTTTACAATACCTGGATTTAGTCAGATCCAATTTGAGGGATTTTGTAGGTTTCATTGATCAGGGCTTGAT  
GGAAGAACCTTCATCAATTTCCAAAAATTGAA-----  
GATACAGATCAAGAAATTGAATTTCAATTATTTGGGGAATCTTATCAATTGGTGGAACTTTGATAAAAAGAAAGAGATGC  
TGTGTATGAATCAATT---ACATATTCCTCTGAGTTATATGTACCCGCGGGTTAATTTGGAGAACC-----  
GGTAGAAATATGCAAGAACAACCGTATTGCTTGGAAACATTCCTCTAATGAATTCCTTGGGAACCTCTATAGTAAATGG  
AATTTACAGAATTGTCATCAATCAAATATTGCAAAGTCCTGGTATTTATTACAGTACAGGATTGGATCAT---AACGGA-  
--ATTTCT---  
GTCTATACTGGCACCATAATATCAGATTGGGGAGGAAGATCAGAATTAGAGATTGATAGAAAAGAAAGGATATGGGCCCG  
TGTAAGCAGGAAACAAAAAATTTCTATTCTAGTTCTATCATCAGCTATGGGTTCAAGTCTAAGAGAAATTCAGACAATG  
TTTGCTACCCTGAAATTTTCTTTGCTTTCCCAAACGAGAAGGAG-----  
AAAAAAAAGATTGGTTCAAAGGAAAATGCCATTTTAGAGTTTTATCAAAAATTT-----GCTTGTGTAGGCGGTGAT--  
-CCGGTGTT---  
TCTGAGTCCTTATGTAAGAATTACAAAAGAAATTTTTCAACAAAGATGTGAATTAGGAAGGATTGGCCGACGAAATAT  
GAACCAGAGACTGAATCTTGATATACCCCGAACAATACGTTTTTGTACCACGAGATGTATTGGCTGCTGCCGATCATT  
TGATCGGAATGAAATTTGGAATGGGTACACTCGACGAT-----  
ATGAATCACTTGAAAAATAACGTATTCGTTCTGTAGCGGATCTGTTACAGGATCAATTCGGATTGGCTTTGGTTCGCTT  
GGAAAATGTGGTTCGGGGAACATATGTGGAGCAATTCGGCATAAATTGATACCGACTCCT-----  
CGTAATTTGGTAACTTCAACTCCA-----  
TTAACAACAACCTTATGAATCATTTTTTCGGCCTACACCCTTTATCTCAAGTCTTGGATCGAACTAATCCATTGACACAAAT  
AGTTCATGGGCGAAAATCGAGTTATTTGGGTCTGGGGGATTGACAGGACGAACTGCTAGTTTTCGTATACGAGATATCC  
ATCCTAGTCACTATGGGCGTATTTGCCAATTGATACGTCCGAAGGAATCAATGTTGGACTTATTGGGTCTTAGCTATT  
CATGCAAGGGTTGGTGTAT---TGGGGTCTATAGAGACCCCATTTTATGAA-----ATATCT---GAGAGATCAAAA--  
-----GAAGAACAGATGGTTTTATTTATCGCCGAGTAGA-----GATGAATACTAT-----  
ATGGTGGCGGCGGAAATTTCTTTGGCGTTGACTCGGGGT---ATTCAGGAAGAAGAAGTTGGTCCA---  
GCTCGATACCGTCAAGAATTTTTGACTATTGCATGGGAACAGATTTCATCTTCGAAACATTTATCCCTTCCAATATTTTTTC  
TATTGGAGCTTCTCTCATTCTTTTATCGAGCATAATGATGCGAATCGGGCTTTAATGAGTTCTAATATGCAGCGTCAAG  
CAGTTCGCTTTCTCAGTCCGAAAAGTGTATTGTTGGAACCGGCTTGAACGCCAAGCGGCTCTCGATTGAGGGGTTTCG  
GCTATAGCCGAACGCGAGGGAAAGATCATTATACCGATGCTGAAAAGATCGTTTTATCAGGTAATGGG---GAC-----  
-----ACT-----

ATAAGCATTCCGTTGGTTATGTATCAGCGTTCCAACAAAAATACTTGGATGCATCAAAAACCTCAGGTTTCATCGGGGT--  
----  
AAATACCTTAAAAAGGGGCAAATTTTGGCGGATGGTGC GGCTACGGTTGGTGGCGAACTCGCTTTGGGGAAAAATGTATC  
AGTAGCTTATATGCCATGGGAAGGTTACAATTCTGAAGATGCCGTACTCATTAGCGAACGTCTAGTCTATGACGATATTT  
ATACTTCTTTTCATATCCGGAAATATGAAATTCAGACTCATGTGACAAGCCAAGGA---CCT---  
GAAAGAATCACTAATGAAATACCTCATTAGAGCCTTATTTACTCCGCAATTTAGACAGAAATGGAATTGTGATGCTGGG  
ATCTTGGGTAGAACTGGTGATGTTTTAGTAGGTAAATTAACGCCTCAGACAGCGAAAGAA---  
TCATCCTATGCTCCAGAAGATAGATTATTACGAGCCATACTTGGCATTGAGGTATCCACTGCAAAAAGAACTTGTCTAAA  
GTTGCCTATAGGCGGAAGAGGTCGAGTTATTGATGTGAGGTGGGGCCAGAAA---  
AAGGGGGGTTCCATTTATAATCCAGAAATGATT---  
CGTGTATATATCTCACAGAAACGTAAAATCAAAGTGGGCGATAAAGTAGCTGGAAGACATGGGAATAAAGGTATCATTTC  
AAAAATTTTGCCTAGACAGGATATGCCTTATTTGCAAGATGGAACACCTGTTGATATGGTATTCAATCCATTAGGAGTAC  
CTTCGCGAATGAATGTGGGACAGATGTTTGAATGCTCGCTCGGGTTAGCGGGAGACCTTCTGGGCAGACATTATAGAATA  
ACACCCTTTGATGAGAGATACGAGCAAGAGGCTTCGAGAAAACCTAGTGTTTTCTGAATTATATGAAGCCAGTAAGCAAAC  
AGCAAAT---  
CCATGGGTATTTGAACCCGAGTATCCTGGAAAGAGCAGAATATTTGATGGAAGAACAGGAGATCCTTTTGAACAACCTGT  
TATAATAGGAAAGTCTATATGTTAAAATTAATTCATCAAGTTGATGATAAAAATCCACGGACGTTCCAGTGGTCATTATG  
CACTTGTACACAACAACCCCTTAGGGGAAGGGCTAAGCAAGGTGGACAACGAGTAGGAGAAATGGAAGTTTGGGCTCTA  
GAGGGATTTGGTGTGCTCATATTTACAAGAGATGCTCACTTATAAATCCGATCATATTAGAGCTCGTCAGGAAGTACT  
TGGTACCACGATCGTTGGGGGAACAATACCTAATCCTGAG-----  
GGTGCGCCAGAATCCTTTTCGATTGCTCGTTTCGCGAACTACGATCTTTATCTCTGGAAGTGAATCATTTCCTTGTATCT--  
----GAGAAAACTTC-----CAGATTAAT-----AGGAAGGAAGTT-----  
ATGAATCAGAATTTTTCTTCTATGATCGATCAGTAT-----  
AAACATCAACAACCTTCGAATTGGATTAGTTTCTCCTAAACAAATACGTGCTTGGGCCAACAAAATCCTACCGAATGGAGA  
GATAGTTGGAGAGGTGACAAAACCTATACTTTTCATTAC-----  
AAAACCAATAAACC GGAAAAAGATGGGTGTTTTGCGAAAGAATTTTTGGACCTATAAAAAGTGGAAATTTGTGCTTGTGG  
AAATTAT-----CGAGTGATCGGGGGTGA AAAAGAA---  
GAACCGAAATTTGCGAACAATGCGGAGTCAATCTGTTGATTCTCGGATCCGAAGATATCAAATGGGATACATCAAAC  
AGCATGCCCGGTGACTCATGTGTGGTATTTGAAACGTCTTCTAGTTATATCGCGAATCTTTTAGATAAACCTCTTAAGG  
AATTAGAAGGCCTGGTATACTGCGAT-----  
TTTTCTTTTGCTAGGCCCATAGCTAAAAAACCTACT---TTCTTACGATTACGAGGT---TCATTGCAATAT-----  
-GAAATCCAATCCCGAAATACAGCATCCCACTTTTTTTTACTACC-----  
CAAGGCTTCGATACATTTAGAAATCGAGAAATATCTACCGGAGCTACTGCTATCAGAGAACAATTAGCCGATCTGGATTT  
GCGAATTATTATAGATCGTTTCATTGGTGGAAATGGAAGGAATTGGGAGAA-----  
GAAGGA-----TCAACC-----GGG-----AATGAC-----TGGGAAGATAGAAAAATTGGG-----  
----  
AGGAGAAAAGATTTTTTGGTTAGACGCATGGAATTGGCTAAGCATTCTTTCGAACAAATGTAGAACCAGAATGGATGGT  
TTTGTCCCTATT  
Oenothera  
CTTTTTCTCGAAATATGGACAAATGGAAGTTAACTCCTAAAGAAGCACTTCACGAAGCCTCCCGGAATTTAATTGATTT  
ATTTCTTCCCTTTCTGCATGCGGAAGAA-----GAAAACCTTACAT-----TTAGGAAAGAATAAG---  
TACAATGTGACTTTCCCCCTTTTTACTTTTCATAAAAA-----TTAGCT-----AAGCTAAGG-----  
AAACCGAAAAACGAAATAGCATTGAAATCTATTTTTATTGACCAATTAGAATTGCCCCCGAGGATCTATAATTCCTCAA  
AGGGTCCAAGATCCATACATTATCGGACCTTTTGAATAAGAGTCAAGAAGACCTTATGAAAATGAAACATTTTCGTATAG  
AAGATGTA AACAGATCTTGGACATTCTAGAAATAGAAAAAGCATTTCAT-----  
-----  
-----ATGCTCGGGGAT---GGA---  
AATGGGGGAATGTGTACAATACCTGGTTTTAATCAGATACAATTTGAAGGATTTTGTAGATTCATTGATCAGGGCTTAAC  
GGAAGAACTTTTCGAAATTTCCAAAAATTGAAGAC-----  
GATACGGATCAAGAAATGAAATTTCAATTATTTGTGGAAACATATCACTTGGTAGAACCTTTGATAAAAAGAACGAGATGC  
TGTATATGAATTACTC---ACATATTCTTCTGAATTATATATATCCGCGGGATTAATTTGGAAAAGC-----  
AGTAGGGATATGCAAAAACAAACCATTTTTATTGGAAACATTCTTTAATGAATTCCTGGGAACTTCTATAGTAAATGG  
AATATACAGAATTGTGATCAATCAAATATTACAAAGTCCCGGTATCTATTATCGGTGAGAATTGGACCAT---AACGGA-  
--ATTTG---  
GTCTATACCGGGACGATAATATCAGATTGGGGGGGAGGTTAGAATTAGAGATTGATAGAAAAGCAAGGATATGGGCTCG  
TGTGAGTAGGAAACAGAAAATATCTATTCTAGTCTATCATCAGCTATGGGTTTCGAATCTAAGAGAAATTTCTAGAGAATG  
TTTGTATCCTGAGATGTTCTTGTCTTTCTGAATGAGAAAGAG-----

AAAAAACAATTGGATCAAAAGAAAATGCCATTTTGGAGTTTTATCAACAATTT-----TCTTGTGTAGGCGGGGAT--  
-CCTGTATTT---  
TCGGAATCCTTATGTAAGGAATTACACACGAAATTCCTTCAACAAAGATGTGAATTAGGAAGGATTGGTCGACAAAATAT  
GAATCGGAGGCTTAATCTTGATATACCTCAGCACAATACATTTTTGTTACCGCGAGATATATTAGCAGCTGCGGATCATT  
TGATTGGAATGAAATTCGGAATGGGTACACTTGACGAT-----  
ACGAATCATTGAAAAATAACGTATTCGTTCTGTAGCCGATCTCTTACAAGATCAATTCGGATTGGCTCTGGTTCGTTT  
AGAAAGTGTGGTTAGACGAACTATATGTGGAGCAATTAGACATAAATTGATACCGACTCT-----  
CATAATTTGGTAACTTCAACTCCA-----  
TTAACAACCACTTATGAATCTTTTTTCGGATTACACCCATTATCTCAAGTTTTGGATCGAACGAATCCATTGACACAAAT  
AGTTCATGGGAGAAAAATTGAGTTATTTGGGCCCTGGAGGATTAACAGCGCGAAGCTGCTAGTTTTTCGGATGCGAGATATTC  
ACCCAGTTACTATGGACGTATTTGCCAATTTGACACGTCTGAAGGAATCAATGTTGGACTTATTGGATCCTTAGCAATT  
CATGCGAGAATTGGTCGG---GGTGGTCTCTAGAAAGCCCATTTTATGAA-----ATCTCT---GAGAGATCAAAC--  
-----AAAGGACGAATGCTGTATTTCTACCAAGTCGA-----GATGAATACTAT-----  
ATGGTAGCGGCGGAAATTCCTTGGCGCTGAATCGGGGT---ATTCAAGAAGAACAGGTTGTTCCA---  
GCTCGATACCGTCAAGAATTCCTGACTCTTGCATGGGACCAGGTTTCATCTTCGAAGTATTTTTCTTTTTCAATATTTTTCT  
TATTGGAGCTTCGCTCATTCTTTTTATCGAACATAATGATGCGAATCGAGCTTTAATGAGTTCGAATATGCAACGTCAAG  
CAGTTCCTACTTTCTCAGTCCGAGAGGTGCATTGTTGGAAGTGGGTTGGAACGCCAAGCGTCTCTAGATTCCGGGGTTACC  
GCTATAGCCGAACGCGAGGGAAAGATCATTATACCAATAGCGATAAGATCATTATTCGGGCAGTGGA---GAT-----  
-----ACT-----  
CTAAGCATTCCATTGGTTATGTATCAACGTTCCAACAAAAATACTTGGATGCATCAAAAACCCAGGTTCCGCGGGGT--  
----  
AAATGCATTAATAAAGGACAAATTTTAGCGGACGGTGC GGCTACAGTTGGTGGCGAACTCGCTTTAGGTAATAAACGTCTT  
AGTAGCTTATATGCCGTGGGAAGGTTACAATTTGAAGATGCGGTACTCATTAGCGAGCGTCTGGTATATGAAGATATTT  
ATACTTCGTTTTACATACGGAAATATGAAATGCAGACTCATGTACCAAGCCAAGGT---CCC---  
GAAAGGATCACTAATGAAATACCGCATCTAGAAGCCCATTACTCCGCAATTTAGACAAAAATGGAATTGTGATGATGGG  
ATCTTGGGTGAAGACGGGCGAGATTTTAGTAGGTAAATTAACGCCTCAGATGGCGGAAGAAGAGTCGTGATGCCCCAG  
AGGAGAGATTATTACGAGCCATACTTGGCATTAGATATCCACTTCAAAGGAGACTTGCCTAAAACCTACCGATAGGTGGT  
AGGGGTGAGATTATTGATGTGAGATGGATCCAGAAA---AGGGGGGTTCTAGTTATAATCCAGAAACTATT---  
CGTGATATATTTTACAGAAACGCGAAATCAAAGTAGGGGATAAGGTAGCCGGAAGACATGGAATAAAGGTATCATTTC  
CAAAATTTTACCTAGACAAGATATGCCTTATTTGCAAGATGGAAGGCCTGTTGATATGGTCTTCAATCCATTAGGAGTCC  
CCTCCGAATGAATGTAGGACAGATATTTGAATGCTCGCTCGGATTTCGCGGGGGATCTGCTAGAGAGACATTATCGAATA  
GCACCTTTTGATGAGAGATATGAGCAAGAGGCCTCAAGAAAACCTCGTGTCTTCTGAATTATACGAAGCCAGTAAGCAAAC  
AGCCAAT---  
CCATGGGTATTTGAACCTGAGTATCCGGGAAAAAGCAGACTATTTGATGGAAGAACGGGGGATCCCTTTGAACAACCTGT  
TATAATAGGAAAGCCTTATATCTTGAATTAATTCATCAAGTTGATGATAAAAATACACGGACGTTCCAGTGGACATTATG  
CACGTGTTACACAACAACCCCTTAGAGGACGGGCCAAACAGGGGGGTGAGCGGGTAGGAGAAATGGAGGTTTGGGCTCTC  
GAGGGGTTTGGTGTGCTCATCTTTTACAAGAGATGCTTACTTATAAATCGGATCATATTAGAGCTCGTCAAGGAGTCTC  
TGGTACTACGATCCTTGGAGGAACAATACCTAAACCCGAG-----  
GATGCTCCAGAATCTTTTCGACTGCTCGTTTCGAGAATACGATCTTTGGCTCTGGAAGTGAATCATTTCCTTGTATCT--  
----GAAAAGAAGTTC-----CAGATTAAT-----AGGAAGGAAGCT-----  
ATGATCGATCGGTAT-----  
AAACATCAACAACCTCCGAATTGGATCAGTTTCTCCTCAACAAATAAGTACTTGGGCCAATAAAAATTCTCCCTAATGGAGA  
AATAGTCCGAGAGGTGACAAAACCTTACTTTTTATTAC-----  
AAAACCAATAAACCAGGAAAGGGATGGATTATTTGTGAAAGAATTTTTGGTCTATAAAAAGTGAATTTGTGCTTGTGG  
AACTTAT-----CGAGTAATCGGAGATAAAAAAGAA---  
GACCCGAATTTTGTGAACAATGCGGAGTCGAATTTGTTGATTCTCGGATACGAAGATATCAAATGGGATACATCAAAC  
GGCATGCCAGCAACCCATGTGTGGTATTTGAAACGCCTTCCTAGTTATATCGCGAATCTTTTAGATAAACCTCTTAAAG  
AATTAGAAGGCAAAGTATACTGCGAT-----  
TTTTCTTTTGGCAGGCCCGTAGCTAAAAAACCAACT---TTCTTACGATTACGAGGG---TTATTGCAATAT-----  
-GAAATCCAATCCTGGAAATACAGCATCCCGCTTTTTTTTACTACT-----  
CAAGGCTTCGATACATTTAGAAATCGAGAAATTTCTACCGGAGCGGGTGCTATCCGCGAACAATTAGCCGGTCTCGATTT  
GCGAGTTATTATAGATTATTCGTTGGTAGAGTGAAGGAATTAGGGGAA-----  
GAAAGG-----TCGACG-----GGT-----AATGAA-----TGGGAAGATCGCAAATTTGGA-----  
----  
CGAAGAAAGCAGTTTTTGGTTAGACGCGTGAATTAGCTAAGCATTTTTATTGCAACAAATATAGAACCAGAATGGATGGT  
TTTATGTCTCT

Oryza

CTTTTTCTAGAAATATGGACCAATGGAAGTTTAACCCCTAAGGAAGCGCTTTATGAGGCTTCTCGTAATTTGATTGATTT  
ATTTCTTCTTTTCTTACACGGAGGAA-----GAGGGTACTCGT-----TTCCAAGAAAATAAA---  
AACAGGTTTACTTCCCCCTTTTAAGCTTTCAAAAAAGA-----TTAACT-----AATCTAAAG-----  
AAAAACAAAAAAGAATTCCATTGAATTGTATTTTTATTGATCAATTAGAAGTGCCTTCTAGAACGTATAATTGTCTCAA  
AAGGGCCAATATCCATACACTATTGGACCTTTTGGTAAGACCGGAAGAAGATCTGATGAGAATTGACAGTTTTCTGTATGC  
AAGATGGAAAACAGATATGGGACACTCTA-----GAGAAGCATCTCCCA---ATGGAT-----  
-----  
-----ATGCTCCGGAAT---GGA---  
AATGAGGGAATGTCCACAATACCCGGATTTAGTCAGATCCAATTCGAGGGATTTTGTAGGTTTCAATTAATCAAGGCTTGGC  
AGAAGAAGTTGAGAAGTTTCCAACAATTTAA-----  
GATCCAGATCACGAAATTTCAATTTCAATTTTGGCAAAGGATATCAATTGCTAGAACCTTCGATAAAAAGAAAGGGATGC  
TGTGTATGAATCACTC---ACCTATTCTTCCGAATTATACGTATCCGCGCGATTAATTTTT-----  
GGTTTCGATGTGCAAAAGCAAACCTTTCTATTGGAAACATTCCCTATAATGAATTCCTTAGGAACCTTTATAATAAATGG  
AATATACCGAATTGTGATCAATCAAATATTGCTAAGTCTGGTATTTACTACCGCTCGGAATTAGACCAT---AAAGGA-  
--ATTTCT---  
ATCTACACCGGGACTATAATATCAGATTGGGGAGGAAGATCGGAATTAGCAATTGATAAAAAAGAAAGGATATGGGCTCG  
CGTGAGTAGAAAACAAAAGATATCTATTCTAGTTCTATCATCAGCTATGGGTTCAAATCTAAAAGAAATTTCTAGATAATG  
TTTCTACCTGAAATTTTTCTTGTCTTTCCCTAATGCTAAGGAG-----  
AAGAAGAGGATTGAGTCAAAAGAAAAGCTATTTTGGAGTTTTATCAACAATTT-----GCTTGTGTAGGTGGGGAC--  
-CTGGTATTT---  
TCGGAATCCTTATGTGAGGAATTACAAAAGAAATTTTTCAACAAAATGTGAATTAGGAAGGATTGGTCGACGAAATAT  
GAATCGAAGACTGAATCTTGATATACCTCAGAACAGCACCTTCTTGTACCAGGAGATGATTGGCCGCTACGGATCATT  
TGATTGGAATGAAATTTGAAACGGGTATACTTGACGATGACGATATGAATCACTTGAAAAATAAACGTATTCGTTTCGGTT  
GCGGATCTGTTACAAGATCAATTCGGACTGGCTCTTGGTCGTTTACAACATGCGGTTCAAAAACTATCCGTAGAGTATT  
CATACGTCAATCAAAACCGACTCCA-----  
CAAATTTGGTAACTCCAATTTCAACCTCGATTTTATTAATAACTACTTACGAGACCTTCTTTGGTACATATCCCTTATC  
TCAAGTTTTTGATCAAACCAATCCATTTGACACAAACGGTTTCATGGGCGAAAAGTGAGTTGTTTGGGTCTGGAGGATTGA  
CGGGGAGAAGTCAAGTTTTTCGGAGCCGAGATATCCATCCGAGTCACTATGGGCGTATTTGTCCAATTGACACGTCCGAA  
GGAATCAACGTTGGACTTACTGGATCTTTAGCTATTCATGCGAGAATTGATCATTGGTGGGGATCCGTAGAGAGTCTTTT  
TTATGAA-----ATATCT---GAGAAAGCAAAAGAAAAAAGAGAGACAGGTGGTTTTATTTATCACCAAATAGA----  
--GATGAGTATTAT-----ATGATAGCAGCAGGAAATTTCTTTGTCTTGAATCGGGGT---  
ATTCAGGAAGAACAGGTTGTTCCA---  
GCTAGATACCGTCAAGAATTCCTGACTATTGCATGGGAACAGATTTCATGTTAGAAGTATTTTTCTTTCCAATATTTTTCT  
TATTGGGGGTTCTCTCATTCTTTTATTGAGCATAATGATGCGAATCGAGCTTTAATGAGTTCTAATATGCAGCGCCAAG  
CAGTTCCGCTTTCTCGGTCCGAGAAGTGCATTGTTGGAAGTGGATTGGAACGCCAAACAGCTCTAGATTCGAGGGTTTCT  
GTTATAGCCGAACGCGAGGGAAAGATCATTCTACTAATAGTCACAAGATCCTTTTATCAAGTAGTGGG---AAG-----  
-----ACT-----  
ATAAGTATTCCTTTAGTTACCCATCGGCGCTCTAACAAAATACTTGTATGCACCAAAAACCTCGGGTTCGCGGGGT--  
-----  
AAATCCATTAAAAAAGGACAAATTTTAGCGGAGGGGGCTGCTACGGTTGGTGGGGAACCTTGCTTTAGGAAAAACGTATT  
AGTAGCTTATATGCCATGGGAAGGTTACAATTTTGAAGACGCAGTATTAATTAGCGAACGTTTGGTATATGAGGATATTT  
ATACTTCTTTTACATCCGAAAATATGAAATTCAGACGGATACAACAAGCCAAGGCTCCGCT---  
GAAAAAATCACTAAAGAAATACCACATCTAGAAGAACATTTACTCCGCAATTTGGACAGAAATGGAGTTGTGAAGTTGGG  
GTCCTGGGTAGAAACAGGCGATATTTTAGTAGGTAAATTAACGCCTCAGATAGCGAGCGAA---  
TCGTCCTATATCGCGGAAGCTGGATTATTACGGGCCATATTTGGTCTTGAGGTATCCACTTCAAAAGAACTTCTCTCAA  
ACTACCGATAGGTGGAAGAGGACGCGTTATCGATGTGAAATGGATCCAGAGG---GAGGGGATC-----  
GACATAATGGTTTCGTGTATATATTTTACAAAAACGCGAAATCAAAGTTGGGGATAAAGTAGCCGGAAGACACGGGAATAA  
GGGGATCATTTCAAAATTTTGCCTAGGCAAGATATGCCCTATTTGCAAGATGGAACGCCTGTTGATATGGTTTTCAATC  
CCTTAGGAGTACCCTCCCGAATGAATGTGGGACAAATATTTGAAAGCTCGCTCGGATTAGCAGGGGATCTGCTAAAGAAA  
CATTATAGAATAGCACCTTTGATGAGAGATATGAGCAAGAGGCTTCAAGAAAACCTTGTGTTTTTCAAGATTATATGAAGC  
CAGTAAACAAACAAAAAAT---  
CCGTGGGTATTTGAACCCGAGTACCCGGGAAAAAGCAGAATATTTGATGGAAGAACAGGAGACCCCTTCGAACAGCCTGT  
TCTAATAGGGAAGTCTATATCTTAAAATTAATTCATCAAGTTGATGAGAAAATCCACGGACGCTCTACTGGGCCCTATT  
CACTTGTACACAACAACCCGTTAGAGGAAGAGCCAAGCAAGGGGGACAACGAATAGGAGAAATGGAAGTTTGGGCTTTA  
GAAGGATTTGGTGTGCTCATATTTTACAAGAGATACTTACTTATAAATCTGATCATCTTATAGCTCGCCAAGAAATACT  
TAACGCTACGATCTGGGGAAAACGAGTACCTAATCACGAG-----



GATCCTCCAGAATCTTTTCGAGTGTCTTTTCGAGAAGTACGATCTTTGGCTCTAGAAGTGAACCATTTCTTGTATCT--  
----CAGAAGAAGTTC-----CAGGTTAAT-----AGGGAAGAAGTT-----  
ATGATTGACCAATAT-----  
AAACATCAACAACCTTCAAATTTGGACTCGTTTTCCCTCAACAAATAAAGGCTTGGGCTAACAAAACACTACCTAATGGGGA  
AGTCGTTGGCGAAGTCACAAGGCCCTCCACTTTTCATTAT-----  
AAAACCGATAAACAGAAAAAGATGGATTGTTTTGCGAAAGAATCTTTGGACCCATAAAAAGCAGAATTTGTGCTTGTGG  
AAATTCT-----CGAGCGAGCGGAGCTGAAAACGAA----  
GACGAAAGATTTTGCCAAAAATGCGGAGTAGAATTTGTTGATTCTCGGATACGAAGATATCAAATGGGATACATCAAAC  
CGCATGTCCCGTGACTCATGTGTGGTATTTAAAAGGTCTTCTAGTTATATCGCGAATCTTTTAGATAAACCCCTTAAGA  
AATTGGAGGGCCTAGTATATGGCGAT-----  
TTCTCTTTTGTAGGCCAGTGTCTAAAAACCAACT---TTCTTACGATTACGAGGT---TTATTCGAGGAT-----  
-GAAATTTTCATCTGTAAACCATAGCATTTCCTTTCTTACC-----  
CCAGGCTTTACAACATTTTCGAAATCGGAAATTCGACAGGAGCAGGTGCTATTAGAGAACAATTAGCAGATTTGGATTT  
GCGAATTATTTTAGAGAATTCCTCGGTGGAATGGAAGGAATTAGAAGC-----  
GAGGGG-----TATAGT-----GGA-----GATGAA-----TGGGAAGATAGAAAAAGACGA-----  
----

ATAAGAAAAGTTTTTTTTGATTAGACGCATGCAATTGGCGAAACATTTTATTCAAACAAATGTAGAACCAGAATGGATGGT  
TTTGTGCTTATT

Panax

CTCTTTCTTGAAATATGGACAAATGGAAGTTAACTCCTAAAGAAGCACTTCATCAAGCCTCCCGGAATTTGATTGATTT  
ATTTATTCCTTTTACATACAGAAGAA-----GAAACTTACAT-----TTAGCGGACAATCAA---  
CACACGGTTCCTTTACCCCTTTTACTTTTCATGAGAAA-----TTGACT-----AAACTAAGA-----  
AAAAACAAAAAAAATAGCATTGAAATCGATTTTTATTGACCAATCAGAAGTGCCTCCAGGATCTATAATTGCCTTAT  
AAGGTCCAATATATATACATTATTGGACCTTTTGAATAACAGTCAAGAAGACCTTATGAAAATTGAACATTTTCGCATAG  
AAGATGTAAAAGCGATATTGGGCATTCTA-----GAAAAGCATTTCGCA---  
ATTGATTTACCGAAAAAGCTGAAAATAGGTTTTGAATCTTTA-----

-----ATGCTCCGAGAT---  
GGAAAAAATGAGGGAATGTCTACAATACCTGGGTTAATCAGATACAATTTGAAGGATTTGTAGGTTTATTGATCAGGG  
CTTGACGGAAGAAGCTTTATAAGTTTTCAAAAATTGAA-----  
GATACCGACCAAGAAATTTGAATTTCAATTATTTGTGGAAACATATCAATTAGTAGAACCGTTGATAAAAAGAAAGAGATGC  
TGTGTATGAATCACTC---ACATATTCTTCTGAATTATATGTCTCCGCGGGACTCATTGTGAAAAGT-----  
GGTAGGGATATGCAAGAACAAACTATTTTTTTTTGGAAACATTCCTCTAATGAATTCTCTGGGAACTTCTATAGTAAATGG  
AATATATAGAATTGTGATCAATCAAGTATTGCAAAGCCCCGGTATTTATTACCGGTCAGAATTGGACCAT---AACGGA-  
--ATTTCG---

GTGTATACCGGCACCATAATATCAGATTGGGGAGGAAGATCAGAATTAGAGATTGATAGAAAAGCAAGGATATGGGCTCG  
TGTGAGTAGGAAACAAAAAATATCTATTCTAGTTTTATCATCAGCTATGGGTTGGAATCTAAGAGAAATTTCTAGAGAATG  
TTTGTATCCTGAAATATTTTTGTCTTTTCTGACTGATAAGGAG-----  
AAAAAAAATCGGGTCAAAGAAAATGCCATTTTGGAGTTTACCAACAATTT-----GCTTGTGTAGGCGGGGAT--  
-CCGGTATTT---

TCTGAATCCTTATGTAAGGAATTACAAAAGAAATCTTTCAACAAAGATGTGAATTAGGAAGGATTGGTCGACGAAATAT  
GAATCGGAGACTGAACCTTGATATATCCCAGAACAATACATTTTTGTTACCGCGAGATATATTGGCAGCCGCGGATCATT  
TGATTGGAATGAAATTTGGAATGGGTACACTTGACGAT-----  
ATGAATCATTGAAAAATAACGTATTCGTTCTGTAGCAGATCTTTTACAAGATCAATTCGGATTGGCTCTGGTTCGTTT  
AGAAAATGTGGTTCGAGGAAGTATATGTGGAGCACTTAGGCATAAATTGATACCGACTCCT-----

CAGAATTTGGTAACCTTCAACTCCA-----  
TTAACAACACTTATGAATCTTTTTTCGGTTTACACCCATTATCTCAAGTTTTGGATCGAACTAATCCATTGACACAAAT  
AGTTCATGGGAGAAAATTTGAGTTATTTGGGCCCTGGAGGATTGACAGGGCGAACTGCTAGTTTTCGAATACGAGATATCC  
ATCCTAGTCACTATGGGCGTATTTGCCAATTGACACGTCTGAAGGAATAAATGTCGGACTTATTGGATCTTTAGCAATT  
CATGCGAGGATTGGTCGT---TGGGATCTCTAGAAAAGCCCGTTTTATGAA-----ATTCT---GAGAGATCAAAA--  
-----GGGGCACGGATGCTTTATTTATCACCAGGTAAA-----GATGAATACTAT-----

ATGGTAGCGGCGGAAATCTTTGGCCTTGAATCAGGGT---ATTCAGGAAGAAGCAGGTTGTTCCA---  
GCTCGATACCGTCAAGAATTCCTGACTATTGCGTGGGAACAGGTTTCATCTTCGAAGTATTTTTTCTTCCAATATTTTTCT  
TATTGGAGCTTCCCTCATTCTTTTATCGAGCATAATGATGCGAATCGGGCTTTAATGAGTTCGAATATGCAACGTCAAG  
CAGTTCCTCTTTCTCGGTCCGAGAAGTGCATTGTTGGAAGTGGGTTAGAACGCCAAGCGGCTATAGATTAGGGGGCTCTT  
GCTATAGCGGAACACGAGGGAAAGATCATTATACCGATACTGACAAGATCCTTTTATCAGGTAATGGA---AAT-----  
-----ACT-----

CTAAGCATTCCATTAGTTATATATCAACGCTCCAACAAAATACTTGTATGCATCAAAAACCCAGGTTTCAGCGGGGT--

----

AAATGCATAAAAAAGGGACAAATTTTAGCCCATGGCGCCGCTACAGTTGGTGGCGAACTCGCTTTGGGGAAAAACGTATT  
AGTAGCTTATATGCCATGGGAAGGTTACAATTTTGAAGATGCAGTACTCATTAGCGAGCGCTTGGTATATGAAGATATTT  
ATACTTCTTTTTACATACGAAAATATGAAATTAAGACTCATGTGACAAGCCAAGGC---CCC---  
GAAAGGGTCACTAATGAAATACCGCATTTAGAAGCCCATTACTCCGCAATTTAGACAAAAACGGAATTGTAATGCTGGG  
ATCTTGGGTAGAGACGGGTGATATTTTAGTAGGTAAATTAACGCCCAATGGTGAAAGAA---  
TCGTCGTATGCCCCGGAAGATAGATTGTTACGAGCCATACTGGCATTGAGGTATCTACTTCAAAGAACTTGTCTAAA  
ACTACCTATAGGTGGTAGGGGTCGGGTTATTGATGTGAGATGGATCCAGAAA---

AGGGGAGGTTCTAGTTATAACCCAGAAATGATT---  
CGTGTATATATTTACAGAAACGCGAAATTAAGGTAGGCGATAAAGTAGCTGGAAGGCATGGAATAAGGGTATCATTTC  
AAAAATTTTGCCTAGACAAGATATGCCTTATTTGCAAGATGGAAGACCTGTTGATATGGTCTTCAACCCATTAGGAGTAC  
CTCCACGAATGAATGTAGGGCAGATATTTGAATGTTCACTCGGGTTAGCGGGGGGTCTGCTAGACAGACATTATCGAATA  
GCGCCTTTTGTAGAGATATGAACAAGAAGCTTCGAGAAAACCTAGTGTCTTCTGAATTATATGAAGCCGGTAAGCAAAC  
AGCGAAT---

CCATGGGTATTTGAACCCGAGTATCCGGGAAAAAGTAGAATATTTGATGGAAGAACGGGGGATCCTTTTGAACAACCTGT  
TATAATAGGAAAGCCTTATATCTTGAATTAATTCATCAAGTTGATGATAAAATCCATGGACGTTCCAGCGGACATTATG  
CACTTGTACACAACAACCCCTTAGAGGAAGGGCCAAGCAAGGTGGACAACGGGTAGGAGAGATGGAGGTTTGGGCTCTA  
GAGGGATTTGGTGTGCTCATATTTGCAAGAGATGCTTACTTATAAATCGGATCATATTAGAGCTCGCCAGGAAGTACT  
TGGTACTACGATCATTGGAGGAACAATACCTAATCCTCAG-----

GATGCTCCAGAATCTTTTCGATTGCTCGTTCGAGAACTACGATCTTTGGCTCTGGAAGTGAATCATTCTTTGTATCT--  
----GAGAAGAATTC-----CAGATTAAT-----AGGAAGGAAGCT-----

ATGAATCAGAATTTTTCTTCTATGATCGATCGGTAT-----  
AAACATCAACAACCTCCGAATTGGATCAGTTTCTCCTCAACAAATAAGTACTTGGGCCAATAAAATCCTGCCCAATGGAGA  
GATAGTTGGAGAGGTGACAAAACCTTATACTTTTCATTAC-----

AAAACCAATAAACCGGAAAAAGATGGATTATTTGTGAAAGAATTTTTGGGCCTATCAAAGCGGAATTTGTGCTTGTGG  
AAATTAT-----CGAGTAATCGGGAATGAAAAAGAA---

GACCCGAAATTTGTGAACAATGCGGAGTCGAATTTGTTGATTCTCGGATACGAAGATATCAAATGGGCTACATCAAAC  
CGCATGCCAGTAAACCCATGTGTGGTATTTGAAACGTCTTCTAGTTATATTGCGAATCTTTTAGATAAACCTCTTAAAG  
AATTAGAAGGCCTAGTATACTGCGAT-----

TTTTCTTTTGCAGGCCCCACTAGCTAAAAAACCTACT---TTCTTACGATTACGAGGT---TCGTTCGAATAT-----  
-GAAATCCAATCCTGGAAATACAGCATCCCGCTTTTTTTTTACTACC-----

CAAGGCTTCGATACATTTGAAATCGAGAAATTTCTACTGGAGCAGGTGCTATCCGAGAACAATTAGCCGATCTCGATT  
ACGATTATTATAGATTCTTTCGTTGGTAGAATGGAAGAGTTGGGGGAA-----  
GACGGG-----CCTACA-----GGG-----AATGAA-----TGGGAAGATCGAAAGGTTGGA-----

----

AGACGAAAGGATTTTTTGGTTAGACGTATGGAATTAGCTAAGCATTTTATTTCGAACAAATATAGAACCAGAATGGATGGT  
TTTGTGTCTATT

Pelargonium -----  
-----  
-----  
-----  
-----

-----ATGCTTGGCGAT---AGA---

AATGAAGGAATGGCTACAATCCCTGCGCTTAATCAGATACAATTTGAAGGATTTTGTAGGTTCTTGATCAGGGCTTAAT  
AGAAGAACTTTCTCAGTTTCCAAAG-----

GGGAACAGTTTTCTAGAATATTTTAGAGACGAAGAGATAGACTTTCAATTATTTTCGAAAACATATCACTTGGTAAAACC  
GTTGATAAAAAGAACGAGATGCTAGATATGAATCACTC---

ACCTATTCTTCTAAATTATATGTATCCGCGGGATTCTTTGGAAAGAC-----AAAAGG---  
CCGCAAAAAAGACCATTTGTATTGGAAACCTTCTTTAATGAATCCGTGGGAACCTTTTATAGTAAATGGAATATCCAG  
AGTGGTGATCAATCAAATATTGCAAAGTCCGGGTATCTATTACGGATCAGAATTGGACTAT---CAGGGA---TTTACG-

---

GTCTATATCGCCACCATAATATCAGATTGGGGAGGAAGATTAAAAATTAGAGATTGATAAAAAAGAACGTATATGGGCTCG  
CGTGAGTAGGAAACAGAAAATATCTATTCTAGTTCTATCATCGGCTATGGGTTTCAATCTAAAAGAAATTTCTAGAGAATG  
CTTGCTACCCTGAAATTTTTCTGGCTTTAAATTTAAAGAAGGAGTGTGGGTTTCAAGAAAAAAAATA-----

--TGCGATTTTGAATTGTATGCAAAATATAAAGATTTCACTGAATATAAAGATTCATTAGATTTT-----

GATTTCTTATGTGAGACATTACGAAAAACATTCTTTAGCCACAAGTGTGAATTAGGAAGGGTTGGTCGACAAAATATTAA  
CCGAAGATTGAATCTTGATATATCCCATAAAAACACGTTTTTGTACCCCAAGATATATTGGCAGCCACCAATCATTGGA  
TTGGAATGAAATTTGGAATGGGTACTTTGACGAT-----  
ATGAATCATTGAAAAATAAACCGGATTCGTTCTGTAGCGGATCTCTTACAAGATCAATTCGGATTGGCTCTAAATCGTTT  
AGAAGACGCGGTTTTGCGATACAATAGGAAGAGCAATAGCAAAGGACAAAATACCTACCCTT-----  
CGGCATTTGGCAACTTCAACTCCA-----  
TTAACAACCCTTATGAATCTTTTTTCAAATTACACCCATTATCTCACGTTTTTCGATGAAACGAATCCATTGACACACAT  
AGTTCATGGGAGAAAAATGGAGTTTTTTGGGTCTGGGGGATTGACAGAAAGAACTGCAAGGTTTTCGAGTACGAGATATTC  
ATCCTAGTAACATGGACGCATTTGCCCAATTGACACATCTGAAGGAATCAAAGTTGGCCTTATCGGATATTTAGCAACT  
CATGCGAGAATCGGTGAT---TGTGGGTCTCTAGAAAGTCCATTTTACGAA-----ATGTCC---GAGAAATCAAAA--  
-----AGGGTCCGGATGCTTTTCTTATCATCAAGGAAA-----GAGGAATACTAT-----  
ATGATCGGGACAGGGAATCTTTGGCACTGAATCAAGGT---ATTGAGGAAGAACAGATTATTCCG---  
GCTCGATACCGTCAAGAATTCCTGACTATTGCATGGGAAGAGGTTCATTTTCGAAGTGTTTTTCTTTTTCAATACTTTTT  
TATTGGAGTTTTCTCTAATTCCTTTTTCTCGAGCATAATGACGCGACTCGGGCTTTAATGAGTTCAAATATGCAACGACAAG  
CAGTTCGCTTTCTAGGTCCGAGAAGTGCATTGTTGGAAGTGGGTTGCAAGGCCAAGTGGCTCTAGACTCCGGGATTCCC  
CTTATAACTGAACACGCGGGAAAGATCATTCTACCATACTGACAAGATCCTTTTATCGGTCAATGGG---GAG-----  
-----ACT-----  
CTAAGCAGTCCATTAGTTTTGTTTTCAACGTTCCAACAAAAATACTTGGATACATCAAACCCCCAGGTTTTCGCGGGGT--  
-----  
AACTGCACTAAAAAGGGACAAATTTTAGCGGACGGTGCCGCTACGGTTGGGGGAGAAGTTCGCTTTGGGGAAAAACGTATT  
AGTAGGTTATATGCCATGGGAAGGTTACAATTTGAAGATGCGGTACTTATTAGTGAGCGTCTGGTCTATGAAGATATTT  
ATACTTCTTTTACATACGTAAATGTGAAATTAAGATTTTTATGACAATGAAAGGT---CCC---  
GAAAAGATCACTAACCAATACCGCATATAGACCCCATTTACTACGAAATTTAGACAAAAACGGAGTTGTAATCTTGGG  
ATCTTGGGTAGAAGCGGGCGATATTTTAGTAGGTAATTAACACCTGAGCTGGTTGAATTA---TCT-----  
CCGGAAAAAAGGTTAATAGAAGCCTTGTTGACGCTCCTATAGGCACTACAAGACAAAGTTGTCTAAAAGTGCCTATATG  
GGGGAGGGGCCGAGTTATTGATGTGAGATGGATCCATAAA---GGGAGCGCGTCCCGTTCTAATCCAGAAAGGATT---  
CGTGTATATATTTTACAGAAACGTAAAATCAAAGTAGGCGATAAAGTCGCCGGAAGACATGGAAATAAAGGGATCGTTTC  
CAAAATTTTGCCTATACAGGATATGCCTTATTTGCAAGACGGAAGGCCTCTTGATATGGTCTTCAACCCATTAGGAGTAC  
CTTCGCGAATGAATGTAGGACAGATCTTTGAATGCTCGCTCGGGTTGGCGGGAGGTCTTCTAGATAGACATTATCGAATA  
GCACCTTTTGATGAGAGATATGAAGAAGAGGCTTCGAGAAAAGTCTTTTCTGAATTATATGAAGCCAGTAAGCAAAC  
GGGGAAT---  
CCTTGGGTATTTGAACCCGAGTATCCGGGAAAAAGCATAATATTTGATGGAAGAACGGGAGATCCCTTTGAACAACCTGT  
TATAGTGGGACAGTCTTATATCTTGAAATTGATTCATCAAGTTGATGATAAAAATACATGGGCGTTCCTACTGGTCTTATT  
CACGTGTTACACAACAACCCGTTAAGGGAAGGGCCCGCGGGGGGGTTCAGCGAGTAGGAGAAATGGAGGTTTGGGCTCTA  
CAGGGATTGGGGGTTGCTCATATTTTGAAGAGATACTTACTTATAAGTCTGATCATCTTACAACCTCGCAACCAAATATT  
TGGTACTCTACTGCTTGGAGGAGCGCTACCGAAACCTGAACCTGAGGATCGTCCAGAATCCTTTTCGGTTGCTTGTTCGAG  
AACTACGATCTTTGTCCCTAGAAGTGAATTTTCTTGTATCTAAGAATAAGAAGAACTTCAACTTCTGGAAGATGAAT  
-----AGGGTGAAGTTTTAA-----  
ATGATCGATAAGTATCAAGAACCTAAACACCACCAACTTCGAATTGGGTTAGTTTTCTCTCAACAAATAATGGCTTGGGC  
CAATAAAACCCTGCCACTGGAGAGATAGTCGGAGAGGTGAAGAAGTATCGAATTTTTCTTATGATAGAGATTCTGAAA  
CATATAAGCCAGAAAGGGATGGTTTTGTTTTGTGAAAGAATTTTTGGACCTATAAAAAGCGGAGTTTGTGCTTGTGGAGAG  
TCT-----CGTAAAATCGGAGATGAAAAAGAA---  
AAGAGAACATTTTGCGAAAAATGCGGAGTCGAGTTTGTGATTCTCGGATACGAAGATATCAAATGGGCTACATCAAAC  
GGCATCCCCATGGCCCATGTGTGGTATTTGAAGCGTATTCCTAGTTATATCGCCAATCTTTTAGATGAAAAGATTAAG  
ACTTAGAAAACCTAGTATACCGCGAT-----  
TTCATTTTTGCTGGGCCTCTAACTAAAAAACCCACT---TTATTACGATTACGAGGG---  
TCCTTCCCGAATCTAAAACCAAATTCCTCGGGATCGAGAGATATCCTCTCCAATTTTTGAAGACC-----  
-----  
AAAAGCTTCCAAAAATTGCGAGATCGTGAATTTTTCTGCTGGAGCAGGCGCTATCCGAAAACGATTGGCCAATCTAGATTT  
GGAAGTTATTATATATTCTTCGTTAGCAGAATGGAAAAACGCAAGGAGCAGAAAGCGGAGATAGAG-----  
ATAAAG-----CCCACG-----CGT-----  
ACTGAACGTACTGAAGAAGAAGATCGGAAAATTGAAAAAATTAAGAAGAATGCGCGTTTTGGTTAGACGCATGGAATT  
AGCTAAGCATTCTTGAACAATGTAAAACCTGAATGGATGATTTTACGTCTATT  
Phalaenopsis  
CTCTTTATAGAAATATGGACGAATGGAAGTTAACTCCTAAAGAAGCACTTTATGAAGCTTCTCGTAATTTGATTGATTT  
ATTGATTCCTTTTCTACATGCAGAGGAA-----GAGGACATGAAT-----TTTAAGGAAAATGAA---  
AACAGGTGGAATCTACCCCCCTTTTCTTTCAAGACAAA-----TTTACT-----AATTTCAAG-----

AAAAACAAAAAAGGAATTCCATTGACATGTATTTTTATTGACCAATCAGAATTGTCTTCCAGGACCTATAATTGTCTCAA  
AAGATCCAATATACATACATTATTGGACCTTTTGGAGTCACAGTCAAGAAGATCTTATGAAAATGGAATATTTTTCGCACAG  
AAGATGTAAAACAGATATTGAGCACTGTA-----CAGAAGCATTTTGCA---ATAAATTTACTTAATAAA---  
AAGTTA-----  
ATGAATAGTGAGCCAAAAGCCGATAATGGGATTTTTTCAATAAAGAGGAAACTTCAGATTAAGATGCTCCAGAAT---  
GGA---  
AATGAGGGAATGTCCACAATACCTGGATTTAGTCAGATACAATTTGAGGGATTTTGTAGGTTTATTAAATCAGGGCTTGAC  
GGAAGAATTTTATAAGTTTCAAAAAATTGAA-----  
GATAGAGATCAAGAAATGAAATTTCAATATTTTGTGGAAACATATCAATTTGGTAGAGCCCTTGATAACAGAAAAGAGATGC  
TGTGTATGAATCACTC---ACATATTTCTTCTGAATTATATGTACCCGCGGTCTTAATTTGGAAAACC-----  
GGTAGAAAATATGCAAGAACAACCGTTTTTATTGGAAACATCCCTATAATGAATTTCTTTTGGAACTCTATAGTAAATGG  
AATATACCGAATTGTGATCAACCAAATAGTGCAAAGTCCCGGTATTTACTATCGTTTCAAGAAATTTGGAACAT---AACGGA-  
--GTTTCT---  
GTCTATACCAGTACTATAATATCGGATTGGGGGGGAAGGTCGGAATTAGAAAATTGATAGAAAAGCAAGGATATGGGCCCG  
TGTAAGTAGAAAACAAAAATATCTATTCTAGTTCTATCATCAGCTATGGGTTCGAATATAAGAGAAAATTTTAGATAATG  
TTTGTACCCTGAGATTTTCTTGTCTTTCCCGAATGATAAAGAG-----  
AAAAAAAAGATTGGGTCAAAGAAAATGCTATTTTTGGAGTTTTATCAACAATTT-----GCCTGTGTAGGGGGGGAT--  
-CCAGTATTT---  
TCTGAGTCTTTATGCAAGGAATTACAAAAGAAAATTTTTTCAACAAAGATGTGAGTTAGGAAAGATTGGTCGACAAAATCT  
AAACCGGAGACTTAATCTTGATATACCCCAAAAACAATACATTTTTTGTACCACGAGATTTATTGGCTGCTGTGGATCATT  
TGATCGGAATGAAATTTGGGAATGGGTACACTTGACGAT-----  
ATGAGTCACTTGAAAAATAAACGTATTCGTTCTGTAGCAGATCTATTACAGGATCAATTTGGATTAGCTCTTGTTCGTTT  
AGAAAATACGGTTCGAGGAATATATGTGGAGCAATCAGGCATAAATTGATACCGACTCCT-----  
CAAAATTTGGTAACTTCAACTTCA-----  
TTAACAATACTTATGAATCGTTTTTTGGCTTACACCCTTTATCTCAAGTTTTGGATCGAACTAATCCGTTGACACAAAT  
TGTTTCATGGGCGAAAATGGAGTTATTTGGGTCTGGAGGATTGACGGGGCGAACTGCTAGTTTTTGAATACGAGATATCC  
ACCCGAGTCACTATGGACGTATTTGTCCAATTGACACGTCCGAAGGAATCAATGTTGGACTTATGGGATCATTAGCTATT  
CATGTGAAGTTGGTTAT---TGGGGATCTATAGAGAGTCCATTTTTATGGA-----TTATCT---GAGAGATCAAAA--  
-----GAGGCACAGATGGTTTTATTTATCACCAAATAGA-----GATGAATATTAT-----  
ATGGTAGCAGCAGGAATTTCTTTGGCCTTGAATCGGGAT---ATTCAAGAACAACAGGTTGTTCCA---  
GCTCGATATCGTCAAGAATTCCTGACTATTGCATGGGAAGAGATTTCATCTTAGAAGCATTTTTCCCTTCCAATATTTTTTC  
TATTGGAGCTTCCCTCATTCTTTTTATTGAGCATAATGATGCGAATCGAGCTTTAATGAGTTCTAATATGCAGCGCCAAG  
CAGTTCCCTTTCTCGGTCCGAGAAGTGCATTGTTGGAAGTGGGTTGGAAGGACAAACGGCTCTAGATTCGGGGGTTTCA  
GTTATAGCCGAATGCAAGGGAAAATCATTTATACTGATACTCAAAAGATCTTTTTATCAAGTAATGGG---GAT-----  
-----ACT-----  
CTAAGCATTCCATTGGTTATGTATCAACGTTCCAACAAAAATACTTGTATGAATCAAAAAACTCAGGTTCCAGCGGGGT--  
-----  
AAATACATTA AAAAAGGGACAAATTTCTAGCGGGTGGTGC GGCTACAGCTGGTGGGGA ACTCGCTTTAGGAAAAAATGTATT  
AGTAGCTTATATGCCATGGGAAGGTTACAATTTTGAAGACGCAGTACTAATTAGCGAACGTCTGGTTTATAAAGATATTT  
ATACTTCTTTTACATCCGGAAATATGAAATTCAGACTCATGTAACAAGCCAAGGT---CCT---  
GAAAGAATCACTAAGGAGATCCCGCATTTAGAGGCTCGTTTTACTCCGAAATTTAGACAGAAATGGAATTTGTGATGCTGGG  
ATCTTGGATAGAAACAGGTGATATCTTAGTAGGTAAATTAACACCTCAGACAGCGAGTGAA---  
TCCTCATATGCCCCGGAGGATAGATTATTACGAGCTATACTTGGCATTCCAGGTATCCACTTCAAAGAACTTCTCTAAG  
ACTACCTATAGGGGGAAGGGTTCGAGTTATTGATGTGAGATGGATCCATAGA---  
AGAGGGGTTTTCCAATTCTAATCCAGAAAGGATT---  
CGTGTATATATTTACAGAAACGTGAAATCAAAGTAGGTGATAAAGTAGCTGGAAGGCATGGAATAAGGGTATAATTTCT  
TAAGATTTTTGTCTAGACAAGATATGCCCTATTTGCAAGATGGAACGCCCGTTGATATGGTATTCAACCCATTAGGAGTCC  
CCTCACGAATGAATGTGGGACAGATATTTGAATGTTCACTCGGATTAGCGGGGGATCTGCTAAAGAAACATTATAGAATA  
GGACCTTTTGTGAGAGATATGAGCAAGAGGCCTCAAGAAAAGTGTGTTTTCCGAATTATATGAAGCCAGTAAGAAAAC  
AAAAAAT---  
CCATGGGTATTTGAAACCCGAATATCCGGGAAAAAGCAGAATATTTGATGGAAGAACAGGAGATCTTTTTGAAACAACCTGT  
TCTAATAGGAAAGTCTATATCCTAAAATTAATCCATCAAGTTGATGATAAAATCCATGGACGTTCCAGTGGGCATTACG  
CACTTGTACACAACAACCCCTTAGAGGGAGGGCCAAACAAGGGGGACAAAGAGTAGGGGAAATGGAAGTTTGGGCTCTA  
GAGGGATTTGGTGTGCTCATATCTTACAAGAGATGCTTACTTACAAATCTGATCATATTAGAGCTCGTCAAGAAGTACT  
TGGTGTATGATTATTGGGGCAACAGTACCTAACCCAGAG-----  
AGTGCTCCAGAATCTTTTCGATTGCTCGTTCCGAGA ACTACGATCTTTGTCCCTGGA ACTGAATCATTTCCTTGTATCT--  
----GAAAAGAACTTC-----CAGATGGAT-----AGGAAGGAAGCT-----

ATGAATCAGAATTTCTATTCTATGATTGACCAGTAT-----  
AAACATCAACAACCTTCGAATTGGATCAGTTTTCCCTCAACAAATCAGGGCTTGGGCAAAAAAGATTCTACCCAATGGAGA  
GATAGTTGGAGAGGTGACAAAACCTATACTTTTCATTAT-----  
AAAACATAAAACCGGAAAAAGATGGATTGTTTTGTGAAAGAATTTCTGGACCCATAAAAAAGTGAATTTGTGCTTGTGG  
AAATTAC-----CGAGGAATTGGGACTGAAAAAGAA---  
GACCCGAAATTTTGTGAAGAATGCGGGGTGGAATTTGTTGATTCTCGGATACGAAGGTACCAAATGGGATACATCAAAC  
GACATGTCCAGTGACTCATGTGTGGTATTTGAAACGTCTTCTAGTTATATTGCGAATCTTTTAGATAAGCCCCTTAGGG  
AATTAGAGGGCCTAGTATATTGCGAT-----  
TTTTCTTTTGTAGGTCCATAGCTAAAAAACCTACT---TTTTTACGATTACGAGGT---TCATTCGAATAT-----  
-GAAATCCAATCCTGGCAATACAGCATCCCCTCTTTTTTACTACT-----  
CAAGGTTTCGAGACATTTGAAACCGAGAAATCTCTACGGGGCAGGTGCTATCAGAGAACAATTAGCCGATTCCGGATTT  
GCGAATTATTACAGATAATTTCTTTGTTAGAATGGAAGGAATTAGGAGAT-----  
GAAGAG-----TCCGCA-----GGA-----AATGAA-----TGGGAAGAGAAAAAATTCGA-----  
----

AGAAGAAAGGATTTTTTGGTTAGGCGCATAGAATTAGCTAAACATTTTCTTCGAACAAACGTAGATCCAGAATGGATGGT  
TTTGTGCCTATT

Pinus

CTTTTCTGGAAATATGGACGAATGGGGGGTTAACTCCTAGGGAGGCACTTTACGAAGCTTCTCGAAATTTGATCGACTT  
ATTTATTCCTTCCCTGCATGGAGAGGAA-----CAGAACATCGAT-----GGAATGAACAATAAA---  
AAAGGGTCTAATATGCTTCCCTTCCCTTTTCGCACGTA-----TTGACT-----GATACGGGG-----  
GAAACGAAAGAAAAAATAGCATTTCAACTTATTTTTCATTGACCAATTAGAGTTACCCCCAAAACCTATAACTCCCTCAG  
AAGAGCCAATATACATACATTATTGGACCTCTTAAATTACAGTCGAGAAGATCTAATGAGAATTGAACACTTCGGGAAGG  
AATCTGTGCAACAGGTATTGGAAGTTCTA-----CAAAAACCTTTTTGCA---ATTGAT-----  
-----

-----ATGCGATTAGAT---GAA---

AATGAGGGAGCGTTTACAATCCCTGAATTTGGTAAGATACAATTTGAAGGATTTTGTGCTTTTATCGATCAGGGCTTGAT  
GGAAGAACCTCATAATTTTCCAAAAATTGAG-----  
GATATAGATAAAGAAATTTGAATTCAGGCTTTTTGGTAATGAATATGAATTAGCAGAACCTTTCATCAAAGAGAGAGATGC  
TGTATATCAGTCCCTT---ACATATTACTCTGAATTATATGTACCAGCAAGATCGATTCCGAGGAAT-----  
AGTAGGAAGATACAGAAACAACTGTATTTCTCGGAAATATTCCTTTAATGAATTCCCATGGAACATTTGTAGTAAATGG  
GATTTACAGAGTCGTAGTTAATCAAATATTAATAAGTCCTGGTATTTATTACCGTTTCGGAATTAGACCAT---AATAGA-  
--

ATTAATTATATATATACTGGCACTCTGATTTTCAGATTGGGGAAGAAGATCGAAATTAGAGATCGATGTGGGAGAAAGGAT  
ATGGGCTCGTGTAAAGCAGAAAAACAAAAATATCTATTCCAGTTCTATTATCAGCTATGGGTTTAAATCTCGAAGAGATTC  
TGGACAATACTCGCTATCCCGAAAGATTTTTATTTTTATTGAAGAAGAAGGGGAGGTGGGAGCGGGAGGAATATCTATGG  
TCGAGGGAAAAAGCCATTCTGGAGTTTTATAAAAAACTC-----TACTGTATAAGTGGCGAT---TTGGTATTT---  
TCCGAGTCTCTATGTAAGAATTGCAAAAAAAATTTTTCCGAAAAAGATGTGAATTGGGAAAGATTGGTTCGACGAAATCT  
GAACCAAAAACCTGAACCTTGATATACCCGAGAACGAGATTTTTTTCATTACCACAAGATGTATTGGCTGCTGTGGATTACC  
TTATCGGGGTTAAATTTGGAATGGGTACACTCGATGAT-----  
ATAGATCACCTCAGAAATCGACGGATTCTGTTCTGTAGCAGATTTATTACAGAATCAATTTAGATTAGCTCTAGGTCGTTT  
AGAAGATGCAGTTAAAAGAACTATACGCAGAGCAACCAAGCGCAGA-----TCAACTCCT-----  
CAGAACCTGGTCACTTCAACTCTA-----

TTAAAAAACACTTTTCAAGATTTTTTGGTTCACACCCCTTATCCCAATTTTTGGATCAAACCTAATCCATTGACGGAAAT  
AGCTCATGGGCGAAAATTGAGCCATTTAGGTCCTGGGGGCTTAACAGGGCGAAGTCTAGTTTTTCGGACACGGGATATTC  
ATCCCAGTTATTATGGGCGTATTTGTCCAATCGATACGTCCGAAGGAATGAATGCTGGACTTGTTCATCATTATCTATT  
CATGCAAAAGATTGGTGTAT---TGTGGTCTTTACAAAGTCCATTCTATAAG-----ATCTCC---GAGAGATCGAGA--  
-----GAAGAACATATGGTTTTATCTACTACCAGGAGAGAAGATGAGGATGAATACTAT-----  
CGGATAGCTACGGGAAATTTCTTTGGCGTTAAATCAAGGA---ATTCAAGAGGAACAAATTAATCTCCA---  
GCTCGATACCGACAAGAATTTATAGTTATTGCATGGGAACAAATCCATTTCAGAAGTATTTTTCTTTCCAATATTTTTCT  
CGTTGGAGTTTTCCCTTATTCCTTTTCTCGAACATAATGATGCGAATCGCGCTCTAATGGGTTCTAATATGCAGCGTCAAG  
CAGTTCCACTTTTTTCGACCCGAGAAGTGCATTGCCGGAAGTGGGTTGGAAGGTCAAGCAGCTCTAGATTTCAGGAAGTGT  
GCTATAGCTACACAAGAGGGAAGGATCGAGTATATCGATGCTGTAAATATAACTTCATCGGTTAATGGA---GAC-----  
-----ACT-----

GTACGAACAGAATCGGTTATATATCAACGTTCTAATACCAATACTTGTACGCATCAAAAACCTCAAATTCATCAAGGG--  
----

GAATGTGTAAAGAAGGGACAAATTTCTGGCGGATGGTGCAGTACGGTAGGCGGAGAACTATCTTTGGGAAAAAACGTTTT  
AGTAGCTTATATGCCATGGGAAGGATACAATTTGAAAGACGCAATACTCATTAGTGAACGTCTGGTATATGAAGATATTT

ATACCTCTTTCCATATCGTAAGATACAGGATTGAAATCTGTATGACGAGCCAGGGT---CCT---  
GAAAGAATCACTAGAGAAAATACCTCATTTAGATGCTCATTACTTCGTCATTTGGACGAAAATGGTCTTGTAAATGCTAGG  
ATCTTGGATAGAAACAGGTGATGTTTTGGTAGGTAAATTAACGCCTCAAACAATAGAAGAA---  
TCATTATGTACCCAGAAGGAAGATTATTACAAACCATATTTGGTATTGAGGTATCCACTGCGAGAGAAAATTGTCTCAG  
AGCACCTATAGGTGGAAGGGGTCGAGTTATCGACGTGAGATGGATCAATAGA---  
GTAGATGATTCCGGTGATAATGCGGAAACAGTA---  
CACGTATATATATCACAAAAACGTAAGATACAAGTGGGTGATAAAGTATCTGGAAGGCATGGTAATAAAGGTATTATTTCC  
AATAGTTTTGCCAGACAAGATATGCCCTATTTGCAAAATGGAATACCAGTTGATATGGTATTGAATCCATTAGGGGTAC  
CTTCACGAATGAATGTAGGACAGATCTTTGAATGTTTTGCCGGTTTTAGCAGGAAACCCGATGAACAAACATTATAGAATA  
ACACCTTTTGACGAAAATACGAGCGGAGAAGCTTCGAGAAAACCTAGTGTTTTCTGAACTTTACAAAGCTAGTGAGCAAAC  
AGCTAAT---  
CCATGGGTATTGGAACCAGATCATCCTGGAAAACATAGATTAATTGATGGAAGAACAGGAGATGTTTTTGAACAACCTGT  
TACAATAGGAAAAGCTTATATGTCGAAATTGAGTCATCAAGTTGATGAGAAAATACATGCACGTTTCGAGTGGACCTTATG  
CACGGGTTACACAACAACCTCTTAGAGGAAAATCCAAACGAGGGGGGCAACGAATAGGAGAAAATGGAAGTTTGGGCTCTA  
GAAGGTTTTGGTGTGCTTATATTTTACAAGAGATGCTTACTCTCAAATCTGACCATATTAGAACTCGTAATGAAGTACT  
TGGTGCCATTATCACTGGAGGGCCAATACCTAAACCTGAC-----  
ACTGCTCCAGAATCTTTCCGATTGCTCATTTCGAGAATTACGATCTTTAGCTCTAGAATTGAATCATGCTATTATATCT--  
----GAGAAAAACTTT-----CAGATAGAT-----AGAGAGGAAGTT-----  
ATGATTGACCAGAAT-----  
AAACATCAACAACCTTCGAATTGGATTAGCTTCTCCCGAACAGATTTGTGCTTGGTCCGAAAAAATTTTACCTAATGGTGA  
GATAGTTGGACAGGTGACTAAACCTCATACTCTACATTAT-----  
GAAACTAATAAACCAGAAAGAGATGGATCGTTTTGTGAAAGAATCTTTGGACCTATCAAAGTGGAGTTTGTCTTGTGG  
AAATTCT-----CCAGGGATTGGAAATGAGAAGATA---  
GATGCAAAATTTTGCACACAATGTGGAGTTGAATTCGTTGATTCTCGAATTCGAAGATATCAAATGGGATACATTAAACT  
GGCATGCCCGGTGGTTACGTATGGTATTTGAAACGCCTTCCCAGTTATATTGCGAATCTATTAGCTAAAACCTCGGAAAG  
AATTAGAAGGTCCAGTATACTGCGAT-----  
CTTTTTCTTGCTAGGCCCATAGCTAACAAACCAACT---TTATTGAGATCACGGGGT---ACATTCGATTAT-----  
-  
GAGATTCAATCCTGGAGAGAGATTATTCTCATTACCTCTCTGCTCGTCCTTATTACCTCTTTCTCGGGGTTCTGGAAC  
ATTTAAAGAGAGAGAAAATAGCTACTGGGGGAGATGCTATCGGGAAACAATAATGGGTCTGGATCTGCAAAATGATTATAG  
ATCGTTTACATATGGAATGGAAGAAGCTTGGTGAATTGAAATGGAATAGATTGGAAGAGAACCAAGAA-----  
TCTACT-----GTG-----GATAGA-----TGGGAGGATGAAAAAATTAGA-----  
AGAAGAAAGGATTTTCTGGTTGGACGCATGAAATTGGCTAAACATTTTCTCCGAACAAATATAGAACCAAAATGGATGGT  
CTTATGCCTATT  
Piper  
CTCTTTATAGAAATATGGACAAATGGAAGTTTAACTCCTAAGGAAGCACTTTACGAAGCTTCCCAGCAATTTAATTGATTT  
ATTTATTCCTTTCTACATGCGGAAGAG-----CGGGAAATCCAT-----TTAGAGGACAATGCA---  
AACGGGGTCCCTTTAGCTCTTTTTACCTTTTCATGATGAA-----TTCGCTATCACTAATATAAGG-----  
AAAAACAAAAAATGCGGTTGAAAAGTATTTTTATTGATCAATCAGAATTGCCTTCCAAGACCTATAACTGTCTCAA  
AAAGTCCAATATACATACATTATTGGACCTTTTGAATAACAGTCAAGAAGATCTTCTAAAAATTTGAACATTTTTGCATGG  
AAGATGTGAAACGGATATTGGACATTCTA-----CAGAAACATTTCCGA---TTTGATTTACCTAAAAAT---  
GGAAAA-----  
-----ATGCTACGGAAT---AGA---  
AATGAGGGAATGTCTACAATACCGGAGTTTAGCCAGATACAATTTGAAGGGTTTTGTAGGTTTATTGATTGGGGCTTGGC  
CGAAGAACCTCATAAGTTTCTTAAAATTGAA-----  
GATACAGATCAAGAAATTGAATTTCAATTTTGTGCAAAACATATCAATTTGGCAGAACCTTTGATAAAAAGAGCGGATGC  
TGTGTATGAATCACTC---ACATATTTCTTGAATTTGATGTACCCCGCAGGATTGATTTGGAAGCCC-----  
GGTAAAGATATGCAAGAACAGACCGTATTTCATTGAAATATTTCTCTAATGAGTTCCTTGGGAATCTTCATAGTAAATGG  
AATATACAGAATTGTGATCAATCAAATATTGCAAAGTCCCAGCATTATTATCGTTTCAAGATTGGACCAT---AACGGA-  
--ATTTTT---  
ATCTATACCGGGACCATAATATCAGATTGGGGAGGAAGATCAGAATTAGAGATTGATAGAAAAGCAAGAATATGGGCTCG  
TGTGAGTAGGAAACAAAAAATATCTATTCTAGTTTTCATCATCGGCTATGGGTTTCAATTTAAGAGAAATTTAGAAAATG  
TCCGTTACCCTGAAATTTTCTTGTCTTTTCTGAAATGAAAGGGAT-----  
AAAAAAAAGATTGGGTCAAGGGAAAATGCAATTTTGGAGTTTTATCAACAATTT-----GCGTGTGTAGGTGGGGAC--  
-CCGGTATTT---  
TCTGAGTCTTTATGTAGGGAATTACAAAAAATTTTTTCAACAAAGGTGTGAATTAGGTAGGATTGGTCGACGAAATAT  
GAACCGGAGGCTGAATCTTGATATACCCAGAAATAATACATTTTTTGTACCACGAGATGATTGGCCGCTGCGGATCATT

TGATTGGCATGAAATTTGGAATGGGCACACTTGACGAT-----  
ATGAACCACTTGAAAAATAAACGTATTCGTTCTGTAGCAGATCTATTACAGGATCAATTTGGATTGGCTCTGGTTCGTTT  
AGAAAATGTAGTTCGAGGCACTATATGCGGAGCAATCCGGCATAAATTGATACCGACTCT-----  
CAGAATTTGGTAACCTTCAACTCCA-----  
TTAACAACCACTTATGAATCGTTTTTCGGGCTACACCCTTTATCTCAAGTTTTGGATCGAACGAATCCATTGACTCAAAT  
AGTTCATGGGCGAAAATCGAGTTATTTGGGCTCTGGAGGATTGACAGGGCGAACCCGCCAGCTTTTCGGATACGAGATATCC  
ATACTAGTCACTATGGGCGTATTTGCCCAATTGACACGTCTGAAGGAATCAATGTTGGGCTTATTGGATCTTTAGCCATT  
CATGCAAGGGTTGGCCCT---TGGGGTCTATAAAGACTCCATTTTATGAA-----ATATCT---GAGAGATCGAAA--  
-----AGGTTACAGTTGGTTTTATTTATCACCAAGTGTA-----GATGAATACCAT-----  
ATGGTAGCGGCAGGAAATCTTTGGCGCTAAATCGGGGT---ATTCAGGAAGAACAGGCTGTTCCA---  
GCCCCATACCGTCAAGAATTCCTGACTATTGCATGGGAACAAATTCATCTTCGAAGCATTTTTCCCTTCCAATACTTTTTC  
TATGGGAGCCTCCCTCATCCCTTTTATTGAGCATAATGACGCGAATCGGGCTTTAATGAGTTCAAATATGCAGCGCCAAG  
CAGTTCCGCTTTCTCGGTCCGAGAAGTGCATTGTGGAACTGGGTTGGAACGACAGGCGGCTCTAGATTGAGGGTTTCC  
GCTATATCCGAACGCGAAGGAAAGGTCATTTATACCAATACAGATAAGATCATTTTATCAGGTAATGGA---GAC-----  
-----ACT-----  
ATAACCATTCCATTGGTTATGTATCAACGTTCCAACAAAAATACTTGTATGCATCAAAAAACTCAGGTTTCGCGAGGT--  
----  
AAGTGCATAAAAAAGGGACAAATTTTAGCGAATGGTGCAGCTACTGTTGGGGGTGAACTTGCTTTGGGAAAAAATGTATT  
AGTAGCGTATATGCCATGGGAGGGCTACAATTTGAAGATGCAGTACTAATTAGTGAACGTCTGGTATATGAAGATATTT  
ATACTTCTTTTTCATATACGGAAATATGAAATTCAGACTCATGTAACAAGCCAAGGT---CCT---  
GAAAGAATTACTAAGGAAATACCGCATTTAGAAACTCATTACTCCGAAATTTAGACAGAAATGGAATTGTGATGCTGGG  
GTCTTGGGTAGAGACAGGCGATATTTTAGTAGGTAATTAACACCTCAGACAGCGAAAGAA---  
TCGTGCTATGCCCCGGAGGATCGGTTATTACGAGCTATACTTGGCATTGAGGATCCACTTCAAAGGAAACTTGTCTAAA  
ACTACCTATAGGAGGAAGGGGTGAGTTATTGATGTGAGATGGATACAGAAA---  
AAGGGGGGTTCCAGTTATAATCCAGAACTATT---  
CGTGTATATATTTACAGAAACGTGAAATGAAAGTAGGTGATAAAGTAGCTGGAAGACATGGGAATAAGGGTATTATTTT  
CAAAATCTTGCCTAGGCAAGATATGCCTTATTTGCAAGATGGAACACCGGTTGATATGGTCTTCAACCCATTGGGAGTAC  
CTTACGAATGAATGTGGGACAGATATTTGAATGCTCGCTAGGGTTAGCGGGGGACTTTCTAGGCAGACATTATAGAGTA  
GCACCTTTTGTGAAAGATATGAGCAAGAAGCTTCGAGAAAAGTAGTGTCTTCTGAATTATATGAGGCTAGTAAGCAGAC  
AGCAAAT---  
CCATGGGTATTTGAGCCCGAGTATCCGGGAAAAAGCAGAATATTTGATGGAAGAACAGGGGATCCTTTTGACCAACCTGT  
TTTAATAGGAAAGTCTATATCCTGAAGTTAATTCATCAAGTTGATGATAAAATCCATGGACGCTCCAGTGGGCATTATG  
CACTTGTACACAACAACCCCTTAGGGGAAGGGCGAAGCAAGGGGGACAACGCGTAGGAGAAATGGAGGTTTGGGCTCTA  
GAGGGGTTTGGTGTGCTCATATTTTACAAGAGATGCTTACTTATAAATCTGATCATATTAGATCTCGCCAGGAAGTACT  
TGGTACTACGATCGTTGGAGGAACAATAGCTAATCCCGGG-----  
GATGCTCCAGAATCTTTTCGACTACTCGTTCGAGAACTACGATCTTTGGCTTTGGAAGTGAATCATTTCCTTTTATCT--  
----GAGAAAGACTTC-----CAGATTCAT-----AGGAAGGAAGCT-----  
ATGATCGACCGGTAT-----  
AAACATCAACAACCTTGAATTGGACCAGTTTCTCCTCAACAAATAAGTGCCTGGGCCAACAAAATCCTACCTAATGGCGA  
GATTGTTGGAGAGGTGACAAAACCTATACTTTTCATTAC-----  
AAAACGAATAAACCGGAAAAGGATGGATTGTTTTGTGAAAGAATTTCTGGGCCATAAAAAGTGAATTTGTGCTTGTGG  
AAATTAT-----CGAGTGATCGGAGATGAAAAAGAA---  
GACCCGAATTTTGTGAACAATGCGGAGTGAATTTGCGGATTCTCGGGCACGAAGATATCAAATGGGATACATCAAAT  
GACATGTCCAGTACTCATGTGTGGTATTTGAAACGTCTTCCCTAGTTATATCGCAAATCTGTTAGATAAACCCCTTAAG  
AATTAGAAGGCCTAGTCTATTGCGAT-----  
TTTTCTTTTGTAGGCCCGTAGCTAAAAAACCTACT---TTCTTACGATTACGGGGT---TTATTGCAATAT-----  
-GAAATCCAATCTCGAAAATATAGCATCCCCTTTTTTTTACTACC-----  
CAAGGCTTCGATACATTTGAAATCGAATAATCTACTGGAGCAAGTCTATCAGAGAACAATTAGCCGATCTAGATTT  
GCGAATTATTATAGATCGTTTATTGGTGAATGGAAGGAATTAGGGGAA-----  
GAAGGG-----TCCACT-----GGA-----AATGAA-----TGGGAAGATAGAAAAATAGGA-----  
-----  
AGACGGAAGGATTTTTTGGTTAGACGCATAGAATTAGCTAAACATTTTATTTCGAACAAATGTAGAACCAGAACGGATGGT  
TTTGTCCCTATT  
Platanus  
CTTTTTCTCGAAATATGGACGAATGGAAGTTAACTCCTAAAGAAGCACTTACGAAGCCTCCCGGAATTTGATTGATTT  
ATTTATCCCTTTTCTACATGCGCAAGAA-----GAGAACATCTTG-----TTAGAGGACAATCAA---  
AATGGGGTACTTTACCCTTTTTTACTTTTTCATGATAGA-----TTGGCG-----AAAATAAGG-----

AAAAACGAAAAAGAAATAGCATTGAAATATATTTTTATTGACCAATCAGAATTGCCTCCCAGAACCTATAATTGCCTCAA  
AAGGTCCAATATACATACATTATTGGACCTTTTCAATAACAGTCAAGAAGATCTTATGAAAATTGAAGATTTTCGCATAG  
AAGATGTAAAACAGATATTGGGCATTCTA-----CAAAGCATTTCACA---  
GTTGATTTACCGAAGAATAAGTTTTAA-----  
-----ATGCGCCGGGAT---GGA---  
AATGAGGGAATGTCTACAATACCTGGGTTAATCAGATACAATTTGAGGGATTTTGTAGGTTTCATTGATCAAGGCTTGAC  
GGAAGAACTCTATAAGTTTCCAAAAATTGAA-----  
GATACAGATCAAGAAATTGAATTTCAATTATTTGTAGAAACATATCAATTGGTAGAACCTTGATAAAAGAAAGAGATGC  
TGTGTATGAATCACTC---ACATATTCTTCTGAAGTATATGTACCCGCGGGATTAATTTGGAAACCC-----  
GGTAGGATATGCAAGAACAACCATTTTTATTGGAAACATTCCCTCTAATGAATCCCTGGGAACCTCTATAGTAAATGG  
AATATACAGAATTGTGATCAATCAAATATTGCAAAGCCCCGGTATTTATTACCGTTCCGAATCCGACCAT---AACGGA-  
--ATTTCG---  
GTCTATACCGGCACCATAATATCAGATTGGGGAGGAAGATCAGAATTAGAGATTGATAGAAAAGCAAGGATATGGGCTCG  
TGTGAGTAGGAAACAAAAATATCTATTCTAGTTCATCATCAGCTATGGGTTCGAATCTAAGAGAAATTCTAGATAATG  
TTTGCTACCCTGAAATTTTCTTGTCTTTCTGAATGATAAGGAG-----  
AAAAAAAAGATTGGGTCAAAGAAAATGCCATTTTGGAGTTTATCAACAATTT-----GCTTGTGTAGGCGGGGAT--  
-CCGGTATTT---  
TCTGAGTCCTTATGTAAGGAATTACAAAAGAAATTTTTTCAACAAAGATGTGAATTAGGAAGGATTGGTCGACGAAATAT  
GAATCGGAGACTGAATCTTGATATACCTCAGAACAATACATTTTTTGTACC GCGAGATGTATTGGCAGCTGCGGATCATT  
TGATCGGAATGAAATTTGGAATGGGTACACTTGACGAT-----  
ATGAATCACTTGAAAAATAAACGCATTCTGTTCTGTAGCGGATCTCTTACAAGATCAATTTGGATTGGCTCTGATTGCGTT  
AGAAAATGTGGTTCGAGGAACCTATATGTGGAGCAATTAAGCATAAATTGATACCGACTCT-----  
CAGAATTTGGTAACCTTCAACTCCA-----  
TTAACAACCACTTATGAATCATTTTTCGGCCTACACCCCTTATCTCAAGTTTGGATCGAACTAATCCATTGACACAAAT  
GGTTCATGGGCGAAAATTGAGTTATTTGGGTCCTGGAGGATTGACGGGGCGAAGTCTAGTTTTCGGATACGAGATATCC  
ATTCTAGTCATTATGGACGATTTGCCCAATTGACACGTCTGAAGGAATCAACGTTGGACTTATTGGATCTTTAGCGATT  
TATGCGGAGGATGGTCAT---TGGGGATCTCTAGAAAGCCCATTTTATGAA-----ATATCT---GATAGATCCAAA--  
-----GAAGTACAAATGCTTTATTTATCAACCAAGTAGA-----GATGAATACTAT-----  
ATGGTGGCGGGGAAAATTTTGGCGTTGAATCAGAGT---ATTCCGGAAGAACAGGTTGTTCCA---  
GCTCGATACCGTCAAGAATTCCTGACTATTGCATGGGAACAAGTTCATTTTTCGAAGCATTTTTCCCTTCCAATATTTTTCT  
TATTGGAGCTTCCCTCATTCTTTTATCGAGCATAATGATGCGAATCGGGCTTTAATGAGTTCTAATATGCAACGTCAAG  
CAGTTCGCTTTTCTCAGTCCGAGAAGTGCATTGTTGGAAGTGGGTTGGAACGCCAGGCGGCTCTAGATTCGGGGGTTTCT  
ACTATAGCGGAACACGAGGGAAAGATCATTATACCGATACTGATAAGATCATTTTATTAGGTAATGGA---GAC-----  
-----ACC-----  
CTAAGTATTCATTGGTTATGTATCAACGTTCCAACAAAAATACTTGTATGTATCAAAAACCCAGGTTCCGGCGGGGT--  
----  
AAATTCATTAAAAAGGGACAAATTGTAGCGGATGGTGCCGCTACAGTTGGTGGCGAAGTCTGCTTTGGGAAAAAACGTATT  
AGTAGCCTATATGCCATGGGAAGGTTACAATTCTGAAGACGCAGTACTCATTAGCGAGCGTCTGGTATATGGAGATATTT  
ATACTTCTTTTACATACGGAAATATGAAATTCAGACTCATGTGACAAGCCAAGGC---CCT---  
GAAAGGATCACTAATGAAATACCGCATTTAGAAGCCCATTTACTCCGAAATTTAGACAGAAATGGAATTGTGATGCTGGG  
ATCTTGGGTAGAAACGGGTGATATTTTAGTAGGTAATTAACGCCTCAGATGGCGAAAGAA---  
TCATCGTATGCCCCGGAAGATAGATTATTACGAGCCATACTTGGCATTGAGGATCCACTTCAAAGGAACTTGTTTAAA  
ACTGCCTATAGGTGGCAGGGGTCGAGTTATTGATGTGAGATGGATCCAGAAA---  
AAGGGGGTTCCAGTTATAATCCAGAAACAATT---  
TGTGTATATATTTACAGAAACGTGAAATCAAAGTGGGTGATAAAGTAGCTGGAAGACATGGGAATAAAGGTATCATTTC  
CAAAATTTGCCTAGACAAGATATGCCTTATTTGCAAGATGGAACACCTATTGATATGGTTTTCAACCCATTAGGAGTAC  
CCTCACGAATGAATGTAGGACAGATATTTGAATGCTCGCTCGGGTTAGCGGGGATCTGCTAGACAGACATTATCGAATA  
GCACCCTTTGATGAGAGATATGAGCAAGAGGCTTCGAGAAAACCTAGTGTCTTCTGAATTATATAAAGCCAGTAAGCAAAC  
AGCGAAT---  
CCATGGGTATTTGAACCCGAGTATCCAGGAAAAAGCAGAATATTTGATGGAAGAACAGGAGATCCTTTTGAACAACCCGT  
TCTTATAGGAAAGTCTATATCCTGAAATTAATTCATCAAGTTGATGATAAAATCCACGGGCGTTCAGTGGACATTATG  
CGCTTGTACACAACAACCCCTTAGAGGAAGGGCCAAGCAAGGGGGACAACGGGTAGGAGAAATGGAAGTTTGGGCTCTA  
GAGGGATTTGGCGTTGCTCATATTTTACAAGAAATGCTTACTTATAAATCTGATCATATTAGAGCTCGTCAGGAAGTACT  
TGGTACTACGATCGTTGGAGGAACAATACCTAGCCCTGAG-----  
GATGCTCCAGAATCTTTTCGATTGCTCGTTCCGAGAACCTACGATCTTTGGCTCTGGAAGTGAATCATTTCCTTGTATCT--  
----GAGAAGAACTTC-----CAGATTAAT-----AGGAAGGAAGCT-----  
ATGATCGACCGGAT-----



AAACATCAACAACCTTCGAATTGGATCAGTTTTCTCTCAACAAATAAGTGCTTGGGCCAAAAAATCCTACCTAATGGAGA  
AATAGTTGGAGAGGTGACAAAACCTATACTTTTCATTAC-----  
AAAACCAATAAACCGGAAAAAGATGGATTGTTTTGTGAAAGAATTTTTGGCCCTATCAAAAGTGAATTTGTGCTTGTGG  
GAATTAT-----AGAGTAATCGGAGATGAAAAAGAA---  
GACCCGAAATTTTGTGAACAATGCGGAGTCGAATTTGTTGATTCTCGGGTACGAAGATATCAAATGGGATACATCAAACCT  
GGCATGTCCAGTAACCTCATGTGTGGTATTTGAAACGTCTTCTAGTTATATCGCGAATCTTTTAGATAAACCTCTTAGAG  
AATTAGAAGGCCTAGTATACTGCGAT-----  
TTTTCTTTTGTAGGCCCATAGCTAAAAACCTACT---TTCTTACGATTACGAGGT---TCATTGCAATAT-----  
-GAAATCCAATCCTGGAAATACAGCATCCCGCTTTTTTTTACTACT-----  
CAAGGCTTCGATACATTTGAAATCGAGAAATCTCTACAGGAGCAGGTGCTATCAGAGAACAATTAGCCGATCTGGATTT  
GCGAATTATTACAGCTTATTCATTGGTGAATGGAAAGAATTAGGGGAA-----  
GAAGGG-----CCCACA-----GGT-----AATGAA-----TGGGAAGATAGAAAAATTGGA-----  
----

AGAAGAAAGGATTTTTTGGTTAGACGCATGGAATTAGCTAAGCATTTTTATTTCGAACAAATGTAGAACCAGAATGGATGGT  
TTTGTGCCTATT

Populus

CTTTTTCTCGAAATATGGACAAATGGAAGTTAACTCCTAAAGAAGCACTTCATGAAGCCTCCCGGAATTTGATTGATTT  
ATTTATTCTTTTCTACATGCAGAAGAA-----GAAACTTCCAT-----TTAGAAAAAATCAA---  
CACAAGATTACTTTACCCCTTTTTGCTTTTCATGATAGA-----TTGGCT-----AAACTAAGG-----  
AAAAATCAAAAAGAAATAGCATTGAAATCTATTTTTATTGACCAACTCGAATTGGCTCCTAAGATTTATAATTGCCTAAA  
AAGGTCCAATATACATACATTGTGGGACCTTTTGAAGAACAGTCAAGAAGACCTTATGAAAATTGAACATTTTCGCATAG  
AAGATGTA AACATATATTTGGCATTCTAAAAATAGAAAAGCATTTCACA---ATTAATTTACCAAAGAAT---  
AAATTT-----

-----ATGCTTGGGGAT---GGA---

AATGGGGGAATGTCTACAATACCTGGATTTAATCAGATACAATTTGAAGGATTTTGTAGATTCATTGATCAGGGCTTAGC  
AGAAGAACTTTATAAGTTTCCAAAAATTGAA-----  
GATAGAGATCAAGAAATTGAATTTCAATTATTTGTGGAACATATCAATTAGTAGAACCATCGATAAAAAGAAAGAGATGC  
TGTATATGAATCACTT---ACATATTCTTCTGAATTATATGTATCCGGGGGATTAATTTGGAAAAAC-----  
AGTAGGGATATGAAGAACAACAATTTTTATTGGAACATTCCTCTAATGAATTCCTGGGAACCTTCTATAGTAAATGG  
AATATACAGAATTGTGATCAATCAAATATTGCAAAGTCTGGTATCTATTACCGGTGAGAATTGAACCAT---AACGGA-  
--ATTTG---  
GTCTATACCGGCACTATAATATCAGATTGGGGGGGAAGAGTAGAATTAGAGATTGATAAAAAAGCAAGGATATGGGCTCG  
TGTGAGTAGGAAACAGAAAATATCTATTTTAGTTCTATCATCAGCTATGGGTTTGAATCTAAGAGAAATTCTAGAGAATG  
TGTGCTACCCCGAGATTTTCTTGTCTTTCCTGAGCGATAAGGAA-----  
AAAAAAAATTTGGGTCAAGGGAAAATGCCATTTTGGAGTTTTATCAACAATTT-----ACTTGTGTAGGCGGAGGT--  
-CCAGTATTT---

TCTGAATCCTTATGTAAGGAATTACAAAAGAAATTTTTCAACAAAGATGTGAATTAGGAAGGATTGGTCGACTAAATAT  
GAACCAGAGACTGAATCTTGATATACCTCATAACAATACATTTTTGTTACCGCGAGATATATTGGCAGCCGCGGATCATT  
TGATTGGAATGAAATTTGGAATGGGTACACTTGATGAC-----  
ATGAATCATTTAAAAAATAAGCGTATTCGTTCTGTAGCGGATCTCTTACAAGATCAATTCGGATTGGCTCTAATTCGTTT  
AGAAAATGTGGTTAGAGGAACATATGTGGAGCAATTAGGCATAAATTGATACCGACCCCT-----  
CAAAATTTGGTAACCTTCAACTCCA-----

TTAACAACCACTTATGAATCTTTTTTCGGATTACACCCCTTATCTCAAGTTTTGGATCGAACGAATCCATTGACACAAAT  
AGTTCATGGGAGAAAATCGAGTTATTTGGGCCCTGGAGGATTGACAGGGCGAATGCTAGTTTTCGTATACGAGATATCC  
ATCCTAGTCACTATGGGCGCATTTGCCCAATTGACACGTCTGAGGGAAATCAATGTCGGACTTATCGGATCCTTAACAATT  
CATGCCAAGATTGGCCAT---TTGGGTCTTTAGAAAAGCCCGTTTTATGAA-----ATCTCT---GCGAGATCAAAA--  
-----AAAGTACGGATGCTTTATTTATCACC AAAATAGG-----GATGAATACTAT-----

ATGATAGCGGCAGGAAATTTGTTGGCGCTGAATCGAGGT---GCTCGGGAAGAACAGGTTGTTCCA---  
GCTCGATACCGTCAAGAATTCCTGACTATTGCATGGGAACAGGTGCGTCTTCGAAGTTTTTTCCCTTCCAATATTTTTCT  
TATTGGAGCTTCTCTCATTCTTTTATCGAGCATAATGATGCGAATCGGGCTTTAATGAGTTTGAATATGCAACGTCAAG  
CAGTTCGCTTGTCTGTTCCGAGAAGTGCATTGTTGGAACCTGGATTGGAACGCCAAGTGGCTCTTGATTGCGGGGTTCTT  
GCTATAGCCGAACACGAGGGAAAGATAATTTATACCGACATTGACAAGATTATTTTATCGGGGAATGGC---TAT-----  
-----ACT-----

GTAAGCATTCCATTAGTTATGTATCAACGTTCCAACAAAAATACCTGTATGCATCAAAAAACTCAGGTTTACGCGAGGA--  
----

AAATGCATTA AAAAGGGGACAAGTTTTGGCGGACGGTGCCGCTACAGTTGGTGGCGAACTCGCCTTGGGCAAAAACATATT  
AGTAGCTTATATGCCATGGGAAGGCTACAATTTGAAGATGCGGTACTCATTAGCGAACGTCTGGTATATGAAGATGTTT

ATACTTCTTTTTACATACGGAAATACGAAATTCAGACTCATGTGACAAGCCAAGGC---CCC---  
GAAAGGATCACTAACGAAATACCGCATCTAGAAGCCCATTTACTCCGAAATTTAGACAAAAACGGAATTGTGATGCTGGG  
ATCTTGGGTAGAGACAGGCATATTTTAAATAGGTAAATTAACGCCTCAATTGGCGAAAGAA---  
TCATCGTATGCCCCGAAGATAGATTATTACGAGCCATACTGGGCATTCAAGTATCTACTTCAAAGGAAACTTGTCTAAA  
ACTACCTACAGGCGGTAGGGGTCGAGTTATTGATGTGAGATGGATCCAGAAA---  
AAAGGGGGTTCCAGTTATAATCCAGAAACAATT---  
CGCGTATATATTTTACAGAAACGTGAAATCAAAGTAGGGGATAAAGTCGCTGGAAGACATGGAAATAAAGGCATCATTTC  
CAAAATTTTGCCTAGACAAGATATGCCTTATTTGCAAGATGGAGCACCTGTTGATATGGTCTTCAACCCATTAGGAGTAC  
CTTCACGAATGAATGTAGGACAGATATTTGAATGCTCACTCGGGTTAGCGGGAAGTCTGCTAGATAGACATTATCGAGTA  
GCACCTTTTGTAGAGAGATATGAACAAGAGGCTTCGAGAAAACCTAGTATTTTCTGAATTATATGAAGCCGGTAAGCAAAC  
AGGAAAT---  
CCGTGGGTATTTGAACCCGAATGCCCGGGAAGTAGAATATTTGATGGAAGAACGGGAGATCCTTTTGGAGCAGCCTGT  
TATAATAGGAAAGCCTTATATCTTGAAATTAATTCATCAAGTTGCTGATAAAAATACATGGACGTTCCAGTGGGCATTATG  
CACTTGTACACAACAACCCCTTAGAGGAAGGGCCAAACAAGGGGGACAACGGGTAGGAGAAATGGAGGTTTGGGCTCTA  
GAGGGATTTGGTGTCTCATATTTTACAAGAGATGCTTACTTATAAATCTGATCATATTAGAGCTCGCCAAGAAGTGT  
TGGTACTACGATCAGTGGACGAACAATACCTAAACCTGAG-----  
GATGCTCCAGAATCTTTTCGATTGCTCGTTCGAGAACTACGATCTTTGGCTCTGGAACCTGAAACATTTTCTTATATCT--  
---GAGAAGAACTTC-----CAGATTAAT-----AGGAAGGAAGTT-----  
ATGAATCAGAATTTTTCTTCTATGATCGATCGGTAT-----  
AAACATCAACAACCTCCGAATTGGATCAGTTTCGCCTCAACAAATAAGTGCTTGGACTAATAAAAATCCTACCTAATGGAGA  
GATTGTTGGAGAGGTTACAAAACCTATACTTTTCATTAC-----  
AAAATAATAAACCTGAAAAAGATGGATTATTTGTGAAAGAATTTTTGGGCCTATAAAAAGTGAATTTGTGCTTGTGG  
AAATTAT-----CGAGTAATTGGCGATGAAAAAGAA---  
GAACCAAAATTTTGTGAACAATGCGGGGTGCAATTTGTTGATTCTCGGATACGAAGATATCAAATGGGCTACATCAAAC  
GGCATGCCAGTAACCTCATGTGTGGTATTTGAAACGTCTTCTAGTTATATCGCCAATCTTTTAGATAAACCTCTTAAAC  
AATTAGAAGGCTTAGTATACTGCGAT-----  
TTTTCTTTTGTAGGCCCATAGCCAAAAACCTACT---TTCTTACGATTACGAGGT---TCGTTCGAATAT-----  
-GAAATACAATCTTGGAAATACAGTATTCGCTTTTTTTTACTACC-----  
CAAGGGTTCGATACATTTGAAATCGAGAAATTTCTACTGGAGCTGGTGTCTATCCGAGAACTATTAGCCGATCTGGATTT  
GCGAATTTCTAGATTATTCGTCGTTAGAATGGAAGAATTAGGGGAA-----  
GAAGGA-----CCCACC-----GGG-----AATGAA-----TGGGAAGATCGAAAAGTTGGA-----  
-----  
AGAAGAAAGGATTTTTTAGTTAGACGCGTGAATTAGCTAAGCATTTTTATTCGAACAAATATAGAACCAGAATGGATGGT  
TTTATGTCTATT  
Ranunculus  
CTTTTTCTAGAAATATGGACGAATGGAAGTTAACTCCTAAAGAAGCACTTTACGAAGCCTCGCGCAATTTAATTGATTT  
ATTTATTCCTTTTCTACATGCAGAAGAA-----CAAGACCAAAAT-----  
TTAAAGGACAATCAAAAAAATGGGGTACTTTACCATTTTTTACTTTTCATGATGGA-----TTTGAT-----  
AAACTAAAA-----  
AAAAACAAAAAAGAAATTGAATTGAAATGTATTTTTATTGATCAATCAGAATTGCCTTCCAGGACCTATAATTGCCTTAA  
AAGGGCTAATATACATACATTATTAGACCTCTTGAATAAGAGTCAAGAAGATCTTATGAAAATAGAGCATTTCGCATAG  
AAGATGTAAAACAGATATTGGACATTATA-----CAAAGCATTTTGTGCGTAATTGATTTACCTAAAAATAAG-----  
---TTT-----  
-----ATGCTCCGGGAT---GGA---  
AATCAGGGAATGTCTACAATACCTGGGTTTAGTCAGATACAATTTGAGGGATTTGTAGATTCATTGATCAGGGATTGGC  
GGAAGAATCTTCAAGTTTCCAAAAATTGAA-----  
GATACAGATCAAGAAATTTGAATTTCAATTTTGTGGAAACATATCAATTAGTAGAACCTTGGATAAACGAACGGGATGC  
TGTGTATGAATCACTC---ACATATTCTTCTGAATTATATGTGCCCGGGGATTAATTTGGAAAAAT-----  
GGTAGGGATACGCAAGAACAACAATATTTATTGGAAAAATTCCTCTAATGAATCTTTTGGAACTTTATAATAAATGG  
AATATACAGAATTGTGATCAATCAAATATTGCAAAGCCCCGGTATTTATTACCGTTCAGAGTTGGATCAT---AACGGG-  
---ATTTCG---  
GTCTATACCGGTACCATAATATCAGATTGGGGAGGAAGATCAGAATTAGAGATTGATAGAAAAGCAAGGATATGGGCGCG  
TGTAAGTAGGAAACAAAAAATATCTATTCTAGTTCATCATCAGCTATGGGTTGCAATCTAAGAGAAATTATAGATAATG  
TTTGCTACCCCGAAATTTTCTTGTCTTTTCTGAATGATAAGGAA-----  
AAAAAAAATAGGATCAAAGGAAAATGCAATTTTGGAGTTTTATCAACAATTT-----GCTTGTGTAGGCGGGGAT--  
-CCGGTATTT---  
TCGGAGTCCTTATGTAAGGAATTACAAAAAATTTTTTCAACAAAGATGTGAATTAGGAAGGATTGGTCGACGAAATAT

AAACCGTAGACTGAATCTTGATATACCTCAGAACATTACATTTTTGTTACCACGGGATATCGTGGCGGCTGCAGATCATT  
TGATCAGAATGAAATTTGGAATGGGTACACTTGACGAT-----  
ATGAATCATTTGAAAAATAAACGTATACGTTCTGTAGCGGATCTGTTACAAGATCAATTCGGATTGGCTCTGGTTCGTTT  
AGAAAATGTGGTTCGAGGGACTATAGGTGGAGCAATCCGGCATAAATTGATACCGACGCCG-----  
CATAATTTGGTAACCTCCACTCCA-----  
TTAACAACCCTTATGAATCCTTTTTTGGCCTACACCCCTTATCTCAAGTTTTGGATCGAACGAATCCATTGACACAAAT  
AGTTCATGGGCGAAAATTGAGTTATTTGGGTCTGGGGTGGTTCGACAGGACGAATGCCAGTTTTCCGATACGAGATATAC  
ACCCTAGTCACTATGGACGTATCTGCCAATTGACACATCGGAAGGAATCAATGTTGGACTCATTGGATCCTTAGCAATT  
CATGCAAGGATTGGTCAT---TGGGGTCTGTTAGAAAGGCCCTTTTATGAA-----ATTTCT---GAGAAATCAAAA--  
-----GAGGTACGCGTGGTTTTATTTATCACCAAGTAAA-----GATGAATACTAT-----  
ATGGTAGCGGCGAGCAATTTCTTAGCGTTGAATCGGGT---ATTCAGGAAGAACAGGTTGTTCCA---  
GCTCGATATCGCAAAGAATTTCTGACTATTACATGGGAGCAGATTCATCTTCGAAGCATTTTTCCCTTCCAATATTTTTCT  
TATTGGAGCTTCTCTTATTCTTTTTATCGAACACAATGATGCAAAATCGAGCTTTAATGAGTTCTAATATGCAACGTCAAG  
CAGTTCCACTTTGTCGATCGGAGAAGTGCATTGTTGGGACGGGGTGGAAACGCCAAGTGGCTCTCGATTCTGGGGTTC  
GCTATAGCCGAACATGAGGGAAAGATCATTATACCGATACTGACAAGATCATGTTATCAGGTAATGGG---GAC-----  
-----ACT-----  
CTAAGCATTCCATTGGTTATGTATCAACGTTCCAATAAAAAATACTTGTATGCATCAAAAACCCCGGTTCCACGGAGT--  
----  
AAATGTATTAATAAAGGGACAAATTTAGCTGATGGTGCCGCTACAGTTGGTGGCGAACTCGCTTTGGGAAAAAATGTATT  
AGTAGCTTATATGCCGTGGGAGGGGTACAATTTGAAGATGCGGTACTTATTAACGAACGTCTGGTATATAGAGATATTT  
ATACTTCTTTTACATACGGAAATATGAAATTCAGACTCATGTGACAAGCCAAGGT---CCT---  
GAAAGAATCACTAATGAAATACCACATTTAGAAGCCCCTTACTTCGCAATTTAGACAGAAATGGAATTGTGATGCTGGG  
GTCGTGGGTAGAAACGGGTGATATTTTAGTAGGTAATTAACGCCACAGATAGCCAAAGAA---  
TCGTATATGCCCCGGAAGATAGATTATTACGGGCCATACTGGTATTACAGGTATCCACGGCAAAGGAACTTGTCTAAA  
ACTACCTATAGGTGGCAGAGGCCGAGTTGTTGATGTGAGATGGATTACAGAA---  
AAAGGGGGTTCCAGTTATAATCCAGAAACGATT---  
CGTGTATATATTTACAGAAACGTGAAATAAAGTAGGGGATAAAGTAGCCGGAAGACATGGGAATAAGGGTATCATTTC  
AAAAATTTGCCTAGACAAGATATGCCTTATTTGCAAGATGGAACACCCGTTGATATGGTCTTCAACCCGTTAGGAGTAC  
CTTCACGAATGAATGTGCGACAGATATTTGAATGCTCGCTCGGGTTAGCAGGGAATCTGCTAGACAGGCATTATCGAATA  
TCACCCTTTACGAGAGATATGAGCAAGAGGCTTCGAGAAAACCTAGTGTCTTCTGAATTATATCAAGCCAGTAAGCAAAC  
TGGGAAT---  
CCATGGGTATTTGAACCCGAGTATCCGGGAAAAAGCAGAATCTTTGATGGAAGAACGGGGGATCCTTTTTGAACAACCTGT  
TATAATAGGAAAGTCTTATATTCTGAAATTAATTCATCAAGTTGATGATAAAATTCATGGACGTTCTAGTGGACATTACG  
CACTTGTACACAACAACCCCTTAGAGGAAGGGCCAAGCAAGGGGGACAGCGGGTAGGAGAAATGGAAGTTTGGGCTCTA  
GAGGGGTTTGGTGTGCTCATATTTACAAGAGATGCTTACTTATAAATCGGATCATATTCGAGCTCGTCAGGAAGTGT  
TGGTACTACGATCATGGGAGGGACAATATCGAACCCCGAG-----  
GATGCTCCCGAATCTTTTCGACTGCTCGTTCGAGAACTACGATCTTTGGCTCTGGAAGTGAACCATTTCTTGTATCT--  
----GAGAAGAACTTC-----CAGATTAAT-----AGGAAGGAAGCT-----  
ATGATCGACCGATAT-----  
AAACATCAACAACCTTCAAATTTGGATTAGTTTTCTCCTCAACAAATAATTACTTGGGCCGAGAAAATTTTACCTAATGGAGA  
GATTGTTGGAGAGGTAACAAAACCTATACTTTTCATTAC-----  
AAAACCAATAAACCAGGAAAAAGATGGGTTGTTTTGTGAAAGAATTTTTGGACCCATAAAAAGTGGAAATTTGTGCTTGTGG  
AAATTAT-----CGAGTAATCGGAAATGAAAAAGAA---  
GACCCGAAATTTTGTGAACAATGTGGAGTCAATTTGTGGATTCTCGAGTACGAAGATATCAAATGGGATACATTAACT  
CGCGTGTCCAGTAACTCATGTGTGGTATTTGAAGCGTCTTCCTAGTTATATCGCGAATCTTTTAGATAAACCTCTTAAAG  
AGTTAGAAGGCCTTGTATATTGTGATGTGTTTATCGAATCTATCCCAATTTTTCTTTTGTAGGCCCGTAGTTAAAAAC  
CCGACT---TTCTTGCATTACGAGGT---TCATTCAATAT-----  
GAAATCCAATCATGGAATACAGTATCCCGCTTTTTTTTTACTACA-----  
CAAGGATTTGATACGTTTCGAAATCGAGAAATATCTACTGGAGCAAGTCTATCAGAGAACAATTAGCCGATCTGGATTT  
GCGACTTATTATAGATTGTTTATTGTTAGAAAGAAATTTGGGTGAA-----  
GAGGGG-----CCCGCC-----GGT-----AATGAG-----TGGGAAGATAGAAAAATGGGA-----  
----  
AGAAGAAAGTCTTTTTTGGTTAGACGTATGGAATTAGCTAAGCATTTTATTCGAACAAATGTAGAACCAGAACGGATGGT  
TTTGTGCCTATT  
Spinacia  
CTTTTTCTCGAAATATGGACAAATGGTAGTTAACTCCGAAAGAAGCACTTTATGAAGCCTCTCGGAATTTAATTGATTT  
ATTAATTCCTTTTCTACATGCGGAA-----GAAAACGTAAAT-----TTAGAGGACAATCAA---

CACAAAGTTTCTTTACCCCTTTTTACCTTTTCATAATAGA-----TTGGCT-----GAAATAAGG-----  
AAAAACAAAAAAAAAATAGCATTGAAATTCATTTTTATTGACCAATTAGAATTGCCACCTAGGATCTACAATTGCCTAAA  
AAAATCCAATATACACACATTATTGGACCTTTTGAATAACAGTCAAGAAGATCTTATTAAAATGAAGCATTTTCGCATAG  
AAGACGTAAAACAAATATTTGGCACTCTA-----GAAAAGCATTTTCGTA---ATTGATTTA---AAAAATAAA-----  
---AGA-----  
-----ATGCTACGGGAT---GGA---  
AATGAGGGAATGTCTACAATCCCTGGGTTAATCAGATACAATTTGAAGGATTTTGGAGGTTTATTGATCAGGGCTTAAC  
GGAAGAACTTTCTAAGTTTCCAAAAATGGAA-----  
GATACAGACCAAGAAATTTGAATTTCAATTATTTGTGGAAACATATCAATTAGCAGAACCCTTGATAAAAAGAAAAAGATGC  
TGTGTATGAATCACTT---ACATATTCTTCTGAATTATATGTGTCCGCGGGATTAATTTGGAAAACC-----  
CGTAGGGAGATGCAAGAACAACAATTTTGAATTGAAAATATTCCTCTAATGAATTTCTCTAGGAACCTTTTATAGTAAATGG  
AATATACAGAATTTGTGATCAATCAAATATTGCAAAGCCCGGGTATTTATTACCGATCCGAATTAGACCAT---AACGGA-  
--ATTTTCG---  
GTCTATACCCGGCACCATAATATCAGATTGGGGAGGAAGATCAGAATTAGAGATTGATAGAAAAGCACGGATATGGGCTCG  
GGTGTAGTAGGAAACAGAAAATATCTATTTTAGTTCTATCATCAGCTATGGGTTCAAATCTAAGAGAAATTTCTGGATAATG  
TTTGCTACCCGGAAATTTTCTTGTCTTTTCTGAATGATAAGGAG-----  
AAAAAAAAAATTTGGGTCAAAGAAAATGCCATTTTGGAGTTTTATCAACAATTT-----GCTTGTGTGGGTGGGGAT--  
-CCGGTATTT---  
TCGGAATCCTTATGTAAGGACTTGCAAAAAAAAATCTTTCAACAAAGATGCGAATTAGGAAGGATTGGTTCGACGAAATAT  
GAACCGGCGACTGAACCTTGTATATACCCGAAAATAATACGTTTTTGTACC GCGGGATATATTGGCAGCTGCGGATCATT  
TGATTGGAATGAAATTTGGAATGGGTACACTTGATGAT-----  
ATGAATCATTGAAACATAAACGTATTAGGTCTGTGCGAGATCTCTTACAAGATCAATTCGGATTGGCTCTAGTTCGTTT  
AGAAAACGTGGTTCGAGGAACATAAGTGGAGCAATTCGGCATAAATTAATACCGACTCCT-----  
CAGAATTTGGTAACTTCAACTCCA-----  
TTAACAACGACTTTTGAATCTTTTTTTGGATTACACCCATTATCTCAAGTTTTGGATCGAACTAATCCATTGACACAAAT  
AGTTCATGGGAGAAAATTTGAGTTATTTGGGTCTGGGGGATTGACAGGGCGAACCGCTAGTTTTCGGATACGAGATATCC  
ATCCTAGTCACTACGGGCGTATTTGCCCAATTGACACATCTGAAGGAATCAATGTTGGGCTTATTGGGTCTTAGCAATT  
CATGCGAGAATTTGGTCTCT---TGGGGTCTCTAGAAAGCCCTTATTATGAA-----ATTTCT---GAGAGATCAAAA--  
-----AGGGTACAGATGCTTTATTTATCGCCAAGTAGG-----GATGAATACTAT-----  
ATGTTAGCGTCCGGAATTTCTTTGGCCCTGAATCAAGGT---ATTGAGGAAGAACAGGTTGTTCCA---  
GCTCGATATCGTCAAGAATTCCTGACTATTGCGTGGGAACAGGTTTCAATTTTCAAGTATCTTTTCTTCCAATATTTTTCT  
TATTGGAGCTTCTCTCATTCTTTTATCGAGCACAATGATGCAAATCGAGCTTTAATGAGTTCTAATATGCAACGTCAAG  
CAGTTCGCTTTTCTCAGTCCGAGAAGTGCATTGTTGGAACGGGGTTGGAACGCCAAGTGGCCCTAGATTCGGGGGTTCTC  
GCTATAGCCGAACATGAGGGAAAGATCATTATACCAACACTGACAAGATTGTTTTATTAGGGAATGGG---AAT-----  
-----ACT-----  
GTAAGCATTCCATTAGTTATGTATCAACGTTCCAACAAAAATACTTGTATGCATCAAAAACCTCAGATTCGCGGGGGG--  
-----  
AAATGTGTTAAAAGGGGCAAATTTTAGCAGATGGTGCCGCTACAGTTGGTGGTGAGCTAGCTTTGGGAAAAAACGTATT  
AGTAGCTTATATGCCGTGGGAAGGTTACAATTTTGAAGATGCGGTACTCATTAGTGAGCGTCTTGTGTATGAAGATATTT  
ATACTTCTTTTACATACGGAAATATGAAATTCAAACTTATGTGACAAGTCAAGGT---CCT---  
GAAAAGGTCACTAGCGAAATACCACATTTAGAAGCTCATTACTCCGCAATTTAGACAAAAATGGAATTGTGAGGTTGGG  
ATCATGGGTAGAAACAGGTGATATTTTGGTAGGTAAATTAACGCCTCAGATGGCAAAAAGAA---  
TCTTCGTATGCCCCGAAGATAGATTATTACGAGCTATACTTGGCATTGAGGTATCCACATCAAAGGAACTTGTCTAAA  
ACTACCTATAGGTGGTAGGGGCCGAGTTATTGATGTGCGATGGATCCAGAAA---  
AAGGGGGGTTCCAGTTATAATCCAGAAAACGATT---  
CATGTATATATTTACAAAAACGTGAAATCAAAGTAGGCGATAAAGTAGCTGGAAGACATGGAATAAGGGTATCATTTC  
CAGAATTTTGTCTTAGACAAGATATGCCATATTTGCAAGATGGAAGACCTGTTGATATGATCTTTAACCCTAGGAGTAC  
CTTACGAATGAATGTAGGACAGATATTTGAATGTTTCGCTCGGGTTAGCGGGGAGTCTGCTAGATAGACATTATCGAATA  
GCACCTTTTGTGAGAGATATGAGCAAGAGGCTTCGAGAAAACCTGGTGTCTTCTGAATTATATGAAGCCAGTAAGCAAAC  
AGCGAAT---  
CCGTGGGTATTTGAACCCGAGTATCCGGGAAAGAGTCAATATTTGATGGAAGAACGGGAGATCCTTTTGAACAACCCGT  
TATAATAGGAAATCCTTATATATTGAAATTAATTCATCAAGTTGATGATAAAATTCATGGACGTTCTAGTGGACATTATG  
CACTTGTACACAACAACCCCTTCGAGGAAGAGCCAAGCAAGGAGGACAGCGGGTAGGAGAAATGGAGGTTTGGGCTCTA  
GAAGGATTTGGTGTGCTCATATTTTACAAGAGATGCTTACTTATAAATCAGATCATATTAAGCTCGCCAGGAAGTACT  
TGGTACTACGATCATTGGGGGAACAATACCTAACCCCTGAA-----  
GATGCTCCAGAATCTTTTTCGACTGCTCGTCCGAGAACTACGATCTTTGGCTCTGGAACCTGAATCATTTCCTTGTATCT--  
----GAGAGGAATTC-----CAGATTAAT-----AGGATGGAAGCT-----

ATGATCGATCAGTAT-----  
AAACATCAACAACCTCCGAATTGGATCAGTTTTCTCTCAACAAATAAGTGCTTGGGCCACAAAAATCTACCTAATGGAGA  
GATAGTTGGAGAGGTGACAAAACCTTATACTTTTCATTAC-----  
AAAACCAATAAACCGAAAAAGATGGATTATTTTGCAGAAAGATTTTTGGGCCTATAAAAAAGTGAATTTGTGCTTGTGG  
AAATTAT-----CGAGTAATCGGAGATGAAAAAGAA---  
GACCCAAAATTTTGTGAACAATGCGGAGTCAATTTGTTGATTCTCGAATACGAAGGTATCAAATGGGCTATATTAAT  
GGCATGCCCGGTAACCTCACGTGTGGTATTTGAAACGTCTTCTAGTTATATCGCGAATTTTTTAGATAAACCTCTTAAAG  
AATTAGAGGGCCTAGTATACTGCGAT-----  
TTTTTCATTTGCTAGGCCTATAGCGAAAAACCTACT---TTTTTACGATTACGCGGT---TTATTCTGAATAT-----  
-GAAATCCAATCCTGGAAATACAGCATCCCCCTTTTTTTTACTACC-----  
CAAGGTTTTGATACATTTTCAAATAGAGAAATATCTACTGGAGCAGGTGCTATTTCGAGAACAATTAGCCGATTTGGATTT  
GCGTACTATTATAGATTATTTTATTTCGCAGAATGGAAAGAGTTAGGGGAA-----  
GAAGGG-----TCTACA-----GGA-----AATGAA-----TGGGAAGACCGAAAAAGTTGGA-----  
----

AGAAGAAAGGATTTTTTTAGTTAGACGCATGGAATTAGTTAAGCATTTTTATTTCGAACAAATATAGAACCAGAATGGATGGT  
TTTGTGTCTATT

*Triticum*

CTTTTTCTAGAAATATGGACTAATGGAAGTCTAACCCTAAGGAAGCACTTTATGAGGCTTCTCGTAATTTGATTGATTT  
ATTTCTTCTTTTCTACACGCGGAGGAA-----GAGGGCGCTAGT-----TTCGAAGAAAATAAA---  
AACAGGTTTACTCCACCCCTTTTTACTTTTTCAAAAAAGA-----TTAACT-----AATCTAAAG-----  
AAAAACAAAAAAGGAATTCCATTGAATTGTATTTTTATTGATCAATTAGAATTGACTTCTAGAACGTATAATTGTCTAAA  
AAGGGCCAATATACATACACTATTGGACCTTTTGGAGTAAGACTGAAGAAGATCTTCTGAGAATTGACAGTTTTCGTATGG  
AAGATAGAAAACATATATGGGACACTCTA-----GAGAAGCATCTCCCA---ATTGAT-----  
-----

-----ATGCTCCGGAAT---GGA---  
AACGAGGGAATGTCCACAATACCCGGATTTAGTCAGATCCAATTCGAGGGATTTTGTAGGTTTATTAAATCAAGCCTTGGC  
AGAAGAACCTTGACAAGTTTCCAACAATTA---  
GTCCAGATCACGAAATTCATTTCAATTTTTCGAAAGGATATCAATTGCTAGAACCTCGATAAAAAGAAAGAGATGC  
TGTGTATGAATCACTC---ACCTATTCTTCCGAATTATATGTATCTGCGAGATTAATTTTT-----  
GGTTTTCGATGTGCAAAAGCAAACCAATTTCTATCGGAAACATTCTATAATGAATTCCTTAGGAACCTTTATTATAAATGG  
AATATACCGAATTGTGATCAATCAAATATTGCTAAGTCTGGTATTTACTACCGCTCGGAATTAGATCAT---AAGGGA-  
--ATTCT---

ATCTACACTGGGACTATAATATCAGATTGGGGAGGGAGATCGGAATTAGCAATTGATAAAAAAGAAAGGATATGGGCTCG  
CGTGAGTAGAAAACAAAAGATATCTATTCTAGTTCTATCATCAGCTATGGGTTCTGAATCTAAGAGAAATTCTAGATAATG  
TTTCTACCCTGAAATTTTCTTGTCTTTCCCGAATGCTAAGGAG-----  
AAGAAGAGGATTGAGTCAAAAGAAAAAGCTATTTTGGAGTTTTATCAACAATTT-----GCTTGTGTAGGTGGGGAC--  
-CTGGTATTT---

TCGGAGTCTTATGCGAGGAATTACAAAAGAAATTTTTTCAACAAAATGTGAATTAGGAAGGATTGGTCGACGAAATAT  
GAATCGGAGACTTAATCTTGATATACCTCAGAACAATACATTCTTGTACCACGAGATGTATTGGCCGCTACGGATCATT  
TGATTGGAATGAAATTTGGAACGGGTATACTTGACGATGACGATATGAATCACTTGAAAAATAACGTATTCGTTCCGTT  
GCGGATCTGTTACAAGATCAATTCGGATTGGCTCTTGGTCGTTTACAACATGCAGTTCAAAAAACTATTCGTAGAGTATT  
CATACGTCAATCGAAACCGACTCCC-----  
CAAATTTGGTAACCTCAACTTCAACTTCAATTTTATTAATAACTACTTATGAGACCTTTTTTGGCACATACCCGTTATC  
TCAAGTTTTTGATCAAACGAATCCATTGACACAACTGTTTATGGGCGAAAAGTGAAGTTGTTTAGGTCCTGGAGGGTTGA  
CGGGGAGAACCAGGATTTTTCGGAGCCGAGATATTCATCCGAGTCACTATGGGCGTATTTGTCCAATCGACACGTCTGAA  
GGAATCAATGTTGGACTTACTGGATCCTTAGCAATTCATGCGAGAATTGATCACTTGTGGGATCCATAGAGAGTCCGTT  
TTATGAA-----ATATCTGCTGAGAAAGCAAAAGAAAAAAGAGAGACAGGTGGTTTTATCTATCACCAAAATAGA-----  
--GATGAATATTAT-----ATGATAGCAGCAGGAAATCTTTGTCTTGAATCAAGGT---

ATTCAGGAAGAACAGGTTGTTCCG---  
GCTAGATACCGTCAAGAATTCTTGACTATTGCATGGGAACAGATTGATGTTAGAAGTATTTTTCTTTCCAATATTTTTCT  
TATTGGGGGTTCTCTCATTCTTTTATTGAGCACAATGATGCGAATCGGGCTTTAATGAGTTCTAATATGCAGCGCCAAG  
CAGTTCCGCTTTCTCGGTCCGAGAAATGCATTGTTGGAACCTGGATTGGAACGCCAAACAGCTCTAGATTCGAGGGTTTCC  
ATTATAGCCGAACGCGAGGGAAAGATCATTCTACTGATAGTCATAAGATACTTTTATCAAGTAGTGGG---AAG-----  
-----ACT-----

ATAAGTATTCCTTTAGTTAACCACCGTCGCTCTAACAATAACTTGTATGCACCAAAAACCTCGGGTTCCACGGGGT--  
-----  
AAATCCATTAAAAAAGGACAAATTTTAGCAGAAGGAGCTGCTACAGTTGGGGGCGAATTTGCTTTAGGAAAAACGTATT

AGTAGCTTATATGCCATGGGAAGGTTACAATTTTGAAGACGCAGTACTAATTAGCGAACGTTTGGTATATGAAGATATTT  
ATACCTCTTTTTACATCCGGAAATATGAAATTCAGACGGATACGACAAGCCAGGGCTCCGCT---  
GAAAAAATCACTAAAGAAATACCACATCTAGAAGAACATTTACTCCGCAATTTGGACAGAAATGGAGTTGTTAGGTTGGG  
ATCCTGGGTAGAACTGGTATATTTTAGTAGGTAATTAACGCCTCAGATAGCGAGCGAA---  
TCATCTTATATCGCGGAAGCTGGATTATTACGGGCCATATTTGGCCTTGAGGTTTCCACTTCAAAGAAACTTCTCTGAA  
ATTACCTATAGGTGGAAGAGGGCGCGTTATCGATGTGAAATGGATCCAAAGG---GAGCGGGTC-----  
GACATAATGGTTTCGTGTATATATTTTACAGAAACGTGAAATCAAAGTTGGGGATAAAGTAGCCGGAAGACATGGGAATAA  
AGGGATCATTTCAAAATTTTGCCTAGGCAAGATATGCCCTATTTGCAAGATGGAACACCCGTTGATATGGTCTTCAATC  
CCTTAGGAGTACCCTCCCGAATGAATGTGGGACAAATATTTGAAAGCTCACTCGGATTAGCGGGGGATCTGCTAAAGAAA  
CATTATAGAATAGCACCTTTGATGAGAGATATGAGCAAGAGGCTTCAAGAAAACTTGTGTTTTTTCAGAATTATATGAAGC  
CAGTAAAGAAAACAAAAAT---  
CCATGGGTATTTGAACCCGAGTACCCGGGAAAAAGCAGAATATTTGATGGAAGAACAGGCGACCCCTTTGAGCAACCTGT  
TCTAATAGGGAAGTCTATATCTTAAAATTAATTCATCAAGTTGATGAGAAAATTCATGGGCGTTCTACTGGGCCCTACT  
CACTTGTTACACAACAACCGGTTAGAGGAAGAGCCAAGCAAGGGGGACAACGAGTAGGAGAAATGGAAGTTTGGGCTTTA  
GAAGGATTTGGTGTGCTCATATTTTACAAGAGATACTTACTTATAAATCTGACCATCTTATAGCTCGCCAAGAAACT  
TAATGCTACGATCTGGGGAAAAAGAATACCTAATCATGAG-----  
GATCCTCCAGAATCTTTTCGAGTGTCTGTTTCGAGAACTACGATCTTTGGCTCTAGAACTGAATCATTTTCTTGTATCT--  
----GAAAAGAACTTC-----CAGGTTAAT-----AGGGAGGAAGTT-----  
ATGATTGACCAATAT-----  
AAACATCAACAACCTTCAAATTTGGACTCGTTTTCCCTCAACAAATAAAGGCTTGGGCTAACAAAAACCTACCTAATGGAGA  
AGTCGTTGGCGAAGTCACAAGGCCCTCTACTTTTCATTAT-----  
AAAACCGATAAACCAGAAAAAGATGGATTGTTTTGCGAAAGAATCTTTGGACCCATAAAAAGCGGGATTTGCGCTTGTGG  
CAATTCT-----CGAGCGAGCGGAGCTGAAAACGAA---  
GACGAAAGATTTTGCAAAAATGCGGGGTAGAATTTGTGGATTCTCGGATACGAAGATATCAAATGGGATACATCAAACCT  
CGCATGTCCCGTGACTCATGTGTGGTATTTGAAAGGTCTTCCCTAGTTATATCGCGAATCTTTTAGATAAACCTCTTAAGA  
AGTTGGAGGGCCTAGTATACGGCGAT-----  
TTCTCTTTTGTAGGCCCAGCACTAAAAAACCCACT---TTTTACGATTACGAGGT---TTATTGGAAGAG-----  
-GAAATTGCATCTGTAAACCACAGCATTTCTCCCTTTTTTCTACC-----  
CCAGGCTTTGCAACATTTGAAATCGGAAATTCGACAGGAGGAGTGTCTATTAGAGAACAATTAGCAGATTTGGATTT  
GCGAATTATTATAGAGAATTTCTTTGGTCAATGGAAGGAATTAGAAGAC-----  
GAGGGG-----TATAGT-----GGA-----GATGAG-----TGGGAAGATAGAAAAAGACGA-----  
-----  
ATAAGAAAAGTTTTTTTTGATTAGACGCATGCAATTTGGCGAAACATTTTATTCAAACAAATGTAGAACCAGAATGGATGGT  
TTTGTGCTTATT  
Typha  
CTATTTCTAGAAATATGGACAAATGGAAGTTAACTCCTAAGGAAGCACTTTATGAGGCTTCTCGTAATTTGATTGATTT  
ATTTATTCCTTTTCTACATGCAGAGGAA-----GAGGACATTAAT-----TTCGAAGAAAATAAA---  
AACAGGTTTACTCTACCCTTTTTAACCTTTCAAGATAGA-----TTAACT-----AATCTAAAG-----  
AAAAACAAAAAAGGAATTCATTGAATTGCATTTTTATTGACCAATTAGAATTGCCTTCTAGGACCTATAATTGTCTCAA  
AAGGTCCAATATACATACATTATTGGACCTTTTGGAGTAATGGTCAAGAAGATCTTATGAGAATTGAATATCTTCGCATGG  
AAGATGTA AACAGATATTGGACACTCTA-----CAGAAGAATTTGCGA---ATTGATTTACCTAAGAATAAG-----  
---TTC---TCATT-----  
-----ATGCTCCGGAAT---GGA---  
AATGAGGGAATGTCCACAATACCTGGATTTAGTCAGATACAATTTGAGGGATTTTGTAGGTTTATTAAATCAAGGCTTGAC  
GGCAGAATTTTCAAAGTTTCCAAAAATTGAA-----  
GATACAGATCAAGAAATTTGAATTTAAATTTTGTGGAAAGATATCAATTTGGTAGAACCTTTGATAAAAAGAAAGAGATGC  
TGTGTATGAATCACTC---ACATATTTCTCAGAATTATATGTACCCGCGGGATTAATTTGGAAAACC-----  
GGTAGAGATATGCAAGAACAACCGTTTTTTATTGAAACATTCCTCTAATGAATTCCTGGGAACCTCTATAGTAAATGG  
AATATACAGAATTGTGATCAATCAAATATTGCAAAGTCCCGGTATTTACTACCGTTTCGGAATTGGACCAT---AACGGA-  
--ATTTCT---  
GTTTATACGAGCACTATAATATCAGATTGGGGAGGAAGATCGGAATTAGAAATTTGATAGAAAAGCAAGGATATGGGCCCG  
TGTGAGTAGGAAACAAAAAATATCTATTCTAGTTCTATCATCAGCTATGGGTTTCGAATCTAAGAGAAATTTCTAGATAATG  
TTTGTACCCTGAAATTTTCTTATCTTTCCCGAATGATAAGGAG-----  
AAAAAAAAGATTGGGTCAAAGAAAATGCTATTTTGGAGTTTTATCAACAATTT-----GCTTGTGTAGGCGGGGAT--  
-CCGGTATTT---  
TCTGAGTCCTTATGTAAGGAATTACAAAAAAATTTTTTCAACAAAGATGCGAATTAGGAAGGATTGGTTCGACGAAATAT  
GAACCGGAGACTGAATCTTATATACCTCAGAACAATACATTTTTTGTACCACGAGATGTATTGGCTGCTGCGGATCATT

TGATCGGAATGAAATTTGGAATGGGTACACTTGACGAT-----  
ATGAATCATTGAAAAATAAGCGTATTCGTTCTGTAGCGGATCTGTTACAGGATCAGTTTGGACTGGCTCTTGCTCGTT  
AGAAAATGCAGTTCGAGGAAGTATATGTGGAGCAATCAGGCATAAATTGATACCGACTCT-----  
CAAAATTTGGTAACTTCAACTTCA-----  
TTAACAACACTACTTATGAATCGTTTTTTGGCCTACACCCTTTATCTCAAGTTTTGGATCGAACTAATCCATTGACACAAAT  
CGTTCATGGGCGAAAATTGAGTTATTTGGGTCCTGGAGGATTGACGGGGCGAACTGCCAGTTTTAGGATACGAGATATCC  
ATCCTAGCCACTATGGACGATTTGTCCAATTGACACGTCCGAAGGAATCAATGTTGGACTTATTGGATCCTTAGCTATT  
CATGTGAGGATTGGTCAT---TGGGGATCTATAGAGAGTCCGTTTTATGAA-----ATATCT---  
GAGAGATCAAAAGAAAA---GAGTCACAGATGGTTTTATTTATCACCAAATAGA-----GATGAATATTAT-----  
ATGGTAGCAGCAGGAAATCTTTAGCCTTGAATCGGGGT---ATTCAGGAAGAACAGGTTGTTCCA---  
GCTCGATAACCGTCAAGAATTCCTGACTATTGCATGGGAACAGATTATCTTAGAAGCATTTCCTTCCAATATTTTTCT  
TATTGGAGCTTCCCTCATTCTTTTTATTGAGCATAATGATGCGAATCGGGCTTTAATGAGTTCTAATATGCAGCGTCAAG  
CAGTTCCGCTTTCTCGTCCGAGAAAGTGCATTGTTGGAACGGGCTGGAACGCCAAACCGCTCTAGATTCCGGGGTTTTCT  
GTTATAGCCGAACATGCGGGAAAGATCATTATACTGATACTCACAAGATTATTTTATCAAGTAATGAG---AAC-----  
-----ACT-----  
ATAAGTATCCATTAGTTATGTATCAACGTTCCAACAAAAATACTTGTATGCATCAAAAACCTCAGGTTTGGCGGGGT--  
----  
AAATCCATTAAAAAAGGACAAATTTTAGCGGACGGTGCAGCTACGGTTGGTGGGGAACCTTGCTTTAGGAAAAACGTATT  
AGTAGCTTATATGCCATGGGAAGGTTACAATTCTGAAGACGCAGTACTAATTAGCGAACGGCTGGTATATGAAGATATTT  
ATACTTCTTTTACATCCGTAAATATGAAATTCAGACTCATGTGACAAGCCAAGGC---CCT---  
GAAAGAATCACTAAGGAAATACCGCATCTAGAGGCTCATTACTCCGCAATTTGGACAGAAATGGAATTGTGATGCTGGG  
ATCTTGGGTAGAAACAGGTGATATTTTAGTAGGTAAATTAACGCCTCAGACAGCGAACGAA---  
TCGTGATGATGCCCCGGAGGATAGATTATTACGAGCCATACTTGGCATTACAGGTATCCACTGCAAAAGAACTTCTCTAAA  
ACTACCTATAGGTGGAAGGGGTGCGGTTATTGATGTGAGATGGATCCAAAA---  
AAGGAGGGTTCCAGTTATAATTCAGAAATGATT---  
CGTGTATATATTTTACAGAAACGTGAAATCAAAGTAGGTGATAAAGTAGCTGGAAGACATGGGAATAAAGGTATCATTTC  
AAAAATTTTGCCTAGACAAGATATGCCCTATTTGCAAGACGGAACACCTGTTGATATGGTTTTCAACCCCTTAGGAGTAC  
CCTCACGAATGAATGTGGGACAAATATTTGAATGCTCGCTTGGGTTAGCAGGGGATCTGCTAAAGAGACATTATCGAATA  
GCACCCTTTGATGAGAGATATGAGCAAGAGGCTTCGAGAAAACCTAGTGTCTTCTGAGTTATATGAAGCCAGTAAGCAAC  
AAAAAT---  
CCATGGGTATTTGAACCCGAGTATCCGGGAAAAAGTAGAATATTTGATGGAAGAACAGGAGATCCTTTTGAACAGCCTGT  
TCTAATAGGAAAGTCTATATCCTAAAATTAATTCATCAAGTTGATGATAAAATCCATGGCCGTTCTAGTGGACATTACG  
CACTTGTACACAACAACCCCTTAGAGGAAGGGCTAAGCAAGGGGGACAACGAGTAGGAGAAATGGAAGTTTGGGCTCTA  
GAGGGATTTGGTGTGCTCATATTTTACAAGAGATGCTTACTTATAAATCTGATCATATTAGAGCTCGTCAAGAAGTACT  
TGGTGCTACGATCATTGGAGGAAGAGTAACCTAAGCCCGAA-----  
GATGCTCCGGAATCGTTTCGATTGCTCGTTCCGAGAACTACGATCTTTGGCTCTAGAAGTGAATCATTTCCTTGTATCT--  
----GAGAAGAAGTTC-----CAGATTAAT-----AGGAAGGAAGCT-----  
ATGATCGACCAGTAT-----  
AAACATCAACAACCTTCGAATTGGACCAGTTTCTCCTCAACAAATAAAGGCTTGGGCCAACAAAATCCTCCCTAATGGGGA  
GATAGTGGGAGAGGTGACAAAACCTATACTTTTCATTAT-----  
AAAACCAATAAACCAGAAAAAGATGGATTGTTTTGCGAAAGAATCTCTGGACCGATAAAAAGTGAATTTGTGCTTGTGG  
AAATTAT-----CGAGTGATCGGAGCTGAAAAAGAA---  
GACCCGAAATTTTGCGAACAATGCGGGGTAGAATTTGTTGATTCTCGGATACGAAGATATCAAATGGGATACATCAAAC  
CGCATGTCCCGTGACTCATGTGTGGTATTTGAAACGTCTTCCTAGTTATATCGCGAATCTTTTAGATAAACCCCTTAAG  
AATTAGAAGGCCTAGTATACTGCGATGTG-----  
TATCTCGATTTCTCTTTTGTAGGCCCATAGCTAAAAAACCTACT---TTCTTACGATTACGAGGT---  
TCATTGAAATAT-----GAAATCCAATCCCGGAAATACAGCATTCCACTTTTTTTTACTACC-----  
-----  
CCAGGCTTCGAGACATTTGCAAAATCGGGAAATCTCGACAGGAGCAGGTGCTATCAGAGAACAATTAGCTGATTGAGATTT  
GCGAATTATTATAGATAATTCATTGGTAGAATGGAAGGAATTAGGAGAC-----  
GAGGGG-----TCCACT-----GGA-----AACGAA-----TGGGAAGATCGAAAAATTAGA-----  
----  
CGAAGAAAGGATTTTTTGGTTCGACGCATGGAATTAGCTAAACATTTTATTGAAACAAATGTAGAACCAGAACGGATGGT  
TTTGTGCTTATT  
Vitis  
CTTTTTCTCGAAATATGGACAAATGGGAGTTAACTCCTAAAGAAGCACTTCATGAAGCCTCCCGTAATTTGATTGATTT  
ATTTATTCCTTTTCTACATGCGGAAGAA-----GAAACTTTACAT-----TTAGAGTACAATCAA---

CACAAGAGCACTTTACCCCTCTTACTTTTCATGATAGA-----TTGGCT-----AAACTAAGG-----  
AAAAACAAAAAAGAAATAGAATTGAAATATATTTTTATTGACCAATTAGAATTGCCTCCCAGGATCTATAATTGCCTCAA  
AAGGTCCAATATACATACATTATTAGACCTTTTGAATAAGAGTCAAAGGATCTTATGAAAATTGAAGATTTTCGCATAG  
AAGATGTA AACAGTTATTGGGCATTCTA-----GAAAAACATTTCCACA---ATTGAT-----  
-----  
-----ATGTTCCGGGGT---GGA---  
AATGAGGGAATGTCTACAATACCTGGGTTAATCAGATCCAATTTGAAGGATTTTGTAGGTTTATTGATCAGGGCTTGAC  
AGAAGA ACTTTATAAGTTTCCAAAAATTGAA-----  
GATACAGATCAAGAAATTGAATTTCAATTATTTGTGGAAACATATCAATTGGTGGAAACCATTGATAAAAAGAAAGAGATGC  
CGTGTATGAATCACTC---ACATATTCTTCTGAATTATATGTATCTGCGGGATTAATTTGGAAAACC-----  
AGCAGAGATATGCAAGAACAACAATTTTTATTGGAAACATTCCTCTAATGAATTCCTGGGAACTTCTATAGTAAATGG  
ACTATACAGAATTGTGATTAATCAAATATTGCAAAGCCCCGGCATTATTACC GGTCAGAATTGGACCAT---AACGGA-  
--ATTTTCG--  
GTCTATACCGGCACCATAGTCTCAGATTGGGGAGGAAGATTAGAATTAGAGATTGATAGAAAAGCAAGGATATGGGCTCG  
TGTGAGTAGGAAACAAAAATATCTATTCTAGTTCTATCATCAGCTATGGGTTCTGAATCTAAGAGAAATTCTAGAGAATG  
TTTGCTATCCTGAGATTTTTTTGTCTTTCCTGAATGATAAGGAG-----  
AAAAAAAATTGGGTCAAAGAAAGTGCCATTTTGGAGTTTTATCAACAATTT-----GCTTGTGTAGGTGGGGAT--  
-CCGGTATTT---  
TCTGAATCATTATGTAAGGAATTACAAAAGAAATTTCTTTCAACAAAGATGTGAATTAGGAAGGATTGGTCGACGAAATAT  
AAACCGGAGACTGAATCTTGATATACCTCAGAACAATACATTTTTGTTACC GCAAGATATATTGGCAGCTGCGGATCATT  
TGATTGGAATGAAATTTGGAATGGGTATACTTGACGAT-----  
ATGAATCATTGAAAAATAACGTATTCGTTCTGTAGCGGATCTCTTACAAGATCAATTCGGACTGGCTCTAATTCGTTT  
AGAAAACGTGGTTCGAGGA ACTATATGTGGAGCAATTAGGCATAAATTAATACCGACTCCT-----  
CAGAATTTGGTAACTTCAACTCCA-----  
GTAACA ACTACTTATGAATCTTTTTTCGGCTTACACCCATTATCTCAAGTTTTGGATCGAACTAATCCATTGACACAAAT  
AGTTCATGGGCGAAAAATCGAGTTATTTGGGCCCGGTGGATTGACAGGGCGAACTGCCAGTTTTCGGATACGAGATATCC  
ATCCTAGTCACTATGGACGCATTTGCCCAATTGACACGTCTGAAGGAATCAATGTTGGACTTATTGGATCCTTAGCAATT  
CACGCGAGGATTTGGTCAT---TGGGGATCTCTAGAAAGCCCATTTTTATGAA-----ATTTCT---GAGAGATCAAAA--  
-----AAGGTACGGATGCTTTTATTTATCACCAAGTAGA-----GATGAATACTAT-----  
ATGGTAGCGGCAGGAATTTCTTTGGCACTGAATCAGGGT---ATTGAGGAAGAACAGGTTGTTCCA---  
GCTCGATACCGTCAAGAATTCCTGACTATTGCGTGGGAACAGGTTTCATCTTCGAAGTATTTTTCTTTCCAATATTTTTTC  
TATTGGAGCTTCCCTCATTCTTTTATCGAGCATAATGATGCGAATCGGGCTTTAATGAGTTCTAATATGCAACGCCAAG  
CAGTTCGCTTTCTCGGTCCGAGAAGTGCATTGTTGGA ACTGGGTTGGAACGTCAAGCGGCTCTAGATTCAGGGGTTCC  
GTTATAGCCGAACACGAGGGAAAGATCGTTTATACCGATACTGACAAGATCATTTTATCAGGTAATGGA---GAT-----  
-----ACT-----  
CTAAGTATTCATTAGTTATGTATCAACGTTCCAACAAAAATACTTGTATGCATCAAAAAGCCAGGTTCCGGCGGGGT--  
-----  
AAATGCATTAAAAAGGGACAAATTTTAGCGGATGGGGCCGCTACAGTTGGCGGAGAACTAGCTTTGGGGAAAAACGTATT  
AGTGGCTTATATGCCATGGGAAGGTTACAATTCTGAAGATGCGGTACTCATTAGCGAGCGTCTGGTATATGGAGATATTT  
ATACTTCTTTTACATACGGAAATATGAAATTCAGACCCATGTGACAAGCCAAGGC---CCC---  
GAAAGGATCACTAACAAAATACCGCATTTAGAAGCACATTTACTCCGCAATTTAGACAAAAATGGAATTGTGATACTGGG  
ATCTTGGGTAGAGACGGGCGATATTTTAGTAGGTAATTAACGCCTCAGATGGCGAAAGAA---  
TCATCGTATGCCCCGGAAGATAGATTATTACGAGCCATACTGGCATTGAGGATCCACTTCAAAGGAACTTGCCTAAA  
ACTACCTATAGGTGGTTCGAGGTGAGATTATTGATGTGCGATGGATCCAGAAA---  
AAGGGTGGTTCTAGTTATAATCCAGAAAACGATT---  
CGTGTATATATTTACAGAAACGTGAAATCAAAGTAGGTGATAAAGTAGCTGGAAGACATGGAATAAGGGTATCATTTC  
CAAAATTTTGCCTAGACAAGATATGCCTTATTTGCAAGATGGAAGACCTGTTGATATGGTCTTTAACCATTAGGAGTAC  
CGTCACGAATGAATGTAGGACAGATATTTGAATGCTCGCTGGGGTTAGCGGGGGGTCTGCTAGACAGACATTATCGAATA  
GCACCTTTTGATGAGAAATATGAACAAGAGGCTTCGAGAAA ACTAGTGTCTTCTGAATTATATGAAGCCAGTAAGCAAAC  
AGCGAAT---  
CCATGGGTATTTGAACCCGAGTATCCGGGAAAAAGCAGAATATTTGATGGAAGAACGGGAGATCCTTTTGAACAACCTGT  
TATAATAGGAAAGCCTTATATCTTGAATTAATTCATCAAGTTGATGATAAAATCCATGGACGTTCCAGTGGACATTATG  
CACTTGTACACAACAACCCCTTAGAGGAAGGGCCAAGCAAGGGGGACAACGGGTAGGAGAAATGGAGGTTTGGGCTCTA  
GAGGGATTTGGAGTTGCTCATATTTTACAAGAGATGCTTACTTATAAATCTGATCATATTAGAGCTCGCCAGGAAGTACT  
TGGTACTACGATCATTGGAGGAACAATACCTAACCTGAG-----  
GATGCTCCAGAATCTTTTCGATTGCTCGTTCCGAGA ACTACGATCTTTGGCTCTAGAATTGAATCATTTCCTTGTATCT--  
----GAGAAGAACTTC-----CAGATTAAT-----AGGAAGGAAGCT-----



ATGATCGATCGGTAT-----  
AAACATCAACAACCTCCGAATTGGATCAGTTTTCCCCTCAACAAATAAGTGCTTGGGCCAATAAAAATCCTACCTAATGGAGA  
GATAATTGGAGAGGTTACAAAACCTATACTTTTCATTAC-----  
AAAACATAATAAACCGGAAAAAGATGGATTATTTTGTGAAAGAATTTTTGGCCCTATAAAAAGTGAATTTGTGCTTGTGG  
AAATTAT-----CGAGTAATCGGAGATGAAAAAGAC---  
GACCCAAAATTTTGTGAACAATGCGGAGTCTGAATTTGTTGATTCTCGGATACGAAGATATCAAATGGGCTACATCAAAC  
GGCATGCCAGTAACGCATGTGTGGTATTTGAAACGTCTTCTAGTTATATCGCAAATCTTTTAGATAAACCTCTTAAAG  
AATTAGAAGGCCTAGTATATTGCGAT-----  
TTTTCTTTTGTAGGCCCATAGAGAAAAACCTACT---TTCTTACGATTACGAGGT---TCATTCGAATAT-----  
-GAAATTC AATCTTGGAAATACAGCATCCCACTTTTTTTTACTACC-----  
CAAGGTTTCGATACATTTGAAATCGAGAAATCTCTACCGGAGCCGGTGTCTATACGAGAACAATTAGACGATCTGGATTT  
GCGAATTATTATAGATTATTCATTGGTGAATGGAAGAATTAGGGGAA-----  
GAAGGG-----CCACA-----GGT-----AATGAA-----TGGGAAGATCGAAAAATTGGA-----  
-----  
AGAAGAAAGGATTTTTTGGTTAGACGCATGGAATTAGCTAAGCATTTTTATTTCGAACAAATATAGAACCAGAATGGATGGT  
TTTGTGTCTATT  
Yucca  
CTTTTTCTAGAAATATGGACGAATGGAAGTTAACTCCTAAGGAAGCACTTTATGAAGCTTCTCGTAATTTGATTGATTT  
ATTTATTCTTTTCTACATGCGGAGGAA-----GGGGACATTCAT-----TTCGAGGAAAATAAA---  
AACAGGTTTACTCTACCCCTTTTTACCTTTCAAATAGA-----TTAACT-----AATCTAAAG-----  
AAAAACAAAAAAGGAATTCATTGAAATGTATTTTTATTGACCAATTAGAACTACCCCCAGGACCTATAATTGTCTCAA  
AAGGTCCAATATACATACATTATTGGACCTTTTGGCAACAGTCAAGAAGATCTTATGAGAATTGAATATTTTCGTACAG  
AAGATGTA AACAGATATTGGACACTCTA-----CAGAAGCATTTCGCA---ATCAATTTACCTAAGAATAAG-----  
---TTT---TCGTTT-----  
-----ATGCTCCGGAAT---GGA---  
AATGAAGGAATGTCCACAATACCTGGATTTAATCAGATACAATTTGAGGGATTTTGTAGGTTTATTAAATCAGGGCTTGGC  
GGAAGAATTTTATAAGTTTCCAAAAATTGAA-----  
GATAGAGATCAAGAAATGGAATTTCAATTTTGTGGAAAGATATCAATTTGGTAGAGCCCTGATAAAGGAAAGAGATGC  
TGTGTATGAATCACTC---ACATATTCTTCTGAATTATATGTCCCTGCGGGATTAATTTGGAAAACC-----  
GGTAGAGATATGCAACAAAAACCGTTTTTTATTGGAACCATTCTCTAATGAATTCCTGGGAACCTCTATAGTAAATGG  
AATATACAGAATTGTGATCAATCAAATATTGCAAAGTCCCGGTATTTACTATCGTTTCAAGATTGGACCAT---AACGGA-  
--AATTCT---  
GTTTATACCAGCACTATAATATCAGATTGGGGAGGAAGATCGGAATTAGAAATTGATAGAAGAACAAGGATATGGGCGCG  
TGTAAGTAGGAAACAAAAATATCTATTCTAGTTTTATCATCAGCTATGGGTTTCAAGTCTAAGAGAAATTCTAGATAATG  
TTTGTACCCTGAAATTTTCTTGTCTTTCTCGAATGATAAGGAG-----  
AAAAAAAAGATTGGATCAAAAGAAAATGCTATTTTGGAGTTTTATCAACAATTT-----GCTTGTGTAGGTGGGGAT--  
-CCGGTATTT---  
TCTGAGTCCTTATGTAAGGAATTACAAAAGAAATTTTTTCAACAAAGGTGTGAATTAGGAAGGATTGGTCGACGAAATAT  
GAACCGGAGACTGAATCTTGATATACCTCAGAACAATACATTTTTGTTACCGCGAGATCTATTGGCTGCTGCGGATCATT  
TGATCGGAATGAAATTTGGAATGGGTACACTTGACGAT-----  
ATGAATCACTTGAAAAATAACGTATTCGTTCTGTAGCAGATCTGTTACAAGATCAATTCGGATTGGCTCTTGTTCGTTT  
AGAAAATGCGATTTCGAGGAATATATGTGGAGCAATCAGGCATAAATTGATACCGACTCCT-----  
CAAAATTTGGTAACCTTCAACTTCA-----  
TTAACAATACTTATGAATCCTTTTTTGGCCTACACCCTTTATCTCAAGTTTTGGATCGAACTAATCCATTGACACAAAT  
CGTTTATGGGCGAAAATTTGAGTTATTTGGGTCTGGAGGATTGACGGGGCGAACTGCTAGTTTTCGGATACGAGATATTC  
ACCCGAGCCACTATGGACGTATTTGTCCAATTGACACGTCTGAAGGAATCAATGTTGGACTTATTGGATCCTTAGCTATT  
CATGTGAGGATTGGTCAT---TGGGGATCCATAGAGAGTCCGTTTTTATGAA-----ATATCT---GAGAGATCAAAA--  
-----AAAGCACAGATGATTTATTTATCACC AAATAGA-----GATGAATATTAT-----  
ATGGTAGCAGCAGGAAATCTTTGGCCTTGAATCGGGGT---ATTCAAGAAGAACAGGTTGTTCCG---  
GCTCGATACCGTCAAGAATTCTTACTATTGTCATGGGAACAGATTCAATTTTCAAGCATTTTTTCTTTCCAATATTTTTT  
TATTGGAGCTTCCCTCATTCTTTTATCGAGCATAATGATGCGAATCGGGCTTTAATGAGTTCTAATATGCAGCGCCAAG  
CAGTTCCTCTTTCTCGGTCCGAGAAGTGCATTGTTGGAACCTGGGCTGGAACGCCAAACGGCTCTAGATTCGGGGGTTTCC  
GTTATAGCCGAGCGCGAAGGAAAGATCATTTATACTGATACTCACAAGATCATTCTTCAAGTAATGGG---GAT-----  
-----ACT-----  
ATAAGTATTCCATTAGTTATGTATCAACGTTCCAACAAAAATACTTGTATGCATCAAAAACCCAGGTTTCAGCAGGGT--  
-----  
AAATGCATTAAAAAGGGACAAATTTTAGCGGATGGTGC GGCTACAGTTGGTGGGGAACCTCGCTTTAGGAAAAACGTATT

AGTAGCTTATATGCCATGGGAAGGTTACAATTCTGAAGACGCAGTACTAATTAGCGAACGTCTGGTATATGAAGATATTT  
ATACTTCCCTTTTACATACGGAAATATGAAATTCAGACTCATGTGACAAGCCAAGGT---CCC---  
GAAAGAATCACTAAGGAAATACCGCATTAGAGGCTCATTACTCCGAAATTTAGACAGAAATGGAATTGTGATGCTGGG  
ATCTTGGATAGAAGCCGGCGATATTTTAGTAGGTAATTAACGCCTCAGGCGGCGAACGAA---  
TCCTCGTATGCCCCGAGGATAGATTATTACGAGCCATACTTGGCATTCCAGGTATCCACTGCAAAAGAACTTCTCTAAA  
ACTACCTATAGGTGGAAGGGGTCGAGTTATTGATGTGAGATGGATCCAGAAA---  
AAGGGGGTCTAGTTATAATCCAGAAAGGATT---  
CGTGTATATATTTTACAGAAACGTGAAATCAAAGTGGGTGATAAAGTAGCTGGAAGACATGGGAATAAAGGTATCATTTC  
TAAAATTTTGTCTAGACAAGACATGCCCTACTTGAAGATGGAACACCAGTTGATATGGTCTTCAACCCATTAGGAGTAC  
CTTACGAATGAATGTGGGGCAGATATTTGAATGTTTCGCTTGGGTTAGCGGGGGATTGCTAAAGAGACATTATAGAATA  
GCACCCCTTGTGAAAGATATGAGCAAGAGGCTTCGAGAAAATTAGTGTCTTCTGAATTATATGAAGCCAGTAAGCAAAC  
AAAAAT---  
CCATGGGTATTTGAACCCGAGTATCCGGGAAAAAGCAAAATATTTGATGGAAGAACAGGGGATCCTTTTGAACAACCTGT  
TCTAATAGGCAAGTCTATATCCTAAAATTAATTCATCAAGTTGATGATAAAATCCATGGACGTTTCGAGTGGACATTACG  
CACTTGTACACAACAACCCCTTAGAGGAAGGGCCAAGCAGGGGGGACAACGAGTAGGAGAAATGGAAGTCTGGGCTCTA  
GAGGGATTTGGTGTGCTCATATTTTACAAGAGATGCTTACTTATAAATCTGATCATATTAGAGCTCGTCAAGAATTACT  
TGGTGTACGATTATTGGAGGAACAGTACCTAACCTGAA-----  
GATGCTCCAGAATCTTTTCGATTGCTCGTTCGAGAACTACGATCTTTGGCTCTGGAAGTGAATCATTTCCTTGTATCT--  
----GAGAAGAAGTTC-----CAGATTAAT-----AGGAAGGAA-----  
ATGAATCAGAATTTCTATTCTATGATCGACCGATAT-----  
AAACATCAACAACCTTCGAATTGGACCAGTGTCTCCTCAACAAATAAGGGCTTGGGCCAACAAAACCTACCCAATGGAGA  
GATAGTTGGAGAGGTGACAAAACCTATACTTTTCATTAT-----  
AAAACCAATAAACCGGAAAAAGATGGATTGTTTTGTGAAAGAATCTCTGGACCCATAAAAAGTGAATTTGTGCTTGTGG  
AAATTAT-----CGAGTGATCGGAGCTGAAAAAGAG---  
GACCCGAAATTTTGTGAAGAATGCGGGGTGGAATTTGTTGATTCTCGGATACGAAGATATCAAATGGGATACATCAAAC  
CGCATGTCCAGTAACTCATGTGTGGTATTTGAAACGTCTTCCGAGTTATATCGCGAATCTTTTAGATAAGCCCCTTAAG  
AATTAGAAGGCCTAGTATACTGCGATGTGTTTGATCGA---  
TATCTCAATTTTCTTTTGTAGGCCTGTGGCGAAAAGACCTACT---TTCTTACGATTACGAGGT---  
TTATTCGAGTAT-----GAAATCCAATCCTGGAAATACAGCATCCCACCTTTTTTTTACTACC-----  
-----  
CAAGGCTTTGAGACATTTGCAAAATCGGGAAATCTCTACAGGAGCAAGTGCTATCAGAGAACAATTAGCCGATTTGGATTT  
GCGAATTATTATAGATAATTCATTGGTAGAATGGAAGGAATTAGGAGAT-----  
GAGGAG-----TCCGCT-----GGA-----AATGAA-----TGGGAAGATAGAAAAATTCGA-----  
-----  
AGAAGAAAGGATTTTTTGGTTAGACGCATGGAATTAGCTAAACATTTTATTTCGAACAAATGTAGAACCAGAATGGATGGT  
TCTGTGCCTATT  
Zea  
CTTTTTTTAGAAATATGGACGAATGGAAGTTAACTCCTAAAGAAGCGCTTTATGAAGCTTCTCGTAATTTGATTGATTT  
ATTTCTTCTTTTCTACACACAGAGGAA-----GAGGGCACTAGT-----TTCGAAGAAAATAAA---  
AACAGGTTAACTCCACCCCTTTTAACTTTCAAAAAAGA-----TTCCT-----AATCTAAAG-----  
AAAAACAAAAAAGGAATTCATTGAATTGATTTTTTATTGATCAATTAGAATTGCCTTCTAGAACGTATAATTGTCTCAA  
AAGGGCCAATATACATACACTATTGGACCTTTTGGTAAGACTGAAGAAGATCTTATGCAAATTAATAGTTTTTCGTATGG  
AAGATGGAAAACCTGATATGGGACACTCTA-----GAGAAGCATCTCCCA---ATTGAT-----  
-----  
-----ATGCTCCGGAAT---GGA---  
AATGAGGGAATGTCCACAATACCCGGATTTAGTCAGATCCAATTCGAGGGATTTGTAGATTCATTAATCAAGGCTTGGC  
GGAAGAAGTGGAGAAGTTTCCACAATTTAA-----  
GATCCAGATCACGAAATTCATTTCAATTTTTCGAAAGGATATCAATTGCTAGAACCTCGATAAAAAGAAAGGAATGC  
TGTGTATGAATCACTC---ACCTATTCTTCCGAATTATATGTATCCGCGAGATTAATTTTT-----  
GGTTTTCGATGTGCAAAAGGAAACCTTTCTATTGGAAACATTCCTATAATGAATTCCTTAGGAACCTTTATAATAAATGG  
AATATACCGAATTGTGATCAATCAAATATTGCTAAGTCTGGTATTTACTACCGCTCGGAATTAGACCAT---AAGGGA-  
--ATTTCT---  
ATATATACCGGGACTATAATATCAGATTGGGGAGGAAGGTGCGAATTAGCAATTGATAAAAAAGAAAGGATATGGGCTCG  
CGTGAGTAGAAAACAAAAGATATCTATTTTAGTTCTATCATCAGCTATGGGTTGCAATCTAAGAGAAATTTTAGATAATG  
TTTCTACCCCGAAATTTTCTTGTCTTTCCCGAATGCTAAGGAG-----  
AAGAAGAGGATTGAGTCAAAAGAAAAGCTATTTTGGAGTTTTATCAACAATTT-----GCTTGTGTAGGTGGGGAC--  
-CTGGTATTT---

TCGGAGTCTTTATGCGAGGAATTACAAAAGAAATTTTTTCAACAAAAATGTGAATTAGGAAGAGTTGGTCGACGAAATAT  
GAATCGGAGACTGAATCTTGATATCCCTCAGAACAATACATTCTTGTTACCACGAGATGTATTGGCCGCTACGGATCATT  
TGATTGGAATGAAATTTGGAACGGGTATACTTGACGATGACGATATGAATCACTTGAAAAATAAACGTATTCGTTTCGGTT  
GCAGATCTGTTACAAGATCAATTCGGACTGGCTCTTGCCGTTTACAACATGCGGTTCAAAAACTATCCGTAGAGTATT  
CATACGTCAATCGAAACCGACTCCA-----  
CAAACCTTTGGTAACTCCAACCTTCAACTTCGATTTTTATTAATAACTACTTATGAGACCTTTTTTGGCACATACCCCTTAGC  
TCAAGTTTTTGATCAAACCAATCCATTGACACAAACGGTTCATGGGCGAAAAGTGAGTTGTTTGGGTCCAGGAGGATTGA  
CGGGGAGAACTGCAAGTTTTTCGGAGCCGAGATATTCATCCGAGTCACTATGGGCGTATTTGTCCAATTGACACGTCCGAA  
GGAATCAATGTTGGACTTACCGGATCGTTAGCTATTCATGCGAGAATTGATCACTGGTGGGGATCTATAGAGAGTCCGTT  
TTATGAA-----ATATCT---GAGAAAGCAAAAAGAAAAAAGAGAGACAGGTAGTTTTATTTATCACCAAATAGA----  
--GATGAATATTAT-----ATGATAGCAGCAGGAAATCTTTGTCTTGAATCAGGGT---  
ATTGAGGAAGAACAGGTTGTTCCA---  
GCTAGATACCGTCAAGAATTCCTGACTATTGCATGGGAACAGATTGATGTTAGAAGTATTTTTCTTTCCAATATTTTTCT  
TATTGGAGGTTCTCTCATTCTTTTATTGAGCATAATGATGCGAATCGGGCTTTAATGAGTTCTAATATGCAGCGCCAAG  
CAGTTCCACTTTCTCGGTCCGAGAAGTGCATTGTTGGAACGGATTGGAACGCCAAACAGCTCTAGATTCGAGGGTTTCC  
GTTATAGCCCAACGCGAGGGAAAGATCATTCTAGTGATAGTCACAAGATCCTTTTATCAAGTAGTGGG---AAG-----  
-----ACC-----  
ATAAGTATTCCTTTAGTTGCCCATCGGCGCTCTAACAAAAATACTTGTATGCACCAAAAAACCTCGGGTTCGCGGGGT--  
----  
AAATCCATTAAAAAGGGCAAATTTTAGCGGAGGGAGCAGCTACAGTTGGCGGGGAACCTTGCTTTAGGAAAAACGTTTT  
AGTAGCTTATATGCCCTGGGAGGGTTACAATTTGAAGACGCAGTACTAATTAGTGAACGTTTGGTATATGAGGATATTT  
ATACTTCTTTTACATCCGAAAATATGAAATTCAGACGGATACGACAAGCCAAGGCTCCGCT---  
GAAAAAATCACTAAACAAATACCACATCTAGAAGAACATTTACTTCGCAATTTGGACAGAAATGGAGTTGTAAGGTTGGG  
ATCCTGGGTAGAACTGGCGATATTTTAGTAGGTAATTAACGCCTCAGATAGCGAGCGAA---  
TCGTCCTATATCGCGGAAGCTGGATTATTACGGGCTATTTTTGGTCTTGAGGTATCCACTTCAAAGAACTTCTCTCAA  
ACTACCTATAGGTGGAAGAGGGCGCGTTATCGATGTGAAATGGATCCAGAGG---GAAGGGGT-----  
GACATAATGGTTCGTGTATATATTTTACAGAAACGTGAAATCAAAGTTGGGGATAAAGTAGCTGGAAGACACGGGAATAA  
GGGGATCATTTCAAAAATTTGCCTAGGCAAGATATGCCCTATTTGCAAGATGGAGCACCTGTTGATATGGTCTTCAATC  
CCTTAGGAGTACCCTCAGCAATGAATGTGGGACAAATATTTGAAAGCTCGCTCGGATTAGCAGGGGATCTGCTAAAGAAA  
CATTATAGAATAGCACCCCTTTGATGAGAGATATGAGCAAGAGGCTTCAAGAAAACTTGTGTTTTCGGAATTATATGAAGC  
CAGTAAACAAACAAAAAAT---  
CCATGGGTATTTGAACCCGAGTACCCGGGAAAAAGCAGAATATTTGATGGAAGAACAGGAGATCCCTTCAACAGCCTGT  
TCTAATAGGGAAGTCTTATATCTTAAAATTAATTCATCAAGTTGATGAGAAAATTCATGGACGTTCTACTGGGCCCTACT  
CACTTGTTACCCAACAACCCGTTAGAGGAAGAGCCAAGCAAGGGGGACAACGAATAGGAGAAATGGAAGTTTGGGCTTTA  
GAAGGATTTGGTGTGCTCATATTTTACAAGAGATACTTACTTATAAATCTGATCATCTTATAGCTCGCCAAGAAATACT  
TAATGCTACGATCTGGGGAAAAAGAATGCCTAATCACGAG-----  
GATCCGCCAGAATCTTTTCGAGTCTCGTTCGAGAACTACGATCTTTGGCTCTAGAACTGAACCATTTCTTGTATCT--  
----GAGAAGAACTTC-----CAGGTTAAT-----AGGGAGGATGTT-----  
ATGATTGACCAATAT-----  
AAACATAAACAACCTTCAAATTTGGACTCGTTTTCCCTCAACAAATAAAGGCTTGGGCTAAAAAATCCTACCTAATGGGGA  
AGTCGTTGGCGAAGTCACAAGGCCCTCCACTTTTCATTAT-----  
AAAACCGATAAACCAGAAAAAGATGGATTGTTTTGCGAAAGAATCTTTGGACCCATAAAAAGCGGAATTTGTGCTTGTGG  
AAACTCT-----CGAGCGAGCGTACGTGAAAACGAA---  
GACGAAAGATTTTGCCAAAAATGCGGGGTAGAATTTGTTGATTCTCGGATACGAAGATATCAAATGGGATACATCAAAC  
AGCATGTCCAGTGACTCATGTGTGGTATTTGAAAGGTCTTCCTAGTTATATTGCGAATCTTTTAGATAAACCCCTTAAGA  
AATTGGAGGGCCTAGTATATGGTGTAT-----  
TTCTCTTTTGCTAGGCCAGCGCTAAAAACCTACT---TTCTTACGATTACGGGGT---TTATTGGAAGAT-----  
-GAAATTTTCACTCTGTAACCACAGTATTTCTCCCTTTTTTTCTACC-----  
CCAGGCTTTGCAACATTTGCAAAATCGGGAAATGCAACAGGAGCAGGCGCTATTAGAGAACAATTAGCAGATTTAGATTT  
GCGAATTATTATAGAGAATTTCTTTGGTTGAATGGAAGGAATTAGAAGAC-----  
GAGGGG-----TATAGT-----GGA-----GATGAA-----TGGGAAGATAGAAAAAGACGA-----  
-----  
ATAAGAAAAGTTTTTTTTGATTAGACGCATGCAATTGGCGAAACATTTTATTCAAACAAATGTAGAACCAGAATGGATGGT  
TTTGTGCTTATT

Acorus ACCAGTTCCTCCCGAGTTGAGACCAATTATTCAGATAGATGGGGGTAAACTAATGAGTTCG--

-

GATATTAATGAACCTCTATAGAAGAGTTATCTATCGGAACAATACTCTTACCGATCTATTAATAAACAAGTAGATCTACGCC  
AGGGGAATTAGTAATGTGTGTCAGGAGAAATTGGTGCAAGAAGCCGTAGATACTTCTTGATAATGGAATCCGCGGACAAC  
CAATGAGGGATGGCCATAATAAAGTGTACAAGTCATTTTCAGATGTAATTGAAGGCAAGGAGGGGAGATTTTCGTGAGACT  
TTACTTGGTAAACGGGTCGATTATTCGGGTCGTTCCGTCATTGTCGTAGGCCCTTCACCTTCATTACATCGATGCGGATT  
ACCTCGAGAAATAGCAATAGAGCTTTTCCAGACATTTGTAATTCGCGGTCTAATCAGACAACATCTTGCTTCTAACATAG  
GAATTGCTAAAAGCAAAATTCGGGAAAAAGAACCGATCGTATGGGAAATACTTCAAGAAGTTATGCAGGGACATCCTGTA  
TTGCTAAATAGAGCGCCACCCTGCATAGATTAGGCATACAGGCGTTCCAACCCGTTTTAGTGGAGGGACGTGCTATTTG  
TTTACATCCATTAGTTTGTAAAGGATTCAATGCAGATTTTGATGGAGATCAAATGGCTGTTTCATGTACCTTTATCTTTGG  
AAGCTCAAGCAGAGGCTCGTTTACTTATGTTTTCTCATATGAATCTCTTGTACCAGCTATTGGAGATCCCATTTCTGTA  
CCAACTCAAGATATGCTTATTGGCCTCTATGTATTAACGATGGGGAATCGTCGAGGTATTTTGTAAATAGGTATAATCC  
ATGT-----AATCGC-----AGAAAT-----TATCAAATAAAA---ACAGTT---GACAAT-----  
-----AATAAC-----  
TATAAACATACGAAAGAGAAAAAACCCATTTTTTTGAGTTCCTATGATGCACCTTGAGCTTATCAGCAGAAACGAATCAA  
TTTACATAGTCCTTTGTGGCTC-----CGGTGG---CGACTA-----GATCAACGTGTCATTGGTTCA-----  
AGAGAAGTTCCTATCGAAGTTC AATATGAATCTTTGGGTACCTATCAGGAGATTTATGGGCACTATCTAATAGTAAGAAG  
TGTAATAAAGAAATACTTTGTATATACATTCGAACCACTGTTGGTCATATTTCTTTTTATCGAGAAATAGAAGAATCCG  
TACAAGGGTTTTGTGCGAGCCTACTCATATGGTACC-----  
-----ATGGAGGTA-----CTTATGGCAGAA---CGGGCCGATCTGGTCTAT---  
-----  
CACAATAAAGCGATAGATGGAAC TGCCATGAAACGACTTATTAGCAGATTAATAGATCACTTCGGAATGGCATATACATC  
ACACATCCTGGATCAAGTAAAGACTCTGGGTTTTCGGCAAGCCACTGCTACATCTATTTTCATTAGGAATTGATGATCTTT  
TAACAATACCTTCTAAAGGATGGCTAGTCCAAGATGCTGAACAACAAAGTTTTATTTTGGAGAAACACCATTCTTATGGA  
AATGTACACGCGGTAGAAAAATTACGTCAATCCATTGAGATATGGTATGCTACAAGTGAATATTTGAGACAAGAAATGAA  
TCCTAATTTTCGGATGACTGATCCTTCTAATCCAGTCCATATAATGTCCTTTTCGGGAGCTAGAGGAAATGCATCTCAGG  
TGCACCAATTAGTAGGTATGAGAGGACTAATGTCGGATCCCCAGGGACAAATGATTGATTTACCCATCCAAAGCAATTTA  
CGTGAAGGACTTTCTTTAACCGAATATATAATTTCTGCTACGGAGCCCGCAAAGGAGTTGTAGATACTGCTGTACGAAC  
ATCAGATGCCGGATACCTCACTCGTAGACTTGTGTAAGTAGTTCAACACATTGTTGTACGCAGAACAGATTGTGGCCTA  
TCCGAGGTATTTCTGTGCAACCTCGA-----AACGGG-----  
-----ATGACGGAAAGGATGTTTTTTCAAACA-----  
CTAATCGGTCGTGTATTAGCAGACGATGTATATATAGGTCTACGATGCATTGCCGCTCGAAATCAAGATATTGGGATTGG  
ACTTGTCAATCGATT CATAACC-----  
TTTTCGAGCACAACCAGTATATATTCGAACTCCCTTTACTTGTAGGAGTACCTCTTGGATCTGTCAATTATGTTATGGCCG  
GAGTCCTACT-----  
CACGGCGACCTGGTTCGAATTGGGGGAAGCGGTAGGTATTATTGCGGGACAATCAATTGGGGAAACCGGGGACTCAACTAAC  
ATTAAGAACCTTTCTACTGGTGGAGTATTCACAGGGGTA CTGCAGAACATGTACGAGCTCCTTCTAATGGAAAAATAA  
AATTCAAT-----  
GAGGAGTTGGTTCATCCACACGTACACGTACCGGACATCCTGCTTTTCTATGTTCTATAGACCTGTATGTA ACTGTTGA  
GGGTCGGGATATTATACATAATGTCAATATTCACCAAAAAAGTTTTGATTTTAGTTCAAATGATCAATATGTAGAATCAG  
ACAAGTGATTGCCGAGATTTCGCGCCGGAACATCCACTTTTAAT-----  
TTTAAAGAGAGGGTCCAGAAACATATTTATTCCGAATCAGCGGGAGAAATGC ACTGGAGTACCGATGTC-----  
TATCAT-----  
GCACCTGAATATACATATGGTAATGTTTCATCTATTACCAAAAACAAGTCATTTATGGATATTATCCGGAGGGCCA-----  
-TACAGATCCAGT-----ATAGTGTCTTCGTCGCTCCACAAGGATCAAGATCAAACGAATGCTCATTCTTTT-----  
TCTGTT---GAACGGCGATATATTTCT-----GACCTC-----TCAATGACTAATGGTCTGA-----  
-----  
-----GTGAGACACAAATTATTTAGTTCGGATCTT---TCTGGTAAA-----  
-AGGGGGGATAGGATT-----CTT-----GATTAT---TCA---AGACCC-----GATCAAATCATATCCAAG-  
-----GGTCATTGGAATTTTATATACCCTTCTATTCTCCACGAGAATTCAGAT-----  
TTCTTAGCGAAGAGGGCGAAAAATAGATT CATCATCCCGTTCCAA-----TATGATCAAGAA-----  
GGGGAGAAAGAACTAATA---CCGCATTCT-----  
GGTATTTTCGATCGAAATACCCATAAACGGTATGTTGCGTAGAAATAGTATTCTTGCTTATTTTGGACGATACACGATACAG  
AAGA-----AGCAGTTCGGGAATT-----  
-----  
-----  
-----

-----  
-----ACTAAATACGGGACCGTAGAGATAGATTCA-----  
-----  
ATCGTTAAAAAAGAGGATTTT---ATTGAGTATCGAGGAACAAAAGAATTTAGTTTCGAAATAC-----  
CAAATGAAAGTAGATCGATTTTTTTTTTTCATTCCCGAAGAAGTGCATATCTTACCTGGATCTTCGTCC---  
ATAATGGTCCGGAACAACAGTCTCATCGGAGTAGACACACGAATCACTTTAAATATA-----  
AGAAGCCGAGTGGGTGGATTGGTTCGAGTGGAGAGAAAAAAAAAAAAATATT---  
GAACTCAAAATTGTTTCTGGAGATATCCATTTTCTGGAGAGACAGATAAG-----  
ATATCCAGGCACAGCGGTATCTTGATA-----CCGCCAGGAACGGAAAAAAAA---AAC-----  
TCTAAGGAATCAAAA---ACAAAATTG-----AAAAATTGGATCTATGTCCAGCGG-----ATCACGCCTACTAAG--  
-----

Amborella ACCAGTTCTTCCCTCCCGAGTTGAGGCCAATCATTTCAGATAGATGGGGGTAAACCAATGAGTTCG--  
-

GATATTAATGAACTCTATAGAAGAGTTATCTATCGGAATAATACTCTTATTGATCCATTAACAACAAGTAGATCTACGCC  
AGGGGAATCAGTGTGTGTGTCAGGAAAAATTAGTACAAGAAGCCGTAGATACACTTCTTGATAATGGGATCCGCGGACAAC  
CAATGAGGGACGGTCCACAATAAAGTTTACAAGTCTTTTTTCAGATGTAATTGAAGGCAAAGAGGGGAAGATTTTCGCGAGACT  
CTACTTGGTAAACGGGTCGATTATTCGGGTCGTTCTGTTCATTGTGGTGGGCCCTTCGCTTTTCATTACATCGATGTGGATT  
ACCCCGAGAAATAGCAATAGAGCTCTTTCAGACATTTGTAATTCGTGGTCTAATCAGACAACATGTTGCTTCCAACATAG  
GGATTGCTAAAAGTAAAATTTCGGGAAAAAGAACCAATTGTATGGGAAATACTTCAAAAGGTTATGGAAGGACATCCTGTA  
TTGTTGAATAGAGCACCTACTTTGCATAGATTAGGCATACAGGCGTTCCAACCTATTCTAGTGGAGGGACGTGCTATTTG  
TTTACATCCATTAGTTTCGTAAGGGATTCAATGCAGACTTCGATGGGGATCAGATGGCTGTTTCATGTACCTTTGTCTTTGG  
AAGCTCAAGCGGAAGCCCGTTTACTTATGTTTTCTCATATGAATCTCTTGTCTCCGGCTATTGGAGATCCTATTTCTGTA  
CCAACCTCAAGATATGCTTATTGGCCTCTATGTACTAACGATTGGGAATCGCCGAGGTATTTGTACAAATAGGTATAATCC  
ATGT-----AACTAC-----AGAAAC-----TATCAAAATGAA---ATAGTT---GACGAT-----  
-----AATAAC-----

TATAAGTATACAAAAGAGAAAGAACCTTATTTTTGTAGTTTCTACGATGCGCTTGGAGCTTATCGTCAGAAACGAATCGA  
CTTATACAGTCCCTTTGTGGCTC-----CGGTGG---CGGCTA-----  
GATCAATGCGTGATTGCCTCAATAAATAGAGAAGTTCCCATTTGAAGTTCAATATGAATCTTTGGGTATCTACCATGAGAT  
TCACGAGCACTATCGAATAGTAAAAAGCGTAAAAAAGAAATCGTTTTGTATATACATTTCGAACCACTGTTGGTCATATTT  
CTTTTTATCGAGAAATAGAAGAAGCTATACAAGGGTTTTGTTCGGACCTAT-----  
-----

ATGGCAGAA---CGGGCCGATCTGGTCTTT-----  
CACAATAAAGCGATAGATGGAAGTCCCATGAAACGACTTATTAGTAGATTAATAGATCATTTTGGAATGGCATATACATC  
ACACATTTCTGGATCAAGTAAAGACTCTGGGTTTTCCGGCAAGCCACTCTGACATCAATTTTCATTAGGAATTGATGATCTTT  
TAACAACGCCTTCTAAGGGATGGTTAGTACAAGATGCGGAACAACAAAGTTTGATTTTGGAAAAGCACCATCATTATGGG  
AATGTACACGCAGTAGAAAAATTACGCCAATCAATTGAGATATGGTATGCTACAAGTGAATATTTGAGACAAGAAATGAA  
TCCAAATTTTCAGGATGACTGATCCTTTTAAATCCAGTCTATATAATGTCTTTTTCGGGAGCTAGAGGAAATGCATCTCAGG  
TCCACCAATTAGTAGGTATGAGAGGATTAATGTTCGGATCCCCAAGGACAAATGATTGATTTGCCATTCAAAGCAATTTA  
CGCGAAGGGCTTTCTTTAACGGAATATACCATTTTCTGTTACGGAGCCCGCAAAGGAGTTGTGGATACTGCTGTACGAAC  
ATCAGATGCTGGATACCTCACGCGTAGACTTGTGTAAGTAGTTCAACACATTGTTGTACGTAGAACGGACTGTGGCCTA  
TCCGAGGTATTTCCGTAAGTCTCGA-----AATGGGGTTGGG-----  
-----GTGACGGAAAGGATTTTTATCCAAACA-----

CTAATTGGTTCGCGTATTAGCGAACGATGTATATATGGGTCTGCGATGCATTGCGACTCGAAATCAAGATATTGGGATTGG  
ACTTGTCAATCGATTTCATAACC-----  
TCTCGGGCACAACCAATATATATTCGAAGCCCTTCACTTGCAGGAGTACATCTTGGATCTGTCAATTATGTTATGGTTCG  
GAGTACCACT-----  
CACGGTAACCTGGTTCGAATTAGGAGAAGCTGTAGGTATTATTGCGGGTCAATCAATTGGAGAACCAGGAACTCAACTAAC  
ATTAAGAATTTTCATACCGGTGGAGTATTCACAGGCGGTATCGCAGAACATGTACGAGCTCCTTCTAATGGAAAAATTA  
AATTCAAT-----  
GAGGATTTAGTTCATCCACACGTACACGTACATGGACATCCCGCTTTTCTATGCCATATAGACCTGCATGTAACCTATTGA  
GAGTACAGGATATTATACATAAAGTGAATATTCACCAAAAAAGTTTTCTTTTGGTTCAAAACGATCAATATGTAGAATCAG  
AACAAGTGAATTGCTGAGATTTCGCGCTGGAACATCCACT-----  
TTAAAGGAGAGGGTTCAAAAACATATTTATTCTGACTCAGAGGGAGAGATGCACTGGAGTACCGATGTG-----  
TACCAT-----  
ACACCTGAATATACGCATGGTAATGTTTCATCTTACCCAAAACAAGTCATTTATGGGTATTATCAGGAAGTCCA-----

-TGCAGATCCAGT-----ATAGTGCCTTTTCCACTCCACAAGGATCAAGATCAAATGAATGTTCAATCTCTT-----  
TATGTC---GAAGAGAGATATATTTCT-----GACCTC-----TCGATGAATAATGATCGA-----

-----GTGAGACACAAATTGTTTGGGTGGGAT-----CAA-----  
-AAAAGGGGGAGGGTT-----TCT-----TATTAT---TCA---GGACCT-----GATCGAATCATATCCAAC-  
-----AGGAATTGGGATTCCATATATCCTCTTATTCTCCACGAGAATTCTGAT-----  
TTATTGGCGAAGAGGCGAAGAAATAGATTTCATCATCCCATTCCAA-----TATGATCAAGAA-----  
CAGGAGAAGGAACTAAGG---CCTCCT-----  
GGTATCGTGATTAAAATACCCATAAAAGGTATTTTACGTAGAAATAGTATTCTTGCCTATTTTCGACGATCCCCGATACAG  
AAGA-----AGTAGTTTCAGGAATT-----

-----GCCAAATATGGGACCATAGAAGTCGATTCC-----

ATAATAAAAAAAGAAGATTTA---  
ATTGAATATCGAAAGACAAGAGAGTTTGGACCAAATACCAAATCAAATCAAAGTAAATCGATTTTTTTTTCATTCTGA  
AGAAGTGCATATCTTACCTAGATCTTCGTCC---  
ATAATGGTACGGAATAATAGTATCATTGGAGTAGATACACGAATCACTTTGAATATA-----  
AGAAGTCAAGTAGGCGGCTTGGTCCGAGTGGAGAAAAAAAAAAAAAGGATT---  
GAATTGAAAATATCTTCTGGAGATATCCATTTTCTGGAGAGACGGATAAT-----  
ATAGCCCGGTACAGCGGCATCTTGATA-----CCACCTGGAAGGGTAAAAAAC-----  
ACGGAATCA-----AAATTC-----AAAAATTGGATCTATGTCCAACGG-----ATCACACCTATCAAG-----

-----  
Arabidopsis ACCGGTTCTTCTCCCGAGTTGAGACCCATCATTGAGATAGAAGGGGGTAAACTAATGAGTTCA--  
-

GATATTAATGAACTCTATAGAAGAGTTATCTATCGGAACAATACTCTTACCGATCTATTAACAACAAGTAGATCTACACC  
GGGGGAATTAGTAATGTGTGTCAGGAAAAATTGGTACAAGAAGCCGTGGATACACTTCTTGATAATGGAATCCGTGGACAAC  
CCATGAGGGATGGTCATAATAAGGTTTACAAGTCATTTTTCAGATGTAATTGAAGGCAAAGAGGGGAAGATTTTCGCGAGACT  
CTGCTTGGGAAACGGGTCGATTATTCGGGGCGCTCGGTGATTGTGCTTGGACCTTCACTTTTATTACATCGCTGTGGATT  
GCCTCGCGAAATAGCAATAGAGCTCTTCCAGACATTTGTAATTCGTGGTTTAAATTAGACAACACCTGGCTTCGAACATAG  
GAGTTGCTAAGAGTCAAATTCGTGAAAAAAGCCGATTGTCTGGGAAATCCTTCAAGAAGTCATGCAGGGGCATCCCCTA  
TTACTGAATAGAGCACCTACCCTACATAGATTAGGCATACAGTCATTCCAACCTATTTTATGGAAGGACGCCTATTTG  
TTTACATCCATTAGTTTGTAAAGGGGTTCAATGCAGACTTTGATGGGGATCAAATGGCTGTTTATGTCCTTTTATCTTTAG  
AGGCTCAAGCAGAGGCTCGTTTACTTATGTTTTCTCATATGAATCTTATCTCCAGCTATTGGAGATCCCATTTTCGGTA  
CCGACTCAAGATATGCTTATTGGACTCTATGTATTAACGAGCGGCCTCGTTCGAGGTATTTGTGCAAACAGATATAATCC  
ATGT-----AATCGA-----AAAAAC-----TATCAAAATGAA---AGAATT---TACGAA-----  
-----ACAAAC-----TATAAGTATACGAAA-----

GAACCCTTTTTTTCGAATTCCTATGATGCAATTGGAGCTTATCGACAGAAAAAATCAATTTAGATAGTCCTTTGTGGCT  
T-----CGGTGG---CAATTA-----GATCAACGCGTTATTGCTTCA-----  
AGAGAAGTTCCTATCGAAGTTCACTATGAATCTTTTGGTAACTATCATGAGATTTATGCACACTATCTAATAGTAAGAAG  
TGTAATAAAGAAAATTTTGTATATATATTCGAACCACAGTTGGTCATATTTCTTTTTATCGAGAAATCGAGGAAGCTA  
TACAAGGTTTTTCTCAAGCCTGT-----  
-----ATGGCGGAA---CGGGCCAATCTGGTATTT--  
-----

CACAATAAAGTGATAGATGGAAGTCTATTAACGACTTATTAGCCGATTAATAGATCACTTCGGGATGGCATATACATC  
ACACATCCTAGATCAAGTAAAGACTCTGGGTTTCCAGCAAGCCACTGCTACATCCATTTTATTAGGAATTGATGATCTTT  
TAACGATACCTTCTAAGGGCTGGCTTGTCCAAGATGCTGAACAACAAGTTGGATTTTGGAAAAACACCATCATTATGGG  
AATGTACATGCGGTAGAAAAATTACGCCAATCTATTGAGATATGGTATGCTACAAGTGAATATTTGCGACAAGAAATGAA  
TCCTAATTTTAGGATGACGGACCCCTTCAATCCAGTCCATATGATGTCTTTTTTCGGGAGCTAGGGGAAATGCATCTCAAG  
TACATCAATTAGTAGGTATGAGAGGATTAATGTCGGATCCCCAAGGACAAATGATTGATTTACCTATTCAAAGCAATTTA  
CGCGAAGGACTGTCTTTAACAGAATATATATTTCTTGTCTATGGAGCCCGTAAAGGAGTTGTAGATACTGCTGTACGCAC

ATCAGATGCTGGATATCTTACGCGTCGACTTGTGGAAGTAGTTCAACATATTGTTGTACGTAGAACAGATTGTGGCACTA  
TCCGAGGGATTTTCGGTGAGTCCTCGAAATAAAAAATCGG-----  
-----ATGATGTCAGAAAGAATTTTTATCCAAACA-----  
TTAATTGGTCGTGTCTTAGCAGACGATATATATATAGGTTCCCGATGTGTGCGCCTTTTCGAAATCAAGATCTTGGGATTGG  
ACTTGTCAATCGATTAATAACC-----  
TTTGAACACAATCAATATCCATTTCGAACTCCCTTTACTTGTGCGGAGTACATCTTGGATCTGTGCGATTATGTTATGGTCG  
GAGTCCCACT-----  
CATGGTGACCTCGTTGAATTGGGGGAAGCTGTAGGTATTATCGCGGGTCAATCGATCGGCGAACCGGGGACTCAACTAAC  
ATTAAGAATTTTTATACCGGCGGAGTATTTACAGGAGGTACTGCCGAACATGTACGAGCCCCTTATAATGGAAAAATCA  
AATTCAAT-----  
GAGGATTTGGTTCATCTACACGTACACGTACACGGGCATCTGCTTTTCTATGTTATATAGACTTGTCTGTAATTATTGA  
GAGCGAAGATATTATACATAGCGTGACTATTCCACCAAAAAGTTTTCTTTTAGTTCAAAATGATCAATATGTGGAATCAG  
AACAAAGTGATTGCTGAGATTTCGCGAGGGGAACATACACTTTTCAT-----  
TTTAAAGAGAGGGTTAGAAAATATATTTATTCTGACTCAGAGGGCGAAATGCACTGGAGTACTGATGTG-----  
TCCCAT-----  
GCACCCGAATTTACATATAGTAATGTCCACCTCTTACCAAAAACAAGTCATTTATGGATATTATCCGGAGGTTCA-----  
-TGTGGATCTAGT-----CTAATTCGTTTTTCGATCCATAAAGATCAAGATCAAATGAATATAACCCTTTCTT-----  
TCCGCC---GAAAGAAAATCTATTTCT-----AGCCTC-----TCAGTGAATAATGATCAA-----  
-----  
-----GTGAGCCAAAAATTTTTTAGTTCCGATTTT---GCCGATCCAAAA--  
-AAATTAGGG---ATT-----TAC-----GATTAT---TCA---GAATTG-----AATGGAAACTTAGGTACT-  
-----AGTCATTATAATTTAATATATTCTGCTATTTTTTCATGAGAAGTCCGGAT-----  
TTATTAGCAAAAAGACGAAGAAATAGATTTCTCATTCCATTCCAA-----TCGATTCAAGAG-----  
CAAGAGAAAAGAAATTCATA---CCGCAGTCA-----  
GGTATCTCGGTTGAAATACCCATAAATGGTATTTTTCCGTAGAAATAGTATTTTTGCTTTTTTTGATGATCCTAGATACCG  
AAGA-----AAGAGTTCGGGAATT-----  
-----  
-----CTTAAATATGGGACTCTAAAGCGGATTCA-----  
-----  
ATCATCCAAAAAGAGGATATG---ATTGAGTATCGAGGAGTCCAAAAAATTAAGACAAAATAC-----  
GAAATGAAAGTAGATCGCTTTTTTTTTCATTCTGAGGAAGTGCATATTTTACCCGAATCCTCTGCC---  
ATAATGGTACAGAAGTATAGTATCATTGGAGTGGATACACGACTCACTTTAAATATA-----  
AGAAGCCAAGTCGGCGGGTTGATCCGAGTAGAGAAAAAAGGATT---  
GAACTCAAAATATTTTCAGGGGATATCCATTTTCCGGACAAGACAGATAAA-----  
ATATCCCACACAGTGGCATCTTGATA-----CCGCCAGGAAGAGGAAAAAAA---AAC-----  
TCGAAGGAATCC-----AAAAAATTT-----AAAAATTGGATTTATGTCCAACGG-----ATTACACCAACCAAG--  
-----  
-----  
Atropa ACCAGTTCCTCCTCCTGAGTTGAGACCGATCATTAGATAGATGGGGGTAAACTAATGAGCTCA--  
-  
GATATTAATGAACTCTATAGAAGAGTTATCTATCGGAACAATACCCTTACCAGTCTATTAACAACAAGTAGATCTACGCC  
AGGAGAATTAGTAATGTGTGAGGAGAAATTAGTACAAGAAGCCGTGGATACACTTCTTGATAATGGAATCCGGGGACAAC  
CAATGAGGGACGGTCATAATAAAGTTTTACAAGTCATTTTCTGATGTAATTGAAGGCAAAGAGGGGAAGATTTTCGTGAGACT  
CTGCTTGGCAAACGAGTCGATTATTCAGGACGTTCTGTGATTGTGCGTGGGTCCTTCACTTTTATTACATCGATGTGGATT  
GCCTCGTGAAATAGCAATAGAAGTTTCCAGACATTTGTAATTCGTGGTCTAATTAGACAACATCTTGCTTTCGAACATAG  
GAGTTGCTAAGAGTAAAATTAGAGAAAAAGAGCCGATTGTATGGGAAATCCTTCAAGAAGTTATGCAGGGACATCCTGTA  
TTGCTGAATAGAGCACCCACTCTGCATAGATTAGGCATACAGGCATTCCAGCCCGTTTTAGTGGAGGGGCGCGCTATTTG  
TTTACATCCATTAGTTTGAAGGGATTCAATGCCGATTTTGTGAGATCAAATGGCTGTTTATGTACCCCTTATCCTTGG  
AGGCTCAAGTGGAGGCCCGTTTACTTATGTTTTCTCATATGAATCTTTTGTCTCCGGCTATTGGGGATCCCATTTCCGTA  
CCAACGCAAGATATGCTTATTGGACTCTATGATTAACGAGCGGAAATCGTCGAGGTATTTGTGTAATAGATATAATCC  
ATGT-----AATCGC-----AGAAC-----TATCAAAATCAAAAAGAAGT---GACAAT-----

-----AGTTAC-----TATAAGTATACGAAA-----  
GAACCCTTTTTTTTCGAATTCCTATGATGCAATTGGAGCTTATCGGCAGAAACGAATCAATTTAGATAGTCCTTTGTGGCT  
C-----CGGTGG---CGACTA-----GATCAACGCGTTATTGCTTCA-----  
AGAGAAACTCCCATCGAAGTTCACCTATGAATCTTTAGGTACTTTTTATGAGATTTATGGACACTATCTAATAGTAAGAAG  
TCTAAAAAACAAATCCTTTTTATATACATTAGAACCCTGTTGGTCATATTGCTCTTTATCGAGAAATTGAAGAAGCTA  
TACAGGGGTTTTCTCGGGCCTATTCATATGGTACC-----  
-----ATGGAGGTA-----CTTATGGCAGAA---CGGGCCAATCTGGTCTTT--  
-----  
CACAATAAAGCGATAGACGGAACTGCCATGAAACGCCTTATTAGTAGATTAATAGAGCACTTCGGAATGGCATATACATC  
ACATATCCTGGATCAAGTAAAAACTCTGGGGTTTCAACAAGCTACTGCTACATCCATTTTCATTAGGAATTGATGATCTTT  
TAACAATACCTTCTAAGGGATGGCTAGTTCGAAGTCTGAACAACAAAGTTTGATTTTGGAAAAACACCATCATTATGGG  
AATGTACACGCGGTAGAAAAATTACGTCAATCCATTGAAATATGGTATGCTACAAGTGAATATTTGCGACAAGAAATGAA  
TCCTAATTTTAGGATGACTGACCCTTTAATCCAGTTCATATAATGTCTTTCTCGGGAGCTAGAGGAAATGCATCTCAGG  
TACATCAATTAGTAGGTATGAGAGGATTAATGTGCGATCCTCAAGGACAAATGATTGATTTACCTATTCAAAGCAATTTG  
CGCGAAGGACTCTCTTTAACAGAATACATCATTCTTGCTACGGAGCCCGTAAAGGAGTTGTGGATACTGCTGTACGAAC  
ATCAGACGCTGGATATCTCACTCGCAGACTTGTGAAAGTAGTTCAACACATTGTTGTACGTCGAACGGATTGTGGCACC  
CCCGGGGATTTCTGTGAGTCTCGG-----AATGGG-----  
-----ATGATGCCGAAAGGATTTTTAGCCAAACA-----  
TTAATTGGTCGTGTATTAGCAGATGATATATACATGGGTCCGCGATGTATTGCCACTAGAAATCAAGACATTGGCATTGG  
ACTTGTAATAGATTCATAACC-----  
TTTCGGGCACAACCAATCTCTATTGCAACTCCCTTTACTTGTAGGAGTACATCTTGGATTTGTCGATTATGTTATGGCCG  
GAGTCCTACT-----  
CATGGCGACCTGGTTGAATTGGGGGAAGCCGTAGGTATTATTGCAGGTCAATCGATTGGAGAACCGGGTACTCAATTAAC  
ATTAAGAACTTTTCATACCGGAGGAGTATTCACGGGGGTACTGCAGAACATGTGCGAGCCCCATCTAATGGAAAAATAA  
AATTCAT-----  
GAGGATTTGGTTCATCCGACACGTACACGTATGGGCATCCCGCCTTTCTATGTTCTATAGACTTGTATGTAACTATTGA  
GAGTGAAGATATTCTACATAATGTGAATATTCACCCAAAAGTTTGCTTTTAGTTTCAAACGATCAATATGTAGAATCAG  
AACAAGTAATTGCTGAGATTCGCGCAGGAATATCCACTTTGAAT-----  
TTTAAAGAGAAGGTTGAAAACATATTTATTCTGATTGACGAGGAGAAATGCACTGGAGTACCGATGTC-----  
TATCAT-----  
GCACCCGAATTTACATATGGTAATGTTTATCTATTACCAAAAAACAAGTCATTTATGGATATTATTAGGAGGGCCG-----  
-TGCAAGTCCAGT-----CTAGTCTACCTTTTCGATCCACAAGGATCAGGATCAAATGAATGCGCATTCTCTT-----  
TCTGGC---AAGCAAAGATATACTTCT-----AACCTC-----TCAGTAACCAATGATCAG-----  
-----  
-----GCGAGGCAGAAATTATTTAGTTTCGGGTTTT---TCTGGTAAA-----  
-AAAGAGGATAGGATT-----CCT-----GATTAT---TCA---GACCTT-----AATCGAATCATATGTACT-  
-----GGTCAGTATAATCTCGTATATTCGCTATTCTCCATGAGAATTCTGAT-----  
TTATTGTCAAAAAGGCGAAGAAATAAATTCATCATTCCACTACAC-----TCGATTCAAGAA-----  
CTCGAGAATGAACTAATG---CCCTGTTCA-----  
GGTATCTCGATTGAAATACCCGTAATGGTATTTTCCGTCGAAATAGTATTCTTGCTTATTTTCGATGATCCTCGATACAG  
AAGA-----AAGAGTTCGGGCATT-----  
-----  
-----ATTAAATATGGGACTATAGAAACGCATTCA-----  
-----  
GTCATCAAAAAGAGGATTTG---ATTGAGTATCGAGGAGTCAAGGAATTTAGGCCAAAATAC-----  
CAAATGAAAGTAGATCGATTTTTTTTTTTCATTCTGAAAGAGGTGCATATCTTGCCCGGATCTTCTTCC---  
ATAATGGTACGGAATAATAGTATCGTTGGAGTAGATACACAAATCACCTTAAATCTA-----  
AGAAGCCGAGTCGGTGGGTTGGTTCCGGTGGAGAGAAAAAAAACGAATT---  
GAACTTAAAATCTTTTCTGGAGATATCCATTTTCTGGCGAGACAGATAAG-----  
ATATCCAGACATACCGGCCTTTTGATA-----CCACCAGGAACAGGAAAAATA---AAT-----  
TCCAAGGAATCC-----AAAAAAGTG-----AAAAAGTGGATCTATGTCCAACGG-----ATTACACCTAGTAAG--  
-----



-----  
-----  
Buxus ACCAGTTCCTCCCGAGTTGAGACCGATCATTAGATAGATGGGGTAAATCAATGAGTTCG--  
-

GATATTAATGAACCTATAGAAAGAGTTATCTATCGAAATAATACTCTTATCGATCTATTAACAACAAGTAGATCGACGCC  
AAGGGAATTAGTAATGTGTGTCAGGAGAAATTGGTACAAGAAGCCGTGGATACACTTCTTGATAATGGGATTTCGCGGACAAC  
CAATGAGGGACGGTCATAATAAAGTTTACAAGTCATTTTCAGATGTAATTGAAGGCAAAGAGGGGAAGATTTTCGTGAGACT  
CTGCTTGGCAAACGGGTCGATTATTCGGGGCGTTCCGTCATTGTTGTGGGACCTTCGCTTTCATTACATCGATGTGGATT  
GCCTCGCGAAATAGCAATAGAGCTTTTCCAGACATTTGTAATTCGTGGTCTAATTAGACAACATGTTGCTTCCAACATAG  
GAGTTGCTAAAAGTAAAAATTAGGGAAAAGGAACCAATTGTATGGGAAATACTTCAAGAAGTTATGCAGGGGCATCCTGTA  
TTGCTGAATAGAGCACCTACTCTGCATAGATTAGGCATACAGGCATTTCAACCCATTTTAGTAGAAGGACGTGCTATTTG  
TTTACATCCATTAGTTTGAAGGGGTTCAATGCAGACTTTGATGGGGATCAAATGGCTGTTTCATGTACCTTTATCTTTGG  
AGGCTCAAGCAGAGGCTCGTTTACTTATGTTTTCTCATATGAATCTTGTCTCCAGCTATTGGGGATCCCATTTCCGTA  
CCAACCTCAAGATATGCTTATTGGACTCTATGTATTAACGAGCGGGAATCGTCGAGGTATTTGTGCAAATAGGTATAATCC  
ATGT-----AACCGC-----GGTAACCGTGAACTTTCAAATGAA---AGAATT---GACGAT-----  
-----ATAAC-----

TATAAGTATACGAAAGAAAAAGACCCTTATTTTTGTAGTTTCTATGATGCAATTGGAGCTTATCGGCAGAAACGAATCAA  
TTTAGATAGCCCTTTGTGGCTC-----CGGTGG---CGACTA-----GATCAACGCATCATTGCATCA-----  
AGAGAAGTTCCCATCGAAGTTCACTATGAATCTTTGGGTACCTATCATGAGATTTATGTGAACCTATCTAATAGTAAAAAG  
TGTAAGAAAAAGAAATTCTTTGTATATACATTCGAACCACTGTTGGTCAATTTATTTTTATCGAAAAATAGAAGAAGCCG  
TACAAGGTTTTTTCCGGGCCTGCTCCTACGGTACC-----  
-----ATGGAGGTA-----CTTATGGCAGAA---CGGGCCGATCTGGTCTTT--  
-----

CACAATAAAGTGATAGATGGAACGCAATGAAACGACTTATTAGCAGATTAATAGATCACTTCGGAATGGCGTATACATC  
ACACATCCTGGATCAAGTAAAGACTCTGGGTTTCCAACAAGCCACTGCTACATCCATTTTCATTAGGAATTGATGATCTTT  
TAACAACACCTTCTAAGAGATGGCTAGTCCAAGATGCTGAACAACAAAGTTTTATTTTGGAAAAACACCATCATTATGGG  
AATGTACACGCGGTGCAAAAAATTACGTCAATCCATTGAGATATGGTATGCTACAAGTGAATATTTACGACAAGAAATGAA  
TACTAATTTTAGGATGACTGACCCTTCTAATCCAGTCCATATAATGTCTTTTTCGGGAGCTAGAGGAAATCCATCTCAGG  
TACACCAATTTAGTAGGATGAGAGGATTAATGTCGACTCCCCAAGGACAAATGATTGATTTACCATTCAAAGCAATTTA  
CGCGAAGGACTCTCTTAAACGGAATATATCATTTCCTGCTATGGAGCCCAGAAAGGAGTTGTAGATACTGCTGTACGAAC  
ATCAGATGCTGGATATCTCACGCGCAGACTGGTTGAAGTAGTTCAACACATTGTTGTACGTAGAACGGATTGTGGCACCA  
TCCGAGGTATTTATGTGACTTCTCGA-----AATGGG-----  
-----ATGATGACGGAAGAATTTTTATCCAAACA-----

TTAATTGGTTCGTGATTAGCAGACGATATATATATGGGCCACGATGCATTGCTACTCGAAATCAAGATGTTGGGATTGA  
ACTTGTCAACCGATTTCATAACC-----  
TTTCGAGCACAACCAATATCTATTCGAACCCCTTTACTTGCAGGAGTACATCTTGGATCTGCCGATTATGTTATGGTGC  
GAGTCCCACT-----  
CATGGCGACCTGGTTCGAATTGGGAGAAGCTGTAGGTATTATTGCGGGTCAATCTATTGGGGAACCAGGGACTCAACTAAC  
ATTAAGAATTTTCATACCGGTGGAGTATTCACAGGGGGTACTGCAGAACATGTACGAGCTCCTTTTAATGAAAAATAA  
AATTCAT-----

GAGGATTTGGTTCATCCACACGCACACGTCATGGGCATCCTGCTTTTCTATGTTATATAGACCTGTATGTAACCTATTGA  
GAGTCAGGATATTATACATAATGTAATATTCACAAAAAAGTTTTCTTTTAGTTCAAATAATCAATATGTAGAATCAG  
AACAAGTAATTGCTGAGATTTCGCGCGGAAACATCCACTTTTAAT-----  
TTTAAAGAGAGGGTTTCGAAAACATATTTATTCTGACTCAGAGGGAGAAATGCCTGGAGTACCGATGTG-----  
TACCAT-----

GCACCTGAATATACATATGGTAATGTTTCATCTCTTACCAAAAAACAAGTCATTTATGGGTATTATCAGGAGGTCCG-----  
-TGCAGATCCCG-----ATAGTCCCTTTTTCGCTTACAAGGATCAAGATCAAATGAACGTTTCATTCTCT-----  
TCTGCC---GAACGACGATATATTTCT-----AACCTC-----TCAGCGACTAATGATCAA-----  
-----

-----GTGAGACATAAATTGTTTAGTTTCGGATCCT---TCTGGTAAA-----  
-AGGGGGGGTAGTATT-----CTT-----GATTAT---TCA---GGACCT-----AATCGAATCATATGCAAT-  
-----GGTCATTTGAATTTTCATATATCCTACCATTCTACATGAGAATTCTGAT-----  
TTATTGGCAAAGAGGCGAAGAAATAGATTACTACTCCCACTCCAA-----TCTAATCAAGAA-----  
CGAGAGAAAGAACTAATG---CCCTGTTCA-----  
GGTATCTCGATTGAAATACCCATAAATGGAATTTTCCGTAGAAATAGCATTCTTGTCTATTTTCGATGATCCTCTATACAG  
AAGA-----AAGAGTTCGGGAATT-----



AACAAGTGATTGCCGAGATTTCGCGCTGGAACATCCACTTTCAATTTGAAAGTTAAAGAAAAAGTTGAAAACATATTTAT  
TCTGACTCAGAGGGGAGAAATGCACTGGAGTACCGATGTG-----TACCAT-----  
GCACCTGAATATACATACGGTAATGTTTCATCTCTTACCAAAAACAAGTCATTTATGGATATTATCAGGAGGTCTG-----  
-TGCAGATCCAGT-----ATAGTGCCTTTTTCGCTCCACAAGGATCAAGATCAAATGAATGTTTCATTCTCTT-----  
TCTGTG---GAACAGAGATATATTTCT-----GACCTC-----TCAGTAACTAACGTTTGA-----  
-----  
-----

-----GTGAGACACAAATTGTTTAGTTTCGGATTCT---TCCGGTAAA-----  
-AAAGGGGGGAGGGCT-----CCT-----GATTAT---TCA---GGACCT-----GATCGAATCATATCCAAT-  
-----GGTCATTGGAATTTTCATATATCCTGCCATTCTCCACGAGAATTCTGAT-----  
TTATTGGCTAAGAGGCGAAGAAATAGATTTCATTATTTCCATTCCAA-----TCTGATCAAGAA-----  
CGAGAGAAAAGAACTAATG---CCCCGTTCC-----  
GGTATCTCGATTGAAATACCCATAAATGGTATTTTACGCAGAAATAGTATTCTTGCTTATTTTCGACGATCCCCGATACAG  
AAGA-----AGCAGTTCGGGAATT-----  
-----  
-----

-----ACTAAATATGGGACTATAGGGGTGGATTCA-----  
-----

ATCGTCAAAAAAGAGGATTTG---ATTGAGTATCGAAGAGCAAAAAGAAATTTAGGCCAAAATAC-----  
CAAATGAAAGTAGATCGCTTTTTTTTTTCATTCCCAGAAAGTGCATATCTTACCCGCATCTTCGCC-----  
GTAATGGTACGGAATAATAGTATCATTGGAGTAAATACACGAATAGCTTTAAATACA-----  
AGAAGCCGAGTAGGTGGATTGGTCCGAGTGGAGAGAAAAAAAAAAGGATT---  
GAACTGAAAATATTTTCTGGGGATATCCATTTTCTGGAGAGACAGATAAG-----  
ATATCTCGGCACAGCGGCATCTTGATA-----CCACCAGGAACGGGAAAAAAAA---AAT-----  
GTTAAGGAATCC-----AAAAAATGG-----AAAAATTGGATTTATGTCCAACGG-----ATTACACCTACTAAG--  
-----  
-----

-----  
Ceratophyllum ACCGGTTCTTCCCTCCCGAGTTGAGACCAATCATTTCAGATAGATGGGGGTAAACCAATGAGTTCA--  
-

GATATAAATGAACTCTATAGAAGAGTTATCTATCGAAATAATACTCTTACCGATCTATTAACAACAAGTAGATCTACACC  
AGGGGAATCAGTAATGTGTGAGGAGAAGTTGGTTCAAGAAGCCGTGGATACACTTCTTGATAATGGGATTTCGCGGACAAC  
CAATGAGAGACGGCCATAATAAAGTTTACAAGTCGTTTTTCAGATGTAATTGAAGGCAAAGAGGGGAAGATTTTCGTGAGACT  
TTACTTGGTAAACGGGTTGATTATTCGGGACGTTCTGTTATTGTCGTGGGTCCTTCGCTTTTCATTACATCGATGTGGATT  
ACCTCGAGAAATTGCAATAGAGCTTTTCCAGACATTTGTAATTCGTGGGCTAATTAGACAACAATAGCTTCCAACATAG  
GAATTGCTAAAAGTAAAATTCGTGAAAAAGAACCAATTGTATGGGAAATACTTCAAGAAGTTATGCAAGGGCATCCCGTA  
TTGCTGAATAGAGCACCGACCTTGCATAGGTTAGGCATACAGGCGTTCCAACCCATTTTATGAGGGGACGTGCTATTTG  
TTTACATCCATTAGTTTCGTAAGGGATTTAATGCAGACTTTGATGGCGATCAAATGGCTGTTTCATGTACCTTTATCTTTGG  
AAGCTCAAGCAGAGGCTCGTTTACTTATGTTTTCTCATATGAATCTTTTGTCTCCAGCTATGGGAGATCCCATTTCCGTC  
CCAATCAAGATATGCTTATTGGGCTCTATGTATTAACGATCGGGAATCGTTCGAGGTATTTGTGCAAATAGGTATAATTC  
ATGC-----AATCGC-----GGAAAA-----TATCAAAATGAA---ACAAAG-----  
-----AATAAC-----

TCTAAGTATACGAAAGCGAAAGAGCCCTATTTTTTCGAGTGCCTATGATGCCTTGGAGCTTATCGACAGAAACGAATCAA  
TTTAGATAATCCTTTGTGGCTA-----CGGTGG---CGCTTA-----GATCAACGTGCCATTGCCTCA-----  
AGAGAAGTTCCCATCGAAGTTCAATATGAATCTTTGGGTACCTATCATGAGATTTATGGACAATATCTAATAGTACGGAG  
TGTAATAAAGAAATCCTTTGTATATATATTAGAACCACTGTCGGTCATATTTCTTTTTATCGAGAAATAGAAGAAGCCA  
TACAGGGGTTTTGTGAGCCTACTCATATGGTACTTAA-----  
-----ATGGAGGTA-----CTTATGGCAGAA---CGGGCCGATCTGGTCTTT--  
-----

CACAATAAAGCGATAGATGGAAGTCCATGAAACGACTTATTAGCAGATTAATAGATCACTTCGGAATGGCATATACATC  
TCACATCCTGGATCAAGTAAAGACTTTGGGTTTTCCAGCAAGCCACTGCTACATCCATTTTCATTAGGAATTGATGATCTTT  
TAACAATACCTTCTAAGGGATGGTTAGTCCAAGATGCTGAACAACAAAGTTTGACTTTGGAAAAGAACCATCACTATGGG  
AATGTACACGCGGTGCAAAAATTACGTCAATCTATTGAGATCTGGTATGCTACAAGTGAATATTTGAGACAGGAAATGAA  
TCCTAATTTTAGGATGACTGATCCTTCTAATCCAGTCCATATAATGTCCTTTTTCGGGAGCTAGAGGAAATGCATCTCAAG

TACACCAATTAGTAGGTATGAGAGGATTAATGTCAGATCCCCAAGGACAAATGATTGATTTACCTATTCAAAGCAATTTA  
CGCGAAGGACTTTCTTTAACGGAATACATAATTTCTTGCTACGGAGCCCACAAAGGAGTTGTGGATACCGCTGTACGAAC  
ATCAGATGCTGGATACCTCACACGTAGACTTGTTGAAGTAGTTCAACACATTGTTGTACGTAGAACAGATTGTGGCACTA  
TCCGAAGGATTTCCGTGAGTCCTCAA-----AACGGT-----  
-----ATGACAGAAAAAATTTTTATCCAAACG-----  
CTAATTGGTCGTGTATTAGCGGACGATATATATATAGGCCCCCGATGCATTGCCACTCGAAATCAAGATATTGGGATTGG  
ACTTATCAATCGATTATAACC-----  
TTTCGAGCACAACCAATATATATTTCGAACCCCTTTACTTGCAGGAGTACATCTTGGATCTGTGCGATTATGTTATGGTCG  
GAGTCCCACT-----  
CATGGCGACTTGGTCGAGTTGGGAGAAGCTGTAGGTATTATTGCGGGTCAATCAATTGGGGAACCAGGGACTCAACTAAC  
ATTAAGAACCTTTTACTACTGGCGGAGTATTCACCGGCGGTACTGCAGAACATGTACGAGCTCCTTCTAATGGAAAAATCA  
AATTCAT-----  
GAGGATTTGGTTCATCCGACACGTACACGTCATGGCCATCCTGCTTTTCTATGTTATATAGATCTGTATGTAACGATTGA  
GAGTCAGAGTATTATACATAATGTGAATATTCCACCAAAAAGTTTGATTTTAGTTCAAATGATCAATATGTAGAATCCG  
AACAAAGTAATTGCTGAGATTTCGCACGGGAGCATCCACTTTTTCAT-----  
TTTAAAGAAAGGGTTCGAAAACATATTTATTCTGACTACAAGGAGAAATGCACTGGAGTACCGATGTG-----  
TACCAT-----  
GCACCTGAATATACATACGGTAATGTTTCATCTGTTACCAAAAACAAGTCATTTATGGATATTATCGGGAGGTCCG-----  
-TGCAGATCCAGT-----ATAGTGCCTTTTTTCGATCCAGAAGGATCAAGATCAAATCAATGTGAATTCTCTT-----  
TTTGTT---GAACAGAGATACATTTCT-----GATCTC-----TCAGTGACTAATGATCGA-----  
-----  
-----GTGAGACACAAAATTTTTAGTTCGGATCCT---TCCGGGCAA-----  
-AAGGGGGGGCGGATT-----TTT-----GATTATGATTCA---GGACCT-----GATCGAATCGTATCTAAT-  
-----AGTCAA-----TTTCTATATCCTGCCATTCCCCACGAGAATTCCGAT-----  
TTATTGGCGAAGAGGGCGAAGAAATCGATTTCTTATCCCATTCCAA-----TATGATCAAGAA-----  
CAAGAAAAAGAATAATG---TGCCCTTAC-----  
GGTATCTCGACGGAAATACCCATAAATGGTATTTTACGTAGAAATAGTATTCTTGCTTATTTTCGACGATCCGCGATACAG  
ACGA-----AGCAGTTCAGGAATT-----  
-----  
-----ACTAAATACGCAACTATAGAAGTTGATTCA-----  
-----  
ATTGTTAAAAAAGAGGATTTG---ATTGAGTATCGAGGATCAAAAGAATTTAGACCGAAATAT-----  
CAAACGAAAGTAGATCGATTTTTTTTTTTCATTCCCAGAAGAGTGCATATCTTACCCGGATCTTCGTCC---  
ATAATGGTACGTAACAATAGTATCATTGGAGTAGATACACGAATCACCTTAAATATA-----  
AGAAGTTCGAGTGGGTGGACTAGTGCAGTGGAGAGAAAAAAAAAAGAATT---  
GAATTGAAAATCTTTTCTGGGGATATCCATTTTCTGGAGAGACAGATAAG-----  
ATATCCCGGCATAGCGGCATCTTGATA-----CCACCTGGAGTGGTAAAAAAA---AAT-----  
TCTAAGAAATCGAAA---AAGAAATGG-----AAAAATTGGATCTATATCCAACGA-----ATCACACCCACCAAG--  
-----  
-----

Chloranthus ACCAGTTCCTCCTCTGAGTTGAGGCCAATCATTAGATAGATGGGGGTAAACCAATGAGTTCG--

GATATTAATGAACTCTATAGAAGAGTTATCTATCGGAACAATACTCTTACCGATCCATTAACAACAAGTAGATCTACGCC  
AGGGGAATCAGTAATGTGTCAGGAGAAATTGGTACAAGAAGCCGTGGATACACTTCTTGATAATGGGATCCGCGGACAAC  
CAATGAAGGATGGTCATAATAAAGTTTACAAGTCGTTTTTCAGATGTAATTGAAGGCAAAGAGGGGAAGATTCCGTGAGACT  
CTACTTGGTAAACGGGTCGATTATTTCGGGGCGTTCCGTCATTGTGCTGGGTCTTTCGCTTTTATTACATCGATGTGGATT  
ACCTCGAGAAATAGCAATAGAGCTTTTCCAGACATTTGTAATTCGTGGTCTAATCAGACAGCATGTTGCTTCCAACATAG  
GTATTGCTAAAAGTAAAATTCGGGAAAAAGAACCCATTGTATGGGAAATACTTCAAGAAGTTATGCAGGGACATCCTGTA  
TTGTTGAATAGAGCACCCACCCTGCATAGATTAGGCATACAGGCGTTCCAACCCATTTTGTGGAGGGGGCGGCTATTTG  
TTTACATCCATTAGTTTCGTAAGGGATTCAATGCAGACTTTGATGGGGATCAAATGGCTGTTTCATGTACCTTTATCTTTGG  
AAGCTCAAGCAGAGGCTTGTTTACTTATGTTTTCTCATATGAATCTCCTATCTCCAATATTGGGGATCCCATTTCCGTA

CCA ACTCAAGATATGCTTATTGGACTCTATGTATTAACGATCGGAAATCGCCGAGGTATTTGTGCAAATAGGTATAATCC  
ATGT-----AATTGC-----AGAAAC---GATAACGATCAAAATGAA---ACAGTT---GACGAT-----  
-----AATAAC-----  
TATAAGTATACGAAAGAGAAAGAACCCTATTTTTGTAGTTCCTATGATGCACCTTGGAGCTTATCGGCAGAAACGAATCCA  
TTTAGATAGTCCTTTGTGGCTT-----CGGTGG---CGACTA-----GATCAACGTGTCATTGCCTCA-----  
AGAGAAGTTCCCATCGAAGTTCAATATGAATCTTCGGGTACCCATCATGAGATTTATGGGCACTATCTAATAGTAAGGAG  
TGTAAGGAAAGAAATCCTTTGTATATACATTCGAACCACTGTTGGTTCATATTTCTTTTTATCGAGAAATAGAAGAAGCCA  
TACAAGGGTTTTGTGGGCTACTCATAACGGTACC-----ATGGCAGAA---CGGGCAGATCTGGTCTTT--  
-----  
CACAATAAAGTGATAGATGGAAGTCCCATGAAACGACTTATTAGCAGATTAATAGATCACTTCGGAATGGCATATACATC  
ACACATCCTGGATCAAGTAAAGACTCTGGGTTTTCCAACAAGCCACTGCTACATCCATTTTCATTAGGGATTGATGATCTTT  
TAACAATACCTTCTAAAGGATGGCTAGTCCAAGATGCTGAACAACAAAGTTTGATTTTGGAAAAGTACCATCATTATGGG  
AATGTACACGCGGTAGAAAAATTACGTCAATCCATTGAGATATGGTATGCTACAAGTGAATATTTGAGACAAGAAATGAA  
TCCTAATTTTAGGATGACTGATCCTTCTAATCCAGTCCATATAATGTCCTTTTTCGGGAGCTAGAGGAAATGCATCTCAGG  
TACACCAATTAGTAGGTATGAGAGGATTAATGTCGGATCCCCAAGGACAAATGATTGATTTACCCATTCAAAGCAATTTA  
CGCGAAGGACTTTCTTTAACGGAATATATCATTTCCTGCTACGGAGCCCGCAAAGGAGTTGTGGATACTGCTGTACGAAC  
ATCAGATGCTGGATACCTCACGCGTAGACTTGTGTAAGTAGTTCAACACATTGTTGTACGTAGAACAGATTGTGGCACTA  
TCCGAGGTATTTTCGTGAGTCTCAA-----AATGGG-----  
-----ATGGCGAAAAGAATCTTTATCCAAACA-----  
CTAATTGGTCGTGATTAGCAGACGATATATATATGGGTCCACGATGCATTGCCGCTAGAAATCAATATATTGGGATTGG  
ACTTGTCAATCGATTATAACC-----  
TTTTCGAGCACAACCAATATCTATTTCGAACCCCTTTACTTGCAGAAGTACGTCCTGGATCTGTGATTATGTTATGGTCG  
GAGTCCCACT-----  
CATGGGGATCTGGTTCGAATTGGGAGAAGCAGTAGGCATTATTGCGGGTCAATCAATTGGGGAACCAGGGACTCAACTAAC  
ATTAAGAATTTTTCATACCGGTGGGGTATTACAGGTGGTACTGCGGAACATGTACGAGCTCCTTCTAATGGAAAAATAA  
AATTCAT-----  
GAGGATTTGGTTCACTCCACACGTACACGTGATGACATCCTGCTTTTCTATGTTATATAGACCTGTATGTAAGTATTGA  
GAATCAGGATATTATTTCATAATGTGAATATTCGCCAAAAAGTTTTCTTTTAGTTCAAAATGACCAATATGTAGAATCAG  
ACAAGTGATTGCTGAGATTTCGCGCCGGAGCATCCACTTTGAAT-----  
TTTTAAAGAGAGGGTTTCGAAAACATATTTATTCTGACTCAGAGGGAGAAATGCACTGGAGTACCGATGTG-----  
TACCAT-----  
GCATCTGAATATACATACGGTAATGTTTCATCTCTTACCCAAAACAAGTCATTTATGGATATTATCAGGAAGTCCG-----  
-TACAGATCTAGT-----ATAGTGCCTTTTTCGCTCCACAAGGATCAAGATCAAATGAATGTTTCATTCTCTT-----  
TCTGTC---GAACGGGGATCTATTTCT-----GACCTC-----TCAGTACTAATGATCGA-----  
-----  
-----GTGAGACACAAATTGTTTAGTTTCGGATCTG---TCTGGTAAA-----  
-AAGAGGGGGGGGATT-----CTT-----GATTAT---TCA---GGCCCT-----  
GATCGAATCATATCCAATGGTCATGGTCATTGGAATTTTCATATATCCTGCCATTCTCCACGAGAATTCTGAT-----  
TTATTGGCGAAGAGACGAAGAAATAGGTTTCATCATTCCATTCCAA-----TATGATCAAGAA-----  
CGAGAGAAAGAACTAATG---CCCCGGTCT-----  
GGTATCTCGATTGAAATACCCATAAATGGTATTTTTCGTAGAAAGAGTATTCTTGCTTATTTTCGACGATCCTCGATACAG  
AAAG-----AGCAGTTCAGGAATT-----  
-----  
-----ACTAAATATGGGACCATAGAGGTGGATTCA-----  
-----  
ATCGTCAAAAAAGAGGATTTG---ATTGAGTATCGAGGAGCAAAAAGAATTTAGGCCGAAATAC-----  
CAAATGAAAGTGGATCGATTCTTTTTTCATTCCCAGAAGTGCATATCTTAACCGGATCTTCGTCC---  
ATAATGGTACGGAACAATAGTATCATTGGAGTGGATACACGAATCGCTTTAAATACA-----  
AGAAGCCGAGTAGGGGATTGGTCCGAGTGGAGAAAAAAAAAAAAAAAAAGGATT---  
GAACTGAAAATATTTTCAGGAGATATCCATTTTCTGGAGAGACAGATAAG-----  
ATATCCCGGCACAGCGGCATCTTGATA-----CCACCAGGAACGGGAAAAAAAA---AAT-----

CCTAAGGAATCA-----AAAAAATGG-----AAAAATTGGATCTATGTACAACAG-----ATCACACCTACCAAG--

Citrus ACCTGTTCTTCTCCCGAGTTGAGGCCTATCATTCAAATAGATGGAGGTAAACTAATGAGTTCA--

GATATTAATGAACTCTATAGAAGAGTTATCTATCGGAACAATACTCTTATCGACCTATTAACAACAAGTAGATCTACGCC  
AGGGGAATTGGTAATGTGTCAGGAGAAAATTGGTACAAGAAGCCGTGGATACGCTTCTTGATAATGGAATCCGTGGACAGC  
CAATGAGGGATGGTCATAATAAGATTTATAAGTCGTTTTTCAGATGTAATTGAAGGAAAAGAGGGGAAGATTTTCGTGAGACT  
CTGCTTGGCAAACGGGTCGATTATTCGGGGCGGTCTGTCAATTGTTGTGGGCCCTCACTTTCATTACATCAATGTGGATT  
GCCTCGCGAAAATCGCAATAGAGCTTTTCCAGACTTTTGTAAATTTGTGGGCTAATTAGACAACACCTTGTCTCGAACATAG  
GAGTTGCTAAGAGTAAAATTCGGGAAAAAGGGCCGATTATCTGGGAAATACTGCAGGAAGTTATGCAGGGACATCCAGTA  
TTGCTGAATAGAGCGCCTACTCTGCATAGATTGGGCGTACAGGCATTCCAGCCATTTTATGGAAGGGCGCGCTATTTG  
TTTACATCCATTAGTTTGTAAAGGGATTCAACGCAGACTTTGATGGGGATCAAATGGCTGTTTCATGTACCCTTATCTTTAG  
AGGCTCAAGCAGAGGCTCGGTTACTTATGTTTTCTCATATGAATCTCTTGTCTCCTACTATTGGAGATCCCATTTCCATA  
CCGACTCAAGATATGCTTATTGGGCTCTATGTATTAACGAGCGGGAATCGTCGAGGTATTTGTGCAAATAGGTATAATAC  
ATGG-----AATCGA-----AGAAAT-----TATCCAGATGAA---AGAATT---GACGAT-----

-----AATAGC-----TATACGTATACGAAA-----

GAACCCCTTTTTTGTAAATTCCTATGATGCAATTGGAGCTTATCGGCAGAAAAGAATCAATTTAGATAGTCCGTTGTGGCT  
T-----CGGTGG---CGATTA-----GATCAACGCCTTATTGCTTCA-----

AGGGAAGCTCCCATCGAAGTTCACTATGAATCTTTGGGTACCTCTCATGAGATTTATGGGCATTATCTAATAGTACGAAG  
TGTAATAAAGAAATTTCTTCTATATACATTCGAACCACCGTGGGCCATATTTCTCTTTATCGAGAAATCGAAGAAGCTA  
TACAAGGGTTTTGCCGGCCTGCTCATATGGTACC-----

-----GAGGTA-----CTTATGGCAGAA---CGGGTGAGTCTGGTCTTT-----

CACAATAAAATGATAGATGGAAGTCCATTAAACGACTTATTAGCAGGTTAATAGATCACTTCCGGAATGGCATATACATC  
CCACATCCTGGATCAAGTAAAGACCCTGGGGTTCAGCAAGCCACTGCTACATCTATTTTCATTAGGCATTGATGATCTTT  
TAACGATACCTTCTAAGCGATGGCTAGTCCAAGATGCTGAACAACAAGTTTTATTTTGGAAAAACACTATCATTATGGG  
AATGTACACGCGATAGAAAAACTACGACAATCCATTGAGATATGGTATGCTACAAGTGAATATTTGCGACAAGAAATGAA  
TCCTAATTTTAGGATGACTGAGCCTTTTAAATCCAGTCCATATAATGTCTTTTTCGGGGGCTAGAGGAAATGCATCTCAAG  
TACACCAATTGGTGGGTATGAGAGGATTAATGTCTGATCCCAAGGGCAAATGATTGATTTACCCATTCAAAGTAATTTA  
CGCGAAGGGCTTTCTTTAACAGAATATATCATTCTTGTATGGAGCCCGCAAGGGGGTTGTGATACCGCTGTCCGAAC  
ATCAGATGCTGGATATCTTACGCGCAGACTTGTGAAAGTAGTTCAACACATTATTGTACGTAGAACAGATTGTGGCACTG  
TCCGAGGAATTTCTGTGAGTCTCAAATCAAATAGG-----

-----ATGATGTCGGAAGGGTTTTTAGCCAAACA-----

TTAATTGGTCTGTATTAGCGGACGATATATATATGGGCCAGCGATCCATTGCCATTAGAAATCAAGATATTGGGATTGG  
ACTTGTCAATCGACTCATAACC-----

CTTCGAACACAAGCAATATCTATTTCGAACCCCTTTACTTGTAGGAGTACATCGTGGATCTGTGATTATGTTATGGTTCG  
GAGTCCGACT-----

CATGGTGACCTGGTTGAATTGGGGGAAGCCGTAGGTATTATTGCGGGTCAATCTATTGGAGAACCAGGGACTCAACTAAC  
ATTAAGAATTTTCATACCGGCGGCGTATTTACGGGGGGCACTGCAGAACATGTACGAGCCCTTCTAATGGTAAAATCA  
AATTCAAT-----

GAGGATTTGGTTCATCCACGCGCACACGTCACGGGCATCCGGCTTTTCTATGTTCTATAGATTTGGATGTAATTATTGA  
GGGTGAAGATATTATGCACAATGTGACTATTCCACCAAAAAGTTTTCTTTTAGTTCAAATGATCAATATGTGCAATCAG  
AACAAGTGATTGCTGAGATTCCGGCGGGGAGCATACTTTGAAT-----

TTTAAAGAGAGGGTTTCGAAAACATATTTATTCTGATTTCAGAGGGGAGAAATGCACTGGAGTACTGATGTG-----  
TACCAT-----

GCACCCGAATTTACATATAGTAATGTCCACCTCTTGCCAAAAACAAGCCATTTATGGATATTGTGCGGGGGTTCA-----

---CGCAGATCTAGT-----GTAGTTTCTTTTTCACTCCACAAGGATCAAGATCAAATGAATATTCTTCTTT-----  
TCTGTC---GAACGAAGAGAGATTTCT-----AGCCTCTCGCTCTCAGTGAATAATGATCAA-----

-----ACGGGACACAAATTTTTTAGTTCTGATTTT---TCTGCTAAAAAA--

---AAA---GGTCGAATT-----CTTGAGATGTCTGATTAT---TCG---GGATTT-----AATAGAATCATAAGTACT--  
-----GGTCATTGTAATCTCATCCATCCTGCAATTTCTCCACGCAAATTCGGAT-----

TTATTGGCAAAAAGGCAAAGAAATGGATTTCTTATTCCATTCCAC-----TCGATTCAAGAG-----  
CAAGAGAAAGAGCTAATG---CCCCATTCA-----

GGTATCTCGATTGAAATACCCGTAAGGGGTATTTTCCGTAGAAATAGTATTCTTGCTTATTTTCGACGATCCTCGATACAG  
AAGA-----AAGAGTTCGGGAATT-----

-----ACTAAATGGGGGACTCTGGGGGCGCATTCA-----

ATCGTTAAAAAAGAGGACTTG---ATTGAGTATCGAGGACTCAAAAAAATTAAGCCAAAATAC-----  
CAAATGAAAATAGATCGCCTTTTTTTCATTCCGGAGGAAGTGCATATTTTTTCCGAATCTTCTTAC---  
CTAATGGTACGGAATAATAGTATCATTGGAGTAGACACACAAATCACTTTAAATATA-----  
CGAAGCCGGGTGGGCGGATTGGTCCGAATGGAGAGAAAAAGGGGAGGGGTT---  
GAACTAAAAATATTTTCGGGAGATATCCATTTTCCCGGAGAGATAGATAAG-----  
ATATCCCAGACAGTGGCATCCTGATA-----CCGCCAGAAAGTGAAAAACA---  
AAACTTAAGGAAGCCACTAAGGAATCA-----AAAAATTG-----AAAAAGTGGATCTATGTTCAACGG-----  
ATCACACCTACAAAG-----

Coffea ACCAGTTCCTCCTCTGAGTTGAGACCTATCATTAGATAGATGGGGTAAACTAATGAGCTCG--  
-

GATATTAATGAACTTTATAGAAGAGTTATCTATCGGAACAACACTCTTACCGATCTATTAACAACAAGTAGATCTACCCC  
AGGAGAGTTAGTAATGTGTCAGGAGAAATTAGTACAAGAAGCGGTGGATACACTTCTGGATAATGGAATTCGCGGCCAAC  
CAATGAAGGATGGTCATAATAAAGTTTACAAGTCATTTTCAGATGTAATTGAAGGCAAAGAAGGAAGATTTTCGCGGACT  
CTGCTTGGCAAACGAGTCGATTATTCAGGGCGTTCGGTATTGTTGTGGGTCTTCACTTTTATTACATCGATGTGGATT  
GCCGCGAGAAATAGCAATAGAACTTTTCCAGACATTTGTAATTCGTGGTCTAATTAGACAACATCTTGCTTCGAACATAG  
GAGTGTGTAAGAATAAAATTCGGGAAAAAGAACCATTGTATGGGAAATACTTCAGGAAGTTATGCAGGGGCATCCCGTA  
TTGCTGAATAGAGCACCAACTCTGCATAGATTAGGCATACAGGCATTCAGCCCGTTTTAGTAGAAGGGCGTGCTATTTG  
TTTACATCCATTAGTTTGTAAAGGATTCATGAGATTTTGTATGGGATCAAATGGCTGTTTATGTTTACTTTTGG  
AAGCCCAAGCGGAGGCTCGTTTACTTATGTTTTCTCATATGAATCTTTTGTCTCCAGCTATTTGGGATCCCATTTTCAGTA  
CCAACTCAAGATATGCTTATGGGGCTCTATGTATTAACGAGCGGGAATCGTCGAGGTATTTGTGTAAATAGATATAATCC  
ATGG-----AATCGC-----AGAAAC-----TATCAAATAAA---AAAAGT---GACAAT-----  
-----AATAAC-----TATGAGTATACGAAA-----

GAACCTTTTTTTGTAATTCCTATGATGCAATTGGAGCTTATCGTCAGAAACGAATCAATTTAGATAGTCTTTTGTGGCT  
C-----CGGTGG---CCACTA-----GACCAACGCGTTATTGCTTCA-----  
AGAGAAATTCCTATTGAAGTTCATATGAATCTTTAGGGATTTATTATGAGATTTATGGACACTATCTAATAGTAAAAAG  
TATAAAAAAAGAAATCTTTTTCTATATATTCGAACCACTGTTGGTCATATTTCTCTTTATCGAGAAATTGAAGAAGCCA  
TACAGGGGTTTTCTCATGCCTGTTTCATACGGTACC-----  
-----ATGGAGGTA-----CTTATGGCCGAA---CGGGCCAATCTGGTCTTT--  
-----

CACAATAAATCGATAGACGGAACTGCCATGAAACGACTTATTAGTCGATTAATAGATCACTTCGGAATGGCATATACATC  
ACACATCCTGGATCAAGTAAAACTCTGGGTTTTAAACAAGCTACCGCTACATCCATTTTATTAGGAATTGATGATCTTT  
TAACAATACCCTCAAAGGGATGGCTAGTTCAAGATGCTGAACAACAAGTTTGGATTTTGGAAAAACACCACCATTATGGG  
AATGTACACGCAGTAGAAAAATTACGCCAATCCATTGAAATATGGTATGCTACAAGTGAATATTTGCGACAAGAAATGAA  
TCCTAATTTTAGGATGACTGACCCTTTTAAATCCAGTTCATATAATGTCTTTTTTTCAGGAGCTAGAGGAAATGTATCTCAAG  
TACATCAATTAGTAGGTATGAGAGGATTAATGTCTGATCCTCAAGGACAAATGATTGATTTACCCATTCAAAGCAATTTA  
CGCGAAGGACTCTCTTTAACAGAATATATCATTTCTTGCTACGGAGCCGTAAAGGGGTTGTGGATACTGCTGTACGAAC  
ATCAGATGCTGGATATCTCACGCGCAGACTTGTGAAGTAGTTCAACACATTGTTGTACGCCGAACAGATTGTGGCACCG  
TCCGGGGTATTTCTGTGAGTCTCCG-----AATGGG-----  
-----ATGATGCCCGAAAAATTTTTTATTCAAACA-----  
TTAGTTGGTCGTGTATTAGCAGATGATATATATATGGGTCTCGATGATTGCCACTAGAAATCAAGACATTGGGATTGA  
ACTTGTAATCGATTACATAACC-----  
TTTCGAGCCCAACCAATATCTATTCGAACCTCCCTTTACCTGTAGGAGTACATCTTGGATCTGTGATTATGTTATGGCCG  
GAGTCCTACT-----  
CATGGCGACCTGGTTGAATTGGGAGAAGCTGTAGGTATTATTGCAGGTCAATCGATTGGAGAACCGGGTACTCAATTAAC  
ATTAAGAATTTTTATACCGGCGGAGTATTTGCAGGAGGTATTGCAGAACATGTGAGAGCTCTTCTAATGGAAAAATAA  
AATTAAT-----

GAGGATTTAGTTTCATCCGACACGTACACGTACATGGACACCCCGCCTTTCTATGTTTTATAGACTTGTATGTAACATTTAA  
GAGTGAAAATATTCTACATAATGTGAATATTTCCACCCAAAAGTTTTCTTTTAGTTCAAAAATGATCAATATGTAGAAGCAG  
AACAGGTGATTGCTGAAATTCGTGCGGGAACATCTACTTTGAGT-----  
TTCAAAGAGAAGGTTTCGAAAACATATTTATTCTGACTCAGACGGAGAAATACACTGGAGTACCGATGTG-----  
TATCAT-----  
GCGCCCAATTTACATATGGTAATGTGCATCTATTACCAAAAACAAGTCATTTATGGATATTATTAGGAGGGCCG-----  
-TGCAGATCGAGT-----CTAGTCTCCCTTTTCGCTTCCACAAGGATCAAGATCAAATGAACACGCATTCTCTT-----  
TCTGTA--AAGCGAAGATATACTTAT-----AAACTC-----TCAGTAACGAATGATCGG-----  
-----  
-----GTGAGGTACAAAATCTTTAGTTCGGATTTT---TATGGTAAA-----  
-AAAAAAATAGGATT-----CCT-----GATTAT---TTA---GACCTT-----AATCGAATCATATGTACT--  
-----GGTTATTGTAATCGCATATATCCGGCCATTCTTCACGAGAATTCTGAT-----  
TTATTGTCAAAGAGGGCGAAGAAATAGATTTATTATGCCACTCCAA-----TCGATTCAAGAA-----  
CGCGAGAACGAA-----TCCCA-----  
GGCATCTCGATTGAAATCCCATAAATGGAATTTTCCGTAGAAATAGTATTCTTTCTTATTTTCGACGATCCTCGATATAG  
AAGA-----AAGAGTTCGGGAATT-----  
-----  
-----  
-----ACTAAATATGGGACTATCGAAATGCATTCA-----  
-----  
CTCGTCAAAAAGGAAGATTTG---ATTGAGTATCGAGGGGTAAAGGAATTTAGGCCAAAATAC-----  
CAAATGAAAGTAGATCGATTTTTTTTTTTCATTCCCGAGGAAGTGCATATCTTACCCGGATCTTCTTCC---  
ATAATGGTACAGAACAATAGTATCATTGGAATAGATACACAAAATTTAAATATA-----  
AGAAGCCGAGTGGGTGGGTGGTCCGGGTGGAGAGAAAAAAAAAAAGGAATT---  
GAACTTAAAATCTTTTCTGGAGATATCCATTTTCTTGAGAGACAGATAAA-----  
ATATCCCGACATAGCGGCGTTTTGATACCGCTACCACCAGGAACGGGAAAAATA---AAT-----  
TCCAAGGAATCA-----AAAAAATTG-----AAAAATTGGATCTATGTCCAACGG-----ATTACACCTAGCAAA--  
-----  
-----  
Cucumis           ACCTGTTCTTCCCTCCCGAGCTGAGACCGATCATTTCAGATAGATGGGGGTAAACTAATGAGCTCG--  
-  
GATATTAATGAACTCTATAGAAGAGTTATATATCGGAACAATACTCTTATTGATCTATTAACAACAAGTAGATCTACGCC  
AGGAGAATTAGTAATGTGTAGGAGAAAATTTGGTACAAGAAGCCGTGGATACACTTCTTGATAATGGAATCCGCGGACAAC  
CAATGAGGGATGGCCATAATAAGGTTTACAAGTCGTTTTCTGATGTAATTGAAGGCAAAGAGGGGAAGATTTTCGGGAGACT  
CTGCTTGGCAAACGGGTTCGATTATTCAGGACGTTCTGTGATTGTTGTAGGGCCCTCACTTTTCATTACATCGATGTGGATT  
GCCTCGCGAAATCGCAATAGAGCTTTTTCCAGACATTTTTAATTCGTGGTCTAATTCGACAACATTTTGCTTCGAACATAG  
GAGTTGCTAAGAGTAAAATTCGGGAAAAAGAACCATTGTATGGGAAATACTTCAGGAAGTTATGCAGGGGCATCCCGTA  
TTGCTAAATAGAGCGCTACTCTGCATAGATTAGGCATCCAGGCCTTCCAACCTATTTTAGTGGAAGGACGTGCTATTTG  
TTTACATCCATTAGTTTGTAAGGGATTCAATGCAGACTTTGATGGGGATCAAATGGCTGTTTCATGTACCTTTATCTTGGG  
AGGCTCAAGCAGAGGCGCGTTTACTTATGTTTTCTCATATGAATCTCCTGTCTTCAGCTATTGGGGATCCCATTTCTGTA  
CCAATCAAGATATGCTTATTGGACTCTATGTATTAACGAGCGGGAATCGCCGAGGTATTTGTGCAAATCGGTATAATCC  
ATCT-----AATCGC-----AAAAAT-----CATAAAAATGAA---AAAATT---TACAAT-----  
-----AATAAC-----TATAAATATACGAAA-----  
GAACCCTTTTTTTGTAAATTCCTATGATGCAATTGGAGCTTATCGCCAGAAAAGGATCAATTTAGATAGTCCTTTGTGGCT  
C-----CGATGG---CGACTA-----GATCAACGCGTTATTGCTTCA-----  
AGAGAAGCCCTATCGAAGTTCATATGAATCTTTGGGTACCCATCATGAGATTTATGGGTACTATCTAATAGTCAAAG  
TATAAAAAAGAAATTCTTTGTATATACATTCGAACCACTGTTGGTCATATTTCTCTTTATCGAGAAATCGAAGAGGCTA  
TACAAGGATTTTGCCGGCCTGCTCATATGGTACC-----  
-----ATGGAGGTA-----CTTATGGCGGAA---CGGGCCGATCTGGTCTTT--  
-----  
CACAAATAAGTGATAGATGGAAGTCCATTAACGACTTATTAGCAGATTAATAGATCACTTCGGAATGGCATATACATC  
ACACATCCTGGATCAACTAAAGACTCTGGGGTTCCAGCAGGCCACTGCTACATCCATTTTCATTAGGAATTGATGATCTTT



TAACAATCCCTTCTAAGGGATGGCTAGTCCAAGATGCTGAACAACAAAGTTTGATTTTGGAAAAACACCATCATTATGGA  
AACGTACACGCAGTAGAAAAATTACGCCAGTCCATTGAGATATGGTATGCTACAAGTGAATATTTGCGACAAGAAATGAA  
TCCTAATTTTAGGATGACTGACCCTTTAATCCAGTCCATATAATGTCTTTTTCGGGAGCTCGAGGAAATGCATCTCAAG  
TACACCAATTAGTAGGTATGAGAGGATTAATGTGAGATCCACAAGGACAAATGATTGATTTACCCATTCAAAGCAATTTA  
CGTGAGGGGCTGTCCTTAACCGGAATATATAATTTCTTGCTACGGAGCGCGGAAAGGAGTTGTGGATACTGCTGTACGAAC  
ATCGGATGCTGGATATCTTACACGTAGACTTGTGGAAGTAGTTCAACACATTGTTGTACGTAGAACCATTGTGGAACCA  
TCCGAGGGATTTTAGTGAGTCCTGGA-----AATAGG-----  
-----ATGATTCCGGAAAGAATTTTTATCCAAACA-----  
TTAATTGGTCGTGTATTAGCGGACGATATATATATGGGCCCGCGATGCATTGGCGTTCGAAATCAAGATATTGGTATTGG  
ACTTATTAATCGATTATAACC-----  
TTTCAAACACAACCAATATCTATTCCGACTCCCTTTACTTGTAGGAGTACATCTTGGATCTGCCGATTATGTTATGGACG  
AAGTCCTACT-----  
CACGGGGACCTGGTTCGAATTGGGAGAAGCCGTAGGTATTATTGCGGGTCAATCTATTGGAGAACCAGGACTCAACTAAC  
ATTAAGAACTTTTCATACCGGCGGAGTATTCACAGGGGGGACTGCAGAACATATACGAGCTCCTTCTAATGGCAAATAA  
AATTCAAT-----  
GAGGATTTGGTTCATCCACACGTACACGCCATGGGCATCCTGCTTTTTTATGTTATATAGACTTGTATGTAACTATTGA  
GAGTGAGGATATTATACATAACGTCACTATTCCACCAAAAAGTTTACTTTTTAGTTCAAACGATCAATATGTAGAATCAG  
AACAAAGTGATTGCTGAGATTTCGCGCGGGAACATACTCTTAAT-----  
TTAAAAGAGAGAGTTCGAAAACATATTTATTCTGACTCAGAGGGAGAAATGCATTGGAGTACCGACGTG-----  
TACCAT-----  
GCACCCGAATTTACATATAGTAATGTCCATCTCTTACCAAAAACAAGTCATTTATGGATATTATCAGGAGGTTTCG-----  
-TGCGGATGCAGT-----CTAGTCCCTTTTTCACTCTACAAGGATCAAGATCAAATTAACGTTTATTCTCTT-----  
TGTGTC---GAAAGAAGATATATTTCT-----AGCCTT-----TCAGTAAATAATGATAAA-----  
-----  
-----GTGGGACAAAAATTTTATGGTCCGGATCTC---TCTGGTAAA-----  
-AACGAAAACGGAATT-----CCT-----GATTAT---TCA---GAACTT-----AATCCAATCCTATGTACG-  
-----GGTCAATCTAATCTCACATATCCTGCTATTTTCCATGGTAATTTCTGAT-----  
TTATTGGCAAAGAGGCGAAGAAATGGATTTCATTTCAATTTGAA-----TCACTTCAAGAA-----  
CGAGAAAAAAGAACTACGA---CCCCCTTC-----  
GGTATTTTCGATTGAAATACCCATAAATGGTATTTTTCGTAGAAATAGTATTCTTGCTTTTTTTCGATGATCCTCAATACAG  
AAGA-----AATAGTTCAGGAATT-----  
-----  
-----ACTAAATATGGGACTATAGGGGTGCATTCA-----  
-----  
ATCCTCAAAAAAGAGGATTTG---  
ATTGAGTATCGAGGAGTCAAAGACTTTAAGCCAAAATACCAAATGCAAATGAAAGTGGATCGATTTTTTTTTCATTCCCGA  
GGAAGTGCATATTTTACCTGAATCTTCTTCC---  
ATAATGGTACGGAACAATAGTATCATTGGAGTAGCTACACGACTAACTTTAAGTATA-----  
AGAAGCCGAGTAGGCGGATTGGTCCGAGTGGAGAAAAAAAAAAAAAAAAAGGATT---  
GAACTCAAAATATTTTCTGGAGATATACATTTTCTGGAGAGATGGATAAG-----  
ATATCCCACACAATGGGATCTTGATA-----CCACCAGAAAGAGTAAAAAAA---AAT-----  
TCTAAGAAATCA-----AAAAAATCG-----AAAAATTGGATTTATGTCCAGTGG-----ATCACACCTACCAAG--  
-----  
-----  
Daucus ACCTGTTCTTCTCCTGAGTTAAGACCGATCGTTTCCAGATAGACGGGGGTAAACTAATGAGCTCG--  
-  
GATATTAATGAACTCTATAGAAGAGTTATATATCGGAACAATACTCTTACCGACCTATTAACAACAAGTAGATCTACGCC  
AGGAGAGTTAATAATGTGTGTCAGGAGAAATTGGTACAAGAAGCCGTGGATACACTTCTTGATAATGGAATCCGTGGACAAC  
CGATGAGGGACGGCCATAATAAAGTTTACAAATCATTTTTCGGATGTAATTGAAGGCAAAGAGGGGAAGATTTTCGCGAGACT  
TTGCTTGGCAAACGAGTCGATTATTCAGGGCGTTCCGTCATTGTGCTGGGCCCTCACTTTTATTATCAATGCGGATT  
GCCCGCGAAATAGCAATAGAGCTTTTCCAGACATTTGTAATTCGTAGTCTAATTAGACAACAGCTTGCTTCGAATATAG

GAGTTGCTAAGAGTAAAATTCGGGAAAAAAAAACCGATTGTATGGGAAATACTTCGGGAAGTTATGCGGGGGCATCCTGTA  
TTGTTAAATAGAGCACCTACTCTGCATAGATTAGGTATACAGGCATTCCAGCCTGTTTTAGTGGAGGGTCGTGCTATTTG  
TTTACATCCATTAGTTCGTAAAGGATTCAATGCAGACTTTGACGGGGATCAAATGGCTGTTTCATGTGCCTTTATCTTTTG  
AGGCTCAAGCGGAAGCACGTTTACTTATGTTTTCTCATATTAACCTTTTATCTCCGGCGATTGGGGATCCTATTTCCGTA  
CCAACCTCAAGATATGCTTATTGGACTCTATGTCTTAACGAGCGGGAATCGTCGAGGTATTTGTGTAATAGGTATAATCC  
ATCT-----AATCAC-----AGAAAT-----CAAATAAA---AGAATT---TATGAG-----  
-----ATAAC-----  
TATAAGTATACGAAAGAAAAAGAACCTTTTTTTTGTAACTTCTTATGATGCAATTGGAGCTTATCGGCAGAAACGAATCAA  
TTTAGATAGTCCTTTGTGGCTC-----CGGTGG---CGGCTA-----GATCAACGCGTTATTGCTGCA-----  
AGAGAAGCTCCTCTCGAAGTTCACATGAATCTTTGGGTACCTATTATGATATTTATGGGCAATATCTAATAGTAAGAAG  
TATAAAAAAGAAATCTTTCTATATATATTCGAACTACTGTTGGTCATATTTGATTTATCGAGAAATCGAAGAAGCTA  
TACAGGGGTTTTGTGAGCCTGT-----  
-----ATGGAGGTA-----CTTATGGCAGAA---CGGGCCAATCTGGTCTTT--  
-----  
CACAATAAAGTGATAGACGGAAGTCCATGAAACGACTTATTAGTAGATTAATAGATCACTTCGGAATGGCATATACGTC  
ACACATCCTGGATCAAGTAAAGACTTTGGGTTTTCAACAAGCTACTGCTACATCCATTTTATTAGGAATTGATGATCTTT  
TAACAATCCCATCTAAGAGATGGCTAGTTCAGATGCTGAGGAACAAAGTTTCATTTTGGAAAAACACCACCATTCTGGG  
AATGTACATGCAGTAGAAAAATTACGCCAATCCATTGAGATATGGTATGCTACAAGTGAATTTTTGCGACAAGAAATGAA  
TCCTAATTTTAGGATGACTGACCCTTTAATCCAGTACATATAATGTCTTTTTTCAGGAGCTAGAGGAAATGCGTCTCAGG  
TACATCAATTAGTAGGTATGAGAGGATTAATGTCGGATCCCCAAGGGCAAATGATTGATTTACCCATTCAAAGCAATTTA  
CGCGAAGGACTCTCTTTAACAGAATATATATTTCTTGCTACGGAGCCCAGGAGGGGATTGTGGATACTGCTGTACGAAC  
TTCAGATGCTGGATATCTCACGCGCAGACTTGTGAGGTAGTTCAACACATTGTTGTACGTCGAAAAGATTGTGGCACCG  
CCCAGGATTTCTGTGAGTCTTGGG-----AACGGG-----  
-----ATGATGTCGGAAAATATTTTTATCCAAACA-----  
TTAATTGGTCGTGTATTAGCGGATGATATATATATGGGTACACGATGTATTGCCACTAGAAATCAAGATATTGGTAGTGG  
ACTTGTCAATCAATTCATAACC-----  
TTTCGAGCACAACCCATATATATTCGAACTCCCTTTACTTGTAGGAGTACATCTTGGATCTGTCAATTATGTTATGGCCG  
GAGTCCCTACT-----  
CATGGTGACCTGGTTCGAATTGGGAGAAGCTGTGGGTATTATTGCGGGTCAATCTATTGGAGAGCCCGGCACTCAATTAAC  
ATTAAGAACCTTTTCATACCGGCGGAGTATTTACAGGGGGTATTGCAGAACATGTACGAGCCCCCTCTAATGGAAAAATA  
AATTCAAT-----  
GAGGATTTAGTTCATCCGACACGTACACGTCATGGGCATCCTGCTTTTTGTGTGTTCTATAGATTTGTACGTAACCTATTGA  
AAGTGAGGATATTCTACATAATGTGAATATTCACCCAAAAGTTTTCTTTTAGTTCAAAATGATCAATATGTAGAATCAG  
AACAAAGTGATTGCTGAGATTTCGCGCAGGAACATCCACTTTGAAT-----  
TTTTAAAGAGAAGGTTTCGAAAACATATTTATTCTGATTTCAGAGGGAGAAATGCATTGGAATACCGACGTG-----  
TATCAT-----  
GCACCTGAATTTACATATGGAAATGTTTCATCTCTTACCAAAAACAAGTCATTTATGGATATTATTAGGAGAGCCG-----  
-CGCAGATCTGAT-----CTAATCTCCCTTTTCGATCCACAAGGATCAAGATCAAATGAACGCTCGTTCTTTT-----  
TCTGTC---AAGAAAAGATCTATTTTCG-----AACCTC-----TCGGTAACTAATGATCAA-----  
-----  
-----GTGAGACACAAATTCTTTAGTTCGGATTTT---TTTGGTAAA-----  
-AAAGAAGAAGAACAC-----CCT-----GATTAT---TCA---GAACTT-----AATCGAATTGTT-----  
-----CGTTGTAATCTCAGATATCCGACCATTCCATACGCCGATTATGAT-----  
TTATTGGCAAAGAGACGAAGAAAAAGATTTCATTATTTCCACTCCA-----TCGATTCAAGAA-----  
CGTGAGAACGAACATAATG---CCTCCTTCG-----  
GGAATCTCGATCGAAATACCCATAAATGGTATTTTTTCGTATAAATAGTATTCTTGCTTTTTTTCGATGATCCTCGATACAG  
AAGA-----AAGAGTTCGGGAATT-----  
-----  
-----ACTAAATATGGCACTATAGAAGTCGATCCA-----  
-----  
ATCGCCAAAAAAGAGGATTTA---ATTGAGTATCGAGGAGTCAAGGAGTTTTAAGCCAAAATAC-----  
CAAATAAAGTGGATCGGTTCTTTTTTTCATTTCCGAGGAAATGCATATCTTACCTGGATCTTCTTCC---

ATAATGGTACGAAACAATAGTATTATTGGGATAGATACACAAATAGCTTTAACTACA-----  
AGAAGCCGAGTCGGCGGATTAGTTTCGAGTGGAGATAAAAAAAAAAAGAATT---  
GAACTAAAAATATTTTCTGGAGATATCCATTTTCTGGAGAGACAGATAAG-----  
ATATCTCGACATAGTGGTGTCTTGATA-----CCACCAGGAACGGGAAAGACA---AAT-----  
TCGAAAGAATCC-----AAAAAAGGG-----AAAAACTGGATCTATGTCCAACGG-----ATCACACCTACCAAT--  
-----  
-----

Dioscorea ACCAGTTCTTCCCTCCCGAGTTGAGACCAATCATTTCAGATAGATGGAGGTAAATTAATGAGTTCG--  
-

GATATTAATGAACTCTATAGAAGAGTTATCTATCGGAACAATACTCTTACCAGTCTATTAGCAACAAGTAGATCTATGCC  
AGGTGAATTAGTAATGTGTGTCAGGAGAAATTGGTACAAGAAGCCGTGGATACACTTCTTGATAATGGGATCCGTGGGCAAC  
CCATGAAAGATGGTCATAATAAAGTTTACAAGTCATTTTTCAGATGTAATTGAAGGCAAAGAGGGGAAGATTTTCGTGAGACT  
CTCCTTGGCAAACGGGTCGATTATTCGGGACGTTCTGTCAATTGTTGTGGGTCCTTCGCTTTTATTACATCAATGTGGATT  
ACCTCGCGAAATAGCAATAGAGCTTTTCCAAACATTTCTAATTCATGGTCTAATTAACAACATGTTGCTTCTAACATAG  
GGATTGCTAAAAGTAAAATTTCGGGAAAAAGAACCAATTGTATGGGAAATACTTCAAGAAGTTATGCGGGGGCATCCTATA  
TTGTTGAATAGAGCACCTACCCTGCATAGATTGGGTATACAGGCGTTCCAACCCATTTTAGTAGAGGAACGTGCTATTTG  
TTTACATCCATTAGTTTGTAGAGGCTTCAATGCAGACTTTGATGGGGATCAAATGGCTGTTTCATGTACCTTTATCTTTGG  
AAGCTCAAGCGGAGGCTCGTTTACTTATGTTTTCCCATATGAATCTCTTGTCTCCAGCTATTGGAGATCCCATTTCCGTA  
CCAACCAAGATATGCTTATTGGGCTCTATGTATTAACGATCGGGAATCGTCGAGGTATTTGTGCAAATAGGTATAATAC  
ATAT-----AATTGC-----AGAAAT-----TCGCAAATAAA---ATACTT---AACAA-----  
-----AATAAG-----

TATAACTATATAAAAATGAAAGCGACGTTATTGTTGTAGTTTCTATGATGCACCTGGAGCTTATCGGCAAAAACGAATCGA  
TTTAGATAGTCCTTTGTGGCTC-----CGGTGG---CGACTA-----GATCAACGTGTCATTGGCTCA-----  
AGAGAAGTTCCCATCGAAATTCATATGAATCTTTGGGTACTTATCATGAGATTTATAGGCACTATCTAATTGTAAGAAG  
TGTAATAAAAAAAAAATTTCGTTGGATATACATTCGAACCACCATCGGTTCATATTTCTTTTTATCGAGAAATAGAAGAAGCCG  
TACAGGGGTTTTGTTGGGCCTATTCATACGTTATT-----  
-----ATGGGGGTA-----TTTATGACGGAA---CGGGCTGATCTGGTCTTT-----  
-----

CACAATAAAGTGATAGATGGAAGTCTATGAAACGACTTATTAGCAGATTAATAGATCATTTCGGAATGGGATATACATC  
ACATATCCTGGATCAATCGAAGATTCTGGGTTTCCAGCAAGCCACTGCTACGTCTATTTTCATTGGGGATTGATGATCTTT  
TAACAATACCTTCTAAGGAATGGTTAGTCCAAGACACTGAACAACAACGTTTTATTTTGGAAAAACACTATCATTATGCG  
AATGTACACGCGGTAGAAAAATTACGTCAATCCATTGAGATATGGTATGCTACAAGTGAATATTTGAGACAAGAAATGAA  
TCCTAATTTTTCGTATGACTGATCCTTCTAATCCAGTCCATTTAATGTCCTTTTTCGGGAGCTCGAGGAAATGCATCTCAGG  
TACACCAATTAGTGGGTATGAGAGGATTAATGTCAGATCCCCAAGGACAAATGATTGATTTACCCATTCAAAGCAATTTA  
CGCGAAGGACTTTCTTTGACGGAATATATAATTTCTGCTACGGAGCCCGCAAAGGCGTTGTAGATACTGCTGTACGAAC  
ATCAGATGCTGGATACCTCACGCGTAGACTTGTGTAAGTAGTTCAACACATTATTGTACGTAGAACGGATTGTGGTACTA  
TCCGAAGTATTTCCGTGAGTCCTCGA-----AAAGGG-----  
-----ATGACGGAAAAAATTTTTGTCCAAACA-----

TTAATTGGTCGTGTATTAGCAGACGATATATATATGGGTCTACGATGCATTGCCGTTTCGAAAGCAAGAGATTGGGATTGG  
ACTTGCCAATCGATTAATAACT-----  
TTTCGAGCACGACCAATATATATTTTGAACCCCTTTTACATGTAGAAGTACATCTTGGATTTGTCAATTATGTTATGGTTCG  
AAGTCCCCT-----

CATGGTGACCTGGTTGAATTGGGAGAAGCCGTAGGTATTATTGCGAGTCAATCAATTGGGGAACCGGGGACTCAACTAAC  
ATTAAGAATTTTTCATACCGGTGGTGTATTTACAGGCGGTACTGCCGAACATGTACGAGCTCCTTCCAGTGGAAAAATCA  
AATTCAAT-----

GAGGATTTGGTTTCATCGCACACGTACCCGTCATGGACATCCTGCTTTTTTATGCTCTATAGGCTTGTATGTAACCTTTGA  
GGGTGCGGATATTATACATAATCTGAATATTTCCACCAAAAGGTTTTGATTTTAGTTCAAATGGTCAATATGTGGAATCAG  
AACAAATTGATTGCCGAGATTCGTGCCGGAGCATTCACTTTAAAT-----  
TTTAAAGAGAGGGTCCGAAAGCATATTTATTCTGAATCAGAGGGGGAAATGCCTGGAGTACCAATGTA-----  
TACCAT-----

GCACCCGAATACCCATATGGTAATATTCATTTTACTAAAAACAAGTCATTTATGGATATTAGCAGGAGCGTCA-----  
-CGTAGATCCAGT-----ATAGTGTCTTTTTCGCTCCACAAGGATCAAGATCAAATGAATGTTTCATTCTTTT-----  
TCTGTC---GAAGAAAGATATATCTATATCTTTGACCTC-----TCAATGACTAATCATCGA-----  
-----  
-----

-----GTA AACATAAATTGTTG-----GATACT---TCTGGTAAA-----

-AAAGATAGAGAAATT-----CTT-----GAATAT---TCA---ATATCT-----GATCGAATCATATCCAAT-  
-----GGTCATTGGAATTTAATATCTCCTTCTATTCTTCAAGATAATTTGGAT-----  
TTCTTGGCGAAAAGGCGAAGAAATAGATTTCATCATCCATTACAA-----TATGATCAAGAA-----  
CGAGAGAAAAGAACTAATA---CCCTGTTTT-----  
GATATTTCTATTGAAATACCCATAAATGGTATTTTACGTGGAAATAGTATTCTTGCTTATTTTCGATGATCCAGTATATAG  
AAGA-----AGCAGTTCAGGAATT-----

-----ACTAAATATGGGACCTTAGAGGTAGATTCA-----

ATTGTAATAAAGGAAGATTTG---ATTGAGTATCGAGGAACAAAAGAATTTAAC---CAAATA-----  
CAAATAAAGTAGATCGCTTTTTTTTTCATTCCCAGAGGGTGCATATCTTACCTGGATCTTCGTCC---  
ATAATGGTCCGGAACAATAGTCTCATTGGAGTACATACACGACTCACTTTAAATACA-----  
AGAAGCAAAATAGGCGGATTAGTCCGAGTGGAGAGAAAAAAAAAAGTATT---  
GAACTGAAAATCTTTTCTGGAAATATCCATTTTCTGGAGAGACAGATAAG-----  
ATATCCAGGCACAGCGGCATCTTGATA-----CCCCAGGAACAGGAAAGAAA---AAT-----  
TTTAATCAATCAAAA---AAAGAATTG-----AAAAATTGGATTTATGTTCAACGA-----ATCACACCCACCAAG--

Drimys ACCAGTTCTTCTCCGGAGTTGAGACCAATCATTTCAGATAGATGGGGGTAAACCAATGAGTTCG--

GATATTAATGAACTCTATCGAAGAGTTATCTATCGGAACAATACTCTTACCGATCCATTAACAACAAGTAGATCTACGCC  
AGGGGAATCAGTAATGTGTCCAGGAGAAATGGTACAAGAAGCCGTAGATACACTTCTTGATAATGGGATCCGCGGGCAAC  
CAATGAGGAATGGTCATAATAAAGTTTACAAGTCGTTTTTTCAGATGTAATTGAGGGCAAAGAGGGAAGATTTCTGTGAGACT  
CTACTTGGTAAACGGGTCGATTATTCGGGGCGTTCCGTCATTGTCGTTGGGCCCTTCGCTTTTTCATTACATCGGTGTGGATT  
ACCTCGAAGAAATAGCAATAGAACTTTTCCAGACATTTGTCATTGTCGTTGGTCTAATCAGACAACATATTGCTTCCAACATAG  
GGATTGCAAAAAATAAAATTCGGGAAAAAGAACCAATTGTATGGGAAATACTTCAAGAAGTTATGCAGGGGCATCCCATA  
TTGCTGAATAGAGCACCCACCCTGCATAGATTAGGCATACAGGCGTTCCAACCTATTTTTCAGCGAGGGACGTGCTATTTG  
TTTACATCCATTAGTTTCGTAAGGGATTCAATGCAGACTTTGATGGGGATCAAAATGGCTGTTTCATGTACCTTTTATCTTTGG  
AAGCTCAAGCAGAGGCTCGTTTACTTATGTTTTTCTCATATGAATCTCTTGTCTCCAGCTATTGGGGATCCCATTTCCATA  
CCAACCAAGATATGCTTATTGGACTCTATGTATTAACGATCGGAAATCGTCGAGGTATTTGTGCAAAATAGGTATAATCC  
ATGG-----AATCGC-----AGAAAC-----TATCAAAATAAA---ACAGTT---TACGAG-----

TATAATAATAACTATAGGTATACTAAAGAAAAAGAACCCTATTTTTGTAGTTTCTATGATGCATTGGAGCTTACCGGCA  
GAAACGAATCAATTTAGATAGTCCTTTGTGGCTC-----CGGTGG---CGACTA-----  
GATCAACGTGTCATTGCCCA-----  
AGAGAAGTTCCCATCGAAGTTCAATATGAATCTTTGGGTACCTATCATGAGATTTATGGGCACTATCTACTAGTAAGAAG  
TGTCAAAAAAGAAAGCCTTTGTATATACATTCGAACCACTGTTGGTCATATTTCTTTTTATCGAGAAATAGAAGAAGCCA  
TACAGGGGTTTTGCCGAGCCTACTCA-----  
-----ATGGAGGTA-----CTTATGGCGGAA---CGGGCCGATCTGGTCTTT-----

CACAATAAAGTGATAGATGGAAGTCCATGAAACGACTTATTAGTAGATTAATAGATCACTTCGGAATGGCATATACATC  
ACACATACTGGATCAAGTAAAGACTATGGGTTTTCCAGCAAGCCACTGCTACATCCATTTTATTAGGAATTGATGATCTTT  
TAACAATACCTTCTAAGGGATGGCTAGTCCAAGATGCTGAACAACAAAGTTTGAATTTGGAAAAGCACCATCATTATGGG  
AATGTACACGCGGTAGAAAAATTACGTCAATCCATTGAGATATGGTATGCTACAAGTGAATATTTGAGACAAGAAATGCA  
TCCTAATTTTAGGATGACGGATCCTTCTAATCCAGTCCATATAATGTCCTTTTTCGGGAGCTCGGGGAAATGCATCTCAGG  
TACACCAATTAGTCGGTATGAGAGGATTAATGTCGGATCCCCAAGGACAAATGATTGATTTACCCATTCAAAGCAATTTA  
CGCGAAGGACTTTCTTTAACGGAATATCTCATTCTTGTACGAGCTCGCAAAGGAGTTGTGGATACTGCTGTACGAAC  
ATCAGATGCTGGATACCTCACGCGTCGACTTGTGTAAGTAGTTCAACACATTGTTGTACGTAGAACAGATTGTGGCACTA  
TCCGAGGTATTTCCGTGAGTCCTCGA-----AATGGGATTGGG-----  
-----ATGACGGAAAAAATGTTGATCCAAACA-----

CTAATTGGTCGTGTATTAGCAGACGATATATATATGGGTCTACGATGCATTGCCGCTCGAAATCAAGATATTGGGGTTGG  
GCTTGTCAATCGATTTCATAGCC-----

TTTCGAGCACAATCAATATATATATTCGAACCCCTTTATTTGCAGGAGTACATCTTGGATCTGTGCGATTATGTTATGGTCG  
GAGTCCCACT-----  
CATGGTGACCTGGTTCGAATTGGGAGAAGCAGTAGGTATCATTGCGGGTCAATCAATTGGGGAACCAGGGACTCAACTAAC  
ATTAAGAACTTTTCATACCGGTGGAGTATTCACAGGTGGTACTGCAGAACATGTACGAGCCCCCTTTAATGGAAAAATTA  
AATTCAAT-----  
GAGGATTTGGTTTCATCCACACGTACACGTACATGGGCATCCTGCTTTTCTATGTTATATAGACCTGTATGTCACTATTGA  
GAGTCAGGATATTCTACATAATGTGAATATTCACCAAAAAGTTTTCTTTTAGTTCAAATGATCAATATGTAGAATCAG  
AACAAGTGATTGCCGAGATTTCGCGCCAGAACATCCACTTTCAAT-----  
TTTAAAGAGAGAGTTCGAAAACATATTTATTCTGACTCAGAGGGGAGAAATGCACTGGAGTACCGATGTG-----  
TACCAT-----  
GCACCTGAATATACATATGGTAATGTTTCATCTTACCTAAAACAAGTCATTTATGGATATTATCAGGGGGTCCG-----  
-CGCAGATCTAGT-----CTAGTGCCTTTTTTCGCTCCACAAGGATCAAGATCAAATGAACATTCACTTCTT-----  
TCTGTC---GAACAGAGAGAGAGTTC-----GACCTC-----TCAGTACTAATGATCGA-----  
-----  
-----GCGAGACACAAATTGTTTAGTTCCGGATCCT---TCCGGTAAA-----  
-AAAGAGGGAAAGATT-----CTT-----GATTAT---TCA---GGACCT-----GCTCGAATCATATCCAAT-  
-----GGTCATTGGAATTTTCATATATCCTGCCATTCTCCACGAGAATTCTTAT-----  
TTATTGGCGAAAAGGCGAAGAAATAGATTCATCATCCATTCCAA-----TATGATCAAGAA-----  
CGAGAGAAAGAATAATG---CCTCGTTCT-----  
GGTATCTCGATTGAAATACCCATAAATGGTATTTTACGTAGAAATAGTATTCTTGCTTATTTTCGACGATCCCCGATACAG  
AAGA-----AGCAGTTCAGGAATT-----  
-----  
-----ACTAAGTATGGGACTGTAGAAGTGGATTCA-----  
-----  
ATCGTCAAAAAAGAGGATTTG--ATTGAGTATCGAGGAGCAAAGGAATTTAGTCCGAAATAC-----  
CAAATGAAAGTAGATCGATTTTTTTTTTCATTCCCAGAAAGTGCATATCTTACCTGGCTCTTCGTCC---  
ATAATGGTACGGAACAACAGTATCATTGGAGTCGATACACGAATTACTTTAAATACA-----  
AGAAGCCGCATAGGTGGATTAGTCCGAGTGGAGAGAAAAAAAAAAGGATT---  
GAACTGAAAATCTTTTCTGGAGATATCCATTTTCTGGAGAGGCAGATAAG-----  
ATCTCCCGGCACAGCGGCATCTTGATA-----CCACCAGGAACGGGAAAAAAA---AAT-----  
TCTAAGGAATCA-----AAAAAATTG-----CAAATGGATCTATGTCCAACGG-----ATCACACCTACCAAG--  
-----  
-----  
Eucalyptus ACCAGTTCCTCCTCCCGAACTACGACCCATCATTGATAGATGGAGGTAAGCTAATGAGCTCG--  
-  
GATATTAATGAACTCTATAGAAGAGTTATCTATCGGAACAATACTCTTACCGATCTATTAACAACAAGTAGATCTACACC  
AGGGGAATTAGTAATGTGTCAAGAGAAATTGGTACAAGAAGCCGTGGATACACTTCTTGATAATGGAATTCGCGGACAAC  
CAATGAGGGATGGTCATAATAAGGTTTACAAGTCGTTTTTCGGATGTAATTGAAGGCAAAGAGGGGAAGATTTTCGTGAGACT  
CTGCTTGGCAAACGGGTCGATTATTCGGGTCGTTCTGTCAATTGTCTGAGGACCCTCACTTCCATTACATCGATGTGGATT  
GCCTCGGGAAATAGCAATAGAGCTTTTTCAGACATTTGTAATTCGTGGGCTAATTAGACAACATCTTGCTTCGAACATAG  
GAGTTGCTAAGAGTAAAATTCGGGAAAAGGAGCCCATTTGTATGGGAAATACTGCAAGAAGTTATGCAAGGGGCATCCCGTA  
TTGCTGAATAGAGCGCCTACTCTGCATAGATTAGGCATACAGGCATTTCAACCCATTTTGTGGAAGGACGTGCTATTTG  
TTTACATCCATTAGTTTCGTAAGGGATTCAATGCAGACTTTGATGGGGATCAAATGGCTGTTTCATGTACCTTTATCTTTGG  
AGGCTCAAGCGGAGGCTCGTTTACTTATGTTTTCTCATATGAATCTCTTGTCTCCAGCTATTGGGGATCCCATTTCCGTA  
CCAACCAAGATATGCTTATTGGTCTATATGTATTAACGAGTGGGAATCGCCGAGGTATTTGTACAAATAGGTATAATCC  
ATGG-----AATCGC-----AGAAAC-----TATCAAATGAA---AGAACT---TATGAT-----  
-----AATAAC-----  
TATAAGTATAGAAAAAAGAACCTTTTTTTTTGTAATTCCTATGATGCAATTGGAGCTTATCGACAGAAAAGAATCAA  
TTTAGATAGTCTTTGTGGCTT-----CGATGG---CGACTA-----GATCAACGCATTATTGCTTCA-----  
AGAGAAGTTCCTATCGAGATTCATATGAATCTTTGGGTACCTATCATGAAATTTATGGGCACTATCTAATAGTAAGAAG  
TGTAATAAAGAAATTTATTTGTATATACATTCGAACAACGTGCGTCAATTTCTCTTTTTTCGAGAAATCGAAGAAGCTA

TACAAGGGTTTTGTCGAGCCTGCTCATTGGTACC-----  
-----ATGGAGGTA-----CTTATGGCAGAA---CGAGTCAATCTAGTCTTT--

CACAATAAAGTAATAGATGGAAGTCCATTAAAAGACTTATTAGCAGATTAATAGATCACTTCGGAATGGCATATACATC  
ACACATTCTGGATCAAGTAAAGACTCTGGGTTTTCCAGCAAGCCACTGCTACATCCATTTTCATTAGGGATTGATGATCTTT  
TAACAATACCTTCGAAGGGATGGTTAGTACAAGATGCTGAACAACAAAGTTTGATTTTGGAAAAACACCATCATTATGGG  
AATGTACATGCAGTAGAAAAATTACGCCAATCCATTGAGGTATGGTATGCTACAAGTGAATATTTGCGACAAGAAATGAA  
TCCTAATTTTAGGATGACAGACCCCTTTAATCCAGTCCATATAATGTCTTTTTTCGGGAGCCAGAGGAAATGCATCTCAAG  
TACACCAATTAGTAGGTATGAGAGGATTAATGTCAGATCCTCAAGGACAAATGATTGATTTACCCATTCAAAGCAATTTA  
CGCGAAGGACTATCTTTAACAGAATATATCATTCTTGTACGGAGCCCAGAAAGGAGTTGTGGATACTGCTGTACGAAC  
ATCAGATGCTGGATATCTTACGCGCAGACTTGTGAAGTAGTACAACACATTGTTGTACGCAGAACAGATTGTGGAACCA  
TCCGAGGGGTTTTCTGTGAGTCTCGA-----AATGGG-----

-----ATGATGCCGAAAGAATTTTTATTCAAACA-----  
TTAATTGGTCGTGATTAGCAGACGATATCTATATGGGCCACGATGCATTGCCATTTCGAAATCAAGATATTGGAATTGG  
ACTTGTCAATCGATTCAACC-----

TTTCGAACACAACCAATATCTATTTCGAACCCCTTTACTTGTAGGAGTACATCTTGGATCTGTGATTATGTTATGGTAG  
GAGTCTACT-----

CATGGCGACCTGGTCGAATTGGGAGAAGCTGTAGGTATTATTGCGGGTCAATCTATTGGAGAACCAGGGACTCAACTAAC  
ATTAAGAACTTTTCATACCGGCGGAGTATTCACAGGTGGTACTGCCGAACATGTACGAGCCCCCTCTAATGGAAAAATCA  
AATTCAT-----

GACGATTTGGTTCATCCACACGTACGCGTCATGGGCATCCTGCCTTTCTATGTTCTATAGACTTGTATGTAECTATTGA  
GAGTGAAGATATTCTACATAACGTGACTATTCCACCAAAAAGTTTTCTTTTGGTTCAAAATAATCAATATGTAGAATCAG  
AACAAGTGATTGCTGAAATTCGCGCGGGAACATACTTTCAAT-----

TTGAAAGAGAGGGTTTCGAAAACATATTTATTCTGAATCAGAGGGAGAAATGCCTGGAGCACCGATGTG-----  
TACCAT-----

GCACCTGAATTTACATATAGTAATGTCCATCTTTTACCAAAAACAAGCCATTTATGGATATTATCAGGGGGTTCG-----  
-TGCAGATCCAGT-----AGAGTCCCTTTTTCACTCTACAAGGATCAAGACCAAATGAATCTTTCGTTTCGACA-----

GAAAGA---GAACGAAGATATATTTTCG-----AGTCTC-----TCAGTGAATAATGATCAA-----

-----ATGAGATACGAATTATGTAGTCTGATTTT---TCTGGTAAAATA--  
-AAAGAAGATAGGATT-----CCT-----GATTAT---TCA---GAACTT-----AATCGAATCATATCTATT-  
-----GTTTCATTGTAATCTCAAATATCCTACTACTTTTCGACGAGAATTCTGAT-----

TTATTGGCAAAAAGGCGAAGAAATCGATTTCTTATTCCACTACAA-----TCGATTCAAGAA-----

CGAAAGAAAGAATAATG---CCCCATTCA-----

GGTATCTCGATTGAACTACCGATAAATGGAATTTTACGTAGAAATAGTATTCTTGCTTATTTTCGACGATCCTCGATACAG  
AAGA-----AAGAGTTCGGAATT-----

-----ATTAATATGGGACTCTAGGGGTTTCATTCA-----

GTCGTTAAAAAAGAGGATTTG---ATTGAGTATCGAGGAATCAAAGAATTTAAGCAAAAATGC-----

CAAATGAACTAGATCCATTTTTTTTTCATTCCCAGAAAGTGCATATTTTCCCTGAATCTTCTTCG---

ATAATGGTACGGAACAATAGTCTGATTGGAGTAGATACACGAATCGCTTTAAATACA-----

AGAAGCCGAGTGGGCGGATTAGTCCGAGTGGAGAGAAAAAAGGATT---

GAACTGAAAATCTTTTCTGGAGATATCCATTTTCTGGAGAGACAGATAAG-----

ATATCCCACACAGTGGCATCTTGATA-----CCCCAGGAACAGGAAAAACA---AAT-----

TTTAAGGAATCC-----AAAAAATGG-----AAAAATTGGATCTATGTCCAACGG-----ATCACACCTACTAAG--

Ginkgo ACCAGTTCCTCCTCCCGAACCGAGACCAATCGTTCAATTAAGTGAAGGTGAACTAATTACTTCA--

GATCTAAATGAACTTTATCGAAAAGTTATCCATCGGAATAATACTCTTACCAATTTATCAGCAAGAAGTGGATCTGCGCC

AGGGGGATTAGTTATTTGTCAAAGAAATTGGTCCAAGAAGCTGTAGATGCACTTCTCGATAATGGCATCCGTGGACAAC  
CAATGAAGGACAGTCGTGATAGACCCTATAAATCGTTTTTCAGATGTGATCGAAGGCAAAGAAGGAAGATCTCGTGAGAAT  
TTACTTGGGAAACGAGTCGATTATTCAGGTCGTTCTGTCAATTGTGGTGGGTCCTCCCTCCATTGCATCAATGTGGATT  
ACCCCGAGAAATAGCAATAGAGCTTTTTCAAGCATTGTGAATTCGTGGTCCGATTGGACGACATCTTGCTCCCAACCTAA  
GAGCCGCTAAAAGTATAATTCGAGATAAAGAACCCGTTATATGGAAAGTACTTCAAGAAGTTTTACAAGGGCATCCCGTA  
TCGTTAAATCGAGCACCTACTTCACACAGATTAGGCATACAAGCGTTCACACCTATTTTTAGTAGAAGGACGTGTCATTCCG  
TTTACATCCATCGGTTTGTGGAGGATTTAATGCGGACTCCGACGGAGATCAAATGGCTGTTTCATGTACCTCTATCTCTGG  
AAGCTCAGGCAGAAGCTCGTTTACTTATGTTTTCTCATACAAATCTATTGTATCCAGCTATTGGAGATCCTATTTCTGTGA  
CCAACTCAGGATATGCTTCTTGGACTTTATATATTAACGGTCGAAAATAATCAAGGTATTTATGGGAATAGGTACCACCC  
ATAT-----AACTCC-----AATAAGAAG---ATATTT-----  
-----TACTGCAAG-----  
AAACTTTCTTTTCTAGTTATGATGATGCGCTCAGAGCTTATCGGCAAAAACGAATTCACCTTATACAGCCCTTTATGGCT  
C-----CGGTGG---CGGGTA-----  
GATCTACGTATTACTACCTCAGTAAACCGAGAAGCCCCTATAGAGGTTCAATATGAATCTTTGGGTACCTTCCGTGAAAT  
CCATGAACATTATAGAATAATCAGAAGTATGATGGGAGAAATACTTAGTATATATATCCGGACAACCTGTTGGTCGTATTC  
GTTTCAATCGGGAAATAGAAGAAGCCATACAAGGCTTTTTCTCGGGCT---TCT---  
GAACACCCGAATAAATCACTAAAAGCTATCAGAATA-----ATG-----  
ATGTGGAGGTTTTTA--CCTATGACAGAA---CGGGCTAAATTGCTCTTT-----  
CATAATAAAGTGATGAATAGAATTGCCACGAAACAACCTATTAGCAGATTAATAGATCACTTCGGAATGACATATACATC  
GCATATCTCGGATCAACTTAAGGCTTCAGGTTTCCAACAAGCTACTGATGCAGCTATTTTCGTTAGGAATTGATGATCTAT  
TAACAGCACCATCCAGAGGATGGCTCGTCCGAGATGCGGAACAACAAGGTTCTATTTTCGAAAAACATCATCATTATGGG  
AATGTATATGCAGTGGAAAAATTACGTCAATCGATCGAGACATGGTATGCTACAAGTGAATATTTGAGACAAGAAATGAA  
TCCTAATTTTGGAAATGACTGATCCTTCTAATCCAGTACATATGATGTCCTTCTCGGGAGCTAGAGGAAATACATCTCAGG  
TTCACCAATTAGTAGGTATGAGAGGATTAGTGTGATCCTCAAGGACAAATCATTGATTTACCTATTCAAAGGAATTTTC  
CGCGAAGGACTCTCTTTGACAGAATATATTTTCTGCTATGGCGCTCGTAAAGGGGTTGTGGATACTGCTGTGCGAAC  
ATCAGATGCTGGATACCTCACGCGCAGACTTGTGGAAGTAGTTCAACACATCGTTGTACGTAGAGCAGATTGTGGCACTA  
TTCGAGGTATTTCCGTAAGTCCCATT-----CGAGGTGAGAGAGGATCAAAAAGGAA-----  
-----TTGTTCTGCAAACA-----  
CTAATTGGTCGTGTGTTAGCGGACGATGTCCATATAAATAAGAGATGCATTGCCACGCGCAATCAAGATATCGGGGTTGG  
ACTTGCCGATCAATTAAGAACC-----  
CTTCGAACACAACCAATATATATACGAACCCCTCCTACTTGCAAGAGTCTATCTCGGATTTGTCGATTATGTTATGGTCG  
GAGTCCTACT-----  
CATAGTAACTTGATCGAATTAGGAGAGGCAGTAGGCATTATTGCGGGCCAATCAATTGGAGAACCAGGAACCTCAACTAAC  
ACTAAGAACTTTTCATACCGGAGGGGTATTTACAGGTGATATTGCAGAACATGTACGAGCTCCTTTCAATGGAAAGATTC  
AATTCAAT-----  
GAAAATTTGGTTCATCCTACACGTACACGTACCGGACATCCTGCTTCTATATGCCATAACGAATTATCTATCACTATTGA  
TGGTCAAGATCAGGTACATAGTTAACCATTCCATCACAAAGTTTGTCTTTGGTTCAGAATGATCAATATGTGGAATCGG  
ACAAGTTATTGCCGAAGCTCGTGCTAGAATCTCTCT-----  
TCAAAGGAAAAAGTTATGAAACATATCTATTCCGACTTAGAGGGAGAAATGCCTGGAGTACCAATGTG-----  
TGTCAT-----  
GCACCTGAAAATGTACATGGTAATGTTTCATCTCATACTCAGGACAAGTTATTTATGGGTATTATCGGGAGGTCTG-----  
-TACGAATCCGGT-----GTAGTACCCTTTCCACTTTATAAAGATCAAGATCAAGTGAATATTCAATTTCT-----  
CTTGCC---AAACATAAATCACTTTCT-----GATTCT-----TCGGTGAATCAAGATCGA-----  
-----  
-----GTGAAACACAAATCAGTTGACTCAAACCTC---TCTGGAAAA-----  
-----GAAGAAAAAATA-----TCA-----GTTTAT---TCA---GGAATT-----GATCGGATTATGTCCAAT-  
-----GAGCATTGGGACTCCATATATTCTACCATTCTTTTGTAACTGCAAG-----  
ATTTTAGGCAAAAAGCAAAGAAATAGATTAATCGTCCCATTGCGA-----TACGATAAAGAA-----  
CGAGAAAAGAGAAGAATA---CCTTGTCT-----  
AATTCTATTCTTAGAATACCCAGAAATTTCTTTTTTTCAGAGAAATCACATTTTAGCCGTTTTGGATGACCCTCAATACAG  
AGTT-----GATAGTTCAGGAATT-----  
-----  
-----  
-----  
-----

-----CTAAAATATGGAAACATAAGAATTGATTCA-----  
-----  
ATCGAGAAAAAAGATGATTTT---CTCGAAGATCAAGGATCAAGAGGATCCAGACCGAAATAT-----  
GAAATTGAAGGAGGTCGCTTCCTTTTCATCCCCGAAGAAGTGCATATCCTACACGAATCTTCGTCG---  
ATAATGGTACGAAATGGTAGTATTATTCGAACAGGTACACAAATCACTTTCAATATC-----  
GAAAGCCAAGTAGGCGGATTAGTTCCGGATAGAAAAGAATGAGAAAAAAGATT---  
GAAGTGAGAATATTGCCTGGAGATATCTATTTCCCCGGGGAGATACATGAA-----  
ATATCTCGGCACAACGGCACTTTAATA-----CCACCGGAAAAATCATCTTT---GAT-----  
GAATTCCAATCT-----GTAAATTGGATCTATTTCCAATGG-----ATCACACCTCATAAG--  
-----  
-----

Glycine ACCAGTTCTTCCTCCCGAATTGAGACCGATTATTCAAATCGATGGGGGTAAACTAATGAGCTCT--  
-

GATATTAATGAACTATATAGAAGAGTTATCTATCGGAATAATACTCTTATCGATTTATTAACAACAAGTAGATCTACTCC  
AGGAGAATTAGTAATGTGTGTCAGGAGAAATTGGTACAAGAAGCCGTGGATACACTTCTTGATAATGGAATCCGCGGACAAC  
CGATGAGGGACGGTCATAATAAGGTTTACAAATCATTCTGATATAATTGAGGGCAAAGAGGGGAAGATTTGCGGAGACT  
CTACTTGGGAAACGGGTTGATTATTCGGGTCGTTCTGTCAATTGTTGTAGGTCCATCACTTTTATTACATAGATGTGGATT  
GCCCCGCGAAATAGCAATAGAACTTTTCCAGACATTTCTAATTCGTGGTCTAATTCGAAAACATTTTGTCTCGAACATAG  
GAATTGCTAAGAGTAAAATTCGGGAAAAAGAACCGATTGTATGGGAAATACTTCAAGAAGTTATGCAGGGACATCCCGTA  
TTGCTGAATAGAGCGCCGACTCTGCATAGATTAGGTATACAGGCATTCCAACCCATTTTAGTAGAGGGGCGTGCTATTTG  
TTTGCATCCATTAGTTTGTAAAGGATTCAATGCAGACTTTGATGGGGATCAAATGGCTGTTTATGTGCCTTTATCTTTAG  
AAGCTCAAGCAGAAGCTCGTTTACTTATGTTTTCTCATACGAACCTCCTGTCTCCGGCTATTGGGGATCCTATTTCCGTA  
CCAATCAAGATATGCTTATTGGACTTTACATATTAACGAGCGGGAATCGTCGAGGTATTTATTCAAATAGGTATAATCC  
ACGG-----AATTGCGGAAATTTTAGAAAT-----CTTAAAAATGAA---AGAATT---CGAGAT-----  
-----AATAAC-----

TATAAGTATACGAAAAAAAAGAACCCTTTTTTTGTAATTCCTATGATGCAATTGGAGCTTATCAACAAAAAGAATAAA  
CTTCGATAGTCCTTTGTGGCTC-----CGGTGG---CGACTA-----GATCAACGCATTATTTCTGCA-----  
AGAGAAGTTCCCTATCGAAGTTCACTATGAATCTTTAGGTACCTATCATGAAATTTATGAGCATTATCTAGTAGTAAGAAG  
TACAAAAAAGAAATTCGTTCTATATACATTGAAACCAATGTTGGTCATATTTCTTTTTATCGAGAAATCGAAGAAGCTA  
TACAAGGTTTTTGCCTGCTATTCATATGATATC-----  
-----ATGGCAGAA---CGGGCCAATCTAGTCTTT--  
-----

CACAATAAAGTGATAGGTGGAAGTCCATTAAACGACTTATTAGCAGATTAATAGATCACTTTGGAATGGCATATACATC  
ACATATCCTGGATCAAGTAAAGACTCTGGGATTCGGTCAAGCTACGGATACATCCATTTTATTAGGAATTGATGACCTTT  
TAACAATACCTTCTAAAGGATGGCTAGTCCAAGATGCTGAACAACAAAGTTTGATTTTGGAAACAACATCATCATTATGGG  
AATGTACATGCAGTAGAAAAATTACGCCAATCCATTGAGATATGGTATGCTACAAGTGAATATTTTCGACAAGAAATGAA  
TCCTAATTTTAGGATGACCGACCCCTTTAATCCAGTCCATATAATGTCCTTTTTCGGGAGCTAGAGGAAATGCGTCTCAAG  
TACACCAATTAGTGGGTATGAGAGGATTAATGTCGGATCCACAAGGACAAATGATTGATTTACCTATTCAAAGCAATTTG  
CGCGAAGGGCTTTCTTTAACAGAATATATAATTTCTTGCTACGGAGCTCGTAAAGGGGTTGTAGATACTGCTGTACGAAC  
ATCAGATGCTGGATATCTTACACGCAGACTTGTGGAAGTGGTTCAACACATTGTTGTACGTCGAACGGATTGTGGTACCA  
TTCAAGGAATTTCCGTGAATACCCAG-----AATGGA-----  
-----ATGATGCCGGAAAGAATATGGATACAAACA-----

TTAATTGGTCGTGTATTAGCAGACGATATATACAGAGGTTTACGATGCATTGCCGTTAGAAATCAAGATATTGGAATTGG  
ACTTATCAATCGATTTAAAACC-----  
CTTCAAACCAACCAATATCTATCCGAACCTCCCTTTACCTGTAGGAATACATCTTGGATCTGTGATTGTGTTATGGCCA  
AAGTCCTACT-----  
CATGGTCACTTGGTGAATTAGGAGAAGCTGTAGGTATTATTGCGGGCCAATCCATTGGAGAACCAGGCACTCAACTAAC  
ATTAAGAATCTTTTACTACTGGCGGAGTCTTCACTGGAGGTAAGTGCAGAACAGGTGCGAGCACCTTATAATGGAAAAATTC  
AATTCAAT-----

GAAGATTTGGTTCATCCTACACGTACACGTCATGGGCATCCTGCTTTTCTATGTTATATAGATTTGTATGTTACTATTGA  
AAGTGGTGATATTATACATAATGTGACTATTCCACCAAAAAGTTTTCTATTAGTTCAAACAATCAATATGTAAAATCAG  
AACAAGTAATTGCCGAGATTGCGGCAGGAACATACACTTTTAAAT-----  
TTAAAAGAAAAAGTTCGAAAACATGTCTATTCTGACTTAGAAGGAGAAATGCATTGGAGTACCGATGTG-----  
TACCAT-----

GCATCAGAATTTAGATATAGTAATGTCCATATCTTACCAAAAACAAGTCATTTATGGATTTTATCAGGAAAATCA-----  
-TACAGGTCCGGT-----TCAGTCTCTTTTTCAATCCGAAAAGATCAAGATCAAATGAACATTCAATATCTT-----



TCTACT---GGAGAAAGAGATTTTTGT-----AACCTT-----TTAGCAAGTAAAAAAAA-----  
-----  
-----GTAAGACATAAATTGTTTTCGTTTTCAATCCT---TCTGATAAA-----  
-AAAGAAAGAAGGATT-----TCA-----GATTAT---TCA---ATATTT-----AATCAAATCATATCTATA-  
-----GATCATTGTCATTTTACACATCCTACTATTTTCCATGATACTACGGAT-----  
TTATTAGCAAAGAGGCGGAGAAATAGATTAATTATTTCCATTTCAATTCCAATCGATTCAAGAA-----  
CGAGACAAAGAGCTAATG---TTAGCTTCC-----  
AGTATCTCGATTGAAATACCAATCAATGGTATTTTTTCGTAGAAATAGCATTCTTGCTTATTTTCGATGATCCTCAATACCG  
AACA-----CAGAGCTCGGAATT-----  
-----  
-----ACTAAATATAGGACTATAGGTATAAATTCC-----  
-----

ATTTTTAAAAAAGAGGATTTTT---TTAATGTATCAAGGAGTTAAAGAATTTAAGACAAAATAC-----  
CAAATTAAGTAGATCAATTTTTTTTTCATTCCCAGGAGTGCATATTTTACCAGAATCTTCTTCC---  
ATAATGGTACGGAACAATAGTATCGTTGAAGTAGATACACTAATCACTTTAAATATA-----  
AGAAGTCGAGTAAGGGGATTGGTCCGATTGGAGAAGAAAAAAAAAAGATT---  
GAATTAATAATATTTTCCGGGGATATCTATTTTCCCGAGAAATGGATAAG-----  
ATATCCCACACAGTGCCGTGTGATA-----CCACCAAGAACGGTAAAAAAAA---AAT-----  
TCAAAAGAA-----AAAAAATG-----AAAAATTGGATCTATGTCCAATGG-----ATCACAATTACGAAA--  
-----

-----  
Gossypium ACCGGTTCCTCCCGAGTTGAGACCGATCATT CAGATAGATGGGGGTAAACTAATGAGTTCG--  
-

GATATTAATGAACCTATAGAAGAGTTATCTATCGAAATAATACTCTTACCGATCTATTAACAACAAGTAGATCTACGCC  
AGGGGAATTAGTAATGTGTGAGGAAAAATTGGTACAAGAAGCCGTGGATACACTTCTTGATAATGGAATCCGCGGACAAC  
CAATGAGGGACGGTCATAATAAGGTTTACAAGTCGTTTTTCAGATGTAATTGAAGGCCAAAGAGGGGAAGATTTTCGCGAGACT  
TTGCTTGCCAAACGAGTCGATTATTCGGGACGTTCTGTTCATTGTTGTTGGCCCTCACTTTTATTACATCGCTGTGGATT  
GCCTCGCGAAATAGCAATAGAGCTTTTCCAGACATTTGTAATTCGCGGTCTAATTAGACAACATCTTGCTCCGAACATAG  
GAGTTGCTAAGAGTAAAATTCGGGAAAAAGGGCCGATTGTATGGGAAATACTGCAAGAAGTTATGCGGGGACATCCTGTA  
TTGCTGAATAGAGCGCCTACTCTGCATAGATTAGGTATACAGGCATTCCAACCTATTTTATGGAAGGACGCGCTATTTG  
TTTACATCCATTAGTTTGTAAAGGATTCAATGCAGACTTTGATGGGGATCAAATGGCAGTTTCATGTACCTTTTATCTTTAG  
AGGCGCAAGCGGAGGCTCGTTTACTTATGTTTTCTCATATGAATCTTCTGCTCCAGCTATTTGGGGATCCCATTTCCGTA  
CCTACTCAAGATATGCTTATTGGGCTCTATGATTAACGAGTGGGAATCGTCGAGGTATTTGTGCGAATAGGTATAATCC  
ATGG-----AATCGA-----AAAAGC-----TATCAAATGAA---AGAATT---GACGAT-----  
-----AATAAC-----TATAAGTCTACAAG-----

GAGCCTTTTTTTTGTAATTCCTATGATGCGATTGGAGCTTATAGGCAGAAAAGAATCAATTTAGATAGTCTTTGTGGCT  
C-----CGGTGG---CAACTA-----GAGCAATGCGTTATTGCTTCA-----  
AGAGAAGCTCCCATCGAAGTTCACCTATGAATCTTCGGGTACCTATCATGAGATTTATGGACATTATCTAATAGTAAGAAG  
TTTTAAAAAAAAAATCTTTGTATATACATTTCGAACCACTGTTGGTCAATTTCTCTTTACCGAGAAATCGAAGAAGCTA  
TACAAGGGTTTTTTTCGGGCCTACTCATATGATACCCAATCATATGGTATC-----  
-----ATGGCAGAA---CGGGCCAATCTGGTATTT--  
-----

CACAATAAAGTGATAGATGGAACGCCATTAAACGGCTTATTAGCAGATTAATAGATCACTTCGGAATGGCATATACATC  
ACACATCCTGGATCAAGTAAAAGCTCTGGGTTTCCAGCAAGCCACTGCTACATCCATTTTATTAGGAATTGATGATCTTT  
TAACGATACCTTCTAAGGGATGGCTAGTCCAAGATGCTGAACAACAAAGTTTATTGTTTTGAAAAACACCATCATTTTGGG  
AATGTACACGCGGTAGAAAAATTACGCCAATCAATTGAGATATGGTATGCTACAAGTGAATATTTGCGACAAGAAATGAA  
TCCTAATTTTGGATGACTGACCCGTTTAAACCCAGTCCATATAATGTCTTTTTTCAGGAGCTAGAGGAAATGCATCTCAAG  
TGCACCAATTAGTAGGTATGAGAGGATTAATGTCGGATCCCCAAGGACAAATGATCGATTTACCCATTCAAAGCAATTTA  
CGCGAAGGACTGTCTTTAACAGAATATATCATTTCTTGCTACGGAGCCCCGAAAAGGGTTTGTGGATACCGCCGTACGAAC  
ATCAGATGCTGGATATCTTACGCGCAGACTTGTGTAAGTAGTTCAACACATTGTTGTACGTAGAACAGATTGTGGCACCA  
CCCAGGGATTTCTGTGAGTCTCAA-----AAGAGG-----  
-----

-----ACGCTTCCGGAAAGAATTTTTATCCAAACA-----  
 TTAATTGGTCGTGTATTAGCGGACGATATATATATGGGTCCGCGGTGCATTGCCATTGCAAATCAAGATATTGGGCTTGG  
 GCTTGTTCGATCGATTCAGAGCC-----  
 TTTGAAACACAACCAATATCTATTGCAACTCCCTTTACTTGTAGGAGTACATCTTGGATTTGTTCGATTATGTTATGGTTCG  
 GAGCCCCACT-----  
 CATGGTGACCTGGTTGAATTGGGAGAAGCTGTAGGTATTATTGCGGGGCAATCCATTGGAGAACCAGGGAACGCAACTAAC  
 ATTAAGAAGTTTCATACCGGCGGAGTATTACAGGGGGTACTGCAGAACATGTCCGAGCCCCCTTTTAAATGGAAAATAA  
 AATTCAAT-----  
 GAGGATTTGGTTCATCCTACACGCACACGTCACGGGCATCCTGCTTTTTTTATGTTATCGGGACTTGTATGTAATTATTGA  
 GAGTGAAGATATTATACATAAAGGTGGCTATTCACCAAAAAGTTTTCTTTTAGTTCAAACGATCAATATGTAGAATCAG  
 AACAAAGTGATGCTGAGATTTCGCGCGGGAAACATACTTTAAAT-----  
 TTGAAAGAGAGGGTTTCGAAAACATATTTATTTCTGACTCAGAGGGGGAAATGCACTGGAGTACCGATGTG-----  
 TACCAT-----  
 TCGCCCGAATTTACATATAGTAATGTCCATCTCTTACCAAAAACAAGCCATTTGTGGATATTATCAGGGGGTTTCG-----  
 -TACAAATTCAGT-----GTAGTTCCTTTTTCGCTCCACAAGGATCAAGATCAAATAAGCATTTCATTATCTT-----  
 TCTGCC---GAACGAAGATATATTTCT-----AGATT-----TCAGTGAATAATGATCAA-----  
 -----  
 -----GTGAGACACAACCTATTTAGTTCCGATTTT---TCGGATAAA-----  
 -AAAGAAGAGAGGATT-----TAC-----GATTAT---TCA---GAATTG-----AATCGAATAATAGGTACT--  
 -----GGGCATTGTGATTTTCATATATTCTGCTATTCTCCACGAGAATGCTGAT-----  
 TTATTGGCAAAGAGACGAAGAAATAGATTTATTATCCATTTCAA-----TTGATTCAAGAC-----  
 CAAGAGAAAGAACTAATG---  
 CTACATTCACATTCCGGTATCTCGATGGAAATACCCATAAATGGTATTTCCGTAGAAAAAGTATTCTTGCTTTTTTTTGA  
 CGATCCTCGATACAGAAGA-----AAGAGTTCAGGAATT-----

-----  
 ACTAAATATGGGACTCTAGGGGCGCATTCA-----  
 -----ATCGTCAAAAGGGAGGATGTG---  
 ATTGAGTATCGAGGAGTCAAAAAGGTTAAGCCAAAATAC-----  
 CAAATGAAAGTAGATCGATTTTTTTTTTTCATTCCCAGGAAAGTGCATATTTTATCCGAATCTTCTTCC---  
 ATAATGGTACGGAACAATAGTATCATTGGAGTAGATACCCCAATCACTTTAAATACA-----  
 AGAAGCCAAGTGGGCGGATTGGTCCGAGTGGAAAGAAAAAAAAAAAAAGGATT---  
 GAAGTCAAAATTTTTTCGGGTAATATCTATTTTTCCCGGAGAAAGAGATAAG-----  
 ATATCTCGACACAGTGGCATTGATA-----CCACCAGGAACGGGCAAAACA---AAC-----  
 TCTAAGGAATCA-----AAAAAATTG-----AAAAATTGGATCTATGTCCAACGG-----ATCACACCTACCAAG--

-----  
 Helianthus ACCAGTTCTTCTCCTGAGTTGAGACCAATCTATCATATAGATGAGGATAAACTAGTGACCTCG--  
 -  
 GATATTAATGAAATCTATAGAAGAATTATCTATCGGAATAATACTCTTACAGATCTATTAACAACAAGTATAGCTACACC  
 AGAAGAATTAATAATATCTCAGGAAAAATTGCTACAAGAAGCCGTGGATGCACTTCTTGATAATGGAATCTGCGGACAAC  
 CAATGAGGGATGATCATAATAGAATTTACAAGTCGCTTTTCAGATGTAATTGAAGGCAAAGAAGGAAGAGTTCGCGAGACT  
 CTGCTTGGTAAACGAGTCGATTAATTCAGGGCGGTGAGTATGTCGTGGGCCCTTCACTTTTCATTACATCGATGTGGATT  
 GCCTCGCGAAATGCAATAGAATTTTTCCAGGCATTTGTAATTCGTGACCTAATTAGAAAACATCTTGCTTCGAACATAG  
 GAGTTGCTAAGAGTCAAATTCGGAACAAAAACCTATTGTATGGGAAATACTTCAAGAAATTCTGGATGACCATCCTGTA  
 TTGCTGAATAGAGCGCCTACTCTGCATAGATTAGGTATACAGGCATTCTTCCCCGTTTTAGTGGAAGGGCGTGCTATTTG  
 TTTACATCCATTAGTTTGTAAAGGGCTTCAATGCAGACTTTGACGGGGATCAAATGGCTGTTTCATGTGCTTTTATCTTTAG  
 AGGCGCAAGCAGAGGCACGTTTACTTATGTTTTCTCATATGAATCTTTTGTCTCCAATTGGAGATCCCATTCTGCA  
 CCAACTCAAGATATGCTTAGTGGACTCTATGCTTAAACGAGTGGAAATCGTCGGGGTATTTGTGTAATAGGTATAATCC  
 ATGT-----AATCGT-----AGAAAC-----TATCAAAATGAA---GATAAT-----  
 -----AAC-----

TATAAGTATACAAAAAAAAAAGAACCCTTTTTTTGTAATGCCTATGATGCAATTGGAGCTTATCGGCCAAAAACGAATCAA  
TTTAGGTAGTCCTTTGTGGCTG-----CGGTGG---CGACTA-----GATCAACGTGTTATTGCTGCA-----  
AGAGAAGCTCCTATCGAAATTCACTATGAATCTTTGGGGACCTATTATGAGATTTATGGACTATCTAATAGTAAGAAG  
TATAAAAAAAGAAATTCTTTATATATATATTCGAACCACTCTTGGTCATATTTCTCTTTATCGAGAAATAGAAGAAGCCA  
TACAGGGGTTTTGGCAGGGCTGTTATAATTCTATGCTACCAGCGCGAATTCGAGTCTCACCGGGTTAA-----  
-----ATGGAGGTA-----CTGATGGCAGAA---CGGCCCACTCAGGTCTTT--  
-----

CACAATAAAGTGATAGACGGAACTGCCATGAAACGACTTATTAGTCGATTTATTGATCACTATGGAATAGGATATACATC  
ACATATCCTGGATCAAGTAAAGACTCTGGGTTTTCCGACAAGCGACCGCCGCATCCATTTTCATTAGGAATTGATGATCTTT  
TAACAATACCTTCTAAAAGATGGCTCGTTCAAGACGCTGAACAACAAAGTGTTCTTTTGGAAAAACACCATCATTATGGG  
AATGTACACGCGGTAGAAAAAATTACGTCAATCAATCGAGATATGGTATGCCACAAGTGAATATTTGCGACAAGAAATGAC  
TCCTAATTTTTCGGATGACCGATCCTTTTTAATCCAGTCCATATAATGTCTTTTTTCGGGAGCCAGAGGAAATGCGTCTCAGG  
TACATCAATTAGTAGGTATGAGAGGATTAATGTCGGATCCCCAAGGACAAATGATTGATTTACCCATTCAAAGCAATTTA  
CGCGAAGGACTCTCTTTAACAGAATATATATTTCTTGCTACGGAGCCCGTAAAGGAGTTGTGGATACCGCTATCCGAAC  
ATCAGATGCAGGATATCTCACGCGCAGACTTGTGTAAGTAGTGCAACACATTGTTGTACGTCGAACAGATTGTGGCACCG  
TTCGCGGTATTTCTGTAAGTCCTCGA-----AATGGA-----  
-----ATGATGGCGGACAGGATTTTTATCCAAACA-----

TTAATTGGCCGTGTATTAGCAGATGATATATATATAGGTTTCGCGATGCATTGCTACTAGAAATCAAGATATTGGGGTTGG  
ACTTGTCAATAGATTCCATACT-----

TTTAGAGCACAACCAATCTCTATTTCGAACCCCTTTACTTGTAGGAGTACATCTTGGATTTGTCAATTATGTTATGGCCG  
GAGTCCAGCT-----

CATGACGACCTGGTTCGAATTGGGAGAAGCTGTAGGTATTATTGCAGGTCAATCTATTGGAGAACCAGGTTACTCAATTAAC  
ATTAAGAATTTTTCATACTGGCGGAGTATTCACAGGGGGTACTGCAGAACATGTGCGAGCCCTTTTTAATGGAAAAATAA  
AATTCAT-----

GAGGATTTGGTTCATCCGACACGTACACGTCATGGACATCCTGCTTTTCTATGTTCTAGAGACTTATATGTAACTATTGA  
GAGTGAAGATATTATACACAATGTGTGATTCCGCCCAAAAGTTTTCTTTTAGTTCAAACGATCAATATGTAGAATCAG  
AACAAAGTCATTGCTGAGATTCGCGCGAGAACATCCACTTTGAAT-----

TTGAAAGAGAAGGTTTCGAAAACATATTTATTCTGACTCAGAGGGCGAAATGCACTGGAATACCGATGTG-----  
TACCAT-----

GCACCTGAATTTACATATGGTAATATTCTCTTACCAAAAAACAAGTCATTTATGGATATTATTAGGGGAGCCC-----  
-TGGAGATCTAGT-----CTAGGCCCTGTTTCGATCCACAAGGATCAAGATCAAATGAACGCTTATTCTCTT-----  
TCTGTT---AAGCGAAGATATATTTCT-----AACCCC-----TCAGTAACTAATAATCAA-----  
-----

-----GTGAGACACAAATTTTTTAGTTCGTATTTT---  
TCTGGTAAAAATAAAAAAGGAGATAGGATT-----CCT-----GATTAT---TCA---GAACTT-----  
AATCGAATGACATGACT-----GGTCGTTGTAATCTCAGATATCCGGGCATTCTCGACGGGAATTCTGAT-----  
TTATTGGCAAAGAGGCGAAGAAATAGAGTCATCATCCCACTCGAC-----TCGATTCAAGAA-----  
GGCGAGAACCAACTAATA---CCTTCTTCA-----  
GGTATCTCAATTGAAATCCCCAGAAATGGTATTCTCCGTAGAAATAGTATTCTTGCTTATTTTCGACGATCCTCGATATAT  
AAGA-----AAGAGCTCGGGACTT-----  
-----  
-----  
-----  
-----  
-----

-----ACTAAATATGAGACTAGAGAGCTGAATTCA-----

ATCGTCAACGAAGAGAATTTG---GTTGAGTATCGAGGAGTCAAGGTATTTTGGCCAAAAATAT-----  
CAAAAGGAAGTCAATCCATTTTTTTTTTATTCCTGGGAAGTCCACATTTTGGCCGAATCTTCTTCC---  
ATAATGGTACGGCACAATAGTATTATTGGGGTAGATACACAAATCACTTTAAATAGA-----  
AGAAGTCCGGTAGGTGGATTGGTCCGAGTGAAGAAAAAAGCAGAAAAAATT---  
AAACTGATAATCTTTTCTGGAGATATCCATTTTCTGGAAAGACAAATAAG-----GCATTCCGA-----  
TTGATA-----CCACCGGGAGGGGGAAAAACAA---AAT-----TCCAAAGAATAC-----AAAAAATTG---  
----AAAAATTGGCTCTATATCCAACGA-----ATGAAACTTTCAGGTATGAA-----  
-----  
-----

Illicium ACCAGTTCCTCCTCCCGAGTTGAGACCAATTATTTCAGATAGATGGGGGTAAACCGATGAGTTCG--

GATATTAATGAACTCTATCGAAGAGTTATCTATCGCAACAATACCCTTACCGATCCATTAACAACAAGTAGATCTACACC  
GGGGGAATTAGTACTGTGTGTCAGGAAAAGTTGGTACAAGAAGCCGTGGATACACTTCTTGATAATGGGATCCGCGGACAAC  
CAATGAGGGACGGTCATAATAAAGTTTACAAGTCTTTTTCAGATGTAATTGAAGGCCAAAGAGGGGAAGATTCCGCGAGACT  
TTACTTGAAAACGGGTTCGATTATTCGGGGTCGTTTCTGTTATTGTGGTGGGTCCTTCCCTTTTATTACATCGATGTGGATT  
ACCCCGAGAAATAGCAATAGAGCTTTTTCAGACATTTGTTATTTCGTGGTCTAATCAGACAACGTGTTGCTTCCAACATAG  
GGATTGCTAAAAGTAAAATTCCGGGAAAAAGAACCCATTGTATGGGAAATACTTCAAGAAGTTATGCGGGGGCATCCTGTA  
TTGCTGAATAGAGCACCTACTCTACATAGATTAGGCATACAGGCGTTCCAACCTATTATAGGGGAGGGACGTGCTATTTG  
TTTACATCCATTAGTTCGTAAGGGATTCAATGCAGACTTTGATGGGGATCAAATGGCTGTTTCATGTACCTTTATCTTTGG  
AAGCTCAAACGGGAGGCTCGTTTACTTATGTTTTCTCATATGAATCTCTTGTCTCCAGCTATTGGGGATCCCATTTCCGTA  
CCAACCTCAAGATATGCTTATTGGACTCTATGTATTAACGATCGGGAATCATCGAGGTATTTGTGCAAATAGGTATAATCC  
ATGT-----AATTAC-----AGAAAC-----TATCAAATGAA---ACAGTT---GACGAT-----  
-----AATAAC-----

TACCAGTATACGAAAGAGAAAGAACCCCATTTTTGTAGTTCCTACGATGCACTTGGAGCTTATCGGCAGAAACGAATCAA  
TTTATATAGCCCTTTGTGGCTC-----CGGTGG---AGACTA-----GATCAACGTGTCATTGCCTCA-----  
AGAGAAGTTCCTATCGAAGTTCATATGAATCTTTGGGTACCTATCATGAGATTTATGGGCACTATCAAATAGTAAGAAG  
TATAAAAAGGAAATCCTTTGTATATACATTTCGAACCACTATTGGTTCATATTTCTTTTTATCGAGAAATAGAAGAAGCCG  
TACAGGGATTCTGTGCGGCCTATTTCATACGGTACC-----  
-----ATGGAGGTA-----CTTATGGCAGAA---CGGGCCAATCTGGTCTTT--  
-----

CACAACAAAGTGATAGACGGAACTGCCATGAAACGACTTATTAGCAGATTAATAGATCACTTCGGAATGGCATATACATC  
ACACATCCTGGATCAAGTAAAGACTCTGGGTTTTCCAGCAAGCCACTGCTACATCCATTTTCATTAGGAATTGATGATCTTT  
TAACAATATCTTCTAAGGGATGGCTAGTCCAAGATGCTGAACAACAAGTTTGCTTTTTGGAAAAGCACCATCGTTATGGG  
AATGTACACGCGGTAGAAAAATTACGTCAATCAATTGAGATATGGTATGCTACAAGTGAATATTTGAGACAAGAAATGAA  
TCCTAATTTTAGGATGACGGATCCTTCTAATCCAGTCCATATAATGTCTTTTTTCGGGAGCTAGAGGAAATGTATCTCAGG  
TCCACCAATTAGTAGGTATGAGAGGATTAATGTCGGATCCCCAAGGACAAATGATCGATTTACCCATTCAAAGCAATTTG  
CGCGAAGGACTTTCTTTAACGGAATATACCATTTCCTGCTATGGAGCCCAGCAAGGAGTTGTGGATACTGCCGTACGAAC  
ATCAGATGCTGGATACCTCACGCGTAGACTTGTGGAAGTAGTTCAACATGTTGTTGTACGTAGAACAGATTGTGGCCTA  
TCCGAGGTATTTCCATAAGTATTCGA-----AATGGG-----  
-----ATGACAGGAAGAATTTTGATCCAAACA-----

CTAATTGGTTCGCGTATTAGCAGATGATGTATATATGGGTCTACGATGCATTGCCGCTCGAAATCAAGATATTGGGATTGG  
ACTTGTCAATCGATTTCATAACC-----  
TCTCGAGCACAACCAATATATATTTCGAACACCCTTCACTTGCAGGAGTACATCTTGGATCTGTGATTATGTTATGGTTCG  
GAGTCCCACT-----  
CATGGTGACCTGGTTCGAGTTGGGAGAAGCAGTAGGTATTATTGCAGGTCAATCAATTGGGGAACCAGGGACTCAACTAAC  
ATTAAGAATTTTTCATACCGCGGAGTATTACAGGCGGTACTGCAGAACATGTACGAGCTCCTTTTAAATGGAAAAATCA  
AATTCAT-----

GAGGATTTGGTTCATCCCACACGTACACGCCATGGGCATCCTGCTTTTCTATGTTATATAGACCTATATGTAACCTATTGA  
GAGTCAGGATATTCTACATAATGTGAATATTCCACCAAAAAGTTTTATTTTGGTTCAAATGATCAATATGTAGAATCAG  
AACAAGTGATTGCTGAGATTCCGGGCTAGGACATCCACTTTCTCT-----  
TTTAAAGAGAAGGTTTCGAAAACATATTTATTCTGACTCAGAGGGAGAAATCCACTGGAGTACCGATGTG-----  
TACCAT-----

GTACCTGAATATACACATGGTAATGTTTCATCTCTTACCAAAAACAACCTCATTTTATGGATACTATCAGGAGGTCCGGGCC  
GTGCAGACGCAGT-----ATAGTGCCTTTTTCACTCCACAAGGATCAAGATCAAATGAATCTTCAATCTCTT-----  
TCTGTC---GAACAGAGATATATTTCT-----AACCTC-----TCAGTGAATAATGATCGA-----  
-----

-----GTGAGACACAAATTGTTTGGATTCCT---TTTTGGAAA-----  
-AAAAGGGGGGGGTT-----GGTTAT---TCA---GGACCT-----GATCGAATCCTATCCAAC-  
-----GGGCATTGGGATTTTCATATATCCTGCCATTCTTACGAAAATTCGAAT-----  
TTATTGGCGAAGAGGCGAAGAAATAGATTTCATCATCTCATTCCAA-----CATGATCAAGAA-----  
CGAGAGAAAAAACCACG---CCTCGTCT-----  
GGTATCAAGATTGAAATACCCATAAATGGTATTTTTACGTAGAAATAGTATTCTTGCTTACTTTGACGATCCCCGATACAG  
AAGA-----AGCAGTTCAGGAATT-----  
-----



TATCAT-----  
GCACCTGAATTTACCTATGGTAATGTTTCATCTATTACCAAAAACAAGTCATTTATGGATATTATTAGGGGGGCCG-----  
-TGCAGATCCAGT-----CGAGTCTCACTTTTCGTTCCACAAGGATCAAGATCAAATGAACGCGCATTCCCCT-----  
TCTATC---AAGCGAAGATATACTTCG-----AACCTC-----TCAGAAACGAATGATCCG-----

-----GAGAGACAAAACTCTTTAGTTCGTATTTT---  
TATGGTAAAAAAAAAAAAAAAAAATAGGATT-----TCG-----GATTAT---TCA---AACCTT-----  
AATCAAATTCTATGTACT-----GGCCATTGTAATTTTCATATCTCCAACCACTCTCCACCAAAATTCTGAT-----  
TTATTCTCAAAAAGGCGGAAAAATAAATTCCTGATTCCACTCCAA-----TCGATTCAAGAA-----  
CCTGAAAACAACTAATG---CCCCGTTCA-----  
AGTATCTCGATTGAAATCCCCAAAATGGCACTTTCCGTGGAAATAGTATTCTTGCTTATTTTGATGATCCTCGATACAG  
AAGA-----AAGGGTTCGGGCATT-----

-----CCCCAATATGGGACTATAGAAATGCATTCA-----

ATCGTCAAAAAGAGGATTTG---GTTGAGTATCGAGGAGTCAAGGCATTTAGGCCAAAATAC-----  
CAAATGAAAGTAGATCGCCTTTTTTTTTATTCCCAGGAAGTGCATATCTTACCTAGATCTTCTTCC---  
ATAATGGTACGGAATAATAGTCTCATTGGGGTAGATACACAACCTGACTTTAAATATA-----  
AGAAGCCGAGTAGGCGGGTTTTGTCCGAGTGGAGAGAAAAAAAAAAGAATT---  
GAACTGAAAATCTTTTCTGGAGATATCCATTTTCTGGAGAGACCAATAAG-----  
ATATCTCGACATAGCGACGTTTTGATA-----CCACCAGGC-----AAACCA---AAT-----  
TCCAAGGAATCC-----AAAAAATGG-----AAAAATGGGATCTATGTTCAACGG-----ATCACACCTAGGAAG--

Lactuca ACCAGTTCCTCCTCCTGAGTTGAGACCAATCTATCATATAGATGAGGATAAACTAGTGACCTCG--

GATATTAATGAAATCTATAGAAGAATTATCTATCGGAATAATACTCTTACAGATCTATTAACAACAAGTATAGCTACGCC  
AGAAGAATTAATAATATCTCAGGAAAAATTGCTACAAGAAGCCGTGGATGCACTTCTTGATAATGGAATCTGCGGACAAC  
CAATGAGGGATGATCATAATAGAGTTTACAAGTCGCTTTTCAGATGTAATTGAAGGCAAAGAAGGAAGAGTTCGCGAGACT  
CTGCTTGGTAAACGAGTCGATTATTCAGGGCGGTCCGTGATTGTCTGGGCCCTTCACTTTTATTACATCGATGTGGATT  
GCCTCGCGAAATAGCAATAGAACTTTTCCAGGCATTTGTAATTCGTGACCTAATTAGAAAACATCTTGCTTCGAACATAG  
GAGTTGCTAAGAGTCAAATTCGGAIAAAAAAACCGATTGTATGGGAAATACTTCAGGAAATTCTGGATGACCATCCTGTA  
TTGCTGAATAGAGCGCTACTCTGCATAGATTAGGCATACAGGCATTCTCCCCGTTTTAGTGGAAGGGCGCGCTATTTG  
TTTACATCCATTAGTTTGTAAAGGGCTTCAATGCAGACTTTGACGGGGATCAAATGGCTGTTTATGTCCTTTTATCTTTGG  
AGGCTCAAGCAGAGGGCGGTTTTACTTATGTTTTCTCATATGAATCTTTTGTCTCCAATATTGGGGATCCGATTTCCGGCA  
CCAATCAAGATATGCTTAGTGGACTCTATGTCTTAACGAGTGGAAATCGTCCGGGGTATTTGTGTAATAGGTATAATCC  
ATGT-----AATCGT-----AGAAAC-----TATCAAAATGAA---GATAAT-----  
-----AAC-----

TATAAGTATACAAAAAAAAAAGAACCCTTTTTTTGTAATCCCTATGATGCAATTGGAGCTTATCGGCAAAAACGAATCAA  
TTTAGGTAGTCCCTTTGTGGCTG-----CGGTGG---CGACTA-----GATCAACGCGTTATTGCTGCA-----  
AGAGAAGTTCCCATCGAAATTCATATGAATCTGTGGGGACCTATTATGAGATTTATGGACACTATCTAATAGTACGAAG  
TATAAAAAAAGAAATCTTTATATATATATTCGAACCACTCTTGGTCATATTTCCCTTTATCGAGAAATAGAAGAAGCCA  
TACAGGGGTTTTGGCAGGGCTGTTGTAATTCATGCTACCAACGGGAATTCGAGTCTCTCCGGGTTAA-----  
-----ATGGAGGTA-----CTGATGGCAGAA---CGGCCACTCAGGTCTTT--

CACAATAAAGTGATAGACGGAACCTGCCATGAAACGGCTTATTAGTCGATTTATTGATCACTATGGAATAGGATATACATC  
ACATATCCTGGATCAAGTAAAGACTCTGGGTTTCCGACAAGCTACCGCCGCATCCATTTTATTAGGAATTGATGATCTTT  
TAACAATACCTTCTAAAAGATGGCTAGTTCAAGACGCTGAACAACAAAGTTTTATTTTGGAAAAACACCATCATTATGGG  
AATGTACACGCGGTAGAAAAATTACGTCAATCGATCGAAATATGGTATGCCACAAGTGAATATTTGCGACAAGAAATGAA  
TCCTAATTTTTCGGATGACCGATCCTTTTAAATCCAGTCCATATAATGCTTTTTTTCGGGAGCCAGAGGAAATGCATCTCAGG  
TACATCAATTAGTAGGTATGAGAGGATTAATGTCGGATCCTCAAGGGCAAATGATTGATTTACCCATTCAAAGCAATTTA

CGCGAAGGACTGTCTTTAACAGAATACATTATTTCTTGTACGGAGCCCGTAAAGGGGTTGTGGATACCGCTATCCGAAC  
ATCAGATGCAGGATATCTCACGCGCAGACTTGTGAAGTAGTTCAACACATTGTTGTACGTCGAACAGATTGTGGCACCG  
TTCGAGGTATTTCTGTAAGTCCTCGA-----AATGGA-----  
-----ATGATGACGGACAGGATTTTTATCCAAACA-----  
TTAATTGGCCGTGTATTAGCAGATGATATATATATAGGTTTCGCGATGTATTGCTACTAGAAATCAAGATATTGGGGTTGG  
ACTTGTACAGTAGATTCCATAACT-----  
TTTAGAGCACAACCAATCTCTATTTCGAACCCCTTTACTTGTAGGAGTACATCTTGGATTTGTCAATTATGTTATGGCCG  
GAGTCCAGCG-----  
CATGACGACCTGGTCGAATTGGGAGAAGCCGTAGGTATTATTGCAGGTCAATCTATTGGAGAACCGGGCACTCAATTAAC  
ATTAAGAACTTTTCATACCGGCGGAGTATTTACAGGGGGTACTGCAGAACATGTGCGAGCCCTTCTAATGGAAAAATAA  
AATTCAAC-----  
GAGGATTTGGTTCATCCGACACGTACACGTCATGGACATCTGCTTTTTCTATGTTCTAGAGACTTGTATGTAACTATTGA  
GAGTGAAGATATTATACACAATGTGTGTATTCCGCCAAAAGTTTTCTTTTAGTTCAAACGATCAATATGTAGAATCAG  
AACAAAGTGATTGCTGAGATTTCGCGCGAGAACCTCCACTTTGAAT-----  
TTGAAAGAGAAGGTTCGAAAACATATTTATTCTGACTCAGAAGGCGAAATGCCTGGAATACTGATGTG-----  
TACCAT-----  
GCACCTGAATTTACATATGGTAATATTCATCTCTTACCAAAAACAAGTCATTTATGGATATTATTAGGGGAGCCC-----  
-TGGAGATACAGT-----CTAGGCCCTTGTTCGATCCACAAGGATCAAGATCAAATGAACGCTTATTCTCTT-----  
TCTGTC---AAGCCAAGATATATTGCT-----AACCC-----TCAGTAACTAATAATCAA-----  
-----  
-----GTGAGACACAAATTTTTTAGTTTCGTATTTT---  
TCTGGTAAAAATCAAAAAGGAGATAGGATT-----CCT-----GATTGT---TCA---GAACTG-----  
AATCGAATGACATGTACG-----GATCATTCTAATCTCAGATATCCGGCCATTCTCGACGGTAATTCTGAT-----  
TTATTGGCAAAGAGGCGAAGAAATAGATTTCATCATCCCACTCGAA-----TCGATTCAAGAA-----  
GGCGAGAACCAACTAATA---CCTTCTTCA-----  
GGTATCTCAATGGAAATACCCAGAAATGGTATTCTCCGTAGAAATAGTATTCTTGCTTATTTTCGATGATCCTCGATATAT  
AAGA-----AAGAGCTCGGGACTT-----  
-----  
-----ACTAAATATGAGACTCGAGAACTAAATTCA-----  
-----  
ATCGTCAACGAAGAGAATTTG---ATTGAGTATCGAGGAGTCAAGGTATTTTGGCCAAAATAC-----  
CAAAAGGAAGTAAATCCATTTTTTTTTTATTCCCCTGGAAGTCCACATTTTGTCCGAATCTTCTTCC---  
ATAATGGTACGGCACAATAGTATTATTGGGGCAGATACACAAATCACTTTCAATAGA-----  
AGAAGTCCGGTAGGCGGATTGGTCCGAGTGAAGAAAAAAGCAGAAAAAATG---  
AAACTGATAATCTTTTCTGGAGATATCCATTTTCTGGAAAGACAAATAAG-----GCATTCCGA-----  
TTGATA-----CCGCCAGGAGGGGGAAAACCA---AAT-----TCCAAAGAATAC-----AAAAAATTG--  
----AAAAATTGGCTCTATATCCAACGA-----ATGAACTTTCCAGGTATGAA-----  
-----  
Liriodendron ACCAGTTCTTCTCCCGAGTTGAGACCAATCATTTCAGATAGATGGGGGTAAACCAATGAGTTCG--  
-  
GATATTAATGAACTCTATCGAAGAGTTATCTATCGGAACAATACTCTTACCAGTCCATTAACAACAAGTAGATCTACGCC  
AGGGGAATCAGTAATGTGTGTCAGGAGAAATTGGTACAAGAAGCCGTGGATACACTTCTTGATAATGGGATCCGCGGACAAC  
CAATGAGGGACGGTCATAATAAAGTTTTACAAGTCGTTTTTCAGATGTAATTGAAGGCAAAGAGGGGAAGATTTTCGTGAGACT  
CTACTTGGTAAACGGGTCGATTATTCGGGGCGTTCCGTTATTGTGCTGGGCCCTTCGCTTTTATTACATCGATGTGGATT  
ACCTAGAGAAATAGCAATAGAGCTTTTCCAGACATTTGTCTTTCGTTCTAATCAGACAACATGTTGCTTCTAACATAG  
GGATTGCTAAAAGTAAAATTAGGGAAAAAGAACCAATTGTATGGGAAATACTTCAAGAAGTTATGCAGGGGCATCCTGTA  
TTGCTGAATAGAGCACCCACCCTGCATAGATTAGGCATACAGGCGTTCCAACCCATTTTGTAGGGAGGGACGCGCTATTTG  
TTTACATCCATTAGTTTCGTAAGGGATTCAATGCAGACTTTGATGGGGATCAAATGGCTGTTTCATGTACCCTTATCTTTGG  
AAGCTCAAGCGGAGGCTCGTTTACTTATGTTTTCTCATATGAATCTCTTGTCTCCAGCTATTGGAGATCCCATTTCCGTA  
CCAACCTCAAGATATGCTTATTGGACTCTATATATTAACGATCGGGAATCGTCGAGGTATTTGTTCAAATAGGTATAATCC  
ATGT-----AATCGA-----AGAAAC-----TATCAAATGAA---ACGGTT---GACTAT-----

-----  
AATAAGTATACGAAAGAGAAAGAACCTTATTTTTGTAGTTCCTATGATGCACCTTGGAGCTTATCGGCAGAAACGAATCAA  
TTTAGATAGTCCTTTGTGGCTC-----CGGTGG---CGACTC-----GATCAACGTGTTATTGCCTCA-----  
AGAGAAGTTCCCATCGAAGTTCAATATGAATCTTTGGGTACCTATCATGAGATTTATGGGCACTATCTAATAGTAAGAAG  
TGTAAGAAAAAGAAATCCTTTGTATATACATTCGAACAACCTGTTGGTCATATTTCTTTTTATCGAGAAATAGAAGAAGCCA  
TACAAGGGTTTTGTGGGCTACTTATACGATACC-----  
-----ATGGAGGTA-----CTTATGGCAGAA---CGGGCCGATCTGGTCTTT--  
-----

CACAATAAAGTGATAGATGCAACTGCCATGAAACGACTTATTAGCAGATTAATAGATCACTTCGGAATGGCATATACATC  
GCACATCCTGGATCAAGTAAAGACTCTGGGTTTCCAGCAAGCCACTGCTACATCCATTTTCATTAGGAATTGATGATCTTT  
TAACAATACCTTCTAAGGGGTGGCTAGTCCAAGATGCTGAACAACAAAGTTTGATTTTAGAAAAGCACCATCATTATGGG  
AATGTACACGCGGTAGAAAAATTGCGTCAATCCATTGAGATATGGTATGCTACAAGTGAATATTTGAGACAAGAAATGCA  
TCCTAATTTTTAGGATGACTGATCCTTCTAATCCAGTCCATATAATGTCCTTTTTCGGGAGCTAGAGGAAATGCATCTCAGG  
TACACCAATTAGTAGGTATGAGAGGATTAATGTCGGACCCCCAAGGACAAATGATTGATTTACCCATTCAAAGCAATTTA  
CGCGAAGGACTTTCTTTAACGGAATATATAATTTCTGCTACGGAGCCCGCAAAGGAGTTGTGGATACTGCTGTACGAAC  
ATCAGATGCTGGATACCTCACGCGTAGACTTGTGGAAGTAGTTCAACACATTGTTGTGCGTAGAACAGATTGTGGCACTA  
TCCGAGGTATTTCCGTGAGTCCTCGA-----AATGGG-----  
-----ATGACGGAAAAAATTTTGATCCAAACA-----

CTAATTGGTCGTGTATTAGCAGACGATATATATATGGGTCTACGATGCATTGCCACTCGAAATCAAGATATTGGGATTGG  
ACTTGTCAATCGATTACATAACC-----  
TTTCGAGCACAATCAATATATATTTGAACCCCTTTATTTGTAGGAGTACATCTTGGATCTGTAGATTATGTTATGGTCCG  
GAGTCCCACT-----  
CATGGCGATCTGGTGAATTTGGGAGAAGCAGTAGGTATTATTGCGGGTCAATCAATTTGGGGAACCAGGGACTCAACTAAC  
ATTAAGAATTTTTCATACTGGTGGAGTATTTACAGGTGGTACTGCAGAACATGTACGAGCTCCTTCTAATGGAAAAATAA  
AATTCAT-----

GAGTGTTTGGTTCATCCACACGTACACGTACATGGACATCCTGCTTTTTCTATGTTATATAGACCTGTATGTAACCTATTGA  
GAGTCAGGATATTATACATAATGTGAATATTTCCACCAAAAAGTTTTCTTTTAGTTCAAAATGATCAATATGTAGAATCAG  
AACAAAGTGATTGCTGAGATTCGCGCTGGAACATCCACTTTCAAT-----  
TTTTAAAGAGAGGGTTTCGAAAACATATTTATTCTGACTCAGAGGGAGAAATGCACTGGAGTACCGATGTG-----  
TACCAT-----  
GCGCCTGAATATAGATACGGTAATGTTTCATCTTTACCAAAAAAAGTCAATTTATGGATATTATCAGGAGGTCCG-----  
-TGCAGATCCAGT-----ATAGTCCCTTTTTCGCTCCACAAGGATCAAGATCAAATGAATGTTTCATTCTCTT-----  
TCTGTC---GAACGGAGATATATTTCT-----GACCTC-----TCAGTACTAATGATCGA-----  
-----

-----GTGAGACACAAATTGTTTAGTTTCGGATCCT---TCCGGTAAA-----  
-AAAAAGGAGAGGATT-----CTT-----GATTAT---TCA---GGACCT-----GATCGAATCGTATCTAAT-  
-----GGTCATTGGAATTTCTATATCCTGCCATTCTCCACGAGAATTCTGAT-----  
TTATTGGCGAAGAGGGCGAAGAAATAGATTATCATATCCATTCCAA-----TATGATCAAGAA-----  
CGGGAGAAAGAACTAATG---CCCCGTTCT-----  
GGTATCTCGATTGAAATACCCATAAATGGTATTTTACGTAGAGATACTATTCTTGCTATTTTCGACGATCCCCGATACAG  
AAGA-----AGCAGTTCAGGAATT-----  
-----

-----ACTAAATATGGGACCATAGAGGTGGATTCA-----

ATCGTCAAAAAAGAGGATTTG---ATTGAGTATCGAGGGGCAAAAGAATTTAGGCCGAAATAC-----  
CAAATGAAAGTAGATCGATTTTTTTTTTTCATTCCCAGAAAGTGCATATCTTACCCGGATCTTCGCC---  
ATAATGGTACGGAACAATAGTATCATTGGAGTAGATACACGAATCGCTTTAAATACA-----  
AGAAGCCGAGTAGGTGGATTGGTCCGAGTGGAGAGAAAAAAAAAAAAAGATT---  
GAACTGAAAATCTTTTCTGGAGATATCCATTTTCTGGAGAGACAGATAAG-----  
ATATCCCGGCACAGCGGCATCTTGATA-----CCACCAGGAACGGGAAAAAAA---AAT-----  
TCTAAGGAATCA-----AAAAAATGG-----AAAAATTGGATCTATGTCCAACGG-----ATCACACCTACCAAG--  
-----



-----  
-----  
Lotus ACCAGTTCCTCCTCCCGAATTGAGACCTATTATTCAAATAGATGGGGGTAAACTAATGAGTTCG--

-----  
-----  
GATATTAATGAACTCTATAGAAGAGTTATTTATCGGAACAATACTCTTATCGATCTATTGACAACAAGTAGATCTACGCC  
GGGAGAATTAGTAATGTGTCAAGAAAAATTGGTACAAGAAGCCGTCGATACACTTCTTGATAATGGAATCCGGGGACAGC  
CAATGAAGGACGGTCATAATAAGGTTTACAAATCATTTCAGATATAATTGAAGGGAAAGAGGGAAAGATTTTCGCGAGACT  
CTGCTTGGCAAACGAGTTGATTATTCGGGGCGTTCTGTCAATTGTTGTAGGTCCATCACTTTTCATTACATCGATGTGGATT  
GCCCCGTGAAATAGCAATAGAGCTTTTCCAGACATTTCTAATTCGTAGTTTAATTCGAAAACACTTTGCTTCGAACATAG  
GGGTTGCTAAGAGTAAAAATTCGGGAAAAAGAGCCGATTGTATGGGAAATACTTCAAGAAGTTATGCGGGGACATCCTATA  
TTGCTGAATAGAGCACCACCTTTGCATAGATTAGGGATAACAAGCCTTCCAACCTATTTTAGTGGAAAGACGTGTCTATTTG  
TTTACATCCATTAGTGTGTAAGGGGTTCAATGCAGACTTTGATGGGGATCAAATGGCTATTCATGTCCCTTTATCTTTGG  
AGGCTCAAGCAGAAGCTCGTTTACTTATGTTTTCTCATACGAACCTTTTGTCTCCGGCTATTGGGGATCCCATTGCCGTA  
CCAACCTCAAGATATGCTTATTGGACTTTACATATTAACGAGCGGAAATCGTCGAGGTATTTGTGCAAATAGGTATAATCG  
AAGT-----AATTGG-----AAAAAT-----TCTAAAAATGAA---AAAATT---CGCGAT-----  
-----AAG-----

AAATATATGAAAAAAAAGAACCTTTTTTTTTCTAATTCCTATGATGCAATTGGAGCTTTTCGACAGAAAAAAATCAATTT  
TGATAGCCCTTTTTGGCTC-----CGGTGG---CGATTA-----GATAAATGCATTATGTCTGCA-----  
AGAGAGGCTCCTATCGAAGTTCCTATGAATCTTTGGGTACCTATCATGATATTTATGAACATTATTTAGTAATAAGAAG  
TATAAAAAACAAATTTGTTGCATATACATTCGAACTACTATTGGTCAATTTCTTTTTATAGAGAAATCGAAGAAGCTA  
TACAAGGCTTTTGTGCGAGGCTAT-----  
-----ATGGCAGAA---CGGGCCAATCTAGTCTTT--  
-----

CATAATAAAGTAATAGGTGGAAGTCCATAAAAACGAATTATTAGTAGATTAATAGATCATTTCGGAATGGCGTATACATC  
ACATATTCTGGATCAAGTAAAGACTCTTGGGTTCCGTCGCAAGCTACTACGACATCTATTTTCATTAGGAATTGATGACCTTT  
TAACAATACCTTCTAAGGGATGGTTAGTCCAAGATGCTGAACAACAAAGTTTGATTTTGGAAAAACATCATCATTATGGG  
AATGTACATGCGGTAGAAAAATTACGTCAATCCATTGAGATATGGTATGCTACAAGTGAATATTTGCGACAAGAAATGAA  
TCCCAATTTTAGTATGACTGACCCCTTTAATCCAGTCCATATAATGTCTTTTTCGGGAGCTAGGGGAAATGCATCTCAAG  
TGCACCAATTTAGTAGGATGAGAGGATTAATGTCGAGTCCCCAGGGCCAAATGATTGATTTACCCATTCAAAGCAATTTA  
CGTGAAGGACTTTCTTTAACAGAAATATATTTCTTGTATGAGCCCGCAAGGGGGTTGTGGTACTGCTGTACGAAAC  
ATCAGATGCTGGATATCTTACACGGAGACTTGTGTAAGTGGTTCAACACATTGTTGTACGCCGAACAGATTGCGGTACCG  
TTGAGGGATTTCTGTAAATACTCGG-----AATAGA-----  
-----ATGATGTCAGAAAGAATTTTGATACAAACA-----

TTAATTGGTCTGTATTAGCAGACGATATATATATAGGGTTCGCGATGCATTGTCTGTTAGAAATCAAGATATTGGAATTGG  
ACTTATCAATCGATTTCATAAAC-----  
TTTCAAACACAACCAATATTTATCCGAACCCCTTTACCTGTAGGAATACGTCTTGGATCTGTGATTATGTTACGGGCG  
GAGTCCTATT-----

CATGGAAACCTGGTTCGAATTGGGAGAAGCTGTAGGTATTATAGCCGGCCAATCTATTGGAGAACCTGGTACTCAATTAAC  
ATTAAGAACTTTTCATACTGGCGGAGTCTTACGGGTGGTACCGCCGAATATGTGCGATCCCCCTCGAATGGTAAATAA  
AATTCAT-----

GAGAATTCGGCTTACCCTACACGTACACGTATGGACATCCTGCCTTTTTATGTTATATAGACTTATATGTAACCTATTGA  
AAGTAACGATATTATGCATAACGTAATTATCCACCCAAAAGTTTTTTATTAGTTCAAATGATCAATATGTAAAATCTG  
AACAAATAATTGCCGAGATCCGTGCAGGAACATATACTTTAAAT-----  
TTGAAAGAAAAGGTTTCGAAAACATATTTTTTCTGATTTCGGAAGGAGAAATGCATTGGAGTACAAATATA-----  
TATCAC-----

GTTTCTGAGTTTGCATATAGTAATGTACATATCTTACCAAAAACAAGCCATTTGTGGATATTATCGGGAAATTCA-----  
-CACAAGTCTGAT-----ACAGTTTCTTTGTCACTTCTTAAGGATCAAGATCAAATGAGCACTCATTCCCTT-----  
CCTACT---GCAAAAAGAAATACTTCG-----AACTTT-----TTAGTAAGTAATAATCAA-----  
-----

-----GTACGA-----  
-----CTATGTCCG-

-----GATCATTGTCAATTTTATGCATCCTACTATTTCCCCCGATACTTCGAAT-----  
TTATTAGCAAAAAGCGAAGAAATAGATTCATTATTTCCATTTCTATTCCGATCAATTCGAGAA-----  
CGAAACAACGAGCTAATG---CCC-----  
GATATCTCGGTTGAAATACCTATCGATGGTATTATTCATAAAAATAGTATTCTTGCTTATTTTCGATGATCCTCAATACAG  
AACAA-----CAGAGTTCGGGAATT-----  
-----



GAGTGAAGATATTATACATAACGTGACTATTCCGCCAAAAAGTTTTATTTTAGTTCAAAACGATCAATATGTAGAATCAG  
AACAAAGTGATTGCTGAGATTTCGCGCGGGAACATACACTTTTCAT-----  
TTTAAAGAGAGGGTTCGAAAACATATTTATTCTGACTCAGAGGGGGAAATGCCTGGAGTACCGATGTA-----  
TATCAT-----  
GCACCCGATTTTACATATAGTAATGTACATCTCTTACCAAAAACAAGTCATTTATGGATATTATCAGGAGGCTCG-----  
-TACAAATCCAGT-----GTAGTCCCTTTTTCAATCCATAAAGATCAAGATCAAACGAACGTTTTATTTCTT-----  
TCTGCAGCAAAAAGGAAAAGCTAGAAAT-----AGCTTT-----TCAGTAAATAATGATCAAGATCAA-----  
-----  
-----GGGAAACACAAATTCTTTACTTTCGGGTCTT---TCTGGTAAA-----  
-AAAGAAAGCGGTATT-----CCT-----GATTAT---TCA---GAATTT-----AATCGAATCTTAGATACG-  
-----  
GATCATTCTAATCTCATATTTCTTCTATTCTCCACAAGGATTCTGATTTATTTTTATTGGCAAAGAGGGCGAAGAAATCG  
ATTCATCATTCCATTCCAA-----TGGATTCAAGAA-----CGAGAGAAAGAAGTATGG---CCTCGTTCC-----  
AGTATTTTCGATTGAAATACCGATAAATGGTATTTTTTCGGAATAATAGTATTCTTGCTTATTTTGGATGATCTTCAATACAG  
AAGA-----AAGGGTTCAGGAATT-----  
-----  
-----  
-----ACTAAATATGGGGCTATAGGCTTGCATTCA-----  
-----  
ATCCTCAAAAAAGAGGATTTA---ATTGAGTATGGAGGAGTCAAAGAATTTAAGCCAAAATAC-----  
CAAACGAAAGTAGATCAATTTTTTTTCATTCCCGAGGAGGTGCATATTTTACCTGAATCTTTTTTC-----  
ATAATGGTACGAAACAATAGTATTATTGGAGTAGATACACGAATCACTTTAAATACA-----  
AGAAGCCGAGTAGGCGGATTGGTCCGAGTGGAGAAAAAAAAACAAGGATT---  
GAACCTAAAATCTTTTCTGGAGATATCCATTTTCTGTAGAGATGGATAAG-----  
ATATTCGACATAGTGGCATCTTGATA-----CCACCGGAAGGGTAAAAAAA---GAA-----  
TTTAAGGAATCA-----AAAAAATGG-----AAAAATTGGATCTATGTCCAATCG-----ATCACACCTACCAAG--  
-----  
-----  
Nandina ACCGGTTCTTCCCGAATTGAGACCGATCATTGATAGATGGGGTAAACCAATGAGTTG--  
-  
GATATTAATGAACCTATAGAAGAGTTATTTATCGGAACAATACCCTTACGGATCTATTAACAACAAGTAGATCTACGCC  
AGGGGAATTAGTAATGTGTCAGGAGAAGTTAGTACAAGAAGCCGTGGATACACTTCTTGATAATGGGATCCGCGGACAAC  
CAATGAGGGACAGTCATAATAAAGTTTACAAGTCGTTTTTCAGATGTAATGAAGGCAAAGAGGGGAAGATTTTCGTGAGACT  
CTGCTTGGTAAACGGGTCGATTATTCGGGGCGTTCCGTCATTGTGCTGGGTCCTTCGCTTTTATTACATCGATGTGGGTT  
GCCTCGCGAAATAGCAATAGAGCTTTTCCAGACATTTGTAATTCGTGGTCTAATCAGACAACACGCTGCTTCCAACATAG  
GAGTTGCCAAAAGTAAAATTAGGGAAAAAGAACCAATCGTGTGGGAAATACTTCAAGAAGTTATGCAGGGGCATCCTGTA  
TTGCTGAATAGAGCACCCACTTTGCATAGATTAGGCATACAGGCATTCCAACCCATTTTATGTTGAAGGACGTGCTATTTT  
TTTACATCCATTAGTTTGTAAAGGATTTAATGCAGACTTTGATGGGGATCAAATGGCTGTTTCATGTACCTTTTATCTTTAG  
AGGCTCAAGCAGAGGCTCGTTTACTTATGTTTTCTCATATGAATCTCTTGTCTCCAGCTATTGGAGATCCCATTTCCGTA  
CCAACCTCAAGATATGCTTATGGGACTCTATGTATTAACGACTGGGAATCATCGAGGTATTTGTGCAAATAGGTATAATCC  
AAGT-----AATCAC-----AGAAAC-----TATCAAAATGAA---AAAATT---GACGAT-----  
-----ATAAC-----TATAAGTATACAAA-----  
GAACCTATTTTTGTAGTTCCATGATGCACCTTGGGGCTTATCGGCAGAAACGAATCTATTTAGATAGTCTTTTGTGGCT  
C-----CGTTGG---CGACTA-----GATCAACGCGTCATTGCATCA-----  
AGAGAAGTTCCATCGAAGTTCAATATGAATCTTTGGGTACCTATCATGAGATTTATGGGCACTATCTAATAGTAAGAAA  
TGTCAAAAAAGAAATCCTTTGTATAGATATTCGAACCACTGTTGGTCATATTTCTTTTTATCGAGAAATAGAAGAAGCCA  
TACAAGGGTTTTTGCCTGGCTTGTCTACACGGTACTTAA-----  
-----ATGGCAGAA---CGGGCCGATCTGGTCTTT--  
-----  
CACAATAAAGCGATAGATGGAAGTCCATGAAACGACTTATTAGCAGATTAATAGATCACTTTGGAATGGCATATACATC  
ACATATCCTGGATCAAATAAAGACTCTGGGTTTTCAACAAGCCACTGCTACATCCATTTTATTAGGAATTGATGATCTTT  
TAACAATACCTTCTAAGGGATGGTTAGTCCAAGATGCTGAACAACAAGTTTGTATTTGGAAAAACACCATCATTATGGG

AATGTACACGCGGTAGAAAAATTACGTCAATCTATTGAGATATGGTATGCTACAAGTGAATATTTGCGACAAGAAATGAA  
TCCTAATTTTAGGATGACTGATCCTTCTAATCCAGTCCATATAATGTCTTTTTCGGGAGCTCGAGGAAATGCATCTCAGG  
TACACCAATTAGTAGGTATGAGAGGATTAATGTTCGGATCCCCAAGGACAAATGATTGATTTACCCATTCAAAGCAATTTA  
CGCGAAGGACTCTCTTTAACGGAATATATCATTTTCTGCTATGGAGCCCAGAAAGGAGTTGTGGATACTGCTGTACGAAC  
ATCAGATGCTGGATACCTCACGCGCAGACTTGTTGAAGTAGTTCAACACATTGTTGTACGTAGAACAGATTGTGGCACTC  
TCCGGGGTAGTTCCGTAAGTCTCGA-----AATGGG-----  
-----ACGATAACAGAAAGAATTTTTATCCAAACA-----  
TTAATTGGTCGTGTATTAGCAGACGATATATATATAGGTTCCCGGTGTATTGCCATTGAAATCAAGATATTGGGATTGG  
ACTTGTGAATCGATTTCATAACC-----  
TTTCGAGCACAACCAATATCTATTTCGAACCCCTTTACTTGCAAAAGTACATCTTGGATCTGTGATTATGTTATGGTGC  
GAGTCCCCT-----  
CATGGTGACCTGGTTCGAATTGGGAGAAGCAGTAGGTATTATTGCGGGTCAATCTATTGGGAACTGGGACTCAACTAAC  
ATTAAGAACTTTTCATACCGGTGGAGTATTCACAGGCGGTACTGCAGAACATGTCCGAGCTCCTTCTAATGGAAAAATA  
AATTCAA-----  
GAAGATTTGGTTCATCCACACGTCACGTCATGGTTCATCTGCTTTTTCTATGTTATATAGATCTATATGTAACCTATTGA  
GGGTCAAGATATTCGACATAATGTGACTATTCCTCCAAAAAGTTTTCTTTTAGTTCAAATGATCAATATGTAGAATCAG  
AACAGTGATTGCTGAGATTTCGCGCGGGAACATCCACCTTGAAT-----  
TTTTAAAGAGAGGGTTCGAAAACATATTTATTCCGACTCAGAGGGAGAAATGCACTGGAGTACCGCCGTG-----  
TACCAT-----  
GCACCCGAATATACATATGGTAATGTTTCATCTTACCAAAAACAAGTCATTTATGGATATTATCAGGGGGTCCA-----  
-TACAGATCTAGT-----ATAGTCTCTTTTTGCTCCACAAGGATCAAGATCAAATGAATGTTTATTCTCTT-----  
TCTGCC---GAACAAAATCCATTTCT-----AATCTC-----CTGGTGACTAATAACCAA-----  
-----  
-----GTGAGACACAAATTTTTGAGTTTCGGAGCCT---TCTGGTAAA-----  
-AAGGGGGAGAGGATT-----CTT-----GATTAT---TCA---GGACCT-----AATCGAATCATATGCAAT-  
-----GGTCATTGTAATTTTCATATATCCTGCCATTCTCCACGAGAATTTAT-----  
TTATTGGCAAAGAGGAGAAGAAATAGATTCATCATTCCATTCCAA-----TATAATCAAGAA-----  
CAAGAGAAAAGAATA-----ACCCGTTG-----  
GGTATCTCGATTGAAATACCCATAAATGGTATTTTCCGTAGAAATAGTATTCTTGCTTATTTGACGATCCCCGATACAG  
AAGA-----AACAGTTCGGGAATT-----  
-----  
-----ACTAAGTATGGGACTATAGAGGCGCATTCA-----  
-----  
ATCGTCAAAAAGAAGATTTG---ATTGAGTATCGAAAA-----AGGCCAAAATAC-----  
CAAACGAAAATAGATAGATTTTTTTTTCATTCCTCCGAGGAGTGCATATTTACCCGGATCTTCTTCC---  
GTAATGGTACGGAATAATAGTATTATTGGAGTAAATACACGAATCACTTTCAAGACA-----  
AGAAGCCGAGTAGGCGGATTGGTCCGAGTGGAGAAAAAAGATT---  
GAACTAAAAATATTTTCTGGAGATATCCATTTTCTGGAGAGACAGATAAG-----  
ATATCCTGGCACAGCGGTATCTTGATA-----CCCCCTGGAACGGGAAAAAA---AAT-----  
TCTAAGGAATCA-----AAAAATTT-----AAAAATTGGATCTATGTCCAACGG-----ATCACCCCTACCAAG--  
-----  
-----  
Nicotiana ACCAGTTCTTCTCCTGAGTTGAGACCGATCATTGAGATAGATGGGGGTAAACTAATGAGCTCA--  
-  
GATATTAATGAACTCTATAGAAGAGTTATCTATCGGAACAATACCCTTACCGATCTATTAACAACAAGTAGATCTACGCC  
AGGAGAATTAGTAATGTGTAGGAGAAATTAGTACAAGAAGCCGTGGATACTTCTTGATAATGGAATCCGGGGACAAC  
CAATGAGGGACGGTACATAATAAGTTTTACAAGTCAATTTCTGATGTAATTGAAGGCAAAGAGGGGAAGATTTCTGTGAGACT  
CTGCTTGGCAAACGAGTCGATTATTCAGGACGTTCTGTGCTATTGTGCTGGGTCCTTCACTTTCATTACATCGATGTGGATT  
GCCTCGTGAAATAGCAATAGAATTTCCAGACATTTGTAATTCTGTTGCTAATTAGACAACATCTTGTTCGAACATAG  
GAGTTGCTAAGAGTAAAATTCGAGAAAAAGAGCCGATTGTTGGGAAATCCTTCAAGAAGTTATGCAGGGACATCCTGTA  
TTGCTGAATAGAGACCCACTTTGCATAGATTAGGCATACAGGCATTCCAGCCGTTTTAGTGGAGGGGGCGCCTATTTG

TTTACATCCATTAGTTTGTCAAGGGATTCAATGCTGATTTTGGATGGAGATCAAATGGCTGTTTCATGTACCTTTATCCTTGG  
AGGCTCAAGTAGAGGCCCGTTTACTTATGTTTTCTCATATGAATCTTTTGTCTCCGGCTATTGGGGATCCCATTTCCGTA  
CCAACGCAAGATATGCTTATTGGACTCTATGTATTAACGAGCGGAAATCATCGAGGTATTTGTGTAAATAGATATAATCC  
ATGT-----AATCGC-----AGAAAC-----TATCAAATCAAAAAAGAAGT---GACAAT-----  
-----AGTCAC-----TATAAGTATACGAAA-----  
GAACCGTTTTTTTTCTAATTCCTATGATGCAATTGGGGCTTATCGGCAGAAACGAATCAATTTAGATAGTCCTTTGTGGCT  
C-----CGGTGG---CGACTA-----GATCAACGCGTTATTGCTTCA-----  
AGAGAACTCCCATCGAAGTTCACACTATGAATCTTTAGGTACTTTTTATGAGATTTATGGACACTATCTAATAGTAAGAAG  
TCTAAAAAACAATCCTTTTTATATACATTCGAACCACTGTTGGTCATATTGCTCTTTATCGAGAAATCGAAGAAGCTA  
TACAGGGTTTTCTCGGGCCTAT-----ATGGAGGTA-----CTTATGGCAGAA---CGGGCCAATCTGGTCTTT--  
-----  
CACAATAAAGCGATAAACCGGAACTGCCATGAAACGACTTATTAGTAGATTAATAGATCACTTCGGAATGGCATATACATC  
ACATATCCTGGATCAAGTAAAACTCTGGGGTTCCAACAAGCTACTGCTACATCCATTTTCATTAGGAATTGATGATCTTT  
TAACAATACCTTCTAAGGGATGGCTAGTTCAAGATGCTGAACAACAAAGTTTGATTTTGGAAAAACACCATCATTATGGG  
AATGTACACGCGGTAGAAAAATTACGTCAATCCATTGAAATATGGTATGCTACAAGTGAATATTTGCGACAAGAAATGAA  
TCCTAATTTTAGGATGACTGACCCTTTAATCCAGTTCATATAATGTCTTTCTCGGGAGCTAGAGGAAATGCATCTCAGG  
TACATCAATTAGTAGGTATGAGAGGATTAATGTCAGATCCTCAAGGACAAATGATTGATTTACCTATTCAAAGCAATTTA  
CGCGAAGGACTCTCTTAAACAGAATACATCATTTCTTGCTACGGAGCCCGTAAAGGAGTTGTGGATACTGCTGTACGAAC  
ATCAGACGCTGGATATCTCACTCGCAGACTTGTTGAAGTAGTTCAACACATTGTTGTACGTCGAACGGATTGTGGCACCG  
CCCGGGGTATTTCTGTGAGTCCTCGG-----AATGGG-----  
-----ATGATGCCGAAAGGATTTTTATCCAAACA-----  
TTAATTGGTCGTGTATTAGCAGATGATATATACATGGGTCCGCGATGTATTGCCACTAGAAATCAAGACATTGGCATTGG  
ACTTGTAATCGATTCAATCC-----  
TTTCGGGCACAACCAATCTCTATTTCGAACCTCCCTTTACTTGTAGGAGTACATCTTGGATTTGTGCGATTATGTTATGGCCG  
GAGTCCTACT-----  
CATGGCGACCTGGTTGAATTGGGGGAAGCTGTAGGTATTATTGCAGGTCAATCGATTGGAGAACCAGGGTACTCAATTAAC  
ATTAAGAATTTTCTATACCGGAGGAGTATTACGGGGGGTACTGCAGAACATGTGCGAGCCCCATCTAATGGAAAAATCA  
AATTCAT-----  
GAGGATTTGGTTCATCCGACACGTACACGTGATGGGCATCCCGCCTTTCTATGTTCTATAGACTTGTATGTAACTATTGA  
GAGTGAAGATATTCTACATAATGTGAATATTCCACCCAAAAGTTTGCTTTTAGTTCAAACGATCAATATGTAGAATCAG  
AACAAGTAATTGCTGAGATTTCGCGCAGGAATATCCACTTTGAAT-----  
TTTAAAGAGAAGGTTGAAAACATATTTATTCTGATTTCAGACGGAGAAATGCCTGGAGTACCGATGTC-----  
TATCAT-----  
GCACCCGAATTTACATACGGTAATGTTTCATCTATTACCAAAAACAAGCCATTTATGGATATTATTAGGAAGGCCG-----  
-TGCAGGTCCAGT-----CTAGTCTACCTTTTCGATCCACAAGGATCAGGATCAAATGAATGCGCATTTTCTT-----  
TCTGGC---AAGCGAAGATATACTTCT-----AACCTC-----TCAGTAACCAACGATCAG-----  
-----  
-----GCGAGGCAGAAATTATTTAGTTTCGGATTTT---TCTGGTAAA-----  
-AAAGAAGATAGGATT-----CCT-----GATTAT---TCA---GACCTT-----AATCGAATTATATGTGCT-  
-----GGTCAGTATAATCTCGTATATTTCGCTATTCTCCACGAGAATTCTGAT-----  
TTATTGTCAAAAAGGCGAAGAAATAAATTCATCATTCCACTACAC-----TCGATTCAAGAA-----  
CTCGAGAATGAACTAATG---CCCTGTTCA-----  
GGTATCTCGATTGAAATCCCGTAAATGGTATTTTCCGTCGAAATAGTATTCTTGCTTATTTTCGATGATCCTCGATACAG  
AAGA-----AAGAGTTCGGGCATT-----  
-----  
-----ATTAATATGGGACTGTAGAAACGCATTCA-----  
-----  
GTCATCAAAAAGAGGATTTG---CTTGAGTATCGAGGAGTCAAGGAATTTAGGCCAAAATAC-----  
CAAATGAAAGTAGATCGATTTTTTTTTTTCATTCTGAAGAGGTGCATATCTTGCCCGGATCTTCTTCC---  
ATAATGGTACGGAACAATAGTATCGTTGGGGTAGATACACAAATCACCTTAAATCTA-----  
AGAAGCCGAGTCGGTGGGTTGGTCCGGGTGGAGAGAAAAAACAAGCAATT---

GAACCTAAAATCTTTTCTGGAGATATCCATTTTCTGGAGAGACAGATAAG-----  
ATATCCCAGACATACCGGCGTTTTGATA-----CCACCAGGAACAGGAAAAAGA---AAT-----  
TCCAAGGAATCC-----AAAAAAGTG-----AAAAATTGGATCTATGTCCAACGG-----ATTACACCTAGCAAG--  
-----  
-----  
Nuphar ACCAGTTCTTCTCCCGAGTTGAGGCCAATCATTAGATTGATGGGGGTAAACCAATGAGTTCA--  
-  
GATATTAATGAACTTTATAGAAGAGTTATCTATCGGAACAATACTCTTACCAGTCTATTAACAACAAGTAGATCTACGCC  
GGGGGAATTAGTAATGTGTGTCAGGAAAAGTTGGTACAAGAAGCTGTAGATACACTTCTTGATAATGGGATCCGCGGACAAC  
CAATGAGGGACGGTCACAATAAAGTTTACAAGTCGTTTTAGATGTAATTGAAGGCAAAGAGGGGAAGATTTTCGCGAGACT  
CTACTTGGTAAACGGGTCGATTATTCGGGTCGTTCCGTCATTGTGGTAGGCCCTTCGCTTTCATTGCATCGATGTGGATT  
ACCTCGAGAAAATAGCAATAGAGCTTTTTAGACATTTGTAATTCGTGGTCTAATCAGACAAAATCTTGCTTCCAACATAG  
GGCTTGCTAAAAGTAAAATTCGGGAAAAAGAACCATTGTATGGGAAATACTTCAAGAAGTTATGCAGGGGCATCCTGTA  
TTGCTAAATAGAGCACCTACTTTGCATAGATTAGGCATACAGGCGTTCCAACCTATTTTAGTAGAGGGGCGAGCTATTTG  
TTTACATCCATTGGTTTGTAAAGGATTCAATGCAGACTTCGATGGAGATCAAATGGCTGTTTCATGTACCTTTATCTTTGG  
AAGCTCAAGCAGAAGCTCGTTTACTTATGTTTTCTCATAACGAATCTCTTGTCTCCAGCCATTGGGGATCCCATTTCCGTA  
CCAACCTCAAGATATGCTTATGGGGCTCTATGTATTAACGATGGGGAATCGTAGAGGTATTTGTCAAATAGGTATAATCC  
ATGT-----AACTCC-----AGAAAC-----TACCAAAATGAA---AGAACT---GATCAT-----  
-----AATAAC-----  
TATAAGTATAGGAAAGGGAAAGAACCCTATTTTTGTAGTTCTACGATGCATTGGGGCTTATCGGCAGAAAGGGATCGA  
TTTATATAGTACTTTATGGCTA-----CGGTGG---CGACTA-----  
GATCAACGTGTCATTGCCTCAATAAATAGAGAAATCCCATCGAAGTTCAATATGAATCTTTGGGCACCTTATCATGAGAT  
TTATGATCACTATCGAGTAGTAAGAAGTGTAAAAAAGGAATGCTTTGTATATACATTCGAACCACTGTTGGTCATATTT  
CTTTTTATCGAGAAAATAGAAGAAGCCGTACAGGGGTTTTGTGCGTCTATTCTAT-----  
-----ATGGAGGTA-----  
CTTATGGCAGAA---CGGGCCGATCTGGTCTTT-----  
CACAATAAAGTGATAGATGGAAGTCCCATGAAACGGCTTATTAGCAGATTAATAGATCATTTCGGAATAGCCTATAACATC  
ACACATTTCTGGATCAAGTAAAAACTCTGGGTTTTATCAAGCCACCGCTACATCCATTTTATTAGGAATTGATGATCTTT  
TAACAACACCTTCTAAGGGATGGTTAGTCCAAGATGCTGAACAACAAAGTTTGAATTTGGAAAAGCACCATCATTATGGG  
AATGTACACGCTGTAGAAAAATTACGTCAATCAATTGAGATATGGTATGCTACAAGTGAATATTTGAGACAAGAAATGAA  
TCTTAATTTTAGGATGACTGATCCTTCTAATCCAGTCCATATAATGTCCTATTCTGGAGCTAGAGGAAATGCATCTCAGG  
TCCACCAATTAGTAGGCATGAGAGGATTAATGTCAGATCCCCAAGGACAAATGATTGATTTACCCATTCAAAGCAATTTA  
CGCGAAGGACTTTCTTTAACGGAATATAACCATTTCTGCTACGGAGCCCGCAAAGGAGTTGTGGATACTGCTGTACGAAC  
GTCAGACGCTGGATACCTCACGCGTAGACTTGTGTAAGTAGTTCAACATATTGTTGTACGTAGAACGGATTGTGGAAC  
CCCGAGGTATTTCCGTGAGTCTTCGA-----AAGGGG-----  
-----ATGACGGAAAGAATTTTTATCCAAACA-----  
TTGATAGGTCGCGTATTAGCAAACGATGTCTATCTGGGTCTACGATGCATTGCCACCAGAAATCAAGATATTGGGATTGG  
ACTTGTCAATCGATTTCATGACC-----  
TCTCGGGCGCAGCCAATATATATTCGAACTCCCTTCACTTGCCGAAGTGCATCTTGGATCTGTGATTATGTTATGGTTCG  
GAGTCCCACT-----  
CATGGTGACCTGGTTGAATTGGGAGAAGCAGTAGGTATTATTGCGGGTCAATCCATTGGAGAACCAGGGACTCAACTAAC  
ATTAAGAATTTTTCATACCGGTGGAGTATTCACAGGCGGTACTGCAGAACATGTACGAGCTCCTTCTAATGGAAAAATCA  
AATTCAAT-----  
GAGGATTTGGTTCATCCACACGCACGCGTCATGGACATCTGCTTTTTCTCTGCTATGTAGACCTATATGTGACTATTGA  
GAGTCAGGATATTATACATAGTGTGAATATCCACCAAAAAGTTTTCTTTTGGTTCAAATGATCAATATGTGGAATCAG  
AACAAGTGATTGCTGAGATTCGCGCTGGAACATCCACTTTCCAT-----  
TTTAAAGAGAGGGTTTCAAAAACATATTTATTCTGACTCAGAGGGGAGAAATGCATTGGAGTACCGATGTG-----  
TACCAT-----  
GCACCTGAATATACACACGGTAATGTTCAATTTCTTACCCCAAACAAGTCATTTATGGATCTTATCTGGAGGTCCG-----  
-TGCAAATCCAGT-----CTAGTGCCTTTTTCACTCCACAAGGATCAAGATCAAATGAATGTTCAATCTCTT-----  
TCTGTC---CAAGAGAGATATATTTCT-----GACTTC-----TCGGTGAATAATAATCGA-----  
-----  
-----GTGAGACACAAATTGTTTGGCTCAGATCCC---CTGGCGAAA-----  
-AGAGGGCAGAGGATT-----TCT-----GATTATGCAGCA---GGATTT-----GAGCGAGTCATATCCAAT-  
-----GGGCATTGGGATTTTCATATATCCCGCCATTCTCCGAGAGAATTTTAT-----

TTATTGGCGAAGAGGGCGAAGAAATAGATTCATCATAACCATTCCAA-----TATGATCCGGAA-----  
CGGGAGAAGGAACACTAACG---  
CCCCGTTCTAGTACTAGTATCGCGGTTGAAATACCCGCAAATGGTATTTTACGTAGAAATAGTATTCTTGCTTATTTTGA  
CGATCCACGATACAGAAGA-----AGCAGTTCGGGAATT-----  
-----  
-----  
-----  
-----  
-----

ACCAAATATGGCACCATAGAGGTCGATTCA-----  
-----ATCGTCAAAAAAGAGGGTTTG---  
ATTGAGTATAGAGGACCGAAAGAATCTAGACCGAAATAC-----  
CAAATGAAAGTAGATCGATTTTTTGTATTCCCGAAGAAGTCCATATCTTGCCCGGTCTTCGTCC---  
ATAATGGTACGGAACAATAGTATCATTGGAGTAGATACACGAATCACGTTTAATACA-----  
AGAAGCCAAATAGGTGGATTGGTCCGAGTAGAGAAAAAAAAAAAAAAAAAGATT---  
GAACTGAAAATCTTTTCTGGAGGTATCCATTTTCTGGAGAAACAGATAAG-----  
ATATCCCGACACATTGGTATCTTGATA-----CCACCAGGAGCGAGAAAAAAAA---ATG-----  
GATAAGGGATCAAAGGGGAAAAATTGGGAAGGGAAAAATTGGGTCTATGTCCAACGG-----ATCACACCTATCAAG--  
-----  
-----  
-----

Nymphaea ACCAGTTCTTCCCTCCCGAGTTGAGGCCAATCATTAGATTGATGGGGGTAAATCAATGAGTTCA--  
-

GATATTAATGAACTTTATAGAAGAGTTATCTATCGCAACAATACTCTTACCGATCTATTAACAACAAGTAGATCTACGCC  
GGGGGAATTAGTAATGTGTGTCAGGAAAAATTGGTACAAGAAGCTGTAGATACACTTCTTGATAATGGGATCCGCGGACAAC  
CAATGAGGGACGGTCACAATAAAGTTTACAAGTCGTTTTAGATGTAATTGAAGGCAAAGAGGGGAAGATTTTCGCGAGACT  
CTACTTGGTAAACGGGTCGATTATTCGGGTCTCCGTCATTTGTGGTAGGCCCTTCGCTTTCTACTGCATCAATGTGGATT  
ACTTCGAGAAAATAGCAATAGAGCTTTTTTTCAGACATTTGTAATTCGTGGTCTAATCAGACAACATCTTGCTTCCAACATAG  
GACTTGCTAAAAGTAAAATTTCGGGAAAAAGAACCATTGTATGGGAAATACTTCAAGAAGTTATGCAGGGGCATCCTGTA  
TTGCTAAATAGAGCACCCACTTTGCATAGATTAGGCATACAGGCGTTCCAACCTATTTTGTAGTGGAGGGACGAGCTATTTG  
TTTACATCCATTGGTTTTGTAAGGGATTCAATGCGGACTTCGATGGAGATCAAATGGCTGTTTCATGTACCTTTATCTTTGG  
AAGCTCAAGCAGAAGCTCGCTTACTTATGTTTTCTCATAACGAATCTCTTGTCTCCAGCCATTGGGGATCCCATTTCCGTA  
CCCCTCAAGATATGCTTATGGGGCTCTATGTATTAACGATGGGGAATCGTAGAGGTATTTGTGCAAATAGGTATAATCC  
ATGT-----AACCC-----AGAAC-----CACCAGAATGAA---AGAATG---GATCAT-----  
-----AGTAAT-----

TATGAGTATAGGAAAGGGAAAGAACCCTATTTTTGTAGTTCTACGATGCCTTGGGGCTTATCGGCAGAAAGGGATCGA  
TTTATATAGTACTTTATGGCTA-----CGGTGG---CGACTA-----  
GATCAACGTGTCTATTGCCTCAATAAATAGAGAAGTTCCCATCGAAGTTCAATATGAATCTTTGGGCCTTATCATGAGAT  
TTATGATCACTATCGAGTAGTAAGAAGTGAAAAAAGGAATGCTTTGTATATATATTCGAACTACTGTTGGTCATATTT  
CCTTTTATCGAGAAATAGAAGAAGCCATACAGGGGTTTTGTGCGTCTTATTCATATGGTACC-----  
-----ATGGAGGTA-----

CTTATGGCAGAA---CGGGCCGATCTGGTCTTT-----  
CACAATAAAGTGATAGATGGAAGTGCATGAAACGGCTTATTAGCAGATTAATAGATCATTTCGGAATAGCCTATAACATC  
ACACATTCTGGATCAAGTAAAAACTCTGGGTTTTAGCAAGCCACCGCTACATCAATTTTATTAGGAATTGATGATCTTT  
TAACAACACCTTCTAAGAGATGGTTAGTCCAAGATGCTGAACAACAAGTTTGATTTTGGAAAAGCACCATTATTATGGG  
AATGTACACCGGTAGAAAAATTACGTCAATCAATCGAGATATGGTATGCTACAAGTGAATATTTGAGACAAGAAATGAA  
TCTTAATTTAAGATGACTGATCCTTCAAATCCAGTCCATATAATGTCTTATTCTGGAGCTAGAGGAAATGCATCTCAGG  
TCCACCAATTAGTAGGTATGAGAGGATTAATGTGAGATCCCAAGGACAAATGATTGATTTACCCATTCAAAGCAATTTA  
CGCGAAGGACTTTCTTTAACGGAATATACAATTTCTGCTACGGAGCCCGCAAAGGAGTTGTGGATACTGCTGTACGAAC  
GTCAGACGCTGGATACCTCACGCGTAGACTTGTGTAAGTAGTTCAGCATATTGTTGTACGTAGAACAGATTGTGGAAGTA  
CCCAGGTATTTCCGTGAGTTTTTCGA-----AAGGG-----  
-----ATGACGGAAAGAATTTTTATCCAAAC-----

CTAATAGGTCGCGTATTAGCGAACGATGTATATCTAGGTCTACGATGCATTGCTACCAGAAATCAAGATATTGGGATTGG  
GCTTGTCAATCGATTTCATGACC-----  
TCTCGGGCGCAGCCAATATATATTCGAACTCCCTTCACTTGCCGAAGTGCATCTTGGATCTGTGATTATGTTATGGTCCG  
GAGTCCACT-----





-----ATGGACGAA---GGAGTCAACCTAGTCTTT--  
-----  
CACAAGAAAGTAATAGATGGAAGTCCATTAAAAGACTTATTAGCCGATTAATAGATCACTTCGGAATGGCACATACATC  
ACACATTCTAGATCAAGTAAAGACTCTGGGTTTCCAGCAAGCCACTGCTACATCCATTTTCATTAGGGATTGATGATCTTT  
TAACGATACCTTCTAAGGGTTGGTTAGTACAAGATGGTGAGCAACAAAGTTTGAGTTTGAAAAACACCACCATTACGGG  
AATGTACACGCAGTAGAAAAGTTACGCCAATCCATTGAAGTATGGTATGCTACAAGTGAATATTTGCGACAAGAAATGAA  
TCCTAATTTTAGGATGACCGACCCCTTTAATCCAGTCCACATAATGTCTTTTTTCGGGAGCCAGAGGAAATGCATCTCAAG  
TACACCAATTAGTAGGTATGAGAGGATTAATGTCCGATCCTCAAGGACAAATGATTGATTTACCTATTCAAAGCAATTTA  
CGCGAGGGACTGTCGTTAACAGAATATATCATTCTTGTACGGAGCCCAGAAAGGAGTTGTGGATACTGCTGTACGAAC  
ATCCGATGCTGGATATCTTACGCGCAGGCTTGTTGAAGTAGTTC AACACATTGTTGTACGTAGAACAGATTGTGGAACCC  
TCCGCGGGATTTCTGTGAGTCTCGG-----  
-----AGGATGCCGGAAGAATTTTTATTCAAACA-----  
TTAATTGGTCGTGATTAGCAGACGATATATATATAGGCTCACGGTGTATTGCCATTAGAAATCAAGATATTGGAATTGG  
ACTTGTCAATCGATTCAATAACC-----  
TTTGAATCCAACCAATATCCATCCGAACCCCTTTACTGGTAGAAGTCCTTCTTGGATCTGTCGATTATGTTATGGTAG  
GAGTCTTACC-----  
CATGGTGACCTGGTTCGAATTTGGGAGAAGCTGTAGGTATTATTGCGGGTCAATCTATTGGAGAACC GG TACTCAACTAAC  
ATTAAGA ACTTTTTCTACTGGCGGAGTATTCACAGGTGGTACTGCAGAACATGTACGGGCCCCCTCGAATGGAAAAATAA  
AATTCAATTTCAATGAGGCTTTGGTTTCATCCCGCAGTACGCGTATGGGCATCCTGCCCTTCTCTGTTCTATGGACTTG  
GATGTA ACTATTGAGAGTGAAGATATTCTACATAACCTGACTATTCCGCCAAAAAGTTTTCTTTTGGTTCAAATAATCA  
ATATGTAGAATCAGAACAAGTCATTGCCGAGATTTGCGCGGGAACATCCACTTTCCAT-----  
TTTAAAGAAAGGGTTCGAAAACATATTTATTCCGACTCTGAGGGAGAAATGCACTGGAGTACCGATGTG-----  
TACCAT-----  
GCACCCGAATTTACATATAGCAATGTCCATCTTTTACCAAAAACAAGTCATTTATGGATATTATCAGGAGGTTTCG-----  
-TGCAGATCCCGC-----GGAGCTCCGTTTTACTCCACAAGGATCAAGATCAAATGAATCCTCGTTTCGACA-----  
GAAAGA--GAACGAAGATATCTTTTCG-----AGTCTC-----TCAGCTAATAATGATCAA-----

-----ATCAGATACAAATTTCTTTAGTTCTTCTTTT---TCTGGTAAAAAA---  
-AAAGACGATAGGGAG---TCCTG-----GTTTATT--TCA---GAAATG-----AATCGAATCATATGTACT-  
-----CTTCATTGTAATCTCATATATCCTTTCGATTCTACGTGAGAATTTCTGAT-----  
TTATTGGCAAAAAGGAGAAGAAATCGACTTGTCTATCCAGTCCAA-----TCGAGTCAAGAA-----  
CGAGAGAAAGA ACTAATA---CCCCATTCA-----  
GGTATTTTCGATTGAACTGCCCATAAATGGTATTTTCCGGAAAAAGAGTATTCTTGCTTTTTTTTGATGATCCTCGATACAG  
AACA-----AAGAGTTCGGGAATT-----

-----ACTCAATATGAGACTATGGGGATGCACTCC-----  
-----  
ATCGTTAAAAAAGAGGGTTTG---GTTGATTATCGAGGAATCAACGAATTTAAGCCAAAATAC-----  
CAAATGACAATAGATCGATTTTTTTTTTCATTCCCGAAGAAGTACATATTTTACCTGAGTCTTCTTTCG---  
ATAATGGTACGGAATAATAGTCTGATTGGAGTAGATACACGAATCGCTTTAAATACA-----  
AGAAGCAGAGCGGGCGGATTAGTCCGAGTGGAGAGAAAAAAAAGGGGGATT---  
GCACTTCAAATCTTTTCTGGA ACTATCCATTTTCTGGAGAGACAGATAAG-----  
ATATCCTGGGACAGTGGCATCTTGATA-----CCACCAGGAACAGGAAAAAGA---AAT-----  
TCTAAGGAATCC-----AAAAAATGG-----AAAAATGGGATCTATGTCCAAAGG-----ATCACACCTACTAAG--

Oryza ACCAGTTCTTCTCCCGAATTAAGACCCATTGTTTATAGGTCTGGGGATAAAGTAGTACTTCG--  
-  
GATATTAATGAACTTTATAAGAGAGTTATCCGTCGGAACAACAATCTTGCTTATCTATTAAAAAGAAGTGAATTAGCGCC  
AGCAGATTTAGTAATGTGCCAGGAAAAATTGGTACAAGAAGCCGTGGATACACTTCTTGATAGTGGGTCCCGCGGGCAAC  
CAACGAGGGATGGTACAATAAAGTATACAAATCACTTTTCAGATGTAATTGAAGGTAAAGAGGGGAGTTTTCGCGAACT

CTGCTTGGGAAACGGGTCGATTACTCGGGCGTTCTGTTCATTGTTGTGGGTCCTTCACTTTTATTACATCAATGTGGGTT  
ACCTCTAGAGATAGCAATAAAGCTTTTTTTCAGCTATTTTGTAAATTCGCGATTTAATCACGAAACGTGCTACTTCTAATGTTA  
GGATTGCTAAAAGGAAAATTTGGGAAAAGGAACCCATTGTATGGGAAATACTTCAAGAAGTTATGAGGGGACATCCTGTA  
CTGTTGAATAGAGCACCTACCCTGCATAGATTAGGCATACAGGCTTTCCAACCCACTTTAGTAGAGGGGGCGTACTATTTG  
TTTACACCCATTAGTGTGTAAAGGTTTTCAATGCAGACTTTGATGGGGATCAAATGGCTGTTTCATCTACCTTTATCCTTGG  
AAGCTCAGGCGGAAGCTCGTTTACTTATGTTTTTCTCATATGAATCTCCTATCTCCCGCTATTGGGGATCCTATTTGCGTA  
CCAACCCAAGACATGCTTATCGGACTTTATGTATTAACGATTGGAAACCGTCGAGGTATTTGTGCAAATAGATATAAT--  
-----AGTTGC-----GAAAC-----TATCCAAACCAA--AAAGTAAATTACAAT-----  
-----AATAATAAT---

CCTAAGTATACGAAAGATAAAGAATCTCTTTTTTCTAGTTTCTATGATGCCTGGGAGCTTATAGACAGAAACAAATCTG  
TTTAGACAGTCCCTTTGTGGCTC-----CGATGG---AAACTA-----GATCAACGCGTCATTGGGTTA-----  
AGAGAAGTTCCGATTGAAGTTCAATATGAATCTTTGGGGACTTATCGTGAGATTTATGCCACTATCTAGTAGTGGGAAA  
TAGAAAAAAGGAAATCCGTTTCTATATACATTCGCACCACTCTTGGTCATATTTCTTTTTATAGAGAAATAGAGGAAGCCA  
TACAAGGATTTAGTCAGGCCTAT-----  
-----ATGGCGGAA---CGGGCCAATCTGGTCTTT--  
-----

CAGAATAAAGAGATAGATGGAACGCTATGAAACGACTTATTAGCAGATTAATAGATCATTTCGGAATGGGATATACATC  
CCATATACTGGATCAAATAAAAACGCTGGGCTTCCATCAAGCCACTACTACATCGATTTTATTAGGAATCGAGGATCTTT  
TAACAATACCCTCTAAGGGATGGTTAGTCCAAGATGCGGAACAACAGAGTTTTCTTTTGGAAAAACACTATTATTATGGG  
GCTGTACACGCGGTAGAAAAATTACGCCAATCCGTTGAAATCTGGTATGCTACAAGTGAATATTTGAAACACGAAATGAA  
TTCGAATTTTCGGATAACAGATCCTTCTAATCCAGTCTATCTAATGTCTTTTTTTCAGGAGCTAGAGGAAATGCATCGCAGG  
TACACCAATTAGTAGGTATGCGAGGATTAATGGCGGATCCTCAAGGACAAATGATTGATTTACCTATTCAAAGCAATTTA  
CGCGAGGGACTTTCTTTGACAGAATATATAATTTTCTGCTACGGAGCCCGCAAAGGGGTTGTAGATACTGCTGTACGAAC  
GGCGGATGCTGGATATCTTACACGTAGACTTGTGAAAGTAGTTCAACATATTATTGTGCGTAGAAGAGATTGTGGTACTA  
TCCAAGCTATTTCTGTGAGTCTCAA-----AATGGG-----  
-----ATGACGGAAAAACTTTTTGTACAAACA-----

TTAATTGGTCGTGTATTAGCAAACGATATATATATCGGTTACGCGTGCATTGCCACTCGAAATCAAGATATTGGAATTGG  
GTTAGTCAATCGATTATAACCACCTTTTCGAGCACAGCCATTTTCGAGCACAAACCAATATATATTAGAACCCCTTTACTT  
GCCGGAGCACATCTTGGATCTGTCAATTTATGTTATGGTCGGAGTTTCCACT-----  
CATGGCGATCTGGTCGAATTTGGGGGAAGCTGTAGGTGTTATTGCGGGTCAATCTATTGGGGAGCCAGGGACTCAACTAAC  
ATTAAGAACTTTTTCATACTGGTGGGGTATTACAGGGGGTACTGCCGACCTGTACGATCCCCTTCAAATGGAAAAATCC  
AATTCAAT-----

GGGGATTTGGTTACCCACACGTACCCGTCATGGGCAGCCTGCTTTTTCTATGTTATATAGACTTGCATATAACTATTCA  
GAGTCAGGATATTCTACATAGTGTGACTATTCTTTCAAAGGCTTGATTCTAGTGCAAAATGATCAATATGTAGAATCCG  
AACAAGTAATTGCGGAGATTTCGTGCCGGAACGTCCGCTTTGCAT-----  
TTTTAAAGAAAAGGTACAAAAACATATTTATTCCGAATCAGATGGGGAAATGCCTGGAGTACCGATGTT-----  
TATCAT-----

GCGCCCGAATATCAATATGGTAATCTTCGTGCTGATTACCAAAAACAAGCCATTTATGGATATTGTCAGTAAGTATG-----  
-TGCAGATCTAGT-----ATAGCTTCTTTTTTCGCTCCACAAGGATCAAGATCAAATGAATACTTATTCTTT-----  
TCTGTT---GACGGAAGGTATATCTTT-----GGCCTC-----TCGATGGCTGATGATGAG-----  
-----

-----GTAAGACATAGACTGTTG-----GATACT---TTTGGTAAA-----  
-AAAGATAGGGAAATT-----CTT-----GATTAT---TCA---ACGCCG-----GATCGAATCATGTCCAAT-  
-----GGTCATTGGAATTTTGTCTATCCTTCTATTCTTCAAATAAATTTTGT-----  
TTGTTAGCGAAAAAGCGAAGAAATAGGTTCCGCAATTCATTACAG-----TATCATCAAGAA-----  
CAAGAGAAAAGAACCAATA---TCCTGTTTT-----  
GGGATTTTCGATTGAAATACCCTTTTATGGGTGTTTTACGTAGAAATACTATAGTTGCTTATTTTTGACGACCCACGATACAA  
AAAAGATAAAAAGGGTTTCAGGAATTGTTAAATTTAGATATAGGACCTTAGAGGACGAATATAGG-----  
-----

ACTCGAGAGAAAGACTCAGAGAACGAATACGGGAGCCAGAAAACGAATATAGGACCCGAGAG---GAA---  
GAATGTAAAACCCTAGAAGACGAATATAGGACTCGAGAGGAGGAGTATGAA-----  
-----

ACCCTAGAAGATGAATATGGGATCCCAGAGAACGAATATGAAACCCTAGAAGATGAATATGGAATCCTAGAGGACGAATA  
TAGGACTCGAGAGGAGGAATCCGAGGACGAATATGGGAGTCCAGAGAACAAATATAGGCCCCGAGAG-----  
-----

GATAAATATGGCACTTTAGAGGAAGACTCAGAGGACGAACATGGGACTTTAGAGGAAGACTCAGAGGAAGACTCAGAGGA

CGAATATGGGAACCCGGAGGAAGATTCCGTCTTAAAAAAGGGGGTTTTG---  
ATTGAGCATCGAGGAACAAAAGAATTTAGTCTAAAATAC-----  
CAAAAAGAAGTAGATCGGTTTTTTTTTTCATTCTCCAAGAAGTGCATATCTTGCCGAGATCCTCATCC---  
CTAAAGGTACTTGACAATAGTATTATTGGAGTGGATACACAACCTCACAAAAAATACA-----  
AGAAGTCGGCTGGGTGGATTGGTTTCGAGTGAAGAGAAAAAAGCCATACG---  
GAACTAAAAATCTTTTCTGGAGATATTCATTTTTCTGAAGAGGCGGATAAG-----ATATTA-----  
GGTGGCAGTTTGATA-----CCACTAGAAAGAGAAAAAAA---GAT-----TCGAAGGAATCA-----  
AAAAAAGG-----GAAAATTGGGTCTATGTTTCAGTGGAAAAAATTCTCAAGAGCAAG-----

Panax ACCTGTTCTTCTCCTGAGTTGAGACCGATCATTAGATAGATGGGGGTAAACTAATGAGCTCA--

GATATTAATGAACTCTATAGAAGAGTTATCTATCGAAACAATACTTTACCGACCTATTAACAACAAGTAGATCAACGCC  
AGGAGAATTAGTAATGTGTGTCAGGAGAAATTGGTACAAGAAGCCGTGGATACACTTCTTGATAATGGAATCCGCGGACAAC  
CGATGAGGGACGGTCATAATAAAGTTTACAAGTCATTTTTAGATGTAATTGAAGGCAAAGAGGGGAAGATTTCTGTGAGACT  
CTGCTTGGCAAACGGGTCGATTATTCAGGGCGTTCCGTCATTGTGCTGGGTCCGTCACCTTTCATTACATCGATGTGGATT  
GCCCCGCGAAATAGCAATAGAGCTTTTCCAGACATTTGTAATTCGTGGTCTAATTAGACAACATCTTGCTTCGAACATAG  
GAGTTGCTAAGAGTAAAATTCGGGAAAAAGAACCGATTGTATGGGAAATACTTCAGGAAGTTATGCAGGGGCATCCCGTA  
TTGCTAAATAGAGCGCCGACTCTGCATAGATTAGGCATACAGGCATTCCAGCCTGTTTTAGTGGAAAGGTCGTGCTATTTG  
TTTACATCCATTAGTTCGTAAAGGATTCAATGCAGACTTTGACGGGGATCAAATGGCTGTTTCATGTGCCTTTATCTTTGG  
AGGCTCAAGCAGAAGCACGTTTACTTATGTTTTCTCATATGAACCTTTTGTCTCCAGCTATTGGGGATCCTATTTCCGTA  
CCAACCTCAAGATATGCTTATTGGACTCTATGTCTTAACGAGCGGGAATCGTCCGGGTATTTGTGTAATAGGTATAATCC  
ATGT-----AATCGC-----AGAAAC-----TATCAAAATGAA---AGAATT---TACGAT-----  
-----ATAAC-----

TATAAGTATACGAAAAAAGAAACCCTTTTTTTGTAAATTCCTATGATGCAATTGGAGCTTATCGGCAGAAACGAATCAA  
TTTAGATAGTCCTTTGTGGCTT-----CGGTGG---CGACTA-----GATCAACGCGTTATTTCTGCA-----  
AAAGAAGCCCCCTCGAAGTTCACTATGAATCTTTGGGTACCTATTATGAAATTTATGGGCAATATCTAATAGTAAGAAG  
TATAAAAAAAGAAATCTATATATCTATATTCGAACTACTGTTGGTCATATTTCTCTTTATCGAGAAATCGAAGAAGCTA  
TACAGGGGTTTTGTGTCAGGCCTGTTTCATATGGTCCC-----  
-----ATGGAGGTA-----CTTATGGCAGAA---CGGGCCAATCTGGTCTTT--

CACAATAAAGTGATAGACGGAACCTGCCATGAAACGACTTATTAGTAGATTAATAGAACACTTCGGAATGGCATATACATC  
ACACATCCTGGATCAAGTAAAGACTTTGGGTTTTCAACAAGCTACTGCTACCTCCATTTTCATTAGGAATTGACGATCTTT  
TAACAATCCCTTCTAAGAGATGGCTAGTTCAGATGCTGAACAACAAAGTTAATTTTTGGAAAAGCAACACCATTATGGG  
AATGTACACGCGGTAGAAAAATTACGTCAATCCATTGAGATATGGTATGCTACAAGTGAATTTTTGCGACAAGAAATGAA  
ACCTAATTTTAGGATGACTGACCCCTTTAATCCAGTTCATATAATGTCTTTTTCGGGAGCTAGAGGAAATGCATCTCAGG  
TACATCAATTAGTAGGTATGAGAGGATTAATGGCGGATCCCCAAGGACAAATGATTGATTTACCCATTCAAAGCAATTTA  
CGCGAAGGACTCTCTTTAACAGAATATATTTTCTTGCTACGGAGCCCGTAAAGGGGTTGTGGATACTGCTGTACGAAC  
CTCAGATGCTGGATATCTCAGCGCAGACTTGTGTAAGTAGTTC AACACATTGTTGTACGTCGAAAAGATTGTGGCACCG  
TCCGAGGTATTTCTGTGAGTCCCCGA-----AATGGG-----  
-----ATGATGCCGGAAGGGTTTTTATCCAAACA-----

TTAATTGGTCGTGTATTAGCGGATGATATATATCTGGGTCCACGATGTATTGCCACCAGAAATCAAGATATTGGTAGTGG  
ACTTGTCAATCGATTCAATCC-----  
TTTCGAGCACAACCAATATATATTCGAACTCCCTTTACTTGTAGGAGTACATCTTGGATCTGTGATTATGTTATGGCCG  
GAGTCCTACT-----  
CACGGCGATCTGGCCGAATTGGGAGAAGCTGTGGGTATTATTGCAGGTCAATCTATTGGAGAACCTGGTACTCAATTAAC  
ATTAAGAACCTTTTCATACCGGCGGAGTATTCACAGGGGTAAGTGCAGAACATGTGCGAGCCCCTTCTAATGGAAAAATA  
AATTCAAT-----

GAGGATTTGGTTCATCCGACACGTACACGTCATGGACATCCTGCTTTTTCTATGTTCTATAGACTTGTATGTAACCTATTGA  
GAGTGAAGATATTATACATAATGTGAATATYCCACCTAAAAGTTTTCTTTTAGTTCAAAATGATCAATATGTAGAATCAG  
AACAAAGTGATTGCTGAGATTTCGCGCAGGAACATCCACTTTGAAT-----  
TTTAAAGAGAAGGTTTCGAAAACATATTTATTCTGACTCAGAGGGAGAAATGCCTGGAATACCGATGTG-----  
TATCAT-----  
GCACCTGCATTTACTTATGGGAATGTTTCATCTCTTACCAAAAACAAGTCATTTATGGATATTATTAGGAGAGCCA-----  
-TGCAGATCCGAT-----CTAGTCGCCCTCTCGATCCACAAGGATCAAGATCAAATGAACGCCCATTTCTCTT-----  
TCTGTC---AAGAGAAGATATATTTCT-----AACCTC-----TCAGTAACTAATGATCAA-----

-----GCGAGACACAAATTCTTTAGTTCGGATTTT---TCTGGTAAA-----  
-AAAGAAGATAGGATT-----ACT-----GATTAT---TCA---GAACTT-----AATCGAATTGGT-----  
-----CATTGTAATCTCCCATATCTGGCCATTCTCCACGCAAATTCTGAT-----  
TTATTGGCAAAGAGACGAAGAAATAGATTTCATCATTCCACTCCAA-----TCGATTCAAGAA-----  
CACGAGAACGAACCTAATG---CCCTCTTCG-----  
GGTATCTCGATTGAAATACCCATACATGGTATTTTCCGTAAAAAGAGTATTATTGCTTATTTTCGATGATCCTCGATACAG  
AAGA-----AAGAGTTCGGGAATT-----

-----ACTAAATATGGTACTATAGAAGTGCATTCA-----

ATCGTCAAAAAAGAGGATTTG---ATTGAGTATCGAGGAGTCAAGGAATTTAGGCCAAAATAC-----  
CAAATGAAAGTGGATCGATTCTTTTTTATTCCCGAGGAAGTGCATATCTTACCCGGATCTTCTTCC---  
ATAATGGTACGGAACAATAGTATTATTGGGGTAGATACACAAATCACTTTAACTACA-----  
AGAAGCCGAGTGGGCGGATTGGTCCGAGTGGAGAGAAAAAAGAAATT---  
GAACTTAAAATATTTTCTGGAGATATCCATTTTCTGGAGAGACGGATAAG-----  
ATATCCCGACATAGTGGCGTCTTGATA-----CCACCAGGAACCGGAAAAACA---AAT-----  
TCCAAGGAATCA-----AAAAAATGG-----AAAAATTGGATCTATGTCCAACGG-----ATCACACCTACCAAG--

Pelargonium ACCGGTTCTTCCCCCGAGTTGAGACCGATATTTAAGATATCTGAGGTTCAATTTATAAGTTTCG--

GATCTTAATACCCTCTATAAAGAAGTTATTAGTAATAACAAAATCTTAGTGACTCATTATTAGGTTGTAAATTTGTGCC  
AGAGCAGTTATTAACGGGTCAAGAGAAAATAGTACAAGTAGCTGTGGATCAACTTCTTGATAATAGAATCAGCGGACAGC  
CACGAAGGGATCGTAATAAGCAGCTTTACAAGTCGTTTTAGATATACTTGCAGGCAAAGAGGGGAGATTTTCGTCAGACT  
CTGCTTGGCAGACGGGTTGATTATTCGGGGCGTTCTGTTCATTGTTGTAGGCCCTCACTAGCATTACATCAATGTGGATT  
ACCTCGTGAAATAGCACTAGAGCTTTTCCAAACATTTATAATTCGCTCTCTAATTAGACAGCGCCTTGCTTCAAGCGTAA  
AAACTGCTAAGAAGCAAATTCGGGAACAAGAAAGAAATTGTATGGGACATACTTGGAGAAAGTTGTGCAGGAGCATCCTGTA  
TTACTGAATAGGGCACCTACTTTGCATAGATTGGGTATACAGGCCTTCCAACCCATTTTAAACGAAAGAGCGCGCTATTTA  
TTTACATCCACTCGTTTTGTAAAGGATTCAATGCAGACTTTGATGGGGATCAAATGGCTGTTTACCTTTATCTTTGG  
AGGCTCAAGCGGAAGCTTATTTACTTATGTTTTCTACTCAGAATCTCTTGTCTCCGGGTAATGGAGATCCCATTTGCGTA  
CCAACCCAAGATATGCTAACTGGGCTCTATACCTTAAACCCTTGGGAATCGTCGAGGTATTTGTGCAACTAGGTATAATTT  
GTGG-----AATCGC-----AGAAAC-----TCTCAAAATGAA---AGAATT---GACGAT-----  
-----AAGCAC-----

TATGGGTCTACCAAAGGAAAAGAACTCCTTTTTTGTAAATCCCGATGATGCAATTGGAGCTTATCGACAGAAAAGAAATCAA  
TTTAGATAGCCCTTTTTGGCTTAAGGTTACGTGG---GGA-----CAACACCGTATTGTTTCA-----  
AAAGAACTTCTGTGCAAGTTCATTATGAATCTTTGGGTACCCATCATGAGATTTATGGACTGTAAAATAGTAAGAAG  
TGTAAAAACAGAAAGGCATTTTATATACATTCGAACTACTGTTGGTCATCTTTTTCTTGATCGAGAAATCGAAGATGCTC  
TAAAAGATTTT---AGGGCTCGGGTTGTCTAG-----ATGAAAGAATGGCCGCCCAATCTGGCCTTT--

CACAATAAAGTAATAGACGGGGCTGCTATTAACAACCTTATTAGTCGATTAATACAGCGCTTCGGAATGTTATATACATC  
CCACGTCCCTAGATCAAGTAAAGCTTCTGGGTTTTCAAGCAAGCCACGGCTTCATCCATTTTATTAGGAATTGATGATCTTT  
TAACGATACCGTCTAAGAGATGGCTAGTCCAGGATGCTCAACAACAAAGTTTTCTTTTGGAAAAATACTATCAGTATGGG  
AATGTACACGCAGTAGAAAAATTACGCCAATCCATCGAGATCTGGGATGCTATAAGTGCATATTTGCGACAAGAAATGAC  
TCCCAATTTTGGAAATGACTGACCCCTTAAATCCAGTCCATATAATGTCTTTTTTCGGGAGCTAGAGGAAATGCATCTCAAG  
TAAACCAATTAATAGGTATGAGAGGGCTGATGTCGGATCCACTAGGACAAATGATTGATTTACCTATTCAAAGCAATTTA  
CGTGAAGGGCTCTCATTAAACAGAATATATCATTTCTAGCTATGGCGCCCGCAAAGGGGTTGTGGATACTGCTATACGAAC  
AGCAGATGCTGGGTATCTTACCCGCAGACTTGTGACGTAGTTCAACATATTATTGTACGTGGAACAGATTGTGGTACCA  
CCCAGGGCTTTCTCTAAGTCTCTCAA-----AATGGG-----  
-----GGGGTGCCAGAAAGTACT-----CAAACA-----

TTAATCGGTCGTGATTAGCAAAGGATATTTATATCGGTCCCGATGCATTGCGGTTCGAAATCAAGATCTTGGGGGTGG

CCTTGTCAATCGACTCATAACC-----  
TTCAAAAAAAGCCAATATATGTTAGAACTCCCTTTACTTGTAGGAGTACGTCTTGGATCTGTCGATTCTGTTATGGTCCG  
AAGTCCTACTAGCGCTTTCGGGTGACTTGGTTCGAATTAGGGGAAGCTGTAGGTATTATTGCGGGTCAATCCATTGGAGAAC  
CGGGGACTCAACTAACATTAAGAACCTTTTCATACCGGTGGAGTATTACAGGAGGTACTGCAGAACAAGTACGAGCCCCT  
TTCAACGGAAAAATCAAATTCAT-----  
GAGGACTTGGTTCATCCACACCGGACACGCCATGGGCAACCCGCTTTTCTATGTTATATAGATTTGTATTTAACTATTGA  
GAGTGAAGATATTATACATAGCGTGCCTATTCCACCAAAGAGTTTTCTTTTAGTTCAAATGATCAATATGTAGAATCAG  
ACAAGTCATTGCCGAGATTAGCGCGGGAACATCCACTTTTGCT-----  
TTTAAAGATAGAGTTCGAAAACATATTTATTCTGACTCATCGGGAGAAATGCACTCGAATACCGGCATG-----  
TACCAT-----  
GCACGCAAATTTCTTTTAGTAATGTTTCATATCTTACCAAAAAACAAGCCATTTATGGATCTTATTAGGGGATTTA-----  
-TGCGGATCCGGT-----CCAGTCTTTTTTCGATGTACAAGGATCAAGATCAAATGAGCATTCACTCTCT-----  
TCTGTC---CAAGGCAGAAATACGCCT-----AGCCTT-----TCCGTGAATAATGATCAA-----  
-----  
-----TTGAAACACAGACGTTTGAGTCTTTATGAC-----  
AAAAATGGGACAGGGGGGGTAGTATACCGATTCTT-----AATTAT---TCA---GAAATG-----  
ACTCGAAGTCTATCGACT-----GCCCGTTGCAATCTCCTATATCCTGCTATTCTCCACGAGAATTTTTCT-----  
TTATTGGCCAAGAAGCGAAGAACGAGATTTCTCATTCCATTCCAA-----  
TCCATTCAAGAACATCGACGAAAAACGAACGAATA---CTCTGTTCT-----  
GACATCTCGATTAAAATACCCAGAAATGGTCTTTTCCGTGGAATAGCATTCTTGCTTATTTTCGATGATCCTCGATACAA  
AATA-----GGGGTTTTCGGGAATT-----  
-----  
-----ACGAAATATGGTACTATAGAGGTGGATTCA-----  
-----  
ATCGTCCAAAAGAGTCTTTC---ATCAACTATGGAGGAGTC-----CAGCCAAAAGAC-----  
GAAGGGAAGGTAGATCCGCTTTTTTTCATTCCCGAAGAAGTGCATATTTTCCCGAAACCTCTTCC---  
ATAATGGTACGGAACAATAGTATCATTGGAATAAATACAAAAATTACTTTAAATAAA-----  
AGAAGCCGAGTCGGCGGATTGGTACGAGTGAAGAAAATACACCGTGGGATT---  
AAACTTCAAATATTTTCTGGAGATATCTCTTTTCCGAGGAAGAGAGATAAGAGATTTATACCCCAAAAACAAGGACATCTT  
GATA-----CCACCACAAATAAGAAAAAGA---AAT-----TTTAATAAATCC-----AAAAAGCG-----  
--AAAAATTGGATCTATGTCCAAAA---ATGAGACCTACCAAT-----  
-----  
Phalaenopsis ACCAGTCTTCTCCTGAGTTGAGACCAATCATTAGATAGATGGGGGTAACTAATGAGTTCG--  
-  
GATATTAATGAACTCTATAGAAGAGTTATCTATCGGAACAATACTCTTACCGATCTATTAGCAACAAGTAGATCTACACC  
AGGGGAATTAGTAATGTGTGTCAGGAGAAATTGGTACAAGAGGCCGTGGATACACTTTTTGATAATGGGATCCGCGGACAAC  
CCATGAGAGATGGTCATAATAAAGTTTACAAGTCATTTTCCGATGTAATTGAAGGCAAAGAAGGAAGATTTTCGTGAGACT  
CTGCTTGGTAAACGGGTCGATTATTCGGGACGTTCTGTCAATTGTGCTAGGTCTTTGCTTTTATTACATCAATGTGGATT  
ACCTCGAGAAATAGCAATAGAGCTCTTCCAAGCATTGTGAATTCGTGGTCTAATAAGACAAGATGTTGCTTCTAACACAG  
GTATTGCTAAAAGTAAAATTCGGGAAAAAGAACCCATTGTATGGGAAATCCTTCAAGAAGTGTGCAGGGGCATCCTGTA  
TTGTTGAATAGAGCGCCACCCTGCATAGATTAGGTATACAGGCGTTTCAACCCATTTTAGTGGAGGGGCGTGCTATTTG  
TTTACATCCCTTAGTTTGTAAAGGGCTTCAACGCAGACTTTGATGGGGATCAAATGGCTGTTTACGTACCATTATCTTTGG  
AAGCTCAAGCAGAAGCTCGTTTACTTATGTTTTCTCATATGAATCTCTTGTCTCCAGCTATTGGGGATCCCGTTTTCCGTA  
CCAATCAAGATATGCTTATAGGACTCTATGTATTAACGATCGGTAATCCCGAGGTATTTGTGCAAATAGGTATAATCA  
ATCTAATTCTAATTGC-----AGAAAC-----TATAAAAAGGAA---AAAGTT---TACAAG-----  
-----AATGAC-----TTTAAGTATACAAAA-----  
GAGCTTTATTTTTCTAGTCTTATGATGCACTTGGAGCTTATCGGCAGAAACGAATCCATTTAGATAGTCTTTTGTGGCT  
T-----CGGTGG---AGACTA-----GATCAACGCGTCGTTGGCTCA-----  
AGAGAAGTTCCCATCGAAATTCATATGAATCTTTTGGTAATTATAATGAGATTTATAAGCACTATCAAATAATAGGAAG  
TGTAATAATAGAAATTTGTTGTATATACATTCGAACTACTGCTGGTCATATTTCTTTTTATCGAGAAATAGAAGAAGCCA  
TACAGGGTTTTGGCGGGCCTACTCA-----

-----ATGGAGGTC-----CTTATGGCAGAA---CGGACCAATCTGGTCTTT--  
-----  
CACAAATAAGGTGATAGATGGAAGTCTATTAACGACTTATTAGCAGATTAATAGATCATTTCGGAATGGCATATACGTC  
ACATATCCTGGATCAAGTGAAGGCTTTGGGTTTACGGCGAGCCACTGCTACATCTATTTTCATTAGGAATTGATGATCTTT  
TAACAATACCTTCTAAGAGATGGTTAGTTCGAAGACGCTGAACAACAAAGTTTTCTTTTAGAGAAAAACCATCATTATGGG  
AATGTACATGTGGTAGAAAAATTACGTCAATCCATTGAGGTATGGTATGCTACAAGTGAATATTTGAGACAAGAAATGAA  
TCCTAATTTTCAGATGACTGATCCCTCTAATCCAGTTCATCTAATGTCCTTTTCGGGGGCTAGAGGAAATGCATCTCAAG  
TACATCAATTAGTAGGTATGAGAGGATTAATGTCTGGATCCTCAAGGACAAATGATTGATTTACCGATTCAAAGCAATTTA  
CGGGAAGGGCTTTCTGTGACAGAATATATAATTTCTTGCTACGGAGCCCAGAAAGGAGTTGTAGATACTGCTGTACGAAC  
ATCAGATGCTGGATACCTCACGCGTAGACTTGTGGAAGTAGTTC AACATATTCTTGTACGTAGAACAGATTGTGGTACTA  
TCCGAGGTATTTCCGTGAGTCTCAA-----AATGGG-----  
-----ATGACGGAAAAAGATTTTTGTCCAAACA-----  
CTAATTGGTCGTGTATTAGCAGACGATATATATATCGGTCTACGATGCATTGGTACTCGAAATAAAGATATTGGAATTGG  
ACTTGTTAATCGATTCATCACC-----  
TTTCAAGCACACCCAATATATATTAGAACTCCTTTTACTTGCAGGAGTACATCTTGGATCTGTCAATTATGTTATGGCCG  
GAGTCTACT-----  
CATGGTGACCTGGTCGAGTTGGGAGAAGCCGTAGGCATTATTGCGGGTCAATCAATTGGGGAACCGGGGACTCAACTAAC  
ATTAAGAAGCTTTTCATACTGGTGGAGTATTCACGGGTGGTACTGCCGAACATGTACGAGCTCCTTCTAATGGAAAAATAA  
AATTTGAT-----  
GAGGTTTTGGTTCATCCACACGTACCCGTCACGGGCATCCTGCTTTTCTATGTTTTATAGACTTTTATGTAACTATTGA  
GAGTCCGGATATTAGACATAATGTAAATATTC AACAACAAAAGTTTTGATTTTTAGTTCAAAATGATCAATATGTAGAATCAG  
AACAAAGTGATTGCCGAGATTTCGTGCCGAAACGTCCACCTTTTCAT-----  
TTTAAGGAGAGGGTTCAAAAACATATTTATTCTGAGTCAGAAGGAGAAATGCCTGGAGTACTGATGGC-----  
TATCAT-----  
ACGCCCAAATATCCATATAGTAATGTTTCATCTATTACCAAAAACAAGTCATTTATGGATATTAGCAGGAGGTCTA-----  
-TGCAGATCCAATTCCAATATAGTGTCTTTTTCTACTCCACAAGGATCAAGATCAAATGAATGCTAATTCATTT-----  
TCTCTC---AAAGATCTCTTT-----GATCTC-----TCACTGACTAATGATCAA-----  
-----  
-----GTAAGACATAAATTGTTG-----GATACT---TTTGGTAAA-----  
-AAAGATAGGGAAAGT-----CTT-----GACTAT---TCA---AAACCT-----TATCGAATCATATCTAAG-  
-----GGTCATTGGAATCTCATAGAGCCTTCTACTTATATTCGTCAAGAGAAT-----  
TCTTTGGCGAAAAAGCGAAGAAATAGATTTGTGATTCCCTTACAA-----TATGATCAAGAA-----  
CAAGAAAATAAACTAATA---CCCTGTTTT-----  
GGTATTTTCGATTAAAATACCTATAAATGGTATTTTACGTAGAAATAGTATTATTGCTTATTTTTGATGATCCGCGATACAG  
AAGA-----AGCAGTTCAGGAATT-----  
-----  
-----ACTAAATATGGGATTGTCTGAAGTAGATTCA-----  
-----  
ATCGTAAAAAAGAAGATTTG---  
ATTGAGTATCGAGGAGCAAAAGATTTTGTCCGAAATACCAACGCAAATGAAAGTAGATCAATTTTTTTTTCATTCCCGA  
GGAAATACATATCTTACCCGGATCTTCGCCC---  
ATAATGGTCCGGAACAATAGTATCATTGGAGTAGATACACGACTTGTTTTTAAATATAAATACCAGAAGTCGAGTAGGTGG  
ATTAGTCCGAGTGGAGAGAAAAAAGAAAAGTCTA---  
GAACTGAAAATATTTTCTGGAGATATTCATTTTTTATGGAGAGGTGGATAAA-----  
ATATCTAGGCACAGTGGCATTTTGATA-----CCACCAGGAATCGGAAAAAAA---GAT-----  
TCTAAAGGATCA-----AAAAAATTG-----AAAAATTGGATCTATGTCCAACGC-----ATTACACCTACCAAA---  
-----  
-----

Pinus

ACCAGTTCTTCCCTCCCGAACCGAGGCCAATCGTTCAATTAGGTGAAGGTGGACTTATTACCTCGTCAGATCTAAATGAAC  
TTTATCGAAGAGTTATCAATCGGAATAATACTCTTACAAATTTATTAGCAAGAAGTGA-----

TCTGAGTCATTTGTTATTTTATCAAACAAAATTGATCCAGGAAGCCGTAGATGCACTTCTCGATAATGGTATCTGCAGACA  
ACCAATGAGAGACAGTCATAATAGGCCTTATAAATCGTTCTCAGATGTGATCGAAGGCAAAGAGGGGAAGATTTTCGTGAAA  
ATTTACTAGGCAAACGAGTTGATTATTCAGGTCGTTCCGTTATTGTGGTGGGTCCCTTTCTATCATTGTACCAATGTGGA  
TTACCCTCAGAAATAGCAATAGAGCTTTTTCAAGCATTTTTAATTTCGTAGTCTCATCGGACGACATATTGCTCCCAACCT  
AAGAAGTCTAAAAGTATGATTTCGAGATAAGGGACCCATTGTATGGGAAGTACTTCAAGAGGTTATGCAAGGACATCCCA  
TATTGTTGAATCGAGCACCTACCTTACACAAATTGGGAATACAAGCGTTTCAACCTATTTTTAGTAGAAGGACGTGCCATT  
CGTTTACATCCATCGGTTTGTGGGGGATTTAATGCAGACTTCGACGGAGATCAGATGGCTGTCCATGTACCTTTATCTCT  
GGAAGCTAGAGCAGAAGCTCGTTTACTCATGTTTTCTGAGACAAATCTTTTGTCTCCAGCTATCGGGGATCCTATTTCTA  
TACCGACTCAGGATATGCTTCTTGGACTTTATATATCAACGGTCCAAAATAGTCAAGGTATTTATGGGAATAGGTACCAT  
CCGTAT-----CACTCG-----GAAAATAAA---AGCTTT-----  
-----TCTTGTAA-----  
AAACCTTCCTTTTATAGTTATGATGATGTGCTCAGAGCTTACCACAGAAAACGAATTGACTTATACAGCCCCTTATGGCT  
C-----CGGTGGGGGAAGTG-----  
GATTTACGTATCATTACCTCAGTAAACCAAGAAGCCCCTATCGAAGTTCAATACGAATCTTTGGGTACTTTCCACGAAAT  
CCATGAACATTATCGAATAAGAAAAGGTAGAATGGGAGAAATCCTTAATATATACATTGCAACAACCTGTTGGTCGTACTC  
GTTTCAATCGAGAAATGGAAGAAGCCATACAAGGGTTT-----GCCTGTTCT---  
GAACACCCAAATAAATCACTACCAGCTCTCAGGATC-----  
ATGAAAATATGGAGATTTTTTTC--CTTATGAAGGAA---  
CGAACTAGATTGCCCTTTGATAATTTGCCCTTTTATAATAAAGTGATGGATAAAAAGTCCATTAAAAAGCTTATTAGCAG  
ATTAATAGATCACTTCGGAATGACATATACATCACATATCTTGGATCAACTCAAGACTTCGGGTTTTCAACAAGCTACTG  
ATACAGCTATTTTATTAGGAATTGATGATCTTTTAAACAGCGCCTTCCAAAGGATGGCTCGTCCAAGATGCGGAGCAACAA  
GGTTCTGTTTCGGAGAAACAGAATCATTATGGGAATGTACACGCAGTGGAAAAATTACGTCAATCGATTGAGATATGGTA  
TGCTACCAGTGAATATTTGAGAAAAGAAATGAATCCGAATTTTAGCATGACTGATCCCTTAAATCCAGTACATGTGATGT  
CCTTCTCAGGAGCTAGGGGAAGTACATCTCAGGTTACCAATTAGTAGGTATGAGAGGATTAATGTGAGATCCTCAAGGA  
CAAATCATCGATCTACCCATTTCGACGGAATTTACGCGAAGGGCTCTCTTTAACGGAATATATTATTTCTGTTATGGGGC  
TCGTAAAGGAGTTGTGGATACTGCTGTACGAACAGCAGATGCTGGATACTCACACGTAGACTCGTTGAAGTAGTTCAAC  
ACATTGTAGTACGTAGAACAGATTGTGGCACTATCCAAGGTATTTTCGTAAGTCCCATT-----  
CGAGGTCGAGAGAGGGACAGAAATGAA-----  
ATTGTTGTACGAACACAAAATA---  
CTGATTGGCCGTGTGCTAGCAGACGATGTATATATAAATAGGAGATGCATTGCCACGCGCAATCAGGATATTGGAGTTGG  
ACTTGCCAATCAATTAATAAAC-----  
CTTCGAACACAACCAATATATATACGAACCCCTTTACTTGAAGAGTATATCTCGGATTTGTCAATTATGTTATGGTCG  
GAGTACTACT-----  
CACAGTCACTTGATTGAATTAGGAGAAGCAGTAGGTATTATTGCGGGCCAATCCATTGGAGAACCAGGAAGTCAACTAAC  
ACTAAGGACTTTTCATACCGGGGGGGTATTTACTGGTATATTGCAGAACATATACGAGCCCCTTTCAATGGAAAGATTG  
AATTCAAT-----  
GAAAATTTGGTTTTATCCACACGTACACGTAATGGACATCCTGCTTATCTATGTCATAATAACTTATCCATTACTATTGA  
TGGTCAGGATCAAGTACAGAACTTAACCATTCCACCACAAAGTTTGTCTTTGGTTTCAAGATGATCAATATGTGGAATCGG  
AACAGCTTATTGCCGAGGTTTCGTGCTAGAACATCTTCC-----  
TTCAAGGAAAAAGTTCGAAAAATATATATTCTGACTTAGAAGGAGAAATGCACTGGAGTACCAATGTG-----  
TGTCAT-----  
GCACCTGAATATGTACAGGGTAATGTTTCATCCTATACTCAGGACGGGTTATCTATGGATATTATCGGGAGGTATA-----  
-TACGGATCCCGT-----GTAGTACCCTTTCCATTTATAAGTATCAGGATCAAGTATATGTTCAACCTTTT-----  
GTTGCC--AAACATCAATCACTTTCC-----GATTCT-----TACGTGGAT-----CAA-----  
-----  
-----GTGGAACATAGATCAGGTGACTCAAATTGC---TATGAGAAG-----  
----GAAGAACAAATC-----TTC-----AGTTAT---TCA---GAAACTGAAACTGATCGGACCATATCCAAC-  
----AAGCATCGAGACTCTATTTAT---GTCTTTTACCCTAATAATTACAAT-----  
ATTAAGGGGAAAAAGCAAATGAATCGATTATCGTCTCATTGCAG-----TGTGATAAAGAA-----  
TGGGAAAAAATAATA---CCTTGTCT-----  
GATGCGATTCTTAGAATACCCAAAAGTGGTATTCTACAGAGAAATTCATTTTTGGATATTCTAAC-----  
-----  
-----  
-----  
-----

Piper ACCAGTTCTTCTCCCGAGTTGAGACCAATCATT CAGATAGATGGGGGTAAGCCAATGAGTTCG--  
-  
GATATTAATGAACCTCTATCGAAGAGTTATTTATCGGAACAATACTCTTACTGATCTATTAACAACAAGTAGATCCACGCC  
AGGAGAATTAGTAATGTGTCAAGAGAAGTTGGTACAAGAAGCCGTGGATACACTTCTTGATAATGGTATTCGCGGGCAAC  
CGATGAGGGATGGTTATAATAAAGTTTACAAGTCGTTTTTCAGATGTAATTGAAGGGAAAGAAGGAAGATTTTCGTGAGACT  
CTGCTTGGTAAGCGAGTTGATTATTCGGGGCGTTCCGTCATTGTTCGTGGGCCCTCGCTTTTCATTACATCGATGTGGATT  
GCCTCGAGAAATAGCAATAGAACTTTTTCCAGACATTTTTAATTCGAGGTCTAATAAGGCAGCGCGTTGCTTCCAACATAG  
GGATTGCTAAAAGTAAAATTCGAGAAAAAGAGCCCATTGTATGGGAAATACTTCAAGAAATTATGCGGGGCCATCCCCTA  
TTGCTAAATCGAGCACCCACCCTCCATAGATTAGGTATAACAAGCGTTCCAACCCATTTTAGTAGAGGGGGCGTGCTATTTG  
TTTACATCCATTAGTTTGTAAGGGATTCAATGCAGACTTTGATGGGGATCAAATGGCTGTTTCATGTACCTTTATCTTTGG  
AAGCGCAAGCGGAGGCTCGTTTACTTATGTTTTCTCATATGAATCTCCTGTCTCCAGCTATAGGGAGTCCTATTTCCGTA  
CCAACCTCAAGATATGCTTATTGGACTCTATGTATTAACGATCGGAAATCGTCAAGGTGTTTGTGCAAATAGATATAATCC  
ATGG-----AATCGC-----AGGAAC-----TATCAAAACGAA---ACAGTT---  
GACCATACTAAATATGACCGTACTAAC-----  
TATCGGTATACAAAAGAAAAAGAACCCTATTTTTGTAGTTTCTATGACGCCTTGGCGCTTATCGGCAGAAACGAATCCA  
TTTAGATACTCCTTTGTGGCTC-----CGGTGG---CGACTA-----GATCAACGTATCATTTCCTTA-----  
AGAGAAGTTCCAATCGAAGTTCAATATGAATCCTTGGGTACCTATCATGAAATTTATAGGCCCTATTTAATAGTAAAAAG  
TGTCAAAAAAGAAATCCTTTGTATATACATTGCAACCCTGTTGGCCATATTTCTTTCTATCGAGAAATAGAAGAAGCCA  
TACAGGGATTTTGTGGGCTTACTCATACGACGGTACC-----  
-----ACGGAGGTA-----CTTATGGCGGAACAACGGGCAGATCTGGTCTTT--  
-----  
CACAATAAAGCGATAGATGGAAGTCCATGAAACGACTTATTAGCAGATTAATAGATCACTTCCGGAATGGCATATACATC  
ACATATACTGGATCAAGTAAAGACTCTGGGTTTTCCAACAAGCCACCGCTACATCCATTTTCATTAGGAATTGATGATCTTT  
TAACAATACCCTCTAAGGGATGGCTAGTCCGAGATGCTGAACAACAAGGTTTGATTTTGGAAAAACACCATCATTATGGG  
AATGTACACGCTGTAGAAAAATTACGTCAATCTATTGAGATATGGTATGCTACAAGTGAATATTTGAGACAAGAAATGCA  
TACTAATTTTGAATGACTGATCCTTCTAATCCAGTCCATATAATGTCTTTTTTTCAGGAGCTAGGGGAAATGCATCTCAGG  
TGCATCAATTAGTAGGTATGAGAGGGTTAATGTCCGATCCCCAAGGACAGATGATTGATTTACCCATTCAAAGTAATTTA  
CGCGAAGGACTCTCTTTAACAGAATATATTTTCTGCTACGGAGCTCGCAAGGGAGTTGTGGATACTGCTGTACGAAC  
ATCCGACGCTGGATACCTCACACGTAGACTTGTGGAAGTAGTTCAACACATTGTTGTACGTAGAACAGATTGTGGCACTA  
TCCGAGGTATTTCCGGCGAGTCCCGA-----AATAGT-----  
-----ATGGAAGAAAAAATTTGGATTCAAAGA-----  
CTAATTGGTCATGTATTAGCATATGACATATATATCGGTCCACGGTGCATTGCTGCCCGAAACCAGGATATTGGGATTGG  
ACTTGTCAATCGCTTCATAACC-----  
TTTCAAGCGAAATCTATATATATTGCAACTCCTTTTATTTGTAGGAGCACTTCTTGGATCTGTGATTATGTTATGGTGC  
GAGTCCCACT-----  
CATGGCGATCTAGTTGAGTTGGGGGAAGCAGTGGGTGTCATTGCGGGTCAATCAATTGGAGAACCAGGCACTCAACTAAC  
ATTAAGAACGTTTCATACCGGTGGAGTGTTTACAGGCGGTACTGCAGAATATGTACGAGCCCTTCGAATGGAAAAATTA  
AATTTTCA-----  
GAAGATTTGGTTCATCCACACGTACACGGCACGGGCATCCCGCCTTTCTATGTTATATAGACCTTTATGTAACCTATTGA  
AAGTCGGGATATTCTACATAAAGTCAATATTTCCCCAAAAAGCTTTATTTTAGTTCAAAAACAATCAATATGTAGAATCAG  
AACAAGTGATTGCTGAGATTTCGTGCTGGAACATCCGCTTTAAGT-----  
TTTAAAGAAAAAGTTCGAAAACATATTTTATTCTGATTGAGAGGGAGAAATGCCTGGAGTACCAATGTA-----  
TACCAT-----  
ACCCCCAATACACGTATGGTAATGTTTCATCTATTACCAAAAACAAGCCATTTATGGATATTATCAGGAAATCCG-----  
-TGCAATCTAAT-----  
GGAGCACTCTTTTCTCTACACAAAGATCAAGATCAAATGAATCTTTATTCTCTTTCTTTCTTTA---



GAACAAAGATCCATTTCT-----GACTTC-----TCAGTGACTAATGATCGA-----

-----GTGAGACGTAAATCGTTTAGTTTGGATCCT---TCCAGGGAG---  
GGGAGGGGGGGGAGGTTT-----TTT-----GATTAT---TCA---GTACCT-----  
GACAAAAGCATACCCAAC-----GACTGTTGGAATTTTATATATTCTGCCATTCTCCACGAGAATTCGTAT-----  
TTCTTGGCGAAGAGGGCGAAGAAATAGATTTCATCATTCCATTCCAA-----TATTCGCAAGAA-----  
GGGGAGAAAGAACCAATG---CCTTGTTCT-----  
GGTATCTCCATTGAAATACCCAAAACCTGGTATTTTACGTAGAAAATACGATTCTTGCTTACTTCGACGATCCCCGATACAG  
AAGA-----AGCGGCTCGGGAATT-----

-----ACTAAATATGGGACCGTAGAGGTGGATTCT-----

CTTGTAATAAAGAGGATTTG---GTTGAATATCGAGGAGAAAAAGAATTGAGGACGAAATAC-----  
CAAACAAAAGTAGATCGATTTTTTTTTTTCATTCCCAGGAAGTGCATATCTTACCTGGGTCTTCGTCC---  
ATAATGGTACGGAACAATAGTATCATTGGAGTCGATACAGAGATCGCTTTAAATACA-----  
AGAAGTCGGGTAGGTGGATTAGTCCGAGTGGAGAGAAAAAAGGACT---  
GAACTCAAAATATTTTCTGGAAATATTCATTTTCTGGAGAGACAGATAAA-----  
ATTTCTCGGCATAGCGGAATCTTGCTA-----CCGCCAGGAATGGAAAAA---AAC-----  
TCTAAGGAATCA-----AAAAATGG-----AAAAATTGGATCTATGTCCAACGA-----GTTACACCTATCAAG--

Platanus ACCAGTTCTTCTCCCGAGTTGAGACCGATCATTCAAATAGATGGGGGTAAACTAATGAGTTCG--

GATATTAATGAACTCTATAGAAGAGTTATCTATCGGAACAATACTCTTACCATCTATTAACAACAAGTAGATCTACGCC  
AGGGGAATCAGTAATGTGTGTCAGGAGAAATTGGTACAAGAAGCCGTGGATACACTTCTTGATAATGGGATCCGTGGACAAC  
CAATGAGGGACGGTCATAATAAAGTTTACAAATCGTTTTTCAGATGTAATTGAAGGCAAAGAGGGGAAGATTTTCGCGAGACT  
CTGCTTGGTAAACGGGTCGATTATTCGGGGCGTTCCGTCATTGTGCTGGGCCCTTCTCTTTTATTACATCGATGCGGATT  
GCCTCGTGAAATAGCAATAGAGCTTTTCCAGACATTTGTAATTCGTGGTCTAATCAGACAACATCTTGCTTCCAACATAG  
GAGTTGCTAAAAGTAAAATTCGGGAAAGAGAACCAATTGTATGGGAAATACTTCAAAAAGTTATAACAAGGGCATCCTGTA  
TTGCTGAATAGAGCACCCACTCTGCATAGATTAGGCATACAGGCATTCCAACCCATTTTAGTGAAGGATGTGCTATTTG  
TTTACATCCATTAGTTTCGTAAGGGATTCAATGCAGACTTTGATGGGGATCAAATGGCTGTTTCATGTACCTTTATCTTTGG  
AGGCTCAAGCGGAGGCTCGTTTACTTATGTTTTCTCATATGAATCTCTTGTCTCCAGCTATTGGAGATCCCATTTCCGTA  
CCAACCTCAAGATATGCTTATGGGACTCTATGTATTAACGATCGGGAATCGTCGAGGTATTTGTGCAAATAGGTATAATCC  
ACGT-----AATCGC-----AGAAAC-----TATCAAATGAA---AGAATT---GACGAT-----  
-----AATAAC-----

TATAGGTATACGAAAGAAAAAGAACCCCTATTTTTGTAGTTCTTATGATGCGCTTGGGGCTTATCGGCAGAAACGAATCAA  
TTAGATAGTCCTTTGTGGCTC-----CGATGG---CGACTA-----GATCAACGCGTCATTGCATCA-----  
AGAGAAGTTCCCATCGAAGTTCAATATGAATCTTTGGGTACCTATCATGAGATTTATGGGCACTATCTAATAGTAAGAAG  
TGTAATAAAGAAATCCTTTGTATATACATTCGAACCACTGTTGGTCATATTTCTTTTTATCGAGAAATAGAAGAAGCCA  
TACAAGGTTTTGCCGGGCTGCTCATATGGTACCTAA-----  
-----ATGGAGGTA-----CTTATGGCAGAA---CGGGCCGATCTGGTCTTT--

CACAATAAAGCGATAGATGGAAGTCCATGAAACGACTTATTAGCAGATTAATAGACCATTTTCGGAATGGCATATACATC  
ACACATCCTGGATCAAGTAAAGACTCTGGGTTTTCCAGCAAGCCACTGCTACATCCATTTTATTAGGAATTGATGATCTTT  
TAACAATACCTTCTAAGGGGTGGCTAGTTCAAGATGCTGAACAACAAGTTTGGATTTTGGAAAAACACCATCATTATGGG  
AATGTACACGCGGTAGAAAAATTACGTCAATCCATTGAGATATGGTATGCTACAAGTGAATATTTGCGACAAGAAATGAA  
TCCTAATTTTAGGATGACCAACCCTTCTAATCCAGTCCATATAATGTCTTTTTTCGGGAGCTAGAGGAAATGCATCTCAGG  
TACACCAATTAGTAGGGATGAGAGGATTAATGTCGGATCCCCAAGGACAAATGATTGATTTACCCATTTCAGAGCAATTTA  
CGCGAAGGACTCTCTTTAACAGAATATATCATTTTCTGTTACGGAGCCCAGAAAGGGGTTGTGGATACTGCTGTACGAAC  
ATCAGATGCTGGATACCTCACGCGCAGACTTGTGTAAGTAGTTCAACACATTGTTGTCCGTAGAACAGATTGTGGCACCC  
TCCAGGGTATTTCTGTGAGTCTCGA-----AATGGG-----

-----ATGATAACGGAAAGAATTTTGATCCAAACA-----  
TTAATCGGTCGTGTATTAGCAGACGATATATATATGGGCCACGATGCATTGCCGCTCGAAATCAAGATATTGGGATTGG  
ACTTGTCAATCGATTATAACC-----  
TTTGGAGCACAACCAATATCTATTTCGAACCCCTTTACTTGCAGGAGTATATCTTGGATCTGTGCGATTATGTTATGGTTCG  
GAGTCCCACT-----  
CATGGCGACCTGGTTCGAATTGGGAGAAGCAGTAGGTATTATTGCGGGTCAATCTATTGGGGAACCCGGGACTCAACTAAC  
ATTAAGAACTTTTCATACCGGCGGAGTATTACAGGAGGTACTGCAGAACATGTACGAGCTCCTTCTAATGGAAAAATCA  
AATTCAAT-----  
GAGGATTTGGTTCATCCACACGTACACGTACATGGACATCCCGCTTTTCTATGTTATATAGACCTGTATGTAACCTATTGA  
GAGTCAGGATATTATACATAACGTGAATATTCACCAAAAAAGTTTTCTTTTAGTTCAAAATGATCAATATGTAGAATCAG  
AACAAGTCATTGCTGAGATTTCGCGCGGGGACATCCACTTTGAAT-----  
TTTAAAGAGAGGGTTCGAAAACATATTTATTCTGACTCAGAGGGAGAAATGCACTGGAGTACCAATGTG-----  
TACCAT-----  
GCGCCTGAATATACATATAGTCATGTTTCATCTCTTACCAAAAAACAAGTCATTTATGGATATTATCAGGAGGTTTCG-----  
-TACAGATCCAGT-----ATAGTCCCTCTTTTCGCTCCACAAGGATCAAGATCAAATGAACGTTTCTTCTCTT-----  
TCTGTC---GAACGAAGATATATTTCT-----AACTTC-----TCAGTGACTAATGATCAA-----  
-----  
-----GTGAGACACAAATTGTTTAATTCGTACCCT---TCCAGTAAA-----  
-AAGGGGAGAGGATT-----CTT-----GATTAT---TCA---GGAACG-----GATCGAATCATATGCAAT-  
-----GGTCATTGTAATTTTCATATATCCTTCCATTCTCCACGAAAATTCTGAT-----  
TTATTGGCAAAGAGACGAAGAAATAGATTTCATCATTCCATTCCAA-----TCTAATCAAGAA-----  
CGAGAGAAAGAACTAATG---TCCCCTTCG-----  
GATATCTCGATTGAAATACCCATAAATGGTATTTTTTCGTAGAAATAGTATTCTTGCATTTTCGACGATCCCCGATACAG  
AAGA-----AATAATTCGGGAATT-----  
-----  
-----ACTAAATATGGGACTATAGAGGTGCATGCA-----  
-----  
ATCGTCAAAAAAGAGGATTTG---ATTGAGTATCGAAGAGCAAAAGAATTTAGGCCAAAATAC-----  
CAAATGAAAGTAGATCGGTTTTTTTTTTCATTCCCAGGAAAGTGCATATCTTACCCGGATCCTCTTCC---  
ATAATGGTACGGAACAATAGTATCATTGGAGTAGATACACGAATCACTTTAAATGCA-----  
AGAAGCCGAGTAGGCGGATTGGTCCGAGTGGAGAGAAAAAAAAAACGGATT---  
GAACTGAAAATATTTTCTGGGGATATCCATTTTCTGGAGAAACAGATAAG-----  
ATATCCCAGCACAGTGGTATCTTGATA-----CCACCAGGAACGGGAAAAAAA---AAT-----  
TCTAAGAAATCAAAA---AAAAAATTG-----CAAATTTGGATCTACGTCCAACGG-----ATTACACCTATCAAG--  
-----  
-----  
Populus ACCAGTTCTTCTCCCGAATTGAGACCCATCATTTCAGATAGATGGAGGTAACTAATGAGTTCA--  
-  
GATATTAATGAACTCTATAGAAGAGTTATTTATCGGAACAATACTCTTACGGATCTATTAACAACAAGTAGATCTACGCC  
AGGGGAATTAGTAATGTGTGAGGAGAAATTGGTACAAGAAGCCGTAGATACACTTCTTGATAATGGAATCCGCGGACAAC  
CAATGAGAGACGGTCATAATAAGGTTTACAAGTCGTTTTTCAGATGTAATTGAAGGCAAAGAGGGAAGGTTTCGTGAGACT  
ATGCTTGGCAAACGGGTTGATTATTCGGGGCGTTCTGTCTATTGTCGTAGGACCCTCACTTTTATTACATCGATGTGGATT  
GCCTCGGAAATAGCAATAGAGCTTTTCCAGACATTTGTAATTCGTGGTCTAATTAGGCAACATCTTGCTTCAAACATAG  
GAGTTGCTAAGAGTAAAATTCGAGAAAAAGAGCCAATTGTATGGGGAATACTTCAGGAGGTTATGCGCGGACATCCTATA  
TTGCTGAATAGAGCGCCTACTCTGCATAGATTAGGCATACAGGCATTCCAACCCATTTTATGGAAGGACGTGCTATTTG  
TTTACATCCATTAGTTTCGTAAGGGATTCAATGCAGATTTTGTATGGGGATCAAATGGCTGTTTCATGTACCTTTATCGTTGG  
AGGCTCAAGCGGAGGCTCGTTTACTTATGTTTTCTCATATGAATCTCTTGTCTCCAGCTATCGGAGATCCCATTTCCGTA  
CCAATCAAGATATGCTTATGGGGCTCTATGTATTAACAAGCGGGAATCGTCGAGGTATTTGCGCAAATAGGTATAATCC  
GTTT-----AATTGC-----AGAAAT-----TTTCAAATGAA---AAAATT---GACGCT-----  
-----AATGCTAATAAGGATAAGTATATAAAA-----  
GAACCCTTTTTTTGTAATTCCTATGATGCAATTGGAGCTTATCGCCAGAAAAGAATCAATTTAGAGAGCCCTTGTGGCT

T-----CGGTGG---CAACTA-----GATCAAGGCCTTATTGCTTCA-----  
AGAGAAGCTCCCATCGAAGGTCACCTTTGGATCTTTAGGTACCTATCATGAGATTTATGGACACTATCTAATAGTAAGAAG  
TATAAAAAAAAAAATTCTTTCTATATACATTCGAACCACTGTTGGTCATATTTATCTTTATCGAGAAATCGAAGAAGCTA  
TACAAGGGTTTTGCCAAGCCTGCTCAGACGGTACC-----  
-----ATGGCCGAA---CGGGCCAATCTCTTCTTT--  
-----  
CACAATAAAGTGATAGATGGAAGTCCATTAAACGAATTATTAGTCGATTCATAGATCACTTCGGAATGGCATATACATC  
ACACATCCTGGATCAAGTAAAGACTCTGGGTTTTCCATCAAGCCACTGCTACATCTATTTTCATTAGGAATTGATGATCTTT  
TAACAATACCTTCGAAAGGATGGCTAGTCCAAGATGCTGAACAACAAAGTTTGATTTTGGAAAAACACCATCATTATGGA  
AATGTACACGCGATAGAAAAATTACGTCAATCCATTGAGATATGGTATGCTACAAGTGAATATTTGCGACAAGAAATGAA  
TCCGAATTTTAGGATGACGGAACCCTTTAATCCAGTCCATATAATGTCCTTTTTCGGGAGCTAGGGGAAATGCATCTCAAG  
TACACCAATTAGTAGGTATGAGAGGATTAATGTCTGGATCCACAAGGACAAATGATTGATTTACCCATTCAAAGCAATCTA  
CGGGAAGGATTGTCTTTAACAGAATATATCATTTCTTGCTATGGAGCCCCGAAAAGGAGTTGTGGATACTGCTGTACGAAC  
ATCAGATGCTGGATATCTTACGCGCAGACTTGTTGAAGTAGTTCAACACATTGTTGTACGTAGAACAGACTGTGGCACCA  
CCCCAGGGATTTCTGTGAGTTCTCGA-----AATGGA-----  
-----ATGATACCGGAAAGAATTTTTATTCAAACA-----  
TTAATAGGTCGTGTATTAGCAGACAATATATATATGGGTCTACGATGCATTGCCACTCGAAATCAAGATATTGGGATTGG  
ACTTGTCAATCGATTTCATCACC-----  
TTTTCGAACACAACCAATATCTATTTCGAACCTCTTTTACTTGTAGAAGTACGTCCTGGATCTGTGCGATTATGTTATGGTCCG  
AAGTCCTACT-----  
CATGGCGACCTGGTGGAAATTGGGAGAAGCTGTAGGTATTATTGCGGGTCAATCCATTGGAGAGCCGGGTACTCAACTAAC  
ATTAAGAACGTTTTCATACCGGCGGAGTATTCACAGGGGGTACTGCCGAACATGTACGAGCCCCCTCTAATGGAAAAATCA  
AATTTAAT-----  
AAGGGTTTGGTTCATCCACACGTACACGTACATGGGCATCCTGCTTTTCTCTGTTCTATGGACTTATATGTAACTATTGA  
GAGTCAAGATATTATACACAACGTGACTATTCCACCAAAAAGTTTTCTTTTAGTTCAAATGATCAATATGTAGAATCAG  
AACAAGTGATTGCTGAAATTCGCTCGGGAACATACACTTTGAAT-----  
TTTACAGAGAGGGTTTCGAAAACATATTTATCCGATTCCAGAAGGAGAAATGCACTGGAGTACTGATGTA-----  
TACCAT-----  
GCATCTGAATTTACATATAGTAATGTCCATCTTTTACCAAAAACAAGCCATTTATGGATATTGTCAGGGGGTTTCG-----  
-TGCAGATCCAGT-----ATAGTCCCCTTTTCACTACACAAGGATCAAGATCAAATAAACGTTTCATTCTCTT-----  
TCTGTC---GAAAGAGGATATATTTCT-----AACCT-----TCAGTAAATAATGATAAA-----  
-----  
-----GTTAAACACAAATTCTTTAGTTCATATCTT---  
TCGAGTAAAAGTAAAAAAAAAAGTAGGATT-----CTT-----GATTAT---TCA---GACCTT-----  
AATCGAATGATATGTACT-----GGTTTC-----ATATATCCTACTATTCTCCACGAGAATTCTGAT-----  
TTATTGGCAAAGAGGCGAAAAAATAGATTTATCATCCATTCCAA-----TCGATTCAAGAA-----  
AAAGAACTAATG---TCCCATTCC-----  
GATATCTTGATTGAAATACCTATAAATGGCATTTCCTGATAGAAATAGTATTTTTGCTTATTTTTGACGATCCCCAATACCG  
AAGA-----AAGAGTTCAGGAATT-----  
-----  
-----ACTAAATATGTGGCTATAGGGGTGCATTCA-----  
-----  
ATTGTCAAAAAGAGGATTTA---GTTGAGTATCGAGGAGTCAAAGAATTTTCAGCCAAAATAC-----  
CAAATGAAAGTAGATCGCTTTTTTTTTTTCATTCCCAGGAAGTGTATATTTTACCCGAATCTTCTTCC---  
CTAATGGTACGGAACAATAGTATCATTGGAGTCGATACACAAATCACTTTAAATACA-----  
AAAAGTTCGAGTAGGGGGTTGATCCGAATAGAGAGAAAAAAAAAAAAAAAAAATG---  
GAACTTAAAATCTTTTCTGGAGATATCCATTTTCCGAGGGCGACAGATAAG-----  
ATATCCCAGTACAGTGGTATCTTGATA-----CCACCAGGAACAGTAAAAACA---AAT-----  
TCTAAGGAGTCG-----AAAAAGGTG-----AAAAATTGGATCTATGTCCAACGG-----ATCACACCTACCAAG--  
-----  
-----

Ranunculus GCCGGTTCCTCCCGAGTTGAGACCTATCATTAGATAGATGGGGTAACTAATGAGTTCG--

GATATTAATGAACTCTATCGAAGAGTTATCTATCGGAACAATACTCTTACCGATCTATTAACAACAAGTAGATCTACACC  
CGGAGAATTAGTAATGTGTGAGGAGAAATTAGTACAAGAGGCTGTGGATACACTTCTTGATAATGGGATCCGCGGACAAC  
CAACGAGGGACGGTCATAATAAAATTTATAAATCATTTCGGATGTAATTGAAGGAAAAGAGGGAAAGATTTTCGTGAGACT  
TTGCTTGGTAAACGGGTCGATTATTCGGGACGTTCCGTTATTGTTGTGGGCCCTTCGCTTTCATTACATCGATGTGGATT  
GCCCCGTGAAATAGCAATAGAGCTTTCCATACATTTGTAATTCGTGGTCTAATCAGACAACACATTGCTTCCAACATAG  
GAGTGGCTAAAAGTAAAATTCGGGAAAAAGCACCAATTGTGTGGGAAATACTTCAAGAAGTTATGCAGGGGCATCCTGTA  
TTGCTGAATAGAGCGCCACTTTGCATAGATTAGGCATACAAGCATTCCAACCCATTTTAGTGGAAAGGTCGTGCTATTTG  
TTTACACCCATTAGTTTGTAAAGGGATTCAATGCAGATTTTGTATGGGATCAAATGGCTGTTTCATATACCTTTATCTTTGG  
AGGCTCAAGCGGAGGCGCGTTTACTTATGTTTTCTCATATGAATCTTTTGTCTCCGGCTATTGGAGATCCCATTTCCGTA  
CCAACCTCAAGATATGCTTATGGGACTCTATGTATTAACGATCGGGAATCGTCGAGGTATTTGTGCAAATAGATATAATCC  
GTGG-----AATCAC-----AGAAAC-----TCTCAAATGAA---AAAATT---GACGAT-----  
-----AATAAC-----CATACGTATACAAAA-----

GAACCCTATTTTTGTAGTTCGTATGATGCACTTGGGGCTTTTCGCCAGAAACGGATTAATTTAGACAGTCTCTGTGGCT  
T-----CGATGG---CGACTA-----GATCAACGCGTCATTGCACCA-----  
AGAGAAGTTCCAATCGAAGTTCAATGTGAATCTTTTGGTACCTATCATGAGATTTATGGTCACTATCTAATAGTAAGAAA  
TGTCAACAAAAAATCTTTTGTATAGACATTCGAACTACTGTTGGTCTTATTTCTTTTTATCGAGAGATAGAAGAAGCCA  
TACAAGGGTTTTGTGCGGCTTGTCTATATAGTACC-----  
-----GAGGTA-----CTTATGGCAGAA---CGGGCCGATCTAGTCTTT--  
-----

CACAATAAAGCGATAGATGGAAGTCCATGAAACGGCTTATTAGCAGATTAATAGATCACTTTGGAATGGCATATACATC  
ACATATCCTGGATCAAGTAAAACTCTGGGTTTCCAGCAAGCAACTACTACATCTATTTTCATTAGGCATTGATGATCTTT  
TAACAATACCTTCTAAGGGATGGCTAGTACAAGATGCAGAACAACAAAGTTAATTTTGGAAAAACACCATAATTATGGA  
AATGTACATGCGGTAGAAAAATTACGTCAATCCATTGAGATCTGGTATGCTACAAGTGAATATTTACGCCAAGAAATGAA  
TCCTAATTTTAGGATGACTGATCCTTCTAATCCAGTCCATATAATGTCTTTTTTCGGGAGCTAGAGGAAATGCATCTCAGG  
TCCATCAATTAGTAGGTATGAGAGGATTAATGTGCGATCCTCAAGGACAAATGATTGATTTACCCATTCAAAGCAATTTA  
CGCGAAGGACTCTCTTTAACAGAATATATTTCTTGTCTATGGAGCTCGCAAAGGAGTTGTAGATACTGCTGTACGAAC  
ATCAGATGCTGGATACCTCACGCGCAGACTTGTGTAAGTAGTTCAACACATTGTTGTACGTAGAACAGATTGTGGTACCA  
CCCGAGGGATTTCTGTGAGTCTCGA-----AATGGG-----  
-----ATGATAACAGAAAAGATTTTTTATACAAAA-----

TTAATTGGTTCGTGATTAGCAGACGATCTATATATGGGTTTACGATGCATTGCCATTAGAAATCAAGATATTGGAGTTGG  
ACTTGTCAATCGATTCAACT-----  
TTTCGATCCCAACCAATATCTATTAGAACCCCTTTACTTGCAGGAGTACATCTTGGATCTGTGATTATGTTATGGCCG  
CAGTCCCACT-----  
CACGGCGACCTAGTTCGAATTGGGAGAAGCAGTCCGTATTATTGCGGGCCAATCTATTGGGGAACCGGGGACTCAACTAAC  
ATTAAGAACCTTTTCATACCGGCGGAGTATTTACAGGTGGTACTGCAGAACATGTACGAGCTCCTGATAATGGAAAAATAA  
AATTC AAC-----

GAAGGTTTGGTTTTATCCACACGCACACGTATGGATATCCTGCTTTTCTATGTTATATAGATCTATCTGTAACCTATTGA  
GGGTCCAGATATTTTACATAATGTGAATATTCACCAAAAAGTTTTATTTTAGTTAAAAATGATCAATATGTAGAATCAG  
AACAAGTGATTGCTGAGATTTCGCGCCGAAGCATCCACCTTGAAT-----  
TTTAAAGAGAGGGTTCGTAAACATATTTATTCTGACTCAGAGGGAGAAATGCCTGGAGTACCGCTGTG-----  
TACCAT-----

GCACCCGAATATACATATGGTAATGTTTCATCTCTTACCAAAAACGAGTCATTTGTGGATATTATCCGGAGTTCCG-----  
-CAGAGATCAAGT-----ATAGTCCCCTTTTCACTCCACAAGGATCAAGATCAAATAAATATTCATTCTCTT-----  
TCTGCC---AAACAAAATTTATTTCTG-----AATCTTTCTCTTTCAATGACTAATGATCAA-----  
-----

-----GTGATCAAAAAATTGTTTAGGTCAGATTCT---TCTGTTAAA-----  
-AAAGGGGGTTGGGTT-----CTT-----GATTAT---TCA---GGACCT-----GCTGAAGTCTTATGTAAT-  
-----GGTCATTGTAATTTAATACTCTGCCATTCTCGACGAGAATTCCGAT-----  
TTATTGGCAAAGAGGCGCAGAAATAGATTACCATTCCATTACAA-----TCTAATCAA-----  
GAAAAAGAACAAAA---CCCCGTTCA-----  
GGTATCTCGATTGAAATACCCATAAATGGTCTTTTCCGTATAAACAGTATTCTTGCTTATTTTGAAGATCCCCGATACAG  
AAGA-----AAGAGTTCGGGAATT-----  
-----  
-----

-----  
 -----  
 -----  
 -----ACTAAATATGGGACGATAGAGGTGGATTCA-----  
 -----  
 ATCGTAAAAAAGAAGATTTG---ATTGAGTATCGAAGAACAAAAGAATTTAGGCCAAAATAC-----  
 CAAATGAAAATAGATCGATTTTTTTTCATTCCTCCGAGGAAGTGCATATCTTACCCGGATCCTCTTCC---  
 ATAATGATACGGAACAATAGTATCATTGGCGTAGATACAAGAATTACTTTCAATATA-----  
 AGAAGTCAAGTAGGCGGATTGGTCCGAGTAGAGAAAAAAAAAAAAAAAAAAGATT---  
 GAATTAATAAATATTTTCTGGGAATATTTATTTTCTGGAGAGACAGATCCG-----  
 ATATCCTGGCACAGCGGCATCTTGATA-----CCACCTGGAGCAGGAAAAAAAA---AAT-----  
 TCTAAAGAATCT-----AAAAAATTG-----AAAAATGGGATCTATGTCCAAGG-----ATTACACCTACAAA--  
 -----  
 -----

Spinacia          ACCTGTTCTTCCTCCCGAGTTGAGACCGATCATTGAGATAGATGGAGGTAAATTAATGAGTTCG--  
 -

GATATTAATGAACCTTTATAGAAGAGTCATCTATCGGAACAATACTCTTACTGATCTATTATCAACAAGTAGATCTACGCC  
 GGGAGAATTAGTAATGTGTGTCAGGAGAAATTAGTACAAGAAGCCGTAGATACACTTCTTGATAATGGAATCCGTGGCCAGC  
 CAATGAGGGATGGTCATAATAAAGTTTACAAGTCATTTTTCAGATGTAATTGAGGGTAAAGAGGGGAAGATTTTCGTGAGACT  
 TTACTTGGTAAACGGGTCGATTATTCCGGACGTTCCGTTCATTTGTCGTAGGCCCTTCACTTTTATTACACCGATGTGGATT  
 GCCTCGTGAAATTGCAATAGAGCTCTTCCAGACATTTGTAATTCGTGGTCTAATTAGGCAACATCTTGCTTCGAACATAG  
 GAGTTGCTAAGCGTAAAATTCGGGAAAAGAGCCGATTGTATGGAAAATACTGCAGGAAGTTATGCAGGGGCATCCTGTA  
 TTATTAATAGAGCACCTACTCTTCATAGATTAGGTATACAGGCGTTCACACCTATTTTAGTGGAAGGGCGCGCTATTTG  
 TTTACATCCGTTAGTTTGTAAAGGATTCAACGCAGACTTTGATGGGGATCAAATGGCTGTTTATGTACCTTTATCTTTGG  
 AGGCTCAAGCAGAGGCCCGTTTACTTATGTTTTCTCATATGAATCTTTTGTCTCCAGCTATTGGCGATCCCATTTCCGTA  
 CCAACCCAAAGATATGCTTATTGGACTCTATATATTAACGAGCGGGAATCGTCGAGGTATTTGTGCAAATAGATATAATCC  
 ATGG-----AATCAC-----AAAACC-----TATCAAATGAA---AGAATT---GATGAT-----  
 -----ACTAAT-----TATAAGTCTATGAAA-----  
 GAACCCTTTTTTTGTAAATTTCTATGATGCAATTGGAGCTTATCGTCAGAAAAGAATTCATTTAGATAGCCCTTTGTGGCT  
 C-----CGGTGG---CAACTA-----GATCAACGCATTATTGCTTCA-----  
 AAAGAAGCTCCCATTTGAAGTTCACCTATGAATCTTTGGGCACCTATCATGAGATTTATGCGCACTATCTAATAATAAGAAG  
 TGTAATAAAGAAATTTATGATATATATATTCGAACTACTGTTGGTTCATATTTCTCTTTATCGAGAAATTGAAGAAGCTA  
 TACAAGGATTTTATCAAGCCTGCTCA-----  
 -----ATGGAGGTA-----CTTATGGCAGAA---CGGGCCAATTTGGTCTTT--  
 -----

CACAATAAAGCGATAGATGGAAGTCCATGAAACGACTTATTAGTAGATTAATAGATCATTGGAATGGCATATACGTC  
 ACACATCCTAGATCAACTAAAGACTCTGGGTTTCCAGCAAGCCACTGCTACATCCATTTTATTAGGAATTGATGATCTTT  
 TAACAATACCTTTCAAAGGATGGCTAGTCCAAGATGCTGAACAGCAAAGTTTGTATTTGGAAAAACACCACCATTATGGG  
 AATGTACACGCGGTAGAAAAATTACGTCAATCCATTGAGATATGGTATTCTACAAGTGAATATTTGCGACAAGAAATGAA  
 TCCCAATTTTAGGATGACTGACCCTTATAATCCAGTCCATATAATGTCTTTTTCGGGAGCTAGAGGAAATGTGTCTCAGG  
 TACATCAATTAGTAGGTATGAGAGGATTAATGTGCGATCCACAAGGACAAATGATTGATTTACCTATTCAAAGCAATTTA  
 CGGGAAGGACTCTCTTAAACAGAATATATAATTTCTTGTTACGGAGCCCGCAAAGGGGTTGTGGATACTGCTGTACGAAC  
 ATCCGATGCTGGATATCTCACGCGCAGGCTTGTGCAAGTAGTTCAACATATTGTTGTGCGTAGAAGAGATTGTGGCACCA  
 TTCGAGGTATTTCTGTAAGTCTCAA-----AACAGT-----  
 -----ACGATGCCGGAAGAATTTTGATCCAAACA-----  
 TTAATTGGTTCGTGATTAGCAGACGATATATATATGGGTTTACGATGCAATTGCCACCCGAAATCAAGATATCGGGGTTGG  
 ACTTGTCAATCGATTATAACG-----  
 CTTCAACCCAACTAATATCCATCCGAACTCCTTTTACTTGTAGGAGTGCCTTGGATCTGTGATTATGTTATGGCCG  
 GAGTCTACT-----  
 CACGGCGGCCTGGTTGAATTGGGAGAAGCTGTAGGTATTATTGCAGGTCAATCCATTGGGGAACCTGGTACTCAACTAAC  
 ATTAAGAATTTTATACGGGTGGAGTATTACAGGAGGGACTGCAGAACATGTACGAGCCCTTCTAATGGAAAAATCC  
 AATTCAAT-----  
 GAGGATTTGGTTCATCCACACGTACACGTACGGACACCCTGCCTTTCTATGTTATATCGACTTGTATGCTCACTATTGA  
 GAGTGACGATATTCTACATAATGTGAATATTCGCCAAAAGTTTTCTTTTAGTTCAAATGATCAATATGTTGAATCTG  
 AACAAGTGATTGCTGAAATTCGCGCAGGGACATCCACCTTGAAT-----  
 TTTAAGGAAAGGGTTCGAAAACATATTTATTTCTGATTGAGAAGGAGAAATGCACTGGAGTACTGATGTG-----

TACCAT-----  
GCACCCGAATTTACATATGGTAATGTTTCATCTCTTACCAAAAACAAGTCATTTATGGGTATTATCAGGAAAGCCG-----  
-TACAGATCGAGT-----GTAGTCCCCTTTTCGCTCTCCAAGGATCAAGATCAAATGAACACTCATTCTCTT-----  
TCTTTC---GAACAAATATATATTTCT-----AACCCC-----TCAGTCACTAACGATCAA-----  
-----  
-----GTAAAAGATAAATTA-----TCGGACTCT---TTTAGTAAA-----  
-AAAGAGGATAGGATT-----ACG-----GATTAT---TCA---GAACTT-----AATCGAATAGGT-----  
-----CATTGTAATCTCATCTATCCTGCA-----AAAAATTTGGAT-----  
TTATTGGCAAAGAAACGAAGAAATAGATTTATTATTCCATTTCAA-----GGAAGTCAAGAA-----  
CGAAAAAAGAATTAATG---TCCCTTTCC-----  
GGTATCTCGATTGAAATACCCATAAATGGTATTTTCCGTAAAAATAGTATTTTTGCTTATTTTCGATGATCCTCGATACCG  
AAGA-----AAGAGTTCGGGAATT-----  
-----  
-----ACAAAATATGGGACTATAGAGATGCATTCA-----  
-----

ATCGTTAAAAAAGAGGATTTG---ATTGAATATCGAGGAGTCAAAGAATTTTCGACCAAAATAC-----  
CAAATGAAAGTCGATCGGTTTTTTTTTTCATTCTGAAGAAGTTCATATCTTAGCCGGATCTTCGTCC---  
ATAATGGTACGCAACAATAGTATCATTGGAGTAGATACGTGGATCACTTTAAATACA-----  
AGAAGCCGAATAGGCGGGGTGGTCCGAGTGGAGAGGAAAAAAAAAAGATT---  
GAACTTACCATTTTTTCGGGAGATATCCATTTTCCCGGGGAGACAGATAAG-----  
ATATCCCACACAGTGGCATTTTGATA-----CCACCAAGC-----AGGAAA---AAT-----  
TCCAAGGACTCA-----AAAAATTTA-----AAAAAATGGATCTATGTCCAACGG-----ATCACCCCTACTAAG--  
-----  
-----

Triticum ACCGGTTCTTCCCTCCCGAATTGAGACCTATTGTTTATAGGTCTGGAGATAAAGTAGTGACTTCA--  
-

GACATTAATGAACTTTATAAGAGAGTTATCCGTGGAACAACAATCTTGCCATCTATTAATAAAGAAGTGAATTAGCGCC  
AGCAGATTTAGTAATGTGCCAGGAAAAATTGGTACAAGAAGCCGTGGATACACTTCTTGATAGTGGGTCCCGCGGGCAAC  
CGACGAGGGATGGTCACAATAAAGTATACAAATCACTTTAGATGTAATTGAAGGTAAAGAGGGAAGGTTTTCGCGAGACT  
CTGCTTGGGAAACGGGTCGATTACTCGGGGCGTTCTGTCAATTGTTGTGGGTCTTTCGCTTTTATTACATCAATGTGGATT  
ACCTCTAGAGATAGCAATAAAGCTTTTTTTCAGCTATTTGTAATTCGCGATTTAATCACGAAACCGGCCACTTCTAATGTAA  
GGATTGCTAAAAGGAAAATTTGGGAAAAAGAACCCATTGTATGGGAAATACTTCAAGAAGTTATGCGGGGACATCCTGTA  
CTGTTAAATAGAGCACCTACCCTGCATAGATTAGGCATACAGGCCTTTCAACCCACTTTAGTAGAGGGGCGTACTATTTT  
TTTACACCCATTAGTGTGTAAGGGTTTTCAATGCGGACTTTGATGGAGATCAAATGGCTGTTTCATCTACCTTTATCCTTGG  
AAGCTCAGGCAGAAGCCCGTTTACTTATGTTTTCTCATATGAATCTCTTATCTCCCGCTATTGGGGATCCTATTTGCGTA  
CCAACCCAAGACATGCTTATCGGGCTTTATGTATTAACGATTGGAAAGCGTCGAGGTATTTGTGCAAATAGATATAAT--  
-----AGTTGC-----AGAAAC-----TATCCAAATCTA---AAAGTAAATTACAAT-----  
-----

AATAATAATAATTCTAAATATAGGAAAGATAAAGAACCCCATTTTTCTAGTTCTTATGATGCACTGGGAGCTTATAGACA  
AAAATAATCAGTTTAGATAGTCCCTTGTGGCTA-----CGATGG---AACCTG-----  
GATCAACGCGTCATTGGGTCA-----  
AGAGAAGTTCAGATTGAAGTTCAATATGAATCTTTGGGGACTTATCATGAGATTTATGCCACTATCTAATAATGGGAAA  
TAGAAAAAAGAAATTCGTTTCGATATACATTCGAACCACTCTTGGTCATATTTCTTTTTATAGAGAAATAGAGGAAGCCA  
TACAAGGATTTAGTCAGGCCTAT-----  
-----ATGGCGGAA---CGGGCCAATCTGGTCTTT--  
-----

CATAATAAAGAGATAGACGGAAGTGGTATGAAACGACTTATTAGCAGATTAATAGATCATTTTGGAAATGGGATATACATC  
CCATATACTGGATCAACTAAAGACTCTGGGCTTCCATCAAGCCACTACTACATCGATTTTCGTTAGGAATCGAGGATCTTT  
TAACAATACCCTCTAAGGGATGGTTAGTCCAAGACGCGGAACAACAGAGTTTTCTTTTTGGAGAAACACTATTATTATGGG  
GCTGTACACGCGGTAGAAAAATTACGCCAATCTGTTGAGATATGGTATGCGACAAGTGAATATTTGAAACAAGAAATGAA  
TTCCAATTTTCGATAACGGATCCTTCTAATCCAGTCTATCTAATGTCTTTTTTTCAGGAGCCAGAGGAAATGCATCTCAAG

TACACCAATTAGTAGGTATGAGAGGATTAATGTCTGGACCCTCAAGGACAAATGATTGATTTACCTATTCAAAGCAATTTA  
CGCGAGGGACTTTCTTTGACAGAATATATAATTTCTGCTATGGAGCCCACAAAGGGGTTGTAGATACTGCTGTGCGAAC  
AGCAGATGCTGGATATCTTACACGTAGACTTGTGGAAGTAGTTCAACATATTATTGTGCGTAGAAGAGATTGTGGTACTA  
TCCGAGGTATTTCTGTAAGTCCTCAA-----AATGGG-----  
-----ATGACGGAAAACTTTTTGTCCAAACA-----  
CTAATTGGTCGTGTATTAGCAGACGATATATATATCGGTTACAGATGCATTGCCGCGCGAAATCAAGATATTGGAATTGG  
ATTAGTCAATCGATTATACTGCCTTTTCGAGCACAACCATTTTCGAGCACAACCAATATATATTAGAACCCCTTTACTT  
GCCGAAGCACTTCTTGGATCTGTCAATTATGCTATGGCCGGAGTCCTACT-----  
CATAGTGTCTGGTCGAATTGGGAGAAGCCGTAGGTATTATTGCAGGTCAATCAATTGGGGAGCCAGGGACTCAACTAAC  
ATTAAGAACTTTTCTACTGGCGGAGTATTCACAGGGGTACTGCCGACCTTGTACGATCCCCTTCGAATGGAAAAATAA  
AATTCAAT-----  
GAGAATTTGGTTACCCACACGTACCCGTATGGGCAGCCTGCTTTTCTATGTTATATAGACTTGCATGTAACTATTCA  
GAGTCAAGATATTCTATATAGTGTGAATATTCCTCAAAAAGCTTGATTCTAGTGCAAAATGATCAATATGTAAAATCCG  
AACAAAGTAATTGCGGAGATTTCGTGCCGGAACGTCCACTTTACAT-----  
TTTAAAGAAAGGGTACAAAAGCATATTTATTCTGAATCAGACGGCGAAATGCCTGGAGTACTGATGTT-----  
TACCAT-----  
GCGCCCGAATATCAATATGGTAATCTTCGCCGATTACCAAAAACAAGCCATTTATGGATATTGTCAGTAAGTATG-----  
-TGCAGATCCAGT-----ATAGCGTCTTTTTCACTCCACAAGGATCAAGATCAAATGAATACTTAT-----  
-----  
-----GGTAAA-----  
AAAGATAGGGAAATT-----CTT-----GATTAT---TCA---ACGTGC-----GATCGAATCATGTCCAAT--  
----GGCCATTGGAATTTTATCTATCCTTCTATTTTTCAAGATAATTCAGAT-----  
TTGTTGGCGAAAAGCGAAGAAATAGGTTTCGTCAATCCATTACAA-----TATCATCAAGAA-----  
CAAGAGAAAGAACTAATA---TCCTGTTTT-----  
GGGATTTTCGATTGAAATCCCCCTTATGGGTGTTTTACGTAGAAATACTATTTTTGCTTATTTTGACGATCCCCGATACAG  
AAAAGATAAAAAGGGTTTCAGGAATTGTTAAATTTAGATATAGGACCCTAGAAGAAGAATATAGG-----  
-----  
ACTCGAGCGGAAGACTCAGAAGAGGAATATGAG-----  
-  
ACCCTAGAAGACGAATACAGGACCCGAGAGGACGAATATGAATATGAAACCCTAGAAGAATCTAAATATGGAATCCTAGA  
AGACGAATACGAATATGAAACCCTAGAAGACGAATATGGGAGCCCAGAAAAC-----  
GAATATGGGAACCCAGAGAACGAATATAGGACTTTAGAGAAAGACTCAGAAGAGGAATATGGGAGCCCAGAGAGCAAATA  
TAGGACCCAAGAG---GAC---  
GAATATGGAATATAGAGGAAGACTCAGAAGACGAATATGGCAGCCCCGGGGAAAGCGCAGAGGAAAAATATGGTACTTT  
AGAGGAAGACTCA-----GAAGAAGATTTCAGAG-----  
GATGAATACGAGAGCCCAGAGGAAGATTCCATCTTAAAAAAGAGGGTTG---  
ATTGAGCATCGAGGAACAAAAGAATTTAGTCTAAAATAC-----  
CAAAAAGAAGTAGATCGGTTTTTTTTTTCATTCTTCAAGAACTTCATATCTTGCCGAGATCTTCATCC---  
CTAAAGATACTTGACAATAGTATTATTGGAGTGGATACACAACCTCACAAAAATACA-----  
AGAAGTGCAGTAGGCGGACTGGTCCGAGTGAAGAGAAAAAAGCCATACG---  
GAACTCAAAATATTTCCGGAGATATTCATTTTCTGAAGAGGCGGATAAG-----ATATTA-----  
GGTGGCTGTTTGATA-----CCGCCAGAAAGACAAAAAAA---GAT-----TCTAAGGAATCA-----  
AAAAAAGG-----AAAAATTGGGTCTATGTTCAACGGAAAAAATTTCTCAAGAGCAAG-----  
-----

Typha ACCAGTTCTTCTCCCGAATTGAGACCAATCATTTCAGATAGATGGGGGTAAATTAATGAGTTTCG--  
-

GATATTAATGAACTCTATCGAAGAGTTATTTATCGGAACAATACTCTTACCGATCTATTAGCAACAAGTAGATCTACGCC  
AGGGGAATTAGTAATGTGTGTCAGGAGAAATTGGTACAAGAAGCCGTGATACACTTCTTGATAATGGGATTTCGTGGGCAAC  
CAATGAGAGATGGTCATAATAAAGTTTACAAGTCATTTTCAGATGTAATTGAAGGTAAAGAAGGAAGATTTTCGTGAGACT  
CTGCTTGGTAAACGGGTTCGATTATTCGGGACGTTCCGTCAATGTCGTGGGTCTTTCGCTTTTATTACATCAATGTGGATT  
ACCGCGAGAAATAGCAATAGAGCTTTTCCAAACATTTGTAATTCGTGGTCTAATCTGGCAACATGGTGTCTTCTAACATAG  
GGATTGCTAAAAGTAAAATTCGGGAAAAAGAACCAATTGTATGGGAAATCTTCAAGAAGTTATGCAGGGGCATCCTGTA  
TTGTTGAATAGAGCACCCACCCTGCATAGATTAGGCATACAAGCGTTCCAACCCATTTTAGTAGAGGGACGTGCTATTTG  
TTTACACCCATTAGTTTGTAAAGGTTTCAATGCAGACTTTGATGGGGATCAAATGGCTGTTTCATGTACCTTTATCTTTGG

AAGCTCAAGCGGAGGCCCGTTTACTTATGTTTTCTCATATGAATCTCTTGTCTCCAGCTATTGGCGATCCCATTTCTGTG  
CCAACCCAAGATATGCTTATCGGACTCTATGTATTAACGATCGGAAATCGTCGAGGTATTTGTGCAAATAGGTATAATCC  
GTAT-----AATTGC-----GGAAAC-----TATCAAATAAAA---ACAGTT---GACAAT-----  
-----AATAAC-----  
TATAGGTATACGAAAGAAAAAGAACCGTATTTTTGTAGTTCCTATGATGCACCTGGAGCTTATCGGCAGAAACGAATTAG  
TTTAGATAGTCCTTTGTGGCTC-----CGATGG---AAACTA-----GATCAACGTGTCATTGGGTCA-----  
AGAGAAGTCCCATCGAAGTTC AATATGAATCTTTGGGTACTTATCATGAGATTTATGGTCACTATCTAATGGTAGGAAG  
TGTAAGAAAAAGAAATCCGGTGTATATACATTTCGAACCACTCTGGGTATATTTCTTTTATCGAGAAATAGAAGAAGCCA  
TACAAGGGTTTTGTCTGGGCCTACTCATA-----  
-----ATAGAGGTA-----CTTATGGCAGAA---CGGGCCGATCTGGTCTTT---  
-----  
CACAAATAAGTGATAAATGGAACCTGCTATGAAACGACTTATTAGCAGATTAATAGATCATTTCGGAATGGGATATACATC  
ACATATACTGGATCAAGTAAAGACTTTAGGTTTTCCATCAAGCCACTGCTACATCTATTTTCATTAGGAATTGATGATCTTT  
TAACAATACCTTCTAAGGGATGGTTAGTCCAAGACGCTGAACAACAAAGTTTTATTTTGGAGAAACACCATCATTATGGG  
AATGTGCATGCGGTAGAAAAATTACGTCAGTCCATTGAGATATGGTATGCTACAAGTGAATATTTGAGACAAGAAATGAA  
TCCAAATTTTCAGATGACTGATCCTTCTAATCCAGTTTATCTAATGTCTTTTTCGGGAGCTAGGGGGAATGCATCTCAGA  
TACACCAATTAGTAGGTATGAGAGGATTAATGTCAGATCCCCAAGGACAAATGATTGATTTACCCATTCAAAGCAATTTA  
CGCGAGGGACTTTCTTTGACAGAATATATAATTTCTGCTATGGAGCCCGCAAAGGAGTTGTAGATACTGCTGTACGAAC  
ATCAGATGCTGGATATCTTACACGTAGACTTGTGAAGTAGTTCAACACATTATTGTACGTAGAAGAGATTGTGGTACTA  
TCCGAGGTATTTCCGTGAGTCCTCAA-----AATGGG-----  
-----ATGACGGAAAAAATTTTTGTCCAAACA-----  
CTAATTGGTCGTGTATTAGCAGACGATATATATATCGGCCACGATGCATTGCCACTCGAAATCAAGATATTGGGATTGG  
ACTTGTGAATCGATTATAACC-----  
TTTCGAGCACAACCAATATATATTAGAACCCATTTACTTGCAGGAGTACATCTTGGATCTGTCAATTATGTTATGGTCTG  
GAGTCCCACT-----  
CATGGCGATTTGGTTCGAATTGGGAGAAGCCGTAGGTATTATTGCGGGTCAATCAATTGGGGAACCGGGGACGCAACTAAC  
ATTAAGAATTTTCATACCGGTGGAGTATTCCTGTTGGTACTGCCGAACATGTACGAGCTCCTTCTAATGGGAAAATCC  
AATTCAAT-----  
GAGGATTTGGTTTCCACACGTCACCCGTCATGGACACCCTGCTTTTTTTATGTTCTATAGACTTGTATGTAACTATTGA  
GAGTCGAGATATTATACATAATGTGAATATTCACCAAAAAGTTTTGATTTTTAGTTCAAAATGATCAATATGTAGAATCAG  
AACAAGTGATTGCTGAGATTCTGCTGGAACGCTACTTTTCAT-----  
TTTAAAGAGAGGGGTACGAAAACATATTTATTCTGAATTAGAGGGAGAAATGCCTGGAGTACCGACGTC-----  
TACCAT-----  
GCACCTGAATATACATATGGTAATGTTTATTATTACCAAAAACAAGCCATTTATGGATATTAGCAGGAGGTCCG-----  
-TGCAGATCCAGT-----ATAGTGTCTTTTTCGCTCCACAAGGATCAAGATCAAATGAATGTTGATTCTTTTT-----  
TCTGTT---GAAGGAAGATATATCTCG-----GACTTC-----TCAATGACTAATGATCAA-----  
-----  
-----GTAAGACATAAAATTGTTA-----TATACT---TCTTATAAA-----  
-AAAGATAGGGAAATT-----CTT-----GACTAT---TCA---AGACCT-----GATCAAATCATATCCAAT-  
-----AGTCATTGGAATTTTCATATATCCTTCTATTCTCCAAGAGAATTCTGAT-----  
TTCTTAGCGAAAAAGCGAAGAGATAGATTTCATCATCCATTACAA-----TATGATCAAGAA-----  
CAAGAGAAAGAACTAATA---CCCTGTTTT-----  
GGTATTTTCGATTGAAATACCCATAAATGGTATTTTACGTAGAAAAAGTATTCTTGCTTATTTTGTATGATCCACGATACAG  
AAGA-----AACAGTTCCAGGAATT-----  
-----  
-----  
-----  
-----  
-----  
-----  
-----ACTAAATATGGAACCATAGAGGTAGATTCA-----  
-----  
ATCATAAAAAAAGAGGATTTG---ATTGAGTATCGAGGAACAAAAGAATTTAGTCCGAAATAC-----  
CAAATGAAAGTAGATCAGTTTTTTTTTTCATTCTCGAAGAAGTGCATATCTTGCCGGGATCCTCATT---  
ATAATGGTCCGGAACAATAGTATCATTGGAGTAGATAACGACTCACTTTAAATACA-----  
AGAAGCCGAGTAGGTGGATTAGTCCGAGTGGAGAGAAAAAATAATATATT---  
GAATTGAAAATCTTTTCTGGCGATATTCATTTTCTGGCGAGACAGATAAG-----



ATATCCAGGCACAGCGGCATTTTGATA-----CCACCAGAAACAGAAAAAAAA---AAC-----  
TCTAAGGAATCA-----AAAAAATTG-----AAAAATTGGATTTATGTTCAACGT-----ATCACACCTACCAAG--

Vitis ACCAGTTCTTCCCTCCCGAGTTGAGACCGATCATTAGATAGATGGGGGTAACTAATGAGCTCG--

GATATTAATGAACTCTATAGAAGAGTTATCTATCGGAACAATACTCTTACCGATCTATTAACAACAAGTAGATCTACACC  
AGGGGAATTAGTAATGTGTGTCAGGAGAAAATTGGTACAAGAAGCCGTGGATACACTTCTTGATAATGGAATCCGCGGACAAC  
CAATGAGGGACCGGTATAATAAGGTTTACAAGTCGTTTTAGATGTAATTGAAGGCAAAGAAGGAAGATTTTCGTGAGACC  
CTGCTTGGCAAACGGGTCGATTTATTCGGGGCGTTCCTGTCATTGTCGAGGCCCTTCACTTTTATTACATCAATGTGGATT  
GCCTCGCAAATAGCAATAGAACTTTCCAGACATTTTAAATTCGCGGTCTAATTAGACAACATCTTGCTTCGAACATAG  
GAGTTGCTAAGAGTCAAATTCGAGAAAAAGAACCGATTGTATGGGAAATACTTCAGGAAGTTATGCGGGGCATCCTGTA  
TTGCTGAATAGGGCACCTACTCTGCATAGATTAGGCATACAGGCATTCCAACCTATTTTAGTGGAAAGGACGTGCTATTTG  
TTTACATCCATTAGTTGTAAGGGATTCAATGCAGATTTTGTATGGGGATCAAATGGCTGTTTATGACCTTTTATCTTTGG  
AGGCTCAATCGGAGGCTCGCTTACTTATGTTTTCTCATATGAATCTTGTCTCCAGCCATTGGGGATCCCATTTCCGTA  
CCAATCAAGATATGCTTATTGGACTCTATGTATTAACGAGCGGGAATCGTCGAGGTATTTGTCAAATAGGTATAATCC  
ATGT-----AATCGA-----AGAAAC-----TATCAAATGAA---AGAATT---GACGAT-----  
-----AATAAC-----

TATAGGTATACGAAAGAAAAAGAACCCTTTTTTTGTAATTCCTATGATGCAATTGGAGCTTATCGGCATAAAAGAATTAA  
TTTATATAGTCCTTTGTGGCTC-----CGGTGG---CAACTA-----GATCAACGCCTTATTGCTTCA-----  
AAAGAAGCTCCCATCGAAGTTCATATGAATCTTTGGGTACCTATCATGAGATTTATGGGCACTATCTAATAGTAAGAAG  
TGTAATAAAGAGATTCTTTGATATACATTCGAACCACTGTTGGTCATATTTCTCTTTATCGAGAAATCGAAGAAGCCA  
TCCAAGGCTTTTGTGCGGCCTGCTCATATGAGACC-----  
-----ATGGGGGTA-----CTTATGACAGAA---AGGGCTAATCTGGTCTTT-----

CACAATAAAGTGATAGATGGAAGTCCCATGAAACGACTTATTAGCAGATTAATAGATCACTTCGGAATGGCATATACATC  
ACACATCCTGGATCAAGTAAAGACTCTGGGTTTCCAGCAAGCCACTGCTACATCCATTTTATTAGGAATTGATGATCTTT  
TAACAATACCTTCTAAGGGATGGCTAGTCCAAGATGCTGAACAACAAAGTTTGGATTTTGGAAAAACACCATCATTATGGG  
AATGTACACGCGGTAGAAAAATTACGCCAATCCATTGAGATCTGGTATGCTACAAGTGAATATTTGCGACAAGAAATGAA  
TACTAATTTTAGGATGACTGACCCCTTTAATCCAGTTCATATAATGTCTTTTTTCGGGAGCTAGAGGAAATGCATCTCAGG  
TACACCAATTAGTAGGTATGAGAGGATTAATGTCAGATCCCCAAGGACAAATGATTGATTTACCCATTCAAAGCAATTTA  
CGTGAGGGGCTCTCTTTAACAGAATATATAATTTCTTGCTACGGAGCCCGCAAGGGGGTTGTAGATACTGCTGTACGAAC  
ATCAGATGCTGGATATCTCAGCGTAGACTTGTGTAAGTAGTTCAACACATTGTTGTACGTAGAACAGATTGTGGCACTA  
TCCGAGGTATTTCTGTGAGTCCTCGA-----AATGGG-----  
-----ATGATACCGGAAAGAATTTTTATTCAAACA-----

TTAATTGGTCGTGTATTAGCAGACGATATATATATGGGCCACGATGCATCGCCATTGAAATCAAGATATTGGGATTGG  
GCTTGTCAATCGATTCAATACC-----  
TTTCAAGCACAGACAATATCGATTGCAACCCCTTTACTTGTAAAGAGCACATCTTGGATCTGTGACTATGTTATGGTCG  
GAGTCCTACT-----  
CATGGCGACCTGGTTCGAATTGGGAGAAGCTGTAGGTATTATTGCGGGGCAATCTATTGGAGAACCAGGGTACTCAACTAAC  
ATTAAGAATTTTTCATACCGGCGGAGTATTCACTGGGGTACTGCAGAGCATGTACGAGCCCTTCTAATGGAAAAATAA  
AATTCAAT-----

GAAGATTGGGTTTATCCACACGTACACGTCATGGACATCCTGCTTTTCTATGTTATATAGACTTGTATGTAAGTATTGA  
GAGTGAAGGAATTATACATAACGTGAATATTCCCCCAAAAGTTTTCTTCTAGTTCAAATGATCAATATGTAGAATCAG  
AACAAGTGATTGCTGAGATTTCGTGCAGGAACATACACTTTCAAT-----  
TTTAAGGAAAGGGTTCGAAAACATATTTTCTGACTCAGAGGGAGAAATGCATTGGAGTACCGATGTG-----  
TACCAT-----  
GCACCTGAATTTACATATGGTAATGTTTATCTATTACCAAAGACAAGTCATTTATGGATATTATCTGGGGGTTCA-----  
-TGCAGATTAGT-----ATAGTCCCTTTTTGATCCACAAGGATCAAGATCAAATGAGCGTTTCTTCTTT-----  
TCTGTC---GAACGAAGATATATTTCT-----AACCCC-----TCAGTACTAATGATCAA-----

-----GTGATACACGAATCTTTAGTTCTGATCTT---TCTGGTAAA-----  
-AAAGAAGGTAGGATT-----CCT-----GCTTAT---TCA---GAACTT-----AATCGAATCATATATACT-  
-----GGTCTTTATAATCTCATAGATCCTGCCATTCTACACGAGAATTCTGAT-----  
TTATTGGCAAAGAGGCGAAGAAATAGATTATCATTCCATTCAA-----TCGATTCAAGAA-----

GGAGAGAAAGAACTAATG---CCCCCTTCA-----  
GGTATCTCGATTGAAATACCTATAAATGGTATTTTTCCGTAGAAATAGTATTCTTGCTTATTTTCGACGATCCTCGATACAG  
AAGA-----AACAGCTCAGGAATT-----  
-----  
-----  
-----  
-----  
-----  
-----  
-----ACTAAATATGGGACTATAGAGGCGCATTCA-----  
-----  
ATCGTTAAAAAAGAGGATTTG---ATTGAATATCGAGGAGTCAAAGAATTTAAGCCAAAATAC-----  
CAAATGAAAGTAGATCGATTTTTTTTTCATTCCCAGGAAGTGCATATTTTACCCGGATCTGCTTCC---  
ATAATGGTACGGAACAATAGTATCATTGGAGTAGATACACGAATCACTTTAAATACA-----  
AGAAGCCGAGTAAGTGGATTGGTCCGAGTGGAGAGAAAAAAGGATT---  
GAACTTAAATCTTTTCTGGAGATATCCAGTTTCTGGAGAGACAAATAAG-----  
ATATCCCAGACATCGGCATCTTGATA-----CCACCAGGAACGAGAAAAAAA---AAT-----  
TCCAAGGAATCA-----AAAAAATTG-----AAAAATTGGATCTATGTCCAAGGG-----ATCACACCTACCAAG--

Yucca ACCAGTCCTTCCCTCCCGAGTTGAGACCAATCATTTCAGATAGATGGGGGTAAACTAATGAGTTCG--

GATATTAATGAACCTCTATAGAAGAGTTATCTATCGGAACAATACTCTTACCGATCTATTAGCAACAAGTAGGTCTACGCC  
AGGAGAATTAATAATGTGTAGGAGAAATTTGGTACAAGAGGCTGTGGATACACTTCTTGATAATGGGATACGCGGACAAC  
CAATGAGGGATGGTCATAATAAAGTTTACAAGTCATTTTCAGATGTAATTGAAGGCCAAAGAGGGGAAGATTTTCGTGAGACT  
CTGCTTGGTAAACGGGTCGATTATTCGGGGCGTTCCTGTCATTGTGCTGGGTCTTTCGCTTTTCATTACATCAATGTGGATT  
ACCACGAGAAATAGCAATAGAGCTTTTCCAAACATTTGTAATTCGTGGTCTAATCAGACAACATATTGCTTCTAACATAG  
GGATTGCGAAAAGTAAAATTCGGGAAAAAGAACCAGTGTATGGGAAATACTTCAAGAAGTTATGCAGGGGCATCCTGTGA  
TTGTTGAATAGAGCACCTACCCTGCATAGATTGGGCATACAGGCCTTCCAACCCATTTTAGTGGAGGGACGCGCTATTTG  
TTTACACCCATTAGTTTGTAAAGGGCTTTAATGCAGACTTTGATGGGGACCAAAATGGCTGTTTCATGTACCTTTATCTTTGG  
AAGCTCAAGCGGAAGCCGTTTACTTATGTTTTCTCATATGAATCTCTTGTCTCCAGCTATTGGAGATCCCATTTCCGTA  
CCGACTCAAGATATGCTTATCGGACTCTATGTATTAACGATCGGAAATCGGCGGGGTATTTGTGCAAAATAGGTATAATCC  
ATAT-----AATTGC-----GGAAC-----TATCAAAATAAA---ACAGTT---GACAAT-----  
-----AATTAC-----

TATAAATATACGAAAAAGAAAGAACCGTATTTTTGTAGTTTCTATGATGTGCTTGGAGCTTATCGGCAGAAACGAATCAA  
TTTAGATAGTCCTTTTTGGCTC-----CGGTGG---CGACTA-----GATCAACGCGTCATTGGCTCA-----  
AGAGAAGTTCATCGAAGTTCAATATGAATCTTTGGGTACTTATCATGAGATTTATGGGCACTATCTAATAGGGGAAG  
TGTGAAAAAAGAAATCCGTTGTATATACATTCGAACCACTATTGGTTCATGTTTCTTTTTCGAGAAATAGAAGAAGCCG  
TGCAGGGGTTTTGTGCGGCATACGCT-----  
-----ATGGAGGTA-----CTTATGGCAGAA---CGGGCCGATCCGGTCTTT--

TACAATAAAGTGATAGATGGAACGCTATGAAACGACTTATTAGCAGATTAATAGATCATTTCGGAATGGCATATACATC  
ACATATCTTGGATCAAGTGAAGACTTTGGGTTTCCAGCAAGCCACTGCTACATCTATTTTCATTAGGGATTGATGATCTTT  
TAACAATACCTTCTAAGGGATGGTTAGTCCAAGATGCTGAACAACAAAGTTTTATTTTGGAGAAACACCATCATTATGGG  
AATGTACACGCGGTAGAAAAATTACGTCAATCCATTGAGATATGGTATGCCACAAGTGAATATTTGAGACAAGAAATGAA  
TCCTAATTTTCGGATGACTGATCCCTCTAATCCAGTCCATCTAATGTCTTTTTCGGGAGCTCGAGAAATGCATCTCAGG  
TACATCAATTAGTAGGTATGAGAGGATTAATGTCCGATCCCAAGGACAAATGATTGATTTACCCATCCAAGCAATTTA  
CGCGAAGGGCTTTCTTTGACAGAATATATAATTTCTGCTACGGAGCGGAAAAGGGGTCGTGGATACTGCTGTACGAAC  
ATCAGATGCTGGATACCTCACGCGTAGACTTGTGGAAGTAGTTCAACACATTATTGTACGTAGAACAGATTGTGGTACTA  
TCCGAGGTATTTCCGTGAGTCCTCGA-----AATGGG-----  
-----GTGACAGAAAAAATTTTTGTCCAAACC-----

CTAATTGGTCGTGATTAGCAGACGATATATATATAGGGATACGATGCATTGCCACTCGAAATCAAGATATTGGGATTGG  
ACTTGCCAATCGATTATAACC-----  
TTTCGAGCACAACCAATATATATTCGAACCCCTTTACTTGCAGGAATACATCTTGGATCTGTCAATTATGTTATGGCAG  
AAGCCCCACT-----  
CACGGCGGCTGGTCAATTTGGGGGAAGCCATAGGTATTATTGCGGGTCAATCAATTGGGGAACCTGGAACCTCAACTAAC  
ATTAAGAATTTTCATACGGGTGGAGTATTCACAGGCGGTACTGCCGAACATGTACGAGCTCCTTCTAATGGAAAAATAA

AGTTCAAC-----  
GAGTATTTGGTTTCATCCACACGTACCCGTCATGGGCATCCTGCTTTTCTATGTTCTATAGACTTGTATGTAACCTATTGA  
GAGTCGGGATATTATACATAGTGTGAATATCCACCAAAAAGTTTTGATTTTTAGTGCAAAATGATCAATATGTAGAATCTG  
AACAAAGTGATTGCTGAGATTCGTGCCGGAACGTCCACTTTTTCAT-----  
TTTAAAGAGAAGGTTTCGAAAACATATTTATTCTGAATCAGAGGGAGAAATGCATTGGAGTACCGATGTC-----  
TACCAT-----  
GCACCCGAATATACATATAGTAATGTTTCATCTATTACCAAAAACAAGTCATTTATGGATATTAGCAGGAGGTCCG-----  
-TGCGGATCCAGT-----ATAGTGTCTTTTTTCGCTCCACAAGGATCAAGATCAAATGAATGTTTCATTTTTTT-----  
TCTGTC--GACGAAATAGATATCTCT-----GACCTC-----TCGATCACTAATGATCGA-----

-----  
-----GTAAGACATAAATTGTTG-----GATCCT---TCTGGTAAA-----  
-AAAGATAGGGAAATT-----CTT-----GACTAT---TCA---AGACTT-----GATCGAATCATATCCAAT-  
-----GGTCATTGGAATTTTCATATATCCTTTCGATTCTCCAAGAGAATTCCGAT-----  
TTCTTGGCAAAAAGCGAAGAAATAGATTTCTCATCCATTACAA-----TATGATCAAGAA-----  
CGAGAGAAAGAACTAATA---CCCTCTTTT-----  
AATATTTCCATTGAAATACCCATAAATGGTATTTTACGTAGAAATAGTATTCTTGCTTATTTTTGATGATCCACGATACAG  
AAGA-----AAGAGTTCGGGAATT-----

-----ATTAATATGGGACTGTAGAGGCGGATTCA-----

ATCGTAAAAAAGAGGATTTG--ATTGAGTATCGAGGAGCAAAAAGAATTTAGTCCGAAATAC-----  
CAAATGAAAGTGGATCGGTTTTTTTTTATTCCCGAAGAGGTACATATCTTACCCGGATCTTCGTCC---  
ATAATGGTTCGTAACAATAGTATCATTGGAGTAGATACACAACCTCGCTTTAAATACAAATACAAGAAGCCGAGTAGGTGG  
ATTAGTCCGAGTGGAGAGAAAAAAAAGTATT---  
GAACTGAAAATCTTTTTCTGGAGATATTCATTTTTCCCGGAGAGACAGATAAG-----  
ATATCCAGACACAGTGGCATTGATA-----CCGCCAGGAACGGAAAAACA---AAT-----  
TCTAAGGAATCA-----AAAAAATTG-----AAAAATGGGATCTATGTCCAACGG-----ATCACACCGACAAAA--

Zea ACCGGTTCCTCCTCCCGAATTGAGACCCATTGTTTTATAGATCTGGGGATAAAGTAGTGACTTCA--

GATATTAATGAACTTTATAAGAGAGTTATCCGTCGGAACAACAACCTTGCCTATCTATTA AAAAGAAGTGAATTAGCACC  
AGCAGATTTAGTAATGTGCCAGGAAAAATTGGTACAAGAAGCCGTGGATACACTTCTTGATAGTGGGTCCC GCGGGCAAC  
CGACGAGGGATGGTCACAATAAAGTATACAAATCACTTTCAGATGTAATTGAGGGTAAAGAGGGGAGGTTTCGCGGACT  
CTGCTTGGGAAACGGGTCGATTACTCGGGGCGTTCTGTCAATTGTTGTGGGTCCTTCGCTTTTCATTACATCAATGTGGATT  
ACCTCTAGAGATAGCAATAAAGCTTTTTTCAGCTATTTGTAATTCGCGATTTAATCACGAAACGTGCTACTTCTAATGTCA  
GGATTGCTAAAAGGAAAATTTGGGAAAAGGAACCCATTGTATGGGAAATACTTCAAGAAGTTATGCGGGGACATCCTGTA  
CTGTTGAACAGAGCACCTACCCTGCATAGATTAGGCATACAGGCCTTCCAACCCACTTTAGTAGAGGGACGTACTATTTG  
TTTACATCCATTAGTGTGTAAGGGTTTCAATGCGGACTTTGATGGGGATCAAATGGCTGTTACCTACCTTTATCCTTGG  
AAGCTCAGGCGGAAGCCCGTTTACTTATGTTTTCTCATATGAATCTCCTGTCTCCCGCTATTGGAGATCCTATTTGCGTG  
CCAACCAAGACATGCTTATCGGACTTTATGTATTAACGATTGGAAACCGTCTAGGTATTTGTGCAAATAGATATAAT--  
-----AGTTGC-----GGAAC-----TCTCAAATAAAA---AAAGTAAACTACAAT-----

AATAACAATTATTATAAGTATACGAAAGATAAAGAACCCATTTTTCTAGTTCCTATGATGCACTGGGAGCTTATAGACA  
AAAACGAATCGGTTTAAACAGTCCCTTGTGGCTC-----CGATGG---AAACTA-----  
GATCAACGCATCGTTGGGTCA-----  
AGAGAAGTTCGGATTGAAGTTCAATATGAATCTTTTGGGACTTATCATGAGATTTATGCCACTATCTAGTAGTGGGAAA  
TAGAAAAAAGAAATCCGTTCTATATACATTCGAACCACTCTTGGTCATATTTCTTTTTATAGAGAAATAGAGGAAGCCA  
TACAAGGATTTAGTCGGCCTAT-----  
-----ATGGCAGAA---CGGGCCAACCTGGTCTTT--

CATAATAAAGAGATAGACGGAACTGCTATGAAACGGCTTATTAGCAGATTAATAGATCATTTCGGAATGGGATATAACATC  
CCATATACTGGATCAAATAAAGACTCTGGGCTTCCATCAAGCCACTACTACATCGATTTCTTTAGGAATCGAGGATCTTT  
TAACAATACCCTCTAAAGGATGGTTAGTCCAAGACGCGGAACAACAGAGTTTTCTTTGGAGAAAACACTATTATTATGGA  
GCTATACACGCGGTAGAAAAATTACGCCAATCCGTTGAGATATGGTATGCTACAAGTGAATATTTGAAACAAGAAATGAA  
TTCGAATTTTCGAATAACGGATCCTTCTAATCCAGTCTATCTAATGTCTTTTTTCAGGAGCCAGAGGAAATGCATCTCAGG  
TACACCAATTAGTAGGTATGAGAGGGTTAATGGCGGATCCTCAAGGACAAATGATTCAATTTACCTATTCAAAGCAATTTA  
CGCGAGGGACTTTCTTTGACAGAATATATAATTTCTGCTACGGAGCCCCGAAAAGGGGTTGTAGATACTGCTGTACGAAC  
AGCGGATGCTGGCTATCTTACACGTAGACTTGTGGAAGTAGTTCAACATATTATTGTGCGGTAGAAGAGATTGTGGTACTA  
TCCAAGGTATTTCTGTGAGTCCTCAA-----AATGGG-----  
-----ATGACGGAAAAACTTTTTGTCCAAACA-----  
CTAATTTGGTTCGTGATTAGCAGACGATATATATATTTGGTTCCAGCATGCATTGCTTCTCGAAATCAAGATATTGGAATTGG  
ATTAGTCAATCGATTATAACTGCCTTTCGAGCACAACCGTTTTCGAGCACAACCAATATATATTAGAACCCCTTTACTT  
GCCGGAGCACATCTTGGATCTGTCAATTATGTTATGGGCGGAGTCCCACT-----  
CATGGGGATCTGGTTCGAATTGGGGGAAGCTGTAGGTATTATTGCGGGTCAATCAATTGGGGAGCCGGGGACTCAATTAAC  
ATTAAGAACTTTTCATACTGGTGGAGTATTCACAGGGGGTACTGCCGACCTTATACGATCCCCCTCGAATGGAAAAATCC  
AATTCAT-----  
GAGGATTTGGTTACCCCCACACGTACCCGTCATGGGCAGCCTGCTTTTTCTATGCTATATAGACTTGCATGTAACATTTCA  
GAGTCAGGATATTCTACATAGTGTGAATATTCGGTTAAAAAGCTTGATTCTAGTGCAAAATGATCAATATGTAGAATCTG  
AACAAGTAATTGCGGAGATTTCGTGCCGGAACGTCCACTTTGCAT-----  
TTTAAAGAAAAGGTACAAAAGCATATTTATTCCGAATCAGACGGGGAAATGCCTGGAGTACTGATGTT-----  
TACCAT-----  
GCGCCCGAATATCAATATGGTAATCTTCGTGCGATTACCAAAAACAAGCCATTTATGGATATTGTCAGTAAGTATG-----  
-TGCAGATCCAGT-----ATAGCATCTTTTTTCGTGCACAAGGATCAAGATCAAATGAATACTTATTCTTTT-----  
TCTGTT---GATGGAAGATATATCTTT-----GACTTC-----TCAATGGCTAATGATCAA-----  
-----  
-----GTAAGCCATAGACTGTTG-----GATACT---TTTGGTAAA-----  
-AAAGATAGAGAAATT-----CTT-----GATTAT---TTA---ACGCCA-----GATCGAATCGTGTTC AAC-  
-----GGTCATTGGAATTGTTTCTATCCTTCCATTCTTCAAGATAATTCAGAT-----  
TTGTTGGCGAAAAAGCGAAGAAATAGGCTCGTCGTTCCATTACAA-----TATCATCAAGAA-----  
CAAGAAAAAGAGCGAATA---TCCTGTTTG-----  
GGTATTTCAATGGAAATACCCTTTATGGGTGTTTTACGTAGAAATACTATTTTTGCTTATTTTTGACGATCCACGATACAG  
AAAAGATAAAAGGGGTTTCAGGAATTGTTAAATTTAGATATAGGACCCTGGAGGAAGAATATCGGACCCAAGAGGAAGAGT  
ATAGGACTCGAGAGGAAGAATATCGG-----  
ACTCGAGAGGAAGACTCAGAAGACGAATATGAGAGCCCAGAGAACAAATATAGGACCCGAGAGGGAGAGGGCGAATATAA  
AATCCTAGAAGACGAATATAGGACTCTAGAGGACGAATATGAA-----  
-----  
ACCCTAGAAGATGAATATGGGATCCTAGAGGACGAATATAGGACTCTAGAGAAAGACTCAGAGGAAGAATATGGGAGCCT  
AGAGAACAAATATAGGACTCGAGAGGGAGAGGGCGAATATGAAATCCTAGAGGAAGAATCAGAAGAAGAATATGGGAGCT  
CTGAAGATGGCTCAGAGAAGGAATATGGGACTTTAGAAGAAGACTCA-----  
GAAGAAGACTCAGAGGAAGACTCAGAAGACGAATATGGGAGCCCGGAGGAAGATTCTATCTTAAAAAAGAGGGTTTT--  
-ATTGAGCATCGAGGAACAAAAGAATTTAGTCTAAAATAC-----  
CAAAAAGAAGTAGATCGGTTTTTTTTTTCATTCTTCAAGAACTGCATATCTTGCCGAGATCCTCATCC---  
CTAAAGGTACTTGACAATAGTATTATTGGAGTCGATACACAACCTCACAAAAAATACA-----  
AGAAGTCGACTAGGTGGATTGGTCCGAGTGAAGAGAAAAAAGCCATACA---  
GAACTCAAAATCTTTCCGGAGATATTCATTTTCTGAAGAGGCGGATAAG-----ATATTA-----  
GGTGGCAGTTTGATA-----CCACCAGAAAGAGAAAAA---GAT-----TCTAAGGAATCA-----  
AAAAAAGG-----AAAAATTGGGTTTATGTTCAACGGAAAAAATTTCTCAAAAGCAAG-----  
-----  
-----

Acorus

AAAAAGTATTTTGTGTTGGTCCGACCCGTAGCCACATATGAAATAGCAGATGGGATCAAT-----  
TTAGCAACGCTTTTCCCTCAGGATCTATTGCAGGAAAGGGATAATGTTCAACTTCGAGTTGTTAATTATATCCTTTATGG  
AAATGGCAAACCAATTCGAGGAATTTCTCAC-----  
ACAAGTATTC AATTAGTTCGTA CTGTTAGTATTGAATTGGGACCAAGAA-----CAAATGGT---TCTATA-----

-GAA---

GGTGTTCGTGCTTCCTTTGTTGAAGTAAGGGCAAACGATCTTATTAGAGATTTTCATAAGAATTGAGTTATGCAAGTCCGC  
TATTTTGTAT-----ACC---GGAAAGAGGAAGGATATCGCAGGTTTCCAGGATTGATCCACGAT-----  
AATGTATCGGATCGCACAAATATC---AATCCTGTTTAT-----TTGAAGGAT---AAGATT-----  
-CCATCATTTATTCAACAT-----CAAGGGACT-----  
GTTGGTACGTTGTTGAATCGAAATAAGGAATGCCAA-----  
TCTTTGATTCTTTTGTGCATCATCTAATTGTTTTCGAATTGGT-----CCATTT-----AATGGTTCA---  
AAATATCAC-----AATGTGCCAAAA--GAATCAATT-----AAAGAG-----

-----GATCCTATAATTCCAATT-----  
AGAGATTCGCTGGGTCTTTTAGGTACTACTGTACCAAAAATTGCGAATTTTTTTTAT---TTATCT---  
TACCATGTAATAACTCATAATCATATC---TTGTTAACTAAATATTTGCTACGTGACCAT-----  
TTAAAACAGGCTTTCCAA-----GTACTT-----

AGATATTGTTTAAATGGATGAAAATAGGAGAATTTATAATCCCGATCCGTGCAGTAACATCATTTTTAATGCATTTCGATTT  
GAATTGGCGCTTTCTCCATCACGAT-----

-----TATTCTGAAGAG---ACATCCACA-----  
ATACTTAGCCTTGACAATTTGTTTGTGAA-----AATGTATGTCTATTT-----AAACACGGACCA-----  
CAGATAAAA-----  
TCGGGTCAAGTTATAATTGTTTCATGTTGACTCCTTTGTAATAAGAGCAGCCAAGCCGTATTTGGCCACTCCAGGAGCAAC  
TGTTTCATGGCCATTATGGAGAAATACTTTACGGAGGAGATACATTAATTACATTTATATATGAAAAATCAAGATCTGGTG  
ATATAACG---

CAGGGTCTTCCAAAAGTAGAACAAAGTGTTAGAAGTACGTTCAATTGATTCCATATCGACGAACCTCGAAAAAGGGTTGA  
AGGTTGGAAC---  
GAACATATAACAAAAATTTCTTGAATTCCCTGGGGATTCTTGATCGGGCGCCGAGTTAACCATAGCGCAAAGTCGTATCTC  
TTTGGTTAATAAGATCCAAAAAGTTTATCGATCTCAGGGGGTGCAGATTCATAATAAGCATATAGAGATTATTGTACGTC  
AAATAACATCAAAAAGTGTGGTTTCAGAAGATGGAATGTCTAATGTTTTTACCAGGAGAACTTATCGGATTGTTGCGG  
GCGGAACGAACAGGTGCGCTTTGGAAGAAGCGATCTGTTTACGACCAATCTTATTGGGAATAACAAGAGCGTCTTTGAA  
TACTCAAAGTTTCATATCCGAAGCGAGTTTTCAAGAAACTGCTCGAGTTTTGGCAAAGCGGCTCTACGGGGTTCGTGTTG  
ATTGGTTGAAAGGCCTGAAAGAGAACGTTGTTCTAGGGGCGATGATACCCGTCGGTACGGGATTC---  
AAAGCATTAGTACACCGGTCA-----AGAAAACCCAACAACATTCAT-----TTGGAA-----ATCAAA--  
-----AAGAATAATCTA-----TTTGAGGGGCAAGTGGGAGATGATATTTTGTCTACCACAGA-----  
GAATTATTT-----GGTTCTTGCGGCCCAAAT-----AATTTCCATGATACATCAGAACAGTCA-----  
-----TTTATG-----AAATTTTCATGATTCC-----

ATGACAAAAAGATATTGGAACATCAATTTGGAAGAGATGATGGAAGCAGGAGTGCATTTTCGGTACCGGTACTAGGAAATG  
GAATCCTAGAATGGCACCTTACATTTCTGCA-----

AAGCGTAAAGGTATTTCATATTACAAATCTTACTAGAACTGCTCGTTTTTTATCAGAAGCCTGTGATTTACTTTTTGATGC  
AGCAAGTGGGGGAAAACACTTCTTAATCGTTGGTACCAAAAAGAAAGCAGCTGATTCAGTAGCATCGGCTGCAATAAGGG  
CTCGGTGTCATTATGTTAATAAAAAATGGCTTGGTGGTATGTCAACGAATTGGTCCACTACAGAAACGAGACTTCAAAAT  
TTTAGGGACTTAAGAGCAGAACAAAAGGCTGGGAAAATCGACCGTCTCCCGAAAAGGGATGCAGCAATGTTGAAGAGACA  
ATTATCTACCTTGCAAACATATCTGGGTGGGATCAAATATATGACGGTTTTACCTGATATTGTAATCATCGTTGATCAGC  
AAGAAGACTATACGGCTCTTCGAGAATGTGTCATTTTAGGAATTCGACTATTTGTTAATCGATACAAATCTGACCCG  
GATCTCGCAGACATTTTCGATTTCCCGCAACGATGACGCTATAGCTTCAATCCGATTGATTCTTAACAAATTAGTATTCGC  
AATTTGCGAGGGTTCGTTCTAGCTAT-----ATAAGAAAT-----

-----ATGGGACAAAAATAAATCCACTTGGTTTTAGACTTGGT---  
GCAACCCAAAGTCATCTTTCCCTTTGGTTTCGCACAACCAAAA---  
AGTTATTCTATGGGTTTACAGGAAGATGAAAAAATACGGGAGTGTATCAAGAATTATGTACAA---AAA-----  
AACCCGAGACTGTCTTCA-----  
-----GGATTGGAAGGA-----

ATAGCGCGTATAGAAATTAATAAAGAATCGATCTGATCCAGGTCATAATCTATATCGGATTTCCCAAAT-----

-----TTATTCATAGAGGGTCTGAACGCAA-----GGAATC-----  
AAAGAATTACAGATGAGTGTACAAAAAAGATTA---  
AATTCTGTGAATCAGAGACTCAACATTGCTATCGCAAGAATTTCAAACCTTATGGGCAACCCAATATTCTTGCTGAATA  
TATAGCTTTACAACATAAAAAATAGAGTTTTCGTTTTCGAAAAGCAATGAAAAAAGCTATTGAATTGACTGAACAAGCAGATA  
CAAAAGGA---ATTCAAATTCAAATCGCAGGACGTATCGATGGAAAA-----  
GAAATTGCACGTGTGCAATGGATAAGAGAAGGTAGGGTCCCTACAAACCATTTCGAGCTAAAATTGATCATTGTTTTCCA  
TAAAGTTCAAATCTATGGGGTATTAGGCATAAAAAATTTGGATATTTGTAGACGAGGAA---  
ATGTCTCGCTACCGAGGGCCTCGTTTTAAAAAAAATACGCCGTCTGGGGGCTTTACCCGGACTAACTAGT-----  
AAAGGAACT-----  
AGACCCGGAAGTGATCTTAGAAATCAATTTCTGTTCTGGT-----AAAAGA---  
TCCCAATATCGTATTCGTCTTGAAGAAAAACAGAAATTGCGTTTTTCATTATGGTCTGACAGAGCGACAATTACTTAGATA  
TGTTTCATATCGCCGAAAAGCCAAAGGATCAACAGGTCAGGTTTTACTACAACACTACTT  
Amborella

-----  
AAAAAGTATTTTGTTCAGTCCGACCCGTAGTGACATATGAAATCGCCGATGGGATAAAT-----  
CTAGCAACGTTTTTTTCCCCAGGATCTGTTGCAGGAAAAGAATAATTTGCAACTACGAGTTGTCAATTATATTCTTTATGG  
AGATGGCAAACCCATTTCGAGGAATTTTTTAC-----  
ACAAGCATTCAATTAGTTCCGACTTGCTTAGTATTGAATTGGGATCAAGAC-----CGGGCTGGT---  
TCTATAGAAGAAGAA---  
GAGGCTTATACTTCCCTCGCTGAAGTAAGGGTAAACGATCTGATTCGAAATTTATAAGAATTGATTTGGTGAAGTCTCC  
TATTTCTGCT-----ACT---GGAAAAGAGAATGATATGGCGGGTTCAGGATTGATTCCTAAT-----  
AATGGATCAGATCGCATCAATACC---AATCCTTTTTTT-----TCCAAGGCG---AAGACT-----  
-CAATCACTTAGCCAACAT-----CAAGGAACT-----  
ATTTCGTACATTGCTGAATAGAAATAAGGAAGGCCAGGGCGAATCTCTTATGGTTTTGTCATCATCCAATTGTTCTCGAAT  
TGGT-----CCATTG-----AATGGTTCG---AAATATCAC-----AATGTGACAAAA---  
GAATCAATT-----CAAGAG-----

-----GATCCCATGATTTCAATT-----  
-----AGGAATTCGTTGGGTCCGTTAGGGACT---GTACCTAACATTTTGAATTTT---TCC---TCATCT---  
TATCATTCAATAACTCATAATGAGATC---TTGTTCAATAAATATTTACTACCTGACAAT-----  
TCAAGAGAGACTTTTCTA-----GTACCT-----

-----  
AAATCTTATTTTATGATGAAATAGAAGGATTTATAATCTTGATCCATGCAGTAACATCATTTTGACTCCATTCAATTT  
GAATTGGTGCTTTCTCCATCACGAT-----  
-----TATTGGGAAGAT---ACATCAACA-----  
ATAATTAGCCTTGGACAGTTTTCTTTGTGAA-----AATATATGTATATCC-----AAAGACGGACCA-----  
TGCGTAAAA-----  
TCTGGTCAAATTATAATTGTTTCATGTTGACTCTTTAGTAATAAGATTAGCTAAGTACCATTTGGCTACCCGCGGAGCAAC  
CGTTTCATGGTCATTATGGAGAAATCCTTTACGAGGGGAGATACATTAGTTACTTTTATATATGAAAAATCAAGATCTGGTG  
ATATAACT---  
CAAGGTCTTCCAAAAGTTGAACAAGTGTTAGAAGTTCGTTTCGATTGATTCAATATCGATGAACCTAGAAAAGAGGGTTGA  
AGGCTGGAAC---  
GAACGCATAACAGGATTTCTTGGAAATCCCTGGGAATCTTTATTAGTGCTCAGCTAACCATAGTGCAAAGTCGTATCTC  
TTTGGTTAATAAGATCCAAAAGGTTTATCGATCCCAGGGGGTGCAGATCCATAATAGGCATATAGAACTATTGTACGAC  
AAATAACATCAAAGTCTTGGTTTTCAGAAGATGGAATGTCTAATGTTTTTCCACCCAGAGAATAATCGGATTGTTGCGA  
GCAGAAAAGAAATAGGTCTGTGCTTTGGAAGACGATATATGTTACCGAGCTATTCTATTGGGAATAACGAGGGCATCTCTGAA  
TACTCAAAGTTTTCATATCAGAAGCGAGTTTTCAAGAAACCCTCGGGTTTTAGCGAAAGCCGCTCTCCGAAGTCGTATTG  
ATTGGTTGAAAGGCCTGAAAGAGAATGTTGTTCTGGGGGGGATGATACCTGTTGGTACCGGATTC---  
AAAGGATTCGTTCCACTCC-----AGGGAACACAACAACATTTCT-----TTGGAA-----ATAAAA---  
-----AAGAAGAATCTA-----TTCGATGGGAAGATGAGA---GATATTTTGTCTACCACAGA-----  
GAATTTTGT-----GGTTCGTGCATCCCAAAG-----AATTTTCATGATACATCAGAA-----

-----  
ATGGCAAGAAGATATTGGGACATCAATTTGGAAGAGATGATGGGAGCAGGGGTTTCAATTTGGTTCATGGTACTAGGAAATG  
GAATCCTAGAATGGCACCTTATATCTCTGGA-----  
AAGCGTAAAGGCATTACATTACAAATCTTACTAGAACGGCTCGTCCTTTATCAGAAGCCTGCGATTTAGTTTTTGGATGC  
AGCAAGTAGAGGAAAGCACTTCTTAATAGTAGGTACGAAAGATAAAGCAGCCGATTTCAGTAGCATCAGCTGCAATACGGG  
CTCGGTGTCATTATGTCAATAAAAAATGGCTTGGTGGTATGTCAACGAATTGGTCCACTACAGAAACAAGACTTCATAAG  
TTCAGGGACTTGAGAGCAGAACAAAAGATGGGTCGATTTAAGCGTCTCCCGAAAAGAGATGCGGCAATGTTGAAGAGACA  
ATTATCTCACTTGCAAACATATCTGGGCGGGATCAAATATATGACGGGGTTACCCGATATTGTAATCATCGTGGATCACC  
AAGAAGAATATACGGCTATTAGAGAATGCCTCACTTTGGGTATTCCGACGATTTGTTTAAATCGATACAAATTGTGATCCG  
GATCTCGCAGATATTCCGATTCCAGCCAACGATGACGCTATAGCTTCAATCCAATTGATTCTTAACAAATTAGTATTGGC  
AATTCGTGAGGGTCATTATAGCTAT-----CTAGGAAGTCAT-----  
-----ATGGGACAGAAAATAAATCCACTTGGTTTTAGACTTGGC---  
ACAACCCAAAGTCATCGTTCCCTTTGGTTCGCACAACCAAAG---  
GATTATTCGAGGAATCTACAAGAAGATGAAAAAATACGGGATTGTATCAAGAATTATGTACAA---AAA-----  
CACATGAGAATATCCTCA-----  
-----GGTTCCAAGGA-----  
ATTGCACGTCTAGGGATTCAAAAAAGAATCGATCTCATCCAGGTCACAATCTATATTGGGTCTCCAAT-----  
-----TTGTTAATTGAGGGCCCAACCCGA-----GGAATC-----  
GAAGAATTACGAACAGATGTACAAAAAAGTTA---  
AATTCTATGAACCGGAGACTCAACATTACTATCACAAGAATTGCAAGACCCTATGAACAACCTAATATTCTTGCAGAATA  
TATTGCTCTGCAATTAAAAAATAGAGTTTCATTTGCAAAAAGCAATGAAAAAAGCTATTGAATTAGCTGAACAAGCAAATA  
CAAAGGGG---ATTCGGGTACAAATTGCGGGGCGTCTGAACGGAAAA-----  
GAGATTGCCCGTGTGCAATGGATCAGAGAAGGCAGGGTCCCTACACACTATTTCGAGCTAAAATTGATTATTGTTCTTA  
TATGGTTCAAATCTACGGGGTATTAGGGATCAAATTTGGATATTTGTAGATGAAGAA---  
ATGTCTCGTTACCGAGGACCTCGTTTCAAAAAAATACGCCGTCTGGGGGCTTTACCGGGACTAACTAGT-----  
AAAAGACCT-----  
AGATCTGGAAGTGATCTTAGAAAACCAATCCCCTTCTGGA-----AAAAGA---  
TCTCAATATCGTATTTCGTTTAGAAGAAAAACAGAAATTGCGTTTTTCATTATGGTCTGACGGAGAGACAATTACTTAGATA  
TGTTTCGTATCGCCGAAAAGCCAAAGGGTCAACAGGACAGGTTTTACTGCAACTACTC  
Arabidopsis -----  
-----  
AAAAAGTTTTTTGTTTTGGTGCGGCCCGTAGCCACCTATGAGATAGCGGACAGTATAAAT-----  
TTGGCAACACTCTTCCCACAAGATCTCTTTCCGGAAAAGGATAATATTCAACTTCGAGTTTTCAACTATATCCTTTATGG  
AAATGGCAAACCAACTCGAGGAATTTCTGAC-----  
ACAAGTATTCAATTAGTTTGAACCTTGTTTAGTCTTGAATTGGGAC-----AAAAATTCTTCTCTC-----  
-GAG---  
GAGGTCCGTGCTTTCTTTGTTGAAGTAAGTACAAAGGGTTTTGATTCAAGATTTTATAAGAATTGGCTTAGTGAAATCCCA  
TATTTTCATAT-----ATA---AGAAAAAGGAATAATTCCGCAGATTCGGGATTGATCTCTGCA-----  
-----GATCACATG---AATCCGTTTTATTTCGATTTTCG-----CCCAAGTCT---  
GGCATTCTTCAACAATCACTTAGACAAAAT-----CACGGAAT-----  
ATTCGCATGTTCTTAAATCGAAATAAGGAGTCCCAA-----  
TCTTTGTTAATTTTATCATCATCTAATTGTTTTAGAATGGGT-----CCATTT-----AATCATGTA---  
AAACATCAC-----AATGTGATAAAC---CAATCAATA-----AAAAA-----  
-----  
-----AATACTCTAATTACAATT-----AAAAATTCGTTCGGGCCCTTAGGAACA--  
-GCTACCCCAATTTCAAATTTT---TAT---TCGTTT---TTGCCTTTACTAACTTATAATCAGATC---  
TCTTTAATTAATATTTTCAACTTGATAAC-----TTAAAATATATTTTTCAA-----AAAATT-----  
-----  
AACTCTTATTTAATCGATGAAAACGGAATAATTTTAAATCTCGACCCATATAGTAACGTTGTTTTGAATCCATTCAAATT  
GAATTGGTATTTTCTTCATCAAAAT-----TATCATCATAAT-----  
-----TATTGTGAGGAA---ACGTCCACA-----  
ATAATTAGTCTTGGACAATTTTTTTGTGAA-----AATGTATGTATAGCT-----AAAAAGAACC-----  
CACCTAAAA-----  
TCGGGTCAAGTTTTAATTGTTCAAAGGGATTCCGCAGTAATAAGATCCGCTAAGCCCTATTTGGCTACTCCGGGAGCAAA  
AGTTTCATGGGCATTACAGCGAAATTTCTTTACGAAGGGGATACATTAGTTACATTTATATATGAAAAATCGAGATCCGGTG  
ATATAACC---

CAAGGTCTTCCAAAAGTAGAACAAAGTTTTAGAAAGTCCGCTCGATTGATTCAATATCGTTGAACTTAGAAAAGCGGATTAA  
GGGTTGGAAC---  
AAGTGTATAACAAGAATTTCTTGAATTCCTTGGGGATTCTTGATTGGTGTCTGAGTTAACTATAGTGCAAAGTCGTATTTCT  
TTTGGTTAATAAGATTCAAAGGTTTATCGATCCCAGGGGTCAGATTATAATAGGCATATCGAAATTATTGTACGTC  
AAATAACATCAAAGTTTTGGTTTTCCGAAGAGGGAATGTCTAATGTTTTTTTACCTGGAGAAGTTATTGGATTATTACGA  
GCAGAACGAACGGGGCGTGCTTTAGAAGAAGCAATCTGTTATCGAGCCGTTTTATTAGGAATAACTCGAGCATCTTTGAA  
TACTCAAAGTTTTATATCCGAAGCAAGTTTTCAAGAACTGCTCGAGTTTTAGCAAAGCTGCTCTTCGGGGTCGTATCG  
ATTGGTTGAAAGGCCTGAAAGAAAATGTTGTTCTAGGGGGGTGATCCCCGCGGGACCGGATTCAACAAAGGATTGGTG  
CATTGTTCA-----CGGCAACATACCAACATTATT-----TTGGAA-----AAAAA-----  
ACAAAGAATTTAGCTTTATTTCGAGGGGAGATATGAGA---GATATTTTATTCTACCACAGG-----GAATTTTGT-----  
-GACTCTTCTATTTCCAAA-----

-----  
-----  
-----  
-----  
-----

--  
ATGACAAAAAGATATTGGAACATCGATTTGGAAGAGATGATGAGAGCAGGAGTTCATTTTGGACATGGTACGAGGAAATG  
GAATCCTAGAATGGCACCTTATATTTCTGCA-----  
AAGCGTAAAGGTATTATATTATAAATCTGACTAGAACTGCTCGTTTTTTATCAGAAGCTTGTGATTTAGTTTTTTGATGC  
GGCAAGTAGGGGAAAACAATTCTTAATTGTTGGGACAAAAATAAAGCAGCTGATTTAGTGTCTCGGGGCTGCAATACGGG  
CTCGGTGTCATTATGTTAATAAAAAATGGCTCGGCGGCATGTTAACAAATTGGTCCACTACCGAAAAAGACTTCATAAG  
TTTAGGGACTTGAGAACTGAACAAAAGACAGAGGGATTCAACCGTCTTCCGAAAAGGGATGCAGCTGTGTTGAAGAGACA  
ATTATCTCGCTTGGAACATATCTAGGCGGGATTAAATATATGACGGGATTGCCTGATATTGTAATCATCTCGATCAGC  
AAGAAGAATATACGGCTCTTAGAGAATGTATCACTTTGGGAATTCCAACCATTTCTTTAATCGATACAAATTGTAATCCC  
GATCTCGCGGATATTTCTATTTCCCGCAAATGATGACGCTATAGCTTCAATTCGATTTCATTCTTAACAAATTAGTATTCGC  
AATTTGTGAGGGCCGTTCTAGCTAT-----ATACAAAATTCT-----  
-----ATGGGACAAAAATAAATCCACTTGGTTTTGACTTGGT---  
ACAACCCAAAGTCATCATTCTTTTGGTTTGCAACCAAAAA---  
AAGTATTCTGAAGGTTTAGAAGAAGATAAAAAAATACGAGACTGTATTAAAAATTATGTCCAA---AAA-----  
AATATAAGAATATCCTCT-----  
-----GGTATGGAGGGA-----

ATTGCACGTATTGAAATTCAAAAAGAATCGATCTCATCCAGATCATAATCTATATGGGATTTCTTAA-----  
-----TTATTAATTGAAGATAAAACCCGA-----AGAGTC-----  
GAAGAATTACAGATGAATGTTCAAAAAGAATA---  
AATTGTGTCAATAGAAAACCAACATTGCTATTACCAGAATTTCCAATCCGTATGGGGATCCTAATATTCTTGCAGAATT  
TATCGCTGGACAATTAAAAAATCGCGTTTCTTTTCGAAAAGCAATGAAAAAGCTATTGAATTAAGTGAACAGGCGAATA  
CAAAAGGA---ATTCAAGTACAAATTGCAGGACGTATCGACGGAAAA-----  
GAAATTGCACGTGTTGAATGGATCAGAGAAGGCAGAGTTCCTTTACAAACAATTGAAGCTAAAATTGATTATTGTTTCTTA  
TACAGTTGCAACTATTTATGGGGTTTTAGGAATAAAAAATTTGGATATTTCGTAGACGAAGAA---  
ATGTCACGTTACCGAGGGCCTCGTTTTAAAAAATACGCCGTCTGGGGGCTTTACCGGGACTAACTAGT-----  
AAAAGGCCT-----  
AAGGCAGGAAGCGATCTTAGAAACCAATCACGCTCCGTA-----AAAAA---  
TCTCAATATCGTATTCGTTTAGAAGAAAAACAAAAATTGCGTTTTTATTATGGTCTTACAGAACACCAATTACTTAAATA  
TGTGCGTATAGCCGAAAAGCCAAGGGTCAACAGGTCAAGTTTTACTACAATTACTT

Atropa

-----  
AAAAAGTTTTTTGTTTTAGTTTCGACCTGTCGTACATATGAAATAACGGACGGTATAAAT-----  
TTTGAAACCCTTTTTCCACCGGATCCATTGCAGGAAAGGGATAATGTGCAACTTCGAATTGTCAATTATATCCTTTATGG  
AAATGGCAAACCGATTTCGAGGAATTTCTGAC-----  
ACAAGTATTCAATTAGTTTCGGACTTGTTTAGTATTGAATTGGAACCAAGAC-----AAAAAAGTTCTTCTTGC-----  
-GAA---  
GAAGCCCCTGCTTCTTTTGTGAAATAAGGACAAATGGTTTTGATTTCGACATTTCTAAGAATCAACTTAGTTAAATCCCC  
TATTTCTGAT-----ATC---GGAAAAAGGAATGATCCGTCGGGGTCAGGATTGCTCTCTGAT-----  
AATGGATCAGATTGTACCAATATC---AACCCCTTTTCTTCCATTTATTCTAT---TCCAAGGCA---AAAATT---  
CAACAATCTCTTAACCACT-----CAAGGAAT-----





TACAGTTCGAACTATCTATGGAGTATTGGGCATCAAAATTTGGATATTTCTAGACGAGGAA---  
ATGTGCGGTTACCGAGGACCTCGTTTCAAAAAAATACGCCGCTGGGGGCTTTACCAGGACTAACTAAT-----  
AAAAAGCCT-----  
AGGACCGGAAGTGATCTTAGAAACCAATCGCGTTCCGGG-----AAAAAA---  
TCTCAATATCGTATTCGTCTAGAAGAAAAACAAAATTTGCGTTTTTCATTATGGTCTTACAGAACGACAATTACTTAAATA  
CGTTTCGTATCGCCAGAAAAGCCAAGGGGTCAACAGGTCAAGTTTTACTACAATTACTT

Buxus

-----  
AAAAAGTATTTTGTGTTTGGTTCGACCTGTAGTCACATATGAAATAGCGGACGGAATAAAT-----  
TTAGTAACGCTTTTCCCCCAGGATTTGTTGCAGGAAAGGGATGATGTACAACCTTCGAGTTGTCAATTATATCCTTTATGA  
AAACGGCAAACCAATTCGAGGAATTTCTGAT-----  
ACAAGTATTCGAATTAGTTTCAACTTGTGTTAGTATTGAATTGTGACCAATAC-----AAAAATGGTTCTTCTATG-----  
-GAA---  
GAGATTCATGCTTCCTTTGTTGAAGTAAGAACAAAATGGTCTGATTCGATATTTTTTAAGAATGGACTTAGTGAAATCCCC  
TATTTTCGTAT-----ATC---GTAAAAAGGAATGATCCGTCAAGCTCAGGATTGATCCCCGAT-----  
AATGGATCAGATCGTAACAATATC---AATCCTTTTTATTCCATTTAT-----TACAAGGCA---AGGATT---  
CAACAATCACTTAGCCAACAT-----CAAGGAACT-----  
ATCCGTACGCTGTTGAATAGAAATAAGGAATGCCAA-----  
TCGTTGATAATTTTGTGCATCATCCAATTGTTCTCGAATGCAT-----CCATTC-----AACGGTTTG---  
AAATATCAC-----AATGTGACAAA---GAATCAAGT-----AAAGGG-----  
-----  
-----GATCCCCTAATTCGAATT-----AAGAATTGGTTGGGTCCTTTAGGGACA--  
-GTCCCTAAAATTGCGAATTTT---TAT---TCATTT---TACCATTTAATAACTCATAATCAGATT---  
TTGGTGAATAAATATTTGATACTTAACAAT-----TAAAACAGATTTTTTCAA-----GTACTT-----  
-----  
AAATATTATTTAATGGATGAAAATGGAAGGATTTATAATCCCGATCGATGCAGGAACATCATTTTTAATCCATTCAATTT  
TAATTGGTATTTTCTCCATCACGAT-----  
-----TATTGTGAAGAG---ACATCCACA-----  
ATAATTAGTCTCGACAGTTTATTTGTGAA-----AATGTGTGTATATCC-----AAAAACGGACCA-----  
CACCTAAAA-----  
TCTGGTCAAGTTCTAATTGTTTCATATTGACTCTTTAGTAATAAGATCAGCAAAGCCTTATTTAGCCACTCCAGGAGCAAC  
TGTTTCATGGACATTATGGGGAAATCCTTTATGAAGGAGATACATTAGTTACATTTATATATGAAAAATCGAGATCTGGTG  
ATATAACG---  
CAGGGTCTTCCAAAAGTGAACAAGTCTTAGAAGTGCCTTCGATTGATTCAATATCGATGAACCTAGAAAAGAGGGTTGA  
GGGTTGGAAC---  
GAACGTATACCAAGAATTCCTTGAATTCCTTGGGGATTCTTGATTGGCGCTGAGCTAACCATAGCGCAAAGTCGTATCTC  
TTTGGTTAATAAGATCCAAAAGGTTTATCGATCCCAGGGGGTGCAGATCCATAATAGGCATATAGAAATTATTGTACGTC  
AAATAACATCAAAAGTGTGGTTTTCAGAAGAGGGAATGTCTAATGTTTTTCCACCGGAGAATAATTGGATTGTTGCGA  
GCGGAACGAACGGGGCGCGCTTTGGAAGAAGCGATCTGTTACCGAGCCGCTTATTGGGAATAACAAGGGCATCCCTGAA  
TACTCAAAGTTTCATATCCGAGGCGAGTTTTCAAGAACTGCTCGAGTTTTAGCAAAGCCGCCCTACGAGGTCGGATCG  
ACTGGTTGAAAGGCCTGAAAGAGAACGTTGTTCTGGGGGGACTGATACCTGTTGGTACCGGATTC---  
AAAGTATTAGTCCACCGTTCA-----AGACAACACAACAACATTCCT-----TTGGAA-----ACCAAA--  
-----AGAAGAATATA-----TTCGAGGGGGAAATGAGA---  
GATATTTTGTTCACCACAGAAAATTTAAATTATTG-----AATTATTGCATTCCAAAG-----  
AATTTCCACGATACACCAGAACAATCG-----TTTACA-----GGATTTAATGATTCC-----  
-----  
-----  
-----  
-----

ATGACAAGAAGATATTGGAACATCAATTTGGAAGAGATGATGGAAGCAGGAGTTCATTTTGGTCATGGTACTAGGAAATG  
GAATCCTAGAATGGCACCTTACATCTCTGCA-----  
AAGCGTAAAGGTATTCATATTACAAATCTTACTAGAAGTCTCGTTTTTTTATCAGAAGCTTGTGATTTACTTTTTGATGC  
AGCAAGTAGGGGAAAACAATTCCTAATTGTTGGTACCAAAAATAAAGCAGCTGATTTAGTAGCATCGGCTGCAATAAGGG  
CTCGGTGTCATTATGTTAATAAAAAATGGCTCGGTGGTATGTCAACGAATTGGTCCACTACAGAAACGAGACTTCATAAG

TTCCGGGACTTGAGAGCGGAACAAAAGACGGCGAGACTCGCCCGTCTTCCGAAAAGAGATGCAGCAATGTTGAAGAGACA  
ATTATCTCACTTGCAAACATATTTGGGCGGGATCAAATATATGACGAGGTTACCCGATATTGTAATCATCGTTGATCAGC  
AAGAAGAATATACAGCTATTCGAGAATGTGTCACTTTGGGAATTCCAATGATTTGTTAATCGATACAAATTGTGATCCG  
GATCTCGCAGATATTTCTATTCCAGCGAATGATGACGCTATAGCTTCAATCCGATTAATTCTTAACAAATTAGTATCCGC  
AATTTGTGAAGGTCGTTCTAGCTAT-----ATAAGAAATCGT-----  
-----ATGGGACAAAAATAAATCCACTAGGTTTTAGACTTGGT---  
ACAACCCAAGGTCATCATTCCCTTTGGTTTGACAACCAAAA---  
AGTTATTCCGAGGGTCTACAGGAAGATCAAAAAATACGGGATTGTATCAAGAATTATGTACAA---AAA-----  
AATATGAGAATATCCTCA-----  
-----GGTGCCGAGGGA-----  
ATTGCACGTATAGAGATTCAAAAAGAATCGATCTGATCCAAGTTATAATCTATATGGGATTCCTCAAAG-----  
-----TTGTTAATAGAGGGTAGACCACGA-----GGAGTT-----  
GAAGAATTGCAGATCAATGTACAAAAAGAGTTT---  
AATTCTGTAAACCGAAAACATAACATTGCTATCACAAGAATTGCAAAACCTTATGGACAACCTAATATTCTTGCGGAATT  
TATAGCTGGACAATTAAGAATAGGGTTTCGTTTCGAAAGGCAATGAAAAAGGCTATTGAATTAACCTGAACAGGCAGATA  
CAAAAGGA---ATTCAAATACAAATTGCAGGGCGTATCGACGGAAAA-----  
GAAATTGCACGTGTGAATGGATCCGAGAAGGTAGGGTTCCCTACAAACCATTTCGAGCTAAAATTTATTATTGTTCTTA  
TACAGTTCGAACTATCTATGGGGTATTAGGAATAAAAAATTTGGATATTTGTAGACGAGGAA---  
ATGTCTCGTTACCGAGGGCCTCGTTTCAAAAAAATACGCCGTCTGGGGGCTTTACCGGGACTAACTAGT-----  
AAAAGGCCT-----  
AGAGCCGGAAGTGATCTTAGAAACCAATCGCGTTCCGGG-----AAAAGA---  
TCTCAATATCGTATTCGTCTAGAAGAAAAACAAAAATTGCGTTTTTCATTATGGTCTGACAGAACGACAATTACTTAAATA  
CGTTTCGTATCGCTGGAAAAGCAAAAGGGTCAACAGGTCAGGTTTTACTACAATTACTT  
Calycanthus -----  
-----  
AAAAAGTATTTTGTGGTTTCGACCCGTAGTCACATATGAAATAGCTGATGGGATCAAT-----  
TTAGAAACACTTTTCCCCCAGGATCCCTTGCAGGAAAGGGATAATGTGCAACTACGAGTTGTCAATTATATCCTTTACGG  
AAATGGCAAACCAATTTCGAGGAATTTCTCAC-----  
ACAAGTCTTCAATTAGTTTCAACTTGTTTAGTATTGAATTGGGACCAAGAC-----CGAAATGGT---TCTATA-----  
-GAA---  
GAGGTTTCATGCTTCCCTTTGTTGAAGTAAGGGCAAAATGGGCTGATTTCGAGATTTCTAAAAATTGATTTAGTGAAGTCCCC  
CATTTTGTAT-----AGC---GGAAAAAGAAATGATACGACAAGTTCAGGATTCATCCCCAAT-----  
AATGGATCAGATCGTACCAATATC---AATCCTTTTTAT-----TTCAAGGCG---AGGATT-----  
-CAATCACTTACCCAACAT-----CAAGGAACT-----  
ATTTCGTACGTTGCTGAATAGAAATAAGGAATGCCAA-----  
TCTTTTCTAATTTTGTTCATCATCCGATTGTTCTCGAATTGGT-----TCATTC-----AATGGTTCG---  
AAATCTCAC-----AAAGTGACAAAA---GAATCAATT-----ACAATTAAGAG-----  
-----  
-----GATCCCACGATTCCCATT-----AGGAATTCGTTGGGTCCCTTAGGGACT--  
-GTACCCAAAATTGCGAATTTT---GAT---TCATCT---TACTATTTAATAACTCATAATCAGATC---  
TTGTTAAATAAATATTTGTCACTTGACAAT-----TAAAACAGACTTTCCAA-----GTACTT-----  
-----  
AAATATTATTTAATGGATGAAAATGGGAGAATTTATAATCCCGATCCACGCAGTAACATCATTTTAATCCATTGATTT  
GAATTGGTGTCTTCTCCCTCATGAT-----TATTGTGAGGAG---ACGTCCACC-----  
ATAATTAACCCCGGGCAGTTTATTTGTGAA-----AATGTATGTATATCC-----AAATACGGACCG-----  
CACATAAAA-----  
TCGGGTCAAATTTAATTGTTTCGTTGACTCCTTAGTAATAAGATCAGCTAAGCCTCATTGCGCCACTCCGGGAGCAAC  
CGTTTCATGGCCATTGTGGAGAAATCCTTTACGAAGGAGATACATTAGTTACATTTATATATGAAAAATCGAGATCGGGTG  
ATATAACA---  
CAAGGTCTTCCAAAAGTGGAAACAGGTGTTAGAAGCGCGTTTCGATTGATTCAATATCGATGAACCTAGAAAAGAGGGTTGA  
AGGTTGGAAC---  
GAACGTATAACAAAAATTTCTTGGGATTCCTTGGGGATTCTTGATTGGTGTCTGAGCTAACCATAGCGCAAAGTCGTATTTT  
TTTGGTTAATAAGATCCAAAAGGTTTATCGGTCCCAGGGGTGCAGATCCATAATAGGCATATAGAGATTATTGTACGTC  
AAATAACATCAAGAGTGTGGTTTTCAGAAGATGGAATGTCTAATGTTTTTCCACCGGAGAATAATCGGATTGTTGCGA  
CGGAACGAACCGGGCGTCTTTGGAAGAAGCGATCTGTTACCGAGCTATCTTATTGGGAATAACGAGGGCATCTTTGAA

TACTCAAAGTTTCATATCCGAAGCGAGTTTTCAAGAAACCGCTCGAGTTTTAGCAAAGCCGCTCTACGAGGTCGTATTG  
ATTGGTTGAAAGGCCTGAAAGAGAACGTTGTTCTGGGGGGGATGATGCCTGTTGGTACCGGATTC---  
AAAGGATTAGTGCGCCGTTCA-----AGGCAACACAACAATATTCCT-----TTGGAA-----ATCAAA--  
-----AAGAAAAATCTA-----TTCGAGGGGGAAATGAGA---GATATTTTGTTCACCACAGA-----  
GAATTATTT-----GATTCTTGCATCCCAAAC-----AATTTCCCGGATACATTAGAA-----  
-----  
-----  
-----  
-----  
-----  
-----  
-----

ATGACAAGAAGATATTGGCACATTAATTTGGAAGAGATGATGGAAGCAGGAGTTCATTTTGGTCATGGTACTAGGAAATG  
GAATCCTAGAATGGCACCTTACATCTCCGCA-----  
AAGCGTAAAGGTATTCATATTACAAATCTTACTAGAACTGCTCGTTTTTTGTCAGAAGCCTGTGATTTAGTTTTTGATGC  
AGCAAGTATAGGAAAACACTTCTTAATAGTTGGTACCAAAAAGAAAGCAGCGGATTTCAGTAGCATCAGCTGCAATAAGGG  
CTCGGTGTCATTATGTTAATAAAAAATGGCTCGGTGGTATGTCAACGAATTGGTCCACTACAGAAAACGAGACTTCATAAG  
TTCAGGGACTTGAGAGCCGAACAAAAAGCGGGGAAACTCAACCGTTTTACCGAAAAGAGATGCGGCAATGTTGAAGAGACA  
ATTATCTCACTTGCAAACATATTTGGGCGGAATTAATATATGACGGGGTTACCCGATATTGTAATCATCATCGATCAGC  
AAGAAGAATATACGGCTCTTCGAGAATGTCTCACTTTGGGGATTCCGACAATTTGTTAATCGATACAAATTGTGACCCG  
GATCTCGCGGATATTTTCGATTCCAGCGAACGATGATGCTATAGCTTCAATCCGATTGATTCTTAACAAATTAGTATCCGC  
GATTTGTGAGGGCCGTTCTAGCTAT-----ATAAGAAATTGT-----  
-----ATGGGGCAAAAAATAAATCCACTCGGTTTCCGACTTGGT---  
GAAAACCAAAGTCATCATTCCCTTTGGTTTCGCACAACCAAAA---  
AGTTATTGCAGAGGTCTACAGGAAGATGAAAAAATACGGGATTGTATCAAGATATATGTACAA---AAA-----  
AATATGAGAATATCCTCA-----  
-----GGTTTCGAAGGA-----

ATTGCGCATATAGAGATTCAAAAAAAATGGATCTGATCCAGGTCATAATCTCTATTGGATTCCCAAAT-----  
-----TTTTAATAGAAGGTGGAACCCGA-----GGAATC-----  
GAAGAATTACAGATGAATGTACAAAAGAGGTTT---  
CATTCTGCGAACCGGAGACTTAAACATTGCTATTACAAAGAGTTGCAAAACCTTATGGACAACCTAATATTCTTGCAGAATA  
TATAGCTCGACAATTAAGAATAGAGTTTCTTTTCGAAAGGCAATGAAAAAAGTTATTGAATTAAGTGAACAAGCGGACA  
CAAAAGGA---ATTCAAGTGCAAATTGCAGGGCGTATCGACGGAAA-----  
GAAATTGCACGTGTGCAATGGATCAGAGAAGGCAGGGTTCCCTACAAACCATTTCGAGCTAAAATTGATCATTGTTCCCTA  
TACAGTTCGAACCATATATGGGGTATTGGGCATAAAAAATTTGGATATTTGTAGACGAACAA---  
ATGTCTCGTTACCGAGGGCCTCGTTTCAAAAAAATACGCCGTCTGGGGGCTTTACCGGGACTAACTAGT-----  
AAAAGACCT-----  
AGATCCGGAAGTGATCTTAGAAACCAATCGCGTTCTGGT-----AAAAA---  
TCTCAATATCGTATTCGTCTAGAAGAAAAACAAAATTGCGCTTTTATTATGGTCTGACAGAGCGACAATTGCTTAGATA  
TGTTTCGATTGCCGAAAAGCCAAAGGGTCAACTGGTCAGGTTTTACTACAACACTACT  
Ceratophyllum -----  
-----  
-----

AAAAAGTATTTTGTTCGGTTCGACCTGTAGTCACATACGAAATAGCTGATGGTATAAAT-----  
TTACCAACGCTTTTCCCCCAAGATCTGTTGCAGGAAAGGGATAATATGCAACTCCAAGTTGTCAATTATATCATTTCGGG  
AAATGGCAAACCTAGTCGAGGAATTCCTCAG-----  
ACAAGTATTCAATTAGTACGGACTTGTTTAGTATTGAATTGGGACCAAGAC-----CTAAAAGGT---TCTCTA-----  
-GAA---  
GAAATTCATGCTTCCTTTGTTGAAGTAAGGACAAATGATCTGATTTCGAGATTTATAAGAATTGACTTAGTGAAGTCCCC  
TATTTTCGTAT-----ACC---GGAAAAAGGAATGATACGTGGGGTTCGGGATTAAACCCTGAT-----  
AGTATATCAGATTGTACCAATATC---AATCCTTTTTAT-----TCTAAGGCG---AGGCTT-----  
-CCATCATTACCCAACCT-----AAAGGAACT-----GTTTCGTACCTTG-----  
AGAAATAAGAATATCAA-----TCGTTGATAATTTGTGCATCATCCGATTGTTATCAAATTGGC-----CCATTC--  
---AAGGATTCG---AAATATAACAAGACGACAAACTGTCACAATATTACAAA---GAATTAATT-----  
--AAAGAA-----  
-----  
-----

-----GATTCCCGGTTCCATT-----  
AGCAATTCGTTGGGTCCATTAGGAGCT---GTACCAAAATTTTTGAATTTT---GAT---TCATTT---





GCAACCCAAGGTCATCATTCCCTTTGGTTCGCACAACCAAAA---  
AGTTATTCCAGAGGTCTCCAGGAAGATGAAAAAATAAAGGATTGTATCAAGAATTATGTACAA---AAA-----  
AATATGAGAATATCCTCG-----  
-----GATTACGAAGGA-----  
ATTGCACATATAGAGATTAAAAAAGAATCGATCTGATTGAGGTCATAATCTATATGGGATCAAAAAAT-----  
-----TCGTTAATGTTAATAGAGGGTCCAACACGA-----GGAATC-----  
GAAGAATTACAGATCAATGTACAAAAAGAGTTT---  
CATTCTGCGAACCAGAGACTCAATATTGACATCACAGAAGTTGCAAACCCTTATGGACAACCTAATCTTCTTGCAGAATA  
TATAGCTCGACAATTAAGAAGAGAGTTTCGTTCCGAAAGGCAATGAAAAAACTATTGAATTCGCTGAACAAGCAGATA  
CAAAAGGA---ATTCAAGTGCAAATTCAGGACGCATCGACGGAAAA-----  
GAAATTGCGCGTGTGCAATGGGTGAGAGAAGGTAGGGTCCCCTACAACTATTTCGAGCTAAAATTGATTATTGTTTCTTA  
TACAGTTCGAACATCCATGGGGTATTGGGCATAAAAAATTTGGGTATTTGTAGACGATAAA---  
ATGTCTCGTTACCGAGGGCCTCGTTTCAAAAAAATACGCCGTCTAGGGGCTTTACCGGGACTAACTAGT-----  
AAAAGACCT-----  
AGGTCCGGAAGTGATCTTAGAAACCAATCACGTTTCGGG-----AAAAGA---  
TCTCAATATCGTATTCGTCTAGAAGAAAAACAAAAATTGCGTTTTTATTATGGTCTGACAGAGCGACAGTTACTTAGATA  
TGTTTCGTATCGCTGGAAAAGCCAAAGGATCAACAGGTCAGGTTTTACTACAACACTACTT  
Citrus -----

-----  
AAAAAGTCTTTTGGTTCGACCCGTAGTCACATATGAAATAGCGAACGGTATAAAT-----  
TTAGCAACACTCTTTCCCAGGATCCGCTGCGGGAAAAGGATAATATGCAATTTTCGAGTTGTCAATTATGTCCTTTATGG  
GAAGGGCAAAGCCGCTGGGGGAATTTCTGAT-----  
ACAAGTCTTCAATTAGTTCGGACGTGTTTAGTGTGAATTGGGACCAAGAC-----AACAAAAGTTCTTCCGTC-----  
-GAA---  
GAGGTTTGTGCTTCTTTGTTGAAGTACGTACAAATGGTCTGATTGCAAATTTCTTAAGAATCAACTTAGTGAAATCCAA  
TATTTTCGTAT-----CTC---AGAAAAAGGGATCATCCGTCGGGTTTCAGGATTAATTTCTGAT-----  
AATGGTTCAGCTCGCACCAATAGC---AATCCGTTTTATTCCGTGTTT-----GGCAAGGCA---GGGGTT---  
GAACAATCGCTTAGACAAAAAT-----CAAGGAAT-----  
ATTTCGTACGTTGTTGAATAAAAAATAAGGAATGCCAA-----  
GTTTTGATAATTTTATCATCATCTAATTATTTTCGAATGGGT-----CCATTG-----AACGATGTA---  
AAATATCAC-----AATGTGATAAAA---CAATCAATT-----CCAATTCAAAA-----

-----  
-----GATTGCTAACTCCAATT-----AAGACTTCGTTGGGACCCTTAGGAACA--  
-TTCCTTCAAATTCGAATTTT---TAT---TCATTT---TACTATTTAATAACTCATAATCATATC---  
TCGGTAACTAAATATTTGAAACTTGACAAT-----TAAAACAGCCTTTTCAA-----GTACTT-----

-----  
AAATATTATTTAATGGACGAAACCGGGAAATTTATAATCCTGATACAGATAGTAAGATCCTTTTGAATCCATTTAATTT  
GAATTGGTATTTTCTCCAGCCTAAT-----  
-----TATTGTGAGGAA---ATGTCCCG-----  
ATAATTAGTCTTGGGCAGTTTCTTTGTGAA-----AATGTACGTATAACC-----AAAAGGGGACCA-----  
TACCTAAAA-----  
TCCGGTCAAGTTTTAATTGTTCAAGTAACTCTGTAGTAATACGATCAGCTAAGCCTTATTTGGCTACTCCTGGAGCAAC  
TGTTTCATGGGCATTATGGAGCAATCCTTTACGAAGGGGATACATTAGTTACATTTATATATGAAAAATCGAGATCTGGTG  
ATATAACG---  
CAGGTCTTCCAAAAGTAGAACAGGTGTTAGAAGTGCCTTCGTTGATTCAATATCGATGAACCTAGAAAAGAGAGTTGA  
GGTTTGAAC---  
GCGAGTATAACAAGAATTTCTGGGATTCCCTGGGGATTCTTGATTGGTGCTGAGCTAACTATAGTGCAAAGTCGTATCTC  
TTTGGTTAATAAGATCCAAAAGGTTTATCGATCGCAGGGGGTGCAGATCCATAATAGGCATATAGAAATTATTGTACGTC  
AAATAACATCAAAGTTTTAGTTTCCGAAGATGGAATGTCTAATATTTTTTTACCCGGCGAACTGATTGGATTGTTACGA  
GCGGAACGAATGGGGCGCGCTTTGGAAGAAGTGATCTGTTATCGAGCTATCTTATTGGGAATAACGAGAGCGTCTCTGAA  
TACTCAAAGTTTTATATCCGAAGCAAGTTTTCAAGAAACCACGCGAGTTTTAGCAAAGCTGCTCTCCGAGGTCGTATCG  
ATTGGTTGAAAGGCCTGAAAGAAAACGTTGTTCTGGGGGGGATAATACCAGTCGGTACCGGATTC---  
AAAGGATTAGTCCACTGTTCA-----AGGCAGCATAACAACATTCTT-----TTGGAA-----AGACAA--  
-----AAAGGGAATTTA-----TTCGGGGGGAAATGAGA---GATATTTTCTTACACCACAGA-----  
GAATTATTT-----GACTCGTGCATTTCAACG-----ACTTTCCATGATACATCAGAGCACAAT-----  
-----TGCTTA-----GAGGGTTTAAATGAGTCCTAGGAGCGAATTCCTT-----





ATAATAAGTCTTGGACAGTTTATTTGTGAA-----AATGTGTGTATAGCT-----AAAAATAGACCA-----  
 CACCTAAA-----  
 CCGGGGCAAGTTATATTTGTTCAAGTTGACTCCGTAGTAATACGATCAGCTAAGCCTTATTTGGCCACCCCGGGAGCAAC  
 TGTTTCATGGCCATTATGGGGAAACCCTTTACGAAGGAGATATATTAGTTACATTTATATATGAAAAATCGAGATCTGGTG  
 ATATAACG---  
 CAGGGTCTTCCAAAAGTGGAAACAAATATTAGAAGTGCCTTCGATTGATTCAATATCGATGAATCTACAAAAGAGGATTGA  
 GGGTTGGAAC---  
 AAATGTATAACAAGAATTCTTGGAACTCCTTGGGGATTCTTGATTAGTGTGCTGAACTAACTATAGTGCAAAGTCAGATCTC  
 TTTGGTTAATAAGATCCAAAAGGTTTATCGATCCCAGGGGTACAGATTCATAATAAGCATATAGAAAATTATTGTACGTC  
 AAATAACATCAAAGTGTGATTTTCAGAAGACCGGAATGTCTAACGTTTTTCACCCGGCGAACTAATTGGATTGTTGCGA  
 GCAGAGCGAATGGGCGCGCTTTAGAAGAAGCGATCTGTTACCGAGCCGTCTTATTGGGAATAACAAGGACATCTCTCAA  
 TACTCAAAGTTTCATATCTGAAGCGAGTTTTCAAGAACTGCTCGGGTTTTAGCAAAGCCGCTCTTCGTGGGCGTATCG  
 ATTGGTTGAAGGGTCTGAAAGAGAAGCGTAGTTTTGGGGGAATGATACCCGTTGGGACCGGATTC---  
 AAAGGATTAGTGAAACCTTCA-----AAACAACATAACAAGGCTCTC-----TTGGAA-----ACCAA--  
 -----AAAAAGAATCTA-----TTCGAGGGGGAATGAGA---GATATTTTGTTCATCACAGA-----  
 AATTTTTTTT-----GATTCTTTCTTTTAAA-----AAATTCCATGATCCATCAGAACAATCT-----  
 -----TTTATA-----GGATTTAATGATTCA-----  
 -----  
 -----  
 -----  
 -----  
 -----  
 ATGACAAGAAGATATTGGAACATCAATTTAGAAGAGATGATGGAGGCAGGGGTTTCATTTTGGCCATGGTACTAGGAAATG  
 GAATCCTAAAATGGAACCTTATATCTCTGCA-----  
 AAGCGTAAGGGTATTACATAAATACTTACTAGAAGTCTGCTGTTTTTTATCAGAAGCTTGTGATTGTTGCTTTTGTATGC  
 GGGAAAGTCGAGGAAAAACAATTTTAAATTGTTGGTACCAAAAATAAAGCAGCAGATTCAGTAGCATGGGCTGCAATAAGGG  
 CCCGGTGTGCTATTATGTTAATAAAAAAATGGCTCGGCGGTATGTTAACGAATTTGGTCCACTACAGAAAACGAGACTTCATAAG  
 TTCAGGGACTTGAGAAATGGAACAAAAACAGGGAGACTTAATCGTCTTCCAAAAAGAGATCGAGCTATGTTGAAAAGACA  
 ATTATCTCGTTTTGCAACATATCTGGGCGGGATTAATATATGACAGGGTTACCCGATATTGTAATCATCATTGATCAGC  
 ACGAAGAATATACGGCCCTACGAGAGTGTATTACTTTGGGAATTCACAACAATTTGTTTAAATCGATACAAATTGCGACCC  
 GATTTAGCAGATATTTTCGATTCCGGCGAATGATGACGCTATATCTTCAATCCGATTAATTCTTAACAAATTAGTATTCGC  
 AATTTGTGAGGGTCGCTCTAGCTAT-----ATAAGAAATCCT-----  
 -----ATGGGACAAAAATAAATCCACTTGTTTTAGACTTGGT---  
 ACAACCAAGGTCATCATTCTTTTGGTTTACACAAGCAAAA---  
 AATTATTTCTGAGGGTCTACAAGAAGATCAACAATAAGAAATTGTATTAATAAATTATGTTCAA---AAG-----  
 AATACGAAAATATCCTCT-----  
 -----GGGGTAGAGGGA-----  
 ATTCACGTATAGAGATTCAAAAAGAATCGATTTGATCCAAGTAATAATTTTTATGGGATTCCCAAAA-----  
 -----CCATTACTAGAAAATCAACCACGA-----GGAATC-----  
 GAAGAATTACAGACGAATCTACAAAAAAAATGT---  
 AATTCTGTGAACAGAAAATTTAATGCTATACAAAAATTGCAAAACCTTATGGAAACCCTAATATTCTTGCAGAATA  
 TATAGCTGGGCAATTAAGAATAGAGTTTCATTTGAAAAGCAATGAAAAAGGCTATTGAATTAECTGAACAAGCAATA  
 CAAAGGGA---ATTCAAGTCCAAATTGCAGGTGCTATCGACGGAAAA-----  
 GAAATTGCACGCGTGAATGGATTAGAAGGGGTAGGGTCTCTACAAACCAATTGAGCTAAAATTGATTATTGTTCTTA  
 TACAGTTCGAACTATCTATGGTGTATTAGGCATAAAAAATTTGGATATTTATAGACGAGGAA---  
 ATGTCGCGTTACCAGGACCTCGTTTTCAAAAAATACGCCGTCTGGGAGCTTTACCAGGACTAACTAAT-----  
 AAAAAAGCCT-----  
 AGAGCTGGAAATGATCTTAGAAACCAATTACGTTTCGGGA-----AAAAAA---  
 TCTCAATATCGTATTCGACTAGAAGAAAAACAAGTTGCGTTTTTATTGTTTACAGAACGACAATTACTTAAATA  
 TGTTCTGATCGCCGAAAGCCAAGGGTCAACAGGCCAAGTTTTACTACAATTAATT  
 Cucumis -----  
 -----  
 -----  
 AAAAAGTATTTTGTGTTTTGTTTCGACCTGTAATCATATATGAACTAGCCGACGGTATAAAT-----  
 TTAGTCAAACTTTTCCACAGGATCTATTGCAAGAAAGGGATAATCTGGAGCTTAGAGTTGCCAATTATATACTTTATGG  
 AAATGGCAAACCAATTTCGGGAATTTCTGGC-----  
 ACAAGCATTCAATTAGTTTCGACTTGTTTTATTGTTGAATTGGGACCGAGAC-----AAAAAAGCTCTTCTATC-----



GAAGAATTACAGATTAATGTACAAAAAGAATTC---  
AATTCTGGGAACCGAAAACCTCAACATTGCTATTACAAGAATAGGAAACCCTTATGGACACCCTAATATTCTCGCAGAATT  
TATAGCCGGACAATTAAGAATAGAGTTTCATTTTCGCAAAGCAATGAAAAAGCTATTGAATTAACGAACAGGCGGGTA  
CAAAGGGA---ATTCAAGTACAAATTGCCGGACGTATAGACGGAAAA-----  
GAAATTGCACGTGTCTGAATGGATCAGAGAAGGACGGGTTCTCTACAAACCATTTCGAGCTAAAATTGATTATTGTTGCTA  
TCCAGTTCGAACTATCTATGGGATATTAGGCATAAAAAATTTGGATATTTGTAGACGAGCAA---  
ATGTGCGGTTACAGAAGGCCTCGTTTCAAAAAAATACGCCGTCTGGGGGCTTTACCGGGACTAACTAGT-----  
AAAAGGCC-----  
AAAACCGGAAACGATCTTAAAAACCAATCGCGTTCGGT-----AAAAA---  
TCTCAATATCGTATTCGTTTAGAAGAAAAACAAAAATTGCGTTTTTCATTATGGTCTTACAGAACGACAATTACTTAAATA  
CGTTCGTATCGCCGGAAAAGCCAAAGGATCAACGGGTCAAGTTTTACTACAATTACTT

Daucus

-----  
AAAAAGTATTTTGTGGTTCGACCTGTAGTCACATATGAAATAACAGACGGTATAAAT-----  
TTAGTAAGACTTTTTCCCGGATCTGTTGCAGGAAATGGATAATGTGCAACTTCGAGTTGTCAATTATATCCTTTATGG  
AAACGGCAAACCAATTCCGGAAATTTATAAC-----  
ACAAGTATTCAATTAGTTAGGACTTGTTTAGTATTAATTTGTACCCAAGAC-----AAAAAAGTTCTTATATC-----  
-GAA---  
GAGACCCGTAATTCCTTTGTTGAAATAGGGATAAATGGTTTTGAGTCGAGATTTTATAAAAAATAGACTTAGTGAAATCCCC  
TATTTTCGTAT-----ACC---GCAAAAAGGAATGATCCTTCGCGTTCAGGATTGATCTATGAG-----  
AATGGATCAGATTGCACCAATATC---AATCCGTTTTCTCCCGTTTTTTCTACTATTCCAACGCA---AGGATT---  
AAAGAATCCCTTAATCAAAAC-----CAAGGCACT-----  
ATTCATACATTGTTCAATAGAAATAAGGAATACCAA-----  
TCTTTGATAATTTTGTATCCTCTAATTGTTTTCGAATGGGC-----CCATTC-----AACAAATGTA---  
AAATATCAC-----AATGTGATAAAA---GAATCAATT-----AAAAA-----

-----GATCCCCAATTCCAATT-----AGGAATTTGTTGGGCCCTTTAGGAACA--  
-GCCCTTAAACTGCGAATTTT---TAT---CCATTT---TCCCATTTAATAACTTATAATCAGATC---  
TTGGTAATTAACTATTTGCAACTTGACAAC-----TTAAAACAGACCTTTCAA-----GTAATT-----

-----  
AAATATTTTTTAATGGATGAAATTGGTAAAATTTATAATTATGATTTGTGCAGTAACATTATTTTGAATCCATTCAATTT  
AAATTGGTATTTTCTTCAGCACAAT-----  
-----TATTGTGAAGGG---ATGTCTACA-----  
ATAATGAGTCTTGGGCAGTTTTATTTGTGAA-----AATGTATGTATAGCC-----AAAAATGGACCA-----  
CATCTCAA-----  
TCGGGTCAAGTTCTAATTGTTAAAATGGATTCTGTAGTAATACGATCCGCTAAGCCTTATTTAGCCACCCCAGGAGCAAC  
GGTTCATGGCCATTATGGGGAAATCCTTTACGAAGGAGATACATTAGTTACATTTATATATGAAAAATCGCGATCTGGTG  
ATATAACG---  
CAGGGCCTTCCAAAAGTGGAACAGGTATTAGAAGTGCGTTCGATTGATTCAATATCGATGAATCTCGAAAAGAGGGTTGA  
GGTTGGCAT---  
GAATGTATAACAAGAACTCTTGGAAATCCTTGGGGGTTCTTGATTGGTGCTGAGCTAACTATAGTGCAAAGTCGTATCGC  
TTTGGTTAATAAGATCCAAAAGGTTTATCGATCCCAGGGGGTGCAGATCCATAATAGACATATAGAAATTATTGTACGTC  
AAATAACATCAAAAAGTGTGGTTTTCAGAAGATGGGATGTCTAATGTTTTCTTACCCGGAGAATTAATTGGATTGTTACGG  
GCGGAACGAATGGGGCGTGCTTTGGAAGAAGCAATCTGTTACCGAGCCGTCTTATTGGGAATAACAAAAGCATCTCTGAA  
TACTCAAAGTTTCATATCCGAAGCGAGTTTTCAAGAACTGCTCGAGTTTTAGCAAAGCTGCTCTACGGGGTTCGTATTG  
ATTGGTTAAAAGGCCGTAAGAGAGAACGTTGTTCTGGGGGGGATGATACCCGTTGGTACCGGATTC---  
GAGGGATTGGTGCCTCTTCG-----AGACAACATACCAACCTTTCC-----TTGGAA-----ACCAA--  
-----AATAATAATATA-----TTTGGGGGGGAGATGAGA---GATATTTTGTTCACCACAGA-----  
AAATTTTTT-----GATTCCTGCTTTTCAAAG-----AATTTCCATGATACATCAGAACAATCA-----  
-----TTTATAGGTATAGGATTTAATGATTCC-----  
-----  
-----  
-----  
-----

ATGACAAAAAGATATTGGAACATCGATTTGGAAGAGATGATGAAGGCCGGAGTTCATTTTGGACATGGTACTAGGAAATG  
GAATCCTAAAATGGCCCCTTATATTTCTGCA-----  
AAGCGTAAAGGTATTTCATATTATAAATCTTACTAGAACCCTCGTTTTTTATCAGAAGCTTGTGATTTGGTTTTTGTATGC  
AGCAAGTAGGGGAAAACAATTCTTAATCGTTGGCACGAAAAATAAAGCAGCTGACCTAGTAGCATGGGCTGCAATAAGGG  
CTCGGTGTCATTATGTTAATAAAAAATGGCTCGGCGGTATGTTAACGAATTGGTCCACTACAGAAACGAGACTTCATAAG  
TTTAGAGACTTGAGAACAGAACAAAAACAGGGAGACTTCGTCTGCTTCCGAAAAGAGATGCGGCCGTGTTGAAAAGACA  
ATTATCTCACTTGCAAACATATCTGGGCGGGATTAAATATATGACGGGGTTACCAGATATTGTAATCATCATTGATCAAC  
ACGAAGAATATACGGCACTTCAAGAATGTATCACTTTGGGAATCCAACAATTTCTTTAATCGATACAAATTGTGACCCC  
GATCTTGCAGATATTTGATTCCAGCCAATGATGACGCTATATCTTCAATCCGATTAATTCTTAACAAATTAGTATTCGC  
AATTCTGGAAGGGCGTTCTAGCTAT-----ATAAGAAATCCG-----  
-----ATGGGACAAAAATAAATCCACTTGGTTTTCAGACTTGGT---  
ACAACCCAAAGTCATCATTCCCTTTGGTTTACACAACCAAAA---  
AATTATTCCGAAGGTCTACAAGAAGATCAAAAAATAAGAGATTTTATTAAGAATTATGTACAA---AAA-----  
AATCTGAAAATTTCTCT-----  
-----GGCGTCGAGGGA-----  
ATTGCACGTATAGAAATTCACAAACGAATCGATCTGATCCAGGTCATTATCTATATGGGATTCCCAAAG-----  
-----TTATTAATAGAAAATCGACCGGGA-----GGAATC-----  
GAAAAATTGCAGATGAATTTACAAAAAGAATTT---  
AATTGTGTCAACCGAAAACCTTAACATTACTATCACAAGAATTGCAAAACCTTACGGAAGCCCTAATATTCTTGCAGAATT  
TATAGCCGGCCAATTAAGAATAGAGTTTCTTTTCGAAAAGCAATGAAAAGGCTATTGAATTAAGTGAACAAGCAGATA  
CAAAAGGA---ATTCAAGTACAAATTTGAGGACGTATCGACGGAAAA-----  
GAAATTGCGCGTGTGCAATGGATCAGAGAGGGCAGGGTCCCTTCAAACCATTGAGCTAAAATAGATTATTGTTCTTA  
TACAGTTGAACTATATATGGAGTTTTAGGCATTAATAATTTGGATATTTTTAGACGGGGAA---  
ATGTGCGGTTACCGGGGACCTCGTTTTCAAAAAATACGCCGCTGGGAGCTTTACCGGGACTAACTAAT-----  
AAAAGGCCT-----  
AGAGCCGGAAGTGATCTTAGAAACCAATCACGTTCCGGT-----AAAAA---  
TCTCAATATCGTATTCGTCTAGAAGAAAAACAAAAGTTGCGTTTTTCATTATGGTCTTACAGAACGACAATTACTTAAATA  
CGTTTCGTATCGCCGTAAGCCAAGGGTCAACAGGTCAGGTTTTACTCCAATTACTT  
Dioscorea -----  
-----  
AAAAAGTATTTTGTTCAGTTTCGACCTGTAGTCACATATGAAATAGCTGATGGCATAAAT-----  
TTAGCAACACTTTTCCCTCAGGACCTCTTACAGGAAAAAGATAATGTCCAACCTTAGGGTTGTCAATTATATCCTTTATGG  
AAATGGCAAGTCAATTCGCGGAATTTATCAC-----  
ACAAGTAGTCAATTAGTTTCGACTTGCTTAGTATTGAATTGGGACCAAGAA-----CAAATGAT---TCTATA-----  
-GAA---  
GAGGTTTCACTTCCCTTTATTGAGGTAAGAGCAAATGATCTAATTCGCGATTTTATAAGAATTGACTTAATCAAGTCCAC  
TATTTTCATAT-----ACC---GGAAAAAGGAATGATACGGGGAGTTCCGGGATTGATTCCCGAT-----  
AATGGATTAATAGCACCAATATC---AATCCTTTTTAT-----TCCAAGTCG---AAGATT-----  
-CAATCACTTACTCAAGAC-----  
CAAGAACTATCGGTATGGGTACCTTGTGGAATCGAAATAAAGAATGCCAA-----  
TCTTTGATAATTTTGTTCATCATCCAATTGTTCTCAAATTTGGT-----CCATTT-----AATGGTTCG---  
AAATATAAG-----AATGTGACAAA---GAA-----TCG-----  
-----  
-----GAGAACATAATTTCAATT-----  
ATGGATTTTCTGGGTTCTCTAGGTAATTTGTACCTAAAATAGCGAATTTT---TAT---TCATCT---  
TACCATTTAATAACTCATAATCAGATC---TTGTTAAAGAGATTTTGTACTTTGACAAT-----  
TCTAAACAGACTTTCCAA-----GTACTT-----  
-----  
AAATACGGTTTTAATAGATGAAATAGTAGGATTTATAGTCCCGATCCATGCAGTAACATCATCTTGAATCCATTCCGTTT  
GAATTGGTGCTTTCTCCGTCACAAT-----  
-----TATTGTGAAGAG---ACATCCACA-----  
ATAATTAGCCTTGACAATTTTTTTGTGAA-----AATATATGTCTATTC-----  
AAATACGGACCGAACATAAACATAAAAAA---  
TCTGGTCAAATTTAATTTGTTTACGTTGATTCCCTTAGTGATAAGATCAGCAAAGCCCTATTTGGTCACTCTGGGAGCAAC  
TGTTTCATGGTCATTATGGGAAAATACTTTATGAAGGAGATAGATTAGTTACATTTATATATGAAAGATCGAGATCTGGTG  
ACATAACG---



```
ATTCGTACGTTGCTGAATAGAAATAAGGAATGCCAA-----
TCTTTTCTAATTTTGTGCATCATCCAATTGTTCTCGAATTGGT-----CCATTC-----AATGGTTCT---
AAATCTCAC-----AATGTGACAAAA---GAATCAATT-----CAAATTAAGAG-----
-----
-----GATCCCATGATTCCCATT-----AGGAATTCGTTGGGTCCCTTAGGGACT--
-GTACCTAAAATTGCGAATTTT---GAT---TCACCT---TACTATTTAATAACTCATAATCAGATC---
TTGTAAATAAATATTTGCTACTTGACAAT-----TAAAACAGACTTTCCAA-----GTACTT-----
-----
AAATATTATTTAATGGATGAAAATGGGAGAATTTATAATCCCTATCCATGCAGGAACATCATTTTTTTCATCCATTTGATTT
GACTTGGTGCTTTTCTCCATCACGAT-----TATTGTGAGAAG---ACATCCACA-----
ATAATTGTCCTCGGACAGTTTTATTTGTGAAAATGAAAATGTATGTATATC-----AAATACGGACCA-----
CAGATAAAA-----
TCTGGTCAAGTTCTAATTGTTTCATGTTGACTCCTTAGTCATAAGATCAGCTAAGCCTCATTGCGCCACCCCAGGGGCAAC
CGTTCACGGCCATTATGGAGAAATCCTTTACGAAGGGGATACATTAGTTACATTTATATATGAAAATCGAGATCGGGTG
ATATAACG---
CAAGGTCTTCCAAAAGTGGAAACAAGTGTTAGAAGTGCCTTCGGTTGATTCAATATCGATGAACCTAGAAAAGAGGGTTGA
GGGTTGGAAC---
GAACATATAAAAAGAATTCTTGGAAATCCGTTGGGATTCTTGATTGGTGCTGAGCTAACCATAGCGCAAAGTCGTATCTC
TTTGGTTAATAAGATCCAAAAGGTTTATCGATCCCAGGGGGTGCAAATCCATAATAGGCATATAGAGATTATTGTACGTC
AAATAACATCAAAGTGTTGGTTTTCAGAAGATGGAATGTCTAATGTTTTTCCACCGGAGAATAATAGGATTGTTGCGG
GCGGAACGAACAGGGCGTTCTTTGGAAGAAGCGATCTGTTACCGAGCCATCTTATGGGGAATTACCAGGGCATCTCTGAA
TACTCAAAGTTTCATATCCGAAGCGAGTTTTCAAGAACTGCTCGAGTTTTAGCAAAAGCCGCTCTACGAGGTGCTATTG
ATTGGTTGAAAGGCTGAAAGAGAACGTTGTTCTGGGGGGGATGATACCTGTTGGTACCGGATTC---
AAAGGATTAGTGCACCGTTCA-----AGGCAAGACAACAACATTCCT-----TTGGAA-----ATCAAA--
-----AAGAAGAATCTA-----TTCGAGGGGGGAAATTAGA---GATATTTTGTCCACCACAGA-----
GAATTATTT-----GGTTCTTGCAATCCCAAAT-----AATTTCCATAATACACCAGAACAA-----
-----TTTACG-----GGATTTTCATGATTCC-----
-----
-----
-----
-----
-----
-----
-----
-----
-----
ATGACAAAAAGATATTGGAACATTAATTTAGAAGAGATGATGGAAGCAGGAGTTCATTTTGGTTCATGGTACTAGGAAATG
GAATCCTAGAATGGCACCTTACATCTCTGCA-----
AAGCGTAAAGGTATTCATATTACAAATCTTACTAGAACTGCTCGTTTTTTTTTTCAGAAGCCTGTGATTTAGTTTTTGTATGC
AGCAAGTAGGGGAAAACACTTCTTAAATAGTTGGTACCAAAAATAAAGCAGCTGATTTCAGTAGCATCAGCTGCAATAAAGG
CTCGGTGTCTATTATGTTAAATAAAAATGGCTCGGTGGTATGTCAACGAATTGGTCCACTACAGAAACGAGACTTCATAAG
TTCAGGGATTTGAAAGCGGAACAAAAGGCGGGGAAACTCAACCGTTTACCGAAAAGAGATGCAGCAATGTTGAAAGAGACA
ATTATCTCACCTGCAACATATTTGGGTGGGATCAAATATATGACGGGCTTACCCGATATTGTAATCATCGTTGATCAGC
AAGAAGAATATACGGCTCTTCGAGAATGTCTCACTTTAGGGATTCGACGATTTGCTTAATCGATACAAATTGTAACCCA
GATCTCGCAGATATTTCTATTCCAGCCAACGATGACGCTATAGCGTCAATCCGATTGATTCTTAACAAATTAGTATCCGC
AATTTGTGAGGGTTCGTTCTAGCTAT-----ATAAGAAATCGT-----
-----ATGGGAAAAAAAATAAATCCACTTGGTTTTCCGACTTGGT---
GCAAACCAAAGTCATCGTTCCCTTTGGTTTCGCACAACCAAAA---
AGTTATTCAGGGGTCTCCAAGAAGATGAAAAAATACGGGATTGTATCAAGAATTATGTACAA---AAA-----
AATATGAGA-----TCT-----
-----GGTTCAGAAGGA-----
ATTTACATATAGAGATTAATAAAAAAAAAATCGACCTGATCCAGGTCATAATCTATATTGGATTCCCAAAT-----
-----TTGTTAATAGAGGGTCGAACGCGA-----GGAATC-----
GAAGAATTACGGATCAATGTACAAAAAGGGTTT---
CGTTCTGTGAACCGTAGACTTAACATTGCTATCACAAGAGTTGCAAAACCTTATGGACAACCTAATATTCTTGCAGAATA
TATAGCTCTACAATTAAGAATAGAGTTTCGTTTCGAAAGGCAATGAAAAAGCTATTGAATTAAGTGAACAAGCTGATA
CAAAGGA---ATTCAAGTGCAAATTGCAGGGCGTATCGACGGAAAA-----
GAAATTGCACGTGTCAATGGATCAGAGAAGGTAGGGTTCCCTACAAACCATTTCGAGCTAAAATTGATCATTGTTCTTA
```

TACAGTTCGAACTATCTATGGGGTATTAGGCATCAAAATTTGGATATTTGTAGATGAGCAG---  
ATGTCTCGTTACCGAGGGCCTCGTTTCAAAAAAATACGCCGTTTAGGGGCTTTACCGGGACTCACTAGG-----  
AAAAGACCT-----  
AGATCCGGAAGTGATCTTAGAAATCAATCGCGTTCCGGG-----AAAAGA---  
TCTCAATATCGTATTCGTCTAGAAGAAAAACAAAATTTGCGTTTTTCATTATGGTCTGACAGAGCGACAATTACTTAGATA  
TGTTTCGTATCGCTGGGAAAGCCAAAGGGTCAACGGGTGAGGTTTTACTACAACACTT  
Eucalyptus -----

-----  
AAAAAGTATTTTGTTTTAGTTCGACCCGTAGTGACATATGAAGTATTGGACGGTATAAAT-----  
TTAGCAACACTCTTCCCCCGGATCTGTTACAAGAAAGGGATAATATGCAACTTCGAGTTGTCAATTATATTGTTTACAG  
AAATGGCAAACCAATTCGGGGAATTTCTGAT-----  
ACAAGTATTCGAATTAGTTCGGACTTGTTTAATTTTGAATTGGGACCAAGAC-----AAAAAAGTTCTTCTATC-----  
-GAA---  
GAGGCTCATACTTCCTTTGTTGAAGTAAGTACAAATGGTCTGATTCGAGATTTCTAAGAATTGACTTAGTGAAATTCCC  
TATTTTCGTAT-----CTC---  
AGAAAAAGGAATGATCCCTCAGGCTCAGGATTGATCTCAGATTCAGATAATGTGTCAGATCACACCAATAGC---  
AATCCCTTTTATTCC-----AAGACA---AAAATT---CAACAATTACTTAGCCAAAAT-----  
----CAAGGAACT-----ATTGCGACGTTGTTAAATAAAAAATAAGGAATGTCCA-----  
TCTTTGATAATTTTGTTCATCATCTAATTGTTTCCGAATGGGT-----CCATTC-----AACGCTGGA---  
AAATATCAC-----AATGTGATAAAA---GAATCAATT-----AAAAA-----  
-----

-----  
-----GATCCTATAATTAATAATT-----AGGAATTCGATTGGCCCTTTAGGAACA--  
-GTCCTTCAATTTGTGAATTTT---TAT---TCATTT---TACTATTTAATAACTCATAATCCTATT---  
TTGGTAACTAAATATTTGCAACTTGAAAAT-----TAAAACAGACTTTTCAA-----GTAATT-----  
-----

-----  
AACTATTATTTAATGGATGAAAATGGGAGAATTTTGAATCCCGATTTCATGCAGTAACATCGTTTTGAATTCATTCAATTT  
GAATTGGTATTTTCTCCATCATAAT-----TATTATCATAAT-----  
-----TATTTTGAAGAA---AGATCCACA-----  
ATAATTAGTCTTGGACAGTTTATTTGTGAA-----AATGTATGTATATCC-----AAAAACGGACCC-----  
CATCTCAA-----  
TCGGGTCAAGTTTTGATTGTTCAAGTTGACTCTGTAGTAATAAGATCCGCCAAGCCTTATTTGGCCACTCCAGGAGCAAC  
TGTTTCATGGTCATTATGGAGAAATCCTTTACGAAGGAGATACATTAGTTACATTTATATATGAAAAATCGAGATCCGGTG  
ATATAACG---  
CAGGGTCTTCCAAAAGTGAACAAGTGTTAGAAGTGCCTTCAATTGATTCAATATCGATGAACCTAGAAAAAGAATTGA  
GGGTTGGAAC---  
GAGCATATAAAAAAATTTCTTGAATTCCTTGGGGATTCTTGATTGGGGCTGAACTAACTATAGTGCAAAGTCGTATATC  
TTTGGTTAATAAGATCCAAAAGGTTTATCGATCCCAGGGGGTGCAAATCCATAATAGGCACATAGAAATTATTGTACGCC  
AAATAACATCAAAGGTGTTGGTTTTCAGAGGATGGAATGTCTAATGTTTTTTTACCTGGGAACTAATTGGATTGTTGCGA  
GCGGCGCAACGGGGCGCGCTTTGGAAGAATCGATCTGTTACCGCGCCATCCTATTGGGAATAACAAGGGCATCTTTGAA  
TACTCAAAGTTTCATATCTGAAGCGAGTTTTCAAGAACTGCTCGAGTTTTAGCCAAAGCTGCTCTCCGGGGCCGTATCG  
ATTGGTTGAAAGGCCTAAAAGAGAACGTTGTTATAGGAGGGATGATACCCGTTGGTACCGGATTC---  
AAAGGATTAGTGCATCGTTCA-----AGGCAACATAAGAACATTCCT-----TTGAAA-----ACCAA--  
-----AAGAAGAATTTT-----TTCGAGGGGGAAATCGGA--GATATTTTGTTCACCACAGA-----  
GAATTATTT-----GATTCCTCCATTTCAAAG-----AAGTTTCATGATACATCAGAACAATCA-----  
-----TTTCGA-----GGATTTAATGATTCC-----  
-----  
-----  
-----  
-----

-----  
ATGACAAGAAGGTATTGGAATATCAATTTGGAAGAGATGATGGAAGCGGGAGTTTCATTTTGGTCATGGTACTAGGAAATG  
GAATCCTAGGATGGCACCTTATATTTCTGCC-----  
AAGCGTAAAGGTATTCATATTACAAATCTTACTAAAACGCTCGTTTTTTTATCAGAAGCTTGTGATTTAGTTTTTGTATGC  
AGCAAGTAGGGGAAAACAGTTTTTAATTGTTGGTACCAAGAATAAAGCAGCTGATTCAGTAGCACGGGCTGCAATAAGGG  
CTCGATGTCATTATGTTAATAAAAAGTGGCTCGGTGGTATGTTAACGAATTGGTCCACTACAGAAACGAGACTTCATAAG

TTCAGGGACTTGAGAACGGAACAAAAGGCGGGGAGACTCAATCGTCTTCCGAAAAGAGACGCAGCTATGTTGAAGAGACA  
ATTATCTCACTTGCAAACATATCTGGGCGGGATTAAATATATGACGGGGTTACCTGATATTGTAATTATTGTTGATCAAC  
AAGAAGAATATACGGCTCTTCGAGAATGTATCACTTTGGGAATCCAACAATTTGTTAATCGATACAAATTGTGACCCG  
GATCTTGAGATATTTTCGATTCCAGCAAATGATGACGCTATAGCTTCAATCCGATTAATTCTTAACAAATTAGTATTTGC  
AATTTGTGAGGGTCGTTCTAGCTAT-----ATACGAAATCCT-----  
-----ATGGGACAAAAATAAATCCACTTGGTTTCAGACTTGGT---  
ACAACCCAAGGTCATCATTCTATTTGGTTTGACAAGCCAAA---  
AATTATTCCGATGGTCTGCAAGAAGATCAAAAAATACGAAATTGTATCAAGAATTATTTACAA---AAA-----  
AATATGAGAATATCCTCT-----  
-----GGTGTGGAGGGA-----  
ATTGCACGCATAGAAATTCGAAAAAGAATTGATCTGATTCAAGTCATAATTTATATGGGATTCCCAAAG-----  
-----TTATTACTAGAAGGCAAGACGCGA-----AGAATC-----  
GAAGAATTACAGATGAATGTACAAAAAGAACTT---  
AATTGTGTGAACCGAAAACCTCAACATTGCTATTACAAGAATTACAAACCCTTATGGGCACCCTAATATTCTTGAGAATT  
TATAGCCGGACAGTTAAAGAATAGAGTTTCATTTTCGAAAGCAATAAAAAAGGCTATTGAATTAACCGAACAGGCAGATA  
CAAAGGA---ATTCAAGTACAAATTGCAGGTGCGCTGGACGGAAAA-----  
GAAATTGCACGTGTGCAATGGATGAGAGAAGGTAGGGTTCCTCTACAAACCATTTCGAGCTAAAATTGATTATTGTTCTTA  
TGGAGTCCGAACGGTCTATGGAGTATTAGGCATCAAAATTTGGATATTTTGGGAA-----  
ATGTCGCGTTACCGAGGGCCTCGTTTCAAAAAAATACGCCGTCTTGGGGCTTTACCAGGACTAACTAGT-----  
AAAAGGCCT-----  
AGAGCCGGAAGCGATCTTAGAAACCAATCGCGCTCTGGG-----AAAAAA---  
TCTCAATATCGTATTCGTTTGAAGAAAAACAAAAATTGCGTTTTTCATTATGGTCTTACAGAACGACAATTACTTAAATA  
CGTTTCGTATCGCCGAAAAGCAAAAGGGTCAACAGGTGAGGTTTTACTACAATTACTT  
Ginkgo -----

GAGAAGCCTTTTGTTCGGTCCGATCTGCCGCGGAATATGGAATACACGATGGGTCAAAT-----  
AGAACAGCACCCTTTTACCTAGATCTATTGGGGGAAGAGGACAACCTTGAAGTTCAAGTTGGCAATTATATCCTTTATGG  
AGATGGTGAACAAATTCAAGTAATTAGTGAC-----  
ACAAGTATCCAATTAGTTTCAACTTGTTCGGTATTGAATTGGGAACAA-----AAAGAT---TCTATG-----  
-GAG---  
GAGGCTTATGCCTTTCTTACTGAAGTAAGAATAAATGAGGTAGTTAGAACTTTCTTCAAATTAGTTTGGATGAAATACCC  
CGGG-----GGAAAAAGGAAGAATGTAACAGGTTCCAAATTTCTGTTCAT-----  
AACAGATCGGATCAA-----ACT---AATACTTTTTCT-----TCCAATAGG---GGTAGT-----  
-CAATTCTTTAGTAAGCAT-----CAAGGGACT-----  
ATTTCGTACATTACCTAATGAGGAGAAAGAAGGTGGA-----  
TCGTTTCGCGTTTTGTGCGCCATCTGACTGTTCTCGAACTGTT-----CTGTTC-----AGTGGTTCG---  
AAATATTAT-----GATACGGTAAAG---AGATCAATT-----CAAGAG-----

-----GATCCCATGATGCAAATC-----ATTGAATTGTCGGGTCTATTGGGTAAT--  
-TTACATAGTATCGCTAACCGT---TTC---CCATCC---CCTCATTTGATAACTTATAATAAGGTC---  
TTATCAAATAAACATTCAATTTCCGACAAT-----TCCGAAAAGTTTTCCCAA-----GTATCT-----

AAATGTTATTTTATGGGTGGAATACGGGAATTTTGAATTTGATTTCATGCAGGAACATAATTTTCAATCTATTCAATTC  
GAATTTGGTGTCTCCCTATCCAAT-----TTTTGCAAAAAA---AAACTTCCA-----  
GCAGTTAGCCTTGACAATTGATTCGCGAA-----AGTGTATGTATATCC-----GAGGATAAACCA-----  
CTCTCCGGA-----  
TCTGGTCAAATTATAGCCGTTTCATGAGGAATATTTAGTAATTCGATCAGCTAAACCCTATTTGGCTACTCGGAGGGCAGC  
TGTTTCATGGTCATTATGGAGAATTTCTTGACGAAGGAGATACGTTGATAACATTGATATATGAAAGATCCAAATCCGGTG  
ATACAATT---  
CAAGGTCTTCTAAAGTTGAACAATTATCAGAAGCTCGTTTCGATTAATCCAATACCGAGGAATCTGGAAGAAAGTTTCGA  
AGATTGGAAC---  
GAAGATATGACAAGATCCCTTGGAAAGCCTTTGGGGTTTATTTCATCAGCGCTAGGATAACTATGGAGCAAAGTCAGATCCA  
TCTGGTCAATCAAATTCAAAAGGTTTACCATCCCAAGGAGTGCGAATTTATGATAAGCATATAGAGATTATTGTACGCC  
AAATGACGTCGAAAGTGTTCATTTCCGGGAGATGGAATGGCTGATGTTTTTTTACCCGGGGAACCTAATCGAATTATCACGA  
GCACAAAGAATGAATCGTGCTCTGGAAGAGGCAATCTACTATCGAACTGTGTTATTGGGAATAACGAGGGCATCTCTGGA



TACTCAAAGTTTTATATCAGGAGCGAGTTTTTCAGGAACTGCTCGGGTCTTGGCTAAAGCTGCTCTCCGAGGTCGTATTG  
ATTGGTTGAAAGGCTTGAAGGAAAATGTTATTCTCGGGGGGATAATACCTGCCGGTACTGGGTTCC---  
AAGCGGTTTTCTTCGCCATTTCG-----GAGGAACGGAACAAAATTGAT-----TCGAGA-----ACGGGA--  
-----AATAAGAATCTA-----TTTAACAACAAAAGTGAAA---GATATTTTTCTCCCATCATGGA-----  
AAAGTATCT-----GTTTCTCCCATCAAGGAT-----AATTATCACAATACATTGAAACAACCA-----  
-----TTATGC-----GAAAATAGTGTGGATAAA-----  
-----  
-----  
-----  
-----  
-----

ATGACAAAAGGATATTGGAACATTAATTTGGAAGAGATGATGGAAGCAGGAGTTCATTTTCGGTTCATCAAGCTAGGAAATG  
GAATCCCAGAATGTCACCTTACATTTCTACA-----  
GAGCGTAGAGGTATTCATATTATCAATCTGGCTAAAACCTGCTCGTTTCTTATCAGAAGCCTGCGATTTTCGTGTTTGTATGC  
AGCAGGTAAAGGAAAACAATTCCCAATAGTTGGTACGAAATATCAAGCGGCGGATTTAGTAGCATCAGCTGCTATAGGAG  
CTCGATGTCATTATGTAAATAAAAAATGGCTTGGTGGTATGTTAACTAATTGGTCCACTACAGAAAACAAGACCTCAGAAG  
TTCAAAGATTTGAAGAAAGAACGAGATACGGGACGATTCAATCGACCTCCAAAGAAAGAGACAGCAATGCTCAAGGGACA  
ATTGTCCCAATTGCAAAAATATCCAGGTGGGATTAATACATGACAAGTTTACCTGATATTGTAATAATTGTGCGATCAAC  
AAGAAGAATACACTGCTATCGGGGAATGCATAATTTTGGGTATTCCAACAATTTGCTTAGTCGATACGGATTGTGATCCC  
GATCTCATAGATGTCCCAATTCCTGCCAATGATGATGCTAGAGCTTCAATCCGATTGATCTTGAACAAAATTAACGTCAGC  
AATTTGCGAAGGTCGACATAGCGTT-----  
-----ATGGGACAGAGAATTAATCCACTTGGTTTTAGACTTGGT---  
GTAACCCAAAATCATCGTTCCCATTTGGTTTTGCACAAAAAAA---  
TATTATTCCGAAGATCTCCAAGAGGATGAAGAAATACGTAATTGCATTGAAAATTATGTACGA---AGA-----  
CATATGAAGAACTATTCG-----  
-----AATTATGGAGGA-----

ATTGCACGTGTAGAGATTGGAAGAAAATCGATTTGATTTCAGGTCGAAATCCACATTGGATTTCTTAAC-----  
-----TTGTTAATAGAAGATCGGGGTCGA-----GGAATT-----  
GAACAATTAAGAACCAGTGTACGAAATATGCTC---  
AATTCTGCGAACCGAAAACCTTAACATTTCTATAGCAAAAAGTTGCGAAACCTTATGGAGTACCTAATATTCTTGCAGGAAATA  
TATTGCCCTACAACCTAGAGGATAGAGTTTCATTTCAGAAAACAGTGAAAAAAGCTATTGAACTGGCTGAACAGGCAGATA  
TAAGAGGT---ATTCAAATACAAATTGCAGGACGTCTCGACGGAAAT-----  
GAAATTGCCCGTGTGTAATGGGCCAGAGGAGGTAGGGTTCCCTACAGACCATTTCGAGCTAGAATTGATCATTGCTATTA  
TCCGGCTAAAACCATTTATGGAGTATTAGGGATCAAAAATTTGGATCTTTCGGGGATGAGGAA---  
ATGTCCCGCTATCGAGGACCTCGTTTTAAAAATAATACGTCGCTGAGAGCTTTACCAGGACTAACTAGT-----  
AAAAGACCC-----  
AAATCCGGAAATGATCCCATCAATCGATCTTCTTCTGGA-----AAAATA---  
TCTCAATATCGCATTTCGTCTAGAAGAAAACAATAATTTGCGTTTTTATTATGGACTGACAGAGCGACAATTACTGAAATA  
TGTTTCGTATTGCTAGAAAAGCCAAAGGATCAACGGGCCAGGTCTTATTGCAATTACTT  
Glycine -----  
-----

AAAAAGTATTTTGTGTTTGGTTCGACCGGTAATTTTATATGAAATAGCGGATAGGATCAAT-----  
TTAGTAAAACCTTTTCCCAAGATATGTTCCAAGAAAGAGATAATCTGGAACCTTAAAGTTATTAATTATATTCTTTCTGG  
AAATGGAAAATCCATTTCGGGGAATTTCTGAT-----  
ACAAGTATTCAATTAGTTAGGACTTGTGTTAGTCTTAAATTGGGATCAAGAC-----AAAAAATTTTCTTCTATA-----  
-GAA---  
AATGCGCATGCTTCTTTTGTGTAATAAGTATAAAAAGGTTTGGTTAGATATTTCTTAAGAATTGACTTAGTGAAATCCCA  
TATTTTCATAT-----ATA---AGAAAAAGGAATAATCCGCCCGTTCAAGATTTATCTTGGAT-----  
AATGAGTCGGACCGCACCACCATC---AATCCATTTTTTTCTATTGAT-----TCGAGGGAA---AAAATT---  
CAACAATCACTTAGTAAAAAT-----CATGGAAT-----  
ATTCGTATGTTGTTGAATAGAAATGAAAAATGCCGA-----  
TCTTTGATAATTTTGTTCATCATCGAATTGTTTTCAAAATACGA-----TCATTC-----AACCATGGA---  
AAATATTAC-----AATGGGATAAAA---GAGGGAATT-----AATCAAATTCAAAGA-----  
-----  
-----  
-----GATGCTATGATTCCAATT-----AAAAATTCGTTAGGTCCTTTAGGAATA-----



Gossypium

```
-----  
AAAAAGTATTTTGTGGTTCGACCTGTAACCCCATATGAAATACCGGACGGTCTAAAT-----  
TTAGCAACACTCTTCCCCCAGGATCCATTTTCAGGAAAAAGATAATATGCAACTTCGAGCTGTCAATTATATCCTTTATGG  
AAATGGCAAACCGACTCGGAGAATTTCTGAC-----  
ACAAGTATCAACTAGTTCGGACTTGTGTTAGTGTTGAGTTGGGACCAAGAC-----AACAAAAGTTCTTTTCGCC-----  
-GAA---  
GAGGTCTGTGCTTCTTTTGTGTAAGTAAGGACAAATGGTCTGATTCGAGATTTCTAAGAATCGACTTAGTGAAATCTCA  
TATTTTTTAT-----ATC---AGAAAAAGAAATGATCCGTCAGGTTTCAGAATTGATTTCTGAT-----  
AATAGGTCAGATCGTACCAATAAA---AATCCGTTTTATTCCATTTAT-----TCCAACGCA---AGGATT---  
CAACAATCGTTTAGCCAAAAT-----CACGGAAT-----  
ATTCATACGCTCTTGAACAGAAATAAGGAATCCCAA-----  
TCTTTGATAATTTTGTGAGCATCTAATTGTTTTTCGCATGGGC-----CCATTC-----AACGATGTA---  
AAATATCAC-----AATGTGATAAAA---CAATCAATT-----AAAAA-----  
-----  
-----GATCCTCTAATTCCAATT-----AAGAATTTATTGGGTCCTTTAGGAACA--  
-GCCCCAAAATTGCGAATTTT---TATTCATCATTT---TACCCTTTAATAACTCATAATCAGACC---  
TCGGTAGCGAAATATTTTGAGCTTGACAAT-----TAAAACAGGCTTTTCAA-----GTACTT-----  
-----  
AACTATTATTTAATAGCTGAAAATGGGAGAATTTATAATTTTCGATCCATGCCGTAACATCTTTTTGAATGCAGTCAATTT  
GAATGGTATTTTCCCATCATCAT-----TATCATCATAAT-----  
-----TATTGTGAAGAA---ACGTCCACA-----  
ATAATTAGTCTTGGGCAGTTTATTTGTGAA-----AATGTATGTATAGCC-----AAAAGCGGACCA-----  
CGCCTAAA-----  
TCGGGTCAAGTTTTTATTGTTCAAGCTGATTCTATAGTAATAAGATCGGCTAAGCCTTATTTGGCGACTCCGGGAGCAAC  
TGTCCATGGGCATTATGGAGAAACCCTTTACGAAGGAGATACGTTAGTTACATTTATATATGAAAAATCGAGATCTGGTG  
ATATAACG---  
CAGGGTCTTCCAAAAGTGGAAACAAGTGTTAGAAGTGCGTTTCGATTGATTCAATATCGATGAACCTAGAAAAGAGAATTGA  
GGTTGGAAC---  
GAATGTATAACAAGAATTTCTGGAAATTCCTTGGGGATTTCGTGATTGGTGCTGAGCTAACTATAGTGCAAAGTCGTCTCTC  
TTTGGTAAATAAGATCCAAAAGGTTTATCGATCTCAGGGGTACAGATCCATAATAGGCATATAGAAATTATTGTACGTC  
AAATAACATCAAAGTATTGGTTTTCAGAAGATGGAATGTCTAATGTTTTTTTACCCGGGGAAGTATTGGATTATTGCGA  
GCGGAACGAACGGGGCGTGCTTTAGAAGAAGCGATTTGTATCGAGCCGTTTTATTGGGAATAACGAGAGCATCTCTGAA  
CACTCAAAGTTTTATATCTGAAGCAAGTTTTCAAGAACTGCTCGAGTTTTAGCAAAGCTGCTCTCCGGGGTCTGATCG  
ATTGGTTGAAAGGCCTGAAAGAAAACGTTGTGCTTGGGGGTATGATACCCGCCGTACCGGATTC---  
AAAGGATTAGTGCACCGGTCA-----CGGCAACATAACAACATTCCT-----TTGGAA-----ACAAA--  
-----AAAAAGAATTT-----TTCGGGGGAGAAATGAGA---GATATTTTCTTCCACCACCGA-----  
GAATTATTT-----GACTCTTGCAATTTCAAAC-----AATTTACATGATACATCAGGCCGCTCT-----  
-----TTTATA-----GGTATAGAATTTAATGATTCT-----  
-----  
-----  
ATGGCAAGAAGATATTGGAACATAAAATTTGGAAGAGATGTTGGAAGCAGGAGTTCAATTTGGTCATGGTACTAGGAAATG  
GAATCCTAGAATGGCGCCATATATCTCTGCA-----  
AAACGTAAGGGTATTCATATTACAAATCTGACTAGAACCCTCGTTTTTTTATCAGAAGCTTGTGATTTAGTTTTTGATGC  
AGCAAGTAAGGGAAAACAATTCTTAATTGTTGGTACCAAAAATAAAGCCGCTGATTCGGTGGCGCGGGCTGCAATAAGGG  
CTCGGTGTCATTATGTTAATAAAAAATGGCTCGGTGGTATGTTAACAATTTGGCCACTACAGAAACGAGGCTTCATAAG  
TTCAGGGACTTGAGAACAGAACAAAAGACGGGGGACTCAACCGTCTTCCGAAAAGAGATGCAGCTATGTTGAAGAGACA  
ATTATCTCGCTTGCAAACATATCTGGGCGGGATTAATATATGACGAGATTGCCTGATATTGTAATCATCGTTGATCAGC  
AAGAAGAATATACGGCTCTGCGAGAATGTATCACTTTGGGAATCCAACAATTTGTTAATCGATACAAATAGCGATCCC  
GATCTCGCAGATATTTTCGATTCAGCAAATGATGACGCTATAGCTTCAATTCGATTAATTCTTAACAAATTAGTAGTCGC  
AATTTGTGAGGGTCGTTCTAGCTAT-----ATACGAAATCCT-----  
-----ATGGGACAAAAATAAATCCACTTGGTTTTCAGACTTGGT---
```

ACAACCCAAAGTCATCATTCTCTTTGGTTTGCACAACCGAAA---  
AAGTATTCCGAGGGTCTACAAGAAGATAAAAAATAAGAGACTGTATCAAGAATTATGTACAA---AAA-----  
AATACGAGACTATCTTCT-----  
-----GGTGTTCGAGGGA-----  
ATTGCACGTATAGAGATTCAAAAAAGACTGGATCTAATTCAGGTGATAATCTATATGGGATTTCTTAAA-----  
-----TTATTAATTGAAGATAAGCCACGA-----AAACTC-----  
GAAGAACTACAGATGAATGTGCAAAAAGAACTT---  
AATTGTATGAACCGAAAACCTCAACATTGCTATTACAAGAATTGGAAATCCTTATGGGCACCCTAATATTCTTGCCGAATT  
TATAGCCGGACAATTAAGAATCGAGTTTCATTTGAAAGGCAATGAAAAAGGCTATTGAATTAAGTACGCAAGCGGATA  
CAAAAGGA---ATTCAAATACAAATTGCAGGGCGTATCGACGGAAAA-----  
GAAATCGCACGTGTGCAATGGATCCGAGAAGGTAGGGTTCCTCTACAAACCATTGGAGCGAAAATTGAGTATTGCTCTTA  
TAGAGTTTCAACTATCTATGGGGTATTAGGAATCAAAATTTGGATATTTATAGACGAAGAA---  
ATGTCACGTTACCGAGGGCCTCGTTTCAAAAAAATACGCCGTCTGGGGGCTTTACCGGGACTAACTAGT-----  
AAAAGGCCT-----  
AGAGCCGGAAGCGATCTTAGAAACCAATCGCGCCCCGGT-----AAAAA---  
TCTCAATACCGTATTCGTTTGAAGAAAAACAAAATTGCGTTTTTATTATGGCCTTACAGAACGACAATTACTTAAATA  
CGTTTCGTATTGCCAGAAAAGCCAAAGGGTCAACAGGTGAGTTTACTACAATTACTT  
Helianthus -----

-----  
AAAAAGTATTTTGGTTTCAACCCGTAGTCCCATATAAAAAACGGATGGTATAAAT-----  
TTAGGAAGACTTTTCCAGCGGATCTCTTGCAGGAAAGTGATAATCTACAACCTCGAGTTGTCAATTATATCTTTAT--  
----TACGACCCAATTCTTGAAATTTGGGAC-----  
ACAAGTATCAATTAGTTCGGACTTGTTTAGTGTGAATTGGGACCAAGAC-----AAAAAG-----ATC-----  
-GAA---  
AAGGCCTGTGCTTCCTTTGTTGAAATAAGGACAAATGGTTTGAATTAGAGATTTTCTAAGAATCGACTTAGCGAAGTCACC  
TATTTTCATAT-----ACC---GGAAAAAGGAACGATCTGCCGGGTTCCAGGATTGATCTCTGAG-----  
AATGGATCAGATCGCGCTAATGGC---AATCCGTTTTCTTCCATTTATTCTAT---TCCAAGGCA---ACGATT---  
CAAGAATCCCTTAATCCAAAC-----CAAGGAAC-----  
ATTCATACATTTGTTGAATCGAAATAAGGAATCTCAA-----  
TCTTTGATAATTTGTATCATCAATTTGTTCTCGAATAGGC-----CCATTC-----AACGATGTA---  
AAATATCCC-----AATGTGATAAAA---GACTCAATC-----AAAAAG-----

-----  
-----GACCCCTAATTCCAATT-----AGGAATTCGTTGGGCCCTTAGGAACA--  
-GGCTTTCCAATTTATCATTTT---GAT---TTATTT---TCCATTTAATAACCCATAATCAGATC---  
TTGGTAACGAACTATTTGCAACTTGACAAT-----TAAAACAGATTTTCAA-----ATACTT-----

-----  
AAATATTATTTACTGGATGAAAATGGTAAAATTTATAATCCCTATTCATGCAGTAACATCATTTTGAATCCATTCAAATT  
GAATTGGTATTTTCTCCATTACAAT-----  
-----TATTGTGAAGAG---ACATCTACA-----  
ATCGTTAGTCTTGGGCAGTTTCTTTGTGAA-----AATGTATGTATAGCC-----AAAAAGGACCG-----  
CATTTAAA-----  
TCAGGTCAAGTTCTAATTCTTCAAGTTGACTCTGTGGTAATACGATCAGCTAAGCCTTATTTGGCTACTCCAGGAGCAAC  
TGTTTCATGGACATTACGGGGAAATCCTTTACGAAGGAGATACATTAGTTACATTTATATATGAAAAATCAAGATCTGGTG  
ATATAACG---  
CAAGGTCTTCCAAAAGTGAACAGGTGTTAGAAGTGCCTTCGATTGATTCAATATCGATGAATCTTGAAAAGAGGATTGA  
GGTTTGAAC---  
AAATGTATAACAAGAATTCTTGAATTCCTTGGGCATTCTTTATTGGTGCTAAGCTAACTATAGTGCAAAGTCGTATCTC  
TTTGGTTAATAAGGTCCAAAAGGTTTATCGATCCCAGGGGGTGCAGATACATAATAGGCATATAGAAATTATTGTACGTC  
AAATAACATCAAAAGTGTGGTTTTCAGAAGATGAAATGTCTAATGTTTTTTCGCCCGGAGAATAATTGGATTGTTGCGA  
GCGGAACGAATGGGGCGCGCTTTGGAAGAAGCGATCTGTTACCAAGCCGTCTTATTGGGAATAACAAGAGCATCCATGAA  
TACTCAAAGTTTTCATATCCGAAGCGAGTTTCAAGAAACCGCTCGAGTTTTCAGAAAAGCAGCTCTCCTAGGGCGTATCG  
ATTGGTTGAAAGGCCTAAAAGAAAACGTTGTTCTGGGGGGGATGATACCTGTTGGTAGCGGCTTC---AAA-----  
ACACCTTCA-----AGCGAACCTAACAACATTCTAACAACATTGCCTTTGAA-----CTCAA-----  
AAAAAGAATCTA-----TTAGAGGGGGAAATGAAA---GATATTTTGTCTACCATAGA-----AAATGA-----

-----  
-----  
-----  
-----  
-----  
-----  
-----  
-----  
-----  
-----  
-----  
-----  
-----  
-----  
-----  
-----  
-----  
-----  
-----  
-----  
-----  
-----  
-----

ATGACAAGAAGATATTGGAACATTAATTTAGAAGAGATGATGGAAGCAGGAGTTCATTTTGGCCATGGTACTAGGAAATG  
GAATCCTAAAATGGCACCTTATATCTCTGCA-----  
AAACGTAAAGGTATTTCATATTACAAATCTTACTAGAACTGCTCGTTTTTTATCAGAAGCTTGTGATTTGGTTTTTGTATGC  
AGCAAGTAGGGGAAAACAATTCTTAATTGTTGGCACTAAAAATAAAGAAGCTGATTTCAGTAGCATGGGCTGCAATAAGGG  
CTCGGTGTCATTATGTTAATAAAAAATGGCTCGGTGGTATGTTAACGAATTGGTCCACTACAGAAACGAGACTTCATAAG  
TTTAGAGACTTGAGAACTGAACAAAAAACAGGGGGGCTCAGCCGTCTTCCGAAAAGAGATGCGGCTATGTTGAAAAGACA  
ATTATCTCATTGCAACATATCTGGGCGGGATTAATATATGACAGGGTTACCCGATATTGTAATCATCGTTGATCAGC  
ACGAAGAATATACGGCCCTTCAAGAATGTATCACATTGGGAATTCCAACAATTTGTTAATCGATACAAATTGTGACCCC  
GATCTCGCAGATATTTTCGATTCCAGCGAATGATGACGCTATATCTTCAATCCGATTAATTCTTAACAAATTAGTATTTGC  
AATTTGTGAGGGCCGTTCTGGCTAT-----ATAAGAAATCCGTGA-----  
-----ATGGGACAAAAATAAATCCAATTGGTTTTGAGACTTGGT---  
ACAACCCAAGGTTCATCATTCCCTTTGGTTCGCACAACCAAAA---  
AATTATTCTGAGGGTCTGCAAGAAGATCAAAAAATAAGAAATTATATAAAGAATTATGTACAA---AAA-----  
AATATGAAAACATCTTCT-----  
-----GGCGTCGAGGGA-----  
ATTGCACGTATAGAGATTCAAAAAAGAATCGACCTGATCCAAATCATAATCTATATGGGATTTCCAAAA-----  
-----ATATTAATTGAAAGTCGACCCCGA-----GGAATC-----  
GAAGAATTACAGATGAATTTACAAAAAGAATTT---  
AATTCTGTAAATCGGAACTTAACATTGCTATCACACGAATTGAAAAGCCTTATGGAAACCCTAATATTCTTGCAGAATT  
TATAGCCGGACAATTAAAAAATAGAGTTTCTTTTCGCAAAGCAATGAAAAAGGCTATAGAATTAACCTGAACAAGCAGATA  
CAAAAGGA---ATTCAAGTGCAAATTGCAGGACGTATCGACGGAAAA-----  
GAAATTGCGCGTGTGTAATGGATCAGAGAGGGTAGGGTCCACTACAAACCATTGCGCTAAAATTGATTATTGTTTCTTA  
TACAGTTTCGAACAATCTATGGGGTATTAGGCATCAAAATTTGGATCTTTATAGAAGGGGAATAAATGTCGCGTTACCGAG  
GTCTTCGTTTTCAAAAAAATACGTCGCCTGGGGGCTTTACCAGGGCTAACTAAT-----AAAAGGCC-----  
-----

AGAGCTGGAAGTGATCTTAGAAACCAATCGCGTTCCGGG-----AAAAA---  
TCCCAATATCGTATTTCGCTTAGAAGAAAAACAAAATTGCGTTTTTATTATGGTCTTACAGAACGACAATTACTTAAATA  
CGTTTCGTATCGCCGAAAGGCAAAGGGTCAACAGGTCAGGTTTTACTACAATTACTT  
Illicium -----  
-----  
AAAAAGTATTTTGTTCAGTTCGAGCCGTAGTAATATATGAAATAGCTGATGGAATACAT-----  
TTAGCAACACTTTTCCCCAGGATCTGCTGCAGGAAAGGGATAATTTGCAACTCCGAGTTGTGAATTATTTCTTTTATGG  
AAATGGCAAACCAATTTCGAGGAATTTCTCAC-----  
AAAAGTATTCGAATAGTTTCGACTTGTTTAGTATTGAATTTGGGACCAAGAC-----CAGAATGGT---TCTATA-----  
-GAA---  
GAGGTTTATGCTTCCTTTGTTAAAGTAAGGGCAAATGATCTGATTTCGAGATTTTCATAAGAATTGACTTGGTGAAGTCCCC  
TATTTCA-----AAAAGGAATGATACGGCAGGTTTCGGGATTGATCCCCGTT-----  
AATGGATCAGATCGCACCAATATC---AATCCTTTTTGT-----TCCAAGGCG---AGGATT-----  
-CAATCACTTAGCCAACAT-----CAAGGAACT-----  
GTTTCGTACGTTTTCTGAATAGAAATAAGGAAGGTGAA-----  
TCTTTTCTAGTTTTGTTCATCATCCAATTGTTCTCGAATTGGT-----CCATTC-----AATGGGTTG---  
AAATATCAC-----AATCTTACAAAAAAGAATCAATT-----CAAATTAAGAG-----  
-----  
-----  
-----GATCCCATGATTCCAATT-----AGGAATTCGTTGGGCCCTTTTGGGACG---  
-GTACCTAAAATTGCGAATTTT---TAC---TCATCT---TACCAGTTAATAACTCATAATGAGATC---  
TTGTTAAATAAATATTTGCTACTTGATAAT-----CCAAAACAGACTTTTCGAA-----GCACTG-----  
-----

AAATATTATTTTCATGGATGAAAATGGGATAATTTATAATCCCGATCCGTGCAGTAACATCATTTTGAATCCGTTTTGATTC  
GAATTGGTACTTTCCACATCAAGAT-----  
-----TATTGTGAAGAG---ACATGCACA-----

ATAATTAGTCTTGGACAGTTTTATTTGTGAA-----AATGTATGTATATCC-----AAACACGGACCA-----  
CGCATAAAA-----  
TCTGGTCAAGTTCTAATTGTTTCATGTTGATTCCCTTAGTAATAAGATCAGCGAAGCCTCATTGGCCACCCCAGGAGCAAC  
CGTTCATGGTCATTATGGAGAAATCCTTTACGAAGGAAATACATTAGTTACATTTATATATGAAAAATCGAGATCTGGTG  
ATATAACT---  
CAAGGTCTTCCAAAAGTAGAACAAGTGTTAGAAGTTCGTTTCGATTGATTCAATATCGATGAACCTAGAAAAGAGGTTTGA  
AGGTTGGGGC---  
GAGCGTATGACAGGAATTCTTGGAAATCCCTTGGGGATTTTTGATTGGTGCTGAGCTAACCATAGCGCAAAGCCATTTCTC  
TTTGGTTAATAAGATCCAAAGGGTTTATCGATCCCAGGGGTGCAGATCCATAATAGGCATATAGAGATTATTGTACGCC  
AAATAACATCAAAAAGTATTGGTTTTCAGAAGATGGAATGTCTAATGTTTTCTCACCCGGAGAATAACGGATTGTTGCGA  
GCCGAACGAACAGGTCGTGCTTTTGGGAAGAAGCGATCTGTTACCGAGCCGCTTTATTGGGAATAACGAGGGCATCTCTGAA  
TACTCAAAGTTTTCATATCCGAAGCGAGTTTTCAAGAAACCCTCGAGTTTTAGCAAAGCCGCTTTACGAGGCCGATTG  
ATTGGTTGAAAGGACTGAAAGAAAATGTTGTTCTGGGGGGGATGATACCTGTTGGTACCGGATT---  
AAGGGATTAGTTCACCATTCA-----AGGGAACACAACAACATTCCT-----TTTTGAA-----ATCCAA--  
-----AAGAAGAGTAGA-----TTCGAGGGGAAATGAGA---GATATTTTTGTTCCCCCACAGA-----  
GAATTATTT-----TGTTCTTGCCCTCGAAACA-----AATTTCCATGATACATCAGAACAATCT-----  
-----TTTATG-----GGATTGAATGATTCA-----  
-----  
-----  
-----  
-----  
-----  
-----

ATGACAAGAAGATATTGGAACATCAATTTGGAAGAGATGCTGGAAGCAGGAGTTCATTTTGGTCATGGTACTAGGAAATG  
GAATCCTAGAATGGCACCTTACATCTCTGCA-----  
AAGCGTAAAGGTATTCAATTACAAATCTTACTAGAACTGCTCGTTCTTTATCCGAAGCCTGTGATTAGTTTTTGTATGC  
AGCAAGTAGAGGAAAACACTTCTTAATAGTTGGTACGAAAGATAAAGCAGCGGATTTCAGTAGCATCAGTGCAATAAGGG  
TTCGGTGCCATTATGTCAATAAAAAATGGCTTGGTGGTATGTTAACTAATTGGTTCACTACAGAAACGAGACTTCATAAG  
CTCAGGGATTTGAGAGCAGAACAAGACAGGGAGACTCAACCGTCTCCCGAAAAGAGATGCAGCAATGTTAAAGAGAAA  
ATTATCTCACTTGCAAGCATATCTGGGCGGGATCAAAATATATGACGGGGTTACCCGATATTGTAATCATCATCGATCAGC  
AAGAAGAATATACAGCTATTAGAGAATGTGCCACTTTGGGTATTCCAACGATTTGTTTAATCGATACAAATTGTGACCCG  
GATCTCGCGGATATTCCGATTCCAGCCAATGATGACGCTATAGCTTCAATCAGATTAATTCTTAACAAATTAGTATCGGC  
AATTTGTGAGGGCCGTTCTAGCTAT-----ATAAGAAATCAT-----  
-----ATGGGACAAAAATAAATCCACTTGGTTTCAGACTTGGT---  
ACAACCCAAAGTCATCATTGCCTTTGGTTTCGCACAACCAAAA---  
AATTATTCCGGGGTCTCCAGGAAGATGAAAAAATACGGGATTGTATCAAGAATTATGTACAA---AAA-----  
CATATGAGAGTATCCTCA-----  
-----GGTTTCGAAGGA-----  
ATTGCGCGTATAGGGATTCAAAAAAATCGATCTGATCCAGGTCATAATCCATATTGGATTCCCCCAT-----  
-----TTTTTAATAGAGGGTCGAGCCCGA-----GGAATC-----  
GAAGAATTACAGATCAATGTACAAAAAAGTTA---  
AATTCTGTGAACCGGAGACTCAACATTGCTATCACAAGAGTTGCAAAACCGTATGGACAACCCACTATTCTTGCAGAATA  
TATAGCTCTACAATTAAGAATAGAGTTTCGTTTCGAAAGGCAATGAAAAAGCTATTGAATTAACCTGAACAAGCGGACA  
CAAAGGGA---ATTCAGGTACAAATTCGGGGCGTATCAACGGAAAA-----  
GAAATTGCCCCTGTGCAATGGATCAGAGAAGGTAGGGTTCCCTACAGACGATTTCGAGCTAAAATCGATCATTGTTCCCTA  
TGCAGTTCGAACTATCTATGGGGTATTAGGCATCAAAAATTTGGATATTTCTAGACGAGGAA---  
ATGTCTCGTTACCGAGGGCCTCGTTTTCAAAAAAATACGCCGCTCTGGGGTCTTTACCGGGACTAACTAGT-----  
AAAAGACCT-----  
AGATCCGGAAGTGATCTTAGAAAACCAATCGCGCTCCGGG-----AAAAGA---  
TCTCAATATCGTATTTCGTCTAGAAGAAAACAGAAATTACGTTTTATTGTTGCTGACAGAGCGACAATTACTTAGATA  
TGTTTCGTATCGCCGAAAAGCCAAAGGGTCAACAGGCCAGGTTTTACTACAACCTACTT

Jasminum

-----  
-----  
AAAAAGTTTTTTTTGTTTTGGTTTCGACCTGTCATCACATATGAAATAACGGACGGTATAAATAAATTTAGCAACACTTTT  
TCCCCCGGATCTCTTGCAGGAAAGGGATAATGTGCAACTTCGAGTTGTCAATTATATCCTTTATGAAAATGGCAACCCAA  
TTCGAGGTTTTTCTCAT-----ACAGATAGTCAATTAGTTCGGACTTGTTTAGTATTGAATTGGGACCAAGAC---  
AAAAAAAAGTGTTCTAGT-----GAA-----

GAAGCCCGTGCTTCCTTTGTTGAAATAAGGACAAATGGTTTGGATTTCGACATTTCTTAAGAATCGACTTAGTGAAATCCCC  
 GATTTTCATAT-----ATC---GGAAAAAGGAATGATCCATCGGGTTCAGGATTGCCCTCTGAT-----  
 AATGGATCTGGTTGGACCAATATG---AATCCGTTTTCTCCATTTAT-----TCCAAGGCA---AGAATT---  
 CAACAATCCCTTAACCAAAAT-----CAAGGAACT-----  
 ATTCATACATTGTTAAATCGAAATACGGGATTCCAA-----  
 TCGTTGAGAATTTTGTGCATCATCCAATTGTTCTCGAATGGGT-----CCATTC-----  
 AACGATGTAATAAAATATCAC-----AAA---  
 GAATCAATTCCAATTACTCTAATTACAAAG-----  
 -----  
 -----GATCCTTTCATTCCAATT-----  
 AAGAATTTTAAGAATTTCGCTGGGGCCTTTTGGAAACA---GCCTTTCCAATTGCGAATTTT---GAT---TCATTT---  
 TCTCATTTAATAAATACTCAGAATCGAATC---TTGGTAAATAACTATTTGGAACCTTGACAAT-----  
 TTCAAACAGACTTTCCAA-----GTAATT-----  
 -----  
 CAATATTATTTAATGGATGAAATCCAAAAATTTATAACCCCGATCTAGGCAGTAACATTCTTTTGAATCCATTCAATTG  
 GAATTGGTATTTTTATCATCATACT-----  
 -----TATTGTCAAGAA---ACATCTCCA-----  
 ATAATTAGTCTTGGACAGTTTTATTTGTGAA-----AATGTATGTATAGCC-----AAAAATGCACCA-----  
 CACCTAAAA-----  
 TCGGGTCAAGTTTATACTTGTTCGAAGTGCCTCTGTAGTAATACGATCAGCTAAGCCTTATTTGGCCACTCCAGGAACAAC  
 TGTTTCATGGCCATTATGGAGAAATCCTGTATGAAGGAGATACATTAATTACATTTCTATATGAAAAATCGAGATCTAGTG  
 ATATAACG---  
 CAGGGGCTCCCAAAAGTGAAGAGGTGTTCGAAGTGCCTTCGATTGATTCAATATCGATGAATCTAGAAAAGAGGTTTAA  
 GGGTTGGAAC---  
 AAACGTATAACAAGAATTCTTGAATGCCGTGGGGTTTCTTGATTGGTGCTGAGCTAACTATAGTGCAAAGTCGTATCTC  
 TTTGGTTAATAAGATCCAAAGGGTTTATCGATCCCAGGGGGTGCAGATTCAATAAGGCATATAGAAATTATTGTACGCC  
 AAATAACATCAAAAAGTGTGGTTTCCGAAGATGGAATGTCTAATGTTTTTACCCCGGAGAATTAATTGGATTATTGCGA  
 GCGGAACGAATGGGCGCGCTTTGGAAGAAGCGGTCTATTACCGGCCATCTTATTGGGAATAACAAGAGCATCTCTCAA  
 TACTCAAAGTTTTCATATCTGAAGCGAGTTTTCAAGAGACTGCTCGAGTTTTAGCAAAGCAGCTCTCCGGGGTTCGGATCG  
 ATTTGGTTGAAGGGCCTGAAAGAGAAGTTGTTTTGGGGGGTATGATACCCCTTGGTACCGGATTT---  
 AAAGGATTAGTGCCTTCA-----AAACAAGATAACAACAGTTCT-----TTGGAA-----ACAAAA--  
 -----AAAAAAATCTA-----TTCGAAGGGGAAATGAGA---GATATTTTCTTTACCATAGA-----  
 AAATTATTT-----GATTCTTGTGCTTCAAAG-----AATTTCCATGATACATCAGAACAATCA-----  
 -----CTTCTA-----GGATTTTCATGATTCCTAA-----  
 -----  
 -----  
 -----  
 -----  
 -----  
 -----  
 -----  
 -----  
 -----  
 ATGGCAAGAAGATATTGGAATATCAATTTGGAAGAGATGATGGTGGCCGGAGTTCATTTTGGCCATCCGACTAAGCAATG  
 GAATCCTAAAATGGCACCTTATATCTATGCAAAGGTAAAGCGTAAAGGTATTTCATATTCCAAATCTTACTAGAACTGCTC  
 GTTTTTTATCCGAAGCCTGTGATTTGGTTTTTGGATGCAGCAAGTAGGGGAAAAGAATTCTTAATTGTTGGTACCAAACCG  
 AAAGCAGCTGGTTTCAGTAGTACGGGCTGCGATAAGGGCCCGGTGTCATTATGTTAATAAAAAATGGCTCGGCGGTATGTT  
 AACGAATTGGTTCACTACAAAAACGAGACTTCATACGTTTCAGGGACTTGAGAATGGAACAAAAAACAGGAAGACTCAACC  
 GTCTTCCGAAAAGGGACGTAGCTATGTTGAAAAGACAATTATCTCGCTTGAAGCATATCTGGGCGGGATTCAATATATG  
 ACAGGGTTACCCGATATTGTAATTTCTCGTTGATCAGCACGAAGAATATACGGCCCTACGAGAGTGTATCACTTTGGGAAT  
 TCCAACAATTTGTTTAATCGATACAAATTTGACCCCGATCTTGCAGATCTTCCGATTCCAGCGAATGATGACGCTAAAC  
 CTTCAATCCGCTTAAATTCTTAAACAATTTAGTATTCGCAATTTGTGAGGGTCTTCTAGCTAT-----  
 ATAAGAAATCCTTGA-----  
 ATGGGACAAAAATAAATCCACTTGGTTTTGACTTGGT---  
 ACAACCAAGGTACCATTCCCTTTGGATTTCAACAACCAAAA---  
 AATTATTCTAAGGGTTTTAAAGAAGATCAAAACATAAGAGATTTTATCCAAATTATATACAA---AAG-----  
 AATATGAGAATATCTCCTCCCGCGAC-----  
 -----CGCGTCGAGGGA-----  
 ATTGACAGTATAGAAATTAACAAACAATTGATTTGATCCAGATCATAATCTTTATGGGATTCCCAGATAGAAAATAGACC  
 GCGAAAAGTCAAAGAA-----AAAATA-----

AAAGAATTACAGATTCACCTAGAAAAAGAATTT---  
CATTATGTGAAAAAAAAACTTAAGATTGCTATCACAAAAATTGCAAAACCTTATCAAAACCCAAAAATTCTTGCAGAATT  
TCTAGCTGGACAATTAAGATAGAGTTTCATTTTCGAAAAGCAATGAAAAGGCTATTGAATTGGCTGAACAAGCAGATA  
CAGAAGGA---ATTTCGAGTACAAATGGCAGGGCGTATCAACGGAAAA-----  
GATATTGCACGGGTCGAATGGATCAGAAGGGGTAGGCTTCCCCTACAAACCATTTCGAACTAAAATTGATTATTGTTGCTA  
TACAATTCGAACTATCTATGGGGTATTGGGTATCAAAATTTGGATATTTATAGACGAAAAATAAATGCCGCGTTACCTAG  
GACCTCGTTTCAAAAAAATACGCCGCTGGGGGCTTTACCAGGACTAACTAAT-----AAAAGTCCT-----

AAAGCCGGAAGTGATCTTAGAAAGCAACCACGTTCCAGG-----AAAAA---  
TCTCAATATCGTATTCGTCTAGAAGAAAAACAAAAATTGTGTTTTTCATTATGGTCTTAGAGAATACCAATTACTTAATTA  
TGTTTCGTATCGCCGCAAAAGCCAAGGGGCCAACAGGTCAAGTTTTACTACAATTACTT  
Lactuca

AAAAAGTATTTTGTGTTTGGTTCAACCTGTAGTCCCATATAAAAAACGGATGGTATAAAT-----  
TTAGGAAGACTTTTCCC GCCGATCTCTTGCAGGAAAGTGATAATCTACAACCTTCGAGTTGTCAATTATATCCTTTAT--  
----TACGACCCAATTCTTGAAATTTGGGAC-----  
ACAAGTATTCAATTAGTTCGGACTTCTTTAGTGTGTAATTGGGACCAAGAC-----AAAAA-----ATC-----  
-GAA---  
AAGGCCTGTGCTTCCCTTTGTTGAAATAAGGACAAATGGTTTTGCTTAGATATTTCTAAGAATCGACTTAGCTAAGTCACC  
TATTTCTTAT-----ACC---GGAAAAGGAACGATCTGTCCGGTTCAGGATTGATCTCTGAG-----  
AATGGATCAGATCGCGCTAATGTC---AATCCATTTTCTTCCATTTATTCTAT---TCCAAGTCA---AGGATT---  
AAAGAATCCCTTAATCCAAAT-----CAAGGAACT-----  
ATCCATACGTTGTTGAATCGAAATAAGGAATCTCAA-----  
TCTTTGATAATTTTGTGCATCATCCAATTGTTTTTCGAATAGGC-----CCATTC-----AACGATGTA---  
AAATCTCCC-----AATGTGATAAAA---GAATCAATC-----AAAAAG-----

-----AACCCCTAATTCCAATT-----AGGAATTCGTTGGGCCCCGTTAGGAACA--  
-GGTTTTCCAATTTATAATTTT---GAT---TTATTT---TCCCATTTAATAACCCATAATCAGATC---  
TTGGTAACTAACTATTTGCAACTTGACAAT-----TTCAAACAGATTTTCAA-----ATACTT-----

AAATATTATTTACTGGATGAAATGGTCAAATTTATAATCCCTATTCATGCAGTAACATCATTTTGAATCCATTCCATT  
GAATTGGTATTTTCTCCATTACAAT-----

-----TATTGTGAAGAG---ACATCTCCA-----  
ATCGTTAGTCTTGGGCAGTTTTCTTTGTGAA-----AATGTATGTATAGCA-----AAAAAAGGACCG-----  
CATTTAAAA-----

TCGGGTCAAGTTCTAATTGTTCAAGTTGACTCTGTGGTAATACGATCAGCTAAGCCTTATTTGGCTACTCCAGGAGCAAC  
TGTTTCATGGACATTATGGGGAAATCCTTTACGAAGGCATACATTAGTTACATTTATATATGAAAAATCAAGATCTGGTG  
ATATAACG---  
CAAGGTCTTCCAAAAGTGGAACAGGTGTTAGAAGTGCGTTTCGATTGATTCAATATCGATGAATCTCGAAAAGAGGATTGA  
GGGTTGGAAC---

AAATCTATAACAAGAATTCTTGGAAATCCTTGGGCATTCTTGATTGGTGCTGAACTAACTATAGTGCAAAGTCGTATCTC  
TTTGGTTAATAAGGTCCAAAAGGTTTATCGCTCCCAGGGGGTGCAGATACATAATAGGCATATAGAAATTATTGTACGTC  
AAATAACATCAAAAGTTTTGGTTTTGAGAAGATGAAATGTCTAATGTTTTTTCGCCCCGGAAGTAATTTGGATTGTTGCGA  
GCGGAACGAATGGGACGCGCTTTGGAAGAAGCGATCTGTTACCAAGCCGTCTTATTGGGAATAACAAGAGCATCTATGAA  
TACTCAAAGTTTCATATCCGAAGCTAGTTTTCAAGAACTGCTAGAGTTTTAGCAAAGCAGCTCTCCTGGGCCGTATCG  
ATTGGTTGAAAGCCCTGAAAGAAAACGTTGTTCTGGGGGGGATGATACCTGTTGGTAGCGGCTTC---AAA-----  
ACACCTTCA-----AGCGAACCTAACAACATTCTAACAACATTGCCTTTGAA-----CTCAA-----  
AAAAAGAATCTA-----TTAGAGGGGGAAATGAAA---GATATTTTGTCTACCACAGA-----AAATTATTT-----  
-GATTCTTGCTTTCAAAT-----AATTTCCATGATACACAAGAACAATCA-----TTTTTT-  
-----TAG-----

--



ATGACAAGAAGATATTGGAACATTAATTTAGAAGAGATGATGGAAGCAGGAGTTCATTTTGGCCATGGTACTAGGAAATG  
GAATCCTAAAATGGCACCTTATATCTCTGCA-----  
AAACGTAAAGGTATTTCATATTACAAATCTTACTAGAACTGCTCGTTTTTTATCAGAAGCTTGTGATTTGGTTTTTGTATGC  
AGCAAGCAGAGGAAAACAATTCTTAATTGTTGGCACTAAAAATAAAGAAGCTGATTCAGTAGCATGGGCTGCAATAAGGG  
CTCGGTGTCATTATGTTAATAAAAAATGGCTCGGTGGTATGTTAACGAATTGGTCCACTACAGAAAACAAGACTTCATAAG  
TTTAGAGACTTGAGAACCGAACAAAAACAGGGGGGCTCGACCGTCTTCCGAAAAGAGATGCGGCTATGTTGAAAAGACA  
ATTATCTCATTGCAAACATATCTGGGTGGGATTAAATATATGACAGGGTTACCCGATATTGTAATCATCGTTGATCAGC  
ACGAAGAATATACGGCCCTTCAAGAATGTATCACGTTGGGAATCCAACAATTTGTTAATCGATACAAATTGTGACCCC  
GATCTCGCAGATATTTGATTCCAGCCAATGATGACGCTATATCTTCAATCCGATTAATTCTTAACAAATTAGTATTTGC  
AATTTGTGAAGGCCGTTCTGGCTAT-----ATAAGAAATCCGTGA-----  
-----ATGGGACAAAAATAAATCCAATTGGTTTTCAGACTTGGT---  
ACAACCCAAGGTCATCATTCCCTTTGGTTCGCACAACCAAAA---  
AATTATTCTGAGGGTCTGCAAGAAGATAAAAAATAAGAACTTATATCCAGAATTATGTACAA---AAA-----  
AATATGAAAACATCTTCT-----  
-----GGCGTCGAGGGA-----  
ATTGCACGTATAGAGATTCAAAAAAGAATCGACCTGATCCAAATCATAATCTATATGGGATTTCCAAAA-----  
-----ATCTTAATTGAAAGTCGACCCCGA-----GGAATC-----  
GAAGAATTACAGATGAATTTACAAAAAGAATTT---  
CATTCTGTAAATAGAAAACCTTAACATTGCTATCACACGAATTGAAAAGCCTTACGGAAACCCTAATATTCTTGCAGAATT  
TATAGCGGGCCAATTAAAAAATAGAGTTTCTTTTCGCAAAGCAATGAAAAGGCTATAGAATTAAGTGAACAAGCAGATA  
CAAAAGGA---ATTCAAGTGCAAATTGCAGGACGTATCGACGGAAAA-----  
GAAATTGCGCGTGTGAAATGGATCAGAGAGGGGAGGGTCCACTACAAACCATTTCGAGCTAAAATTGATTATTGTTGCTA  
TACAGTTGCAACGATCTATGGGGTATTAGGCATCAAAATTTGGATATTTATAGACGGGGAATAAATGTGCGGTTACCGAG  
GTCCTCGTTTTCAAAAAATACGCCGCTGGGGGCTTTACCAGGGCTAACTAAT-----AAAAGGCC-----  
-----  
AGAGCTGGAAGTGATCTTAGAAACCAATCGCGTTCGGG-----AAAAA---  
TCCCAATATCGAATTCGCCTAGAAGAAAAACAAAAATTGCGTTTTTCATTATGGTCTTACAGAACGACAATTACTTAAATA  
CGTTTCGTATCGCCGAAAGGCAAAAGGGTCAACAGGTCAGGTTTTACTACAATTACTT  
Liriodendron -----  
-----  
AAAAAGTATTTTGTCTCGGTTTCGACCCGTAGTCACATATGAAATAGCTGATGGGATCAAT-----  
TTAGGAACGCTTTTCCCCCAGGATCTGTTGCAGGAAAGGGATAATGTGCAACTACGAGTTGTCAATTATATCCTTTATGG  
AAATGGCAAACCAATTTCGAGGAATTTATCAC-----  
ACAAGTATTCAATTAGTTTCGGACTTGTTTTAGTATTGAATTGGGACCAAGAC-----CGAAATGGT---TCTATA-----  
-GAA---  
GAAGTTCATGCTTCCTTTGTTGAAGTAGGGACAAATGATCTGATTTCGAGATTTTATCAGAATTGATTTGGTGAAGTCCCC  
TATTTTCGTAT-----ATC---GGAAAAAGGGATGATACGACAGGTTTCAGGATTGATCCCCGAT-----  
AATGAATCAGATCGCACCAATATC---AATACTTTTTAT-----TCCAAGACG---AGGATT-----  
-CAATCACTTACCCAACAT-----CAAGGAACT-----  
ATTCGTACGTTTCTGAATAGAAATAAGGAATGCCAA-----  
TCTTTTCTAATTTTGTTCATCATCTGATTGTTCTCGAATTGGT-----CCATTC-----AATGGTTCG---  
AAATCTCAC-----AAGGTGACAAAA---GAATCAATT-----AAAGAG-----  
-----  
-----GATCCCATGATTCCCATT-----AGGAATTCGTTGGGTCCCTTAGGGACT--  
-GTACCTAAAATTGCGAATTTT---TAT---TCATCT---TACTATTTAATAACTCATAATCAGATT---  
TTGTTAAATAAATATTTGCTACTTGGACAAT-----TTAAAACAGACTTTCCAA-----GTACTT-----  
-----  
AAATACTATTTAATGGATGAAATGGGAGAATTTATAATCCAATCTGCACAGTAACATCATTTTTAATCCATTTCGATTT  
GAATTGGTGCTTTCTCCGTCACGAT-----  
-----TATTGTGAGGAG---ACATCCACA-----  
ATAATTAGCCTTGGACAGTTTTATTTGTGAA-----AATGTATGTATATCC-----AAATATGGACCA-----  
CACATAAAA-----  
TCTGGTCAAGTTCTAATTGTTTCATGTTGACTCCTTAGTAATAAGATCAGCTAAGCCTCATTGGCCACTCCAGGAGCAAC  
CGTCCATGGCCATTATGGAGAAATCCTTTCCGAAGGAGATACATTAGTTACATTTATATATGAAAATCGAGATCGGGTG  
ATATAACG---  
CAAGGTCTTCCAAAAGTGAACAAGTCTTAGAAGTGCGTTCGATTGATTCAATATCGATGAACCTAGAAAAGAGGATTGA

AGGTTGGAAC---  
GAACATATAACAAGAATTCTTGGAAATTCCTTGGGGATTCTTGATTGGCGCTGAGCTAACCATAGCGCAAAGTCGTATCTC  
TTTGGTTAATAAGATCCAAAAGGTTTATCGATCCCAGGGGGTGCAGATCCATAATAGGCATATAGAGATTATTGTACGTC  
AAATAACATCCAAAGTGTGGTTTCGGAAGATGGAATGTCTAATGTTTTTCCACCGGAGAATAATCGGATTGTTGCGA  
GCGGAACGAACAGGGCGTGCTTTGGAAGAAGGGATCTGTTACCGAGCCATCTTATTGGGAATAACGAGGGCATCTCTGAA  
TACTCAAAGTTTCATATCCGAAGCGAGTTTTCAAGAAACCGCTCGAGTTTTAGCAAAGCCGCTCTACGAGGTCGTATTG  
ATTGGTTGAAAGGCCTGAAAGAGAACGTTGTTCTGGGGGGGATGATACCTGTTGGTACCGGATTC---  
AAAGGATTAGTGCACCGTTCA-----AGGCAACACAACAACATTCT-----TTGGAA-----ATCAAA--  
-----AAGAAGAATCTA-----TTCGAGGGGGAAATGAGA--GATATTTTGTTCACCACAGA-----  
GAATTATTG-----AGTTCCTTGCATCCCAAAA-----AATTTCCATGATACATCAGAACAATCA-----  
-----TTTACG-----GGATTTAATGATTCC-----  
-----  
-----  
-----  
-----  
-----

ATGACAAGAAGATATTGGAACATCCATTTGGAAGAGATGATGGAGGCAGGAGTTCATTTTGGTTCATGGTACTAGGAAATG  
GAATCCTAGAATGGCACCTTACATCTCTGCA-----  
AAGCGTAAAGGTATTTCATATTACAAATCTTACTAGAACTGCTCGTTTTTTATCAGAAGCCTGTGATTTAGTTTTTGTATGC  
AGCAAGTAGGGGAAAAAACTTCTTACTAGTTGGTACCAAAAATAAAGCAGCTGATTCAGTAGCATCAGCTGCAATAAGGG  
CTCGGTGTCATTATGTTAATAAAAAATGGCTCGGTGGTATGTTAACGAATTGGTCCACTACAGAAACGAGACTTCATAAG  
TTCAGGGACTTGAGAGCGGAACAAAAGACGGGGAACTCAATCGTCTCCCGAAAAGAGATGCAGCAATGTTGAAGAGACA  
ATTATCTCACTTGCAAACATATCTGGGTGGGATCAAATATATGACGGGGTTACCTGATATTGTCATCATCGTTGATCAGC  
AAGAAGAATATACGGCTCTTCGAGAATGTCTGACTTTAGGAATCCGACGATTTGTCTAATCGATACAAATTGTGACCCA  
GATCTCGCGGATATTTGATTCCAGCCAACGATGACGCTATAGCCTCAATTCGATTGATTCTTAACAAATTAGTATCCGC  
AATTTGTGAGGGTCTGTTCTAGCTCT-----ATAAGAAAT-----  
-----

ATGGGCCAAAAATAAATCCACTTGGTTTTCCGACTTGGTGGAGAAAACCAAAGCATAGATCCCTTTGGTTCGCACAACC  
AAAA---AGTTATTCCATAGGTCTCCAGGAAGATGAAAAATACGAGATTGTATCAAGAATTATGTACAA---  
AAAAAAAAAATATGAGAATATCCTCA-----  
-----GGTTTTCGAAGGA-----  
ATTGCACATATAGAGATTAATAAAAAAATCGATCTGATCCAGGTCATAATCTATATTGGATTCCCAAAT-----  
-----TTGTTAATAGAGGGTTCGAACACGA-----GGAATC-----  
GAAGAATTACAGATCAATGTACAAAAAGGATTT---  
CATTCTGTGAACCGGAGACTTAAACATTGCTATCACAAGAGTTGCAAAACCTTATGGACAACCTAATATTCTTGCAGAATA  
TATAGCTCTACAATTAAGAATAGAGTTTCTTTTCGAAAGGCAATGAAAAAGCTATTGAATTAAGTGAACAAGCGGATA  
CAAAGGA---ATTCAAGTGCAAATTGCAGGGCGTATCGACGGAAAA-----  
GAAATTGCACGTGTCGAATGGATCAGAGAAGGTAGGGTCCCCTACAACTATTTCGAGCTAAAATTGATCATTGTTCTTA  
TACAGTTTCAACTATCTATGGGGTATTAGGCATCAAATTTGGATATTTGTAGACGAGCAA---  
ATGTCTCGTTACCGAGGGCCTCGTTTTCAAAAAAATACGCCGTCTGGGGGCTTTACCGGGACTAACTAGT-----  
AAAAGACCT-----  
AGACCCGGAAGTGATCTTAGAAACCAATCGCGTTCCGGG-----AAAAGA---  
TCTCAATATCGTATTCGTCTAGAAGAAAAACAAAATTGCGTTTTTATTATGGTCTGACAGAGCGACAATTACTTAGATA  
TGTTTCGTATCGCTGGAAAAGCCAAAGGGTCAACAGGTCAGGTTTTACTACAACACTACT

Lotus

-----  
AAAAAATATTTTGTGGTTTCGACCTGTAATTCTATATGATATAGCGGACAGTATCAAT-----  
TTAGTAAAACTTTTTCCCAAGATCTGTTCAAGGAATGGGATAATCTCGAACTTAAAGTTCTAAATTTTATCCTTTATGG  
AAATGGGAAATCAATTCGTGGAATTTTGGAC-----  
ACAAGTATTCAATTAGTTCGAACTTGCTTAGTCTTGAATTGGAATGAAGAC-----GAAAAAGTTCTTCTATT-----  
-GAG---  
GAGGCCCTCGCTTCTTTTGTGGAAGTAAGTACAAATGGTTTTGATTTCGATATTTCTTAAGAATTGACTTAGTTAAATCTCA  
TATTTTCATAT-----ATC---CGAAAAAGAAATGATCCGTCTAGTTTCAGGGTTGATTTTCATAC-----  
AATGAGTCGGATCGTATCAATATC---AATCCATTTTTTTCTATT-----TACAAGGAA---AATATT---  
CAACAATCACTTAGCCAAAAG-----CACGGAAT-----  
ATTCGTATGTTGTTGAATAGAAATAAGGAAAACCGA-----



TACAGTTCGAACTATTTATGGCGTATTAGGGATCAAAGTTTGGATATTTTTAAACAAAGAA---  
ATGTCACGTTACCGAGGGCCTCGTTTCAAAAAGATACGCCGTCTGGGGGCTTTACCGGGACTAACCAGT-----  
AAAAGGCCT-----  
ACAGTCGGAAGCGAACTTAGAAATCAATCGCGCTCCACT-----AAAAAA---  
TCTCAATATCGTATTCGTTTAGAAGAAAAACAAAATTGCGCTTTTCATTACGGTCTTACGGAACGACAATTGCTTAAATA  
CGTTTCGTATCGCTGGAAAAGCAAAAGGGTCAACTGGTCAGGTTTTACTACAATTACTT

Morus

-----  
AAAAAATATTTTGTGGTTCGGCCTGTAATCATATATGAAATAGCGGACGGTATAAAT-----  
TTAGAAACACTTTTCCCCAGGATCCGTTGCAGGAAAAAGATAATTTAGAACTTAGAGTTGTAAATTATATTCTTTATGG  
AAATGGCAAACCCATTTTGGGAATTTCCGGA-----  
ACCTGTATTCAATTAGTTCGGACTTGTTTAGTGTGAACTGGGACCAAGGC-----AACAAAAGTTCTTCTAGC-----  
-GAA---  
GAAACCCACGCTTCCTTTGTGGAAGTAAGTACAAGAGATCTGATTCGAGATTTCTAAGAATCAACTTAGTGAAATCCCA  
TATTTTCGTAT-----ATC---AGAAAAAGAAATGATCCGTTAGGGTCCGTATTGATCTCTGAT-----  
AATAGGTCAGATCGTACCAAT-----CCATTTTATTCTATTTAT-----TCCAAGGAA---AAGATT---  
CGACAATTACTTAAAGAAAAAT-----CAAGGAACT-----  
ATTCATACGTTGTTGAATAGAAGTAAGGAATCTCAA-----  
TCTTTAATAATTTTGTTCATCATCTAATTGTTTTGAAATGGGT-----CCATTC-----AACGATGTA---  
AAACATTAC-----AATGTGATAAAA---GAATCAATT-----AAAAGA-----

-----  
-----GATCCTCTAATTCGAATT-----AGGAATTCCTTAGGCCCTTTAGGAACA--  
-GCCTGTCAAGTTGCAAATTTT---TAT---TACATT-----TTAAAACTCATAATCAGATC---  
TCGGTAACTAAAAATTTGCAACTTGAAAAT-----TTAAAACAGACCTTTCAA-----GTACTT-----

-----  
AAATATTATTTAATGGACGAAAACGGGAGAAATTTATAATTCGGATCCATGCAGTAACATCCTTTTTAATCCATTCAACT  
GAATTGGCATTCTCCATCATAAT-----TATTGTGAAAAA---AAATCCACA-----  
ATAATTAGCCTTGGGCAGTTTTTTTTTCGAA-----AATGTATGTATAACC-----AAACATGGACCA-----  
CACCTAAAA-----

TCAGGTCAAGTTATAATTGTTCAAATTGACTCTGTAGTAATAAGATCGGGCGAAGTCTTATTTGGCCACTCCAGGAGCAAC  
TGTTTCATGGACATTATGGCGAAATACTCTCCGAAGGAGATACATTAGTTACATTTATATATGAAAAATCGAGATCGGGTG  
ATATAACG---  
CAGGGTCTTCCAAAAGTGGAAACAAGTGTAGAAAGTGCCTCAATTGATTCAATATCAATGAACCTAGAAAAGAGAGTTGA  
GGGTTGGAAC---  
GAACGTATAACAAGAATTCCTGGAATTCCTGGGGATTCTTGATTGGTGCTGAGCTAACTATAGTGCAAAGTCGTATCTC  
TTTAGTTAATAAGATCCAAAAGGTTTATCGATCCCAGGGTGTGCAGATCCATAATAGACATATAGAAATTATTGTGCGTC  
AAATAACATCAAAGTGTGGTTTTCAGAAGATGGAATGTCTAATGTTTTTTTACCCGGAGAATAATTGGATTGTTTCGA  
GCGGAACGAACGGGGCGTGCTTTGAAAGAAGCGATTTGTTACCAAGCTATATTATTGGGAATAACGAAAGCATCTCTAAA  
TACTCAAAGTTTCATATCCGAAGCGAGTTTTCAAGAACTGCTCGAGTTTTAGCAAAGCCGCTCTACGCGGTCGTATCG  
ATTGGTTGAAGGGTCTGAAAGAGAATGTTGTTCTAGGGGGGATGATACCCGTTGGTACCGGATTC---  
AAAGGATTAGTGCACCGTTCA-----AAGCAGCATAATAACATTCCT-----TTGGAA-----ACCAAA--  
-----AAGAAGAATTTA-----TTTGAGTGCGAAATGAGA---GATATTTTGTTCACCACAAA-----  
GAATTATTT-----GATTTTTGCATTTCAACC-----AATATACATGATACATCAGAACAACCTTA-----  
-----TTTCTA-----GGATTTAATGATTCTTAA-----

-----  
ATGACAAGACGATACTGGAACATCAATTTGGAAGAGATGATGGACGCAGGAATTCATTTTGGTCATGGTACTAGGAAATG  
GAATCCTAAAAATGGCACCTTATATCTCTGCA-----  
AAGCGTAAAGGTATTCATATTATAAATCTTACTAGAACGGCTCGGTTTTTATCAGAAGCTTGTGATTTAGTTTTTGTATGC  
AGCAAGCAGGGGAAAACAATTCCTAATTGTTGGTACCAAAAATAAAGCAGCTGATTCAGTAGCACAGGCTGCAATAAAGG  
CTCGGTGTCATTATGTTAATAAAAAATGGCTTGGTGGTATGTTAACGAATTGGTATACTACAGAAACGAGACTTCATAAG

TTCAGGGACTTGAGAACGGAACAAAAACAGGCAGACTCAAACGCCTTCCGAAGAGAGATGCGGCTGTGTTGAAGAGACA  
AATATCTCACTTGCAAACATATCTGGGCGGGATTAAATATATGACAGGGTTACCTGATATTGTAATAATTGTTGATCAGC  
AAGAAGAATATACGGCTCTTCAAGAATGTATCACTTTGCGAATTCCAACGATTTGTTTAATCGATACAAATTGTGACCCG  
GATCTAGCAGATATTTCTATTCCAGCGAATGATGACGCTATAGCTTCAATCCGATTAATTCTTAACAAATTAGTATTTGC  
AATTTGTGAGGGTCGTTCTAGCTAT-----ATACGAAATTCCTGA-----  
-----ATGGGACAAAAATAAATCCGCTTGGTTTCAGACTTGGT---  
GCAACCCAAGGTCATCATTCCCTTTGGTTTGACAACCAAAA---  
AATTATTCCGAGGATCTACAAGAAGATCAAAAAATACGAGATTGTATCAAGAATTATATAAAA---AAA-----  
AATATGAAAATTTTTTCT-----  
-----AGTGTGCGAGGGA-----  
ATTGCATGTATAGAGATTCAAAAAGAATCGACTTGATTCAAGTCATAATCTATATGGGATTCCCAAAG-----  
-----TTATTAATAGAACATCAA-----AAAATC-----  
GAAGAATTACAGATGAATATACAAAAAGAACTT---  
AATTCTGTGAACCGTAAACTAAACATGGCTATTACAAGAATTGCAAATCCTTACGGACACCCTAATATTCTTGAGAATT  
TATAGCCGGACAATTAAAAAATAGAGTGTCTATTCCGCAAAGCAATGAAAAAGCTATTGAATTAAGTGAACAGGCAGGTA  
CAAAAGGA---ATTCAAATACAAATTGCAGGGCGTATCGACGGAAAA-----  
GAAATTGCACGTGTGCAATGGATCAGAGAAGGTAGGGTGCCTCTACAAACCATTAAGGCTAAAATTGATTACTGTTCTTA  
TACAGTTCGAACTATCTATGGGGCTTTAGGTATCAAAATTTGGATATTTGTAGACGAGTAA---  
ATGTCACGTTACCGAGGACCTCGTTTCAAAAAAATACGTCGCTGCGGGGCTTTACCGGGACTAACTAGT-----  
AAAAAGCCT-----  
AGAGCTGGAAGCAATCTTAGAAACCAATTACGCCCCGGT-----AAAAAA---  
TCTCAATATCGTATTCGTTTGAAGAAAAACAAAAATTGCGCTTTTATTATGGTCTTACAGAACAACAATTACTTAAATA  
CGTTTCGTATAGCCGAAAAGCAAAAGGGTCAACAGGTCAAGTTTTACTACAATTACT  
Nandina -----

-----  
AAAAAGTATTTTGTGTTTGGTTCGACCCGTAGTTACATATGAAATAGCAGATGGGATAAAT-----  
TTAGCAACGCTTTTTCCCCAGGATCCATTGCAGGAAAGGGATAATGTGCAACTTCGAGTTGTTAATTATATCCTTTATGG  
AAATGGTAAACCAATTTCGAGGAATTTCTCAT-----  
ACAAATATTCAATTAGTTTCAACTTGTGTTAGTATTGAATTGGGACCAAGAA-----AAAAATGGTTCGTCTATG-----  
-GAG---  
GAGGTTTCATGCTTCCCTTTGTTGAAGTAAGGGTAAATAATCTGATTTCGAGATTTTATAAGAATGGACTTAGTGAAGTCCCC  
TATTTTCGTAT-----ACC---AGAAAAAGGAATGCTCCGGCAGGGTCAGAATTAATCCTCGCT-----  
AATGGATCAGATTACACAAATCTC---AATCCTTTTTAT-----TCCAAGGCA---AGGATT---  
CAACAATCACTTACCCAACAT-----CAAGGAACT-----  
ATTTCGTACGTTATTGAATAGAAATAAGGAATGCCAA-----  
TCCTTGATATTTTTGTTCATCATCTAATTGTTTTCGAATAGGT-----CCATTC-----AAGGGTTTG---  
AAATATAAC-----AATATGACAAAA---AAATCAAAT-----AAAAGG-----  
-----

-----GATTCCTACTTCTAATT-----AGGAATTCGTTGGGTCCCTTTAGGGATT--  
-GTCCCTAAAATTGCGAATTTT---TCT---TCATTT---TACTATTTAATAACTCATAATCAGATC---  
TTGATAAATAAATATTTGTTACTTGACAAT-----TAAAACAGACTTTCCAA-----AAACTC-----  
-----

AAATATTATTTAATGGATGAAAATGGGAGAATTTATAATCCCGACCCGTGCAGTAACATGATTTTGAATCCATTCAATTG  
GAATTGGTATTTTCTCCATCAGAT-----TATTGTGAAGAA---ACATCGACA-----  
ATAATTAGCCTTGACAATTTTTTTGTGAA-----AATGTATGTATATCT-----AAATACGGACCA-----  
CATCTAAAA-----  
TCTGGCCAGGTTATAATTGTTTCATGTTGACTCTTTAGTAATAAGATCAGCTAAGCCCTATTTGGCTACTCCAGGAGCAAC  
CGTTTCATGGCCATTATGGGGAAATACTTTACAAAGGAGATACATTAGTTACATTTATATATGAAAAATCGAGATCTGGTG  
ATATAACA---  
CAAGGTCTTCCAAAAGTAGAACAAGTGTGTAAGTCCGTTTCGATCGATTCAATATCAATGAACTTAGAAAAGCGGGTTGA  
AGGTTGGAAC---  
GAACGTATAACAAGAATTCCTTGGGATTCCCTTGGGGATTCTTGATTGGCGCTGAGCTAACCATAGCGCAAAGTCGTGTCTC  
TTTGGTTAATAAGATTCAAAAGGTTTATCGATCCCAGGGAGTGCAGATCCATAATAGGCATATAGAAATTATTGTACGTC  
AAATAACATCAAAAGTGTGGTTTTCAGAAGATGGAATGTCTAATGTTTTTTTACCTGGCGAACTAATTGGGTTGTTGCGC  
CGGAAACGAACGGGGCGCGCTTTGGAAGAAGCGATTTGTTACCGAGCCGCTTATTGGGAATAACGAGGGCGTCTCTGAA

TACTCAAAGTTTCATATCTGAAGCGAGTTTTCAAGAAACCGCTCGAGTTTTAGCAAAGCAGCTCTACGAGGTCGTATCG  
ATTGGTTGAAGGTCTGAAAGAGAACGTTGTTCTGGGGGGTATGATACCTGTTGGTACCGGATTC---  
AAAGGATTAGTGCACCGTTCC-----AGTCAACACAGCAACATTTCT-----TTGGAA-----ATCCAA--  
-----AATACGAATCTA-----TTCGAAGGGGGCATGCGA---GATATTTTGTTCACCACAGA-----  
GAATTATTT-----TATTCTTGTATTCCAAAG-----AATTTCCATGATACATCAGAACAAAA-----  
-----TTTACA-----GGATTTATTGATTCTAA-----  
-----  
-----  
-----  
-----  
-----

ATGACAAGAAGATATTGGAACATCAATTTGGAAGAGATGATGGAAGCAGGAGTTCATTTTGGTCATGGTACTAGGAAATG  
GAATCCTAGAATGGCACCTTACATCTCTGCA-----  
AAACGTAAAGGTATTCATATTACAAATCTTACTAGAACTGCTCGTTTTTTATCAGAAGCTTGTGATTTAGTTTTTGATGC  
AGCAAGTAGAGGAAAACAATTCTTAATAGTTGGTACCAAAAATAAAGCGGCTGATTCAGTAGCATCGGCTGCAATAAGGG  
CTCGATGCCATTATGTTAATAAAAAATGGCTCGGTGGTATGTCAACGAATTGGTCCACTACGGAAACGAGACTTCATAAA  
TTCAGGGACTTGAGAGCGGAACAAAAGACGGGAAGATTCAATCGTCTTCCGAAAAGAGATGCAGCAATGTTGAAGAGACA  
ATTATCTCACTTGCAAACATATCTGGGTGGCATCAAATATATGACCGGGTTGCCAGATATTGTAATCATCGTTGATCAGC  
AAGAAGAATATACGGCTCTTCGAGAATGTGTCACTTTGGGAATTCACAATTTGTTAATCGATACAAATTGTGACCCG  
GATCTCGCAGATATTTTCGATTCGCGCAATGATGACGCTATAGCTTCAATCCGATTCATTCTTAACAAATTAGTATCCGC  
AATTTGTGAGGGTCGTTCTAGCTAT-----ATAAGAAATCGT-----  
-----ATGGGACAAAAATAAATCCACTTGGTTTTAGACTTGGT---  
ACAACCCAAAGTCATCATTCCCTTTGGTTTTGCACAACCAAAA---  
AATTATTCTGAAGGTCTACAGGAAGATCAAAAAATACAGGATTGTATCAGAAATTATGTACAA---AAA-----  
AATATGAGAATCTCCTCT-----  
-----GGTGTGAGGGA-----

ATTGCACGTATAGAGATTCAAAAAGAATCGATCTGATCCAGGTCATAATATATATGGGGTTTTCCAAAA-----  
-----TTGTTAATAGAGGGTAGATCACGA-----GGAATC-----  
GAAGAATTACAGAGCAGTGTACAAAAAAGATTT---  
AATTCTGTAAACCGAAAACCTTAACATTGCTATCACAAGAATTGCAAAACCTTATGGACACCCTAACATTCTTGAGAATT  
TATAGCCGGACAATTAAGAATAGAGTTTCATTTTCGAAAGGCAATAAAAAAGCTATTGAATTAACGGAACAAGCGGATA  
CAAAAGGA---ATTCAAGTCCAAATAGCGGGCGTATCGACGGAAAA-----  
GAAATTGCACGTGTGAATGGATTAGAGAAGGTAGGGTTCCCTACAAACCATTTCGAGCTAAAATTGATTATTGTTCTTA  
TACAGTTCGAACTATTTATGGGGCATTAGGCATCAAAATTTGGATATTTACAGACGAGGAG---  
ATGTCTCGTTACCGAGGGCCTCGTTTTAAAAAATACGCCGTCTGGGGGCTTTACCGGGACTTACTAGT-----  
AAAAGCCT-----  
ACGCCCGGAAGTGATCTTCGAAACCAATCGCGTTCCGGG-----AAAAGA---  
TCTCAATATCGTATTCGTCTAGAAGAAAAACAAAAGTTGCGGTTTTATTATGGTCTGACAGAGCGGCAATTACTTAAATA  
CGTTTCGATTGCGGGAAAAGCCAAAGGCTCAACAGGTCAGGTTTTACTACAATTACTC  
Nicotiana-----  
-----

AAAAAGTTTTTTGTTTTAGTTTCGACCTGTCGTACATATGAAATAACGGACGGTATAAAT-----  
TTAGCAACCCTTTTTCCACCGGATCCATTGCAGGAAAGGGATAATGTGCAACTTCGAATTGTCAATTATATCCTTTATGG  
AAATGGCAAACCGATTTCGAGGAATTTCTGAC-----  
ACAAGTATTCAATTAGTTTCGGACTTGTTTAGTATTAATTTGGAACCAAGAC-----AAAAAAGTTCTTCTTGC-----  
-GAA---  
GAAGCCCGTGCTTCTTTTTGTTGAAATAAGGACAAATGGTTTTGATTTCGACATTTCTAAGAATCAACTTAGTGAAATCCCC  
TATTTCTGAT-----ATC---GGAAAAAGGAATGATCCGTCGGGGTCAGGATTGCTCTCTGAT-----  
AATGGATCAGATTGTACCAATATC---AACCCTTTTCTTCCATTTATTCTAT---TCCAAGGCA---AAAATT---  
CAACAATCTATTAACCAACT-----CAAGGAACT-----  
ATTCATACGTTGTTAAATAGAAATAAGGAATGTCAG-----  
TCGTTGATAATTTGTCAGCAGCCAATTGTTCTCGAATGGGG-----CCATTC-----AAGGATGTA---  
AAATATCAC-----AGTGTGATAAAA---AAATCAATT-----AAAAAA-----  
-----  
-----  
-----GATCCCTAATTCCAATT-----AGGAATTCATTGGGCCCTTTAGGAACA-----



Nuphar

-----  
 AAAAAATATTTTGTTCAGTACGACCCGTAGTGACATATGAAATAGCTGACGGGATAAAT-----  
 CTAGTAACGCTTTTCCCCAGGGATATGTTACAGGAAAAGGAGAATTTGCGACTCCGAGTTGTCAATTATATCCTTTATGG  
 GGATGGCAAACCAATTCGAGGAATTTCCCAC-----  
 ACAAGTATTC AATTAGTTCGACTTGTTTAGTATTGAATTGGGACCAAGAC-----AAAAAAGGT---TCTATA-----  
 -GAA---

-----  
 AAGGTTCAAGGCTTCTTCTGCTGAAGTAAGAGCAAATGATCTGATTGATATTTTCATAAGAATTGATTTGGTGAAGTCTCC  
 TATTTTGTAT-----ACT---GGAAAGAGGAATGATAGGGCAGGTTCA---GTGATTCTGAT-----  
 ACTGGGTCATATTGCGCCAATACC---AATCTTTTTTCT-----TCCAAGGTG---AAGATG-----  
 -AAATCACTTAGTCAACAT-----CAAGGAACC-----  
 GTTCATACATTTCTTAATAGAAATAAGGAAGGCCAA-----  
 TCCCTTATAGTTTTTTCATCATCCAATTGTTCTCGCATC-----AATGTTTTCA---  
 AAATATCAC-----AATGTGACCAA---GAATCAATT-----AAAGAAAAAGAG-----  
 -----

-----  
 -----GATCCCCTGATTCCAATT-----CTGAATTCGTGCGGTCCCTTAGGTACT--  
 -GTACCTAAAATTTATAATTTT---TCC---TCATCT---TATCATTCAATAACTCATAATGAGATC---  
 CTATTAATAAATATTTACTACTGGATAATAATAATCCAAAACAGACTTTCCAA-----CTACTT-----  
 -----

-----  
 AAATATTATTTAGTGGATGAAAACGGGAGAATCTCTAATCCAAATCCATGCAGTGACATCATTTTAAATCTATTGATTC  
 GAATTCGTGCTTTCTCCCTCACGAT-----  
 -----TATTGTGAGGGG---

-----  
 ACATCCACAACCAATAATTAGCCTTGGACAGTTTATTTGTGAA-----AATGTATGTCTATCC-----  
 AAACACGGGAACA-----CGCATAAAA-----  
 TCTGGTCAAGTTATAATGGTTTATGTTGACTCTTTTCATAATAAGATCAGCTAAACCCTACTTGGCCACCCGAGGAGCAAC  
 CGTTTCATGGTGATTATGGAGAAATCTTTTACGAAGGAGATACATTAGTTACATTTATATATGAAAAATCGAGATCTGGTG  
 ATATAACT---

-----  
 CATGGCCTTCCAAAGGTTGAACAAGTGTTAGAAGTTGTTCAATTGATTCAATATCGATGAACCTAGAAAAAAGGGTTGA  
 AGTTTGAAC---

-----  
 GAACATATAACAGGAATTCCTTGAATTCCTTGGGGATTTCCTGATTGGTGCTGAACTCACCATAGCGCAAAGTCGTATTTT  
 TTTGGTTAATAAGATCCAAAAGGTTTATCGATCCCAGGGGTACAGATTCATAATAGGCATATAGAGATTATTGTACGAC  
 AAATAACATCAAAGTGTTGGTTTTCAGAAGATGGAATGTCTAATGTTTTTTCACCCGGGAACTAATCGGATTGTTGCGA  
 GCAGAACGAGCAGGTGCTGCTTTGGAAGAGGCTATTTGTTACCGAGCCGTCTTATTGGGAATAACGAGAGCATCTCTGAA  
 TACTCAAAGTTTCATATCAGAAGCTAGTTTTTCAGGAAACCGCTCGAGTTTTAGCAAAGCCGCTCTCCGGGGTCTGATTG  
 ATTGGTTGAAAGGCCTGAAAGAGAATGTTGTTCTGGGGGGGATGATACCCGTTGGTACCGGATT---

-----  
 AAACGATTGTTTACCAGTTCA-----AGGAATAACAACAACATTCCT-----TTGGAA-----ATACAA--  
 -----AGAAGAATCTA-----TTCGGGGGGGAAATGAGA---GATATTCTGTTCCACCACAGA-----  
 GAATTATTT-----GGTCTTGCATCCCAAAGCCAAAG-----AGTTTCCATAATACATCAGAACAACCA-----  
 -----TTCTAT-----GGGATC-----  
 -----

-----  
 ATGACAAGAAGATATTGGAACATCAGTTTTGGAAGAGATGATGGAAGCGGGGTTTATTTTGGTTCATGGTACTAGGAAATG  
 GAATCCTAGAATGGCACCTTACATCTCTGCA-----

-----  
 AAGCGTAAAGGTTATTCATATTACAAATCTTACGAGAAGTCTGTTTTTTTATCAGAAGCCTGTGATTTAGTTTTTGACGC  
 AGCAAGTAGAGGAAAACACTTCTTAATAGTTGGTACGAAAGATAAAGCAGCTGATTCCGGTAGCATCAGCTGCAATAAGGG  
 CTCGGTGTCATTATGTCAATAAAAAATGGCTCGGTGGTATGTCAACGAATTGGTCCACTACAGAAACGAGACTTCATAAG  
 TTCAGGGACTTGAGAGTGAGAGCCGAGATGGGGCAACTCAGTCGTCTCCCGAAACGGGATGCAGCAATATTGAAGAGACA  
 ATTATCTCACTTTCAAACATATCTGGGTGGTATCAAATATATGACGGGGTTACCCGATATTGTAATCATCATTGATCAGC  
 AAGAAGAATATACGGCCCTTCGAGAATGCGTCACTTTGGGTATTCCAACATTTGTTAATCGATACAAATTTGTGATCCA  
 GATCTCGCAGATATTCGATTCCAGCCAACGATGACGCTATAGCTTCCATCCGATTGATTCTTAACAAATTAGTATCCGC  
 AATTTGTGAGGGACGTTCTAGCTATAGCTATATAAGAAGTCGT-----  
 -----ATGGGACAGAAAATAAATCCACTTGGTTTTAGACTTGGT---



ACAACCCAAAGTCATCGTTCCTTTTGGTTCGCACAACCAAAA---  
AATTATTCTAAAGGTCTCCAGGAAGATGAAAAAATACGGGATTGTATCAAGAATTATGTACAA---AAA-----  
CATATGAGAATATCCTCA-----  
-----GGTTTTGAGGGA-----  
ATTGCACGTATAGATATTAATAAAGAATTGATTTGATCCAAGTCATAATTCATATTGGATTTCGCCAAT-----  
-----ATGTTAATAGAGGGTAGAGCCCGA-----GGAATC-----  
GAAGAATTACAGACTAATGTACAAAAAGCTTT---  
CATTCTGTGAACCGGAGACTCAACATTGCTATCGCAAGAGTTCCAAGACCTTACGGGCAACCTAATATTCTTGCAGAATA  
TATCGTCTGCAATTAAGAATAGAGTTTCTTTTCGAAAGGCAATGAAAAAGCTATTGAATTAGCTGAACAAGCAGATG  
CAAAGGGA---ATTCAGGTACAAATTGCAGGACGTCTCAACGGAAAC-----  
GAAATTGCCCGCGTTGAATGGATTAGAGAGGGTAGGGTTCCTTACAGACCATTTCGAGTTAAAATTGATCATTGTTCTTA  
TCCAGTTCGAACCTATCTATGGAGTATTAGGGATCAAAATTTGGATATTTTTGGATGAAGAG---  
ATGTCTCGTTACCGAGGACCTCGTTTTAAAAAATACGCCGTCTGGGGGCTTTGCCGGGACTAACTAGT-----  
AAAAAACCT-----  
AGATCTGCAAGTGATCTTAGAAACCAATCCCGCTCTGGG-----AAAAGA---  
TCTCAATATCGTATTCGTTTGAAGAAAAACAGAAATTGCGTTTTTATTATGGTCTGACGGAGCGACAACACTACTTCGATA  
TGTTTCGTATCGCTGGAAAAGCAAACGGTTCAACAGGCCAGGTTTTACTGCAACTACTT  
Nymphaea

-----  
AAAAAATATTTTGTTCAGTACGACCCGTAGTGACATATGAAATAGCTGATGGGATAAAT-----  
CTAGTAACGCTTTTCCCTGGGGATATGTTACAGGAAAAGGATAATTTGCGACTCCAAGTTGTCAATTATATCCTTTATGG  
GGATGGCAAACCAATTCGAGGAATTTCCCAT-----  
ACAAGTATTC AATTGGTTTCGTACTTGTTTAGTATTGAATTGGGACCAAGAC-----AAAAAAGGT---TCTATA-----  
-GAA---  
AAGGTT CAGGCTTCTTCTGCTGAAGTAAGGGCAAATGATCTGATTCGATATTTTATAAGAATTGATTTGGTGAAGTCTCC  
TATTTTGTAT-----ACC---GGAAAGAGGAATGATAGGT CAGGTTCA---GTGATTCCTGAT-----  
ACTGGGT CATATTCGCGCAATACC---AATCTTTTTTCT-----TCCAAGGTG---AAAATT-----  
-AAATCACTTAGTCAACAT-----CAAGGAAC-----  
GTTTCGTACATTTCTTAATAGAAATAAAGAAGGCCAA-----TCTCTTATAGTTTTTTTCATCATCTAATTG-  
TCTCGCATC-----AATGTTTCG---AAATATCAC-----  
AATGTGACCAAA---GAATCAATT-----AAAGAAAAAGAG-----

-----  
GATACCCCGATTCCAATT-----CTTAATTTGTTGGGTCCCTTAGGTAAT---  
GTACCTAAAATTCATAATTTT---TCC---CCATCT---TATCATTCAATAACCCATAATGAGATC---  
TTGTTAAATAAATATTTAATACTGGATAATAAAAAATCCAAAACAGACTTTCCAA-----CTACTT-----

-----  
AAATATTATTTAGTGGATGAAAACGGGAGAATCTCTAATGCAAATCCATGCAGTGACATCATTTTTAATCTATTTCGGTTC  
GTGCTTTCTCCCTCACGATTATTGT-----  
-----GAGGGGACATCC---ACAACCAGA-----  
ATAATTAGCCTCGGACAGTTTATTTGTGAA-----AATGTATGTCTATCC-----AAACACGGAACA-----  
CGCATAAAA-----  
TCTGGTCAAGTTATAATGGTTTATCTTGACTCTTTCATAATAAGATCAGCTAAACCCTATTTGGCGACCCGAGGAGCAAC  
CGTTCATGGTGATTATGGAGAAATCTTTTACGAAGGAGATACATTAGTTACATTTATATATGAAAAATCGAGATCTGGTG  
ATATAACT---  
CACGGCCTTCCAAGGTTGAACAAGTGTTAGAAGTTTCGTTTCGATTGATTCAATATCGATGAACCTAGAAAAAAGGGTTGA  
AGGTTGGAAC---  
GAACATATAACAGGCATTCTTGGAAATCCTTGGGGATTCTGATTGGTGCTGAACTCACCATAGCGCAAAGTCGTGTTTC  
TTTGGTTAATAAGATCCAAAAGGTTTATCGATCCCAGGGGTACAGATTATAATAAGCATATAGAGATTATTGTACGAC  
AAATAACATCAAAGTGTTGGTTTTCAGAAGATGGAATGTCTAATGTTTTTCCACCGGGAACTAATCGGATTGTTGCGA  
GCAGAACGAGCAGGTCTGCTTTGGAAGAGGCTATTTGTTACCGAGCCGTCTTATTGGGAATAACGAGAGCATCTCTGAA  
TACTCAAAGTTTCATATCAGAAGCTAGTTTTTCAGGAAACCGCTCGAGTTTTAGCAAAGCCGCTCTCCGGGGTCTGATTG  
ATTGGTTGAAAGGTCTGAAAGAGAATGTTGTTCTGGGGGGGATGATACCCGTTGGTACCGGATTC---  
AAACGATTTCGTTACCGTTCA-----AGGGAATACAACAACATTCT-----TTGGAA-----ATACAA---  
-----AAGAAGAATTTT-----TTCGGGGGGAAATGAGA---GATATTCTGTTCCACCACAGA-----  
GAATTATTT-----TGTTCTTGCATCCCAAAGCCAAAG-----AGTTTCCATAATACATCAGAACAACCA-----  
-----TTCTAT-----GCTATGGGATCTAATCCAATCGTTTCATAAGAGCGGATTCAATTATTAGC-----

```

-----
-----
-----
-----
-----
-----
-----
-----
ATGACAAGAAGATATTGGAACATCAATTTGGAAGAGATGATGGAAGCGGGGGTTCATTTTGGTCATGGTACTAGGAAATG
GGATCCTAGAATGGCACCTTACATCTCTGCA-----
AAGCGTAAAGGTATTTCATATTACAAATCTTACGAGAAGCTGCTCGTTTTTTATCAGAAGCCTGTGATTTAGTTTTTTCAGCGC
AGCAAGTAGAGGAAAAACACTTCTTAATAGTTGGTACGAAAGATAAGGCAGCTGATTTCGGTAGCATCAGCTGCAATAAGGG
CTCGGTGTCATTATGTCAATAAAAAATGGCTCGGTGGTATGTCAACGAATTGGTCCACTACGGAAACGAGGCTTTCAGAAG
TTCAGGGACTTGAGAGTGAGAGCCGAGATGGGGCAATTCAGTCGTCTCCCGAAACGGGATGCAGCAATATTGAAGAGACA
ATTATCTCACTTTCAAACATATCTGGGCGGTATCAAATATATGACGGGGTTACCCGATATTGTAATCATCATTGATCAGC
AAGAAGAATATACGGCCCTTCGAGAATGCGTCACTTTGGGTATTCCAACATTTGTTTAATCGATACAAATTGTGATCCA
GATCTCGCAGATATTCCGATTCCAGCCAACGATGACGCTATAGCTTCCATCCGATTGATTCTTAACAAATAGTATCCGC
AATTTGTCTAGGGACGTTCTAGCTAT-----ATAAGAAGTCGT-----
-----ATGGGACAGAAAATAAATCCACTTGGTTTTTCAGACTTGGT----
ACAACCCAAAGTCATCGTTCCTTTTGGTTCGCACAACCAAAA----
AATTATTCCAAAGGTCTCCAGGAAGATGAAAAAATACGGGATTGTATCAAGAATTATGTACAA---AAA-----
CATATGAGAATATCCTCA-----
-----GGTTTTGAAGGA-----
ATTGCACGTATAGATATTAAAAAAGAATCGATTTGATCCAAGTCATAATTCATATTGGATTTCGCCAAT-----
-----ATGTTAATGGAGGGTAGAGCCCGA-----GGAATC-----
GAAGAATTACAGACTAATGTACAAAAAAGCTTT---
CATTCTGTGAACCGAAGACTCAACATTGCTATTGCAAGAGTTGCAAGACCTTACGGGCAACCTAATATTCTTGCAGAATA
TATCGCTCTGCAATTAAGAATAGAGTTTCTTTTCGAAAGGCAATGAAAAAGCTATTGAATTAGCTGAACAAGCGGATG
CAAAGGGA---ATTAGGTACAAATTGCAGGACGTCTCAATGGAAAC-----
GAAATGCCCCGCGTTGAATGGATTAGAGAAGGTAGGGTTCCTTCGACACCATTTCGAGTTAAAATTGATCATTGTTTCTTA
TCCAGTTTCAACTATCTATGGAGTATTAGGGATAAAAAATTTGGATATTTTTGGATGAAGAG---
ATGTCTCGTTACCAGGACCTCGTTTTAAAAAATACGCCGTCTGGGGGCTTTGCCGGGACTAACTAGT-----
AAAAAACCT-----
AGGTCCGCAAGTGATCTTAGAAACCAATCCCGCTCTGGG-----AAAAGA---
TCTCAATATCGTATTCGTTTAGAAGAAAAACAGAAATTGCGTTTTTCATTATGGTCTGACAGAGCGACAACACTACTTCGATA
TGTTTCGTATCGCTGGAAGCAAACGGTTTCGACGGGTCAAGTTTTACTGCAACTACTT
Oenothera
-----
-----
AAAAAGCATTTTTGTTTTATTTTCGGCCTGTAGTGACATATGAAATAGCGGACGGTCTCAAT-----
TTAGCAAGACTCTTCCCCCCGGATCTGTGCCAAGAAAAGGATAATATGCAACTTCAAATTGTCAATTATATTGTTTACGG
AAATGGCAAACCAATTTCGGGAAATTTCTGAC-----
ACAAGTATTCAATTAGTTTCGGACTTGGTTTCAATTTGAATTGGGACCAAGAC-----AAAAAAGTGCTTCTGCC-----
-GAG---
GCGGCCCACGCTTCCTTTGTGCAAGTAAGGGCAAAGGTCTGATTTCGAGATTTCTTAAGAATCGACTTAGTGAAATCCCC
TATTTTGGAT-----CCG---AGAAAAAGGAATGATCCGTTCAGGCTCAGGATTGATCTCTGAT-----
AATGTCTCAGATCACACTAATATC---AATCCCTTTTTAT-----TCCAAGCCA---AAGATG---
AAACAATCGCCTAGGCAAAAT-----CACGGAAC-----
ATTCGGACCTTGTTAAATCAAATAAGGAATGCCCG-----
TCTTTGATGATTTTTGTCCGCATCTAATTGGTTTTCGAATGGGT-----CCATTC-----AATGATGTA---
AAATCCCAG-----AATGTGATAAAA---GAATCAATT-----AAAAA-----
-----
-----
-----GATGCTATAATTCAAATT-----AGGAATTCAATTGGCCCTTTAGGAACA--
-GCCCTTCAAGTTGTGAACCTTT---GAT---TCATTT---TACTATTTTATAACTCATAATCAGGTC---
TTGCTAACTAAATATTTGCAAGTTGAAAAT-----TAAAAACAGACTTTTTCAA-----GTACTT-----
-----
CAATATTATTTAATGGATGAAAGCGGGAGGATTTATAATCCGGATCCCCCGCAGTAACATCGTTTTGAATTCATTCAATTT
GAGTTGGTATTTTCTGCCTCACAATAATTAT-----GAAAAAT-----
-----TCTTGTAAGAA---ATATCTACA-----

```

ATAGTTAGTCTTGGACAGTTTTATTTGTGAA-----AATGGATGTATAGCC-----AAAAATGGACCA-----  
TACCTAAGA-----  
TCGGGTCAAGTTTTGATTGTTCAACTTGACTCTGTAGTAATAAGATCTGCTAAGCCTTATTTGGCCACTCCAGGAGCAAC  
TGTTTCATGGACATTATGGAGAAATCCTTTATGACGGAGATACAGTAGTGACATTTCTATATGAAAAATCGAGATCCGGTG  
ATATAACG---  
CAGGGTCTTCCAAAAGTGAACAGGTGTTAGAAGTGCCTCAGTTGATTCAATATCGGTGAACCTAGAAAAAGAGTTGA  
GAATTGGAAC---  
GAGCATATAACAAGAATTCTTGGATTTCTTGGGGATTCTTGATTGGGGCTGAGCTAACTATAGTGCAAAGTCGGATCTC  
TTTGGTTAATAAGATCCAAAAGGTTTATCGATCCCAGGGGGTCCAAATCCATAATAGGCACATCGAAATTATTGTACGCC  
AAATAACATCCAAAAGTGTGGTTTCAGAGGATGGAATGTCTAATGTTTTTTACCTAGAGAATAATTGGATTGTTGCGA  
GCGGAACGGACGGGGCGCGCTTTGGAAGAATCGATCTGTTACAAGGCTTCTCTATTGGGAATAACAAGAATCTTTGAA  
TACTCAAAGTTTTCATATCCGAAGCGAGTTTTCAAGAACTGCTCGAGTTTTAGCTAAAGCGGCTCTCCGGGGTCGTATTG  
ATTGGTTGAAAGGCCTAAAAGAGAAGCTTGTATAGGCGGGATGATACCCGTTGGGACCGGATTC---  
AAGGGCTTAGTACACTGTTCC-----AAGCAACATAAAAGCATTCCC-----AAG--  
-----AATAAGCACTTT-----TTCGAGGGGGAGATCAGA---GATATTTTGTTCACCACAGA-----  
GAATTATTT-----GATTCTTGCATTTCAAAG-----AATTTCCACGATACACCAGAA-----  
-----  
-----  
-----  
-----  
-----  
-----  
-----  
-----

ATGACAAGAAGATATTGGAACATCAATTTAGAAGAGATGATGGAAGCAGGAGTTTATTTTGGTCATGGTATTAATAAATG  
GAATCCTAGGATGGCGCCTTATATTTATGCC-----  
AATCGTAAAGGTATTCATATTACAAATCTTACTAAAACCGCGCTTTTTTAGCAAAAGCTTGTGATTAGTTTTTGTATGC  
AGCAAGCCGGGGGGGGCAGTTTTTAATTGTTGGTACCAAAAAGCAAGCAGCTGCTTTAGTAGCACGGGTGCAATAAAGG  
CTCAGGGTCAATTATGTTAATAAAAAGTGGCTTGGTGGTATGTTAACGAATTGGTCCACTACAGAAACGAGACTTCATCAG  
TTCAGGGACTTGAGAACGGAACAAAAGACAGGGAGACTTAACCGTCTTCCAAAAGAGACGCGGCTATATTGAAGAGACA  
ATTATCTCACTTGCAAACATATCTGGGTGGGATTAATATATGACCGTTTTGCCGATATTCTAATTATCCTTGATCAGC  
ATGAAGAATATACGGCTCTTCGAGAATGTATTACTTTGGGAATCCAACAATTTGTTAATCGACACCGATTGTGACCCC  
GATCTTGAGATCTTCCGATTCCAGCAAATGATGACGCTATGGCTTCAATCCGATTAATTCTTAACAAATTAGTATTCGC  
GATTTGTGAGGGTCGTTCTAGCTCT-----ATACGAAATCCT-----  
-----ATGGCCCAAAAATAAATCCCCTCGGTTTCAGACTTGGT---ACAACCTCAA-  
GTCATCATTGATTG--GTTGCACAACCAAAA---  
GATTATTCTGACGGTCTACAAGAAGATCAAAAAATACGAGATTGTATCCAAAATTATATACAA---AAA-----  
AATATGCAAATATCCTCGGATTTCG-----  
-----GGTGTGAGGGG-----  
ATTGCCCGAATAGAGATTGCAAAAAGAATTGATCTGATTCAAGTCAAATCTATATGGGATTCCCAAAG-----  
-----TTATTAATAGAAGATGGGACACGA-----AGAATC-----  
GAAGAATTACAGAGGATTGTACAAAAGAAATC---  
AATTCTGTGAACCGAAAAATCAACATTACTATTACAAAATTACAAAACCTACGGAGACCCCAATATTCTGGCAGAATT  
TATAGCCGGACAATTAATAATAGAGTTTCTTTTCGCAAAGCAATCCAAAAGGCTATTGAATTAGCCGAACAGGCGGATA  
CAAAGGA---ATTGAGTACAAATTGGAGGGCGCATCAACGGAGGA-----  
GAGATAGCACGTGTCCTATGGATGAAAGAAGGTGCGGTTCTCTACAAACCATTGAGCTAAAATTGATTATTGTGTCTA  
TACAGTCCGAACTATCCATGGGCTATTAGGCATCAAATTTGGATATTTAGAGAGGAT-----  
ATGTCGCGTTACCGAGGGCCTCGTTTTCAAAAAAATACGCCGTCTGGGGGCTTTACCCGGACTAACCAGT-----  
AAAAGGCCT-----  
AGAGCCGGAAGTGATCCGAGTCGCCAAGGCCTTTCTGGG-----AACAAA---  
TCTCAATATCGTATTCGTTTAGAAGAAAAACAAAAGTTGCGTTTTATTATGGTCTTACAGAACGACAATTGCTTAAATA  
CGTTTCGTATCGCCGAAAAGCCAAAGGGCCAACAGGTTCAGGTTTTACTGCAATTACTT

Oryza

-----  
GAAAAGTATTTTGTGGTTCGACCTGCAGTCGCGTATGAAATGAACGAAGGGAGAAAT-----  
TTAGCAACACTTTTCCACAGGATCTCTTCGAGGAAGAGGGTAATCTCCAACCTCGACTTGTCAATTTTATTTCTCATGA  
AAATAGCAAGTTAACTCAAAGAATTTATCAT-----  
ACGAATAGTCAATTCGTTGCAACTTGCTTAGTATTGAATTGGGAACAAGAA-----GAAAAA-----

-GAG---

GAGGCTCGTGCTTCCCTTGTGAGATAAGAGCAAATGGTCTGATTTCGCGATTTCTAAGAATTGGGTTAATCAAATCCAC  
TATTTTCGTAT-----ACA---CGAAAAAGGTATGATAGCAGAAGTGCAGGACTGATTCTCCAT-----  
AATAGGTTAGATCGCACCAATACC---AATTCCTTTTAT-----TCCAAGGCG---AAGATT-----  
-CAATCACTTAGCCAACAT-----CAAGAAGCT-----  
ATTGGTACCTTGTGAAATCGAAATAAAGAATACCAA-----  
TCTTTGATGGTTTTGTGCGGCATCCAACCTGTTCTCGAATTGGT-----TTTTTT-----AAGAATTCA---  
AAAAATCCC-----AATGGGGTAAAA--GAATCGAAT-----

CCTAGAATTCCTATTCCAAAATTTTGGGGGCTCTTTCGAAAATTTTTCGGGACTCTTAGGTAATTTGCACCTAGTATATC  
GAATTTT---TCT---TCATCT---TACTATTTACTAACGTATAATCAGATC---  
CTGTTAAAAAGCATTGTCTCCTTGACAAT-----TTGAAACAAAACCTTCAA-----GTAATTCAGGACTT--

AAACACTCTTTAATAAATGAAAATCAAAGGACTTCAAATTTTCGAT-----  
AGTAACATCATGTTGGATCCATTCCAGTTAAATTGGCACTTTCTCCCTCATGAT-----TCTTGGGAAGAG---ACATCAGCA-  
-----AAAATTCACCTTGGACAATTTATTTGCGAA-----AATGTATGTCTATTT-----AAA-----TCG-----  
CACATAAAAAAA---

TCAGGTCAAATTTTCATTGTAAATATAGATTCCTTTGTTATAAGAGCAGCTAAGCCTTATTTGGCCACTACAGGAGCAAC  
TGTTTCATGGTCATTATGGAGAAATCCTTTACAAAGGGGATAGGTTAGTTACGTTTATATACGAAAAGCGAGATCTAGTG  
ACATAACG---

CAAGGTCTTCCAAAAGTAGAACAAATCTTCGAAGCGCGTTCAATTGATTCACTATCGCCGAATCTCGAAAGGAGAATTGA  
GGATTGGAAT---

GAGCGTATACCAAGAATTTCTTGGGGGCTCTTGGGGATTCTTGATTGGAGCTGAGTTAACCATAGCCCAAAGTCGTATCTC  
TTTGGTTAATAAGATCCAAAAGGTTTATCGATCCCAAGGGGTACAGATCCATAATAGACATATAGAGATTATTATACGCC  
AAGTAACATCAAAGTGCAGGTTTCCGAAGATGGAATGTCTAATGTTTTTTCACCTGGGGAATTAATTGGACTATTGCGA  
GCAGAGCGAGCAGGGCGGGCTTTGGATGAATCGATCTATTATCGGGCAATCTTATTGGGAATAACAAGGGTTTTCCCTGAA  
TACCCAAAGTTTCATATCTGAAGCAAGTTTTCAAGAAACTGCTCGAGTTTTAGCAAAGCTGCCTTACGAGGTCGTATTG  
ATTGGTTGAAAGGCCTGAAAGAAAACGTAGTTCTGGGGGGGATTATACCTGTTGGTACCGGATTCT---

CAAAAATTTGTGCACCGTTAC-----CCACAAAACAAGAACCTTTAT-----TTCGAA-----ATTCAA--  
-----AAAAAAAATA-----TTTGCCTCGGAAATGAGA---GATATTTTGTCTTCCATACA-----  
GAATTAGTTTCTTCTGATTCTGACGTAACAAAC-----AATTTCTATGAGACATCAGAATCACCA-----  
-----TTTACC-----CCATTTATA-----

ATGACAAGAAGATATTGGAACATCAATTTGAAAGAGATGATAGAAGCGGGAGTTCATTTTGGTCATGGTATTAAGAAATG  
GAATCCTAAAATGGCCCCTTACATCTCGGCA-----

AAGCGTAAAGGTACTCATATTACAAATCTCGCTAGAACCACCCGTTTTTTATCAGAAGCTTGTGATTTAGTTTTTGTATGC  
AGCAAGTCAGGGAAAAAGCTTCTTAATTGTTGGTACCAAAAAAGAGCAGCGGATTTAGTAGCATCAGCTGCAATAAGGG  
CTCGTTGTCAATTATGTTAATAAAAAGTGGTTCAGTGGTATGTTAACGAATTGGTCGATTACTAAAACAGACTTTCTCAA  
TTTAGAGACTTAAGAGCAGAAGAAAAGATGAAAAAATCCACCATCTCCAAAAAGAGATGTGGCAATCTTGAAGAGAAA  
ATTATCTACCTTGCAAAGATATCTCGGCGGGATCAAATATATGACGAGGTTGCCTGACATTGTGATCGTCTCGATCAGC  
AAAAAGAGTATATAGCTCTTCGGGAATGTGCCATTTTGGGGATTCTACTATTTCTTTAGCCGATACAAATTGTGACCCA  
GATCTCGCAATATATCGATTCCAGCCAACGATGACACTATGACTTCAATTCGATTGATTCTTAACAAATTAGTATTTGC  
AATTTGTGAGGGCCGTTCTCTCTAT-----ATAAGAAATCAT-----

-----ATGGGACAAAAATAAATCCACTTGGTTTTAGACTTGGT---

ACAACCCAAAATCACCATTCTTTTGGTTCGCACAACCAAAA---  
AATTATTCTGAAGGTCTACAGGAAGATAAAAAAATACGGAATTGTATCAAGAACTATATACAA---AAG-----  
AATAGGAAAAAGGGCTCGAATAGAAAAATAGAAGCAGACTCAAGTTTCGAAGTAATTACACATAATAAAAAAATGGACTC  
AGGCTCAAGTTCCGAAGTA-----  
ATTACACATATAGAAATTCAAAAGAAATCGATACAATCCACGTCATAATCCATATTGGATTCCCAAT-----

-----TTATTAAGAAAAAGGA-----GCAATC-----  
GAAGAATTAGAGAAAGATCTACAAAAAGAAGTT---  
AATTCTGTAAACCAGAGACTTAATATTGGGATCGAAAAAGTGAAAGAACCTTATAGACAACCTAACATTCTTGCAGAATA  
TATAGCTTTCCAATTAATAAATAGAGTTTTATTCCGAAAGGCAATGAAAAAGCCATTGAATTAATAAATAAATAACAGATA  
TAAAGGGA---GTAAAAGTAAAAATTGCAGGCCGTCTCGCGGGAAAA-----  
GAAATTGCGCGTGCAGTGCATCAAAAAAGGTAGACTTCCCCTCCAACAATTTCGCGCTAAAATTGATTATTGCTGCTA  
TCCAATTGCAACTATCTATGGAGTATTAGGAGTTAAAATTTGGATATTTCGTAGACGAAGAA---  
ATGTCCCCTTATCGAGGACCTCGTTTTAAAAAATACGCCGTCTGGGAGCTTTACCAGGACTCACTAGA-----  
AAAACACCT-----  
AAATCCGGAAGTAATCTGAAAAAGAAATTCATTCTGGG-----AAAAA---  
GAACAATATCGTATTCGTCTTCAAGAAAAACAGAAATTGCGTTTTTATTATGGTCTGACAGAACGACAATTACTTAGATA  
TGTACATATCGCTGAAAAAGCAAAAAGTTCAACAGGTCAGGTTTTACTACAATTACTT  
Panax

-----  
AAAAAGTATTTTGTGGTTCGACCTGTAGTCACATATGAAATAACGGACGGTATAAAT-----  
TTAGCAACACTTTTCTCCCGGATCTGTTGCAGGAAAGGATAATGTGCAACTTCGAGTTGTCAATTATATCCTTTATGG  
AACTGGCAAACCAATTCCGGGTTTTTATGAC-----  
ACAAGTATTCAATTAGTTAGGACTTGTTTAGTATTAATTTGGGTCCAAGAC-----AAAAAAGTTCTTCTATC-----  
-GAA---  
GAGGCCCGTACTTCTTTGTTGAAATAAGGATAAATAGTTTTGATTTCGAGATTTTCTAAAAATCGACTTAGCGAAATCCCC  
TATTTTGTAT-----ACC---GGAAAAAGGAAAGATCCATCGGGTTCAGGATTGATCTCTGAG-----  
AATGGATCAGATCGCACCAATATC---AATCCGTTTTCTCCAGTTTTTTCTAT---TCCAAGGCA---AGGATT---  
AAAGAATCCCTTAATCAAAAC-----CAAGGAAT-----  
ATTCATACATTGTTGAATAGAAATAAGGAATGCCAA-----  
TCTTTGATAATTTTGTATCATCCAATTGTTTTCGAATGGGT-----CCATTC-----AACGATGTA---  
AAATATCAC-----AATGTGATAAAA---GAATCAATT-----CAAAAA-----

-----GACCCCTAATTCAAATT-----AGGAATTCGTTGGGCCCTTTAGGAACG--  
-GCCCTTCAAATTCGAATTTT---TAT---TCATTT---TCCATTTAATAACTTACAATCAGATC---  
CTGGTAACTAACTATTTGCAACTTGACAAT-----TTAAAACAGAGTTTTCAA-----GTACTT-----

-----  
AAATATTATTTAATGGATGAAATGGGAAATTTATAATCCCGATCGATGCTGTAACATTATTTTGAATCCATTCAATTT  
GAATTGGTTTTTTCTCCATCACAAT-----  
-----TATTGTGAAGAG---ACGTCTACA-----  
ACAATGAGTCTTGGGCAGTTTTATTTGTGAA-----AATGTATGTATAGCC-----AAAAATGGACCA-----  
CACCTAAAA-----  
CCGGGTCAAGTTCTAATTGTTCAAGTTGACTCTGTAGTAATACGATCCGCTAAGCCTTATTTGGCCACCCCAGGAGCAAC  
TGTTTCATGGCCATTATGGGGAAATCCTTTACGAAGGAGATACATTAGTTACATTTATATATGAAAAATCGCGATCTGGTG  
ATATAACG---  
CAGGGTCTTCCAAAAGTCGAACAGGTGTTAGAAGTGCCTTCGATTGATTCAATATCGATGAATCTCGAAAAGAGGGTTGA  
GGGCTGGAAC---  
GAATGTATAACAAGAAATCTTGAATTCCTTGGGGATTCTTGATTGGGGCTGAGCTAACTATAGTGCAAAGTCGTATTTT  
TTTGGTTAATAAGATCCAAAAGGTTTATCGATCCCAGGGGTGCAGATCCATAATAGGCATATAGAAATTATTGTACGTC  
AAATAACATCAAAGTGTGGTTTTGAGAAGATGGGATGTCTAATGTTTTTTTACCCGGAGAATTTATTGGATTGTTGCGA  
GCGGAACGAATGGGTGCGCTTTGGAAGAAGCGATCTGTTACCAAGCCGCTTATTGGGAATAACAAAAGCATCTCTGAA  
TACTCAAAGTTTTCATATCCGAAGCGAGTTTTCAAGAAACTGCTCGAGTTTTAGCAAAGCAGCTCTCCGGGGTTCGTATCG  
ATTGGTTGAAAGGCCTGAAAGAGAAGCTTGTCTGGGGGAATGATACCCGTTGGTACCGGATTC---  
AAAGGATTGGTGCCCCCTTCG-----AGGCAACATAAGAATATTCC-----TTGGAA-----ACCAA--  
-----AATAAGAATCTA-----TTCGAGGGGGAAATGAGA---GATATTTTGTTCACCACAGA-----  
AAATTTTTT-----GATTCTTGCTTTCAAAG-----AATTTCCATGATACACCAGAACAATCA-----  
-----TTTATA-----GGATTTAATGATTCC-----

-----  
ATGACAAAAAGATATTGGAACATCAATTTGGAAGAGATGATGAAGGCCGGAGTTCATTTTGGACATGGTACTAAGAAATG  
GAATCCTAAAATGGCCCCTTATATCTCTGCA-----  
AAGCGTAAAGGTATTTCATATTACAAATCTTACTAGAACTGCTCGTTTTTTTATTAGAAGCTTGTGATTTGGTTTTTGGATGC  
AGCAAGTAGGGGAAAACAATTCTTAATCGTTGGCACTAAAAATAAAGCAGCTAACTTAGTAGCATGGGCTGCAATAAAGG  
CTCGGTGTCATTATGTTAATAAAAAATGGCTCGGGCGGTATGTTAACGAATTGGTCCACTACAGAAACAAGACTTCATAAG  
TTTAGAGACTTGAGAACAGAACAAAAACGGGGAGACTCAACCGTCTTCCGAAAAGAGATGCGGCTATGTTGAAAAGACA  
ATTATCCCCTTGCAAACATATCTGGGCGGGATTAAATATATGACAGGGTTACCAGATATTGTAATCATCGTTGATCAGC  
ACGAAGAATATACGGCCCTTCGAGAATGTATCACTTTGGGAATTCACAACAATTTGTTTAATCGATACAAATTGTGACCCC  
GATCTTGCAGATATTTGATTCCAGCGAACGACGATGCTATATCYTCAATCCGATTAATTCTTAACAAATTAGTATTTCGC  
AATTTGTGAGGGGCGTTCTAGCTAT-----ATAAGAAATCCG-----  
-----ATGGGACAAAAATAAATCCACTCGTTTTGACTTGGT---  
ACAACCCAAGGTCATCATTCCCTTTGGTTTGACAACCAAAA---  
AATTATTCCGAAGGTTTACAAGAAGATCAAAAAATAAGAGATTTTATCAAGAATTATGTACAA---AAA-----  
AATATGAAAATTTCTCT-----  
-----AGCGTTGAGGGA-----  
ATTGCACGTATAGAGATTCAAAAACGAATCGATCTGATCCAGGTCATAATCTATATGGGATTCCCAAAG-----  
-----TTATTAATAGAAAGTCGACCGCGA-----GGAATC-----  
GAAGAATTGCAGATGAATCTACAAAAAGAATTT---  
AAGTCTGTGAACCAAAAACCTTAACATTGCTATCACAAGAATTGCAAAACCTTACGGAAGCCCTAATATTCTTGCGGAATT  
TATAGCCGGCCAATTAAGAATAGAGTTTCATTTGAAAAGCAATGAAAAGGCTATTGAATTAACCGAACAAGCAGATA  
CAAAAGGA---ATTCAAGTACAAATTGCAGGGCGTATCGACGGAAAA-----  
GAAATTGCGCGTGTGGAATGGATCAGAGAAGGTAGGGTTCCCTGCAAACCATTTCGAGCTAAAATCGATTATTGTTCCCTA  
TACTGTTCGAACTATTTATGGAGTATTAGGCATCAAAATTTGGATATTTATAGACGGGGAA---  
ATGTGCGGTTACCGAGGACCTCGTTTCAAAAAATACGCCGCTGGGAGCTTTACCGGGACTAACTAAT-----  
AAAAGGCCT-----  
AGAGCCGGAAGTATCTTAGAAATCAATCGCGTTCCGGG-----AAAAA---  
TCTCAATATCGTATTCGTCTAGAAGAAAAACAAAAATTGCGTTTTTCATTATGGTCTTACAGAACGACAATTACTTAAATA  
CGTTCGTATCGCCGGAAAAGCCAAGGGGTCAACAGGTCAGGTTTTACTCCAATTACTY  
Pelargonium -----  
-----  
AAAAATTCTTTTTTTTACTTCAACCCGTAGTCACATATGAAATAGCGGACGGTATAAAT-----  
TTAGCAAGACTTTTTCTCCAGATCTATTGCAGGAAATAGATAATATACAACCTTCGAGTTGGCAATTATATTGTTATGG  
GGATGGCGAGTTGATTCCAGGCATTTCTGGCAAAAATCCAAGGATTCAATTAGTTCGGACTTTTTTAGTCTTGAATTGGG  
ACCAAGAC-----AAAAAGATTTCGTCTATC-----GAG---  
GAGGCTCACGCTTCTTTGTGGAAGTAAGTACAAAGGGCATGGTTCGAGATTTCTAAGAATTCACTTAAGGAAATCCCA  
GATTGCGTATGCGTATATG---AGAAAAGGAATGATCCGTGAGGGTCAGGATTTCCCTCTGAT-----  
AATGAGTTAGATCACAGCAATAGA---AATCCCTTTTCTTCCAGTTAT-----CCCAAGGCA---AGGGTT---  
CGACAATCACTTAAC-----GGAAT-----  
ATTTCGTACATTGTTGAATAGAAATAAGGAATGCCAA-----  
TCTTTACTCATTGTTGTCATCATCTAATTGTTTTGACTAGGT-----CCCTTC-----ACAATGTA---  
AAATATCAC-----AATCCGAAAAA---GAATCAATT-----AAAAGAGATACA--  
-----  
-----GACCCTCTCATTCCAATT-----AGGAATTTTTTCAGGCCCTTTAGGAACA--  
-GTCCCTCAAATTGCGAATTTT---GAT---GTATTT---TACCATTTAATCACAAAGAATCGGATT---  
TCGGTATTTTCAATTTTGCACCTGAAAAA-----GGGAAACTTCAA-----GTCATT-----  
-----  
CAATCTTTTTTAATGGATGAAAACGGGAGAATCTATAAGTCTGATCCATATAGTAACATCTTTTTGAATCCATTCAATTT  
CAATTGGTATTTTCTACAGCATAATTATCATAAGAATTATCCTAAT-----  
-----TATTGTGAAGAA---ACATCTACA-----  
ATAATCAATCTTGGGCAGTTTCTTTTTTGAA-----ACTGTATGTATAGCC-----AAAAACGGACCA-----  
CGCCTAAAA-----  
TCGGGTCAAGTTTTTCAATTCTTCAAGTTGGCTATGTAATAATAAGATCAGGTAAGCCCTATTTGGCTATTCCAGGAGCAAC  
CGTTCATGGCCATTCTGGACAAATCGTTTACGGGGGGGATACACTAGTTACATTTATATATGAAAAGACAGGCTCTGCTG  
ATATAACA---  
CAGGGTCTTCCAAAAGTAGACGCGATGTTTCGAAGTGCCTTCAAAGAATTCATATCCATGCGCCTAAAAGCGAGAGATGA

GTATTGGAAC---  
GAGTATATAACAAGAAATCTTGGAAATTTATTGGGGATTATTGATTGGTGCCAAGCTAACAATAGCGCAAAGCTCTCTTTC  
TTTGGTTAATGAGATTCAAAGGTTTATCGATCCCAGGGAGTCCAGATCGATAATAGGCATATAGAAGCTGATTGTACGCC  
AAATAACATCAAAAGTCTTGATTTTCAGAAGATGGGATGTCTAATCTTTTTTTACCCGGAGAAGCTTATTGGATTGTTACAA  
GCGGAACGGACGGGGCGTGCTTTGGAAAAGGGGATCTGTTACCGCGCCATCTTAGTGGGAATAACGAAAGCATCTCTGAA  
TACTCAAAGTTTCATATCCGAAGCGAGTTTTCAACAACTGCTCGGGTTTTAGCAAAGCCGCTCTCCGAGGTCGTATCG  
ATTGGTTAAAAGGCCTGAAAGAGAACGTTGTTCTAGGGGGGATGAGCCCCGCTGGGACCGGATTC---  
AGAGGATTAGTGCACCCCTCTTCA---AAAAAATAAAGACTCTTTCT-----CTGGAA-----ACTCAA--  
-----AGGAAGATTTTA-----TTCGACGGGAAAGTGAGG---GATCTTTTATTCCATCATAAA-----  
AGAATTGTT-----TGA-----

-----  
ATGACAAAAAGATCTTGGAAACATCCGGTTGGAAGACATGGTAGCAGCAAGAGTTCATCTTGGTCATGATATTAAGAAACG  
GAATCCTAGAATGGCGCCTTATATTTCTGCA-----  
AAGCTTAAAGATACTGATATTACAAATCTTAAGAAAACCGCGCGCTTTTTATCAGAACTTGTGATTTAGTTTTTGGGC  
AGCAAGTAAGGGAAAAAAATTTCTTAATTGTTGGTACCAAAAAAGAAGTAGCTAATTCAGTAGCACAGGCTGCAAGAACGG  
CTGGATGCCATTATGTTAATCAAAAATGGCTCGGCGGTATGTTAACAAATTGGTCCACTACAAAAAGAGACTTCATAAG  
TTCAGGGACTTGATAAGGCAACAA-----  
GGGAGACTCAACCGCCTTCCGAAAAGAGATGCAGCTATTTTGAAGAGACAATTGTTTCACTTGCAAAAATCTCTAGGCGG  
GGTGAATATATGAAGGAATTACCCGATATTGTAATCATCTTGATCAGCACGGCGAATTTACGGCCCTTCGAGAATGTA  
TTAGTTTGAGAATCCAACAATTGGTTAATCGATACAAATTGTGACCCCGATCTCGTGGATCTCCCGATTCCAGCAAT  
GATGACTCTATCCCTTCAATCCGATTCACTCTTAACAAATTAATACTCGCAATTTGTAAGGGTCGTTCTAGA-----

-----  
CGAACGATTACTAGTCGTCCATCGCACATAAAAAAGAAAGAAAAGAACAGATAAATGGGACAAAAAATCAATCCATTAGG  
TTTCCGACTTGGT---ACAACCCAAACCCATCACTCTATTTGGTTTGAAAAACGAAAA---  
GATTATTCTGAAGGCCTACAAGAAGATCACAAAATACGAGAACACATTGAGAATTATATAGAA---AAG-----  
GAGAGAATCTCCTCC-----  
----GATTCGGATGTC-----

ATTTACGAATACAGATTGACAAATCAATCGATGTGGTTAAAGTCATAATATATATGGGATTCTCACAG-----  
-----TTATTAACAGAGGATGAACCGCCAAAACCAAAATC-----  
AAAGAATTACAGGTAAGTTTAAAAAAGCCATTCACTTCATTCAAAACCGAAAAGCTGAATCTTGCTGTTAGAAAAATGAA  
AAAGCCTTACGGAGACCCTACTATTCTTGAAAATATATAGCCAACCAATTAAGAATAGAGTTTCATTTTCGCAAAGTAA  
TGAAAAAGGCTGTTGAATTAGTCGAAAAAGCATATAAAAAGGGA---  
ATTCAGTACAAATTGCCGGATGTATTGGCGGAAAAGCACAAGAAATGGCACGCGTCGAATGGCTTAGAAAGGGTCGAGT  
CCCTCTCAAACCGTTACCGCTAAAATAGATTTTTGTTCCACTCAAGTTATAACTATCCGTGGGGTATTGGGCATAAAAG  
TTTGGATCTTTTGA-----  
ATGTCGCGTTACCGAGGACCTCGTGTAATAAATAAAACGTCTGGGGTCTTTACCGGGACTAACTACT-----  
AAAAAGCCGCCT-----  
ATAGTCGTAAGGGATCCTCGAAAGTTATCGCGCCCCAAGCCCAAGAAAAA---  
TCTCAATATCGTATTCGTTTAGAAGAAAAACAAAATGCGTTTTTCATTATGGTCTTACAGAACGGCAATTACTGAAATA  
CGTTTCGATCGCCGAAAAGCCAAGGGCCGACGGGTCAAGTTTTACTACAATTACTT

Phalaenopsis

-----  
AAAAAGTATTTTGGTTTGGTTTCGGCCCGTAGTCACATATGAAATAGCTGATGGGATAAAT-----  
TTAGCAACACTTTTCTCTCAGGATCTCTTGACAGAAAAGAATAATGTCCAACCTCGAATTGTCATTATATACTTTATGA  
AAATGGCAAGTCAATTTCGAGGAATTTCTCAC-----  
ACAAGTATTCAATTAGTTTCGAGCTTGCTTAGTATTGACTTGGGACCAAGAA-----AAAAAGAGT---TCTATAGAA--  
-GAA---  
AAGGTTTCATGCTTCTTTTGGTTGAAATAAGGACAAATGATCTGCTTTGTTATTTTCATCCGAATTGAGTTAGTAAAGTCCAC  
TCTTTTCGTAT-----ACC---GAAAAAGGTATGATACGGCAGGTTTCAGGATTGATTTCCAAT-----  
AATGAATTAGATCGTATTTCATAGAAAAAATCCTTTTGTAT-----TCCAAGGCG---AAGATT-----  
-CAAAATTTCCCAACAT-----CAGGGAAT-----

```

CTTGGTACGTTGTTGAATCGAAATAAGGAATGCCAA-----
TCTTTCCCTAATTTTGTTCATCATCCAATTGTTCTCGAATTGGT-----CCCTTC-----AATACTTCG---
AGATATAAT-----AATGCGACAAAA---GAATTGGAT-----
-----
-----CCCATGACTCCAATT-----
AGGTATTTGTTGGGTCTTTAGGTACTATTGTGCCTAGAATAGTAAATTCT---CGT---TCATCT---
TACTATTTAAGAACTTATAATCAAGTC---TTTTTAAAGAAATCTTTTTTGCTTGAAAAT-----
TTTCAACAGACTTTCCAA-----GTGCTTCAAGTACCTCCATT-----
-----
CAATACTGTTTTCTAGATGAAAATAGTAGGATTTATAATCCCGATCCTTGCAGTAACATCATTGGAAATTCATTTTCATT
GAATTGGTGTTTTCTCCATCACGAT-----TCTTGTGAAGAG---GCATGGCCA-----
ATAATTAGCCTTGACAATTCCTTTGTGAA-----AATGTATATCTATTG-----AAATATGGATCA-----
CGCATAAAAAA---
TCTGGTCAAATTTTCATTGTTTCATGTTGATTCTCTAGTTATAAGATCAGCTAAGCCCTATTTGGTCACTCCAGGAGCAAC
TGTCCATGGTCATTATGGGGAAACCTTTTATGAAGGAGATACATTAATTACATTTATATATGAAAAGTCGAGATCTGGTG
ACATAACG---
CAAGGTCTTCCAAAAGTAGAACAAATCTTAGAAGTTCGTTCAATTGATTCAATATCGATGAACCTCGAAAGAAGAGTTGA
AGGTTGGGAC---
GAACGTATCCGAAGGATTCTTGGGATCCCCTGGGGATTCTTGATTGGAGCTGAACTAACCATAGCCCAAAGTCGTATCTC
TTTGGTTAATAAGATACAAAAGGTTTATCGATCCCAGGGGGTACAGATCCATAATAGACATCTAGAGATTATTGTACGTC
AAGTAACATCAAGAGTTTTGGTTTTCCGAAGATGGAATGTCTAATGTTTTTTTACCTGGGGGAATTTATTGGATTGTTGCGA
GCAGAACGAGCAGGGCGCGTTTTGGCCGAATCAATCTGTTATCGGGCAATCTTATTGGGAATAACGAAGTCATCTCTGAA
TACTCAAAGTTTCATATCCGAAGCAAGTTTTCAAGAACTGCTCGAGTTTTAGCAAAGCTGCTCTACGAGGTTCGTATTG
ATTGGTTGAAAGGCCTGAAAGAAAACGTTGTTCTGGGGGGAAATTATACCGGTTGGTACCGGATT---
AATAAATTTAGTACATCGTTCA-----AAGCAAGACAAAAACATTCAT-----TTGAAA-----ATCAAA--
-----AGGAAAAATCTA-----TTCGAGTTGGAAATGAGC---GATATTTTGCTACACCATAGA-----
GAATTATTT---TGTTCTTGTGCC---CAA-----GAACTTTCCATGAGACATCAGACCAAT-----
-----CTTTTA-----CGTAATGTATCC-----
-----
-----
ATGGGAAGACGATATTGGAACATCAATTTGGAAGAAATGATGGAAGCAGGAATTCATTTTGGTCATGTTACTAATAAATG
GAATCCTAGAATGGCTCCTTACATCTCGTCA-----
AAGCGTAAAGGTATTCATATTACAAATCTTACTATAACTGCTCGTTTTTTATCAGAAGCCTGCGATTTAGTTTTTGTATGC
AGCAAGTAGGGGAAAAAGATTCTTAATCGTTGGCACCACAAAAGAAAGCAGCGGATTTAGTAGCATCAGCAGCAATAAAGG
CTCGATGTCATTATGTTAATAAAAAATGGCTTGGTGGTATGTTAACGAATTGGTCTACTACAGAAACAAGACTTCAGAAG
TTCAGGGACTTAAGAGCAGAACAAAAGATGGGGAACTCAATCGTCTCCCTAAAGGAGATGCAGCAATGTTGAAGAGAAA
GTTATCTACTTTGCAAGCATATCTTGGCGGGATCAATATATGACGGGATTGCCCGATATTGTAATTATCGTGGATCAGC
AAGAAGAATATACGGTCTTTCGAGAATGTGTCAATTTGGGTATTCCGACGATTTGTTTAATCGATACAAATTTGTGATCCA
GATCTTGAGATATTTCTATTCCGGCCAACGATGATGTATCGCTTCGATTTCGATTGATTCTTACCAAATAGTATCTGC
AATTTGTGAGGGTCACTTAGTTAT-----ATAAAAAAAGGT-----
-----ATGGGACAAAAAATAATCCACTTGGTTTTCAGACTTGA---
ACAACCTCAAAGTCATCACTTTTGGTTCGCAAAACCAAAA---
AATTTTTCCATAGGTCTACAAGAAGATGAAAGAATACGGAATTGTATTAAGGACTATGTAAAA---AAA-----
AATAAGAAAATATCCTCA-----
-----GGTTTCGAAGGA-----
ATTGCTTATATAGGAATTCAAAAAGAATAGATTTTATTCAAGTCATAATCTATATTGGATTTCCCAAT-----
-----TTATTAATAGAAGGACGAACACGG-----GGAGTC-----
GAAGAATTACAGATGAATGTACAAAAAGAGTTT---
CATTCTGTAAACCGGAGACTCAACATTGCTATCACAAGAATTGAAAAACCTTACGGACAACCTAATATTCTCGCAGAATA
TATAGCTTTACAATTAAAAAATAGAGTCTCATTTCGAAAGGCAATGAAAAAGCTATTGAATTAACCTGAACAAACCGGTA
CAAAAGGA---ATTCAAGTGCAAATTGCAGGACGTATCGACGGAAA-----

```



GAGATTGCACGTGTCGAATGGATCAGAGAAGGCAGGGTCCCTACAAACAATTCGCGCTAAAATTGATCACTGTTCCCA  
TACAGTTAGAACTATCTATGGAATCTTAGGTATCAAATTTGGATATTTGTAAACCAAGAA---  
ATGTCTCGTTACCGAGGACCTCGTTTCAAAAAAATACGCCGGCTGGGGGTTTTACCAGGACTAACTAGT-----  
AAAAGACCC-----  
AGATCCAGAAGTGATCTTCAAACCCAATTGCGCTTTGGA-----AAAAGA---  
TCACAATATCGTATTCGTTTGAAGAGAAACAGAAATTGCGTTTTTCATTATGGTCTGACAGAACGACAATTACTTAAATA  
TGTGCATATTGCTGGAAAAGCCAAAGGGTCAACAGGCCAGGTTTTACTACAATACTC

Pinus -----

-----GTAGAACATGGAATACCTGATGGGTGCAAT-----  
ATGACAACACCGTTTTTCCCTAGATTTATCGAGGGAAGGGGACAACCTTGCAGATTCAAATTAGCTATTCTATTTGCTATGA  
AGACGGTGAACGAATCCAAGTAATGAGTGAT-----  
ATAAGTATTCATTGGTTTCAACTTGATAGGATTTGATTGGGAACAA-----ATAGAT---TCTATA-----  
-

GAATCTGAGGCTTATGTTTCTCTTATTTTTCAGTAAGAACAATAAGATCGTTAACAATATGGTTCAAATTAGCTTGATGAA  
ATACCCCCCTTTTTTC-----ATG---GGGAGAAGGGACAATAAAACAAGTCCAAATTTGATGTTCCAT-----  
ACAATTTGGACCAC-----ACT---AATCTTTTTATCT-----TCCAATGGG---GCGAGT-----  
-CAATTAATTAGTAAGCAT-----CAAGGAATT-----  
ATTTGTTTATTATCTAATGGGGAAGAAGACAGTGGA-----  
TCTTTTATGGTTCTATCACCATCCGACTATTTTTCGAATCGTT-----CTATTC-----AATGATTCT---  
AAATGTTAT-----GATACGGGAAAT---CAATCAAAT-----AGAAAG-----

-----GATCCTATGAGAAAAATC-----ATTGAATTTTCAGGTCTCTTGGGTAAT---  
-TTACATAGTATAACCAACCGT---TTT---CCATCC---TCCCATTTTCTAACTTATAAAAAAGTA---  
TTATCAAAGAAACATTCCATTTTCCACAAT-----TCTTTCAATACTTTCCAA-----GTACCT-----

AAATATTATTTTCATGGACGAAAAATATGATAATTTATCATTTCGATCCGTCAGGAACATCATTCCAATCTATTGGGTCC  
AAATTGGTGCTCTTCCCTCATCCGAATCCGAA-----

-----TTCTGCGAAAAA---ACATTTCCA-----  
GTAGTTAGTCTTGGACAATTGATTCTGAA-----AGTGTATGGATATCC-----GAGGATGAACCA-----  
CTCCCCGAA-----

TCTGGTCAAATTATAGCAGTTGATGAGGAATCTTTAGTCATTAGATCAGCTAAACCTTATTTGGCTACTCGAAAAGCAAC  
TGTCCATAGTCATTATGGAAAAATTCTTGACAAAAGGAGATACATTGATAACATTGATATATGAAAGGTTCAAATCCAGTG  
ATATAATT---  
CAAGGTCTTCTAAAGTTGAACAATTGTCAGAAGCCCGTTTTGAATAATTCATATCGATGAATCTGAAAGAAAGTTTTGA  
AAATTGGACC---

GGAGATATGACAAGATTTCTTGGGAAGTCTTTGGGGGTTATTTCATAAGCGCTAGGATAACTATGGAACAAAGTCAGATTCA  
TTTGGTCAATCAGATTCAAAAGTTTACCGATCCCAAGGGGTACGAATTGGTGATAAGCATATAGAGGTTATTGTACGCC  
AAATGACATCGAAAGTCTTAATTTTCAAGAAGATGGAACGGCTAATGTTTTTTACCGGGGGAACTCATTGTATTATCACGA  
GCACAGAGAATGGATCGTGCTCTGGAAGAGGCAATCTACTATCAAACCATGTTATTAGGAATAACAAGGGCATCTCTGAA  
TACTCAAAGTTTTATATCCGAAGCGAGTTTCCAAGAACTGCTCGGGTCTTAGCTAAAGCTGCTCTACAAGGTTCGCATCG  
ATTGGTTGAAAGGCTTGAAGGAAAATGTTATTCTCGGGGGGATGATACCTGCCGGTACTGGG-----

CAACATATTCACCGTTCA-----GGGAAACGAAACGGAATAGAT-----CCAAGA-----ATAGGG-----  
-----AATAGGAATCTA-----TTTAGCAACAAAGTGAAG---GACATTTTATTTTCATCATGAC-----  
AAAGTAGAT-----TTTTTTTCTTTCAAGAC-----AATTCTTACAAATATCACAATATATTA-----  
-----AAA-----

-----  
-----  
-----  
-----  
-----  
-----  
-----  
-----  
ATGAGCAGAAGATATTGGAACATTGATTTGGAAGAGATGATGGAAGCAAGAGTTCATTTAGGGCATAAAACTAGGAAATG  
GAACCCTAAGATGGCACCTTACATTTTTTACA-----  
GAGCGTAAAGATACTCATATTATAAATCTGGCTAAAACCTGCTCGTTCTTTATCAGAAGCTTGTGATTTGCTGTTTGATAT  
AGCAGGTAGAGGAAAACAATTCCTGATAGTCCGTACGAAATATCAAGCAACTGATTTAGTAGCATCAGCTGCTACAGAAG

CTCGATGTCATTATGTAAATAGAAAATGGCTTGGTGGTATGTTAACTAATTGGTCTACTACAGAGACGAGACTTCAGAAG  
TTCAAGGATTTAAAAAAGAACAAGATACGGGACGATTCAATCAACTTCCAAAAAAGAAGCAGCTATGCTCAAGAGACA  
ATTAGACCAATTGCAGAAATATCTAGGTGGGATTAGATATATGACAAGCTTACCCGATATTGCTATAATTACCAATCAAC  
GAGAAGAATCCATTGCTCTTGGGGAATGTAGAACTTTGGGTATTCCGACAATTTGCTTGGTTGATACAGATTGTGATCCA  
GATCTCGTGGATATCCCAATTCCAGCCAATGATGATGGTATAGCTTCAATCCAATTGATCCTGAACAGATTAACGTCAGC  
AATTTGCGAAGGAAGGGCA-----TTAAGGTCATTA-----  
-----ATGGCGCAGAAAATAAATCCACTTGGTTTTAGACTTGGT---  
GTA ACTCAAAATGAGCGTTCCTTCCATTGGTTCGCACAACAAAG---  
AATTATTCCAAAGATCTCCGAGAAGATCAAAAAATACGTACTTGCATTGAAAACCTATGTACGA---ACG-----  
CATATAAAGAGCTCCTCG-----  
-----AATTATGGAGGA-----  
ATTGCACGTGTAGAGATTCGCAGAAAGATCGATTTGATTAAGGTCAAAATCTATATTGGATTTCCCAAC-----  
-----TTGTTGTTAATAGAAGGTAGGGGTCAA-----GGAATT-----  
GAAAAATTAAGAAACGATGTAATAAATATGCTC---  
GATTCTGTGGACCGAAAACCTTCACATTGCTATAGAAAAAGTTGCGAAAACCTATAGAAAACCTAATATTCTTGCAGAGTA  
TATTGCCCTACAACCTAGAGAAGAGAGTTCCATTTCAGAAAAACAATGAAGAAAGCTATTGAACTGGCTGAACGGGAAGAGG  
TAGAAGGT---ATTCAGATCCAAATTGCAGGACGTCTCGATGGAAAG-----  
GAAATTGCCCGGGTGAATGGGACAGGGGAGGTAGGGTTCCTTACAGACAATTCCGGGCTAGGATTGATTATTGTTATTA  
TCCGGTTAAAACCATCTATGGAGTTTTAGGGATAAAAAATTTGGATTTTAGAAGAG-----  
ATGTCCCGTTATCGGGGACCTCGTTTAAAAATAATACGTCGCTGAAAACCTTTACCAGGTCTCACTAGT-----  
AAAAGACCC-----  
AAAAACAGAAAGGATTCTATGAACCGGTCTTCTTCCAGG-----AAAATA---  
TCTCAATATCGTATCCGGCTAGAAGAAAAACAGAAATTGCGTTTTTCATTACGGACTAACAGAGCGACAATTGCTGAAATA  
TGTTTCGTATTGCTAGAAGAGCCAAAGGCTCAAGG-GTCAGGTC-TATTGCAATTACT-  
Piper -----  
-----  
AAAAAGTATTTTGTTCGGTTCGACCCGTAGTTACATACGAAATAGCAGATGGCATAAAC-----  
TTAGCAACACTTTTTCCCCAGGATTCGTTGCAAGAACGGGATAACGTACAACCTCCGAGTCGTCAATTATATTCTTTACGG  
AAATGGCAAACCCATTTCGAGGAATTTCTCAC-----  
ACAAGTATTCGAATTAGTTTGAATTTAGTATTGAATTGGGATCAAGACAACAAAAAACAAGT---TCTATA-----  
-GAA---  
GAAGTTTTTGTCTCCTTTGTTGAAGTAAGGGCAAATGATCTGATTGAGATTTTATAAGAGTTGATTTAGTGAAGCCCCG  
TGTTTTGAAT-----ACT---GGAAAAAGAAATGATACGGCAGGCTACGGGTTGAATCCTGAT-----  
AATGGATCAGATTGCCCAATAGA---AATCCTTTTTAT-----TCCAAGATT---AAGATT-----  
-CAATCTTTTACTCAAGAT-----AACGGGACT-----  
ATTCATACGTCGTTGAATATTAATAAGCAATTACCG-----  
CCCTTTCTCATTGTCATCATCGAATTGTTTTCAAGCTGGT-----CCCCTCAAAGTCAATGGTTCG---  
AAATCTGAC-----AATGAAAAAAA---AAATCAATT-----AAGGAA-----  
-----  
-----GATCCCGCTATTTGATT-----AGGAATTTCTTCGGGCCCTTAGGGACT--  
-ATAGCTAAAATTACGAATTTG---GAT---TCACGA---AACTATTATCTGACTGATAATCAGATC---  
TTATTAAGAAATATTTAATACTTGACAAT-----TTTAAAAACCTTTTCCAA-----GACGTTCTC-----  
-----  
TATTATTTAATAGATGAAAAGGGTAGAATTTTGAATCCCGATCCATGTAGTAACATAATTTTAAATGCATTGATTGAA  
TTGGTGTCTTACATCACAAT-----  
-----TCTTGTGAGAAG---ACATTCTCA-----  
ATAATTAGTCTTGACAGCTTTTTTATGAA-----AATGGATCGATATAC-----AAATATAGATCA-----  
CACATCAA-----  
TCGGGACAAATTGTAACCGTTCATGGTGACTCCTTAGTAATCAGATCGGCCAAGCTTCATTTGGCCACTCCAGGAGCAAC  
TGTTTCATGGCCATTATGGGGAAATCATTACGAAGGAGATACATTAGTTACATTTATATACGAAAAATCGCGATCGGGTG  
ATATAACG---  
CAAGGTCTTCCAAAAGTAGAACAGGTGTTAGAAGTTCGTTTCGATTGATTCAATATCGATGAATTTAGAAAAGAGGGTTGA  
GGGTTGGAAT---  
GAAAATATAACCAAATTTCTTGAATTCCTTGGGGATTTTAAATTGGCGCTGAGTTAACCATAGTGCAAAGTCGTATCTC  
TTTGGTTAATAAGATTCAAAGGTTTATCGATCCCAGGGGTGCAGATCCATAATAGGCATATAGAGATTATTGTACGCC  
AAATAACATCAAAGTTTTGGTTTTCAGAAGATGGAATGTCAAATGCTTTTTTACCCGGAGAATAATCGGGTTGCTGCGA

GCAGAGCGGACAGGACGCGCTTTGGAGGAAACGATCTGTTACCGAGCAATCTTATTGGGATTAACGAGGGCATCTTTGAA  
TACTCAAAGTTTCATATCCGAAGCGAGTTTTCAAGAAACCGCCGAGTTTTAGCAAAGCTGCGCTGCGGGGTCGTATTG  
ATTGGTTGAAAGGCCTGAAAGAAAATGTTGTTCTGGGTGGGATGATACCCGTTGGTACCGGATTT---  
AAAGGATTTGTCCGCCGCTCA-----AGGCAACACAACAACATTTCT-----TTGGAA-----AAAAAA--  
-----AGGAATAATTTG-----GTTAAGGGGGAGATAGGC---AATATTTTGTTCACCACAGA-----  
GAGCTTTTT-----AGTTCCTTGCATATCCAAA-----AATAAAAAGAAATTTTCA-----  
-----  
-----  
-----  
-----  
-----  
-----

ATGACAAAAAGATATTGGAACATCAATTTAGAAGAGATGATGGAAGCGGGAGTTTCATTTCCGGTCATGGTACTAGGAAATG  
GAATCCTAGAATGGCACCTTACATCTCTGCA-----  
AAGCGTAAAGGTATTCATATTACAAATCTTACTAGAACTGCTCGTTTTTTATCAGAAACCTGTGATTTAGTTTTTGGACGC  
AGCAAGTAGGGGAAAGCACTTTTTAATAGTTGGTACAAAAAGTAAGGCTGCGGATTTAGTAGCATTAGCTGCAATAAGGG  
CTCGCTGCCATTATGTTAATAAAAAATGGCTCGGTGGTATGTTAACGAATTGGTCCACTACAGAAACGAGACTTCATAAG  
TTCAGGGATTTGAGAGCGGAACAAAGGGCGGGGAAACTCAACTGTCTGCCGAAAAGAGATGCTGCAATGTTGAAGAGAAA  
ATTATCTCATTGCAAACATATCTGGGTGGAATCAAGTATATGACGGGGTTGCCTGATATTGTAATAATCGTTGATCAGC  
ATGAAGAATATACGGCTCTTAGGGAATGTATCACTTTAGGGATTCCGACGATTTGTTTAATTGATACAAATTGTGATCCA  
GATCTGTGAGATATTTCCGATTCCAGCTAATGACGACGCTATCGCTTCAATCCGATTGATTCTTAACAAATTAGTATCTGC  
ACTTTGTGAGGGCCATTCTAGCTAT-----ATAAGAAACCGT-----  
-----ATGGGGAAAAAATAAATCCACTTGGTTTTCCGACTTGGT---  
GCAATCAAAGTCATCGTTCCATTTGGTTTTGCACAATCCAAA---  
AGTTATTCTAGAGGTCTTCAGGAAGATGAAAAAATACGAGATTGTATCCAACATTATGTAGAA---AAA-----  
AATACGAGAATATCCTCG-----  
-----

GGTTTTCGAAGGAAAAGGAATCTCCCATATAGAAATTCAAAAAAAATCGATCTTATCCAGGTAATAATCTATATGGGATC  
CCCAAAT-----TCGTTAATGGAGGGTCAACACGA-----GGAATC-----  
GACGAATTACAGACCAATGTACAAAAAGAATTT---  
CTTTCCGTGAACAGGAGACTTAAACATTGCTATTATACGAGTTGCAAAACCTTATGCACAACCCACTATTCTTGCAGAACA  
TATAGCTCTGCAATTAAGAATCGAGTTTCATTTGAAAGGCAATGAAAAGTGCTATTGAATTAAGTGAACAAGCAGATA  
CAAAGGA---ATTCAAATACAAATAGCAGGGCGTATCGATGGAAAA-----  
GAGATTGCACGTGTGCAATGGATCAGAGAAGGAAGGGTTCCCTACAAACCATTCCGAGCTAAAATTGATTATTGTTTCTTA  
CACAGTTGCAACTATTTATGGGATATTAGGCATTAATAATTTGGATATTTTTGGATGAGAAA---  
ATGTCTCGTTACCGAGGGCCTCGTTTTCAAAAAAATACGACGTTTGGGGGCTTTACCGGGACTCACTAGT-----  
AAAAGACCT-----  
AGATCTGAAAGTAGTCTTAGAAGTCAACCGGTTCTGGG-----AAAAGA---  
TCTCAATATCGTATTCGTTTGAAGAAAAACAAAAATTGCGCTTTTATTATGGGCTAACAGAGCGACAATTAATTAGATA  
TGTTTCGTATCGCCGAAAAGCCAAAGGATCAACGGGTGAGGTTTTACTACAACACTACT  
Platanus -----  
-----

AAAAAGTATTTTGTGTTTTGTTTCGACCCGTAGTCACATATGAAATAGCAGACGGGATCAAT-----  
TTAGCAACGCTTTTCCCCAAGATCTGTTGCAGGAAAGGGATAATGTACAACCTTCGAGTTGTCAATTATATCCTTTATGC  
AAATGGCAAACCAATTTCGAGGAATTTCTCAC-----  
ACAACATTTCAATTAGTTCCGACTTGTTTTAGTATTGAATTGGGACCAAGGC-----AAAAATGGCTCTTCCATA-----  
-AAA---  
GAGGTTTCATGCTTCCTTTTGTTGAAGTAAGGGCAATGATCTGATTCAAGATTTTATAAGAATGGACTTAGTGAAGTCCAC  
TATTTTCGCAT-----ACC---GGAAAAAGGAATGATCCGGCAGGTTTCAGGATTGATCCCCGAT-----  
AATGGATCAGATCGCACCAATATA---AATCCTTTTTAT-----TCCAAGGCA---AGGATT---  
CAACAATCACTTAGCCGACAC-----CAAGGAACT-----  
CTTCGTTTATTGTTGAATAGAAATAAGGAATGCCAA-----  
TCTTTGATAATTTTGTTCATCATCAAATTGTTCTCAAATGGGT-----CCTACTC-----AACACTTTG---  
AAATATCAC-----AATGTGACAAAA---GAATCAATT-----AAAAGA-----  
-----  
-----



TCTCAATATCGTATTCGTCTAGAAGAAAAACAAAAATTGCGTTTTTCATTATGGTCTGACAGAGCGGCAATTACTTAAATA  
CGTTTCGTATCGCCGAAAAGCCAAAGGGTCAACAGGTCAGGTTTTACTACAATTACTT

Populus

-----  
AAAAAGTCTTTTGTGGTTCGACCAGTACTCATATATGAAAGAGGGGACGGTATAAAT-----  
TTAGAAAGACTTTTTCCGCCGGATTTATTGCAGGAAAAAGAGAATCTGAAACTTCGAATTGTCAATTATATTCTTTATGG  
AAATGGTAAACCAATTCAGGGAATTTCTAAC-----

ACAAGTATTCAATTAGTTCGTACTTGTGTTAGTGTGAATTGGAACCAAGAC-----AAAAAAGTTCTTCTATC-----  
-GAA---

GAGGCTCGTGTGTTATTTGTTGAAGTAAGTATAAATGGTCTGATTTCGTGATTTCTAAGAATCCACTTAGGGAAATCAGC  
CATTTCCTAT-----ATCAGCAGAAAAAGGAACGATCCATCAGGTTTGGGATTGATCTCTGAT-----

AATGGGCCAGATCGCACCAATATT---AATCCGTTTTATTCCATTTAT-----TCCAAGACA---AGGATT---  
CCACAATCACTTAAACAAAAT-----

CAAGGAACTATTAGTATTAGTACGTTGTTGAATAGAAATATGGAATGTCAA-----  
TCTTTGATAATTTGTCATCATCTAATTGTTTTCGAATGGAT-----CCATCC-----AACGGTGTA---

AAATCTTAT-----AATGTAATAAAA---GAATCAACT-----AAAAGA-----  
-----

-----GATCCTATAATTCCAATT-----AGGAATTTGTTGGGCCCTTTAGGAACA--

-GCCCTTCAAATTCGAATTTT---TAT---TCATTT---TACCATTTACTAACTCATAATCAGATC---

TCGGTAATTAATATTTGAAACTTGACAATTTAAAATTTAAACAGACTTCAAAA-----GTACTA-----  
-----

AAATATTATTTAATGGATGAGAACGGTAGAATTGTTAATCACGATCCGTACAGTAACAACGTTTTGAATCCATTCAAATT  
GAATTGGTATTTTCTCCATCATAATTATCATCATAAT-----

-----TATTGTGAAGAA---ACATTCACA-----

ATAATTAACCTGGGACAGTTTATTTGTGAA-----AATGTATGTATGACA-----AAAAACGGACCA-----  
CGCCTAAAA-----

TCAGGTCAAGTTCTAATTGTTTCACGCCGACTCTGTAATACTAAGATTGGCTAAGCCCTATTTGGCCACTCCAGGAGCAAC  
TGTTTCATGGCCATTATGGGGAAATCCTTTATGAAGGAGATACATTAGTTACATTTATATATGAAAAATCGAGATCTGGTG  
ATATAACG---

CAGGGTCTTCCAAAAGTGGAACAGGTGTTAGAAGTGCGCTCAATTGATTCAATATCGATAAACCTAGAAAAGAGAGTGA  
GAATTGGAAC---

GAGTGATAACAAGAATTGTTGGAATTCCTTGGGGATTCTTGATTGGTGCTGAGCTAACTATAGTGCAAAGTCGTATTTCT  
CTTGGTTAATAAGATCCAAAAGGTTTATCGATCCCAGGGGTACAGATCCATAATAGGCATATAGAAATTATTGTACGCC

AAATAACATCAAAGTCTGGTTTTCAGAAGATGGAATGTCTAATGTTTTTCCACCGGAGAATAATTGGATTGTTGCGG  
GCGGAACGAGCGATGCGCGCTTTGGAAGAAGCGATCTGTTACCGAACCCTATTCTTGGGAATAACGAGAGCATCTCTGAG

TACTCAAAGTTTCATATCCGAAGCGAGTTTTCAAGAACTGCTCGCGTTTTAGCAAAGCTGCTCTCCGCGGTCTGATCG  
ATTGGCTGAAAGGCCTGAAAGAAAACGTCGTTCTAGGTGGTATGATACCCGTTGGTACCGGATTC---

AAAGGATTAGCGCACCGCTCA-----AGCCAACATAAGATCATTCT-----TTCAA-----ACCAA--  
-----AAGAAGAATTTA-----TTCGAGGGGGAAATGAGA---GATATTTTGTTCACCACAGA-----

GAGTTATTT-----GATTCCTTGCAATTTCAA-----AATTTCTATAATATATCAGAACAATCA-----  
-----TTTATA-----GGATTTAACGATTCC-----  
-----  
-----

ATGATAAGAAGATATTGGAACATTAATTTGAAAGAGATGTTGGAAACAGGAGTTCAATTTGGTTCATGCTACTAGAAAATG  
GAATCCGAAAATGGCACCTTATATCTCTGCA-----

AAGCGTAAGGGTATTCATATTACAAATCTTACTAGAACTGCTCGTTTTTTATCAGAAGCGTGTGATTTGGTTTTTGTATGC  
AGCAAGTAGGAGAAAACAATTCTTAATTGTTGGTACCAAAAATAAAGCAGCTGATCCAGTAGCGCGGGCTGCAATAAGAG

CTCGGTGTCATTATGTTAATAAAAAATGGCTAGGCGGCCTTTTAAACGAATTGGTCCACTACAGAAATGAGACTTCAAAG  
TTCAGGGACTTGAGAATGGAACAAAAGACAGGGGGAATCCACCGCCTTCCGAAAGGGGATGCGGCTCGATTAAAGAGACA

GTTATTTCACTTGCAAACATATTTGGGCGGGATTAATATATGACAGGGTTACCCGATATTGTAATAATCGTTGATCAGC  
AAGAAGAATATATGGCTCTTCAAGAATGTATCACTTTGGGAATTTCAAACAATTTGTTTAATTGATACAAACTGTGACCCG

GATCTCACAGATATTTGATTCCAGCGAATGATGACGCTATAGCTTCAATCCGATTAATTTTAAACAAATTAGTATTTGC  
-----

GATTTGTGAAGGGCGTTCTAGCTAT-----ATACGAAATCCC-----  
-----ATGGGACAAAAATAAATCCACTTGGTTTTAGACTTGGT---  
ACAACCCAAGATCATTATTCTCTTTGGTTTTGCACAACCAAAA---  
AATTTTTTTGAGGGTCTGCAAGAAGATCAAAAAATAAGAAATTGTATCAAAAATTATGTACAA---AAA-----  
AATATGAAAATTTCTTCT-----  
-----GGTGTGAAGGA-----  
ATTGGACATATAGAGATTCAAAAACGAATCGATGTGATTCAAGTTATAATCTACTTAGGATTCCCAAAA-----  
-----TTTTAACAGAAGGTAAACCTAAA-----AGGATC-----  
AAAGAATTACAGATAAATGTACAAAAAGAACTT---  
AATTGTATGAACCGAAAACCAACATTTCTATTACAAGAATTGAAAACCCCTTACATGCACCCGAATGTTCTTGCAGAATT  
TATAGCCGGACAATTAAGAATCGAGTTTCATTTTCGCAAAGCAATGAAAAGGCTATTGAATTAAGTACTGAGCAGAGCAATA  
CAAAAGGA---ATTCAGTACAAATTGCAGGGCGTCTTGATGGAAAA-----  
GAAATTGCACGCGCCGAATGGGTTAGAGAGGGCAGGGTTCCTCTACAAACTCTTCGAGCTAAAATTAATTATTGTTCTTA  
TACAGTTAGAACTATTTATGGGGTCTTAGGTATAAAAAATTTGGATATTTGTAGACGAGGAA---  
ATGTCACGTTACCGAGGGCCTCGTTTTCAAAAAATACGCCGTCTGGGGGCTTTACCGGGACTAACTAGT-----  
AAAAGGCCT-----  
AGAGCCGGGAGCGATCTTAGAAATCAATCGCGCGCCGGT-----AAAAA---  
TCTCAATATCGTATTCGTTTTAGAAGAAAAACAAAAATTCGTTTTTATTATGGTCTTACAGAACGACAATTGCTTAAATA  
CGTTCGTATCGCCGAAAAGCCAAAGGGTCAACAGGTCAGGTTTTACTACAATTACTT  
Ranunculus -----  
-----  
AAAAAGTATTTTGTGGTTTCGGCCCGTTGTCACATATGAAAGGGCGGACGGGATAAAT-----  
TTAGCAGCGCTTTTCCCAAGATCCTTTGCAGGAAAGGGATAATGTGCAACTTCGAGTTGTCAATTATATTCTTTATGG  
AAATGGAAAACCAATTTCGAGAATTTCTCAC-----  
ACAAATATTCAATTAGTTTGAAGTATTGATTGGGACCAAGAC-----AAAAAGGTTCTTCTATA-----  
-GAG---  
GAGGTTTCGTGCGTCTTTGTTGAGATAAAGATAAATGCTCTGATTTCGAGATTTCAAAAAATGGACTTAGTGAAGTACCC  
TATTTTCGTAT-----ACC---AGAAAAAGAAATGATCCGGTAGGGTCAGGATTGATCCCCGTT-----  
AATGGATCAGATCACACCAATCTT---AATCCTTTTTAT-----TCCAAGGCA---AGTATT---  
AAACAATCACTTATTCGTCAT-----CAAGGAACT-----  
ATTCGTACGTTGTTGAATAAAAAATAAGGAATGCCAA-----  
TCCTTGATAACTTTGTCATCATCTAATTGTTCTCGAATAGAT-----CCATTC-----AACAGGTTG---  
AAATATCACAAAC-----AACATGATAAAA---AAATCAAAT-----AAAAGA-----  
-----  
-----GATATCTACCCCAATT-----CGTAATTTGTTGGGTCCTTTAGGAATT--  
-ATCCCTAAAATTACGAATTTT---TTT---TCATTT---TATTATTTAATAACTCATAATCAAATC---  
TTGGTAAAAAAAATTCGCAGCTTGACAAT-----TTAAAACGGACTTCCCA-----GTACTT-----  
-----  
AAATATTATTTAATAGATGAAAATGGACGAATTTTTAATCCGGACCCATCCATTAACATGATTTTGAATCCATTCAATTG  
GAATTGGTATTTTATCCATCACGAT-----  
-----TATTGTGAAGAA---ACATCGACA-----  
ATAATTAACCTTGGACAGTTTTTTTTGTGAA-----AATGTATGTATATCG-----AAATCTGGACCA-----  
CATCTAAAA-----  
TCGGGGCAGGTTCTAATTGTTGATGTTGACTCTTTAGTAATAAGATCTGCAAAGCCCTATTTGGCTACTCCAGGAGCAAC  
CGTTCATGGCCATTATGGGGAAATCCTTTACGAAGGAGATACATTAGTTACATTTATATATGAAAAATCGAGATCGGGTG  
ATATAACG---  
CAAGGTCTTCCAAAAGTAGAACAAGTGTAGAAAGTTCGTTTCGATTGATTCAATATCAATGAACTTGGAAAACCGGGTTGA  
AGGTTGGAAC---  
GAACGTATAACAAGAAGTCTTGGGATTCTTGGGGATTCTTGATTGGCGCTGAGCTAACCATAGCACAAAGTCGTATATC  
TTTGGTTAATAAGATTCAAAAGGTTTATCGCTCGCAGGGCGTGCAGATACATAATAGGCATATAGAAATTATTGTACGTC  
AAATAACATCAAAGTGTGGTTTTCAGAAGATGGAATGTCTAATGTTTTTCCACCGGTGAATTAATTGGATTGTTGAGG  
GCGGAACGAACGGGGCGCGCTTTGGAAGAAGCGATCTGTTACCGAGCCGTTTTATTAGGAATAACGAGGGCATCTCTGAA  
TACTCAAAGTTTCATATCTGAAGCGAGTTTTCAAGAACTGCTAGAGTTTTAGCAAAGCCGCTTTACGAGGTCGTATTG  
ATTGGTTGAAAGGACTGAAAGAGAATGTTGTTCTGGGGGATGATACCCGTTGGTACTGGATTCT---  
AAGGGATTAGTGCACCGTTTA-----AGCAATATTTCT-----TTGGAA-----ATCGAA--  
-----AAGAAGAACTA-----TTCAAGGGAGGCATGAGA---GATATTTGTTCCACCACAAA-----

GAATTGTTT-----GATTCTTGCATCCCCAGG-----AATTTCCCCGATACATCAGAACAATTA-----  
-----TTT-----

-----  
ATGATAAGAAGGTATTGGAACATAAATTTGGAAGAGATGATGGAAGCGGGAGTTTATTTTGGTCATGGTACTAGAAAAGTG  
GAATCCTAGAATGGCACCTTATATCTCTGCA-----  
AAGCGTAAAGGTATTCATATTATAAATCTTACTAGAACTGCTCGTTTTTTTATCAGAAGCTTGTGATTTAGTTTTTGTATGC  
AGCAAGTCGAGGAAAACAATTTTTAATCGTTGGTACAAAAAATAAAGCAGCTGATTCAGTAGCATCGGCTGCAATAAGGG  
CTCGGTGTCATTATGTTAATAAAAAATGGCTCGGTGGTATGTTAACTAATTGGTCCACTACAGAAAACAAGACTTCATAAG  
TTCAGGGACTTGAGAGCAGAGCAAAAAGATGGGAAGACTCAACCATCTTCCGAAACGAGATTCAGCAATGCTCAAGAGACA  
ATTATCTCACTTGCAAACATATCTAGGCGGCATCAAATATATGACGGGATTGCCGATATTGTAATCATCGTTGATCAGC  
AAGAAGAATATACGGCTCTTCGAGAGTGTATTACTTTGGGAATTCACAACAATTTGTTAATCGATACAAATTGCGACCCG  
GATCTTGCAGATATTTTCGATTCCAGCCAATGATGACGCGATAGCTTCAATCCGATTAATTCTTACTAACTAGTATCCCG  
AATTTGTGAGGGTCTGTTCTAGCTAT-----ATAAGAAAT-----

-----ATGGGACAAAAATAAATCCACTCGGGTTCGGCTTGGT---  
ACAACCCAAAGCCATCATTCTGTTTGGTTTGCACAACCAAAA---  
AATTATTCGGGGGTCTCCAAGAAGATAAAAAAATAAAGGATTGTATCAAGAATTATGTACAA---AAA-----  
AATAGGAAAATATCCTCG-----  
-----GGTGTGAGGGA-----

ATTGCACGGATAAAGATTAATAAAGAATCGATCTGATCCAGGTCATAATATATATGGGATTCCCAAAA-----  
-----TTTTTA---GAGGGCAACCCACAA-----GGAATC-----

GAAGAATTACAGAGCAATATACAAAAAGAATTT---  
AATTCTGTGAACCAAAAACCTTAACATTGCTATCACAAGAATTGCAAAAACCTTATGGGCAACCTAATATTCTTGCAGAATT  
TATAGCTGGACAATTAAGAATCGAGTTTCATTTGAAAGGCAATGAAAAAGCTATTGAATTAAGTGAACAGGCAGATA  
CAAAAGGA---ATTCAAATACAAATTCAGGGCGTATTGACGGAAAA-----  
GAAATAGCACGTGTCGAATGGATCAGAGAAGGTAGGGTTCCTTACAAACCATTTCAGCCAAAATTGATTATTGTTCTTA  
TACAGTTGAACTATTTATGGGGCATTAGGAATCAAAATTTGGATATTTGCAGGCGAGGAA---  
ATGTCTCGTTACCGAGGGCCTCGTTTCAAAAAAATACGCCGTCTGGGTGTTTTACCGGGACTAACTAGT-----  
AAAAGGCCG-----

ACACCCGGAAGTGATCTTAGAAACCAATCGCGCCCCGGG-----AAAAGA---  
TCTCAATATCGTATTCGTCTAGAAGAAAAACAAAATTTGCGTTTTTATTATGGTCTCACAGAGAGACAATTACTTAAATA  
CGTTCATATCGCTGGAAAAGCGAAAGGGTCAACAGGTCAGGTTTTACTACAATTACTT

Spinacia -----

-----  
AAAAAATATTTTGTGTTTGGTTCGGCCGGTAGTCCCATATGAAATAACGGACGGTATCAAT-----  
TTAGCAACACTTTTCCCTCAGGATTTGTTGCAGGAAAGGGATAATGTGCAACTTCGAGTTGTCAATTATATCCTTTATGG  
AAATGGTAAAGTCACTCGAGGAATTTCTGAC-----

ACAAGTATTCATTTAGTACGTACTTGTGTTAGTATTGAATTGGAATCAAGAT-----AAAAAAGGTTCTTCTATC-----  
-GAA---

GAGGCCCGCGGTTCCCTTTGTTGAAGTAAGAACAAATGGTATGATTCAAGATTTCTTAAAGGTCAATTTAGTGAAACCCGC  
TATTTTCATAT-----ATC---AGTAAAAGAAATGATCCATCA-----

TCCGAAAAAAGGAGGGATCAGATCATAACCAATATG---AATCCATTTTATTCCATTTATATTTAT---CCAAAGACA--  
-AAACTT---CAAAAATCATTTAACCAAAAC-----CAAGGAAC-----

GTCCGTACGTTGTTGGGTATAAAACAAAGAATGTCAA-----  
TTTTTTTTTAATTTTGTATCATCAATTTGTTTTCGAATAGGT-----CCATTC-----AAGGGTGTGTC---

AAATATCCC-----AAA---GAATTAATT-----AAAAA-----  
-----

-----GATCCCCTAATTCCAATT-----AGGAATTCATTTGGTCTTTTAGGAACA--  
-GCCCTTCAAATTTGCTAATTTT---TTT---TCATTT---TACTATTTAATAACTCATAATCAGATC---

TTGGTAACTAATTTTGAACCTTGACAAT-----TTAAAACAAACCTTTCAA-----CCATTT-----  
AAATTT-----

CAATATTATTTAATGGATGAAAATGGAAGAATTTATAATCCCGATCCATGCAGTAACATCATTTTTAATCCATTCAAGTT

GAATTGGTATTTTCTTCATTATCAT-----  
-----TTTTGTGAAGAG---ACATCCACC-----  
AAAATTGATCTTGGACAATTTGTTTGTGAA-----AATGTATGTATAACC-----AAAAAAGGAACG-----  
CACCTAAAA-----  
TCGGGTCAAGTTCTAATTGTTCAATTTGACTCTGTAGTAATAAGATCGGCTAAGCCTTATTTGGCTACTCCAGGAGCAAC  
ACTTCATGGTCATTATGGAGAAATCATTATGAAGGGGATACATTAGTTACATTTATATATGAAAAATCGAGGTCTGGTG  
ACATAACG---  
CAAGGTCTTCCAAAAGTGAACAAGTCTTAGAAGTTCGTTTCGATTGATTCAATATCCATCAATCTAGAAAAGAGGATTGA  
TAGTTGGAAC---  
GAACGTATAACAAGAATTCTTGGAAAGTCTTGGGGATTCTTGATTGGGGCTGAGCTAACTATAGCGCAAAGTCGTATTTCT  
TTTGGTTAACAAGATCCAAAAGGTTTATCGATCACAAGGGGTGCAGATCCATAATAGACATATAGAAATTATTGTACGTC  
AAATAACATCAAAAAGTCTTGGTTTTCAGAAGATGGAATGTCTAATGTTTTTTTTGCCCGGAGAATAATTGGATTGTTTCGG  
GCGGAACGAACGGGACGCGCTTTGGAAGAAGCGATATGTTACCGCGCTACCTTATTGGGAATAACGAGAGCATCTCTGAA  
TACTCAAAGTTTTATCTCCGAAGCGAGTTTTCAAGAACTGCTCGAGTTTTAGCAAAGCAGCTCTACGGGGCCGTATTG  
ATTGGTTGAAAGGACTAAAAGAAAACGTTGTTCTGGGGGGGATGATACCTGTTGGTACCGGATTC---  
AAAGGATTTCGTACACCATTCA-----AGTCAACATAAGGACATTCCT-----TTGAAA-----ACAAAA--  
-----AAGCAGAATTTA-----TTCGAGGGAGAAATGGGA---GATATTTTGTTTTACCACAGA-----  
GAATTATTT-----GAGTCTTGTCTTTCAAAG-----AAT-----

ATGACAAGAAGATATTGGAACATCAATTTGGAAGAGATGATGGAAGCGGGAGTTCATTTTGGTCCAGGTACTCGGAAATG  
GAATCCTCGAATGTCGCCTTATATCTCTGCA-----  
AAATGTAAAGGTATTCTATATTATAAATCTTACTAGAAGTCTCGTTTTTTTATCAGAGGCTTGTGATTTAGTTTTTGTATGC  
ATCAAGTAGAGGAAAACAATTTTTAATTGTTGGGACAAAAAATAAAGCAGCTGATTCAGTAGCACGGGCTGCAATAAGGG  
CTCGCTGTCATTATGTTAATAAAAAGTGGCTTGGGGGTATGTTAACGAATTGGTCCACGACAGAAACGAGACTTCACAAA  
TTCAGGGACTTGAGAATGGAACAAACGGCAGGGAGACTCGCTCGTCTTCCAAAGAGAGATGCGGCGGTGGTGAAGAGACA  
ATTATCTCACTTGCAAACATATTTGGGTGGGATCAAATATATGACAGGGTTACCGGATATTGTAATCATCGTTGATCAAC  
AGGAAGAATATACGGCCCTTCGAGAATGTATTACTTTGGGAATTCCAACATTTGTTAATTGATACAAATTGTAACCCG  
GATCTCGCAGATATTTTCGATTCCGGCAAATGATGACGCTATAGCTTCAATTCGATTAATTCTTACCAAATTAGTATTTGC  
AATTTGTGAAGGCCGCTCTAGCTAT-----ATAAGAAATCCT-----  
-----ATGGGACAAAAAATAAATCCACTTGGTTTTCCGACTTGGT---  
ACAACACAAAGTCATTATTCCTTTGGTTTTTACAACCAAAA---  
AACTATGCAGAAGGTCTACAAGAAGATCAAAAAATAAGGGATTGTATAAAAAATTATGTACAA---AAA-----  
AATACAAAAACATCCTCG-----  
-----GGTGTGCAAGGA-----  
ATTGCACGTATTGAAATTCAAAAAGAATCGATCTGATACAGGTGATAATCCATATGGGATTCCCAAAA-----  
-----TTATTAATAGAAAATAGACCACAA-----GGGGTC-----  
GAAGACCTAAAAATAAATGTACAAAAAGAATTG---  
AATTGCGTGAACCGAAAACCTCAACATCGCTATTACAAGAATTGCAAAACCTTACGGGGACCCTAATATTCTTGCAGAATT  
TATAGCCGGACAACATAAAGAGTAGGGTATCATTTCGAAAAGCAATGAAAAAAGCTATCGAATTAACCGAACAAGCTGATA  
CAAAAGGA---ATTCAAATCCAAATTGCCGGCCGTATCGATGGAAAA-----  
GAAATTGCACGTATCGAATGGATAAGAGAAGGTAGGGTTCCCCTACAACGATTTCGCGCAAAAATCGATTATTGTGCCTA  
TACCGTTTCAACAATCTATGGCGTATTGGGGATAAAAAATTTGGATATTTATGGGCGAGGAA---  
ATGTCGCGTTACCGAGGGCCTCGTTTTCAAAAAAATACGCCGTCTAGGAGCTTTACCTGGACTAACTAAT-----  
AAAAGGCCT-----  
AGAGCCGGAAGTGATCTTAGAAACCAATCACGTTCCGGG-----AAAAGA---  
TCTCAATATCGTATTCGTCTAGAAGAAAAACAAAAATTGCGTTTTTCATTATGGTATTACAGAACGACAATTACTTAAATA  
CGTTTCGTATCGCCAGAAAAGCCAAAGGGTCAACAGGTTCAGGTTTTACTACAATTACTT

Triticum

GAAAAGTATTTTGTTCGTTTCGCCCTACAGTGGCATATGAAATGGACGAAGGAAGAAAT-----  
TTAGCAACACTTTTCCCGCAGGATCTCTTGAAGAAGAAAATAATCTCCAAATTCGACTTGTCAATTTTATTTCTCATGA



AAATAGCAAGTTAACTCAAAGAATTTATCAC-----  
ACAAATAGTCAATTTGTTAGAAGCTTGCTTAGTAGTGAATTGGGAACAAGAA-----GAAAA-----  
-GAA--  
AAGGCTGGTGTCTCCCTTGTTGAGGTAAGAGCAAATGATCTTATTCGCGATTTCTTAAGAATTGAGTTAGTCAAGTCCAC  
TATTTTCGTAT-----ACA---CGAAAAAGGTATGATAGGACAAGTGCAGGACCGATTCCCCAT-----  
AATAGGTTAGATCGCGCCAATATC---AATTCTTTTTAT-----TCCAAGGCG---AAGATT-----  
-GAATCACTTAGCCAACAT-----CCAGAAGCT-----  
ATTGGCACTTTGTTGAATCGAAATAAAGAATACCAC-----  
TCTTTGATGATTTGTGCGGCATCCAAGCTGTTCTCGAATTGGT-----TTATTC-----AAGAATTCA---  
AAACATCCC-----AATGCGATAAAA---GAATGGAAT-----  
-----  
-----CCTAGAATTCCTATT-----  
CGAGAAATTTTTGGGCCCTTAGGCGCTATTGTAGCTAGTATATCGCATTTT---TCT---TCATCT---  
TACTATTTACTAACGCATAATAAATC---CTGTTAATAAAAATATTTGTTGTTGACAAT-----  
TTAAAACAAACCTTCCAA-----GTACTTCAAGAAGCT-----  
-----AAATACTCTTTAATAGATGAAAATAAAGGATTTCTAATTTTCGAT-----  
AGTAACATAATGTTGGATCCATTCTTTTGAATTGTCACTTTGTCCATCATGAT-----  
-----TCTTGGGAAGAG---ACATTGGCA-  
-----ATAATTCACCTTGGACAATTTATTTGTGAA-----AATGTATGTCTATTT-----AAA-----TCG-----  
CACATAAAAAA---  
TCCGGTCAAATTTTCATTGTAATATGAATTCCTTTGTTATAAGAGCAGCTAAACCTTATTTGGCCACTACAGGAGCAAC  
TGTTAATGGTCAATTATGGAGAAATCCTTTACAAGGGGAGATAGGTTAGTTACGTTTATATATGAAAAATCGAGATCTAGTG  
ACATAACG---  
CAAGGTCTTCCAAAAGTGGAACAAATCTTTGAAGCGCGTTCAATTGATTCATTATCCCCGAATCTCGAAAGGAGAATTGA  
GGATTGGAAT---  
GAGCGTATACCAAAGAATTCTTGGGGTCCCTTGGGGATTCTTGATTGGAGCTGAGCTAACCATAGCCCCAAAGTCGTATCTC  
TTTGTTTAATAAAAAATCCAAAAGGTTTTATCGATCCCAAGGGGTACAGATCCATAATAGACATATAGAGATTATTATACGCC  
AAGTAACATCAAAGTGCAGGTTTTCCGAAGATGGAATGTCTAATGTTTTTTCGCTGGGGAATTAATCGACTATTGCGA  
GCGGAACGAGCAGGGCGAGCTTTGGATGAATCGATCTATTATCGGGCAATCTTATTGGGAATAACAAGGGCTTCCCTGAA  
TACCCAAAGTTTTCATATCTGAAGCAAGTTTTCAAGAACTGCTCGAGTTTTAGCAAAGCTGCCCTACGAGGTGCGATTG  
ATTGGTTGAAAGGCTTGAAGAAAACGTAGTTCTGGGGGGGATTATACCTGTTGGTACCGGATT-----  
CAAAAATTTGTGCATCGTTCC-----CCACAAGACAAGAACCTTTAT-----TTCGAA-----ATAAAA--  
-----AAAAAAAATCTA-----TTGCGCTCGGAAATGAGA---GATTTTTTGTCTCCATACA-----  
GAATTAGTTTCTTCAGATTCTGACGTAACAAAC-----AATTTTTATGAGACA-----  
-----  
-----  
-----  
-----  
-----  
-----  
-----  
-----  
-----  
ATGACAAGAAGATATTGGAACATTAATTTGAAAGAGATGATAGAAGCAGGAGTTCATTTTGGTCATGGTATTAAGAAATG  
GAATCCTAAAATGGCCCCTTACATTTCCGCA-----  
AAGCGTAAAGGTACTCATATTATAAATCTCGCTAGAACGGCTCGTTTTTTATCAGAAGCTTGTGATTAGTTTTTGTATGC  
AGCAAGTCAGGGAAAAAGTTTTCTAATTGTTGGTACCAAAAAAAGAGCAACAGATTTAGTAGCATCAGCTGCAATAAGGG  
CTCGTTGTCAATTATGTTAATAAAAAAGTGGTTCAGTGGTATGTTAACGAATTGGTTCGATTACGAAAAGTAGACTTTCTCAA  
TTTLAGAGACTTAAGAGCAGAAGAAAAAATGGGAAAATCCACCATCTCCAAAAAGAGATGTGGCAATCTTGAAGAGAAA  
ATTATCTACCTTGCAAAGGTATCTCGGCGGGATCAAAATATATGACGAGATTGCCAGACATTGTGATCGTCTTGATCAGC  
AAAAAGAGTATATAGCTCTTCGGGAATGTGCCATTTTGGGGATTCCACTATTTCTTTAGTCGATACAAATTGTGACCCG  
GATCTCGCAATATATCGATTCCAGCCAACGATGACACTATGACTTCAATTCGATTGATTCTTAACAAATAGTATTTTT  
AATTTGTGAGGGCCGTTCTCTCTAT-----ATAAGAAATCGT-----  
-----ATGGGACAAAAATAAATCCACTCGGTTTTAGACTTGGT---  
ACAACCCAAAAACACCATTCTTTTTGGTTTCGCACAACCAAAA---  
AATTTATCGGAAGGTCTACAGGAAGATAAAAAAATAAGGGATTGTATCAAGAACTATATACAA---AAG-----  
AATAGGAAAAAGGGCTCGAATAGAAAAATAGAATCAGACTCAAGTTCCGAAGTAATTACACATAATAGAAAAATGGACTC  
AGGTTCAAGTTCGAAGTA-----

ATTACACATATAGAAATCCAAAAAGAAATCGATACGATCCACGTCATAATCCATATTGGATTCCCAAAT-----  
-----TTATTAAGAAAAAGGA-----GCAATC-----  
GAAGAATTAGAGAAAGATCTACAAAAGGAAATT---  
AACTCTGTAAACCAGAGATTTAATATTTCTATCGAAAAAGTTAAAGAACCTTATAGACAGCCTAACATTCTTGCAGAATA  
TATAGCTTTCCAATTAATAAATAGAGTTTTATTCCGAAAGGCAATGAAAAAGCCATTGAATTAACTAAAAAGCAGATA  
TAAGGGGA---GTAAAAGTAAAAATTGCGGGTCTGCTCGGAGGAAAA-----  
GAAATTGCACGCGCCGAATCCATTAAAAAGGGTAGACTTCCCCTCCAAACAATTGCGGCTAAAATTGATTATTGCTGCTA  
TCCAATTCGGACTATCTATGGAGTATTAGGTGTAAAAATTTGGATATTTCGTAGACGAAGAA---  
ATGTCCCCTTATCGAGGACCTCGTTTTAAAAAAAATACGCCGTCTGGGAGCTTTACCAGGACTCACTAGA-----  
AAAACACCT-----  
AAATCCGGAAGTAATCTTAAAAAAAATTC AATTCTGGG-----AAAAAG---  
GAGCAATATCGTATTCGTCTTCAAGAAAAACAGAAATTGCGTTTTTATTATGGTCTGACAGAACGACAATTACTTAGATA  
TGTACATATCGCTGGAAAAGCAAAAAGGTCAACAGGCCAGGTTTTACTACAATTACTT

Typha

-----  
AAAAAGTATTTTGTTCGGTTCGACCTGTAGTCACATATGAAATAGCCGATGGGATAAAT-----  
TTAGCAACACTTTTCCCTCAGGATCTCTTGCAGGAAAAGGATAACGTCCAACCTTAGAGTTGTCAATTATATCCTTTATGG  
AAATGGCAAGTCAATTTCGAGGAATTTACCAC-----  
ACAAGTATTC AATTAGTTTCGGACTTGCTTAGTATTGAATTGGGACCACGAA-----CAAACGGT---TCCAGA-----  
-GAA---  
GAGTTTCATGCTTCCTTTGTTCAAGTAAGGGCAAATGATCTGATTTCGCGATTTTATAAGAATTGACTTAGTCAAGTCCAC  
TATTTTCGTAT-----ACC---GGAAAAAGGTATGATAGGGCAAGTTTCAGGATTGATTCCCGAT-----  
AATGGATTAGATCGCACCAATACA---AATCCTTTTTAT-----TCCAAGGTG---AAGATT-----  
-CAATCACTTAGCCAACAT-----CGAGGAACT-----  
GTTGGTACGTTGTTGAATCGAACTAAGGAATGCCGA-----  
TCTTTGCTAATTTTGTTCATCATCCAATTGTTCTCGAATTGGT-----CCATTC-----AATAGTTTCG---  
AAATATAAC-----AATGTGACAAA---GAATCAGAT-----

-----  
-----CCCAT AATACCAATT-----  
ATGGATTTTATTGGGTCCCTTAGGAACGATTGTACCTAAAATATCGAATTTT---TAT---TCATCT---  
TACCATTTAATAACTCATAATCAGATC---TTGTTAAAGAAATATTTGCTACTTGACAAT-----  
TTCAAAGAGACTTTTTCAA-----GTACTTCAAGTACTT-----

-----  
AAATATTTTTTAATAGATGAAATGGGAGGATTTATAATCCCGATCCATGCAGTAACATCATTTTTGAACCCCTTCCATTT  
GGATTGGTGTCTTCTCCATCAGAT-----TATTGGGAAGAG---GCATCAACA-----  
ATAATTAGCCTTGGACAATTTATTTGTGAA-----AATGTATGTCTATTT-----AAATACGAACCA-----  
CACATAAAAAA---  
TCTGGGCAAATTTAATTGTTAATGTTGACTCTTTAGTTATACGATCAGCTAAGCCTTATTTGGCCACTCCAGGAGCAAC  
TGTTTCATGGTCATTATGGGGAAATCCTTTACGAAGGAGATACATTAGTTACATTTATATATGAAAAATCGAGATCTGGTG  
ACATAACG---  
CAAGGTCTTCCAAAAGTGAACAAATCTTAGAAGTGCGTTTCGATTGATTCAATATCGATGAACCTCGAAAGGAGAGTTGA  
AGGTTGGAAC---  
GAACGTATACCAAGAATCTTGGGATCCCCTGGGGGTTCTTAATTGGAGCTGAGCTAACCATAGCTCAAAGTCGTATCTC  
TTTGGTTAATAAGATCCAAAAGGTTTATCGATCCCAGGGGTACAGATCCATAATAGACATATAGAGATTATTGTACGTC  
AAGTAACATCAAAGTATTGGTTTCAGAAGATGGAATGTCTAATGTTTTTTTCCCTGGAGAATTAATCGGATTGTTGCGA  
GCGGAACGCGCAGGGCGCGCTTTGAATGAATCGATCTGTTATCGGGCAATCTTATTGGGAATAACAAGAGCATCTCTGAA  
TACTCAAAGTTTCATATCCGAAGCAAGTTTTCAAGAACTGCTCGAGTTTTAGCAAAGCTGCTTTACGAGGTCGTATTG  
ATTGGTTGAAAGGCCTGAAAGAGAACGTTGTTCTAGGGGGGATTATACCTGTTGGTACTGGATTCC---  
CAAAAATTTGTGCATCGTTCA-----AGGCAAGACAAGAACATTTAT-----TTGGAA-----ATCAAA---  
-----AGAAAAATCTA-----TTCGAGTTGGAAACGAAA---GATATTTTGTACACCATAGA-----  
GAATTATTT-----TGTTCTTACGTGACAAACAATTTCCATGAAACAATTTCCATGAGACATCAGAAAAATCA-----  
-----TTTATG-----CGATTTAATGATTCC-----

-----  
-----  
-----  
ATGACAAGAAGATATTGGAACATCAATTTGGAAGAGATGATGGAAGCAGGAGTTTCAATTTGGTCATGGTACTAAGAAATG  
GAATCCTAGAAATGGCCCCTTACATCTCGGCA-----  
AAGCGTAAAGGTATTCATATTACAAATCTCGCTAGAACCCTCGGTTTTTATCAGAAGCCTGTGATTTAGTTTTTGATGC  
AGCAAGTAGGGGAAAAAGCTTCTTAATCGTTGGTACCAAAAATAAAGCAGCGGATTTAGTAGCATCAGCTGCAATAAGGG  
CTCGATGTCATTATGTTAATAAAAAATGGCTCGGTGGTATGTTAACGAATTGGTCTACTACGAAACGAGACTTTCTAAG  
TTCAGGGATTTAAGAGCAGAAGAAAAGATGGGGAAACTCAACCGTCTCCCTAAAAGAGATGCAGCAATGTTGAAGAGAAA  
ATTATATACCTTACAAACATATCTCGGTGGGATCAAATATATGACGGGGTTGCCTGATATTGTGATCATCGTTGATCAGC  
AAGAAGAATATACGGCTCTTCGAGAATGTGCTATTTTGGGGATTCCGACGATTTGTTTAAATCGATACAAATTGTGACCCA  
GATCTCGCAGATATTTGATTTCCAGCCAACGATGACGCTATAGCTTCAATTCGATTGATTCTTAACAAATTAGTATCCGC  
AATTTGTGAGGGTCTGTTCTAGCTAT-----ATAAGAAAT-----  
-----ATGGGACAAAAATAAATCCACTTGGTTTTGACTTGGT---  
ACAACCCAAAGTCATCATTCTTTTTGGTTTCGCACAACCAAAA---  
AATTATTCCGCGGGTCTACAGGAAGATGAAAAAATACGGAATTGTATCAAGAACTATGTACAA---AAG-----  
AATAGGAGAATATCCTCA-----  
-----GGTTTTGAAGGA-----  
ATTGCACGTATAGGAATTCAAAAAAAATCGATTTGATCCAGGTCATAATCCATATTGGATTCCCAAAT-----  
-----TTATTAATCGAGGGGCAAACACGA-----GGAATC-----  
GAAGAATTGCAGATAAATGTACAAAAAGAGTTT---  
TATTCTGTAAACCGAAGACTCAACATTGCTATCACAAGAGTTGAAAAACCTTATGGACAACCTAATATTCTTTTCAGAATA  
TATAGCTTTACAATTAAAAAATAGAGTTTCGTTTCGAAAAGCAATGAAAAAAGCTATTGAATTAACTGAACAAACGGATA  
CAAAAGGA---ATTCAAGTGCAAATTGCAGGCCGTATCGACGGAAA-----  
GAAATTGCACGTGTGCAATGGATCAGAGAGGGTAGAGTTCCCTACAAACAATTTCGCGCTAAAATTGATCATTGTTTCTTA  
TACAATTCGAACTATCTATGGAGTATTAGGCATAAAAAATTTGGATATTTGTAGACGACGAA---  
ATGTCTCGTTACCGAGGACCTCGTTTCAAAAAAATACGCCGTCTGGGAGCTTTACCAGGACTAACTAGT-----  
AAAAGACCT-----  
AGATCCGGAAGTGATCTTAAAAACCAATTGCGTTCTGGT-----AAAAGA---  
TCGCAATATCGTATTCGTCTAGAAGAAAAACAGAAATTGCGTTTTATTATGGTCTGACAGAGCGACAATTACTTAGATA  
TGTACATATCGCTGGAAAAGCCAAAGGGTCAACAGGTCAGGTTTTACTACAACACTACTT  
Vitis -----  
-----

AAAAAGTATTTTGTGTTTTGGTTTCGACCCGTAGTCACATATGAAATAGCGGACGGTATAAAT-----  
TTAGCAACACTTTTCCCTCAGGATCTGTTGCAGGAAAGGGATAATATGCACCTTCAAGTTGTCAATTATATCCTTTATGG  
AAATGGCAAACCGATTTCGGGGAATTTCTGAT-----  
ACAAGTATTCAATTAGTTTCGGACTTGTTTAGTATTGAATTGGTACCAAGAA-----AAAAAAGTTCTCCTATC-----  
-GAA---  
AAGACCCATGCTTCTTTATGGAAGTAAGGACAAATGGTCTGATTTCGAGATTTCTTAACAATTAAGTTAGTAAATCCTA  
TATTTTCATAT-----ACC---GGAAAAAGGAATGATCCGTCAAGTTTCAGGATTGATCGCTGAT-----  
AATGGATCAGATCACACCAATATC---AATCCGTTTTATTCCATTTAT-----CCGAAGGAA---AGGATT---  
CAACAATTACTTAGACAAAGACAAAAAATAAAGGAATGCCAA-----  
ATTCGTACGTTATTAATAGAAATAAGGAATGCCAA-----  
TCTTTGATAATTTGTGATCATCCAATTGTTCTCGAATGGGT-----CCATTC-----AACGATGTA---  
AAATATCAC-----AATGTGATAAAA---GAATCAATT-----AAAAA-----  
-----

-----GATACCCCAATTTCAATT-----AGGAATTCGTTGGGTCTTTTAGGAACA--  
-GCCCTTCAAATTACGAATTTT---TAT---TCATTT---TACCATTTAATAACTCATAATCATATC---  
TTGGTAACTAAATATTTCCAACCTTGACAAT-----TTTAAACAGACTTTTCAA-----ACACTT-----  
-----

AAATATTATTTAATGGATGAAATGGGATAAATTATAATCCCGATCCATGCAGTAACATCATTTTTGAATCCATTCAATTT  
GAATTGGTATTTTCTCCATCATAAT-----  
-----TATTGTGAAGAG---ACATCCACA-----  
ATAATTAGTCTCGACAGTTTATTTGTGAA-----AATGTATGTATAGCC-----AAAAACGGACCA-----  
CACCTAAA-----  
TCAGGTCAAGTTCTAATTGTTCAAGTTGACTCTGTAGTAATAAGATCAGCTAAGCCTTATTTGGCTACTCTGGGAGCAAC

TGTTTCATGGACATTATGGGGAAATCCTTTACGAAGGAGATACATTAGTTACATTTATATATGAAAAATCAAGATCTGGTG  
ATATAACG---  
CAGGGTCTTCCAAAAGTGGAACAAGTGTTAGAAGTGC GTTCGATTGATTCCATATCGATGAACCTAGAAAAGAGAGTTGA  
GGGTTGGAAC---  
GAGCATATAACAAGAATTCTTGGAATTCCTTTGGGGATTCTTCATTGGTGCTGAGCTAACTATAGCGCAAAGTCGTATCTC  
TTTAGTTAATAAGATCCAAAAGGTTTATCGATCCCAGGGGGTTCAGATCCATAATAGGCATATAGAAAATTATTGTACGTC  
AAATAACATCAAAAAGTGTGGTTTTTCAGAAGATGGAATGTCTAATGTTTTTTCGCCCCGGAGAATAATTGGATTGTTGCGA  
GCGGAACGAACGGGGCGTGTCTTTCAAGAAGCTATTTGTTACCGAACCATTTTATTGGGAATAACGAGAGCGTCTCTGAA  
TACTCAAAGTTTCATATCCGAGGCGAGTTTTCAAGAACTGCTCGAGTTTTAGCAAAAAGCTGCTCTGTGGGGTTCGTATCG  
ATTGGTTGAAAGGCCATAAAGAAAACGTCGTTCTGGGGGGGATGATACCCGTTGGTACCGGATTT---  
AAAGGATTAGTGCACCGTTCA-----AGGCAACATAACAACATCCCT-----TTGGAAATGGAACCAA--  
-----AAGAATAATTTA-----TTCGAGAGGGAAATGAGA---GATATTTTTGTTCCACCACAGA-----  
GAATTATTT-----GATTCCTTGCAAGTTCAAAG-----AATTTCCATGATACATCAGAACAATCA-----  
-----TTTATG-----GGATTTAATGATTCC-----  
-----  
-----  
-----  
-----  
-----  
-----  
ATGACAAGAAGATATTGGAACATCAATTTGGAAGAGATGATGGAAGCAGGAGTTTCAATTTGGTCATGGTACTAGGAAATG  
GAATCCTAGAATGGCGCCTTATATCTCGGCA-----  
AAGCGTAAAGGTATTCATATTACAAATCTTACTAGAACTGCTCGCTTTTTATCAGAAGCTTGTGATTTAGTTTTTGATGC  
AGCAAGTAGGGGAAAACAATTCTTAATTGTTGGTACCAAAAATAAAGCAGCGGATTTCAGTAGCACGGGCTGCAATAAAGG  
CTCGGTGTCATTATGTTAATAAAAAATGGCTCGGTGGTATGTCAACGAATTGGTCCACTACAGAAAACGAGACTTCATAAA  
TTCAGGGACTTGAGAACGGAACAAAAGACGGGGAGACTCAATCGTCTTCCGAAAAGAGATGCAGCTATGTTGAAGAGACA  
ATTATCTCACTTGCAACATATTTGGGTGGGATTAATATATGACGGGGTTACCCGATATTGTAATAATCGTTGATCAGC  
AAGAAGAATATACGGCTCTTCGAGAATGTATCACTTTAGGAATCCAACGATTTGTTAATCGATACAAATTTGTGACCCC  
GATCTCGCAGATATTTGATTCCAGCAAATGATGACGCTATAGCTTCAATCCGATTAATTTCTTAATAAAATAGTATTGCG  
TATTTGTGAGGGTCTGTTCTAGCTAT-----ATAAGAAATCCT-----  
-----ATGGGACAAAAATAAATCCACTGGGTTTTGAGACTTGGT---  
ACAACCCAAGGTCATCATTGCTTTGGTTTTGCACAACCAA---  
AATTATTCCAAGGGTCTACAAGAAGATCAAAAAATACGGGATTGTATCAAGAATTATGTACAA---AAA-----  
AATATAAGAATATCCTCT-----  
-----GGTGTGAGGGA-----  
ATTGCACGTATAGAGATTCAAAAAGAATCGATCTGATTGAGGTCATAATCTATATGGGATTCCCAAAG-----  
-----TTATTAGTAGAAGGTAACCACGA-----AGAATT-----  
GAAGAATTACAGATGAATGTACAAAAGAATTG---  
AATTACGTGAACCGAAAACCTCAACATTGCTATTACAAGAATTACAAAACCTTACGGACATCCTAATATTCTTGCAGAATT  
TATAGCCGGACAATTAAGGAATAGAGTTTTCGTTTTCGCAAGGCAATAAAAAAGCTATTGAATTAACCTGAACAGGCAGATA  
CAAAAGGA---ATTCAAGTACAAATTGCAGGGCGTATCGACGGAAA-----  
GAAATTGCACGTGTTGAATGGATTAGAGAAGGAAGGGTTCCCTACAAACCATTTCGAGCTAAAATTGATTATTGTTCCCTA  
TAGAGTTGCAACTATATATGGGGTATTAGGCATCAAATTTGGATATTTGTAGACGAGGAA---  
ATGTGCGGTTACCGAGGGCCTCGTTTTCAAAAAATACGCCGTCTGGGGGCTTTACCGGGACTAACTAGT-----  
AAAAGGCCT-----  
AGAGCCGGAAGTGATCTTAGAAACCAATCGCGTTCCGGG-----AAAAGA---  
TCTCAATATCGTATTCGTCTAGAAGAAAAACAAAATTGCGTTTTTCAATTATGGTCTTACAGAACGCCAATTACTTAACTA  
TGTTGATATCGCCGAAAAGCCAAAGGGGCAACAGGTTCGGGTTTTACTCCAATTACTT  
Yucca  
-----  
-----  
AAAAAGTATTTTTGTTTTGGTTTCGGCCCGTAGTCACATATGAAATCGCTGATGGGATAAAT-----  
TTAGCGAAACTTTTCCCTCAAGATCTATTGCAGGAAAAAGAGAATGTCCAACCTAGAGTTGTCAATTATATCCTTTATGG  
AAATGGAAAGTCAATTTCGAGGAATTTCTCAC-----  
ACAAGTATTCATTTAGTTCGGACTTGCTTAGTATTGAATTGGGACCAAGAA-----AAAAACGGT---TCTATA-----  
-GAA---  
GAGGTTTCATGCTTCCTTTGTTGAGGTAAGGGCAAATGATCTGATTGCGGATTTTCATAAGAATTGAGTTAGTCAAGTCTAC  
TATTTTCATAT-----ACT---GGAAAAAGGTATGATACGGCGGGTTCAGGATTGATTCCCGAT-----

AATGGATTAGATCGCACCAATATC---AATCCTTTTTTAT-----TCCAAGGGG---AAGATT-----  
-CCATTAGTTACCCAGCAT-----CAAGAACT-----  
GTCGGTACGTTGTTGAATCGAAATAAGGAATGCCAA-----  
TCTTTGATAATTTTGTCATCATTCAATTTGTTTTCGAGTTGGT-----CCATTC-----AACGGTCCG---  
AAATATAAC-----AATGTGGCAA---GAGTCAAAT-----

-----CCTATAACTCCAATT-----  
AGGGATTTGTTGGGTCCTTAGGTAATACTAATAATAGTGAACTTT---TAT---TCATCT---  
TACCATTTAATAACTCATAATCAGATC---TTGTAAACAAATATTGGCTACTTGACAAT-----  
TTTAAACAGACTTTC---GTACTTGAAGTACTT-----

AAATACTGTTTTAATAAGATGAAATAGGAGGATTTATAATCCTGGTCCATGCAATAACATCATTTTGAATCCATTCCATTT  
GAATTGGTGCTTTCTACATTACAAT-----  
-----TATTGTGAAGAG---ACATCCACA-----

ATAATTAGCATTGGACAATTTATTTGTGAA-----AATATATGTCTATTT-----AAATATGGACCA-----  
CGCATAAAAAA---  
TCTGGTCAAATTTAATTGTTTCATGTTGACTCCTTAATTATAAGATCTGCTAAGCCCTATTTGGCCACTCCAGGGGCGAC  
TGTTTCATGGACATTATGGAGAAACCCTTTTGAAGGAGATACATTAGTTACATTTATATATGAAAATCCCGATCTGGTG  
ACATAACG---  
CAAGGTCTTCCAAAAGTGAACAAATCTTAGAAGTTCGCTCGATTGGTTCAATATCAATGAACCTTGAAAGGAGAGTTGA  
AGGTTGGAAC---

GAGCGTATACCAAGAATTCCTTGAATTCTTGGGGATTCTTAATTGGAGCTGAGCTAACCATAGCCCAAAGTCGTATCTC  
TTTGGTTAATAAGATCCAAAAGGTTTATCGATCCAGGGGTACAGATCCATAATAGACATATAGAGATTATTGTACGGC  
AAGTAACATCAAAAGTGTGGTTCAGAAAGATGGAATGTCTAATCTTTTTTTACCTGGAGAATTAATCGGATTGTTGCGA  
GCGGAACGAGCAGGGGCTGCTTTAGACGAAGCGATCTGTTATCGGGCAATTTTATTGGGAATAACGAGGGCATCTCTGAA  
TACTCAAAGTTTCATATCCGAAGCAAGTTTCAAGAAACTGCTAGAGTTTACAAAGTGTCTACGGGGTCGTATTG  
ATTGGTTGAAGGTTTGAAGAATAAATGTTGTTTGGGGTATTATCCCTGTCGGTACGGGATTC---  
AAAAAATTAGTGCACCTTCA-----AGGCAAGCAAAAAACATTTCAT-----TTGGAA-----ATCAA---  
-----AAGAAAAATCTA-----TTCGAGTTGGAAATGAGA---GATATTTGTTACACCATAGA-----  
GAATTTTTT-----TGTTCTTGGC-----AATTTCCATGACACACCAGAAAAATTA-----  
-----TTTACG-----CGAATTCATAATTCC-----

ATGACAAGAAGATATTGGAACATCCATTTGGAAGAGATGATGGAAGCAGGAGTTTATTTGGTTCATGGTACTAAGAAATG  
GAATCCTAGAATGGCCCCCTTATATCTCTGCA-----  
AAGCGTAAAGGTAATTCATATTATAAATCTTACTAGAACTGCTCGTTTTTATCAGAAGCCTGTGATTTAGTTTTTGATGC  
AGCAAGTCGAGGAAAAAATCTTAAATCGTTGGTACCAAAAATAAAGTAGCAGATTTAGTAGCATCAGCTGCAATAAGGG  
CTCGATGTCATTATGTTAATAGAAAATGGCTCGGTGGTATGTTAACGAATTTGGTCCACTACGGAAACGAGACTTCATAAG  
TTCAGAGACTTAAGAGCAGAACAAGAATGGGGAAACTCAACCGTCTCCCTAAAAGAGATGCAGCAATGTTGAAGAGAAA  
ATTATCTACTTTGCAAACATATCTGGGTGGGATCAAATATATGACGGGGTGCCTCATATTGTAATCATCGTCGATCAGC  
AAGAAGAATATACGGCTCTTCGAGAATGTGTCAATTTGGGAATCCGACAATTTGTTAATCGATACAAATTGTGACCCA  
GATCTTGCAGATATTTTCGATTCCAGCCAACGATGATGCTATAGCTTCAATCCGATTGATTCTTAACAAATTAGTATCCGC  
AATTTGTGAGGGTCGTTCTAGCTAT-----ATAAGAAGT-----  
-----ATGGGACAAAAAATAAATCCACTTGGTTTTAGACTTGGT---  
ACAACCCAAATCATCATTCTTTTGGTTCGCACAACCAAAA---  
AATTTTTCCGTAGGTCTACAAGAGGATGAGAAAATACGGAATTGTATCAAGAATATGTACAA---AAA-----  
AATAAGAGAATATCCCA-----

GGTTTCTGAAGGAATTGGAATTGCACGCATAGAAATTCAAAAAGAATCGATTTGATCCAAGTCATAATCTATATTGGGTT  
CCCAAAT-----TTATTAATAGAGGGACGAACACGA-----GGGATC-----  
GAAGAATTACAGATGAATGTACAAAAGAGTTT---  
CGTTCTGTGAACCGAAGACTCAACATTGCTACTACAAGAATAGAAAACCTTATGGACACCCTAATATTCTTGCAGAATA

TATGGCTTCACAATTAAGAAATAGAGTTTCGTTCCGAAAGGCAATGAAAAGAGCTATTGAATTAAGTGAACAAACAGATA  
CAAAGGGA---ATTCAAATACAAATTGCAGGGCGTATCGACGGAAAA-----  
GAAATTGCACGTGTCGAATGGATCAGAGAAGGTAGGGTTCTCTACAAACAATTTCGCGCTAAAATTGATCATTGTTCTTA  
TACAATTCGAACTATCCATGGAGTATTAGGCCTAAAAATTTGGATATTTGTGGATGAAGAA---  
ATGTCTCGTTACCGAGGACCTCGTTTCAAAAAAATACGCCGTCTGGGGACTTTACCGGGATTAAGTAGT-----  
AAAAGACCT-----  
AGATCCGGAAGTGATCTTAAAAACCCATTGCGTTCCGTG-----AAAAGA---  
TCGCAATATCGTATTCGTCTAGAAGAAAAACAGAAATTGCGTTTTTCATTATGGTCTGACAGAGCGACAATTACTTAGATA  
TGTGCATATCGCTGGAAAAGCCAAAGGGTCAACAGGCCAGGTTTTACTACAACACTACTT  
Zea -----

GAAAAGTATTTTGTTCGGTTTCGACCTGCAGTGCATATGAAATGGACGAAGGGATAAAT-----  
TTAGCAACACTTTTCCCGCAGGATCTCCTGCAAGAAGAGGATAATCTCCAACCTTCGACTTGTCAATTTTATTTCTCATGA  
AAATAGCAAGTTAACTCAAAGAATTTATCAC-----  
ACGAATAGTCAATTCGTTTCGAACTTGCTTAGTAGTGAATTGGGAACAAGAA-----GAAAA-----  
-GAG---  
GGAGCTCGTGCTTCTCTTGTGGAGGTA AAAACAAATGATCTAATTTCGCGATTTCTAAGAATTGAGTTAGTCAAGTCTAC  
TATTTTGTAT-----ACA---CGAAGAAGGTATGATAGGACAAGTGTAGGATTGATTCCCAAT-----  
AATAGGTTAGATCGCAACAATACC---AATTCCTTTTTAT-----TCCAAGGCG---AAGATT-----  
-CAATCACTTAGCCAACAT-----CAAGAAGTT-----  
ATTGGCACCTTGTGAATCGAAATAAAGAATATCCA-----  
TCTTTGATGATTTTGTGGCATCCAACCTGTTCTCGAATTGGT-----TTATTC-----AAGAATTCT---  
AAATATCCC-----AATGCGGTAAAA---GAATCGAAT-----

-----CCTAGAATTCCTATT-----  
CGAGATATTTTGGGCTCTTAGGCGTTATTGTACCTAGTATATCGAATTTT---TCT---TCATCT---  
TACTATTTATTAACGCATAATCAGATC---TTGTTAAAAAATACTTGTTCCTTGACAAT-----  
TTGAAACAAACCTTACAA-----GTACTTCAAGGACTT-----  
-----AAATACTCTTTAATAGACGAAAATAAAGGATTTTCGAATTTTGAC-----  
AGTAACATCATGTTGGAGCCATTCCATTTGAATTGGCACTTTCTCCATCATGAC-----  
-----TCATGGGAAGAG---ACATTGGCA-  
-----ATAATTCACCTTGGACAATTTATTTGTGAA-----AATTTATGTCTATTT-----AAA-----TTA-----  
CACATAAAAAAA---  
TCTGGTCAAATTTTCATTGTTAATATGGACTCCTTTGTTCTAAGAGCAGCTAAGCCTTATTTGGCCACTATAGGAGCAAC  
TGTTTCATGGTCATTATGGAAAAATCCTTTACAAAGGAGATAGGTTAGTTACGTTTATATATGAAAAATCGAGATCCAGTG  
ATATAACG---

CAAGGTCTTCCAAAAGTAGAACAAATCTTCGAAGCGCGTTCAATTGATTCACTATCGCCGAATCTCGAAAGGAGAATTGA  
GGATTGGAAT---  
GAACGTATACCAAGAATTCTTGGGGTTCCCTGGGGATTCTTGATTGGAGCTGAGCTAACCATAGCCCAAAGTCGTATCTC  
TTTGGTTAATAAGATCCAAAAGGTTTATCGATCCCAAGGGGTACAGATCCATAATAGACATATAGAGATTATTATACGCC  
AAGTAACATCAAAGTAAGGGTTTCCGAAGATGGAATGTCTAATGTTTTTTTACCTGGGGGAATTAATAGGACTATTGCGA  
GCGGAACGAGCAGGGCGGGCTTTAGATGAATCGATCTATTATCGGGCAATCTTATTGGGAATAACAAGGGCTTCCCTGAA  
TACCCAAAGTTTCATATCTGAAGCAAGTTTCAAGAACTGCTCGAGTTTGTAGCAAAGCTGCCCTACGAGGTCTGATTG  
ATTGGTTGAAAGGTCTGAAAGAAAACGTAGTTCTGGGGGGGATTATACCTGTTGGTACCGGATTC---  
CAAAAATTTGTGCATCGTTCC-----CCACAAGACAAGAACCCTTTAT-----TTAGAA-----ATTCAA--  
-----AAAAAAATCTA-----TTCGCGTCGGAAATGAGA---GATATTTGTTTCTCCATACA-----  
GAATTAGTTTCTGATTCTGACGTAACAAAC-----AATTTCTATGAAACATCAGAGACCCCG-----  
-----TTTACC-----CCTATTTATACGATT-----

-----  
ATGACAAGAAGATATTGGAACATCAATTTGAAAGAGATGATAGAAGCGGGAGTTTCAATTTGGTTCATGGTATTAAGAAATG  
GAATCCCAAATGGCCCCTTACATCTCGGCA-----

AAGCGTAAAGGTACTCATATTACAAATCTTGCTAGAACAGCTCGTTTTTTATCAGAAGCTTGTGATTTAGTTTTTGTATGC  
AGCAAGTCAGGGAAAAAGCTTCTTAATTGTTGGTACCAAAAAAAGAGCAGCGGATTTAGTAGCATCAGCTGCAATAAGGT  
CTCGTTGTCAATTATGTTAATAAAAAAGTGGTTCCAGCGGTATGTTAACGAATTGGTCGATTACCAAACTAGACTTTCTCAA  
TTTAGAGACTTAAAGAGCAGAAGAAAAAATGGGAAAATTCCACCATCTCCAAAAAGAGATGCGGCAATCTTAAAGAGAAA  
ATTATCTACCTTGCAAAGATATCTCGGCGGGATCAAATATATGACGAGGTTGCCTGACATTGTGATCGTCCTTGATCAGC  
AAAAAGAGTATATAGCTCTTCAGGAATGTGCCATTTTGGGGATTCTACTATTTCTTTAGTCGATACAAATTGTGACCCA  
GATCTTGCGAATATATCGATTCCCTGCCAACGATGACACTATGACTTCAATTTCGATTAATTCTTAACAAATTAGTATTTGC  
AATTTCTGAGGGCCGTTCTCTCTAT-----ATAAGAAATCGT-----  
-----ATGGGACAAAAATAAATCCACTCGGTTTCAGACTTGGT---  
ACAACCCAAAATCACCATTCTTTTGGTTTCGCACAACCAAAA---  
AATTATTCTGAAGGTCTACAGGAAGATAAAAAAATACGGAATTGTATCAAGAACTATATACAA---AAG-----  
AATAGGAAAAAAGGCTCGAATAGAAAAAATGGAATCAGACTCA-----  
-----AGTTCTGAAGTA-----  
ATTACACATATAGAAATTCAAAAAGAAATCGATACAATCCACGTCATAATCCATATTGGATTCCCCAAC-----  
-----TTATTAAGAAAAAGGGA-----GCAATC-----  
GAAGAATTAGAGAAAGATCTCCAAAAGGAAGTT---  
AATTCTGTAAACCAGAGACTTAATATTGCTATCGAAAAGGTTAAAGAACCTTATAGACAACCTAATATTCTTGCGGAATA  
TATAGCTTTCCAATTAAAAAATAGAGTTTCATTCCGAAAAGCAATGAAAAAAGCTATTGAATTAATAAAAAAGCGGATA  
TAAAGGGA---ATAAAAATCCAAATTGCGGGTCTGCTAGCAGGAAAA-----  
GAAATTGCACGTGCCGAATGCATCAAAAAGGGTAGACTACCCCTCAAACAATTTCGCGCTAAAATTGATTATTGCTGCTA  
TCCAATTCGAATCTATGGAGTATTAGGTGTCAAATTTGGATATTTCGTAGAAGAAGAA---  
ATGTCCCCTTATCGAGGGCCTCGTTTAAAAAATAACGCCGTCTGGGAGCTTTACCAGGACTCACTAGA-----  
AAAACGCCT-----  
AAATCCGGAAGTAATCAGAAAAAGAAATCCATTCTGGG-----AAAAA---  
GAGCAATATCGTATTCGTCTTCAAGAAAAACAGAAATTGCGTTTTTATTATGGTCTGACAGAACGACAATTACTTAGATA  
TGTACATATCGCTGGAAAAGCAAAAAGATCCACAGGTCAGGTTTTACTACAATTACTT

Acorus

GAAATGCGTTTTGGATAACATCCTTTTTTCGATTGGGTATGGCTCCTACGATTCTGGAGCCCAGCAATTAGTTAACCATAG  
ACATATTTTAGTTAATGGTCGTATAGTAGATATACCAAGTTATCGTTGCAAACCCAGAGACATTATTACTACGAAGGATA  
AGCAAAGATCGAAAGTTCTGATTCAAATAATATGGATTTCATCGACCCGCGAG-----  
GAATTGCCAAAACATTTGACTCTT-----GACTCATTCCAA-----  
CATAAAGGATTAGTAAATCAAATCATAGATAGTAAATGGGTTCGTTTTGAAA---  
ATTAATGAGTTGTTAGTTGTGGAATATTATTCCCGCCAGACT-----  
ATGTCACGTGAGGTTACTGCAGAAGAAAAAATGCAAAAATCCGATCCAATTTATCGTAATCGATTAGTTAACATGTTGGT  
TAACCGTATTCTGAAACACGGAAAAAATCATTGGCTTATCAAATTTATCTATCGAGCCTTGAAAAAGATTCAACAAAAGA  
CAGAAACAAATCCACTATCTGTTTTACGTCAAGCAATACGTGGAGTAACTCCCGATATAGCAGTA-----  
AAATCAAGACGT---  
GTAGGCGGATCGACTCATCAAGTTTCTATTGAAATAGGATCTACACAAGGAAAAGCACTTGCCATTGCTTGGTTATTAGC  
GGCATCCCGAAAACGTCCGGGTGCAAAATATGGCTTTCAAATTAAGTTCCGAATTAGTAGATGCTGCCAAAGGGAGTGGCG  
ATGCC---ATACGCAAAAAGGAAGAGACTCATAAATGGCAGAGGCAATAGAGCTTTTGCACATTTTCTG-----  
---  
ATGGGTAAGGACACTATTGCCGATATAATAACTTCTATAAGAAATGCTCAAATGGCTAAAAAAGGGACAGTTCGAATAGC  
ATCTACGAATCTT-----  
ACCGAAAACGTTGTTAAATACTTCTGCGAGAAGGTTTTATTGAAAACGTTAGAAAACATCGGGAAAGTAATAAA-----  
-GATTTCTTGGTTTTAACCTGCGACAT-----AGAAGGACTAGGAAAGGG-----ATATATAGAACT-----ATT-  
-----  
TTAAAGCGTATCAGCCGACCTGGTTTACGAATCTATTCCAATCAAGGAATTTCCAAAGATTTTAGCGGGAATAGGGAT  
TGTAATTGTTTTCTACTTCTAGAGGTATAATGACAGATCGGGAGGCTCGACTACAGGGAATTGGAGGAGAAATGTTATGTT  
ATATA-----ATGACAAAACATAACCAAGAATTGGT---TCACGT-----  
AGGAATGGACGTATTGGTTTACGTAAGACTGGACGTAGA---  
ATACCAAAAGGAATTATTCATGTTTCAGGCAAGTTTTCAACAATACCATTGTGACTGTTACAGATGTTCCGGGTTCGAGTAGT  
TTCTTGGTCTCCGCCGACTTGTGGATTCAAAGGCACAAGAAGAGGGACGCCGTTTTCGGCTCAAACCGCAGCGGGAA  
ATGCTATTTCGTACAGTAGTAGATCAG---  
GGTATGCAACGAGCAGAAGTCATGATAAAAGGTCCTGGGCTCGGAAGAGACGCAGCATTACGAGCCATTTCGTAGAAGCGG  
CATATTATTAATTTTCGTACGTGACGTGACCCCTATGCCACATAATGGATGTAGACCTCCTAAAAAAGACGTGTG---  
ATGCCAACTATTAACAACCTATTAGAAACACAAGACAGCCAATCCGAAATGTCACAAAATCCCCGCTCTTCGAGGATG

TCCTCAGCGTCGAGGAACATGTACTAGGGTGTAT-----  
ACTATCACCCCCAAAAACCAAACCTCTGCCTTACGTAAAGTTGCCAGAGTACGATTAACCTCTGGATTTGAAATCACTGC  
TTATATACCTGGTATTGGCCATAATTTACAAGAACATTCTGTAGTCTTAGTAAGAGGTGGGAGGGTTAAGGATTTACCCG  
GTGTGAGATATCACATTGTTTCGAGGAACCCTAGATGCTGTCGGAGTAAAGGATCGTCAACAAGGGCGTTCT-----  
-----  
ATGGCAAGGAAAGGTTTGTATTGAGAGGGAGAAGAAGAGGAAGAAATTGGAACAGAAATATCATTTCGATTCGTGGATCCTC  
AAAAAAGAAATA--AGAAAAGTTCCATCGTTGAGT-----GACAAATGG-----  
GAAATTCATGGAAAATTGCAATCCCCACCACGTAATAGTGCACCTGTACGTCTTCATCGACGTTGTTTTTTGACCGGAAG  
ACCCAGAGCTAACTATAGGGATTTTGGGTTATCCGGACACGTACTTCGAGAAATGGTTCAGGCATGTTTGTGCGGGGCG  
CAACAAGATCAAGTTGG-----ATGGTCAA-----  
AATTCATTTATCTCG-----CTTATTCCG-----CAAGAAGAAAAAGAAGAA--AAC-----CGGGGA---  
TCTGTTGAATTTCAAGTATTACAGTTTCACCAATAAGATACGGAGACTTACTTCACACTTGGAAATTACACAGAAAAAGATTA  
TTTATCCCAGAGAGGTTTACGAAAAATTCTAGGAAAACGTCAACGGCTGCTGGCTTATTTGTCAAAGAAAAATAGAGTAC  
GTTATAATAAATTA-----ATTGGTCAGTTGGATATTCGGGAGCCAAAAACTCGT-----  
ATGGTAAAACCTTCGTTTAAAACGATGCGGTAGAAAGCAACGAGCCATTTATCGAATCGTTGCAATTGATGTTTCGATCCCG  
AAGAGAGGGAAGAGATCTTTGTAAAGTGGGTTTTTATGATCCGATAAAAAATCAAACCTATTTAAATGTTTCCTGTTATTC  
TAAATTTCTGGAAAAG-----GGGGCTCAACCTACAGAACTGTTTCATGATATTTTAAAGAAGGCAGAGGTATTT---  
AAGGAA-----CTTCAA-----GGA-----AATCAA---ACGAAATGA-----  
-----ATGGATAAA-----TCCAAGCAACTTTTTCGTAAATCCAAGCGATCTTTTCGT-----  
-----  
-----AGGCGTTTG---CCCCA---ATT---  
GGATCGGGGGATCGAATTGATTATAGAAACATGAGTTTAAATTAGTCGATTTATTAGTGAACAGGGAAAAATATTATCTAG  
ACGAGTGAATAGATTGACCTTGAAACAACAACGATTAATTAATGCTATAAAACAAGCCCGTATTTTTATCTTCGTTAC  
CTTTTCTT---AAT-----AACGAGAAA-----  
-----  
-----  
-----CAATTTGAAAGAACCGAGTCAATACCT-----AGACCTACC-----GGTCTAGAAGCAGA-  
-----AATAAA-----  
-----GTGACACGTTCA-----TTAAAAAA-----  
-----  
AATCCTTTTGTGGCCAATCATTATTGGA AAAAATTGAGAAGCTCAACATGAAAGAGGAGAAAAGAAATAATAGTAACTTG  
GTCCC GGCATCTACCATTATACCCACAATGATCGGTCATACAATTGCTATTGATAATGGAAGGAAACACTTACCCATTT  
ATATAACAGATCGTATGGTCGGTCACAAATTGGGAGAATTCGCACCTACTCTTACTTTT---CGG-----GGACAC---  
-----  
GCGAGAAACGATAATAAATCTCGTCGT-----  
-----  
ATGATTTTCAAATCATTTCTACTAGGTAATCTTGGATCCTTATACATAAAGATAATA-----  
AATTCAGTCGTTGTGGTC-----  
GGACTATATTATGGATTTTTGACAACATTCTCCATAGGGCCCTCTTATTTCTTCTTCTCCGAGCTCGGATTATG-----  
----GAAGAAGGA-----ACCGAGAGGGAGGTATCAGCAACAAC---  
GGTTTTATTACGGGACAGCTCATGATGTTTCATATCGATCTATTATGCGCCTCT  
*Amborella*  
GAGATGCGTTTTGGATAACATTCTTTTTCGATTGGGTATGGCTTCGACCATTCTGGAGCCAGACAATTAGTTAACCATAG  
ACATATTTTAGTTAATGGTCGTCTAGTAGATATACCAAGTTATCGCTGCAAACCCGGAGATTTTGTACTACGAGGGAGA  
AAGAAAGATCCAGAGCTCTGATTCAAATCATATGAATTCATCCCCAACGAG-----  
GAGTTGCCAAAACATTTGACTCTT-----TACTCGTTGCAG-----  
TATAAAGGATTAGTAAATCAAATAATAGATAGTAAATGGATCGGTTTGAAA---  
ATCAATGAATTGTTAGTCGTAGAATATTATTCCCGTCAGACT-----  
ATGTCACGTCGAGGTACTGCAGAAGAAAAACTGCAAAATCCGATCCAATTTATCGTAATCGATTAGTTAACATGTTGGT  
TAACCGTATTCTGAAACACGGA AAAAATCATTGGCTTATCAAATTATCTATCGAGCCTTGAAAAAGATTCAACAAAAGA  
CAGAAACAAATCCACTATCTGTTTTACGTCAAGCAATACGTGGAGTAACTCCCATATAGCAGTA-----  
AAAGCAAGACGT---  
GTAGGCGGATCGACTCATCAAGTTCCCATTTGAAATAGGATCTACACAAGGAAAAGCACTTGCCATTGTTGGTTATTAGG  
GGCATCCCGAAAACGTCCGGGTCGAAATATGGCTTTCAAATTAAGTTCCGAATTAGTGGATGCTGCCAAAGGGAACGGCG



ATGCC---ATACGCAAAAAGGAAGAGACTCATAGAATGGCAGAGGCCAATAGAGCTTTTGCACATTTTCGT-----  
---  
ATGGGTAGGGACACTATTGCCAATATAATAACTTGTATAAGAAATGCCGACATGGATAAAAAAAGAATGGTTCGAATAGC  
ATCTACCAATATA-----  
ACCGAAAACATTGTTAAAATAATTCTACAAGAAGGTTTTATTGAAAACGTTAGGAAACATCGGGAAAACAACAAA-----  
-AATTTCTGGTTTTAACCTTGCACAT-----AAAAGGAATAGGAAAGGG-----ACATATAGAAAG-----ACT-  
-----  
TTAAAACGTATAAGCAGATCCGGTCTACGAATCTATTCCAACATCAACGAATTCCTAGGATTTTCAGGTGGAATGGGGGT  
TGTAATTCCTTCTACTTCTCGAGGTATAATGACAGATCGAGAGGCTCGACGAGAAGGAATTGGAGGAGAGATTTTATGTT  
ATATATGG---ATGAAAAACCTATACCAAGAATTGGT---TCGCGT-----  
AGAAATGGACGTATTGGTTCACGTAAGAATGGACGTAGA---  
ATACCCAAAGGAGTTATTCATGTTCAAGCGAGTTTCAATAATACCATTGTGACTGTTACAGATGTACGAGGGCGGGTGGT  
TTCTTGGTGCTCCGCGGTACCTGTGGATTGAGAGGCACAAGAAGAGGAACACCGTTTGTCTCAAACCGCAGCAACAA  
ATGCTATTCGTACGGTAGTGGATCAG---  
GGTATGCAACGAGCAGAAGTTATGATAAAGGGACCTGGTCTCGGAAGAGATGCAGCATTACGAGCCATTTCGAGAAGTGG  
TGTACTATTAAGTTTCGTACGTGACGTAACCTCCCATGCCACATAATGGATGTAGACCCCTAAAAAAGACGCGTG---  
ATGCCAACTATTAACAACCTATTAGAAACACAAGACAGCCAATCAGAAATGTTACGAAATCTCCCGCTCTTCGAGGATG  
CCCTCAGCGTAGAGGAACATGTACTAGGGTGTAT-----  
ACTATCACCCCCAAAAACCAAACCTCTGCCTTACGTAAAGTTGCCAGAGTACGATTAACCTCTGGATTTGAAATCACTGC  
TTATATACCTGGTATTGGCCATAATTCACAAGAACATTCTGTAGTATTAGTAAGAGGAGGGAGGGTTAAGGATTTACCCG  
GTGTGAGATATCACATTGTTTCGAGGAACCTAGATGCTGTGCGAGTAAAGGATCGTCAACAAGGGCGTTCTAAATATGGG  
GTCAAAAAGCCAAA-----  
-----  
ATGGCAAGGAAAAGTCTGATTAGAGGGAGAGGAAGAGGCAGAAATTGGAACAGAAATATCATTGATTTCGTCGATCCTT  
AAAAAAGAAATA---AGCAAAACTCCATCGTTGAGT-----GACAAATGG-----  
AAAATTCATGGAAAATTGCAATCCCCACCACGTAATAGTGCACCTATACGTCTTCATCGACGTTGTTTTTCGACCCGGAAG  
ACCTAGAGCTAACTATCGAGACTTTGGGCTATCCGGACACGTACTCCGCGAGATGGTTCATGCATGTTTGTGCGGGGG  
CAACAAGATCGAGCTGG-----ATGGTCATA---  
AATTCGTTTTATATCA-----TCTATTTCA-----AAAGAAGAAAA-----AAGGGG---  
TCTGTTGAATTTCAAGTATTCTGTTTACCAGATAAGATACGGAAACTTACTTCACATTTGGAAGTGCACAAAAAGGACTT  
TTTATCCCAAAGAGGTATGCGTAAAATTCTGGGAAAACGTCAACGGATGCTGGCTTATTTGTCAAATAAAAAATAAAGTAC  
GTTATAAGAAATTA-----ATCGGTCAGTTGAATATTCGGGAGCCAAAGACTCGT-----  
ATGGTAAAACCTTCGTTTGAACGATGTGGTAGAAAGCAACGAGTCATTTATCGAATCGTTGCAATTGATGTTAGATCCCG  
AAGAGACGGAAGAGCTCTTCGAAAAGTGGGTTTTTACGATCCAATAAAGAATCAAACCTATTCAAACGTTTCTGCTATTC  
TATATTTCTTTGAAAA---GGAGCTCAGCCTACAGTAACTGTTTCATGATATTTCAAAGAAGGCGGAGGTATTT---  
AAATAA-----  
-----ATGGATAAA-----TCCAAGCAACCTTTTCGTAATCCAAGCGATCTTTTCGT-----  
-----  
-----AGGCGTTTG---CCCCA---ATT---  
GGATCGGGGGATCGAATTGATTATAGAAACATGAGTTAATTGGTCGATTTATTAGCGAACAAGGAAAAATATTATCCAG  
ACGAGTGAATAGATTGACCTTAAACAACAACGATTAATTAATGCTATAAAACAAGCTCGTATTTTATCTCCGTTAC  
CTTTTCTT---AAT-----AATGAGAAA-----  
-----  
-----CAATTTGAGAGAACCGAATCCCTCCCT-----AGAATTACT-----GGTACTAGAACCATA-  
-----AAGAAA-----  
-----ATGTCACGTTCA-----CTTAAAAA-----  
-----  
AATCCTTTTGTAGCTAATAATTTATTATTAATAAATTCATAAGCTTAAACGAGGGAGGAAAAAGAAATTATAGTAACTTG  
GTCCCGGGCATCTACCATTATACCCACTATGATTGGTCATACAATTGCTATTCATAATGGAAAAGAGCATTACCTGTTT  
ATGTAACAGATCGTATGGTAGGTCACAAATTGGGAGAATTTGCACCTACTCTTACTTTC---CAG-----GGACAT---  
-----  
GCGAGAAACGATAGTAAATTTTCGTCGT---  
ATGTCATTTCTAGATATTTCTATTTCTTTCTATATATGGAAAGTTAAGAAATCATCATATAATAATCGAGAAAGTGAAC  
AGAAAAAAGAAAGGGGTTTTCTGATGATTTTGAATCTTTTCTACTAGGTAATCTATTATCCTTATGCATGAAGATAA

GA-----AATTCGGTTCGTTGTGGTC-----  
GGACTCTATTATGGATTTATTACCACATTCTCTATAGGGCCCTCTTATCTCTTCTTCTCCGAGCTCGGGTTATG-----  
----GAAGAAGGA-----ACCGAGAAGGAGGTATCAGCAACAACACT---  
GGTTTTTATTATGGGACAGTTCATGATGCTCATATCGATCTATTATACGCCTCT  
Arabidopsis  
GAAATGCGTTTTGGATAACATCCTTTTTTCGATTGGGTATGGCTTTGACTATTCTCAAGCGCGCCAATTAGTTAATCATGG  
ACATATTTTAGTTAATGGTCGTATAGTTGATATACCAAGTTATCGCTGCAAACCCCGAGATATTATTACAGTGAAGGATG  
AACAAAACCTCTAGAACTTTGGTTCAAAATCTTCTTGATTCTGCCCCCTGAG-----  
GAATTGCCAAACCATCTGACTCTT-----CACACATTCCAA-----  
TATGAAGGGTTAGTCAATCAAATAATAGATAGGAAATGCGTTCGGTTTGAAA---  
ATAAATGAATTGCTTGTCTGTAGAATATTACTCTCGACAGACT-----  
ATGTCACGCCGAGGTACTGCAGAAGAAAAAACTGCAAATCCGATCCAATTTATCGTAATCGATTAGTTAACATGTTGGT  
TAACCGTATTCTGAAACACGGAAGAAAAAATCATTGGCTTATCAAATTATCTATCGAGCCTTGAAAAAGATTCAACAAAAGA  
CAGAAACAAATCCACTATCTGTTTTACGTCAAGCAATACGTGGAGTAACTCCCGATATAGCAGTA-----  
AAAGCAAGACGT---  
GTAGGCGGGTCAACTCATCAAGTTCCCATTGAAATAGGATCCACGCAAGGAAAAGCACTTGCCATTGCTTGGTTATTAGG  
GGCATCCCGAAAACGTCCGGGTCGAAATATGGCTTTCAAATTAAGTTCCGAATTAGTGGATGCTGCCAAAGGGAGTGGCG  
ATGCC---ATACGCAAAAAGGAAGAGACTCATAGAATGGCAGAGGCAAATAGAGCTTTTGCACATTTTCGT-----  
---  
ATGGGGAAAGACACCATTGCTGATATAATAACCTCTATACGAAATGCTGACATGAATAGAAAAGGAACGGTTCGGATAGG  
ATCGACTAACATC-----  
ACGGAAAGTATTGTTAAATCCTTTTACGAGAGGGTTTTATCGAAAACGTAAGGAAACATCGCGAAAACAACCAA-----  
-TATTTTTTGATTTTAAACCTAAGACAT-----AGACGAAATAAGAAAGAA-----TCCTACAAAACG-----ATT-  
-----  
TTAAATTTAAAGAGAATAAGTCGACCGGGTCTACGAATCTATTCTAACTCTCAACGAATTCACGAATTTTAGGCGGAAT  
AGGAATTGTAATCCTTTGACTTCTCAAGGTATAATGACAGACCGAGAAGCTCGACTAAAAAGAATCGGCGGAGAAATTT  
TGTGTTATATATGG---ATGGCAAACCTATATTAAGAATTGGT---TCGCGT-----  
AAAAATACACGTAGTGGTTCACGTAAAAATGTACGTAGA---  
ATACCAAAGGGAGTTATTCTGTTCAAGCAAGTTTCAACAATAACCATTGTAACCGTTACAGATGTACGGGGTTCGGGTGAT  
TTCTTGGTCTCCGACGACTTGTGGATTCCGGGGTACAAGAAGAGGAACACCCTTTGCTGCCCAAACCGCAGCAGGAA  
ATGCTATTTCGAGCAGTAGTGGATCAA---  
GGTATGCAACGAGCTGAAGTAAGGATAAAAAGGCCCTGGACTCGGAAGAGATGCGGCATTACGAGCTATTTCGTAGAAGCGG  
TATACTTTTTAAGTTTTCGTACGAGATGTAACCCCTATGCCACATAATGGTTGTAGACCCCTAAAAAAGACGTGTA---  
ATGCCAACCATTAACAACCTTATTAGAAATACAAGACAGCCAATCCGAAACGTACGAAATCCCCAGCGCTTCGGGGATG  
CCCTCAGCGACGAGGAACATGTACTCGGGTGTAT-----  
ACTATCACCCCCAAAAACCAAACCTCTGCTTTACGTAAAGTTGCCAGAGTACGATTAACCTCGGGATTTGAAATCACTGC  
TTATATACCTGGTATTGGCCATAATTTACAAGAACATTCTGTAGTCTTAGTAAGAGGGGGAAGGGTTAAGGATTTACCCG  
GTGTGAGATATCACATTGTTTCGAGGAACCCTAGATGCTGTCGGAGTAAAGGATCGTCAACAAGGGCGTTCTAAATATGGG  
GTCAAAAAGCCAAA-----  
-----  
ATGGCAAAGAAAAGTTTTGATTTATAGGGAGAAGAAGAGGCAAAAATTGGAAAAAAATATCATTGATTGTCGATCCTC  
AAAAAAGGAAATA---AGTAAGATTCCGTCGCTAAGT-----GAGAAATGG-----  
AAAATTCATGGAAAATTACAATCCCCACCGCCTAATAGTGCACCTACACGTCTTCATCGACGTTGCTTTTCGACCGGAAG  
ACCGAGAGCTAACTATCGAGACTTTGGACTATCTGGACACATCCTTCGGGAAATGGTTCAGGCATGTTTGTGTCAGGGG  
CAACAAGATCAAGCTGG-----ATGATAAAA---  
AATATAGTCATTTCA-----TTT-----GAAGAACAAAAAGAAGAA---AGC-----AGGGGA---  
TCCGTTGAATTTCAAGTATTTAGTTTCACTAATAAGATACGAAGACTTACTTCACATTTGGAATTGCACAGAAAAGATTA  
TTTATCTCAGCGGGGTCTACGAAAAATCTGGGAAAACGTCAACGACTGCTGGCTTATTTGTCAAAAAAATAGAGTAC  
GTTATAAAGAATTA-----ATTAATCAGTTGAATATTTCGGGAATTAAAAACCTCGT-----  
ATGGTAAAACCTTCGTTTAAACGATGTGGTAGAAAGCAACGAGCCGTTTATCGAATCCTTGCAATTGATGTTTCGATACCG  
AAGAGAAGGAAGAGATCTTAGTAAGGTGGGTTTTTATGATCCCATAACTAATCAAACCTTTTTTAAACCTTTCTGCTATTC  
TCGATTTTCTTAAAAA-----GGAGCTCAACCAACAAGAACAGCTCATGATATTTCAAAGAAGGCTGGGATTTTT---  
ACGGAA-----TGA-----  
-----ATGAATAAA-----TCTAAGCGACTTTTTACTAAATCCAAGCGATCTTTTCGT-----  
-----  
-----AGGCGTTTG---CCCCG---ATC---  
CAATCGGGGATCGAATTGATTATAGAAACATGAGTTAATTAGTCGATTTATTAGTGAACAAGGAAAAATATTATCTAG

ACGGGTGAATAGAGTGACTTTAAAACAACAACGATTAATCACTATTGCTATAAAAACAAGCTCGTATTTTATCTTTGTTAC  
CTTTTCTT---AAT-----AATCAGAAA-----

-----CAATTTGAAAGAAGTGAGTCGACTCCT-----AGAACTACT-----AGTCTTAGAACCAGA-----  
-----AAAAA-----GTGACACGTTCA-----CTAAAAAAA-----

AACCCTTTTGTAGCAAAGCATTATTAAGAAAAATAGAGAAGCTTAATACAAAGGCGGAAAAAGAAATCATAATAACTTG  
GTCCCGGCATCCACCATTATACCCACAATGATTGGCCATACGATCGCTATTATAATGGAAGGGAACACTTACCCGTTT  
ATATAATAGATCTTATGGTAGGACATAAATTAGGAGAATTTTACCTACTATAAATTTT---CGA-----GGACAT---

GCCAAAAATGATAATAGATCTCGTCGT-----

ATGGTTTTTCAATCTTTTATACTAGGTAATCTAGTATCCTTATGCATGAAGATAATA-----  
AATTCGGTCGTTGTGGTC-----  
GGACTCTATTATGGATTTCTGACCACATTTTCCATAGGGCCCTCTTATCTCTTCTTCTCCGAGCTCGGGTTATG-----  
----GACGAAGGAGAAGAAGGAACCGAGAAGAAAGTATCAGCAACAACA---  
GGTTTTATTGCGGGACAGCTCATGATGTTTATATCGATCTATTATGCGCCTCT

Atropa

GAAATGCGTTTTGGATAACATCCTTTTTCGATTGGGTATGGCTTCAACTATTCGCCGAGCCCGTCAATTAGTTAATCATCG  
ACATATTTTAGTTAATGGTCGTATAGTAGATATACCGAGTTATCGCTGCAAACCCGAGATATTATTACGGCAAAGGATG  
AACAAAAATCCAGAGCTCTGATTCAAATTTCTCTCGATTATCCCTCATGAG-----  
GAATTACCAAATCATTGACCCTT-----CACCCATTCCAA-----  
TATAAAGGATTAGTCAATCAAATAATAGATAGTAAATGGGTCGGTTTTGAAA---  
ATAAATGAATTGCTCGTCGTAGAAATATTATTCTCGTCAGACT-----  
ATGTCAGTCGAGGTACTGCAGAAAAAAAACAGCAAAATCCGATCCAATTTATCGTAATCGATTAGTTAATCATGTTGGT  
TAACCGTATTCTGAAACACGGAAAAAAATCATTGGCTTATCAAATTTATCTATCGAGCCGTGAAAAAGATTCAACAAAAGA  
CAGAAACAAATCCACTATCCGTTTTACGTCAGCAATACGTGGAGTAACTCCCGATATAACAGTA-----  
AAAGCAAGACGT---

GTAGGTGGATCGACTCATCAAGTTCCCATTGAAATAGGATCCACACAAGGAAAAGCACTTGCCATTGCTTGGTTATTAGC  
GGCATCCCGAAAACGTCCGGGTGCAAAATATGGCTTTCAAATTAAGTTCCGAATTAGTGGATGCTGCCAAAGGGAGTGGCG  
ATGCC---ATACGCAAAAAGGAAGAGACTCATAGAATGGCAGAGGCAAAATAGAGCTTTTGCACATTTTCGT-----  
---

ATGGGTAGGGACACTATTGCTGAGATAATAACTTCTATACGAAATGCCGATATGGATCGAAAAAGGGTGGTTTGAATAGC  
ATCTACTAATATT-----  
ACCGAAAATATTGTTCAAATACTTTTACGAGAGGGTTTTATCGAAAACGTGAGAAAACATCAAGAAAACAACAAA-----  
-TATTTTTTGGTTTTAACCCCTGCGACAT-----AGAAGGAATAAGAAAAGA-----CCCTATAGAAAT-----ATT-  
-----

TTAAATTTAAAACGAATCAGTCGACCTGGTCTACGAATCTATTCTAATTATCAACGAATTCCTCGAATTTTAGGTGGAAT  
GGGGATTGTAATTTCTTCTACTTCTCGAGGTATAATGACAGACCGAGAGGCTCGACTAGAAGGAATAGGTGGAGAAATTT  
TGTGTTATATCTGG---ATGGCAAAGCTATACCGAAAATTAGT---TCGCGT-----  
AGGAATGGACGTATTGGTTCACGTAAGGGTGCACGTAGA---

ATACCAAAGGGAGTTATTGATGTTCAAGCAAGTTTCAATAATACCATTGTCCTGTTACAGATGTACGGGGTCGAGTAGT  
TTCTTGGTCTCCGCTGGTACTTCTGGATTCAAAGGTACGAGAAGAGGAACACCGTTTGGCTGCTCAAACCGCAGCAGCAA  
ACGCTATCCGTACAGTAGTGGATCAA---

GGTATGCAACGAGCAGAAGTCATGATAAAAAGGTCGCGGTCTCGGAAGAGATGCAGCATTACGAGCTATTTCGTCGAAGTGG  
TATACTATTAACCTTTCGTACGGGATGTAACCTCTATGCCACATAATGGCTGTAGACCTCCGAAAAAAGACGTGTG---  
ATGCCAACTATTAACCACTTATTAGAAATACAAGACAGCCAATCAGAAATGTCACGAAATCCCCCGCTCTTCGGGGGTG  
CCCTCAGCGTCGAGGAACATGTACTAGGGTGTAT-----  
ACTATACCCCCAAAAAACCCTTCTGCCTTACGTAAAGTTGCCAGAGTACGATTAACCTCTGGATTTGAAATCACTGC  
TTATATACCCGGTATTGGCCATAATTTACAAGAACATTCTGTAGTCTTAGTAAGAGGGGGAAGGGTTAAGGATTTACCCG  
GTGTGAGATATCACATTGTTTCGAGGAACCCTAGATGCTGTCGGAGTAAAGGATCGTCAACAAGGGCGTTCTAAATATGG  
GTA AAAAAGCCAAA-----

ATGGCAAAGAAAAGTTTGGATTTCAGAGGGGAGAAGAAGAGGGCAAAAATTGGAACAGAAATATCATTTCGATTTCGTCGATCCTC  
AAAAAAGAAATA---AGCAAGGTTCCGTCGTTGAGT-----GACAAATGG-----  
GAAATTTATGGAAAGTTACAATCCCTACCACGGAATAGTGCACCTACACGCCTTCATCGACGTTGTTTTTTGACCGGAAG  
GCCGAGAGCTAACTATCGAGACTTTGGACTATCCGGACATATACTTCGTGAAATGGTTCATGCATGTTTGTGGCCAGGAG  
CAACAAGATCAAGTTGG-----ATGGTAAAA---  
AATTCTGTCATTTCA-----ATTATTTTT-----CAAGAAGAA-----AAG-----AGAGGA---  
TCTGTTGAATTTCAAGTATTCAATTTACCAATAAGATACGGGAGACTTACTTCACATTTAGAATTGCACAAAAAAGATTA  
TTTATCTCAGAGAGGTTTGAAGAAAATTTGGGAAAACGTCAACGGCTGCTAGCTTATTTGGCAAAAAAATAGAGTAC  
GTTATAAAGAATTA-----ATTAATCAGTTGGACATTTCGAGAGACAAAAACTCGT-----  
ATGGTAAAACCTTCGTTTGAACGATGTGGTAGAAAGCAACGAGCCGCTCTATCGAATCGTTGCAATTGATGTTTCGATCCCG  
AAGAGAAGGAAAAGATCTTCGTAAGTGGGTTTTTATGATCCGATAAAGAATCAAACCTTATTTAAATGTTCTCTGCTATTT  
TATATTTCCCTTGAAAA-----GGGGCTCAACCTACAGGAAGTGTTCAGGATATTTTAAAGAAGGCGGAGGTTTTT---  
AAGGAA-----CTTCGT-----CCT-----AATCAA---CCTAAATTCAATTAA-----  
-----ATGGATAAA-----TCCAAGCGACCTTTTCTTAAATTCAAGCGATCTTTTCGT-----  
-----AGGCGTTTG---CCCCG---ATT---  
CAATCGGGGGATCGAATTGATTATAGAAACATGAGTTTAATTAGTCGATTTATTAGTGAACAAGGAAAAATATTATCAAG  
ACGAGTGAATAGATTGACCTTGAAACAACAACGATTAATTACTCTTGCTATAAAACAAGCTCGTATTTTATCTTTGTTAC  
CTTTTCTC---AAT-----AATGAGAAA-----  
-----  
-----CAATTTGAAAGAACCGAGTCGACCGCT-----AGAACTACT-----GGTTTTAAAGCCCGA-  
-----AATAAA-----GTGACACGTTCA-----CTAAAAAA-----  
-----  
AATCCCTTTGTAGCCAATCATTATTTAAAAAATTTGATAAGCTTAACACAAAAGCAGAAAAAGAAATAATAGTAACTTG  
GTCCCGGCATCTACCATTATACCCACAATGATCGGTCATACTATTGCTATCCATAATGGAAAAGAGCATTGTCCTATTT  
ATATAACGGATAGTATGGTAGGCCACAAATTGGGAGAATTTGCACCTACATTAATTTT---AGA-----GGACAT---  
-----  
GCAAAAAGCGATAATAGATCTCGTCGT-----  
-----  
ATGATTTTTCAATCTTTTCTACTAGGTAATCTAGTATCCTTATGCATGAAGATAATC-----  
AATTCGGTCGTTGTGGTC-----  
GGACTCTATTATGGATTTCTGACCACATTCTCCATAGGGCCCTCTTATCTCTTCTTCTCCGAGCTCTGGTTATG-----  
----GAAGAAGGA-----ACCGAGAAGAAGGTATCAGCAACAGCT---  
GGTTTTATTACGGGACAGCTCATGATGTTTCATATCGATCTATTATGCGCCTCT  
Buxus  
GAAATGCGTTTTGGATAACATCCTTTTTCGATTGGGTATGGCTTCGACCATTCTGGGGCCCGGCAATTAGTCAACCATAG  
ACATATTTTAGTTAATGGTCGGATAGTAGATATCCCAAGTTATCGCTGCAAACCCCGAGATATTATTACGGCGAAGGATG  
AACAAAAGTCCAGAGCTCTAATTCAAAATTATCTTGATTTCATCCCCCATGAG-----  
GAATTGCCAAAACATCTAACCTT-----CACTCATTCCAA-----  
TACAAAGGATTAGTCAATCAAATAATAGATAGTAAATGGGTTCGTTTTGAAA---  
ATAAATGAATTGCTAGTCGTAGAATATTATTCCTGTCAGACT-----  
ATGTCACGTCGAGGTACTGCAGAAGAAAAAATGCAAAATCCGATCCAATTTATCGTAATCGATTAGTTAACATGTTGGT  
TAACCGTATTTCTGAAACACGGAAAAAATCATTGGCTTATCAAATTAAGTTCCGAATTAGTGGATGCTGCCAAAGGGAGTGGCG  
CAGAAACAAATCCACTATCTGTTTTACGTCAAGCAATACGTGGAGTAACTCCCGATATAGCAGTA-----  
AAAGCAAGACGT---  
GTAGGTGGATCGACTCATCAAGTTCCCATTGAAATAGGATCTACACAAGGAAAAGCACTTGCCATTGTTGGTTATTAGG  
GGCATCCCGAAAACGTCCGGGTGCAAAATAGGCTTTCAAATTAAGTTCCGAATTAGTGGATGCTGCCAAAGGGAGTGGCG  
ATGCC---ATACGCAAAAAGGAAGAGACTCATAGAATGGCAGAGGCAAAATAGAGCTTTTGCACATTTTCGT-----  
---  
ATGGGTAGGGACACTATTGCAAACATAATAACTTCTATACGAAATGCTGACATGGATAAAAAAGGAACAGTTTCGAATAGC  
ATCCACTAATATC-----  
ACCGAAAACATTGTTAAATACTTCTAAGAGAGGGTTTTATCGAAAACGTGAGGAAACATCGGGAAAGCAACAAA-----  
-TATTTCTTGGTTTCAACCTTGCACAT-----AGAAGGAGTAGGAAAGGA-----CCATATAGAAT-----ATT-

-----  
TAAAAACGTATCAGCCGACCCGGTTTACGAATCTATTCCAACATCAACGAATTCCTAGGATTTTAGGTGGAATGGGAAT  
TGTAATTTCTTTCTACTTCTCGAGGTATAATGACAGACCGAGAGGCTCGACTAGAAGGAATCGGAGGAGAAATTTTGTGTT  
ATATATGG---ATGGCAAACCTATACCAAGAATTGGT---TCACGT-----  
AAGAATGGGCGTATCGGTTACGTAAGAGTGGACGTAGA---  
ATACCAAAGGGGGTTATTCATGTTCAAGCAAGTTTTCAACAATACCATTGTGACTGTTACAGATGTACGGGGCAGGGTGGT  
TTCTTGGTCTCCGCCGGCACTTGTGGATTACAGGGGAACAAGAAGAGGGACACCTTTTGCTGCTCAAACCGCAGCGGGAA  
ATGCTATTTCGTACAGTAATGGATCAG---  
GGTATGCAACGAGCAGAAGTCATGATAAAGGGTCTGGTCTCGGAAGAGATGCAGCATTACGAGCTATTTCGTAGAAGTGG  
TCTACTATTAAGTTTCGTACGGGACGTAACCCCTATGCCACATAATGGATGTAGACCTCCTAAAAAAGACGTGTG---  
ATGCCAACTATTAACAACCTATTAGAAAACAAGACAGCCAATCAGAAATGTCACGAAATCCCCCGCTCTTCGGGGATG  
TCCTCAGCGTCGAGGAACATGTACTAGGGTGTAT-----  
ACTATCACCCCCAAAAAACCAAACCTCTGCCTTACGTAAAGTTGCCAGAGTACGATTAACCTCTGGATTTGAAATCACTGC  
TTATATACCTGGTATTGGCCATAATTACAAGAACATTCTGTAGTCTTAGTAAGAGGAGGAAGGGTTAAGGATTTACCCG  
GTGTGAGATATCACATTGTTTCGAGGAACCCTAGATGCTGTGCGAGTAAAGGATCGTCAACAAGGGCGTTCTAAATATGGG  
GTCAAAAAGCCAAA-----  
-----

ATGGCAAGAAAAAGTTTTGATTAGAGGGAAAAGAAGAGGAAAAAATTGGAACAGAAATATCATTGATTTCGTGATCCTC  
AAAAAAGAAATA---AGCAAAGTTCGGTCGTTGAGT-----GACAAATGG-----  
GAAATTCATGGAAAATTACAATCCCCACCGCGTAATAGTGCACCTACACGTCTTCATCGACGTTGTTTTTCGACAGGAAG  
ACCGAGAGCTAACTATCGAGACTTTGGGTTATCCGGACACATACTTCGTGAAATGGTTCATGCATGTTTGTGCGGGGG  
CAACAAGATCAAGTTGG-----ATGGTAAAA---  
AATTCATTATCTCA-----GTTATTTTCG-----CAAGAAAAAAGAAGAA---AAC-----AAGGGG---  
TCGGTTGAATTTCAAGTATTTAATTTCAACAATAAGATACGGATACTTACTTACATTTGGAATTACACAGAAAAGACTA  
TTCATCTCAGAGAGGTCTACGGAAAATTCTGGGAAAACGCCAACGGCTGCTGTCTTATTTGTCAAAGAAAAATAGAGTAC  
GTTATAAGGAATTA-----ATTGGTCAGTTGGGTATTCTGGAACAAAAAGCTCGT-----  
-----  
-----  
-----

-----ATGGATAAA-----TCCAAGCGACCTTTTTCTTAAATCCAAGCGATCTTTTCGT-----  
-----  
-----AGGCGTTTG---CCCCA---ATT---  
GGATCGGGGGATCGAATTGATTATAGAAACATGAGTTTAATTAGTCGATTTATTAGTGAACAGGGAAAAATTTTATCTAG  
ACGAGTAAATAGATTGACCTTGAAACAACAACGATTAATTACTATTGCTATAAAACAAGCTCGTATTTTATCTTCGTTAC  
CTTTTCTT---AAT-----AATGAGAAA-----  
-----  
-----  
-----

-----CAATTCGAGAGAACCGAGTTTACTGCT-----AGAACTACG-----  
GGTTCTAGAATAAATAAATAA-----GTGGCACGTTCA-----CTAAAAAA-----  
-----  
-----

AATCCTTTTGTAGCTAATCATTATTAGAAAAAATTGAGAAGCTTAACATGAGGGCGAAAAAAGAAATAATAGTAACTTG  
GTCCCGGGCATCTACCATTATACCCACAATGATCGGCCATAACAATTGCTATTTCATAATGGAAAGGAACATTTGCCTATTT  
TTATAACAGATCGTATGGTAGGTCACAAGTTGGGAGAATTTGCGCCTACTCTTAATTTTC---CGG-----GAACAC---  
-----  
GCGAGAAACGATAAATAAATCTCGTCGT-----  
-----  
-----

-----  
Calycanthus  
GAGATGCGTTTTGGATAACATCCTTTTTTCGACTGGGTATGGCTTCGACCATTCTGGAGCCAGGCAATTAGTTAACCATAG  
ACATATTTTAGTTAATGGTCGTATAGTAGATATCCAAGTTATCGCTGCAAACCCCGAGATATTACTACGAGGGATG

AACAAAGATCCAGAGCTCTGATTCAAATTATCTTGATTACCCTCCCACGAG-----  
GAATTGCCAAAACATTTGACTTTT-----CACCCATCCCAA-----  
TATAAAGGATTGGTAAATCAAATAATAGATAGTAAGTGGGTCGGTTTAAAA---  
ATCAATGAGTTGCTAGTCGTAGAATATTATTCCCGTCAGACT-----  
ATGTCACGTCGAGGTACTGCAGAAGAAAAAAGTGCAAAATCCGATCCAATTTATCGTAATCGATTAGTTAACATGTTGGT  
TAACCGTATTCTGAAACACGGAAAAAATCATTGGCTTATCAAATTGTCTATCAAGCCGTGAAAAAGATTCAACAAAAGA  
CAGAAACAAATCCACTATCTGTTTTACGTCAAGCAATATGTAGAGTAACTCCCGATATAGCAGTA-----  
AAAGCAAGACGT---  
GTAGGTGGATCGACTCATCAAGTTCCTATTGAAATAGGATCTACACAAGGAAAAGCACTTGCCATTGCTTGGTTATTAGG  
GGCATCCCGAAAACGTCCGGGTCGAAATATGGCTTTCAAATTAAGTTCGGAATTAGTGGATGCTGCCAAAGGGAGTGGCG  
ATGCC---ATACGCAAAAAGGAAGAGACTCATAGAATGGCAGAGGCAAATAGAGCTTTTGCACATTTTCGT-----  
---  
ATGGGTAGGGACACTATTGCCGATATACTAACTTCTATAAGAAATGCTAACATGGATAAAAAAGGAACAGTTCGAATAGC  
ATCTACTAATATA-----  
ACCGAAAACATTGTTAAATACTTCTAAGGGAAGGGTTTATTGAAAATGTTAGGAAACATCAGGAAAAACAACAAA-----  
-TATTTCTTGGTTTCAACCCTGCAACAT-----AGAAGGAATAGGAAAGGA-----AGATATAGAACT-----ATT-  
-----  
TTAAAGCGTATCAGTCGACCTGGTCTACGAATCTATTCCAATTATCAACGAATTCCTAGGATTTTAGGTGGAATGGGGAT  
CGTAATTTCTTTCTACTTCTCAGGGTATAATGACAGATCGAGAAGCTCGACTAGAAGGAATTGGAGGAGAAATTTTGTGTT  
ATATATGG---ATGACAAAATCTATACCAAGAATTGGT---TCACGG-----  
AGGGGTGGGCGTATTGCTTACGTAAGAATGCACGTAGA---  
ATACCAAAAGGAGTTATTCATGTTCAAGCGAGTTTCAACAATACCATTGTGACTGTTACAGATGTAACAGGTCCGGTGGT  
TTCTTGGTCCCTCCGCAGGTAATTGTGGATTTCAGGGGCACAAGAAGAGGGACACCATTTGCTGCTCAAACCGCAGCAGCAA  
ACGCTATTTCGTACAGTAATCGATCAG---  
GGTATGCAACGAGCAGAAGTCATGATAAAGGGCCCCGGGCTCGGAAGAGATGCAGCATTACGAGCCATTCGTAGAAGTGG  
TATACTGTAAAGTTTCGTACGTGACGTAACCCCTATGCCACATAATGGATGTAGGCCTCCTAAAAAAGACGTGTG---  
ATGCCAACTATTAACAACCTTATTAGAAACACAAGACAGCCAATCCGAAATGTCACGAAATCCCCTGCTCTTCGAGGATG  
TCCTCAGCTCGAGGAACATGTAAGGTTGAT-----  
ACTATCACCCCCAAAAAACCAACTCTGCCTTACGTAAAGTTGCCAGAGTACGATTAACCTCTGGATTTGAAATCACTGC  
TTATATACCTGGTATTGGCCATAATTCACAAGAACATTCTGTAGTCTTAGTAAGAGGAGGAAGGGTTAAGGATTTACCCG  
GTGTGAGATATCACATTGTTTCGAGGAACCCCTAGATGCTGTTCGGAGTAAAGGATCGTCAACAAGGGCGTTCTAAATATGGG  
GTCAAAAAGCCAAA-----  
-----  
ATGGCAAGGAAAGGTTTGGATTGAGAGGGAGAGAAAGAGGCCAAAAATTGGAACAGAAATATCATTGATTGTCGATCCCC  
GAAAAAAGAAATA---GGCAAAGTTTCATCGTTGAGT-----GACAAGTGG-----  
AAAATTCATGGAAAATTGCAATCCCCACCACGTAATAGTGCCCCTACACGTCTTCATCGACGTTGCTTTTTGACCGGAAG  
ACCTAGAGCTAACTATCGAGACTTTGGACTATCCGGACACATACTTCGAGAAAAGGTTTCATGCATGTTTGTTCGCGGGG  
CAACAAGATCAAGTTGG-----ATGGTCAA---  
AATTCATTATCTCG-----GTTATTCCG-----CAAGAAGAAAA-----AAC-----AAAGGA---  
TCTGTTGAATTTCAAGTATTCAGTTTACCAATAAGATACGGAAACTTACTTCACATTTGGAATTGCACAGAAAAGACTA  
TTCATCTCAGATAGGCCTGCGGAGAATTCTGGGAAAACGTCAACGGCTGCTGGCTTATTTGTCAAAGAAAAATAGAGTAC  
GTTATAAAGAATTA-----ATCGATCAGTTAGGTATTCGGGAGCCAAAAACTCGT-----  
ATGGTAAAACCTTCGTTTGAACGATGTGGTAGAAAGCAACGAGCCATCTATCGAATCGTTGCAATTGATGTTCCGATCCCG  
AAGAGAAGGAAGAGATCTTCGTAAAGTGGGTTTTTATGATCCGATAAATAACCAAACCTTATTTAAATGTTTCTCTTATTC  
TATATTTCTTTGAAAAG-----GGCGCTCAACCTACAGGAAGTGTATGATATTTAAAGAAGGCAGAGGTATTT---  
AAAGAA-----CTTCAA-----ATT-----AATCAA---AAGAAATCAAATTA-----  
-----ATGGATAAA-----TCCAAGCGACCTTTTCGTAATCCAAGAGATCTTTTCGT-----  
-----  
-----AGCGTTTTG---CCCCA---ATT---  
GGATCGGGGGATCGAATTGATTATAGAAACATGAGTTAATTAGTCAATTTATTAGTGAACAAGGAAAAATATTATCTAG  
ACGAGTGAATAGATTGACCTTGAACAACAACGATTAATTAATGCTATAAAACAAGCTCGTATTTTATCTTCTGTTAC  
CCTTTCTT---AAT-----AATGAGAAA-----  
-----  
-----CAGTTTGAAGAACCGAATCGATCCCT-----AGAACTACC-----GGTCTAGAACCAGA-

-----AAA-----  
-----GTGACACGTTCA-----CTAAAAAA-----  
-----

AATCCTTTTGTAGCTAATCATTATTGGCAAAAATTGAGAAGCTCAACATGAGAGAGGAAAAAGAGACAATAGTAACTTG  
GTCCCGGGCATCTACCATTATACCCACAATGATCGGCCATACAATCGCTATTTCATAATGGAAAGGAACATTTACCTATTT  
TTATAACAGATCGCATGGTGGGTCAAAAATTGGGAGAATTTCGCACCTACTCTTACTTTTCCG-----GGACAC-----

-----CGG-----GGACAC-----  
-----  
-----CGGAGAACCGATACTAGATCTCGCCGT-----  
-----

ATGATTTTGAATCTTTTCTACTAGGTAATCTATTATCCTTATGCATGAAGATAATA-----  
AATTCGGTTCGTTGTGGTC-----  
GGACTCTATTATGGATTTCTGACCACATTCTCCATAGGGCCCTCTTATCTTTTCTTCTCCGAGCTCGGGTTATG-----  
-----GAAGAAGGA-----ACCGAGAAGGAGGTATCAGCAACAACACT-----  
GGTTTTATTACAGGACAGCTCATGATCTTCATATCGATCTATTATGCGCCTCT

Ceratophyllum

GAGATGCGTTTGGATAATATTCTTTTTCGATTGGGTATGGCTTCGACCATTCTGGAGCTAGGCAATTAGTTAACCATAG  
ACATATTTTAGTTAATGGTCGTATAGTGGATATACCAAGTTATCGTTGCAAACCTCAAGATATTATTACTACGAGGGATG  
AACAAAGATCCAGAGCTCTGATTCAAAAGTCTATTGATTCATCCCCTCATGAG-----  
GAAGTACCAAACATTTGACTCTT-----TACCCATTCCAA-----  
TATAAAGCATTAGTAAATAAAATAATAGATAGTCAATGGATAGGTTTGAAA---  
ATCAATGAGTTGCTAGTTGTAGAATATTATTCTCGCCAGACTTGA-----  
ATGTCACGTCGAGGTACTGCAGAAGAAAAAAGTGCAAAATCCGATCCAATTTATCGTAATCGATTAGTTAACATGTTGGT  
TAACCGTATTCTGAAACACGGAAAAAATCATTGGCTTATCAAATTATCTATCGAGCCGTGAAAAAGATTCAACAAAAGA  
CAGAAACAAATCCACTATCTGTTTTACGTCAAGCAATACGTGGAGTAACTCCCATATAGCAGTA-----  
AAATCAAGACGT---

GTAGGCGGATCGACTCATCAAGTTCCCGTTGAAATAGGATCTACACAAGGAAAAGCACTTGCCATTGCTTGGTTATTAGG  
GGCATCCCGAAAACGTCCGGGTGAAATATGGCTTTCAAATTAAGTTCCGAATTAGTGGATGCTGCCAAAGGGAGTGGCG  
ATGCC---ATACGCAAAAAGGAAGAGACTCATAGAATGGCAGAGGCAAATAGAGCTTTTGCACATTTTTCGTTAA-----  
-----

ATGGGTAGGGACACTATTTCAAATATACTAACTTCGATAAGAAATGCTGACATGAATAAAAAGGAAACGGTTCGAATACC  
ATCTACTAATATC-----  
ATCGAAAGTATTGTTAGAATACTTCTACGAGAAGGTTTTATTGAAAACGTTAGAAAACATCAGGAAAACAACAAA-----  
-AATTTCTTGGTTTTCAACCCTGCGACAT-----AGAAGAAATAGGACGGGA-----ACATATAGAAAT-----ATT-  
-----

TTAAAGCGTATCAGCCGACCCGGTCTACGAATTTATTCCAACCTCCCAAAGAATTCCTAGGATTTTAGGTGGAATGGGGAT  
TGTTATTCTTTCTACTTCTCGAGGTATAATGACTGATCGAGAGGCTCGACTCGAAGGAATTGGAGGAGAAATTTTGTGTT  
CTATATGGTGAATGACAAAAGCTATACAAAAAATTGGT---TCACGT-----

AGAAATGGACGTATTGCATCACGTAAGAATGGACGTAGA---  
ATACCAAAGGAGTTATTACGTTCAAGCAAGTTTCAACAATACCATTGTGACTGTTACCGATGTACGGGGTCAAGTGGT  
TTCTTGGTCTTCCGCCGGTACTTGTGGATTTCAGAGGCACAAGAAGAGGGACACCTTTTGTGCTCAAACCGCAGCAGCGA  
ATGCTATTTCGCACAGTAGTCGACCAG---

GGGATGCAACGAGCAGAAGTCATGATAAAAGGACCTGGTCTAGGAAGAGATGCAGCATTAAAGAGCCATTCGTAGAAGTGG  
TATACTATTAAGTTTCGTACGTGATGTAACCCCTATGCCACATAATGGATGTAGACCCCTAAAAAAGACGTGTGTAGA  
TGCCAACTATTAACAACCTTATTAGAAACACAAGACAGCCAATCAGAAATGTCACGAAATCCCCCGCTCTTCGAGGATGC  
CCTCAGCGTCGAGGAACATGTACTAGGGTGTAT-----

ACTATCACCCCAAAAAACCAAACCTCCGCCTTACGTAAAGTTGCCAGAGTACGATTAACCTCTGGATTTGAAATCACTGC  
TTATATACCTGGTATTGGCCATAATTCACAAGAACATTCTGTAGTATTAGTAAGAGGAGGAAGGGTTAAGGATTTACCTG  
GTGTGAGATATCACATTGTTTCGAGGAACCCTAGATGCTGTGCGAGTAAAGGATCGTCAACAAGGGCGTTCTAAATATGGG  
GTCAAAAAGCCAAAAAATAAAGTGA-----  
-----

ATGGCAAGGAAAAGTTTGATTTCAGAGAGAGAGAAAAGAGACAGAAATTTGGAACAGAAATATCATTGATTTCGTGATCCTC  
AAAAAAGAAATA---AGTGAAGTTCATCGTTGAGT-----GACAAATGG-----

GAAATTCATGGAAAATTGCAATCCCCACCACGGAATAGTGCACCTACACGTCTTCATCGACGTTGTTTTTCGACGGGAAG  
ACCGAGAGCTAACTATCGAGACTTTGGGCTATCCGGACACATACTTCGCGAAATGTTAATGCATGTTTGTGCGGGGG  
CAACAAGATCTAGTTGGTAA-----ATGATAAAA-----

AATTCATTCATCTCA-----GTTATTCCG-----CAAGAAGACAAAAAAGG---AAA-----  
AGGGGGGGGTCCGTTGAATTTCAAGTATTCAATTTTACCAATAAGATACGGATACTTACTTCACATTTAGAATTGCACAG

AAAAGACTATTCATCTCAGAGAGGTTTGCCTAAAATTCTGGGAAAACGTCAACGACTGCTAGCGTATTTGTCAAAGAAAA  
ATAGAGTACGTTATAAGGAATTA-----ATTGGTCAGTTGGATATTCGGGAGCCAAAAACTCGTTAA-----  
ATGTTAAACTTCGTTTGAACGATGTGGTAGAAAGCAACGAGCCATCTATCGAATTGTTGCAATTGATGTTCCGATCAGC  
AAGAGAAGGAAGAGATCTTCGGAAAAGTGGGTTTTTACGATCCGATAAAGAATCAAACCTATTTAAATGTTCCCGCTATTT  
TGCATTTTCTTGAAACG-----GGCGCTCAACCTACAGAAACAGTTCATGATATTTTAAAGAAAGCGGGGGTATTT---  
GAGGAA-----CTTCGA-----GTT-----AGTAAA---ACGAAATGA-----  
-----ATGGATAAA-----TCCAAGCGACCCTTTCGTAAATCCAAGCGATCTTTTCGT-----  
-----AGGCGTTTG---CCCCA---ATT---  
GGATCGGGGGATCGAATTGATTATAGAAACATGAGTTTAATTAGTCGATTTATTAGTGAACAAGGAAAAATATTATCTAG  
ACGAGTGAATAGATTGACTTTGAAACAACAACGCTTAATTACTATTGCTATAAAACAAGCTCGTATTTTATCTTCATTAC  
CTTTTCTG---AAT-----AATGAGAAA-----  
-----  
-----CAATTTGAAAGAAGTGAAGTCAATCCCT-----CGAGCAACT-----GGTCCTAGAACCAGA-  
-----AATAAATAG-----  
-----ATGGCACGTTCA-----CTAAAAAAA-----  
-----  
AATCCCTTTGTAGCTTTTCATTTATTGGAAAAAGTGGAAAAGCTCAACATAAGGAAAGAAAAAGAGATAATAGTAACTTG  
GTCCAGAGCATCTACCATTATCCCCACAATGGTGGGCCATACTATTGCTGTTTATAATGGGAAAGAGCATTACCTGTTT  
TTATAACAGATCGTATGGTGGGTCACAAATTGGGAGAATTTCGCACCTACTCTAACTTTC---CGA-----GGCCAT---  
-----  
GCGAGAAATGATAATCGATCTCGTCGTAA-----  
-----  
ATGATTTTGAATCTTTTATACTAGGTAATCTAGTATCCTTATGCATGAAGATAATC-----  
AATTCGGCCGTTGTGGTC-----  
GGACTCTATTATGGATTTCTGACCACATTCTCCATAGGGCCCTCTTATCTCTTCTTCTCCGAGCTCGGGTTATG-----  
----GAAGAAGGA-----ACCGAAAAGGAGGTATCAGCAACAACA---  
GGTTTTATTACGGGACAGCTCATGATGTTTATATCGATCTATTATGTACCTCT  
Chloranthus  
GAGATGCGTTTGGATAACACCCTTTTTTCGATTGGGTATGGCTTCGACCATTCTGGAGCCAGGCAATTAGTTAACCATAG  
ACATATTTTAGTTAATAGTCGTATAGTAGATATACCAAGTTATCGCTGCAAACCCCGAGATATTACTACTACGAGGGATG  
AACAAAGATCCAGAAGTCTGATTCAAATCATATTGATTTCATCCCCCAGAG-----  
GAATTGCCAAAACATTTGACTCTT-----CACTCATTCCAA-----  
TATAAAGGATTAGTAAATCAAATAATAGATAGTAAATCTATTGGTTTTGAAA---  
ATCAATGAGTTGCTAGTCGTAGAATATTATTCCCGTCAGACT-----  
ATGTCACGTCGAGGTACTGCAGAAGAAAAAACTACAAAATCCGATCCAATTTATCGTAATCGATTAGTTAACATGTTGGT  
TAACCGTATTCTGAAACACGGAAAAAAATCATTGGCTTATCAAATTATCTATCGAGCCGTGAAAAAGATTCAACAAAAGA  
CAGAAACAAATCCACTATCTGTTTTACGTCAAGCAATGCGTGGAGTAACTCCCGATATAGCAGTA-----  
AAAGCAAGACGT---  
GTAGGCGGATCGACTCATCAAGTTCCCCTTGAATAGGATCTACACAAGGAAAAGCACTTGCCATTGCTTGGTTATTAGG  
GGCATCCCGAAAACGTCCGGGTGCAAAATATGGCTTTCAAATTAAGTTCCGAATTAGTGGATGCTGCCAAAGGGAGTGGCG  
ATGCC---ATACGCAAAAAGGAAGAGACTCATAGAATGGCAGAGGCAAAATAGAGCTTTTGCACATTTTCGT-----  
---  
ATGGGTAAGGACACTATTGCCGATATAATAAATTCTATAAGAAATGCTGACATGGAAAAAAGGAACAGTTAGAATAGC  
ATCTACTAATATTAATATAAGTGAACACATTGTTCAAATACTTCTACGAGAAGGTTTTATTGAAAACGTTAGGAAACATC  
GGGAAAACAACAAA-----TATTTCTTGGTTTTCAACCCTGCGGCAT-----AGAAGGAATAGGAAAGGA-----  
GCATATAGAAAT-----ATT-----  
TTAAAGCGTATCAGCCGACCCGGTCTACGAATCTATTGAACTATCAACGAATTCCTAGGATTTTAGGTGGAATGGGAAT  
TGTAATTCTTTCTACTTCTCGAGGTATAATGACAGATCGAGAGGCTCGACTAGAAGGAATTGGAGGAGAAATTTTGTGTT  
ATATATGG---ATGACAAAACCTATACCAAGAATTGGT---TCACGC-----  
AAGAATGGACGTATTAGTTCACGTAAGAATGGACGTAGA---  
ATACCAAAGGGAGTTATTCATGTTCAAGCGAGTTTTCAACAATACCATTGTGACTGTTACAGATGTACGGGGTGGGTGGT  
TTCTTGGTCTCCGCTGGTACTTCCGGATTTAGAGGAACAAGAAGAGGAACCCATTTGCTGCTCAAACCGCAGCAGGAA  
ATGCTATTCGTACAGTAGTGGATCAA---



GGTATGCAGCGAGCAGAAGTCATGATAAAGGGACCCGGTCTCGGAAGAGATGCAGCATTACGAGCCATTTCGTAGAAGTGG  
TCTACTATTAAGTTTTCTGACGTGACGTAACCCCTATGCCACATAATGGATGTAGACCTCCTAAAAAAGACGTGTG---  
ATGCCAACTATTAAGCAACTTATTAGAAATACAAGACAGCCAATCAGAAATGTCACGAAATCCCCCGCTCTTCGAGGATG  
TCCTCAGCGCCGAGGAACGTGTACTAGGGTGTAT-----  
ACTATCACCCCCAAAAACCAAACCTCTGCCTTACGTAAAGTTGCCAGAGTACGATTAACCTCTGGATTTGAAATCACTGC  
TTATATACCTGGTATTGGCCATAATTCACAAGAACATTCTGTAGTCTTAGTAAGAGGAGGAAGGGTTAAGGATTTACCCG  
GTGTGAGATATCACATTGTTTCGAGGAACCCTAGATGCTGTGCGGAGTAAAGGATCGTCAACAAGGGCGTTCT-----  
-----AGTGC GTT-----

ATGGCAAGGAAAAGTTTGATTTCAGAGGGGAGAGGAAGAGGAAGAAAATTGGAACAGAAAATATCATTGGATTTCGTGCATCCTC  
AAAAACAGAAAATA---AACAAAGTTCCATCGTTGAGT-----GACAAATGG-----  
GAAATTCATGGAAAATTGCAATCCCCACCACGTAATAGTGCACCTATACGTCTTCATCGACGTTGTTTTTCGACCGGAAG  
ACCTAGAGCTAACTATAGAGACTTTGGGCTATCCGGACACATACTTCGCGAAAATGGTTCATGCATGTTTGTTCGCGGGG  
CAACAAGATCGAGTTGG-----ATGGTAAAA---  
AATTCATTCAACTCA-----GTTATTCCG-----CAAGAAGAA-----AAC-----AAGGGA---  
TCTGTTGAATTTCAAGTATTCAATTTACCAATAAGATACGGAGACTTACTTCACATTTGGAATTACACAGAAAAGACTA  
TTTATCTCAAAGAGGCCTGCGGGGAATTCTGGGAAAACGTCAACGACTGCTGGCTTATTTGTCAAAAAAAAAATAGAGTAC  
GTTATCAGGAATTA-----ATTGGTCAGTTGGATATTCGGGAGCCAAAAACTCGTGAATTT-----

-----ATGGATAAA-----TCTAAGCGACCTTTTCGTAAATCCAAGCGATCTTTTCGT-----

-----AAGCGTTTG---CCCCCA---ATT---  
GGATCGGGGGATCGAATTGATTATAGAAACATGAGTTTAATTAGTCGATTTATTAGTGAACAAGGAAAAATATTATCTAG  
ACGAGTAAATAGATTGACCTTGAAACAACAACGATTAATTACTACTGCTATAAAACAAGCTCGTATTTTATCTTCGTTAC  
CTTTTCTT---AAT-----AATGAGAAA-----

-----CAATTGGAGAGAACCGAGTCGATCCCT-----AGAACTACT-----GGTACTAGAATCAGA-  
-----AATAAA-----GTGACACGTTCA-----TTAAAAAA-----

AATCCTTTTGTAGCTAATCATTATTATTAGAAAAAGTTGAGAAGCTCAACATGAGAGAGGAAAAAAAAATAATAGTAACTTG  
GTCCCGGTCACTACCATTATACCTACAATGATCGGTCATACAATTGCTATTTCATAATGGAAGGGAACATTTACCTATTT  
ATATAACAGATCGTATGGTGGGTCAAAATTGGGGGAATTTGCACCTACTCTTACTTTC---CGA-----GGACAT---  
-----  
GCGAGAAACGATAATAGATCTCGTCGT-----

Citrus

GAAATGCGTTTTGGATAACATTCTTTTTTCGATTGGGTATGGCTTCAACTATTCTCAAGCCCCGCAATTGGTTAACCATCG  
ACATATTTTGTAGTTAATGGTTCGTATAGTCGATATACCAAGTTATCGTTGCAAACCCCGAGATATTATTACAGTAAGGGATG  
ACCCAAAATCTAGATCTCTGGTTCAAATTTATCTTGATTCACTCCACCATGAG-----  
GAATTGCCAAAGCATTGACTCTT-----CGCGCATTCCAA-----  
TATAAAGGATTAGTCAATCAAATAATAGATAGTCAATGGGTTCGTTTGA---  
ATAAATGAATTGCTTGTGCTAGAATATTATTCTCGTCAAAT-----  
ATGTCACGTCGAGGTACTACAGAAGAAAAAACTGCAAAATCCGATCCAATTTATCGTAATCGATTAGTTAACATGTTGGT  
TAACCGTATTCTGAAACACGGAATAAATCATTGGCTTATCAAATTTATCTATCGAGCCTTGAAAAAGATTCAACAAAAGA  
CAGAAAAAATCCACTATCTGTTTTACGTCAAGCAATACGTGGAGTAACTCCCGATATAGCAGTA-----  
AAGCAAGACGT---

GTAGGCGGATCGACTCATCAAGTTCCCATTGAAATAGGATCCGCACAAGGAAAAGCACTTGCCGTTTCGTTGGTTATTAGG  
GGCATCCCGAAAACGTCCGGGTGCAAAATATGGCTTTCAAATTAAGTTCCGAATTAGTGGATGCTGCCAAAGGGAGTGGCG  
ATGCC---ATACGCAAAAAGGAAGAGACTCATAGAATGGCAGAGGCAAATAGAGCTTTTGCACATTTTCGT-----  
---  
ATGGGCAAGGACACTATTGCTGACATAATAACTTCTATACGAAATGCTGACATGAATAGAAAGGGAACGGTTTCGAATAGC  
ATCTACTAACATC-----  
ACCGAAAACGTTGTTAAAATCCTTTTTCGAGAGGGTTTTATCGAAAACGCAAGGAAACTCGTGGAAAACAAAAACAAAA  
AGAGTTTTTGGTTTTAACCTACGACAT-----CGAAGGAATAGGAAAGGG-----CCGTATAGACCC-----ATT-  
-----  
TTAAATTTAAAACGAATCAGTCGACCCGGTCTACGAATCTATTTTAACTATCGACGAATTCCTAGAATTTTAGATGGGAT  
GGGATTGTAATTTCTCTACTTCTCGGGGTATAATGACAGACCGAGCGGCTCGACTGGAAAGAATCGGTGGAGAAATTT  
TGTGTTATATATGG---ATGGCAAATCTCCACCACGAAGTGGT---TCACGT-----  
AGGCCGGGACGGATCGGTTACGTAAAAGTGGACGTCGA---  
ATACCAAAGGGCGTTATTCATGTTCAAGCAAGTTTCAACAACACCATTGTGACTGTTACAGATGTCCGGGGTCCGGTAAT  
TTCTTGGTCTCGCCGGTACTTGTGGATTACAGGGGTACAAGAAGAGGTACGCCTTTTGTGCTCAAACCGCAGCAGGAA  
ATGCTATTTCGAGCAGTAGCGGATCAA---  
GGTATGCAACGAGCAGAAGTCATGATAAAGGGTCTGGTCTCGGAAGAGATGCGGCATTACGAGCTATTTCGTAGAAGCGG  
TATCCTTTTTAAATTTTCGTACGGGATGTAACCCCTATGCCACACAATGGTTGCAGACCCCTAAAAAAGACGGGTG---  
ATGCCAACTATTAACAACCTTATTAGAAACCCAAGACAGCCAATTAGAAATGTTACCAAATCCCCGCTCTGCGGGGATG  
TCCTCAGCGCCGAGGAACATGTACAAGGGTGTAT-----  
ACTATCACCCCCAAAAACCAAACCTCTGCCTTACGTAAAGTTGCCAGAGTACGATTAACCTCTGGGTTTGAATCACTGC  
TTATATACCTGGTATTGGCCATAATTCACAAGAACATTCTGTAGTCTTAGTAAGAGGGGGGAGGGTTAAGGATTTACCCG  
GTGTGAGATATCACATTGTTTCGAGGAACCTTAGATGCTGTGCGGAGTAAAGGATCGTCAACAAGGGCGTTCTAAATATGGG  
GTCAAAAAGCCAAA-----  
-----  
ATGGCAAGGCAAAGTTTGATTTCAGAGGGAAAAGAAAAGGCACAAATTTGGAACAAAAATATCATTTCGTCGATCCTC  
AAAAAAGAAATA---AACAAAGCTCCATCGTTGAGC-----GATAAATGG-----  
AAAATTCATGGAAAGTTACAATCCTCACCGCGTAATAGTGCACCTACCCGTCTTCATCGACGTTGTTTTTTGACCGGAAG  
GCCGAGAGCTAACTATCGAGACTTTGGACTATCCGGACACATACTTCGTGAAATGGTTTCATGCGTGTGTTGTTGCCGGGG  
CAACAAGATCAAGTTGG-----ATGGTAAAA---  
AATGCATTCATCTCA-----GTTAGGGTT-----CAAGAAAAAAGAAAAA---AAC-----AGCGGA---  
TCGGTTGAATTTCAAGTATTTTCGTTTACCAACACGATCCGGAGACTTACTTCACATTTAGAATTGCACAGAAAAGACTA  
TTCATCTCAAAGGGGTCTACGTAAAATTTTGGAAAAACGCCAACGTCTACTAGCTTATTTGTCAAAGAAAAATAGAGTAC  
GTTATAAAGAATTA-----ATTAGTAAGTTGAATATCCGGGAGTCAAAAAATCGT-----  
ATGGTAAAACCTTCGTTTGAACGATGTGGTAGAAAGCAACGAGCCGTTTATCGAATCGTTGCAATTGATGGTTCGATCCCG  
AAGAGAAGGAAGAGATCTTCGGAAAGTGGGTTTTTATGATCCGATAAATAATCAAACCCATTTAAATGTTTCTGCTATTC  
TATATTTCTTGGCAAG-----GGCGCTCAACCTACAGGAACCGTTTCATGATATTTACAGAAAGCGGGGGTTTTT---  
ACAGAA-----GTTAGT-----CTT-----AATCAA---ACGAAATTCATTAA-----  
-----ATGGATAAA-----ACCAAGCGACTCTTTCTTAAATCCAAGCGATCTTTTCGT-----  
-----  
-----AGGCGTTTG---CCCCG---ATC---  
CAATCGGGGGATCGAATTGATTATAGAAACATGACTTTAATTAGTCGATTTCTTAGTGAACAAGGAAAAATATTATCTAG  
ACGGGTGAATAGATTGACCTTAAAGAACAACGATTAATTACTATTGCTATAAAACAAGCTCGTATTTTATCTTCGTTAC  
CTTTTCTT---AAT-----AATGAGAAA-----  
-----  
-----CAATTTGAAAGAAGTGGGTTGACCGCT-----AGACCTCC-----GGTCTTAGAACCAGA-  
-----AAAAA-----  
-----GTGACACGTTCA-----CTAAAAA-----  
-----  
AATCCTTTTGTAGCGAATCATTTATTAAGAAAAATCGATAAGCTTAATACAAAAGCGGAAAAAGAAATAATAATAACTTG  
GTCCCGGGCATCTACCATTATACCCACAATGGTCGGCCATACTATTGCTATCCATAATGGAAGGGAGCATTTCCTATTT  
ATATAACAGATCGTATGGTAGGACATAAATTTGGGAGAATTTGCGCCCACTATCAATTTCCGT-----GGACAT---  
-----  
GCAAAAATGATAATAGATCCCGTCGT-----

-----  
ATGATTTTTCAATCTTTTATACTAGGTAATCTAGTATCCTTATGCATGAAGATAATC-----  
AATTCGGTCGTTTGGTGC-----  
GGACTCTATTATGGATTTATGACCACATTCTCCATAGGGCCCTCTTATCTCTTCTCTCCGAGCTCGGGTTATG-----  
----GAAGAAGGAGAAGAAGGAACCGAGAAGAAGGTATCAGCAACAACACT---  
GGTTTTATTGCGGGACAGCTCATGATGTTTCATATCGATCTATTATGCGCCTCT  
Coffea  
GAAATGCGTTTTGGATAACATCCTTTTTTCGATTGGGTATGGCTTCAACTATTCTGCAGCTCGTCAATTAGTTAACCATAG  
ACATATTTTAGTTAATGGTCGTATAGTAGATATACCAAGTTATCGCTGCAAACCCCGAGATATTATTACGGGGAAGGATG  
AACAAAAATCCCGAGCTCTGATTCAAAAATCTCTGGATTTCATCCCCTCAAGAG-----  
GAATTGCCAAGTCAATTTGACCCTT-----CACCCATTCCAA-----  
TATAAAGGATTAGTCAATCAAATAATAGATAGTAAATGGGTTCGGTTTGAAA---  
ATAAATGAATTGTTAGTCGTAGAATATTATTCTCGACAGACTTAA-----  
ATGTCACGTCGAGGTGCTGCAGAAGAAAAACAGCCAAATCCGATCCAATTTATCGCAATCGATTAGTTAACATGTTGGT  
TAACCGTATTCTGAAACACGGAATAAATCATTGGCTTATCAAATTATCTATCGAGCCGTGAAAAAGATTCAACAAAAGA  
CAGAAACAAATCCACTATCTGTTTTACGTCAAGCAATACGTGGAGTAACTCCCGATATAACAGTA-----  
AAAGCAAGACGT---  
GTAGGCGGATCGACTCATCAAGTTCCCATTGAAATAGGATCCACACAAGGAAAAGCACTTGCCATTGCTTGGTTATTAGC  
GGCATCCCGAAAACGTCCGGGTCGAAATATGGCTTTCAAATTAAGTTCCGAATTAGTGGATGCTGCCAAAGGGAGTGGCG  
ATGCC---ATACGCAAAAAGGAAGAGACTCATAGAATGGCAGAGGCAAATAGAGCTTTTGCACATTTTCGT-----  
---  
ATGGGTAGGGACACTGTTGCTGAGATAATAACCTCTATACGAAATGCTGATATGGATAAAAAAAGAGTGGTTTGAATAAC  
ATCTACTAATATT-----  
ACCGAAAATATCGTTAAAATACTTTTACGAGAAGGTTTTATCGAAAATGCGAGAAAACATCGAGAAAACAACAAA-----  
-TATTTTTTGGTTTTAACGCTGCGACAT-----AGAAGGAACAGGAAAGGG-----CCCCATAGAAAT-----ATT-  
-----  
TTTTAATTTAAAACGGATCAGTCGACCCGGTCTACGAATTTATGCTAACTCTCAACGAATTCCTCGAATTTTAGGTGGGAT  
GGGATTTGTAATTTTTTCTACTTCTCGAGGAATAATGACAGACCGAGAGGCTCGACTAGAAGGAATCGGTGGAGAAATTT  
TGTGTTATATATGG---ATGGCAAAGCTATACCGAGAGTTGGT---TCACGT-----  
AAGAACGGACGTATTAGTTCACGTAAGAGTGCAGGTAGA---  
ATACCAAAGGGAGTTATTCATGTTCAAGCAAGTTTTTATAATACCATTGTCACTGTTACAGATGTACGGGGTCGAGTGGT  
TTCTTGGTCTCCGCCGGTACTTGTGGATTACAGAGGTACGAGAAGAGGGACACCATTTGCTGCTCAAACCGCAGCAGCAA  
ATGCTATTTCGTACAGTAGTGGATCAA---  
GGTATGCAACGAGCAGAAGTCATGATAAAAGGTCCCGGCCTCGGGAGAGACGCAGCGCTTCGAGCTATTTCGTAGAAGTGG  
TATAGTATTAACCTTTCGTACGAGATGTAACCTCTATGCCACATAATGGCTGTAGACCTCCCAAAAAAAGACGTGTG---  
ATGCCAACTATTAACAACCTTATTAGAAATGCAAGACAGCCAATAAGAAATGTCACGAAATCCCCCGCCTTCGGGGATG  
CCCTCAGCGTCGAGGAACATGTACTCGGGTGTAT-----  
ACTATCACCCCCAAAAACCAAACCTCTGCCTTACGTAAAGTTGCCAGAGTACGATTAACCTCTGGATTTGAAATCACTGC  
TTATATACCCGGTATTGGCCATAATTTACAAGAACATTCTGTAGTCTTAGTAAGAGGGGGAAGGGTTAAGGATTTACCCG  
GTGTGAGATATCACATTGTTTCGAGGAACCTAGATGCTGTTCGGAGTAAAGGATCGTCAACAAGGGCGTTCTAAATATGGG  
GTAAAAAAGCCAAA-----  
-----  
ATGGCAAGGAAAGGTTTTGATTCAGCGGGAGAAGAAGAGGCAAAAGTTGGAACAGAAATATCATTGATTTCGTCGATCCTC  
AAAAAAGAAATA--AGCAAAGTTCAGTCATTAAT-----GACAAATGG-----  
GAAATTTATAGAAAAGTTACAATCTCCACCGCGGAATAGTGCACCTACACGCCTTCATCGACGTTGTTTTGCGACCCGGAAG  
ACCAAGAGCTAATTATCGAGACTTTGGACTGTCCGGACATATACTTCGTGAAATGGTTCATGCATGTTTGTGTCAGGAG  
CAAGAAGATCAAGTTGG-----ATGGTAAAA---  
AATACACTCATTTCA-----GTCATTTCT-----GAAGAAGAA-----AAG-----AGGGGG---  
TCTGTTGAATTTCAAGTATTCCGTTTTTACCAATAAGATACCGGAGACTTACTTCACATTTGGAATTGCACAAAAAAGACTA  
TTTATCTCAAAGAGGCTTACGAAAAATTTGGGAAAACGTCAACGGCTGTTGGCTTATTTGGCAAAAAAATAGAGTAC  
GTTATAAAGAATTA-----ATTGGTCTATTGAGTATTTCGAGAGACCAAACCTCGT-----  
ATGCTAAAACCTTCGTTTTGAAACGATGTGGTAGAAAGCAACGAGCTGTCTTTCGAATCGTTGCAATTGATGTTTCGATCCCG  
AAGAGAAGGAAAAGATCTGCAGAAAAGTGGGTTTTTATGATCCGATAAAGAATCAAACCTATTTAAACGTTACTGCTATT  
TATATTTCTTGAACAG-----GGTGCTCAACCTACAGGAACCTGTTCAAGATATTTTTAAAAGGCGGGGGTTTTT---  
AAGGAA-----CTTCGC-----CCT-----AATCAA---ATGAAGTTCAATTAA-----  
-----ATGGATAAA-----TCCAACGATCTTTTCTTAAATCCAAGCGATCTGTTTCGT-----  
-----

-----AGGCGTTTG---CCCCG---ATT---  
CAATCGGGGGATCTAATTGATTATAGAAACATGAGTTAATTAGTCGATTTATTAGTGAACAAGGAAAAATATTATCCAG  
ACGGGTGAATAGATTGACCTTGAAACAACAACGATTAATTACTGTTGCTATAAAACAAGCTCGTATTTTATCTTTGTTAC  
CCTTTCTG---AAT-----AATGAGAAA-----  
-----  
-----  
-----  
-----  
-----CAGTTTGAAAGAACCGAGTCGACTGCT-----AGAACTACT-----GGTCTTAGAACTAGA-  
-----AATAAA-----  
-----GTGACACGTTCA-----CTAAAAAA-----  
-----  
AATCCTTTTGTGGCCAATCATTTTATTAATAAAAAAATTGATAAACTTAATACAAAAGCAGAAAAAGAAATAATAGTAACCTG  
GTCCCGGGCATCTACCATTATACCCACAATGATAGGACATACCATTGGTATCCATAATGGTAAAGAACATCTGCCTATTT  
ATATAACAGATCGTATGGTAGGCCACAAATTGGGAGAATTTGCACCTACTTTAAATTTT---CGA-----GGACAT---  
-----  
GCAAAAAGCGATAATAGATCTCGTCGT-----  
-----  
ATGATTTTTCAATCTTTTCTACTAGGTAATCTAGTATTCTTATGCATGAAGATAATC-----  
AATTCGGTCGTTGTGGTC-----  
GGACTCTATTATGGATTTCTGACCACATTCTCCATAGGGCCCTCTTATCTCTTCTTCTCCGAGCTCGGGTTATG-----  
----GAAGAAGGA-----ACCGAGAAGAAGGTATCAGCAACAAC---  
GGTTTTATTACGGGACAGCTCATGATGTTTCATATCGATCTATTATGCGCCTCT  
Cucumis  
GAAATGCGTTTTGGATAACATCCTTTTTCGATTGGGTATGGCTTCGACTATTCTCAAGCCCGACAATTAGTTAATCATAG  
ACATATTTTAGTTAATGGTTCTATAGTGGATATACCAAGTTATCGGTGCAAACCCCGAGATATTATTACAGCAAAAAGATG  
AAAAAAATCGAGAACACTGATTCAAAATTATCTTGATTCATCCCCCCTCAG-----  
GAATTGCCAAAACATTTGACTCTT-----CAGCCATTGCAA-----  
TATAAAGGATTAGTCAATCAATAATAGATAGTAAATGGGTGAGTTTAAAA---  
ATAAATGAATTGCTCGTTGTAGAATATTATTCTCGTCGACT-----  
ATGTCACGTCGAGGTACTGCAGAAGAAAAAATTGAAAAATCCGATCCAATTTATCGTAATCGATTAGTTAACATGTTGGT  
TAACCGTATTCTGAAACATGGAAAAAATCATTGGCTTATCAAATTATCTATCGAGCCATGAAAAAGATTCAACAAAAGA  
CAGAAACAAATCCACTATCTGTTTTACGTCAAGCAATACGTGGAGTAACTCCCGATATAGCAGTA-----  
AAGGCAAGACGT---  
GTAGGCGGATCAACTCATCAAGTTCCCATTGAAATAGGATCCACACAAGGAAAAGCACTTGCCATTGCTTGGTTATTAGG  
GGCATCCCGAAAACGTCCCGGTGCAAAATATGGCTTTCAAATTCAGTTCGGAATTAGTGGATGCTGCCAAAGGGAGTGGCG  
ATGCC---ATACGTAAAAAGGAAGAGACTCATAGAATGGCAGAGGCAAATAGAGCTTTTGCACATTTTCGT-----  
-----  
ATGGGTAAGGACACTATTGCTAACATAATAACCTCTATTTCGCAATGCTGACATGAATAGAAAAGGAATGGTTCGAATACC  
AGCTACTAACATC-----  
ACCGAAAACATTGTTAAATACTTTTACGAGAAGGTTTTATTGAAAACGTAAGGAAACATCGGGAAAGCAACAAG-----  
-GATTTTTGGGTTTTAACCTACGACAT-----AGAAGAAATAGGAAAGGA-----CCATATAAACG-----ATT-  
-----  
TTAAATTTAAAACGGATCAGTCGACCCGGTCTCCGAATATATTCTAACTATCAAAAAATTCCTAGAATTTTAGGAGGAAT  
GGGCATTGTAATTTCTTCTACTTCTCGGGGTATAATGACAGACCGAGAAGCTCGACTACAGGGAATCGGCGGGCAAAATTT  
TGTGTTATATATGG---ATGGCAAACCCATACCAAGAATCGGT---TCACGT-----  
AGAAATGGACGTATTAGCTCACGTAAAAGTACGCGTAGA---  
ATACCAAAGGGCGTTATTTCATGTTCAAGCAAGTTTCAACAATACAATTGTGACTGTTACAGATGTACGGGGTGGGTAAT  
TTCTTGGTCTCCGCCGGTACGTGTGGATTCAAAGGTACAAGAAGAGGGACACCATTTGCCGCTCAAACCGCAGCAGGAA  
ATGCTATTTCGGGGAGTAGTGGATCAA---  
GGGATGCAACGAGCCGAAGTTATGATAAAGGGCCCCGGTCTCGGAAGAGATGCAGCATTAAAGAGCTATTTCGGAGAAGCGG  
TATATTATTAAGTTTCATACGGGATGTAACCCCTATGCCACATAATGGCTGTAGGCCCCCTAAAAACGACGTGTG---  
ATGCCAACTATTAACAACCTATTAGAAACACAAGACAGCCAATCAGAAATGTCACCAAATCGCCCGCCCTTCGGGGATG  
CCCTCAGCGTCGAGGAACATGTACTAGGGTGTAT-----  
ACTATCACCCCCAAAAACCAAACCTCTGCCTTACGTAAAGTTGCCAGAGTACGCTTAACCTCGGGATTTGAAATCACTGC  
TTATATACCTGGTATTGGCCATAATTTACAAGAACATTCTGTAGTCTTAGTAAGAGGGGGAAGGGTTAAGGATTTACCCG  
GTGTGAGATATCACATTGTTTCAGGAACCCCTAGATGCTGTGCGAGTAAAGGATCGTCAACAAGGGCGTTCTAAATATGGG

GTCAAAAAGCCAAA-----  
-----  
ATGGCAAGGAAAAGTTTAATTCAGAGGGGAGAAGAAGAGGCCAAAAATTGGAACAAAAATATCATTGATTTCGTCATCCTT  
AAAAAACGAAATA---AGCAAAGTTCCATCGTTGAGT-----GAGAAATGG-----  
GAAATTCATGGAAAGTTACAATCCCCACCGCGTAATAGTGCACCCACACGTCTTCATCGACGTTGTTTTTAACCGGAAG  
ACCGAGAGCTAACTATCGAGACTTTGGGCTCTCTGGACACATACTTCGTGAAATGGTTCATGCATGCTTGTTCCTGGGG  
CAACAAGATCAAGTTGG-----ATGGTAAAA---  
AATTCATTGAGCTCA-----GTTATTTTCG-----CAAGAAGAAAAAAGAA---AAT-----GGAGGA---  
TCCGTTGAATTTCAAGTAGTCAGTTTACCAATAAGATACGAAGACTTACTTCACATTTGGAATTGCACAAAAAAGACTA  
TTTATCTCAAAGAGGTCTACGTAAAATTCTCGGAAAACGCCAACGATTACTTTCTTATTTATCAAAGAAAAATAAAATGC  
GTTATAAAGAATTA-----ATTAATCAATTGGATATTCGGGAGTCAAAAACACTCAG-----  
ATGGTAAAACCTTCGTTTAAAACGATGTGGTAGAAAGCAACGAGCTGTTTATCGAATCATTGCAATTGATGTTTCGATCCCG  
AAGAGAAGGAAGAGATCTTCGTAAAGTGGGTTTTTATGATCCGATAAAGAATCAAACCTATTTAAATGTTTCCTGCGATT  
TATATTTCTTGAAAAG-----GGTGCTCAACCTACAGGAAGTTCATGATATTTTAAAGAAGGCAGGTGTTTTT---  
ACGGAA-----CTTCAC-----CTT-----AATCAA-----TAA-----  
-----ATGGATAAA-----TCCAAGCGACTCTTTCTTAAATCCAAACGATCTTTTCGT-----  
-----  
-----AGGCGTTTG---CCCCG---ATT---  
CCATCGGGGGATCGAATTGATTATAGAAACATGAGTTAATTAGTCGATTTATTAGTGAACAAGGAAAAATATTATCTAG  
ACGGGTAAATAGATTGACCTTAAAACAGCAACGCTTAATTACTATTGCTATAAAACAAGCTCGTATTTTATCTTTGTTAC  
CTTTTCTT---AAT-----AATGATAAAAATGATAAA-----  
-----  
-----  
-----CAATTTGAAAGAAGCGAGTCGACTCCT-----AGAACTATT-----GGTCTTAGAACCAGG-  
-----AATAAA-----  
-----ATGGCGCGATCA-----TTAAAAAA-----  
-----  
AATCCTTTTGTGGGAAACCATTTATTAATAAATAAATAAAGCTTAACACAAAGGGAGAAAAAGAAATAATAGTAACTTG  
GTCCCAGCATCTACCATTATACCAACAATGATTGGGCATACTATCGCTGTTTATAATGGAAAGGACCATTTGCTGTTT  
ATATAACGGATCGCATGGTAGGTCATAAATTGGGAGAATTTGCACCCACTCGCAATTTT---CGG-----GGGCAT---  
-----  
GTGAAAAATGATAATAGATCTCGTCGT-----  
-----  
ATGATTTTAAAATCTTTTATACTAGGTAATCTAGTATCCCTATGCATGAAGATAATC-----  
AATTCGGTTCGTTGTGGTC-----  
GGACTCTATTATGGATTTCTGACCACATTCTCCATAGGGCCCTCTTATCTCTTCTTCTCCGAGCTTGGCTTATG-----  
----GAAGAAGGA-----ACCGAGAAGAAAGTATCAGCAACAACA---  
GGTTTTATTACGGGACAGCTCATGATGTTTCATATCGATCTATTATGCGCCTCT  
Daucus  
GAAATGCGCTTGGATAACATCCTTTTTCGATTGGGTATGGCTACGACTATTCTGGAGCCCGTCAATTAGTTAACCATAG  
ACATATTTTAGTCAATGGTCGTATAGTAGATATACCAAGTTATCGCTGCAAACCCGAGATATTATTACGGCGAGGGATG  
AACAAAACCTTAGAGCTCTGATTCAAATTTCTTTCAATTCACCCTCTCAGGAC-----  
GAAATGCCAAAACATTTGACTCTT-----CAACCATTCCAA-----  
TATAAAGGATTAGTCAATCAAATAATAGATAGTAAATGGGTTCGTTTTGAAA---  
ATAAATGAATTGCTAGTCGTAGAATATTATTTCGCGCCAGACC-----  
ATGTCACGTCGAGGTACTGCAGAAGAAAAACTGCAAATCCGATCCAATTTATCGTAATCGATTAGTTAACATGTTGGT  
TAACCGTATTCTGAAACACGGAAAAAAATCATTGGCTTATCAAATTATCTATCGAGCCGTGAAAAAGATTCAACAAAAGA  
CAGAAACAAATCCACTATCTGTTTTACGTCAAGCAATACGTGGAGTAACTCCCGATATAGCAGTA-----  
AAAGCAAGACGT---  
GTAGGTGGATCGACTCATCAAGTTCCCATTGAAATAGGATCCACACAAGGAAAAGCACTTGCCATTGCTTGGTTATTAGC  
GGCATCCCGAAAACGTCCGGGTCGAAATATGGCTTTCAAATTAAGTTCCGAATTAGTGGATGCTGCCAAAGGGAGTGGCG  
ATGCC---ATACGCAAAAAGGAAGAGACTCATAGAATGGCAGAGGCCAAATAGAGCTTTTGCACATTTTCGT-----  
---  
ATGGGTAGGGATATTATTGCTGACATAATAACTTCTATACGAAATGCTGATATGGATCGAAAAAGGGCGGTTTCAATAGC  
ATCTACTAATATC-----

ACTGAAAATATTGTTAAAATACTTTTACGAGAAGGTTTTATTGAAAACGTGAGAAAACATAAAGAAACCAAAAAA-----  
-GATTTTTTGGTTTTAAACCCTACGACAT-----AGAAGGAATAGGAAAAGA-----TCTTATAGAAAT-----TTT-  
-----  
TTAAATTTAAAACGGATCAGTCGGCCTGGTCTACGAATCTATTTCGAACTACCAACGAATTCCTAGAATTTTAGGTGGGAT  
GGGAATTGTAATTATTTCTACTTCCCGAGGTATAATGACAGACCGAGAAGCTCGACTAGAACGAATTGGCGGAGAAGTTT  
TGTGTTATATATGG---ATGGCAAAAACCTATACCGAGAATTGGT---TCACGT-----  
AAGAATGGACGTATTGGTTCACGTAAGAATACACGGAGA---  
ATACCAAAGGGGGTTATTCATGTTCAAGCAAGTTTCAATAATACTATTGTGACTGTTACAGATGTACGGGGTCGAGTGGT  
TTCTTGGTCTCCGCCGGTACTTGTGGATTCAAGGGTACACGAAGGGGTACGCCCTTTGCTGCTCAAACCGCAGCAGGAA  
ACGCTATTCGTACAGTAGTGGATCAA---  
GGTATGCAACGAGCGGAAGTCATGATAAAAAGGACCGGGTCTCGGAAGAGACGCGGCATTACGCGCTATTTCGCAGAAGTGG  
TATACTTAACCTTTTGTGCGTGATGTAACCCCTATGCCACATAATGGCTGTAGACCTCCAAAAAAGCGACGTGTG---  
ATGCCAACTATTAACAACCTTATTAGAAATACAAGACAGCCAATCAGAAATGTCACAAAATCCCCCGCACTTCGGGGATG  
CCCTCAGCGTCGAGGAACATGTACTAGGGTGTAT-----  
ACTATCACCCCCAAAAACCAACTCTGCCCTACGTAAAGTTGCCAGAGTACGATTAACCTCTGGATTTGAAATCACTGC  
TTATATACCCGGTATTGGCCATAATTCACAAGAACATTCTGTAGTCTTAGTAAGAGGGGGAAGGGTTAAGGATTTACCCG  
GTGTGAGATATCACATTGTTTCGAGGAACCCTAGATGCTGTGCGAGTAAAGGATCGTCAACAAGGGCGTTCTAAATATGGA  
GTA AAAAAGCCAAA-----  
-----  
ATGGCAAGAAAAGTTTTGATTAGAGGGGAGAATAAGAGGCCAAAAATTGGAACAAAAATATCATTTCGATTTCGTCGATCCTC  
AAAAAAGAAATA---AGGCAAGTTCTGTCTTAAGC-----GACAAATGG-----  
GAAATTTATGGAAAGTTACAATCTCCGCCGCGGAATAGTGCACCTACACGCCTTCATCGACGTTGTTTTTCGACCGGAAG  
GCCGAGAGCTAACTATCGAGACTTTGGACTATCTGGACAGATACTTCGTGAAATGGTTCACGCATGTTTATTGCCAGGGG  
CGACAAGATCCAGTTGG-----ATGATAAAA---  
AATTCATTAGTGCA-----ATTTTTTTT-----AAAGAGGAAAACGAAGAC---AAC-----AAGGGG---  
TCTGTTGAATTTCAAGTAGTGAGTTTACCAATAGGATACGTAAACTTACTTCACATTTGGAATTGCACAAAAAAGACTA  
TTTATCTCAGAGAGGTCTGCGTAAAATTCTAGGAAAACGTCAACGGCTGCTCGCCTATTTGTCAAAAAAATAGAGTAC  
GTTATAAAGAATTA-----ATCGGCCAGTTGGAGATTTCGAGAAAACAAAAAAT-----  
ATGTA AAAACTTCGTTTTGAAACGCTGTGGTAGAAAAGCAACGAGCCGCTCATCGAATCGTTGCAATTGATGTTTCGATCCCG  
AAGAGAAGGAAGAGATCTTCGGAACGTAGGTTTTTATGATCCGATAAAGAATCAAAGTTATTTAAACGTTTCTGCTATT  
TATATTTCTTGAAAAG-----GGCGCTCAGCCACAGGAACGTTCGGGATCTTTTAAAAAAGGCGGAAGTTTTT---  
AAGTAG-----  
-----ATGGATAAA-----TCCAAGCGACCTTTTCTTAAATCCAAGCGATCTTTTCGT-----  
-----  
-----AGGCGTTTG---CCCCG---ATT---  
CAATCGGGGGATCGAATTGATTATAGAAACATGAGTTTAATTAGTCGATTTATTAGCGAACAAGGAAAAATATTATCTAG  
ACGGGTGAATAGATTGACCTTGAAACAACAACGATTAATTACTATTGCTATAAAGCAGGCTCGTATTTTATCTTTGTTAC  
CTTTTCTT---AAT-----AATGAGAAA-----  
-----  
-----CAATTTGAAAGAACCGAGTCGACCACC-----AGAACTGCG-----GGTCTTCGAGCCAGA-  
-----AATAAA-----  
-----GTGACACGTTCA-----CTAAAAAA-----  
-----  
AACCCTTTTGTAGCAAATCGTTTTATTAAGAAAAATTGATAACCTTAACACAAAAGCAGAAAAAGAAATAATAAATACTTG  
GTCTCGGGCATCTACCATTATACCCACAATGATCGGCCATACCATTGCTATCCATAATGAAAGGAACATTTACCTATTT  
ATATAACCGATCGTATGGTAGGCCACAAATTGGGAGAATTTGCACCTACTTTAAATTTT---CGA-----GGACAC---  
-----  
GCAAAAAGCGATAATAGATCTCGTCGT-----  
-----  
ATGATTTTGAATCTTTTCTACTAGGTAATCTAGTATCCTTATGCATGAAGATAATC-----  
AATTCGGTCTGTTGTGGTC-----  
GGACTCTATTATGGATTTCTGACCACATTCTCCATAGGGCCCTCTTATCTCTTCTTCTCCGAGCTCAGGTTATG-----  
-----GAAGAAGGAGAAGAAGGAACCGAGAAGAAGGTATCAGCAACAACA---  
GGTTTTATTACGGGACAGCTCATGATGTTTATATCGATCTATTATGCGCCTCT

Dioscorea

GAGATGCGTTTTGGATAACATACTTTTTTCGATTGGGTATGGCTTCGACCATTCTGCAGCCAGGCAATTAGTTAACCATAG  
ACATATTTTTAGTTAATGGTCGTATAGTGGATATACCAAGTTATCGTTGCAAACCCAGAGATATTATTACTAGCAAAGATA  
AACAAAGATCGAAAGTTCTGATTCAAATTTCTATTGAATCGTCCCCCATGAG-----  
GAATTGCCAAAACATTTGACTATT-----GACTCATTCCAA-----  
TATAAAGGATTAGTAAATCAAATAATAGACAGTAAATTGATTGGTTTTGAAA---  
ATAAATGAGTTGTTAGTCGTAGAATATTATTCCTCGTCAGACT-----  
ATGTCACGTCGAGGTACTGCAGAAGAAAAAACTGCAAAATCCGATCCAATTTATCGTAATCGATTAGTTAACATGTTGGT  
TAACCGTATTCTGAAACACGGAAAAAAATCATTGGCTTATCAAATTATCTATCGAACCGTGAAAAAGATTCAACAAAAGA  
CAGAAACAAATCCACTATCTGTTTTACGTCAAGCAATACGTGGAGTAACTCCCATATAGCAGTA-----  
AAAGCAAGACGT---  
GTAGGCGGATCGACTCATCAAGTTCTTATTGAAATAGGATCTACACAAGGAAAAGCACTTGCCATTGCTTGGTTATTAGG  
GGCATCCCGAAAACGTCCGGGTGCAAAATATGGCTTTCAAATTAAGTTCCGAATTAGTAGATGCTGCCAAAGGGAGTGGCG  
ATGCC---ATACGTAAAAGGAAGAGACTCATAGAATGGCAGAGGCAAATAGAGCTTTTGCACATTTTCGT-----  
---  
ATGGGTAGGGATACTATTGCCAATATAATAAATTCTATAAGAAATGCTGACATGGATAAAAAAGGAACGGTTTCCAATAGC  
ATCCACTAATATC-----  
ACCGAAAACATTGTTAAAATACTTCTACGAGAAGGTTTTATTGAAAACGTTGAAAACATCAGGAAAATCAGAGA-----  
-TTTTTCTTGGTTTTCAACCCTACGACAT-----AGAAGGACTAGTAAAGGA-----GTATATAGAACT-----ATT-  
-----  
TTAAAACGTATCAGCCGACCCGGTCTACGAATCTATTCCAATCAACGAATTCCTAAGATTTTAGGTGGAATAGGGAT  
TGTAATTTCTTTCTACTTCTCAAGGTATAATGACAGATCGAGAAGCTCGACTAAAAAAATTTGGAGGAGAAATTTTGTGTT  
ATATATGG---ATGACAAAACCTATACCAAGAATTGGT---TCCCGT-----  
AGGAATGGGCGTATTGGTTCACGCAAGAATGCACGTAGA---  
ATACCAAAGGAGTTATTCATGTTCAAGCGAGTTTCAATAATACCATTGTAAGTGTTCAGATGTACGTGGTCAGGTGAT  
TTCTTGGGCCTCCGCGGGTACTTCTGGATTCAAAGGCACAAGAAGAGGAACACCCTATGCTGCTCAAGCTGCAGCAGTAA  
ACGCTATTCGTACAATAATTGATCAG---  
GATATGCAACGAGCAGAAGTTATGATAAAGGGTGTGTTTTCGGAAGAGATGCAGCATTACGAGCCATTTCGTAGAAGTGG  
TATACTAATTAAGTTTCGTACGTGATGTAACACCTATGCCACATAATGGATGTGACCTCCCCAAAAAAGACGTGTA---  
ATGCCAACTATTAACAACCTTATTAGAAATACAAGACAGAAAAAAGAAATGTCACGAAATCCCCCGCTCTTCGAGGATG  
TCCTCAGCGTCGAGGAACATGTACTAGGGTGTATAAT-----  
ATGGGGATCACCCCCAAAAACCAAACCTCTGCCTTACGTAAAGTTGCCAGAGTACGATTAACCTCTGGATTTGAAATCAC  
TGCTTATATACCTGGTATTGGCCATAATTTACAAGAACATTCTGTAGTATTAGTAAGAGGAGGAAGGGTTAAAGATTTAC  
CGGGTGTGAGATATCACATTGTTTCGGGGAACCCTAGATGCTGTGCGAGTAAAGGATCGTCAACAAGGGCGTTCT-----  
-----AGTGCCTTG-----  
-----  
ATGGCAAGAAAAAGTTTTGATTCATAGGGAGAAGAAACGGCATAAACTGGAACAGAAATATCAGTTGATTCGTCGATCCTC  
AAAAAAGAAATA---AGCAAAGTTCTACCGTTGAGT-----GAAAAATGG-----  
AAAATTCATAGGAAATTGCAATCGTCACCACGTAATAGTGCACCTATACGTCTTCATCGACGTTGTTTTTTGACTGGAAG  
ACCTAGAGCTAACTATCGAGACTTTGGGCTATCCGGACACATACTTCGTGAAATGGTTTTATGCATGTTTGTACCAGGGCG  
CAATAAGATCAAGTTGG-----ATGATCAAA---  
AATTCATTCATCTCA-----GTTATTCCA-----CAAGAAGAAAAAGAGGAA---AAC-----AAGGGA---  
TCTGTTGAATTTCAAGTATTGATTTTACCAATAAGATACGTAGACTTACTTCCCATTTAGAATTGCACAAAAAAGATTT  
TTTATCGCAAAGAGGTCTACGAAAAATCTGGGAAAACGTCAACGACTGCTGACTTATTTGTTAAAGAAAAATAGAGTAC  
GTTATAAGAAATTA-----ATTGGTCAGTTGGATATTCGGGAACCTAAAATTCAT-----  
-----  
-----  
-----ATGGATAAA-----TCCAAGCAACCTTTTCGTAAATCCAAGCGATCTTTTCGT-----  
-----  
-----AGGCGTTTG---CCCCA---ATT---  
GGATCGGGGGATCAAATCAATTATAGAAACATGAGTTTAATTAGTCGATTTATTAGTGAACAAGGAAAAATATTATCTAG  
ACGTGTCAATAGATTGACCTTGAAACAACAACGATTAATTACTATTGCTATAAAACAAGCTCGTATTTTATCTTTGTTAC  
CTTTTCTT---AAT-----AATGAGAAA-----  
-----  
-----

-----  
-----  
-----CAATTTGAGAGAGCCGAGTCGATCCCC-----CGAACTACT-----GGTCCTAGAACCAGA-----  
-----AATAAA-----  
-----GTGACACGTTCA-----CTAAAAAAA-----  
-----

AATCCTTTTGTAGTTGATCATTATCGGGAAAAATTGAAAACTCAACATGAGGGAGGAGAAAGAAATAATAGTAACTTG  
GTCTCGGGGATCTACCATTATACCCGCAATGATGGGACATACAATTGCCATTCATAATGGAAAGGAGCATTTCCTATTT  
ATATAACAGATCAAATGGTAGGTCACAAATTGGGAGAATTTCCCTACTCTTACTTTC---GCA-----AGACAT---  
-----  
ACGAGAAATGATAATAAATCTCGTCGT-----  
-----  
-----  
-----  
-----

Drimys

GAGATGCGTTTTGGATAACATCCTTTTTTCGATTGGGTATGGCTTCGACCATTCCGGGAGCCAGGCAATTAGTTAATCATAG  
ACATATTTTAGTTAATGGTCGTATAGTAGATATCCCAAGTTATCGCTGCAAACCCCAAGATATTACTACGAGGGATG  
AACAAAGATCCAGAGCTCTGATTCAAAATTATATGGATTCATCCCCCACGAG-----  
GAGTTGGCAAACATTTAAGTCTT-----TATTCATCCCAA-----  
TATAAAGGATTAGTAAATCAAATAATAGATATTAAGTGGATCGGTTTGAAA---  
ATCAATGAGTTGCTAGTCGTAGAATATTATTCCTCGTCAGACT-----  
ATGTCACGTCGAGGTACTGCAGAAGAAAAACTGCAAAATCCGATCCAATTTATCGTAATCGATTAGTTAATCATGTTGGT  
TAACCGTATTCTGAAACACGGAAAAAATCATTGGCTTATCAAATTATCTATCGAGCCGTGAAAAAGATTCAACAAAAGA  
CAGAAACAAATCCACTATCTGTTTTACGTCAAGCAATACGTGGAGTAACTCCCGATATAGCAGTA-----  
AAGGCAAGACGT---

GTAGGCGGATCGACTCATCAAGTTCCCATTGAAATAGGATCTACACAAGGAAAAGCGCTTGCCATTGCTTGGTTATTAGG  
GGCATCCCGAAAACGTCCGGGTCGAAATATGGCTTTCAAATTAAGTTCCGAATTAGTGGATGCTGCCAAAGGGAGTGGCG  
ATGCC---ATACGCAAAAAGGAAGAGACTCATAGAATGGCAGAGGCAAATAGAGCTTTTGCACATTTTCGT-----  
---

ATGAGTAAGGACACTATTGCCGATATAATAACTTCTATAAGAAATGCTGACATGGATAAAAAAGGAACAGTTCGAATAGC  
ATCTACTAATATA-----

ACCGAAAACATTATTAATAACTTCTACGAGAAGGTTTTATTGAAAATGTTAGGAAACATCGAGAAAACAACAAA-----  
-TATTTATTGATTTTAAACCCTGCGACAT-----AGAAGGAATCGGAAAGGA-----ACATATAGAAAT-----ATT-

TTAAAGTGTATCAGCCGACCCGGTCTACGAATCTATTCCAATAAACAATTCCTAGGATTTTAGGTGGAATAGGTAT  
TGTAATTTCTTTCTACTTCTCGAGGTATAATGACAGATCGAGAAGCTCGACTAAAAGGAATTGGAGGAGAAATTTTATGTT  
ATATATGG---ATGGCAAACCTATACCAAGAATTGGT---TCGCGT-----  
AGGAATGGA-----CGTAGA---

ATACCAAAGGAGTTATTCATGTTCAAGCGAGTTTCAACAATACCATTGTAACGTGTACGGATGTGCGAGGTTCGGGTGGT  
TTCTTGGTCTCCGCGGGTACTTGTGGATTTCAGAGGCACAAGAAGAGGGACACCTTTTGCTGCTCAAACCGCAGCAGGAA  
ATGCTATTTCGTACAGTAGTGGATCAG---

GGTATGCAACGAGCAGAAGTCATGATAAAGGGTCTGGTCTCGGAAGAGATGCAGCATTACGAGCCATTTCGTAGAAGTGG  
TATACTATTAAGTTTCGTACGTGACGTAACCCCTATGCCACATAATGGATGTAGACCTCCTAAAAAAGGCGTGTG---  
ATGCCAACTATTAACAACCTTATTAGAAACACAAGACAGCCAATCAAAAATGTCACGAAATCCCCGCCCTTCGAGGATG  
TCCTCAGCGTCGAGGAACATGTACTAGGGTGTAT-----

ACTATCACCCCCAAAAACCAAACCTCTGCCTTACGTAAGGTTGCCAGAGTACGATTAACCTCTGGATTTGAAATCACTGC  
TTATATACCTGGTATTGGCCATAATTTACAAGAACATTCTGTAGTCTTAGTAAGAGGAGGAAGGGTTAAGGATTTACCCG  
GTGTGAGATATCATTGTTTCAGGAACCCTAGATGCTGTGCGAGTAAAGGATCGTCAACAAGGGCGTTCTAAATATGGG  
GTCAAAAAGCCAAA-----  
-----

ATGGCAAGGAAAAGTTTTGATTTCAGAGGGAGAGGAAGAGGCAGAAATTGGAACAGAAATATCATTGATTTCGTGATCCTC  
AAAAAAGAAATA---AGCAAAGTTTCATCGTTGAGT-----GACAAATGG-----

GAAATTCATGAAAATTGCAATCCCCACCACGTAATAGTGCACCTATACGTCTTCATCGACGTTGTTTTCAACCGGAAG  
ATCTAGAGGTAACATCGAGACTTTGGACTATCCGGGCACATACTTCGCGAAAGGTTTCATGCATGTTTGTGGCCAGGGG  
CAACAAGATCAAGTTGG-----ATGGTAAAA---



AATTTATTTATCTCA-----GTTATTCCG-----CAAGAAGAAAAAGAAAA---AAC-----AAAGGG---  
TCTGTTGAATTTCAAGTATTCAATTTACCAATAAGATACGGAGACTTACTGCACATTTAGAATTTACAGAAAAGACTA  
TTTATCTCAGAGAGGTCTGCGAAAAATTCTGGGAAAACGTCAACGGCTGCTGGCTTATTTGTCAAAAAAAAAATAGAGTAC  
GTTATAAGGAATTA-----ATTGGTCAGTTGGATATTCGGGAGCCAAAAACTCGT-----  
ATGGTAAAACCTTCGTTTGAAACGATGTGGTAGAAAGCAACGAGCCATCTATCGAATCGTTGCGATTGATGTTTCGATCCCA  
AAGAGAAGGAAGAGATCTTCGTAAAGTGGGCTTTTACGATCCGATAAAGAATCAAACCTTATTCAAACGTTTCTGCTATTC  
TATATTTCTTGAAAA-----GGCGCTCAACCTACAGGAAGTTCATGATATTTCAAAGAAGGCAGAGGTCTTT---  
AAGGAA-----CTTCGA-----ATT-----AATCAA--ACGAAATCAAATAAATGA-----  
-----ATGGATAAA-----TCCAAGCGACCCTTTCGTAAATCCAAGCGATCTTTTCGT-----  
-----  
-----AGGCGTTTG---CCCCA---ATT---  
GGATCGGGGGATCGAATTGATTATAGAAATATGAGTTAATTAGTCGATTTATTAGTGAACAAGGAAAAATATTATCTAG  
ACGAGTGAATAGATTGACCTTGAAACAACAAGATTAATTACTATTGCTATAAAACAAGCTCGTATTTTATCTTCGTTAC  
CTTTTCTT---AAT-----AATGAGAAA-----  
-----  
-----  
-----CAATTTGAAAGAACCGAGTCGACCCCT-----AGAAGTCT-----GGTCTAAAACCGA-  
-----AATAAA-----  
-----GTGACGCGTTCA-----CTAAAAAA-----  
-----  
AATCCTTTTGTGGATAATCATTATTTGGGAAAAATTGAGAAGCTCAACATGAGGGAGGAGAAAGAGATAATAGTAACTTG  
GTCCCAGCATCTACCATTATACCCACAATGATAGGCCATACAATTGCTATTCATAATGGAAAAGCACATTTACCCATTT  
ATATAATAGATCGTATGGTGGGTCAAAATTGGGAGAATTGCGACCGACTCTGACTTTC---CGG-----GGACAC---  
-----  
GCGAGAAACAATAATGTATCTCGTCGT-----  
-----  
ATGATTTTGAATCTTTTCTACTAGGTAATCTATTATCCTTATGCATGAAGATAATC-----  
AATTCGGTCGTTGTGGTC-----  
GGACTCTATTATGGATTTCTGACCACATTCTCCATAGGGCCCTCTTATCTCTTCTTCTCCGAGCTCGGGTTATG-----  
----GAAGAAGGA-----ACCGAGAAGGAGGTATCAGCAACAAC---  
GGTTTTTACTGACAGCTCATGATGTTTCATATCGATCTATTATGCGCCTCT  
Eucalyptus  
GAAATGCGTTTGGATAACATCCTTTTCCGATTGGGTATGGCTTCGACTATTCTCAAGCCCGCCAATTAGTTAACCATAG  
ACATATTTTAGTTAATGGCTGTATAGTAGATATACCAAGTTATCGCTGCAAACCACGAGATATTATTACGGCGAGGGATG  
ATCAAAAATCGAGAGCTATGATTCAAAATTTTTGATTCATCCCCCATGAG-----  
GAAGTGCCAAAACATTTGACTCTT-----CACCCATTTCAA-----  
TATAAAGGATTAGTCAATCAAATAATCGATAGTAAATGGATCGGTTTGAAA---  
ATAAATGAATTGCTAGTCGTAGAATATTATTCTCGTCGACT-----  
ATGTCACGTCGAGGTACTGCAGAAGAAAAACTGCAAAATCCGATCCAATTTATCGTAATCGATTAGTTAACATGTTGGT  
TAACCGTATTCTGAAACACGGAAAAAATCATTGGCTTATCAAATTATCTATCGAGCCATGAAAAAGATTCAACAAAAGA  
CAGAAACAAATCCACTATCCGTTTTACGTCAAGCAATACGTGGAGTAACTCCCATATAGCAGTA-----  
AAAGCAAGACGT---  
GTAGGCGGATCGACTCATCAAGTTCCCATTGAAATAGGATCCACACAAGGAAAAGCACTTGCCATTGCTGGTTATTAGG  
AGCATCCCGAAAACGTCCGGGTGAAATATGGCTTTCAAATTAAGTTCCGAATTAGTGGATGCTGCCAAAGGGAGTGGCG  
ATGCC---ATACGCAAAAAGGAAGAGACTCATAGAATGGCAGAGGCAAAATAGAGCTTTTGCGCATTTTCGT-----  
---  
ATGGGTAGGGACACTATTGCTGACATAATAACCTCTATACGAAATGCTGACATGAATAGAAAAGGGACGATTCAAATAGC  
ATCCACTAACATC-----  
ACGAAAAACATTGTTAAATACTTTTAAAGAGAAGGTTTTATCAAAAACGTGAGGAAGCATCAGGAAAAACAACAAA-----  
-TATTTTTTGGTTTTAACCTACGACAT-----AGAAGGAATAGGAAAGGA-----CCCTATCGAACT-----ATT-  
-----  
TTAAATTTAAAACGTATCAGTAGGCCTGGCCTACGAATCTATTGAACTATCAACGAATTCCTAGAATTTTAGGCGGGAT  
GGGGATTGTAATCTTTTCTACTTCTCGAGGTATAATGACAGACCGAGAGGCTCGACTAGAAGGAATCGGCGGAGAAATTT  
TGTGTTATATATGG---ATGGCAAAATCTATACCAAGAAGTGGT---TCACGT-----  
AGGAATGTCGTTAGTGGTTCACGTAAAAGTACACGTAGA---

ATACCAAAGGGAGTTATTTCATGTTCAAGCAAGTTTCAACAATACCATTGTGACTGTTACAGATGTACGGGGTCGGGTAAT  
TTCTTGGTCCTCCGCCGGTACTTGTGGATTCAATGGTACAAGAAGGGGGACACCATTTGCTGCTCAAACCGCAGCAGGAA  
ATGCTATTTCGGACAGTAGTAGATCAA---  
GGTATGCAACGAGCAGAAGTCATGATAAAAAGGTCCTGGTCTCGGAAGAGATGCAGCATTAAAGAGCTATTCGTAGAAGTGG  
TATACTATTAAGTTTTCGTACGTGATGTAACCCCTATGCCACATAATGGCTGTAGACCTCCTAAAAAAGACGTGTG---  
ATGCCAACTATTAACAACCTTATTAGAAACACAAGACAGCCAATCAGAAATGTCACGAAATCCCCCGCTCTTGGGGGATG  
TCCTCAGCGTCGAGGAACATGTACTAGGGTGTAT-----  
ACTATCACCCCCAAAAACCAAACCTCTGCCTTACGTAAAGTTGCCAGAGTACGATTAACCTCTGGATTTGAAATCACTGC  
TTATATACCTGGTATTGGCCATAATTCACAAGAACATTCTGTAGTCTTAGTAAGAGGGGGGAAGGGTTAAGGATTTACCCG  
GTGTGAGATATCACATTGTTTCGAGGAACCCCTAGATGCTGTCTGGAGTAAAGGATCGTCAACAAGGGCGTTCTCAATATGGG  
GTCAAAAAGCCAAAA-----  
-----  
ATGGCAAGGAAAAGTTTTGATTTCAGAGGGGAGAAGAAGAGGCCAAAAACTGGAACAAAAATATCATTGATTTCGTGATCCTC  
AAAAAAGAAATA---AGCAAAGTTCGGTCGTTGAGT-----GAGAAATGG-----  
AAAATTCATGGAAAGTTACAATCCTCACCGCGTAATAGTGCCTACACGTCTTCATCGACGTTGTTTTTCGACCGGAAG  
ACCGAGAGCTAACTATCGAGACTTTGGGCTTTCCGGACACATACTTCGGGAAATGGTTCATGCATGTTTGTGGCCAGGGG  
CAACAAGATCAAGTTGG-----ATGGTAAAA---  
AATTCATTTCATCTCA-----GTTATTTCA-----CAAGAAGAAGAAAAAGAAGAAAAC-----AGGGGG---  
TCCATTGAATTTCAAGTATTTTCGTTTACCAATAAGATACGAAGACTGACTTCACATTTGGAATTGCACCGAAAAGATTA  
TTTATCTCAGAGAGGTTTACGTAAAATCCTGGGAAAACGCCAACGACTGCTGTCTTATTTGTCAAAGAAAAATAGAATAC  
GTTATAAAGAATTA-----ATTAGTCAGCTGGATATTCGGGAGTCAAAAACCTCGT-----  
ATGGTAAAACCTTCGTTTGAACGATGTGGTAGAAAGCAA---  
CCCGTTTATCGAATCGTTGCAATTGATGTCCGATCCCGAAGAGAAGGAAGAGATCTTCGGAAAGTGGGTTTTTATGATCC  
GATAAATAATCAAACGTATTTAAATATTCCTGCTATTCTATTTTTTCTTGAAAA-----  
GGTGTCAACCTACAGGAACGTGTTTATGATATTTTAAAGAAAGCGGGGTTTTCTTTTTAG-----  
-----  
ATGGAAAA-----TCCAAGCGACTCTTTCTTAAATCCAAGCGATCTTTTCGT-----  
-----  
-----AGGCGTTTG---CCCCG---ATC---  
CAATCGGGGGATCGAATTGATTATAGAAACATGAGTTAATTAGTCGATTTATTAGTGAACAAGGAAAAATATTATCTAG  
ACGGGTAAATAGATTAACCTTAAACAACAACGATTAATTACTATTGCTATAAAACAAGCTCGTATTTTATCTTTGTTAC  
CTTTTCTT---AAT-----AATGAGAAA-----  
-----  
-----CAATTTGAAAGAAGCGAGTCGACCGCC-----GGAGCTACT-----GGTCTTAGAACCATA-  
-----AATAAA-----  
-----GTGACACGTTCA-----CTAAAAAA-----  
-----  
AATCCTTTTGTAGCGAATCATTATTAAGAAAAATTGAGAAGCTTAACACAAAGGCGGAAAAAGAAATAATAAATACTTG  
GTCTCGGGCATCTACCATTATACCTACAATGATCGGTCATACTATTGCTATCCATAATGGAAGGGAACATTTACCTATTT  
ATATAACAGATCGTATGGTAGGCCATAAATTGGGAGAATTTTACCTACTATAAATTTT---CGT-----GGACAT---  
-----  
GCGAAAAATGATAATAGATCTCGTCGT-----  
-----  
ATGATTTTGAATCTTTTCTACTAGGGAATCCAGTATCCTTATGCATGAACATAATA-----  
AATTCGGTCGTTATGGTC-----  
GGACTCTATTATGGATTTCTGACCACATTCTCCATAGGGCCCTCTTATCTCTTCTTCTCCGAGCTCGGGTTCTG-----  
----GAAGAAGGAGAAGAAGGAACCGAGAAGAAGGTATCAGCAACAACG---  
GGTTTTATTGCGGGACAGCTCATGATGTTTCATATCGATCTATTATGCGCCTCT  
Ginkgo  
GAAATGCGTTTCGGATAATATTATTTTTCGATCGGGTATGGCCCTTACCATTCTGGAGCCAGACAATTAGTTAACCATAG  
ACATCTCCTGGTCAATGATCGTGTGGTAGATATACCAAGTTATCGTTGCAAACCCCAAGATGTTATTACTATAAGAGATC  
AACAAAGATCGAGAGCTATAATCAAAAACAATATCAATTTGTCCAGAGGGAT-----  
AAAATGCCAAATCATTGACTCTT-----CATTCGTCACAA-----  
TATAAAGGATTAGTCAATCGAATAATAGATAGTAAATGGATCAATTTGAAG---

ATTAATGAATTGCTGGTCGTAGAATATTATTCCCGT-----  
ATGTCACGCCGAAGTACTGCAGAAAAAGAACTGCAAAATCCGATCCAATTTATCGTAATCGATTTCATTAACATGTTGGT  
TAACCGTATTCTTAAACACGGAAAAAATCATTGGCTTATCGAATTTCTTATCGAGCCATGAAAAAGATTCAACAAAAGA  
CGGGAAAAAATCCACTATCTGTTTCACGCCAAGCAATACGTGGAGTAACTCCCGATGTAACAGTA-----  
AAAGCAAGACGT---  
GTAGGTGGATCGACTTATCAAGTTCCCATTGAAATCAGATCTACACAAGGAAAAGCACTTGCCATTTCGTTGGTTATTAGG  
GGCATCTCGAAAACGTCCGGGTCGAAATATGGCTTTCAAATTGAGTTACGAATTAATGGATGCTGCCAGAGAGAATGGCA  
ATGCT---ATACGCAAGAAGGAAGAGACTCATAGAATGGCAGAGGCCAATAGAGCTTTTGCACATTTCCGT-----  
-----  
GGTAACGATGCTATCGCCAATCTAATTACTTCTATAAGAAACGCTGACATGGTAAAAAAGAGCAGTTCGGGTACCAGC  
TACTAATATC-----  
ACCAGAAACATTGGAAGGATCCTTCTACGAGAAGGTTTTATAGAAGATGTTAGAGAACATCGGGAAGGTCGAAAA-----  
-TATCTTTTGATTATAACTCTAAGATAT-----AGAGGAAGGAAGGGAAAT-----ACATATATAACC-----ACT-  
-----  
TCGGAACGTACTAGTAAACCTGGTCGGAGGATCTATTCTAATTATCAAGAGGTTTCTAAAGTTTTGGGTGGGATGGGGGT  
CGTAATTGTTTCTACTTCTCAAGGAATTATGACGGATCGAGAGGCTCGACGAAAAGGAATTGGGGGGGAAATATTCCGCT  
ATGTATGG---ATGTCAAACCTACAAGAAGAATTGGT---TCGCGT-----AGAAAT---  
-----GAACGTAGA---  
ATACCCAAAGGAGTTATTCATATCCAAGCAAGTTTTAACAATACCATTGTTACTGTTACAGATGTACGGGGACAAGTGGT  
TTCTTGGTCTTCTGCTGGTGCCTGTGGATTTAAAGGCACAAAGAGAAGTACACCATTTGCTGCTCAGACTGCAGCAGAAA  
GTGCTATTCGTACGTTAATGGATCAG---  
GGTATGGAACGAGCAGAAGTTATGATAAGTGGTCCCTGGTCCGGGGAGAGATACAGCATTACGAGCCATTTCGTAGAAGTGG  
TATACTACTCAGTTTTGTACGTGATGTAACCCCTATGCCGCATAATGGATGTAGACCTCCCAAAAAGAGACGTGTG---  
ATGCCAACTATTCAACAACCTATTAGAAATGCGAGACAGCCAATAGAAAATGGGACAAAATCTCCCGCTCTTCGAGGATG  
TCCTCAGCGTAGAGGAGTCTGTACTAGGGTGTAT-----  
ACTACCACCCCAAAAAACCAACTCTGCCTTACGTAAAGTTGCCAGAGTACGATTAACCTCCGGATTTGAAATCACTGC  
TTATATACCTGGTATTGGCCATAATTTACAAGAACATTCTGTAGTATTAGTAAGGGGAGGAAGGGTTAAAGATTTACCCG  
GTGTGAGATATCACATTGTTTCGAGGAACCCTAGATGCTGTTGGAGTAAAAGATCGTCAACAAGGGCGTTCTCAATATGGA  
GTA AAAAAGCCGAAA-----  
-----  
ATGGCAAGAAAAAGTATCATTAGAGAGAGAAAAAGAGACAAAAATTGGAACGGAATATCATTGATTTCGTCAATCTCC  
GGAGAGAGAGATA---AGCGAAGTTTCATCATTGGAT-----GAAAAATGG-----  
GAAATTCATAGAAAATTGCAATCTCCACCGCGTAATAGTGCACCTACACGTCTTCATCGACGTTGTTCTCCAACCTGGAAG  
ACCTAGAGCCAACCTATCGAGATTTTGGTCTGTCCGGACATGTACTCCGTAGGATGGCTCACGCATGTTTGTGCCCCGGA  
TGAAAAAATCGAGTTGG-----ATGACGAAA---  
AATTCGTCCCTTCGTTTCATCTTTGATTTCTGGGGAACAG-----AGAGAA---  
TCTGTTGAATCTCAGGTATATTGTTAACTAGGCGAATTCTGAGACTTACCCATCATTGGAATGCACAGAAGAGATTA  
TTCATCTCGAAGAGGTTTGGCGCAAATTTGGGAAAGCGTAAGCGACTTCTGGTTCAATTTGTCCAAGAGAGATATACTTC  
GTTACGATGATTCA-----ATTAATCAATTAGGTCTTCGTGGGCTAAAAACCCGT-----  
-----  
-----ATGAAACAACTATGAATCAATCTAAGCGATCTTTTCGT-----  
-----  
-----AGACATTTG---CCACCG---ATT---  
AGATCGGGGGATCAGATCGATCATAAAAAATATGAGCTTAATTAGTCGATTTCGTTAGCGAACAGGGAAAAATATTATCCAG  
GCGAGTGAATAGATTGACCTCGAAACAACAACGCCTAATGACTATTGCTATTAACGAGCTCGTATTCTATCTTCGTTAC  
CTTTTCTT---AAT-----AATGACAAC-----  
-----  
-----CAATTCGATCCC-----  
-----  
-----ATGGCACGTTCA-----CTCAGAAAA-----  
-----

AATCCTCTTGTAGCTAACCATTCATCGAAAAAATTGAAAATCTCAACATTAATAAATGAAAAGGAGATAATAGTAACCTG  
GTCCCGGGCATCTACCATTGTACCCGCAATGATTGGCCATACAATTGCTGTTTATAATGGAAAGGAACATTTACCTATTT  
ATGTAACAGATCGTATGGTAGGTCACAAATTGGGGGAATTTGCACCTACTCAAATTTTC---CGG-----GGACAC---

-----  
GTGAGAAACGATAAGAAATCTCGTCGT-----  
-----  
-----  
-----

Glycine

GAAATGGCCTTGGATAACATACTTTTTCGGTTGGGTATGGCTGCGACTATTCTCAAGCAGCCAATTAATTAACCATAG  
ACATGTTTTAGTTAATGGTCATATAGTGGATATACCAAGTTATCGTTGCAAACCTCAAGATATTATTACAGCGAAGGATG  
AACAAAAATCGAAAATCTGATTCAAATTTATCTTGATTGAGCCCCCGTGAG-----

AAATTGCCAAATCATTGACTCTT-----CACCCATTCCA-----

TATAAAGGATTAATCAATCAAATAATAGATAATAAATGGGTTGGTTTGAAA---

ATAAATGAATTACTAGTTGTAGAATATTATTCTCGTCAGACT-----

ATGTCACGGCGAGGTACTGCAGAAGAAAAAACCGCAAAATCCGATCCAATTTATCGTAATCGATTAGTTAACATGTTGGT  
TAACCGTATTCTGAAACACGGAAAAAATCATTGGCTTATCAAATTTATCTATCGAGCTATGAAAAAGATTCAACAAAAGA  
CAGAAACAAATCCACTATCTGTTTTACGTCAAGCAATACGTGGAGTAACTCCCGATATAGCAGTA-----

AAAGCAAGACGC---

GTAGGCGGATCAACTCATCAAGTTCCCGTTGAAATAGGATCCACACAAGGAAAAGCACTTGCCATTGCTTGGTTATTGGG  
GGCATCCCGAAAACGTCCGGGTCGAAATATGGCTTTCAAATTAAGTTCCGAATTAGTGGATGCTGCCAAAGGTAGTGGCG  
ATGCC---ATACGCAAAAAGGAAGAGACTCATAGAATGGCAGAGGCAATAGAGCTTTTGCACATTTTCGT-----  
---

ATGGGTAAGGACACCATCGCTGACATAATAACCTATATAAGAAATGCTGACATGAATAAAAAAGGAATGGTTCAAATACC  
ATTTACTAACATA-----

ACAGAAAACATTGTAAAAATACTTTTACGCGAGGGTTTTGTTGAAAACGTCAGAAAACATAGAGAAAACGACAAA-----

-TATTTTTTAGTTTTAACTCTACGGTAT-----AGAAGGAATAGAAAAGGA-----TCATATAAAAAGT-----TTT-  
-----

TTAAATTTAAAACGGATCAGTACACCCGGTCTACGAATATATTCTAATTATCAACGAATCCCTCGAATTTTTAGGGGGCAT  
GGGGATTGTAATTTCTTTCAACTTCTAGAGGTATAATGACAGATCGAGAGGCTCGATTAGAAAAGAAATTGGCGGAGAAGTTT  
TATGTTATATATGG---ATGGCAAAACCTATATCTAAAAGGGT---TCGCGT-----

AAAAATGTACGTATTGGTTCGCGTAAGCATACTCGTAAA---

ATACCAAAGGGAGTTATTCATGTTCAAGCTAGTTTTCAACAATACTATTGTAAGTGTACAGATGTACGAGGTGGGTGAT  
TTCTTGGTCTCCGCCGGTACTTGCAGGATTCAAAGGTACACGAAGGGGGACACCTTTTGCCGCTCAAACCTGCAGCAGGAA  
ATGCTATTCGAACAGTATCGGATCAA---

GGCATGCAACGAGCAGAAGTCATGATAAAAGGTCTGGTCTCGGAAGAGATGCGGCATTAAGAGCTATTTCGTAGAAGTGG  
TATACTATTAATTTTTATACGAGATGTAACCTCTATGCCACATAATGGATGTAGATCTCCTAAAAAAGACGTGTG---

ATGCCAACTATGAAACAACCTATTAGAAAACACAAGACAGCCAATCCGAAACGTCACAAAATCCCCAGCTCTTCGGGGATG  
CCCTCAGCGCCGAGGAACGTGTACCAGGGTGTAT-----

ACTATTACCCAAAAAACCAACTCTGCTTTACGTAAAGTTGCCAGAGTACGCTTAACCTCTGGATTTGAAATTAAGTGC  
TTATATACCCGGTATTGGCCATAATTTACAAGAACATTCTGTAGTCTTAGTAAGAGGGGGGAGGGTTAAAGATTTACCCG  
GTGTGAGATATCACATTGTTTCGAGGAACCCTAGATGCTGTGCGAGTAAAGGATCGTCAACAAGGGCGTTCTAAATATGGG  
GCCAAAAAGCCAAAA-----  
-----

ATGGCAAGGAAAAGTGTGATTAGAGGGGAGAAGAAGAGACAAAAAATTGGAACAGAAATATCATTGATTGCGCCGATCCTC  
AAAAAAGAAATA---AGCAAAGTTCGGTCGTTAAGT-----GATAAATGG-----

AAAATTCATGAAAATTAGAATCACTACCGCGTAATAGTGCACCTATACGCTTTCATCGACGTTGTTTTTCGACCCGGAAG  
ACCGCGAGCTAATTATCGAGACTTTGGATTATCCGGACACATACTTCGTGAAATGGTTCATGCATGTTTATTGCCCGGTG  
CAACAAGATCCAGTTGG-----ATGGTAAAA---

AATTCAATTATACCT-----GTTATTTCA-----CAAGAAAAAAGAAAAA---AAC-----CCAGGA---

TCGGTTGAATTTCAAATATTCAAATTTACCGATAGAATACGAAGACTTACTTCACATTTTGAATTGCACCGAAAAGACTA  
TTTATCTCAAAGAGGTTTACGTAAAATTTGGGAAAACGACAAAGATTGCTGTCTTATTTGTCAAAGAAAGATAGAATAC  
GGTATAAAAAATTA-----ATAAATCAGTTTGTATTCGAGAGTCACAAATTCGT-----

ATGGTAAAACCTCGTTTTGAAACGATGTGGTAAAAAGCAACGAGCCGTTTTATCGAATCGTTGCAATCGATGTTTCGATCTCG  
AAGAGAGGGAAGAGATCTTCGAAAAGTGGGTTTTTATGATCCAATAAAGAATCAAACCTATTTAAATATTCTGTTATTC

TATATTTCTTGAACGA-----GGCGCTCAACCTACAGGAAGTTCAGGACATTTCAAAAAGGGCTGGTGTTTTT---  
ATGGAA-----CTTAGC-----TCG-----AATCAACAAACGAAATTCATTAA-----  
-----ATGGAAAA-----TCTAAGCGACTCTTTATGAAATCCAAGCGATCTTTTCGT-----  
-----AGGCGTTTG---CCCCG---ATC---  
CAATCGGGGGACCGAATTGATTATAAAAACATGGGTTTAATTAGTCGATTTATTAGTGAACAAGGAAAAATATTATCCAG  
ACGCGTAAATAGATTGACCTTAAACAACAACGATTAATAACAATTGCTATAAAACAAGCTCGTATTTTATCTTCGTTAC  
CTTTTCTT---AAT-----AATGAAAA-----  
-----  
-----CAATTTGAAAAAGCGAGTCAACCGCT-----AGAACTACTACT-----TTAAGAAAAAAA-  
-----AAATATAGAAAT-----GTGACACGTTCA-----CTAAAAAAA-----  
-----  
AATCCTTTTGTAGCGAATCATTATTAAGAAAAATAAATAAACTTAACACAAAAGCGGAAAAAGATATAATAAATAACTTG  
GTCCAGAGCATCTACCATTATACCTACAATGATTGGCCATACCATTGCTATCCACAACGGAAAAGAGCATTACCTATTT  
ATATAACAGATCGTATGGTAGGCCATAAATTAGGAGAATTTTACCTACTCTAAATTTT---CGA-----GGACAT---  
-----  
GCGAAAAATGATAATAGATCTCGTCGT-----  
-----  
ATGATTTTTCAATCTTTTATACTGGATAATCTAGTATTCTTATGCATGAAGATAATT-----  
AATTCGATAGTTGTGGTC-----  
GGACTCTATTATGGATTTCTGACCACATTTTCCATAGGGCCCTCTTATCTCTTCTTCTTCGAGCTAGGCTTGTG-----  
----GAAGAAGG-----ACCGAGAAGAAAATATCAGCAACAACT---  
GGGTTTATTACGGGACAGCTCATAATGTTTCATATCGATCTATTATGCGCCTTT  
Gossypium  
GAAATGCGGTTGGATAACATCCTTTTTTCGATTGGGTATGGCTTCGACTATTCTCAAGCCCCTCAATTAGTTAACCATAG  
ACATATTTTAGTTAATGGGCGTACAGTAGATATACCAAGTTATCGCTGCAAACCCCGAGATATTATTTTCAGCGAGGGATG  
AACAAAAATCTAGAACTCTGATTCAAATTTATCTTGATTCATCCACCAATGAG-----  
GAATTACCAAACATTTGACCTTT-----CACACATTACAA-----  
TATAAAGGATTAGTCAATCAAATAATAGATAGGAAATGGGTTGGTTTGAAA---  
ATAAATGAATTGCTTGTGCTAGAATATTATTCTCGTCAGACT-----  
ATGTCACGTCGAGGTACTGCAGAAGAAAAAACTGCAAAATCCGATCCAATTTATCGTAATCGATTAGTTAACATGTTGGT  
TAACCGTATTCTGAAACACGGAAAAAAATCATTGGCTTATCAAATTTATCTATCGAGCCTTGAAAAAGATTCAACAAAAGA  
CAGAAACAAATCCACTATCTGTTTTACGTCAAGCAATACGTGGAGTAACCTCCCATATAGCAGTA-----  
AAAGCAAGACGT---  
GTAGGCGGATCGACTCATCAAGTTCCCATTGAAATAGGATCCACACAAGGAAAAGCACTTGCCATTGCTTGGTTATTAGG  
GGCATCCCGAAAACGTCCGGGTGCAAAATATGGCTTTCAAATTAAGTTCCGAATTAGTGGATGCTGCCAAAGGGAGTGGCG  
ATGCC---ATACGCAAAAAGGAAGAGACTCATAGAATGGCAGAGGCAATAGAGCTTTTGCACATTTTCGT-----  
-----  
ATGGGTAAGGACACTATTGCTGACATAATAACCTCTATACGAAATGCTGATATGAATAGAAAAGGAACGATTCAAATAGG  
ATCTACTAACATC-----  
ACTGAAAACATTGTTAAAATACTTTTACGAGAAGGTTTTATCGATAACGTAAGGAAACATCGGGAACGCAACAAA-----  
-TATTTTTTGGTTTTAACCTACGACAT-----AGACGGAATAGAAAAGGA-----CCACATAGAACT-----ATT-  
-----  
TTAAATTTACGACGGATCAGTCGACCAGGTCTACGAATCTATTCTAACTATCAACAAATTCCTAGGATTTTAGCGGGAT  
GGGATTGTAATCTTTCTACTTCTCGGGTATAATGACAGACCGGGAGGCTCGACTAGAAGGAATCGGTGGAGAAATTT  
TGTGTTCTATATGG---ATGGCAAACCTATACCAAAGTTGGT---TCACGT-----  
AGGAATGGGCGCAGTAGTGCACGGAAAAGTGCACGTAGA---  
ATACCAAAGGAGTTATTCATGTTCAAGCAAGTTTCAACAATACCATTGTTACTGTTACAGATGTACGGGGTGGGTAAT  
CTCTTGGTCTCCGCCGCACTTGTGGATTCAAGGGTACAAGAAGGGGACCCTTTTGTGCTCAAACCGCAGCGGGAA  
ATGCTATTTCGAGCAGTAGTAGACCAA---  
GGTATGCAACGAGCGGAAGTTATGATAAAGGGTCTGGTCTCGGAAGAGATGCAGCATTACGAGCTATTTCGTAGAAGTGG  
TATACTATTAAGTTTTCGTACGGGATGTAACCCCTATGCCACATAATGGCTGTAGACCTCTAAAAAAGACGTGTG---  
ATGCCAACTATTAACAACCTATTAGAAATGCAAGACAGCCAATTAGAAATGTCACGAAATCCCCTGCTCTTGGGGGATG

TCCTCAGCGCCGAGGAACATGTACTAGGGTGTAT-----  
ACTATCACCCCCAAAAACCAAACCTCTGCCTTACGTAAAGTTGCCAGAGTACGATTAACCTCTGGGTTTTGAAATCACTGC  
TTATATACCTGGTATTGGCCATAATTACAAGAACATTCTGTAGTCTTAGTAAGAGGGGGGAAGGGTTAAGGATTTACCCG  
GTGTGAGATATCACATTGTTTCGAGGAACCCTAGATGCTGTCCGAGTAAAGGATCGTCAACAAGGGCGTTCTAAATATGGG  
GTCAAAAAGCCAAA-----

ATGGCAAAGAAAAGTTTGATTCATAGGGAGAAGAAGAGGCCAAAAATTGGAACAAAAATATCATTGATTGTCGATCCTC  
AAAAAAGAAATA--AGCAAAGTTCGGTTCGTTGAGT-----GAGAAATGG-----  
AAAATTCATGGAAAGTTACAATCCTCACCACGAAATAGCGCACCCACACGTCTTCATCGACGTTGCTTTTTCGACCGGAAG  
ACCGAGAGCTAACTATCGAGACTTTGGACTATCCGGACACATACTTCGTGAAATGGTTCACGCATGTTTGTGGCCGGGG  
CAACAAGATCAAGTTGG-----ATGGTAAAA---  
AATTCATTCATCTCA-----GTTATTTTT-----CAAGAAAAAAGAAGAA---AAC-----AGGGGG---  
TCTGCTGAATTTCAAATAGTTAGTTTACCAATAAGATACGAAGACTTACTTCACATTTGGAATTGCACAAAAAGACTA  
TTTATCTCAGAGAGGTCTACGTAAAATTCTAGGAAAACGTCAACGACTGCTATCTTATTTATCAAAGACAAATAAAATAC  
GTTATAAAGAATTA-----ATTGGTGAGTTGGATATTCGGGAATCAAAAAATCGT-----  
ATGGTAAAACCTTCGTTTGAACGATGTGGTAGAAAGCAACGAGCCGTTTATCGAATCGTTGCAATTGATGTTTCGATCCCG  
AAGAGAGGGAAGAGATCTTCGAAAAGTGGGTTTTTATGATCCGATAAATAATCAAACCTATTTAAATGTTCCCGCCATT  
TCTATTTCTTGAAAA-----GGAGCTCAACCCACAGCAACTGTTTCATGATATTTTAAAGAAGGCGGGGGTTTTT---  
ACAGAA-----CTTACT-----CTT-----AATCAA---ACAAAATTCATTAA-----  
-----ATGGATAAA-----TCCAAGCGACTCTTTCTTAAATCCAAGCGATCTTTTCGT-----

-----AGGCGTTTG---CCCCG---ATC---  
CAATCGGGGGATCGAATTGATTATAGAAACATGAGTTAATTAGTCGATTTATTAGTGAACAAGGAAAAATATTATCTAG  
GCGAGTAAATAGATTGACCTTAAACAACAACGATTAATTACTATTGCTATAAACAAGCTCGTATTTTATCTTCGTTAC  
CCTTTCTT---AAT-----AATGAGAAA-----

-----CAGTTTGAAAGAAGCGAGTCGACCACT-----AGAACTACT-----GCTCTTAGAACCAGA-  
-----AATAAA-----ATGGCGCGTTCA-----CTAAAAAA-----

AATCCTTTTGTAGCAAATCATTATTTAAAAAATCGAAAGGCTTAATACAAAAGCGGAAAAAGAAATAATAAATACTTG  
GTCCAGAGCATCTACCATTATACCCACAATGATCGGCCATACTATCGCTATCCATAATGGAAAAGAACATTTGCCCATTT  
ATATAACGGATCGTATGGTAGGACATAAATTGGGAGAATTTCGCACCTACTATAAATTTT---CGC-----GGACAC---

GCAAAAAATGATAATAAATCTCGTCGT-----

ATGATGATTTTTAAATCTTTTATACCAGGGAATCTAATATCCTTATACATGACGATAATC-----  
AATTCGGTTCGTTATGGTC-----  
GGACTCTATTATGGATTTCTGACCACACTATCCATAGGTCCCTCTTATATCTTCTTCTACGAGCTCGGTTTATG-----  
----GAAGAAGGAGAAGAAGGAACCGAGAAGAGAGTATCAGCAACAACT---  
GGGTTTATTGCAGGCCAGCTCATGATGTTTCATATCAATCTACTATGTACCTCT

Helianthus

GAAATGCGCCTGGATAACATCCTTTTTTCGGTTGGGTATGGCTCCGACTATTCCGGGAGCTCGCCAATTAGTTAACCATAG  
ACATATTTTAGTCAATGGTCGTATAGTAGATATACCAAGTTATCGCTGCAAACCCGAGATACTATTGCGGCGAGGGATG  
AACAAAAATCTAGAGCTCTAATTCAAATTTCTCTCGATTTCATCCCTCCTGAG-----  
GAATTGCCAAACCATTTGACTCTT-----CAACCATTCAA-----  
TATAAAGGATTAGTCAATCAAATAATAGATAGTAAATGGGTTCGGCTTGAAA---  
ATAAATGAATTGCTAGTGGTAGAATATTATTCTCGTCAGACTTAA-----  
ATGTCACGTCGAGGACTGCAGAAGAAAAAATGCAAAATCCGATCCAATTTATCGTAATCGATTAGTTAACATGTTGGT  
TAACCGTATTCTGAAACACGGAAAAAATCATTGGCTTATCAAATTATCTATCGAGCCGTGAAAAAGATTCAACAAAAGA  
CAGAAACAAATCCACTATCTGTTTTACGTCAAGCAATACATGGAGTCACTCCGGGTATAGCAGTA-----  
AAAGCAAGACGT---

GTAGGTGGATCGACTCATCAAGTTCCCATTGAAATAGGATCCACACAAGGAAAAGCACTTGCCATTGTTGGTTATTAGC  
GGCATCCCGAAAACGTCCGGGTGCAAAATATGGCTTTCAAATTAAGTTCCGAATTAGTGGATGCTGCCAAAGGGAGTGGCG

ATGCC---ATACGCAAAAGGGAAGAGACTCATAGAATGGCAGAGGC AAAATAGAGCTTTTGCACATTTTCGTTAA-----  
---  
ATGAGTAGTGATACTATTGCTGACATAATAACCTCTATACGAAATGCCGATATGTATAGAAAAAGCGTGGTTTCGAGTAGC  
ATCTACTAATATC-----  
AGCCAAAGTATTGTTAAAATACTTTTACGAGAGGGTTTTATCGAAAACGTGAGAAAACATCGAGAAAACAACAAA-----  
-GATTTTTTGGTTTTAAACCCTACGACAT-----AGAAGGAATAGGAAAAGG-----CCTTATCGAAAT-----CTT-  
-----  
TTAAATTTAAAACGGATCAGTCGGCCGGGTCTACGAATCTATTCTAACTATCAAAGAATTCCTAGAATTTTAGGCGGGAT  
GGGAGTTGTAATTCCTTTCTACCTCTCGGGGTATAATGACAGACCCGGGAGGCTCGACTAGAAAAGAATAGGCGGAGAAATTT  
TGTGTTATATATGGTAAATGGCAAAGCTATACCGAAAAGGGT---TCACGT-----  
---GGACGTATTAGTTTCGCGTAAGAGTATACGTAAA---  
ATACCAAAGGGGGTTATTTCATATTCAAGCAAGTTTTCAATAATACCATTGTGACTGTTACAGATGTACGAGGGCGAGTGGT  
TTCTTGGTCCTCTGCCGGTACTTGTGGCTTCCAAGGTACAAGAAGAGGGACGCCGTTTGCTGCTCAAACCGCAGCGGCAA  
ATGCTATTCGTGCAGTAGTAGATCAA---  
GGTATGCAACGAGCAGAAGTCATGATTAAAGGTCCCGGTCTTGGAAGAGACGCAGCATTACGAGCTATTCGAGAAAGTGG  
TATACTATTAACCTTCGTACGGGATGTAACCCCTATGCCACATAATGGCTGTAGACCCCGAAAAAAGACGTGTGTAGA  
TGCCAACGATTAACAACCTTATTAGAAATACAAGACAGCCAATTAGAAATGTCACAAAATCCCCCGCGCTTCGGGGATGC  
CCTCAGCGTCGAGGAACATGTACTAGGGTGTAT-----  
ACTATCACCCCCAAAAACCAAACCTCTGCCTTACGTAAAGTTGCCAGAGTACGATTAACCTCTGGATTTGAAATCACTGC  
TTATATACCCGGTATTGGCCATAATTCACAAGAACATTCTGTAGTCTTAGTAAGAGGGGGGAGGGTTAAGGATTTACCCG  
GTGTGAGATATCACATTGTTTCGAGGAACCCTAGATGCTGTGCGAGTAAAGGATCGTCAACAAGGGCGTTCT-----  
-----AGTGC GTTGTAG-----  
-----  
ATGGCAAAAAAAGTTTTGATTGAGAGGGAAAAGAAGAGGC AAAAATTGGAACAGAAATATCATTGATTGTCGATCCTC  
AAAAGAAGAAATA---AGCAAAGTTCGATCATTGAGT-----GACAAATGG-----  
GAAATTTATGGAAAGTTACAATCCCCACCGCGGAATAGTGCACCTACGCGGCTTCATCGACGTTGTTTTTCAACTGGAAG  
GCCAAGAGCTAACTACCGAGACTTTGGACTATCCGGACACATACTTCGTGAAATGGTTCATGCATGTTTGTGCCAGGGG  
CGACAAGATCGAGTTGGTAA-----ATGGTAAAA---  
AATTCATTTATTTCC-----ATTATTTTGAAGAACAAGAAGAAAACAAAGAA---AAC-----AGAGGA---  
TCTGTTGAATTTCAAGTAGTAAGTTTCACCAATAAGATACGGAGACTTACTTCACATTTGGAATTGCACAAAAAAGACTA  
TTTATCTCAGAGAGGTCTGCGGAAAATTCTGGGAAAACGTCAACGGTTGCTGGCTTATTTGTCAAAAAAATAGAGTGC  
GTTATAAAGAATTA-----ATAGGGCAGTTGGATATTCGAGAAAAGAAAACCTCGTTAA-----  
ATGGTAAACTTCGTTTTAAACGATGTGGTAGAAAGCAACGA-----  
ATCGTTGCAATTGATGTTTCGATCTCGAAGAGAAGGAAGAGATCTTCGAAAAGTGGGTTTTTATGATCCTATCAAGAATCA  
AACTTATTTAAACGTTCCCGCGATTCTCTATTTCTTGAAG---  
GGCGCTCAGCCTACAGGAACGTGTTTCAGGATATTTTAAAAAAGGCAGAGGTTTTT---AAGGAA-----  
CTTGGC-----CCT-----AATCAA---ACGAAATTC AATTAA-----  
ATGGATAAA-----TCCAAGCGAACTTTTCTTAAATCCAAGCGATCTTTTCGT-----  
-----  
-----AAGCGTTTG---CCCCG---ATC---  
CAATCGGGGGATCGAATTGATTATAAAAACATGAGTTTAATTAGTCGATTTATTAGTGAACAGGGAAAAATATTATCTAG  
ACGAGTAAATAGATTGACCTTGAAACAACAACGATTAATTACTATTGCTATAAAAACAAGCTCGTATTTTATCTTTGTTAC  
CTTTTCTT---AAT-----AATGAGAAA-----  
-----  
-----CAATTTGAAAGAACCGAGTCGACCACT-----AGA ACTCCT-----AGTCTTAGAGCCAGA-  
-----AAAAGATAG-----  
-----GTGACACGTTCA-----CTCAAAAA-----  
-----  
AATCCTTTTGTAGCGAATCATTATTTAAAAAATAAATAAGCTTAAACACAAAAGAAGAAAAAGAAATCATAATAACATG  
GTCCCGGGCATCTACCATTATAACCATAATGGTCGGCCATACTATTGCTATCCATAATGGAAAGGAACATTTACCTATTT  
ATATAACAGATCGTATGGTAGGACACAAATTTGGGAGAATTTGCGCCTACTTTAAATTTT---CGA-----GGACAT---  
-----  
GCAAAAAGCGATAATAGATCTCGTCGTTAA-----  
-----

ATGATTTTGAATCTTTTCTACTAGGTAATCTAGTATCCTTATGCATGAAGATAATC-----  
AATTCGGTCTGTTGTGGTC-----  
GGACTCTATTATGGATTTCTGACCACATTCTCCATAGGACCCTCCTATCTCTTCTTCTCCGAGCTCACGTTATG-----  
----GAAGAAGGAGAAGAAGGAGCCGAGAAGAAGGTATCAGCAACAACACT---  
GGTTTTATTACGGGACAGCTCATAATGTTTCATATCGATCTATTATGCGCCTCT  
Illicium  
GAGATGCGTTTTGGATAACATCCTTTTTTCGATTGGGTATGGCTTCGACCATTCTGGAGCCAGACAATTAGTTAACCATAG  
ACATATTTTAGTTAATGGTCGTCTAGTAGATATACCAAGCTATCGCTGCAAACCCCGAGATATTATTACTACGAGGGATG  
AACACAGATCCAGAGCTCTGATTCAAAATTCTATTGATTCATCCCAAAAAGAG-----  
GAATTGCCAAAACATTTGACTCTT-----  
CACTCATTGCAATATCAATATAAAGGGTTAGTAAATCAAATAATAGATAGTAAATGGGTCTGTTTTGAAA---  
ATCAATGAATTGCTAGTCGTAGAATATTATTCCCGTCAGACT-----  
ATGTCACGTCGAGGTACTGCAGAAGAAAAAACTGCAAAATCCGATCCAATTTATCGTAATCGATTAGTTAACATGTTGGT  
TAACCGTATTCTGAAACACGGAAAAAAATCATTGGCTTATCAAATTATCTATCGAGCCGTAAAAAAGATTCAACAAAAGA  
CAGAAACAAATCCACTATCTGTTTTACGTCAAGCAATACGTGGAGTAACTCCCGATATAGCAGTA-----  
AAAGCAAGACGT---  
GTAGGCGGATCGACTCATCAAGTTCCCATTGAAATAGGATCTACACAAGGAAAAGCACTTGCCATTCTGTTGGTTATTAGG  
GGCATCCCGAAAACGTCCGGGTGCAAAATATGGCTTTCAAATTAAGTTCCGAATTAGTGGATGCTGCCAAAGGGAGTGGCG  
ATGCC---ATACGCAAAAAGGAAGAGACTCATAGAATGGCAGAGGCCAATAGAGCTTTTGCACATTTTCGT-----  
---  
ATGGGTAGGGATACTATTGCCGATATAATAACTTCTATAAGAAATGCTGACATGGGTACAAAAGGAATGTTTGAATAGC  
ATCTACTAATATC-----  
ACGGAAAATATTGTTAAAATACTTCTACGAGAAGGTTTTATTGAAAACGTTAGGAAACATCGGGAAAGCAACAAA-----  
-TATTTCTTGGTTTTCAACCCTGCGGCAT-----AGAAGAAATAGGAAAGGA-----ACATATAGAAAT-----ATT-  
-----  
TTAAAGCGTATCAGCAGACCCGGTCTACGAATTTATTCAAACATCAAGGAATCCTAGGATCTTAGGTGGAATGGGGGT  
TGTAATTTCTTTCTACTTCTCGAGGTATAATGACAGATCGAGAAGCTCGACTAGAAGGAATTGGAGGAGAAAATTTGTGTT  
ATATATGG---ATGACAAAACCTATACCAAGAATTGGT---TTACGT-----  
AGGAATGGACGTATTGGTTTTACGTAAGAATGGACGTAGA---  
ATATCAAAGGAGTTATTTCATGTTCAAGCGAGTTTCAAACAATACCATTGTGACTGTTACAGATGTACGGGGTGGGTTGT  
TTCTTGGTCTCCGCGGGTACTTGTGGATTGAGAGGCGCAAGAAGAGGGACACCATTTGCTGCTCAAACCGCAGCAGGAA  
ATGCTATTTCGTACAGTAGTGGATCAG---  
GGTATGCAACGAGCAGAAGTTATGATAAAGGGCCCCGGTCTCGGAAGAGATGCAGCATTACGAGCCATTTCGTAGAAGTGG  
TATACTATTAAGTTTTCGTACGTGACGTAACCTCTATGCCACATAATGGATGTAGACCGCCTAAAAAAGGCGCGTA---  
ATGCCAACTATTAACAACCTTATTAGAAACACAAGACAGCCAATCAAAAATGTCACGAAATCCCCCGCTCTTCGAGGATG  
TCCTCAGCGTAGAGGAACATGTACTAGGGTGTAT-----  
ACTATCACCCCCAAAAAACCAACTCTGCCTTACGTAAAGTTGCCAGAGTACGATTAACCTCTGGATTTGAAATCACTGC  
TTATATACCTGGTATTGGCCATAATTCACAAGAACACTCTGTAGTATTAGTAAGAGGGGGAAGGGTTAAGGATTTACCCG  
GTGTGAGATATCACATTGTTTCGAGGAACCTAGATGCTGTCGGAGTAAAGGATCGTCAACAAGGGCGTTCTAAATATGGG  
GTCAAAAAGCCAAA-----  
-----  
ATGGCAAGGAAAAGTTTTGATTGAGAGGGAGAGGAAGAGAGATAAATTGGAACAGAAATATCATTGATTTCGTGATCCTC  
AAAAAACAAATA---AGCAAAGTTCATCGTTGAGT-----GATAAATGG-----  
GAAATTCATGGAAAATTGCAATCCCCACCAGTAATAGTGCACCTATACGTCTTCATCGACGTTGTTTTTTGACCGGAAG  
ACCTAGGGCTAACTATCGAGACTTTGGGCTATCCGGACATGTACTTCGCGAAATGGTTCATGCATGTTTGTGCGGGGG  
CAACAAGATCAAGTTGG-----ATGGTAAAA---  
AAATCGTTTCATCTTA-----GTTATTCCG-----CAAGAGGAA-----AAG-----AAAGGG---  
TCTGTTGAATTTCAAGTATCCAGTTTACCAATAAAAATACGGAGACTTACTTCACATTTGGAATTGCACAGAAAAGACTA  
TTTATCTCAGAGAGGTCTGCGGAGAATTCTTGGAAAACGTCAACGGTTGCTGGCTTATTTGTCAAAGAAAAATCGAGTAC  
GTTATAAGGAATTA-----ATCAGTCAGTTGGATATTTCGTGAGCCAAAGACTCAT-----  
-----  
-----ATGGATAAA-----TCTAAGCGAACTTTTCGTAAATCCAAGCGATCTTTTCGT-----  
-----  
-----AGGCGTTTG---CCCCA---ATT---



GGATCGGGGGATCGAATTGATTATAGAAACATGAGTTTAATTAGTCGATTTATTAGTGAACAAGGAAAAATATTATCTAG  
ACGAGTCAATAGATTGACCTTGAAACAACAACGATTAATTACTATTGCTATAAAACAAGCTCGTATTTTATCTTCGTTAC  
CTTTTCTT---AAT-----AATGAGAAA-----  
-----  
-----  
-----  
-----

-----CAGTTTGAGAGAACCGAGTCGACCCCT-----AGAACTACA-----GGTACTAGAGCCAGA-  
-----AAAAAAAAAATAGGCCTACTTCTCAAT-----GTGGCGCGTTCA-----CTAAAAAAA-----  
-----  
-----

AATCCTTTTGTAGCTAATCATTATTGGGAAAAATTGAGAAGCTCAACATGAGGGAGGAGAAAGAGATAATAGTCACTTG  
GTCCCGGCATCTACCATTATACCCACAATGATCGGTCATACAATTGCTATTCACAATGGAAAGGAGCATTACCTATTT  
ATATAACAGATCGTATGGTGGGTCACAAATTGGGAGAATTCGCACCTACTCTCACTTTC---CGG-----GGGCAT---  
-----  
GCGAGAAACGATAATAGATCTCGTCGG-----  
-----  
-----  
-----  
-----

Jasminum

GAAATGCGTTTTGGATAACATCCTTTTTTCGATTGGGTATGGCTTCGACTATTCGCCGAGCCCGCCAATTAGTTAACCATAG  
ACATATTTTAGTTAATGGGCGTATAGTAGATAGACCAAGTTATCGCTGCAAACCCGAGATATTATTATGACGAAGGATA  
ACCAAAAATCTAGAACTCTGATTCAAATTTCTCTCGGCTCATCCCCTCAGAAG-----  
GAATTGCCAAACCATTGACTCTT-----CACCCATTCCAA-----  
TATAAAGGATTAGTCAATCAAATAATAGATAGTAAATGGGTCGGTTTGAAA---  
ATAAATGAATTGCTAGTCGTAGAATATTCTCGTCAGACTAAAGCCTAAATGTCACGTCGAGGTACTGCAGAAGAAAA  
AACAGCAAAATCCGATCCATTTTATCGTAATCGATTAGTTAACATGTTGATTAACCGTATTCTGAAACACGGAAAAAAT  
CATTGGCTTATCAACTTCTCTATCGAACCTGAAAGAGGTTCAAAAAAGACAGAAAGAAATCCACTATCTATTTTACGT  
GAAGCAATACGTCGAGTAACTCCCGATATAGCAGTA-----AAAGCAAGACGA---  
AAAGGTGGATCAACTCGTCAAGTTCCCATTGAAATAGGATCCACACAAGGAAAAGCACTTGCCATTGCTTGGTTATTAGC  
GGCATCCCGAAAACGTCGGGTGGAAATATGGCTTTCAAATTCAGTTCGGAATTAGTGGATGCTTCCAAAGGGAAGGGCG  
GTGCC---ATACGCAAAAAGGAAGAGACTCATAAAATGGCAGAGGCAAAATAGAACTTTTGCACATTTTTCGTAA-----  
-----

ATGTGTAGGGATACCATTGCTGAGATACTAACCTCTATACGAAATGCTTATATGGATAGAAAAAGAGTGGTTTCGCATCGC  
ATCTACTAATATT-----  
ACCGAAAATATTGTGAAAATACTTTTCCGAGAAGGTTTTATTGAAAACGTTAGAAAACATCGAGAAAAAAACAAA-----  
-TCTTTTTTGTATTTAAACCTGCAGTGAATAGGAAAAGACTCCATAAAAATTTGTT-----AGT-  
-----

TTTAAATTAACCGTATCAGTCGACCCAGTCTACGAATCTATTCTAACTCTCAACGAATTCCTAGAATTTTCGGTGGGAT  
GGGATTGTAATTTCTTTCTACTTCTCGAGGTATAATGACAGACCGAGAGGCTCGACTCCACGGAATGGGAGGGGAAATTT  
TATGTTGTATATGGTAAATGGCAAAGGAACTCGTTTTATTAAT---  
TTTCGTAGATATGGACGTTTTGGTTCACGTAGATATAGACGTTTTGGTTCACATAAGAGTGTACGTAAA---  
ATACCAAGAGGGGTTATTCATATTCAAACAAGTTTCCACAATACCATTGTCACGGTTACAGACGGACGGGGTCAGGTGGT  
TTCTTGGTCTCGCGGGTACTTGTAGATTCAAGGGTCCGAGAAAAGGACACCCTTTGCCGCTCAAATGTAGCAGCAG  
ATGCTATTGGTCCAGTAGTGATCAG---  
GGTCTGCAACGAGCAAAAATCAAGCTAAAGGGTACCGGTCGCGGAAGAGACGCAGCATTACGAACTATTTCTAAAAGTGG  
TATAGGATTTACTTCCGTACAGGATGTAACCCCTGTCCCCATAATGGTTGACAGACCCCGAACAAAAAACGTCAATAGA  
TGCCAATTAACCAACTTATTAGAAATACAAGACAGTCAATTCGAAATGTCAAAAAATCCCCGCTCTTCAGGGGTGT  
CCTCAGCGCCGAGGAATATGTACTAGGGTGTAT-----  
ACTATCAACCCAAAAAACCAACTCTGCCACACGTAAAGTTGCCAGAGTACGATTAACCTCTGGATTTGAAATCACTGC  
TTATATACCCGGTATTGGCCATAATTCACAAGAACATTCTTCAGTCTTAGTAAGAGGGGGAAGGGTCCGGATTTACCCG  
GTGTAATAATATCACATTGTTTCAGGAACCCTAGATGCTGTGCGAGTAAAGGATCGTCAACAAGGGCGTTCTAAATATGG  
GTCAAAAAGCCAAAAAAAAGAAGTGA-----  
-----

ATGGCAAGGAAAAGTTTTGATTGAGAGGGAGAAAAAGAGGCAACAATTGGAACAGAAATATCATTGATTTCGTCGATCCTC

AAAAAAGAAATA---AGCAAAATTCATCGTTGAGT-----TACAAATCG-----  
GAATTTTATAGAAAATTACAATCCCCACCACGGAATAGTGCACCTACACGCCTTCATCGACGTTGTTTTTCGACCGGAAG  
GGCGAGAGCTCACTATCGAGACTTTGGACTATCCGGATACATACTTCGTGAAATGTTTCATGCATGTTTGTGGCCAGGAG  
CAACAAGATCAAGTTGGTAA-----ATGGTAAGA---  
AATTCATTCATTTCA-----ATTATTTCT-----CAAAAAGAAAACAAAAGAA---AAC-----AGAGGG---  
TCTGTTGAATTTCAAGTACTCAGTTTTACCCTAAGATAAGGAGACTTACTTCACATTTGAAATTGCACAAAACAGACTA  
TTCATCTGAGAGAGGTTTGGCGAAAATTTTGGGAAAACGCCAAAGAGTACTGGCTTATTTGTCAAAAAAAAAATAGAGTAC  
GTTATCAAGAATTACAAGATTTAATTAGTCAGTTGAATATTCGAGAGACAAAACTCGTTAA-----  
ATGATAAAACTTCGTTTGAACGATGTGGTAGAAAGCAACGAGCCGTCTATCAAATCGTTGCAATTGATGTTTCGATCCCC  
AAGAGAAGGAAAAGCTCTTCGAAAGGTGGGTTTTTATGATCCAATAAAGAATCAAACCTGATTTAAACGTTTCGTGCCATTC  
TATATTTCTTTGAAAAG-----GGTGCTCAACCTACAGGAAGTTCAGGATATTTTAAAGAAGCGGAAATTGAT---  
AAGGAA-----CTTCGA-----CCT-----AATCAA---ACGAAATTCAATTAA-----  
-----ATGGAAAA-----  
TCCGAGCGACCACTTATTAATAAAAAGCGACCTTTTCGTAAAAAAGCGATCTTTTCGT-----  
-----  
AAGCGTAGG---TCCCCG---ATT---  
GAATCGGGACATCAAATTGATTTTACAAACACGAGTTTGCTGAATCAATTTATTAGTCAACAAGGAAAAATATTACCTAG  
AAAAGTGACTAGATTGACCTTGAACAACAACGATTTATGACTAGTGCTATAAAACAAGCTCGTATTTTATCTTTGTTAC  
CTTTTGTC---TTT-----  
GATGATAAAAAAGTGAAAAAGAAACAAAAGGAAGAATTTCAAAGAAACAAAAGGAAGAATTTCAAAGAAACAAAAGGA  
AGAATTTCAAAGAAACAAAAGGAAGAATTTCAAAGAAACAAAAGGAAGAATTTCAAAGAAACAAAAGGAAGAATTT  
AAAAGAAACAATTTCAAAGAAAGAATTTCAAAGAACCAAGTCGACTGCTAGAACGACTAATGAGAAACAAACCAATGAG  
AAACAACCAAGTCGACTGCTAGAACGACTAATGAGAAACAAACCAAGTCGACTGCTAGAACGACTAATGAGAAACAAAC  
CAAGTCGACTGCTAGAACGACTAATGAGAAACAAACCAAGTCGACTGCTAGAACGACTAATGAGAAACAAACCAAGTCGA  
ACGAT-----AGAACTACT-----GATCTTAGAACCGA-----AAAAATAG-----  
-----  
AGGGCACGTTCA-----CTAAAAA-----  
AACCCTTTGTAGTCCATCATTTAGTAAGAAAAATTGATAAGCTTAATAAAAAAAAAAAGAAAGGAATAATAAAAACTTG  
GTCCCGCGCAAGTACCATTATACCTACAATGATCGGTCACTACTATTGCTGTTTATAAGGGTAAGGAACATTTGCCGATTT  
ATATAACAGATTATATGACAGGACACAAATTGGGAGAATTTGCCCTACTTTATATTTCTCCGA-----GGACAT---  
-----  
CCAACAGAAAGACCAACAAAAACGATAATAGATCTCAGCGTTAA-----  
-----  
ATGCTTTTTCACTTTTTTCTACGTTGTAATCTAGCATCCTTATGCATCAAGATAGTC-----  
AATTCGGTCGTTGTGGTC-----  
GGACTCTATTATGGATTGCTGACCACATTTTCCATAGGGCCTTCTTATTTCTTCTTCTCCGAGCTCAGGTTATG-----  
----GAAGAAGGA-----ACCGAGAAGAAGGTATCAGCAACAAC---  
GGTTTTATTACGGGACAGCTCATAATGTTTCATATCGATCTATTATGCGCCTCT  
Lactuca  
GAAATGCGCCTTGATAACATTCTTTTTCGCTTGGGTATGGCTCCGACTATTCCGGGAGCTCGCCAATTAGTTAACCATAG  
ACATATTTTAGTCAATGGTCGTATAGTAGATATACCAAGTTATCGCTGCAAACCCCGAGATACTATTGCGGGCAGGGGATG  
AACAAAAATCTAAAGTTCTAATTCAAAATTCTCTCGATTTCATCCCCCATGAG-----  
GAATTGCCAAACCATTTGACTCT-----CAACCATTCAA-----  
TATAAAGGATTAGTCAATCAAATAATAGATAGTAAATGGGTGCGTTTGAAA---  
ATAAATGAATTGCTAGTTGTAGAATATTATTCTCGTCAGACTTAA-----  
ATGTCACGTCGAGGTACTGCAGAAGAAAAAAGTCAAAAATCCGATCCAATTTATCGTAATCGATTAGTTAACATGTTGGT  
TAACCGTATTTCTGAAACACGGAAAAAATCATTGGCTTATCAAATTATCTATCGAGCCGTGAAAAAGATTCAACAAAAGA  
CAGAAACAAATCCACTATCTGTTTTACGTCAAGCAATACATGGAGTAACTCCGGGTATAGCAGTA-----  
AAAGCAAGACGT---  
GTAGGTGGATCGACTCAGCAAGTTCCCATTGAAATAGGATCCACACAAGGAAAAGCACTTGCCATTGCTTGGTTATTAGC  
GGCATCCCGAAAACGTCCGGGTGCAAAATATGGCTTTCAAATTAAGTTCCGAATTAGTGGATGCTGCCAAAGGGAGTGGCG  
ATGCC---ATACGCAAAGGGAAGAGACTCATAAAATGGCAGAGTCAAATAGAGCTTTTGCACATTTTCGTTAA-----  
---  
ATGGGTAGTGATACTATTGCTGACATAATAACCTCTATACGAAATGCCGATATGTATAGAAAAAGCGTGGTTTCGAGTAGC  
ATCTACTAATATC-----  
AGCCAAAGTATTGTTAAATACTTTTACGAGAGGGTTTTATCGAAAACGTGAGAAAACATCGAGAAAACAACAAA-----  
-TCTTTTTTGGTTTTAAACCCTACGACAT-----AGACGGAATAGGAAAAG-----ACTTATAGAAAT-----CTT-

-----  
TTAAATTTAAAACGGATCAGTCGGCCGGGTCTACGAATCTATTCTAACTATCAAAGAATTCCTAGAAATTTTAGGTGGGAT  
GGGGATTGTAATTTCTTTCTACCTCTCAGGGTATAATGACAGACCGAGAGGCTCGACTAGAAAAGAATAGGCGGAGAAATTT  
TGTGTTATATATGGTAAATGGCAAAAGCTATACCGAAAAAAGGT---TCACGT-----  
---GGACGTATTGGTTCACGTAAGAGTACACGTAAA---  
ATACCAAAGGGGGTTATTCATATTCAAGCAAGTTTTCAATAATACCATTGTGACTGTTACAGATGTACGGGGGCGAGTGGT  
TTCTTGGTCCTCTGCCGGTACTTCTGGCTTCCGAGGTACAAAAGAGGGACGCCATTTGCTGCTCAAACCGCAGCAGGAC  
ATGCTATTTCGTGCAGTAGTAGATCAA---  
GGTATGCAACGAGCAGAAGTCATGATTAAGGTCCCGGTCTCGGAAGAGACGCAGCATTACGAGCTATTTCGCAGAAGTGG  
TATACTATTAACTTTCGTACGGGATGTAACCCCTATGCCACATAATGGCTGTAGACCCCCGAAAAAAGACGCTGTGTAGA  
TGCCAACGATTAACAACCTTATTAGAAAATACAAGACAGCCAATTAGAAATGTCACAAAATCCCCCGCGCTTCGGGGATGC  
CCTCAGCGTCGAGGAACATGTACTAGGGTGTAT-----  
ACTATCACCCCAAAAAAACCAAACCTCTGCCTTACGTAAAGTTGCCAGAGTACGATTAACCTCTGGATTTGAAATCACTGC  
TTATATACCCGGTATTGGCCATAATTCACAAGAACATTCTGTAGTCTTAGTAAGAGGGGGGAGGGTTAAGGATTTACCCG  
GTGTGAGATATCACATTGTTTCGAGGAACCCTAGATGCTGTTCGGAGTAAAGGATCGTCAACAAGGGCGTTCT-----  
-----AGTGC GTTGTAG-----  
-----  
ATGGCAAAAAAAGTTTTGATTTCAGAGGGAAAAGAAGAGGCCAAAAATTGGAACAGAAATATCATTGATTTCGTCGATCCTC  
AAAAAAGAAATA---AGCAAAGTTCGATCGTTGAGT-----GACAAATGG-----  
GAAATTTATGGAAAGTTACAATCCCCACCGCGGAATAGCGCGCCTACACGCCTTCATCGACGTTGTTTTTCAACTGGAAG  
GCCAAGAGCTAACTATCGAGACTTTGGACTATCCGGACACATACTTCGTGAAATGGTTCATGCATGTTTGTGGCCAGGGG  
CGACAAGATCGAGTTGGTAA-----ATGGTAAAA---  
AATTCATTTATTTCA-----ATTATTTTTCAAGAACAAGAAGAAAACAAAGAA---AAC-----AGAGGA---  
TCTGTTGAATTTCAAGTAGTAAGTTTACCAATAAGATACGTAAACTTACTTCACATTTGGAATTGCACAAAAAAGACTA  
TTTATCTCAGAGAGGTCTGCGGAAAATTCTGGGAAAACGTCAACGGTTGCTGGCTTATTTGTCAAAAAAATAGAGCGC  
GCTATAAAGAGTTA-----ATAGGCCAGTTGAATATTCGAGAGAGAAAAACTCGTTAA-----  
ATGGTAAAACCTTCGTTTTAAAACGATGTGGTAGAAAGCAACGAGCCGTCTATCGAATCGTTGCAATTGATGTTTCGATCCCG  
AAGAGAAGGAAGAGATCTTCGGAAAGTGGGTTTTTATGATCCGATCAAGAATCAAACCTTATTTAAACGTTCCCGCTATTC  
TCTATTTCTTTGAAAAA-----GGCGCTCAGCCTACAGGAAGTTCAGGATATTTTAAAAAAGGCAGAGGTTTTTT---  
AAGGAA-----CTTTGC-----CCT-----AATCAA---ACGAAATTC AATTAA-----  
-----ATGGATAAA-----TCCAAGCGAACTTTTCTTAAATCCAAGCGATCTTTTCGT-----  
-----  
-----AGGCGTTTG---CCCCG---ATC---  
CAATCGGGGGATCGAATTGATTATAAAAACATGAGTTTAATTAGTCGATTTATTAGTGAACAGGGAAAAATATTATCTAG  
ACGAGTGAATAGATTGACCTTGAAACAACAACGATTAATTACTATTGCTATAAAAACAAGCTCGTATTTTATCTTTGTTAC  
CTTTTCTT---AAT-----AATGAGAAA-----  
-----  
-----  
-----CAATTTGAAAGAACCGAGTCGACCACT-----AGAACTCCT-----AGTCTTAGAGCCAGA-  
-----AAAAGATAG-----GTGACACGTTCA-----CTAAAAAA-----  
-----  
AATCCGTTTGTAGCGAATAATTTATTAATAAAAAAATAAATAAGCTTAACACAAAAGCAGAAAAAGAAATAATAAACCTG  
GTCCCGGGCATCTACCATTATACCCATAATGGTCGGCCATACTATTGCTATCCATAATGGAAAGGAACATTTACCTATTT  
ATATAACAGATCGTATGGTAGGACACAAATTGGGAGAATTTGCACCTACTTTAAATTTT---CGA-----GGCCAT---  
-----  
GCAAAAAGCGATAATAGATCGCGTCGTTAA-----  
-----  
ATGATTTTGAAATCTTTTCTACTAGGTAATCTAGTATCCTTATGCATGAAGATAATC-----  
AATTCGGTCGTTGTGGTC-----  
GGACTCTATTATGGATTTCTGACCACATTCTCCATAGGGCCCTCTATCTCTTCTTCTCCGAGCTCACATTATG-----  
----GAAGAAGGAGAAGAAGGAACCGAGAAGAAGGTATCAGCAACAAC---  
GGTTTTATTACGGGACAGCTCATAATGTTTCATATCGATCTATTATGCGCCTCT  
Liriodendron  
GAGATGCGTTTGGATAACATCCTTTTTTCGATTGGGTATGGCTTCGACCATTCTGGAGCCAGGCAATTAGTTAACCATAG

ACATATTTTGTAAATGGTTCGTATAGTAGATATCCCAAGTTATCGCTGCAAACCCCGAGATATTATTACTACGAGAGGTG  
AACAAAGATCCAGAGCTCTGATTCAAATTTATATTGATTCATCCCCCACGAG-----  
GAATTGGCAAACATTTGACTTTT-----CACTCATCCCAA-----  
TATAAAGGATTAGTAAATCAAATAATAGATAGTAAATGGATCGGTTTGAAA---  
ATCAATGAGTTGCTAGTCGTAGAATATTATTCTCGTCAGACT-----  
ATGTCACGTCGAGGTACTGCAGAAGAAAAACTGCAAATCCGATCCAATTTATCGTAATCGATTAGTTAACATGTTGGT  
TAACCGTATTCTGAAACACGGAAAAAATCATTGGCTTATCAAATTATCTATCGAGCCGTGAAAAAGATTCAACAAAAGA  
CAGAAACAAATCCACTATCTGTTTTACGTCAAGCAATACGTGGAGTAACTCCCGATATAGCAGTA-----  
AAAGCAAGACGT---  
GTAGGTGGATCGACTCATCAAGTTCCCATTGAAATAGGATCTACACAAGGAAAAGCACTTGCCATTTCGTTGGTTATTAGG  
GGCATTCCCGAAAACGTCCGGGTCGAAATATGGCTTTCAAATTAAGTTCCGAATTAGTGGATGCTGCCAAAGGGAGTGGCG  
ATGCC---ATACGCAAAAAGGAAGAGACTCATAGAATGGCAGAGGCAAATAGAGCTTTTGCACATTTTCGT-----  
---  
ATGGGTAGGGACACTATTGCCGATATATTAACCTTCTATAAGAAATGCCGACATGGATAAAAAAGGAACGGTTTCGAATAGC  
ATCTACTAATATG-----  
GCCGAAAGCGTTGTTAAATACTTCTACGAGAAGGTTTTATTGAAAACGTTAGGAAACATCGGGAAAAACAACAAA-----  
-TATTTCTTGGTTTTCAACCCTGCGACAT-----AGAAGAAATAGGAAAGGC-----ACATATAGAAAT-----ATT-  
-----  
TTAAAGCGTATCAGCCGACCCGGCCTACGAATCTATTCCAATCAACGAATTCCTAGGATTTTAGGTGGAATGGGGAT  
TGTCATTCTTTCTACTTCTAGAGGTATAATGACAGATCGGGAAGCTCGACTAGAAGGAATTGGAGGAGAAGTTTTGTGTT  
ATATATGG---ATGACAAAACCTATACCAAGAATTGGT---TCACGT-----  
AGGAATGGGCGTATTGGTTCACGTAAGAGTGGGCGTAGA---  
ATACCAAAAGGAGTTATTCATGTTCAAGCGAGTTTTCAACAATACCATTGTGACTGTTACAGATGTACTAGGTCAGGTGGT  
TTCTTGGTCTCCGCTGGTACTTGTGGATTTAGAGGCACAAGAAGAGGGACACCATTTGCTGCTCAAACCGCAGCAGGAA  
ACGCTATTTCGTACAGTAGTGGATCAG---  
GGTATGCAACGAGCAGAAGTCATGATAAAGGGTCTGGTCTCGGAAGAGATGCAGCACTACGAGCTATTTCGTAGAAGTGG  
TATACTATTAAGTTTTCGTACGTGACGTAACCCCTATGCCACATAATGGATGTAGACCTCCTAAAAAAGACGTGTG---  
ATGCCAACTATTAACAACATATTAGAAAACAAGACAGCCAATCAGAAATGTCACGAAATCCCCAGCTCTTCGAGGATG  
TCCTCAGCGTCGAGGAACATGTACTAGGGTGTAT-----  
ACTATCACCCCCAAAAAACCAACTCTGCCTTACGTAAAGTTGCCAGAGTACGATTAACCTCTGGATTTGAAATCACTGC  
TTATATACCTGGTATTGGCCATAATTCACAAGAACATTCTGTAGTCTTAGTAAGAGGAGGAAGGGTTAAGGATTTACCCG  
GTGTGAGATATCACATTGTTTCGAGGAACCCTAGATGCTGTGCGAGTAAAGGATCGTCAACAAGGGCGTTCTAGATATGGG  
GTCAAAAAGCCAAA-----  
-----  
ATGGCAAGAAAAAGTTTTGATTAGAGGGAGAGAAAAAGGCAGAAATTTGGAACAGAAATATCATTGATTTCGTGATCCTC  
AAAAAAGAAATA---AGCAAAGTTTCATCGTTGAGT-----GACAAATGG-----  
GAAATTCATGAAAATTGCAATCCCCACCACGTAATAGTGCACCTACACGTCTTCATCGACGTTGTTTTTCGACCGGAAG  
GCCTAGAGCTAACTATCGAGACTTTGGGCTATCCGGACACATACTTCGCGAAAGGGTTCATGCATGTTTTGTTGCCGGGG  
CAACAAGATCAAGTTGG-----ATGGTAAAA---  
AATTCATTATCTCA-----GTTATCCCG-----CAAGAAGAAAAAGAAAA---AAC-----AAAGGG---  
TCTGTTGAATTTCAAGTATTCAGTTTACCAATAAGATACGGAGACTTACTTCACATTTGGAATTGCACAGAAAAGACTA  
TTTATCTCAGAGAGGTCTGCGGAAAATTCTGGGAAAACGCCAACGTCTACTGGCTTATTTGTCAAAGAAAAATAGAGTAC  
GTTATAAAGAATTA-----ATTGGTTCGGTTGGATATTCGGGAACCAAAAACCTCGT-----  
ATGGTAAAACCTTCGTTTGAACGATGTGGTAGAAAGCAACGTGCCATCTATCGAATCGTTGCAATTGATGTTCCGATCCCG  
AAGAGAAGGAAGAGATCTTCGTAAAGTGGGTTTTTACGATCCGATAAAGAACCAAACTTATTCAAATGTTTCCTGCTATTC  
TATATTTCTTTGAAAA---GGTGCTCAACCTACAGGAAGTTCATGATATTTCAAAGAAGGCGGAAGTATTT---  
AAGGAA-----CTTCGA-----ATT-----AATCAA---ACGAAATGA-----  
-----ATGGATAAA-----TCCAAGCGACTCTTTCGTAAATCCAAGCGATCTTTTCGT-----  
-----  
-----AGGCGTTTG---CCCCA---ATT---  
GGATCGGGGGATCGAATTGATTATAGAAACATGAGTTTAATTAGTCAATTTATTAGTGAACAGGGAAAAATATTATCTAG  
ACGAGTGAATAGATTGACCTTGAACAACAACGATTAATTACTATTGCTATAAACAAGCTCGTATTTTATCTTCGTTAC  
CTTTTCTT---AAT-----AATGAGAAA-----  
-----  
-----  
-----

-----CAATTTGAGAAAACCGAGTCGATCCCT-----AGAACTACT-----GGTCCTAGAACCAGA-  
-----AATAAA-----  
-----GTGACGCGTTCA-----CTCAAAAA-----  
-----

AATCCTTTTGTAGCTAATAATTTCTTGGGAAAAATTGAGAAGCTCAACATGAGGGAGGAAAAAGAGATAATAATAACTTG  
GTCGCGGGCATCTACCATTATACCCACAATGATCGGCCATACAATTGCTATTTCATAATGGAAAGGATCATTACCTATTT  
ATATAACAGATCGTATGGTCGGTCACAAATTGGGAGAATTTCGCACCTACTCTGACTTTC---AAG-----GGACAC---

-----GCGAGAAACGATAATAGATCTCGTCGT-----

-----  
ATGATTTTGAATCTTTTCTACTAGGTAATCTATTATCCTTATGCATGAAGATAATA-----  
AATTCGGTCGTTGGGGTC-----  
GGACTCTATTATGGATTTCTGACCACATTCTCCATAGGGCCCTCTTATCTCTTCTTCTCCGAGCTCGGGTTATG-----  
----GAAGAAGGA-----ACCGAGAAGGAGGTATCAGCAACAAC---  
GGTTTTATTACGGGACAGCTCATGATGTTTCATATCGATCTATTATGCGCCTCT

Lotus

GAAATGCGTTTTGGATAACATACTTTTTCGATTAGGTATGGCTTCAACTATTCCTCAAGCCAGACAATTAGTTAACCATAG  
ACATGTTTTTCGTTAATGGTCATATAGTAGATATACCAAGTTATCGTTGCAAACCACAAGATATTATTACAGCGAAGGATA  
ACAAAAAATCTAAAACCTCTGATTCAAATTTCTTGAATCAGCCCCCGCGAG-----  
GAATTGCCAACCCATTTGACTCTT-----CAGCCATTCCAA-----  
TATAAAGGATTAGTAAATCAAATAATAGATAGTAAATGGGTTGGTTTGAAA---

ATTAATGAATTGCTAGTTGTAGAATATTATTCTCGTCAGACT-----  
ATGTCACGGCGAGGTACTGCAGAAAAAAAACCGCAAAATCCGATCCAATTTATCGTAATCGATTGGTTAACATGTTGGT  
TAACCGTATTCTGAAACACGGAAAAAATCATTGGCTTATCAAATTATCTATCGAGCTATGAAAAAGATTCAACAAAAGA  
CAGAAACAAATCCACTATCTGTTTTACGTCAAGCAATACGTGGAGTAACTCCCGATATAGCAGTA-----  
AAAGCAAGACGC---

GTAGGCGGATCGACTCATCAAGTTCCCATTGAAATAGGATCCACACAAGGAAAAGCACTTGCTATTTCGTTGGTTATTAGG  
GGCATCCCGAAAACGTCCGGGTCGGAATATGGCTTTCAAATTAAGTTCCGAATTAGTGGATGCTGCCAAAGGGAGTGGCG  
ATGCC---ATACGGAAAAAGGAAGAGACTCATAGAATGGCAGAGGCAAATAGAGCTTTTGCACATTTTCGT-----  
---

ATGGGTAAGGACACCATCGCTGACATAATAACCTCTATACGCAATGCTGACATGAATAGAAAAAGAACTGTTCAAATACC  
ATTTACTAACATC-----  
ACCGAAAACACTGTAAAAATACTTTTACGAGAGGGTTTTATTGAAAACGTGAGAAAACATCGGGAAAGCGACAAA-----  
-TCTTTTTTAGTTTTAACTCTACGATAT-----AGAAGAAATACGAAAGGA-----TCATATAAACT-----TTT-

-----  
TTAAATTTAAAACGGATCAGTACACCCGGTCTACGAATCTATTATAACTATCAAAAAATTCCTAGAAATTTAGGAGGTAT  
GGGGATTGTAATTTCTTTCTACTTCGAGGGGTATAATGACAGATCGAGAGGCTCGATTAGAAAAAATCGGCGGAGAAGTTT  
TATGTTATATATGG---ATGGCAAACCTATACCAAAGATTGGT---TCACGT-----  
AAAAATGCACGTAGTGGTTCTCGTAAGCATCTTCGTAAA---

ATACCAAAGGGGATTATTCATGTTCAAGCTAGTTTTAACAATACCATTGTAAGTGTACAGATGTACGAGGTAGGGTGAT  
TTCTTGGTCTCCGCCGGTACTTGTGGATTCAAGGGTACACGAAGGGGAACACCATTTGCCGCTCAAACCGCAGCAGGAA  
ATGCTATTGCAACAGTAGCGGATCAA---  
GGTATGCAACGAGCAGAAGTCATGATAAAAGGTCCCGGTCTCGGAAGAGATGCAGCATTAAAGAGCTATTCGTAGAAGCGG  
TATATTATTAACCTTTATACGGGATGTAACCTCTATGCCACATAATGGATGTAGGTACCTAAAAAAGACGTGTA---  
ATGCCAACTATGAAACAACCTATTAGAAAGACAAGACAGCCAATCCGAAATGTCACCAAATCCCCGCTCTTCGGGGATG  
CCCTCAGCGCCGAGGAACCTTGTAAGGTGAT-----

ACTATCACCCCTAAAAAACCAACTCTGCCTTACGTAAGTTGCCAGAGTACGCTTAACCTCTGGATTTGAAATCACTGC  
TTATATACCCGGTATTGGCCATAATTTACAAGAACATTCTGTAGTCTTAGTAAGAGGGGGAAGGGTTAAGGATTTACCCG  
GTGTGAGATATCACATTGTTTCGAGGAACCCCTGGATGCTGTTCGGAGTAAAAGATCGTCAACAAGGGCGTTCTAAATATGGG  
GCCAAAAGCCAAA-----  
-----  
ATGGCAAGGAAAAGTTTTGATTGAGAGGGGAGAAAAAGAGGCCAAAAATTAGAACAAAAATATCATTGATTGCGCCGATCCTC  
AAAAAAGAAATA---AGCAAAGTTCGGTCGTTAAGT-----GAGAAATGG-----  
AAAATTCATGGAAAGTTAGAATCACTACCGCGTAATAGTGCACCCACACGTCTTCATCGACGTTGTTTTTCAACCGGAAG  
ACCGCGAGCTAATTATCGAGACTTTGGATTATCTGGACACACACTTCGTGAAATGGTTCATGAATGTTTGTGCCCCGGT  
CAACAAGATCAAGTTGG-----ATGGTAAAA---  
AAATCATTATACCG-----GTTATTTCA-----CAAGAAAAAAGAAGAA---AAC-----CCCGBA---

TCGGTTGAATTTCAAGTATTTAATTTACCAACAAGATACGAAGACTTACTTCACATTTTGAATTGCACCGAAAAGATTA  
TTTATCTCAAAGAGGATTACGTAAAATTCTCGGGAAACGGCAACGATTACTTTCTTATTTGTCAAAGAAAAATAAAATAC  
GTTATAAAAAATTA-----ATAAATCTGTTGGATATTCGAGAGTCAAAAATTCGT-----  
ATGGTAAAACCTTCGTTTGAACGATGTGGTAAAAAGCAACGAGCTGTTTATCGAATCGTTGCAATAGATGTTTCGATCTCG  
AAGAGAGGGACGAGATCTTCGGAAAGTGGGTTTTTATGATCCAATAAAAAATCAAACCTATTTAAATATTCCTGTTATTC  
TAAATTTCTTTGAGCAA-----GGTGCTCAACCTACAGGAAGTTCAGGATATTTCAAAAAGGCAGGTTTTCTTT---  
ATGGAC-----CTTTGA-----  
-----ATGGATAAA-----TCTAAGCGACTCTTTCTGAAATCCAAGCGATTTTTTTCGT-----  
-----  
-----AGGCGTTTG---CCCCCG---ATC---  
CAATCGGGGGATCGAATTGATTATAAAAAACATGAGTTAATTAGTCGATTTATTAGTGAACAGGGAAAAATTTTATCTAG  
ACGTGTGAATAGATTGACCTTAAAACAACAACGATTAATTACAATTGCTATAAAAACAAGCTCGTATTTTATCTTCGTTAC  
CTTTTATT---AAT-----AATGAAAAAAAA-----  
-----  
-----CAATTTGAAAAAAGCGAGTTGACAGCC-----ACTAGAACTACTACT---GTTTTTAAAAACAAA-  
-----AAAAGA-----  
-----GTGACACGTTCC-----CTAACAAAA-----  
-----  
AATCCTTTTGTAGCGAATCGTTTATTAAGAAAAATAAATAATCTTAACACAAAATCAGAAAAAGAAATAATAAATACTTG  
GTCCAGAACATCTACCATTATACCCGCAATGATTGGCCATACCATTGCTATTCACAATGGAAAAGAGCATTACCGATT  
ATGTAACGGATCGTATGGTAGGCCATAAATTGGGAGAATTTCTCCTACTCTAAACTTC---CGG-----GGACAC---  
-----  
GCAAAAAATGATAATAGATCTCGGCGT-----  
-----  
ATGATTTTTCAATCTTTTATACTGGATAATCTAGTATCCTTATGCCTCAAGATAATT-----  
AATTCGGTCATTGTGGTC-----  
GGACTCTATTATGGATTTATGACCACATTCTCCACAGGGCCCTCTTATCTATTCTTCTTCGAGCTCACGTTATG-----  
----GAAGAAGGG-----ACCGAGAAGAAAATATCAGCAACAACCT---  
GGGTTTATTACGGGACAGCTCGTGATGTTTCATATCGATCTATTATGCGCCTTT  
Morus  
GAAATGCGGTTGGATAACATCCTTTTTTCGATTAGGTATGGCTTCAACTATTCTCAAGCCCGGCAATTGGTTAACCATAG  
ACATATTTTAGTTAATGGTCGTATAGTAGATATACCAAGTTATCGCTGCAAACCCCGAGATATTATTAGAGTGAAAGATG  
AACAAAAATCTAAGTCTCTGGTTCAAATTTATCTTGATTCATCCTCCCGTGAG-----  
GAATTGCCAAAACATTTGACTCTT-----CACCCATTCCAA-----  
TATAAAGGATCAGTCAATCAAATAATAGATAGTAAATGCGTCGGTTTTGAAA---  
ATAAATGAATTGCTAGTTGTAGAATATTATTCTCGTCGACTTAA-----  
ATGTCACGTCGAGGTACTGCAGAAGAAAAAAGTGCAAAATCCGATCCAATTTATCGTAATCGATTAGTTAACATGTTGGT  
TAACCGTATTCTGAAACACGGAAAAAATCATTGGCTTATCAAATTTATCTATCGAGCCATGAAAAAGATTCAACAAAAGA  
CAGAAACAAATCCACTATCTGTTTTACGTCAAGCAATACGTGGAGTTACTCCCATATAGCAGTA-----  
AAAGCAAGACGT---  
GTAGGCGGATCGACTCATCAGGTTCCCATTGAAATAGGATCCACACAAGGAAAAGCACTTGCCATTGTTGGTTATTAGG  
GGCATCCCGAAAACGTCCGGGTGAAAATATGGTTTTCAAATTAAGTTCCGAATTAGTGGATGCTGCCAAAGGGAGTGGCG  
ATGCC---ATACGCAAAAAGGAAGAGACTCATAGAATGGCAGAGGCAAATAGGGCTTTTGCACATTTTCGTTAA-----  
----  
ATGAGTAAAGACACTATTGCTAACATACTAACTTCTATACGAAATGCTGACATGAATAAAAAAAGAACAGTTCGAATACC  
ATATACTAACATC-----  
ACTGAAAACATTCTTAAATCCTTTTACGAGAAGGTTTTATTGAAAACATGAGGAAACATCAGGAAAGCAACAAT-----  
-CTTTTTTTTGTTTTAAACCCTACGACAT-----AGAAGGAAAAGGAATAGGAAAGGACCAGATAAAACT-----GTT-  
-----  
TTAAATTTAAAACGGATCAGTCGACCCGGTCTACGAATCTATTCTAACTATCAACGAATCCCAAGAATTTTAGGCGGGAT  
GGGAATTGTAATCTTTCTACTTCTCGGGGTATAATGACAGACCGAGAGGCTCGACTAGAAGGAATCGGTGGAGAAATTT  
TGTGCTATATATGGTAAATGGCAAACCTCTACCAAGAATTGGT---TCACGT-----  
AAGAATAGACATATGGGTTACGTAAAAATGTACGTAGA---  
ATACCAAAGGGAGTTATTCATGTCCAAGCAAGTTTTCAACAATACTATTGTGACTGTTACAGATGTACGGGGGCGGGTAAT

TTCTTGGTCCTCCGCCGGTACTTGCGGATTCAAAGGTACAAAAAGAGGGACACCATTTGCCGCTCAAACCGCAGCAGGAA  
ATGCTATTCGGACAGTAGTGGATCAG---  
GGTATGCAACGAGCAGAAGTCATGATAAAAGGCCCGGTCTCGGAAGAGATGCGGCATTAAGAGCTATTCGCAGAAGTGG  
TATACTATTAAGTTTTCATACGAGACGTAACCTCCTATGCCACATAATGGCTGCAGGCCCCCTAAAAAAGACGTGTGTAAA  
TGCCAACCTATTAACAACCTTATTAGAAACACAAGACAGCCAATCAAAAATGTCACGAAATCCCCCGCTCTTCGGGGATGT  
CCTCAGCGACGAGGAACATGTACTAGGGTGTAT-----  
ACTATCACCCCCAAAAACCAACTCTGCCTTACGTAAAGTTGCCAGAGTACGCTTAACCTCTGGATTTGAAATCACTGC  
TTATATACCTGGTATTGGCCATAATTTACAAGAACATTCTGTAGTCTTAGTAAGAGGGGGAAGGGTTAAGGATTTACCCG  
GTGTGAGATATCACATTGTTTCGAGGAACCCTAGATGCTGTGCGGAGTAAAGGATCGTCAACAAGGGCGTTCTAAATATGGG  
GTCAAAAAGCCAAAATA-----

ATGGCAAGAAAAAGTTTTGATTAGAGGGGAGAAGAAGAGGCCAAAAATTGGAACAAAAATATCATTGATTGATTCGTCGATCCTC  
AAAAAAGAAATA---AGCAAAGTTCGGTCGTTGAAT-----GAGAAATGG-----  
AAAATTCATGGAAAGCTACAATCCCTACCACGTAATAGTGCACCTATACGCCTTCATCGACGTTGTTTTTCGACTGGAAG  
ACCGAGGGCTAACTATCGGGACTTTGGGCTATCCGGACACATACTTCGTGAAATGGTTCAGGCCTGTTTGTGCCCCGGAG  
CAACAAGATCCAGTTGGTAA-----ATGATAAAA---  
AAGTCATTTCATCTCG-----GTTATTTCA-----CACGAAGAAAAAGAAAA---AAC-----AGGGGG---  
TCTGTTACATTTCAAATACTAAGCCTCACTAATAGGATACGAAAACCTTTCTTCACATTTGGAATTGCACAGAAAAGACTA  
TTTATCTCAGAGAGGCCTCCGTAAAATTTGGGAAAACGCCAAAGGATGCTGTCTTATTTGTCAAAGAACAATAGAATAC  
GTTATAAAGAATTA-----ATTAATCAGTTAGATATTCGGGAATCAAAAACGCGTTAA-----  
ATGGTAAAACCTTCGTTTAAAACGATGTGGTAGAAGGCAACGTGCTATTTATCGAATTGTTGCAATTGATGTTTCGATCCCG  
AAGAGAAGGAAGAGCTCTTCGGAAGTGGGTTTTTATGATCCGATAAAGAATCAAACCTATTTAAACGTTTCTGTTATTC  
TATATTTCTTGAAAAA-----GGCGCTCAGCCTACAGGAAGTTCATGATATTTCAAAGAAGGGCGGGGTTTTT---  
ATGGAA-----CTTCGC-----CTT-----AATCACCAACAAAATTCAATTA-----  
-----ATGGATAAA-----TCCAAGCGACTCTTTCTTAAATCTAAGCGATCTTTTCGT-----

-----AGGCGTTTG---CCCCG---ATA---  
CAATCGGGGGATCGAATTGATTATAGAAACATGAGTTTAATTAGTCGATTTATTAGTGAACAAGGAAAGATATTATCTAG  
ACGGGTGAATAGATTGACCTTAAAACAACAACGATTAATTACTATTGCTATAAAAACAAGCTCGTATTTTATGTTTGTAC  
CCTTTCTT---AAT-----AATGAGAAA-----

-----CAGTTTGAAGAAGCGAGTCGACTCCT-----AGAACTACT-----GGTCTTAGAATTA---  
-----AATAAATAG-----GTGGCACGTTCA-----CTAAAAAA-----

AATCCTTTTGTAGCCAATCATTATTAAGAAAAATAAATATGCTTAACACAAAAGCAGAAAAAGAAATAATAGTAACTTG  
GTCCCAGCATCTACCATTATACCCACAATGATCGGTCATACTATCGCTGTTTATAATGAAAGGAGCACTTGCCCATTT  
ATATAACAGATCGTATGGTAGGCCATAAATTAGGAGAATTTGCACCCACTTTAAATTTT---AGG-----GGACAT---

GCAAAAATGATAATAGATCTCGTCGTTAA-----

ATGATTTTTCAATCTTTTATACTAGGTAATCTAGTATCCTTATGCATGAAGATAATA-----  
AATTCGGTCGTTGTGGTC-----  
GGACTCTATTATGGATTTCTGACCACATTCTCCATAGGGCCCTCTTATCTCTTCTTCTCCGAGCTCGTGTATG-----  
----GAAGAAGGAGAAGAAGGAACCGAGAAGAAAGTATCAGCAACAACC---  
GGTTTTATTACGGGACAGCTCATGATGTTTATATCGATCTATTATGCGCCTCT

Nandina

GAAATGCGTTTTGGATAATATCCTTTTTTCGATTAGGTATGGCTTCGACCATTCTGGAGCCCCGACAATTAGTTAACCATAG  
ACATATTTTAGTTAATGGTCGTATAGTAGATATACCAAGTTATCGCTGCAAACCCCGAGATATTATTACGACAAGGGATG  
AACAAAAATCCAGAGCTCTGATTCAAATTTATCTTGATTCTCCCCCATGAG-----  
GAATTGCCAAAACATTTGACTCTT-----CACTCATCTCAA-----  
TATAAAGGATTAGTCAATCAAATAATAGATAGTAAGTGGGTTGGTTTTGAAA---  
ATAAATGAGTTGCTAGTCGTAGAATATTATTCTCGTCAGACT-----  
ATGTCACGTCGAGGACTGCAGAAGAAAAACTGCAAATCCGATCCAATTTATCGTAATCGATTAGTTAACATGTTGGT

TAACCGTATTTTGAACACGGAAAAAATCATTGGCTTATCAAATTATCTATCGAGCCCTGAAAAAGATTCAACAAAAGA  
CAGAAACAAATCCACTATGTGTTTTACGTCAAGCAATACGTGGAGTAACTCCCATATAGCAGTA-----  
AAAGCAAGACGT---  
GTAGGCGGATCGACTCATCAAGTTCCCATTGAAATAGGATCTACACAAGGAAAAGCAGCTTGCCATTTCGTTGGTTATTAGG  
GGCATCCCGAAAACGTCCGGGTGCGAAATATGGCTTTCAAATTAAGTTCCGAATTAGTGGATGCTGCCAAAGGGAGTGGCG  
ATGCC---ATACGCAAAAAGGAAGAGACTCATAGAATGGCAGAGGCAAATCGAGCTTTTGCACATTTTCGT-----  
---  
ATGGGTAGGGACACTATTGCCGACATAATCACTTCTATACGAAATGCTGACATGGATAAAAAGGGAACGGTTCGAATCGC  
ATCTACGAATATT-----  
ACCGAAACCATTGTTAAAATACTTCTACGGGAAGGCTTTATTGAAAATGTGAGAAAACATCGAGAAAACGATCAA-----  
-TTTTTCTTGGTTTTCAACTCTGCGACAT-----AGAAGGAATAGGAAAGGA-----CCATATAGAACT-----ATT-  
-----  
TAAAACGTATCAGCCGACCCGGTCTACGAATCTATTCCAATCAACGAATTCCTAGGATTTTAGGAGGAATGGGAAT  
TGTAATTTCTTTCTACTTCTCGAGGTATAATGACAGACCGAGAGGCTCGACTAGAAGGAATCGGGGGAGAAATTTTGTGT  
ATATATGG---ATGACAAAACCCATATCAAGAATTGGT---TCACGT-----  
AGGAATGTACGCATCGGTTACGTAAGAGTGGACGTAGA---  
ATACCAAAGGAGTTATTCATGTTCAAGCAAGTTTCAACAATACCATTGTAACGGTTACAGATATACGGGGTTCGGGTGGT  
TTCGTGGTCTCCGCCGGTACTTGTGGATTTCAGGGGCACAAGAAGAGGCACGCCATTTGCTGCTCAAACCGCAGCATCAA  
ATGCTATTCGTACAGTAGTAGATCAG---  
GGTATGCAACGAGCAGAAGTCAGGATAAAAAGGTCTCGGAGAGATGCAGCATTACGAGCCATTTCGTAGAAGTGG  
TATACTATTAAGTTTTGTGAGAGACGTAACCCCTATGCCACATAATGGATGTAGACCTCTAAAAAAGACGTGTA---  
ATGCCAACTATTAACAACCTATTAGAAACACAAGACAGCCAATAAAAAATGTCACAAAATCCCCCGCTCTTCGGGGATG  
CCCTCAGCGTAAAGGAACATGTACTAGGGTGTAT-----  
ACTATCACCCCCAAAAACCAAATCTGCCTTACGTAAAGTTGCCAGAGTACGATTAACCTCTGGATTTGAAATCACTGC  
TTATATACCTGGTATTGGCCATAATTTACAAGAACATTCTGTAGTCTTAGTAAGAGGAGGAAGGGTTAAGGATTTACCCG  
GTGTGAGATATCACATTGTTTCGAGGAACCCTAGATGCTGTGCGGAGTAAAAGATCGTCAACAAGGGCGTTCTAAATATGGG  
GTCAAAAAGCCAAAATA-----  
-----  
ATGGCAAGGAAAAGTTTTGATTTCAGAGGGGAGAAGAAGAGGCAGAGATTGGAACAGAAATATCATTTCGTCGATCCTC  
AAAAAAGAAATA---AAAAAAGTTCGGTCTTGGAGT-----GAAAAAATG-----  
GAAATTCACGGAAAATTACAATCCCCACCACGTAATAGTGCACCTACACGTCTTCATCGACGTTGTTTTTCGACCCGGAAG  
ACCAAGAGCTACCTATCGAGACTTTGGGTTATCCGGACATATACTTCGTGAAATGCTTCATGCATGTTTGTACCAGGGG  
CAACAAGATCAAGTTGG-----ATGATAAAA---  
AATCCATTTCATCTCG-----GTTATTTTCG-----CAAGAAGAAAAGAAGAA---AAT-----AAGGGG---  
TCTGTTGAATATCAAATATTAAGTTTACCAATAAGATACGGAGACTTACTTCACATTTAGAATTGCACAGAAAAGATTT  
TTTATCTCAGAGGGGTTTTCGGAAAATTCTGGGAAAACGTCAACGTCTGCTGGCTTATTTGTCAAAGAAAATAGAGTAC  
GTTATAAAGAATTA-----ATTAGTCAATTGGATATTCGGGAACCAAAAACCTCGT-----  
ATGGTAAAACCTTCGTTTAAAACGATGTGGTAGAAAGCAACGAGCTATCTATCGAATCGTTGCAATTGATGTTTCGATCCCG  
AAGAGAAGGAAGGGATCTTCAGAAAGTGGGTTTTTACGATCCGATAAAGAATCAAACCTATTCAAATGTTCCCGCTATT  
TATATTTCTTGAAAAA-----GGCGCTCAGCCTACAGGAACCGTTCATGATATTTTAAAGAAGGCAGAGATTTT---  
AAAGAA-----CTTCAC-----GTT-----AATTAA-----  
-----ATGGATAAA-----TCCAAG---CTTTTTCTTAAATCCAAGCGATCTTTTCGT-----  
-----  
-----AGGCGTTTG---CCCCA---ATT---  
GGATCGGGGGATCGAATTGATTATAGAAACATGAGTTTAAATTAGTCGATTTATTAGTGAGCAAGGAAAAATATTATCTAG  
ACGAGTGAATAGATTGACTTTGAAACAACAACGATTAATTACTATTGCCATAAACAAGCTCGTATTTTATCTTCGTTAC  
CTTTTCTT---AAT-----AATGAGAAA-----  
-----  
-----CAATTTGAGAGAACTGAGTCTACTCT-----AGAACTACA-----GGTCTCGAACCAGA-  
-----AAGAAA-----  
-----GTGACACGTTCA-----CTAAAAAA-----  
-----  
AATCCTTTTGTAGCTAATCATTATTGGGAAAAATCGAGAAGCTCAACATGAGGGCAGAAAAAGAAATAATCGTAACTTG  
GTCCCGGCATCTACCATTATACCATAATGATCGCCATACAATTGCTATTTCATAATGAAAAGAACATTTGCCTATTT



ATATAACAGAGAGTATGGTAGGTCACAAATTGGGAGAATTCGCACCTACTCTGACTTTC---CGG-----GGGCAT---  
-----  
GCGAGAAATGATAAAAAATCTCGCCGT-----  
-----  
ATGATTTTTAACTCTTTTCTACTAGGTAATCTATTATCTTTATGCATGAAGATAATC-----  
AATTCGGTCTGTTGGTGC-----  
GGACTCTATTATGGATTTCTGACCACATTCTCCATAGGGCCCTCTTATCTCTTCTTCTCCGAGCTCGGGTTATG-----  
----GAAGAAGGA-----ACCGAGAAGGAGGTATCAGCAACAACT---  
GGTTTTATTACGGGACAGCTCATGATGTTTCATATCGATCTATTATGCGCCTCT  
Nicotiana  
GAAATGCGTTTTGGATAACATCCTTTTTTCGATTGGGTATGGCTTCAACTATTCCCGCAGCCCGTCAATTAGTTAACCATCG  
ACATATTTTAGTTAATGGTCGTATAGTAGATATAACCGAGTTATCGCTGCAAACCCCGAGATATTATTACGGCAAAGGATG  
AACAAAAATCCAGAGCTCTGATTCAAATTTCTCTCGATTTCATCCCTCATGAG-----  
GAATTACCAAACCATTTGACCCTT-----CACCCATTCCAA-----  
TATAAAGGATTAGTCAATCAAATAATAGATAGTAAATGGGTCGGTTTTGAAA---  
ATAAATGAATTGCTAGTCGTAGAATATTATTCTCGTCAGACT-----  
ATGTCACGTCGAGGTACTGCAGAAAAAAAAACAGCAAAATCCGATCCAATTTATCGTAATCGATTAGTTAACATGTTGGT  
TAACCGTATTCTGAAACACGGAAAAAAAAATCATTGGCTTATCAAATTATCTATCGAGCCGTGAAAAAGATTCAACAAAAGA  
CAGAAACAAATCCACTATCCGTTTTACGTCAAGCAATACGTGGAGTAACTCCCGATATAACAGTA-----  
AAAGCAAGACGT---  
GTAGGTGGATCGACTCATCAAGTTCCCATTGAAATAGGATCCACACAAGGAAAAGCACTTGCCATTGCTTGGTTATTAGC  
GGCATCCCGAAAACGTCCGGGTGCAAAATATGGCTTTCAAATTAAGTTCGCAATTAGTGGATGCTGCCAAAGGGAGTGGCG  
ATGCC---ATACGCAAAAAGGAAGAGACTCATAGAATGGCAGAGGCAAAATAGAGCTTTTGCACATTTTCGT-----  
---  
ATGGGTAGGGACACTATTGCTGAGATAATAACTTCTATACGAAATGCTGATATGGATCGAAAAAGGGTGGTTCGAATAGC  
ATCTACTAATATT-----  
ACCGAAAATATTGTTCAAATACTTTTACGAGAAGGTTTTATCGAAAACGTGAGAAAACATCGAGAAAAAAACAAA-----  
-TATTTTTTGGTTTTAAACCCTGCGACAT-----AGAAGGAATAGGAAAAGA-----CCCTATAGAAAT-----ATT-  
-----  
TTAAATTTAAAACGAATCAGTCGACCTGGTCTACGAATCTATTCTAATTATCAACGAATTCGCGAATTTTAGGTGGAAT  
GGGGATTGTAATCTTTTCTACTTCTCGAGGTATAATGACAGACCGAGAGGCTCGACTAGAAGGAATAGGTGGAGAGATTT  
TGTGTTATATCTGG---ATGGCAAAAGCTATACCGAAAATTAGT---TCGCGT-----  
AGGAATGGACGTATTGGTTCACGTAAGGGTGCACGTAGA---  
ATACCAAAGGGAGTTATTCATGTTCAAGCAAGTTTTCAATAATACCATTGTCACTGTTACAGATGTACGGGGTTCGAGTAGT  
TTCTTGGTCTCCTCCGCCGTTACTTCTGGATTCAAAGGTACGAGAAGAGGAACACCGTTTTGCTGCTCAAACCGCAGCAGCAA  
ACGCTATCCGTACAGTAGTGGATCAA---  
GGTATGCAACGAGCAGAAGTCATGATAAAAGGTCCCGGTCTCGGAAGAGATGCAGCATTACGAGCTATTTCGTCGAAGTGG  
TATACTATTAACCTTTTCGTACGGGATGTAACCTCTATGCCACATAATGGCTGTAGACCTCCGAAAAAAGACGTGTG---  
ATGCCAACTATTAACAACCTTATTAGAAATACAAGACAGCCAATCAGAAATGTCACGAAATCCCCCGCTCTTCGGGGCTG  
TCCTCAGCGTCGAGGAACATGTAAGGGTGTAT-----  
ACTATACCCCCAAAAAACCAACTCTGCCTTACGTAAAGTTGCCAGAGTACGATTAACCTCTGGATTTGAAATCACTGC  
TTATATACCCGGTATTGGCCATAATTTACAAGAACATTCTGTAGTCTTAGTAAGAGGGGGAAAGGGTTAAGGATTTACCCG  
GTGTGAGATATCACATTGTTTCGAGGAACCCTAGATGCTGTGCGAGTAAAGGATCGTCAACAAGGGCGTTCTAAATATGGG  
GTAAAAAAGCCAAA-----  
-----  
ATGGCAAGGAAAAGTTTGATTAGAGGGGAGAAGAAGAGGCAAAAATTTGGAACAGAAATATCATTTCGATTCGTCGATCCTC  
AAAGAAAAGAAATA---AGCAAGGTTCCGTCGTTGAGT-----GACAAATGG-----  
GAAATTTATGGAAAGTTACAATCCCCACCACGGAATAGTGCACCTACACGCCTTCATCGACGTTGTTTTTTGACCCGGAAG  
GCCGAGAGCTAACTATCGAGACTTTGGACTATCCGGACACATACTTCGTGAAATGGTTCATGCATGTTTGTGCCAGGAG  
CAACAAGATCAAGTTGG-----ATGGTAAAA---  
AATTCTGTCATTTCA-----GTTATTTCT-----CAAGAAGAA-----AAG-----AGAGGA---  
TCTGTTGAATTTCAAGTATTCAATTTACCAATAAGATACGGAGACTTACTTCACATTTAGAATTGCACAAAAAAGACTA  
TTTATCTCAGAGAGGTTTGAAGAAAATTTGGGAAAACGTCAACGACTCCTAGCTTATTTGTCAAAAAAATAGAGTAC  
GTTATAAAGAATTA-----ATTAATCAGTTGGACATTCGAGAGACAAAACTCGT-----  
ATGGTAAAACCTTCGTTTGAACGATGTGGTAGAAAGCAACGAGCCGTCTATCGAATCGTTGCAATTGATGTTTCGATCCCG  
AAGAGAAGGAAAAGATCTTCGAAAGTGGGTTTTTATGATCCGATAAAGAATCAAACCTATTTAAATGTTTCTGCTATTT  
TATATTTCTTGAAAAA-----GGGGCTCAACCTACAGGAAGTTCAGGATATTTTAAAGAAGGCGGAGGTTTTT---

AAGGAA-----CTTCGT-----CCT-----AATCAA---TCCTAA-----  
-----ATGGATAAA-----TCCAAGCGACCTTTTCTTAAATTCAAGCGATCTTTTCGT-----  
-----AGGCGTTTG---CCCCG---ATT---  
CAATCGGGGGATCGAATTGATTATAGAAACATGAGTTAATTAGTCGATTTATTAGTGAACAAGGAAAAATATTATCAAG  
ACGAGTGAATAGATTGACCTTGAAACAACAACGATTAATTACTCTTGCTATAAAACAAGCTCGTATTTTATCTTTGTTAC  
CCTTTCTC---AAT-----AATGAGAAA-----  
-----  
-----CAATTTGAAAGAACCGAGTCGACCGCT-----AGAACTACT-----GGTTTTAAAGCCCGA-  
-----AATAAA-----  
-----GTGACACGTTCA-----CTAAAAAA-----  
-----  
AATCCCTTTGTAGCCAATCATTATTTAAAAAAATTGATAAGCTTAACACAAAAGCAGAAAAAGAAATAATAGTAACTTG  
GTCCCAGGATCTACCATTATACCCACAATGATCGGTTCATACGATTGCTATCCATAATGGAAAAGAGCATTGCTTATTT  
ATATAACGGATAGTATGGTAGGCCACAAATTGGGAGAATTTGCACCTACATTAATTTT---AGA-----GGACAT---  
-----  
GCAAAAAGCGATAATAGATCTCGTCGT-----  
-----  
ATGATTTTTCAATCTTTTCTACTAGGTAATCTAGTATCCTTATGCATGAAGATAATC-----  
AATTCGGTCGTTGTGGTC-----  
GGACTCTATTATGGATTTCTGACCACATTCTCCATAGGGCCCTCTTATCTCTTCTTCTCCGAGCTCTGGTTATG-----  
----GAAGAAGGA-----ACCGAGAAGAAGGTATCAGCAACAAC---  
GGTTTTATTACGGGGCAGCTCATGATGTTTCATATCGATCTATTATGCGCCTCT  
Nuphar  
GAGATGCGTTTTGGATAACATCCTTTTTTCGATTGGGTATGGCTTCAACTATTCTGGAGCCAGGCAATTAGTTAACCATGG  
ACATATTTTAGTTAATGGTCGCTAGTAGATATACCAAGTTATCGCTGCAAACCCGAGATATTATCACTACGAAGGATA  
AACAAAGATCCAGAGCTTTGATTCAAATCATATGGATTTCATCCTCCAACGCG-----  
GAATTGCCAAAACATTTGACTCTG-----CACTCATTGCAA-----  
TATAAAGGGGTAGTAAATCAAATAATAGATAGTAAATGGGTGCGTTTTGAAA---  
ATCAATGAATTGCTAATCGTAGAATATTATTTCCCGACAACT-----  
ATGTCACGTCGAGGTACTGCAGAAGAAAAAACTGCAAAATCCGATCCAATTTATCGTAATCGATTAGTTAACATGTTGGT  
TAACCGTATTCTGAAACACGGAAAAAAATCATTGGCTTATCAAATTATCTATCGAGCCGTGAAAAAGATTCAACAAAAGA  
CAGAAACAAATCCACTATCTGTTTTACGTCAAGCAATACGTGGAGTAACTCCCAATATAGCAGTA-----  
AAAGCAAGACGT---  
GTAGGCGGATCGACTCATCAAGTTCCCATTGAAATAGGATCTACACAAGGAAAAGCACTTGCCATTGCTTGGTTATTAGG  
GGCATCCCGAAAACGTCCGGGTGCAAAATATGGCTTTCAAATTAAGTTCCGAATTAATCGATGCTGCCAAGGGGAGTGGCG  
ATGCT---ATACGCAAAAAGGAAGAGACTCATAGAATGGCAGAGGCCAATAGAGCTTTTGCACATTTTCGT-----  
---  
ATGGGTAGAGACACTATTGCCGATATAATAAATTATATAAGAAATGCTGACATGGATAAAAAAGGAACGGTTCGAATAGC  
ATCCACAAATATT-----  
ACCGAAAACATTGTTAAATACTTCTACGAGAGGGTTTTATCGAAAATGTTAGGAAGCATCGGGAAAACAACAAA-----  
-TATTTCTTGGTTTTAACCTACGACAT-----AGAAGAAATAGGAAAGGA-----GCATATAGAAAT-----ATT-  
-----  
TTAAAGCGTATCAGCAGACCAGGTCTGCGAATCTATTCCAATCTCAACGAATTCCTAGGATTTAGGCGGGATAGGGGT  
TGTAGTTCTTTCTACTTCTAGAGGTATAATGACAGATCGAGAAGCTCGACTAGAAGGAATTGGAGGAGAAATTTGTTTT  
ATATATGG---ATGACAAAACCTATACCAAGAATTGGT---TCACGT-----  
AGAAATAGCCGTATTAGTTCACGTAAGAGTGGGGGTCGA---  
ACACCAATAGGAGTTATTCATGTTCAAGCGAGTTTCAACAATACTATTGTTACTGTTACAGACCCACAAGGTGCGGTGCT  
TTCTTGGTCCTCCGCGGGTACCTGTGGATTCAAGGGCACAAGAAGGGGTACCCATTTGCTGCTCAAACCGCAGCAGGAA  
ATGCTATTTCGTACGGTAGTAGACCAG---  
GGTATGCAACGAGCAGAAGTCATGATAAAAGGTCCCGGTCTCGGAAGAGATGCAGCATTACGAGCGATTTCGTAGGAGTGG  
TATACTATTAATTTTCGTACGTGACGTAACCCCTATGCCACATAATGGATGTAGACCGCCAAAAAAAGGCGCGTT---  
ATGCCAACTATTAACAACCTATTAGAAACACAAGACAGCCAATGAGAAATGTCACGAAATCTCTGCTCTTCGAGGATG  
TCCTCAGCGTAGAGGAACATGTACTAGGGTGTAT-----

ACTATCACCCCAAAAAACCAAACCTCTGCCTTACGTAAAGTTGCCAGAGTACGATTAACCTCTGGATTTGAAATCACTGC  
TTATATACCTGGTATTGGCCATAATTTACAAGAACATTCTGTAGTATTAGTAAGAGGAGGAAGGGTTAAGGATTTACCCG  
GTGTGAGATATCACATTGTTTCGAGGAACCTAGATGCTGTCTGGAGTAAAGGATCGTCAACAAGGGCGTTCTCAATATGGG  
GTA AAAAAGCCAAA-----  
-----  
ATGGCAAGGAAAAGTTTGATTAGAGGGGAGAAGAAGAGGCAGAAATTAGAAGAGAAATATCATTGATTTCGTCGATCCTC  
AAAAAAGAAATA---AGCAAAGTTTCATCGTTGAGC-----GAGAAATGG-----  
GAAATTCATAGAAAATTGCAATCCCCACCACGTAATAGTGCACCTATACGTCTTCATCGACGCTGTTTTTTGACCGGAAG  
ACCTAGAGCTAACTATCGAGACTTTGGGCTATCCGGACACGTACTCCGCGAAATGGTTCATGCATGTTTGTGCGGGGG  
CAACAAGATCAAGTTGG-----ATGGTAAAG---  
AATTCGTCCATATCA-----GTTATTCCG-----CAAGAAGAAAA-----AGGGGT---  
TCTGTTGAATTTCAAGTATTTAGTTTTACCAATAAGATAAAGAGACTTACTTCACATTTGGAAGTGCACAGAAGGGATTA  
TTTATCCAGAGGGGTCTGCGGAAAATGCTGGGGAAACGTCAACGACTGTTGGTTTTATTATCAAAGAAAAATCGAGTGC  
GTTATAGGGAATTA-----ATTGGTCAATTGGGCATTCCGGAAACCAAAGACTGGT-----  
ATGGTAAACTTCGTTTTGAAACGATGTGGTAGAAGGCAACGAGCCACCTATCGAATCATTGCAATTGATGTTAGATCCCG  
AAGAGAGGGGAGAGATCTTCGAAAAGTAGGCTTTTACGACCCGATAAAGAATCAAACCTATTTAAATGTTCTGCTATTC  
TATATTTGCTTGAAAA-----GGAGCTCAACCCACGAAACTGTTTCATGATATTTCAAAAAGGCAGAGGTATTT---  
AAGGAA-----CTTCTA-----GTT-----AATCAA---ACAAAATGA-----  
-----ATGGATAAA-----TTCAAGCGACCCTTTCGTAAATCCAAGCGATCTTTTCGT-----  
-----  
-----AGGCGTTTG---CCCCA---ATT---  
GGGTTGGGGGATCGAATTGATTATAGAAACATGAGTTAATTAGTCGATTTATTAGTGAACAAGGAAAAATATTACCTAG  
GCGAGTGAATAGATTGACCTTGAAACAACAACGATTAATTACTATTGCTATAAAACAAGCTCGTATTTTATCTTTGTTAC  
CTTTTCTT---AAT-----AATGAGAAA-----  
-----  
-----CAATTTGAGAGAGCCGAGTCGATCTCT-----AGAACTACT-----GGCACTAGAACCAGA-  
-----AAAAA-----GTGGCCCGTTCA-----TCTAAAAA-----  
-----  
AATCCTTTTGTAGCTAATCACTTATTAAGTAAAATTGAGAAGCTCAACGTGGAGGAGGAAAAAAGGATAATAGTAACTTG  
GTCCCAGGATCGACCATTTACCTGCAATGGTTCGCTCATAAATTGCTATTTCATAACGAAAGGAGCATTTACCTATTT  
ATATAACGGATCGTATGGTGGGTCGCAAATTTGGGAGAATTTGCACCTACTCTGACTTTC---CGG-----GGACAC---  
-----  
GCGAAAAACGATAATAGATCTCGGCGG-----  
-----  
ATGATTTTGAATATAGTCTACTCGGTAATCTATTATTATTATGGATGAATATAGTT-----  
AATTCGGTTCGTTTTGGTC-----  
GGACTTTATTATGGATTTCTAACCACATTTTCTATAGGTCCTCTTATCTCTTACTTCTACGAACTCGGGTTATG-----  
---AAAGAAGG-----AGCGAAAAAGAGGTATCAGCAACAACC---  
GCTTTTATTATGGGACAGTTCATAATATTCATATCGACCTATTATCCGCCCT  
Nymphaea  
GAGATGCGTTTTGGATAACATTCTTTTTCGATTGGGTATGGCTTCAACTATTCTGGAGCCAGGCAATTAGTTAACCATGG  
ACATATTTAGTTAATGGTCGCTAGTAGATATACCAAGTTATCGCTGCAAACCCCGAGATATTACTACGAAGGATA  
AACAAGGATCCAGAGCTTTGATTCAAATCATATGGATTTCATCCTCCAACGCG-----  
GAATTGCCAAAACATTTGACTCTG-----CACTATTCCAA-----  
TATAAAGGGGTAGTCAATCAAATAATAGATAGTAAATGGGTCGGTTTTGAAA---  
GTCAATGAATTGCTAATCGTAGAATATTATTCGACAAACT-----  
ATGTCACGCCGAGGACTGCAGAAGAAAAACTGCAAAATCTGATCCAATTTATCGTAATCGATTAGTTAACATGTTGGT  
TAACCGTATTCTGAAACACGGAATAAATCATTGGCTTATCAAATTATCTATCGAGCCGTGAAAAAGATTCAACAAAAGA  
CAGAAACAAATCCACTATCTGTTTTACGTCAAGCAATACGTGGAGTAACTCCCAATATAGCAGTA-----  
AAAGCAAGACGT---  
GTAGGCGGATCGACTCATCAAGTTCCCATTGAAATAGGATCTACACAAGGAAAAGCACTTGCCATTGTTGGTTATTAGG  
GGCATCCCGAAAACGTCCGGGTGCAAAATATGGCTTTCAAATTAAGTTCCGAATTAGTCGATGCTGCCAGGGGGAGTGGCG  
ATGCC---ATACGCAAAAAGGAAGAGACTCATAGAATGGCAGAGGCCAATAGAGCTTTTGCACATTTTCGT-----

---  
ATGGGTAGAGACACTATTGCCGATATAATAACTTATATAAGAAATGCTGACATGGATAAAAAAGGAACAGTTCGAATACC  
ATCCACTAATATT-----  
ACCGAAAACATTGTTAAAATACTTCTGCGAGAGGGTTTTATCGAAAATGTTAGGAAGCACCCGGGAAAAACAACAAG-----  
-GATTTCTTGGTTTTAACCTACGACAT-----AGAAGAAATAGGAAAAGA-----GCATATAGAAAT-----ATT-  
-----  
TTAAAGCGTATCAGCAGACCAGGTCTGCGAATCTATTCCAACCTCTCAACGAATTCCTAGGATTTTCAGGCGGGATAGGGGT  
TGTAATCTTTCTACTTCTAGAGGTATAATGACAGATCGAGAAGCTCGACTAGAAAAGAATTGGAGGAGAAATTTTGT  
ATATATGG---ATGACAAAACCTATACCAAAAATTGGT---TCACGT-----  
AGAAATAGCCGTATTAGTTCACGTAAGAGTGGGTGTAGA---  
ACACCAATAGGAGTTATTCATGTTCAAGCGAGTTTCAACAATACTATTGTTACTGTTACAGACCCACAAGGTTCGGGTCGT  
TTCTTGGTCTTCCGCAGGTACCTGTGGGTTCAAGGGCACAAGAAGGGGTACCCCATTTGCTGCTCAAACCGCAGCAGGAA  
ATGCTATTTCGTGCGGTAGTGGACCAG---  
GGTATGCAACGAGCAGAAGTCATGATAAAGGGGCCCCGGTCTCGGGAGAGATGCAGCATTACGAGCGATTTCGTAGAAGTGG  
TATACTATTAATTTTTGTACGTGACGTAACCCCTATGCCGCATAATGGATGTAGACCGCCAAAAAAAAGGCGCGTT---  
ATGCCAACTATTAACAACCTATTAGAAAACAAGACAGCCAATGAGAAATGTCACGAAATCTCCTGCTCTTCGAGGATG  
TCCTCAGCGTAGAGGAACATGTACTAGGGTGTAT-----  
ACTATCACCCCCAAAAACCAAACTCTGCCTTACGTAAGTTGCCAGAGTACGATTAACCTCTGGATTTGAAATCACTGC  
TTATATACCTGGTATTGGCCATAATTTACAAGAACATTCTGTAGTATTAGTAAGAGGAGGAAGGGTTAAGGATTTACCCG  
GTGTGAGATATCACATTGTTTCGAGGAACCCTAGATGCTGTGCGAGTAAAGGATCGTCAACAAGGGCGTTCTAAATATGGG  
GTCAAAAAGCCAAA-----  
-----  
ATGGCAAGGAAAAGTTTTGATTTCAGAGGGGAGAAGAAGAGGCAGAAATTAGAAGAGAAATATCATTGATTTCGTCGATCCTC  
AAAAAAGAAATA---AGCAAAGTTTCATCGTTGGAC-----GAGAAATGG-----  
GAAATTCATGTAATAATTGCAATCCCCACCACGTAATAGTGCACCTATACGTCTTCATCGACGCTGTTTTTTGACCGGAAG  
ACCTAGAGCTAACTATCGAGACTTTGGGCTATCCGGACACGTACTCCGCGAAATGGTTCATGCATGTTTGTGCGCGGGG  
CAACAAGATCAAGTTGG-----ATGGTAAAG---  
AATTCGCCCATATCC-----GTTATTCCA-----CAAGAAGAAAA-----AGGGGT---  
TCCGTTGAATTCCAAGTATTTAATTTTACCAATAAGATAGAGAGACTTACTTCACATTTGGAAGTGCACAGAAGAGACTA  
TTTATCTCAGAGGGGTCTGCGGAAAATTCTGGGAAACGCCAACGACTGTTGGTTTTATTTATCAAAGAAAAATCGAGTGC  
GTTATAGGGAATTA-----ATTGGTCAATTGGGTATTTCGAGAACCAAAACTGGT-----  
ATGGTAAAACCTTCGTTTGAACGATGTGGTGAAGGCAACGAGCCACCTATCGAATCATTGCAATTGATGTCAGATCCCCG  
AAGAGAGGGAAGAGATCTTCGAAAGTAGGCTTTTACGACCCGATAAAGAATCAAACCTATTTAAATGTTTCTGCTATTC  
TATATTTCTTGAAAAA-----GGAGCTCAACCCACGGGAAGTTCATGATATTTCAAAAAGGCAGAGGTATTT---  
AAGGAA-----CTTCGA-----GTT-----AATCAA---ACAAAATGA-----  
-----ATGGAGAAA-----TTCAAGCGACCCTTTTCGTAATCCAAGCGATCTTTTCGT-----  
-----  
-----AGGCGTTTG---CCCCA---ATT---  
GGGTTGGGGGATCGAATTGATTATAGAAACATGAGTTAATTAGTCGATTTATTAGTGAACAAGGAAAAATATTACCTAG  
GCGAGTGAATAGATTGACCTTGAAACAACAACGATTAATTAATGCTATAAAAACAAGCTCGTATTTTATCTTTGTTAC  
CTTTTCTT---AAT-----AATGAGAAA-----  
-----  
-----CAATTTGAGAGAGCCGAGTCGATTTCT-----AGAACTACC-----GGCACTAGAACCAGA-  
-----AAAAA-----  
-----GTGGCCCGTTCA-----TCTAAAAA-----  
-----  
AATCCTTTTGTAGCTAATCACTTATTAAGTAAAATTGAGAAGCTCAACAAGGCGGAGGAAAGAAGTATAATAGTAACTTG  
GTCCCAGGATCCACCATTATATTTGCAATGGTTCGTCATACAATTGCTGTTTATAACGGAAGGAGCATTACCTATTT  
ATATAACGGAGCGTATGGTGGGTACAAAATTGGGAGAATTTCGCGCCTACTCTGACTTTC---CGG-----GGACAC---  
-----  
GCGAGAAACGATAATAGATCTCGGCGA-----  
-----  
ATGATTTTGAATATAGTCTACTCGGTAATCTATTATTATTATGGATTAATATAGTT-----  
AATTCGGTTCGTTATGGTC-----

GGACTTTATTATGGATTTCTAACCACATTTTCTATAGGTCCCTCTTATCTCTTACTTCTAAGAACTCGGGTTATG-----  
----AAAGAAGGG-----AGCGAAAAAGAAGTATCAGCAACAACC---  
GCTTTTATTATGGGACAGTTCATAGTATTATATCGACCTATTATCCGCCCTT  
Oenothera  
GAAATGCGTTTTGGATAACATCCTTTTTTCGATTGGGTATGGCTTCGACCATTCTCAAGCCCCCCAATTAGTTAACCATAG  
ACATATTTTAGTTAATGGTCGTATAGTGGATATACCAAGTTATCGTTGCAAACCGCGAGATATTATTACGGCGAAGGATG  
ATCAAAAATCGAAAGCTATGATTCAAATTTCTTGAATCACCCCCCATGAG-----  
GAAGTGCCAAAACATTTGACTTTT-----CACCCATTCCAA-----  
TATAAAGGATTAGTCAATCAAATAATCGATAGTGAATGGGTCGGTTTTGAAA---  
ATAAATGAATTGCTAGTCGTAGAATATTATTCTCGTCAGACTAAAACC---  
ATGTCACGTCGAGGTACTGCAGAAGAAAAAACTGCAAAATCCGATCCAATTTATCGTAATCGATTAGTTAACATGTTGAT  
TAACCGTATTCTGAAACACGGAAAAAAATCATTGGCTTATCAAATTTCTATCGAGCCATGAAAAAGATTCAACAAAAGA  
CAGAAAACAAATCCACTATCCGTTTTACGTCAAGCAATACGTAGAGTAACTCCCAATATGACAGTA-----  
AAAGCAAGACGT---  
GTAAGCGGATCGACTCATCCAGTTCCTTCAAATAGGATCCACACAAGGAAGAGCATTGCCATTGCTTGGTTATTAGG  
GGCATCCCGAAAACGTCCGGGTCGAAATATGGCTTTCAAATTAAGTTCCGAATTGGTGGATGCTACCAAAGGGAGGGGCG  
GTGCC--ATACGCAAAGGGAAGAG-CTCATAGAATGGCAGAGGCAATAGAGCTTTTGCGCATTTTCGT-----  
---  
ATGGGTAGGGACACTATTGCTGACATAATAACCTCTATACGAAATGTTGACATGAATAGAAAAGGGACGGTTCGAATAGA  
ATCTACTAACATG-----  
CCGAAAGAGATTGTTAAATACTTTTACGGGAGGGTTTTATCGAAAACGTGCGAAAACACCAGGAAAAACAAGAAA-----  
-TCTTTTTTGGTTTTAACCTACGACAT-----AGAAGGAATAGGAAAGGACCCTCTCCCTCTAGAACT-----  
TCTTTAAATTTAAATTTAAACCGGATTAGTCGACCTGGCCTCCGAGTCTATTCTAACTATCAAAAAATTCCTAGAATTT  
AGGCGGGATGGGATTGTAATTTCTTACTTCTCGAGGGATAATGACAGACCGAGAGGCTAGACTAGAAGGAATCGGCG  
GAGAAATTTGTGTTATATATGG---ATGGCAAAATCTATACCAAGCGCTGGT---TTACGT-----  
TTACGTTTACGTTTACGTAGGAATGCGCGTAGGCGTTCACGTAAGAGTACGCGTAAA---  
ATCCCAAAGGGGGTTATTCATGTTCAAGCGAGTTTCCACAATACTATTGTGACTGTTACAGATGTGCGGGGGCGGGTAAT  
TTCTTGGTCTCCGCCGCTACTTGTGGATTCAAGAGTACAAGAAAAGGGACGCCATTTGCTGCTCAAACCGCAGCAGGAG  
ATGCTATTCCGGCCAGTAGTGGATCAA---  
GGTATGCAACGAGCAGAAGTCAGGATAAAAAGGTCCCGGTCTCGGAAGAGATGCGGCATTACGAGCGATTTCGTAGAAGTGG  
TATACGATTAAGTTGTATACGTGATGTAACCCCTCTGCCACATAATGGCTGTATGCCCCCGAAAAAAGGCGCGTG---  
ATGCCAACTATTAACAACCTTATTAGAAACACAAGACAGCCAATCAGAAATGTCACGAAATCGCCCGCCCTGCGGGGATG  
TCCTCAGCGCCGAGGAACATGTACTAGGGTGTAT-----  
ACTATCAACCCCAAAAAACCTAACTCTGCCTTACGTAAAGTTGCCAGAGTACGATTAACCTCTGGATTTGAAATCACTGC  
TTATATACCTGGTATTGGCCATAATTCACAAGAACATTCTGTAGTCTTAGTAAGAGGGGGAAGGGTTAAGGATTTACCCG  
GTGTGAGATATCACATTGTTTCGAGGAACCCCTAGATGCTGTGCGAGTAAAGGATCGTCAACAAGGGCGTTCTAAATATGG  
GTCAAAAGGCCAAAA-----  
-----  
ATGGCAAGAAAAGTTTTGATTAGAGGGGAGAAGAAGAGGGAAAAAATTGGAACAAAAATATCGTTTTGATTTCGTCGATCCTC  
AAAAAAGAAATA---AGCACAGCTCCGTCATTAAGT-----GAAAAATGG-----  
AAAATTCATGGAAAGTTACAATCCTCACCACGTAATAGTGCACCTACACGTCTTCATCGACGTTGTTTTTCGACCGGAAG  
ACCTAGAGTTAACTATCGAGACTTTAGGCTTTCCGGACACATACTTCGTGAAATGGTTCAAGCATGTTTGTGTCAGGGG  
CAACAAGATCAAGTTGG-----ATGGTAAAA---  
AAGGCATTCAATTTCC-----GTTATTTCA-----CAAGAAGAA-----AAC-----AGGGGG---  
TCTGTTGAATTTCAAGTAGTTAGCTTACCAATAAGATACGAAGACTTACTTCCCATTTGGAATTCACAGAAAAGACTT  
TTTATCCCAGAGGGGTCTACGTAAAATCCTGGGAAAACGACAACGCTGCTGTCTTATTTGTCAAAGAAAAGACAAAAGTCC  
GTTATACAGAATTA-----ATTAGTCAGCTAGATATCCGAGAATTAACAACCTCGT-----  
ATGGTAAAACCTTCGTTTGAACAGATGTGGTAAAAAGCAACGAGCCGTTTATCGAATCGTTGCAATTGATGTGCGATCCCG  
CAGAGAAGGAAGAGATCTTTGGAAAGTGGGTTTTTATGATCCGATAAATAATAAACCTATTTAGATATTCCAGGTATT  
TATATTTCTTGA AAAA-----GGCGCTCAACCCACAGGAAGTGTATGATATTTTAAAGAAAGCGGGGGTTTTT---  
ACAGAA-----TTTAGT-----CTT-----AATCAA---ATGGAAGTCAATTAA-----  
-----ATGGATAAA-----TCCAAGCGACTCTTTCTTAAATCTAAGCGATCTTTTCGT-----  
-----  
-----AGGCGTTTG---CCCCG---ATC---  
CAATCGGGGGATCGAATTGATTATAGAAACATCAGTTTAATTAGTCGATTTATTAGTCAACAAGGAAAAATTTTATCGAG  
ACGGGTAAATAGATTGACTTTAAACAACAAGATTAATTACTATTGCTATAAACCAAGCTCGTATTTTATCTTTATTAC  
CTTTTCGT---CCG-----AAGGCGCAA-----



ACCTAGAGCTAACTATCGAGACTTTGGGCTATCCGGACACATACTTCGAGAAATGGTTTATGCATGTTTGTACCGGGTG  
CAACAAGATCCAGTTGG-----ATGAAAAAGAAAGGAGGTAGAAAAATTTTGGATTTATGGTTAAA-----

-----GAAGAAAAAGAAGAA---AAC-----TGGGGT---

TCTGTTGAATTTCAAGTATTCAGTTTCACCAATAAGATACGGAGACTTGCTTCACATTTGGAATTACACAAAAAAGATTT  
TTCATCGGAAAGAGGTCTCCGAAGACTTTTGGGAAAACGTCAACGTTTGGCTGGCTTATTTGGCAAAGAAAAATAGAGTAC  
GTTATAAGAAATTA-----ATCAGTCAGTTGGATATTAGGGAGCGG-----

ATGTTAAACTTCGTTTAAACGATGTGGTAGAAAGCAACGT-----

TTTTATGATCCGATAAAGAATCAAACCTTGTTTAAATGTTCCAGCTATTCTCTATTTCTTGAAAA-----

GGTGCTCAACCTACAAGAACCGTTTCTGATATTTTAAAGGAAGGCGGAATTCCTT---AAAGAA-----

-----AAAGAA---AGAACTTTGAGTTAA-----

ATGTATACA-----

TCTAAACAACCTTTTCATAAATCCAAACAAACTTTTCATAAATCCAAGCAAACCTTTTCGTAATCCAAGCAAACCTTTTCG

TAAATTCAAACAACCTTTTCGCAAACCCAAACAACCTTTTCGT-----

AGGCGT-----CCTCGG---ATT---

GGCCCCGGGGGATCGAATTGATTATAGAAACATGAGTTAATTAATCGATTTATTAGTGAACAAGGAAAAATATTATCGAG

ACGAATAAATAGATTAACCTTGAACAACAACGATTAATTACTCTTGCTATAAAACAGGCTCGTATTTTATCTTTCTTAC

CATTTTCGT---AACTATGAG-----AATGAGAAA-----

-----CAATTTCAA---GCCAGTCAATTTCA-----ATAATTACA-----GGTCTAGACCCAGA-----

AAAAATAGACATATTCCTCCATTAACACAAAAGTTCAATTCGAATCGAAACTTAAGAAACTCCAACCAGACTTTAAGAAA

CACCAATCGGAACTTAAGTTCCGATTGTGTGACACGA-----AAAAAACG-----

AATCCTTTTGTAGCTCATCATTTTATTGGCAAAAAATAGAAAAGGTCAATATGAAGGAGGAGAAAGAAACAATAGTAACGTG

GTCCCAGGATCTAGCATTCTACCCGCAATGGTTGGCCATACAATCGCGATTATAATGGAAAGGAACATATACCTATTT

ACATAACAAATCCTATGGTAGGTCGCAAATTTGGGGGAATTCGTACCAACTCGGCATTTTC---ACGAGTTATGAAAGT---

GCAAGAAAGGATACTAAATCTCGTCGT-----

Panax

GAAATGCGCTTGGATAACATCCTTTTTTCGATTGGGTATGGCTCCGACTATTCCCGGAGCCCGTCAATTAGTTAACCACAG

ACATATTTTAGTCAATGGTCGTATAGTAGATATAGCAAGTTATCGCTGCAAACCCGAGATATTATTACGGCGAGGGATG

AAGAAAACCTCTAGAACTCTGATTCAAATTTCTCTCGATTCTGTCCTCTCATGAC-----

GAATTGCCAAAACATTTGACTCTT-----CACCCATTCCAA-----

TATAAAGGATTAGTCAATCAAATTATAGATAGTAAATGGGTTCGGTTTGAAA---

ATAAATGAATTGCTAGTCGTAGAATATTATTCGCGCCAGACT-----

ATGTCACGTCGAGGTACTGCAGAAGAAAAAACTGCAAAATCCGATCCAATTTATCGTAATCGATTAGTTAACATGTTGGT

TAACCGTATTCTGAAACACGGAAAAAAATCATTGGCTTATCAAATTATCTATCGAGCCGTGAAAAAGATTCAACAAAAGA

CAGAAACAAATCCACTATCTGTTTTACGTCAAGCAATACGTGGAGTAACTCCCGATATAGCAGTA-----

AAAGCAAGACGT---

GTAGGTGGATCGACTCATCAAGTTCCCATTGAAATAGGATCCACACAAGGAAAAGCACTTGCCATTGTTGGTTATTAGC

GGCATCCCGAAAACGTCCGGGTGCAAAATATGGCTTTCAAATTAAGTTCCGAATTAGTGGATGCTGCCAAAGGGAGTGGCG

ATGCC---ATACGCAAAAAGGAAGAGACTCATAGAATGGCAGAGGCAAAATAGAGCTTTTGCACATTTTCGT-----

ATGGGTAGGGATACTATTGCTGACATAATAACCTCTATACGAAATGCTGATATGGATAAAAAAAGAGTGGTTTGAATAGC

ATCTACTAATATC-----

ACTGAAAATGTTGTTAAATACTTTTACGAGAAGGTTTTATCGAAAACGTGAGAAAACATCAAGAAAACAAAAAG-----

-GATTTTTTGGTTTTAACCTACGACAT-----AGAAGGAATAGGAAAAGG-----CCTTATAGAAAT-----ATT-

-----

TTAAATTTAAAACGGATCAGTCGGCCTGGTCTACGAATCTATTCTAACTATCAACGAATTCCTAGAAATTTGGGCGGGAT  
CGGAATTGTAATTTCTTTCTACTTCTCGAGGTATAATGACAGACCGAGAGGCTCGACTAGAAAAGAATTGGCGGAGAAATTT  
TGTGTTATATATGG---ATGGCAAAGCTATACCGAGAAGTGGT---TCACGT-----  
AGGAGTGGGCGTATTGGTTCACGTAAGAGTACACGTAGA---  
ATACCAAAGGGGGTTATTCATGTTCAAGCAAGTTTTCAATAATACTATTGTGACTGTTACAGATGTACGGGGTTCGGGTGGT  
CTCTTGGTCTCTGCCGGTACTTGTGGATTCAAGGGTACAAGAAGGGGGACGCCGTTTGCTGCTCAAACCGCAGCAGGAA  
ACGCTATTTCGTACAGTAGTGGATCAA---  
GGTATGCAACGAGCAGAAGTCATGATAAAAAGGACCCGGTCTCGGAAGAGACGCAGCATTACGAGCTATTTCGCAGAAGTGG  
TATACTATTAACTTTCGTGCGGGATGTAACCCCATGCCACATAATGGCTGTAGACCTCCGAAAAACGACGTGTG---  
ATGCCAACCTTAAACAACCTATTAGAAATACAAGACAGCCAATCAGAAATGTCACGAAATCCCCCGCGCTTCGGGGATG  
CCCCCAGCGTCGAGGAACATGTAAGGTTGAT-----  
ACTATCACCCCAAAAAACCAACTCTGCCTTACGTAAAGTTGCCAGAGTACGATTAACCTCTGGATTTGAAATCACTGC  
TTATATACCCGGTATTGGCCATAATTCACAAGAACATTCTGTAGTCTTAGTAAGAGGGGGAAAGGGTTAAGGATTTACCCG  
GTGTGAGATATCACATTGTTTCGAGGAACCCTAGATGCTGTCGGAGTAAAGGATCGTCAACAAGGGCGTTCTAAATATGGA  
GTAAAAAAGCCAAA-----  
-----  
ATGGCAAGGAAAAGTTTTGATTTCAGAGGGAGAAGAAGAGGCCAAAAATTGGAACAGAAATATCATTTCGATTTCGCCGATCCTC  
AAAAAAGAAATA---AGCAAAGTTCTATCGTTAAGC-----GACAAATGG-----  
GAAATTTATGGAAAGTTACAATCCCCACCGCGGAATAGTGCACCTACACGTCTTCATCGACGTTGTTTTTCGACCGGAAG  
GCCGAGAGCTAACTATCGAGACTTTGGACTATCCGGACACATACTTCGTGAAATGGTTCATGCATGTTTGTGGCCAGGGG  
CGACAAGATCAAGTTGG-----ATGATAAAA---  
AATCCATTTCAGTGGG-----ATTATTTTG-----AAAGAGGAAAACAAAGAC---AAC-----AGGGGG---  
TCTGCTGAATTTCAAGTAGTTCAGTTTACCAATAGGATACGAAGACTTACTTCACATTTGGAATTGCACAAAAAAGACTA  
TTTATCTCAGAGAGGTCTGCGTAAAATTCTAGGAAAGCGTCAACGGCTACTGGCTTATTTGTCAAAAAAATAGAGTAC  
GTTATAAAGAATTA-----ATTGGTTCGGTTGGATATTCGAGAAAACAAAATTCGT-----  
ATGGTAAAACCTTCGTTTGAACGATGTGGTAGAAAGCAACGAGCCGTCTATCGAATCGTTGCAATTGATGTTTCGATCCCG  
AAGAGAAGGAAGAGATCTTCGGAAAGTGGGTTTTTATGATCCGATAAAGAATCAAAGTTGTTTAAATGTTCCCGCTATTC  
TATATTTCTTGAAAA-----GGCGCTCAGCCGACAGGAAGTTCGGGATATTTTAAAGAAGGCGGAGGTTTTT---  
AAGTAA-----  
-----ATGGATAAA-----TCCAAGCGACCTTTTCTTAAATCCAAGCGATCTTTTCGT-----  
-----  
-----AGGCGTTTG---CCCCG---ATC---  
CAATCGGGGGATCGAATTGATTATAGAAACATGAGTTTAATTAGTCGATTTATTAGTGAACAAGGAAAAATATTATCTAG  
ACGGGTGAATAGATTGACCTTGAAACAACAACGATTAATTAATGCTATAAAACAAGCTCGTATTTTATCTTTGTTAC  
CTTTTCTT---AAT-----AATGATAAA-----  
-----  
-----CAATTTGAAAGAACCGAGTCGACCGCT-----AGAACTGCT-----GGTCTTAGAGCCAGA-  
-----AAAAA-----  
-----GTGACACGTTCA-----CTAAAAA-----  
-----  
AATCCTTTTGTAGCAAATCGTTTATTAAGAAAAATTGATAAGCTTAACACAAAAGCAGAAAAAGAAATAATAATAACTTG  
GTCCCGGGCATCTACCATTATACCCACAATGATAGGCCATACTATTGCTATCCATAATGGAAAGGAGCATTTCGCTATTT  
ATATAACGATCGTATGGTAGGCCACAAATTTGGGAGAATTTGCACCTACTTTAAATTTT---CGA-----GGACAT---  
-----  
GCGAAAAGCGATAATAGATCTCGTCGT-----  
-----  
ATGATTTTGAATCTTTTCTACTAGGTAATCTAGTATCCTTATGCATGAAGATAATC-----  
AATTCGGTTCGTTGTGGTC-----  
GGACTCTATTATGGATTTCTGACCACATTCTCCATAGGGCCCTCTTATCTCTTCTTCTCCGAGCTCGGGTTATG-----  
----GAAGAAGGAGAAGAAGGAACCGAGAAGAAGGTATCAGCAACAACA---  
GGTTTTATTACGGGACAGCTCATGATGTTTCATATCGATCTATTATGCGCCTCT  
Pelargonium  
GAAATGCGTTTGGATAATACCCTTTTCCGATTGGGTATGGCTTCGACTATTCTCAAGCCCGCCAATTAGTTAATCATAG  
ACATATTTTAGTAAACGGTCGCATAGTCGATATACCAAGTTATCGCTGCAAACCCGAGATCTTATTTTCAGGGAGGGAGA



AAGAAAAATCAAAAGCTCTGATTCAAATTATCTTGATTCAACCGCCAAGAGACCAATACCACTACCAAAACATTTACTT  
CTTTTTCATAGTGATGACCCACGCGAC---  
TTATTAAGGGAAGCGTCAAGAAAATAATAGATAGGAAAGAGGTTCGGTTTAAAAAAAATAAAGGAATTGTTGGTCATAGA  
ATATTATTCTCGTCAGATTTACCCTAAATGTCACGCCGAGGTCTGCAGAAAAAAAACACTGTCAAACGCGATCCATTTT  
ATCGTAATCGAGTAGTTAACATGTTGATTAACCGTATTCTGAAACACGGAAAAAAATCATTGGCTTATAAAATTCTCTAT  
CGAGCCATGAAAAAGATTCAACAAAAGAAAAAAGAAATCCACTATCTATTTTACGTCAAGCAATACGTCGAGTAACTCC  
CAAGATAGCAGTA-----AAAAGAAGACGT---  
GTAAGCGGATCGGCTTATCAAGTTCCCATTGAAATAAAAGCCCCACAAGGAAAAGTACTTGCCATTGCTTGGTTATTAGA  
GGCAGCCCGAAAACGTCCGGGTCGAAATATGGCTTTCAAATTAAGTTCCGAATTAATGGATGCTACCAAAGGGAAGGGCA  
ATGCC---ATACGCAAAAAGGAAGAGACTTATAGAATGGCAGAGGCAAATCGAACTTTTGCAAATTTTCGTTAA-----  
---  
ATGGGTAAGGACACTCTTTCTGAAATAGTCACATCTATACGAAATGCCGATATGGCTAAAAAAGAGACGGTTCGAATAAC  
ATTTACTAACATC-----  
GCCCAAAACATTGTGACAATACTGTTACGAGAGGGTTTTATCAAAAATGCGAGGGAACATCGGGAAAGCAAAAA-----  
-TCCTTTTTGGTTTTAACCTACGCCAT-----AGAAGGAATAGAAAGGGT-----CCGTCTAGAACT-----CTT-  
-----  
TTCAATTTAAAACGGGTCAGTCGACCCGGTCTACGAATCTATTCTAACTATCAAAAAATTCCTAGGATTTTGGGCGGGAT  
GGGGGTTGCAATTCTTTCTACTTCTAAAGGTATAATGACAGACCGAGAGGCTCGATTAAGAAGAATAGGTGGAGAAATCT  
TGTTGTATATCTGGTAAATGGCAAAAACGATACGAAGATATAGT---TCATTT-----  
AGATTGAGGAATAGACGCATTCGTTTCGCGTAAGAGTGCACGGAAA---  
ATACCCAAAGGAATTATTCACGTTCAAGCAAGTTTCAGCAATACCATTGTTACTGTTACAGATGTAGGGGGTTCGGGTGGT  
TACTTCGGCCTCTGCCGGCGCTTGTGGATTCAAGGGTAGAAGAAGGGGTACGCCCTTTGCCGCCAAACAACCGCCGAAA  
ATGCTATTTCGCACAGTAGTAACTCAA---  
GGTATGCACCGAGCTGTTGTCTTAGTAAAAGGTGTTCGGTTCGTGGGAGAGATGCGGCATTACGAGCTATTTTGAGAAGCGG  
TGTGCGGTTGCATTTGTTACGAGATAGAACCCTTTACCACACAATGGGTGTAGGCCTCCTAAAAGAAGACGTACGTAGA  
TGCCAACTAGTAACCAACTTCTTAGAACTCAAGACAGCCAGTCAGAAAAACCAAGAAAACCCCGCTCTTAGGGGATGC  
CCTCAGCGCCGAGGAAGATGTAGTAAGGTGTAT-----  
ATTATCAACCCCAAAAACCAAACTCTGGCAATCGTAAAGTTGCCAGAGTACGATTAACCTCTGGATTTGAAATCACTGC  
TTATATACCTGGTGTGGCCATAATGTACAAGAACATTCTGTAGTCTTAGTAAGAGGGGGAAGGGTTAAGGATTTACCCG  
GTGTGAGATATCACATTGTTTCGAGGAACCCTAGATGCTGCCGGAGTCAAGGATCGTAAACAAGGGCGTTCTAAATATGGG  
GTCAAAAAGCCAAAATA-----  
-----  
GTGGCAAAGAAATGTTGGATTAGAGGGGAGAAGAAGAGACAAAAATTTGGAACAAAAATATCGTTTTGATTGCGCCGATCCTC  
AAAAAAGAAATA---CGCGAAGTTACGTCCTTGAGT-----GAGAAATGG-----  
GAAATTCAGAGAAAGTTACAATCCTCACCGCGCAATAGTGCACCTACACGTCTTCGTCGACGTTGTTTTTCAACCGGAAG  
ACCGAGAGCTACCTATCGAGACTTTGGACTATCGAGACACATACTTCTTAAATGTTTCGTGCGGGTTTTGTTGCCGGGG  
CAACAAGATCGAGTTGGTAA-----ATGGTCAA-----  
ACTCCATTAATTTCA-----GTTATCTCG-----CAAGAAGAAAAAGAAAAG---AAT-----AGAGGG---  
TCCGTTGAATTTCAAGTATTGTGTTTTACCAAGAAAATAGACCAAATTTCTTCCATTTGAAATTGCACAGAAAGGACTA  
TTTATCTCAGAGAGGTCTACATAAAATTTGGGAAAACGCCAGCGTCTGCTGTCTTATTTGTCAAAGAAAATAGAGTAC  
GTTATAAAGAATTA-----ATAAATAGGTTGAATATTCGCGAGTCAAAAACCTCGTTAA-----  
ATGGTAAACTTCGTTTGAACGCTGTGGACGAAAGAAACGAGCGGTTTATCGAATCGTTGCAATTGATGTTCCGATCCCG  
AAGAGAAGGAAGGGATCTTCGAAAGGTGGGTCTTTATGATCCGATAAACAATAAAACCCATTTAAATGTTTCTGCTATTC  
TATATTTTATTGAAAGA-----GGCGCTCAACCTACAAGAAGTGAATGATCTTTTAAAGAAGGCGGGGATTTTG---  
AAGGATACAGGGATTCCCGTTGTTGGAACCTTTAGTA-----TCAAAATA-----  
-----ATGGAATAGAGGAATCTAAT-----  
TTGAAATGGCTACGCACCTGAATTTATCGCAACCAAGAAACCTCCGGAACCCAAAGCACCTCTGCAACCCCGCTACCTCC  
TTCGAAAAGGAAAGGCAAGCCCCGAAATCTCCTCGGCGCGTTTCG---TCCCGA---ATC---  
AAACCAGGGGATCTAATTGATTATAGAAAACATTAGTTAATTGGTCGATTTATTAGTCAACAAGGAAAAATCTTATCTAG  
ACGGGTGAATAGAGTGACTTTAAACAACAACGACGTCTTACTATTGCTATAAACAAGCTCGTATTTTATCTTCGTTAC  
CTTTTCAC---GCT-----ACTGATCAACTTTTCAAAATAAAAAGAAAAATA-----  
-----  
-----AAAAGAAGGGAGTCGACCGCCAGAAAAAAGAGAAAAAAG-----GGCTTTAGAAAAAGA-  
--CCAAAAAATAG-----

-----GTGTTCCCTTCA-----  
TTTAAAAAAAAAAAAAAAAAAGCCGTTCCCTTCAGTAAAAAGAAACCCTTTTGTAGCGAATCCGTTATTAAGAAAATCGA  
GAAACTGAATGCCAAGGCCAGAAAGATTTCTCAAACCTTGGTCGCGTGCATCTACCATTATACCCGCAATGATCGGAT  
ACACTATTTATATCCATAACGGGAGGGAACATGTGCCTATTCTATAACGAAATATATGGTCAATTATAAATTGGGAGAT  
TTTGTACCCACTAGAATTTTT---AAT-----  
CAACACAACCTCTAAAAAAAAAAGTGATACTAAATCTGTTAAAAGCAAAAGTGATACTAAATCTGTTAAAAGCAAAAGGGA  
TACTCAATCTCGTCGTTAA-----  
ATGAACCATATCACGAGTAAGCGTCTTGATATTCGGGCAACTTTGATT-----  
-----TTC-----  
GGTATTTTTTATGGAATACTCATAACATTTTTCAAACCTCACAAGTTATCTTTTCTTATCCGGCACTGGATTTCT-----  
----CAAGAC---GACGAAGGGACTGGTAAGGCGAGAGCACTAAGCTAT---  
GGGTTCACTGTGGGCATTTGCTGGGCTATTTATTGATTTATTACTTACCTT  
Phalaenopsis  
GAGATGCGTTTGGATAACATCCTTTTTTCGATTAGGAATGGCTTCGACCATTCCAGGAGCCAGACAATTAGTTAACCATAG  
ACACATTTTTAGTTAATGGTCGTATAGTGGATATACCAAGTTATCGTTGCAAACCCCTAGATATTATTACTACGAAGGATA  
AAGAAAGATCGAAAGCTCTGATTCAAATTATCTTGTTCATCCCCCGCGG-----  
GAATTGCCAAACCATTTGACTATT-----GACTCCTTACAA-----  
TATAAAGGATTTGTAAATCAAATAATAGATAGTAAATGGATCGGTCTAAAA---  
ATAAATGAGTTGTTGGTCGTAGAATATTATTCCCGTCAGACT-----  
ATGTCACGTCGAGGTACTGCAGAAGAAAAAACTGCAAATCCGATCCAATTTATCGTAATCGATTAGTTAACATGTTGGT  
TAACCGTATTCTGAAAAATGAAAAAAATCATTGGCTTATCAAATTATCTATCGAGCCGTGAAAAAGATTCAACAAAAGA  
CAGAAACAAATCCACTATCTGTTTTACGTCAAGCAATACGTGGAGTAACTCCCGATATAGCAGTA-----  
AAAGCAAGACGT---  
GTAGGCGGATCGACTCATCAAGTTCCTATTGAAATAGGATCTACACAAGGAAAAGCGCTTGCCATTGTTGGTTATTAGG  
GGCATCCCGAAAGCGTCCGGGTCGAAATATGGATTTCCGATTAAGTTCGCAATTAGTAGATGCTGCCAAAGGCAGTGGCG  
ATGCC---ATACGCAAAAAGGAAGAGACTCATAGAATGGCAGAGGCAAAATAGAGCTTTTGCGCATTTTCGT-----  
---  
ATGGGTAGGGACATTATTGCCAATATAATAAATTCTATAAGAAATGCTGACATAGATCAAAAGGGAAGAGTTAAAATAGT  
ATCTACTAATATC-----  
ACTAAAAACATTGTGAAATACTTTTACGAGAAGGTTTTATTGAAAACGTTGAAAACATCAAGAAAGTCAAAAA-----  
-AATTTCTTGGTTTCAACCTTACGACAT-----AGAAAGACTAGGAAAGGT-----AATAAAATAAAT-----  
-----  
TTAAAGCGTATCAGCCGACCTGGTCTACGAATATATTCCAACCTATCAACAAATTCCTAAGATTTTAGGTGGAATGGGAAT  
TGTAATCCTTTCTACTTCTCGAGGTATAATAACAGATCGAGAAGCTCGATTAGAAAAAATTGGAGGAGAAATTTTGTGTT  
ATATATGG---ATGACAAAACCTATAGCAAAAATTAGT---TTACGT-----  
AAGAATGCACGTATTGGTTCAAATAAGAATGAACGTAGA---  
ATACCAAAAGGAGTTATTCATGTTCAAGCGAGTTTTCAATAATACTATTGTAAGTGTACAGACGTACGAGGTGCGGTGGT  
TTCTTGGGCTTCCGCAGGTACTTCTGGATTGAGAGGCACAAGAAAAGGAACACCCTATGCTGCTCAAGCCGAGCATTTA  
ATGCTATTCGTACATTAGTTGATCAG---  
GGTATGCAACGAGCAGAAGTTATGATAAAAGGTCCAGGTCTCGGAAGAGATGCGGCATTACGAGCTATTCGTAGAAATGG  
GATACTATTAAGTTTTCGTACGTGATGTAACACCCATGCCGCATAATGGATGTGCCCCCTAAAAAAGACGTGTG---  
ATGCCAACCATTAACAACCTTATTAGAAACGCAAGACAGCCAATAAGAAATGTCACGAAATCTCCCGCTCTTCGAGGATG  
TCCTCAGCGTCGAGGAACATGTACTAGGGTGTAT-----  
ACTATCACCCCCAAAAACCAAACCTCTGCCTTACGTAAAGTTGCCAGAGTACGATTAACCTCTGGATTTGAAATCACTGC  
TTATATACCTGGTATTGGCCATAATTCACAAGAACATTCTGTAGTATTAGTAAGAGGAGGAAGGGTTAAGGATTTACCCG  
GTGTGAGATATCACATTGTTTCGAGGAACCCTAGATGCTGTGCGAGTAAAGGATCGCCAACAAGGGCGTTCTAAATATGG  
GTCAAAAAGCCAAAA-----  
-----  
ATGGCAAGAAAAAGTTTTGATTCAAAGGGAGAAGAAGCGCCAGAAATTGGAACAGAAATATTATTGGATTCGTCAATCCTT  
AAAAAAGAAATA---AGCAAAGTTCCTCGTTGAGG-----GAACAATGG-----  
AAAATTCATGGAATTTGCAATCCTCACCAGTAATAGTGCGCCTATACGTCTTCATCGACGTTGTTTTTTAACCGGAAG  
ACCTAGAGCGAACTATCGAGACTTTGGACTATCTGGACACATACTTCGAGAAATGGTTCATGCATGTTTGTACCAGGCG  
CAACAAGATCAAGTTGG-----  
ATGGTAAAAAAATTCATTCATCTCA-----GTTATTACA-----CAAGAAGAAAAAGAAGAA---AAT-----  
AGTGGA---  
TCTGTTGAATTTCAAGTATTCCATTTACCAGTAAGATACGGAGACTTACTTCACATTTAGAATTGCACAAAAGAGATTT  
TTTATCACAAAAGGTCTACGAATAATTCTAGGAAAACGTCAACGATTATTGACTTATTTGTCAAAGAAAAATAAAGTGC

GTTATAAGAAATTA-----ACGGATCAATTAATATTAGGGAACCAAAAATTTCT-----  
ATGGTAAAACCTTCGTTTGAACGATGTGGTAGAAAGCAACGAGCCATCTATCGAATCGTTGCAATTGATGTTCCGATCCCG  
AAGAGAAGGAAGAGATCTTCAAAAAGTGGGTTTTTATGATCCGATAAAGAATCAAACCTATTCAAATGTTCCCTGCTATCT  
TATATTTCCCTTGAAAAA-----GGTGCTCAACCCACAGAACTGTTTATGATATTTAAGGAAGACAGAATTCCTT---  
AAAGAA-----TTTCGA-----ATTTCTTTTGATAAAAAA---AGAAAAGAAAAACAAGAATCATGA--  
-----ATGGATAAA-----TCCAACAACCTTTTCGTAATCCAAGCGATCTTTTCGT-----  
-----AGGCGTTTA---CCCCA---ATC---  
GGATCGGGGGATCAAATCGATTATAGAAACATGAGTTTAATTAGTCGATTTCTTAGTGAACAAGGAAAAATCTTATCTAG  
ACGGACGAATAGATTGACTTTGAAACAACAACGATTAATTACTATTGCTATAAAACAAGCTCGTATTTTATCTTTGTTAC  
CTTTTCGT---AAT-----AATGAGAAA-----  
-----  
-----CAATTGGAGAGAGTGGAGTCGATTCT-----AGAACTACT-----GGTCCTAGAACCAA--  
-----AATAAA-----  
-----GTGACACGTTCA-----CTAAAAAAA-----  
-----  
AATCCTTTTGTAGCTAATCATTATTGGGAAGAATTGAAAACTCAACAGGAGGGAGGAGAAAGAAATCATAGTGACTTG  
GTCTCGGGCATCTACCATTATACCCACAATGATTGGCCATACAATCGCTATTATAATGAAAGGAACATTTACCTATTT  
ATATCACAGATCGTATGGTCGGTCACAAATTGGGAGAATTCGCACCTACTCTCACTTTC---GTG-----AGACAC---  
-----  
GCGAGAAACGATAAGAAATCTCGTCGT-----  
-----  
ATGATTTTTAAATCTTTTCTACTAGGTAATCCATTATCCTTATGCATGAAAATAATA-----  
AATTCGGTCGTTGTGATC-----  
GGGCTCTATTATGGATTTATTACCACATTCTCCATAGGGCCCTCTTATCTCTTATTTCTCCGAACCTGGATTATG-----  
-----GAAGAAGTA-----AATGAAAAGGAGATATCCGCAACAACT---  
GGTTTTATTGCGGGACAGCTCATGATGTTTCATATCGATCTATTATGCGCCTCT  
Pinus GAAATGCGTTTTGGATAA-ATC-TTTTTCGATTGGGTATGGCT-CCACA--TCC-  
GGAGCTAGACAATTAGTGAATCATGGACATATCCGGGTCAATGACCATATGGTAGATATACCAAGTTACCCCTTGCAAACC  
TCAAGATGTGATTACTATAAGAGATCAACAAAGATTGAGAGCTATCATTAAGAAGAATATAGATCTGTTCCAGAGGGAT-  
-----AAATTGCCAAATCATTGACTTTT-----CATTCTTACAA-----  
TATAAAGGATTCATCAATCAAATAATAGATAGTAAATGGATCAATTTGAAG---  
ATTAATGAATTGCTGGTCGTAGAGTATTATTCCTGCAAGCT-----  
ATGTCACGGCGAAGTACTGCAGAAAAAAAAAACTGCAAAATCCGATCCTATTTATCATAATCGATTAGTTAACATGGTGGT  
TAACCGTATTCTTAAAAACGGAAAAAAATCATTGGCTTATCGAATCTTTATCGAGCCATCAAAAAGATTCAACAAAAGA  
CGGATAAAAATCCACTATCTGTTCTACGCCAAGCAATACGTAGAGTAACTCCCAATGTAACAGTA-----  
AAAGCAAGACGT---  
GTGGGTGGATCGACTTATCGAGTTCCCCTGAGATAAGATCAACCCAAGGAAAAGTACTTGCCATTGCTTGGTTATTAGG  
GGCATCTCGAAAACGTCCGGGTGCAAAATATGAATTTCAAATTGAGTCACGAATTAATGGATGCTGCTAGAGGGAATGGCA  
ATGCT---ATACGCAAAAAGGAAGAGACTCATAGAATGGCAGAAGCCAATAGAGCTTTTGCACATTTTCGT-----  
---  
ATGGGTAACGATACTATTACCAATCTAATTACTTCTATAAGAAAACGCTGACATGGTAGAAAAAGGAACGGTTCGAGTAAC  
AGCTACTAATATT-----  
ACCAAGAACATTGGAAGGATCCTTTTACGAGAAGGTTTTATAGAAGATGTTAGGGAACATCAGGAAGGCCAAAAA-----  
-TATTTTTTGATATCGACTTCAAAATAT-----CGGAGAAGGAAGAAAAGG-----ACATATATGACC-----ACG-  
-----  
TCAAAGCGTACCAGCAAACCTGGTTGAGAATTTATTCTAATTATCGAGAAATTCCAAAAGTTCTAGGTGGAATGGGGAT  
CGTAATTCTTTCTACTTCCCAAGGAATTTTGACGGATCGAGAAGCTCGACAGAAAAAAATTTGGAGGAGAAATTTTATGTT  
ATGTATGG---ATGTCAAAAACATAAAAAGAATTGGT---TCACGT-----AGGAAT---  
-----GAACATCGA---  
GTACTIONAAGGAGTTATTTACGTTCAAGCAAGTTTTAACAATACCATAGTGACTGCTACAGATGTACGGGGACAAGTTCT  
TTCTTGGTCTTCTGCTGGTGCCTGTGGATTCAAAGGTACAAGGAGAGGTACACCATTTGCTGCCAGACTGCAGCAGAAA  
ATGTTATTCGTGCATTAATGGATCGG---  
GGTATGGAACGAGTAGAAGTTATGATAAGTGGCCCTGGTCGAGGGAGAGATACAGCATTACGAACCATTTCGTAGAAGTGG

CATACTATTAAGTTTTGTACGTGACGTAACCCCTATGCCACATAATGGATGTAGACCTCCCAAAAAGAGACGTGTG---  
ATGCCCACTATTCAACAACCTTATTAGAAATGCAAGACAGCCAATAGAGAATAGAAAAAATCTCCTGCTCTTCGAGGATG  
TCCTCAGCGTAGAGGAGTATGTGCTAGGGTGTAT-----  
ACTATCACCCCCAAAAAACCAAACTCTGCCTTACGTAAAGTTGCCAGAGTACGATTAACCTCTGGATTTGAAATCACTGC  
TTATATACCTGGTATTGACCATAATTTACAAGAACATTCTGTAGTATTAGTAAGAGGAGGAAGGGTTAAAGATTTACCCG  
GTGTGAGATATCACATTGTTTCGAGGAACCCCTAGATGCTGCCGAAGTAAAAGATCGTCAACAAGGGCGTTCTAAATATGGA  
GTA AAAAAGCAAAA-----

ATGGCGAGAAAAGAGTCTCATTTCAGAGAGAGAAGAAGAGACAAGCACTGGAACGGAAATATCATTTAATTCGTCAATCTTT  
GGAG---GAAAA---AGCAAAGTGTCACTATTGGAT-----GACAAATGG-----  
GAAATTCATAGAAAATTGCAATCTTCACCACGTAATAGTGCACCTACACGTCTCCATCGACGTTGTTCTTCGACTGGAAG  
ACCTAGAGCCAACCTATCGAGACTTTGGATTGTCCGGACACATACTCCGTGAGATGGCCCACGCATGTTTATTGCCCGGA  
TAAAAAATCGAGTTGG-----ATGATCAAT---  
AATTTGTCCATTAGTTCATCTCTGATTCCCGATAAACAG-----AGAGGA---  
TCTGTTGAATCTCAGGTATTTTATTTAACCAATCGGGTCTTAAGACTTACCCAGCATCTGCAATTGCACGGAAGAGACTA  
TTCATCCCAAAGGGGTTTGTGGAAAATTTGAGCAAACGTAAGCAACTTCTGGTTTATCTATCCAAGAGGGATAAACTTC  
GTTACGATGATTTA-----ATTGGTCAATTGGGTATCCGTGGGCTAAAAACCCGT-----

ATGAAACAACTATGGATAAACCCAAGCAATCTTTTCGTAGACATTTTAAACCAATTCGCAGACGTTTTAAACCAATTCG  
TAGATATTTGAAACCAATTCGT-----  
AGACATTTG---TCACCT---ATT---  
AGGTCGGGAGATCGGATCGATTATAAAAATATGAGCCTAATTAGTCGATTTATTAGTGAGCAAGGAAAAATATTATCCGG  
CCGAGTGAATAGATTAACCTTCAAAACAACAACGTCTAATGACTAACGCTATTAACGAGCTCGTATTCTATCTTTGTTAC  
CTTTTCTT---TAT-----AATGAAAAC-----

-----ATGGCACGTTCA-----CTGAAAAA-----

AATCCTTTTGTGGCTAATCATTTCATTGAGGAAAATTTAAAAATCTAAACATAAAAAGAAGAAAAGAAGATAATAGTTACTTG  
GTCCCAGGATCCGTCATTGTACCCGCAATGATCGGTCATACAATTGCTGTTTCATAATGGGAGGGAACATTTACCCATTT  
ATGTAACAGATCGTATGGTAGACCACAAATTGGGGGAATTTGCACCTACCCTACTTTTT---CAG-----GGACAT---  
-----  
GCAAGAAACGATAAGAAATCTCGTCGT-----

ATGATAAAAGTACTTGGTCTACTATTGGGTCCATTATCCTCATGGGTAGAAGTTTCA-----  
GGTCCGATCATCATATTT-----  
GGGCTATATTATGGATTTCTTGCTACATTGCCTTTTGGTCCCTCTAAAATCTATTCCACGAGATCCTTCCTTTTG-----  
-----GGAAAA-----CCTGGCTATGGTATAATAGCCATAAGT---  
GGTTCTATTACGGGACAATTAATAGGATTTTTGTCCATGTATTATTTCGCCAT

Piper

GAGATGCGCTTGGATAACATCCTTTTTCGATTGGGCATGTCCTCGACCATTCCCGGAGCCAGACAATTAGTTAACCACAG  
ACACGTTTTAGTTAATGGGCGTATAGTAGATATCCCAAGTTATCGCTGTAAACCTCGCGATATTATTTCTACGAGAAATG  
AACAAAGATCCAAAGTTTTGGTTCAAATTTCTATGGATTCTGCTTCCCGCGAA-----  
GAATTGCCAAAACATTTGACTCTT-----GACTCGTCCCAA-----  
TATAAAGGGGTAGTAAATCAAATAATAGATAGTAAAGGGGTGCGTTTAAAA---  
ATCAATGAGTTGCTAGTCGTGGAATATTATTACGTCAGACT-----  
ATGTCACGTCGAGGTACTACAGAAGAAAAAACTGCAAAATCCGATCCAATTTATCGTAATCGATTAGTTAACATGTTGGT  
TAACCGTATTCTGAAACACGGA AAAAATCATTGGCTTATCAAATTATCTATCGAGCCGTGAAAAAATTCACAAAAGA  
CAGAAACAAATCCACTATCTGTTTTACGTCAAGCAATACATGGAGTAACTCCCGATATAGCAGTA-----

AAAGCAAGACGT---  
GTAGGCGGATCGACTCATCAAGTTCCCATTGAAATAGGATCTACACAAGGAAAAGCACTTGCCATTTCGTTGGTTATTATG  
GGCATCCCGAAAGCGTCCGGGTGCAAAATATGGCTTTCAAATTAAGTTCCGAATTAGTGGATGCCGCCAAGGGGAGTGGCG  
ATGCC---ATACGCAAAAAGGAAGAGACTCATAGAATGGCAGAGGCAAATAGAGCTTTTGCACATTTTCGT-----  
---  
ATGGGTAGGGACACTATTGCTGATATAATAACTTCGATAAGAAATGCTCATATGGATAAAAAAGGAACGGTTCGAATAGC  
ATCTACAAATATG-----  
ACCGAAAACATAGTTAGAATACTTTTACGAGAAGGCTTTATTGAAAACGTTAGGAAACATCGAGAAAATCAGAAA-----  
-AATTTCTTGGTTTCAACCCTACGACAT-----AGAAGGAATAGGAAAGGA-----ACATCTAGAACT-----ATT-  
-----  
TTAAATTTAAAGCGTATCAGCCGACCGGGTTTACGAATCTATTCCAATATCAAAAAATACCTAGAATTTTAGCGGGAAT  
GGGGATTGTCATTCTTTCTACTTCTCGAGGGTAATGACAGATCGTGAAGCTCGACTAGAAGGCATTGGAGGAGAAATTT  
TGTGTTATATATGG---ATGACAAAACCTATACCAAGGATTGGT---TCACGT-----  
AGAAGTGGGCGTATTGGTTCACGTAAGGCTGGGCGTAGA---  
ATACCAAAAGGGGTTATTCATGTTCAAGCGAGTTTCAACAATACCATTGTGACTGTTACAGATGTACGAGGTCGAGTCGT  
TTCTTGGTCTCCGCCGGTACTTGCAGGATTCAAGGGCACCAGAAGAGGGACACCCTTTGCAGCTCAAACCGCTGCGGGAA  
ATGCTATTTCGTACAGTAGTAGATCAG---  
GGTATGCAACGAGCAGAAGTCATGATAAAGGGTCTGGTCTCGGAAGAGATGCAGCATTGCGGGCCATTTCGAGAAGTGG  
TCTACTTTTAAAGTTTCGTACGTGATGTAACCCCAATGCCACATAATGGATGTAGACCCCTAAAAAAGGCGTGTG---  
ATGCCAACTATTAACAACCTATTAGAAACACAAGACAGCCAATCCGAAATGTCACGAAATCCCCTGCTCTTCGGGGGTG  
TCCTCAGCGCCGAGGAACATGTACTAGGGTGTAT-----  
ACTATCACCCCAAAAAACCAACTCTGCTTTACGTAAAGTTGCCAGAGTACGATTAACCTCGGGATTTGAAATCACTGC  
TTATATACCTGGTATTGGCCATAATTTACAAGAACATTCTGTAGTCTTAGTAAGAGGGGGAAAGGGTTAAGGATTTACCCG  
GTGTGAGATATCACATTGTTTCGAGGAACCCTAGATGCTGTGCGGAGTAAAGGATCGTCAACAAGGGCGTTCTAAATATGGG  
GTCAAAAAGCCAAA-----  
-----  
ATGGCAAGGAAAAGTTTGATTTCAGAGGGAAAAGGAAGAGGCGAGAAATTAGAACAATAATTCATTTCGATTCGCCGATCCTC  
AAAAAAGAAATA---AGCAAGGTTTCGTCGTTGAGT-----GGCAATGG-----  
GAAATTCATGGAAAATTGCAATCCCCCGCGCAATAGTGCACCTATACGCCTTCATCGACGTTGTTTTTTGACCGGAAG  
GCCTAGAGGTAACATCGAGATTTTGGGCTATCCGGACACATACTTCGCGAAAGGTTTCATGCATGTTTGTACCTGGGG  
CAACAAGATCAAGTTGG-----ATGGTAAAA---  
AATTCATTCATCTCA-----GCTATTTTCG-----CAAGAAGAAAAAGAAAA---AAC-----AAAGGA---  
TCTACTGAATTTCAAATATTGAATTTCACTAAAAGGATACGTAGACTTACTTCACATTTGGAATTGCACAAAAAAGATTA  
TTTATCTCAGAGGGGGCTTCGGAAGATTTTAGGAAAACGTCAACGGCTACTGACCTATTTGTCAAATAAAAAATAGAGTAC  
GTTATAAAGAATTA-----ATTGGTCAACTGGATATTCGGAACCAAAAACTCGT-----  
ATGGTAAAACCTTCGTTTGAACGATGTGGTAGAAAGCAACGGGCCGTCTATCGAATCGTTGCAATTGATGTTTCGATCAGC  
AAGAGAGGGAAGGGATCTTCAGAAAGTGGGTTTCTATGATCCGATCAAGAATCAAACATATTTAAATGTTTCTGCTGTTT  
TATACTTCTCGGCAAG-----GGTGTCAACCTACAGGAAGTTCATGATATTTCAAAGAAGGCGGAGATATTT---  
AAAGAA-----CTTCGA-----GTT-----AATCAA---  
ACAATTCGAGTTAATCAAACAAAAGGGGGCTCCATATCTAAATGGATAAA-----  
ACCAAGCGACCCCTTCGTAAATCCAACGATCTTTTCGT-----  
-----  
AGGCGTTTG---CCCCACCAATT---  
GGATCGGGGGATCGAATTGATTATAGAAACATGAGTTTAATTAGTCGATTTATTAGTGAACAGGGAAAAATATTATCTAG  
AAGAGTGAACAGATTGACCTTGAAACAACAACGATTAATTACTATTGCCATAAAACAAGCTCGTATTTTATCTTTCGTTAC  
CTTTTCTT---AAT-----AATGAAAA-----  
-----  
-----CAGTTTGGAGACCTGAGTCAATCCCT-----AAAAGTGC-----GGACCGAGTATCAGA-  
-----AATAAA-----  
-----ATGGCGGTTCA-----TTAAAAAA-----  
-----  
AGCCCCTTTGTAGCTAATCATTATTGAAAAAATTGAGAAGCTCAATATGAAAGGGGGGAAGGAAATAATAGTAACGTG  
GTCCCGGGCATCTACCATTATCCCAACAATGATTGGCCATAACAATCGCTATTTCATAATGGGAAAGAACATTTACCCATTT  
ATATAACAGACCGTATGGTGGGTCACAAATTGGGAGAATTCGCACCTACTCTTACTTTC---CGG-----GGACAC---

-----  
GCGAGAAACGATAATCGATCTCGCCGT-----  
-----

ATGATTTTGAATCTTTTCTACTAGGTAATCTATTATCCTTATGCATGAAGATAATC-----  
AATTCGGTCGTTGTGGTC-----  
GGATTCTATTATGGATTTCTGACCACATTCTCCATAGGGCCCTCTTATCTCTTCTCCGAGCTCAAGTTATG-----  
----GAAGAAGAA-----ACCGAGAAGGAGATATCATCAACAACT---  
GGTTTTATTACGGGGCAGCTCATGATGTTTATATCGATCTATTATGCGCCTCT

Platanus

GAAATGCGTTTTGGATAACATCCTTTTTTCGATTGGGTATGGCTTCGACCATTCCCGGAGCCC GGCAATTAGTTAACCATAG  
ACATATTTTAGTTAATGGTCGTATAGTAGATATACCAAGTTATCGTTGCAAACCCCGAGATATTATTACGACAAGGGATG  
AACAAAAATCCAGAGCTCTGATTCAAATTATCTTGATTCATCCTCCCACGAG-----  
GAATTGCCAAAACATTTGACTCTT-----CACTCATTCCAA-----  
TATAAAGGATTAGTCAATCAAATAATAGATAGTAAATGGGTCGGTTTGCAA---  
ATAAATGAGTTGCTAGTCGTAGAATATTACTCCCGTCAGACT-----  
ATGTCACGTCGAGGTACTGCAGAAGAAAAAACTGCAAAATCCGATCCAATTTATCGTAATCGATTAGTTAACATGTTGGT  
TAACCGTATTCTGAAACACGGAAAAAAATCATTGGCTTATCAAATTATCTATCGAGCCGTGAAAAAGATTCAACAAAAGA  
CAGAAACAAATCCACTATCTGTTTTACGTCAAGCAATACGTGGAGTAACTCCCGATATAGCAGTA-----  
AAAGCAAGACGT---  
GTAGGCGGATCGACTCATCAAGTTCCCATTGAAATAGGATCTACACAAGGAAAAGCACTTGCCATTGCTTGGTTATTAGG  
GGCATCTCGAAAACGCCCGGGTCGAAATATGGCTTTCAAATTAAGTTCCGAATTAGTGGATGCTGCCAAAGGGAGTGGCG  
ATGCC---ATACGCAAAAAGGAAGAGACTCATAGAATGGCAGAGGCAAATAGAGCTTTTGCACATTTTCGT-----  
---

ATGGGTAGGGACACTATTGCCGACATAATAACTTCTATACGAAATGCTGACATGGATAAAAAGGGAAGGGTTCGAATAGG  
ATATACCAATATC-----  
GCCGAAAACATTATTAATACTTCTACGAGAAGGTTTTATCGAAAACGTGAGGAAACATCGAGAAAGCAACAAA-----  
-TATTTCTTGGTTTTCAACCCTGCGACAT-----AGAAGGAATAGGAAAAGA-----CCATATAAAACT-----ATT-  
-----

TAAAACGTATCAGCCGACCCGGTCTACGAATCTATTCCAATCAACGAATTCCTAGGATTTTAGGTGGAATAGGTAT  
TGTAATTTCTTCTACTTCTCGAGGTATAATGACAGATCGAGAAGCTCGACTAGAAGGAATCGGAGGAGAAATTTTGTGT  
ATATATGG---ATGGCAAAACCTATACAAAGAATTGGT---TCACGT-----  
AGGAATGGACCTATTGGTTCACGTAAGAATGGACGTAGA---  
ATACCAAAGGGAGTTATTCATGTTCAAGCAAGTTTCAACAACACCATTGTGACTGTTACAGATGTAAGGGGTGCGGGTGGT  
TTCTTGGTCTCCGCCGGTGTGTTGGATTTAGGGGCACAAGAAGAGGGACACCTTTTGTGCTCAAACCGCAGCAGGAA  
ATGCTATTTCGTACAGTAGTGGATCAG---  
GGTATGCAACGAGCAGAAGTCATGATAAAGGGTCTGGTCTCGGAAGAGATGCAGCATTACGAGCCATTTCGTAGAAGTGG  
TATACTATTAAGTTTCGTACGGGACGTAACCTCTATGCCACATAATGGATGTAGACCTCCTAAAAAAGACGTGTG---  
ATGCCAACTATTAACAACCTTATTAGAAACACAAGACAGCCAGTCAGAAATGTCACGAAATCCCCTGCTCTTCGGGGATG  
TCCTCAGCGCCGAGGAACATGTACTAGGGTGTAT-----  
ACTATCACCCCCAAAAAACCAAACCTCTGCCTTACGTAAAGTTGCCAGAGTACGATTAACCTCTGGATTTGAAATCACTGC  
TTATATACCTGGTATTGGCCATAATTTACAAGAACATTCTGTAGTCTTAGTAAGAGGAGGAAGGGTTAAGGATTTACCCG  
GTGTGAGATATCACATTGTTTCGAGGAACCCTAGATGCTGTGCGGAGTAAAGGATCGTCAACAAGGGCGTTCTAAATATGGG  
GTCAAAAAGCCAAAATA-----  
-----

ATGGCAAAGAAAAGTTTGATTTCAGAGGGGAGAAGAAGAGACAGAAAATTGGAACAGAAATATCATTGATTTCGTCGATCCTC  
AAAAAAGAAATA---AGCAAAATTCCTTCGTTGAGT-----GGCAAATGG-----  
GAAATTCATGGAAAACACTACAATCCCTACCACGTAATAGTGCAGCTACACGTCTTCATCGACGTTGTTTTTCGACCCGGAAG  
ACCAGAGCTAACTATCGAGACTTTGGGTTATCCGGACACATACTTCGTGAAATGGTTCATGCATGTTTGTGCGGGGGG  
CAACAAGATCCAGTTGG-----ATGGTAAAA---  
AATGCATTCATCTCG-----GTTATTTTCG-----CAAGAAGAAAAGAAGAA---AAC-----AAGGGG---  
TCTGCTGAATTTCAAGTATTCAATTTACCAATAAAAATACGGAGGCTTACTTCACATTTGGAATTGCACAGAAAAGACTA  
TTTATCTCAGAGAGGTCTACGGAAAATTTGGGAAAACGTCAACGGCTATTAGCTTATTTGTCAAAGAAAATAAAGTAC  
GTTATAAAGAATTA-----ATTAGTCAGTTGGATATTCGGGAGCCAAAATTCGT-----  
ATGGTAAAACCTTCGTTTGAACGATGTGGTAGAAAGCAACGAGCTATCTATCGAATTGTTGCAATTGATGTTTCGATCCCG  
AAGAGAAGGAAGAGATCTTCGGAAAGTGGGTTTTTACGATCCGATAAAGAATCAAACCTATTTAAATGTTCCCGTTATTCT  
TATATTTCTCGAAAAA-----GGTGCTCAACCTACAGGAAGTTCATGATATTTCAAAGAAGGCAGAAGTATTT---  
AAGGAA-----CTTCG-----ATT-----AATCAA---ACGAAATCAAATTA-----

-----ATGGATAAA-----CCCAAGCGACTCTTTCTGAAATCCAAGCGATCTTTTCGT-----  
-----AGGCGTTTG---CCCCA---ATT---  
GGATCGGGGGATCGAATTGATTATAGAAACATGAGTTTAATTAGTCGATTTATTAGTGAACAGGGAAAAATATTATCTAG  
ACGAGTGAATAGATTGACCTTGAAACAACAACGATTAATTACTATTGCTATAAAACAAGCTCGTATTTTATCTTCGTTAC  
CTTTTCTT---AAT-----AATGAGAAA-----  
-----CAATTTGAGAGAGCCGAGTCGACCCCT-----AGAACTCCT-----GGTCCTAGAACCAGA-  
-----AATAAA-----GTGACACGTTCA-----CTAAAAAAA-----  
AATCCTTTTGTAGCTAATCATTATTTAAGAAAAATTGAGAAGCTTAACACGAAGGCAGAAAAAGAGATAATAGTAACTTG  
GTCCCAGGCATCTACCATTATACCCACAATGATCGGCCATACAATTGCTATTTCATAATGGCAAGGAGCATTTCCTATTT  
ATATAACAGATCGTATGGTAGGTCACAAATTGGGAGAATTTGCGCCTACTATGAATTTCC---CGG-----GGACAT---  
GCGAAAAATGATAATAGATCTCGTCGT-----  
ATGATTTTGAATCTTTTCTACTAGGTAATCTATTATCCTTATGCATGAAGATAATC-----  
AATTCGGTCGTTGTGGTC-----  
GGACTCTATTATGGATTTCTGACCACATTCTCCATAGGGCCCTCTTATCTCTTCTTCTCCGAGCTCGGGTTATG-----  
----GAAGAAGGA-----ACCGAGAAGGAGGTATCAGCAACAAC---  
GGTTTTATTACGGGACAGCTCATGATGTTTCATATCGATCTATTATGCGCCTCT  
Populus  
GAAATGCGTTTTGGATAACATCCTTTTTTCGATTAGGTATGGCGTCAACTATTCTCGAGCCCAGCAATTAGTTAACCATAG  
ACATATTTTAGTTAATGGTCGTATAGTAGATATACCAAGTTATCGCTGCAAACCCCGAGATATTATTACAGCGAAGGATG  
AACAATACTAGAGTTATGATTCAAAATTTCTTTGATTCATTCCCCCAGGAG-----  
GAATTGCCAAAACATTTGACTCTT-----CACCCATTCCAA-----  
TATAAAGGATTGGTCAATCACATAATAGATAGTAAATGGATTGGCTTGAAA---  
ATAAATGAATTGTTAGTTGTAGAATATTATTCTCGTCAGACT-----  
ATGTCACGTCGAGGTACTGCAGAAGAAAAACTGCAAAATCCGATCCAATTTATCGTAATCGATTAGTTAACATGTTGGT  
TAACCGTATTCTGAAACACGGAAAAAATCATTGGCTTATCAAATTTCTTATCGAGCCATGAAAAAGATTCAACAAAAGA  
CAGAAACAAATCCACTATCTGTTTTACATCAAGCAATACGTGGAGTAACTCCCATATAGCAGTA-----  
AAAGCAAGACGT---  
GTAGGCGGATCGACTCATCAAGTTCCCATTGAAATAGGATCCACACAAGGAAAAGCACTTGCCATTGCTTGGTTATTAGG  
AGCATCCCGAAAACGTCCGGGTGCAAAATATGGTTTTCAAATTAAGTTCCGAATTGGTGGATGCTGCCAAAGGGAGTGGCG  
ATGCC---ATACGCAAAAAGGAAGAGACTCATAGAATGGCAGAGGCAATAGAGCTTTTGCACATTTTCGT-----  
---  
ATGGGTAGGGACACTCTTGCTGACATAATAACCTCTATACGAAATGCGGACATGGATAGAAAAGGAACCGTTTGAATACC  
ATCTACTAACATC-----  
ACCGAAAACATTATTAATAACTTTTTACGAGAAGGTTTTATTGAAAATGTGAGGAAACACCAGGAAGGCAATTTT-----  
-TTTTTTTTTGCTTTAACCTACGACAT-----AGAAGAAATAGGAAAGGA-----CCATGTGCAACG-----AGT-  
-----  
CTAAATTTAAAACGCATCAGTCGCCCTGGTCTACGAATCTATTCTAACTATCAACAAATTCGAGAATTTTAGGTGGAAT  
GGGGATTGTAATTTCTTTCTACTTCTCGGGGTATAATGACAGACCGAGAGGCTCGACTAGAAAAGAAATCGGTGGAGAAATTT  
TGTGTTATATATGG---ATGGCAAAACTTTTACCAAGAATTGGT---TCCCGC-----  
AAGAATGGACGTATTAGTTCACGTAAAAATGCACGTAAA---  
ATTCTAAGGGAGTTATTCATGTCCAAGCAAGTTTTCAACAATACTATTGTGACCGTTACAGATGTACGAGGTGCGGGTGT  
CTCTTGGTCTTCCGACGGCGCTTGTGGATTACGGGGCACAAGAAGAGGGACGCCATTTGCTGCTCAAATGCAGCAGGAA  
ATGCTATTTCGGACCGTAGTGGATCAA---  
GGTATGCAACGAGCAGAAGTCATGATAAAGGGTCTGGTCTAGGAAGAGATGCGGCATTAAGAGCTATTTCGTAGAAGTGG  
TATACTATTAAGTTTTCGTCCGGGATGTAACCCCTATGCCACATAATGGCTGCAGGCCTCCTAAAAAAGACGTGTG---  
ATGCCAACTATTAACAACCTTATTAGAAACACAAGACAGCCAATCAGAAATGTCACCAAATCCCCGCTCTCGGGGGATG  
CCCTCAGCGCCGAGGGACATGTACTAGGGTGTATAGTGGCAGTAAGGGTGACTTATCTGTCAACTTTTCCACTATCACCC  
CAAAAAACCAAATCTGCCTTACGTAAAGTTGCCAGAGTACGATTAACCTCTGGATTTGAAATCACTGCTTATATACCT

GGTATTGGCCATAATTCACAAGAACATTCTGTAGTCTTAGTAAGAGGGGGGAAGGGTTAAGGATTTACCCGGTGTGAGATA  
TCACATTGTTTCGAGGAACCTAGATGCTGTCGGAGTAAAGGATCGTCAACAAGGGCGTTCTCAATATGGGGTCAAAAAGC  
CA-----

-----  
ATGGCAAGGAAAAGTTTGATTGAGCGGGGAGAAGAAGAGGCCAAAAATTGGAACAAAAATATCATTGATTTCGTCGATCCTC  
AAAAAAGAAATA---AGCAAAGTTCGGTTCGTTGAGT-----GATAAATGG-----  
GAAATTCATGGAAAGTTACAATCCCCACCGCGAAATAGTGCACCAACACGTCTTCACCGACGTTGTTTTTGGACTGGAAG  
ACCAAGAGCTAATTATCGAGACTTTGGGCTATCCGGACACATACTTCGTGCAAAGGTTTCATGCATGTTTGTGGCCGGGG  
CAACAAGATCAAGTTGG-----ATGGTAAAA---  
AGTTCATTCAATTTCA-----ATTATTTCA-----CAAGAAGACAAAAAGAA---AAC-----AAGGGA---  
TCCGTTGAATTTCAAATAGTAAGTTTTACTAATAAGATACGAAGACTTACTTCACATTTGGAATTACATAGAAAAGACTA  
TTTATCTCAAAGAGGTTTACGGAAAATTCTAGGAAAACGCCAACGACTACTGTCTTATTTGGCAAAGAAAAATGGAGTAC  
GTTATAAAGAATTA-----ATTAGCCAGTTGAACATTCGGGAATCAAAAACCTCGT-----

-----  
-----ATGGATAAA-----TCCAAGCGACTTTTTCTTAAGCCCAAGCGATCTCTTCGT-----

-----AGGCGTCTG---CCCCG---ATT---  
GGATCGGGGGATCGAATTGATTATAGAAACATGAGTTTAATTAGTCGATTTATTAGTGAACAAGGAAAAATATTATCTAG  
ACGGGTGAATAGATTGACTTTAAACAACAACGATTAATTACCATTGCTATAAAACAAGCTCGTATTTTATCTTCATTAC  
CCTTTCTT---AAT-----AATGAAAGA-----

-----CAATTTGAAAAAACGAGTTGGTTCGT-----CGAACTACG-----GGTCTTAGAACCAGA-  
-----AAAAA-----  
-----ATGACACGTTCA-----CTAAAAAA-----

-----  
AATCCTTTTGTAGCAAATCATTATTAAGAAAAATAAATAAACTTAAACACAAAGGCAGAAAAAAATTTAATAGTAACGTG  
GTCCCAGGATCTACCATTATACCCACAATGATCGGCCATACTATTGCTATCCATAATGGGAAGGAGCATTACCTATTT  
ATATAACAGATCGTATGGTGGGTCAATAATTAGGAGAATTTGCACCTACTCTCAATTTCC---CGG-----GGACAT---

-----  
GCAAAAAATGATAATAAATCTCGTTCGT-----

-----  
ATGATTTTGAATCTTTTATACTAGGTAATCTAGTATCCTTATGCATGAAGATAATC-----  
AATTCGGTTCGTTGTGGTC-----  
GGACTCTATTATGGATTTCTGACCACATTCTCCATGGGACCTCTTATCTCTTCTTCTCCGAGCTCGGGTTATA-----  
-----GAAGAAGGAGAAGAAGGAACCGAGAAGAAGGTATCAGCAACAACA---  
GGTTTTATTACGGGCGAGCTCATGATGTTTCATATCGATCTATTATGCGCCTCT

Ranunculus

GAAATGCGTTTGGATAATATTCTTTTTCGATTAGGTATGGCTTCGACCATTCTGGAGCCCGACAATTAGTTAATCATAG  
GCATATTTTAGTTAATGGTCGTATAGTAGATATACCAAGTTATCGATGCAAACCCCGAGATATTACTACAAGGGATG  
AACAAAAATCCAGAGCTCTGATTCAAAATTTTATGGATTCATCCCCCACGAG-----  
GAATTGCCAAAACATTTGACTCTT-----CACCCATCCCAA-----  
TATAAAGGATCAGTCAATCAAATAATTGATAGTAAATGGGTTCGTTTGA---  
ATCAATGAGTTGCTCGTCGTAGAATATTATCCCGTCAAAC-----  
ATGTCACGTCGAGGACTGCAGAAGAAAAACTGCAAATCTGATCCAATTTATCGTAATCGATTAGTTAATCATGTTGGT  
TAACCGTATTTTGAACACGGAAAAAATCATTGGCTTATCAAATTATCTATCGAGCCCTGAAAAAGATTCAACAAAAGA  
CAGAAACAAATCCACTATCTGTTTTACGTCAAGCAATACGTGGAGTAACTCCCGATATAGCAGTA-----  
AAAGCAAGACGT---

GTAGGCGGATCGACTCATCAAGTTCCCATTGAAATAGGATCTACACAAGGAAAAGCACTTGCCATTTCGTTGGTTATTAGG  
GGCATCCCGAAAACGTCCGGGTGCAAATATGGCTTTCAAATTAAGTTCCGAATTAGTGGATGCTGCCAAAGGGAGTGGCG  
ATGCC---ATACGCAAAAAGGAAGAGACTCATAAAATGGCAGAGGCAAATAGAGCTTTTGGCATTTCGT-----  
---



ATGGGTAGGGACACTATTGCTGAAATAATAACTTCGATACGAAATGCTGACATGGATAAAAAAGGAACGGTTCGAATAGC  
ATCTACAAATATT-----  
ACCGAAAACATTGTTAAATACTTCTACGTGAAGGCTTTATTGAAAATGTGAGAAAACATCGAGTAAGCAAGAAA-----  
-TATTTCTTGGTTTCAACTCTGCGACAT-----AGAAGGAATAGAAAAGGA-----CCATATGGAATG-----GTT-  
-----  
TAAAAACGTATAAGCCGACCCGGCCTACGAATCTATTCCAATATCAAAGAATTCCTAGGATTTTAGGAGGAATGGGCAT  
TGTAATTCCTTCGACTTCTCGAGGTCTAATGACAGACCGAGAGGCTCGACTAGAAAAGAATCGGGGGAGAAATTTTGTGTT  
ATATATGG--ATGACAAAAACCATAACCAAGAATTGGC---TCACGT-----  
AGGAGTGGGCGCATTAGTTCACGCAAGAATGGACGTCGA---  
ATACCAAAAGGTGTTATCCATGTTCAAGCAAGTTTCAACAATACCATTGTAACGGTCACAGATATACGGGGTCTGGGTGGT  
TTCTTGGTCTCGGCGGGTACTTGTGGCTTCAGAGGCACAAGAAGAGGGACGCCATTTGCTGCCCAAACCGCAGCCGCAA  
ATGCTATCCGTACAGTAGTAGATCAG---  
GGTATGCAGCGAGCAGAGGTCATGATAAAGGGTCTGGTCTTGGAAGAGATGCAGCATTACGAGCCATTTCGTAGAAGTGG  
TATACTATTAAGTTTTGTCAGAGACGTAACCCCTATGCCGCATAATGGATGCAGGCCTCCTAAAAAAGGCGTGTA---  
ATGCCAACTATTAACAACCTTATTAGAAACACAAGACAGCCAATAAAAAATGTAACAAAATCCCCGCTCTTCGGGGATG  
TCCTCAGCGTCGAGGAACATGTACTAGGGTGTAT-----  
ACTATCACCCCCAAAAACCAACTCTGCCTTACGTAAAGTTGCCAGAGTACGATTAACCTCTGGATTTGAAATCACTGC  
TTATATACCTGGTATTGGCCATAATTTACAAGAACATTCTGTAGTCTTAGTAAGAGGAGGAAGGGTTAAGGATTTGCCCG  
GTGTGAGATATCACATTGTTTCGAGGAACCCTAGATGCTGTGCGAGTAAAAGATCGTCAACAAGGGCGTTCTCAATATGGG  
GTCAAAAAGCCAAA-----  
-----  
ATGGCAAGGAAAAGCTTGATTGAGAGGGAGAAAAAGAGGCAGAAATTAGAACAGAAATATCATTTGATTTCGTCGATCCTC  
AAAAAAGGAAATA---AAAAAAGTTCGGTCGTTGAGT-----GAAAAATGG-----  
GAAATTCATGGAAAATTACAATCCCCACCTCGTAATAGTGCACCTACACGTCTTCATCGACGTTGTTTTTCGACCGGAAG  
ACCGAGAGCTAACTATCGAGACTTTGGGTTATCCGGACACATACTTCGTGAAATGGTTCAGGCATGTTTGTACCAGGCG  
CAACAAGATCAAGTTGG-----ATGATAAAA---  
AATTTATTTGTTTCA-----TCTATTTTCG-----CAAGGAGAAAAAAAAGAA---AAC-----AGGGGG---  
TCCGTTGAATTTCAAGTATTACGCTTACCAATAAAAATACGTAGACTTACTTCCCATTTGGAATTACACAGAAAAGACTT  
TTTATCTCAGAGAGGTCTACGAAAAATTTCTGGGAAAACGTCAGCGGCTGCTGTCTTATTTGTCAAAGAAAAATAAAGTAC  
GTTATAAAGAATTA-----ATTAGTAATTTGAGTATTCGGGAGTCAAAAACCTCGT-----  
ATGGTAAAACCTTCGTTTTAAACGATGTGGTAGAAAGCAACGAGCCATCTATCGAATCGTTGCAATTGATGTTTCGATCCCG  
AAGAGAGGGAAGAGATCTTAAGAAAGTCGGTTTTTATGATCCGATAAAGAATCAAACCTATTCAAATGTTCCCGCCATT  
TAAATTTCTTGAAAA-----GGCGCTCAACCCACGGGAAGTTCATGATATTTTAAAGAAGGCAAAGATATTT---  
AAGTAA-----  
-----ATGGATAAA-----TCCAAGCGACTTTTTATTAATCCAAGCGGTCTTTTCGT-----  
-----  
-----AGGCGTTTG---CCCCA---ATT---  
GGGTCTGGGGGATCGAATTGATTATAGAAACATGAGTTTAATTAGTCGATTTATTAGTGAACAAGGAAAAATATTATCTAG  
ACGAGTGAATAGGTTGACTTTGAAACAACAACGATTAATTACTGTTGCTATAAACAAGCTCGTATTTTATCTTTGTTAC  
CTTTTCTT---AAT-----AATGAGAAA-----  
-----  
-----CAATTTGAGAGAACTGAGTCGACTCCT-----AGAACCACG-----GGTCCTCGAACTAGA-  
-----AATAAA-----  
-----GTGACACGTTCA-----CTAAAAAA-----  
-----  
AATCCTTTTGTAGCTAATCATTATTGATAAAAAATTACGAAGCTAAACATGAGGGCAGAAAAAGATACAATCGTAACTTG  
GTCCCGGGCATCTACCATTATACCCACAATGATTGGCCATAACAATTGCGATTATAATGGAAAAGAACATTTACCTATTT  
ATATAACCGATCGTATGGTAGGTCACAAATTGGGAGAATTTGCACCTACTTTGAATTTT---CGG-----GGACAT---  
-----  
GCGAGAAACGATAATAAATCTCGTCGT-----  
-----  
ATGAACATAAACAACCTATTCTATCACCTTAATATTACTAATAAAAAAGTAATCTAGTATCCTCATGCATGAAGATAATA--  
-----AATTCGGTCTTTGGTGC-----  
GGACTCTATTATGATTTTTTACCACATTCTCCATAGGGCCCTCTTATTTCTTCTTCTGCGAGCTCGAGTTCTG-----

----GAAGTTGGC-----

GACGAGAAGGAGATATCAGCAACAACAATAGGTTTTATTGCGGGACAGCTTATGATGTTTCATATCGATCTATTATGCGCC  
GCT

Spinacia

GAAATGCGTTTTGGATAATATCCTTTTTTCGATTGGGCATGGCTCCGACTATTCTGGAGCCCCGCAATTAGTTAACCATAG  
ACATATTTTAGTTAACCGCCGCATAGTAGATATACCAAGTTATCGTTGCAAACCCCAAGATACTATTATGGCGAGGGATG  
AACAAAAATCCATAGCTCTAATTCAAATTTCTTTGATTTATCCCCCGCGAG-----

GAATTACCCAAACATTTGACTCTT-----AACCATTCCCA-----

TATAAAGGATTAGTTAATCAAATAATAGATAGTAAGTGGGTCGGTTTTAAAA---

ATAAATGAATTACTAGTGGTAGAATATTATTCTCGTCAGACG-----

ATGTCACGTCGAGGTACTGTAGAAGAAAAAATGCAAAATCCGATCCAATTTATCGTAATCGATTAGTTAACATGTTGGT  
TAACCGTATTCTGAAACACGGAAAAAATCATTGGCTTATCAAATTTCTATCGAGCCGTGAAAAAGATTCAACAAAAGA  
CAGAAAACAAATCCACTATCTGTTTTACGTCAAGCAATACGTGGAGTAACTCCCGATATAGCAGTA-----

AAAGCAAGACGT---

GTAGGCGGATCGACTCATCAAGTTCCCATTGAAATAGGATCCACACAAGGAAAAGCGCTTGCCATTGCTTGGTTATTAGG  
GGCAGCCCGAAAACGTCCGGGTCGAAATATGGCTTTCAAATTAAGTTCCGAATTAGTGGATGCTGCCAAAGGGAGTGGCG  
ATGCC---GTACGCAAAAAGGAAGAGACTCATAGAATGGCAGAGGCAATAGAGCTTTTGCACATTTTCGT-----

---

ATGGGTAAGGACACTATTGCTGATATAATAACCTGTATACGAAATGCTGACATGAATAGAAAAGGAACGGTTTCAATAGT  
ATCTACTAACATC-----

ACCGAAAACATTGTTAAATACTTTTACGAGAAGGCTTTATCGAAAATGCGAGAAAACATCAAGAAAAGAAACAAA-----

-TATTTTTGGTTTTAACTCTGCGACAT-----AGAAGAAACAAGAAAGGG-----CCTTATCTAAAT-----ACT-  
-----

TTCCATTTAAAAAGAGTCAGTCGACCTGGTCTACGAATCTATTCTAATTATCAACGAATTCCTAGAATTTTAGGTGGAAT  
GGGGATTGCAATTTCTTTCTACCTCGAGAGGTATAATGACAGATCGGGAGGCTCGACTAGAAGGAATTGGCGGAGAAATTT  
TATGTTATATATGG---ATGGCAAAACCTATACCAAAAATTGGT---TCACGT-----

AGAAATGGACGTATTAGTTCGCGTAAAAGTGCACGTAAA---

ATACCAAAGGGTGTATTTCATGTTCAAGCAAGTTTTAATAATACCATTGTAAGTGTACAGATGTACGAGGTGCGAGTCGT  
TTCTTGGGCTTCTGCGGCTACTTGTGGATTGAGGGGTACAAAAGAGGAACACCATTGCGGCTCAAACCGCAGCGGGAA  
ATGCTATTTCGTACGGTGGTGAACAA---

GGTATGCAACGAGCAGAAGTCATGATAAAAAGGTCCTGGTCTCGGAAGGGATGCAGCATTACGGGCTATTTCGTAGAAGCGG  
TATACTATTAAGTTTTCGTGCGAGACGTAACCCCTATGCCGCATAATGGCTGTAGGCCTCCTAAAAAAGACGCGTC---

ATGCCAACCATTAACAACCTTATTAGAAACACAAGACAGCCAATCAGAAATGTCACGAAATCCCCCGCGCTTCGGGGATG  
CCCTCAGCGCCGAGGAACATGTACTAGGGTGTAT-----

ACTATCACCCCAAAAAACCAACTCTGCCTTACGTAAAGTTGCCAGAGTACGATTAACCTCTGGATTTGAAATCACTGC  
TTATATACCTGGTATTGGCCATAATTTACAAGAACATTCTGTAGTCTTAGTAAGAGGGGGAAGGGTTAAGGATTTACCCG  
GTGTGAGATATCACATTGTTTCGAGGAACCCTAGATGCTGTGCGAGTAAAGGATCGTCAACAAGGGCGTTCTAAATATGGG  
GTCAAAAAGCCAAA-----

-----

ATGGCAAGGAAAAGTTTTGATTTCAGCGGGGAGAAGAAGAGAAGAAATTTAGAACAAAAATATCATTGATTTCGATCCTC  
AAAACAAGAAATA---CGCAAAGTAACATCGTTGAGT-----GATAAATGG-----

GAAATTCATGGAAAGTTACAATCTCCACCACGTAATAGTGCACCTGCGCGTCTTCATCGACGTTGTTTTTTGACCGGAAG  
ACCGAGAGCTAACATACGAGACTTTGGGTTATCTGGACATATACTTCGTGAAATGGTTCACACATGTTTGTGCCAGGGG  
CAACAAGATCAAGTTGG-----ATGAAAAA---

AATTCATTATATCC-----GTAATTTG-----GATGAAAAAAGAAGAA---AAC-----AAGGGT---

TCTGTTGAATTTCAAGTATTCTGTTTTACCAATAAGATAAGAAGACTTACTTTACATTTGGAATTGCACAAAAAAGACTA  
TTCATCTCAGCGGGGCTACGAAAAACTCTGGGAAAACGTCAACGACTGCTGGCTTATTTGTTAAAGATAAATGGAGTAC  
GTTATAAAGAATTA-----ATCAGTAAATTGAACATTGAGAACTAAAAACACGT-----

ATGGTAAAACCTTCGTTTTGAAACGATGTGGTAGAAAGCAACGAGCCGTCTATCGAATCGTTGCAATTGATGTTCCGTCCCG  
AAGAGAGGGAAGAGATTTGCAGAAAGTGGGTTTTTATGATCCGATAAAAAGTCAAACCTATTTAAATGTTTCTGCTATTC  
TAGATTTTCTTGAAG---GGTGCTCAACCTACAGAACTGTCTATGATATTTTAAAGAGGGCAGAGGTTTTT---  
AAAGAA-----TTTCGA-----CTT-----AATCAA---ACGAAGTTCAATTA-----

-----ATGGATAA-----TCCAAGCGACCCTTTATTAATCCAAGCGCTCTTTTCGT-----

-----AGGCGTTG---CCCCG---ATC---

CAATCGGGGATCGAATTGATTATAGAAACATGAGTTTAATTAGTCGGTTTTATTAGTGAACAAGGAAAAATTTTATCTAG  
GCGAGTGAATAGATTGACCTTGAACAACAACGATTAATTACTAGTGCTATAAAAACAAGCTCGTATTTTATCTTTGTTAC

CTTTTCTT---AAT-----AATGAGAAA-----  
-----  
-----  
-----  
-----  
-----  
-----  
-----  
-----CAGTTTGAAAGAACCGAGTCGACTACT-----AGAACTGCT-----AATTTTGAAGCTAAA---  
-----AATAAA-----  
-----GTGACACGTTCA-----CTAAAAAAA-----  
-----  
AATCCTTTTGTAGCGAATCATTATTAAGAAAAATCGAGAAGCTTAACAAAAAGGCGGAAAAAGAAATAATAGTAACTTG  
GTCACGGGCATCTACCATTATACCCACAATGATTGGCCATACGATTGCTATCCATAATGGAAGAGAACACTTGCCCATTT  
ATATAACAGATCGTATGGTAGGTCTATAAATTAGGCGAATTTGCACCAACTCTCAATTTTC---CGG-----GGACAT---  
-----  
GCAAAAAACGATAATAAGTCTCGTCGT-----  
-----  
ATGATTTTTCAATCTTTTCTACTAGGTAATCTAGTATCCTTATGCATGAAGATAATC-----  
AATTCCGTCGTTGTGGTC-----  
GGACTCTATTATGGATTTCTGACCACATTCTCCATAGGGCCCTCTTATCTCTTCTTCTCCGAGCTCAGGTTATG-----  
----GAAGAAGGAGAAGAAGGAACCGAGAAGAAGGTATCAGGAACAACA---  
GGTTTTATTATGGGACAGCTCATGATGTTTATATCGATCTATTATACGCCTCT  
Triticum  
GAAATGCGTTTTGGATAATATCCTTTTTCGATTGGGTATGGCTTCAACCATTCTGGGGCCCGCCAATTAGTCAACCATAG  
ACATATTTTAGTTAATGGTCGTATAGTCAATATACCAAGTTTTCGTTGCAAACCCAGAGATATTACTACGAAAGATA  
ACCAAAGATCAAAAGGTCTGGTTCAAAATTATATTGCTTCATCGGACCCGGG-----  
AAATTGCCAAAGCATTGGCGATT-----GACACGTTGGAA-----  
TATAAAGGACTAGTAAATAAAATCCTAGATAGGAAGTGGGTCTGCTCAAA---  
ATAAATGAGTTGTTAGTTGTAGAATATTACTCTCGTCAGACT-----  
ATGTCACGTCGAGTACTGCAGAAAAAGAAGCTGCAAAATCCGATCCAAATTTTTCGTAATCGATTAGTTAACATGGTGGT  
TAACCGTATTATGAAAGACGGAAAAAAATCATTGGCTTATCAAATTTCTATCGAGCCGTGAAAAAGATTCAACAAAAGA  
CAGAAACAAATCCACTATTGGTTTTACGTCAAGCAATACGTAGAGTAACTCCCAATATAGGAGTA-----  
AAAACAAGACGTAATAAAAAAGGATCGACGCGGAAAAGTTCGATTGAAATAGGATCTAAACAAGGAAGAGCACTTGCCAT  
TCGTTGGTTATTAGAAGCATCCCAAAAGCGTCCGGGTGCAAATATGGCTTTCAAATTAAGTTCCGAATTAGTAGATGCTG  
CCAAAGGGGGTGGGGGTGCC---  
ATACGCAAAAAGGAAGCGACTCATAGAATGGCAGAGGCCAAATAGAGCTCTTGCACATTTTCGT-----  
ATGGGCAAGGACACTATTGCTGATTTACTAACCTCTATAAGAAATGCGGACATGAATAAAAAAGGAACAGTTCGAGTAGT  
ATCTACAAATATT-----  
ACCGAAAACATTGTGAAAATACTTCTACGAGAGGGTTTTATTGAAAGTGTTGCGAAACATCAGGAACGTAACAGA-----  
-TATTTCTTGGTTTTCAACTTTGCGACATCAAAAGAGAAAGACTAGAAAAGGA-----ATATATAGAACAAGAACCTTT-  
-----  
TTAAAGCGTATCAGCCGACCCGGCTTACGAATTTATACCAACTATCAAGGAATTCCTAAAGTTTTGGGTGGAATGGGAAT  
TGCTATTCTTTCTACTTCTCGAGGAATAATGACAGATCGAGAAGCTCGACTAAACAGAATTTGGGGGAGAAGTCTTATGTT  
ATATATGG---ATGGCAAAAGCTATACCAAAATTTGGT---  
TCACGTAAGAAAGTGCATGTTGGTTTACGTAGGAATGCACGTTTTAGTTTACGGAAGAGTGCACGTAGA---  
ATAACAAAAGGGGTATTTCATGTTCAAGCTAGTTTCAACAATACCATTATAACTGTTACAGACCCACAAGGTCCGGTGGT  
TTTTTGGTCTTCCGCCGGTACTTGTGGATTTCAAAGCTCAAGAAAAGCATCACCTATGCTGGTCAAAGAACAGCAGTAG  
ATGCTATTTCGTACAGTA-----  
GGTTTGCACACGAGCAGAAGTTATGGTAAAGGGCGCTGGTAGTGGAAGAGATGCCGCATTACGAGCCATTGCTAAAAGTGG  
TGTGCGATTAAGTTGTATACGCGATGTAACACCTATGCCGCATAATGGATGTGCGACCGCCTAAAAAAGACGTCTG---  
ATGCCGACGGTTAAACAACCTTATTAGAAACGCAAGACAGCCAATACGAAATGCTCGAAAAACGGCCGCGCTTAAAGGATG  
CCCTCAGCGTCGAGGAACATGTGCTAGGGTGTAT-----  
AACCCCAAAAAACCAACTCTGCCTTACGTAAAGTTGCCAGAGTACGATTAACCTCTGGATTTGAAATCACTGCTTATAT  
ACCTGGTATTGGCCATAATTTACAAGAACATTCTGTAGTATTAGTAAGAGGAGGAAGGGTTAAGGATTTACCCGGTGTGA  
GATATCGCATTATTTCGAGGAACCCTAGATGCTGTGCGCAGTAAAGAATCGTCAACAAGGGCGTTTACAATATGGGGTCAA  
AAGCCAAAAAAA-----  
-----  
ATGGCAAAAAAAGTTTTGATTTCAGAGGGAGAAGAAGCGGCAGAAATTAGAACAGAAATATCATTGATTTCGTCAATCTTT  
AAAAAAAAGATAAGAAGCAAAGTTTCTCCCTTGGATTTGAGTGAAAAAAT-----

AAAATGCGAGAAAAATTGCAATCCCTACCGCGTAATAGTGCACCTACACGCCTTCATCGACGTTGTTTTTTGACCGGAAG  
ACCTAGAGCTAACTATCGACATTTTTGGGCTATCCGGACACGTACTTCGAGAAATGGTTTTATGAATGTTTGTACCGGGTG  
CAACAAGATCCAGTTGG-----ATGAAAAAGAAAGGAGGTAGAAAAATTTTTGGATTTATGGTTAAA-----  
-----GAAGAAAAAGAAGAA---AAC-----AGGGGT---  
TCTGTTGAATTTCAAGTATTCAGTTTCACCAATAAGATACGGAGACTTGCTTCACATTTGGAATTACACAAAAAAGATTT  
TTCATCGGAAAGAGGTCTACGAAGACTTTTTGGGAAAACGTTCGACGTTTGGCTGGCTTATTTGGCAAAGAAAAATAGAGTAC  
GTTATAAGAAATTA-----ATCGGTTCAGTTGAATATTCGGGAGCAG-----  
ATGTTAAACTTCGTTTAAACGATGTGGTAGAAAGCAACAAGCTGTCTATCGAATCGTTGCAATTGATGTTCCGATCTCG  
AAGAGAAGGAAGAGATCTTCGAAAAGTAGGTTTTTATGATCCGATAAAGAATCAAACCTTGTTTAAATGTTCCAGCTATTC  
TCTATTTCTTGAAAA-----GGTGCTCAACCTACAAGAAGCTGTTTATGATATTTAAGGAAGGCGGAATTCCTT---  
AAAGAA-----AAAGAA---AGCACTTTGAGTTAA-----  
-----ATGTATACA-----  
TCTAAACAACCTTTTTCTTAAATCTAAGCAACCCTTTAGTAAATCCAAGCAAACCTTTTAAATAATCCAAGCAACCCTTTTCG  
TAAATCCAAGCAAACCTTTTCGTAAATTCAGCAACCTTTTCGTAAATCTAAACAACCTTTTCGT-----  
AGGCGT-----CCTCGG---ATT---  
GGCCCCGGGAGATCGAATTGATTATAGAAACATGAGTTTAATTAATAGATTTATTAGTGAACAAGGAAAAATATTATCGAG  
ACGAATAAATAGATTAACCTTGAAACAACAACGATTAATTAATCTTGTCTATAAAACAGGCTCGTATTTTTATCTTTCTTAC  
CGTTTTCGT---AACTATGAG-----AACGAAAAG-----  
-----  
-----  
-----  
-----  
-----CAATTTCAA---GCCAGTCAATTTCA-----ATAATTACA-----GGTTCTAGACCCAGA-----  
-----

AAAAATAGACATATTCCTCAATTAACGCAAAAGTACAATCCAATCGAAACTTAAGAAACAACAACCAAAATTTAAGAAA  
CAACAACCGGAACCTTAAGTTCCGATTGTGTGACACGA-----AAAAAACG-----

AATCCTTTTGTAGCTCATCATTTTATTGGCAAAGATAGAAAAGGTCAATATGAAGGAGGAGAAAGAAACAATAGTAACGTG  
GTCCCAGGATCTAGCATTCTACCCACAATGGTTGGCCATACAATCGCGATTATAATGGAAAGGAACATATACCTATTT  
ACATAACAAATCCTATGGTAGGTCGCAAATTGGGGGAATTCGTGCCTACTCGGCATTTT---ACGAGTTATGAAAAT---  
-----  
GCAAGAAAGGATACTAAATCTCGTCGT-----  
-----  
-----  
-----

Typha

GAAATGCGTTTTGGATAACATCCTTTTTTCGATTGGGTATGGCTGCGACCATTCTGGAGCCAGGCAATTAGTTAACCATAG  
ACATATTTTATGTTAATGGTCGTATAGTGGATATACCAAGTTATCGTTGCAAACCCGAGATATTATTACTACGAAGGATA  
ACCAAAAATCAAAGGTCTAATTCAAAATTCATTGCTTCAGCTGCCACGAG-----  
GAATTGCCAAAACATTTGACTATT-----GACTCATTCCAA-----  
TATAAAGGAGTAGTAAATCAAATAATAGATAGTAAATGGATCGGTTTTGAAA---  
ATAAACGAGTTGTTAGTCGTAGAATATTATTCTCGTCAGACT-----  
ATGTCACGTCGAGGTACTGCAGAAGAAAAAACTGCAAAATCCGATCCAATTTATCGTAATCGATTAGTTAACATGTTGGT  
TAACCGTATTATGAAACACGGAAAAAAATCATTGGCTTATCAAATTATCTATCGAGCCGTGAAAAAGATTCAACAAAAGA  
CAGAAACAAATCCACTATCTGTTTTACGTCAAGCAATACGTGGAGTAACTCCCATATAGCAGTA-----  
AAAGCAAGACGT---  
GTAGGCGGATCGACTCATCAAGTTTCTATTGAAATAGGATCTACACAAGGAAAAGCACTTGCCATTGTTGGTTATTAGG  
AGCATCCCGAAAGCGTCCGGGTCGAAATATGGCTTTCAAATTAAGTTCCGAATTAGTAGATGCTGCCAAAGGAAGTGGCG  
ATGCC---ATACGCAAAAAGGAAGAGACTCATAGAATGGCAGAGGCAAAATAGAGCTTTTGCACATTTTCGT-----  
-----  
ATGAGTAGAGACACTATTTCCGATCTAATAACTTCGATAAGAAATGCTGATATGGATAAAAAAAGAACGGTTTGAATAGC  
ATCTACAAATATC-----  
ACCGAAAACATTGTTAAATACTTCTACGAGAAGGTTTTATTGAAAACGTTTCGAAACATCAGGAAGGTAACAAA-----  
-TATTTCTTGGTTTCAACTCTGCGACAT-----AGAAAGAATGAAAAAAA-----ATATATAGAAGTACGATACCGT-  
-----

TTAAAGCGTATCAGCCGCCCGGATTACGAATTTATTCCAACATCAACGAATTCCTAAGATTTTAGGTGGAATGGGAAT  
TGTAATTTCTTTCTACTTCTCGAGGTATAATGACAGATCGAGAAGCTCGACTAGAAAAGAATTGGAGGAGAAATGTTGTTTT  
GTATATGG---ATGACAAAAGCTATACCAAGAATTGGT---TCACGT-----  
AGGAATGGGCGTATTAGTTCACGTAAGAATGGACGTAGA---  
ATACCAAAAGGAGTTATTCATGTTCAAGCAAGTTTTAACAATACTATTATAACTGTTACAGATGTACGAGGTCTGGGTGGT  
TTCTTGGGCTTCTGCTGGTACTTCTGGATTTAAAGGCACAAGAAGAGGAACACCCTATGCTGCTCAAGCCGCAGCGGTAA  
ATGCTATTCGTACAGTAGTCGATCAG---  
GGTATGCAACGAGCAGAAGTTATGATAAAGGGTCCCGGTCTGGGAAGAGATGCAGCATTACGAGCCATTTCGTAGAAGTGG  
TATACTATTAAGTTTTGTACGTGATGTAACACCTATGCCACATAATGGATGTGACCTCCTAAAAAAGACGTGTG---  
ATGCCAACTATTAACAACCTATTAGAAAACAAGACAGCCAATACGAAATGTTACGAAATCTCCCGCTCTTAGAGGGTG  
TCCTCAGCGTCGAGGAACATGTACTAGGGTGTAT-----  
ACTATCACCCCAAAAAACCAACTCTGCCTTACGTAAAGTTGCCAGAGTACGATTAACCTCTGGATTTGAAATCACTGC  
TTATATACCTGGTATTGGCCATAATTTACAAGAACATTCTGTAGTATTAGTAAGAGGAGGAAGGGTTAAGGATTTACCCG  
GTGTGAGATATCACATTGTTTCGAGGAACCCTAGATGCTGTCGGAGTAAAGGATCGTCAACAAGGGCGTTCA-----  
-----GTGCGTTG-----  
-----

ATGGCAAAAAAAGTTTTGATTTCAGAGGGGAGAACAACGGCAGAAATTGGAACAGAAATATCATTTGATTTCGTGATCCTC  
AAAAAATA---AGCAAAGTTTCATCGTTGAGT-----GAAAAATGG-----  
GAAATTCATGGAAAATTGCAATCCCCACCACGTAATAGTGCACCTATACGTCTTCATCGACGCTGTTTTTTGACTGGAAG  
ACCTAGAGCTAACTATCGAGACTTTGGGCTATCCAGACACGTACTTCGAGAAATGGTTCATGCATGTTTGTACCGGGTG  
CAACAAGATCAAGTTGG-----ATGGTCAA---  
AATTCATTCATTTCA-----ATTATTCCA-----CAAGAAGAAAAAGACGAA---AACAAGAACAAGGGT---  
TCCGTTGAATTTCAAGTATTCAGTTTTACCAATAAGATACGGAGACTTACTTCCCATTTGCAATTGCACAAAAAAGATTT  
TTTATCGCAAAGGGGTCTACGAAAATTCTGGGAAAACGACAACGGTTGCTAGCTTATTTGTCAAAGAAAAATAGAGTAC  
GTTATAAGAAATTA-----ATTGGTCAGTTGGATATTCGAGAGCCAAAAACTCGT-----  
-----  
-----

-----ATGGATAAA-----TCCAAGCAACCTTTTCGTAAATACAAGCGATCTTTTCGT-----  
-----AGGCGTTTG---CCCCA---ATT---  
GGATCGGGGGATCGAATCGATTATAGAAACATGAGTTTAATTAGTCGATTTATTAGTGAACAAGGAAAAATATTATCTAG  
ACGAGTGAACAGATTAACCTTGAAACAACAACGATTAATTAATGCTATAAAACAAGCTCGTATTTTATCTTTGTTAC  
CTTTTCTT---AAT-----AATGAGAAA-----  
-----  
-----

-----CAATTTGAGAGAGCCGAGTCGATCCCA-----AGAACTACT-----GGTCTAGAACCAGA-  
-----AATAAA-----GTGACACGTTCA-----CTAAAAAA-----  
-----

AATCCTTTTGTAGCTAATCATTTATCGGGAAAAATTGAAAACTCAACATGAGGGAGGAGAAAGAAATAATAGTAACTTG  
GTCTCGGGCATCTACCATTATACCCACAATGATTGGCCATAACAATCGCTATTCATAATGGAAAGGAACATTTACCTATTT  
ATATAACAGATCGTATGGTAGGTCACAAATTGGGAGAATTGCCCCCTACTCTGACTTTC---GCG-----AGACAT---  
-----  
-----  
-----GCAAGAAACGATAATAAATCTCGTCGT-----  
-----  
-----

Vitis  
GAAATGCGTTTTGGATAACATCCTTTTTTCGATTGGGTATGGCTTCGACTATTCTGGAGCCCGCCAATTAGTTAATCATAG  
ACATATTTTGTAGTTAATGGTCGTATAGTAGATATACCAAGTTATCGCTGCAAACCCGAGATATTATTACGGCGGGGAATG  
AACAAAAATCCAGAGCTCTGATTCAAAATGTTTTGATTTCATCCTCCCATGAG-----

GAATTGCCAAAACATTTGACTCTT-----CACCCATTCCAA-----  
TTTAAAGGATTAGTCAATCAAATAATAGATAGTAACTGGGTCGGTTTTGAAA---  
ATAAATGAATTGCTAGTCGTAGAATATTATTCCCGTCAGACT-----  
ATGTCACGTCGAGGTACTGCAGAAGAAAAAACTGCAAAATCCGATCCAATTTATCGTAATCGATTAGTTAACATGTTGGT  
TAACCGTATTCTGAAACACGGAAAAAAATCATTGGCTTATCAAATTATCTATCGATCCGTGAAAAAGATTCAACAAAAGA  
CAGAAACAAATCCACTATCTGTTTTACGTCAAGCAATACGTGGAGTAACTCCCGATATAGCAGTA-----  
AAAGCAAGACGT---  
GTAGGCGGATCGACTCATCAAGTTCCCATTGAAATAGGATCCACACAAGGAAAAGCACTTGCCATTGCTTGGTTATTAGG  
GGCATCCCGAAAACGTCCGGGTCGAAATATGGCTTTCAAATTAAGTTCCGAATTAGTGGATGCTGCCAAAGGGAGTGGCG  
ATGCC---ATACGCAAAAAGGAAGAGACTCATAGAATGGCAGAGGCAAATAGAGCTTTTGCACATTTTCGT-----  
---  
ATGGGCAGGGACACTATTGCTGACATAATAACCTCTATACGAAATGTCGACATGGATAGAAAAGTAACGGTTCGAATAGC  
ATCTACTAATATC-----  
ACCGAAAACATTGTTAAATACTTTTACGGGAAGGTTTTATCGAAAACGTGAGGAAACATCAGGAAAGCAACAAA-----  
-TATTTTTTGGTTTTAACCTGCGACAT-----AGAAGGAATAGGAAAGGA-----ACATATAGAACT-----ATT-  
-----  
TTAAATTTAAAACGGATCAGTCGACCTGGTCTACGAATCTATTCTAACTATCAACGAATTCCTAGAATTTTAGGTGGTAT  
GGGGATTGTAATTTCTTTCTACTTCTAGAGGTATAATGACAGACCGAGAGGCTCGCCTAGAAAAGAATTGGTGGAGAAATTT  
TGTGTTATATATGG---ATGGCAAACCTATACCAAGAATTGGT---TCACGT-----  
AGGAATGGACGTATTGGTTCACGTAAGAGTGCAGGTAGA---  
ATACCAAAGGGAGTTATTCATGTTCAAGCAAGTTTTAACAATACCATTGTGACCGTTACAGATGTACGGGGTCCGGTGGT  
TTCTTGGTCCCTCGGCCGGTACTTGTGGATTACAGGGGTACAAGAAGAGGGACGCCATTTGCTGCTCAAACCGCAGCAGGAA  
ATGCTATTTCGTACAGTAGTGGATCAA---  
GGTATGCAACGAGCAGAAGTCATGATAAAGGGTCTGGTCTCGGAAGAGATGCAGCATTACGAGCTATTCGTAGAAGTGG  
TATACTATTAAGTTTCGTACGGGATGTAACCTCTATGCCACATAACGGCTGTAGACCTCCTAAAAAAGACGTGTA---  
ATGCCAACTATTAACAACCTATTAGAAAACACAAGACAGCCAATCAGAAATGTCACGAAATCCCCCGCTCTTCGGGGGTG  
TCCTCAGCGCCGAGGAACATGTACTAGGGTGTAT-----  
ACTATCACCCCCAAAAAACCAACTCTGCCTTACGTAAGTTGCCAGAGTACGATTAACCTCTGGATTTGAAATCACTGC  
TTATATACCTGGTATTGGCCATAATTCACAAGAACATTCTGTAGTCTTAGTAAGAGGGGGAAGGGTTAAGGATTTACCCG  
GTGTGAGATATCACATTGTTTCGAGGAACCTAGACGCTGTGCGAGTAAAGGATCGTCAACAAGGGCGTTCTAAATATGGG  
GTCAAAAAGCCAAAA-----  
-----  
ATGGCAAGGAAAAGTTTTGATTAGAGGGGAGAGGAAGAGACAAAAATTGGAACAGAAATATCATTGATTTCGTATCCTC  
AAAAAAGAAATA---AGCAAAGTTCGGTTCGTTGAGT-----GACAAATGG-----  
GAAATTCATGGAAAGTTACAATCCTCACCGCGTAATAGCGCACCTACCCGTCTTCATCGACGTTGTTTTTTGACCGGAAG  
ACCGGGAGCTAACTATCGATACTTTGGGTTATCTGGACACATACTTCGTGAAATGGTTCATGCATGTTTGTGTCAGGGG  
CAACAAGATCAAGTTGG-----ATGGTAAAA---  
AACTTATTCATCTCA-----GTTATTTCT-----CAA-----AAAGAAGCA---AAT-----AGGGGA---  
TCTGTTGAATTTCAAGTATTCAGTTTACCAATAAGATCCGAAGACTTACTTCACATTTGGAATTGCACAGAAAAGACTA  
TTTATCTCAGAGAGGTCTACGGAAAATTCTGGGAAAACGTCAACGGTTGCTGTCTTATTTGGCAAAGAAAAATAGAGTAC  
GTTATAAAGAATTA-----ATTGGTCAGTTGGGTATTCGGGAGACAAAAATTCGT-----  
ATGGTAAAACCTTCGTTTGAACGATGTGGTAGAAAGCAACGAGCCGTCTATCGAATCGTTGCAATTGATGCTCGATCCCG  
AAGAGAAGGAAGAGATCTTCGGAAAGTGGGTTTTTATGATCCGATAAAGAATCAAACCTATTCAAATGTTTCTGCTATTC  
TATATTTCTTGA AAAA-----GGAGCTCAACCTACAGGAACGTTCATGATATTTCAAAGAAAGCGGAGGTTTTT---  
ACGGAA-----CTTCGT-----CTT-----AATCAA---ACGAAATTCAAATTCATCAATGA---  
-----ATGGATAAA-----TCCAAGCGACCTTTTCTTAAATCCAAGCGATCTTTTCGT-----  
-----  
-----AGGCGTTTG---CCCCG---ATC---  
CAATCGGGGGATCGAATTGATTATAGAAAACATGAGTTTAATTAGTCGATTTATTAGTGAACAAGGAAAAATATTATCTAG  
ACGAGTGAATAGATTGACTTTGAAACAACAACGATTAATTAATGCTATAAACAAGCTCGTATTTTATCTTCGTTAC  
CTTTTCTT---AAT-----AATGAGAAA-----  
-----  
-----CAATTTGAAAGAACCGAGTCGACCGCT-----AGAACTACT-----GGTCTTAGAACCAGA-  
-----AATAAA-----

-----GTGACACGTTCA-----CTAAAAAA-----

AATCCTTTTATAGCAAAGCATTATTAAGAAAAATTGCTATGCTTAACACAACGTGGGAAAAAGAAATAATAGTAACTTG  
GTCCCGGACATCTACCATTATACCCACAATGATCGGCCATACTATTGCTGTACATAATGGAAAGGAGCATTTCCTATTT  
ATATAACAGATCGTATGGTAGGCCACAAATTGGGAGAATTTTCATCTACTCTAAATTTTC---CGG-----GGACAC---

-----GCAAAAAACGATAATAGATCTCGTCGT-----

ATGATTTTAAAAATCTTTTCTACTAGGTAATCTAGTATCCTTATGCATGAAGATAATC-----

AATTCGGTCGTTGTGGTC-----

GGACTCTATTATGGATTTCTGACCACATTCTCCATAGGGCCCTCTTATCTCTTCTCCGAGCTCAGGTTATG-----

----GAAGAAGGAGAAGAAGGAACCGAGAAGAAGGTATCAGCAATAACT---

GGTTTTATTACGGGACAGCTCATGATGTTTCATATCGATCTATTATGCGCCTCT

Yucca

GAGATGCGTTTTGGATAATATCCTTTTTTCGATTGGGTATGGCTTCGACCATTCTGGAGCCAGGCAATTAGTTAACCATAG  
ACATATTTTAGTTAATGGTCGTATAGTGGATATACCAAGTTATCGCTGCAAACCTCGAGATATTACTACGAAGGATA  
AACAAAGATCGAAAGCTCTGATTCAAATTTATATTGCTTCTCCCTCACGAG-----

GAATTGCCAAACCATTGACTATT-----GACTCATTCCAA-----

TATAAAGGATTAGTAAATCAAATAATAGATAGTAAATGGATCGGTTTTAAA---

ATAAATGAGTTGTTAGTCGTAGAATATTATTCTCGTCAGACT-----

ATGTCACGTCGAGGTACTGCAGAAGAAAAACTGCAAATCCGATCCAATTTATCGTAATCGATTAGTTAACATGTTGGT  
TAACCGTATTCTGAAACACGGAAAAAATCATTGGCTTATCAAATTTCTATCGAGCCGTGAAAAAGATTCAACAAAAGA  
CAGAAACAAATCCACTATCTGTTTTACGTCAAGCAATACGTGGAGTAACTCCCATATAGCAGTA-----

AAAGCAAGACGT---

GTAGGCGGATCGACTCATCAAGTTCCTATTGAAATAGGATCTACACAAGGAAAAGCGCTTGCCATTGTTGGTTATTAGG  
GGCATCCCGAAAACGCCCCGGTTCGAAATATGGCTTTCAAATTAAGTTCGCAATTAGTAGATGCTGCCAAAGGGAGTGGCG  
ATGCC---ATACGCAAAAAGGAGGAGACTCATAGAATGGCAGAGGCAATAGAGCTTTTGCACATTTTCGT-----

ATGGGCAGAGACGCTATTGTTGATATAATAAATTCTATAAGAAATGCTGACATGAGTAAAAATGGAACGGTTCGAATAGC  
ATCCACTAATATC-----

ACCGAAAACATTGTTAAAATACTCCTACGAGAAGGTTTTATTGAAAACGTTTCGAAAACATCAGGAAAAGTAACAAA-----

-TATTTCTTGGTTTTCAACCTTGCGCCAT-----AGAAGGACTAGGAAAAGGA-----ATATATAGAACT-----ATT-

TTAAAACGTATCAGTCGACCTGGTCTACGAATCTATTCCAATATCAAAAAATTCCTAAGATTTTAGGTGGAATGGGAAT  
TGTAATTTCTTTCTACTTCTCGAGGCATAATGACAGATCGAGAAGCTAGACTAGAAAAAATTGGAGGAGAAATTTTGTGTT  
ATATATGG-----AAACCTATACCAAGAGTTGGT---TCGCGT-----

AGGAATGGACGTATTGGTTCACGTAAGAATGGACGTAGA---

ATACCAAAGGTGTTATTTCATGTTCAAGCGAGTTTCAACAATACCATTGTAAGTGTACAGATGTACGAGGTTCGGTGGT  
TTCTTGGGCCTCCGCCGTTACTTCTGGATTCAAAGGCACACGAAGACAGACACCTTATGCTGCTCAAGCCGCCGCCGCA  
ATGCTATTTCGTAAGTTGATCAG---

GGTATGCAACGAGCAGAAGTTATGATAAAAGGTCCAGGTCTCGGAAGAGACGCAGCATTACGGGCCATTTCGTAGAAGTGG  
TATACTATTAAGTTTCGTACGTGATGTAACACCTATGCCACATAATGGATGTGACCTCCTAAAAAAGACGTGTG---

ATGCCGACAATTAACAACCTTATTAGAAACACAAGACAGCCAATAAGAAATATCACGAAATCTCCCGCGCTTCGAGGATG  
TCCTCAGCGTAGGGGAACATGTACTAGGGTGTAT-----

ACTATCACCCCAAAAAACCAACTCTGCCTTACGTAAAGTTGCCAGAGTACGATTAACCTCTGGATTTGAAATCACTGC  
TTATATACCTGGTATTGGCCACAATTCACAAGAATCTGTAGTATTAGTAAGAGGAGGAAGGTTAAGGATTTACCCG  
GTGTGAGATATCACATTGTTTCGAGGAACCTAGATGCTGTGCGAGTAAAGGATCGTCAACAAGGGCGTTCT-----

ATGGCAAGAAAATGTTTGATTTCAGAGGGAGAAGAAGCGGCAGAAATGGAACAGAAATATCATTGATTTCGTGATCCTC  
AAAAAAGAAATA---AGCAGGGTTTCGTGTTGAGT-----GAAAAATGG-----

GAAATTCATGGAAAATTGCAATCCCCACCAGTAATAGTGCACCTATACGTCTTCATCGACGTTGTTTTTTGACTGGAAG  
ACCTAGAGCTAACTATCGAGACTTTGGACTATCCGGACACGTACTTCGAGAAATAGTTCATGCATGCTTGTACCAGGCG  
CAACAAGATCCAGTTGG-----ATGGTCAA---

AATTCATTATCTCG-----GCTATTCGA-----CAAGAA---AAAGAAAA---AAC-----TGCGGA---

TCTGTTGAATTTCAAGTATTCAGTTTACCAGATAAGATACGGAGACTTACTTTACATTTGGAATTACATAAAAGAGATTT  
TTTATCGCAAAGGGTCTACGAAAAATTTGGGAAAACGTCAACGCTGCTGGATTATTTGTCAAAGAAAAATAGAGTAC

GTTATAAGAAATTA-----ATTAGTCAGTTGGGTATTTCGGGAATCAAAAACCCGT-----  
-----  
-----  
-----  
-----  
-----  
-----ATGGATAAA-----TCCAAGCAACCTTTTCGTAAATCCAAGCGATCTTTTCGT-----  
-----  
-----AGGCGTTTT--CCCCA--ATT--  
GAATCGGGGGATCGAATTGATTATAGAAAACATGAGTTTAATTAGTCGATTTATTAGTGAACAGGGAAAAATATTATCTAG  
ACGGGTGAATAGATTGACCTTGAAACAACAACGATTAATTACTATTGCTATAAAACAAGCTCGTATTTTATCTTTGTTAC  
CTTTTCTT--AAT-----AATGAAAA-----  
-----  
-----  
-----  
-----  
-----CAGTTTGAGAGAGCAGAGTCGATTCT-----AGAACTACT-----GGTCCTAGAACCAGA-----  
-----AATAAA-----GTGACACGTTCA-----CTAAAAAAA-----  
-----  
AATCCTTTTGTAGCTAATCATTATCCAGAAAAATGGAaaaaactcaacatgagggaggagaaagaaataatagtaacttg  
GTCTCGGGCATCTACCATTATACCCAAAATGATTGGCCATAACAATCGCTATTATAATGAAAGGAACATTTACCTATTT  
ATATAACAGACCGTATGGTAGGTCACAAATTGGGAGAATTTCGCGCCTACTCTGACTTTC---GCG-----AGACAT---  
-----  
GCGAAAAACGATAATAAATCTCGTCGT-----  
-----  
-----  
-----  
-----

Zea

GAAATGCGTTTTGGATAATATCCTTTTTTCGATTGGGTATGGCTTCAACCATTCTGGGGCCCCGACAATTAGTTAACCATAG  
ACATATTTTAGTTAATGGTCGTATAGTTGATATACCAAGCTTTTCGTTGCAAACCCCGAGATATTATTACTACGAAGGATA  
ACCAACGATCAAAACGTTTGGTTCAAATTATATTGCTTTCATCCGATCCGGGC-----  
AAATTACCAAAGCATTGACGGTT-----GACACATTGCAA-----  
TATAAAGGACTAGTAAAAAAATTCTAGATAGGAAGTGGGTGCGTCTCAA---  
ATAAATGAGTTGTTAGTTGTAGAATATTATTCTCGCCAGACT-----  
ATGTCACGTCGAGGTACTGCAGAAAAAGAACCgaaatccgatccaatttttcgtaatcgattagttaacatgggtgg  
TAACCGTATTATGAAAGACGGAAAAAATCATTGGCTTATCAAATTCCTATCGAGCCGTGAAAAAGATTCAACAAAAGA  
CAGAAACAAATCCACTATTGGTTTTACGTCAAGCAATACGTAGAGTAACTCCCAATATAGGAGTA-----  
AAAACAAGACGTAATAAAAAAGGATCGACGCGGAAAGTTCGGATTGAAATAGGATCTAAACAAGGAAGAGCACTTGCCAT  
TCGTTGGTTATTAGAAGCATCCCAAAAGCGTCCGGGTCGAAATATGGCTTTCAAATTAAGTTCGAATTAGTAGATGCTG  
CCAAAGGGAGTGGGGGTGCC---  
ATACGCAAAAAGGAAGCGACTCATAGAATGGCAGAGGCAAATAGAGCTCTTGCACATTTTCGT-----  
ATGGGCAAGGACACTATTGCTGATTTACTAACCTCTATAAGAAACGCAGACATGAATAAAAAAGGAACGTTCGAGTAGT  
ATCCACAAATATT-----  
ACCGAAAAACATTGTAAAATACTTCTACGAGAGGGTTTTATTGAAAGTGTTTCGAAACATCAGGAAAGTAACAGA-----  
-TATTTCTTGGTTTCACTTTGCGACATCAAAGGAGAAAGACTAGAAAGGGA-----ATATATAGAACTAGAACCTTT-  
-----  
TTAAAGCGTATCAGCCGACCTGGCTTACGAATTTATGCCAACTATCAAGGAATTCCTAAGGTTTTGGGCGGAATGGGAAT  
TGCTATTCTTTCTACTTCTCGAGGTATAATGACAGATCGAGAAGCTCGACTAAACAGAATTGGGGGAGAAGTTTTATGTT  
ATATATGG---ATGACAAAAGCTATAACAAAATAGGT---  
TCACGTAAGAAAGTGCGTATTGGTTTGCGTAGGAATGCCCGTTTTAGTTTACGGAAGAGTGCACGTAGA---  
ATAACAAAAGGGATTATTGATTGTTCAAGCTAGTTTTCAACAATACCATTATAACCGTTACAGACCCACAAGGTCCGGTCTG  
TTTCTGGTCTTCCGCAGGTACTTGTGGATTCAAAGCTCAAGAAAAGCATCACCTATGCTGGTCAAAGAACAGCAGTAG  
ATGCTATTCGTACAGTG-----  
GGTTTGCACAGCAGAGAAGTTATGGTAAAAGGTGCTGGTAGCGGAAGAGATGCCGATTACGAGCCATTGCTAAAAGTGG  
TGTACGGTTAAGTTGTATACGCGATGTAACACCTATGCCGATAATGGATGTGACCTCCTAAAAAAGACGTCTG---



ATGCCAACGGTTAAACAACCTTATTAGAAATGCAAGACAGCCAATACGAAATGCTAGAAAATCGGCCGCGCTTAAGGGATG  
TCCTCAGCGTCGAGGAACATGTGCTAGGGTGTAT-----  
ACTATCAACCCCAAAAAACCAACTCTGCCTTACGTAAAGTTGCCAGAGTACGATTAACCTCTGGATTTGAAATCACTGC  
TTATATACCTGGTATTGGCCATAATTTACAAGAACATTCTGTAGTATTAGTAAGAGGAGGAAGGGTTAAGGATTTACCCG  
GTGTGAGATATCGCATTATTCGAGGAACCCTAGATGCTGTGCGCAGTAAAGAATCGTCAACAAGGGCGTTCTAAATATGGG  
GCCAAAAAGCCAAAAAA-----

ATGGCAAAAAAAGTTTGATTGAGAGGGAGAAGAAGCGGCAGAAATTAGAACAAAAATATCATTGATTGATTCGTCGATCCTC  
AAAAAAAAGATAAGAAGCAAAGTTTCCCCTTTGAGTTTGAGCGAAAAACA-----  
AAAATGCAAGAAAAATTGCAATCCCTACCACGTAATAGTGCACCTACACGCCTTCATCGACGTTGTTTTTAACCGGAAG  
ACCTAGAGCTAACTATCGAGACTTTGGGCTATCCGGACACATACTTCGAGAAATGGTTTTATGCATGTTTGTACCGGGTG  
CAACAAGATCCAGTTGG-----ATGGTTAAA-----

-----GAAGAAAAACAAGAA---AAC-----AGGGGT---  
TCTGTTGAATTTCAAGTATTCAGTTTACCAATAAGATACGGAGACTTGCTTACATTTAGAATTACACAAAAAAGATTT  
TTCATCGAAAGAGGTCTACGAAGACTTTTGGGAAAACGTCAACGTTTGGCTGGCTTATTTGGCAAAGAAAAATAGAGTAC  
GTTATAAGAAATTA-----ATAAGTCAGTTGGATATTCGGGAGAAG-----  
ATGGTAAACTTCGTTTTAAACGATGTGGTAGAAAGCAACAAGCTATCTATCGAATCGTTGCAATTGATGTTTCGATCTCG  
AAGAGAAGGAAGAGATCTTCGAAAAGTAGGTTTTTATGATCCGATAAAGAATCAAACCTGTTTTAAATGTTCCAGCTATTC  
TCTATTTCTTTGAAAAG-----GGTGCTCAACCTACAAGAACAGTTTATGATATTTAAGGAAGGCAGAATTCCTT---  
AAAGAT-----AAAGAA---AGAACTTTGAGTTA-----

-----ATGTATATA-----  
TCTAAACAACCTTTTCGTAATCTAAGCAACCTTTTCGTAATCCAAACAACTTTTCATAAATCTAAGCAACCTTTTCG  
TAAATTCAAACAACCTTTTCGTAATCTAAGCAACCTTTTCGTAATCCAAACAACCTTTTCGT-----  
AGGCGT-----TCTCGA---ATA---  
GGCCCGGGGGATCGAATTGATTATAGAAACATGAGTTAATTAATCGATTTATTAGTGAACAAGGAAAAATATTATCTAG  
ACGAATAAATAGATTAACCTTGAAACAACAACGATTAATTACTCTTGCTATAAAACAGGCTCGTATTTTATCTTTCTTAC  
CATTTCGT---AACTATGAG-----AATGAGAAG-----

-----CAATTTCAA---GCCCAGGCAATTTCA-----ATAATTACT-----GGTCTAGACACAGA-----

AAAAATAGACATATTCCTCAATTAACACAAAAGTTCAATTCCAATCGAAACTTAAGAAACTCCAACCAGAATTTAAGAAA  
CAACAATCGAAACTTAAGTTCCGATTGTGTGACACGA-----AAAAAACG-----

AATCCTTTTGTAGCTCGTCATTTATTGGCAAAAAATCGAAAAGGTCAATATGAAGGAGGAGAAAGAAATAATAGTAACGTG  
GTCCCAGGCATCTAGCATTCTACCCGCAATGGTTGGCCATAACAATCGCGATTATAATGGAAAAGAACATATACCTATTT  
ACATAACAAATCCTATGGTAGGTCGAAATTGGGGGAATTCGTGCCTACTCGGCATTTTC---ACGAGTTATGAAAGT---  
-----  
ACAAGAAAGGATACTAAATCTCGTCGT-----

Acorus GCATCTAGCATTGGGTAGACCTCATAACAATAACTGTCCTAGTTATACCGTATCTTTTGTTCAT--  
----TTCTTCTCGAACAATCAAAAACAATTTTTTGGAT-----TATGGATCTACTACC-----

AGAAATTCAATGCGTAATCTCAGCATTCAATGTGTATTCCTAACTAATCTAATTTTTCAACTCTTCAACCATTTAATGTT  
ACCAAGTTCAACGTTAGCGAGATTAGTCAACATTTATATGTTTCGATGCAACAACAAGATGTTATTTGTAACAAGTAGTT  
TTGTTGGTTGGTTAATTGGTACATTTTATTCATGAAATGGGTTGGATTGGTAGTATCCTGGATACGGCAA---  
AATCAT-----TCT-----ATTCGATCTAATGTACTTATTCGATCTAAT-----  
----AAGTAC-----CTTGGGTTAAAATTGAAAAGTGCTATA-----  
GCTCAAATCTTGAGTATTATCTTCTTTATCGCCTGTGTCAACTATTTAGCC-----AGACTACCGGATCCTAGT-----  
-

GTCACTAAGAACTGAACGAAACCTCAAAAACGGAAACGGAAGAAGAAGAAAGTAAAGAAAGTCAAAAAAGTAAAGAAAG  
TGAGGAAGAAAGAGACGTAGAAAAAGAAACAACCTCCGAAACGAAGGAGACTAAACAGGAACAAGAGGGATCCACCGAGC  
AAGACCCT-----TCCCCT-----TAT---TGGGAAGAAAAGGAGGATCCGGACAAA---  
ATAGATGAAACGGAAGAGATCCGAGTGAATGGAAAGGAAAAAAAAAAGGATGAAACGGAAGAGATCCGAGTGAATGGAAA  
GGAAAAAAAAAAGGATGAATTCGGCTTTCACCTTTAAAGAGACAGACTATAAACGTAGCCCAGGTTACGAA-----  
AACTCTTATCTTGATGGGTATCAAGATAATTGGGACTTGCAAAGTGAAGAAGAA--GAAGAAGAAG-----  
-----  
AAAGTACTTTAGGGTTTGAAAAACCTCTTGTAACCTGTCTTTTCGACTATAAACGATGGAATCGACCTTTTAGATATATA  
AAAAACAAA-----ACATTCGAG---AATGCTATAAGA-----  
GACGAAATGTCACAATATTTTTTATACATGTCTGAATAATGGGAAAAAAAAAATATCTTTTACATATCCACCTAGTTT  
AGCGACTTTTTTCGGAATAATAGAAAAGAAAG---ATGTCTTTG---TACACAACAAAAAACTAACTGATGACGAC---  
TTGTATAGTCATTGGGTTTCCAACAATGAAGAGAAAAAGAAC-----  
AACTTAAGTAATGAGTTGATAAACCGAATAAAAAGTTTTAGACAAGGGATCCCTTGCTCCGGATGTGCTCGAAAAAAGGAC  
GAGATTGTGTGATGATGAGAATGAACAAGAA-----  
TGCTTACCTAAAAAGTATGATCCTTTGTTGAATGGATCATATCGCGGAAGAATAAAGAAATTAGAATCAGAATCAACTAG  
GAACGAT-----  
TCAATCATTTCGCAAAAAGGTTCACTAGAAAAAATTTGGAAAAATAAGATACACAGTCTTATTACTAATGAT-----  
-----TCTCGAGAATTTGAACATCAAATGGATCCGTTTGACGGAGAATCTTTATCGGCATATATG---  
ACTCATTCTTAACCTCAATCAGTAAATTTGTCTTTGGAATTAGTATCTATTTTCCATTTTGAG-----  
GATCTTGCTTTATTGACAGAACAAAAAGAATTGATTTTAAAAATCAAACGAAACGGTTGAAA-----  
-----TTTCTATTTCGATGTAATTACAGCTGACGCAAATAATCAA-----ACCATTGAAAAT----  
--  
AAATTTATTGAAATAGAAAAGATCGACAAAAAGATTCCTAGATGGGTATACAAATTGATATCCGAGGAGGATTATTTGGC  
ACAACAAGAACAACAGGAAGAAGAAAATGAGGAAGAAGCACCCTGGATTTTGGAAATTCGTTCCGAGAAAAGGCAGACGTG  
TAGTAATTTATACTGATAAAAATCAGAATCGGGATCAGGATCCCAATCCTAATACCGATAATACTACTACCGAGAACGAT  
AATAGT-----  
-----  
-----GATACGGGGGAAGAA-----  
ATAGCTTTGATACGTTACGCGCAACAATCAGATTTTAGTCGGGATCTGATCAATGGATCCATACGCGCTAAAAGACGTAA  
AATAGTTCTTTGGGAAATGTTACAAGCAAATGCGCATTCCCCACTTTTTTTAGATCAA---GTAGCA---  
AAAATGGTTTCTTTTGATCTCTTTGATGATCTTCGTGAAACAATGAAT-----CTTATTTTGTAGGAATTGGATAACA--  
-AAGGAGCCAGAATTACAAATTTGGATTCTGAAGAGAAAGAGGACAGAGAAAAA-----  
-----CTGATAAAGATAAGGGAG-----  
GAAGATGAACGGATAATAATATCCGAAACTTGGGATAACGTTATGTGTGCCCAAGCAATAAGAGGCTGTATGCTAGTAAC  
CCACTCATTATTAGAAAATACATTATATTGCCTTTATTAATAATAGCTAAAAACATTGGGCGTATATTATTATTTTCAGC  
TCTCTGAGTGGGATGAGGATTTTAAGGACTGGAATAGAGAAATGCATGTTAAATGCACCTATAATGGTGTTC AATTATCA  
GAAACAGAATTT---  
CCTCAAAACTGGTTAAAGGATGGTATTTCAGATAAAGATCCTATTTCTTTTTCTCTAAAACCTTGGCGCGAATCTAAGGC  
AACACCCTCTACT-----GGAGGTCTAATGAAAGAGAAAAAAGAAA---  
AATGACGATTTTTGT---TTTTTAACAGTTTGGGGAATGGAAGCGGAACTCCCTTTT---  
GGTCCCCCTCGAAACCGACCTTCTTTTTTTAAACCCATTTTTGAAGAACTTGACACAAACATTCGAAAG---  
GTGGAAAACCAAAGTTTT-----GTTTTCAAAGAAAAAACAAA-----  
GACTTTTTAAAGAAAAAACGGGATGGGTTACAAAAATCGTTTTTA-----TTGAAAAATAAATAAGGAAC--  
-TTTTTTACAAAAGTAAAC-----CCCAATTTATTATTTCGGATTGAAGAAA-----  
GTATATGAACCAAGTGAGAATCAAAAA---GAT-----TCC-----ATAATTAGT---AATAAG-----  
-ATTACCCACGAATCGACTGTTCAA-----ATTCCATCCAGCAATTGGACAAATTAT-----  
TCACCGATAGAAAAAAAATGAAG---GATCTGTCTGATAGGACAATCACAACCAGGAGTCAAATAGAACGCATC-----  
-ACAAAAGACAAGCAAAAAGGATTTCTAACTTCAGAT-----  
ATAAATATTTCGTTCTAATGAGACAAGTTGTAATGCTAAAAAGAACGGAATTGCAGAAAGATATTTTACGGATAGCA---  
AAAAAAGAAGTATCCGATTCATCCGTAATACACTCTTTTGTGAAATCTTTC-----  
ATTGAAAGAATATACCTAGATATCTTTCTATGTACCATTAAC-----  
ATTCCCCGAATTAATCTACAACCTTTTCTTTGAATCA---ATAAAA-----  
AAGATTCTCAATAAATCCATTTCTAAT-----  
GATGAAAGAAATAAAGAAAAAATTGATGAAACAAATCAAAAATACAATTCACCTTTATTTCTACTATAAGAAAT-----  
----TCGTTTTCTAAT---AGTAATCTTAATAATAAATCAAAG---ATTTATTGG---  
GATTTCTCTTTATTGTCCCAAGCATATGTATTATATAAATTATCACAACCCAAGTGATTAAAAGG-----  
TATCAATTGAAATCTGTACTTCAATATCACAGA-----GCATATCCTTTTCTGAAGGATAGAATCAAGGACCTTTTT--

-----GGGACACCAAGAATAGTTCATGCCAAATCAAGGCCT-----AAGAACTTCCT-----  
ATTTTCGAGAATAAAT-----GCATGGAAAAACTGGTTAAGG-----GGTCAT---TAT---CAATAC---  
AATTTATCTCAGACTAGATGGTCTGAATTAGTACCGAAAAAATGGCGAGAGAAATTCAATCAA---  
CGTACGATTAATAAATAAATACTCAAGAAAA-----  
TTGAATTCATCTGAAAAAGAAAAAACCAACAAGCTCATTACGCGAAAGAAATT-----  
TCTTATGTAGTGGATTTCATTGTCGAGT---CAAAAAGGAAAATTG-----  
AAAAAGACTACAGATATGATCTTCTATCACATAAATATATTAATTCCAATTATGAGGATAGGGAGTACTCAGATATT--  
---TCGAGATTATCATTACAAATAAATGGG---  
Amborella GCATCTAGCATTGGGTAGACCTCATAACAATAACTGTCCTAGTTCTACCCTATCTTTTGTTCAT--  
---TTCTTCTGGAACAATCACAAACACTTTTTTTCT-----TATAGATCTACTACC-----  
-----  
AGAAATTC AATGCGTAATCTCAGCATTCAATGTGTATTCTGAATAATCTCATTTCATTTTCAATTATTCAACCATTTTCATTTT  
ACCAAGTTCAACGTTAGCCAGATTAGTCAACATTTATATGTTTCGATGCAACAACAAGATGTTATTTGTAACAAGTAGTT  
TTGTTGGTTGGTTAATCGGTCACATTTTATTCATGAAATGGGTTGGATTGGTATTATTCTGGATACGGCAA---  
AATCAT-----TCT-----ATTAGATCGAATGTACTTATT-----  
---AAGTAC-----CTTGTGTCAGAATTGAGAAAGTCTATG-----  
GCTCGAATCTTGAGTATTCTCTTGTGTTTATCACCTGTGTCTACTATTTAGGC-----AGAATACCATCGCCTATT-----  
-TTCACTAAGAACTGAAAGAAACCTCA-----GAAACAGGGGAAACTGAGGAA-----  
-----  
GAAACAGATGTAGAAATAGAAAGA AACTTCCGAAACGAAGGGGACTGAACAGGAAAAAGAGGGATCAACCCGAAGAAGACCC  
T-----TCCCTTTTTTGTTCGGAAGAAAAGGGGGATCCGGACAAA---ATAGATGAAAGAGAAG-----  
GAGTGAATGGAAGAAAAAACAAGGATCACTTCAACCTC-----  
AAAGAAAGATGGTATAACAATAAGACTGTATAC-----  
CGGGATCAGGAAGATAATACTGCATATGGAGAT-----GGGAATCAGGAAGATTGGGAGTTGAAAGCACTT--  
-AAA-----  
CTTAAAGAAGAGAAAAAATTATTCTGGTTTGAAAAACCCTTTTACTTTTCTTTTCGACTATCAACGATGGAATCGACC  
ATTTTCGATATATAGAAAATGAT-----CAATTTGCA---AATACTGTAAGA-----  
AATGAAATGTCCCAATATTTTTTTAACACATGTCCAAGTGATGGAAAACGAGTAATCTCTTTCACATATCTCCAGTTT  
GTCGGTTTTTGGGAAATGATACAAAAAAA---  
ATGTCTTTATGCGGTATGAAAGA AACTATATCCCAAAGACAAAAATCTGTATAATCATTGGGTTTCTACAAATGAACAAAA  
AAGGGAT-----AAGGTAAGCAAGGAGTTTATAAATCGAATAGAAGCTCTATACGGGGGA-----  
GATATTGTTCTCCAAAAAGGGT CAGATTATGCAATGATCGGGATGAAAAAGAA-----  
TGCTTACCCAAATGTCTGATCCCTTTTTAAACGGATCATACCGTGGAACAATAAAAGAATTGTATTCAAATTC AATTAT  
AAACGAT-----  
CCAATCACTTCGACATATAATTCCGGAGAAAAATTTTGGATAAATAGAATCCACAGTCTCCTTTTTTTGTGAT-----  
-----  
-----CTAAATGATCAA-----GCAATTAGGAAT-----  
AAATCTAGTGAAATTC AAGAAATAAAGAAAAAGATACCTCAACGGTTATACAGATTA ACTACCGATTTG-----  
GAACAAGACGAGGGGAGAAGATGAGAGAGAA-----  
TCTGTAGAGTTTCTGAAATTCGTTCAAGAAAAACTAAACATATGGTAATTTATGCTGATAACGAGGAGAATACGAATAT  
CTTTACTCATACTGGTGCCGGGACTACTTACGATCCAGAAAAT-----  
-----  
-----GATCAAATGGAAGAG-----  
GTGGATGTGATACGTTACACACAGAAACTGATTTTTCGTTCGGGATCTAATCAAAGGATCGATGCGCGCTCAACGACGGAA  
AACAGTTACTTGGGAAATGCTTCAAATAAATTTGCATTCCCCCTATTTTTGGATAGA---ATAGAC---  
AAAAACCTTTTTTTT---TATTTT---GATATCTCCAGAATCATAAAC-----CTAATTTTTAGGGATTGGACAAAG--  
-AAAAACCTGAATTTCAA ACTTCCA ACTTTAAAGAGGAA-----  
-----ACAAAAAAGAGGATGAG-----  
-----  
ATAGAAGAACTTGGGAGACTATTGCATTTGGTCAAGTAATAAGAGGTTTTCTGTTAGTAACCCAATCTATTCTTAGAAA  
ATACATCGTATTACCTTCATTGATAATAGCTAAGAATCTCGTGCATGTTATTATTTCAACTCCCCGAGTGGTATGAGG  
ATTTCAAGGAATGGAGTAGAGAAATGCATATTAATGCACCTATCATGGTGTTC AATTATCAGAAAGAAAATTT---  
CCGAAGAATTTGGTTAAAAGCCGGTATTCAGATAAAGATTCTATTTCTTTCTATTTGAAACCTTGGCGCAAATCTAACT  
ACGATCCCATCAT-----ATAGATCATCCGATGAAAAAAGAAAAAAA---CAAAT---

TCTTGT---TTTTTAACAGTCTGGGGAATGGAACTGACCTACCCTTT---  
GGTCCTGCCCGAAAGGGACCTTCTTTTTTTGAGCCTATTTCATAAAGAACTTGAAAAAAG-----  
-----TTTTAAAAAGGAAAAAGAAATGGTTTTTTATTTGTA-----  
AGAATTTTCAAAGAAAAAAAATATGGGTTATCAAAGAGTTCTA-----TTTATAAAAGGAGTAATGAAA--  
-GAACTTACAAAAGCAAAT-----CCCGTTTTCTTATTCGGACTAAAGAGA-----  
GTCTATGATGGAAGTGAAAATAGGAAA---GAT-----TCC-----ATAAGTAAT---AATAAG-----  
-ACAATTTCTGAATCACCTATTAGAAAATCACCTATTAGAAGTGGATCGATGGATTGGACAAATTCT-----  
TCACTGACAGAAAGAAAAAGAAAG---  
GATCTGTCTGATAAGACAACCACAATCAGAGATCAAATAGAAAGGATCAGGATCACAAGAGACAAGAAAACAAATTTCT  
AACTATAGAT-----  
ATGAATATCAGTCCTAATGAGACAAGTTATAGTGATAAAAGATCGGAATCACAGAAAACCTATTTGGCAAGTATCC---  
AAAAGAAGAAGTACTCGATTACTCTATAAATGGCGCTATTTTATGAAAAGTTTC-----  
ATTGAAAAGAAATACACAGAAATGTCTTTCTATGTATGATTAAC-----  
CTCCCTAGGATCAATACACAACCTTTTTCTTGAATCA---ACAAA-----  
AAGATTATAGATAAATACATTTCCAAT-----  
GATGAAAAAATCAAAGTGAATTGATGAAAAGAATAAAAAAAGATCCACTTTATCTTTATTTTCGACTAGG---  
AAGCTGCTTTCCACTATCTCT---AATAAGAAGACTAATAATTCAAAG---ATT-----  
CATTGTTTCGTTGTCTCAAGCATATGTATTTTACAAATTATCGCAAAAACCAGGTATTAAGAAG-----  
TATCGCTTGGGATCTTTATTTCAATACCGCAGA-----GCGTAT---TCTATTAAAGATAGAATAAAGGACTATTTG--  
-----GAAATAGAAAGAATATTTTCATTCCGAATCAAACAT-----AAGAAACCGGT-----  
AATTTTCGGAATGAAC-----GAATGGAAAACTGGTTAATA-----GGTAAT---TAT---CAATAC---  
AATTTTTCTTATACTAGATGGTCTAGATTAGACCCGCAAAAATGGCGAAATAAAGTAAATGAACAGTGTATGATAAAAA  
TAAGGATTCGAAAAAACCGATTTCATATTCATATGAG-----AAAGACCCATTAATTAATCACGAGAGACATATT----  
--TTGTATTCAGCGGATTTATTGCAGAAT---CATAAAAAAACTT-----  
AGCAAACGTTACAGATATGATCTTTTATCATATAGATATATCAAT-----TTTGAAAT-----AACTCGAGTATT--  
----TATAGATCCCTATTACAAGTGAACGAA-----  
Arabidopsis GCATTTAGCATTGGGTAGACCTCATAACAATAACTGTCCTAGCTCTACCGTATCTTTTGTTTCAT--  
----TTCTTCTGGAACAATCACAAACACTTTTTTGAT-----TATGGATCTACTACC-----  
-----  
AGAAATGAAATGCGTAATCTTCGCATTCAATGTGTATTCTGAATAATCTCATTTTTTCAATTATTCAACCATTTTCATTTT  
ACCAAGTTCAATGTTAGCCAGATTAGTCAACATTTATATGTTTCGATGCAACAACAAGATGTTATTTGTAACAAGTAGTT  
TTGTTGGTTGGTTAATTGGTCACATTTTATTCATGAAATGGGTTGGATTGGTATTAGTCTGGATACAGCAA---  
AATAAT-----TCT-----ATTAGGTCTAATGTAGTTATTAGATCTAAT-----  
----AAGTATAAGTTCCTTGTGTGCGAATTGAGAAATTCTATG-----  
GCTCGAATCTTTAGTATTCTCTTATTTATTACCTGTGTCTACTATTTAGGC-----AGAATACCATCACCCATT-----  
-TTTACTAAGAACTTAAAGGAACC-----  
-----  
TCGAAACGGGTGGGACTAACAGGACCAAGAGGTATCCACCGAAGAAGCTCCT-----TTTCCTTCTCTTTTT---  
TCGGAAGAAGGGGAAGATCTGGACAAA---  
ATCGATGAAATGGAAGAAATCCGAGTGAATGGAAAAGACAAAATTAATAAGGATGATGAATTCCAC---  
GTTTCGAACATACTATAACTATAAACT-----  
GTTTCTGAA-----AATCTATAT-----  
GGAAATAAAGAAAATTGCAATTTAGAATTTTTCAAATA-----  
AAAAAAAAGAGGATCATTTTTTATGGTTTGAAAACCATTTGTAACCTCTCGTTTTCGATTATAAAAGATGGAATCGACC  
AAACCGATATATAAAAAATGAT-----AAAATTGAA---AATATTGTAAGA-----  
AATGAAATGTCACAATATTTTTTTATACATGCCAAAGTGTGAAAAGAACAATATCTTTTACATATCCCCCAACCT  
TTCCACCTTTTTTGAATGATCCAAAAAGG---ATACCTTCA---TTTACAAAAGAAAAAAAACCTTTGACCAA---  
GTTTCTACTTATTGGAGTTTGATCCATGAAGAAAAAGGGAA-----  
AACTTAAAAAAGAATTTTTTAAATAGAATTGAAGCTTTAGATAAGGAATGGTCTGTTGAAAATATACTGGAAAAACGAC  
TCGCTTTTGTATAACGAAGCTAAAAAGAA-----  
TATTTACCTAAAATTTATGATCCTTTTTTGCATGGAATCTCTCGGGGAAGAATCAAAAAATTACCTCCATTCCAAATCAT  
AACCGAA-----ACCTAT---  
AGAAAAACAATTTAGGAGGATCCTGGATAAACAAGATTTCATGGTCTACTTCTGAAGATTAAT-----  
TATAAAAAATTTGAGCAACAATAGAAAAATTTAATAGAAAATCTTTGTCAATAGAG-----  
-----AAAAACTTTCTTTT-----  
TTTTCAGAACCCCAACAAGAAGAAAAAATTAATTCAGAAGAAGAAATCAAACCTTTCAA-----  
-----TTTTTATTTGATATTGTTAGAAGTATAGCAACGATCAA-----ACGCTTATAAAA-----

AATTTTATGGATTTCCCTGAAATCAATAAAAAAGTTCCCTCGATGGTCATACAAATTAATAAGTGAGTTG-----  
GAAGAATTGGAAGGCGAAAATGAAGAAAAT-----  
GTACCAATGGAGCCTGGAATTCGTTCAAGAAAAGCAAAACGTGTAGTGGTTTTTACTGATAAAGAGCCACATGGCGAGAT  
TTATACTAATCTCAAAGATAATCAA-----AATTCT-----  
-----  
-----GATCAAAACGATGAA-----  
ATGGCTTTGATCCGTTATTCGCAACAATCTGATTTTCGTCGAGAGATAATTAAAGGATCCATGCGTTCCTCCAAAGGCGTAA  
AACTGTTATTTGGGAATTTTTTCAAGCAAAAGTACATTCCTCCCTTTTTTTTTGATAGA---ATAGAT---  
AAACTTTTTTTTTTT---TCGTTT---GATATATGGGGGCTAAAAAA-----AAAATTATTAATAAATTTTCATTTGG--  
-AAAAA-----AAAATT-----GATAAAAAAGAAGAA-----  
-----GAACAATCAAAAAGA-----  
GAAGAAACAAGACGGATAGAAATTCGAGAAACTTGGGATAGCTTCCCTATTTGCTCAAATAATAAGAGTTTCTCTTTAGT  
AACTCAATCAATTCTTAGAAAATATATTATATTACCTTTATTGATAATAATTAATAAAGAGTGTCCGTATGTTATTATTTT  
AATTTCCCGAGTGGTCCAGGATTTAAAGGATTGGAAACGTGAAATGCATGTTAAATGTACTTATAATGGGGTTCAACTA  
TCCGAAACAGAATTT---  
CCAAGAAACTGGTTAACGGATGGTATTCAGATAAAAAATCCTATTTCTTTTTTATCTTAAACCTTGGCATAAATCTAAATT  
TCAAGCATCTCAG-----AAGGCTCGACTAAAAAAAACAAAAGACAAAAGGAGAA---  
AAAAATGATTTTTGT---TTCTTAACAGTTTGGGGAATGGAAACCGAACTACCGTTT---  
GGTTCTGCCCAAAGAAAGCCTTCTTTTTTTGAACCTATTTCTAAAGAATTAATAAATAAAGAAATCAAAAA---  
TTAAAAAAAAGTCTTTTGTGGTTTTAAAGATTTTCAAAGAAAGAGCACCCATTTTCTA-----  
AAAGTCGCAAAAGAACTAAAACTGGATTCTCAAAAATTTTATT-----TTTATAAAA--  
-GGAATTTCAAAACGAAAT-----CTAATTCATTATTTGGCCCGAGAGAA-----  
ATATATGAATTAATGAACCTAAAAAA---GAT-----TCA-----ATAATAAGT---AATCAG-----  
-ATGATTCATGAATATCTGTTCAA-----AATAAATCCTTGGAGTGGACAAATTCT-----  
TCACTTAGCGAAAAAAAATCAAA---AATTTGATTGATAGAAAAAGACAATCAGAAATCAAATAGAAGAAATT-----  
-TCAAAAGAAAAACAAAAC-----  
TTAACTAATAGTTGTACCAAACTGCGTTATGATTCTAAAATAATTGAGTCATCAAAAAAATTTGGCAGACATTC---  
AAAAGAAAAAATACCCGATTAATTCGTAAATCCATTTTTTTTTTAAATTTTGC-----  
ATCGAACAAATGTCTATAGCTATTTTCTAGGTATCATTAAAT-----  
ATTCCAAGAATTACTACACAACCTTTTTTTTGAATCA---ACAAAA-----  
AAAATTTCTGATAATATATTTACAAG-----AATGAA-----GAA---  
AATGGAGAAAAAAAATACTCTTTATTTTATTTTCGACTATAAAAAAT-----TTAATATCC-----  
---AATAAAAAAAAATGAGT-----TAT-----  
GACCTATGCTCTTTATCACAAGCATATGTATTTTACAAATTATCACAATAAAGTTAGTAACTTT-----  
TGTAATAATAAAGGCTGTTCTTGAATATAACATATGCATAACATCCTTTTTTGTAAAGAATAAATAAAGGTTTTTTTT--  
-----CAAGAACACGGAATCTTTCATTATGAATTGAAAAAT-----AAAACCTTTTTG-----  
AATTCCGAAGTAAAT-----CAATGGAAAACTGGTTACGA-----AGTCAG---TAT---CAATAC---  
AATTTACCCAGATTTTCATGGGCTAGATTAGTAACCCAAAATTGGAAAAATAAATAAATAAAGATTCTCTAGTTCTAAA  
CCCAAGTTTAACCAAA-----GAGGATTCATATGAA-----AAAAAGAAATTTGATAATTATAAAAAACAAAA---  
--TTTTTTGAGGCCGACTCATTATTAAT---CCAAAACATAATGTA-----  
AAAAAAGATTCTATATATAATCTTTTTTGTCTATAAATCTATTTCAT-----TCTACAGAAAAAAT-----  
-----  
Atropa GCATCTAGCATTGGGTAGACCTCATAACAATAACTGTCCTAGCTCTACCATATCTTTTGTTCAT--  
----TTCTTCTGGAACAATCACAACACTTTTTTGTAT-----TATGGATCTACTACC-----  
-----  
AGAAATTC AATGCGTAATCTCAGCATTCAATGTGTATTCTGAATAATCTCATTTTTTCAATTATTCAACCATTTTCATTTT  
ACCAAGTTCAATGTTAGCCAGATTAGTCAACATTTATCTCTTTTCGATGCAACAACAAGATCTTATTTGTAACAAGTGGTT  
TTGTTGGTTGGTTAATTGGTACATTTTATTGAAATGGCTTGGATTGGTATTAGTCTGGATACGGCAA---  
AATCAT-----TCT-----ATTAGACCGAATGTACTTATTCGATCTAAT-----  
----AAGTAC-----CTTGTGTTAGAATTGAGAAATTCTATG-----  
GCTCGGATCTTTAGTATTCTCTTATTTATTACCTGTGTCTACTATTTAGGC-----AGAATACCCTCACCCATT-----  
-  
CTTACTAAGAACTGAAAGAAGCCTCAAAAACAGAAGAAAGGGTGGAAAGTGGGAAGAAAGAGATGTAGAAATAGAAAC  
TGCTTCCGAAATGAAGGGGACTAAACAGGAACAAGAGGGATCCACTGAAGAAGATCCTTATCCTTCTCCTTCCCTTTTTT  
CGGAAGAAGGGTGGGATCCGGACAAAATCTATGAAACGGAAGAAATCCGAGTGAATGGAAAGGACAAAATAAAGGATAAA  
TTCCACTCTCAACTTACAGAGACAGGCTATAACAATATTAATACTAGTAATAGTCCAATTTATTATTATGAAGATTCTTA

TCTGAATAATAATAACACGGGGAATCCAGAAAATTTTAAATTGCAACTGCTTGATAAAAAAATGAAAATAAAGACCTCT  
TCTGGTTTTCAAAAACCTCTTGTGAGTCTTCTTTTCAATTATAATCGATGGAATCGACCATTTTCGCTACATAAAGAATAAT  
CGATTTGAACAAGCCGTAAGAAGTCAAATGTGCAATATTTTTTTGACACATGTAAAAGTATGAAAAACAAAGAATATC  
TTTTACATACCCGCCAAGTTTTATCAACTTTTTGGAAAATGATAAAAAGGAAGGCTACCCTTATTGTCACTCCAAAAACCC  
TCCCTAATGAACTGGACAATCAGTGGGTTTTCTACCAACAAAAGAAAAAAGTAATAATCTGAATAAGGAATTTTTAAATCGA  
CTAGAAGTTCTAGACAAGGAATCTCTTTCTCTGGATATACTCGAAACAAGGACTAGATTGAGTAATGATGATACTAAAA  
AGAATACGTGCCTAAAATGTATGATCCTTTGTTAAATGGACCATATCGAGGAACAATCAAAAAAGGGTTTTTCACCTTCAA  
TCATAACAATACTTCGATAGAAAATTTGAAAGAGAGAGTTATACTAAATAGGATTACTACTATCTTTCTTCCGAATACT  
GATTACCAAGAATTTGAACAAAAAGTGGATACGGTTGATAAAAAACCATTATCAACAGAAAATTGACGAGTTCTTAACTTT  
AATCAATGAATTTGGTAACGAACCAAAAATCGAGTTTAAAAGTGAATTCAGAAAAAAAATAAAATTTGTAATAATTTCTAT  
TCAATGCAATTTGATCTTAATGGGACAAAATCTGTAAAAAATCGATTTGGAATAAAGAAAATCAGTAAAAAATACCTCGC  
TGGTCACATAAAATTAATCACCGAATTTGAACAACAATTTGGGTGAATTTAAAGAGGGCGTATCACTGGATCATCAAATTCG  
TTCAAGAAAAGCCAGACGTGTAGTGATTTTTACTACCAACATGGACAGTGACGATCCTGAGGTCAAAGAGGAAGTGGCTT  
TAATAAGCTATTTCGCAACAATCAGATTTTTCGGCGAGGTATAATTAAGGCTCTATGCGGGCTCAAAGGCGCAAAACAGTT  
ATTTGGAACTATTTCAAGCAAATGTGCATTCCCTTTTTTTCTCGACAGAATAACCCCCCCCCGCTTTTTTTCTTTTGA  
TATCTCTGAACTGATTAAACCAATTTTTCGAAATTTGGGCAGGTAAAGAAGGAGAATTCGAGATTATAGAATTTAGAGAAG  
ACAACCAAAAAGAGAAGAGAAAAAAGAAACGGACAAAAAGGGGAGACCAAAAGCAAAAAGGAAAAAGCACGGATAGCT  
ATAGCCGAAGCCTGGGATAGCATTCTTTTTGCGCAAATAATAAGAGGTTCCATGTTAATAACTCAATCAATTTCTCGAAA  
ATATATTTCTATTACCTTCATTGATAATAGCCAAAAATCTCGGGCGTATGTTATTCTTGCAACTTCTGAATGGTCTGAAG  
ATTTGGAGGAATGGAATAGAGAAATGCATATTAATGTACTTATAATGGTGTTCATTATCAGAAACAGAATTTCCAAAA  
AATTGGTTGAGGGATGGGATTCAGATCAAAATTTTTATTTCTTTTTGTCTGAAACCTTGGCATATATCTAAACTGTACCC  
CTCCCATGAAGAGCTAATGAAAAAGAAAAACAAAAAGATGATTTTTGTTTTTAAACAGTTTGGGGAATGGAAGCTGAAC  
TTCCCTTTGGTTCTCCACGAAGTCGCCCTTCTTTTTTGAGCCATTTTTAAGGAACTCGAAAAAAAATGGAAAATTA  
AAAAAGAAATATTTTATAACTCTAAAAGTTTTAAAAGGAAAAACAAAATTTTATAGAAAGATTTCAAAAAGAACTAAAA  
ATGGCTTATCAAAAGTATTCTATTTCTAAAAAATAAGAAAAGAACTTTCAAAAATAAAGCTAATTGTATTATTTAGAT  
TCAAAGAAATATCTGAATCGAATGAAACGAAAAAAGAAAAAGATTCTCTAATTAGTAATCAGATAATTAACGAATCATT  
AGTCAAATGAACTGTAAATTTGGCCAAATTTCTTACTGATAGAAACCAAAATGAAGGATTTGACTGATAGAACAAGTAC  
AATAAAAAATCAAAATAGAAAGAATTACAAAAGAGAAAAAAGAAAGTAACTCCAGAAAATAGACATTAGTTCGTAATAAAACAA  
ATAATATTTAAAAATTCGAATCGACAAAAAATTTTTTCAAATATTACAAAAGAAGAAATCAGTAAATATGGAATTTCC  
CATTATTTTATAAAATTAATTCATTCAAAGATTATACATCAATCTATTTTTTATCTATCATTAAATTTCCAGAAATTAATAC  
ACAACCTTTTCTTGAATCAACAAACAAATTTGATTGATAAATACATTTCCAATAATGAAATAAATCAAGAAAAAATTAATA  
ATAAAAAAAAATTCACTTTATTTTCGACTCTAAAAAAGTCACTTTATAATATTAGTAATAAAAAATTCACATATTTTTTTT  
GATTTATCTACTTGTGACAAAGCATATGTATTTTACAAATATCACAAACCCAAGTTATTAATTTGTCTAAATTTAGATC  
TGTTCTTCAATATAACAGAACGTCTTTTTTCTTAAAGACTAAAATAAAGGACTATTTTAGAACACTAGGAATATTTTATT  
CTGAATTAACATAAGAACTTCAGAGTTATAGAATCAATCAATGGAAAAACTGGTTAAGACGGCATTATCAATACGAT  
TTATCTCAGATTAGATGGTCTAGATTAATGCCACAAAAATGGCGAAATAGGGTTAATCAAAGTTGTATGGCTCAAAATAA  
AAATATAAATTTAAACAAATGGAATTCATATGAAAACGACCAATTAATTCATTACAAAAAGAAAATGATTCTGAACTCT  
ATTCATTATCAAACCAAGAAGATAATTTTTCAAAAATGTTATAGATATGATCTTTTATCATATAAATCAATTAATTATAAA  
AATAAAAGTGACTCATTATTTCTAGATTACCCTTTCAAGTAAATAAAAACTCGAAATTTCTTATAATTTCAAACACGTC  
CAAACACAACCTTTTTGATATGCCCGGCAATCTTTATATCAATAATTATCTAAGAAAAGGCAATATTCTATATATAGAAA  
GAAATCTCGATAGAAAATATTTTGATTGGAAAATATCCATTTTTCTCTTAGACAAAAAGGAGATATTGAGGCCTGGGTT  
AAGATCGATACCAACAGTAATCCAAATACTAAATTTGGTATTAATAATTATCAAATAATTGAGAAAATTTGATAAAAAAGG  
CCTTTTTTATCTTACAATTCATCAAAATCCAGAAAACACTCAAAAAAATTTCAAAAAAGTATTTTTTGGATTGGATGGGAA  
TGAATGAAAAAATATTTAATCGTCCCATATTCAATCTGGAATTTTGGTCTTCCCAGAATTTGTACTACTTTATAATGTA  
TATAAATAAAAACCTTGGATTATACCAAGCAAATTAATCTTTTAAATTTGAACACAAATGAAAATGTTAGTCAAAATAA  
AAACATTAATAAAAACCAAAAACAAAACCTTTTTCTACCATCAAATAAAAAAATAAAGAATCGAATTCAGAAGCAAAAAG  
AACCCGAAATCAAGGAGAAAAGAGCGTGGATCAGATATAGAAAACAAAGTAAATCCGGGCCCTGTTCTCTCAAAACAT  
CAAAACGATCTTGAAAAAGATTACGCGGAATCAGACACAAAGAAGAGTAAAAAGAAAAACAATCAAAAAGCAACACGGA  
AGCAGAACTTGATTTGTTCTTGAAACGTTATTTGCTTTTTCAATTGAAATGGAACGATGATTTGAATCAAAGAATGATCG  
AGAATATCAAGGTGATTGTCTCCTGCTTCGACTGATAAATCCAACCAAAATTAGTATATCGTCAGTTCAAAGGGGAGAA  
ATGAGTTTGGATATAATGCTGATTACGGGGAATTTAACTCTTACAGAATTGATGAAGAAGGGAATATTGA

Buxus

-----  
-----  
-----  
-----  
-----

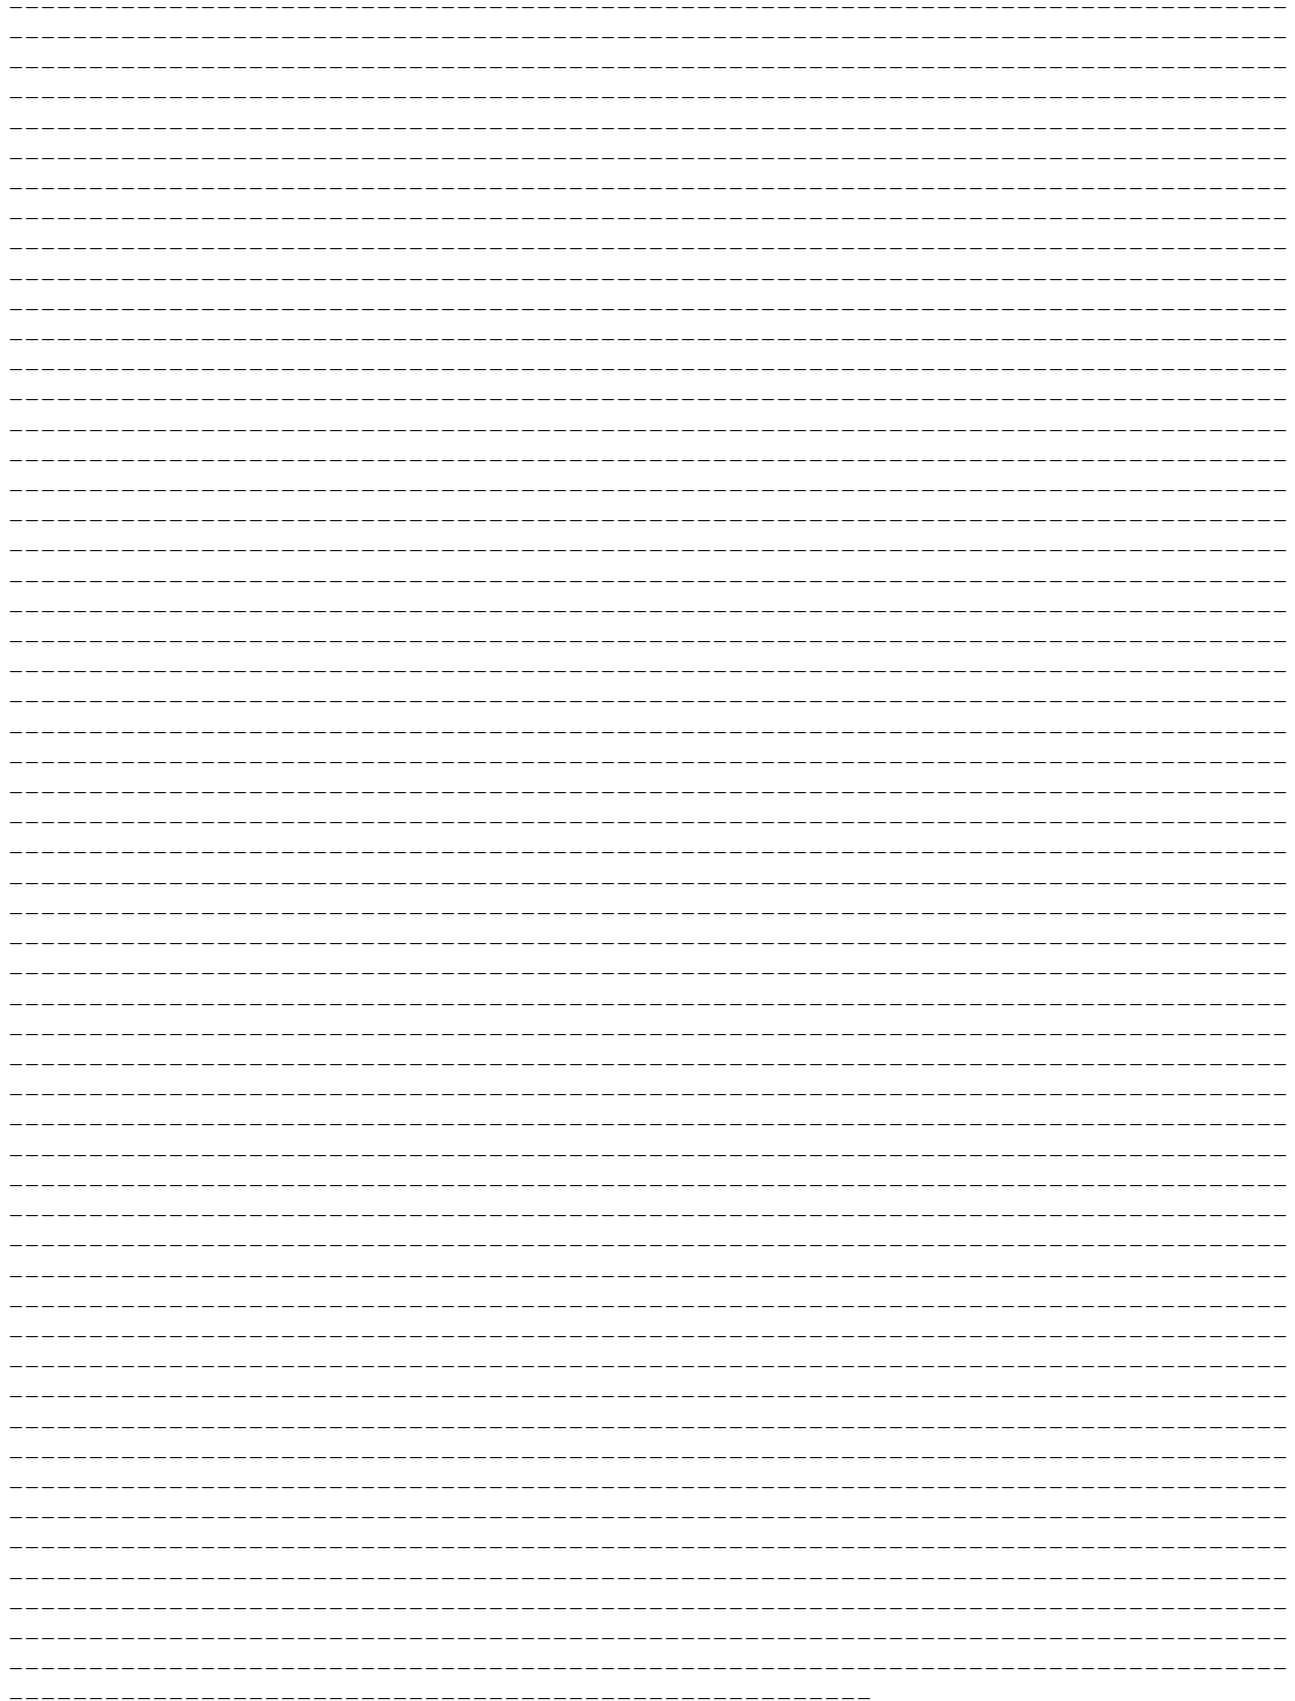

Calycanthus GCATCTGGCAATGGGTAGACCTTATAACAATAACTGTACTAGGTCTACCATATCTTTTGTTCAT--  
----TTCTTCTGGAAGAATCACAAACATTTTTTTTGGAT-----TATGGATCAACTAAC-----  
-----  
CTAAATTC AATGCGTAATTT CAGCATTCAATCCATATTCTTGAATAATTTTCATTTTTCAATTATTGAACCATTTTCGTTTT  
ACCAAGTTCAACGTTAATCAGATTGGTCAACATTTCTATGTTTCGATGCAACAACAAAACGCTATTTGTAATAAGTAGTT  
TTGTTGGTTGGTTAATTTGGTACATTTTATTCATGAAATGGGTTGGATTGATATTATTCTGGATACAGCGA---  
AATCGT-----TCA-----ATTAGATCCAATCCACTTATTAGGTCTAAT-----  
----AAGTAC-----CTTGTGTCAGAATTGAGAAAATTTTTG-----  
TCTCGAATGGTTAATATTTTCTTATTTATCACCTGCGTATACTATTTAGGA-----AGAATACCTTCGCCTATC-----  
-CTGACTAAGAAAACCTGAAAGAAAACCTTCAGAAAACAGAA--GAAGGGGAGGAAAATGAAGAC-----  
-----  
GAAACAAATGTAGAAATCGAAAAATTTTCTGAAGCGAAGGAGACTAAACAGGAACAAAAGGATCATTGCGCGAAGAAGA  
C-----TCT---TCCCTTGGT---TCGGAAGAAAGAGAGGACCCAAACAAA---CTCTAT-----  
----GGAAAAAAAGGAAG-----  
-----  
GGGTATCAAGAAAATTGGAAGTTCGAAATACTT-----  
-  
AAAGATAAAGACCTCTTCTGGTTTGAAAAACCTATTGTAACCTCTTCTTTTCGACTATAAACGATGGGATCGTCCATTGCG  
ATATATAAAAAATGAT-----CGTTTTGCA---AATGCTGTAAGA-----  
AATGAAATGTCACAATATTTTTTTCACAAATGTCCAGTTGATGGAAAACAAAAATATCTTTTACATATCCACCTAGTTT  
GTCAATTTTTTTTTGAAATGATAGAAAAACAT---CTTCTTTG---TGTACGACAGAAAAACTATCCCCGGAAGAT---  
CTGTATAATCATTGGGTTTATACCAATGAAAAAAAAGATGC-----  
AACTTGAACAATGAGTTCATAAATAGAATAGAAGCTCTAAACAAGGGATCTCTTTCTATGCATGTGCTCGAAAAAAGGAC  
CAGATTATACAATGATAAGAATGAACAAGAA-----  
TGCTTGCCTAGAATGTACGATCCTTTTTTGAACGGACCATACCGTGGAAACAATCAAAAAAGTGTATTCACACTCAATTCT  
GGATGCT-----  
TCAACTACTTCGACAGAAGATTCCCTAAGAGTGGTTTGGATAAATAAGATTGATGATATCCTTCTACTAAT-----  
-----TACCAAGAATTTGAAGAGAAAATGGATCCATTTAATGGAGAATCATTGTGCGACAGACATT---  
AACCATTCCCTGGCCTCCACCAGTGAATTAGCTGGGGAATCACCAATGGATTTTCGTTTTAATTTGAAAGAAGGACTTGT  
CTTACCAGCCGAACAAAAACAAAGAAGATTTGATTGAGAAAATCCAATGAAATATTTGAAA-----  
-----TTTCTATTGATGCAATTACAACCTGATACACCAAATTAT---AAAACAATTCAAACT-----  
AAATCTATTGGAATAGAAGAAATTGGTAAAAAGGTTTCTCGATGGTCATACAAATTGACCAACGATTTG-----  
CAACAGCAGGAAAGGGAAAATGAGGAAGAA-----  
TCAACAGAAGATCATGCGATTGTTCAAGAAAATCCAAACGCGTGGTAATTTATACTGATAACGATAAGAATCCCAATAC  
TCCTATTAGTACTAATGGT-----  
-----  
-----AACCAAGCGGAAGAG-----  
GTGGCTTTGATACGTTATTTCGCAACAATCGGATTTTCGTGCGGATCTAATCAAAGGATCTAGGCGTGCTCAAAGACGTAA  
AACAGTTACTTGGGAAATATTTCAAGCAAATGTGCATTCCCCACTTTTTTTGGACAGA---ATAGAC---  
AAAACATTTTTTTTT---TCTTTT---GATATCTCCGGAACGATTAAT-----CTAGCTTTTAGAAATTGGACGGAG--  
-AAAGGCTCGGAATTCAAAACCTTCGAACTCTGACGAGAAAGAGACAAAAGAAAAGGAG-----  
-----AAAAAAGGGAGGATAAAAA-----  
GAGGAGAATGAACGGATAGCAATAGCAGAACTTGGGATACTATTATATTTGCTCAAGCAATAAGAGGTATTATGTTAGT  
AACCCAATCGATTCTTAGAAAATACATCGTATTGCCTTCATTGATAATAGCTAAAAATCTTGTCCGTATGTTATTATTC  
AATTCCCCGAGTGGTATGAGGATTTGAAGGAGTGGAAATAGAGAAATGCATGTTAAATGTACCTATAATGGTGTTCATTA  
TCAGAAACAGAATTT---  
CCAAAAGACTGGTTAACAGACGGTATTTCAGATAAAGATCCTATTTCTTTCTGTCTGAAACCTTGGCACAGATCTAAGCT  
ACGACCCCATCAT-----AGAGATCCAATGAAAAAGAAAGGA---AAA---  
AAAGACAATTTTTGT---TTTTTAACAGTCTGGGGAATGGAAACCGAACTACCTTTT---  
GGTTCTTCCAGAAAACGACCTTCTTTTTTTGAACCCATTTTAAAGAAGCTCGAAAAAAAATTAGAAAA---  
GCGAAAAAAAATATTTTTTTAGTTCTAAGCGTTTTAAAGAA-----TGTTTTCGA-----  
AAGGTCTCCAAAGAAAAACAAGATGGATTAGAAAAATAGTTTTA-----TTTATAAAAAAATAATCAAA--  
-GAGTTTGCAAAAGTAAAC-----TCCATTTTATTATTTGGACGCAAGAAA-----  
GTATATGAATCGAATGAAAATAAAAA---GATTCCATAACC-----ATAATCAGT---AATAAG-----  
-ATTCTTAGTGAACCGACCATTTCGA-----ATTAGATCCATGGATTGGACAAATTAT-----  
TCACTGACAGAAAAAAAATGAAA---GATCTGGCCGACAGGACAACCACAATAAGAAATCAAATAGAAAGGATC-----



-ACAAAAGAAAAAGAACAATATTTCTAACTCCAGAT-----  
AGAAATGGTAGTCCTAACGAGACAAGTTGTGATGATAAAAGATCTGAATCACAGAAACATATTTGGCAGATATCA---  
AAAAGAAGAAGTGCCTGGTTTCATACGTAATGGCGCTATTTTATTAAATTTTC-----  
AGTGAAAGAATATACATAGATATCTTTCTATGCGCCATTAAT-----  
ATTCCCAGGGTCAATGCACAACTTTTCTTTGAATCA---ACAAAA-----  
AAAATTCTCGATAAATACATTTACAAT-----GATCAAAGAAAGAAAGAAGGAATTGATGAAACAAATCCAAATAAA--  
----CTAATTTTCGATTAGCAAAAAG-----TATTTTTCTAAT-----ATTAGTAATAAGAAATCACGG---  
ATTTATTGG---GATCTATCTTCTTGTCCCAAGCATATTTATTTTACAAATTATCACAAACCCAAGTTATTAACAAG--  
----TATCGCTTGAAATCTGTACTTCAATATCGC-----  
GATCTTTTTCTTAGGGATAGAATAAGGGATTATTTG-----GGGACACGAGGAATATTTGATTCCAAGTTT--  
-----AAGAACTTCCG-----AATTCTGGAATGGGT-----GAGTGGAAAACTGGTTAAGA----  
--GGTCAT---TAT---CAATAC---  
AATTTATCTCAGACTAGATGGTCTAGATTAGTATCAAAAAAATGGCGAGATAGAGTCAATCAACATCGTACGATTCAAAA  
TAAAGACTAC---AAA-----AGGGATTCTATGAA-----AAAGACCAATTCATTACGAGAAACAAAAT-----  
--GATTCTGTAGTAAATTCATTGCCGAGT---CAAAAAGAAAAATTT-----  
CAAAAACACTACAGATATGATCTTTTTTTCATATAAATATATTAAT-----  
TATGGAGTTAATTATGGAGATAGTAAAGACTCATACCGATCACCATTACAAGTAAACGAG-----  
Ceratophyllum GCATCTAGCATTGGTTAGACCTCATACAATAACTGTCCTAGTTCTACCGTATCTTTTGTTCAT--  
----TTCTTCTGGAACAATCACAAAACTTTTTTGAT-----TATGGATATACTACC-----  
-----  
AGAAATTC AATGCGTAATCTCAGCATTCAATGTCTATTCTAAATAATCTCATTGTTCAATTTTTGAACTTGTTTCATTTT  
ACCAAGTTCAACATTAAGCAGATTAGTTAACATTTCACTATTTTCGCTGCAACAACAAGATGTTATTTGTAACAAGTAGTT  
TTGTTGGGTGGTTAATTGGTACATTCTATTTATGAAATTGGTTGGATTAGTATTAGTCTGTATACGACAA---  
AATCTA-----GCT-----ACTAGATCTAATCGACTTCTTCACTCTAAT-----  
----ATGTAC-----CTTGTATCAGAATTTAGAAATTGGACG-----  
GCTCGAATCTTTAGTACTCTCCTTTTTTATCACTTGTATGTACTATTTAGGCGTACACAGAGTAAAGTTACCTATT-----  
-TTAACGAACAGATTGAAAAAACCTCAGAAATAGCA--GAACAGAAAAAAGTAAAGAA-----  
-----  
GAAACAGATGAAGAAATCGAAAAAATTTGAAACGAAGGAAACGAAGAAGGAACAACAAGAATTCACCGACAAAGTCCA  
T-----TCGCTTTAT---TTCGAAGAACAGGAGGATCCA-----  
ATCGAAGAACAAGGGTATCCATACAAAAGAAATGAAACAAAAGAAAAAAGAACTAGGAAAAGAAAAAAC-----  
-----  
AAAAAGAATGAATTCACAAGAATATCCCCAAATATGAAACTTTGGATCTTGACAGGAATCAAGAAAAA-----  
TTGGAATTGACAATACTT-----  
AAACAAAAGACGAACCTCGTCTGGTTTTGAAAAACCTCTTGTAACCTCTTCTTTTCGACGTTAAACGATGGGATCGTCCATT  
GCGACATATTAACACAGT-----CGATTTGAA---AATACTATAAAA-----  
CAAGAAATGGCACAATACTTTTTTACACATGTACAAGTGACGGAAAACAAAAATTTCTTTTACATATCCACCCAGCTT  
ATCAACATTTTTTGAATGATGCAAAGAAAG---ATATCTTTG---TGCACGATAGAAAAACAATCGCCTGAAAAC---  
ATGTATAATCATTGGCTTTATACCAATGAACAAAAAAGGCAC-----  
AATCTGAGCAATGAATTTCTAAATCGAATCGAAATCTAGACAAAGGATCTTCCGCTCTAGATGTGCTTGAACAAAAGAA  
CAGATTGTCTAATGATGAGAATAAACAAGAA-----  
TGCTTGCCAAAGATGTATGATCCTTTTTTGTAGTGGGCCATCCCAGGAAGAATAAAAAAAGGGTATTCCACCAGGCGAAT  
CATGAAT-----GATTCAAGT---  
GCTTCAACGAAAGGTAAGGTTTTGGATAAATAAGATCCATGGTATCTTTCTATTGAT-----  
TATGTACAATTGGAACATAAAAATAGATACTTTTCTCGACGAATCATTATCGGGGGAATCA---GGAACCTCGTTC-----  
-----CCTGGGGAATCTGCACCCTTAAAA-----GGACTCTCTTTATCG-----  
ACAGACAAAAAAGAATTGATTGAGAAAATCAAGAAAAGTCTTTGAAA-----  
----TTCTTATTTGATGTAGTTACAATAATCCAAATACCCAA-----ACAAGGGATAAA-----  
GAATCTATTCTAATAAGGGAAATCCATAAAAGAGTTCTCAATGGTCATACAAATTGATCCGTGATTTG-----  
GAAGAAGAGGAGAAGGAACTGAGGAAGAA-----  
CCAAAGCAGGTTTTTGAATTCGTTTTAAGAAAAGGCAAACGTGTCGTAATTTATACCGATACCAATGATAAAACCAATAC  
AGATACTAGTACCAGTACTCTAGTAATCCA-----  
-----  
-----GCGGAGGAG-----  
ATAGCTTTGATACGTTACTCGACCAACCGGATTTTCGTGGAATCTGATCAAGGGATCCATACGCTCTCAAAGACGTAA  
AACGGTTGTTTGGGAATTTTCAAACGAATCTACATTCACCGCTTTTTTTGGATAGA---ATTGAT---AAAAT----





TTTTTTTATGCATGTGCGAAGTGATGGAAAAGAAAGGATCTCTTTTACATATCCAGCTAGTTTGTCAACTTTTTTGGACAT  
GATAAAAAAAAAATAATTATTTTTTCGCAACCGAAAACTATCCTCTGATGAATTTTCTACACATTGGAATTACTACTAATA  
ACCAAAAAATTAAGAACTTAAGCAAGGAGTTTAGAAATCGACTTGAGGGTTTAGATAAAGGATCTCTTATTCGGGATATA  
CTCGAAAAAAGGACTCAATTGTGTAATGATAAGACTAAAAAAAAATACTTACCTAAAACATATGATCCTTTATTAACGG  
ACCTTATCGTGGGAAGAATCAAAAAATTCTTTTACCCTCAATCCTAAATACAACCTTATATCAAAAAATAAGATAAGAACGC  
CTTGGATAAATAAAATTCACAATCTAATTTTTTATTAATGATTATCACGAATTTGAACAGACAATAGACCGATTTAATCGA  
AAATCATTTTCAAGCGAAGAAGTGCAGTCTTTATTGACCGAACGGGAACGAGAACACATCGATTCCGAAGACCGAATAAA  
AAGTTTGAATTTTTTATTTCGATGCAGTTATAACGGATCCCAATGATCAAAAAATTAGAAAAAAGCGATAAAAGAAATTA  
GTAAAAGAGTTCCTCCGGTGGTCATACAAATTAATCGATAATGTATACCAAGAAGTGGGAGAATACGACGAAAATGTAAGA  
GGGAAACATGCATTTTCGTTTACGAAAAGCCAAACGTTTAGTGGTTGCTGTTGATCACCAGACAAAAGGGGATGTGTCTTT  
GCCCCATTATTTGGAACAATCGGATTTTTCGTCGATATATAATAAAAGGTTCCATGCGCGCACAAAAGACGTAAAACCGTTA  
TTTGGAAACCGATTCGAAGCAATGCCATTCCCCTCTTTTTTGGACAGAATAGACAAAACCTTTATTTGTCTTTTGGAT  
ATTTCCCAACTGATGAAAGTAATTTCTCGAAATTTGGATGGTAAAAAATAAAAACCAAAAACTTTCTGATTATACAAAACGC  
AAAGACAAGAAAATTGGACAAAAAAGAAAAAAGAAAGCTCAAAGGCGAAAAGATACCAAAGACAAGAAATGGTACGTATAA  
ACAAGCAGAAGGATGGGATAAGCGTTTACTTACTCGAATACTAAGAAGTTCTATGTTAGTAATCCAATCGATTCTTAGA  
AAATATATTGTATTACCGTTATTGATAATAGCTAAAAATGTGGTTCGCATACTATTATTCCAAGATCCCGAGTGGTCCGA  
GGATTTTAAGGATTGGAATCGTGAAATTTATGTTAAATGCACCTTATAGTGGTGTAAATTTATCTGAAACAGAATTTCCGA  
AAAACCTGGTTAATAGAAGGTATTTCAGATAAAGATCCTATTCCCCTTTACCTGAAACCCTGGCACGGATCTACGATACAA  
TCCTCTCATAAAGATCCAAAAAGTGAACAAGAACTGATGTTTGTTTTTTAAACAATTTTTGGGCTGGAACTGACATGCC  
GTTCCGTTTCTCCCCAAAAACGACGTTTCTTTTTTGAACCCATTTTTTAAAGAACTAAAAAAAAAAATTCGAAAATTGAAA  
CTAAGTCTTTTATAGTTTTTAAAGGATTTTTAAAGAAGGCAAAATAAAAGAAGTTCAAAAATAAACTTGAGAGAAATCGAG  
AAATTGAGGGAAACTCAAAAAATTCGATAATCAGTAAGCAGATGATTACGAACCGTCTATTGAAATTTTATCTATGGA  
TTGGACGAAATTATCCCGGACTGAAAAAAAATGAAAGATCTGACTAATAGAACAAGCAGAATCAGAAATCAAATATATA  
AAATTACAAAAGAAAAGAAAAAGGATCGCTAACTCAAGAAACAAATATTAGTTTGAACAAAACCAACGTATTCTGTAAA  
ATATTAGACCCATCAAAAAGGATTTGGCGGATATTAAAAAAAGAAACGCTCGATTAATCCGTAATCCTATTTGTTTCT  
AAAATTTGGCATTGAAAAGATATACAGAAATTTTTTATATCTACCCTTACTATTCCAAGAATCAATACAAAACCTTTTC  
GTGAATCAACAAGAAAACAAATGAAAATTTTGGAGAAAACATCCACAATAATGAAGCAAATCCCGAAAAGAAATTAATAAA  
ACAAAATAAAAATAGAATTTATTTTCGACTATCCAAAAATGATTTTCTAAGACTAGTAATAAGAATTCAAAGATTTCTTGTA  
TTTTATTGTCTTTTTACAAATCACAAGCATATGTATTTTTACAAATTTATTACAAGTCCCAATTTTGAACCTTTTATAATTTAA  
GACCCGTTCTTCAATATCACGGAACATCTCTATTTCTTAAAGATGAAATAAAAGATTTTTTTGAAAAACACGGAATTTT  
AATTACCAATTAAGACATAAACCCCTTTGGAATTTTTGGAAGGAATACACGAAAACTGTTTAAAGCGGGCATTATCAATA  
TGATTTATCTCGGATTAATGGGCTAGATTAGTACCACAAGAATGGCGAAAATAGAGCCAATCAACACTGTATGGCTCAAA  
ATAAGATTTAATTAAGAGATTTCGTATGAAAAAATGGATTAACCTATTACGAAAAACAACATTTTTTTTGAAGCAGAC  
CTATTACGTAATCAAAAAATCGAATTTTAAAAAACACTATAGATATGATCTTTTATCATATAAAATCGCTTAATTATGAAGA  
TAAGAAAGACTCGTATATTGATAGATCACTAGTCCAAGTAAATAATAAAGAAGAGTATTATTCTAATTACAATAGAAAGA  
AAGTAAAATTTGTTGGCTATGCTGGGAAGTATCTCTATCAATAATTATATAGGGGAAGATGATATTATGGATATGGAAAA  
TTCTTGTATAGAAAATTTTTGATTGGAGAATTTCTTAATTTTTGTCTTAGAAATAAGGCCAATATGGAAGCCTGGGTTGA  
TATGGATACTGGTACCAGCAGTAATCAAAATACTAGGATTGGGTCCAATAATTATCAAAAAATTAATGCAATTAATAACA  
GAGTCCCCTTTTATCTTACAATTCATCAAGATGAAGAAATTAACCCATCCACTCAAAGGGGTTCTTTTGTGATTGGATG  
GGAATGAATGAAGAAATACTAAGTTGTCCTATATCAAACCCAGAATCTTGGTCTTCCCAGAATTTGTACTACTTTTTAA  
TGCATATAGAACGAAACCCTGGATTATACCAATCAAATTACTTCTTTTCAATTTTAAATGGAAATAGTAAGAAAAATAGAA  
CCGAAAGAAAAGAGGCGGATCTTTTTTATATCACCTACTCAAAAAGAATATTTTTGAATTATCGAATCAAAGTAAAGAAGAA  
AACGAACCTCGCAGACCAAGGAACCTCCGAGATCGGATGCACAAAAGCAAGTAATTTTGGATCAGTTCTCTCAAACCAAGA  
AAAAGATGGTGAAGAAAATTTATACGGGATCGGACATGAAAACCCGTATAAAGAAAAAGCAATCCAAAAGAGAAACCGAAG  
TACAGCTCGATTTCTTCTAAAAAGATATTTGTGTTTGCAGTTGCGATGGAGGGGGGCTGTTTCTTTCAGAGAAAAAATA  
CTCAATGATATGCAAGTATATTGTCACCTGGTTCGACTAATAAATCCTAGCGACGTTGCTATAGCCTCTATTCAAAGGGG  
AGAAATGAGTCTGCCTATTTTTGATCCTAAGAAGAAGTTTCGCTCTTAAAGAATTGACGAAAAGGGGGAATGCTTATTATCG  
AACCCCGTCTGTTTGTCTGTAAAAAATGATGGACAATTTTTTCTATATCAAATCGTAGGTATTGCATTGGTTTATAAGAAT  
AAGCGCAAAATTAATAAAGATACCAAGAAAAGGGCTATGTTGATAAAAAAGATTTTTGATGAATTCATTG  
Coffea GCATCTAGCATTGGGTAGACCTCATAACAATACTGTCCTAGCTCTACCATATCTTTTGTTCAT--  
----TTCTTCTGGAACAATCACAAACACTTTTTTGGAT-----TATGGATCTACTACC-----  
-----

CGAAATTTAATGCGCAATCTCAGCATTCAATGTGTATTCTGAATAATCTCATTTTTTCAATTATTCAACTATTTTCAATTT  
ACCAAGTTCAATGTTAGCCAGATTAGTCAACATTTATATATTTTCGATGCAACAACAAGATGTTATTTGTAACAAGTAGTT  
TTGTTGGTTGGTTAATTGGTACATTTTATTTCATGAAATGGCTTGGATTGGTATTAGTCTGGATACGGCAA---  
AATCAT-----TCT-----ATTAGATCGAATGTACTTATTTCGATCTAAT-----  
----AAGTAC-----CTTGTGTCAGAATTGAGAATTTTTTATG-----

GCTCGGATCTTTAGTATTCTCTTATTTATTACCTGTGTCTACTATTTAGGC-----AGAATACCGTCCCCCATT-----

CTTACTAAGAACTGAAAGAAACCTCAAAAACGGAAGAAGGGGTGGAAAGTGAGGAAGAAGGGGATGTAGAAATAGAAAC  
AACTTCCGAAATGAAGGGGACTAAACAGGAACAAGAGGGATCCACCGAAGAAGATCCTTCTTCCCTTTTTTCGGAAG  
AAAAAGAGGATTGCAACAAAATCGATGAAACGGAAGAAATCCGAGTGAATGGAAAGGAAAAACAAAGGATGAATCCAC  
TTTCACTTTACAGAGACAGGCTATAACAATATCCCATTTTATGATTATGAGGATTCTTATCTGAATATGAATGGGAATCA  
AGAAAATTGGAAATTAAGGATAAAAAAGCTGCTAAAAGAAAGGAACTCTTCCGCTTTGAAAAACTCTTGTAACACTC  
TTTTCGATTATAACCGATGGAATCATCCATTTCTGTACATAAAAAATGATCGATTTGAAAAGGCTTTACGAAAAGAAATG  
TCACAATATTTCTTTTCAGATCTACGAAAGCAATGGGAAACAAAGAATATCTTTTACATACTTGCCAGTTTAGCAACTTT  
TGGAGAAATGATAAAAAAGAAAGATATCTCTGTACACACTAGAAAAATCTTCTCTAATGAATTTGACAAAACGTTGGGTTT  
ACACGAATAAGCAAAAAATAAAGAATCTAAACAATGAGTTTAGAAATCGAATTCAGCCCTAGACAAGGAATTTCTTTTT  
CTGGATATACTCGAAGCAAGAACTAGATTGTGTAATGACGATACTAAAAATGAATATTTTCTAAAAATGTATGATCCGTTT  
CTTAAAAGGTGCATATCGCGGAAGAATCAAAAACAATACTTTACCTTCTAAAACTGCGATAGACAATTTAAGAGATACAA  
TTGGTATAAATCGAATTCATAGTATTCTTCTTCCAGATATTAATATTGATTATCAAGAATTTGAACAGAAAGCAAATCTG  
TTTGATAAAAAACAATTATTAACAGAAATGGGGAATTTTTTACCCTTAGCTGGTGAATTTGATATAGAACAACAAAATCGAA  
TTTAAATATGAAAGGTCTTTCTTTATTTTTCAGACCAAGACCAAGAAAAATAGATTTTGAAAAAGAAAGAAAAATTTTCA  
AATTTCTATTGAATGTTATTTCGAACCTATCCTATTGATCAAAAAATTCAAAAAGAATCTGTTGGAATAAAAGAAATATC  
AAAAAGTCCCTCGATGGTCATACAAATTAATCACCGATTTAGAACAACAATCAGGAGAGCATCAAGAAAACGTACCGGT  
TGATCATCAAATTCGCTCAAGAAAAGCCAAACGTGTAGTGATTTTTACTGATAACAAGGAGAATACCGATCCTAATAAGG  
ATAATGATACTTCGGATCAAAGAAACGAAGTGGCTTTGATACGCTATTTCGCAACAGTCGGATTTTCGAAGAAGAATAATT  
AAAGGTTCTATGCGCGCTCAAAGACGTAAAATTGTTATTTGGGAACTCTTCAAGCAAATGTGCATTCTCCCTTTTTTT  
GGACAGGATAAAAAATCTCCTCGTTTTTCTTTGATATATCCGTAATGATTAACTTCTTTTTAGAAATTTGGACAGGGA  
AGGGGGCCAAATTTGAAATTTGGAGTATACAGATGAAGAAACAAAAAGGAAGATAAAAAAGAAAGGATAAAAAAGAG  
GAGAACAAGAAAGGAACAAGCGCGGATAGAGATAGCAGAAGCCTGGGATACCATTCTTTTTGCACAAGTAATAAGAGG  
TTCCATGTTAATAAGTCAATCTTTTTTTAGAAAATATATTCTGTTTACCTGTATTAATAATAGGCAAAAAATTTGTACGTA  
TGATATTATTCCAATTTCCGGAATGGTCTGAGGATCTAGAGGGATGGAATAGAGAAATGCATATTAATGTACCTATAAT  
GGTGTTCATTTATCGGAACAGAATTTCCGAAAAATTTGGTTAACAGATGGTATTTCAGATAAAAAATCCTATTTCTTTCTG  
TCTGAAACCTTTGGCATAGATCGAAACGACGGCCCTCTCATAGAGATTTAATGAAAAAGAAAAACAACAAAAGATGATTTTT  
GTTTTTAAACAGTTTGGGAATGGAACTGAACCTCCGTTTTGGTTCTCCAGAAAAACAATCTTTTTTTTGGAGCCGCT  
GTTTAAAGGAGCTGGAAACAAAAATTATAAAATTCAAAAGGGCATATTTTCTAGCTCTAAAAGTTTTTAAAGGAAAAACAAA  
ATTACTTCTAAGAGTTTTCAAAGAAACAAAAAAATGGATTATCGAAAAGTTTTTTATTTCTAAAAAGACTAATAAAGAAC  
TTTCTAAATTAATCCAATTATATTATTTAGATTTCAGAGAAGTATATGAATCGAATGAAACTAAAAACGAAAAAGATTCC  
ATAATCAGCAATCAGATAATTCATGAATCCTTTAGTAAAATTAACCTCCTCAAATTTGGACAAATTTCTTCACTGACAGAAAA  
AAAAAGAAGGATATGTCTCATAGAACAAGTACAATCAGAAATCAAATAGAAAGAATTATAAAAGAAAAAATAA  
CCCCAACGCCAAGAATATATAAAGTCTTAATAAAAGAAATTTGGAATACTAAAAGATTAGAATTGCCAAAAACATTTGG  
CAAATATTAAGAAAGAAATGCCCCGATTATTTCTCAAATTCATTTTATAAAAAATTTCTGTTGAAAGAATATACAT  
AGATATATTTTTTATTTATCATTAAATATTACCAGACTGAATACACAACCTTTTTTATTGAATCAATAAAAAAATTTATGGATA  
AATCCATTAATAAAGCAAATAAAGAAAGGATTAATAAAAAAATCAAATACAATTTACTTTATTTTCGACTATAAAAAA  
TCAATTTGATACTATTAACAATAAGACAAATTCATATATTTTTTGTGATTTATCCTACTTGTCAACAAGCATATGATTTTTA  
CAAATTTACAAAACATAAAGTTAGTAACCTTGATAAAATTAAGATCTTTTTTTTCACTACCTCGGAACCTCTTTTTTTCTTA  
AAACTGAAATAAAGCATTCTGTTTGA AAAACAAGGAATAATTCAGAATGAATTAAGTCTTAAGAAACTTCCGAGTTATGGG  
ATGGATCAATGGAAAGGTTGGTTAAAAGGACATTATCAATACGATTTACCCTCGATTAGATGGTCTAAATTAATATCAGA  
AAAATGGAGAAATAGAGTTAATCAACATCATATGGCTCAAAATCAAATTTCAAATTTGAATTCATATGAAAAGGGCCATT  
ACAAAAACAAAAGGATTCTGAAGTATATTCAATTATTGAATCAAAAAGAGAATTTTCAAAAAACTCTAGATATGATCTT  
TTATCATATAAATATATTAATTTCAAAAAATGAGGGACCCATCTATTTATGAATCACCTTTCAAGTACAAGTAAATAA  
GAATCAAGATTTTTTATTATAATTTCTAACACATAAAACACAACCTTTTTGATATGTTGGAGAGTATCCCTATCAATCCTT  
ATCTAGTAAAAGGTAATATTAGATATATGGAAAAAATACCGATAGAAAAATTTTTGATTGGAAAAATCATCAAATTTTTT  
CTTAGAAAAAGGGTGCATATTGAATCCTGGGTCAAATCAATACTAAGAGTAATCAAATACTAAGATTGGTACTAACA  
TTATCAAATAATTGATAAAATTTGATAAAAAAGGCCCTTTTTATCTTCTGCTTCCGCAAAATCCCAAAATAAACTCGCCAA  
GTCCAAAAAACTTTTTTGGATTGGATGGGAATGAATGAAGAAATATTAATCGTCCCATCTCGAGTCTGGAATTTTGG  
TTCTTTCCAGAATTCGTACTCCTTTATAATCTATATAAAATGAAACCGTGGGTTATACCAAGCAAAGTACTTCTTTTCAA  
TTTGAATCTAAATGAAAATGTTATTAGTAAACAATAAAAAACGTGATGGAAAGCAAAGACGGAATGTGTTATACCATCGA  
ATAACAATAAAGAATAAAAAATCAGAATCAAAAAGAAAAAGAAACCCCTGCGGACCAAGAAGATCTTAGATCAGATGCA  
CAAAAACAGGGGAATCTTGATCCGTTCCCCCAACAAGACAAAGCAAGAAAAAGATAATGAAGAGGATTATGCAGTATC  
AAAGATAAAAGCGGGTAAAAAGAAAAAGCAATACAAAAGTAAAACGGAAGCAGAATGGATTTTTTCTAAAACGTTATT  
TAGTTTTTCAATTTGAGATGGGGCGATGCTTTGAATCAAAGAATGATCAATAATGTCAAATATATTGTCTCCTGCTTCGA  
CTGATAAATCCAAGAAAAATTACTATATCTTCGATTCAAAGAAGAGAAATGAGTTTGATATAATGCTGA

Cucumis GCATCTAGCATTGGGTAGACCTTATAACAATAACTGTCCTAGCTCTACCGTATCTTTTGTTCAT--  
----TTCTTCTGGACCAATCCCAAACACTTTTTTTAT-----TATGGATCTACTACC-----

AGAAACTCAATGCGTAATCTTAGCATTCAATGTGTATTCTGAATAATCTCATTTCATTTTCAATTATTCAACCATTTTCATTTT  
ACCAAGTTCAATGTTAGTCAGATTAGTCAACATTTCTATGTTTCGATGCAACAACAAGATGTTATTTGTAACAAGTAGTT  
TTGTTGGTTGGTTAATTGGTCACATTTTATTCATGAAATCGGTTGGATTGATATTAGTCTGGATACAGCAA---  
AATAAT-----TCT-----ATTATATCTAAGAAGTACATTAGATCTAAT-----  
----AAGTAC-----CTTGTGTGAGAATTGAGAAATTCTATA-----  
GCTCCAATCTTTAGTATTATCTTATTTATTACCTGGGTCTACTATTTAGGC-----AGAATACCGTCACCCATT-----  
-

CCACTGAAAGAAACCTCAAAAACCTCAGAAACGGCGGAAACGGAGGAAAGCGGAGGAAGAAACAGATGTAGAAATAGAAAC  
CACTTCCGAAACGAAGGGGACTAAACAGGAACAAGAGGGATCCACCGAAGAAGATACTTCTCCTTCCCTTTTTTTCGGAAG  
AAAAGGAGGATCCGGACAAAATCGATGAAACGGAAGAGATCCGAATAGATAAAAAAGAAAAATATCTCTTCGGGTTTGAA  
AAACCTCTTGGGATTATCTTTTTCGACTATAAACGATGGAATCGTCCATTTTCGATATATAAAGAATGATAAATTTGACAA  
TGCTGTTAGAAAAGAAATGTCACAATATTTTTTTTATACATGTCAAAGTGACGGAAGACCGAATAGTTTTTACATATC  
CACCTAGTGTAGCAACTTTTTTCGAACTGATAGAAAAAAGATATCTTTGTTTTCAACAGAAAAACTTTTTTATGATGAA  
TTCGATAATCCTTGGAAAGTCTTTGAATGAACAAAAAAGAATTTTAAACAAAATAGTTATAACTAGAATTCTACTTCT  
CGATAAGGGATCCCAACTCTAGTTGGAGATGTACTGCAAAAAAGGACTCAATTATGTATATGTAATGATGAAACTAAAA  
AAGAATATTTACCAAAAATATATGATCCGTTCTTGAGTGGTCTTACCGGAGACGAATCAATTTACTTTTAGGATTCTCA  
ATGCTAAATGAAACTTCTAGAAAAAATGATAGTGAGAACATTTGGACAAATAAGATTTCATGCTATCATTTCGTAATAATA  
CAACGGTTTTCTTCGATGGAGTTACAATTCCTTACAAGGCTAACGCAAGTGATCAAAACTCGATTGACCTAACAGAAATCA  
GTAAAAAAGTTCCTCGCTGGTCATACAAGTTAATCAAGGAGATAGAACAAGTGACGACATAACCGATGGAGAGCTCGTG  
TTAGATTATCAAAATTCGTTCAAGAAAATGCAACCGGTAGTAATTTTAAAGTGACCTTAACAAAATTAAGAAGATTTCTAC  
TTCTACTCCTACTTCTACTCCTACTTCTACTCCTACTTCTACTCCTACTTCTACTCCTACTTCTACTCCTACTTCTACTCCTACTT  
CTACTCCTACTTCTACTTCTACTTCTACTCCTGCTTCTATTCTGCTTCGACTTCGACTTCTATTCTGCTTCGACTTCG  
ACTTTCGACTTCAACTTCTATTCTGCTTCGACTTCGACTTCAACTTTTTATTCTGCTTCGACTTCAACTTCTATTCTGCT  
TTCGACTTCGACTTCGACTTCAACTTCAACTTCTATTCTGCTTCGACTTCGACTTCGACTAATGAGATTAAGTCAAGG  
ACGAACCAAGGACGAACCAATGGAACAGGCTATTATACGCTATGCCAAGCAATGGGATTTTCGTCGAGAGATAATCAAA  
GGCTCTATGCGTGTCAACGACGTAAAATGGGTATGTATCAACTGTTTTCAAGGTGCAAATTTCTTATCTTTTTCTTGGGCAG  
ACACAATTTTTTTTTTCTGATTTTTGTATTTATATTTCTAGACTAATGGAAAAACTTGATAGACTTCGGATACGGACAA  
ACACAGAATTGCCTATTTTGAATAATGGAGAAGAAAAAGACAAGGGAAGATCTGAAAAACGAAAAAATCAAGAATCGATA  
AATCTGAAGGAAGAAAAACATATACAAATAGCAGAACTCTGGGAGAGCATAACGATTTGGTCAACTAGTAAGAGGTTCTCT  
GTTAATAACTCAAGCATTTTTTGAGAAAATATATTATCTTACCCTCAGTGATAATAGCTGCCAACCTTACCCGTATACTAT  
TATTGTCACCTCCTCACTTTTTTGGAGATTTTAAAAATTGGAAAAAGAAATATATGTAAAGTGCACATATAATGCTATT  
CCATTAGCAGAAAACGAATTTCCCAAAAATGGTTAACAGACGGTATTCAAATAAAGATCTTATTTCTTTTTCTGCTGCA  
ATCGTGGCACAGATCAAAAAAGATAGAAAAAAGGATTTTTGTTTTTAAACAGTTTTTGGAACGGAAACTGAACAGCCTT  
TTGGGTCTGCCGAAAACCCATTCTTGTTTTTTAAATCCGACTTAATAGAGTTAAGAGAGTTCATAAAAAAAAAAAAAACAA  
CAATTAAAAAAATGGAGAACGAAGTATTTTGAATATTTTTACGTTTTAAGAAAAAGGTTTTTGAAAAAATTAATATTGC  
AAAAGAAAAATGGGTCAACACCATTTTATTTATAAAAAAAGACTAAGAGAATTTCTGGCAAAGAAACCCAATTCTAT  
TATTGCAATTTGAAAGAAATATACAAGTTGACTGAAGCTAAAAAAGAAAAAATCAATAATAAGTAATGGAATGATCCAA  
AGCTCGTCTGGGTCTATAGATTGATAATTTTGTTCATTGAGAGAACGAAAGATGAAAGAGTTGACTGATAGAATAAACAC  
CATGCTAAAAATAATTGAAAAAATGAAAAAAGACAGGCAAAAAGAGTTGCTAAATACAAAAATAAATATTAGTCCTAACA  
AAATGAGTTATTATGATAAAATATTTGAATCTCAGAAAAATATTTTAAAGATATTAAAAAAAGAAATGTACGATTTATT  
CGTAAATCGTATAAGTTTCTAAAATTTTTGTTCAAAAACATATACATAGATATCTTTCAAGGTATCATTAAATATGTCGAG  
GATTAATGGCCAAGATTCAAAAATTACAAAATCCTTTTTCAATAATGAAGCAAATCAAGAAAGAATTGATAAACCAAAATC  
AAAGTATAAATTTCAACTATCAAAAAGTTACTTTTCAATATTACTAATAAGAATGTAAAGAATCAGAATCTAAAGATG  
TTTTGGGACGTATCATACTTGTTCGCAAGCATATTTATTTTACAAATTTATCACAACAAAAATTTAACTTATCTAAGTT  
AAGACCTGTCTTTCAATATCACGGAACATCTCGTTTTCTTAAAGATGAAACACAGGATTTTTTGTGAAAGTTGTTGGAG  
CACACGAAATATTACATTCCGATCTAAAACAAAAGAAAACAAAAGAATCTTGAAAATTTCTGGAATGATAAATCCATGGAAA  
AACTGGTTACGGGGTCATTATAACTTCGATTTATATCCGATTAGATGGTCAAAATTACTCTCCAAAAATGGCGAAATAG  
AGTCAAGCAAGATCGTAAAAATAAAGATTTTAAACCAATGTGATTATCATATGAAAAAAGGATTAATTGATTACAAAAAC  
AAAATCCTTTTTGAAACACACTACTCATTACCGACTAAAAAATAAATAATATATATATGATTCTTTATCATATAAATCT  
ATTAATTATGAAGATAATAAAGATTCATATATTTATGAATTACCAGTACAAGTAAAAAATAATCAAGAAAGTTGTTATAA  
GTACAACAAGGATAAATGCAAATTTTTTGTATATACTGACTGATCTCCCTATCGATAAATATCTAGTGAAAAATAAATTATC  
CAGTGAAAGCTAATATTAGAGGTCTGGAAAAACTATGGATAGAAAATATTTTGTATTGGAGAATGCTGCATTTTTCTATT  
AAAAATAAGGGCGATATACGAGTCTGGAGACATAATGAGTCTGACACGAACAGTAAAAAATAACTCAAAATGGGGTTAA  
GAATTTTGAACATAATCAAAAAATAAATAAGAAAATAATTAGAAAAATAAAAAAGAAAGAATTGTTTTATCTCACAAATA

ATCAAGATAAAAAAAGCAACCCATCCAACAATAAAAAACAAATCTTTTTTGATTGGATGAGAATGAGTGAAAAAAAATA  
AGTCGTTACAGATCGAATTCGAACCCTAAGTGGTTCTTTCCAAAATTTTTGATACTTTATAATGCATATAAGATTAAGCC  
ATGGATGATACCAATCAAATCACTTCTTTTCGATTTGAATGAAAATGAAATTTTTAGTAAAAAAAACCTCATTGAAAAGA  
AAAATGGAAATAAAGCAAAAAAAGAATCTGTGGCCAAAGAGGGTGTGACTCAGTTCTCTCAAACCACACAAAAAATCTT  
CAAAAAGATTCTGCGGGAGCAGATGTGAAAAAAGGTATAAAGAAAAAGCAATCCAAGAAAAAGATCGAAGGGAAGCTTGG  
TGTACTCCGAACAGGCCATTTTCGTTTTCAATTGAACTGGCCTAATCCCGAAATAAGTAAAAGCCTTTTTCATGAACCTCA  
ACGGATTTTCTTTTCATGCTTAGACGGCTAGATCTCAAAAAACTTAGTCTAGCCGCTATTTCGCAATAACGAATTCAGTCTG  
GAGTTCCTGTACCTCCGTCGGACGATATAACTTTTCACGAGTTACTTGAAAAGGGAATATTTATTATCG  
Daucus GCATCTAGCATTGGGTAGACCTCATAACAATACTGTACTAGCTCTACCGTATCTTTTGTTTTCAT--  
----TTCTTCTGGAAAAATCACAAAACTTTTTTGAT-----TATGGATCTACTACC-----

AGAAATTC AATGCGTAATCTCAGCATTCAATGCGTATTCTGAATAATCTCATTTTTTCAATTATTCAACCATTTTCATTTT  
ACCAAGTTCAATGCTAGCCAGATTAGTCAACATTTATATGTTTCGATGCAACAACAAGATGTTATTTGTAACAAGCAGTT  
TTGTTGGTTGGTTAATTGGTACATTTTATTTCATGAAATGGGTTGGATTGGTATTAGTCTGGATACGGCAA---  
AATAAT-----TCT-----ATTAGATCGAATGTACTTATTTCGATCTAAT-----  
----AAG-----TCAGAATTGATAAATTATATG-----  
GCTCGAATATTTAGTATTCTCTTATTTATTACCTGTGTCTACTATTTAGGC-----AGAATACCGTCAACCCATT-----

TTTACTAAGAACTGAATCCACAAACGGAAGAAGGGTGGGAAAGTGAGGAAGAAACAGATGTAGAAATAGAAACAGCTTC  
CGAAACGAAGGGGACTAAACAGGAACAAGAGGGATCCACCGAAGAAGATCCTTCTCCTTCCCTTTTTTCGGAAGAAAAGG  
AGGATCCGGACAAAATCGATGAAACGGAAGAGATCCGAGTGAATGGAAAGGAAAAAACAAGGATGAATTCACCTTTACA  
GAGATACGCTATAACAATAGCCCAGTTTATAAAGGCCTCTTCTGGTTTGAAAAACCTCTTCTGACCTTTCTTTTCGATTA  
TAAACGATGGAATCGCCATTACGATACATAAAAAATAATAGATTTGAAAGGACTACAAGAAAAGAAATGTCACAATATT  
TTTTTTATACATGCCGAAGTGATGGAAAAGAAAAGAAATCTCTTTTACGTATCCGCCTAGCTTGTCAACTTTTGGAGAAATG  
ATACAAAGAAGGATGTCCCTGCCACACTAGAAAACTCTCTTCGGCTGAACTGTACAATCATTGGGTTTATACTAACCA  
ACACAAAAATAACAACCTTAAACAACGAGTTTTTAAATAGAATTGAGGCTCTAGATACGGGATTTTTTTCTCTAGATATAC  
TCGAAAAAAGTACTAGATTGTGTAATGATAAGACTAGAAAATATTACTTGCCTAAAATGTATGATCCCATTTTGAATGGG  
TTATATCGGGGAACAATCCAAAAAAAATTTACCTTCAATCATAAATAAAAATTTTCGTTAGAAAATTTTCATAGAGACAT  
GGAAATTAATAAAGATTCATAGTCTCCTTCTTCTGATACTGATTACCAAGAATTTGAACAGAAAATAGACCAATTTGATA  
AAAAAACTTTTTCAACGGAATAATCGTCATTTTACTTTAATCAGTAAATTTGGATAGAGAATCGGGATCGAGGAAGGGC  
CTCTCTTTATTTTCAGAAAAAAGAACAAGGAGGATTTGGTTCAAAAAAAGAGACAAAATTTTACAAAATTTTATTGAATAC  
AATTCTAACTAGCCCTAATGATCAAAAAACAAAAACAAAAATTTGTAATAAAAAGAAATCAGTAAAAAAGTCCCTAGATGGT  
CATACAACTTATTACCGAATTGGAATTCCTATCGGGCACAGCTCATGAAGGCCTACCATTAGATTATCAGATACGTTCA  
AGAAAAAGGGATGGTATAATAATTTATAGGCCTACTAAACGTAGTCGAAATGCAAGTATCAAAAAATTGGATGTCTTTTAG  
AGACTATTGAGAAGAATCAGATTTTCGTGCGAGAATTCATCAAAGGTTCTATGCGTGTTCAAAGGCGTAAAACCTGTTATTT  
GGAAATTTGTTTCAAGCAAATGCGCATTCCCTCTTTTTTTGGACAGAATAAAAAAATACCCACTTTTTTTCTTTTAAATATC  
CCTGAACGGATGAAATCTTTTTTTAGAAATTTGATGGGTAAGGATCAGGATTGAAAGATTATACGGAAGAACAAGAAGA  
CAAAATAAAGGAAAAAGCGTCGATAAAAAATCGCGGAAGCCTGGGATTTTCATTCCATATCCACAAGCAACAAGAAGTTTAA  
TTTTAATAATTC AATCAATTTTTTAGAAAATATATTTTATTACCTTCATTGATAATAGTTAAAAATATTGGGCGTATTTTA  
TTATCTCAACCCCCGAATGGACTGAGGACTTCGATGAGTGGAAATAGAGAAAAGCATATTATATGTACCTATAATGGTGT  
TCAAGTATCAGAATTCGAACCTCCCAAAAATTTGGTTTTAAAGATGGTATTCAGATAAAAAATAGTATTTCTTTTTTATTGA  
AACCTTGGCACAGATCCAAATTGAGGACCTCTTTTTCTTCTTATAAAGATCTAAAGAAAAGAAACAACCAAAAATTTTAT  
TTTTTAACGGCTTGGGGAGCGCAAACTACCCTTAACTTTGGTTCTATCCCTCCAAAACCTTCTTTTTTAAAGCCTATTTT  
AAAAGAATTTAAAAAAAATGCAAAAAACGAAAAACAACAATTTAAAAGTTCTAAGAGTTTTAAAAGAAAAGAACAAAAG  
ATTTTCTACAAGATTCAAAAGAACCAAAAGAGGTGATTATTTAAAACGTTTTATTTCTGTTTATAAAAAGAATAAAAAA  
GAACTCTTCAAAAATACATCCAACCTCGATTATTTATATTGAAAAAGGTGTATGAATCCGGCGAAACTAATAAAAAAAGA  
TTATATAATTTAGGAATCAGCAAATTCACGACTCGTTTTATAAAAAATTAATCTACAGATAATAAAAAATGATTCCTGAGAG  
ATAAAAAAATTAATAATCTGACTGATAGAACAAGCACGATAAGAACGAAAAACAAGGGTCTTATGAAAGAAAAAACAAGT  
AACGCCAAGAAAAGAGGTAGTCTTAACAAAAACAAGTTTTAATAGAAAAAATAAATCACCAAAATATTCTTTTTAAAAATCTT  
AAAAATAAAAAGAAAGCACTCGATTAATCTATAAATCTATTTGTTTATAACAATTTTCATTAAGAATATACATCG  
ATATCTTTGTATGTATTATTCATATTGCCAGAATTTCTACACAACCTCCTTCTTGAATCAATAAATTTTTGTTTTGATAAA  
TACATTTACATTTACAATAATAAAAACAATAAAAACAACCTACAATAATAAAAACAACCAAGAAATTAATAAAAAAAGA  
AATTAATTTTATTTGACTATAAAAAAGTGCATTTACAATATCCAAAATAGTAAGAGGAATTCACGTCTTTTTTTTGGACT  
TATCCTCTTTATCACAAGCATATGTATTTTACAAATATCACAAACCCCAATTTATTCTTTTTTATAAGTTAAGAGATATT  
TTTGAGTATAATGGAACCTTTTTTTTTCTTAAAGACTGCAATGAAAAATTTTTTTTTAACACAAGGAATATTTTCATTCCGA  
ATTAAGACATACTAACTTTCAAGTTATGAAACGAATCAATGGAAAAGCTGGTTAAGAGGTCAATTATCAATACAATTTAT  
CTCAGATTAGGTGGTCTGGATTAATACCAAAAAATGGCGAACTACAATAAATGAAGGTGGTATGACCCCAATAAAGAT

TTAACAAAATGCAATTCGTATGAAAAAGACCGATTACTTTATCACAAAAACAAAAGGATTTTAAAGTATATCCATTACC  
AAACCAAAAAGATAATTTTTCTAAAATACTATATATATGATCTTTTTTCATATAAATCTATTAATTCTGAAATTAAGAAAT  
CCTCATATATTTTTTTTTGGATCACCATCCGAATTA AAAACAACCAAAAAAATTGCTTTTAATTACAACAAGAAAAACAA  
AATTTATCTGAAAACCTGGAGGAAATTCCTATCAATCATTATCTAGAAACGGGTGATATTATGTATATGAAAAAATCC  
GGACAGAAAATATTTTGATTGGACAATTTTAAATTTTTTTATAAGACAAAAAATAGATATTGAGGCCTGGACCAAAATGG  
ATTATAACAGTAATATAAATACTAAGCTTGGAAATACGAATTACCATAAAATTTATAAAATGGATAAAAAACGCTATTTTA  
TCTCTGACGATTCATCAAGATTTAGAAAGAAATCCAATCAATGACAAGAAAATTTTTTTTGATTGGATGGAAATGAATGA  
AGAAATCCTAAACCAATATCGACAAAATCTGAAACTTACGTTCTTCCCAGAATTTGTGCCACTTTACAATGTATACAAAA  
CAAAACCATGGATTATAACCAAGCAAATTACTTCTTTTAAATTTAAATAAAAAAGAAAAACATCAATGAGAATAAAAAATTC  
CACTTTTTTAGACCATCGAATGAAAAATATATTATGAATTAATGAATCGAAATCAAGAAGAAAAAAAAAACCGCAGGCCG  
AAGAGGCCTTAGATCATATGCACAAAACCAAGATAAATGAAAAAAAAAATAAGATCCGGAATAAGATGAGACGAGAAAA  
TAATTTTCTTACGGAAACACTATTTGCTTTTTCAATGGATAATAGACGATGGTTTAAATCCGAAGTTAACTGAAAGAATG  
ATCAATAATATCAAGATATATTGTTACTTGCTTGGACTGAGAAATCCAAGAGATACTACTATATCGTCTATTCAAAGGAA  
AGAATTAATCTGGATATAATGGTGATTTCGACAAAAATGACTCCTATAGAATTGAATAAAAAGGGGATATTTTTTCTAG  
ATCCCACCCGTTTGTTCAGTAAAAACGACGGATACTTTATTATATATCAAACCGTAGGTATATCGTTGGTTCCATAAGAGT  
AAATACCAAACCTCCTCAAAGATATCGAGAACAAGATATATCAATAAAAAAATTGGATGAATCTATCC

Dioscorea

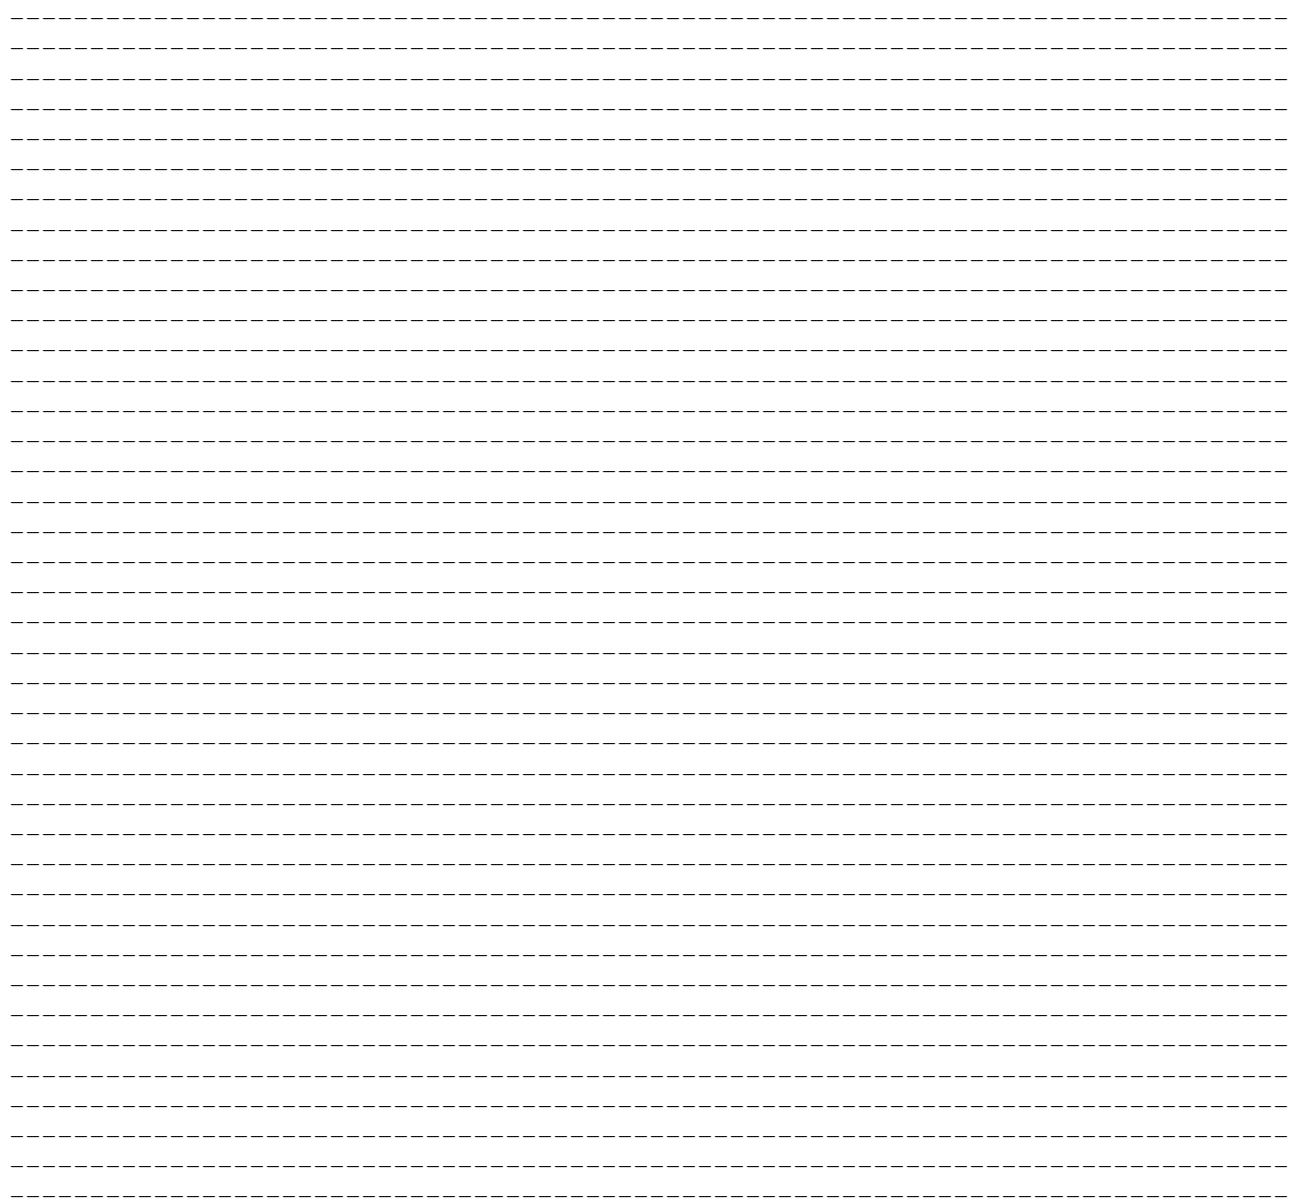



-----  
-----  
-----  
-----  
-----  
-----  
-----  
-----  
-----  
-----  
-----  
-----  
-----  
-----  
-----  
-----  
-----  
-----  
-----  
-----  
-----  
-----  
-----

Drimys GCATATAGCATTGGGTAGACCTCATACAATAACTGTCCTAGTTCTACCGTATCTTTTGTTTCAT--  
----TTCTTCTGGAACAATCACAACACTTTTTTGGAT-----TATGGATCTACTACC-----

AGAAATTC AATGCGTAATCTCAGCATTCAATGTGTATTCTGAATAATCTCATTTTTTCAATTATTCAACCATTTCATTTT  
ACCAAGTTCAACGTTAGCCAGATTAGTCAACATTTATATGTTTCGATGCAACAACAAGATGTTATTTGTAACAAGTAGTT  
TTATTGGTTGGTTAATTGGTCACATTTTATTTCATGAAATGGGTTGGATTGGTATTATTCTGGATACGGCAA---  
AAAAAT-----TCT-----ATTAGATCTAATGTACTTATTTCGATCGAAT-----  
----AAGTAC-----CTTGTGTCAGAATTGAGAAATTCATG-----  
GCTCGAATCTTTAGTATTCTCTTATTTATCATCTGTGTCTACTATTTAGGC-----AGAATACCGTCGCCTATT-----

-----  
GTCACTAAGAACTGAAAGAACTTCAGAAACGGAAGAAAGGGGGAAAGTGAGGAAGAAACAGATGTAGAAATAGAAAC  
AACTTCCGAAACGAAGGGGACTAAACAGGAACAAGAGGGATCCACCGAAGAAGACCCTTCTTTTTGTTTCGGAAGAAAAGG  
AGGATCCGGACAAACTAGATGAAACGGAAGAGATCCGAGTGAATGGAAAGGAAAAACTTAAAGATAAAGAGGAATTCCAT  
TTTTGGTTTTGAAAAAGCTTTATCGACTCAACTTTTTCGAAAAAAAAGATGGAATCGTCCATTGCGCTATATAAAAAACGA  
TCGCTTGGAAAATTCTGTACGAACAGAAATGTCACAATATTTTTTTTTCCACTACTTGTACATGTGGAAAAAAAATAATAT  
CTTTTACATTTCCGCCTAGTTTGTGCGACTTTTTGGAAAATGATACAAAGAAATATTTCTTTGTGCACGACAGAAAAACTA  
TCCCCCAAAGATCTGTATAATCATTGGGTTTATACTAATGAACAAAAAGGCACAACCTTGAGCAATGAGTTTCAGAAATCG  
AATGGAAGCTCTAGACAAGGGATCCCTTGGCTCTAGATGACTCGAAAAAAGGATAAGATTTTGCAATGATGAGAATGAAC  
AAGAATGCTTGCCTAAAGTGTATGATCCTTTTTTTGAACGGACCATATCGTGGAAACAATAAAAAAAGGATATTCACGTCCA  
ATCATGGATGATTCAATCATTTCGACAGAGGATTCCACAGGAATGGTTTGGATAAATAGGATTTCATGGTATCCTCCCCAA  
TCTTTCTGATTACCAAGAATTTGAAGATAAAAATGGATGCATTTAATGAAGAATTAGTATCGCCAGACATCGATCATTCT  
TGAACTCAATCAGTGAATTAGCTGAAGAATCAAGACCTAGTTTGAATTTGAAAGGACTTACTTTTATTGGCCGAACAAAGA  
AGACTTGATTTCAGAAAATCAAATGAAACGTTTAAAATTTCTATTCTATGCAGTTAAAACTGATCCAAACGATCAAACATAT  
TAGAAATAAATCCATTGGAATAGAGGAAATAGGCAAAAAGGTTCCCTCGATGGTTCATATAAATTTGACCAGGATTTGGAAG  
AACAAGAGGCGGAAAATGAGGAAGGATCGACAGAGGATCCTGGTATTTCGTTCAAGAAAAGCCAAACGTTGTGGTAATTTAT  
ACTTATAACGATCAGAATATCAATACTCATACTAGTACTAATACTAATAAGTGTAGTATGATCAAGCGGAAGAGGTGGCTTT  
GATACGTTACTCACAACAATCGGATTTTCGTGCGAATCTAATCAAAGGATCCATGCGCGCTCAAAGACGTAAAACAGTGA  
CTTGGGAAATGTTTCAAGCAAATGTGCATTCCCCACTTTTTTTGGACAGAATAGACAAAACATTTTTTTTTTCTTTTGAT  
ATCTCCGGAATGATGAATCCATTTTTGAGGAATTGGATGGGGAAGGATCCACAATTCAAAACCTTCAGATTCTGAGGAGGA  
AGAGGCAAAAAGAAAAAATAAAAAAAGAAAGAGCAAAAAGGAGGAGAATGAACGGATAGCAATATCAGAAAACCTGGGATA  
CTATTATATTTGCTCAAGCAATAAGAGGTTCTATGTTAGTAACCCAATCGATTTTTAGAAAATACATCATATTGCCTTCA  
TTGATAATAGCTAAAAATCTTGGTTCGTATGTTATTATTTCAATTTCCCGAGTGGTACGAGGATTTGAAGGAGTGGAAATA  
AGAAATGCATGTTAAATGCACCTATAATGGTGTTCATTATCAGAAACAGAATTTCTAAAACCTGGTTAACAGACGGGA  
TTCAGATAAAGATCTTATTTCCCTTTCTGTCTGAAACCTTGGCGGGGATCTAAACTACAATTTTTCATCAGAGATCCAATG  
AAAAACAAAGTAAAAAAGAAAATTTTTGTTTTTAAACGGTCTGGGGAATGAAACTGAATTACCTTTTGGTTCTCCACG

AAAAGAACCTTCCTTTTTTGAACCCATTTTTTAAAGAACTCGAAAAAAAAAATGAGAAAAGTTCAAAAAAAAATTTTTTCGAG  
TTTTAAAATTTTTTAAAGAAAGAACAAAATGGTGTCTAAAGGTCTCAAAGAAAAAATAAGATGGGTTATCAAATAGTT  
CTATTTATAAAAAGAATAATGAAAGAACTTGCAAAAGTGAACCTCAATTTTTATTATTTGGATTGAGGAAAGGCTATCAACC  
GAGTGAAACTGGAAAAGATTCCATAATCAGTAATAAGATTACTCACGAATCGACTATTCAAATTAGACCCATGGGTTGGA  
CAAATTATTCACTGACAGAAAAAAAAAATGAAAGATCTGGCTGATAGTACAACCACAATCAAATAGAAAAGAAATC  
AAAAAGACAAGAAAAAAAAATTTTTTAACTACAGATATAAATATTATTCCTAACAGACAAGTTTTTGATGATGAAAGATC  
GGAATCACAGAAACATATTTGGCAGAGATCAAAAAAAAAAGAAGTGCCCGATTAATACGTAAATCGCAATATTTTTATAAAAT  
ATTTCAATTGAAATAATATACATGGATATCTTTCTATGTACCATTAATATTCCAAGGATCAATGCACAACCTTTTCCTTGAA  
TCAACAAAAATCTTATCGATAAATATATTTACAATAATGAAACAAAATACAAATAAAGAAGGAATTGATGAAACAAATCA  
AAATAAAATTCAGTTTATTTTCGACTATCCAAAAGTCACTTTCTATTTTGAATATTCGAAATAATAATTCACATATTTATT  
GTGACTTATCTTTCTTGTCCCAAGCATATGTATTTTACAATAATCACAAAACCAAGAAGTTATTAACAAGTATTCACTTG  
ATATCTGTACTTCAATATCATGGCGCATCTCCTTTTATTAAGCATAGAATAAAGGACTGTACACGAGGAATTTTTGATTC  
CAAATCAAGACATAAAGAACTTCCGAATTCAGAATGAATGAATGGAAAACTGGTTAAAGCGTCATTATCAATACAATT  
TATCTCAGAATAGATGGTCTAGATTAGTATCGAAAAAATGGCGAACTAGAGTAAATCAGCGTCGTACGATTCAAATAAA  
GACTCAAATAATTTGGATTATATGAAAAAGAAAAAGACCAATTCATTTCATTACGAGAAAAGAAAATGATTGCGCAGTGAA  
TTCATTGCCGAGTCAAAGAAAAATTTAAAAAACACTACAGATATGATCTTTTATCATATAAATATATTAATTATGAGG  
ATAGGAAGAGCTCATATATTTATGTATCCCCGTTACAAATAAACGGGGGCCGAGAGATTCCCTATAATGACAACACACCT  
AAACCCGAATCATGTTATGTACTGGGGGATATAGCTATTAGTGATTATCTAGGAGAAGAGTCTATTATGGATACAGGTAA  
AAATCCGGATATAAAATATTTAAGTGGAGAATTCTCCATTTTTTTCTTAGAAAAAATATCGATATTGATACCTGGACCG  
ATATGGATACTGGGACCAATATTAATAAAAAATACTAAGAATGGGATTAATGATTATGAAAAAATTGATAAGAAGGATCTT  
TTTTATTTACAGATTATCAAGAAATCAAACCACCCAATAAAAAAAAAAACTTTTTTGATTGGATGGGAATGAATGAAGA  
AATGCGATATCGTCCCATATCGAATCTGGAATCTTGGTCTTCCCAGAATTTGTGCGACTTTATGATACATATAAAATGA  
AACCATGGATCATACCAATCAAATTAATCTTTTTAAATTTTCATGGAAATGAAAACATTAGTGAAAATAAAAAACATTAGT  
GAAAATGAAAACATCAACGGAAATCAAAAAAAAAAGATCTTCGTATATCATCTAATCAAAAAAGAATATCTTGAATTAGAGAA  
CCGAAATAAAGAAAAAGAAGCCGGGCAAGGGGATATTAGATCAGATGCACGAAACCAAGAGAATCTTGAATCAGATG  
CACAAAACAAAAAAAATATGTTGAAAAGGATTACGCGGAATCAGACATTAAAAAAGGAGAAAAGAAAAGAAAATACAAG  
AGCAACAAAGAAGCAGAAGTAGAGTTCTTCTGAAAAGATATTTGCTTTTTCAATTGAGATGGGACGATTCTTTGAATCA  
AAGAATGATCAATAATATCAAGGTATATTTGTCTCTGCTTAGACTGATAAATCCAAGGGAAATGCTATATCTCTCTATT  
AAAGAGGAGAAATGCGCCTAGATGTAATGTTGATTATCAAGGATCTGACTCTTACGGAATTGATAAAAAGGGGAATATTT  
ATTATTGAACCGGCTCGTCTGTCTATAAAAACGGGATGGACAATTTATTATGTATCAAACCATAGGTATTT

Eucalyptus GCATCTAGCATTGGGTAGACCTCATACAATAACTGTCCTAGCTCTACCGTATCTTTTGTTTCAT--  
----TTCTTCTGGAACAATCACAAACACTTTTTTGAT-----TATGGATCTACTACC-----  
-----

AGAAATTCATGCGTAATCTTAGCATTCAATGTGTATTCTGAATAATCTCATTTTTTCAATTATTCAACCATTTTCATTTT  
ACCAAGTTCAATGTTAGCCAGATTAGTCAACATTTATATGTTTTCGATGCAACAACAAGATGTTATTTGTAACAAGTAGTT  
TTGTTGGTTGGTTAATTGGTACATTTTTTTTTCATGAAATGGGTTGAATTGGTATTAGTCTGGATACAGCAA---  
AATAAT-----TCT-----ATTCGATCGAATGTACTTATTTCGATCGAAT-----  
----AAGTAC-----CTTGTGTCAGAATTGAGAAATTCATG-----  
GCTCGAATCTTTAGTATTCTTATTTATTACCTGTGTTTACTATTTAGGC-----AGAATACCGTCACCCATT-----  
-

GTTACTAAAAAATTCAAAGAAACCTCAGAAACCGGAAGAAAGGGGGGAAGGCGAGGAAGAAACAGATGTAGAAATAGAAAC  
AACTTTTCGAAACGAAGGGGACTAGACAGGAACAAGAGGGATCCACCGAAGAAGATCCTTCTCTTTTTTTCGGAAGAAAAGG  
AGGATCCGGACAAAATCGATGAAAGGGAAGAGATCCGAGTGAATGAAAAGGAAAAACAAGGGATGAATTCAACTTTCAA  
GAGACATTCTATAAAGATAGCCAAGTTTATAAACTTCTTATATGGATAGGAATAAAAAATAAAGAGAATTTCGAAGTTAGA  
AATATTTAAATGAAAGAAGATCCATTTTTTTTATGGTTTTGAAAAACCTCTTGTGACTCTTCTTTTCGACTATAAACGAT  
GGAATCGACCATTACGATATATAAAAAACAATCACTTTGAAAATGCCGTAAGAAATGAAGTGTCACAATATTTTTTTTAT  
ATATGTCGAAACAATGGAAGAAAGAATAATCTTTTACGTATCCCCCAGTTTTGTCACTTTCTTGAAAATGATAGAAAG  
AAAAATTTCTTTGTTGACAAAAGAAAAACTACCCTCTGATGAATTGTATGATCATTGGATTTTATACCAATGACCAAAAA  
AGAACAATTTGAGCAAAAAATTTGAAATCAAATGAAACTGTAAATAAAGAATCCATTACTCTAGATGTATTGAAAAA  
AGAAGTAGATTGTGTAATGATGAAAATAAAAAAATACTTGCCGAAAATATATGATCCCTTTTTGAAATGGGCCCGGTCG  
TGGAAGGGTGAAATTTTTTTTTTTCATCCCAAATCCTAAATAAAATGTCCATAAAAAATTACATCGAGACAGGTTGGATAA  
ATAAGATTCATAGTATACTTTTTACTACTGATCAGGAAAAATTTGGAAGAAAAAATAGATACATTTGATAAAAAATTCATTA  
TCAACAGAAAAAACTTTCTTTATTTCCATTTCCAGAAACCGAACAAGGAAGAATTCATTTCAGAAGATCAAATAAAAAAT  
TTTGAAAATTTTCTTCAACGCAGTTATAACTGAGCCCAAGACTAAAAGAATAAAAAAAAATCTATTGGAATAAAAGAAA  
TAAGTACAAAAGTTCTTTCATGGTCATACAATAATCAACGATTTGGAACAACAGGAAGGAGAAAACGAAGAAATGGTG  
GCAGAGGATCATGAGATTGTTCCAGAAAAACCAAGCATGTACTAATTTTTTACTGATAACGATGAAAATACTGATGCTAA  
TAGCAAAAAATACTAATAATCTTGATGAAGCCGATGAAGTGACTTTTCATACGTTATTACAACAATCAGATTTTCGTCGAG





AAACGATGGAATCGTCCATTTTCGATATATAAAAAATAATCGATTTGAAAATGTCGTAAAAAATGAAATTTTCAGAATTTTT  
TTTTCATACATGTCAAAGTGATGGAAAAGAAAGAATATCTTTTATGTATCCACCAAATTTATCAACTTTTCATAAAATGA  
TGGAAACCAAATTTTATCTCTTCACAAAAGATAAAAATTTCTATGATGAATTGTCTAATTATTGGAGCTATACTAATGAA  
GAAAAAGAAACAAATTTGAGCAATGAATTTGTAAATAGGGCAAAAAGTAATGGATAAGGAATTAATTTCTCTGGATATATT  
AGAAAACCGAATTCGATTGTCTAATGATGAAACTAAAACAAAATATTTAACTAAAATATATGATCCTTTCTGAACGGAC  
GCTTTTCGTGGACAAATCGAAAATGTTTTTTCAACCTCAATCCAATATGAAAAAATGAAAAAATAACCATTTTGATA  
AATAAAATTCATGGTATCCTTATTTCTAATAATACTTATAAAAAAATAATAGTAATTATCCAGAATTAGAGAAAAAAT  
AAATATATTTGATAGAAAATCTTTAGTAACTACATTTTTTTTTTTTCAATCTAATCAGTAAATTTTCAAAAAATTAGTAT  
CAAGCTTGAGTTTTGAAACACTTTCTTTATTTCCAGAACATGAACAAGTAAAAATAAATTATGAAGAAGAAAAAACA  
ATAATAAAAAATATTATTTGATGCAATTAGAACTGATTTGAACGAAAAACAATAGTAAATGGAAATAGAACAAGTGTAT  
TAGAATAAACGAAATCCGTAAAAAAGTTCTCTGATGGTCATACAAAATTTATTGACGAATTGGAACAACCTGGAGGAAAA  
ATGAAGCAGAAATTAATCAAAATTCGTTCTAGAAAAGCCAAACGTGTAGTAATTTTGACTAATAAATCTAAATTTTTTAAG  
AAGTACGATACTTATAATCCTACAGGAGATACTGATAACGCTGAAAAAATAAATGAATTTGGCTTTAATACGTTATTC  
CCAACAATCGGATTTTCGGCGAGACATAATCAAAGGATCTATACGTGCTCAAAGGCGTAAAACAGTTACTTGGAAATTT  
TTCAAAAAAGGGTGCATTCCCCCTTTTTTTGGATAAAATTTGAAAACCTTTATTCTTTTCTTTTGATAGTTTCAAATCA  
ATGAAAATATTTTTTATGTTCAAATTTGGATGCGAAAAAGGAAGAATTTGAAATTTCTAGTTATACAGAGGAAAGGGC  
AAAAGAAAGTTGAAAAAAGAGGAGGAAAAAAGGAAAATGAGGAAAGAAAACGTATAGAAATAGCAGAAGCCTGGG  
ATAGCATTATATTTGCTCAAGTAATAAGAGGTATTTTATTAATAACCCAATCCATTCTTAGAAAATATATTCTATTACCT  
TCATTGATAATAACTAAAAATATTGCTCGTATACTATTTTTTCAATTTCCCGAATGGTCGGAAGATTTTAGGGATTGGAA  
GAGAGAAATGTATATTAATGCACATATAATGGTGTTCATTTATCCGAAAGAGAATTTCCAAAAAATGGCTAACAGATG  
GTATTCAGATAAAGATCTTATTTCTTTTCGTCTCAAACCTTGGCACAATCTAAGCTACGATCCAATGAAAAGAAAAAG  
GATCTAATGAAAAAAGAAGCTTTTGTCTTAAACAGTTTGGGGGATGGAAGTCGACTTGCCTTTTCTGGTTCTCCCA  
AAAAATAGATTTTCATCATTTTTTGACCCCATTTTTAAAGAACTAAAAAATAAAGCAAAATTTCAATTTTTCACTT  
TTCGAGTTCTAAAAGTTTTAAGTGAAAAATTTGAAATTTGTTTCTAACTATCTTAATAGAAAAAGCAAAAAGGATTAGCAA  
AGTATTATCGAAAGTATTCTTAAAAGTATTCTCAAAAAGTATTCTAAGCCTAACGAAAATAAAACAATTTTTCAAATTTGCT  
ATTTATTAATTTAAATTTCAAAAAGATAGATGAATTGAGCGAAAATAAAAAAGATTCAACAATTTATAAGAATAATCCAA  
TGATTTCTGAAACAACCATTTCAATTCATCGATAAATTCAGTAAATTTGTTTATTGAAAAAATAAAGGATCTT  
AATGCTAAAAAGAAAGCAGTTATAAAAAAATGAAAAAATTAAGAAAGGGCTTGTAAATTTGAGAGCAAAATATTCAATC  
AAACAAAACAACCTTATGATAGTAAAAGGGTAGAATTCGAAAAAATAAATTTGAGATATTACAAAGAAGAATAATGCTC  
GATTAACCTGTAATCACATTTCTTTTTTAAATTTTTCATGAAAAGGATATACAGAGATATATTTCTATATATCAGTTGT  
ATTCGAGGATCAATATACAACCTTTTTCTTGAATTAACAAAAAATTTTTAAATAAATCCATTTACGATAATGAAGCAAA  
TGCAGAAAGAATTTATAAAACAAATCAAAGTATAATTCGCTTTATTTCAATTTTACACAAATATTTTCTACTAGAAATC  
CGAATTCACATAATTCTTGTGACATCTCCTTTTTGTGACATATGATTTTTTAAATTTATTACACACCCGAATTATT  
AACATAAACATCTATAAGTTAAGATCTGTTTTTCAATATCATGGAATTTTTTTTTTCTGAAAAATGAAATAAAGGATTC  
TTTTTTTGGAGCACAAGGAATATTTTATTATAAATTAACATAATAACCCTCTCAATTTCTGTAAGAAATCAATGGACAA  
ATTGGTTAAAGGATCATTATTATCAATATGACTTATCTAAAAGTAGATGGTCCAGATTAGTACCACAAAAATGGAGAAAT  
AGAATAACTGAATATCGTATAGCTCAAAAATAAGATTTAACCAAATGCAATTCATATGAAAAAGCCAATTAATTTCTTTA  
CAAAGAACAACAAGTAAACGCATTAAAAAAATAAATAGAAAACAATATAGATACGATCTTTTATCTATAATTTTATCA  
ATTATGCAGATAAGAAAGACTCATATATTTATGGATATAGATCCCTATTTCAAGTAAAAAATAAAGGATTTCTTCT  
AATTACAACACGTATAAAAAAGAATTTTGGATATCATAGATAATCTCTTTATCAAGAATTATATATCGGAAGATGCGAT  
TCTAGATATGGAAAAAATCTGTATAGAAAGTATTTTGATTGGATGGGAATCAATAGAGAAATACTAAATCGTTCCATAT  
CGAATCCAGAATTTTGGTTCTTTTCAAATTTGTGATATTTTATGACGCATATAGGGGTAACCTCGCAGGTTATACCAATT  
AAATTACTTTTTTTTTCTTCTAATGTAATCAAATGTTAGTAAAAATAAAGAACATTACTAGAAAAGAAAAAATGA  
ATCTCTTGAATTGGAGTTAGAGACTCGAAATCGGGCAAAAGCAGAATACCCTGATCAACGAAATCTTGAATCATCTATCT  
CAAACCAAGAAAAAGATATTGAAAACGATTATGTAGGATCAGACAGTGAAAAGAATAGTAAGGGTATAAAGAAAAAGAAA  
GACAAGAACAAGATGGAGGCAGAACTTAATTTCTTACTAAGAAATTTTTTGATTTTACATTTAAATTTGGAATAATTTCTT  
AGGTCAAAGAATATTTAACAATGTCAAAGTATATTTGTCTCTGATTAGATTAATAAATTTAAGAGAAATTTACAATAGCCT  
CTATTCAAAAGAGGAGAATAGGTCTAGATATTATGATGATTTCAAATCAGAAGAATTTAATTTCTTAGGCTTAAGGAAA  
AAGAAAAATAACAATTTTATGAAAAAAGAAATATTTGTTATCGAACAGTTTCGCTGTCTAGAAAAACAATAAACAATTT  
TTTTATGTATCAAACCATAGGTCTTTTCAATTAATTCAAAAGAATAAACGCAAAATTTATCACAATACCCAGAAAAATTC  
ATGTTAATAAGAAAAATTTTTATAAATATATTACAAGAACAAGAGATCAAAAAATAACGAAAAAATAAAGATAAT  
TCTGATTTACTTGTCTGAAAACATTTTTATCCGCTAGACGTCGTAGAGAATTGAGAATTCTAATTTGTT

Gossypium GCATTTAGCATTGGGTAAACCTCATAACAATAACTGTCTTAGCTCTACCGTATCTTTTTGTTTCAT--  
----TTCTTCTGGAACAATCACAAAGACTTTTTTTGAT-----CATAGACGTCCTACC-----

AGAAATTCATGCGTAATCTTAGCATTCAATGTGTATTCTGAATAATCTCATTATTCAATTTCAACCATTTTCATTTT  
ACCAAGTTCAATGTTAGCCAGATTAGTCAACATCTATATGTTTCGATGCAACAACAATATGTTATTTGTAACAAGTAGTT

TTGTTGGTTGGTTAATTGGTCATATTTTATTGATGAAATGGGTTGGGTTGGTATTAGTCTGGATAACAACAA---  
AATAAT-----TTA-----ATTAGGTCTAATGTACTTATTCGATCTAAT-----  
----AAGTAT-----CTTGTATCAGAATTTAGAAATTCATG-----  
GCTCGAATCTTTAGTATTCTGTTATTTATTACCTGTGTTTACTATTTAGGC-----AGAATACCGTCACCCATT-----  
-CTAACTAAGAAACTGAAAGGAATTTCCGAACCGGAA---GAAGTGGGGGAAAGTGAGGAA-----  
-----GAAAGAAACATAGAAATAGAACTATTTCCGAGGGGGGAGGGGCTAACCGAAACAGGGG-----  
ACCGAAGAAAATACT-----TCTTCTTCCCTTTTT---TCGGAGGAAGAGGTGGATCCGAGCAA---  
GAAACAGAAAAGCTACGAGTGACTGGAAAGAAAAAAAAAAAAAAAAATAAGGGCGAATTCACCTTTCGTTTTAAAGAGACATA  
CTATAAAAATAGA-----CCGGTTTATGAA-----  
ACTTCTTATCTGGAT-----GGAATCAAGAAAGTTCGAAGTTAGAAATATTA---AAA-----  
-----  
AAAAAGAAGATAAATATTTTATTATGGATTGAAAAACCTCTTGTGACACTTCTTTTTGATTCTAAACGATGGAATCGACC  
TTTGCGATATATAAAAAATGAC-----CGGGTTGAA---AATGCTATAAAA-----  
AATGAAATGTCACAATATTTTTTTTTTATACATGTCAAAGTGATGGAAAAGAAAAATATCTTTTACGTATCCACCCAGTTT  
AGCAACTTTTGGGGAAATGATACAAAAAAA---ATATATTTT---TTCACACCAGAAAAATGGTTTTCTGATGAA---  
TTGTATACTGATTGGAGTTTTATCAATGAACTAAAAAGAAGA-----  
AATTTGAGTAAGGAGTTTATAAAAAGAGTCGAATCTTTAGATAAGGAATCTTTTGATCTGGGCATACTTGAAAAAAGGAC  
TCGATTCTCTAATAATGAACTAAACGAGAA-----  
TACTTGCCTAAACTATATGATCCTTTCTTGCATGGACCCTACCGCGGAAGAATCAAAAAATGGGGTCCCTTTAAGCAT  
AAATCAA-----ACTTAT---AAAAAAAAAACACGGATCCATTTTGATAAATAAGATTCAT---  
GCTCTACTTCTTACTACTGAT-----  
TATCACGACCTTGAACAGACACTAGATACACTCAATATAAAATCATTAGCAACAGAA-----  
-----AAAGAACTCTCTTTATTGACA-----  
TTGACAGAAGATGAACAGGGAAATATCGATTCCGAGGATCGAGTCAAAATTTTGAAA-----  
-----TTTTTATTCAATATAGTTATAACTAATCCCAACAATCAA-----ACAATTAGAAAA-----  
AAATCTATTGGAATAAAAGAAATAAGTAAAAAAGTTTCCCTCGATGGTCATACAAATTAATCGACGATTTA-----  
GAACAACAGGAGGGGAGAAAACGAGGAAAAT-----  
GTAACAGCAGAGCATGAAATTCGTTCAAGAAAATCCAAGCGCGTCTGATTTTTACTAATAACCAGGCAAACGCCGATAC  
TTATACTAATAACCAAGGATGCTAAT-----GATCCT-----  
-----  
-----GATCAAACAGACGAA-----  
GTGGCTTTGATACGCTATTCGCAACAATCGGATTTTCGGCGCGACATAATAAAGGGTTCCATGCGTGCCCAAAGGCGTAA  
AACAATTACTTGGGAGCTGTTTCAAGCAAATGTACATTCCCCCTTTTTTTGGACAGA---GTAGAC---  
AAACCACTCTTTTTT---TCTTTT---GATATTTCTGGACCGCTGAAA-----CGAATATCTCGAAATTGGATATGT--  
-AAAAACAAAGAATCAAAAATTTCTGATTATACAGAAAAAAGATCGAGAAAAAAGACGAGGCC-----  
-----AAAAGAGAAAAATACAAAAGA-----  
GAAGAGAAAATGAGGATAGAAATAGCAGAAGCTTGGGATAGTCTTTTACTTGCTCAAGTAATAAGGGGCTCCGTGTTAAT  
AACCAATCAATTCCTTAGAAAATATATTATATTACCTTCACTGATAATAGTTAAAAACATTGCCCGTATGTTATTATTTCT  
AATTTCTGAGTGGTCTGAGGATTTAACGGATTGGAATCGAGAAATGCATGTTAAATGCACTTATAATGGTGTTCATTA  
TCCGAAACCGAATTT---  
CCAAAAACTGGTTAACAGACGGTATTCAGATAAAGATCCTATTTCTTTTTGCCTGAAACCTTGGCACAGATTTAACT  
ACAACCCTCTCAT-----AAAGATCCAATGAAAAAAGAAAGGTCAA---  
AGAATGATTTTTGC---TTTTTAACAGTTTGGGGAATGGAACTGAACTACCTTTC---  
GGCTCTCCTCGAAAACGGCGTTTCGTTTTTTGAGCCTATTTTTAAAGAACTAAAAAAAAAAAAA---  
TGAAAACGAAATGTTTTATAGCTTTAACAATTTTAAAGAAAAAACTAAATTGTTTCGA-----  
AAAGCTTCAAAAGAAACAAAAAATGGATCACTCAAAGCATTCTA-----TTTCTAAAAGGAATAATAAAA--  
-GAACTTCAAAAATAAAT-----CCAATTCATTTTTTGGGTTGAGAGAA-----  
CCATATGAATTGGGCGAAACTAAAAAG---GAT-----TCG-----ATAATCAGT---AATAAG-----  
-ATGATTCACAAATCATCCCTTCAA-----ATTCAATCTATGGCGTGGACAAATTAT-----  
TCATTAACCGAAAAAATAAAA---  
GATCTGACTAAGAGAACAACACAATCAAAAATCAAAATACAAAAAATTCTAATTATAAAGACAAGAAAAACGAATTTCT  
AACTCAAGAA-----  
ATAAATAGTAGTTCTAACAAAATAAGTTATCAGGATAAAAATATTAGAATCATCAAAAAAATTTTGGCAAATAGTA---  
AAAAGAAGAAATATTCGATTAATCCGAAATTCATTTTTTTTATAAATTTTTTC-----  
ATTGAAAAGATATACATGGATATTTCTTATATATCATTAAAT-----  
ATTCCAAGAACCAATACCCAATTTTTCTTGAATCA---ACAAA-----

AAAATGATTGAGAACTTCATTCAACAAT-----  
AATGAAGCAAATCAAGAAAGAATTAATAAAAACAACATAAACTCATTATTTTCAACTATAAAAACC---  
TCACTTTCTTCACTTTCTAATATTAGTATTAGAAATAAAAATGAAAA---GCTTTTTGT---  
GACTTATCCTCCCTCTCACAAGCATATGTATTTTACAAATTATCACAAACCCAAGTTATTAGTTTT-----  
TATAAATTCAAACCTATCCTTCAATATCATGGA-----ACATCTCTTTTTCTTAAAAATGAAATAAAAGATTATTTT--  
-----  
GAAGAACGGGGAGTATCTCATTCCAGATTAAGACATCATTATGGGTAAAGACAGAAAATTGTTTGGCATTCTGGAATGAA  
T-----GAATGGAAAACTGGTTAAGG-----AGTCGT---TAT---CAATAC---  
GATTTAGTTTCAAGATAGATGGCTAAAATTAGGACCAGGACAATGGCGAAATAGAGTCAATCAACACTATCTGGCTCAAAA  
TAAACATTTAACAAAA-----TGGGATTCAGATGAA-----AAAGAAAGATTAATTCATTACGAAAAAAAAAAT----  
--GATTTTCAAGCGAACTCATTACTAACT---  
CAAGAATATAAACTGAATCAAGAACAAAAATATAAAAAATCTAATTTTTAAAAAACACTATGGATATGATTTTTTTATCATA  
TAAATCTATTAAT-----TATCAAGATAAGAGGGACCCGTATGCT-----TATGGATCACCATTCCAAGTAAATAAG-  
---  
Helianthus GCATCTAGCACTGGGTAGACCTCATAACAATACTGTCCTAGCTCTACCGTATCTTTTTGTTTCAT--  
----TTCTTCTGCAATAGTAAGAAAACTTCTTGGAT-----TATGGATCTACTACC-----  
-----  
AGAAATTC AATGCGTAATCTCAGCATTCAATGTGTATTCTGAATAATCTCATTTTTTCAATTATTGAATCATTTCATTTT  
ACCAAGTTCAATGTTAGCGAGATTAGTCAACATTTTTATGTTTCGATGCAACAGCAAGATGCTATTTGTAACAAGTAGTT  
TTGTTGGTTGGATAATTGGTCACATTTTATTTCATGAAATGGGTTGGATTGCTATTAGTTTGGATACGGCAA---  
AATCGA-----TCT-----ATTCGG-----GTACTTATTCAAGCTAAT-----  
----AAATAC-----  
CTTGTGTTAGAATTGAAAAATTCTATGTCTATGGCTGGTATCTTTAGTATTTTTCTTATTAGTTACCTGTGTCCACTATTT  
AGGC-----AGAATACCGTCACCCATT-----TTTAGTACTAACTGAACATGCTC-----  
-----GAGAAAATG-----  
GAAGAAGAAGAAGATTTGATAACAATGAAGAAGAAGATTTGATAACAATGAAGAAGAAGATTTGATAACAATAAAAC  
G-----GTTGATTATATGTAT---GGGAATCAAGAAAATTTGAAGTTCAAA---ATACTTGAA-----  
-----AAAAAGCAAAA-----  
-----  
GATGAAGAAAAGAACTTTTTTTTTATTTGAAAAACCTATTCTGACCTTTTTTTTTCGATTATAACCGATGGAATCGTCCATT  
ACGATACATAAGAAAGATAAAT-AAAAAATTGAA--AGGCTCTGTAAGA-----  
AAAGAAGCCTCACAATATTTTTTTTTTATACATGCCAAAGTGATGGAAAACAAAGAATATCTTTTACATATCCTCCGAGTTT  
GTCAACTTTTGGAGAAATGATAGCAAGAAGG---ATATCGTTG---TCTACATTAGAAAAAATCTCCCCTGATGAA---  
CTATACACCGAGTGGGTTTTTACCAATAAAGAGAAAAAGAAC-----  
AACTTAAATAATGAATTTATAAATAGAATTGAAGCCTTAGAGACAGTATTTCTTTCTCTAAATATACTTGAAGCAAAGAC  
TAGATTGTCTAATGCTGAGACTAAAAACAAAAACAATTGCTTAGTTAAAATGTATGATCCCTTTTTGAAATGGGATGTATC  
GCGGAAGAATGAAGAAATTGTTTTCTTCTTCAATCATAAATGAA-----ACTTCG---  
ATAGAAAATTGCACAGAAACAGCTGAACTAAATAAAATTCATGATATCCTTCTTCCCTATCCTAAT-----  
TCTCCAGAAAATGAACAGAAAATCGAAAGATCAGAAAAAAA-----  
-----  
--AAACGAAAATGATTCAAATAATGGGTAA-----AG-----  
TTTTCATTGAACGAAATTCTAACTAACCTAAACGT-----GAAAA-----  
AAATATATTGGAATAAACGAAATAGGTAAAAACCCCTCGATGGTCATACAAATTAATCAACGAGTTG-----  
GAACAATATTTAAAAACGACGAAAAGAACAAGGCATAATGCAAGGACTGGATCACCAGCTTCGAACAAGAAAATTTAA  
ACATATAGCTTTTTTAAACGCGTTCGAAACGAAGTTTTAAGAAGTCTCATTTCAGAATTATAATCTTTATAGA-----  
-----  
-----AAATTTAATAGAGAT-----  
TCGGGTTTTATAAGTTATTTGGAAGAACCGGATTTTCGTCGAGCCGTAATCAAAGATTCTATGCGTGTTCAAAGGCGTAA  
AATGGTTATTTGGGGACCGTCTCAAGGAAATCCCCATTCCCCCTTTTTTTGGAAAA---ATGGAA-----  
GATTTT---CCTTTT---CCTATATCCGACCTAATGAAACTTTTTTTTTAATATTAGAGATTGGTTAGGT---  
AAAAAGTCAGAATTCGAAATTTTAGATCAACAATTCCAA-----  
-----ATAAAAAAAAATAACCAG-----GAG-----  
--  
GACGTAATAGAATTCTGGGAGAACATTCCATATGCACAAAAATCAAGAAGTGTGTTTACTAGCTCAATCAATTTTTAG  
AAGATATATTAATTACCCTTATTGATAATAGCTAAGAATATTGGTCGTATTTTATTACGACAATCTCCGGAATGGTACG





Jasminum GCATCGAGCATTGGCTAGACCTCATAACAATAACTGTCCTAGCTCTACCATATCTTTTCGTGTAT--  
---TTCATCTTTTACACTGACAAACGCTTTATGCAT-----  
CCTCGCAAAAATGCAATGCTTAACACAACAACCTTCAATGCGTAATTTTCAGCATTCAATGTGTATTCCCTGAATAATCTCAT  
TTTTCAATTATTCAACCATTTTCATTTTACCAAGTTCAATGGTAGCCAGATTAGTCAACATTTATATGTTTCGATGCAACA  
ACAAGATGTTGTTTGTAAACAAGTAGTTTTGTTGGTTGGTTAATTGGTCACATTTTATTCTGGAAATGGCTTGGATTGGTA  
TTAGTCTGGATACGGCAA--AATCGA-----  
TCTATTTCGTATTAGACCAAATGTACTIONTATCCGTTTTATAAGCTCATTCCGGCTTGATAAGTAC-----  
CTTGTGTCAAAATGGGGAGATAGGATC-----TTTTATATTCTGGTAATTCTTATC-----  
TGGTTCTACTTAGGAGGC--AAAATACCGGCACCCCTT-----  
CTTTCTATGAAATTCGACGAAAGCACAATACAACCTGGAAAAAGGGGCGAAAGGGAAAAAGAAAAAGGGGGAAAGGTGA  
GGAAGAAGGAGATGTAGAAAAAGAAGATGAAGTTGGGGTTGGGGAAAAAGGGGGAAATCGATGAAAGCGAAGAAATCC  
GAGTGAATGGAGAACCTTTCAAATCTCTTGTGGCTCATTTTTTTGTTTTTGTATCCTAACCATTTTGCGACTCTTCTTTTT  
GATCCTAACCCTTGAATCGACCATTTTCGCTACATAAAAAATGATCGATTTGACAACGCTTTTCAGAACTGAAATGTCACA  
ATATTTTTTTGACACATGCCCAAGTGTGAAAGGAAAGAATATCTTTTACATATCCACCCAGTTTGTCAACTTTTTGGG  
AAATGATCGAAAAGAAGATATCTCTGCCTACACTAGACAAATTCTCATCTAATGAACTTTCCAATCATTGGGTTTATACC  
AATGAACAAAAAGTAATAATTTAAAGAACGAATTTGTAATCGAATTGAAGCTCTAGACAAAGAATCCGTTTCTTTGAA  
TAGACTCGAAACAACGAGTAGGTTGTGCAATGACAATACTACAAAGGAATACTTACCGGAACCCTATGATCCTTTCTTGA  
ACGGACCATATCGGAGAACAATAAAAAAACGAAAAGCCTTTACCTGAAAAAACTTCGGGAGACAATTTGGAAACTTCG  
AGAGACAATTTGGAACTTCGAGAGACAATTTGGAACTTCGAGAGACAATTTGGAACTTCGAGAGACAATTTGGAAAC  
TTCGAGAGACAATTTGATAGACAAAATTTGGGATAAATCGGATTTCATAGTATCCTTCTTCCGGATATTCCAGATACTGATT  
ACCAAAAATTTGGAAGATCAATTTGATAAAAAACAATTATCAATCGAAATTGTTGATTTATTCACTTTTCGCTTTTCATCAGT  
GAATTTGGTAAAAAAAAGGTCCAAAATCAGAATCGAATTTAATTTTCGAGGGATCTTTTAATTTTCGAGGGATCTTTCTGT  
ATTTTCAGACGAAAAAGAAGTAAGAATAGAAGACGAAAAGGAGTAATCATAGACGACGAAAAAGGAAAAAATATTTTCG

AATATTTAGAAAATAGAATTGGAAC TAATACTGATGATGAAAATATTGATAAAGATTTCGATAGCAAAAATCCGTAAAAA  
GTGTCTCGATGGATATACAATGCAACCAGCGAGTTGGACCAAGCATATGGAGAAGATGAAAGAAAGGACCCAATGGATAA  
TGAAATTCGCTCAAGAGATGCCAAACGTGTAATAGTTGTACCAAAAAGAAAAGCTAGAGCGTGATGATGATGATGAGG  
AGGAACCAACCGATATAGACAAGATAATCTTTCCAGAACATGGAGATTTTCGCCGAGATGTAATCTGGGGTTCTATACGT  
GCTCAAAGACGTAAAATAGTTATTTGGAGAACGCTTCAAAGATACACGCATTCCCCTCTTTTTCTTGACAGCCTAAAAGA  
CTTCCGACATTATTTGTTGATTTCTTCTTGATATTCTTAATATCTTTGAACCAATTTGGAGAATTATTCGAAATTTGC  
GAATTTTCTAATAAAGCTAATAAGGAAAAGGTTTCGCACTCAAAATTTTAGAACATAGAGAAGAGCAGCAAAACACATAGA  
GAAGAAAAAAAAAAAAAAAAAGAAAAGACGAAAAAAAAATGAAAAAAAAATGCAAAAATGCTGAGGACCCGGAGCGAGAGCCCG  
ACTATGGGTATCCGAGTTCTGGACAATCATTGAATATGCGCAAGAAGTGAGAGGTTGCGTATTACTAACTCACTCTTTTA  
TTAGAAGAAATATTGTAATACCTTTATTGATAATAGTGAAAAATATTGGACGTATGTTACTATTTCAACGTCTCTGAATTG  
TATGAAGATTTTCGAGGACTGGCAAAGGGGATCACATGTTAAATGTACCTATGAGGGTATTCCATTATCCGAAACAGACTT  
TCCGGAAGATTGGTTGGTAGAGGGTATTCAGATAAAAATCTTATATCCTTTCCGTCTGAAACCTTGGCACGTACCTGGAT  
CTGATTCAGATCAAAATCGAAAAAAAAAGCAGAAGAAAAAGGGGATTTTTGTTTTTAAACAGTTTATGGAACGAAACCAAC  
CTTCTTTTGGTTATTCCCAGACTACCACCCCCACTTTTGAGTCTTTTTTAAACCTATTTTTTCAGGAACTCAAGAAACA  
AATGAGAAATTCGAAAAAGAACATTTGGAAACTTGGAAAAATGCTTTTTCAAAGAGTAAAGGAACAAAATTCCTTCGAA  
AAGTTGCAAAAAATGGGTTTCGCAAAAGTATCATTTTGGGGAAAAAGATAATAGAAGGTTTGAAGAAATAAAAGAACTC  
GTAAAAAAGAAAGAGATCCCATAACCAGCAATCAGATGATTCTGAATCATTACTCAAATTTTCTCCTCAAGTTTCGAC  
AAATTCAGAAAAAAAAAGAAACAAAATGCAGGATCTTACTAATAGAGCAAATAAAGCTAGAAATGAAATCGAAAGAATTC  
GAAAAGAGAAAAAAAAAAAAAAAAAGAGGAGTCTTAAGAAAACAAGTTCTAATGCTAAAAGATTGCAAAGAATAAAGGATCGA  
TTAATCCGTAAATTACCCGTTTTATTTGAAATTATTCATTCAAAGAATATACACAGGTATTTTTTCTCTATCATTAAATAT  
TCGCAGAATGAGTCAAAATTTTCGAAATAAATTCATTCCAGATCAAGAAAAGAAAAGATATATTGCCTTTTATTTATACTA  
TAAATAAAATAAAAGAGTCCCTTTATACTAATAATAGTGAGGAAAATTCACATATTTTTTATGACTTGTCTACTTGTCA  
CAAGCATATGTGTTTTACAAATTATCAGAAATCCAACCTTAGTAATTTGGATAAATTCAAATCAGTTCTTCAATATCAAGG  
AATCCCTTTTTTCTTAGGTCTGAAATAAAGGATTCTTTTAAACACAAGGAATAGTTTCATTTCGAAGAGACTTCCGAGTT  
CGGAAATGAATCAATGGAAAACTGGTTAAGAGGGCATTCTCAATACGATTTATCTAAGACCAGATGGTCTATATTAATA  
CCACAACGATGGCGAAATAGAGTTTCATCGTATGGTTAAAAGGAAAAATTTCAACAAAAGGAATTTATATGAAAAATATGA  
AAAAGATCAATTCATTGATTCCAAAAAAGAAAATATTTGTGAAGTCTCGAATCGAAATCAAAAAGATGATAATTTCAA  
AATGCTGTAATATGATCTTTTATCATATAAATCTATTCTATTCTGAAAAATAAAGGACTCTAGATCGTGTGTTGATAAG  
CTTTCTTTCAATTTCAACACAGCTTTTTTTGATCTGTTGGTGGATAGGGCGCGGGGGATGCCTATCGATATCAATAATTT  
GACAGGAACAGGCGATATCCATATACGGAAAAAATCCCGATAGAAAATATTTGGATTGGAAAATGATCCATTTTGATT  
TTATTAGAAATCAATTAGATATTGAGAACTGGATCACGATCGATGTCAATAGGAAAAGACAATAGGAATCAAAAAGACTCCG  
ATTTATACTAATAATTATCTTACTAATGATCATGATACGAATTTTGAATAATTTATAAAATGATAAAAAAACGAAAA  
ACCAATTTTGGATTTGGATTTTCTTAGGATTCAGAAAAGAATCCATCAAACCTCCTCCAAAGGATTTTTTGGATTGGATGG  
GGTTGAATGAAACACAAACACATCCCGTCTGATTGAACAAATTC AACAGATTGAAGATGGAGGCTAATTTATTCCCAGAA  
ATTGTCTGTTTTATAATGCATATAAAAACGCAACCTTGGCTTCTATCAAGCAAATTA CTCTTTTTAAATTTGAATAATAA  
TGAAAATGAAATTAATGCAGATAACGAAAAGAAATGAAAAAAAAGAAAGCAAAAAAAGAAAGCAAAAAAAGAAAGCAAAAAAAG  
AAGCAAAAAAAGAAAGAAAAACAAAACATAAAAAAGGAACTCACAAACAAAGGGGATCTTGA AAAACAAAGGGGATCTTGAA  
TCCGTTCTTCAAAGGAAAAAAATCCTTCAAAGGATTCAAAGGAAAAAAAAGATATTCAAAAGATTCTGCGGAATCGAC  
CACGAAAAAAGTTACGAGTAAAGAACTACAAAAGAACTAGATGCGTTCTGCAACGTTATTCTGTTTATCTAGTGAAAT  
GGAACCGGCGGGTGGATCCAGATATAGTTCCAAAATCCGAAATAAATTGGGAGGTATATTCTTACCTGTATAGACTATTC  
GACGATGAAATCCAAGAAACAGAAAAGAAATAGATCCAACGCACTTGGTTCTATCCTCGGCAAGAGAG

Lactuca GCATCTAGCACTGGGTAGACCTCATAACAATAACTGTCCTAGCTCTACCGTATCTTTTGTTCAT--  
----TTCTTCTGCAATACTCACAACACTTCTTTGAT-----TATGGATCTACTAAC-----

AGAAATTC AATGCGTAATCTCAGCATTCAATGTGTATTCTGAATAATCTCATTTTTTCAATTAATTC AATCATTTCATTTT  
ACCAAGTTCAATGTTAGCGAGATTAGTCAACATTTTTATGTTTCAATGCAACAACAAGATTATTTTTGTAACAAGTAGTT  
TTGTTGGTTGGATAAATGGTACATTATATTGATGAAATCAATTGGATTGTTAGTAGTTTGGATACGCAAA---

AATCGA-----TCT-----ATTCGT-----GTACTTATTTCGATCTAAT-----  
----AAGTCC-----

TTTGTGTCAGAATTGGCAAATCTATGTCTATAGCTGGTATCCTTAATATTTTTATTATTTGTTACCTGTGTGTATTATTT  
AGGT-----AGAATGCCGTTACCCATT-----

ATTAATAAGAACTGAACAACCTCGAGAAAATGGACCAAGCGAAGCTTAAAAACAATACACCGCTTTCTTATATATATAA  
GAATCAAGAAGATTTGTATTTAGAAATACTTGGCAAAAAAGATAAAGAAAAATCCTTTTTCTTTGTTTGA AAAACCTATTC  
TGACCTTTTTTTTCGATTATAATCGATGGAATCGTCCATTACGATACATAAGAAAAATAAATAAAAAATTTGTCTGTAAGA  
AAAGAAACGTCACAATATTTTTTTTATACATGTCAAAGTGATGGAAAAAAAAGAAATATCTTTTACATATCCTCCCAGTTT  
GTCAACTTTTGGGGAAATGATAGCAAGAAGGATATCGTTGTCTACATTAGAAAAACTCTCCGCTGATGCACTATACACCG  
AGTGGCTTTATACCAATAAAGAGAAAAATAACAACCTAAATAATGAATTTATAAATAGAATTGAGGCTTTAGAGACAGTA

TTTCTTTCTATAAACATACTTGACACAAAGACTAGATTGTGTAATGTTGAGACTGAAAAAAAAAGAATTGCCTAGTTAA  
CAAAAAGAATTACCTAGTTAAAATGGATGATCCCTTTTTGACTGGGATGTATCGTGGAAGAATCAATAAATTGTTTTTCAT  
CTTCAATCATAAATCAAATTTTCGATAGAAAATTACGAAAAACATATGAACTAAATAAAATTCATTATAACCTTCTTCCC  
TATCCTAATTCTCGAGAATATGAACATAAAAATAGATCCTAATTCTCCAGACTATGAACAGAAAATAGAAAATTAGAAAA  
AATCCAAGCCCAAATTGATTTAAATAATCGGTTTCATTTTTTTATGGACCACAATTATAGCTAAACTTAAAGGTCAAAAA  
ACTCTAGTAGAATAAACGAAATCGGTAAAAAACCCCTCGATGGTCATACAAATTAATAAACGAGTTACACCAAATTTAT  
AAAAACGACGAAAAGAACAAGGCATAATACAAGGGCTGAGACACCAGCTTCGAACAAGAAAATATAAACATATATATTT  
TTAAATCGTTTCGACACGAACCTTTAGAACTTTGAAACAGTCTAATTTAAATAATTCTAATATGGATAAAAAATTTAATA  
ATAAAGATTTGGGTTTTATAAGTTATTTGGAAGAACCAGATTTTCGTTCGATCCTTAATCAAAGGATCTATGCGCGCTCAA  
AGGCGTAAATTTGGTTATTTGGGGACCGTATCAAGGAAATCCTCATTCCCCGCTTTTTTTGGAAAAAAGCAAGATTTCCC  
TTTTCTATATCCGACTAATCAAACCTTTTTTAAATATTAAGATCGGTTGGGTAAGGTCAGAATTCGAAATTTTAA  
ATAAACAAATCCCCCCCCAAAAAGAAACAACCAGGAAGACGTAATGGAATTTCTGGGAGACCATTCCACATGGACACAAAA  
AGAGGTATTCTGTTACTAGCTCAATCAACTTTTAGAAAAATATATTAATTTACCTTTATTGATAATAGCTAAGAATATTGT  
CCGTATTTTTATTACGGCAATCTCCGGAATGGGATGAGGATTTCCAAGATTGGAATAGAGAAATTTATCTAAAATGCAGCT  
CTAATGGTCTTCAATTCTCCAAAACAAAATTTTCTAAAATTTGGTTACGCGGAGGTTTTTCAGATAAAAAATCCTATATCCT  
TTTCATTTGAAACCTTGGCACAGATCTAAGCTAAGACTCTATGATTCTGATAGAGATCTAAAGCAACAAGAGGATTTTGA  
TTCTTGTTTTTTAACAGTTTTGGGAATGGAAACGGAACATCCTTTTGGTCTCCTCGAAAAACACCTTCTTTTTTTGAAC  
CCATTTTTTAAAGATATAGACTATAAAGTCGAAATCAGAAAATTAATTTTTAGAGTTTGAAGAATTTTTAAAAAATAAAA  
AAGAAAGAAGCAAAAGCATTTTTTCTTTATAAAAACAAAAAATAAAGAATTTTTAAAAGGAAATAAAATTCATTATTTCT  
ACCGAGAGAAATATATGAATCAAGTGAACCTCAAACAGAAAAGGATTCATAATCAGCAATCAGATAATTCATGAATCAC  
TTAGTCAAATTCGATCTACAGTTGGACAAATTTATTCACAGGCAGAAGAAGAATGAAACATAGGATTGATAGAAGAAAG  
ACAATCAGAAATGAAATAGAAATAATGAAAAAAAATAAAATTAATAATGCAGAATCATCCCAAAAAATTTTTGAAATATT  
AAAAATAAAAAATATTGAATTATTAGTTAAATTTTTTATTGAAAAATATACATAGAGATCTTTCTATGTATCATTAATA  
TGCGCAGAATCCCTCTACAACCTTTTTATCCAATCAACAAAAAATTTATTGATAATGATAAATACATTAACAATAATGAA  
ACAAATCAAGAAAGGATTAATAAAAACAAAACAAAATAAAATTTGACTTTATTTTTGTCTATGACTATAAAAAAGGGCTTTTGA  
TAATCTTAGAAATAGTAAGCGGAAGTCAGATATTTTTTTTGGATTTATCTTACTTGTCCAAAAATATGTATTTTTTCAAAT  
TATCACAACGCAGATTTAATCACTTCAATAAGTTAAGATCTATTCTTCAATATAATGGACCGTCTTTTTTGTCTTAAGACT  
GAAATAAAGGATTTTTTTGGAAAGCAAGGCATATTTTCAATCCGAATTAAGACATAATAAACTTCCAAATATTGGAATGAA  
TCCATGGAAAAAATGGTTAAGAGGTCATTATCAATACGATTTATCTCAGATTACATCGTCTAGATTAAATCCCCAAAAAT  
GGCGAAATAGAATCAACCAATGCCAGACGTCTCAAAATAAAGATTTAAACAAATGGTATTTCTCTGAAAAAGACCAATTA  
CTTGATTCAAAAAAACAATAATCGAAAGTCTATTTATTACCAATAAAGAGGATAATTTAAAAAATACTATAGATA  
TGATCTTTTTATCATATAAATATATTTCAATCTGAAACTAAAAAATACTACTATATTTATAGATCATCATTAGAAACAAATA  
ATAACCAAGAAATTTCCACCAGAAATAAAGAAAAATTTTTTAGCATACTCAAGAATATTTCTAGCAAGAATTTATTTAGGA  
AAAAGCGATATTATATATATGGAAAAAATAAAGATAGAAAATTTTTGTATAAAATTAATAAAAAATTTAAGGTTGAACC  
TAATAAGGACCAATAAAGGATAAAAAATAAGGACCAAAAAAAGGATAAAATTCATAATAATGGTCTTTTTTTATCTTCCGA  
TTGATTCAAATTTGGAAATAAATTACAAAAAGGTATTTTTTTGATTGGATGGGAATGAATGAAAAAATCTTAATCTTAAAT  
TGCCTCATATCGAATCCGAAAGTTTTTTTTCTTTCCAAAGTTTGTGAGACTTTATCATAAATATAAAGAGAAACCTTGGTT  
TATTTCAAAGCAAATTTACTTCTTTTTTAATTTGAATATCACTTCCAATTTTGTGAAAATCAAATATCAACGGAAAGCAAG  
AAGAGTATTTTTTTGAAGCAAGAAGAGTATTTTTTTGAAGCAAGAAGAGGATTTTTTTGAAGCAAGAAGAGGATTTTTTTGAAG  
CAAGAAGAGGATTTTTTTGAAGCAAGAAGAGGATTTTTTTGAAGCAAGAAGAGGATTTTTTTCAAATTTAGACCATCAAATTC  
AAAACAATATTTTTGAATTAATAATCAAAAACAATATTGAAGAATACTTTTTTAGAATCCACCAGAAAACTAAAAATATTCC  
TTAAAGGAGATTTTCTTTTGAATTAAGATGGGCTGGACGTGTCAATCAATTGAATCAAAAAATAATGAATAATATCCAG  
ATATATGGTCTACTACTTAGCCTGATAAATGTGAGAAAATTTACTATATCTTATATTCAAAGGAAAGAAATGGATCTGGG  
TATAATGAGTAGGAATTTAAATCTTACACAATTAATGAAAACAGGAATATTAATTTCTGGAACCTGCCCGCCTATCTCTAA  
AAAATGACGGACAGTTTTTTATGTATCAAATCATAAGTATTTTCAATTTGTTTCATAAAAAGTAAGTACCAAAGTAATCAAAGA  
TACCAAAAAACAAGAAAATGTTGCTAAAAATATAGACAAAAAGAATTTCTGATTTGCTTGTTCCTGAAAAAATTTTATCGTC  
TAGACCCGTAGAGAATTAAGAATTTCTATTTCTTTTTAATTTGAATTTAAAGAATAACACTGGTGTGGATAGAAACACAT  
TAGTTTACAACGAGAACAAGATAAAAAAATGGAGTCAATTTTTGGATGAAAATAAAGATTTTGACATAAAAAAATAAGAA  
TTAATTAATTTCAAGTTCTTTTTTTGGCCTAATTATCGATTAGAAGATTTAGCTTGTATGAATCGGTATT

Liriodendron GCATCTAGCATTGGATAGACCTCATACAATAACTGTCCTAGTTCTACCGTATCTTTTGTTCAT--  
----TTCTTCTGGAACAATCACAACACTTTTTTTGAT-----TATGGATCTACTACC-----  
-----  
AGAAATTCATGCGTAATCTCAGCATTCAATGTGTATTCTGAATAATCTCATTTTTTCAATTATTCAACCATTTTCAATTT  
ACCAAGTTCAACGTTAGCCAGATTAGTCAACATTTATATGTTTCGATGCAACAACAAGATGTTATTTGTAACAAGTAGTT  
TTGTTGGTTGGTTAATTGGTACATTTTCTTTCATGAAATGGGTTGGATTGGTATTATTCTGGATACGGCAA---  
AATCAT-----TCT-----ATTAGATCTAATGTACTTATTTCGATCTAAT-----  
----AAGTAC-----CTTGTGTCAGAATTGAGAAATTTCTATG-----

GCTCGAATCTTTAGTATTCTCTTATTTATCACCTGTGTCTACTATTTAGGC-----AGAATACCGTCGCCTATT-----

GTCCTAAGAACTGAAAGAAACCTCAGAAACGGAAGAAAGGGGGAAAGTGCAGAAAGAAACAGATGTAGAAATAGAAAC  
AACTTCCGAAACGAAGGGGACTAAACAGGAACAAGAGGCATCCACCGAAGAAGACCCTTCCCTTTGTTTCGGAAGAAAAGG  
AGGATCCGGACAAACTAGATGGGAATCAAGGGTATCAAGAAAATTGGAAGTTGGAAATACTTAAAGATAAAGACCTCTTC  
TGGTTTAAAAACCTCTTGTGACTCTTCTTTTCGACTATAAACGATGGAATCGTCCATTGCGATATATAAAAAACGATCG  
CTTTGAAAAACAGTAAGAAATGAAATGTCACAATATTTTTTTCACACATGTCCAAGTGATGGAAAAAACGAATATCTT  
TTACATATCCCCCAGTTTGTGCGACTTTTGGGGAATAATACAAAGAAAGATGTCTTTGTATACGACAGATAAACTATTA  
TCCCCAGAGGATCCGTATAATCATTGGGTCTATACCAATGAACAAAAAAGGCACAACCTTGAGCAATGAGTTCATAAATCG  
AATAGAAGCCCTAGACAGGGGAACCTTACTCTGGATGTGCTCGAAAAAAGCACCAGATTGTGCAATAATGAGAATGAAC  
AAGAATCTTTCTTAAATATATGATCTTTTTTGAACGGACCATATCGTGAACAACCAAAAAGGTATATTCACGTTC  
ATTATGGATGATTCATCAATCACTTGGACAGAGGATCCATAGAAAATGGTTTGGATAAATAAGATTCATGATATCTTTCCTAA  
TGATTACCGAGAATTTGAACAAAAAATGGATTTATTTAATGGAGAATCATTATCGACAGACATTGGCCATTCTTGACCT  
CAATCAATAAATTCGCTGGGGAATCAGCACCTAATTTGAATTTGAAAGGACTTGCTTTATTGGCCGAACAAAGAAGACTT  
GATTTCAGAAAATCAAACGAAATGTTTGAATTTCTATCCGATGTAGTTACAACCTGATCCAAATGATCAAACAATTCAAAA  
TAAATATATTGGAATAGAAGAAATCGGTAAAAAGGTTCTCGATGGTCATACAAATTGACCGACCATTGGAAGAACAAG  
AGAAAGAAAATGAGGAAGAATCGACAGAGGATCATGGGATTCGTTCAAGAAAAGCCAAACGCGTGGTAATTTATACTGAT  
AATGATCAGAATACCAATACTTATACTAGTACCAGTACTAATAGTGATCAAGCAGAAGAGTTGGCATTGATACGTTACTC  
GCAACAATCGGATTTTCGTCGGGATCTAATCAAAGGATCCATGCGCGCTCAAAGACGTAAAACAGTTACTTGGGAAATGT  
TTCAAGCAAACGTGCATTCCCCACTTTTTTGGACAGAATAGACAAAACCTTTTTTTTTTCTTTTGATATCTCCGGAATG  
ATGAACCTCATTTTTAGGAATTTGGGTGGGGAAAGGCCCGGAATTCAAAACCTTCGGATTCTGAGGAAAAAGAGGCCAAAAGA  
AAAGGAAAAAACAAAGGAGGAGAAAAAAGAGGAGAATGAACGGATAGCAATAGCAGAAACTTGGGATACTATTATATTTG  
CTCAAGCAATAAGAGGTTCTATGTTAGTAACACAATCGATTCTTAGAAAATACATCGTATTGCCTTCATTGATAATAGCT  
AAAAATCTCGGCCGTATGTTATTATTTCAATTCCCCGAGTGGTACGAGGATTGGAAGGAGTGGAAATAGAGAAATGCATGT  
TAAATGCACCTATAATGGTGTTCATTATCAGAAACAGAATTTCCGAAAAGACTGGCTAACAGACGGTATTCAAATAAAGA  
TCCTATTTCTTTCTGTCTGAAACCTTGGCACAGATCTAAGCTACGATCCCATCATAGAGATCGAATGAAAAAGAAAGGA  
AAAAAAGAAAATTTTTGTTTTTAAACAGTCTGGGGAATGGAACTGAACTACCTTTTGGTCTTCCCGAAAACGACCTTC  
CTTTTTTGAACCCATTTGTAAAGAACTCGAAAAAAAATTCGAAAAGTGAAAAAGAAATGCTTTCTAGTTCTAAGAGCTT  
TAGGGGAAGAACAATAATGGTTTCTAAGGGTCTTAAAGAAAATAAAGAAACAAGATGGATTCTCAAAACAGTTCTATTTAAAA  
AGAATAATAAAGAATTTGCAAAAGTAAATCCCATTTTATTATTTGGATTGAGGAAAGTATATGAACCGAATGAAAATAG  
AAAAGATTCTATAACTAATAAAGATTAACCATGAATCGATCATTTCGAATTAGATCTGTGGATTGGACAAATTATTAC  
TGACAGAAAAAAAATGAAGGATCTGGCTGATAGGACAACCACAATCCGAAATAAATAAGAAAGGATTACAAAAGACAAG  
AGAAAAATATTTCTAACTCCAGATATAAAGATTAGTCTAACGAGACAGGTTGTGATGATAAAGATCGGAATCACAGAA  
ACATATTTGGCAGATATCAAAAAGAAGAAGTGCCCGATTAATACGTAAATGGCACTATTTTTATGAAATCTTTCATTGAAA  
GAATATACATGGATATCTTTCTATGTACCATTAATATTCCCAGAAGAAATGCACACCTTTTCTTGAATCAACAAAAAAA  
ATTATTGACAAAGACATTTACAATGATGAAAGAAATAAAGAAGGAATTGATGAAACAAATCAAATGCAATTCACTTTAT  
TTCGACTATAAAAAAGTCGCTTTCTAATATTAGTAATAATAAATCACAGATTTATTGTGACTTATCTTCTTGTCCCAAG  
CATATGTATTTTACAATTTATTACAAATCCAAGTTATTAATAAATATTACTTGAGATTTGTACTTCAATATCGCGGAGCA  
TATCTTTTTCTTAAAGATAGAATAAAGGACCATTTTGAACACGAGGAATATTGGATGCCAAATCAAGGCCTAAGAAACC  
TCCGAATTCGGAATGAATGAATGGAAAAATGGTTAAGGGGTATTATCAATACAATTTATCTCAGACTAGATGGTCTA  
GATTAGTACCGCAAAAATGGCGAAATAGAGTCAATCAACGTGTCGATTCAAAATAAAGACTCAAAAAAGATTTCATAT  
GAAAAAGACCAATTCATTACATTACGAGAAACAAAATAATTATGTAGTGAATTCATTACCGAATAAAAAAGAAAAATTTAA  
AAAACACTACAGATATGATCTTTTATCACATAAATATATTCAATATGAGGACAGGAAGGATTTCATATATTTATGGATCGC  
CATTACAAGTAAATGTAATGGAGACCGAGAGATCCATATAATTACAACACGCCTAAACCCGAATCATTTTATGTACCT  
AGGGGTATAGCTATTAGTGATTATCTAGGGGAAGAGTCTATTATTGATACGGGGAAAAATCCGGATAGAAAAATTTTGG  
GTGGAGAATTTCTCAATTTTTTCTTAGAAAAGAAATCGATATTGAGACCTGGATCGATATAGATACTGGGACCAACATTA  
ATAAAAAATGCTAAGACTGGTACTAATGATTATCAAAATAATTGATAAGAAAGATCTTTTTTATCTCCCGATTTCATCAAGAA  
ATCAACCCATCCAATCAAAAACAAGGTTTTTTTTTGGATTGGATGGGAATGAATGAAGAAATGCTATATCGTCCCATATC  
GAATCTAGAACCCTGGTTCTTTTTCAGAATTTGTGCTACTTTATGATGCATATAAGATTAACCGTGGATCATACCAATCA  
AATTACTTATTTTCAATTTGAATGGAAATGAAAACATTAGTGAATAAAAAACATCAACAGAAATCAAAAAAGGATCTT  
CGTCTATCATCTAATCAAAAAGAATATCTTGAATTAGAGAATCGAAATCAAGAAGAAAAAGAACAGCTGGGTCAAGGGAA  
TCTTGGATCAGATCCACGAAACCGACAAAAAGATCTTGAAAAAGATTACGCGGAATCAGACATTAAAAAACGTAGAAAGA  
AAAGACAATCCAAGAGCAATAAAGAAGCAGAATAAATTTCTTCTGAAAAGGTATTTGCTTTTTTCAATTGAGATGGGAT  
GATCCTTTGAATCAAAGAATGATCAATAATATCAAGGTATATTGTCTACTGCTTAGGCTGATAAATCCAAAGGAAATTC  
TATATCTCTATTCAAAGAGGAGAAATGCGCCTGGATGTAATGCTGATTGAGAAGGATCTAACTCTTACAGAATTGATAA  
AAAGGGGAATATTGATTATCGAACCGGTTCTGCTGTCTATAAAATGGGATGGACAATGGATTATGTATCAAACCATAGGT  
ATTTCTGTTGGTCCATAAGAATAAGTACCAACTAATCGAATATGCCGAGAAAAAAAATATGTTGATGAGA

Lotus GCATATAGCATTAGATAGACCTCATACAATAACTGTCATAACTCTACCGTATCTTTTATTATAT--  
----TTCCTCGGCAATAATCAAAAAAAGCTTTTTGAAT-----TATGTATACAAGAAT-----  
-----  
CAAAATTC AATACGTCATTTTTAGTATTCAAAGAATATTCTTTTCAGAAATCTTTTTTTTTTCAGTTATTAAACCCCTTTTTTTTT  
ACCAAGTTCAATCTTAATGAGATTAGCGAACATTTATATCTTTCAATCAAACAATAAAGTCTTATTTTTTAACAAGTAGTT  
TTGTTGGTTGGTTAATTTGGTCATGTTTTTTTCATGAAATGGATTGGATTAATGTTAGTCTGGATACAGGAAAAAACAAT  
-----TCT-----ATAAAATCAACAGTAGCTATTTCGATCTAAT-----  
AAGGGG-----GTTCTGGCAAAATTTAGAAAAGTCTATG-----  
TTTCAAATTTTTCTTATTTTTTTTTTTTATTACCTGTTTATATTATTTAGGA-----AGAATACCG---  
CCCATTTATTTTTTACTCCTAAAATGTCAGAAATTAAT-----GAAAGGGGTGAAATTGAAAAAAGG-----  
-----  
GAAGGGGAAATCGATATCGAAATAAATTCACAAAGAGCGGGAAGTAAACAAGAACAAAAGATAACTGCTGAAGAAAAGCT  
T-----TCTCCTTATCTTTTT---TCTAAAAAAAATAATAATTTGGACAAA---ATT-----  
-----  
-----  
AAAGAAGAGAATGATATCTTCGGATTTCAAAAACCTCTTGTAACTATTCTTTTTCGATTATAATCGATGGAATCGTCCATT  
GCGATATATAAAAAATGAT-----CGATTTGAA---AATGTTGTAAGA-----  
AATGAAATTTTACAATTTTTTTTTTTTTTACATGTCAAAGTGTGGAAAAGAACGAATATCTTTTACATATCCACCTAATTT  
GTCGACTTTTTCAGAAAATGATGGAAATGAAA---ATTTCTCTC---TTCACAAGAGATATAATCTCCTACGAAGAA---  
TTGTCTAATTTCTGGAGATCCACTAATGAAGAAAAAAAAAAAAA-----  
AAACTAACCAATGAATTTTTAAATAGGGTAGAAGTTTTAGATAAGGAATCTTTACCAGTGGATATATTGAAAACCGAAT  
TCGATTGTGTAATGATGAAAAAAAAACAAAAA-----  
TACTTAACTAAAGAATATGATCCTTTTTTGAATGGACCCTGTCGTGGACAAATCCAAAAATGGTTTTTACCCCAATTCA  
AAAAGAA-----ACTTAC---AAAAAAATTCT-----  
CTTTTTATAAATAAGATTCATGGTATCCTTTTTTCTAATACTAATAAT-----  
TATCCAAAATTTGAACAGAAAAAAAAATATATTTGATAGAAAAATCATTATTAAGTACATT---  
AATTTTTTTTTTAACTTAATCACTAAATTTTCAAGGAAATCTGTATCAAGTTTGAATTTT-----  
GAAGGACTTTTATTTTCCCAAAGATAATAAAGGAAAAATGTCTTCA-----  
----AAAAAAGAAAAA-----TTCTTATTTGACACAATTCGACCTGATCTGAATGATAAT-----  
AAAATTGTAAATCTCCAAAATGTATTGGAATAAACGAAATCGTGAAAAAACTTCCCCGATGGTCATACAACCTAATCGA  
CGAGTTG-----GAACAACCTGGAGGGAAAAAAGTAGAA-----  
TATCATCAAATTCGTTCCAGAAAAGCTAAACGTGTAGTACTTTTGACCAAAAATCACAATAATGACGATAATTATGATGA  
GACTACAGACACCGAT-----AATACT-----  
-----  
-----GAAAAAAGAAAAAGAA-----  
TTGGCTTTAATACGTTATTTCACAGCAACCAGATTTTCGGCGAGACATAATAAAAAGGATCTATACGCGCTCAAAGACGTAA  
AACAGTTACTTGTAAACTCTTTCAAAGAAGTGTGGATTCCCCTCTTTTTTTGGAAAAA---ATGGAA---  
AAAACCTCCTTCTTT---TGTTTT---GATATTTTAGATTCAAGTAAAATCTTTTTTATGTTCAAAAATTGGATAAGA--  
-AAAAAGAAAGAATTAAAAAAAGCTCGGATTATACGGACGAAAAAGCAAAAAGAAAGTCAAAAAAAGAAGAG-----  
-----GAAAAAATAAAAAAAGCAAAAA-----  
GAGGAAAAAAGACGTATAGAAATAGGAGAAGCTTGGGATAGCATTATATTTGCTCAAGTAATTAGAGGTTGTTTATTAAT  
AACCCAATCGATTCTTAGAAAATATATTCTATTACCTTCATTGATAATAACAAAAAATATCGTTTCGTATACTATTATTTT  
AATTTCCCGAATGGTCAGAAGATTTAGGGATTGGCAGAGAGAAATGTATATTAATGCACCTATAATGGGGTTCAATTA  
TCCGAAACAGAATTT---  
CCAAAAAATGGCTAACAGACGGTATTTCAGATAAAGATCTTATTTCCCTTTTCGTCTGAAACCTTGGCACAGATCTAAATT  
ACGATTTACTGAA-----AAGAAAAAAGATCCCCTGAAAAATAAAAAAGTAAAA---  
AAAAAGAACTTTTTGC---  
TTTTTAACAATTTTTGGAATGGAAGTTGAATTGCCCTTTTCTGGTTATCCCCGAAATCGATTTTTCATTTTTTTGATCCCAT  
TTTAAAGAAGCTCAAAAAAATGAAAAA---  
TTGAAAAATAATTTTTTCTAATTCTAAAAATTGTCAATGAAAGAACAAAAAAGCTTTATA-----  
ACCACCTTAAAAGAAACATCAAAACGGATCATCCAAAGTATTCTTAAAAAAGTTCTATTCTTAAACAAAAAATAAAA--  
-AAACTCTAC-----AAT-----TATTTATTTCTATTTAGGTTCAAAAAA-----  
ATAGATGAATTGAATCAAAACAAAAA---AAT-----TTC-----CCAATCACTAAGAATAATCCA--  
-ATAATTTATGAATCAACCATTCTA-----ATTCAAGCTATTAATAAGACAAATTGT-----  
TCATTGACAGAAAAAATAAAG---GCCATAAATGCTAAGACAAAGAAAATCATAAAGAAAATAGAAAGGATG-----

-ACAAAAGAAAATAAGGGTGGGTTTCTAATTTTCAGAG-----  
ATAAATAGTAATTCTAAGAAAACAAGTTCTAATACTAAAGGATTAGAATTAGAAAAAAGATTTTGCAAATATTA---  
CAAAGAAGAAATGTTCAATTAACCCATAAATTGTATTCCTTTTTTAAATTTTTACTGAATTTTATGAAAAAGGTATACAC  
TGATATATTTCTTTGTATCGTTAGT-----GTTCTAGGATCAATGTACAATTTTTTCTTGAATCA---  
ACAAAA-----AAAATTATAAATCAATCCATTTACAAT-----  
AAAAAACAAATGAGGAAATAATTGATAAAACAAATCAAAGTATAATTCATTTTATTTTCGATTATAAACAAA-----  
-----TCTTCT-----AATACTAAAAATACAAATTCAGCGGCGAATTCTTAT---  
GAGGTATCCGCTTTGTCCCAGGCATATGTATTTTTTAAAATATCCCAAATCCAAGTCTTAAACGTATATAAGTATAAATT  
CAAATATGTTTTTACTATGACGGG-----AGATCGTTTTTTATTAAGGATGAAATAAAAGATTATTTTTTT-----  
--GGAATACAAGGAATAATTCATTCCAAATTAAGACAT-----AGAACTCTCCC-----  
GTTTTCTTTAAAGAAT-----CAATGGACAAATTTGGTTAAAG-----GTTTAT---TAT---CAATAT---  
TATTTATCTCAGAATAGATGGTCTCGATTAGTACAAAAAACCTGAAAAATAGAATAAATAAACACCGTTTTGGATCAAAA  
TAAAGATTTAACCAAA-----TGTGATTCATATAAA-----AAAACCCAATTAATTGTTTTCCAAAAACAAAAA-----  
--CAACAAGTAGACTTTTTAGTAACTTATTAATACAAAAAAAATA-----  
AAAAACAATCTAGATATGATCTTTTGTATATAAATTTATTAAT-----TATGCAGAGAAGAAAGAATTATCTATT--  
----TATGGATATAGATCGCCATTCCAAGCAAACA  
Morus GCATCTAGCATTGGGTAGACCTCATAACAATAACTGTCCTAGCTCTACCGTATCTTTTTGTTTCAT--  
----TTCTTCTGGAACAATCACAAACACTTTTTTGAT-----TATGGATCTACTAAC-----  
-----  
AGAAATTC AATGCGTAATCTTAGCATTCAATGTGTATTCTGAATAATCTCATTTTTTCAATTATTCAACCATTTTCATTTT  
ACCAAGTTCAATGTTAGTCAGATTAGTCAACATTTATATGTTTCGATGCAACAACAAGATGTTATTTGTAACAAGTAGTT  
TTGTTGGTTGGTTAATTGGTCACATTTTATTGAAATGGGTTGGATTGGTATTAGTCTGGATACAGCAA---  
AACAAAT-----TCT-----ATTAGATCTAAT-----  
----AAGTAC-----CTTATGTGAGAATTGAGAAATTTTATG-----  
GTTCGAATCTTTAGTATTCTATTATTTATTACCTGTGTCTACTATTTAGGC-----AGAATACCGTCACCCATT-----  
-  
CTTACTAAGAACTGAAAGAAACGGAAGAAAGGGGGGAAAGTGAGGAAGAAAGAGATGTAGAAAAAACTTCAGAAACGAA  
GGGACTAAACAGGAACAAGAGGGATCCACCGAAGAAGATCCTTCTCCTTCCCTTTTTTCGGAAGAAAAGGAGGATCCGG  
AAAAAATCGATTTTAAAGAGACACGATATAAAAAATAAACCCGTTTATGAACTTATTATCTGGATGTGGATCGGAATCAA  
GAAATTCGAAGTTAGAAATATTTAAAGAAAAAAAAGAAGTCTCTGGTTTGA AAAACCTCTTGTGACTATTCTTTTCGA  
CTATAAACGCTGGAATCGTCCATTTCTGTTATATCAAAAACGATAAATTTGAAAATGCTGTAAAAAATGAAATGTCACAAT  
ATTTTTTTCATACATGTGAAAGCGATGGAAAAAAAAGAATATCTTTTACGTACCCACCCAGTTTGTCAACTTTTTTCGAA  
ATGATACAAAAGAAAGATGTCTCTGTTTCAACAGATAAACTTTACTCTGATGAATTATATAATAATTGGAGTTATACTAA  
TGAACAAAAAAGAAAAAACCTAAACAACAATTGATAAATATAATCAAGGATCTTGACAAAAGCTCTAGATAGTAAATTCC  
TTATTTTGGATGTACTAGAAAAAGACCTAGATTGTGTGATGATAATACGAAAAAAAATACTTACCAAAAGTATATGAT  
CCTTTCTTGAATGGGGCATAACCGTGGACAAATTAAAAAAAGGTTTTCACTTTCAATCAAAGATAAAGTTTCCATACAAA  
TTACATAGAAAGAGGTTGGATAAATAAGATCCACGGTCTCTTTCTTATTATTAATTATTTAGAATTTGAAGAAAAAAAC  
CATTTCATAGAATTGATAAAAGATTATTATCAACAGAAATGAATTTTTTCTTGAACCTAATCAATGAATTTAATGGAAAA  
CCAACATCAAGTTTAAATTTTAAAAAATTTTATTTACTTCTGAAACATAAAACAATTACGAATTAATTTAGAAGGACGAGA  
AAAAAAAATAAGATTTCTATTTGAAAGATTTCTAACGGATCCTAACAAATAAAACAATTAGAAAAACAAGCTATTGGGATAA  
AAGAAATCAGAAAAAAATTCGCAATGGTCATACAAATTAATCGACGATTTGGAACAAGAGGAGGGAGAAAACGAAGAA  
GCTTTGGGAACGGATTCTCAGATTGCTTCAAGAAAATGCAAACGTGTATTGATTTTTAATCATGAACTCGAAAAATACCAA  
TGGTTATAGTAATTCCTAAGATACTAATAATAATGATGAAAGGGACGACATTGCTTTGATACGTTATTTCGCAACAATCGG  
ATTTTCGTGAGACATAATCAAAGGCTCAATGCGCGCTCAAAGGCGTAAAACAGTTATTTGGAAAACCTTTCAAGCAAAC  
GTACACTCCCTTCTTTTTTGGACAGAATCGACAAAGATGTTTATTTTTCTTTTGATATGTTGAGGCCGATAAAAAAAA  
ATTTCAACATTTGGCTATGAAAAAGCCAGAATTCAAAATTTTCAGACTATAGAGAGAAAAAATCAAAGATAAAAAAAAAG  
AGAAGAAAAAAGAAAGGAGAATGCACGTATAGAAATAGCGGAAACCTGGGATAGCATTGTAGTTGCTCAAGTAATAAGA  
GGTTTTGTATTAGTAATCCAATCAATTTCTGAGAAAAATATATTATATTACCCTCATTGATAATAGTTAAAAATATTGGTCG  
TATACTATTATTTCAATTTCTGAAATGGTTCGAGGATGTAAGGATTGGAAAAGAGAAGTGCATGTTAACTGCACTTATA  
ATGGTGTTC AATTAGCAGAAAAAGAATTTCCGAAAACTGGTTAATAGACGGTATTTCAGATAAAGATCCTATTTCTTTT  
CGTCTGAAACCTTGGCACAAATCTAAGCTTAAGCTACGAAACAATTATAAGGATCCAATGAAAAAGAAAGAAACAACAAA  
TGATTTTTGTTTTTAAACAGTTTGGGGAATGGAACTGAACTTCTTTTTGGTTCGCCCAGAAAAACAATTTCTGTTTTTTG  
AACCTATTTTTAAAGAACTCAAAAAAGACTTATAAAATTA AAAAAGAAATGTTTTAGAATTCTAATAATTTTAAAGAA  
AGAACAAAATTTCTAAATGTCTCAAAAAGAAAGAAAAAATGGGTTATTA AAAAATATTGTATTTCTAAAAAAAATAAT  
AAAAGAACTTTCAAAAATGAACCCAATTTCTATTAGTTGGATTAAGAGAAATAGA ACTATATGAATTGAGTGAAAGCAAAA  
AAGAAAAAATTTGATAATCGATAACGAGCTAATTCATGAACCGTCCATTAACATTC AATCTACAAATTTGGACAACTTTT  
TCATTAACAAAAAAAATAACAAGATCTA ACTAATAGAACAACACAACCATAAATCAAATACAAAAAATTTCAAAGA

CAACAAAAAAGGATTTCTAAGTCCACATATAAAATATTAGTTCTAATAAAAATGAGTTATAATGATAAAAAGATTGGAATTAC  
CAAAAAATATTTTTGCAGCTATTA AAAAGAAGAAATGTTTCGACTAATCCGTAAATCAAATTATTTTTATAAAAATTTTTTCATT  
GAAAGAATATATAGAAATATATTTTTTATTTATCAGTAATATTTCTTAAAATAAATGCACAACCTTTTTTTTTATTTTTTTTGA  
ATCATTAAAAAAAATTTGTTAATAAAAACCAGTTTCTATAATAACTATATTTACAATAATGAAAGAAATCAAGAAAAAATTG  
ATAAAAACAAATCAAAAAGATAACGCAGTTTATTTTCGACTATAAAAAGAGTCACTTTCTAATATTAATAATAAGAACTTGGAA  
ACTTTTTTGTAATTTATCTTATTTTGTCCAAAGCATATGTCTTTTACAAATTATCACAAAGCCGGGGTTTTAACTTTTTTAA  
TTTATATAAGTTAAGATTAAGATCTGTCTTTCAATATAATGGAGCTTTTCTTTTTCTTAAGAATGAAATAAAGGATTATT  
TTCTTGGAACACAAAAAATATTTTCATTCCGAATTAAGACATAAGAACATCCCAATTATGAAATAAATCAATGGAAAAAT  
TGCTTAAGGGGTTATTATCAAAAATAATTTATCTCAGTCTAGATTAGTACCACAAAAAGGTATAAATATAGTAAATCAACA  
CTCTATAGCTCAAAAATAACCATTTAAACAAATATGATTTATGAAAAAATCCATTAATTAACTCCGAAAAAATAAATG  
TTAAAAAATAATATAGATATGATCTTTTATCATATAATTTTATTAATTATGAAGATAAGAAAAACTCATCTATTTTATGGA  
TTACCATTACAAGTAAATAATAACCAAGAGATTTTTTATAATTATACCGAACATAAACGAAAAATTTTAAATATGCTGGT  
AGGTATCCCTATCAATAATTATCTAGTAGAAGATAAATTTATAGATATAAAAAGAACAAATCCGGATAGAAAAAATTTTCGATT  
GGATAATTCTCAATTTTTGTCTTAGAAAAGAAAATGGATATTAGGGCCTGGATCAATATGGATACTGACGCCAACAGTAAT  
AAATATACTAAACCTAGGGCTAATAATTATCAAAATAATTGATAAAAATCGACAATAAAGATCTTTTTTATCCACGATTCA  
TCAAAATCAAGAAATGAATCCATCCAAAAAATACTTTTTGATTGGATGAGAATGAATGAAGAAATACTAAGTTGTCCCA  
TATCGAATCTCGAATTTGGTTTTTCCAGAAATTTTTGATACTTTATACTTCGTATAAGATTAACCATGGTACATACCA  
ATCAAATTTCTCCTTTTTAAATCTTAATGTAAATGAAAATGCCAGTGGAAATAAAAATAAAAAAACGACTGGAAAGAAAA  
AAGAGATATCTTTATATCAATATTTTCAAATGAAAAAATAATCTTGAATTAGAAAAACAAATCAAGTAGAAAAAGAAT  
ACGGAATCAAAACAGATTTTGAATCAACTCTCTCAAACCAAGAAAAAGATATTGAAGAAAATTATGCGGTATCAAAGATG  
AAAAAATAAAAAACAATCCAGGACCAACATGGAAGCGGAGTTTGTATTTCTTACTAAAAAGGTATTTGCTTTTTCAATT  
GAGATGGGACGATTCTTTAAATAAAAAAATGATCGATAACATCAAAGTATATTGTTCCCTGCTTAGACCGATAAACCTAA  
GAGAAATTAATAGCCTCTATTCAAAGGGGAGAAAATAAATCTGGATCTTCTAATGATTCAGAAAAATTTTCATTCTTACA  
GAATTGATTA AAAAGGGAATATTACTTATTGAACCAGTTCGTCTGTCTAGAAAAAATGAAGGACAATTTA

Nandina GCATCTAGCATTGGGTAGACCTCATAACAATAACTGTCTAGTTCTACCGTATCTTTTTGTTTCAT--  
----TTCTTCTGGAACAATCACAAACACTTTTTTTGAT-----TATGGATCTACTACC-----

AGAAATTC AATGCGTAATCTCAGCATTCAATGTGTATTCTGAATAATCTCATTTTTTCAATTATTCAACCATTTTCATTTT  
ACCAAGTCCAACGTTAGCCAGATTAGTCAACATTTATATGTTTCGATGCAACAACAAGATGTTATTTGTAACAAGTAGTT  
TTGTTGGTTGGTTAATTGGTACATTTTATTGATGAAATGGGTTGGATTGGTATTATTCTGGATACGGCAA---  
AATCGT-----TCT-----ATTAGATCGAAT-----  
----AAGTAC-----

CTTGTGTGAGAATTGAGAAATTTCTATGGCTCGAATTCGAATTTTTTAGTATTCTCTTATTTATCACCTGTGTCTACTATTT  
AGGC-----AGAATACCGTGCCTATT-----

GTCATAAAAAACTGAAAGAAACCTCAAAAACAGAAGAAAGGGAGGAAAGTGAAGGAAGAAACAGATGTAGAAATAGAAAC  
AACTTCCGAAACGAAGGGGACTAAACAGGAACAAGAGGGAGCCGCCGAAAAAGAAGTTAAAGATGATAAAGACCTTTTTCT  
GGTTTTGAAAAACCTCTTGTGACTCTTCTTTTCGACTATAAACGATGGAATCGTCCATTGCGATATATAAAAAACGAGCGA  
TTTGAAAATGCTGTAAGAAATGAAATGTCACAATATTTTTTTTTATACATGTATAAGTGACGGAAAACAAAGAATATCTTT  
TACATATCCACCCAGTTTATCAACCTTTTTTGAATGATACAAAAAAGTTGTTTTTGTGCACGACAGAAAAAATATCTT  
CGGAAGAGTTGTATAATCACTGGGCTTATACCAATGAACAAAAAAGAAAACAACCTGAGCAAGGAATTTATCAATCGAATT  
GAAACTCTAGACGAGGGGCTCTTTGATCTGGATATACTCGAAAAAAGACTAGGTTGTGCAATGATGAGAATGAACAAAA  
ATGCTTACCTAAAATATATGATCCTTTTTTGAATGGACCCCATCGCGGAACAATTCAAAATTTGTATTACACTCAAGCA  
TGAATAATCTTTTAAATCACCTCAATAAAAAGATTCCATAAAAACCTTTTGGATAAATAAGTATCAAGGTATCCTTGATACT  
GATTGCCGAGAATTTGAAAAAGAATTTGCAGAGGAGCCAATGCCTAATTTGAATTTAAAAAGCCCTTCTCACAGGGAAA  
ATTTTATTTCCGAAAATCAATCGAAAAATTTCTTCGATGCAGCTACAACGTATCCTAACGATCAAACAATTATAGATATAG  
AAGAATCTCTTGAAATAAATGAAATCAAAAAACCGTTTCTCGATGGTTATACAAATTAACCGACGATTTAGAAGAAGAG  
GAGATAGAAAAATGACGAAGAGTCAAAACCCAGATCACGGTATTCGTTTACGAAAAGCAAACGTGTAGTAATTTTTTACTGA  
TAACGAGAAGAATCAGAATACTCCTACTAGTACTACCGAGACTACTAGTACTGCCGAGACTACTAGTACTACCGAGACTA  
CTAGTACTACCAAGAATACTAGTACTACCAAGAATACTAGTACCACCGAGACTACTAGTACTACCGAGAATGAGAATACT  
AGTAACCAAGATCAATCAGACGAAGTGGCCTTGACGCGTTATTTCGCAACAACCAGATTTTCGTCGAGATCTAATCAAAGG  
ATCCATGCGCGCTCAGAGACGTAAAACAGTTACTTGGGAAGTGTTCAGCAACAGTGCCTTCCCCACTTTTTTTGGACA  
GAGTAGACAAAACCTTTTTTTTTTTCTTTTGTATATCTCCGGAACGCTGAAATATTTTTTTCAGAAATTTGGATGGGGAAAGAC  
GCAGAATTCAAAATTTTGAATTTCTGAAGAAGAAGATACAAAAGAAAAAGAGAAAAAGAGGGAGGAGAAAAGACAGGAGAA  
TGAACGGATAAGAATATCAGAAACTTGGGATACTATTATATTTGCTCAAGCAATAAGGGGTTATATGTTAGTAACCCAAT  
CGATTCTTAGAAAAATATATAGTATTGCCCTCGTTGATAATAGCCAAAAATATTGGGCGTATGTTATTATTTCAATTCCCC  
GAGTGGCAGCAGGATTTGAAAGCGTGAATAAAGAAATGCATGTTAAATGCACTTATAATGGTGTTCATTGTCAGAAAA  
AGAATTTCCGAAAAATTTGGTTAACCGACGGTATTTCAGATAAAGATCCTATTTCTTTCTGTCTGAAACCTTGGCACAGAT

CTAAAGTACAATTCGATCATAGAGATCCAATGAAAAAGAAAGGAAAACCAGAGAATTTTTGTTTTTAAACGGTTTGGGGA  
ATGGAAGCTGAACTACCGTTTTGGTTCTCCCCGAAAACGACCTTCCTTTTTTGAACCCATCTGGAAAGAAATTGAAAAAA  
CATTATAAAAATGAAAAAGAAATGTTTTATAGCTCTAAGAATTTTAAAAGAAAAGAACAAAATGGTTTATAAGGGTTTCAA  
AAGAAAAAACACGATGGGTTATCAAAAATATTTCTATTTATAAAAAAGAATAATGAAAGAACTTGCAAAAGCAAAAGTAAGT  
CCAATTCATTATTTGGTTTGGAGGAAATAGATGAATCAAGTATAAATACAAATCAAAAATATTATATAAATATTTAAAG  
TAATCAGATTATTCACGAATCTCCCATTGCAATTAGATCCCTGGATTGGATAAATTATTCATTGACAGCAAAAAAATAA  
AAGATGTGGTTGATAGGACAAGTACAATCAGAAATCAATCGAAAAAATCACAAAAGACAAGAAAAAATTATTTCTAACT  
CCTGATAGAAACATTAATCCTAACAAAATAGGTTGTGATGATAAGGGATTAGAATCGCTGAAAAAATTTGGCAGAAATT  
AAAAAGAAGAAGTAACCGATTAATACGCAAATGTTACTATTTTTTGAATTTTTTATTGAAAGGATATACACAGATATCC  
TTTTTGTATCATAAATAGTCTCAGAATCAAAGTCAAACCTTTTTCTTGAAGCAAAAAACAACTATTTTTATAAAAAATAGT  
TCCAACGATGAAACAAAATAAAAAGGGAATTGATGAAACAAAATCCAAATACAATTCATTTTTATTTTCGACTATAAAAAAGTC  
ACTTTCTAATATTAATAATAGTAATAATAAATTCACAAATTTTTGTGACCTTGACTCCTTGTACAGGCATATGATTTTT  
ACAAATTTATCACAAACCCAAGTTTTTAAACAAGTATCACTTGAGATCTGTACTTCAATATCGCGGAACACTTCTTTTTCTT  
AAGGATAGAATAAAGGATTCTTTGGAACACAGGGAATATTTTCATTGCGAATCAGGACATAAGAACTTCGCAATTTTAG  
AATGAATGAATGGAAAACTGGTTAAGAGGCCGTTATCACTATCAATACGATTTTTTCTCAGACTCGATGGTCTCGATTAG  
TACCGCAAAAATGGCGAAATAGAATCCATCAAAGATGTATGGTTCAAACCTAAAACTCAACTTATTTCGGATTTATATGAA  
AAAGACCAATTAATTCATTACGAGAAACAAAATAATTATGCAGTAGAGTTGAATCAAAAAGATAAATTTAAAACTATAA  
ATATGATAAATATGATCGTTTTATCACATAAATATATTCATTATGAAGATAAGAAGGACTCATATATTTATAGATCGCCGT  
TACAAGTAAACGAGGCCAAAGAGTTTCTCTATAATTACAACACGTATAATTACAGTACATATAATCCTAAACTCTTTTTT  
ATGTCGGGAGATATATCTCTTAATAATTATCTAAGAGAAGACTCTGATACGGAAAAAATCTGGATAGAAAATATTTTGA  
TTGAAAATTTTTAATTTTTGTCTTAGAACAAAAATTGATATTGAGTACTGGACCAATATGGATATCGGGGCCAACGTTA  
ATAAAAAACTAAGACTCAGACTAATTATTATCAAATAATTGATAAAAAAGATCTTTTTTCTATCGCAATTCATAAACAA  
ATCAACCCAGCCAAACAAAACAAAACCTTCTTTTGACTGGATGGCAATGAATGAAGAAATACTAAATTTGCTCTATATCTAA  
CCTAGAACTTTGGTTTTTCCCAGAAATTTGTGTCAATTTTATAATGCCTATAAGATTCAACCGTGGACCATAACCAATTAATT  
TACTTCTTTTAAATTTTAAATGGAAATGAGAACGTTAGTGAAAAACAAAATATTAATGGAAAGGAAAAAAGGATCTTCTCT  
ATATTATCTAAATCTAATCAAAAAAATCTCTTGAATTAAAAAATAAAGAAGAAAAAAGGAAAGCCAGCCCAAGAAAATAT  
TGGATCAGATACACAAAAACAAGGGAATCCTGGATCAGATCCATCAACCCAACAAAAGGATATAAAAAAATGTTAAAG  
AAGATTATGATGGAAGATCAGACATTCAAAACGTA AAAAAGAAAAAGCAATCTACGGGCAACATAGCAGCGGAATTAGAT  
TTATTCTTGAAAAGATATTTTTCTTTTTCAATTAAGATGGGATAATCCTTTGAATAAAAAAATAATCAATAATGTCAAAGT  
CTATTGTCTACTGCTTAGACTAAAAAATCCAAAGGAAATTGCTATAGCCTCTATTCAAAGAGACGAAATGAGTTTGGATG  
TAATGCCGATTTTGAAGACTCTAACTCTTGCAAAAATTAATAAATAAAGGAATGTTGATTATTGAACCTGCTCGGTTATCT  
ATAAAAAGGGATGGACAATTTCTTTTGTATCAAACATAACTATTTTACGGGTGCATAAAAAATAAGCACC  
Nicotiana GCATCTAGCATTGGGTAGACCTCATAACAATAACTGTCCTAGCTCTACCATATCTTTTTGTTTCAT--  
----TTCTTCTGGAACAATCACAAACACTTTTTTTGAT-----TATGGATCTACTACC-----

AGAAATTC AATGCGTAATCTCAGCATTCAATGTGTATTCTGAATAATCTCATTTTTTCAATTATTCAACCATTTTCATTTT  
ACCAAGTTCAATGTTAGCCAGATTAGTCAACATTTATCTCTTTTCGATGCAACAGCAAGATCTTATTTGTAACAAGTGGTT  
TTGTTGGTTGGTTAATTGGTACATTTTATTCATGAAATGGCTTGGATTGGTATTAGTCTGGATACGGCAA---  
AATCAT-----TCT-----ATTAGATCGAATGTACTTATTTCGATCTAAT-----  
----AAGTAC-----CTTGTGTTAGAATTGAGAAATTTCTATG-----  
GCTCGGATCTTTAGTATTCTTTATTTATTACCTGTGTCTACTATTTAGGC-----AGAATACCCTCACCCATT-----  
-CTTACTAAGAACTAAAAGAAGCCTCAAAAACAGAA---GAAAGGGTGGAAAGTGAGGAA-----

GAAAGAGATGTAGAAATAGAAACAGCTTCCGAAATGAAGGGGACTAAACAGGAACAAGAGGGATCCACTGAAGAAGATCC  
TTATCCTTCTCCTTCCCTTTTT---TCGGAAGAAAGGTGGGATCCGGACAAA---  
ATCGATGAAACGGAAGAAATCCGAGTGAATGGAAAGGACAAAATAAAGGATAAATCCACTCTCACCTTACAGAGACAGG  
CTATAATAATATTAATACTAGTAATAGT-----  
CCAATTTATGATTATGAGGATTCTTATCTGAATAATAATAACACGGGGAATACAGAAATTTTTAAATTGCAACTGCTTGA  
TAAA-----  
AAAAATGAAATAAAGACCTCTTCTGGTTTCAACAGCCTCTTGTGAGTCTTCTTTTTCGATTATAATCGATGGAATCGACC  
ATTTTCGCTACATAAAGAATAAT-----CGATTTGAA---CAGGCCATAAGA-----  
ACGGAAATGTCACAATATTTTTTTAACACATGTA AAAAGTGTGAAAAACAAAGAATATCTTTTACATACCCGCCAAGTTT  
ATCAACTTTTTGGAAAATGATAAAAAGAAGG---ATACCCTA---TTGTCACTCCAAAAAACACTCCCTAATGAA---  
CTGGACAATCAGTGGATTTCTACCAACAAAGAAAAAGTAAT-----  
AATCTGAATAAGGAATTTTTTAAATCGACTTGAAGTTCTAGACAAGGAATCTTTTTCTCTCGATATACTTGAACAAGGAC  
TAGATTGTGTAATGATGATACTAAAAAAGAA-----  
TACGTGCCTAAAATGTATGATCCTTTGTTAAATGGACCATATCGAGGAACAATCAAAAAAAGTTTTTACCTTCAATCAT



AAACAAT-----ACTTCG---  
CTAGAAAATTTGAAAGAGAGGGTTAGAATAAATAGGATTTCATACTATCTTTCTTCCGAATACTGAT-----  
TACCAAGAATTGGAACAAAAAGTGGATACGGTTGCTAAAAAACATTATCAACAGAAATT---  
GACGAGTTCTTAACTTTAATCAATGAATTTGGTAACGAACCAAAATCGAGTTTAAATTTG-----  
AAAGACCTTTCTTTATTTTCAGACCAAGAACAGGGAAGAGTGAATTCAGAAAAAGAACTAAATTTGTAAAA-----  
-----TTTGTATTCAATGCAATTGCTCCTAATGGGACA-----  
ACATCTGAAAA-----  
AAATCGATTGGAATAAAAGAAATCAGTAAAAAATACCTCGCTGGTCCACATAAATTAATCACCGAATTG-----  
GAACAACAATCGGGTGACTATCAAGAGGGC-----  
GTACCACTGGATCATCAAATTCGTTCAAGAAAAGCCAAACGTGTAGTGATTTTTACTGCCAACAACCAGAATAACGATCC  
TGATACCAAAGATACTGATACCGCA-----GATCAA-----  
-----  
-----GATCAAACAAAGGAA-----  
GTGGCTTTAATACGCTATTCGCAACAACCAGATTTTCGGCGAGGTATAATCAAAGGCTCTATGCGGGCTCAAAGGCGCAA  
AACAGTTATTTGGAACTCTTTCAAGCAAATGTGCATTCCCCCTTTTTCTTGACAGA---ATAACC---  
CCCCCTTTCTTTTT---TCTTTT---GATATCTCTGGACTGATTAA-----CCAATTTTTCGAAATTGGTCAGGT--  
-AAAGAAGGAGAATTCAGATTCTAGAGTCTAGAGAAGAACAACAAAAAGAGAAGAGAAAAAGGAAAAGGAC-----  
-----AAAAAGGGGAGAACAAAAGA-----  
AAGGAAAAAGCACGGATAGAGATAGCAGAAGCCTGGGATACCATTCTTTTGCGCAAATAATAAGAGGTTACATGTTAAT  
AACTCAATCAATTCTTCGAAAATATATTGTATTACCTTCATTGATAATAGCCAAAAATCTCGGGCGTATGTTAGTCTTGC  
AACTTCTGAATGGTCTGAAGATTTGCAGGAATGGAATAGAGAAATGCATATTAATGTACTTATAATGGTGTTCATTA  
TCAGAAACAGAATTT---  
CCAAAAAATTGGTTGAAAGATGGCATTTCAGATCAAAATATTATTTCTTTTTGTCTGAAACCTTGGCATATATCTAAACT  
GTACTCTCCCGT-----GGAGAGCTAATGAAAAAGAAAAA---CAA---  
AAAGATGATTTTTGT---TTTTTAACAGTTTGGGGAATGGAAGCTGAACTTCCCTTT---  
GGTTCTCCCCGAAAACGCCCTTCTTTTTTTGAGCCATTTTTAAGGAACTCGAAAAAAAATTTGGAAAA---  
TTCAAAAAGAAATATTTTATAACTCTAAAAGTTTCAAAGGAAAAATAAAATTTATTTTCGA-----  
AGAATTTCAAAGAAACCAAAAAATGGCTTATCAAAGTAGTCTA-----TTTTATAAAAAAATGAAAAA--  
-GAACTTTCAAAGTAAAT-----CCAATTGTATTATTTAGACTCAAAGAA-----  
ATAGATGAATCGAATGAAACGAAAAA---GAAAAAGATTCT-----CTAATGAGT---AATCAG-----  
-ATAATTAACGAATCATTTAGTCAA-----ATTGAATCTGGAAATTGGCCAAATTCT-----  
TCACTGATAGAAAGCAAAATGAAG---GATTTGACTGATAGAACAAGTACAATCAAAAATCAAATAGAAAGAATT-----  
-ACAAAAGAGAAAAAGAAA-----GTAACTCCAGAA-----ATAGACATTAGTCCTAATAAAACAAAT---  
AATATTAAAAAATTCGAATCGCCAAAAAGATTTTCCAAATATTA---  
AAAAGAAGAAATACTCGATTAATATGGAAATTCATTATTTTCTAAAATTATTC-----  
ATTCAAAGATTATACATCGATCTATTTTTATCTATCATTAA-----  
ATTCACAGAATTAATACACAACCTCTTTCTTGAATCA---ACAAAC-----  
AAATTGATTGATAAATACATTTCCAAT-----AATGAAATAAATCAAGAAAAAATTAAT-----  
AATCAAAAAAATTCACCTTTATTTTCGACTATAAAAAAG-----TCACTTTAT-----  
AATATTAGTAAGAAAAATTCACAT---ATTTTTTTT---  
GATTTATCTACTTATCACAAGCATATGTATTTTACAAATTATCACAACCCCAAGTTATTAATTTG-----  
TCTAAATTAAGATCTGTTCTTCAATATAACAGA-----ACGTCTTTTTTCTTAAAGACTAAAATAAAGGACTATTTT--  
-----CGAACACTAGGAATATTTTATTCTGAATTAACAT-----AAGAACTTCAG-----  
AGTTATAGAATCAAT-----CAATGGAAAAACTGGTTAAGA-----CGGCAT---TAT---CAATAC---  
GATTTATCTCAGATTAGATGGTCTAGATTAATGCCACAAAAATGGCGAAATAGGGTTAATCAAGGTTGTATGGCTCAAAA  
TCGAAATTTAAACAAA-----TGGAATTCATATGAA-----AAAGACCAATTAATTCATTACAAAAAAGAAAAT-----  
--GATTCTGAGCTCTATTCATTAGCAAAC---CAAAAAGATAATTTT-----  
CAAAAATGTTATAGATATGATCTTTTAGCATATAAATCGATTAAT-----TATGAAAAAAAATGACTCTTTTATT--  
----TCTAGATTACCCTTTCAAGTAAATAAG----

Nuphar  
GCATCTAGCATTGAGTAGACCCCATACACTAACTGTCTAGTTCTACCGTATCTTTTGCTTCATTTCTTGTCTTCTGGA  
ACAATCACAATCCCTTTTTGAT-----CATAGATCTACTCAC-----  
-----  
GGGAATTTTCAATCCCAACCTTAGCATTCAATACGTATTCCTGAATAATCTAATTTTTCAATTATTCAACCATTTTATTTT  
ACCAAGTTCAACATTAACCAGATTAGTCGACATTTCTATGTTTCGATGCAACAATAAGATATTATTTGTAATAAGTAGTT  
TTTTTGGCTGGTTAATTGGTCACATTTTATTGATGAAATCTATTGGCTTAGTATTATCTTGGCCATGGGAA---AAA---

-----ATGAGATCTAATGCACCTTTTTAGATCTAAT-----

AAGTAT-----CTTGTGTCAAAATGGAGAAATTCTGTG-----

TCTCAAATCTTTAGTATTCTCTTATTTATCACCTGTGTCTGCTATCTAGGA-----AGAATGCCATCACCTATT-----

ATAACTAAGAACTGAAAGAAAGTTCAAAGGGGGAAAGAAAAGAAACTGAGAAAAGAAAGAGATGTAGAAATGGAAAC  
AATTTCTAAAACAAAGAAGATAGAACAGGAAGAAGAGAGATCCGTGGAAGAAGACCTTTCCATTTCTTTGGAAGGAAGGT  
GGAATCCTTATAAGATATATGAAACAGAGGAAATCCGGCTGAATGGAAAGGAAAAAGATGAATTCGGCTTTAAAGAGAAA  
GAAAAGAATGAACTCTTATGGGTTGAAAAATCCCTTCTGTCTCTTCTTTTCGATTATCAACGATGGAATCGACCCCTGCG  
ATATATAGAAAACGATCGATTTTCAAATGCTGTAAGAAATGAAATGTCTCAATATTTTTTAAACACATGCGCAAGTGATG  
GAAAACAAATAATATCTTTACATATCCACCCAGTTTGTCTACTTTTTTTGAAATGATACAAAAAAGATAGTATTTTCGC  
ACAGCGGAAAAACTACCTGCGGAGGACCTGTCTAATGAATGGGTTTTCGACCACTGAAAAACAAGAGATAACTTAAGGAA  
CGAATTCATAAATCGAATAGAAGCTATAGACAAAGGATCTCTTATCCTCGATGTGGTCGAAAAAAGGGCCAGATTGTGCA  
ATGATGAAGAGGAACAAGAATGCTTACCTAAGTTTTATGATCCTCTTTTGAACGGACCTATCGTGGAAACAATCAAAAA  
GGGTATTTATATTCAATTAGGAATGATTCAATCACCTCCATACAGGGGTCTACCAAATTTCTTGGATAAATAAGATTCA  
TGGTATCCTTTCCAAGGATTATCGAGAATTTGAACACGAAATATATAAACTTGATGTAAATCATCATCTGCAGGCATTG  
ACGATTCATCAGTCTCAATTGGTGAATTTACAGAAGAAGCTGAAGAAGCTGAGGAATCAAGAACTCGTTTCAAACAATTT  
GCTTTTTGGGGAGAAGAAAAAGAAATTAATTCAGAAAATCAAGCAGAATTTCTATTTCGATATGGTTAGAGCTGATCCGAA  
TGATCAAAAAATTAGTAATCAATCAATAAAAAATTGAAGAAATGAAGAAAAAGGTTCTCGATGGTTATACAACTGACTG  
CCGATTTTGATTTTGAAGAAGAGGAGGAGGAGGAAGAAGAAGATGATGAGGAAGAACCACAGATGATCACGGGATT  
CGTTCAAGAAAAGCTAAACGTGTGGTAATTTATACTGATACTGATACCGATGAGGATACTGATACTAATATTATTAATAC  
TACTGATAGTGATCAAGCAAAAAATAGTGATCAAGCAAAAAATAGTGATCAAGCAAAAAAAGTGATCAAGCAAAAAATA  
GTGATCAAGCAGAAGAACATGAGATGGCCTTGATACGTTACTCGCAACAATCGGATTTTCGTCGGGATATAATCAAAGGG  
TCGATGCGGGCTCAAAGACGTAAAACAGTGACGTGGGAAATGTTTTCAAACAGATGTGCATTTCCCCCTTTTTTTGGACAG  
AATAGACAAAACACCTTTGTTTTCTTTTGATATCTCAAGGATGATGAACCTAATTTTTAGGAATTGGATGGAGGAGAAAA  
GCCTAAAATTA AAAAGAAAAACGTCTGATTATGCGGGCGAAGGGGCAAAAAGAGGAAGAACATGAAGAAGAAAAAGGGAG  
TATAAAAAGAAAAGAGGATAAAAAGACAGGAGGATGAACGGATAGCAATAGCAGAAGCTTGGGATACTATTCCATTTGCTCA  
AGCAGTAAGGAGTTCCTATTAGTAACCCACTCGATTCTTCGAAAATACATCGTATTACCTTCATTGATAATAGTTAAAA  
ATATTGGTCTGATGTTATTATTTCAATTCCTCGAGTGGTATGAAGATTTTAAGGAATGGAGTAGGAAATGCATGTCAA  
TGCACATATAACCGTGTTTCAATTCGAAAACAGAATTTCCAAAAGACTGGTTAACAGAGCGTATTACAGATAAAAACTCT  
ATTTCTTTCTCTCTGAAACCTTGGCGTAGATCTAAGCTACGATCCCATCATAGGGATCTAAGAAAAAAAACAAAAAAT  
TCTGTTTTTTAACGGTCTGGGGGGTGGAAACAGAACTGCCCTTTGGCTCTCCCGAAAAAACCTTTCTTTTTTGAACCC  
ATTCATAAAACACTCGAAAAAAAATTAGAAAAGTAAAAAAGAAAGGTTTTTTTCATTTTAAAAATTCTAAAAGACAACAT  
AAAAGTTTTCTAGAGATTTTCAAAGAAAAAATAAGATGGGTTATCAAAATAGTTCTATTTATAAAATCAAAGTCATTT  
TCTTTTTTAGATTGACGCGAGTCTTTGACCCAATTCCAAATAATAAAGATTCCAAAATAAGTAATAGGATCATCCATGAA  
TCACCCATTAGAATTGGGTCCAGAGATTGGGCAACGATTCACTGACAGAAAGAAAAATTAATGATCTGGCTGATAAGAC  
AATCAAATCCGGGATCAAGTAGAAAAGATTATGAAAGACAAGAAAAAATAAACGGAATCACAGAAATATATTTGGC  
AAATATCTAAAAAAGAAGTGCCCGATTAATTCCTAAATGGAACCTTTTTATGAAATCTTTCATTGAAAGAATATACATG  
GGTATCCTTCTATGTATCACTAACATTTACAAGATCAATGTAAAATTTTTTCTTGACTCAACGCTTGACTCAACAAAA  
AATTCTAAATAGATACACTTACAATGACGAAACAAAAGAAAAGGATACTAATGAAACGAATCCAAATATAATTCCTTCA  
TTTTCGACTATAAAATCTTTTTCTACTTATACTACTACTATTAGTAGTAATAGTCATTACCCGATTTATTGCGACTTATCT  
TCTTTGTCCCAAGCCTATGTGTTTTACAAATTATTGCAAACCAAGTTAGTAACAAATATAAGTCAGAATCCATATTTCA  
ATACTACAGAACATATCCTTTTATTAAGGATAGAATAAAAAGACTATTTCCATAACTATTTCCATACACGAGGAATATCTG  
ATTCTGAATCAAACACAAGAACTGCGGAATTCTGGAATGAATGAATGGAAAACTGGTTAAGGAACCATTATCAATAC  
AATTTATCCCGTGCCAAATGGTCTGGATTAGCACCTCTAAAATGGAGAAATAAAGTCAATCAGCATCGTACGATTA AAA  
TAACGACTTACAAAAATTGGATTCATATGAAGAAAAAGACCAATTAATTCATTACAGAGATAAAGGATTTTTATAAATTGG  
GCTTATTAAGAGTCCGAGTCACACAAAAAAAATGAAAAACACTACAGATATGATCTTTTATCATATAAATATATTAAT  
TATGAATATGTGAAAGACTCCAATATTTATGGATCACCATTACAAGTAAACAGGCATGGAGAGATTTTATCTCTATCTAA  
TTACAATACACATAAATACAAATCGTTTTATGTTATAACTATTAATGATTGCTTAGAAGATAAATATATAATTGATACGG  
ATCAAATCTAGATAGAAAAATTTTTGAATTGAGAATCATCTATTTTTACCCTAGAAACGATATTGAGACTAGGACCAGT  
ACGGATATTGGAACCTTCACTAAAAAAAATAAACTACTAAGACTGGGACCAATAAGAAAGATCTTTATATCAGAATTCA  
TCAAGAAATCCAGACAAAGCAAAAAGAGTTCTTTTTTGATTGGATGGGAATGAATGAACAAATGTTAGATCGTACTATAT  
CAAATCTGGACCCTTGGTTCTTACCAGAATTTGTGCCACTTTATGATCGATATAGAATAATCCGTGGATCATACCAATC  
AAATTGCTTCTATTTGATTTTAAATGGAAATAAAAAAGTGATCTTTATATAGATCCAAAGGTCAAATCTAATCAAAAAGA  
AAGATCTAATCCAAAAGCAGAATCTAATCAAAAAGAATATCTTGAATTAGAGAATCGGAACCGGGACGAGAAAGAACGAC  
AGCACCAAGGAAATCTTATATCAGATACAAGAAACCAAAAAAAGATGTTGGAGCAAATTCACAGGTTTCAGATATTAAG  
AAACGCAGAAAGAAAAAGAAATTC AAGAGCAAGAAGGAAGCGGAACTAGACCTCCTTCTGAAAAAATATTTTTCTTTTTCA  
ACTGCGATGGGGTGATTCTTTAATCAAAGAATGACTAATAATAAAGGTATATTGCCTACTGCTTAGACTTATGGATC

CGAGTGAAATTGCTATATCCTCTATTGAAAGAGGAGAAATGGGTCTAGATGTAATGCTGATTGATAAGGATCTGTCTCTT  
CCAGAATTGATAAAAAGGGGAATATTTATTATTGAACCGTTTCGTTTGTCTACCAAATGGGATGGAATTT

Nymphaea

GCATCTAGCATTAAAGTAGACCCCATACACTAACTGTCCTAGTTATACCGTATCTTTTGTCTCATTGTTTGGTTCTTCTGGA  
ACAATAAGAAATCCCTTTTTGAT-----TATAGATCTACTCAC-----

GGGAATTTTCAATCCTAACCTTAGCATTCAATATGTATTCCTGAATAATCTAATTTTTCAATTATTCAACCATTTTGT  
ACCAAGTTCAACATTAACCAGATTAGTCGACATTTCTATGTTTCGATACAACAATAAGATTTTTATTGTAACAAGTAGTT  
TTTTTGGCTGGTTAATTGGGCACATGTTATTGATGAAATGTATTGGCTTAGTATTATCTTGGCCATGGGAA---AAA---

-----ATGAGATCTAATGCACCTTTTTAGATCTAAT-----  
AAGTAT-----CTTATGTCAAAATGGAGAAATTTCTGTA-----  
TCTCAAATCTTTAGTATTCTCTTATTTATCATCTGTATCTGATCTAGGA-----AGAATGCCATCACCCATT-----  
-ATAACTAAAAAACTGAAAGAAAGTTCAAAAAGGGAA---GAAAAGAAGAAAACGGAAGAA-----

-----  
GAAGGAAATGTAGAAATAGAACGAGTTTCGAAAACAAATAAGATAAAAACAGGAAGAAGATGGATCCGTGGAAGAAGACCT  
T-----TCCATTTCTTTGGAA---  
ATGGAAGAAAGGTGGAATCTTTACAAGAAGATATATGAAACAGAGGAGATCTGGCTGAATGGAAAGGAAAAA-----  
GATGAATTCGACCTG-----

-----AAA-----  
GAGAAAGAAAAGAATAAACTTTTAGGGATTGAAAAATCCCTTCTGTCTCTTCTTTTCGATTATCAACGATGGAATCGACC  
CCTGCGATATATAGAAAATGAT-----CGATTTTCA---AATGCTGTAAGA-----

AATGAAATGTCTCAATCTTTTTTTTATACATGCGCAAGTGATGGAAAGCAAAGAATATCTTTCACATATCCACCTAGTT  
GTCTACTTTTTTTGAAATGATAAAAAAAG---ATGTCTTTT---CGCACAGCAGAAAAACTACCTGCGGAGGAC---  
CTCTCTAATGAATGGGTTTCGACCACTAAAAACAAAGAGAT-----

AACTTAAGGAACGAATTCATAAATCGAATCGAAGCTATAGACAAAGGATCTCTTATTCTCAATGTGGTCGAAAAAAGGGC  
CAGATTGTGCAATGATGAAGAGGAACAAGAA-----  
TGCTTACCTAAGTTTTATGATCCTCTTTTGAACGGACCCTATCGTGGAACAAGAAAAAAGGGTATTTATATTCAATTAG  
GAATGAT-----

TCAACTACCTCCACACGGGGTCCACCAAACCGCTTGGATAAATAAGATTGATGCTATCCTTTTTTCCAAGGATTATCG  
AGAGTTTGAACGAGAATTTGAACACGAAATGTATAAACTTGGCGTAAAATCATCATCTACAGGCATC---  
GAGGATTCATCAGTCTCAATTGGTGAATTTACAGAAGAAGCTGAAGAAGCTGAGAAATCAAGA-----

-----ACTCGTTTTCAAACAATTTGCTTTTTGGGGGAGAAGAAAAAGTATTCGAA-----  
-----AAAGTATTCGATATGGTTAGAGCTGATCCGAATGATCAA-----AAAATTAGTAAT-----  
-----

CTTCCAATTGAAGAAATTAAGAAAAAGGTTTCTCGATGGTTATACAAACTGACTTCTGATTTGGATTTTGAAGAAGAGGA  
GGAAGAGGAGGAAGAAGATGATCAGGAAGAATCCACGGATGATCACGGGATTCGTTCAAGAAAAGGCAAACGTGTAGTAA  
TTTATACTGATACCAATCAGGGTACTAATATCATTAACTACTAATAATATCATTAAAGACCCATGATAATATCATCAAG  
ACTACCAATGATAATATCATCAAGACTACCACTGATAATATCATTAACTACCAATGATAATATCATCAAGACTACTGATAA  
TATCATTAACTACCAATGATAATATCATCAAGACTACTGATAATATTATCAATACTAATGATAATATCATTAAAGACCACCG  
ATAGTAATCGAGAAAAAATAGTGATGATAAAGTCGAAAATGGTGATCAAGCGGAAGAAAATGAGATGGCCTTGATACGT  
TACTCGCAACAATCAGATTTTCGCCGTGATCTAATCAAAGGGTCGATGCGGGCTCAAAGACGTAACAGTGACTTGGGA  
AATGTTTCAAACAGATGCACACTCCCCCTTTTTTTTGTACAGA---ATAGAC---AAAACACCTTTGTTT---TCTTTT-  
--GATATCTCAAGGATGATGAAC-----

CTAATTTTTAGGAATTGGATGGAGGAGAAAAGCCCCAAAATGAAAACATCTTCTTATGTGGGTGAAGGGGCAAAAGAGAA  
AGAGAAAATAGAGGAAGAACACGAAGAAGAAAAGGGGAGTATAAAAAGAAAAGAGGATAAAAAGA-----

-----  
CAGGAGGAGGAACGGATAGCAATAGCAGAAACTTGGGATAATATTATATTTGCTCAAGCAATAAGGGGTTCCATATTAGT  
AACTCACTCGATTCTACGAAAATACATCGTGTTACCTTCATTGATAATAGTTAAAAATATTGGTCGATGTTATTATTTT  
AATTCCCTGAGTGGTATGAAGATTTTAAACGAATGGAGTAGGGAAATGCATGTCAAATGCACATATAATGGTGTTCATTA  
TCGGAACAGAATTT---

CCAAAAGATTGGTTAACAGACGGTATTAGATAAAAATCCTATTTCTTTCTCTGAAACCTTGGCATAGATCTAAGCT  
ACGATCCCATCAT-----AAGGAT---CTAAGAAAAAA-----CAA---AAAAAT---  
TTCTGT---TTTTAACGATCTGGGGGATGGAAACAGAAGTCCCTTT---

GGCTCTCCCCGAAAAAACCTTTCTTTTTTGAACCCATTGATAAAGCATTGAAAAAAAATTATAAAA---

GTA AAAAAGAAAGGTTTTTTCTTTCTAATAATTATAAAGACAACATAAAGGTTTTTATA-----

AAGATTCTCAACGAAAAAATAAGATGGATTATCAAATAGTTCTA-----TTTATAAAAATCAAAGTGAAG--

-GAAGTCTTTTTCTTTTTTGTA-----TTGAGGCGAGTCTCTGACCCAAGTCAA-----  
AATGAAGAACCAAGTAAAAATGAGAAA---GAT-----TCC-----AAAATAAGT---AATAGG-----  
-ATCATCCATGAATCACCCATTAGA-----ATTGTATCCAGAGATTGGACAAATGAT-----  
TCACTGATAGAAATAAAAAATTAAT---GATCTGGCTGATAAGACAACCAAAATCTGGGATCAAGTAGAAAAGATT-----  
-  
AGAAAAGACAAGAAAAAAAACCTCTAACTCCAGATATTGAGGATATAGATATTAGTACTAACAAGGGAAATTGTAGTAA  
TAAAAGAACCGAATCACGGAAACATATTTGGCAAATATCTAAAAAAGAAGAAGTGCCCGATTAATCTCTAAATGGGACT  
CTTTTATGAAATCTTTC-----ATTGAAAGAATATACATGAGTATCCTTCTATGTATCACTAAC-----  
ATTTACAGGATCTATGTACAATTTTTTCTTGACTCA---ACAAAA-----  
AAGACTTTAAATGGATACACTTACAAT-----  
GACGAAATAAAGGAAAAGGATACTAATGAACCAATCCCAATATAATTCCCTTCATTTTCGACTGTAAAATCT---  
CTTTCTACTTATACTACTAAT---ATAAGTAGTGATAGTAATTCACCG---ATTTACTGC---  
GACTTATCCTCTTTGTCCCAAGCCTATGTGTTTTACAAATTATTGCAAACCCAAGTTAGTAACAAA-----  
TATAAGTCAGAATCCATATTTTCACTACTACAGA-----  
ACATATCCTTTTATTAAGGATGGAATAAAAGACTATTTCCATGACTATTTCCATACACGAGGAATATTTGATTCTGAATC  
AAAACAC-----AAGAACTGCGG-----AATTCTGGAATGAGT-----GAATGGAAAAACTGGTTAAAG-  
-----AGCCAT---TAT---CAATAC---  
AATTTATCCCATGACAAATGGTCTAGATTAGCACCTCTAAAATGGAGAAAAGAAAGTCAATCAGCATCGTACGATTCAAAA  
TAACGACTCACCAAAA-----TCGGGTTTCATATGAAGAA---AAAGACCAATTAATTCATTTCAGGGAAAAAGGAT-----  
--TATTCTAAATTTGGGCTTATTGAAGAGT---CCGAGTCGCGAAATGAAGAGTCCGAGTCGCGAAAAAAAATA-----  
AAAAAACACTACAGATATGATCTTTTATCATATAAATATCTTAAT-----TATGAAGATGTGAAAGACTCCAACATT--  
----TATGGATCACCATTACAAGTAAACAGG----  
Oenothera GCATCTAGCGTTAGGTAGACCTCATACAATCCTTTTACTACTTGCACCGTATTTTTTCTTTTCAT--  
-TACTTATTTCAGCAATAGC-----  
GGTCAATGGCCGAGCCAGCGTTTTGCTTTCCCATTTGCTCACTAAGTCAATGCGGAATCGTAGGTTTCAATTGGTATTCTT  
GAATAATTTGCTTTTTCAATTATTCAGCCTTAGCTTGTGGGAAGGCCAATGTTAACCCGATTAAGCTACATTTATATCT  
TTCGATGCAACAATAAGATGTTATTTGTCCTAAGTAGCTTTGTTGGTTGGTTAATTGGTCATATTTTAGTCCTGAAATGG  
GCTGGATTGGTATTTGTTTGGCTACTTCAGGTT-----ATTAGATCGAAGACAATGAAGTAC-----  
ATTACATGTAATGTACTTATTCAGCGACT-----AAGTAC-----  
ATTATCGAAAAATGGCGAAATCTTTTGTGCTGGTTAATTTCGTGAGATTTTAGCCATGAAACAGGTTGAATCGGCATT  
AGTT-----AGGATA-----  
AAGAATTCTAAGTTATTAGACGATGCACGGTGGTGATAAGGGGTTCTTCGCTAATAAGCGGCCTAAAAATTAACATTCCG  
CTTTTATGCTAGGTTGATACTTCGTGGATTTGAGAATGTGTACGTGGGAGCAAAATTCAGACAGGATATGGAGCACCTCT  
TTAGTATTATCTTATTTGCTATCTTTCTTTTATATTTAGATCAAAACACCCCTTTTGTATGCAGACCCGGCCGACAAAAA  
TTACAACCTCAAAGAAAACCTATCGAACGAAACCCAAGCTGCCAGAGCAGAGAAGAACTTGAAGAAAGACTAACGAAAAA  
ATTCGAAGCGCAAAGGAGAGCGCAAAGGGCAGCACAAAGGCAAGCTCTGCAAGAATTCAAGCAAGGTGTGGTAGAAAGCT  
ATCTGGCAAAGCAAGTTGCGAAAGACGCGAATCAAATACAAGCTCAGAAAGACGAGAAGCAAATACAAGCTGAGCAAAAA  
GCGAGGCGAATCCGAGCTGAGCAAGTTGTGCAATACACATTTTGGCTAATCGAAGCTCAGCGAAGAGAGATGGAAATCGA  
AGCTGCGCGAGCTATGCAGGAAGCATATAAGGGAATGCTTGTGCTGCGCAAGAAGGATATGTGGAAGAGGGGGTGCAAGAGA  
AACAGAGGGGATCCCCGAAGAACTTATTTCTCCTTCGCCTATTTTTTCATTTCGGAAGAAAGGGAAGAGAATCCGAAGTTA  
TTAATATTGAAAGAAAAATATCAATATTGACAGAAAAAATATCAATATTGACAGAAAAAACGATTTATTCTCGTTTGA  
AATCCCTATTATCACTTCTTTTTTGACCCGCAAAAACCACTCCGTCCATTACGATATATAAAAACGTGTGCTGGCGTTG  
AAAAGGCTGTCAAAAATGAAATGTCACAATATTTTTTTTATCCATGCCGAAGCGATGGAAAAACAAAGACTATGTTTTACA  
TATCCACCCAGTTTGGCAACTTTCTGGGAAATGATACAAAGAAAAATGGCTTCGAGGTTCCACGAATCTATACTAAAGC  
TAAATGGCGGGCTCTTAGGGGGTCTGCTCCTGGGAGTTATAGACAGTGGATTTCTCGCAATAAAAAAAGAACAGCC  
TGAGTACAGAATTTCAAAATCGAATTCAACTTTAGATCAAAAAAAGTCTGCTAAATGTGCTCGCAAGAAGGAAAAGA  
CTAGCCTTCAAAATGTCCTCGAAACAAGGAAAAGGTTGTGTAATTATAAACTAAAAAGAATACTTGCCTGAAATAGC  
CGATCCTTTTTTGACCGGAGCGCTTCGTGGAAAGAGCGACCCTGAAGTCGACGATGGCGTAAGGAAGACAAGCGAGATAA  
AGGTTGTTTTCTAAAGAATAATATTACAATGGCAACGCTCGGAAATAAGAATGATGATGACTTGCGGGAAGAAAAAAT  
GCCATATCCCTACTAAGCAGGATGAAAAACCCGGTAAATAAGCTTACCTACTTTTTGTTAACGAGAGAGATTATCCCTT  
CGTGAACCGTTAGTAAATAGAATTAATGGCCCTGCAGTACAAAAAAGAAAAAATTTCCAAAAGCAAACAAAAA  
ACGTCAAAAGCAAACAAAAAACGTCAAAAGCAAACAAAAAACGTCAAAAGCAAACAAAAAACGTCAAAAGCAAACAA  
AACGAAATCAAAGAAAAGTAAACGAAATCAAAGAAAAGTAAACGAAATCAAAGAAAACAAACGAAAGCTACCCACG  
AGGAGTCAAATTCGGCGCAACCCCAAAAACCGAAATCAACCCACACGGAATCAGATTCGACGCAGCCACAATCGAAAAGT  
ATTCATTCGCCACAGGCTATAGCTATAGACCGCCATCTTTTGTGACATTCTTTTTTCATGCTTTTGTAAACGGAGCCCCAA  
AGAAATAAAAAAGCAGTTATTGAACTAGAAGAAGAAATCAATAAAAAAGTTCTTCGATGGTCATACCAATTAATCGACGA  
GTTGGAACAACCTGGAGGGAGCCGAGGGAGAGACTCAGTTCTCGGATCATGAGATTCGAATACTCCATTCAAACGTGTAG





AATGGGTCATATCGTGGAACAATCAAAAAAAAAATTTTCACCTTCAATCAGAAATAAAATTTTCGTTAGAAAATTTTCATAGA  
GACAATGGAAATAAATAAGATTTCATAATCTCCTTCTTCTGATACCGATTACCAAGAGTTTAAACAGAAAATAGATCCAT  
TTGATAAAAAAAAAAGATTTTCAACAGAAATTAGTCATTTATTTACTTTAATCAGTAAATTTGATAGAGAATCAAGATCG  
GGTTTAAATTTGAAGGGCCCTTCTTATTTTTAGAAAACGAAGCAAACTTCTAAAATTTTTGTTAAATGCAATTATAAC  
TATCGCTAATGGTCCAAAATAAAACAAAAATCTTTTTGGAATAAAAGAAATAAGTAAAAAAGTCCCTCGATGGTCAGACA  
AATTTATTACCGAGTTGGAACAACAGACGGGCGTAATTCAAGAAGGCGTACGGGTGGGCCATCAGATTCGTTCAAGAAAA  
ATTGACGATATAGTAGTTTTTACTGATAACAAATGGAATTCTAAAAATCGTGATAAAATAGACCTGATATATACGATAGA  
ATATTTGCAAGAATCGGATTTTCGTGAAACATAATCAAAGGTTCTATGCGTACTCAAAGGCGTAAAATCTATTATTTGGA  
AACTGTTTGAAGCAAATGCGCACTCCCCGCTTTTTTTGAACAGAAGAAAAAAATCCCCCTTTTTTCTTTTGATATCTCC  
GAATGATGAACTTATCTTTAGAAAATTGGATGGGTAAAGGGGCGAGAATTTAAAGATTATACAGAAGAACAGACAAAAAG  
AAGAGAGAAAACAAGAGGAGAACAACATAAAGGAAAAAGTGCGGATAGAATGCCGGAATCTGGGATCTCGTTCCATTTT  
CGAAAAACAAGAAGTTTGTCTATTAATAATTCATCGATGCTTAGAAAATATATTATATTACCTTCATTGATAATAGTT  
AAAAATATTGGGCGTATCTTATTATTCCAACCCCTGAGTGGTCTGAGGATTTCCATGAATGGAAGAGAGAAAAAGCATAT  
TAAATGTACCTATAACGGTGTTCATTATCAGAAACAGAACTTCCCGCAAATTTGGTTAACAGAAGGTATTTCAGATAAAAA  
TACTATTTCCCTTCTGTTTGAACCTTGGTACAGATCTAAGCCTAAGTTGCGGCCCTCTTATAGAGATCTAAAAAAGAG  
CAAAAAAAGATGATTCTTGTTTTTAAACGGCTAGTGAATGGAACTGACCTTCTTTTTGGTTCTCCCCGAAAAAGAAC  
TTCCTTTTTTGGAGCCATTTTTAAGGATTTTCTAGCTCTAAGAGTTTTAATAAGAAGAACAAAACATTTTTCTACAAGGTT  
CAAAAGAAAACAAAAGGGGGTTTTATCAAAAACGTTTTATTTCTGTTTTCTAAAAAGAATAAAAAAAGAGCTCTCAAAAGTA  
AATCCAATCTATTTAGATTGAAAGAAGTATATGAATCCGGTGAACCTAACCAAGAAAAAGGTTCTATAATCAGCAATCA  
GACAATTCATAACTCGTTTAAATAAAATTCGATCTACAGATAATTATTCCCGAGAGAAAAAAAATTTAAAAATTTAACTG  
ATAGAACAAGCCCAATCAGAAAGAAAATAAAGAGTATTACAAAAGAAAAAAGGAACTCCAGGAATAAAGAGTAGT  
CCTAATAAAGAAGTTATAATGTAGAATCGCCAAAAGATATTTGGCAAATATTAAGAAGAAATACTCGATTAATCTG  
GAAATTACAGGTTTTTCTAAAAATTTTTATTGAAAAATATACATAGATATCTTTCTATATATCATTAATATTGCCAGAA  
TGTATACACGACTTGTCTTGAATCAACAAAAAAATTTATCAAAAATATAAATACATTTACAATAATGAAACAAACCAA  
GAAACAATTAATAAAACAAATCAAAATACAATTCACTTTATTTGACTATAAAAAAGTCACTTTATAATATTAGGAATAG  
TAAGAAAAATTCACATCTTTTTTTTGAATTTATCCTCCTTGTGCAAGCATATGTATTTTACAAATTATCCCGAACCCGAG  
TTATTAATTTATATAAGTTAAGATCTGTTCTTGAATATCATGGAATCTTTTTTTCTTAAGACTGCAATAAAGGATTCT  
TTTGGAACACAAGGAATATTTCAATCCGAATTAGAGCATAACGAAATTTCCAAGTTATGGAACGAATCAATGAAAAACTG  
GTTAAGAGGTCATTATCAATAAATTTATCTCAGATTAGATGGTCTGGATTAAATACCACAAAAATGGCGAAATACAATCA  
ATCAAGGCCGTATAACTCAAAAAAAAATTTAACAATAAGGATTCAAAAGACCGATTACTTCTTACAAAAACAAAAC  
GCTTTTTGAAGTATATTCAATACCAAACCAAATAAAAAACGAGAATTTCTAAAAATACTATAGATATGACCTTTTTATCATA  
TAAATCTATTAATTATGAAAGGAAGACGGACCCATATATTATTTATGGATCACCATTGCAAGTAAATAACAACCAAAGAA  
TTTCTTATAATTACACCACACAGAAACAAAATTTCTTTGATATACTAGAGGATATTCCTATCAATAATTATCTAGGAAAG  
GGTATATTATGTATATGGAAAAAATCCAGATAGAAAATATTTTGATTGGAAAAATTATCAACTTTTTTTTAAAGAGAAAA  
AGTTGATATTGAGACCTGGATCAAAATGGATCCCAACAGTAATAAAAAATACTAAGATTGAAAGTAAGAATTACCAAAAA  
TTGATAAAATTCATAAGAACCAGATTTTTTATCTTACGCTTTATCAAGATTTAGAAAAAATCCGCTCAATCAGAAAA  
CACCTTTTTGGTTGGATGGAATGAATCAAGAAATACTAAATCGCCACATATCGAATCTGGAATTTGGTTCTTCCCAGA  
ATTTGTGCTACTTTATAATGTATACAAAAAAAACCGTGGATTATACCAAGCAAATTAATCTTTTTTAAATTTGAATAGAA  
ATGAAAATGTTAGTGACAATAAAAAACATCAATGAAAGCAAAAATGGAATTTTTTTAGACCATCAATGAAAAAAAATTT  
TTTGAATTAAGAATCGAAATCAAGAAGAAAAAGAACCCGACAGCCGAGGAGATCTTGGATCAGATGCACAAAACCAAGG  
AAATCGCAGATTCGTTCTATCAAAATCAACAAAAAGATATTGAAGAAGATTATGCGAAATTTGGTCTGAAAAGGGGTAAAA  
CGAAAAACAATCCAAGAACAAAAGTAACGTGAAAGTAGAACTAAATGCCTTACTGAAACAGCATTGCTTTTTTCAATTG  
AGATACGACGAGGGTTTTAAAGCAAAGAATGATCAATAATCTCAAGGTAAGTTGTCTCTTGGATTGGACTGA

Pelargonium TTATAAGGCCCTGAGCAATTTTTATCTGAAAATCATACTCGCTCTTGGCCTTATGTTGTATCAA--  
----TTTTTCTGGACGAATCATCATCTG-----GATATTTTTCTA-----

CCTAAATCTTTTTCAACTCCACAGCGAGATCAGACCCTA-----  
GCATTTGTTTATGGGTTAAGTTATAGATTATTAATTTATACCTTTTTTCCAAATTCATTTTTCTCGAGAATGATCGTAGG  
GTACTTGGTACAGTGCCAATTCAAAATCTTATTTCTTATACGACTTTTTTTGTTTGGATGATCGGTCACTTGATTTGTA  
TAAAATGGGTTCAATTTTTGACATTATGGCTACAGAAA---AACTAT-----TCG-----  
-----  
-----

GCTTTTCTGATTCTTACTCATCAACTGTACCTGCAAGATAAGATCAAGAAGATCAGATCCCGGACTATACCTATAGCCAA  
AATATTTGAGTATAAACCAGGATCCTGTTATGAAACCCGGAATCTATAGGGAGTCACAAACAATCGACGAAATGATTCAA  
TCTTAGCTACGATTCTATTTATCGTTGCGCTGTATTTGTTGGGAAAATCCCCATACCTTTTTGTTCCGCACAGTCCATCA  
GCGCCTAATGCAGTGCAGCTAGCAAGGATGTCACGCTAGAGGAAGAAGCCAAAGTGCAAGAGAAAATAGAAGATAGATT  
CTATCCATTAGAGGACTTCGATGAAGAACAAAAGAAAGACGAAAAGTCAGCTGACGAAGAAAAAAGGGCTGTAGAGG

AAGAGAATCAAGAAATTTTGGATCTCGAAGAGGAAGAGAATCAAGAAATTTTGGATCTCGAAGAGGAAGAGAATCAAGAA  
ATTTTGGATATGGATGAAGAAAAGGATTTGAAAATACCCTTTATACTTTCTTTTCGGATTGCTTTTTTCGAGTCCTTTTC  
ATTTTATGCTTTTCCTTTTCAACCGGTTGAAATTTCTATTCTGGTTACCTTTTCAACCGGTTGAAATTTCTGTTATGGTTACC  
TTTTCGACTTGTTCCTTTCTAGTCGCTTTTTGAACCGAATCGAGCCCCTTTTTTCTCCCTTTTTGGTTCGTGGTAAAA  
CCTTTTTACCTCTACTTTTTCAATTTCTTTTCCGTGTATATTCCCATTTTGAAGTTCCTTAAGTGGTTTTTATTCAACCA  
CAATTTTGTTCCTTTAGCGCAATTTTCCGCGGTTTTTCCCATTTCTTTTTCAACCCCTAGGAGGTGGGTTATACCTTACCCT  
ATATCAAACTTCTTTCTACGAATATAGTGTAAAAAGGGGGGTTTTTACAAATTTTGTTCCTTTATAAATGTCAAAGCGAT  
GGAAAAGAACGGACCTCTTTCACATATCCACTTTCTTTAATCACTTTTTATAAATGATTGAAGGAAAATTTCTTTGT  
TAGAAAAAAAAGCGACTCCCCGATAGGGATAGATTGTACACCCTTTGGGTTTTACGAAATGCAAAGAAAAGGACAGTC  
TCAACAAGGAATTAATAAAAAGAGTACAGAAGCTAAAAAGCGGATCTCTTTTGAGGGATGTATTGGACATACGGGAAAG  
CTCTTTCAATTTCAAATACACTCCGAAAGTGTTCGATCAATTTCTGAGACCCTTTTGACCAAATGCACCCGTCGGGAGG  
AAAGAAAAGGGAAAATGACCCAGTCTGGGATGGACCTTCTCGCGGAGCTTTTTGGTATAACCATAAATTTGACGAAAACAG  
CAGCGGAACAGAGGGTTGACGAGGAAGAGCACCTGCAACAATGTGGTTGTTTTTAAAGACTTAAGGCCTTTAAATCAG  
AAAGAGCAGTATTTGATACTCGAACGCCAGAACTGGAACGGGAAAGCCAGGAAAAACAAAAGCTTAGACGGCAATGTTT  
CGAAAAGAGTCTATTAGGGAAAATTTGAGAATACTTCAAAAAATGGCTCCTTATTTTCGAGCGCCACAGTACATCCCAA  
GTAATCTATGTGCGGAGCTTTTTAACTTTACCGGGTATCTGCTTACTTGACTCTTGACTGGCAGGAAAATACCAGAATA  
TTAAGGCGAGTTTCAAGCTGAGAAAAGAGGGGCATGATTATCCGAGTCAATGAGGAAAGAGAGAGTTGGATTCTGTTCTCA  
CAAGGAACGCTATCTAAAATCAAGGAAATTCGAAAAAAAAGGGTGAATTTGAAAAAAGAAAAAGAAGACCCAAGAAAA  
TTTTGTTAAGGTTAGATAAAAAGACAAAAGAAAGGAACCTTGAAAAAAAAACAAAAGGAGGCTTTCCCTTAAATACAATT  
TTAACTAGAATTTTGGTTCTTAATTTCTCATTTTAGAACAAGTTCAAAAAGAAAGCGAGATTCAAAGATAGAAGAAACCT  
TTATTCCTATCCAAACCCATTGTTAGAGAAAATAAACAAAATACGTGAAACCGTAACACGGTATATCACATTATGAATA  
CCTACTATGAGGGTAGGAGCGGTTTACACATGAAGACATTCTAAGATGCGAAAAAATATCAAAAATACCGTCAGTTT  
CAGCTGAAACTACGGACAATCATGAAAGAAGTCCCTCGATGGGGATACAACATAGATGATGAAAAAATAGATTATAGTGA  
TTACAATATAAGAAATGACGATGTAGTAGCCGAAGACGTCTATTTGCGTACAAGAAAAGCAAAAATTTAGGGTATTTAGAA  
CCAAAGTATGGAAATACTATGAGCGACATGATAAACGTGAACTGAAGCAATGGTATTTTTTACCCTTACGCTAAGATCACG  
CATTTTCGTGCAATATGGTCAAAGGTGCGGACCGCACCCAAAGGCGAAAAGTAACGATTTGTGGGTGGTATGAACACCG  
GGTCCAGTCGCCCCTTTTTTTTGCCCCAACGAAGGAAAACACTTATACTCATTATGCTCACTTTAGATGTCTTTGAGCTTA  
TGAAAAAATGTTATAGATTTTTTACGACAGGACTCCCGGTTCAAGTTAGAGTTAAGCGTATATCCGAAAGGATAAACCGA  
ATTTGGAAGAACTGTGGAACCTGCCAGATTCTCAAAGAGTGTCTATAAGAGGCTGCTATAGAAGCAGAAAACGAATCCA  
AGGACTGAGGGAAAGCGAAGAAGACAAAAAAAACGCCAAGAACGAGGGGATGCCTTAGAAGAATGGCAGGAGCGCCGAG  
AGGCGCATGAGATCCGAGCCATTTGTATAGCGGAAACTTGGGAACTCCTTCAATCGGGTCATGCAGTAAGATCTCTGATC  
CTATTAATCCAATCGTTTTTTGAGGAAAAATGTGATCTTTCTTTCTTGATAATAGCTAAAAATATGGCTCGTATACTCTT  
CTTTCAAAGTCCCGAATTGTTTTCAGGATTTTCGCGGATTTAAAGAAGGAAAATCACACCTTGTGCGATTTTGGTGGTATTC  
CACTTGACGAGTCACAAGACCCAATAGGGTGGTTTACAGATGGTTGTGAGATAAGGATCCACTTTCTTTTGGAGTGGAAA  
CCTTGGCGAGAAACCGAGCAAAGCAAAGAGAGCAGTGTGGCAGAGGATTTGTATTTAACCCTTTTTGGAAGAATCACTAA  
TATTCCTTTTGGTACGGCTCGCAAGCCCTACCCGTTTTTTAAAACCGTTTTTGAAGAATAAAGAAAAAAAAGCTTCTC  
AAGAATCAAAAACCTACTACAAGTGAATTAGAAAAGTTGCAAAAAGAAGGGTTTTTTGAAGTTTAAAAAAAAGGGCTTT  
CTTCGAAAACGTCTTTTAGCTTTTCAAAAAAAAAGCTTTCAATCCAAGCTGCTAAAGGGCGTAAAAGTAAAAAAAAGAAC  
AAATTTGAAAAAAGGGCCACAATCTAAATTAACAAAAAAGAAAAAAGAAAGGAAAGTGGATAAAAACAAGGGCAATCATAA  
ATGAAATAGAAAGGGTTCTAAAAGAAAAAAGAAAAAAGACTTTTTATTATTCAAACAAGCATTAGTTTCGACCAAAAACAAGT  
TCTCATTCTAAAACATCAGAAGCACTACGAAGACTTTCTAAAATCTTAAAAAGAAGAAAGGCACGATTTCATTTCGTAATC  
TACAATTTTTAGAAAATGGATCATTGAATGGATATACGTGAAAATCCTTTTTCGATTTGAAAAATAGATTTGATTTGAAAA  
AGAGGTTTCTAGATGAAATGAATAAGAAAAAGAGTTGTCTGAAAATGGTTGCGCAGTTTTTTTTTCAATTCAAAAAAA  
AGAAAAAACAAAAGATTGACAAGGCCATTAAGGCATTAATAAAAAGAAAAAAGAAAAAAAATCGCTTTATTTCAACTAT  
AAAAAACATTTCTTTAATATGAGAAATAGTCAAATTAGTAAGAGTCAAAAAACCCCTTGTTTTTACTTATCCTCTCTGT  
CACAAGCATATGTATTTATAAATATCACAAACTGAAAAGTCTTCTTTTAGAGTCTCTAAATCCAGAATTTGAGAAAT  
TGTAGAGTTGGAATGAATCGATGGAAAGAATGGTTAAGAGGCCATTTTGACTACTATCTTTTATCTGACATTAGATGGTC  
CAGATTAGAAGCACAAAAATGGCGAAAATAAATGAATCAATGTGCGACGGCTGAAAATCACAATTTCAAGAAAGGGGATT  
CATATGAAATAGACTCATTGCCGATTAACCCACAAAAATGAAATTTAAAAAACACCTTAGATATGATCTTTTAGCATAT  
AGCTTCCTTAATGCTGAATATAAGAAGGATCCCTATGTCATAGCGCCATCCT

Phalaenopsis GCATCTAGCATTAGGTAGACCTCATAACAATAACTGTCCTAGTTCTACCGTATCTTTTGTTCAT--  
----TTCTTCTGGAACAATCATAAAAATTTTTTGGAT-----TATCGATCTACTCAC-----

AGAAATTCATGCGTAATCTCAGCATTCAATGTGTATTCTTAAATAATCTAATTATTCAATTATTCAACCATTTTATTTT  
CCCAAGTTCCACGTTAGCCAGATTAGTCAACATTTATATGTTTCGATGCAACAACAAGATTTTATTTTAAACAAGTAGTT  
TTGTTGGTTGGTTAATAGGTACATTTTATTTCATGAAATGGGTTGGATTGGTATTATTCTGGATACGGCAA---  
AATAGT-----TCT-----ATTCGATCTAAT-----



----AAGTAT-----CTCGTGTGAGAATTGAGAAATTATATG-----  
GGCCGAATCTTTAGTATCCTCTTATTTCTTACCTGTGTTTACTCTTTAGGC-----AAAATGCCGTACCTATT-----

GTCCTAAGAACTGAAAGATAAAGAAACCTCAGAAACGGAAGAAGGGGGAAAAATAAAGGAAGAAAATGATGTAGAAAC  
AACTTATGAAATGAAGGAGACTGAACAAGAACAAGAGGAATCCACCGAAGAAAAACCTTCCCTTTGTTTCGGAAGAAAAGG  
AGGATCTGGACAAAATAGATGAAACGGAAGAGATCCAAGTTAATGGAAAGGAAAAACAAGGATGAATTGAACTTTAAA  
GAGGCATACTATCAAGATAGCCCGGTTTACGAAGATTTTGATCTGGAAACCCATCAAGAGAATTGGGAATTGGGAAGACT  
GAAAGAAGAGAAAAATAAAGATTGTGGGTTGAAAAATTTTTGTCACTTTTTTTTTTTGATTATAAGCGATGGAATCGTC  
CATTACGATATATAAAAAATGATAAATTAGAAAAATGCTTTACGCAATGAAATGTCACAATTTTTTTTTTTTACATGTACA  
AGTGATGGGAAACAATAATATCCTTTACATATCCACCCAGTTTATCAACTTTTTTCGGAATGCTAGAACGAAGAATTC  
TTTGTACATAATAGAAAACTATATGACGAAGATCTTTATAATTCTTTGGATTTATGCTAATGAAAAAAAAGTGCAATT  
TGAACAATGAATTTGAGAAGCCGAATCCAAATTTAGAACAATAAGAGATCCTCTAGTCTGGATATGCTTGAAAAAAA  
ACCATATTATGTGATGATGAAAAAAAAGAAATGCTTGCCAAAAGCTTATGATCCTTTTTTCAACGGACCATATCGAGG  
AACGAGAAAAGAATTAGATTCACGTGCAATCATGAATACTTATACAGATACAGAAGATTTTCATAGAATTTTTTTTTATAA  
ATAAGATTCATGATTTACTTCTTAATAATTCGTAACCTTCATCGTCAATCATTTTTTAAATTCACAGAAGAAAAAGA  
CTTGATTCAGAAAGTGAAGAAAAATTTTTCAATTTTTTATTTGATGTAATTACAACACATACAAAAGATCAAAAAATAAT  
GAAAAAGAAATCTATTGGAATTAGAAAAGAAGAAATCAGTAAAAAGGTTTTTAGATGGTCATACAAATTAACCGAGAATT  
TGGGAGAAGAAGAAGAAAATGAAGAAGATTTGGAGGAAGAATATTATGAGATTCATTCAAGAAGAGCCAAGCTTGTGATA  
ATTTATAATGATAATGATCAGAATACCAATTTCTTTCTAGTATTCTGAATACTAGTAACAATGATGAAAAGGATGATCA  
AAATGAAGAGGTAGTTTTAATACGTTACTCACAACAATCGGATNTTCGTCGCAATCTAATCAAAGGATCCATGCGCGCTC  
AAAGACGTAAAACAGTTATTTGGAACCTCTTTCAAGCAAATGTACATTCTCCTTTTTTTTTGGATCGTCTAAACAAAACA  
TCTTTTTTTTTCGTTTTTTGATATCAACGAAATTAAGAATCTAATTTTTAGGAATTGGATGGCGAGAGAACAAGAATCAGA  
ATTAATAATTTCTATTTTTGAAAATGAAGATAAGAAAAGAAGAAAAGGAGAAAAGAAGAAAAGAAATATAAAAAATGAACAGA  
TAGAAGTATCAGAAGCTTGGGATACCTTTATATTTACTCAAGTAATAAGAGGTTTTGATGTTAGTAACCCAATCTTTTTCTT  
AGAAAATACATTATATTGCCTTCATTAATAATAGCCAAAAATCTTTTCCGTATTTTATTATTTCAAATTTCCCGAATGGGA  
CGAGGATTTAAGGAATGGAATAGAGAAATCCATATTAATGCACCTATAACGGTGTTCATTTATCAGAAACAGAATTTT  
CCCAAGCTTGGTTAATAGATGGTATTCAGATAAAGATTTTATATCCTTTCTGTCTAAAACCTTGGAGAAAATCTAGGGCA  
CGATCTTATCAGAGAGATCTAATGAAAAAAAAGAAAAAAAACAATTTTTGTTTTTTAACAGTCTGGGGAATGGAAGC  
GGAATTTCCCTTTGGTTCTCCCCGAAAACGACCTTTCTTTTTTGAACCTATTTATAAAGAATCTCAAAAAGAAAAAAA  
AGGTGAAAAAGAAATTTTTACAACCTTAAGAAAAAAAATCCTTTCTAAAAGTTAGAAAAGAAAAAAAAGGAGTC  
ATCCAAATAGTTCAAATTATCAACCTAATAATGAAAAAACTGGATAAAGTAAATCCAAATTTATTATTTGAAGTGAGGAA  
AGAAAAAGTATATGAACCGAACAAAAATAAAAAAGATTTAAAAAGAAATATTCTAGCGAATCATCCGTTCTGAATCAAA  
CGATAAATTGGTTCAATTATTCATAATAGAAAAGAAAAATGAAAGATCTTTCTGATAAGACAATTCAAATCAGGAATCAA  
ATCGAAGGAATTGCAAAAAGACAAGAAAAAAAAGAAATAGTTATAATTTATGATAATAAAGATCGGGATTACAGAAGCA  
TATTTTGAAAATATTAAAAAAGAAAAATATCCGATTAATGCGTAAATCACATTACTTTATCAAATCATTATTGAAAAAA  
TATACATAGATATTTTTTATGTACCATTACCATTTCTAAGATCAATACACACCTTTTCTTTGAATCAACAAAAAAGATC  
TTTAATAAATCCATTTACAACAATGAAATAAATAAAGAAATAAAGAACAAGAAGGAATTGATGAAAGAAATCAAAATAC  
AATGAATTTCTTTTGACTATAAACAATTTGTTTTCAAAATATTGATAATACTAAGACTAGCAATAAAAAATCCAATACTT  
ATTGGAACCTTATCTTCCCTATCCCAAGCATATGTTTTTACAAAATATCCCAAAACCAATTACTTAATAAGTATCATTG  
AGACCTGATTTCAATATCAAGGGAGCTATCCTTTTTTTAAGGATAATTTCAAAGACTATTGTATGATACACGGAATATT  
TAATTTCTAAATCAAGACATAAGCAAATTAATACGTTTGTAAATGAACGAATGGAAAACTGGTTAAAAAGTTATTATCAAT  
ACGATTTATCTCAAAAAAAAAGTATCAATTAGTACCTAATGAATGGAGAAATATAATTGATAAAAAATCGTATGATTCAA  
ACAAGGAATCAAACCAATTGGATTTCTATAAAAAATACCGATTCATTTATTCCATGAAAGAAAATGACTATGCAGAGAA  
TTCATTTATGAATAAAAAAGATAAATGGAAAAAACATTACAGATATGATATTTTATCATATAAATACATAAGCCTCCCTA  
ATTTATACATTTCTGGATCAACATTAGAAAAAACGGGACCAAGAAATTACATATCATTTCATACATCGAAACCTGAA  
TCATTTTATGTATTGGTAAGTATACCTAGTAATGATTATCTAGAAAAAGGATTTCTTATTGATAGGAATACTAATTTGGA  
TTTGGATAGAAAAATTTTATGATTGTAGAATTTCTCATCTTTGTTTTCTAAATAATATTGAGAATAATATGGATATCTGG  
ACCAATGCACATATTGGCATCAAGATTCAGAAAAATACTAAGACTGAAATTAATAATTTCAACAAAATGAAAAAAAAGA  
TCTTTTTTTTTCTACAATTCATCAAGAGATCAAAACATGCAATTTTTTTTTGAGTGCATGGGAATGAATAAAAAAAGGT  
TCTATGATAATGATATCGCATCCAATCATGATACTATACCAATCTAGAACTTGGTTCTTCCCAGAATTTGTACTACTTT  
TTGATGTATATAAAATTC AACCTTGGATCATCCCAATCAAATCACTCTTTTTTCTATTTTCTATAAATGAAAAAATTAAC  
GTAAAATCATCTAAGAAAAAAAAGATCTTGAATTAGTAAAATCCAAGCAGGAAGAAAACCAACAAGAGGTCCAAAGAAA  
TTTTGTATTGAATCTACTAAACAAAAGAATAAAAAAGCTGTTGAAGAAGATTACGCAAGCTTAGAAAATAAAAAAAGGTA  
TAAAAAAAACAATATAAGAGCAAGAATGAAATGGAAGTAGATTTCTTTTTGAAAAAATATTTCTTTTTCAACTAAGA  
TGGGGTATCATTGAAATAAGAAAATAATGAAAAATAAAGGATATATTGTCTCCTACTTAGACTGATAAATCTAAAGGA  
AATTGCTATATCTTCGATTC AAAGAGGTGAAATAAATCTAGATGAAATGTTGATTC AAAGGGACCTAGTTCTTGCAGAAT

TGATAAGAAAGGGAATATTTATTATTGAACCAATTTGTCTATCTATACGAAGGGACGGAAATTTCTATTATATATCAAAC  
ATGGATATTTTCATCAGTCGATAATAAGAAGTACCAAACAAATAAAAAATACACAAAAAAGAATTGAGA  
Pinus CTATGCAGCGCTGTGGAAACCTTATGCAATAACTTTATTAGTCGTACCATATATGTTCTTTTCGT--  
----TTTTTCCAAATTATGGACAAACCTTCAAGTTCT-----GAATCTCCGCACCTC-----

ATGAATTCGATCAACAATCCAAAAGCTCTAAGTCTATTTATGGATGGTCTAATTCTTCAATTGTTGAATCCCATTCTTTT  
AGCAAATCCCGTATTAACAAGACTGGTGAACCTCTTTCTTTTCGTTACAGCCCTAATATATCCTTTATGATAAGTGGTC  
TTTGCGGTTGGTTGGGCGGTTCATATTCTATTAACAATTTTATAAAATGGGTATCTTTCCGTATAGATCGT---  
AATTCA-----CTT-----ATCGATAATACTTTA-----  
-----TTAAGACGTTATATC-----  
AATCGAACCTTTAGTTTACTTATTCTTTGTTATTGTTTCGTTCTATTTGGGT-----AGAGCCCATTACCTTTT-----

CTTAAAGGTAAAAATTATGAAGACAACAATGGCCGCTCTGTGACTATGGCTAGAGATGACCGCTCCGTGGCTATGGCTAG  
AAAAAACCGCTCTGTGGCTATAGATCCACAAAACCTTCAAGAACTTATAAAAGAAGAAAAGTTCTTCCGGCAGCAACCAT  
GGCCCATTTATGTGCTTTGATCATAATAGGGTTTATCAACCGATACGATATATTGGAAATAGCCCATTTACTCGCCTAGGT  
CCTGTGAGGACCGAAGTCTCTCAATATTTTTTTGGCGCATACTCAAGTGATGGAAAAAAGAATCTCTTTTACGTTTTT  
ACCTAGTGTATTGGTCTTTGGGAAAAGCTCGTCGGTGGATATAGAGATTTTTTATATACTTCTTGCTCATCTGAGGATC  
CTTATTATAGATGGAATCATACCGTGAAAAGAAAAGAGATTCTTTAGGGAATGAATTTTCGGATCGAGTGAAAGCTCTA  
AGCCATGGATCTCCCGCTGAAAATGTTATAGAAAGGAGAGTGAAATTTCTCAATTCTAATGGGGATTCTTTTACTGAAAT  
GTATGATCCATTCTTAATGGGGCATTCCGTGGAACAATAAACCAATTTGAGTCCCCCAAATGCTGAACGATTTCGATCA  
TTTCGAATCTTTTCGGATTTTCATAGAGATATTTATGAGAGACCCTAAAGAGGGATTCCCGAATGATCCACTTGGGTATGGG  
TACCATATCTTCTTTTGGCAGGAATTGGAACACGAAAGCTTTCCACTACCCTGGGAGCCCTTACCTACATATACTGT  
TCGTTTCGCTTGTCCCGGTCACTATATCCTCTAATCCCGGAACCTCTCAACCCAAATATGCTTTAAATAGATTAATAATGA  
AAAAGATCTCTTATCTGATCCAGACCCAGAAATCCAACCACCATATTGGTTGTGGATAGCCTGGAGATCATCCATTATA  
CATGTCCCAGTGCAAGTAGCTAGATGTTATGGAGATATCTACACAAACTTTTTAGTTTATGTTTACGGCCGATTTGACCG  
TCTTATAAAACCTTCGGCCTCAGGTATCATAAGAATGGATGCGATTTCTTGTCTGTTAAGAAGGAATATCTTTTCGTTT  
ACGAGAATTTGTGTTTCTTTTCGAGTGTTTGGCGCAATATGAGTGGACAATACTACTAATATCTCGCGCGGGTATACCT  
CGGGATAAGCGTTATTCAATGGAAAAGAAAGATTTTTTCCCTTTACAGGGAAATACTATTAATGAACCTCTCCAAAT  
TAGAGAAATTCGAAACATGTGCCTCGATGGTCTGTTGATGATAGTGAATATGATGACGTGACAGCCAGTTCTAT  
TATCATCGAATAGGATCTTTTCAAGAAAGGTCAAAGATACAATGACCTTTGATATTGGGCAAAGACGAATAGGAGTAGTT  
CAAAACCGTTATTCTGCCGAGGCAGATTATCGTCGGAACCTAATCCAAGGATCCATACGTGCTAAAAGACGGAAAATTAT  
GATATGGAAGAGGATACAACCGAATGTACATTCCCTTTTTCTTTTTGAAAAGAAAAGAAATACCCGCTTATCCTAAAGATT  
ATTATGACACGTCCGATTCTGGTAGAGTGGATAAGGAACAAATCGGGGAAGAAGTTAGGGAAAAAATCCAGAGAGTCGAA  
GATCCATTATCCCAGCAGACAATTGCTGAGTCCTTATGTTTAACTGGCCAGAATTGCACTATTTTACAGAGGTTTATTATT  
AATGGCTCAATCAAAATATTAGAAAAATATTATATTACCATCACTTATTATAGCCAAAAATATGGGTGCTATTTTATTAT  
TTCAAGTCCCGAATTTTACAAAGATTGGGAAGAAATGAGGAGAGAAATGCATGTCATATGTGCTTCTGATGGTACCGAA  
TTGTCTGAAACAACATTTCCAGACAAATGGGAAACACAAGGTATGCAGATAAAGCTTCTATTTCTTTTCGTTTGAAGCC  
TTGGCATAGATCCAAACCCCAATCTGCAAAAAGATTGCGTTGGAGTTATTTAACGACCTTTGGATTAGAAACTGACATAC  
CTTTCCGTGATCCAACTCAAATCTAGGAATTTTTTCCAAATTTTTTAAAACCCATCTTCAAAAAAGTGAAGAGACGATTG  
ATGGGATCTACAGGAATAAGACGCGTTCCACGAGTTGGATATATAGACAAGAGTGAACCTAATGACCCGATACAAAATAA  
ATTACTAAGTGAGACTACCCCTATGGGTAGTGCAAATGATTTCATCCGAAGTTAATGATCAATTTGGATATGAAACCCAAA  
CAATTAATGTGAAAGATCAAGATGATTGGACGACCACAATGAAAGAGCGGATCGAATCTATCGCGATCATAAATAGCTCT  
CCTATAACTGGAATGTCTCTGGTGGATTTCAGAGATTTCATACCGGATCGAAGGGAAGTTTTAACATATTGGGATCAACATT  
AAAAAACGATTGGTTTCAGATTCCGGCGAATACCTGGTTTATTTGAAAATAAAAGTGTACAATTAATCCGAAAAAGGTTCT  
ATTCAAATTAATTTTTTATCAAAAAGAAATGGACCGAAGAATGGACCGAGATCTCTTACCAAGTTTTATTAATTTTCATTGCG  
TCAAATATCAAATTTTGGATTCAATCCGCTTGGATTTCGATCCACGAGGAATATAACAACAATTTACGGACGAATATTCAT  
TATCAATAAAGATATTTCAAGAATCAATAGAGGTAATAATACCACTACTATTCAATCAACGAAAAAATACAAGATTTTG  
AAATTCGTCCTGATCGAAACATGTTCTCAATGTCCCAAGCATATATATTTTACAAGATATGGCAGATAAGGGCATTAGAT  
ATACAAAAGAAATATTGGATCACGAAAAACCACAAGATCTGAAAAGAGAATGACTGGAAAACAATGGTTGAGATGTTTTGACCG  
GTACAATTTATCCCCACAGATATGGTCTAGGATAAAACCCAAATAAATGTAGAAATATAGTAAATAAGCAATGTACGTGTT  
ATGAAGAACGATTTCGTTCTTATGAACAACAAGAAGATTCTATATTTGCGACTGTGATGGAACCTTTTTTGGGACTACTT  
CGGAAAATGAACAAACGTTACAGATACGATCTCTTATCATATAGTTATCTCAATTCTACAAAAGATTTGGATATTCTCAA  
TTTGACAGATATTTCCCGGACCACCAGTACAACCTGCTATAACCAGATGAGCGGGATATTACCGATCGTGAAGGAATTCTCA  
AGGAAAAGTTTTATTAATGATATTATCGAGGAGGATTGGAAGGGTACCGATTTCAATATCGTGAATGGTTCTCGTTCTACT  
GTTGATATTTACGATGCTATACGTTCTTGTGATTACGATCATAACAACAAGTATTGACAGGCAAAAAGAAAAGACTGATCT  
TATTACGAATCAGCAGGGGATTGACGAGACGCGAAGAGAAAATGTTGGCATTATGGATTCTCCGAAAATCGAGAAGAGAA  
TATCCAATTAGATCTCAATTTCTGTTTATTCCCGGAACCTTCGGGAATAAAGAACATATATTATGAAACTAAATCGAAA

TTCATAACCAGGAAATTCACCTTTTACGGGAAGAACGAGAGCGGAAAAAGATAGAGGAAGAAGAACCGAAGGAAACAACAAA  
TGTTCTAGAACAATAATAGGTATTAGATCAAATGTTAAGAACAACAAGTAGAAGATGGTCAAGATAAAAAATGGTCAAG  
TAGAAGATCAAGATGGTCAAGATCAAGATGGTCAAGTAGAAGATCAACAACTGATGGAAAGAAAAAACTAATAAAGGT  
CTTTTTCAATGCAAAGTAGTAGACGTTCTAGGGAAAAAACGTTTCTTCTATCTGGCGAATATTTGCAGGGTTATGTCCGG  
AATGAAGGATCCGGGAACATATCTTCGGATCCAAGAGAGAAATATTGACCTGAGTCTAATGGCCTTTTGCATTGCTATTC  
AGAAGAATAGCAGTGCAAATAAAATATCGAAAGAACTTGCTCTTCAGAGGAATGTTCCGGGAAAGGTACGCAATGACAAT  
GAAATAAGGGAAGATAAAAAATAATGGTCTTCCAACCATATCGTTTATCAAGCATAGTGGATGACCAATTCCTGATGTA  
TAAATCGTAAGTATTTCAATTGAAGTAAAAAAAAGAGCCGGAGAATGGATAGATGGAGATTTTTATGATGGATCTGTGC  
AACGCGGGAAAAATCTGGGGGATGAAAAAAATATTTTTAGTTCCTCAATTTAGAAGATATTTGCTTCCAAAACGTCTG  
AGAGAATTTCGAATCTTGAATCGGTTTGATCTGGAGAACGATCATGTAGGATTTTCCAATGGAAAAGACA  
Piper GCACCTAGCATTGGGTAGACCTCATAACAATACTGTCTAGTTCTACCGCACCTTTTGTTCAT--  
----TTCTTCTGGAACAATCACAACACTTTTTGGAT-----TATGGATCTACTACC-----  
-----

AGAAATCCATGCGTAATCTCAGCATTCAATGTGTATTCTGAATAATCTCATTTTTTCAATTATTCAACCATTTTCAATTT  
ACCAAGTTCAACGTTAGCCAGATTAGTCAACATTTATCTGTTTCGATGCAACAGTAAGATCTTATTTGTAACAAGTAGTT  
TTGTTGGTTGGTTAATTGGTACATTTTATTCATGAAATGGGTTGGATTGGTATTATCTGGATACGGCAA---  
AATCAT-----TCT-----ATTCGATCTAAT-----  
----AAGTAC-----CTTGTGTGAGAATTGACAAATCTATG-----  
GCTCGAATCTTTAGTATTCTCTTATTTATCACCTCTGTCTACTATTTAGGC-----AGAATGCCATCGCCTATT-----  
-

GTTACTAAGAACTGAAAGAAACCTCAGAAATGGAAGAAAGAGGGGAAAGTGAGGAAGAAACAGATGTAGAAATAGAAAC  
GACTTCCGAAACGAAGGAGACTAAACAGGAACAAGAGGGATCCACCGAAGAAGACCCTTCTCTTTGTTCCGAAGAACAGG  
AGGATCCGGACAAACTAGATGAAACCGGAAGAGATCCGAGTGAATGGAAAGGAAATATTTAAAGATGAGGAAGAGGAAGA  
TAAGGACCTCTTTTGGTTTGA AAAACCTCTTGTA ACTCTTCTTTTCGACTATAAGCGATGGAATCGTCCATTACGATATA  
TAAAAATGATCGATTTGAAAATGCTGTAAGCAATAAAATGTCACAATATTTCTTTCACACATGTCCAAGTGATGGAAAA  
AAAATCATATCTTTTACATATCCACCCAGTTTATCGACTATTGAGGAAATAATACAAAAAGGATGTCTTTATACACGAC  
AGAAAAAGGATCCCCAGAGGACCTGTATAATAATTTGGGTTTATACAAATAAAAAAAAAAAAAAAAACAACTTGAGTAATGAGT  
TAATAAATCGAATAGAAGCTATAGAGAAGGGGCTGTTTCAATAGATGTACTTGAAAAACGGATCCGATTGTGCCATGAT  
GAGAAATGAACAAAAATGCTTGCCTAAATGGTATGATCCGTTTTTCAACGGACCATATCGTGGAAACAATTACAAGGTTGA  
TTCACAAAACGAAGACGAACATTTTCGGGGAAATGACTTGAAAAAAAAGATCTATGATATACCCCAATAAAATTTAAATTT  
CCCAAGAGTTTTGAAGAGAAAAAGAAATACGTTTCAATTTAATAGAAAATTGTTATCAACAGATAGTAATAATCTTTTTACT  
CCAATCGGTGAATTCGATGAGGAATTGGCGTCTAGTTTTTATTTAAAAGAAATTTTTTTAGATAGCGAAAAAAAAGTCT  
TTATTCAGAAAATCAAAAAAAAACGGCAACAACCCGTTGATACAATTAAAAAACAATTCAAATGATCAAGCACTTAGAA  
AACATGAAATTGAGATAGAAAAAATGAACAAAAA ACTTCCCGGTGGTCTGATAAAATTGATTGATGATTTGGAACAACAG  
GAAGAAGAAAATCCGGAGGAATCGACGGGTAATCCTGGTATTCTGTTCAAGAAAAGCTAAACGTGTAGTAATTTATACTGA  
TAAAGATCAGAATATACATACCGATACTAGTACCGATAGTGATCAAGCAGAAGAAATAGCTTTGATACGTTACTCACAAC  
AATCGGATTTTCGTCGTGATCTAATCAAAGGGTCTATGCGGTCTCAAAGGCGTAAAACCCCTATTTTTGGAAATGTTTCAA  
GCAAACGCGCATCCCCACTTTTTTTGGACAGACTTAATAAAACATCTTTTTCTTTTAAATTTCTCAAAAATGAGTATGGG  
AAAAGA ACTGGAATTCAAAACCGCCAATTCAGAAAATGCTGAAAAAAGGGAGGCAGTTATTAAGAAAAAACAGATAAAA  
GTGATCGATTAGCAATAGCGGAAACTTGGGATTCTGTTACATTTGCTCAACCCATACGGGGTTGTATATTAGTAGCCCAA  
TCGATTGTTAGAAAATATATAATTTTGCCACACTGATAATAGGCAAAAACCTCGGCCGTATCTTATTTTGGCAATCGCC  
AGAGTGGGACGAAGATTTTACGAATGGAAAAAAGAAATGCACATTAATGCACCTATAATGGTGTTC AATTATCAGAAA  
CAGAATTTCCAAAAGCCTGGTTGACAGATGGTATTAGATAAAAAATCCTGTTTCTTTTTCTACTAAAGCCTTGGCATAGA  
TCTAAACAACATCTCTTCAAGTGGATCCAATAAAAAGTTAAAAACA AAAATTTTTGTTTTTTAACGGTATGGGGTTCGCGA  
AACTGAACAACCCCTTTGGCCCTCCCCGAAAAAACCCCTCTTTTTTTAAACCCATTTTAAAAGAATTA AAAAAGAAATGA  
TAAATAGGTTTTTTAGAGTCCCAAAAACGTTAAAAAATGGAACAAAAGGATTTATGAAAGTTGAAAAAGAAAAGACAACA  
TTGATTATCCAAATAGTTTTCTTTTTTAAAAAGAAAAATGAAAGAATTTTTATTTGATTTGTAAAAGTGAATCCTACTCC  
TTTAGTAAGATCACAGAAAAATATATGAATCGAACGAAAATGAAAAGAATTTCTATCCTAAGTAATAAGATTACCTATGAAT  
CGAACATTCAAAAAAAATCGACGATAGATTTGAAAAATTTATCATTGACAGAAAAAAAATAAAGATCTGTCTGATCAT  
ACAAGCATAATCAGAAATCAAATAGAAAGAGTTGCAAAGGATAAAAAAAGAAATATATCTGATTTAGATAGAAATCCAG  
TACCGGCGAAACGGGTTGGTATGACAAGGATAAAGGGCGAGAATCAAAAAAGGGTATTTGGCAGATTTTTAAAAAAGAA  
GCACGAGATTAATACGCAAATGGCCTTATTTTTTTGAAATCTTTGATTCAAAAAATATACACGGAAACTCTTCTATTTACC  
ATTAGTAGTACCGACGACTATGCAAAAATTTTTTCAATTGAATCGACAAAAAATCTCTCAATAAACATATTTATAATGATGA  
AAAAGACAAAAGGGTAATTGATGAAATAAATCAAAAACACAATTGAATTTATTTCAACTATAAATAGATCATTCTTAATA  
TTACTAATATTTTTAATAATAGTAATAAGAATTCACTGACTTATTTTCGAGTTATTTTTCTTTTATCTCAAGCATATGATTT  
TTAAAATTTATCACAACCTCAAGTTTTTAACTTATATTGCTTGGGATCTTTACTTCAATATCACGGAGCATCCACTCTTTT  
CAAGAAGAAAATAAAAAGATTACTTAGGAAGCCAGGGAATATTTAATTTCAAATTA AACAGAAGAACTTCAGAATCTG

GAATAAATGACTGGAAAAATTGGTTAAGGAGTCATTATCAATATAATTTACCTAAAATTCGATGGTCTAGAATAGTACCG  
CAAAAATGGCGAAATAGAATCAATGAACGTCGTACAATTA AAAAAGAAAGGCTCCATATTTTCCATTTCATATGCAAAAAGA  
AAATGACCAATTCATTTATTACAAAAAACAAAAGAATTTTAGAATGAATTCATTGACAAATCAAAAAGAAAAATTA AAAA  
AACATTACAGATATGATCTTTTCATCATACAAATATCTTCATTATGAAGAGTTGAAGAACTCACCACCTTATTTCTCGGTCT  
CCATTCCAAATAAAGGGAGGCCAAGAAATTC CGTATAATTACAATAATTACAACAGACCAAAAATATGAATCATTCTTTTA  
TGTACCAGAAATAATAGCCATTAATGATTATTTAATAATGGGAGAGTATGTTTTTAATACAGATAAAAATCGGGATAGAA  
AATATTTGGATTGGGGAATTCTCAATTTGGGTTTTAAAAAAAATATCAATATTGAATACTGGACTCATATGGATACCAGG  
CCCTTTAGTCAAGACACTAGGACTCGATCCAACGATTATCGAGTTGTTGAGAACA AAAAATCTTTTTTTTTCTTAGGATTCA  
TCAAGAAATAAACCCATCCAATCAAAAAAACACCCTTTTTGATTGGATGGGAATGAACGAGGAAATGCTATATTATTCTA  
TATCGAGTATCGAGCCTTGTTCTTTCCAGAATTTGTACCACGATATGATATATATAAGATTA AACCTTGTATCATACCA  
TACAAATCACTTTTTTTGAATTTTTATGGGAAGGAAGCATTAGTAAAAACATCAACGTAATTCGAAAGGCAAAATCACGA  
TACATCATTAATTTAAAAAGTACCCCGTATTTCAAAAATATAAATCAAGAAGAAAAAGAAGGGCAGGGACAAGAAGTTC  
TTCGATCAAATGCACAAAACCAAAAAATCTTTTTATTGAAAAGGATTACAAAAGAATCAGACATTCAAAAAGCCTAGAACG  
AAAGCTCAATCAAAAAATAATAAGGAAACGAACTCGACTCTTTTTTGAAAAAATATTTGCTTTTTCAATTAAGATGGAA  
TAACTCTTTGAATCAAAAAGTTATTGATAATATCAAAGTGTATTCTCTCCTGCTTCGATTA AAAAATCCAAGAGAGATTG  
CTATATCCTCTATTCAAAGAGGAGAAATGCGACTGGATGTAATGCTTTTTCAAAAAGATATAACCCTTTCAGGATTGATA  
AAGGGGGGACTTTTTGGTTATCGAACCAATTCGTCTATATCTAAAATGGGATTTCCAATTTTTTATGTATCAAATTTGTAGG  
TATTTCAATGGTTTACAAGGATAAACAGCAAATTA AAAACAAGATGTCTGAATAAAAAGAATATGTTGATAAA

Platanus GCATCTAGCATTGGGTAGACCTCATAACAATAACTGTCCTAGTTCTACCGTATCTTTTTGTTTTCAT--  
----TTCTTCTGGCACAATCACAATACTTTTTAAATATAAAT---TATGGATCTACTATC-----  
-----

AGAAATTC AATACGTAATCTCAACATTCAATGTGTATTTTTGAATAATCTCATTTTTCCATTATTCAACCATTTTCATTTT  
ACCAAGTTCAACGTTAGCCAGATTAATCAACATTTATATGTTTTCAATGCAACAACAAGATGTTATTTGTAACAAGTAGTT  
TTGTTGGTTGGTTAATCGGTCACATTTTATTCATGAAATGGGTTGAATTGGTACTAATTTGGATACGGCAA----  
AATCATTTTTTTAGATCTAATGCACTTTTTT-----ATTAGATCTAATGTACTTATTGTACCTAAA-----  
----AAAAAC-----CTTGTGCCAGAATTGAGAAATTCATG-----  
GCTCGAATCTTTAGTATTCTCTTATTTATCACCTGTATCTACTATTTAGGC-----AGAATGCCGTCAACTCTT-----  
-

GTCACTAAGAAAAATGAAAGAAACTTCAAAAATGAAACAAATGGGGCAAAGTGAGGAAGAAACAGATGTAGAAATAGAAAC  
AACTTCCGAAACGAAAGAGACTAAAGAGGAACAAGAAGGATCCACTGAAGAAGACCCTTCCCCTTCCCTTTATTTCGGAAG  
AAAAGGAGGATCCGGACAAAATAGATGAAACGGAAGAGATCCGGGTGAATGGAAACGAAAAATCAAAGGATGAATTTAC  
TTTCGCTTTAAAAAGACATGCTATAAATATAAAAAATAGCCCAGTTTTTTCAAAATTTTTTATCTGGATGGAAATCAAGAAAA  
TTCAAAGTTAGAAATACTTAAATATGAAAAA AAAACCTCTTCTGGTTTTCAAAAACCCCTTGTTACTCTTCTTTTTGACT  
ATAAACGATGGAATCGTCCATTGCGATATATAAAAAATAATCAATTGGAAAATGCTGTAAGAAATGAAATGTCACAATAT  
TTTTTTTATACATGCCAAAGTGATGGAAAACAAGAATATCTTTTACATATCCACCCAGTTTGTCAACTTTTTGGGAAAT  
GATACAAAGAAAAATGTCCTTGTACACGACAGAAAACTCTCCCCTGAAGAAGTGTATAATCATTGGGTTTTATACCAATG  
AACAAAAAGGAACAACGTAAGTAAAGAGTTTATAAATCGAATCGAAGCTCTAGACAAGGGATCTCTTACTTTGGATGTA  
CTCGAAAAAAGGACTAGATTGTGTAATGATAAGACTGAACAACAATGCTTACCTAAAGTCTATGATCCTTTCTTGAACGG  
ACCCTATCGTGGAAACAATCAAAAAAGTGTCTTCATCTTCAATCATGAATGATTATTTAATCACTTCGATAGAAAATTCGA  
TAGAAAAGCTTTGGATAAATAAGATTTCATGGTATCCTTCTACCGATTATCGAGAATTTGAGCAGAAAAGAGAAAATAGAC  
ACATTTGATGGAAAATCATTATCAACAGATATTTTTTCATTTCTTAACCCCAATCAGTAAATTTGCTGGAGAATCAACAAC  
GAGTTTAAATTTGGAAAGGACTGCCTTTATTGGCAGAACAAGAAAGAAATTTATTCAAAAGATCAAGCAAAAATATTTAAAT  
TTTTATTTCGCTGCAGTTACAACCTGATCCTAATAATCAAATAATTAGAAATAAATCTATTGTAATAAACGAAATCTGTAAA  
AAGGTCCTTCGATGGTCATACAAATTAATCGACGATTTGGAACAACAGGAGGGAGAATATGAGGAAGAATCGGCAGAGGA  
TCATCAGATTCGTTACGAAAAGCCAAACGCGTAGTAATTTTTACTGATAACGAGCCGGACACCAATACTCATACTAATA  
CTAATAATAACGAGTGATCGTGATGAAGTGAAGAAGTGGCTTTGATACGTTATTCACAACAACCCGATTTTTCTGTCGGGAT  
ATAATCAAAGGATCCATGCGCGCTCAAAGACGTAAAATTTGTTATTTGGGAAGTGTTCGAAAGTTCGAAAGTTCATTTTTAGGAATTGTA  
TTTTTTGGACAAAAATAGACAAAACCTTTTTTTTTTTCTTTTGTATCTCCGAAATGACGAAGTTCATTTTTAGGAATTGTA  
TGGGGAAAAATACAAAATTTGAAAACCTTCGGATCCTGAGGAGAAAAGAAAAAAGGAGAAAAAAGAAGAAAATGAGCGAATA  
GCAGTAGCAGAGACCTGGGATAGTATTCTATTTGCTCAACCAATAAGGGGTTTCGATGTTAGTAACCCAATCAATTCTTAG  
AAAATATATTGTATTGCCTTTATTGATAATAGCTAAAAATACCGCCCCTATCTTATTATTTCAATTTCCCGAGTGGTTTCG  
AGGATTGGGAAGAGTGGAAATAGAGAAATCCACGTTAAATGCACTTATAACGGTGTTCATTATCAGAAAACCGAATTTCCG  
AGAACTGGTTAAAAGACGGTATTTCAGATAAAGATTCTATTTCTTTTGTGTCTGAAACCTTGGCACAGATTTAAGCTACG  
ATCCCATCATAGAGGTCCAATGAAAAAGAAAGGAAAAAAAATATAATTTTTGTTTTTAAACAGTCTGGGGAATGGAAACAG  
AACTTCTTTTTGGTTCTCCCCGAAACCAACCGTCTTTTTTTGAACCCATTTTAAAAGAAGTTCGAAAAAAAATTAGAAAG  
GTGAAAAATCAATTTTTTTCGAATTTCTAAGAGTTGTAAGAAGAAAGAACAAAATGGTTTTCTAACGGTCTTAAAAGAAAAAA  
AAGATGGGTTATCGAAATAATTTCTATTTATAAAAAGAATAATGAAAGAAGTTCGAAAAATAAATCCAATTTCTATTATTTG

GATTAAGAAGTATATGAATCGAGTGAAAATAAAAAATAGAAAAAATTCACAAAATTTCTATAACTATAATTAGTAATCAG  
ATTATTCATGAATCGCCATTTCGAATTAGATCCACGGATTGGACAAATTATTATTACTGACAGAAAAAATGAA  
GAATCTGGCTGATAGGACAAGCACAATCAGAAATCAAATAGAAAGAATCACAAAAGACAAGAAAAAATATTTCTAACCC  
CAGAGATAAATATTAGTCCTAAAAAATGAGTTGTGGTGATAAAAAGATCAGAATCACTGAAAAGTTTTTGGGAGATAGTA  
AAAAAAGAAGTATCCGTTAATACGTAAATGGCATTTTTTTTTTGAAATTTGTCATTGAAAAGATATACCTTCTATGTAT  
CATTAATATTTCCAGGATCAATGCACAACCTTTTCCTTGAATCAACAAAAAATTTCTTGATAAATACATTTACAATTACA  
ATGATGAAACAAATCAAGAAGAAATTGATGAAATAAATCAAAAAAATTTCACTTTATTTTCGACTATAAAAAAGTCGCTT  
TTTCATATTAGTAATAATAATTCACAGATTTTTTGTGACCTATCCTCCTTATCACAAAGCATATGTATTTTACAATTATC  
ACAAACCAAAGTTATTAACAAGTATCACTTGAGATCTGTACTTGAATATCACGAAAGATCTCTTTTTCTTAAAGATAGAA  
TAAAGGATTATTTTGAACACAAGGAATATTTTCAATTCGAATCAAGGCATAAGAACTTCGAAATCTGGAATGAATGAC  
TGGAAAACTGGTTAAAGGGTCATTATCAATATCAATACGATTTATCTCAGACTAGATGGGCTAGATTAGTACCACAAAA  
ATGGCAAAATAGAGTCAATCAACGTCGTACAACCTCAAAATAAAGACTCAAAAAAATTAGGTTTATGAAAAAGACCAAT  
TAATTCATTACCAAAAAAATGATTATGCAGTGGAGTTATTATCGAATAAAAAAGAAAAATTAAAAAAACAACACTACGGA  
TATGATCTTTTATCACATAAATATATAAATTTATGAAAATAAGAAAGACTTATATATTTATAGATCACCTTACAAGTAAA  
CGAAGGCCGAGAAATTACCTATAACTACCCACACATAAACTTGAATCATTTTGTGTGCTGGGGGGTATACCTATTAGGG  
ATTATCTAGGAGAAGATTATATTATTGAGACGGATAAAAAATCCGGATAGAAAATATTTTGATTGGGGAATTCTCCATTTT  
TGTCTTAGAAAAGAGGTCGATATTGATACCTGGACCAATATGGATACCGAGGCCAGCATTATAAAAAAGACTAAGACTGG  
AACTAATTATTCTCAAATAGTGGAGAAAATTAATAAAAAAGATCTTTTCATGATTTCATGAAGAAATCAACCCATCCAATC  
AAAAAACAACCTTTTGAATGGATGGGAATGAATGAAGAAATACTAAATCGTACCATATCAAATCTGGAACCTTTGGTTC  
GTCCAGAAATTTTGTACTTTATGATACATATAAGATGAAACCATGGGGCATAACCAATAAAATTAATCTTTGTAATTT  
GAATGGAAATGAAAATGTTAGTGAATAAAAAACATTAACAGAAAACAAAAAATTTCTCCTCTATCATCTAATAAAAA  
ATAAAAAAATCTCTTGAATTAGAGAATCGAAATCAAGAAGAAAAAGAATCTTCGAGCCAAGGAGATCTTGGATCAAAT  
GCACAAAACCAAGGAATCTTGGACCAATGCACAAAACCAAGGAATCTTGGATCAGTTCTACCAAATCAACAAAAA  
TCTTGAAGAAGATTATGCAGGATCGGACATTAAAAAAGTTAGAAAAGAAAAACAATTCAGAGCAAGGCAGAAGTGGAAAC  
TGGATTTATTGCTGAAAAAATATTTGCTTTTTCAATTGAGATGGAATGGTTCTTTGAATCAAGAATATTGAATAATATC  
AAGATATATTGTTTCTGCTTAGATTGATAAATCCAAAGGAAATTAATATATCCTCTATTCAAAAAGGAG

Populus GCATCTAGCATTGGGTAGACCTCATAACAATAACTGTCCTAGCTCTACCGTATCTTTTGTTCAT--  
----TTCTTCTGGAACAATCACAAACACTTTTTTGTAT-----TATGGATCTACTACC-----

AGAAATTC AATGCGTAATCTTAGCATTCAATGTGTATTCTGAATAATCTCATTTTTTCAATTATTCAACCATTTTCATTTT  
ACCAAGTTCAATGTTAGTCAGATTAGTCAACATTTATATGTTTTCGATGCAACAACAAGATGTTATTTGTAACAAGTAGTT  
TTGTTGGTTGGTTAATTGGTCACATTTTATTCATGAAATGGGTTGGATTGATATTAGTCTGGATACAGCAA---  
AATAAT-----TCT-----CTTAGATCGAATGTACTTATTCGATCTAAT-----  
----AAGTAC-----CTTGTGTCAGAATTGAGAAATTCTATG-----  
GCTCGAATCTTTAGTATTCTCTTATTTATTACCTGTGTCTACTCTTTAGGC-----AGAATACCGTCAACCCATT-----

TTTACTAAGAACTGAAAGAAACCTCAGAAACGGAAGAAAGGGAGGAAGAAACAGATGTAGAAATAGAAAACAACCTCCCGA  
AACGAAGGGGACTAAACAGGAACAAGAGGGATCCACCGAAGAAGATCCTTCTTCTTCCCTCTTTTTCAGAAGAAAAGGAGA  
ATCCTGACAAAATCGACGAAACGGAAGAGATCCGAGTGAATGGAAAGGAAAAAACAAGGATGAATTCATTTTCACTTT  
AAAGAGACATGCTATAAAAAATAGACCTGTTTATGAAACTTTTTATTTAGATGGGAATCAAGAAAATTCGAAGTTAGAAAT  
CTTTTTAGATAAAAAAGATAAAGATCTCGTATGGTTTTGAAAACCTCGTGTAACCTATTCTTTTCGACTATAAACGCTGGA  
ATCGTCCATTTTCGATATATAAAAAACGATCAATTTAAGAATGCTGTAAGAAAGGAAATGTCACAATATTTTTTTTCTACA  
TGTCGAAGTGATGGAAAAGAAAGAATATCCTTTACGTATCCACCCAGTTTGTCAACTTTTTTGGAAATGATACAAAGAAA  
GATGTCTCTGTTTACAACAGAAAACTCTCCTCTGATGAATTGTATAATCATTGGAATTATAACAATGAACAAAAAAGA  
AAAACCTAAGTAACGAGTTTATAAATAGAGTAGAAGTTCTAGATAAGGGGTTTCGTGTTCTGAATATACTCGAAAAAAG  
ACTAGATTGTGTAATGATGAAACTAAAAAAGAATACTTACCTAAAAATATATGATCCTTTTTTGGAGTGGGCTCTATCGTGG  
AAAAGTCAATTTTTTTTTTTCACCTCAATCATAAATGAAATTTCCATAAAAAAATTACATAGAGATGCTTTGGATAAATA  
AAATTTATCTTATCTTCTTATTTCTAATTATCAAGAATTTGAACCAAAAATGGAGGATCGAATAAGAATTTTAAATTT  
TTATTTGATGCAATTATAGTGGATTCCAAGAATAAAAAAATTTGTAAAAAAATCTACAGAAAATAAAAAAGAAATAAGTAA  
ACAAATTCCTCGATGGTCATACAAATTAATCGACGATTTGGAACAACAAGAGGGTGAATAAGAGAACGCGGCAGAGG  
ATCATGAGATTCGTTTACGAAAAGCCAAACGTGTAGTAATTTTTACTGATAATCAAGAGAATCCTGATTCTAATACTTAT  
AATAATTCAAAACCTAAAGATAACAATAATTTTGTATCAAACAGGCGAAGTGGCTTTGATACGTTATTTCACAACAATCGGA  
CTTTTCGTCGAGATATAATAAAGGGCTCCATGCGAACACAAAGGCGCAAAATAGCTATTTTGAACCTGTTTCAAGCAAATT  
TGCATTCTCCCTTTTTTTTAGACAGAATAGACAAATTTCTTTTTTTTTGCTTTTTGATACTTCTGAGCTGATGAAAATAATG  
TTTATAAATTTGGATGTGTA AAAACGCAGAATTCACAATTTTCAAGATTCTACTTATACAGAAGAAAAAACAAGAAAGTGA  
CAAAAAAGAAAAAGAAGAAATCAAAAACAGACGAGAAGAAGACAAAAGAGAAGAGAAAGTCCGTATAGAAATAGCCGAAA  
CCTGGGATAGCATTATTTTTGCTCAAGCAATAAGAGGTTGTGTTTTAGTAATTC AATCGATTCTTCGAAAATATATTCTA

TTGCCTTCATTAATAATAGCTAAAAATATGATTTCGTATGCTATTATTTCAAATTCCTGAATGGTCCGAGGATTTAAAAGA  
TTGGAATAGAGAAATGCATGTTAAATGCACCTATAATGGAGTTCAATTATCAGAAACAGAATTTCCGAAAACTGGTTAA  
CAGACGGTATTCAAATAAAGATCCTATTTCTTTTTCGACTACAACCTTGGCACAGATCTAAGTTTTAAATTTCTTTCTAAA  
GATCCAATAAAAAAGAAAAGACAAAAAATGATTTTTGTTTTTAAACAGTTTGGGGAATGGAAGCTGAACCTCCTTTTTGG  
TTCTCCCCGAAAAGAGCTTTCACTTTTTGAACCTATTTTTAAAAAACTAAAAAATAATAGAAAAGTTGAAAAAATG  
GTTTTCTAACTCTAACAATTTTTAAAAGAAAAAGAAAACCTATTTCTACATTTACCGAAAAGAAAACAAAAAATGGTTTCATC  
AAAGGTATTCTATTTCTAAAAGAAATAATAAATAAATTTCAAATCAAAAAGAAATCCAATTCTATTATTTGGATTTAG  
AGAAGTATATGAATTAATGAAACTAAAAACGAAAAAATTCACCAATCAATAATCGGACTATTCATAAATTTCCACTT  
CAATTCGATCTATGGATTGGATAAACTATTCCTGACAGAAAAAATAATGAAAGATCTGAATGCCAGAACAAGACAATA  
AGAAATCAAAATAGAAAAAATTACAAAAGAAAAGAAAAACGATTTCTAATCTCAGAAAAGAAATATTAGTCCTAACAACT  
AAGTTATAATGCTAAAAGATTAATAATTAATCATCAAAAAATATTTTACAGATATTA AAAAGAAAACAATGCTCAATTTAG  
TCCGTAATCATATTTTTTATCAAATTTTTGATTGAAAAGATATATATAGATATCCTTTCTAGCTATCATAATATTCCG  
AGGATCAATGTACAGTTTTTTCTTGAATCACCAAGAAAAATGATTAATAAATACATTTATATGTATAATAAAAAAGAAAA  
TAACAAAAGAATTGATAAAACAAATCAAATACACCAATTCCTTTATCTCGATTATAAAAAAGGCATTAAATTATAGTA  
ATTTTAATAAGAACTCGAAGATTTTTTATAACATAACCTCCTTGTCAAGCGTATGTATTTTACAAATTATCACAAGTC  
CAAGTTATTAACCTATATAAGTTAAGATCTGTCTTCAATATCATGGAGCATCCCTTTTTCTTAAGAATGAAATAAAAAGA  
TTATTTTGGAGTCCAAGGAAGATTTTCAGTTCAAATTTAAAAGATACAAATTTTAGAAATCTGTAATGAATGAATGGAAAA  
ACTGGGTAAGAAGTAATTATCAATATAAATACGATTTATCTCAGATCAGATGGTCTAGCTTAATATCGCAAAAATGGCGA  
AATAGAATGAATCAACAGCATATGATTCAAAATAAAGATTTAAATAAATGGAATTTATATGACAAAGACCAATTAATTCA  
TTATGAAAAACAAAATAATTTTGAAGTAGATTTCATTATCGAACCAAAAGATAATTTTAAAAAATACTATAGATATAATA  
TTTTATTATATAAATCCATTAATTATGAAGATAAAAAAGACTCATCTATTTATGAATTACCATTCCAATTAATAATAAG  
CAAGAGCTTTTTTATAATTACAAAATAGATAAAAGGAAATTTTATGATATGTCGGGAGGTATCCCTGTCAATAAGCATCT  
AACAGAAGATGATATTATCGATACGGAAAAAGCTCGCATAGAAAATATTTGGATTGGAGAATTCTTTCATTTTGGTCTTA  
GAAAGAAAGTGCATATTGAATCCTGGATCGATACCGGAACCAAAACAAAAAATACTTTTTGATTGGATGGGAATGAAT  
GAAGAAATACTAGATCGTCCCACATCAAATTTAGAATTTTGGTTCTTTCCAAAATTTGTGATACTTTGCAACGCATATAA  
GATAAAATCATGGGTGATACCAATCAAATTTACTTTTTTAAATTTTAAATGGAACATAAAATGTTAGTAAAAATAAAAAA  
TCAACAAAAGAAAATAATGATCCTTTTATATCTATATCATCAAATGAAACAAAATCCATTCAATTAAGAATCAAAT  
CTGAAGAAGAAAAGAGTGAAGGATCAAGTAGATCTTGAATCAGTTCTAGTAAACCAAGAAAAGATGTTGAAGAAGATTA  
TGTAAGATCAGACAGCTAAGAGCGGTAGAAAAGAAAAGCAATACAAAAGTAATACGGAAGCAGAACTTGATTTCTTGCTAA  
AAAGGTATTTATGCTTTCAATTAAGATGGGATGATTTCTTAAATGAAAAAATAATCAATAATAAAAAATATATTTGTCTC  
CTGCTTAGATTGACAAATCCACGAGAAATTATTATATCCTCTATTCAAAGGGGAGAAGTGAAGCCTAGATATTCTAATGAT  
TCAGAAAAGATTTAACTCTTACAGAATTGATGAAAAAGGGAATATTGATTATCGAATCAACCCGCTGTGCGGTAAAAAATG  
ATGAAAAATTTATTATGTATCAAACCATAAATATTTTTATTGGTTTCATAAGAGAAAACAACAAATTAATCAAAGATACAGA  
AAAAAAACTATATTGATAAAAAAGAAATTTTACCGAATCTATTGTAATAAATCAAAGTTTAACTAGAAATA

Ranunculus GCATTTAGCGTTGCGTAAACCTCATAACAATAACTGCCCTAGTTCTACCATACCTTTTTGTTTTCAT--  
----TTCTTCTGGAATAATCACAAAACTTTTTTGAT-----TCTGTATATACTACC-----

GGAAATTC AATGCGTAATCTCAACATTCAGTGTATATTTCTTGAATAGTCTCATTTTTTCAATTATTCAACCATTTTCATTTT  
ACCAAGTTCAACGCTAGCCAGATTAATCAACATTTATATGTTTCGATACAACAACAAGATGTTATTTGTAGCAAGTAGTT  
TTGTTGGTTGGTTAGTTGGGCACATTTTCTTCATGAAATGGGTTGAGTTGGTATTATTCTGGATACGACAA---  
AATCAT-----TTG-----ATTAGATCGAAT-----  
----AAGTAC-----CTTGTCTCAGAATTGAAAACTCTATG-----  
TCTCGAATTTTTAGTATTCTATTATTTATCGTCTGTATCTACTATTTAGGC-----AGAATGCCATCGCCTCTT-----

GTCACTAAGAACTAAAAAATACTTCAAAAAGAGAAGAAAGGGGTAAAAATAAAGAAGAAAACAGATGTAGAAAATAGAAAA  
AATTTCCGAAGAGAAAGGAACCTAACGAGCAACAAGAGGGATCTGCCGAAGAAGACCCCTCTCTTTGTTCCGAAGAAAAGG  
AGGGTCTGGACAAAATAGATGAAACAGAAGAAAATCCAAGTTAATTTGAATGGAAGGGAAAAACAAGGATGAATTC AAC  
AAAGAGAAAATACTCTAAAAATAGCCAGTTTGTGAAAATTTATGATCTTGATGGAAATCAAGACAATTTTGTAGTTAAAAA  
AAAAGAGAAAAGAAAAGAAAACATTTTCTGGTTTGA AAAACCCCTTGTGACTCTTCTTTTTCGACTATAAACGCTGGAATC  
GTCCATTGCGTTATATAAAAAATGATTTTTTTGAGAACGCTGTAAGAAATGAAATGTCACAATATTTTTTTTATACATGT  
CAAAGTGATGGAAAACAAAAGATATCTTTTACATATCTGCCAGCTTGTCAACATTTTGGAAATGATACAACAAAAGAT  
GCTTTTGTGCATTACAGAAAACGATCCTATGAAGAGTCAATAATAATTTGGGTTTATACCAATGACGAAAAGAAAAA  
ATCTAAGTAACGAATTTTTAATCGAATAGCAGTTCTAGACAAGGGGTTTCTTGTACGGATGTACTCGAAAAAGAACT  
AGATTGTGCAATTATGAGAATGAACAAGAATGCTTACCAGAAAATTTATGATCCTCTTTTGAACGGACCCTATCGTGGAA  
AATTAAGAATTGACTCGCGTTCAAGCATGAACGAGTATTTAATACCTTCGATAGAAGATCCAGAGACACTATTTGGA  
TAAATAAATTTTATGACATCTTTCTACGGATTTTAAAGAATTA AAAAATAAATAAATTTGGAAAAGAAATAAATGAAATA  
AAAAAAAGGTTTTTTCAGTGGTCATACAAATTAATTGATGATTTGGAAGAAGAGGAAGAGGAGGAAGAGACAACCGAGGA

TCGCGGTATTTCGTTACAGAAAAGCCAAACGTGTAGTTATTTTTAATGATAATGAAACGACTAAAAATAACGCCAGTAATC  
GTGATCAAGTAGACGAGGTCGCTTTTGATAAGTTATTCACAACAATCAGATTTTCGTCGAGACATAATTAAGGATCCATG  
CGTGCTCAAAGACGGAAAACCGTTACTTGGAAAGCTGTTTCAAACAAGAGTACATTCGCCACTTTTTTTGGACAGAATAGA  
CAAAATTTTTGTTTTATCTTTTGATATCGACCGAATATTGAATTTTCATTTTCAGGAATTGGATGGTGGAGGTCACAGAAT  
TTAAAATTATGGATTTCGGAAGAGCAAAAAGGCGAAAAAAGATAAAAAAGAAAAAGGAAAATGAACGTATAACAATAGCA  
GAACTTTGGGATACCGTTCTATTTGCTCAAACAATAAGGGGTTGTATACTAGTAATTCATCAATTCTTAGAAAATTGAT  
AGTATTGCCTTCGTTGATAATAGCAAAAAATATTGGGCATATGTTAGTATTTAAACCCACCGAGTGGCATGAAGATTTTCG  
AAGAGTTGAATAAAGAAATTCATGTTAAGTGCACCTATAATGGTGTTCATTTATCAGAAAACGAATTTCCAAAAAATTGG  
TTAACCGACGGGATTTCAGATAAAGATCCTATTTCCCTTTTTGTCTAAAAATCGCGGCACCGATCTAAGCTACAACCTGAAGA  
TTCACGTGAAAAAGAAAGGGAAAAAACAAAAATTTTTATTTTTAACAGTTTGGGGAATGGAAGCAGAATACCCTTTGGTT  
CTCCCCGAAAGGACCCCTCCTTTTTTTGAGACTATTTGGAAACAATAAAAAAACAATAAAAAAGTAAAAAGTAAAAATG  
TTTGTAGCTGTAATAAATATAAAAAAGAAACAAGTGGTTTGGAAAAGTATCAAACGAAAAAACAAAAATGGGTTACAAA  
AAAAGTGCAATTTATAAAAAAATAAATGAAAAGAACTTACAAAAAGAAATTCATTTTCATTTTGAATTGAAGAAAGTAT  
CTGAATCGAATTCAAATAGAAATAAAACGAAAAATTTTCGATAATAAGCAATAAAATGATTCCGGAATTCGCCATTTCGA  
ATTCGATCCATTGATTGGACAAATTATTCCTGACAGAAAAAATGAAAGATATGGCTGATAGAATAAATACAATTTCG  
AAATCAAATCGAAAAATAACAAAAGACAAGAAAAGTATATTTCTAACTACAACACAGATAGAAACATTTCGTCTAACA  
AAACAAGTTGGGATGATAAAGATTAGAACAGTCGAAAATTTTTTGGCAGATAGTAAAAAGAGGAAGGGCAAAAAATAATA  
CGCAAATGTAACCTTTTTTTTTTCATTTTTGTATTGAAAAGATATGCATAGATATCTTTTTAAGTATCATTAAATTCCTTC  
CAGGAATATACAAATTTTATTTCAACAAAAAATAAATTAATGATAAATACAGTTACAATGATGAAACAAAAAATAATC  
CAATTCATTTTTATTTTCGACTATAAAAAGATCAATTTATAAGACTACTAATACTAGTAATAAATCGCAGATTTTGTGTGAC  
CTTTCTTTTTTTGTCAACAAGCATATGTATTTTACAAATTATCACAAATACAAGTTAGTAACAAGTATAACTTAAAATCCTT  
ATTTCAATATCATGGAACAATTCCTTTTTATTAAGGATAAAAATAAAGATTTTTTTTTGGAACACAAGGAATTTTTAATTCCG  
AATCAAGACATAAAAAATTTTCACGATTTTGGAAATGAATGAATGGCAAAGCTGGTTGATGGGTAATGATCAATATCAATAC  
AATTTATCTCAAACCTTGCTGGTCTGGATTAGTACCGCAAAAAATGGCGAAATAGAATAAATAAAAAATTTGGCAAACCTCAAG  
CAATTTTTATTTCTATGAAAAAGAGCCATTAATTCATTACGAGAAGGAAAAAGAAATGATGAGTGAATTCATTACCGAGCC  
GAAGAGAGAAATTAAAAAACTACAAATATGATCTTTTATCAAATAAATATATTAATTATGAAAAATAATAGTAGCTCATCT  
TTTTATGGGTTACCATTAGAAGTAAATCAGGCCACGCGATTTTATATAATTACAATACATACAATTCCTGAAGTTTTTGA  
TTTGTCTGGGAGATATAGATTTTTCTGTAATTATCTAAGAGAAGATTTATGATATGATAGAGATCAAAATTCGGATAGAAAAT  
ATCTTGATTGGAGAATTTTTAATTTTTGTCTTAGAAAAAGCGCAATATTGCGGAATGGACAAATATTGATATCGGAACC  
AGCACCACCTACTAAAAAATCAAGTCTCAAATTCATTTATTCAGATAATAGACAAATGGAAAAAATAAAACAGA  
TAATAAGGGTTTTCTTAATCTCGCAATTTATAAACAAATGACTCAGCCAATCAAACAAAAGTCTTTTTTGGACTGGATGG  
GAATGAATGAAGAAATACTAAATGGTCTATATTGAATCGAGAACTTTGGTTTTTCCAGAATTTCTATTACTTTATGAT  
GCATATAAAATTCACCTTGGATCATACCCTTAATTTGCTTCTTTTTAAATTAATATAAATGAAAAGCAAAAAGGGGA  
TCTTCATATATCATATAATAAAAAATAAATCTCTTGACTTAGAGAATAGAAATCAAGAAGAAACGCAACAGCCCGTCCGAG  
GAGATCTTGGATCATATGTACAAAAGGAAAAATAATCCAGGATCTGATCCATTAAAAAACAAACAGATGGTAAAGAAGAT  
TTTGATAGATCAAACATTCAAAGGAACATAAATAAAAAAATCGAAGAGCAACATAGCAGCAGAATTGGATTTCTTCTCCT  
GAAAAAATATTTCTTTTTCAATTGAGATGGGATAATTCCTTTAGCGAAAAAATAATTAACAATATTAAGATATATTGTC  
TACTCCTTAGATTGAAAAATCCAAAGGAAATTCGATATCCTCTATTCAAAGAGACGAAATGAGTATGGATGTAATGCTG  
GTTCCGAAAGCTACAACCTTTTATAAAATTTGAGAAAAAGAAGACTCTTGCTTATTGAGCCAGCTCGTCTATCCATAAATTG  
GGATGGGCTGTTTATAATGTACCAAACCTTAGTTATTTTGCAGGTGCATAATAGTAAGTATCAAACATGTAAAAAAATA  
TAAATGTTGATAACAAGGGTCTTATTGAATCCATGGCAGCAGATGAAATTTGTTTAGGAATCGAGACAAAAATAATTAT  
GATTTTCTTATTCTGAAAATCTTTTATCTTCCAGACGTCGTAGAGAATTGAGAATTCAAATTTGTTTAA  
Spinacia GCATCTAGCATTGGGTAGACCTCATAACAATACTGTCTAGCTCTACCCTATCTTTTTGTTTCAT--  
----TTCTTCTGGAACAATCACAACACTTTTTTTGAT-----TATGGATCCACTAGC-----  
-----  
AGAAATTCATGCGTAATCTCAGCATTCAATGTGTATTCTGAATAATCTCATTTTTCAATTATTCAACTATTTTCATTTT  
ACCAAGTTCAATGTTAGCCAGATTAGTGAACATTTATATGTTTCGATGCAACAACAAGATGTTATTTGTAACAAGTAGTT  
TTGTTGGTTGGTTAATTGGTACATTTTATTGAAATGGGTTGGATTGGTATTAGTCTGGATACAGCAA---  
AATAAT-----TCT-----ATTAGATCTAAT-----  
----AAGTAC-----CTTGTGTCAGAATTGAGAAATTCTATG-----  
GCTCGAATCTTTAGTATTCTTCTTTTATTACCTGTGTCTACTATTTAGGC-----AGAATGCCGTACCTATT-----  
-TTTACTAACAACTGAAACAAATGCTA-----GAAACGAACGAAATTGAGGAA-----  
-----  
GAAACAAATTTAGAAATAGAAAAAATTCGAAACGAAGGAGACTAAACAGGAAGAAGAGGGATTCCACGAAGAAGATCC  
T-----TCTCCTTCCCTTTTT---TCGGAAGAAAAGGAGGATCCGGACAAA---  
ATCGATGAAACGGAAGATCCGAGTGAATGGAAAGGACAAAACAAAGGATGAATTCCACTTA-----  
AAAGAAGCATGCTATAAAAAATAGC-----CCA-----

-----ACTTCTTATTC---T-----GGGAATCAAGATATTTTCTGAAGTTAGAAATACTT---AAA-----  
-----  
AAAGAAAAGAAAATCCTATTCTGGTTTTCAAAAACCCCTTATTTTTCTTCTTTTCGACTATAAACGTTGGAATCGTCCAAT  
GCGATATATAAAAAACAAT-----CGGTTTGAA---AATGCGGTAAGA-----  
AATGAAATGTCACAATATTTTTTATAACATGTCAAATGATGGAAAACAAAGAATTTCTTTTACATATCCACCTAGTTT  
ATCAATTTTTCTGGGAAATGATACAAAGAAAG---ATTTCTTTG---  
GCTACAACAGAAAATTCTTATATGATGATGAACTATACAATTATTGGATTTATACGAATGAACAAAAAAAAC-----  
-  
AGCTTAAGCAATGAATTTGCTAATAGAATTACAGTTCTAGACAAAAGGACTTTTTTATATAGATGTACTTGATAAAAAAAC  
TAGATTATGTAA-----AAGTAAAAATGAA-----  
TATTTACAAAAAGACCATGATCCTTTTATAAATGGATCCTATCGTGGTATAATAAAAAAACTCTTTTACCTTTTATAAA  
TAATGATGAA-----ACTACA---  
GTAAAAAAATTAATAGATGAAATTTTTATAAATAAAATTCATAGTGTCTGGGTAATTGTAATAAT-----  
TACCAGGAATTTGAATATAAAAAAGATCCATTTAAGAAAAACCCAATATCATCAAAAATT---  
AGACATTTTCGTAACCTTAATGAGTCAATTTGATGGAGAATCAACATTCAATCAAAAAGGG-----  
-ATTTCTTTACTTTTTCAGAACACAAACAAATTTGTTTCAGAAGATCCAGAAATATTTTTTCAA-----  
-----TTTTTAGTTGATACAATCATAGCGGATTCTTTTACTCAA-----ACAATTCAAAA-----  
GAATCGATTGGAATAAAAGAAATAAGTAAAAAGGTTTCTCATTGGTCATACCAACTAATTGATGAATCC-----  
GAACAAGAGGAAATGGAAAATGAAAAACAA-----G-  
TATCATGGCCTCATCAAATTCGCTCAAGGAGCGGAAAAGAAGTAGTTTTTTTTTACGGATAAACAAGAAAATACCGACAAT  
CCTACCCCTAATACTGCTGAT-----ATATCT-----  
-----  
-----GAGCAAGCGGACGAA-----  
GTGGTTTTGACACGTTATCCACAAGAATCTGATTTTCGTCGAGATATAATCAAAGGTTCCATGCGTAGTCAAAGACGTAA  
AATAGTTATTTGGGAATTGTTTCAAGCAAATATACATTCCCCACTTTTTTTAGACAGA---ACGAAT---  
AAATCCTCTTTTTTT---TCTATT---ACTTTTTCCAGATTAATTTAA-----CGAATTTTTAAAAATTATATGGGA--  
-AAAAACCCAGAATTGGATATTTCTAATTATAAAGAAGAAGAATTAATAAAAAAAGAAAAAGCTAAAAGAGCAC-----  
-----AAAAAAGACAAAGAAAAA-----  
CAAGAACAATACGACTAGACATAGCCGAAACTTGGGATACTATTCCAGGTGCTCAAATAATAAGAAGTTTGATATTACT  
AACTCAATCAATTCTTAGAAAATACATTCTATTGCCTTTATTGATAACAGGAAAAAATATCGGTGCTATATTATTATTCC  
AACTTCTGAGTGGTTCGACGATTTCAAGGAGTGGACTAGTGAATGCATATTAATGTACCTATAATGGTGTTCATTA  
TCAGAAAAAGAATTT---  
CCTAAAAACTGGTTAACAGATGGTATGCAGATAAAGATATTATCTCCTTTCTGTCTAAAACCTTGGCATAAATCTATGAT  
ACGACCTTATCAT-----CAAGATAAAAAAAGGAACAAAATCAA---  
ATAGATGCTTTTTGC---TTTTTAACAGTTGTGGGATTAGAACTGACATCCCTTTT---  
GGTCTCCCCGAAAACGGCCTTCTTTTTTTCAACCTATTTTTTAAACAACCTCGACAAAAAATTGAAAA---  
CTTATAAAAGGAACTTCCAAGTTTCGAAAAAGACTAAAAGAAAAAATTCTATTTTTTCTA-----  
AAGTTACAAAATGAAACAAACAATTGGATTATTGAAATCTTTCCT-----TTTTTAAAAAATAATACGA--  
-AAAATGTCAACCGTAAAT-----ACAATTGGAGTATTTGGGTTGAAAGAA-----  
GCATCTAGTGAAATAAAAAGTGAAAA---GAT-----TCA-----AGAATCAA---AATCAT-----  
-ATGATTCATGAATCATCCGTTCAA-----ATTCGATTCTTGAATCAGACAAATTCT-----  
TCAGTGACCGAAAAAATGAAA---GATTTGGCTAATAGAACAAGGATAATTAATAAATAAGAAAAAATT-----  
-TCAAACGACAAA-----  
CTAAAAATGAGTCCTAAGAAAACCTCGTTATGGTACGAAAAATTTG-----GGTCAGATATTA---  
AAAAGAAGAAATGCTCGATTAATCCGTAATTCAAATTATATTTGAAATTTTTT-----  
AGGAAAAGGATATACGGAGATATATTTCTATATATCATTAAAT-----  
ATTCCCAAATTAATACACAACCTTTTTCTTGAATCA---ACAAA-----  
AATGGGATTGATAAATCAATTTACAAT-----AATGAA-----  
AGTATTACTAAAACAAATAAAAATAGAATTCAGTTTATTTCAACTATAAACAAA---AAA-----  
TTTTTACCTTTTCTTAGTACTAGTAAAAATAATTCAAAG---ATTATTTCA---  
GATTTTTCTTTTTTGTACAAAGCCTATGTATTTTACAAATTATCCCAAGCCAAAATTCTTAACTTA-----  
TATAAGTTAAGATTAGTCTTTCAGTATCGTGA-----ATATCTTTATTTCTTAAAAATGAAATAAAGATTTTTTT--  
-----GGAACCTAAGGAATAACTAATTCGAGTTAAAGACT-----AAAAACTTCCG-----  
AATTCGGAATGAAC-----CAATGGAAAAACTGGTTAAAATTGAAAAATAAT---TAT---CAATAC---  
AATTTATCTCAGCTAAAATGGTCTCGATTAGTACCACAAAATGGCGAAATAGAGTAACTGAACATTGTGAGGTTGAAAA  
TACA-----AATTTATATCAA-----AACGAAGAATTAATTAATTCAAAAAGCATTTA-----







-----  
-----  
-----  
-----  
-----  
-----  
-----  
-----  
-----  
-----  
-----  
-----  
-----

Vitis GCATCTAGCATTGGGTAGACCTCATAACAATAACTGTCCTAGCTCTACCGTATCTTTTGTTCAT--  
----TTCTTCTGGAACAATCACAACACTTTTTTGGAT-----TATGGATCTACTACC-----

AGAAATTC AATGCGTAATCTCAGCATTCAATGTGTATTCTGAATAATCTCATTTTTTCAATTATTAAACCATTTTCATTTT  
ACCAAGTTCAATGTTAGCCAGATTAGTCAACATTTATATGTTTCGATGCAACAACAAGATGTTATTTGTAACAAGTAGTT  
TTGTTGGTTGGTTAATTGGTCACATTTTATTATGAAATGGGTTGGATTGGTATTAGTCTGGATACGGCAA---  
AATCCT-----TCT-----ATTAGATCTAATGTACTTATTCGATCTAAT-----  
----AAGTAC-----CTTGTGTCAGAATTGAGAAATTCTATG-----  
GCTCGAATCTTTAGTATTCTTTATTATTACCTGTGTCTACTATTTAGGC-----AGAATACCGTCACCCATT-----  
-CTTACTAAGAAAATGAAAGAAACCTCAGAAACGGAA---GAAAGAGGGGAAAGTGAGGAA-----

GAAACAGATGTAGAAATAGAAAGAACTTCCGAAACGAAGGGAATAAACAGGAACAAGAGAGATCCACCGAAGAAGATCC  
T-----TCTCCTTCCTTTTT---TCGGAAGAAAAGGAGGATCCGGACAAA---  
ATCGATGAAACGGAAGAGATCCGAGTAAATGGAAAGGAAAAAACAAGGATGAATTCACATTT-----  
AAAGAGACATGCTACAAAAATAGC-----  
CCAGTTTATGAA-----ACTTCTTATCTGGAT-----  
GGGAATCAAGAAAATTGCAAGTTAGAAATACTTAAAGAA-----  
GATGAAGATAATAAAAAACAAAAATGGTTTGAAAAACCCCTTGTGACTCTTCTTTTTGACTATAAACGATGGAATCGTCC  
ATTGCGATATATAAAG---GCTCGATTTCAAATTTAAA---AAAGCTGTAAGA-----  
AATGAAATGTCACAATATTTTTTTTTTATACATGCCTCAGTGTGAAAAACAAGAATATCTTTTACATATCCCCCAGTTT  
GTCAATTTTTTTGGAAATGATACAAAGAAAG---ATGTCTTTG---TCCACAACAGAAAGACTCTCCTATGACGAA---  
CTATATAATCATTGGATTTTATAACCAATGAACAAAAAGAAAAC-----  
ACACTAAGAAAGGAGTTTATAACGAGAATCGAGGCTCTAGACAATGGATCGCTTACTCTGGATGTACTGGAAAAAAGAAC  
TAGATTGTGTAATGATGCAACTAAAAAAGAA-----  
TACTTGCCATAAATATATGATCCTTTCTTGAACGGACCATATCGTGGAACAATCAAAAAAATGTTTTTACCTTCAATCAT  
AAATGAA-----ACTTCC---  
AGAGAAAATTCCATAGAGAAGTTTTCGCATAAATAAGATTTACGGTATCCTTTTTGCTATTGAT-----  
TATCGAGAATTTGAA-----CATACATTTGATAGAAAATCATTATCAACAAAAATT---  
GGTTATTTTTTTGAACTTAATCAATCAATTTACTATAGAATCACCATCCAATTTGAATTTG-----  
AAAAGACTTTTCGTTATTTCCAGAA-----CAAGGAAAAGTTGATTTCAGATTTCAGAAGATCAAGCAAAAATTTTTAAAT--  
-----TTTTTTTTTCGATAGAGTTATAACTGACCCCAAGGATCAA-----  
ACAATTAGAAAA-----  
AAATCTATTGGAATAAAAGAAATCGATAAAAAAGTCCCCGATGGTCATACAAATTAATGAAG---AAT-----  
GAGGAGGAAGGAGAAACTTTA-----  
GTGGTGTACCAGGAGATTTCGTTCAAGAAAATCCAAACATGTAGTGATTTTTTACCGATAATCAACAGAATGCCGATACTTA  
TACTGCTAACGCTAACAAAGGATATTGATAATTCT-----

-----GAGCAAACAAACGAA-----  
GTCGCTTTGATCCGTTATTCACAACAATCGGATTTTCGTCGAGATATAATCAAAGGCTCCATGCGCGCTCAAAGACGTAA  
AATAGTTATTCGGGAATCTTTTCAAGCAAATGTACATTTCCCCCTTTTTTTGGACAGA---ATATAC---  
AAACCCATCTTTTTT---TCTTTT---GATATTTCTGGATTGATAAAA-----CTCATTTTTTGAAAATTGGAAGGAG--



Blank lined writing area consisting of 30 horizontal dashed lines.

Zea

Blank lined writing area consisting of 15 horizontal dashed lines.









TGGCTTCTCCCAATAACTAAA-----AAG---  
TGTATCATGCCTGAATCTAACTGGGGTTCGCGGTGGTGGAGGAACCGGATCGGAAAAAGAGGGATTCTAGTTGTAAGAT  
ATCTAATGAAACA-----  
GTAGCTGGAATTGAGATCTCATTCAAAGAGAAAGATATCAAATATCTGGAGTTTCTTTTTGTATCCTATACGGATACGGA  
TGATCCGATCCGCAAGGACCATGATTTGGAATTGTTTGATCGTCTTTCTCCGGGAAGAAGCAAAACATAATCAACTTGA  
AT-----  
TCGGGACAGCTATTTCGAAATCTTAGTGAAACACTTGATTTGTTATCTCATGTCTGCTTTTTCGTGAAAAAGACCAATTGA  
A---GTGGAGGGTTTCTTCAAACAACAAGGA---  
GCTGAGGCAACTATTCAATCAAATGATATTGAGCATGTTCCCCGTCTCTTCTCGGGAAACAAAAACAAGTGGGGTATTTCT  
TTTGCAAAATTGCGCTCAATTTTCATATGTGGCAATTCCACCAGGATCTCTTCGTTAGTTGGGGGAAG---  
AATCAGCACGAATCGGATTTTTTGGAGAAC---  
GTATCGAGAGAGAATTTGATTTGGTTAGGCAGTATGTGGTTGGTAAACAAGGATAGGTTTTTTTAGC-----  
-----  
-----  
AAGGTACGGAATGTATCGTCAAATATTCAATAC-----GATTCCACAAGATCT-----  
ATTTTCGTTAAAGTAACGGATTCTAGCCAATTGAAAGGATCTTCT---GATCAATCCAGAGATCATTTCATTCC---  
ATT-----AGTAATGAGGATTCGGAATATCAC-----  
ACATTGATACATCAAACAGAAATTGAGCAACTAAAAGAAAGATCGATTCTT---TGGGATCCTTCC-----  
TTTCTTCAAACGGAACGAACAGAGATAGAATCAGAT-----CGATTCCCGAAATGCCTTTCTGGATATTTCTCA-----  
-ATGTCCCGG-----CTATTCACGGAACGTGAGAAGCAGATGAATAATCATCTGTTTCCGGAAGAA-----  
ATCGAAGAATTTATT-----GGGAATCCTACAAGATCAATTCGT---  
TCTTTTTTCTCTGACAGATGGTCAGAACTTCAT---CTG---  
GGGTGCAATGCTACTGAGAGGTCCACTAGAGATCAGAAATTGTTGAAGAAA-----  
-----CAACAAGATGTT---  
TCTTTTGTCCCTTCCAGGCGATCGGAAAATAAGAAATGGTTGATATATTCAAGATAATTACGTATTTA  
Arabidopsis -----TTTGACATG-----  
TCTATAGGCATTGCCCTAGATAAATTGTTTAGTCTCTTCT-----TTTCTAGAAAAATATAATATTTCGGGGT-----  
-ATGGGGGAAATTCGGCATAGAAAATATTTGGATTGGAGAATTCTTAACTTTTGGTTTACAAAAAAGTA-----  
ACTATTGAGCCTTGGGTTGATACTAAG-----AGTAAAAAAAATATATTAATACTAAAGTTTCAG-----  
-AATTATCAAAAAATTGATAAAAATAACGCAGACGGATCTT-----  
-----GCTAATAAAAAAAGAACTTTTTT-----GATTGGATGGGAATGAATGAAGAA-----  
ATACTAAATCAGCGTATAACAAATTTTGAATTT---  
TTTTTCTTTCCGGAATTTTTCTTATTTTCTAGTACATATAAAATGAAACCATGGGTCATACCAATCAAATTACTTCTTTT  
AAATTTTAATGAAAAC---ATAAAT-----GTT-----AATAAAAAGATCATTGAAAAGAAAAAAGGT-----  
--TTTATACCA-----TCAAATGAAAAAGAATCCCTTCGA-----  
TTTTATAATCTGAATAAAGAAGAAAAAGAATCGGCCGGTCAA-----  
GTAGAACTTGAATCAGATAAAGAAAACAAAAAGAAATCCC---GAAGCAGCTCGATTAAACCAAGAAAAAATATTGAA--  
-----GAAAATTTTGCAGAA-----TCAACAATAAAAAAACGTAAA---  
AATAAAAAACAATACAAAAGTAATACAGAAGCGGAACCTGATTTATTTCTGACAAGATATTCGCGTTTTCAATTGCGATG  
GAATTGTTTTTTAAT-----  
CAAAAAATTCTCAATAATGTAAGTATACTGTCTCTTGGTTAGACTAAACAATCCAAACGAAATAGCGGTATCTTCTAT  
TGAAAGAGGAGAGATGAGCCTAGACATTCTAATGATTGAG-----AAAAATTTCACTTTTGCA-----  
AAATTAATGAAA-----  
AAAGGAATATTGATTATTGAACCTGTGCGTTTGTCTGTACAAAACGATGGACAACCTTATTATATATAGAACCATAGGTAT  
TTCATTGGTTTCATAAAAAATAAACACAAAATAAGTAAAAGATACAAAAAAGCTATATTAATAAAAAATTTTTTGAAA  
AATCCATT-----ACAAAATATCAAAAACAAAACGTAAATAAAAAAATAATTATGAT-----  
TTCTTTGTC---  
CCTGAAAAAATTCTATCCCCTAAACGACGTAGAGAATTTGAAATTCTAATTTGTTTCAACTTAAAAAATAAATGCTAG  
GGATACAAATTCAGATTT-----GATAAGAATATTCAAACCTTGACC---  
ACCGTTTTGCATAAAAAGAAAGATCTTGATCTTGATAAGGATAAAAAATACTTAATTAATTTAAAA-----  
TCCTTTCTTTGGCCCAATTTTAAATTAGAAGATTTAGCTTGTATGAATCGCTATTGGTTTAAATACTACTAACGGAAATCA  
TTTCAGTATGATAAGAATACGCATGTATACG---CGATTTCCAATTCCTTAA-----  
-----G-----  
-----  
-----  
-----

```
-----ATGAAA-----GGACAT-----CAATTC-----AAA-----
TCCTGGATTTTCGAATTGAGAGAAAATAGTGAGAGAGATCAAGAATGCTCACTATTTCTTA-----
GATTCATGGACCCAATTCAATTCAGTGGGATCTTTCATTCATATTTTTTCCACCAAGAACGTTTTAGAAAACCTTTGGA
CCCTCGGATTTTTAGTATCCTACTTTTTGCGCAATTCA-----
CAGGGTTCAACAAGCAATCGATATTTTACGATC-----AAGGGTGTA---GTACTATTT---
GTAGTAGCGGCC---CTTCTATATCGTATTAACAATCGAAAT---
ATGGTCGAAAGCAAAAATCTCTATTTGAAAGGGCTTCTTCTATAACCTATG-----
AATTCCATTGGACCCAGAAATGATACATCGGAAGAATCTTTGGGTCTTGCAATATCAATAGGTTGATTGTTTTCGCTCCT
GTATCTTACA-----
AAAGGAAAAAAGATCTCTGAGAGCTGTTTCCGGGATCCGAAAGAGAGTACT-----
TGGGTTCTCCCAATAACTCAA-----AAG---
TGTATCATGCCTGAATCTAACTGGAGTTCGCGGTGGTGGAGGAACTGGATCGGAAAAAGAGGGGTTTTTGTGTAAGAT
ATCTAATGAAACC-----
GTCGCTGGAATTGATATCTCATTTAAAGAGAAAGATATCAAATATCTGGAGTTTCTTTTTGTATATTATATGAT-----
-
GATCCGATCCGCAAGGGCCATGATTGGGAATTGTTTGATCGTCTTTCTCCGAGTAAGAGGGCGAAACATAATCAACTTGAA
T-----
TCGGGACAGCTATTCGAAATCTTAGTGAAAGACTGGATTTGTTATCTCATGTTTGCTTTTCGTGAAAAAATACCAATTGA
A---GTGGAGGGTTTCTGCAAACAACAAGGA---
GCTGGGTCAACTATTCAATCAAATGATATTGAGCATGTTTCCCATCTTCTCTCGAGAAAC-----
AAGTGGGCTATTTCTTTGCAAAAATTGTGCTCAATTTTCAATATGTGGCAATTCCACCAAGATCTTCTCGTTAGTTGGGGGAA
G---AATCCGCACGAATCGGATTTTTTTAGGAAA---
ATATCGAGAGAGAATTGGATTTGGTTAGACAATGTGTGGTGGTAAACAAGGATAGATTTTTTTAGC-----
-----
```

```
-----
AAGGTACGAAACGTATCGTCAAATATTCAATAT-----GATTCTACAAGATCT-----
AGTTTTCGTTCAAGTAACGGATTCTAGCCAATTGAACGGATCTTCT---GATCAATTCATAGATCCTTTTCGATTCC---
ATT-----
AGTAATGAGGATTCCGGAATATCACTATCACACATTGATCAATCAAAGAGAGATTCAACAATAAAAGAAAGATCGATTCT
T---TTGGATCCTTCC-----TTTATTCAAACGGAAGGAAGAGAGATAGAATCAGAC-----
CGATTCCCTAAATACCTTTTCTGGCTATTCCTCA-----ATGCCCCGG-----
CTATTCACGGAACGTGAGAAGCGAATGAATAATCATCTGCTTCCGGAAGAA-----AGCGAAGAATTTCTT-----
GGGAATCCTACAAGAGCCATTCTGT---TCTTTTTTCTCTGACAGATGGTCAGAACTTCAT---CTG---
GGTTGCAATCCTACTGAGAGGTCCTAGGGATCAGAAATTGTTGAAGAAA-----
-----GAACAAGATGTT---
```

```
TCTTTTGTCCCTTCCAGGCGATCGGAAAATAAAGAAATAGTTAATATATTCAAGATAATTACGTATTTA
Atropa
TTATCGAACCTATTCGGTTGTCTGTAAAAATAATGGACAATTTATTATGTATCAAACCATAGGTATTTTCATTGGTTTCAT
AAAAGTAAACACCAAATAATCAAAGATACCGAGACCAAAGATATGTTGATAAAAAGAATTTTGTGAATCCATTCTGCA
ACCTCAAACCTCAAAGAATAAATACAGACAAAAATCATTTTTGATTTACTTGTTTCCTGAAAATATTTTATGGTCTAGACGTC
GTAGAGAATTGAGAATTCGAAGTTTTTTAATTCTTTGAATTGGAATGGCGTCGATAGGAATTCAGTATTTTGAACGAA
ACCAATGTAAAAAACTGGAGTCAATTTTTGGATGAAAGGAAACCTCTTTATAAAGAGAAAAATGAATTAATTAATTGAA
GTTCTTTCTTTGGCCTAATTATCGATTAGAAGATTTAGCTTGATGAATCGTTATTGGTTTTGATAACAATAATGGTAGCC
GTTTCAGTATCTTAAGGATACATATGTATCCACGATTGAAAATTAATTGA-----
-----
```



-----CAACAAGATCTT---  
TCTTTTGTCCTTCCAGGCGATCGGAAAATAAAGAAATGGTTAATATATTCAAGATAATTACGTATTTA  
Buxus -----



TGGGTTCTCCCAATAACTAAA-----AAG---  
TGTATCATGCCTGAATCTAACTGGGGTTCGCGGTGGTGGAGGAACCGGATCGGAAAAAGAGGGATTCTAGTTGTAAGAT  
ATCTAATGAAACC-----  
GTAGCTGGAATTGAGATCTCATTCAAAGAGAAAGATATCAAATATCTGGAGTTTCTTTTTGTATCCTATACGGAT-----  
-  
GATCCGATCCGCAAGGACCATGATTGGGAATTCTTTGATCGTCTTTCTCCGAGGAAGAAGCGAAACATAATCAACTTGAA  
T-----  
TCGGGACAGCTATTTCGAAATCTTAGTGAAACACTTGATTTGTTATCTCATGTCTGCTTTTTCGTGAAAAAAGACCAATTGA  
A---GTGGAGGGTTTCTTCAAACAACAAGGA---  
GCTGAGGCAACTATTCAATCAAATGATATTGAGCATGTTCCCATCTCTTCTCGAGAAAC-----  
AAGCGGGGTATTTCTTTGCAAAATTTGTGCTCAATTTTCATATGTGGCAATTCGCCAAGATCTCTTCGTTAGTTGGGGGAA  
G---AATCGGCACGAATTGGATTTTTTGGAGAAC---  
GTATCGAGAGAGAATTTGATTTGGTTAGACAATGTGTGGTTGGTAAACAAGGATCGGTTTTTTAGC-----  
-----  
-----  
AAGGTACGGAATGTATCGTCAAATATTCAATAT-----GATTCCACAAGATCT-----  
ATTTTCGTTCAAGTAACGGATTCTAGCCAATTGAAAGGATCTTCT---GATCAATCCAGAGATCCTTTTCGATTCC---  
ATT-----AGTAATGAGGATTCGGAATATCAC-----  
ACATTGATCAATCAAACAGAGATTCAGCAACTAAAAGAAAGATCGATTCTT---TGGGGTCCTTCC-----  
TTTCTTCAAACGGAACGAACAGAGATAGAATCAGAT-----CGACTCTTCAAATGCCTTTCTGGATATTCCTCA-----  
-ATGTCCCGG-----CTATTCACGGAACGTGAGAAGCAGATGAATAATCATCTGCTTCCGGAAGAA-----  
ATCGAAGAATTTCTT-----GGGAATCCTACAAGATCAATTCGT---  
TCTTTTTTCTCTGATAGATGGTCAGAACTTCAT---CTG---  
GGTTCGAATCCTACTGAGAGGTCTACTAGAGATCATAAATTGTTGAAGAAA-----  
-----CAACAAGATGTT---  
TCTTTTGTCCCTTCCAGGCGATCGGAAAATCAAGAAATAGTTGATATATTCAAGATAATTACATATTTA  
Ceratophyllum --GACCGAGAGATTACA-----TATAATTACAAGACACAT-----  
AAATCCAAATCATTTTGTACACTCGGAGGTCTAACTATTAGTGAT-----TATCTAAAGGAAGAGTATCTTATTGAT--  
-----ACAGATAAAAATTCAGATAGAAAATATTTTGGTTGGGAATCATCTATTTTTCTCTTAGAAAAAATATC-----  
--  
GATATTAAGGCATGGATCGATAAAAAATATCGGGACCAACACCAACATTAATATTAATAAAAAAATAAAGACGGGAAATAC  
TTTTTATCAAATAAGTGATAAGAAAAATCTTTTTGACCTCACAATTTCTCAACAAAGAAACTCATCCAATCAA-----  
--AAAACAAAAAACAATAAATTTGGATTTTTG-----GATTGGATGGGAATGAATAAACAA-----  
ATGCTAGATCATTCCATATCGAACTTTGAACCTTCTTGGTTCTTACCAGAATTTTGTTTACTTTATGATGCATATAAGGT  
TAAACCATGGATCATGCCAACAAAATTACTTCTTTTGAATTTGGATACAAACGAAAATATTCGAAATCAAATGAAAACA  
TTAGAAAAAGTAACAAAATAAATGGAAATAAAAAACAGGATTTTCGTATATCA---  
TCTAATCCAAAAGATTATCTTGAA-----  
TTAGATAATGGGACTCCAAAAGAAAAAGAAAAACAGGGAAAAGTAAAAGGAAATCTTGGATCCAATCAAAAAACCCGAGA  
AAATCTT---GGATTAGATCTACGAAACCAACAAAAAATGTTGAA-----  
AACGATTACGTGGGT-----TCAGACATTAAAAAACGTCTGA---  
AAGAAAAACAATTCACAACAACAAGGAGACAGAACTCGATTGATCCTGACAAATTATTTGGTTTTTCAATTGCGATG  
GAACCCATTTTTAAAT-----  
AAAGGAATAATGAAGAACATCAAAGTGGATTGTCTCCTGCTTAGACTGATAAATCCAAAGGAAATTGCGATAGACTCTAT  
TCAAAGTGGAGAGATGCACTTGGATTTAATGTGATTCAA-----AGAGATCCATCTCTTACA-----  
AAATTGATAAAA-----  
GACGGGATATTTGTTATCGAACCACGTCGTCTGTCTATAAAAAGGGATGGACAATTCATTAAGTATCAAACATATAGGTAT  
TTCATTGGTTTCATAAGAGAAAAGTACCAAACTAATCGAGGATATCCAGAAAACAATATATTGATGAGAATGATTTCTATG  
GATCCATT-----TCACAACATGGAAAAATGTTTGTGAATGGAGACGAAAATCATTATGAT-----  
TTAATTGTT---CCCGAAAATATTCTATCTACTAGACGGCGTAGGGAGTTGAGAATTCGAAATTGTTTAAATTCT-----  
-GGTAATACTGAGAATAGAAATCCAGTATTTTTCGAT-----AGCACCACGTAAGGAAGTGTGGA---  
AAATTTTTAGATGAGGACAAGTATCTTGAT-----ACAGATATACAAAAGTTAATTAATTAATAA-----  
TTATTTCTTTGGCCCAATTTTCGATTGGAGGATTTAGCCTGTATAAATCGTTATTGGTTTTGATACCAATAATGGCAGTCG  
TTTCAGTATGTTAAGGATACATATGTATCCA---CGATTCATAGTTAGTTGA-----  
-----  
-----  
-----











GCCGCTGGAATTGAGATCTTATTCAAAGAGAAAGATCTCAAATATCTGGAGTTTCTTTTTGTATATTATATGGAT-----  
 -  
 GATCCGACCCGCAAGGACCGTGATTGGGAATTGTTTGATCGTCTTTCTCTGAGGAAGAGGCCGAAATACAATCAACTTGAA  
 T-----  
 TCGGGACCGCTATTCGAAATCTTAGTGAAACACTGGATTTCTTATCTCATGTCTGCTTTTTCGTGAAAAAATACCAATTGA  
 A---GCGGAGGGTTTCTTCAAACAACAAGG---  
 GCTGGGTCAACTATTCAATCAAATGATATTGAGCATGTTTCCCATCTCTTCTCGAGAAAC-----  
 AAGTGGGCTATTTCTTTGCAAAATTGTGCTCAATTTTCATATGTGGCAATCCGCCAAGATCTCTTCATTAGTTGGGGGAA  
 G-----GAATCGGATTTTTTGAGGAAC---  
 GTATCGAGAGAGAATTTGATTTGGTTAGACAATGTATGGTTGGTAAACAAGGATCGGTTTTTTTAGC-----

-----  
 AAGGTACGGAATGTATCGTCAAATATTCAATAT-----GATTCCACAAGATCT-----  
 AGTTTTCGTTCAAGTAACGGATTCTAGCCAAGTAAAGGATCTTCT---GATCAATCCAGAGATCATTGATTCC---  
 ATT-----AGTAATGAGGATTCGGAATATCAC-----  
 ACATTGATTAATCAAAGAGAGATTCAACAATAAAAGAAAGATCGATTCTT---TTGGATCCTTCC-----  
 TTTCTTCAAACGGAACGAACAGAGATAGAATCAGAC-----CGATTCCCGAAATGCCTTTCTGGCTATTCCTCA-----  
 -ATGTCCCGG-----CTATTCACGGAACGTGAGAAGCAGATGATTAATCATCTGCTTCCGGAAGAA-----  
 ATCGAAGAATTTCTT-----GGAATCCTACAAGATCCGTTTCGT---  
 TCTTTTTTCTCTGATAGATGGTCAGAACTTCAT---CTG---  
 GGTTTGAATCCTACTGAGAGGTTCCACTAGAGATCAAAAATTGTTGAAGAAA-----  
 -----CAACAAGATCTT---  
 TCTTTTGTCCTTCCAGGCGATCGGAAAATAAAGAAATGGTTAATATATTCAAGATAATTACGTATTTA

Cucumis

AACCCGTTTCGTCTGTCTCTAAAAAATGATGGAAAATTTATTATGTCTCAAACCATAGGTATTTTCATTAGTTTACAAGAAAT  
 AAGTACCAATTGAATCAAAGATATCAAGAAAAAGGCTATCCTTATAAGAGGAGTTTTGCTGAATCCATTGCAATACATCA  
 AAAAAGGACTGAAAAATAGAACCAGCAATCATTATGATTTGCTTGTTCGGAAAATATCTTATCCCCTAGAGGTCGGAGAG  
 AGTTTAGAATTCTAATTTGTTTCAATTCTGGGAATAAAAAATGATATCCATAGAAATACAGCATTGACGATGGAAATAAG  
 GTGAAAACAGATGATCAAGTTTTGGATAAAAAGAAGCAAACATCTTGATAGATATCAAAAATCAACTAAAAAATTTAAAGTT  
 ATTTCTTTGGCCCAATTATCGATTAGAAAATCTAGCTTGATGAATCGTTATTGGTTTGTATACCAATAATAGCAGTTCGTT  
 TTAGTATGCTAAGGATCCATATGTATCCACAATGAAAATTCGTTAA-----

-----GTGAAA-----  
-----GGGCAG-----CAATTC-----AAA-----TTATGGATTTTAGAATTC-----  
AGAGAGATCAAGAATTCTCATTATTTCTTA-----  
GATTCATGGACCCAATTCAATTCATTGGGATCTTTTCATTCACATTTTTTCCATCAAGAACGTTTTATAAACTCTTAGA  
CTCCCGAATTTGGAGTATCCTACTTTTCACGCAATTCA-----  
CAGGGTTCAACAAGCAATCGATATTTTCACGATC-----AAGGGTGTA---GTACTATTT---  
GTAGTAGCGGTCGTCCTTATATATCGTATTAACAATCGAAAG---  
ATGGTCGAAAGAAAAATCTCTATTTGACAGGGTTTCTTCTATACCTATG-----  
AATTTCAATTGGACCCAGAAATGATACATTGGAAGAATCTTTGGCTCTTCCAATATCAATAGGTTGATTGTTTTGCTCCT  
GTATCTTCCA-----  
---ACTAGTTTC-----  
GTTCAAGTA-----  
ACGGATTCTAGC-----

-----CAATTGAAAGGATCTTCT---GATCAATCCAGAGATCATTTCGATTCC---ATT-----  
-----AGTAATGAGGATTCGGAATATCAC-----ACATTGATCAATCAAAAAGAGATTCAACAA-----

-----CCGCTTCCGGAAGAA-----ATCGAAGAATTTCTC-----GGAATCCTACAAGATCCATTCGT---  
TCTTTTTTCTCTGACAGATGGTCAGAACTTCAT---ATG---  
GGTTCGAATCCTATTGAGAGGTCCACTAGAGATCAGAAATTGTTGAAGAAA-----  
-----GAACAAGATGTT---  
TCTTTTGTCCTTCCAGGCGATCGGAAAATAAAGAAATAGTTAATATATTCAAGATAATTACGTATTTA

Daucus

CAAGATATCAAATAATACTTCGAAAGCGAGACAAAAAACATTATGATTTTGTGCTTCCTGAAAATATTTTATCGTCTAGA  
CGTCGTAGAGAATTGAGAATTCTACTTTCTTTCAACTCAAAGAATCTAAATAGTGTGGATAAAAAATCCAGTATTTTGTAA  
CAAGAAGAACATAAAAAGAAGGAATCCTTTTTTTGGATCAAAAAAACATCTTGATAGAGATAAAAAACGAATTAATTAAT  
TAAAGTTATTTCTTTGGCCTAATTATCGATTAGAAGACTTAGCTTGTATGAATAGATATTGGTTTTAATACCAATAATGGA  
AGCCGTTTTAGTATATTAAGAATATATCCACAATTCAAAATAGGTTGA-----

-----ATGAAA-----  
-----GGACAT-----CAATTC-----AAA-----  
TTCTGGATTTTCGAATTAAGAGAGATATTGAGAGAGATCAAGAATTCCTACTATTTCTTA-----  
GATTCATGGACCCAATTCAATTCAGTGGGATCTTTTATTACATTTTTTTCCACCAAGAACATTTTATAAACTTTTTGA  
CCCCGAATTTGGAGTATCCTACTTTTCACGCAATTCG-----  
CAGGGTTCAACAAGCAATCGATATTTTCACGATC-----AAGGGTGTAGTAATACTCTTT---  
GTAGTAGCGGTC---CTTATATATCGTATTAACAGTCGAAAT---  
ATGGTCGAAAGAAAAATTTATATTTGATAGGACTTCTTCTATACCTATG-----  
AATTCCATTGGACCCAGAAATGATACATTGGAAGAATCCGTCGGGTCTTCCAATATCAATAGGTTGATTGTTTCCCTCT  
GTATCTTCCA-----  
AAAGGAAAAAAGATCTCTGAGAGTTGTTTCTGAATCCGAAAGAGAGTACT-----  
TGGGTTCTCCCAATAACTAAA-----AAG---  
TGTAGCATGCCTGAATCTAACTGGGGTTTCGCGGTGGTGGAGGAAGTGGATCGGAAAAAGAGGGATTCTAGC-----

-----ATT-----  
-----AGTAATGAGGATTCGGAATATCAC-----  
ACATTGATCAATCAAAGAAAGATTCAACAATAAAAGAAAGATCGATTCTT---TGGGATCCTTCC-----  
TTTCTTCAAACGGAACGAACAGAGATAGAATCAGAC-----CGATTCCCGAAAAGCCTTTCTGGATATTCCTCA-----  
-ATGTCCCGG-----CTATTCACGGAACGTGAGAAGCAGGTGATTAATCATCTGCTTCCGGAAGAA-----  
ATCGAAGAATTTCTT-----GGGAATCCTACAAGATCCGTTTCGT---  
TCTTTTTTCTCTGACAGATGGTCAGAACTTCAT---CTG---  
GGTTCGAATCCTACTGAGAGGTCCACTAGAGATCATAAATTGTTGAAGAAA-----  
-----CAACAAGATCTT---  
TCTTTTGTCCCTTCGAGGCGGTTCGGAAGAAAGAAATGGTTAATATATTCAAGATAATTACATATTTA  
Dioscorea











Glycine

TAAATCAAATAATATAAATAGTATGCATAGAAACACAATATTTTATAATCAAATAAAGTCAAATGGTTTTCCACTT  
TTGACTAAAAAAGAAAAATTTTTGAGAAAAGATAAAAAAACTAATGAATTTCAAATTTTTCTTTGGCCAAAATATCG  
ATTAGAAGATTTAGCTTGTATAAATCGATATTGGTTTAATACCCATAATGGAAGCCGTTTCAGTATAGTAAGGATACATA  
TGTATCCGCGAATGAAAATTCGTTAA

-----ATGAAA-----  
-----GGACAT-----CAATTC-----AAA-----  
TCCTGGATTTTCGAATTGAGAGAGATATTGAGAGAAAATCAAGAATTCGCTATTTCTTA-----  
GATTCATGGACCCAATTC AATTCAGCGGGATTTTTTCATTCATATTTTTTCCATCAAGAGAGTTTTATAAACTCTTGGA  
CTCCCGAATTTGGAGTATCCTACTTTTCACGCAATTC A-----  
CAGGGTTCAACAAGCAATCGATATTTTCACGATC-----AAGTATGTA---GTACTCTTT---  
GTAGTAGCGGTC---CTTATCTATCGTATTAACAATCGAAAA---  
ATGGTCGAAAGAAAAATCCCTATTTGACAAGGCTTCTTACTATACCTATG-----  
AATTCATTGGACCCA AAAATGATACATTGGAAGAATCATCTGAGTCTTCCAATATCAATAGGTTGATTGTTCCGCTCCT  
GTATCTTCCA-----  
AAAGGAAAAAAGATCTCTGAGAGCTATTTCTGGATCCGAAAGAGAGTACT-----  
CGGGTTCTCCCAATAACTAAA-----AAG---  
TATATCATGCCTGAATCTAACTGGGGTTCGCGGTGGTGGAGGAAGTGGATAGGAAAAAGAGCGATTCTAGTTGTAAGAT  
ATCTAATGAAACC-----  
ATTGCTGGAATTGAGATCTCATTCAAAGAGAAAGATATCAAATATCTGGAGTTCCTTTTTGTATATTATATGGAT-----  
-  
GATCCGATCCGTAAGGACCATGATTGGGAATTTTTTGTATCGTCTTTCTCCGAGAAAGAGGGCGAAACATAATCAACTTGAA  
T-----  
TCGGGACAGCTATTCGAAATCTTAGTGAAAGACTGGATTTATTATCTCATGTTTGCTTTTTCGTGAAAAAATACCAAAGGA  
A---GTGGAGGGTTTTTCAAACAACAAGG---  
ACTGGGTCAATTTCAATCAAATGATATTGAGCATGTTTCCCATCTCTTCTTGAGAAAC-----  
AAGCGGGCTATTTCTTTGCAAAATTTGTGCTCAATTTT CATATGTGGCAATTC CGTCAAGATCTCTTCGTTAGTTGGGGGAA  
G---  
AGTCCGCACGAATCGGATTTTTTGGAGAACACATGTGAGAGAGAATTGGATTTGGTTAGACAATGTGTGGTTGGTAA  
CAAGGATCGGTTTTTTAGC-----  
-----  
-----AAGGTACGGAATGTATCATCAAATATTCAATAT-----GATTCCACGAGATCT-----  
AGTTTTATTCAAGTAACGGGTTCTAGCCAATTGAAAGGATCTTCT---GATCAATCCAAGGATTATTTTCGATTCC---  
ATT-----AGGAATGAGGATTTCGAAATATCAC-----  
ACATTGATCAATCAAAGAGAGATTCAACAATAAAGAAAGATCGATTCTTTGTTGGGATCCTTCC-----  
TTTCTTCAAACGGAACGAACAGAGATAGAATCAGAG-----CGATTCCCTAAAATCCTTTCTGGATATTCCTCA-----  
-ATGTGCCGA-----CTATTCATGGAACGTGAGAAGCAGATGAATAATCATCTGCTTCCGCAAGAA-----  
ATCGAAGAATTTCTT-----GGGAATCCTGCAAGAGCTACTCGT---  
TCTTTTTTCTCTGACAGATGGTCAGA ACTTCAT---CTG---  
AGTTCGAATCCTACTGAGAGGTCTACTAGAGATCAGAAATTGTTGAAGAAA-----  
-----GAACAAAATGTT---  
TCTCTTGTCTTTCCAGGCGATCGGAAAATAAAGAAATAGTGAATTTATTCAAGATAATTATGTA TTA  
Gossypium --AGGGAAGAGAGTCT-----TATCATTACAACATGGAT-----  
AAACAAAATTTTTTGATACACTGAGGGATATCCCCATCCATAAT-----  
TATCTAGGAGAAGGCGATATCCTAGATGCT-----  
ATGGGGAATTTTTTCGCACAGAAAAGTTTTTAAATGGAGAATTTCTTGATTTTTGCTTTAGAAATAAGGTC-----  
GATATTGAGTCTGGGTGATAACAGT-----ACCAAGAGTAAGAAAAATATTAAGACTGTGGTTAAG-----  
-AATTATCAAATA-----ATTGATAAAATGGACCTTTTTTATTTT CACAATTTATCAAGATCAAGAA-----  
--AGCAACCCATCCAATAAAAAAGGAAGCCATTTT-----GATTGGATGGGACTGAATGAAGAA-----  
ATACTAAGTCATCCTATAACCGAATCTAGA ACTT---  
TGGTCTTCCCAGAATTTGTGCTGCTATATAATGCATATAAGGTTAAACCATGGATCATAACCAATAAAAATTACTTCTTTT  
CAATTTTAATGGAAAT---AGGAAC-----ATT-----AATCAAAATATTATTGAAAATAAAAAAAGG-----  
GACTCCCTTATAGCA-----CCAAACGAAAAACAAATTATTGGA-----  
TTAGAGAATCGAAATCAAGAAGAAAAAGAACCCATAGGTGAA-----  
GGGGGTCTTGATCAGATGCACAAAAACAAGGAAATTTT---AAATCCGTTCTCTCAAACCAAGAAAAAGATGTTGAA--  
-----GAAGATTATGAT-----AAATCAGACAAAAAAAACGTAGA---







Jasminum

GAGAATTGGCTTTTGAGATACTGGCGACTCGTCCGATTCAAAGTTGGAAAAAATTGCTGCTAAAGAGAAAGGAACTGGTT  
TTTTTCGAACCCATTTCGCCTGTTTGGAAAAACAACGGGCAGTTTATTATGTATCAAACCATCGGTATTTTCATTGGTTCA  
TAATAATAAGCACGAAATTCAGCCAAGATTCCGAAAAAAAAAAAAAAAAAGATATGGTTCTAAGACGAATTTTGATGAATCTA  
TTCCACCACATGAAAAGAATAACAAGAAATGATGAAAAGAAATACCAACAAATGATGAAGATGAAAAAAGGAACAAAAGACTA  
AGAATAAATTATGAAAGAAATGCAGACAAAAATCATTGGATTGGCTTGGTTCCGGAAAAATATTTTCTCATTTAGGCGTCG  
TAGAAAATTAAGAATTCTAACTGTTTGAATTCAAAGAATAGGAATGATGTAGATAGAAATCCTGTATTTTGCAACGAGA  
AGAATAGCAGCCAAGACCTTGATAGAGAGAAAAATCTATTAATGAAATTGAAGTTTTTTCTTTGGCCTAATTATCGATTG  
GAAGATTTAGCTTGTATGAATCGCTATTGGTTTTGATACCAATAATGGCAGTCGTTTCAGTATGTTAAGGATACGTTTGTA  
TCCACGATTGAAAATTCGTTGA









ACATTGATCAATCAAACAGAGATTTCAGCAACTAAAAGAAAGATCGATTCTT---TGGGATCCTTCC-----  
TTTCTTCAAACGGAACGAACAGAGATAGAATCAGAT-----CGATTCCCGAAATGCCTTTCTGGATATTCCTCA-----  
-ATGTCCCGG-----CTATTCACGGAACGTGAGAAGCAGATGAATAATCATCTGCTTCCGGAAGAA-----  
ATCGAAGAATTTCTT-----GGGAATCCTACAAGATCAATTCGT---  
TCTTTTTTCTCTGACAGATGGTCAGAACTTCAT---CTG---  
GGTTCGAATCCTACTGAGAGGTCCACTAGAGATCAGAAATTGTTGAAGAAA-----  
-----CAACAAGATGTT---  
TCTTTTGTCCCTTCCAGGCGATCGGAAAATAAAGAAATGGTTGATATATTCAAGATAATTACGTATTTA  
Lotus AAAAGCGAGCAATTTCT-----TATGATTACAACACGCAA-----  
AAAAAGGAATTCCTTTGATAGAATGGACGATATCTCTATCAAAAAAT-----TATATAGCAGAAGATGCTATTCGTTAT--  
-----ATCGAACAAAATCGGGATAGAAAAGTATTTT-----  
-----GATTGGGTGGTAATGGATGTAAAA-----  
ATACAAAATAATTCTATATCGAATCTTCAATTT---  
TCGTTTTTTTTTAAATTCCTGAGATTTTATGATGCATATAGGAATAAACCGTGGATCATACCAATCAAATTCCTTTTTTTT  
ACATTTTTCTGTAAAT---CAAAT-----TTAATAAAATTAACAAACATTATTGAAAAGAAAAGAAGAATA---  
GATATTTTTAAACCA-----TGGAAAAAGAAAAAATTCCTGAAGTCGAG-----  
TTAGAGACGCCAAATCGAGCAAAAAAGAATACACAAGTAGA-----GTAGATCTTAATAAACCATCT-----  
CTCTCAAACCAA-----GAAAAAGATATTGAA-----  
GAAGATTATGGAGAATCGGACAGTAAAAAAGGTGGTAAGGATAAA---  
AATAAAAAGAAATACAAGAATAAGATAGAGGCAGAAGTTAATTTATTACTAAGAAAGTATTTGAATTTTCATTTGAAC TG  
GAAGGGTTCCTTAAAT-----  
AAAAGAGTAATAAATAATGTCAAAGTATATTGTCTACTGATTGATTGAAAAATATAAAACAAATAGCTATATCCTCTAT  
TCAAAGGGGAGAATAAGTCTAGACATTATGATGATTCAAATGAGAAGGATTCCACTCTTACG-----  
GGATTTCAGAAAAAAAAA-----  
GAATTTATAGAAAAAGGAATTTTTATTATCGAACCCAGTCCGCCTGTCTAGAAAAACAATGAACAATTTTTTTATGTATGA  
AACC GCGCCTCCTATTAATTCATAAGAGTAAACGCCAAATTAATCAACGAAACCCAGAAAAAGTGATCTTGATAAGC  
AAATTTTTTATAAAAAACATTCCTCCCA-----  
AAAAGAGATCAAAGGATAACACAAAATAAAGAAAAAACAATTATGCT-----TTAGTTGTT---  
ATTGAAAATATTTTATCGGCTAGACGTCGTAGAGAATTGAGAATTCCTAATTTGTTTCAATCCTAGGAGTATAAATAGTAT  
GCCTAGAAAGACAATATTTGACAAT-----GAAAATAAAATAAATAATTGCTGT---  
CAAGTTTTTGCTAAAAATAAGATCTTGAT-----AAAGAAAAAATACTAATGAATTTAAAA-----  
TTAATCTTTGGCCGAATTATCGATTAGAAGATTTAGCTTGTATAAATCGCTATTGGTTTGATACTATAATGGAAGCCG  
TTTCAGTATAGTAAGGATACATATGTATCCA--CGGTTGAAAATGCGGTAA-----  
-----A-----  
-----ATGAAA-----GGACAT-----CAATTC-----AAA-----  
TCCTGGATTTTCGAATTGAGAGAGATATTGAAAGAGATCAAGAATTCGCTATTTCTTA-----  
TATTCATGGACCCAATTCAATTCAACGGGATCTTTTATTACATTTTTTTCCATCAAGAGAGTTTTATAAACTCTTGGA  
CTCACGAATTTGGAGTATCCTACTTTTCAGGCAATTCA-----  
CAGGGTTCAACAAGCAATCGATATTTTACGATC-----AAGGATGTA---GTACTTTTTT---  
GTAGTAGCGATC---CTTCTATATCGTATTAACAATCGAAAA---  
ATGGTCGAAAGAAAAATCTCTATTTGACGGGGCTTCTTCTATACCTATG-----  
AATTCCATTGGACCCAGAAATGATACACTGGAAGAATCTTTTGAGTCTTCCAATATCAATAGGTTGATTGTTCCGCTCCT  
GTATCTTCCA-----  
AAAGAAAAAAGATCTCTGAGAGCTCTTCTGGATCCGAAAGAGAGTACC-----



-----  
-----  
-----  
-----  
-----  
-----

-----ATGAAA-----  
-----GGACAT-----CAATTC-----AAA-----  
TCCTGGATTTTCGAATTGAGAGAGATATTGAGAGAGATCAAGAATTCTCACTATTTCTTA-----  
GATTCATGGACCCAATTGAATTCAGTGGTATCTTTTCATTACATTTTTTTCCATCAAGAACGTTTTATAAACTCTTGGA  
CTCCCGAATTTGGAGTATCCTACTTTTCACGCAATTCA-----  
CATTACAGGGTTCAACAAGCAATCGATATTTAACGATC-----AAGGGTGTA---GTACTATTT--  
-GTAGTATCGGTC---CTTATATATCGTATTAACAATCGAAAG---  
ATGGTCGAAAGAAAAATCTCTATTTGACAGGGCTTCTTCTATACCTATG-----  
AATTTTCATTGGACCCAGAAATGATACATTGGAAGAATCTTTGGGTCTTCCAATATCAATAGGTTGATTGTTTTCGCTCCT  
GTATCTTCCA-----  
AAAGGAAAAAGATCTCTGAGAGCTGTTTCTGGATCCAAAAGAGAGTACT-----  
TGGGTTCTCCCAATAACTAAA-----AAG---  
TGTATCATGCCTGAATCTAACTGGGGCTCGCGATGGTGGAGGAAGTGGCTCGGAAAAAGAGGGATTCTAGTTGTAAGAT  
ATCTAACGAAACC-----  
GTCACTGGAATTGAGATCTCATTCAAAGAGAAAGATATCAAATATCTGGAGTTTCTTTTTGTATATTATATGGAT-----  
-  
GATCCGATCCGCAAGGACCATGATTGGGAATTGTTTGATCGTCTTTCTCCGAGGAAGAGGCGAAACATAATCAACTTGAA  
T-----  
TCGGGACAGCTATTCGAAATCTTAGTGAAAGACTGGATTTGTTATCTCATGTTTGCTTTTTCGTGAAAAAATACCAATTGA  
A---GCGGAGGGTTTCTTCAAACAACAAGGA---  
GCTGGGTCAACTATTCAATCAAATGATATTGAGCATGTTCCCATCTCTTCTCGAGAAAC-----  
AAGTGGGCTATTTCTTTGCAAAATGTGCTCAATTTTCATATGTGGCAATTCCGCCAAGATCTCTTCTTTAGTTGGGGGAA  
G---AATCCGCACGAATCGGATTTTTTGAGGAAC---  
ATATCGAGAGAGAATTGGATTTGGTTAGACAATGTGTGGTTGGAAAAACAAGGATCGGTTTTTTTAGC-----  
-----

-----  
AAGGTACGGAATGTATCGTCAAATATTCAATAT-----GATTCCACAAGATCT-----  
AGTTTTCGTTCAAGTAACGGATTTTAGCCAATTGAAAGGATCTTCT---GATCGATCCAGAGATCATTTTGATTCC---  
ATT-----AGGAATGAGGATTCAGAATATCAC-----  
ACATTGATCAATCAAAGAGAGATTCAACAATAAAAGAAAGATCGATTCTT---TGGGATCCTTCC-----  
TTTCTTCAAATGGAACGAACAGAGATAGAATCAGAC-----CGATCCCCTAAATGTCTTTCTGGATATTCTCTCA-----  
-ATGTCCCGG-----CTATTCACGGAACGTGAGAAGCAGATGAATAATCATCTGCTTCCGGAAGAA-----  
ATCGAAGAATTTCTTGTTCTTGGGAATCGTACAAGATCCATTCTG---  
TCTTTTTTCTCTGACAGATGGTCAGAACTTCAT---CTG---  
GGTTCGAATCCTACTGAGAGGTCCACTAGAGATCATAAATTGTTGAAGAAA-----  
-----GAACAAGATGTT---  
TCTTTTGTCCTTCCAGGCGATCGGAAAAATAAGGAAATAGTTAATATATTCAAGATAATTACGTATTTA

Nandina

AGACTAATCAAAGATACCAAGAAAAAGAAATGTTGATAAGAATGGTCTTGAGAAATCCATTGCACGGCATGAAAAATTG  
GTTGGGAATAGAGATAAAAAATCCTTTGCTTGTTCTTGAAAATATTTTATCTTCTCAACGTCGTAGAGAATTGAGAATTG  
AATTTGTTTTAAATTCGGGGAATGTGAATGTTGTGGATAGAAATCCAGTATTTTGCAATGGTAACAATGCAAGTAACCTGTG  
ATCAATTTTTGAACGAAGAGAGACATCTTGATATAGATACAAATAAATTTTTGAAGTTCAAATTATTGCTTTGGCCCAAT  
TATCGATTAGAAGATTTAGCTTGTATAAATCGCTATTGGTTTGATACCAATAATGGCAGTCGTTTCAGTATGTCAAGGAT  
ACGTATGTATCCACAATTGAGAATTAGTTGA-----  
-----  
-----  
-----  
-----  
-----









CCCCAAACTTGGAGTGTCTGCTTTTACGTGATTCA-----  
CAGGGTTCAACAAGCAATCGATATTTTACGATC-----AAAGGTGTA---GTACTGCTT---  
GTAGTAGCGGTC---CTTATATATCGTATTAACAATCGAAAT---  
ATGGTCGAAAGAAAAATCTCTATTTGATGGGGCTTCTTCTATACCTATG-----  
AATTCCATTGGACCCAGAAATGATACATTGGAAGAATCTTTTTGGTCTCCCAATATCAATAGGTTGATTGTTTTCGCTCCT  
GTATCTTCCA-----  
AAAGGGAAAAAGATCTCTGAGAGTTGTTTCATGGATCCGAAAGAGAGTACT-----  
TGGTCTCTCCAATAACTAAA-----AAG---  
TGTATCATGCCTGAATCTAACTGGGGTTCGCGGTGGTGGAGGAACTGGATCGGAAAAAGAGGGATTCTAGTTGTAAGAT  
ATCTAATGAAACA-----  
GTAGCTGGAATTGAGATCTCATTCAAAGAGAAAGATATCAAATATCTGGAGTTTCTTTTTGTATCCTATATGGAT-----  
-  
GATCCGATCCGCAAGGACCATGGTTGGGAATTGTTTGATCGTGTTTCTCCGAGGAAGAAGCGAAACATAATCAATTTGAA  
T-----  
TCGGGACAGCTATTTCGAAATCTTAGCGAAACACTTGATTTGTTATCTCATGTCTGCTTTTTCGTGAAAAAGACCAATTGA  
A---GTGGAGGGTTTCTCAAACAACAAGGA---  
GCTGAGGCAACTATTCAATCAAATGATATTGAGCATGTTTCCCATCTCTTCTCGAGAAAC-----  
AAGTGGGATATTTCTTTGCAAAATTGTGCTCAATTTTATGTGTGGCAATTCACCAAGATCTCTTCGTTAGTTGGGGGAA  
G---AATCATCACGAATCGGATTTTTTGGAGAAC---  
GTATCGAGAGAGAATTTGATTTGGTTAGACAATATGTGGTTGGTAAACAAGGATCGGTTTTTTAGC-----  
-----  
-----  
AAGGTACGGAATGTATCGTCAAATATTCAATAT-----GATTCCACAAGATCT-----  
ATTTTCGTTCAAGTAACGGATTCTAGCCAATTGAAAGGATCTTCT---GATCAATCCAGAGAGAATTTTCGATTCC---  
ATT-----AGTAATGAGGATTCGGAATATCAC-----  
ACATTGATCAATCAAACAGAGATTTCAGCAACTAAAAGAAAGATTGATTCTT---TGGGATCCTTCC-----  
TCTCTTCAAACGGAACGAACAGAGATAGAATCAGAT-----CGATTCCCGAAATACCCTTCTGGATATTCCTCA-----  
-ATGTCCCGG-----CTATTCACGGAACGTGAAAAGCAGATGAATAATCATCTGTTTCCGGAAAAA-----  
ATCGAAGAATTTCTT-----GGGAATCCTACAAGATCAATTCGT---  
TCTTTTTTCTCCGACAGATGGTTCAGAATTCAT---CTG---  
GTTTCGAATGCTACTGAGAGGTTTCGCTAGAGATCATAAATTGTTGAAGAAA-----  
-----  
CAACAAGATGTTTTTTCTTTTGTCCCTTCCAGGCGATCGGAAAAGAAAGAAATGGTTGATATATTCAAGATAATTACGTA  
TTTA  
Nymphaea --CACGGAGAGATT-----TCTAATTACAATACACAT-----  
AAATACAAATCGTTTTTAT-----GCTATAACCATAAATGAT-----AGCCTAGAAGATAAATATACAATTGAT--  
-----AGGGATCAAATCTAGATAGAAAATATTTTGAATTGAGAATCACCAATTTTGACCCTAGAAACAATATT----  
--GAAACTAGGACTAGTACGGATATCGGA-----ACTTTCATTAATAAAAAAAGAAAAGAACTACTAAGACT-----  
---GGGACCAAT-----AAGAAAGATATTCTTTCTTTTATATCAGAATTCATCAAGAA-----  
-----ATCCAAACAAAGCAAAAAGAGTTCTTTTTT-----GATTGGATGGGAATGAATGAACAA-----  
ATGTTAGATCGTACTATATCGAATCTGCGCCCT---  
TGGTCTTACCAGAATTTGTGCGGCTTTACGATCGATATACGACTAATCCGTGGATCATACCAATAAATTTGATTCTATT  
TGATTTTCATGGAAAT---AAAACAAGCGATCTTTATATAGATCCAAAGGTGGAATCTAATCAAAAAGAAAGA---  
TTTCATCCAAAACCAAAGTAGAATCTAATCAAAAGGGATATCTTGAA-----  
TTAGAGAATCGGAACCGGGACGAGAAAGAACGACAGCACCAA-----GGAAATCTTATATCTGATATA-----  
AGAAACAAA-----AAAAAGATGTTGGA-----  
GCAAATTTCTGCAGGT-----TCAGATATTAAGAAACGCAGA---  
AAGAAAAAGAAATTCAGAGCAAGAAGGAAGCGGAACTAGACTTATTTTTGAAAAATATTTTATTTTCAACTCCGATG  
GGATGATCCTTTCAAT-----  
AAAGGAATGAACAATAATATCAAGGTATATTGTCTACTGCTTAGACTTATGAATCCGAATGAAATTGCTATATCCTCTAT  
TCAAAGTGGAGAAATGGGTCTAGATGTAATGCTGATTAAT-----AGGGGTTTCTCTTCCA-----  
GAATTGATAAAA-----  
AAGGGAATATTTCTTATTGAACCGGTTTCGTTTGTCTATCAAACGGGATGGAATTTTCGATTATGTATCAAACCATAGCTAT  
TTCATTGACCATAAGATTTCAGCACCAAATAATCAAGGATACCAGTTAAAAAATATATTGATAAGAATTACTTTAATG  
GCTCGATT-----GCACGACACGGAGGAGTGCCTGTGAATGGGACAATAATAATTATGAT-----  
TTGCTTGTT---  
CCTGAACATATTTTATCTCCTAGCCATCGTAGAGAATTGAGAATTCCTAAGCCGTTTCAATTACCGAAATAGGAACCTTGT





Oryza

Panax

AAAATCCAAGAAATATTACTGTATCGTCTATTCAAACAGAGAAATAAGTCTGGATATAATGCTGATTCCGGAAGAGCTTA  
ACTGTTAGAGAGTTGATGAAAAGGGGGTATTGATTATCGAACCCATTTCGTCTGTCTGTAAAAAAGGATGGACAATTTAT  
TATGTATCAAACCATAGGTATTTTATTAATTCATAAGAGTAAGTACCAAATAATCAAAGATACCGAGAACAAGATATA  
TTGATAAGAAGAAGTTTGTGAATCCACCCCAAGATATCAAAGAAGAACTGGAAATAGAGACAAAAACCATTATGATTTT  
CTTGTTCCCTGAAAAGATTTTATCGTCTAGACGTCGTAGAGAATTGAGAATTTTAATTCATTTCAATTCAAGGAGTAGAAA  
AGGTGTGGATAGCAATCCAGTATTTTGCAACAAGAAGAACATAAAAAAGCAGGAGTCCTTTTTTGGATGAAAGTAAACGTT  
TTGATAGAGATAAAAAACGAATTAATTAATTAAGTTCTTTCTTGGGCCTAATTATCGATTAGAAGACTTGGCTTGTATA  
AATCGGTATTGGTTTGTATACCAATAATGGAAGCAATTTTCAGTATGTTAAGGATATATCCACAATTAATAATCCGTTGA--

ATGAAA

GGACAT CAATTC AAA

TCCTGGATTTTCGAATTGAGAGAGATATTGAGAGAGATCAAGAATTCTCACTATTTCTTA-----  
GATTCACGGACCCAATTCAATTCAGTGGGATCTTTTCAGTCACATTTTTTCCACCAAGAAGCCTTTTATAAACTTTTTGA  
CCCCCGAATTTGGAGTATCCTACTTTTCACGCAATTC-----  
CAGGGTTCAACAAGCAATCGATATTTTCACGATC-----AAGGGTGTA---ATACTCTTT---  
GTAGTAGCGGTC---CTTATATATCGTATTAACAGTCGAAAT---  
ATGGTCGAAAGAAAAATCTCTATTTGATAGGGCTTCTTCTATACCTATG-----  
AATTCATTGGACCCAGAAATGATACATTGGAAGAATCCGTTGGGTCTTCCAATATCAATAGGTTGATTGTTTCGCTCCT  
GTATCTTCCA-----  
AAAGGAAAAAGATCTCTGAGAGTTGTTTCTGAATCCGAAAGAGAGTACT-----  
TGGGTTCTCCAATAACTAAA-----AAG---

TGTAGCATGCCTGAATCTAACTGGGGTTCGCGGTGGTGGAGGAACTGGATCGGAAAAAAGAGGGATTCTAGC-----

-----  
-----  
-----  
-----  
-----  
-----  
-----

CAATTGAAAGGATCTTCT--GATCAATCCAGAGATCCTTTAGATTCC--ATT-----

-----AGTAATGAGGATTTCGGAATATCAC-----

ACATTGATCAATCAAAGAGAGATTCAACAACATAAAAGAAAGATCGATTCTT---TGGGATCCTTCC-----

TTTCTTCAAACGGAACGAAACAGAGATAGAATCAGAC-----CGATTCCCGAAATGCCTTTCTGTATATTCTCA-----

-ATGTCCCGG-----CTATTCACGGAACGTGAGAAGCAGATGATTAATCATCTGCTTCCGGAAGAA-----

ATCGAAGAATTTCTT-----GGGAATCCTACAAGATCCGTTCTG---

TCTTTTTTCTCTGACAGATGGTCAGAACTTCAT---CTG---

GGTTCGAATCCTACTGAGAGGTCCACTAGAGATCAGAAATTGTTGAAGAAA-----

-----CAACAAGATCTT---

TCTTTTGTCCCTTCGAGGCGATCGGAAAAGAAAGAAATGTTAATATATTCAAGATAATTACGTATTTA

Pelargonium

TAGTAAGTAATAACCAGACCGCAATTTACATCTTTACAACATACACAAAAGAAAGCCTTGTGAATATGCTTACAAGTAAT

TATAAGCATTTCGCGCATTCCAAGGAAAAGCATCCTTTGTTGGATATGCATATGGACGTTAATAGGACGGCGCTGCGTAG

GCGGATGAATTATAATCAGATACTCTTTCATGTTGAAGATAAGAAAAAGGATCTAAGGTGGTGGATAAGGTGCGTATTG

ATTCTTGGGTAACCTGGCCAGAATAGGGTGCTCCCGGCGGGTCTGTTAACCAGAGACCGCGTCCGGTTCCAGAGGGCGCA

ATGGTCTTCCCTAGAAAGCGTACTGAAACAACTAAGAGAGCGGAGACGACCTTACCCCGAAAGCCTAGATGAATCGTTCCAG

ACCTGAATGGCTGAAGTGGCCGCTGGAGCACCTCATCGGGTACATCCATAAAAATTTGTGATATGCACCTATACTTTTTCT

CTGTTTATGCCTTGTATTGGCCTGAGTTTTATGATAGGCATAGGCTAGCCAAGCTTGGCTGTGTTTTTCGGTATGAAAAG

TGTTATGATAAAAAGGCGTACCCCGATTTGGAAAAAACAAAAAGCATGGCTAAACGAAAAAAGACCTGGCTGCTAGAAA

AAAAAAATGTCGGGGAAGGCCAATCGATAAAGATTGCTCAACGAGAGTTTGACCTGAGTTTTGATACTAGAACCAGGAAG

AATTTGAAAAATCGAAAAAAAACCTTTTTTGATTGGATGGGATTAATAATGAAAACGAACCTAGAAGAATAATGGAA

CGCAATAATGATGAAAAGAAAAGTTCTTTCCTAGAATCTAGTTTTTTTTCTTCCCGAATTTATCCAACCTTTACAATTT

ACTTAATCTTTATGCGAAAGCGGAGTGGACCACGCCGATTCACTTTTTTGCAAAATGGAAAGATACGTTTCGCGCTCCT

CTTACGCGGATTTAAAGGTTGAGTTTGACTCCTTCAACTGGTACATGTACGACAAAAAGGAATGGCCGGCGAAAGGAAGA

CCACTTTGGGACTCGAACAGGGCCCGACGTGCTGCTGACATCGCAGGGCATTATTGAACCTAGGGAGAAAAGACCCTAG

GAAGGAAACGACTTTGGACATTATGATAGATCCTACTGAGAGAGAAAGGGCTTATGCTGAGACGATATCCGAAATGAAGG

CCGAAGAACAAAAGAAAATAGACGAAGAATACGAAGAAAAAAGGAAAAAAGAAAAAAGAACAAGAAGAACAAGGAAAG

GCCTTTGACGAAACAAGCTACAGAAAAAACCAAAAAAAGATTTGCTCGGGTGAGTACATTGAAACCGATAAAGTATTC

AAGGTTCCGAAAGACGGCGCTGAAGGATCTAAAAAAGTCAAAATTTCCGGTATCAAGTGCATATAGCCTACGTTATT

TGATCGCCGACTTCTTACTAATGTTACACGTACAAGCCAAGTCAACGATAAAGCAACTAACCCGAAGCTCCTTCTTGT

TTCATTAAGATCTTATAGAAATGAGTCAGTTTGAATAATGGGAACTACTCAAAATCAACTTCCAACCTTTGGAAGATAT

CCTAAACATGGGGTATCTCGTTCTGAACCCCATTCGTACCTTTAAAGATTGAGGTGGGAGCACGTTACGTATCAAAATCC

TAGCCATTTCCCTGCTTCCATAAGAATCAATTCAAAAATTTGGCCTACTCCTCCGGTCCGGACAATAAAAGAGACCCTTGT

CTGGAGATAGGTGTGAACAAAGTGAAGCAAACATACATATAAGGTCCGCAAGGGGCGCAAGGTAGTAGAATCGTTGAGCGT

GCGAAGACTGAGAGTTAAGAGGTGGTGGGACTGCGTGTGCTTATGGGAAATTTGGGTGCTTAGGTCTTTCTGGACCA

AATTTGGTTCGATATTTAGTTTCAACCTTTCCAAATCCCATTGAAAGCCAAAGCACGTGGAAAGAAAAAGCAGTCTCCTTGG

TCTTATGAGAGAGTCTTTGGTCTATTCCACTGGAACCCGAAAGTACATCCAAAGAAAAAGAGAAAGCGGACTCCTTGGT

TTATGAGAGAGTCTTTGGTCAATTCACGACAGACCAGATGAGGTTCTTTTATAAGATAGGTGTTTGCGGCAAGTTCAAGC

GCGAATGCACAGCTATCCTTCTAAGCCTTATAAAGTACCTAAGCGTGCCAACGACAGAATCAAAAAGCTTATTCTTTTG

GACGAGGGAGTGCCAGATACGCTTGTGCAAAAAGGGTCTGCTTGTTCCTGAAAATCTTTTATCCCCAGACGCCGACGACA

ATTGAGAATTGTAATGAACTCAATAAAAAAAGAAAAAAGAGAAAAAGAAATCCCTCAACATAAATTAACCCCTACAACA

AACTTCTTAAAGAAACTGGGCGTATGGATTTGAACCTACTATTGAGAGAACTAGACGAACGAGAAAAGAGACAACGAGAG

GAACGACTAAATCTAGTTCAAAAGAAAGAAAAGAGAACAAGAAGAACTACGCAAGAAAGAAAGAAAGCAAGAATTA

TAGAATCAAAAAGAAACTAATGAGATTAAGGTTTTTTCTTTGGCCGAAATATCGACTCGAAGACTTAGCTTGTATGAATC

GCTATTGGTTTTGATACTACTAATGGCAGCCGTTTCAGTATGTTAAGGATCCGAGTATATCCACGATTGAAAACCCGTTAA

-----ATGGAT-----

-----GAACAA-----GAATTC-----  
AAATTATTTCTTAAATTCTTTATTCTCGAATTAAGGGATCCTTCGAGAGATCAAGAATTCTCACCAGTTATTA-----

GATTCCTGGACCAAATTGAATTCATTGGGCACCTTTGATTCAAATTTTTTCAACCCAGAACGTGCTTTTCAATTATTGGA  
CCCACGGGTTTGGAAAGATCCTACTTTTCACGCAACTCA-----  
CGGGGTTGGAGAAAGACTCGACATTTTCACGATC-----GGGCGTGTA---CTACTATTT---  
GTAGTAGTAGTC---CTTATGTATAGGATGAGCCGTCGGAAT---  
ATGGTCGAAAACAAAAAGAGCTATTTGACAGGGGTTCTTCTATAACCCCTG-----  
AATCCCATTGGACACAGAAATGATACATTGGAAGAATCTATTGGGTTTTCCAATATCAATAGGTTGATTCTTCCGCTCCT  
CTATCTTCCA-----  
AAAGGAAAAAAGATCCCTGAGAGCTCTTCTGGATCCGAATGAGAGTACT-----  
TGGGCTCTCCAATCACTAAA-----AAG---  
TCGATCATGCCGAATCTAGATGGGTTTCGCGGTGGTGGTGTAGCTGGGTGGGAAAAAGGAGGGATTCTAGTTGTAAAAG  
AGCTCATAAAACC-----GTGGCTGGGATTGAGATCTCATTCAAAGAGAAAAAGAGCAAATATCTGGAGTTTCTG-----

GAGGATTCAGAATATCCC-----ACATTGATCAATCAAAGAGAGATTCAACAAATAAAAGAAGAATCGATTCTT---  
TGGCATCCTTCTCCTTCTTG-----GAACGAACAGAG-----

--GAAGAA-----ATCAAAGAATTTCTT-----GGGAATTCTACAAGATCCCTTCGT---  
TCTTTTTTCTCTGACAGATGGTCAGAACTTTAT---CTG---  
AGTTCGAATCCTACTGAGAGGTTCACTAGAGATCAGAAATTGTTGAAG-----CAAGACCTT---

TCTTTGTACCCTACCGGCGATCGGAAAATCAAGAAATAGTGAATCTATTCAAGATCATTACGTATTTA

Phalaenopsis

AAGGGGGTTTGA AAAATCCATTGCACAACACAGCAACCTATTTTTGAGTGGAGACAAAAATCATTATGATTTACTTGTT  
CCTGAAAATATTCTATCCCCAGACGTCGTAGAGAATTTCGAATTCGAATTTGTTTAAATTTCCCGGAATTTTCATGTAA  
TGAAAATAAAATAAGAACTGTGGACAATTTTTGAATGAGAACAAACATATTAATACAGATAGAAAAAATTTTATTAATT  
TCAAATGTTTCTTTGGCCTAATTATAGATTAGAAGATTTAGCTTGTATGAATCGCTATTGGTTTGTATGCAATAACAGC  
AGTCGTTTCAGTATGTCAAGAATACATATGTATTAA-----

-----  
-----  
-----  
-----  
-----  
-----  
-----  
-----  
-----  
-----  
-----  
-----  
-----ATGAAA-----  
-----CGACAT-----CAATTC-----AAA-----  
TCCTGGATATTTCGAATTGAGAGAGATATTGAGAGAGATCAAGAATTCTCACTATTTCTTA-----  
GATTCCTGGATCAAATTCGATTTCAGTGGGATCTTTCACTCACATTTTTTCCACCAAGAACGTTTTATGAACTCTTTGA  
CCCCGAATTTGGAGTATCCTACTTTACGTGATTCA-----  
CAGGGTGCAACAAGCAATCGATATTTACGATC-----AAAGGTTTA---GTACTGCTT---  
GTAGTAGTGGTC---CTTCTATCTCGTATTAACAATCGAAAG---  
ATGGTCGAAAGAAAAATCTCTATTTGATGGGGCTTCTTCTTACCTATG-----  
AATTCCATTGGACCCAGAAAGGAGACATTGGAAGAATCTTTTTGGTCTTCCAATAGAAATAGGTTGATTGTTTCGCTCCT  
GTATCTTCCA-----  
AAAGGGAAAAAGATTTCTGAGAGTTGTTTCATGGATCCGCAAGAGAGTACT-----  
TGGGTTATCCCAATAAAGAAA-----AAG---  
CGTATCATGCCTGAATCTAACCAGGGGTTTCGCGGTGGTGGAGGAACCGGATCGGAAAAAGAGGGATTCTAGTTGTCAGAT  
ATCTAATGAAACC-----  
ATAGCTGGAATTGAGATCTCATTCAAAGAGAAAGATAGCAAATATTTGGAGTTTCTTTTTTATCCTATACGGAT-----  
-  
GATCCGATCCGCAAGGACCATGATTGGGAATTGTTTATCGTCTTTCTCCGAGGAAGAAACGAAACATAATCAACTTGAA  
T-----  
TCGGGACAGCTATTTCGAAATCTTAGGGAAAGACTTGATTGTTATCTCATGTCTGCTTTTCGTGAAAAAGACCAATTCA  
G---GGGGAGAGTTTCTTCAAACAACAAGGA---  
GCTGGGGCAACTATGCAATCCAATGATATTGAGCATGTTTCTCATCTTCTTCGAGAAAC-----  
AAGTGGGGTCTTTCTTTGCAAAATTTGCTCAATTTTCAATATGTGGCAATTCCGCCAAGATCTTTCGTTAGTTGGGGAA  
G---AATCAGCACGAATCGGATTTTTTGAGGAAC---  
GTCTCGAGAGAGAATTGGATTTGGTTAGACAATGTGTGGTTGGTAAACAAGGATCGGTTTTTTTAGC-----  
-----  
-----  
AAGGTACGGAATGTATTGTCAAATATTCAATAT-----GATTCCACAAGATCT-----  
ATTTTCGTTCAAGTAACGGATTCTAGCCAATGGAAAGGATCTTCTTCTGATCAATCCAGAGATCATTTCGATTCC---  
GTT-----AGAAATGAGAATTCAGAATATCAC-----  
ACATTGATCGATCAAACAGAGATTCAGCAACTAAAAGAGAGATCGATTCTT---TGGGATCCTTCC-----  
TTTCTTCAAACGGAACGAACAGAGATAGAATCAGAT-----CGATTCCCGAAATGCCTTTTTGGATCTTCCCTCC-----  
-ATGTCCTGG-----CTATTCACAGAACCTGAGAAGCGGATGAATAATCATCTGCTTCCGGAAGAA-----  
ATCGAAGAATTTCTT-----GGAAATCCTACAAGATCAATTCGT---  
TCTTTTTTCTCTGACAGATGGTCAGAATTCAT---CTG---  
GGTTCGAATCCTACTGAGAGGTCCACTAGAGATCATAAATTGTTGAAGAAA-----  
-----AAACAAGATGTT---  
TCTTTTGTCCCTTCCAGGCGAGCGGAAAAGAAAGAAATGGTTGATATATTCAAGATAATTACGTATTTA  
Pinus  
TACAAAATGATGAAGAACTCATGGGAAGAGACCAACATCTTAGCGTAGATACAACACAAATAAATTAACGTTTTCTTTGG  
CCTAGTTATCGATTAGAGGATATTATTTGCATGAATAGATATTGGTTCAATACAAATGATGGGAGTCGATCCGCGATGTT  
GAGAATACGTATGTATCCCCTAAGTCAATTGA-----  
-----  
-----  
-----  
-----







CTCGAGAAAG-----  
AAGTGGGGTATTTTTTTGCAAAATTGTGCTCAATTTTCATATGTGGCAATTCTACCAAGATCTCTTCGTTAGTTGGGGAAA  
G---AATCAGCACGAGTCGGATTTTTTTGAGGAAC---  
GTATCAAGAGATAATTGGATTTGGTTAGACAATGTGTGGTTGGTAAACAAGGATCGGTTTTTTTAGC-----

-----  
-----  
AAGGTACTCAATGTATCGTCAAATATTCAATAT-----GATTCCACAAGATCT-----  
ATTTTCGTTCAAGTAACGGATTCTAGCCAATTGAAAGGATCTTCT---GATCAATCCGGAGATCATTTCGATTCC---  
ATT-----AGGAATGAGAATTCGGAATATCAC-----  
ACATTGATCAATCAAACAGAGATTTCAGCAACTAAAAGAAAGATCGATTCTT---TGGGATCCTTCC-----  
TTTCTTCAAACGGAACGAACAGAGATAGAATCAGAT-----CGATTCGAAATGCCTTTCTGGATATTCCTCA-----  
-ATATCCCGG-----CTATTCACGGAACGTGAGAAGCAGATGAATAATCATCTGCTTCCGGAAGAA-----  
ATCGAAGAATTTCTT-----GGAATCCTACAAGATCAATTCGT---  
TCTTTTTTCTCTGACAGATGGTCAGAACTTCGT---CTG---  
GGCTCGAATCCTACTGAGAGGTCCACTAGAGATCAGAAATTGTTGAAGAAA-----  
-----CAACAAGATGTT---

TCTTTTGTCCCTTCCAGGCGATCGGAAAATAAAGAAATGGTTGCTATATTCAAGATAATTACGTATTTA

Platanus

AAATGAGTCTGGGTATAATGCTGATTAAGAGGGATCTAACTTTTACAGAATTGATAAAAAGGGGGATATTTATTATCGAA  
CCAGTTTCGTCTGTCTATAAAATGGGATGGACAATTTATTATGTATCAAACCATAGGTATTTTCATTGGTCCATAAAAAGTAA  
GCACCAAATAATCAAAGATACCGAGAAAAAAGATGTATTGATAAAAATCATTTTGAAGGATTCATTGCAAGACATGAAA  
ATATGCTTGGGAATGGAGACGAAAATCATTATGATTTGCTTGTTCCTGAAAATATTTTCATCGCCTAGACGTCGTAGAGAG  
TTGAGAATTCTAACTTGTTTCCATTTTTTTGAATGGGAATGTTCTAGATAGAAAATCCGGTATTTTGAATGGGAACAACGT  
AAAGAACTGCGGTCAATTTTTTTGAATGAGGACAAACATCTTGATAGAGATACAAATAAATTAATTAACATGAAATTAAGT  
TCTTTCTTTGGCCCAATTATCGATTAGAAGATTTAGCTTGTATGAATCGCTATTGGTTTTGATACCAATAATGGCAGTCGT  
TTCAGCATGTCAAGGATACATATGTATCCACGATTGAAAATAAGTTGA-----

-----ATGAAA-----  
-----CGACAT-----CAATTC-----AAA-----  
TCCTGGATCTTCGAATTGAGAGAGATATTGAGAGAGATCAAGAATTCCTCACTATTTCTTA-----  
GATTCATGGACGAAATTTGATTCAGTGGGATCTTTCACTCACATTTTTTTCCACCAAGAGCGTTTTATAAACTCTTTGA  
CCCCCGAATTTGGAGTATCCTACTTTCACGCGATTCA-----









GTCGCTGGAATTGAGATCTCATTCAAAGAGAAAGATATCCAATATCTGGAGTTTCCCTTTGTATATTATATGGAC-----  
-GATCCGATCCGCAAGGACCATGATTGGGAATTGTTTGATTGTCTTTCT-----

-----CTTTTTTTGAGGAAC-----

GTATCGAGAGAGAATTGGATTTGGCTAGACAATGTGCGGTTGGTAAATAAGGATCGGTTTTTTTAGC-----

-----  
AAGGTACGGAATGTATCGTCAAATATTCAATAT-----GATTCACAAGATCT-----  
AGTTTTGTTCAAGTAACGGATTCTAGCCAATTGAAAGAATCTTCT---GATCAATCTAGAGATCGTTTCAATTCT---  
ATT-----AGTAATGCGGATTCGGAATATCAC-----  
ACATTAATCAATAAAAAGAGAGATTCAACAACATAAAAAGAAAGATCGATTCTT---CGGGATCCTTCC-----  
TTTCTTCAAACGGAAGGAACAGAGATAGAATCAGAC-----CGATTCCCGAAATGCCTTTCTGGATATTCCTCA-----  
-ATGCCTCGG-----CTATTCACGGCACGTGAGAAGCAGATGATTATTCATCTGCTTCCGGAAGAA-----  
ATCGAACAACCTTCTT-----GAGAATCCTACAAGATCTATTCGT---  
TCTTTTTTCTCTGGCAGATGGTCAGAACTTCAT---CTG---  
GGTTCAAATCCTACTGAGAGGTCCACTAGAGATCCGCAATTGTTGAAGAAA-----  
-----CAACAAGATGTT---

TCTTTTGCCCCTTCCAGGCAATCGGAAAATAAAGAAATGGTTAATATATTCAAGATAATTAAGTATTTA

Triticum -----



Handwriting practice lines (18 sets).

Typa

Handwriting practice lines (18 sets).



AAATTTTTGGATGAAAACAAACATCTTGAT-----  
AGAGATAAAAATCAATTAATTAATAAATTAATAAATTAATAAAGTTATTTCTCTGGCCCAATTATCGATTAGAAAGATTTAGCTTG  
TATGAATCGCTATTGGTTTTGATACCAATAATGGTAGTTGTTTTAGTATGATAAGGATACATATGTATCCA---  
CGATTGAAAATTCGTTGA-----G--

-----ATGAAA-----GGACAT--  
---CAATTC-----AAA-----

TCTTGGATTTTTCGAATTGAGAGAGATATTGAGAGAGATCAAGAATTCTCACTATTTCTTA-----  
GATTCATGGACCAATTCACCTTCAGTGGGATCTTTTCATTACATTTTTTCCACCAAGAACGTTTTATAAACTCTTTGA  
CCCCGAATTTGGAGTATCCTACTTTTCACGCAATTCA-----  
CAGGGTTCAACAAGCAATCGATATTTTCACGATC-----AAGGGTGTA---GTACTATTT---  
GTAGTAGCGGTC---CTTATATATCGTATTAACAATCGAAAT---  
ATGGTCGAAAGAAAAATCTCTATTTGACAGGGCTTCTTCTTACCTATG-----  
AATTCATTGGACCCAGAAATGATACATTGGAAGAATCTTTTGGGTCTTCCAATATCAATAGGTTGATTGTTTTCGCTCCT  
GTATCTTCCA-----  
AAAGGAAAAAAGATCTCTGAGAGCTGTTTCTGGATCCGAAAGAGAGTACT-----  
TGGGTTCTCCCAATAACTAAA-----AAG---  
TGTATCATGCCTGAATCTAATCGGGTTTCGCGGTGGTGGAGGAAGTGGATCGGAAAAAGAGGGATTCTAGTTGTAAGAT  
ATCTAATGAAACC-----  
GTCGCTGGAATTGAGATCTCATTCAAAGAAAAAGATATCAAATATCTGGAGTTTCTTTTTGTATATTATATGGAT-----

GATCCGATCCACAAGGACCATGATTGGGAATTGTTTGATCGTCTTTCTCCGAGGAAGAGGGCGAAACATAATCAACTTGAA  
T-----  
TCGGGACAGCTATTTCGAAATCTTAGTGAAACACTGGATTTGTTATCTCATGTCTGCTTTTTCGTGAAAAAATACCAATTGA  
A---GTGGAGGGTTTTCTTCAAACAACAAGGA---  
GCTGGGTCAACTATTCAATCAAATGATATTGAGCATGTTTCCCATCTCTTCTCGAGAAAC-----  
AAGTGGGCTATTTCTTTGCAAATTTGCTCAATTTTCAATGTTGGCAATTCCGCCAAGATCTCTTCGTTAGTTGGGGGAA  
A---AATCCGCACGAATCGGATTTTTTTGAGGAAC---  
GTATCGAGAGAGAATTGGATTTGGTTAGACAATGTGTGGTTGGTAAACAAGGATCGGTTTTTTTAGC-----

AAGGTACGGAATGTATCGTCAAATATTCAATAT-----GATTCCACAAGATCT-----  
AGTTTTCGTTCAAGTAACGGATTCTAGCCAATTGAAAGGATCTTCT---GATCAATCCAGAGATCATTTCGATTCC---  
ATT-----AGTAATGAGGATTTCGAAATATCAC-----  
ACATTGATCAATCAAAGAGAGATTCAACAATAAAGAAAGATCGATTCTT---TGGGATCCTTCC-----  
TTTCTTCAAACGGAACGAACAGAGATAGAATCAGAC-----  
CGATTCCCAGAAATGCCTTTCTGGATATTCTCAATGTCAATGTCCCGG-----  
CTATTCACGGAACGTGAAAAGCAGATGATTATTCATCTGCTTCCGGAAGAA-----ATTGAAGAATTTCTT-----  
GGGAATCCTACAAGATCCATTCTG---TCTTTTTTCTCTGACAGATGGTCAGAATTCAT---CTG---  
GGTTCGAATCCTATTGAGAGGTCCACTAGAGATCAGAAATGTTGAAGAAA-----  
-----CAACAAGATGTT---

TCTTTTGTCCCTTCCAGGCGATCGGAAAAATAAGAAATGGTTAATATATTCAAGATAATTACGTATTTA  
Yucca

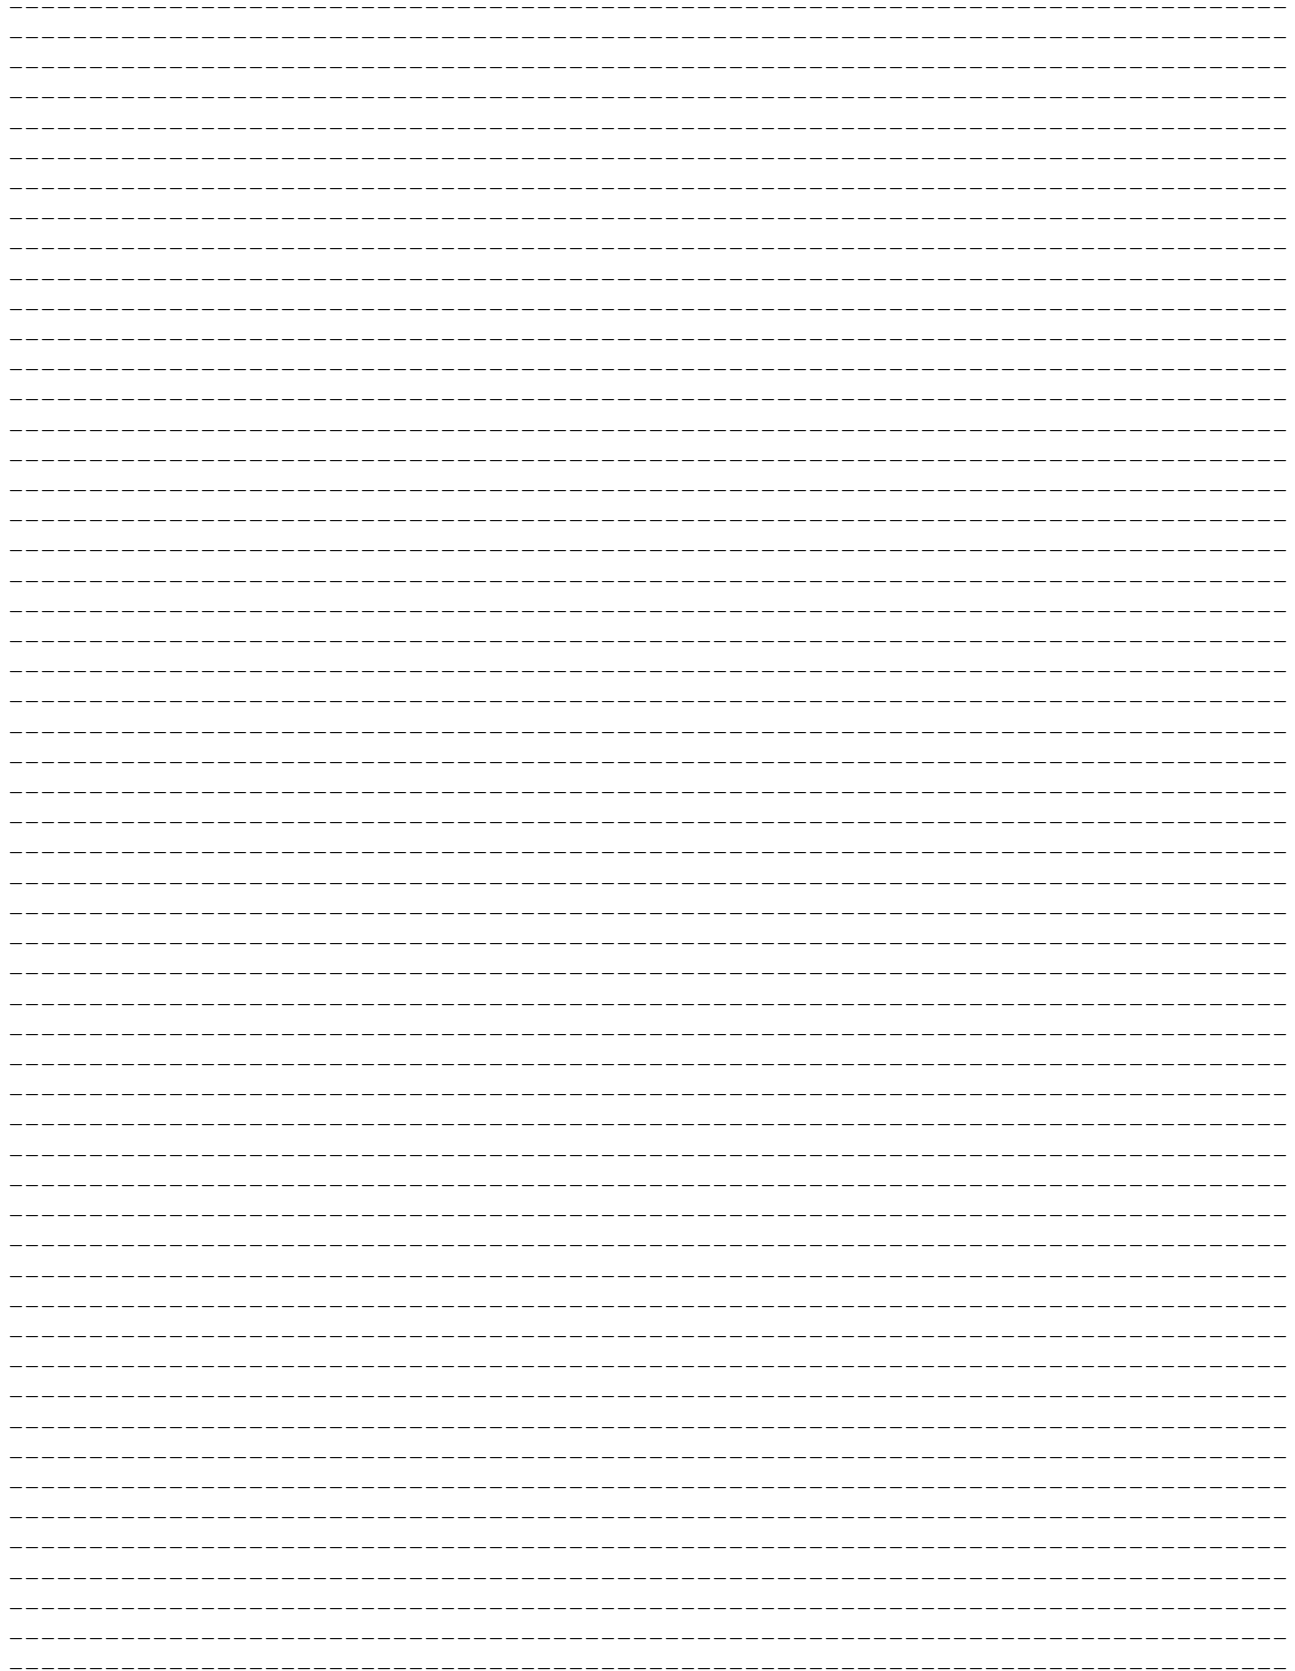

Zea

Acorus

CAAAATACCGTCTCAATTCATCCTATTTTCATCAGATCCGGGATGT-----

GATATGGTTCCGAAGGATGAACCAGATATGGACAGTTCCAATAAGATTTTCATTCTTGAACAAAAATCCATTTTTTTGATTT  
ATTTTCATCTATTCCACGATCGGAACAAGGGGGGTACACATTA-----CACCACGATTTT---GAATCA-----  
GAAGAGAGATTTCAAGAAATGGCAGATCTATTCCTCTATCAATAACCGAGCCGGATCTGGTGTATCATAGGGGATTTGC  
CTTTTCGATTGATTCC-----

TGCGGATTAGATCAAAAAAATTAGTGAATGGAAAGGAAAAACAAAGGATGAATCGAAAAAGAAATCTTTATTG-----  
-----

GTTCTACCTCCTCTTTTTTATGAAGAGAATGCCTTTTTTTATCGAAGCATCAGAAAAAACCGGTCTGGATCCACTGCGG  
GAATGATTTG-----

TTTGCTAGCAACAACATAATGGAGGCAGTCAATCAATATAGATTGATCCGAAATCTGATTCAAATCCAA-----  
TATAGCGCC-----

TATGGGTACATAAGAAATGTATTGAATCGATTCTTTTTAATGAATAGATCCGATCGCAACTTCGAATATGGAATTCAA--  
----AGGGATCAAATAGGAAATGATACTCTGAATCATATAACTATAATGAAATATACGATCAACCAACATTTATCGAAT--  
-----TTGAAA---AAGAGTCAGAAGAAATGGTTTTGATCCTCTTATT-----

TCTCGAACCGAGAGATCCATGAATCGGGATCCTAATGCATATAGATACAAATGGTCCAACGGGAGTAAGAATTTCCAGGA  
ACATTTGGAACATTTTCGTTTCTGAACAGAAGAACCGTTTT-----CAAGTA-----

GTGTTTGAT-----CAA-----TTACGTATTAAT--  
----CAATATTCGATTAATTGGTCCGAGGCTATCGACAAACAAGAT-----

-----TTGTCTAAGTCACTTCGTTTCTTTTTGTCC---AAGTCACTTCTC---  
TTTTTGTCCAAGCCACTTCGT-----

----TTCTTTTTGTCCAAGTCACTTCT---TTGTTCTTTGTGAGTATCGGGAATAGCCCC---

ATTCATAGGTCCGAGATCCACATCTATGAA---

TTGAAAGGTCCGAATGAGCCGCTCTGCAATCAGTTGTTAAAATCAATAGGTGTTCAAATCATTCAATTTGCATAAATTGAA  
ACCT-----

GATCATGATACTTCCCAAAGATCGAAATTCCTTGATCAATGGAGGAACAATATCACCATTTTTGTTCAATAAGATACCA--  
-AAGTGGATG---ATTGACTCATTCCATACTAGAAAGAATCGCAGCAAATCCTTTGCTAACACGGATTCC---

TATTTCTCAATGATATCCCACGATCGAGACAATTGGCTGAATCCCGTGAACCATTTTCATAGAAGTTCATTGATATCGTC  
TTTTTATAAAGCAAATCAACTTCGATTCTTGAATAATCCACATCACTTCTGGTTCTATTGTAACAAAAGATTCCCCTTTT  
ATGTG-----GAAAAGACCCGTATCAATAATTATGATCGTACA-----TATGGACAATTCCTCAAT-----

-----ATCTTGTTTCATTTCGCAACAAAATATTTTCTTTGTGCGTCCGGT-----AAAAAAAACATCTTTTA--  
-----CCGATTTATTCACAGGTATCTGACATATTCATACCT-----

-----AACGATTTT-----CCACAAAGT---GGTGACGAAACGTATAACTTG-----  
TACAAATCTTTCCGTTTTCCAATTTCGACCCGATCCATTGTTTCGT-----

AGAGCTCTTTACTCGATCGCAGACATTTCTGGAACACCTCTAACAGAGGAACAAATAGTCAATTTTGAAAGAACTTATTG  
TCAGCCTCTTTCA-----GATATGAATCTATCCGATTTCAGAAGGGAAGAAGTTCAT---CAGTATCTCAGT-----

TTCAATTCAAACATTGGTTTGATTACACTCCATGTTCTGAGAAAAATTTACCATACGTAAAGAGGAAAAAACAGAGTCT  
TTATCTGAGG-----

-----  
AAAAAACGG-----AGTCTTTAT-----  
CTAAAG-----AAATGCGTTGAGAAAGGGCAG-----

ATGTATAGAACCTCTCAACAACGGGATAGTGCTTTT-----TCAAATGGAAT---CTGTTCCAAACATAT---

ATGCCATGGTTCCCTTACTTCGACAGGGTGCAAATATCTAACTTCCGTCCTTTTAGATATTTTT---TCAGAC---  
CGATTGTCGATA---CTA-----

-----AGT-----AGTAGT-----CCAAAATTGGTATCCATTTTG---  
-----AATTCTATTATGCATAGATCAGATATATCACGGCTAATT-----AAAAAA-----

TGGTGGACGATTCTTCCACAA-----

TGGAATCTGATA-----AGTGAGATT-----  
TCGAGTAAGTGTTCACAGAAT-----CTTCTTCTGTCCGAA-----GAAATGATTCATCGA-----  
AATAATGAGTCACCCGTTTCAATGATATTGACACATCTGAGATCAACAAATGCTCGGGAGTTCTCTATTCAATCCTTT  
CCTTCTTCTTGTGCTGGATATCTCGTTCGTACGCATCTTCTCTTTGTTTCC-----  
CGAGTCTCTAATGAGTTACAGACAGAGTTAGAAAAGATCAAATCTTTGATGATTCCATCATAACATGATTGAGTTGCAAAA  
ACTTCTGTATAGGTATCCTACA-----  
TCTACATCTAAATCTGAATCTGAATCTGAATCTGAATATGAATATGAACTGAATTCTTTC-----  
-----  
TTGTTAAATAATCTCTTT-----GCTCTGGAACAATTA-----GATTGGAAT-----  
-----ATCGATCTCATAAGTATCATATCAAATACC-----  
ATCACTTTTTTCGAGAAATACGAGACATCTAAGTCGTACAAGTAAAGAGATCTATTCAATTGATAAGA-----  
-----GAAAGAAAA---AACGTGAAC-----  
AGTGAT-----  
TGGATTGAAGACAGAGTAGAATCCTGGGTTACGATCAATGATTTGATTGATGAGGACGAAAGAGACTTGGCGGTTTCAGTT  
CTCCACC-----TTAACGACCGAAAAAGGATTGATCAAATCTATGGAGTCTGACTCATAGTCATCTGTATCA-----  
-----  
AAGAATGATCTCGATTATCAAATAATTGAACAACCGGGATTAATTTTCTTACGATACTTAGTTGACATTCATAAAAAGGA  
TCTAATGAATTATGAGTTCAATGGATCCTGTTTAGCAGAAAAACGGATATTCTTGTCTAATTATCGGACAATCACTTATT  
CACAAACC-----CCATCT---  
CGTGGAAAACCTTTTCACTCCGCTTAGACCTATCCCCCTCA---  
AGGGGTATTTTAGTGATAGGTTCTATAGGAACTGGACGATCACATTTGGTCAAATACCTAGCGACAAAAC---  
TCCTATGTTCTTTTATTACGGTATTTCCGGACAGGGGCCTGTCTGAC---  
AGGCCTATATATTGTTTTATGGATGAGGATACCGATCCTGATGAGGATTATGACTATATTGATGATGATATCGATATCGA  
T-----  
Amborella CAAAATACCGTCTCAATTCATCCTATTTTCATCAGATCCGGGATGT-----  
-----  
GATATGGTTCCGAAGGATGAACCGGATATGGACAGTTCCAATAAGATTTTCACTTCTTGAACAAAAATCCATTTTGTGATTT  
ATTCCACCTATTCCATGGCCGGAACAAAGGTGGATACACGTTA-----CACCACGATTTT---GAATCA-----  
GAAGAGAGATTTCAAGAAAGGGCAGATCTATTCACTCTATCAATAACCGAGCCCGATCTGATGTATCATAAGGGATTTGC  
CTTTTCTATTGATTCC-----  
TACGGATTGGATCAAAAAAATTATTGAATGAGGTATTCAACTCCAGGGATGAATCGAAAAAGAAATCTTTATTG-----  
-----  
GTTCTACCTCATATTTTTTATGAAGAGAATGAATCTTTTTATCGAAGGATCAGAACAAAATCGGTCCGGATCTCCTGCAG  
GAATGGTTTGGAGATCCAAAA-----  
ATAGTGGTATTTGCTAGCAACAACATAATGGAGGCAGTCAATCAATATAGATTGATCCGAAATCTGATTCAAATCCAA--  
----TATAGCACC-----  
TATGGGTACATAAGAAATGTATCGAAGAGATTCTTTTTAATGAATAGATCCGATCGCAACTTCGAATATGGAATTCAA--  
----AGGGATCAAATAGGAAATGATACTCTGAATCATATAACTATAATGAAATATACGATCAACCAACATTTATCGAAT--  
-----TTGAAA---AAGAGTCAGAAGAAATGGTTTCGATCCTCTTATT-----  
TCTCGAACCGAGAGATCCATGAATCGGGATCCTAATGCATATAGATACAAATGGTCCAATGGGAGCAAGAATTTCCAAGA  
ACATTTGGAACATTTTCGTTTCTGAACAGAAGAACCCTTTT-----CAAGTA-----  
GTGTTTCGAT-----CGA-----TTACGTATTAAT--  
----CAACATTCGATTGATTGGTCCGAGGTTATCGACAAAACAAGAT-----  
-----TTGTCTAAGTCACTTCGTTTCTTTTTGTCC---AAGTCACTT-----  
-----  
----CTCTTTTTGTCTAAGTCACTTCT---TTTTTCTTTGTGAGTATCGGGAATATCCCC---  
ATTCATAGGTCCGAGATCCACATCTATGAA---  
TTGAAAGGTCCGAATGATCAACTCTGCAATCAGTTGTTAGAATCAATAGGTGTTCAAATCGTTCAATTTGAACAAATTGAA  
ACCTTTCTTATTA-----  
GATGATCATGATACTTCCCAAAGATCGAAATTATTGATCAATGGAGGAACAATAGCACGATTTTGGTTCAATAAGATAACC  
A---AAGTGGATG---ATTGACTCATTCCATACTAGGAATAATCGCGGGAAATCCTTTGAGAACACGGATTCC---  
TATTTCTCAATGATATCCCACGATCGAGACAATTGGCTGAATCCCGTGAAACCCTTTTCATAGGAGTTCAATTGATATCTTC  
TTTTTATAAAGCAAATCAACTTCGATTCTTGAATAATCCACATCACTTCTGTTTCTATTGTAACAAAAGATTCCCTTTTT  
ATGCG-----GAAAAGACCCGATCAATAATTATGATCTTACA-----TATGGACAATTCCTCAAT-----  
-----ATCTCGTTTCAATTCGCAACAAGATATTTTCTTTGTGCGTCCGT-----

AAAAAAAAACATGTTTTTTTGG---  
GAGAGAGATACTATTTTCACCTTCGCCAATTGAGTCACAGGTATCTGACATATTCATACCT-----  
----AACGATTTT-----CCACAAAGT---GGTGACGAAACGTATAACTTG-----  
TACAAATCTTTCCATTTTCCAACCTCGATCCGATCCATTTCGTTTCGT-----  
AGAGCTATTTACTCGATCGCAGACATTTCTGGAACACCTCTGACAGAGGAACAAAGAGTCAATTTTGAAGGAACTTATTG  
TCAGCCTCTTTCA-----GATCTGAATCTATCTGATTGAGAAGGGAAGAAGCTTGCAT---CAGTATCTCAGT-----  
TTCAATTCAAACATGGGTTTGATTACACTCCATGTTCTGAGAAATATTTACCATCCGGAAAGAGG-----  
-----  
-----  
AAAAAACGG-----AATCTTTGT-----  
CTAAAT-----AAATGCGTTGAGAAACGGCAG-----ATGTATAGAACCTTTCAA---  
CGAGATAGTGCTTTTTCAAATATCTCAAATGGAAT---CTGTTCCAAACATAT---  
ATGCCATGGTTCCTTACTTCGACAGGGTGCAAATATATAAAATTTTCATCCTTTTGTAGATACTTTT---TCAGAC---  
CCATTGCCGATA---CTA-----  
-----  
-----AGT-----AGCAGT-----CACAAATTTGTATCCATTTTT---  
-----CATGATATTATGCATGGATCG-----GCATGGTCAATTCCTCAGAAAAA-----  
TTGCGGGCGATTCTTCCACAA-----  
TGGAATCTGATA-----AGTGAGATT-----  
TCGAGTAAATGTTTACAGAAT-----CTTCTTCTGTCCGAA-----GAAATGATTCATCGA-----  
AATAATGAGTCACCCGTTCCATTGATATGGACACATCTGAGATCACCAAATCCTCGAGAGTTCTTCTATTCAAGCCTTTT  
CCTTCTTCTTGTGCTGGATATCTCGTTTCGTACACATCTTCTTTGTTTC-----  
CGAGTCTCTAGTGAGTTACATACAGAGTTAGAAAAGATCAAATCTTTGATGATTCCATCATAACATGATGGAGTTGCGAAA  
ACTTCTGGATAGTTATCCTCCA-----CCT-----  
GAACTGAATTCTTTC-----  
-----  
-----  
TGGTTAAAGAATCTCTTTCTAGTTGCTCTGGAACAATTAGGAGATTCTCCGGAAGAAATACGGGGTTCTGATTCTGGCGG  
CAACATGCTATTGGGTGGCGGTCCC-----  
GCTTATGGGGTCAAATCAATACGTTCTAAGAAGAAAGATTTGAATATCAATCTCATCGATATCATCGATCTCATAAGTAT  
CATACCAAATCCCGTCAATCCAATCACTTTTTCGATAAAATACGAGACGTTTAAAGTCGTACGAGTAAAGAGATCTATT  
TGATAAGA-----AAAAGAAA---  
AACGTGAAC-----AGCGAT-----  
TGGATTGATGGGAAAATAGAATCCTGGGTGCGAACAGTGATTTGATTGATGATGAAGAAAGAGAATTCTTGGTTCAGTT  
CTCCGCC-----TTAACGACAGAAAAAGGATTGATCAAATCTATGGAGTCTGACTCATAGTGATCCTTTTCTCA----  
-----  
AAGAATGACTCTGGTTATCAAATGATTGAACAACCGGGATCAATTTACTTACGATACTTAGTTGACATTATAAAAAGTA  
TCTAATGAATTTCTGAGTTCAATAGATCCTGTTTAGCAGAAAGACGAATATTCCTTGCTCATTATCAGACAATCACTTATT  
CACAAACCTCGTGTGGGGCTAATAGTTCTCATTTCCCATCT---  
CATGGAAAACCTTTTTGCTCCGCTTAGACCTATCCCCTTCT---  
AGGGGTATTTTAGTGATAGGTTCTATAGGAACCTGGACGATCCTATTTGGTCAAATACCTAGCGACAAAAC---  
TCCTACCTTCTTCCATTACGGTATCTCCGAACAAGTTTCTGGATGAC---  
AAGCCTAAAGGTTATCTTATTGATGATATTGATGATAGTGACGATATCGATCTTGATGATAGTAATAGTATTGATGATAG  
TGACGATGTCGATATTGGTGATAGTGATGATATCGATATT-----  
Arabidopsis CAAAATACCGTCTCAATTCATCCTATTTTCATCAGATCTGGGATGT-----  
-----  
GATATGGTTCGGAAGGATGAACTGGATATGGACAGTTCCAATAAGATTTTCAATCTTGAACAAAAATCCATTTTTTTGATTT  
ATTTTCATCTATTCCATGAACGGAAGAGGGGGGATAACAGTTA-----CGCCACGAG-----TCA-----  
GAAGAGAGATTTCAAGAAATGGCAGATCTATTCATCTATCAATAACCGAGCCGGATCTGGTGTATCATAAGGGATTTGC  
CTTTTCTATTGATTCC-----  
TACGGATTGGATCAAAGACAATTCTTGAAGGAGTTTTCAACTTCAGGGATGAATCAAAAAAGAAATCTTTATTG-----  
-----  
GTTCTACCTCCTATTTTTTATGAAGAAAATGAATCTTTTTATCGAAGGCTCAGAAAAATTTGGGTCCGGATCTCCTGCGG  
GAATTATTTGGAAGATCAAAAA-----  
AGAGTGGTATTTGCTAGCAACAACATAATGGAGGCAGTCAATCAATATAGATTGATCCGAAATATGATTCAAATCCAATT  
CCAATATAGTCCC-----  
TATGGGTACATAAGAAATGATTGAATCGATTCTTTTTAATGAAGAGACCTGATCGCAACTTCGAATATGGAATTCAA--



-----AGGGATCTAATAGGAAATGATACTCTGAATCATAGAACTATAATGAAAGATACGATCAACCAACATTTATCGAAT-----  
-----TTGAAA-----  
AAGAGTCAGAAGAAATGGTTTCGATCCTCTTATTTTTCTTTCTCAAACCGAGAGATCCATAAATCGGGATCCTAATGCATA  
TAGATACAAATGGTCCAATGGGAGCAAGAATTTCCAGGAGCATTGGAAACATTTTCGTTTCTGAGCGGAAGAGCCGTTTT--  
-----CAAGTA-----GTGTTTCGAT-----  
-----CAA-----TTATGTATTAAT-----  
CAATATTCGATTGATTGGTCTGAGGTATTGATAAAAAAGAT-----  
-----TTGTCTAAGTCACTTCGTTTCTTTTTGTCT----  
AAGTTACTTCGTTTCTTTTTGTCCAAGTTACTT-----  
CTTTTTTTGTCCAAGTTACTTCTTTTTGTCTAACTCACTTCTCT---TTTTTCTTTGTGAGTTTTCGAGAATATCCCT--  
-ATTCATAGGTCTGAGATCCACATCTATGAA---  
TTGAAAGGTCCGAACGATCAACTCTGCAATCAGTTGTTAGAATCAATAGGTCTTCAAATCGTTCAATTTGAAAAAGTTGAA  
ACCCTTTTTATTG-----  
GATGATCATAATACTTCTCAAAAATCGAAATCTTGATCAATGGAGGAACAATATCACCATTTTTGTTCATAAAAATACC  
A---AAGTGGATG---  
ATTGACTCATTCCATACTAGAAAGAATCGCAGGAAATCTTTTGATAACACGGATTTCAGCCTATTTCTCAATCGTATCCCA  
CGATCAAGACAATTGGCTGAATCCCGTGAAACCATTTTCAGAGAAGTTCATTGATATCTTCTTTTTCTAAAGCAAATCGAC  
TTCGATTCTTGAATAATCCACATCACTTCTGTTTCTATTGTAACAAAAGATTCCCTTTTTATGTG-----  
GAAAAGGCCCGTCTCAATAATTCTGATTTTACGTTTACGTATGGACAATTCCTCACT-----  
ATCTTGTTTCATTACAAACAAAACATTTTCTTCGTGCGGTGGT-----AAAAAAAACATGCTTTTTTTG---  
GAGAGAGATACTATTTACCTTCGTCAATCGAGTCACAGGTATCTAACATATTCATATCT-----  
----AACGATTTT-----CCACAAAGT---GGTGACGAAAGGTATAACTTG-----  
TACAAATCTTTCCATTTTCCAATTCGATCCGATCCATTAGTTTCGT-----  
AGAGCTATTTACTCGATTGCAGACATTTCTGGAACACCTCTAATAGAGGGACAAAGAGTCAATTTTGAAAGAACGTATTG  
TCAAATCTTTCA-----GATATGAATCTATCCGATTTCAGAAGAGAAGAGCTTGCAT---CAGTATCTCAAT-----  
TTCAATTCAAACATGGGTTTGATTACACTCCATGTTCTGAGAAATATTTA-----CAGAGG-----  
-----  
-----  
AAAAAACGG-----AGTCTTTGC-----  
CTAAAA-----AAATGCGTTGACAAAGGGCAG-----ATGGATAGAACCCTTTCAA---  
CGAGATAGTGCTTTTTCAACTCTCTCAAAATGGAAT---CTATTCCAAACATAT---  
ATGCCATGGTTCTTTACTTCGACAGGGTACAAATATCTAAATTTGATATTTTTAGATACTTTT---TCAGAC---  
CTATTGCGGATA---CTA-----  
-----  
-----AGT-----AGCAGT-----CAAAAATTTGTATCCATTTTT---  
-----CATGATATTATGCATGGATTAGATATATCATGGCGAATTCTTCAGAAAAAA-----  
TTGTGT-----CTTCCACAA-----  
AGGAATCTGATA-----AGTGAGATT-----  
TCGAGTAAGTCTTTACATAAT-----CTTCTTCTGTCCGAA-----GAAATGATTCATCGA-----  
AATAATGAGTCA-----  
TCATTGATATCGACACATCTGAGATCGCCAAATGTTTCGTGAGGTCTCTATTCAATCCTTTTCTTCTTCTTGTGCTGG  
ATATATCGTTTCGTACACATCTTCTTTGTTTCC-----  
CGAGCCTATAGTGAGTTACAGACAGAGTTCGAAAAGATCAAATCTTTGATGATTCCATCATAACATGATTGAGTTGCGAAA  
ACTTCTGGATAGGTATCCTACA-----TCT-----  
GAACTGAATTCCTTC-----  
-----  
-----  
TGTTAAAGAATCTTTTTCTAGTTGCTCTGGAACAATTAGGAGATTGTCTAGAAGAAATACGGGGT-----  
TCTGGCGCAACATGCTATGGGGTGGTGTATCC-----  
GCTTATGGGGTCAAATCAATACGTTCTAAGAAGAAAGATTTGAAAATAAATTTTCATCGATATCATCGATCTCATAAGTAT  
CATACCAAATCCCATCAATCGAATCACTTTTTTCGAGAAATACGAGACATCTAAGTCATACAAGTAAAGAGATCTATTCAT  
TGATAAGA-----AAAAGAAA---  
AACGTGAGC-----GGTGAT-----  
TGGATTGATGATAAAATAGAATCCTGGGTTCGCGAACAGTGATTTCGATTGATGATAAAGAAAGAGAATTCTTGGTTCAGTT  
CTCCACC-----TTAAGGGCAGAAAAAGGATTGATCAAATCTATTGAGTCTGACTCATAGTGATCATTATCA----  
-----  
AAGAATGACTCTGGTTATCAAATGATTGAACAACCGGAACAATTTACTTACGATACTTAGTTGACATTCAAAAAGTA

TCTAATGAATTATGAGTTCAATACATCCTGTTTAGCAGAAAGACGGATATTCTTGCTCATTATCAGACAATCACTTATT  
CACAAACTTCGTGTGGGGCTAATAGTTTTTCATTTCCCGTCT---  
CATGGAAAACCTTTTTCGCTCCGCTTAGCCCTATCCCCCTCT---  
AGGAGTATTTTGTGATAGGTTCTATAGGAACTGGACGATCCTATTTGGTCAAATACCTAGCGACAAAAC---  
TCCTATGTTCCCTTTTATTACAGTATTTCTGAACAAGTTCCTGGATAAC---  
AAGCCGAAAGGTTTTTTTTATTGATGATATC-----  
GATATTGATGATAGTGACGATATTGATGCTAGTAACGATATT-----

Atropa CAAAATACCGTCTCAATTCATCCTATTTTCATCAGATCCGGGATGT-----

GATATGGTTCCGAAGGATGAACCGGATATGGACAGTTCCTAATAAGATTTTATTCTTGAACAAAAATCCATTTTTTTGATTT  
ATTTTCATCTATTTCCATGACCGGAACAGGGGAGGATACACGTTA-----CACTACGATTTT---GAATCA-----  
GAAGAGAGATTTCAAGAAATGGCAGATCTATTTACTCTATCAATAACCGAGCCGGATCTGGTGTATCATAAGGGATTTGC  
CTTTTCTATTGATTC-----  
TGCGGATTGGATCAAAAACAATTTCTTGAATGAG-----GCCAGGGATGAATCGAAAAAGAAATCTTTTATTG-----

GTTCTACCTCCTATTTTTTATGAAGAGAATGAATCTTTTTCTCGAAGGATCAGAAAAAAATGGGTCCGGATCTCCTGCGG  
GAATGATTTGGAAGATCCAAAACCAAAA---  
ATAGTGGTATTTGCTAGCAACAACATAATGGAGGCAGTCACTCAATATAGATTGATCCGAAATCTGATTCAAATCCAA--  
----TATAGTACC-----  
TATGGTTACATAAGAAATGTATTGAATCGATTCTTTTTAATGAATAGATCCGATCGCAACTTCGAATATGGAATTCAA--  
----AGGGATCAAATAGGAAAGGATACTCTGAATCATAGAACTATAATGAAATATACGATCAACCAATATTTATCGAAT--  
-----TTGAAA---

AAGAGTCAGAAGAAATGGTTTCGAGCCTCTATTTTTGATTTCTCGAACCGAGAGATCCATGAATCGGGATCCTGATGCATA  
TAGATACAAATGGTCCAATGGGAGCAAGAATTTCCAGGAACATTTGGAACAGTCCGTTTCGGAGCAGAAGAGCCGTTTT-  
-----CAAGTA-----GTGTTTCGAT-----  
-----CGA-----TTACGTATTAAT-----  
CAATATTCGATTGATTGGTCTGAGGTTATCGCAAAAAAGAT-----  
-----TTGTCTAAGCCACTTCGTTTTCTTTTTGTCT---

AAGCCACTTCGTTTCTTTTTGTCCAAGTCACTT-----  
CTTTTTTTGTCCAAGTTGCTTTTTCTTTTTGTCTAACTCACTTCCT---TTTTCTGTGTGAGTTTTCGGAAATATCCCC--  
-ATTCATAGGTCGAGATCTACATCTATGAA---  
TTGAAAGGTCGAAATGATCAACTCTGCAATCAGTTGTTAGAATCAATAGGTCTTCAAATTTGTTTCAATTTGAAAAAATTGAA  
ACCCTTCTTATTG-----

GACGATCATGATACTTCCCAAAAATCTAAATTTCTTATGATCAATGGAGGAACAATATCACCATTTTTGTTCATAAAGATAACC  
A---AAGTGGATG---ATTGACTCATTCCATACTAGAAATAATCGCAGGAAATCCTTTGATAACCCGGATTCC---  
AATTTCTCAATGATATTCCACGATCAAGACAATTGGCTGAATCCCGTGAAACCATTTTATAGAAGTTTCAATGATATCTTC  
TTTTTATAAAGCAAATCGACTTCGATTCTTGAATAATCCACATCACTTCTGCTTCTATTGGAACACAAGATTTCCCTTTT  
CTGTG-----GAAAAGGCCCGTATCAATAATTTCTATTTTACG-----TATGGACAATTCCTCAAT-----  
-----ATCTTGTTCATTTCGCAACAAAATATTTCTTTGTGCGTCCGGT-----  
AACAAAAACATGCTTTTTTGG---GGGAGAGATACTATTTCA-----  
CCAATCGAGTCACAGGTATCTAACATATTCATACCT-----AACGATTTT-----  
CCACAAAGT---GGTGACGAAACGTATAACTTG-----

TACAAATCTTTCCATTTTCCAAGTCGATCCGATCCATTTCGTTTCGT-----  
AGAGCTATTTACTCGATCGCAGACATTTCTGGAACACCTCTAACAGAGGGGCAAATAGTCAATTTTGAAGAAGACTTATTG  
TCAACCTCTTTCA-----GATATGAATCTATCTGATTGAGAAGGGAAGAACTTGCAT---CAGTATCTCAAT-----  
TTCAATTCAAACATGGGTTTGATTACACTCCATGTTCTGAGAAAGATTTATCATCCGAAAAGAGG-----

AAAAAACGG-----AGTCTTTGT-----  
CTAAAG-----AAATGCGTTGAGAAAGGGCAG-----ATGTATAGAACCTTTCAA---  
CGAGATAGTGCTTTTTTCAACTCTCTCAAAATGGAAT---CTATTCCAAACATAT---  
ATGCCATGGTTCCTTACTTCGACAGGGTACAAATATCTAAATTTGATATTTTTAGATACTTTTT---TCAGAC---  
CTATTGCCAATA---CTA-----

-----AGT-----AGCAGT-----CAAAAATTTGTATCCATTTTT---  
-----CCTGATATTATGCATGGATCAGGTATATCATGGCGAATTCTTCAGAAAAA-----



-----

Calycanthus CAAAATACCGTCTCAATTCATCCTATTTTCATCAGATCCGGGATGT-----  
-----  
GATATGGTTC CGAAGGATGAACCGGATATGGACAGTTCCAATAAGATTTTCATTCTTGAACAAAAATCCATTTTTGGATTT  
ATTTTCATCTATTTCCATGACCGGAACAAAGGGGGATACAGTTA-----CACCACGATTTT---GAATCA-----  
GAAGAGAGATTTCAAGAAATGGCAGATCTATTTCACTCTATCAATAACCGAGCCGGGTCTGGTGGATCATAAGGGATTTGC  
CTTTTTCTATCGATTCC-----  
TACGGATTGGATCAAAAAAATTCTTGAATGAGGTATTCAACTCCAGGGATGAATCGAAAAAGAAATCTTTATTG-----  
-----  
GTTCTACCTCTATTTTTTATGAAGAGAATGAATCTTTTTATCGAAGGATCAGAAAAAATCGGTCCGGATCTCTGCGG  
GAATGATTTGGAAGATCCAAAACCAAAA---  
ATAGTGGTATTTGCTAACAAACATAATGGAGGCGGTCAATCAATATAGATTGATCCGAAATCTGATGCAAATCCAA--  
-----TATAGCACC-----  
TATGGGTACATAAGAAATGTATCGAATCGATTCTTTTTAATGAATAGATCCGATCGCAACTTCGAATATGGAATTCAA--  
-----AGGGATCAAATAGGAAATGATACTCTGAATCATCTAACTATAATAAAATATACGATCAACCAACATTTATCGAAT--  
-----TTGAAA---AAGAGTCAGAAGAAATGGTTCGATCCTCTTATT-----  
TCTCGAACCGAGAGATCCATGAATCGGGATCCTGATGCATATAGATACAAATGGTCCAATGGGAGCAAGAATTTCCAGGA  
ACATTTGGAACATTTCTGTTTTCGGAACAGAAGCACC GGTTT-----CAAGTA-----  
GTGTTTCGAT-----CGA-----TTACGTATTAAT--  
-----CAATATTCGATTGATTGGTCCGAGGTTATCGACAAAACAAGAT-----  
-----TTGTCTAAGTCACTTCGTTTTCTTTTTGTCC---AAGTCACTTCTC---  
TTTTTTGTCCAAGTCACTT-----  
-----CTCTTTTTGTCTAAGTCACTTCTCT---TTTTCTTTGTGAGTATCGGGAATATCCCC---

ATTCATAGGTCCGAGATCCACATCTATGAA---  
TTGAAAGGTCCGAATGATCAACTCTGCAATCAGTTGTTAGAATCAATAGGTGTTCAAATCGTTCATTTGAATAAATTGAA  
ACCCTTCTTATTG-----  
GATGATCATGATACTTCCCAAAGATCGAAATTCCTGATCAATGGAGGAACAATATCACCC-----  
AATAAGATACCA---AAGTGGATG---  
ATTGACTCATTCCATACTAGAAATAATCGCAGGAAATCCTTTGAGAACACGGATTCC---  
TATTTCTCAATGATATCCCACGATCGAGACAATTGGCTGAATCCCCTGAAACCATTTTCATAGAAGTTCATTAATATCTTC  
TTTTTATAAAGCAAATAGACTTCGATTCTTGAATCATCCACATCATTCTGGTTCTATTGTAACAAAGGATTCCCTTTTT  
ATGTG-----GAAAAGACCCGATCAATAATTATGATCTTACA-----TATGGACAATTCCTCAAT-----  
-----ATCTTGTTTCATTTCGCAACAAAATATTTCTTTGTGCGTCGGT-----  
AAAAAAAAACATGTTTTTTTG---GAGAGAGATACTATTTCA-----  
CCAATCGAGTCACAGGTATCTGACATATTCATACCT-----AACGATTTT-----  
CCACAAAGT---GGTGACGAAACGTATAAATTG-----  
TACAAATCTTTCCATTTTCCAATTCGATCCGATCCATTTCGTTTCGT-----  
AGAGCTATTTACTCGATCGCAGACATTTCTGGAACACCTCTAACAGAGGAACAAATAGTCAATTTTGAAAGAAGTATTG  
TCAGCCTCTTTCA-----GATATGAATCTATCTGATTTCAGAAGGGAAAAAAGTGCAT---CAGTATCTCAGT-----  
TTCAATTCAAACATGGGTTTGATTTCACACTCCATGTTCTGAGAAATATTTACCATCAGGAAAGAGG-----  
-----  
-----  
AAAAAACGG-----AGTCTTTGT-----  
CTAAAG-----AAATGCGTTGAGAAACGGCAG-----ATGGATAGAACCTTTCAA---  
CGAGATAGTGCTTTTTCAAATCTCTCAAATGGAAT---CTGTTCCAAACATAT---  
ATGCCATGGTTCCTTACTTCGACAGGGTGCAAATATCTAAATTTGACCCTTTTAGATACTTTT---TCAGAC---  
CCATTGCCGATA---CTA-----  
-----  
-----AGT-----AGCAGT-----CAAAAATTTGTATCCATTTTT---  
-----CATGATATTATGCATGGATCAGATATATCATGGCCAATTCCTCAGAAAAAA-----  
TTGTGGGCGATTCTTCCACAA-----  
TGGAATCTGATA-----AGTGAGAGT-----  
TCGAGTAAGTGTTTACAGAAT-----CTTCTTCTGTCCGAA-----GAAATGATTTCATCGA-----  
AATAATGAGTCACCCGTTCCATTGATATGGACACATCTGAGATCACCAAATGCTTGGGAGTTTCTCTATTCAATCCTTTT  
CCTTTTTCTTGTGCTGGATATCTCGTTTCGTACACATCTTCTCTTTGTTTC-----  
CGAGCCTCTAGTGAGTTACAGACAGGGTTAGAAAGGATCAAATCTTTGATGATTCCATCATAATGATTGAGTTGCGAAA  
ACTTCTGGATAGGTATCCTACA-----TCT-----  
GAACCGAATTCTTTC-----  
-----  
-----  
TGGTTAAAGAATCTCTTTCTAGTTGCTCTGGAACAATTAGGAGATTCTCTGGAAAAAATACGGGGTTCTGCTTCTGGCGG  
CAACATGCTATTGGGTGGTGGTCCC-----  
GCTTATGGGGTCAAATCAATACGTTCTAAGAAGAAATATTTGAATATCAATCTC-----  
ATCGATCTCATCAGTATCATACCCAATCCCATCAATCGAATCACTTTTTTCGAGAAATACGAGACATCTAAGTCGTACAAG  
TAAAGAGATCTATTTCATTGATAAGA-----  
AAAAGAAAA---AATGTGAAC-----GGTGAT-----  
TGGATTGATGATAAAATAGAATCCTGGGTTCGCAACAGTGATTTCGATTGATGATGAAGAAAGAGAATTCTTGGTTCAGTT  
CTCCACC-----TTAACGACGGAAAAAGGGATTGATCAAATTCATTGAGTCTGACTCATAGTGATCATTTTATCA----  
-----  
AAGAATGACTCTGGTTATCAAATGATTGAACAACCGGGATCAATTTACTTACGATACTTAGTTGACATTCAAAAAAGTA  
TCTAATGAATTATGAGTTCAATAGATCCTGTTTAGCAGAAAGACGGATATTCTTGTCTATTATCAGACAATCACTTATT  
CACAAACCTCGTGTGGGGCTAATAGTTCTCATTTCCTATCT---  
CATGGAAAACCTTTTTCGCTCCGCTTAGCCCTATCCCCTTCT---  
AGGGGTATTTTAGTGATAGTTTCTATAGGAACTGGACGATCCTATTTGGTCAAATACCTAGCGACAAAC---  
TCCTATGTTCTTTTATTACGGTATTTCCGAACAAGTTTCTGGATGAC---  
AAGCCTAAAGGTTATCGTATTGATGATATC-----  
GATATTGATGATAGTGACGATATCGATATTGATGATAGTGACGATATT-----  
-----  
-----  
Ceratophyllum CAAAATATCGTCTCAATTCATCTATTTTCATCAGATCCGGGATGT-----  
-----

GATATGGTTCCGAAGGATGAACCGGATATGGACCGTTCTAATAAGATTTTCATTCTTGAACAAAAATCCATTTTTTTGATTT  
ATTTTCATCCATTCCATGACCGGAACAAAGGGGATACACGTTA-----CACCACGATTTT---  
GAATCAGAATCAGAAGAGAGATTTCAAGAAATAGCAGATCTATTCACTCTATCAATAACCGAGCCGGATCTGGTGTATCA  
TAAGGGATTTGCCTTTTTCTATTGATTCC-----  
TACGGATTGGATCAAACAAAATTCTTGAATGAGGTATTCAACTCCAGGGATGAATCGAAAAAGAAATCTTTATTG-----  
-----  
GTTCTACCTCCTATTTTTGATGAAGAGAATGAATCTTTTTCTCGAAGGATCAGAAAAAATCGGGCCGGATCTCCTGCGG  
GAATGATTTGGAAGATCCAAAACAAAA---  
ATAGTGGTATTTGCTAGCAAGAACATAATGGAGGCAGTCAATCAATATAGATTGATCCGAAATCTGATTCAAATCCAA--  
----TATAGCACC-----  
TATGGGTACATAAGAAATGTATTGAATCGATTCTTTTTAATGAATGGATCCGATCGCAACTTCAATATGGAATTCAA--  
----AGGGATCAAATAGGAATGATACTCTGAATCATATAACTATAATGAAATATACGATCAACCAACATTTATCGAAT-  
-----TTGAAA---AAGAGTCAGAAGAAATGGTTCAATCCTCTTATT-----  
TCTAGAACCGAGAGATCCATGAATCGGGATCCTAATGCATATAGATACAAATGGTTCAATGGGAGCAAGAATTTCCAGGA  
GCACTTGAACATTTTCGTTTCTGAACAGAAGAACCCTTT-----CAAGTA-----  
GTGATCGAT-----CGA-----TTACGCATTAAT--  
----CAATATTCGATTGATTGGTCCGAGGTTATCGACAAACAAGAT-----  
-----TTGTCTAAGTCACTTCGTTTCTTTTTGTCC---AAGTCACTTCTC---  
TTTTTGTCCAAGTCACTT-----  
----CTCTTTTTGTCTAAGTCACTTCT---TTTTCTTTGTGAGTATCGGGAATATCCCC---  
ATTCATAGGTCCGAGATCCACATCTATGAA---  
TTGAAAGGTCCGAATGATCAACTCTGCAATCAGTTGTTAGAATCCATAGGTGTTCAAATCGTTCATTTGAATAAATTGAA  
ACCTTCTTATTG-----  
GATGATCATGATACTTCCCAAAGATCGAAATTTCTTGATTAATGGAGGAACAATATCACCATTTTTGTTCAATAAGATAACC  
A---AAGTGGATG---ATTGACTCATCCCATACTAGAAAAGAAATCGCAGGAAATCCTTTGATAACACTGATTCC---  
TATTTCTCAATGATATCCCCCGATCGAGACAATTGGCTGAATCCCGTCAAACCATTTTCATAGAAGTTCATTGATATCTTC  
TTTTTATAAAGCAATT-----  
CGATTCTTGAATAATCCACATCCTTTCTGTTTCTATTGTAACAAAAGATTCCCTCTTTATGTGGATGTG---  
GAAAAGGCCCGTATCAATAATTATGATCTTACA-----TATGGACAATTCCTCAAT-----  
ATCTTGTTTCAATTCGTAACAAAATCTTTTCTTTATGCGTCCGGT-----AAAAAAAACATGTTTTTTG---  
GAGAGAGATACGATTTCA-----CCAACCGAGTCACAGGTATCTGACATATTCTACCT-----  
----AACGATTTT-----CCACAAAGT---GGTGACGAAACATATAACTTG-----  
TACAAATCTTTCCATCTTCCAATTTCGATCCGATCCATTTCGTTCTG-----  
AGAGCTATTTACTCGATCGCAGACATTTATGGAACACCTCTAATAGAGGAACAATAAGTCAATTTTGAAAGAACTTATTG  
TCAGCCTCTTTCA-----GATATGAATATATCTGATTGAGAAGGGAAGAACTTCGATCATCAATATCTCAGT-----  
TTCAACTCAAACATGGGTTTGAATTCACACTCCATGTTCTGAGAAAAGATTTCCCATCCGGAAGGAGA-----  
-----  
-----  
AAAAAAAAG-----AGTATTTAT-----  
CTAAAG-----AAATGCGTTGAGAAATGGCGG-----ATGTATAGAACCTTTCAA---  
CGAGATAGTGCTTTTTCAAATCTCTCAAATGGAAT---CTGTTCCAAACATAT---  
ATGCCATGGTTCCTTACTTCGACAGGGTGCAAATATCTAAATTTACCCTTTTGTAGATACTTTT---TCAGAC---  
CCATTGCCGATA---CTA-----  
-----  
-----AGT-----AGCAGT-----CCAAAATTTGTATCCATTTTT---  
-----CATGATATTATGCATGGATCAGATATATCATGGCCAATTCGTGCAAAAAA-----  
TGTTGGGCGATTCTTCCACAA-----  
CGGAATCTGATA-----AGTGAGATT-----  
TCGAGTAAGTGTTTACAGAAT-----CTTCTTCTGTCCGAA-----GAAATGATTCATCGA-----  
AATAATGAGTCACCCGTTCCATTGATATGGACACATCTGAGATCACCAAATGCTCGGGAGTTTCTCTATTCAATCCTTTT  
CCTTCTTCTTGTGTTGCTGGATATCTCGTTTCGTACACATCTTCTTTGTTTCC-----  
CGAGCCTCTAGTGAGTTACAGACAGAGTTAGAAAAGATAAAATCTTTGATGATTCCATCATAACATGATTGATTTGCGAAA  
ACTTCTGGATAGATATCCGACA-----TCT-----  
GAACTGAATCTTTC-----  
-----  
-----  
TGGTTAAAGAATCTCTTTCTAGTTGCTCTGGAACAATTAGGAGATTTCTTGAAGAAATACGGGGTTATGCT-----







TACAAATTTTTCCCTTTTCCAATTCGATCCGATCTATTAGTTCGT-----  
AGAGCTATTTACTCGATCGCAGCCATTTCTGGAACACCTCTAACAGAGGGACAAATAGTCAATTTTGAAAGAAGCTTATTG  
TCAACCTCTTTCA-----GATATGAATCGATCTGATTGAGACGAGAAGAAGCTTGCAT---CAGTATCTCAAT-----  
TTCAATTCAAACATGGGTTTGATTACACTCCATGTTCTGAGAAATATTTACCATCCGAAAAGAGAAAGAGG-----  
-----  
-----

AAAAAACGG-----AGTCTTTGT-----  
CTAAAG-----AAATGCGTTGAGAAAGGGCAG-----ATGTCTAGAACCTTTCAA---  
CGAGACAGTGCTTTTTCAACTCTCTCAAAATGGAAT---CGATTCCAAACATAT---  
ATGCCATGGTTCCTTACTTCGACAGGGTACAAATATCTAAATTTGATATTTTAGATACTTTT---TCAGAC---  
CTATTGCCGGTA---CTA-----  
-----

-----AGT-----AGCAGT-----CAAAAATTTGTATCCATTTTT---  
-----CATGATATTATGCATGGATCAGATAGAGCATGGCGAATTCTTCAGAAAAA-----  
TGGTGT-----CTTCCACAA-----  
TGAATCTGATA-----AGTGAGATT-----  
TCGAGTAAGTGTTCATAAT-----CTTCTTCTGTCCGAA-----GAAATGATTCATCGA-----  
AATAATGAGTCA-----  
CCATTGATATCGACACATCTGAGATCGCCAAATGCTCGGGAGTTTCTCTATTCAATCCTTTCTTCTTCTTGTGCTGG  
ATATCTCGTTCATACACATCTTCTTTGTTTCC-----  
CGAGCCTATAGTGAGTTAGAGACAGAGTTCGAAAGGGTCAAATCTTTGATGATTCCACCATAACATGATTGAGTTGCGAAA  
ACTTCTGGATAGGTATCCCACA-----TCT-----  
GAACTGAATTCTTTC-----  
-----

TGGTTAAAGAATCTCTTTCTAGTTGCTCTGGAACAATTAGGAGATTCTCTAGAAGAAATACGGGGTTCTGCTTTTGGCGG  
CAACATGCTATGGGGTGGTGGTCCC-----  
GCGGATGGGGTTAAATCAATACGTTCTAAGACGAAAGATTTGAATATCAATCTCGTCGATATCACCGATCTCATAAGTAT  
CATACCAAATCCCATCAACCGAATCACTTTTTTCGAGAAATACGAGACATCTAAGTCATACAAGTAAAGAGATCTATTCA  
TGATAAGA-----AAAAGAAAA---  
AAGGGGAAC-----GGTGAT-----  
TGGATTGATGATAAAATAGAATCCTGGGTCGCGAACAGTGATTGATTGATGATAAAGAAAGAGAATTCTTGGTTCAGTT  
CTCCACCTTAACCTTAACGACAGAAAAAGGATTGATCAAATCTATCGAGTCTGACTCATAGTGATCATTTATCA-----  
-----

AAGAATGACTCTGGTTATCAAATGATTGAACAACCGGGAACAATTTACTTACGATACTTAGTTGACATTCATAAAAAGCA  
TTTTATGAATTATGAGTTCAATACATACTGTTTAGCAGAAAGACGGATATTCCTTGCTCATTATCAGACAATCACTTATT  
CACAACTTCGTGTGGGGCTAATAGTTTTTCATTTCCCATCT---  
CATGAAAACCTTTTTGCTCCGCTAGCCCTATCCCCCTCT---  
AGGGGTATTTTAGTGATAGTTCTATAGGAACCGGACGCTCCTATTTGGTCAAATACCTAGCGGCAAAC---  
TCCTATGTTCTTTTATTACAGTATTTCTGAACAAGTTCTGGATAAC---  
AAGCCTAAAGGTTTTCTTATTGATGATATCGATGATGCTAGT---GACGATATTGATGCTAGTGACGATATC-----  
-----

Coffea CAAAATACCGTCTCAATTCATCCTATTTTCATCAGATCCGGGATGT-----  
-----

GATATGGTTCGGAAGGATGAACCGGATATGGACAGTTCAAATAAGATTTTATTCTTGAACAAAAATCCATTTTTTGAATT  
ATTTTCATCTATTTCCACGCCCGAATAGGGGAGGATACACCTTA-----CACCACGATTTT---GAATTA-----  
GAAGAGAGATTTCAAGAAATGGCGGATCTATTTACTCTATCAATAACCGAGCCGGATCTGGTGTATCATAAGGGATTG  
CTTTTCTATTGATTCC-----  
-----

TACGGATTGGATCAAAAACAATTCTTGAATGAGGTATTCAACTCCAGGGATGAATCGAAAAGAAATCTTTATTG-----  
-----

GTTCTACCTCTTATTTTTTATGAAGAGAATGAATCTTTTTCTCGAAGGATCAGAAAAAATGGGTCCGGATCTCCTGCGG  
GAATGATTTGGAAGATCCACAACCAAAA---  
ATAGTGATATTTGCTAGCAACAACATAATGGGGCAGTCAATCAATATAGATTGATCCGAAATCTGATTCAAATACAA--  
---TCTAGTACC-----

TATGGGTACATAAGAAATGATTGAATCGATTCTTTTTAATGAATCGATCTGATCGCAACTTCGAATATGGAATTCAAAT  
TCAAAGGGATCAAATAGGAAAGGATACTCTGAATCATAGAATAATGAAATATACGATTAACCAACATTTATCGAAT--  
-----TTGAAA---

AAGAGTCAGAAGAAATGGCTCGATCCTCTTATTTTAATTTCTCGAACCGAGAGATCCATGAATCGGGATCCTGATGCATA  
TAGATACAAAGGGTCCAATGGGAGCAAGAATTTCCAGGAACATTTGGAACATTTCTGTTTCTGAGCAGAAGAGCCATTTT-  
-----CAAGTA-----ATGTTTGAT-----  
-----CGA-----TTACGTATTAAT-----  
CAATATTCGATTGATTGGTCTGAGGTTATCGACAAAAAGAT-----  
-----TTGTCTAAGCCACTGCGTTTCTTTTTGTCC---AAGTCACTTCTT---  
TTTTTGTCCAAGTTGCTT-----  
----TTCTTTTTGTCTAACTCACTTCT--TTTTTCTGTGTGAGTTTCGGGAATATCCCC---  
ATTCATAGGTCCGAGATCTACATCTATGAA---  
TTCAAAGGTCCGGATGATCAACTCTGCAGTCAGTTGTTAGAATCAATAGGTCTTCAAATTGTTCAATTTGAAAAAATTGAA  
ACCTTCTTATTG-----  
GATGATCATGATACTTCCAAAAATCCAAATTTCTTGATCAATGGAGGAACAATATCACCATTTTTGTTCATAAAGATACC  
A---AAGTGGATG---GTTGACTCATTCCATACTAGAAATAATCGCAGGAAATCCTTTGATAACACGGATTCC---  
TATTTCTCAATGATATTCCACGATCAAGACAATTGGCTGAATCCCGTGAAACCATTTTCATAGAAGTTCATTGATATCTTC  
TTTTTATAAAGCAAATCGACTTTCGATTCTTGAATAATCCTCATCACTTCTGCTTCTATTGTAACACAAGATTCCCCCTTT  
CTGTG-----GAAAAGGCCCGTATCAATAATTATGATTTTACG-----TATGGACAATTCCTCAAT-----  
-----ATTTTGTGCGAATGAACAAAATATTTTCTTTGTGCGTCGGT-----  
AAAAAAAACATGCTTTTGGG---GGGAGAGATACTATTTCA-----  
CCAATCGAGTCACAGGTATCTAACATATTCATACCT-----AATGATTTT-----  
CCACAAAGT---GGTGACGAAACGTATAACTTG-----  
TACAAATCTTTCCATTTTCTAAGTCGATCCGATCCATTTCGTTCTG-----  
AGAGCTATTTACTCGATCGCAGACATTTCTGGAACACCTCTAACAGAGGGACAAATAGTCAATTTTGAAAGAACTTATTG  
TCAACCTCTTTCA-----GATATGAATCTATCTGATTTCAGAAGGGGAAGAAGTTCAT---CAGTATCGCAAT-----  
TTCAATTCAAACATGGGTTTGATTTCACACCCCATATTCTGAGAAATATTTACCATCCGAAAAGAGG-----  
-----  
-----  
AAAAAACGG-----ATTCTTTGT-----  
CTAAAG-----AAATGCGTCGAAAAAGGGCAG-----ATGTATAGAACTTTTCAA---  
CGAGATAGTGCTTTTTCAACTCTCTCAAAATGGAAT---CTATTCCAAACATAT---  
ATGCCATGGTTCCTTACTTCGACAGGGTACAAATATCTAAATTTGATATTTTTAGATACTTTT---TCAGAC---  
CTATTGCCGATA---CTA-----  
-----  
-----AGT-----AGCAGT-----CAAAAATTGGTATCCATTTTT---  
-----CACGATATTATGCATGGATCGGGTATATCATGGCGAATTCTTCAGAAAAAT-----  
TTGTGT-----CTTCCACAA-----  
TGGAATCTGATA-----AGTGAGATT-----  
TCGAGTAAGTGTTACATAAT-----CTTCTTCTGTCCGAA-----  
GAAAGGATTCATCGAAATAAAAATAATGAGTCA-----  
CCATTGATATCGACACATCTGAGATCGCCAAATGTTCCGGGAGTTTCTCTATTCAACCCTTTTCTTCTTCTGTTGCTGG  
ATATCTCGTTCGTACACATCTTCTTTGTTCC-----  
CGGGTCTCTAGTGAGTTACAGACAGAGTTCGAAAAGGTCAAATCTTTGATAATTCATCATCTATGATTGAGTTGCGAAA  
ACTTCTGGATAGGTATCCTACA-----TCT-----  
GAACCAAATTCTTTC-----  
-----  
-----  
TGTTAAAGAATATCTTTCTAGCTGCTCTGGAACAATTAGGAGATTCTCTAGAAGAAATACGGGGTTCTGCTTCTGGCGG  
CAACATGCTT-----GGTCCC-----  
GCTTATGGGGTCAAATCAATACGTTCTAAGAAAAAATATTTGAATATCAATCTCATCGATATCGTCGATCTC-----  
-  
ATACCAAATCCCATCAATCGAATCACTTTTTCGAGAAATACGAGACATCTAAGTCATACAAGTAAAGAGATCTATTTCATT  
GATAAGA-----AAAAGAAAA---  
AACGTGAAC-----GGGGAT-----  
TGGATTGATGATAAAATAGAATCCTGGGTGCGAACAGTGATTGATTGGTGATGAAGAAAGAGAATTCTTGGTTCAGTT  
CTCCACC-----TTAACGACAGAAAAGGGGATTGATCAAATCTATTGAGTCTGACTCATAGTGATCATTTATCA----  
-----  
AAGAATGACTCTGGTTATCAAATGATTGAACAACCGGGAGCAATTTACTTACGATACTTAGTTGACATTCATAAAAAGTA  
TCTAATGAATTATGAGTTCAATACATTTTGTGTTAGCAGAAAGGCGGATCTTCTTGTCTATTATCAGACAATCACTTATT

CACAAACTTCGTGTGGGGCTAATAGTTTTTCATTTCCCATCT---  
CATGGAAAACCCTTTTCGCTCCGCCTAGCTTTATCCCCCTCT---  
AGGGCTATTTTAGTGATAGGTTCTATAGGAAGTGGACGATCCTATTTGGTCAAATACCTAGCGACAAAC---  
TCCTATGTTCCCTTTTCATTACGGTATTTCTGAACAAGTTCCTGGATAAC---  
AAGCCTAAAGGTTTTCTTATTGATGATATCAATATTGATGATAGTGACGATATTGATGCTAGTGACGATATC-----

Cucumis CAAAATACCGTCTCAATTCATCCTATTTTCATCAGATCCGGGATGT-----

GATATGGTTCGGAAGGATGAACTGGATATGGACAGTTCCAATAAGATTTTCATTCTTGAAGAAAAATCCATTTATTTATTT  
ATTTTCATCTATTCCATGACCGGAACAGGAGGGGATACACGTTA-----CACCACGATTTT---GAATCA-----  
GAAGAGAGATTTCAAGAAATGGCAGATCTATTCACTCTATCAATAACCGAGCCGGATCTGGTGTATCATAAGGGATTTGC  
CTTTTCTATTGATTCC-----

TACGGATTGGATCAAAAACAATTCTTGAATGAGGTATTCAACTCCAGGGATGAATCGAAAAAGAAATATTTATTG-----  
----

GTTCTACCTCCTATTTTTTATGAAGAGAATGACTCTTTTTATCGAAGGATCAGAAAAAATGGGTCCGGACCTCCCCCGG  
GAATGATTTGGAAGATCCAAAACAAAA---  
ATAGTGGTATTTGCTAGCAACAACATAATGGAGGCAGTCAATCAATATAGATTGATCCGAAATCTGATTCAAATCCAA--  
----TAT-----

TATAGGTACATAAGAAATGTATTGAATCGATTCTTTTTAATGAATAGATCCGATCGCGACTTGAATATGGAATTCAA--  
----AGGGATCAAATAGGAAATGATACTCTGAATCATAGAACTATAATGAAATATACGATCAACCAACATTTATCAAAT-  
-----TTCAAA---

AAGGGTCAGAAGAAATGGTTTCGATCCTCTTATTTTGATTTCTCGAACCGAGAGATCCATGAATCGGGATCCTAATGCATA  
TAGATACAAATGGTCCAATGGGAGCAAGAATTTCCAGGAACAT-----  
TTCATTTCTGAGCAGAAGAGCCATTTTCATTTT---CAAGTA-----GTGTTTCGAT-----  
-----CGA-----TTACGTATTAAT-----

CAATATTCGATTGATTGGTCTGAGGTTATCGATAAAAAAGAT-----  
-----TGGTCTAAGTCACTTCGTTTCTTTTTGTCC---AAGTTACTTGTT---

TTTTTGTCGAAGTTTCTT-----  
----CTTTTTTGTCTAACTCACTTCT---TTTTTCTTTGTGAGTTTCGGGAATATCCCC---

ATTCATAGGTCCGAGATCCACATCTATGAA---  
TTGAAAGGTCCGAATGATCGACTCTGCAATCAGTTGTTAGAATCAATAGGTCTTCAAATCGTTTCATTTGAAAAAATTGAA  
ACCCTTCTTATTG-----

GATGATCATTATACTTCCCAAAAATCGAAATTTCTTGATCAATGGAGGAACAATATCACCATTTTTGTTCAATAAGATACC  
A---AAGTGGATG---ATTGACTCATTGATACTAGAAATAATCGCAGGAAATCCTTTGATAACACGGATTCC---  
TATTTCTCAATGATATCCCACGATCAAGACAATTGGCTAAATCCCGTGAAACCATTTTCATAGAAGTTCATTGATATCTTC  
TTTTTATAAAGCAACTCGACTTCGATTCTTGAATAATCCACATCACTTCTGCTTCTATTGTAACAAAAGATTCCCTTTTT  
ATGTGGATTATGTGAAAAGGCCCGTATCAATAATTATGATTTTACG-----TATGGACAATTCCTCAAT-----  
-----ATCTTGTTTCATTTCGAACAAAATATTTTCTTTGTGCGGCGGT-----

AAAAAAAACATGCTTTTTTG---GAGAGAGATACTATTTCA-----  
CCAATCGAGTCACAGGTATCTAACATATTCATACCT-----AACGATTTT-----  
CCACAAAGT---GGTGCAGAAAGGTATAACTTG-----

TACAAATCTTTCCATTTTCCAATTCGATCCAATCCATTTCGTTTCGT-----  
CGAGCTATTTACTCGATCGCAGACATTTCTGTAACACCTCTAACAGAGGGACAAATAGTCAATTTTGAAAGAACTTATTG  
TCAACCTCTTTCA-----GATATGAATCTATCTGATTTCAGAGGGGAAGAAGTTCAT---CAGTATCTCAAT-----  
TTCAATTCAAACATGGGTTTGATTTCACACTCCATGTTCTGAGAAATATTTACCATCCGAAAAGAGG-----

AAAAAACAG-----AGTCTTTAT-----  
CGAAAG-----AAATGCCTTGAGAAAGGGCAG-----ATGTATAGAACCCTTTCAA---  
CGAGATAGTGCTTTTTCAACTCTCTCAAAATGGAAT---CTATTCCAAACATAT---  
ATGCCATGGTTCTTTACTTCGACAGGGTACAAATATCTAAATTTGCTATTTTTAGATACTTTTT---TCAGAC---  
CTATTGCCGATA---CTA-----

-----AGT-----AGCAGC-----CCAAAATTTGTATCCATTTTT---  
-----GATGATATTATGCATCGATCAGATAGATCATGGCGAATTCTTCGGAAAAA-----  
TTGTGT-----CTTCCACAA-----  
TGGAATCTGATA-----AGTGAGATT-----

TCGATTAAGTGTTCACCTAAT-----CTTCTTCTGTCCGAA-----GAAATGATTCATCGA-----  
 AATAATGAGTCA-----  
 CCATCGATATCGACACATCTGAGATCGCCAAATGTTTCGGGAGTTCTCTATTCAATCCTTTTCTTCTTATTGCTGT  
 ATATCTCGTTCGTACACATCTTCTCTTTGTTTCT-----  
 CGAGCCTATAGTGAGTTACAGACAGAGTTTCGAAAAGGTCAAATCTTTGATGATTCCATCATAACATGATTGAGTTGCGAAA  
 ACTTCTGGATAGGTATCCCACA-----TAT-----  
 GAACGGAATTCTTTC-----  
 -----  
 TGGTTAAAGAATCTCTTTCTAGTTGCTCTGGAACAATTAGGAGATTCTCTAGAAGAAATATGGGGTTCTGCTTCT-----  
 -----GGTGGCGGTCCC-----  
 GCTTATGGGGTCAAATCAATACGTTTCGAAGAAGAAAGATTGGAATATCAATCTC-----  
 ATCAATCTCATAAGTATCATAACCAATCCCATCAATCGAATCGCTTTTTTCGAGAAATACGAGACATCTAAGTCATAACAAG  
 TAAAGAGATATATTTCATTGATAAGA-----  
 -----AAA---AATGTGAAC-----GGTGAT-----  
 TGGATTGATGATAAAATCCAATCCTGGGTCTGGAACAGTGATTTCGATTGATGATAAAGAAAGAGAATTCTTGGTTCAGTT  
 CTCCACC-----TTAACGACAGAAAAAGGATTGATCAAATTCTATTGAGTCTGACTCATAGTGATCATTTATCA-----  
 -----  
 AAGAATGACTCTGGTTATCAAATGATTGAACAACCGGGAGTAATTTACTTACGATACTTAGTTGACATTCAGAAAAAGTA  
 TCTAATGAATTATAAGTTCAATACATCCTGTTTAGCAGAAAGACGGACATTCCTTGCTCATTATCAGACAATCACTCATT  
 CACAAACCTCGTGTGGGGCTAATAGTTTTTCATTTCCCATCT---  
 CATGGAAAACCTTTTTCGCTCCGCTTAGCCCTCTCCCCG-----  
 GGTATTTTAGTGATAGGTTCTATAGGAACCTGGACGATCCTATTTGGTCAAATACCTAGCGACAAAC---  
 TCCTATCTTCCTTTCATTACAGTATTTCTGAACAAGTTCGGGATAAC---AAGCCTAAG-----  
 TTTATTGATGATAGTGAC---GATGATAGTGACGATATTGATGATAGTGCGGATATTGATGATAGTGACGATATC-----  
 -----  
 Daucus            CAAAATACCGTCTCAATTCATCCTATTTTCATCATATCCGGGATGT-----  
 -----  
 GATATGGTTCCGAAGGATGAACCGGATATGGACAGTTCCAATAAGATTTTCAATCTTGAACAAAAATCCATTTCTTGATT  
 ATTTTCATCTATTTTCATGACCGGAACATGGGAGGATACACGTTA-----CACCATGATTTT---GAATCA-----  
 GAAGAGAGATTTCAAGAAATGGCAGATTTATTCACTCTATCAATAACCGAGCCGGATCTGGTGTATCATAAGGGATTTGC  
 CTTTTCTATTGATTCC-----  
 TACGGATTGGATCAAAAACAATTCTTGAATGAGGTATTCAACTCTAGGGATGAATCGAAAAAAAATCTTTATTG-----  
 -----  
 GCTCTACCTCCTTTTTTTTTATGAAGAGAATGAATCTTTTTATCGAAGGATCATAAAAAAATGGGTCCGGATCTCCTGCGG  
 AAATGATTTGGAAGATCCAAAACCAAAA---AAAATGGTATTTGCTAGCAACAACCTA-----  
 -----  
 AATGTATTGAATCGATTCTTTTTAATGAATAGATCCGATCGCAACTTCGAATATGGAATTCAA-----  
 AGGGATCAAATAGGAAAGGATACTCTGAATCATAGAACTAGAATGAAATATATGATCAACCAACATTTATCGAAT-----  
 -TTGAAA---  
 AAGAGTCAGAAGAGATGGTTCGATCCTCTTATTTTGATTTCTCGAACCGAGAGATCCACGAATCGGGATCCTGATGCATA  
 TAGATACAAATGGTCCAATGGGAGCAATAATTTCCAGGAACATTTGGACCATTTCTGTTTCTGAGCGGAAGAGCCGTTTT-  
 -----CGAGTA-----GTGTTTCGAT-----  
 -----CGA-----TTACGTATTAAT-----  
 CAATATTCGATTGATTGGTCTGAGGTATCGACAAAAAAGGT-----  
 -----TTGTCTAAGCCATTTCTGTTTCTTTTTGTCC---AAGTCACTTCTT---  
 TTTTTGTCCAAGTCACTT-----  
 CTTTTTTTGTCCAAGTTTCTTTTTCTTTTTGTCTAACTCACTTCTCT---TTTTTCTTTGTGAGTTTCGGGAATATCCCC--  
 -ATTCATAGGTCCGAGATCTACATCTATGAA---  
 TTGAAAGGTCCGAATGATCAACTCTGCAATCAGTTGTTAGAATCAATAGGTCTTCAAATCGTTCAATTTGAAAAAATTGAA  
 ACCCTTCTTATTG-----  
 GATGATCATGATACTTCCCAAAAATCGAAATTCTTGATCAATGGAGGAACAATATCACCGTTTTTTGTTCAATAAGATAACC  
 A---AAGTGGATG---ATTTACTCATTCCATACTAGAAATAATCGTAGGAAATCCTTTGCTAACACGGATTCC---  
 TATTTCTCAACGATATTTACGATCAAGACTATTGGCTGAATCCCGTGAAACCATTTTCATAGAAGTTCATTGATATCTTC  
 TTTTTATAAAGCAAATCAACTTCGATTCTTGAATAATCCACATCACTTCTGCTTCTATTGTAATAAAAGATTCCCTTTTT  
 ATGTG-----GAAAAGGCCCGTATCAATAATTCTGATTTTACG-----TATGGACAATTCCTCAAT-----  
 -----ATCTTGTTCAATCACAAACAAAATTTTTCTTTGTGCGTCCGT-----



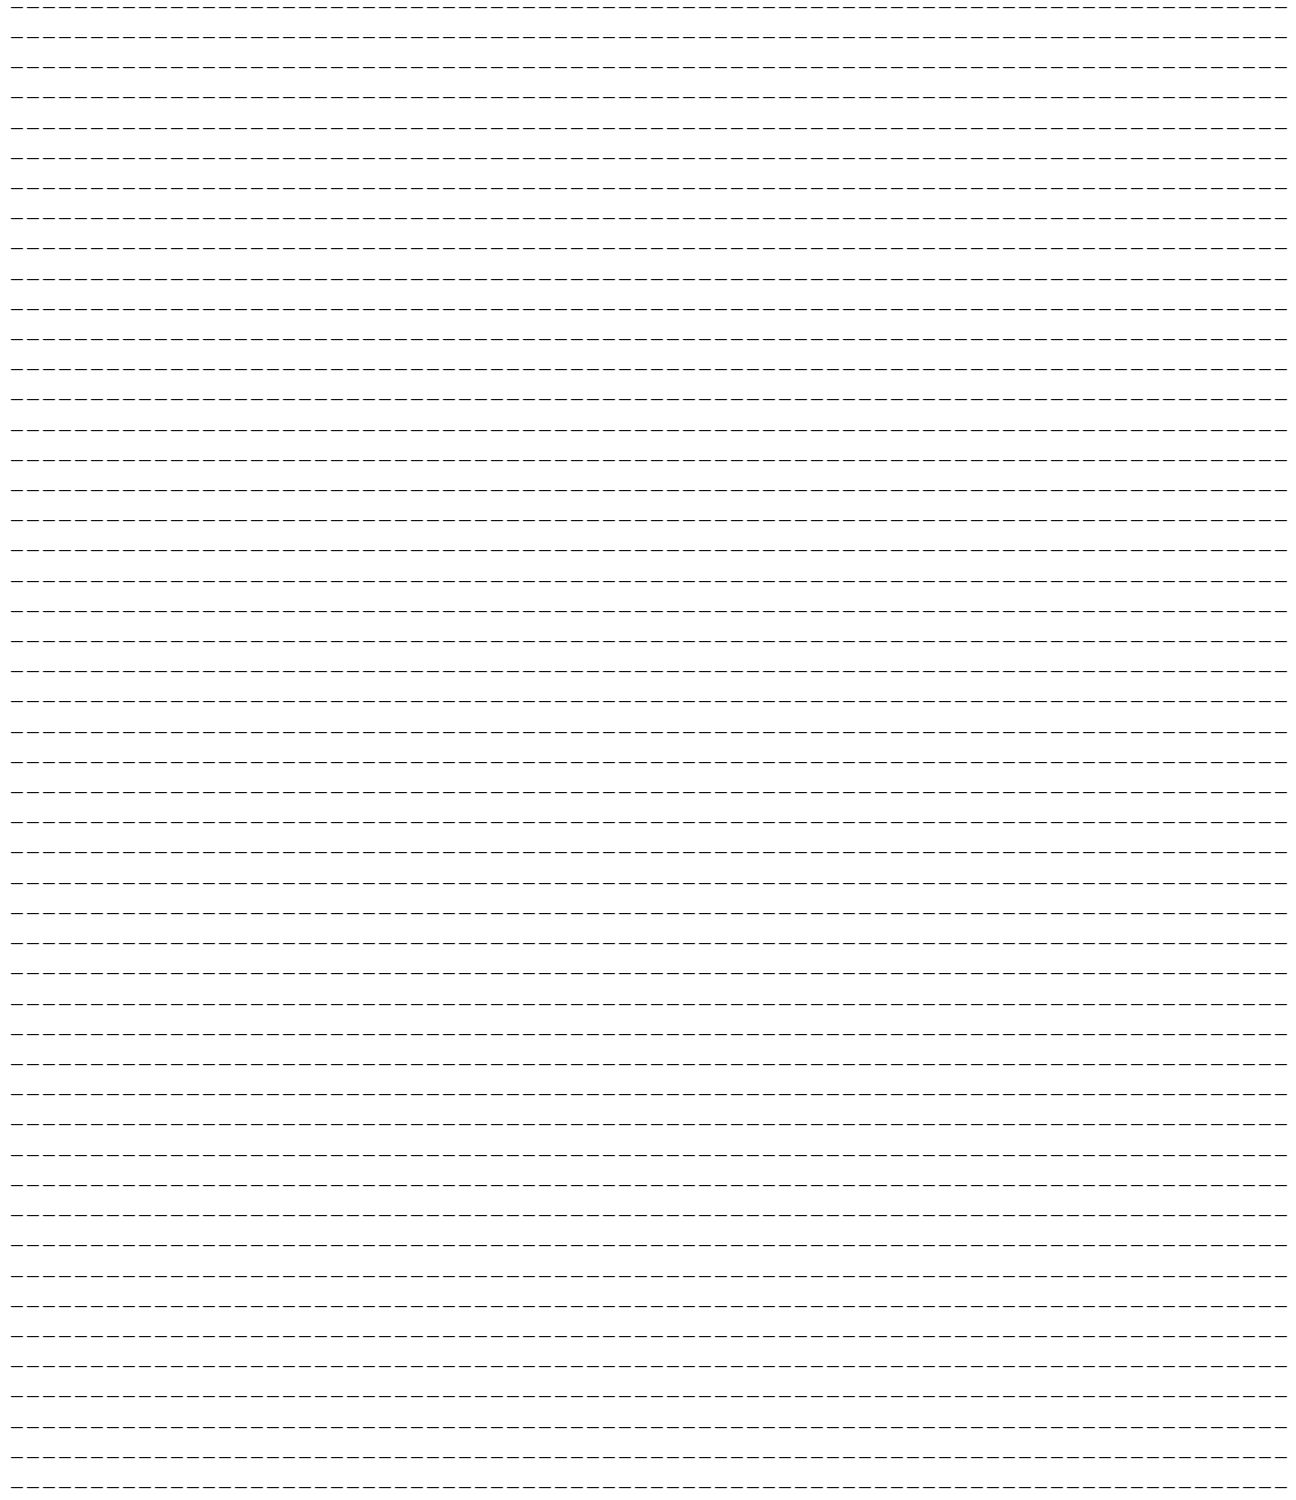

Drimys                    CAAAATACCGTCTCAATTCATCCTATTTTCATTAGATCCGGGATGT-----

-----

GCTATGGTTCCGAAGGATGAACCGGATATGGACAGTTCCAATAAGATTTTCATTCTTGAACAAAAATCCATTTTTGATT  
ATTTTCATCTATTCCATGACCGGAACAAAGGGGATAACACGTTA-----CACCACGATTTT---GAATCA-----  
GAAGAGAGATTTCAAGAAATGGCGGATCTATTTCACTCTATCAATAACCGAGCCGGATCTGGTGTATCATAAGGGATTG  
CTTTTCTATTGATTCC-----

TACGGATTGGATCAAAAAAAAAATTCTTGAATGAGGTATTCAACTCCAGGGATGAATCGAAAAAGAAATCTTTATTG-----  
-----  
GTTCTACCTCCTATTTTTTATGAAGAGAATGAATCTTTTTATCGAAGGATCAGAAAAAATCGGTCCGGATCTCCTGCGG  
GAATGATTTGGAAGATCCAAAACCCAAA---  
ATAGTGGTATTTGCTAGCAACAACATAATGGAGGCGGTCAATCAATATAGATTGATCCGAAATTTGATTCAAATCCAA--  
-----TATAGCACC-----  
TATGGGTACATAAGAAATGTATCGAATCGATTCTTTTTAATGAATAGATCCGATCGCAACTTTGAATATGGAATTCAA--  
-----AGGGATCAAATAGGAAATGATACTCTGAATCATCTAACTATAATCAAATATACGATCAACCAACATTTATCGAAT--  
-----TTGAAA---AAGAGTCAGAAGAAATGGTTCGATCCTCTTATT-----  
TCTCGAACCAGAGATCCATGAATCGGGATCCTGATGCATATAGATACAAATGGTCCAATGGGAGCAAGAACTTCCAGGA  
GCATTTGGAACATTTTCGTTTCTGAACAGAAGCACCCTTTT-----CAAGTA-----  
GTCTTCGAT-----CGA-----TTACGTATTAAT--  
-----CAATATTCGATTGATTGGTCCGAGGTTATCGACAAACAAGAT-----  
-----TTGTCTAAGCCACTTCGTTTCTTTTTGTCC---AAGTCACTTCTC---  
TTTTTGTTCAAGTCACTT-----  
-----CTCTTTTTGTCCAAGTCACTTCT---TTTTTCTTTGCGAGTATCGGGAATATCCCC---  
ATTCATAGGTCCGAGATCCACATCTATGAA---  
TTGAAAGGTCCGAATGATCAACTCTGCAATCAGTTGTTAGAATCAATAGGTGTTCAAATCGTTCATTTGAATAAATTGAA  
ACCCTTCTTATTG-----  
GATGATCATGATACTTCCCAAAGATCGAAATCTTGATCAATGGAGGAACAATATCACCATTTTTTTTTCAATAAGATAACC  
A---AAGTGGATG---ATTGACTCATTCCATACTAGAAATAATCGCAGGAAATCCTTTGATAACACTGATTCC---  
TATTTCTCAATGATATCCCACGATCGAGACAATTGGCTGAATCCTGTGAAACCATTTTCATAGAAGTTCATTGATATCTTC  
TTTTATAAAGCAAATCGACTTCGATTCTTGAATAATCCACATCACTTCTGGTTCATTGTAACAAAAGATTCCCTTTTT  
ATGTG-----GAAAAGACCCGTATCAATAATTATGATCTTACA-----TATCGACAATTCCTCAAT-----  
-----ATCTTGTTCATTGCAACAAAATATTTTCTTTGTGCGTCCGT-----  
AAAAAAAAACATGTTTTTTTG---GAGAGAGATACTATTTCA-----  
CCAATCGAGTCACAGGTATCTGACATATTCATACCT-----AATGATTTT-----  
CCACAAAGT---GGTGACGAAACGTATAACTTG-----  
TACAAATCTTTCCATTTTCCAATTCGATCCGATCCATTTCGTTTCGT-----  
AGAGCTATTTACTCGATCGCAGACATTTCTGGAACACCTCTAACAGAGGAAGAAATAGTCAATTTTGAAAGAACTTATTG  
TCAGCCTCTTTCA-----GATATGAATCTATCTGATTGAGAAGGGAAGAACTTGCAT---CAGTATCTCAGT-----  
TTCAATTCAAACATGGGTTTGATTACACTCCATGTTCTGAGAAATCTTTACCATCCGGAAAGAGG-----  
-----  
-----  
AAAAAACGG-----AGTCTTTGT-----  
CTAAAG-----AAATGCGTTGAGAAAGGGCAG-----ATGTATCGAACCTTTCAA---  
CGAGATAGTGCTTTTTCAAATCTCTCAAAATGGAAT---CTGTTCCAAACATAT---  
ATGCCATGGTTCCTTACTTCGACAGGGTGCAAATATCTCAATTTACCCTTTTAGATACTTTT---TCAGAC---  
CCATTGCCGATA---CTA-----  
-----  
-----AGT-----AGCAGT-----CAAAAATTTGTATCCATTTTT---  
-----CATGATATTATGCATGGATCGGATATATCATGGCCAATTCCTCAGAAAAAA-----  
TGGTGGGCGATTCTTCCACAA-----  
TGGAATCTGATA-----AGTGAGATT-----  
TCGAGTAAGTGTTTACAGAAT-----CTTCTTCTGTCCGAA-----GAAATGATTCATCGA-----  
AATAATGAGTCACCCGTTCCATTGATATGGACACATCTGAGATCACCAAATGCTCGGGAGTTCCTCTATTCAATCCTTTT  
CCTTCTTCTTGTGCTGGATATCTCGTTCGTACACATCTTCTTCTCGTTTCC-----  
CGAGCCTCTAGTGAGTTACAGACAGAGTTAGAAAAGATAAAAATCTTTGATGATTCATCATAACATGATTGAGTTGCGAAA  
ACTTCTGGATAGGTATCCTACA-----TCT-----  
GAACTGAATTCTTTC-----  
-----  
-----  
TGGTTAAAGAATCTCTTTCTAGTTGCTCTGGAACAATTAGGAAATCTCTGGAAGAAATACGGGGTCTGCTTTTTGGCGG  
CAACATGCTATTGGGTGGTGGTCCC-----  
GCTTATGGGGTCAAATCAATACGTTCTAAGAAGAAATATTTGAATATCAATCTCATCGATATCATCGATCTCATAGGTAT  
CATAACAAATCCCATCAATCGAATCACTTTTTTCGAGAAATACGAGACATCTAAGTCGTACAAGTAAAGAGATCTATTCAT  
TGATAAGA-----AAAAGAAA---

AACGTGAAC-----GGTGAT-----  
TGGATTGATGAGAAAATAGAATCCTGGGTCGCGAACAGTGATTTCGATTGATGATGAAGAAAGAGAATTCTTGGTTTCAGTT  
CTCCACC-----TTAACGACAGAAAAAGGATTGATCAAATTTCTATTGAGTCTGACTCATAGTGATCATTATCA-----  
-----  
AAGAATGACTCTGGTTATCAAATGATTGAACAACCGGGATCAATTTACTTACGATACTTAGTTGACATTCATAAAAAGTA  
TCTAATGAATTATGAGTTCAATAGATCCTGTTTAGCAGAAAGACGGATCTTCTTGTCTATTATCAGACAATCACTTATT  
CACAAACCTCGTGTGGGGCTAATAGTTCTCCTTTCCCATCT---  
CATGGAAAACCTTTTTCGCTCCGCTTAGACCTATCCCCTTCT---  
AGGGGTATTTTAGTGATAGGTTCTATAGGAACTGGACGATCCTATTTGGTCAAATCCCTAGCGACAAAAC---  
TCCTATGTTCTTTTCATTACGGTATTTTCGAACAAGTTCTGGATGAC---  
AAGCCTAAAGGTTATCTTATTGATGATATCGATATTGATGATAGTGACGATATCAATATTGATGATAGTGACGATATT--  
-----  
Eucalyptus      CAAAATACCGTCTCAATTCATCCTATTTTCATCAGATCCGGGATGT-----  
-----  
GATATGGTTCGGAAGGATGAACTGGATATGCACAGTTCCCATAAGATTTTCATTCTTGAACAAAAATACATTTTTTTGATTT  
ATTTTCATCTGTTCCATGACCGGAACAGGGGGGATAACAGTTA-----CACCACGATTTT---GAATCA-----  
GAAGAGAGATTTCAAGAAATGGCAGATCTATTCACTCTATCAATAAGCGAGCCGGATCTGGTGTATCATAAGGGATTTGC  
CTTTTCTATGGATTCT-----  
TACGTATTGGATCAAAAACAATTCTTGAATGAGGTATTCAACTCCAGGGATGAATCGAAAAAGAAATCTTTATTG-----  
-----  
GTTCTACCTCCTCTTTTTTATGAAGAGAATGAATCTTTTTATCGAAGGATCAGAAAAAATGGGTCCGGATCTCCTGCGG  
GAATGATTTGGAAGATCCAAAACCAAAA---  
ATAGTGGTATTTGCTAGCAACAACATAATGGAGGCAGTCAATCAATATAGATGGATCCGAAATCTGATTCAAATCCAA--  
-----TATAGCACC-----  
TATGGGTACATAAGAAATGTATGGAATCGATTCTTTTTAATGAATAGATCCGATCGCAACTTCGAATATGGAATTCAA--  
-----AGGGATCAAATAGGAAATGATACTTTGAATCATAGAACGATAATGAAATATACGATCAACCAACATTTATCGAAT-  
-----TTGAAA---  
AAGAGTCAGAAGAAATGGTTCAATCCTCTTATTTTTATTTCTCGAACCGAGAGATCCGTGAATCGGGATCCTAATGCATA  
TAGATACAAATGGTCCAATGGGAGCAAGAATTTCCAGGAACATTTGGAACATTTCTGTTTCTAAGCAGAAGAGCCGTTTT-  
-----CAAGTA-----GTCTTCGAT-----  
-----CGA-----TTACGTATTAAT-----  
CAATATTCGATTGATTGGTCTGAGGTTATCGACAAAAAGAT-----  
-----TTGTCTAAGTCACTTCGTTTTGTTTGTCC---AAGTTACTTCTC---  
TTTTTGTCCAAGTTTCTT-----  
-----CTTTTTTTGTCTAACTCACTTCT---TTTTTCTTTGTGAGTTTCGGGAATACCCCC---  
ATTCATAGGTCCGAGATCCACGTCTATGAA---  
TTGAAAGGTCCGAATGATCAACTCTGCAATCAGTTGTTAGAATCAATAGGTCTTCAAATCGTTTCAATTTGAAAAAATGGAA  
ACCATTATTATTG-----  
GATGATCATGATACTTCCCAAAAATCGAAATTATTGATCAATGGAGGAACAATATCACCATTTTTTTTTCAATAAGATAACC  
A---AAGTGGATG---ATTGACTCATTCCATACTAGAAATAATCGCAGGAAATCTTTTGATAACACGGATTCC---  
TATTTCTCAATGATATCCCACGATCAAGACAATTGGCTGAATCCCGTGAAACCATTTTCATAGAAGTTTCATTGATATCTTC  
TTTTTATAAAGCAAATCGACTTCGATTCTTGAATAATCCACATCACTTCTGCTTCTATTGTAACAAAAGATTCCCCTTTT  
ATGTG-----GAAAGGGCCCGTATCAATAATTCTGATTTTACA-----TATGGACAATTCTCAAT-----  
-----ATCTTGTTTCATTGCAACAAAATATTTCTTTGTGCGGCGGT-----  
AAAAAAAATACGCTTTTTTG---GAGAGAGATACTATTTCA-----  
CCAATCGAGTCACAGGTATCTAACATATTCATACCT-----AACGATTTT-----  
CCACAAAAGT---GGTGACGAAAGGTCTAACTTG-----  
TACAAATCTTTCCATTTTGCAATTCGATCCGATCCATTAGTTTCGT-----  
AGAGCTATTTACTCGATCGCAGACATTTCTGGAACACCTCTAACAGAGGGACAAAATAGTCAATTTTGAAAGAACTTATTG  
TCAACCTCTTTCA-----GATATGAATCTATCTGATTGAGAAGGGGAAGAACTTGTAT---CAGTATCTCAAT-----  
TTCAATTCAAACATGGGTTTGATTACACTCCATGTTCTGAGAAATATTTACCATCCGAAAAGAGG-----  
-----  
-----  
AAAAAACGG-----AGTCTTTGT-----  
CTAAAG-----AAATGCGTTGAGAAAGGACAG-----ATGTATAGAACCTTTCAA---  
CGAGATAGTGCTTTTTTCAACTCTCTCAAATGGAAT---CTATTCCAAACATAT---  
ATGCCATGGTTCCTTACCTCGACAGGGTACAAATATCTAAATTGGATATTTTTAGATACTTTT---TCAGAC---



CTATTGCCGATA---CTA-----  
-----  
-----AGT-----AGCAGT-----CAAAAATTTGTATCCATTTTT---  
-----CATGATATTATGCATGGATCAGATATATCATGGCAAATTCCTTCAGAAAAAA-----  
TTCTGT-----CTTCCACAA-----  
TGAATCTGATA-----AGTGAGATT-----  
TCGAGTAAGTGTTTACATAAT-----CTTCTTCTGTCCGAA-----GAAATGATTCATCGA-----  
AATAATGAGTCA-----  
CCATTGATATCGACCCATCTGAGATCTCCAAATGTTCCGGGAGTTCCCTCTATTCAATCCTTTTCCTTCTTCTTGTGCTAC  
ATATATCGTTTCGTACACATCTTCTCTTTGTTTCC-----  
CGAGCCTATAGTGAGTTACAGACAGAGTTTCGAAAAGGTCAAATCTTGGATGATTCCATCATAACATGATGGAGTTGCGAAA  
ACTTCTGGATAGGTACCCTACA-----TCT-----  
GAACTGAATTCCTTC-----  
-----  
TGGTTAAAGAATCTCTTTCTAGTTGCTCTGGAAAAATTAGGAGATTCTCTAGAAGAAATACGGGGTTCTGCTTCTGGCGG  
CAACATGCTATGGGGTGGTGGTCCC-----  
GCTTATGGGGTTCAAATCAATACGTTCTAAGAAGAAATATTGGAATATCAATCTC-----  
ATCGATCTCATAAGTATCATAACCAAATCCCATCCATCGAATCACTTTTTTCGAAAAAGACGAGACATCTAAGTCATAACAAG  
TAAAGAGATCTATTCATTGATAAGA-----  
AAAAGAAA--AATGTGAAC-----GGTGAT-----  
TGGATTGATGATAAAATAGAATCCTGGGTCGCGAACAGTGATTTCGATTGATGATAAAGAAAGAGAATTCTTGGTTCAGTT  
TTCCACC-----TTAACGACAGAAAAGGGATTGATCAAATCTATTGAGTTTGACTCATAGTGATCATTATCA-----  
-----  
AAGAATGACTCTGGTTATCAAATGATTGAACAACCGGGAGCAATTTACTTACGATACTTAGTTGACATTCATAAAAAGTA  
TCTAATGAATTATGAGTTCAATACATTCTGTTTTAGCAGAAAAGACGGATATTCCTTGCTCATTATCAGACAATCACTTATT  
CACAAACCTCGTGTGGGACTAATAGTTTTTCATTTACATCT---  
CATGGAAAACCCTTTTCGCTCCGCTTAGCCCTATCCCCTTCT---  
AGGGGTATTTTTAGTGATAGGTTCTATAGGAAGTGGACGATCCTATTTGGTCAAATACCTAGCGACAAAAC---  
TCCTATGTTCCCTTTTCATTACAGTATTTCTGAACAAGTTCCCTGGATAAC---  
AAGCCTAAAGGTTTTCTTATTGATGATATCGATATTGAGGATAGTGACGATATTGAGGATAGTGACAATATT-----  
-----

Ginkgo



CAATATTCGATTGATTGGTCTGAAGTTATCGACAAAAAAGAT-----  
-----TTGTCTAAGTCACTTTGTTTCTTTTTGTCC---AAGTTACTTCTT---  
TTTTTGCCCAAGTTTCTT-----  
----CTCTTTTTGTCTAACTCACTTCCTTCTTTTTTCTTTGTGAGTTTTGGGGGTATCCCC---  
ATTCATAGGTCCGAGATCCACATCTATGAA---  
TTGAAAGGTCCGAATAATCCACTCTGTAATCAGTTATTAGAATCAATAGGTCTTCAAATCTTTTCATTTGAAAAAATGGAA  
ACCCTTATTATTG-----  
GATGACCAAGATACTTCCCAAAAAATCGAAATTCTTGATCAATGGAGGAACAATATCACCATTTTTGTTCATAAAGATAACC  
A---AAGTGGATG---ATTGACTCATTCCATACTAGAAAAGAATCGCAGGAAATCTTTTGATAACACAGATTCC---  
TATTTCTCAATGATATCCCACGATCCAGACAATTGGCTGAATCCCGTGAAACCATTTTCATAGAAGTTCATTGATATACTC  
TTTTTATAAAGCAAATCGACTTCGATTCTTGAATAATCAATATCACTTCTGCTTCTATTGTAACAAAAGATTCCCTTTTT  
ATGTG-----GAAAAGGCCTGTATCAATAATTATGATTTTACG-----TATGGACAATTCCTCAAT-----  
-----ATCTTGTTTCATTTCGCAACAAAATCTTTTCTTTTTGCGATGGT-----  
CAAAAAAACATGCTTTTTTG---AAGAGAGATACTATTTCA-----  
CCAATCGAGTCACAGGTATCTAACATATTGATACCT-----AACGATTTT-----  
CCACAAAGT---GGCGACGAAGGGTATAACTTG-----  
TACAAATCTTTCCATTTTCCAATTTCGATACGATCTATTTCGTTCTG-----  
GGAGCTATTTACTCGATCGCAGACATTTCTGGAACACCTCTAACAGAGGGACAAATAGTCCATTTTGAAAAAACTTATTG  
TCAACCTCTTTCA-----GATATGAATATACCTGATTTCAGAAGGGGAAGAAGTTCAT---CAGTATCTCAAT-----  
TTCAATTCAAACATGGGTTTGATTACACTCCATGTTCTGAGAAATATTTACCATCCGAAAAAAGG-----  
-----  
-----  
AAAAAACGG-----AGTCCTTGT-----  
CTAAAA-----AAATGCCTTGAGAAAGGGCAG-----ATGTATAGAACCTTTCAA---  
CAAGATAGTGTTTTTTCAACTCTCTCAAAATGGAAT---CTATTCCAAACATAT---  
ATACCATGGTTCCTTACCTCGACAGGGTACAAATATCTAAATTTTCATATTTTTAGATACTTTT---TCAGAC---  
CTATTGCCGATA---CTA-----  
-----  
-----AGT-----AGCAGC-----CAAAAATTTGTATCCATTTTT---  
-----CATGATATTATGCATGGGTGAGATATATTATGGCGAATTCGTGAGATTCCA-----  
TTGTGT-----CTTCCACAA-----  
TGGAACTGATAAGTGAGATATGGAATCTGATA-----AGTGAGATT-----  
-----CCGGGTAATTGTTTACATAAT-----CTTCTTCTGTCCGAA-----  
GAAATTATTCATCGA-----AATAATGAGTTA-----  
CTATTAATATCGACACATCTGAGATCGCTAAATGTTTCAGGAGTTCTTCTATTCAATCCTTTTTCTTCTCCTTGTTGCTGG  
ATATCTCGTTTCGTACACATCTTCTCTTTGTTTCT-----  
CGAGTCTATAGTGAGTTACAGACAGAGTTCGAAAAGGTAAAATCTTTGATGATTCCATCATAACATGATTGAGTTGCGAAA  
ACTTCTGGATAGGTATCCTACA-----TCT-----  
GAACTGAATTCTTTC-----  
-----  
-----  
TGGTTAAAGAATCTCTTTCTAGTTGCTCTGGAACAATTAGGAGATTCTCTAGAAGAAATACGGAGTTTTGCTTTTTGGTGG  
CAACATGCTATGGGGTGGTGGTCCC-----ACTTATGGGGTCAAATCAATACGTTCTAAGAAGAAATATTTG-----  
AATCTC-----  
ATCGATCTCATAAGTATTATACCAAATCCCATCAATCGAATCGCTTTTTTCGAGAAATACGAGACATCTAAGTCATCCAAG  
TAAAACAATCTATTCTTGATAAGA-----  
AAAATAAAA---AACGTGAAT-----GGTGAT-----  
TGGATTGATGATAAAATAGAATCCTGGGTCTTGAACAGTAATTCGATTGATGATAAAGAAAGAGAATTCTTGGTTTCAGTT  
TTCTACC-----TTAACGACAGAAAAAGGATTGATCAAATCTATTGAGTCTGACTCATAGTCATCATTATCA-----  
-----  
AAGAATAACTCTGGTTATCAAATGATTGAACAACCGGGGAGCAATTTACTTACGATATTTAGTTGACATTCAAAAAAGTA  
TCTAATGATTTATGAATTCAATACATCCTGTTTAGCAGAAAGACGTATATTCCTTGCTAATTATCAGACAATTACTTATT  
CACAAACCTTGGCGGGGGCTAATAGTTTTTCATTTCCCATCT---  
CATGGAAAACCTTTTTCGCTCCGCTTAGCCCTACCTCCCCCTAGTAGGGGTATTTTAGTGATAGGTTCTATAGGAACTGG  
ACGATCCTATTTGGTCAAATACCTAGCGACAAAC---  
TCCTATGTTCTTTTCATTACAGTATTTCTGAACAAGTTCCTGGATAAC---AAGCCTAAGGGTTTTCTTATTGATGAT--

-----AGTGACGATATTGATGATAGTTACGATAGTGACGATATC-----  
-----  
Gossypium CAAAATACCGTCTCAATTCATCCTATTTTCATCAGATCCGGGATGT-----  
-----GATATGGTCCGAAGGATGAACTG-----  
GGCAGTTCCAATAAGATTTTATTCTTGAACAAAAATCCATTTTTTTGATTTATTTTCATCTATTCCATGACCAGAACAGGAG  
GGGATACACGTTA-----CACCACGATTTT---GAATCA-----  
GAAGAGAGATTTCAAGAAATGGCAGATCTATTCACTCTATCAATAACCGAGCCGGATCTGGTGTATTATAAGGGATTTGC  
CTTTTCTATTGATTCC-----  
TACGGATTGGATCAAAAACAATTCTTGAATGAGGTATTCAACTCCAGGGATGAATCGAAAAAGAAATCTTTATCG-----  
-----  
GCTCTACCTCCTATTTTTTATGAAGAAAATGAATCTTTTTTATCGAAGGATCAGAAAAAATGGGTCCGGATCTCCTGCGG  
GAATGATTTGGAAGATCCAAAACCAAAA---  
ATAGTGGTATTTGCTAGCAACAACATAATGGAGGCAGTCAATCAAGATAGATTGATCCGAAATCTGATTCAAATCCAA--  
-----TATAGCACC-----  
TATGGGTACATAAGAAATGTATTGAATCGATTTCATTAAGAAGATCGATCCGATCGCAACTTCGAATATGGAATTCAA--  
-----AGGGATCAAATAGGAAATGATACTCTGAATCATAGAACTATAATGAAATATACGATCAACCAACATTTATCGAAT--  
-----TTGAAA---  
AAGAGTCAGAAGAAATGGTTCGATCCTCTTATTTTTGATTTCTCGGACCGAGAGATCCATGAATCGGGATCCTAATGCATA  
TAGATACAAATGGTCCAATGGGAGCAAGAATTTCCAGGAGCATTTCGTTTCTGAGCAGAAGAGCCGTTTT-  
-----CAAGTA-----GTGTTTCGAT-----  
-----CGA-----TTACGTATTAAT-----  
CAATATTCGATTGATTGGTCTGAGGTTATCGACAAAAAGAT-----  
-----TTGTCTAAGTCACTTCGTTTCTTTTTGTCC---AAGTTACTTCTC---  
TTTTTGTCCAAGTTGCTT-----  
-----CTCTTTTTGTCTAACTCACTTCTCT---TTTTTCTTTGTGAGTTTCGGGAATATCCCC---  
ATTCATAGGTCTGAGATCCACATCTATGAA---  
TTGAAAGGTCCGAATGATCAACTTTGCAATCAGTTGTTAGAATCAATAGGTCTTCAAATCGTTTCATTTGAAAAAATTGAA  
ACCTTTCTTATTG-----  
GATGATCATAATACTTCTCAAAAACCGAAATTTCTTGATCAATGGAGGAACAATATCACCATTTTTGGTCAATAAGATACC  
A---AAGTGGATG---ATTGACTCATTCCATACTAGAAATAATCGCAGGAAATCTTTTGATAACATGGATTC-----  
--  
TCAATGATATCCCACGATCAAGACAATTGGCTGAATCCCGTGAAACCATTTTCATAGAAGTTCATTGATATCTTCTTTTTTA  
TAAAGCAAATCGACTTCGATTCTTGAATAATCCACATCACTTCTGCTTCTATTGTAACAAAAGATTCCCTTTTTTATGTG-  
-----GAAAAGGCCCGTATCAATAATTATGATTTTACG-----TATGGACAATTCCTCAAT-----  
-----ATCTTGTTCATTTCGCAACAAAATATTTTCTTTGTGCGGTGGT-----AAAAAAAACATGCTTTTTTTG---  
GGGAGAGATACTATTTACCTTCACCAATCGAGTCGCAGGTATCTAACATATTCATATCT-----  
-----AATGATTTT-----CCACAAAGT---GGTGACGAAAGGTATAACTTG-----  
TACAAATCTTTCCAGTTTGCAATTCGATCCGATCCATTAGTTTCGT-----  
AGAGCTATTTACTCGATTGCAGACATTTCTGGAACACCTCTAACAGAGGGACAAATAGTCAATTTTGAAAGAACTTATTG  
TCAACCTCTTTCA-----GATATGAATCCATCTGATTTCAGAAGAGAAGAACTTGAT---CAGTATCTCAAT-----  
TTCAATTCAAACATGGGTTTGATTACACTCCATGTTCTGAGAAATATTTACCATCCGAAAAGCGG-----  
-----  
-----  
AAAAAACGG-----AGTCTTTGT-----  
CTAAAG-----AAATGCGTTGAGAAAGGGTGG-----ATGTATAGAACCTTTCAA---  
CGAGATAGTGCTTTTTCAACTCTCTCAAAACGGAAT---CTATTCCAAACATAT---  
ATGCCATGGTTCCCTTACTTCGACAGGGTACAAATATCTAAATTTGATATTTTTAGATACTTTT---TCAGAC---  
CTATTGCCGATA---CTA-----  
-----  
-----AGT-----AGCAGT-----CAAAAATTTGTATCCATTTTT---  
-----CATGATATTATGCATGGATCAGATATATCATGGCGAATTCTTCAGAAAAA-----  
TTGTGT-----CTTCCACAA-----  
TGGAACTGATA-----AGTGAGATT-----  
TCGAGTAAGTGTTCACATAAT-----TTTCTTCTGTCCGAA-----GAAATGATTCATCGA-----  
AATAATGAGTCA-----  
CCATTGATATCGACACATCTGAGATCGCCAAATGTTTCAGGAGTTCTCTATTCAATCCTTTTCTTCTTTGTTGCTGG  
ATATCTCGTTTCGTACACATCTTCTTTGTTTCC-----

CGAGCCTATAGTGAGTTACAGACAGAGTTCGAAAAGGTCAAATCTTTGATGATTCCATCATAACATGATTGAGTTGCGAAA  
ACTTCTGGATAGGTATCCTACA-----TCT-----  
GAACTGAATTCTTTC-----  
-----  
TGGTTAAAGAATCTCTTTCTAGTTGCTCTGGAACAATTAGGAGATTCTCTAGAAGAAATACGGGGTTCTGCTTTTGGCGG  
CAACATGCTATGGGGTGGTGGTCCC-----  
GCTTATGGGGTCAAATCAATACGTTCTAAGAAGAAATATTTGAATATCAATCTCATCGATATCATCGATCTCATAAGTAT  
CATACCAAATCCCATCAATCGAATCATTTTTTTCGAGAAATACGAGACATCTAAGTCATACAAGTAAAGAGATCTATTTCAT  
TGATAAGA-----AAAAGAAA---  
AACGTGAGC-----GGTGAT-----  
TGGATTGATGAGAAAATAGAATCCTGGGTGCGGAACAGTGATTGATTGATGATAAAGAAAGAGAATTCTTGGTTTCAGTT  
CTCCACC-----TTAACGACAGAAAAAGGATTGATCAAATCTATTGAGTCTGACTCATAGTGATCATTATCA----  
-----  
AAGAATGACTCTGGTTATCAAATGATTGAACAACCGGGACCAATTTACTTACGATACTTAGTTGACATTCAAAAAAGTA  
TCTAATGAATTATGAGTTCAATACATCCTGTTTAGCAGAAAGGCGGATATTCTTGTCTATTATCAGACAATCACTTATT  
CACAAACTTCGTGTGGGGCTAATAGTTTTTCATTTCCCCTCT---  
CGTGGAAAACCCTTTTCTCGCTCCGCTTAGCCCTATCTCCCTCT---  
AGGGGTATTTTGTGATAGGTTCTATAGGAACCGGACGATCCTATTTGTTCAAATACCTAGCGACAAAAC---  
TCCTATGTTCTTTTTCATTACAGTATTTCTGAACAAGTTTCTGGATAAC---  
AAGCTTAAAGGTTTTCTTATTGATGATATCGATATTGATGATAGTGACGATATTGATGCTAGTGACGATATTGATGCTAG  
TGACGCTATTGATGATAGTGACGCTATT-----  
Helianthus CAAAATACCGTCTCAATTCATCCTATTTTATTAGATTTCGGGATGT-----  
-----  
GATATGGTTCGGAAGGATGAACCGGATATGGACAGTTCCAACAAGATTTTATTCTTGAACAAAAATCCATTTTTTGTATT  
ATTTTCATCTATTCCATGACCGGAACAGGGGAGGATACACGTTA-----CACCACGATTTT---GAATCA-----  
GAAGATAGATTTCAAGAAATGGCAGATTTATTCCTCTATCAATAACCGAGCCGGATCTGGTGTATCATAAGAGATTTGC  
CTTTTCTATTGATTCC-----  
TATGGATTGGATCCAAAACAATTCTTGAATGGGGTATTCAACTCCAGGTATGAATGGAAAACGACATCTTTATTG-----  
-----  
GTTTTATTTCTATTTTTTATGAAGAGAATGAATCTTTTTATCGAAGGATCAGAAAAATAGGGTCCGGATCTCCTGCGG  
GAATGATTTGGAAGAGCCAAAACCAAAA---  
ATAGTGGTATTTGCTAGCAACAACATAATGGAGGCAGTCAATCAATATAGATTGATCCGAAATCTGATTCAAATCCAA--  
----CATAGCACC-----  
CATAGGTACATAAGAAATGTATTGAATCGATTCTTTTTAATGAATAGATCCGATCGCAACTTCGAATATGGAATTCAA--  
----AGGGATCAAATAAGAAAGGATACTCTGAATCATAGAACTCTAATGAAATATACGATCAACCAACATTTATCGAAT--  
----TTGAAA---  
AAGAGTCAGAAGAGATGGTTCGATCCTCTTATTTTTTTTTATCGAACCGAGAGATCCATGAATCGGGATCCTGATGCATA  
TAGATACAAATGGTCCACTGGGAGCAATAATTTCCAGGAACATTTGGAACATTTCTGTTTCTGAGCAGAAGAGCCGTTG--  
-----CAAGTA-----GTGTTTCGAT-----  
-----CGA-----TTACGTATTAAT-----  
CCATATTCGATTGATTGGTCTGAGGTTATCGACAAAAAGAT-----  
-----TTGTCTAAGCCACTTCGTTTCTTTTTGTCC---AAGTTGCTTCTT---  
TTTTTGTCTAACTCACT-----  
-----CCT---TTTTTGTGTTGTCAGTTTCGGGAATATCCCC---  
ATTCATAGGTCCGAGATCTACATCTATCAA---TTGAAAGGTCCGAACGATCCA-----  
CAGTTTTTGAATCAATAGGTCTTCAAATCGTTTCAATTTGAAAAAATTGAAACCCTTCTTATTG-----  
GATGATCATGAGACTTGCCAAAAATCGAAATCTTGTATCAATGGAGGAACAATATCACCATTTTTGTTCAATAAGATACC  
A---AAGTGGATG---ATTGACTCATTCCATACTAGAAATAATCGCAGGAAATCCTTTGATAACACGGATTCC---  
TATTTCTCAATGATATTCCACGATCAATACAATTGGCTGAATCCCGTGAAATCATTTCATAGAAGTTTCATTGAGATCTTC  
TTTTTATAAAGGAAATCAACTTCGATTCTTGAATAATCCACATCACTTCTGCTTCTATTGTAACAAAAGATTCCCCTTTT  
ATGTG-----GAAAAGGCCCGTATCAATAATTATGATTTTACG-----TATGGACAATTCCTCAAT-----  
-----ATCTTGTTCATTTCGCAACAAAATATTTTCTTTGTGCGTCCGT-----  
AAAAAAAACATGCTTTTTTG---GGGAGAGATACTATTTCA-----  
GCAATCGAGTCACAGGTATCTAACATATTCATACCT-----AAGGCTTTT-----  
CCACAAAGT---GGTGACGAAACGTATAACTTG-----  
TACAAATCTTTCCATTTTCCAAGTCGATCTAATCCATTTCGTTCTG-----

AGAGCTATTTACTCGATCGCAGACATTTCTGGAACACCTCTAACAGAGGGACAAATAGTCAATTTTGAAAGAACTTATTG  
TCAACCTCTTTCA-----GATATGAATCTATCTGATTGAGAAGGGGAAGAACTTGTAT---CAGTATCTCAAT-----  
TTCAATTCAAACATGGGTTTGATTACACTCCATGTTCTGAGAAATATTTACCATCCGAAAAGAGG-----

-----  
-----  
AAAAAACGG-----AGTCTTTGT-----  
CTAAAG-----AAATGCGTTGAGAAAGGGCAG-----ATGTATAGAACTTTTCAA---  
CGAGATAGTGCTTATTCAACTCTCTCAAAATGGAAT---CTATTCCAAACATAT---  
ATGCCATGGTTCCTTACTTCGACAGGGTACAGATATCTAAAGTTTTTATTTTTAGATACTTTT---TCAGAC---  
CTATTGCCGATA---CTA-----

-----  
-----  
-----AGT-----AGCAGC-----CAAAAATTTGTATCCATTTTT---  
-----CATGATATTATGCATGGATCAGATATATCATGGCGAATTCTTCAGAAAAAA-----  
TTCTGT-----CTTCCACAA-----  
TGGAATCTGATA-----AGTGAGATT-----  
TCGAGTAAGTGTTCATAAT-----CTTCTTCTGTCCGAA-----GAAATGATTCATCGA-----  
AATAATGAGTCA-----CCATTGATATCGACACATCTG-----  
ACAAATGTTCCGGGAGTTCCTCTATGCAATCCTTTTCTTCTTCTTGTGCTGCATATCTCGTTTGTACACATCTTCTCTT  
TGTTTTC-----  
GGGGCCTCTAGTGAGTTACAGGCAGAGTTTGAAGAGTCAAATCTTTGATGATTCCATCATCTATGATTGAGTTGCGAAA  
AATTCTGGATAGGTATCCTACA-----TCT-----  
GAACCGAATTCTTTC-----

-----  
-----  
-----TGGTTAAAGAATCTCTTTCTAGTTGCTTTGAAACAATTAGGAGATTCTCTA-----  
-----GGTGGCAACATGCTATTGGGTGGTGGTCCC-----  
GCTTATGGGGTCAAATCAATACGCTCTAAGAAGAAATATTTGAATATCAATCTCATCGATATCATCGATCTCATAAGTAT  
CATAACAAATCCCATCAATCGAATCACTTTTTCGAGAAATACGAGACATCTAAGTCATAACAAGTAAAGAGATCTATTTCAT  
TGATAAGA-----AAAAGAAAA---  
AACGTGAAC-----GGGGAC-----  
TGGATTGATGATAAAATAGAATCCTGGGTTGCAAACAGTGATTGATTGATGATGAAAAAGAGAATTCTTGGTTCAGTT  
CTCCACC-----TTAACGACAGAAAAAGGATTGATCAAATTTTATTGAGTCTGACTCATAGTGATCATTATCA----

-----  
-----  
AAGAATGACTCTGGTTATCAAATGATTGAACAACCGGGAGCAATTTACTTACGAGACTTAGTTGACATTCATAAAAAGTA  
TCTAATGAATTATGAGTTCAATACATCCTCTTTAGCAGAAAGACGGATATTCCTTGCTCATTATCAGACAATCACTTATT  
CACAAACTTCGTGTGGGGCTAATAGTTTTTCATTTCCCATCT---  
CATGGAAAACCTTTTTCGCTCCGCTTGGCCTTATCTCTCT---  
AGGGGTATTTTAGTGATAGTTCTATAGGAACTGGACGATCTTATTTGGTCAAATACCTAGCGAAAAAC---  
TCCTATCTTCTTTTCATTACGGTATTTCTGAACAAGTTCTGGATAAC---  
AAGTCTCAAGGTTTTGATGATATCGATATTGACGATCTTGATGCTAGTGACGATCTTGATGCTAGTGACGATCTTGATGC  
TAGTGACGATCTTGATGCTAGTGACGATATC-----

Illicium

Jasminum CAAAATACTGTCTCAATTCATCCTATTTTCATCCGATCCGGGGTGT-----  
-----  
GATAGGGTTCCGAAGGATGAATCGGATATGGACAGTTCCAATAAGATTTTATTCTTGAACAAAAATCCATTT-----  
-----TCA-----  
GAAGAGAGATTTCAAGAAATGGCAAATCGATTCACTCTATCAATAACCGAGCCGGATCTGGTCTATCCTAAGGGATCTCG  
CTTTTGT-----  
-----  
---AATGAATCTATTTATCGAAGGATCATAAAAAAATGGGTCCCG-----  
CGCGGGAATGTTTTGGAAAATCTAAAACGAACACAAATAGTGGTATTTGTTAGCAACAACATAATGGAGGCAGTCAATCA  
ATATAGATTGATCCGAAATCTGATTCAAATCCAA-----TATAGTACC-----  
TATGGGTACATAAGAAATGTATTGAATCGATTCTTTTTAATGAATCGATCCGATCGCAACTTCGAATATGGAATTCAA--

-----  
AGGGATCAAATAGGAAAGGGTACTCTGAATCATAGAACTCTAATGAAATATATGATCAACCAACATTTATCGAATTTTTT  
TTTGAAA---AAGAGTCCG-----TTCGATTCTCTTATCGTGATT-----  
GAGAAATCCAAGAATCGGGATCCTTTTGCATATAGATACAAATGGTCCAATGGGAGCAAGAATTTCCAGGAACATTTGGA  
ACATTTCTTTTCTGAGCAGAAGAGCCGTTTG-----GAAATA-----GCGTTTCGAT-----  
-----CAA-----TTCCAAAGGAAT-----TATGAT-----  
-----AAGCCACTT-----  
-----CCTTTCTGTTAGAATCA-----  
-----  
ATAGCATCAATAGGTCTTCAAATTGTTCAATTTGAAAAAATGGAAACCCTTCTTATTG-----  
GATGATCATGATACTTCCCGAAAG-----  
-----ATG---ATTGACTCATTCCATACTAGAAATAATCGCAGGAAATCCTTTGAGAAGACGGATTCC---  
TATTTCTCAATGATATTCGACAATCAAGACAATTGGCTGAATCCCGTGAAACCATTTTCATAGAAGTTCATTGATATCCTC  
TTTTTTTAAAGCAAATCGACTTCGATTCTGGAATAATCCACATCACTTCTGCTTCTATTCTAACACAAGATTCCCCTTTT  
CTGTG-----GAAAAGGCCCGTATCTCGAATTATGATTTTACG-----TATGGACAATTCCTCAAT-----  
-----ATCTTGTTTCATTTCGCAACAAAATATTTTCTTTGTGCGTCCGT-----  
AAAAAAAACATGCTTTTGGG---GGGAGAGATACTATTTCA-----  
CCAATCGAGTCACAGGTATCTAACATATTCATACCT-----AACTATTTT-----CCA--  
-----  
--AGT-----  
AGAACTATTTACTCGATCGCAGACATTTCTGGAACACCTCTAACAGAGGAAGAAATAGTCAATTTGGAAAGAACTTATTG  
TCAACCTCTTTTCAGTTTCAGATAGGAATCTATCTGATTGAGAAGGGAAGAACTTGAAT---CAGTATCTCAAT-----  
TTCAATTCAGCATGCGTTTGATTCCCCTGAG-----AAAGATTTCCCATGGAAAAAACC-----  
-----  
GAAAAGAGGAAAAAACGGAGTCAAAGAGGAAAAAACAGAGTCCTTGTCTTCTTGTCTTCTTTGTCTATGT-----  
CTAAAG-----AAAGGCGTTGAGAAAGGGGAG-----ATGGATAGA-----  
AGAGATAGTGCTTTTTTCAATTTCTCTCAGATTGGAAGGATCTATTCCAAACATAT---  
ATGCCATGGTTCTTACTTCGACAGGGTACAAACATCTAAATGGGATATTTTTAGAGCCTTTT---TCAGAC---  
CTATTGCCGATA---  
CTAACTAGCAGTCTAAGTAGCTGTCTAAGTAGCAGTCTAAGTAGCAGTCTAAGTAGCAGTCTAAGTAGCAGTCTAAGTAG  
CTTAAGTAGCAGTCTAAGTAGCAGTCTAAGTAGCAGTCTAAGTAGCAGTCTAAGTAGCAGTCTAAGTAGCAGTCTAAGTA  
GCAGTCTTAGTAGCAGTCTAAGT-----AGCAGT-----CTAAAATTTGTATCCACTTTT-----  
-----CATGATAGTATGCATGAAGTAGGTATATCATGGCAAATTTCTTCAGATAGAATTGCAATTGCGT-----  
CTTTTCCATCTTTCCATTGGAAATGGGCTTTCCAATTCCAATGGGATCGGCTAAATAAGATTTTGAATTGGATAAATTG  
GATAAGTGAGATT-----  
TCTAGGAAGTGTATGTATAGT-----CGTCTTCTGCTCGAAGCCACAGGAATGATTCATGGA-----  
AAAAATGAGTCA-----  
CCTTTGATACCGACACATCTGAGATCGGTAAATGTTCCGGGAGCTCCTCTATTCAATCCTTTTCTTCTTCTTCTTGTGCTGG  
ATATCTCGTTTCATACACATCTTGTCTTTGTTTCC-----  
CGGGCCTTTAGTGAGTTACAGACAGAGTTCAAAAAGCTCAAACCTTTTCTGATTCCATCATCTAGGATGGAGTTGGAAGA  
ACTTCTGGATGCGTATCCTACA-----TCT-----  
GAACCGAATCCTTTT-----  
-----  
-----GAATTTGAATTG-----  
-----  
GTCAAATCAATACGTTCTAAGAAGAAATATTGGAATATCAATCTC-----ATCGATTTT-----  
ATACCCCATCGAATCACT-----  
CTTTTCGAGAAAAATGAGCCATCTAAGTCATACAAGTAAAGAGCTCTATTCTATTGATAAGA-----  
-----AAAAGAGAA---AACGTGAACATAAAAAACGCGAACGAGGAT-----  
--GGG-----  
AAAATCGATTCTGGGTCGTGAACAGTGATTTGTTTGTGAGGAAGAATTTCTTTCATCTTCTCTACGACAGAACGTTTCAT  
GTTAACGACAAAAAAAAGCATTGATCCAATTCTATGGAGTTTGACTCATAGTGATCATTTTATCA---  
ACTCATTTTATCAAAGAATGACTCTGGTTATCAAATGATTGAACAACCGGGAGCAATTTACTTACGATACTTAGTTGACAT  
TCATAAAAAGTCTCTATGGAATTATGAGTTCAATACATCCTGTTTAGCAGAAAAACGGGTCTTCTTGTCTCATTATCAGA



CAATCACTTATTCCCAAACCTTCGTGTGGGACTAATACTTTTCATTTCCCATCT---  
CATGGAAAACCCTTTTTCGCTCCGCTTA---TTATCCCCCTCT---  
AGGGGGGTTTTAGTGATAGGTTCTATAGGAACTGGACGATCCTATTTGGTCAAACATCTAGCGACAAAC---  
TCCCATCTTCCTTTTCATTAGGTTAGCTGTGAGCGAGCTCCTGAATAAC---AATCCTAAA-----  
TTTTCGTTGGATTGAGCCGGAGGACTCTTGGCCTGTTTTTGACGATTTGTTGGAGCATAGTGCCTACTATGAGAATCGAGT  
AGGTGATGGTAGGGACTATATTATTGATACTATTGATGCTAG  
Lactuca CAAAATACCGTCTCAATTCATCTATTTTCATCAGATTCGGGATGT-----  
-----  
GATATGGTTCCGAAGGATGAACCGGATATGGACAGTTCCAACAAGATTTTCATTCTTGAACAAAAATCCATTTTTTTGATTT  
ATTTTCATCTATTTCCATGACCGGAACAGGGGAGGATACACGTTA-----CACCACGATTTT---GAATCA-----  
GAAGAGAGATTTCAAGAACTGGCAGATTTATTCATCTATCAATAACCGAGCCGGATCTGGTGTATCATAAGAGATTTGC  
CTTTTCTATTGATTC-----  
TATGGATTGGATCCAAAACAATTCTTGAATGGGGTATTCAACTCCAGGTATGAATGGAAAACGACATCTTTATTGGTTTT  
ATTGGTTCTACTTCTATTTTTTTATGAAGAGAATGAATCTTTTTTATCGAAGGATCAGAAAAAAAGGGTCCGGATCTCCT  
GCGGGAATGATTTGGAAGAGCCAAAACCAAAA---  
ATAGTGGTATTTGCTAGCAACAACATAATGGAGGCAGCCAATCAATATAGATTGATCCGAAATCTGATTCAAATCCAA--  
----CATAGCACC-----  
CATAGGTACATAAGAAATGTATTGAATCGATTCTTTTTAATGAATAGATCCGATCGCAACTTCAAATATGGAATTCAA--  
----AGGGATCAAATAGGAAAGGATACTCTGAATCATAGAACTCTAATGAAATATATGATCAACCAACATTTATCGAAT-  
-----TTGAAA---  
AAGAGTCAGAAGAGATGGTTTGATCCTCTTATTTTTTTTTCTCGAACCAAGAGATCCATGAATCGGGATCCTGATGCATA  
TAGATACAAATGGTCCACTGGGAGCAAGAATTTCCAGGAACAT-----TTCGTTTCTGAGCAGAAGAGCCGTTTT-  
-----CAAGTA-----GTGTTTCGAT-----  
-----CGA-----TTACGTATTAAT-----  
CAATATTCGATTGATTGGTCTGAGGTTATCGACAAAAAAGAT-----  
-----TTGTCTAAGCCACTTCGTTTTCTTTTTGTCC---AAGTTGCTT-----  
-----  
CTTTTTTTGTCTAACTCACTTCCT---TTTTTGTGTCAGTTTCGGGAATATCCCC---  
ATTCATAGGTCCGAGATCTACATCTATGAA---TTGAAAGGTCCGAATGATCCA-----  
CAGTTTTTGAATCAATAGGTCTTCAAATCGTTCAATTTGAAAAAATTGAAACCCTTCTTATTG-----  
GATGATCATGAGACTTGCCAAAAATCTAAATCTTGATCAATGGAGGAACAATATCACCATTTTTGTTCAATAAGATACC  
A---AAGTGGATG---ATTGACTCATTCCATACTAGAAATAATCGCAGGAAATCCTTTGATAACACGGATTCC---  
TATTTCTCAATGATATTCCACGATCAATACAATTGGCTGAATCCCGTGAAATCATTTCATAGAAGTTCATTGAGATCTTC  
TTTTTATAAAGCAAATCAACTTCGATTCTTGAATAATCCACATCACTTCTGCTTCTATTGTAACAAAAGATTCCCCTTTT  
ATGTG-----GAAAAGGCCCGTATCAATAATTATGATTTTACG-----TATGGACAATTCCTCAAT-----  
-----ATCTTGTTTCATTTCGCAACAAAATATTTTCTTTGTGCGTCCGT-----  
AAAAAAAACATGCTTTTTTG---GGGAGAGATACTATTTCA-----  
GCAATCGAGTCACAGGTATCTAACATATTCATACCT-----AAGGCTTTT-----  
CCACAAAGT---GGTGACGAAACGTATAACTTG-----  
TACAAATCTTTCCATTTTCCAAGTCGATCCAATCCATTTCGTTTCGT-----  
AGAGCTATTTACTCGATCGCAGACATTTCTGGAACACCTCTAACAGAGGGACAAATAGTCAATTTTGAAAGAACTTATTG  
TCAACCTCTTTCA-----GATATGAATCTATCTGATTGAGAAGGGAAGAAGTGTAT---CAGTATCTCAAT-----  
TTCAATTCAAACATGGGTTTATTGATTACACTCCATGTTATGAGAAATATTTACCATCCGAAAAGAGG-----  
-----  
AAAAAACGG-----AGTCTTTGT-----  
CTAAAG-----AAATGCGTTGAGAAAGGGCAG-----ATGTATAGAACTTTTCAA---  
CGAGATAGTGCTTATTCAACTCTCTCAAATGGAAT---CTATTCCAAACATAT---  
ATGCCATGGTTCTTACTTCGACAGGGTACAGATATCTAAAGTTTTTATTTTTAGATACTTTT---TCAGAC---  
CTATTGCCGATA---CTA-----  
-----AGT-----AGCAGT-----CAAAAATTTGTATCCATTTTT---  
-----CATGATATTATGCATGGATCAAATATATCATGGCGAATTCTTCAGAAAAAA-----  
TTCTGT-----CTTCCACAA-----  
AGGAATCTGATA-----AGTGAGATT-----  
TCGAGTAAGTGTGTTGCATAAT-----CTTCTTCTGTCCGAA-----GAAATGATTCATCGA-----  
AATAATGAGTCA-----CCATTGATATCGACACATCTG-----

ACAAATGTTTCGGGAGTTCCTCTATGCAATCCTTTTCTTCTTCTTGTGCTGCATATCTCGCTTGTACACGTCTTCTCTT  
TGTTTTT-----  
GGGGCCTCTAGTGAGTTACAGACAGAGTTCGAAAAGGTCAAATCTTTGATGATTCCATCATCTATGATTGAGTTGCGAAA  
ACTTCTGGATAGGTATCCTACA-----TCT-----  
GAACCGAATTCTTTC-----  
-----  
-----TGGTTT-----CTGAAACAATTAGGAGATTCTCTA-----  
-----GGTGGCAACATGCTATTGGGTGGTGGTCCC-----  
GCTTATAGGGTCAAATCAATACGCTCTAAGAAGAAATATTTGAATATAAATCTCATCGATATCATCGATCTCATAAGTAT  
CATACCAAATCCCATCAATCGAATCACTTTTTTCGAGAAATACGAGACATCTAAGTCATACAAGTAAAGAGATCTATTTCAT  
TGATAAGA-----AAAAGAAAA---  
AACGTGAAC-----GGGGAC-----  
TGGATTGATGATAAAATAGAATCCTGGGTTGCAAAACAGCGATTTCGATTGATGATGAAAAAAGAGAATTCTTGGTTTCAGTT  
CTCCACC-----TTAACGACAGAAAAAAGGATTGATCAAATTTTATTGAGTCTGACTCATAGTGATCATTCTCA----  
-----  
AAGAATGACTCTGGTTATCAAATGATTGAACAACCGGGAGCAATTTACTTACGATACTTAGTTGACATTCTATAAAAAGTA  
TCTAATGAATTATGAGTTCAATACATCCTCTTTAGCAGAAAGACGGATATTCCTTGCTCATTATCAGACAATCACTTATT  
CACAAACTTCGTGTGGGGCTAATAGTTTGCATTTCCCATCT---  
CATGGAAAACCTTTTTCGCTCCGCTTAGCCTTATCCCTCTCT---  
AGGGGTACTTTAGTAATAGGTTCTATAGGAAGTGGACGATCTTATTTGGTCAAATACCTAGCGAAAAAC---  
TCCTATCTTCTTTTCATTACGGTATTTCTGAACAAGTCCCTGGATAAC---AAGTCTCAAGGTTTT-----  
GATAATATTGATGTTGATGCTAGTGACGATAGTGATGCTAGTGACGATATTGATGCTAGTGACGATATC-----  
-----  
Liriodendron CAAATACCGTCTCAATTCATCCTATTTTCATCAGATCCGGGATGT-----  
-----  
GATATGGTTCGGAAGGATGAACCGGATATGGGCAGTTCCAATAAGATTTTCATTCTTGAACAAAAATCCATTTTTGGATTT  
ATTTTCATCTATTTCCATGACCGGAACAAAGGGGGATACACGTTA-----CACCACGATTTT---GAATCA-----  
GAAGAGAGATTTCAAGAAATGGCAGATCTATTCATCTATCAATAACCGAGCCGGATCTGGTGTATCATAAGGGATTTGC  
CTTTTCTATTGATTCC-----  
TACGGATTGGATCAAAAAAATTCTTGAATGAGGTATTCAACTCCAGGGATGAATCGAAAAAGAAATCTTTATGG-----  
-----  
GTTCTACCTCCTATTTTTGATGAAGAGAATGAATCTTTTTTATCGAAGGATCAGAAAAAATCGGTCCGGATTTCTGCGG  
GAATGATTTGGAAGATCCAAAACCAAAA---  
ATAGTGGTATTTGCTAGCAACAACATAATGGAGGCGGTCAATCAATATAGATTGATCCGAAATCTGATTCAAATCCAA--  
----TATAGCACC-----  
TATGGGTACATAAGAAATGTATCGAATCGATTCTTTTTAATGAATAGATCCGATCGCAACTTCGAATATGGAATTCAA--  
----AGGGATCAAATCGAAATGATACTCTGAATCATCTAACTAGAAATAAATATACGATCAACCAACATTTATCGAAT-  
-----TTGAAA---AAGAGTCAGAAGAAATGGTTTCGATCCTCTTATT-----  
TCTCGAACCGAGAGATCCATGAATCGGGATCCTGATGCATATAGATACAAATGGTCCAATGGGAGCAAGAATTTCCAGGA  
ACATTTGGAACATTTTCGTTTCTGAACAGAAGCACCCTTTT-----CAAGTA-----  
GTGTTTCGAT-----CGA-----TTACGTATTAAT--  
----CAATATTCGATTGATTGGTCCGAGGTTATCGACAAAACAAGAT-----  
-----TTGTCTAAGTCACTTCGTTTCTTTTTGTCC---AAGTCACTTCTC---  
TTTTTGTCCAAGTCACTT-----  
----CTCTTTTTGTCTAAGTCACTTCTCT---TTTTCTTTGTGAGTATCGGGAATATCCCC---  
ATTCATAGGTCGAGATCCACATCTATGAA---  
TTGAAAGTCCCGAATGATCAACTCTGCAATCAGTTGTTAGAATCAATAGGTGTTCAAATCGTTTCATTTGAATAAATTGAA  
ACCTTCTTATTG-----  
GATGATCATGATACTTCCCAAAGATCGAAATCTTGTATCAATGGAGGAACAATATCACCATTTTTGTTCAATAAGATACC  
A---AAGTGGATG---ATTGACTCATTCCATACTAGAAATAATCGCAGGAAATCCTTTGATAACACTGATTCC---  
TATTTCTCAATGATATCCCAGATCGAGACAATTGGCTGAATCCCGTGAACCATTTTCATAGAAGTTCATTGATATCTTC  
TTTTTATAAAGCAAATCGACTTCGATTCTTGAATAATCCACATCACTTCTGGTTCTATTGTAACAAAAGATTCCCTTTTT  
ATGTG-----GAAAAGACCCGATCAATAATTATGATCTTACA-----TATGGACAATTCCTCAAT-----  
-----ATCTTGTTCATTTCGAACAAAATATTTTCTTTGTGCGTCGGT-----  
AAAAAAAACATGTTTTTTTGG---GAGAGAGATAACATTTCA-----  
CCAATCGAGTCACAGGTATCTGACATATTCATACCT-----AACGATTTT-----  
CCACAAAGT---GGTGGCGAAACGTATAACTTG-----

TACAAATCTTTCCATTTTCCAATTCGATCCGATCCATTTCGTTTCGT-----  
AGAGCTATTTACTCGATCGCAGACATTTCTGGAACACCTCTAACAGAGGAACAAATAGTCAATTTTGAAAGAAGCTTATTG  
TCAGCCTCTTTCA-----GATATGAATCTATCTGATTGAGAAGGGAAAAAAGTTGCAT---CAGTATCTCAGT-----  
TTCAATTCAAACATGGGTTTGATTACACTCCATGTTCTGAGAAAGATTTACCATCAGGAAAGAGG-----  
-----  
-----

AAAAAACGG-----AGTCTTTGT-----  
CTAAAG-----AAATGCGTTGAGAAACGGCAG-----ATGTATAGAACCTTTCAA---  
CGAGATAGTGCTTTTTCAAATCTCTCAAAATGGAAT---CTGTTCCAAACATAT---  
ATGCCATGGTTCCTTACTTCGACAGGGTGCAAATATCTAAATTTACCCTTTTAGATACTTTT---TCAGAC---  
CCATTGCCGATA---CTA-----  
-----

-----AGT-----AGCAGT-----CAAAAATTTGTATCCATTTTT---  
-----CATGATATTATGCATGGATCAGATATATCATGGCCAATTCCTCAGAAAAA-----  
TTGTGGGCGATTCTTCCACAA-----  
TGGAAATCTGATA-----AGTGAGATT-----  
TCGAGTAAGTGTTTACAGAAT-----CTTCTTCTGTCCGAA-----GAAATGATTCATCGA-----  
AATAATGAGTCACCCGTTCCATTGATATGGACACATCTGAGATCACCAAATGCTCGGGAGTTTCTCTATTCAATCCTTTT  
CCTTCTTCTTGTGCTGGATATCTCGTTTCGTACACATCTTCTCTTTGTTTCC-----  
CGAGCCTCTAGTGAGTTACAGACAGAGTTAGAAAAGATCAAATCTTTGATGATTCCATCATAACATGATTGAGTTGCGAAA  
ACTTCTGGATAGGTATCCTACA-----TCT-----  
GAACTGAATTCCTTT-----  
-----  
-----

TGGTTAAAGAATCTCTTTCTAGTTGCTCTGGAACAATTAGGAGATTCTCTGGAAGAAATACGGGGTTCTGCTTCTGGCGG  
CAACATGCTATTGGGTGGTGGTCCC-----  
GCTTATGGGGTCAAATCAATACGTTCTAAGAAGAAATATTTGAATATCAATCTC-----  
ATCGATCTCATCAGTATCATACCAAATCCCATCAATCGAATCACTTTTTTCGAGAAATACGAGACATCTAAGTCGTACAAG  
TAAAGAGATCTATTCTATTGATAAGA-----  
AAAAGAAAA---AACGTGAAC-----GGTGAT-----  
TGGATTGATGATAAAAATAGAATCCTGGGTGCGAACAGTGATTTCGATTGATGATGAAGAAAGAGAATTTTGGTTTCAGTT  
CTCCACC-----TTAACGACAGAAAAAGGATTGATCAAATCTATTGAGTCTGACTCATAGTGATCATTATCA-----  
-----  
-----

AAGAATGACTCTGGTTATCAAATGATTGAACAACCGGGATCAATTTACTTACGATACTTAGTTGACATTCATAAAAAATA  
TCTAATGAATTATGAGTTCAATAGATCCTGTTTAGCAGAAAGACGGATATTCCTTGCTCATTATCAGACAATCACTTATT  
CACAAACCTCGTGTGGGGCTAATAGTTCTCATTTCCTATCT---  
CATGGAACACCTTTTTCGCTCCGCTTAGCCCTATCCCCTTCT---  
AGGGGTATTTTAGTGATAGGTTCTATAGGAATTGGACGATCATATTTGGTCAAATACCTAGCGACAAAAC---  
TCCTATGTTCTTTTATTACGGTATTTCCGAACAAGTTTCTGGATGAC---  
AAGCCTAAAGGTTATCTTATTGACGATATCGATATTGATGATAGTGACGATATCGATATTGATGATAGTGACGATATT---  
-----  
-----

Lotus CAAAATACCGTCTCAATTCATCCTATTTTCATCAGATCCGGTATGT-----  
-----GATATGGTTCCGAAGGATGAACCG-----  
GACAGTTCCAATAAGATGTCATTCTTGAACAAAAAT-----  
GGTTTATTTTCATCTATTCCATGACCGGAACAGGGGGGTATACACGTTA-----CACCACGATTTT---GAATCA-----  
-----  
-----

GAAGAGATATTTCAAGAAATGGCAGATCTATTCAATCTATCAATAACTGAGCCGGATCTGGTGTATCATAAGGGATTGCG  
CTTTTCTATTGATTCC-----  
TCCGGATTGGATCAAAAACAATTTTTGAATGAGGTATTCAACTCAAGGGATGAATCGAAAAAGAAATCTTTATTG-----  
-----  
-----

GTTCTACCTACTCTTTTTTATGAAGAGAATGAATCTTTTTATCGAAGGATCATAAAAAAATGGGTCCAGACCTCTTGCGG  
GAATGATTTGGAAGATCCAAAACCAAAA---  
ATAGTGGTATTTACTAGCAACAACATAATGGAGGCAGTCAATCAATATAGATTGATCCGAAATCTTATTCCAATCCAA---  
-----  
-----

TATATCACCTATGGGTATGGGTACATAAGAAATGTATTGAATCGATTTCATTCAAAGAATCGATTTCGATCGCAACTTCGA  
ATATCGAATTCAA-----  
AGGTATCAAATAGAGAATGATACTCTGAATCATAGAAGTGAATGAAATACACGATCAACCAACATTTCTCAAAT-----  
-----  
-----

-  
TTAAAAAAGAGTCAGAAGAAATGGTTCGATTCTCTTATTTTGGATTTCTCGAACCGAGAGATCCATGAATCGGGATCC  
TAATGCATATAGATACAAATGGTCCAATGGGAACAAGAATTTCCAGGAACATTTGGACCATTTTCTTCTGAGCAGAATA  
GCCGTTTT-----CAAGTA-----GTGTTTCGAT-----  
-----CGA-----TTACGTATTAAT-----  
CAATATTCGATTGATTGGTCTGAGGTTATCGACAAAAAGAT-----  
-----TTGTCTAAGTCACTTTGTTTCTTTTTGTAC---AAGTTTCTTCTC---  
TTTTTTTCCAAGTTTCTT-----  
----CTCTTTTTGTCTAAATCACTTCT--TTTTCTTTGTGAGTTTCGGGAGTATCCCC---  
ATTCATAGGTCCGAGATCCACATCTATGAA---  
TTGAAAAGTCCGAATCATCCACTCTGTAATCAGCTGTTTCGAATCAATAGGTCTTCAAATCGTTTCATTTGAAAAATGGAA  
ACCTTCTTATTA-----  
GATGACCATGATACTTCCCAAAAATCGAGATTCTTGATCAATGGAGGAACAATATCACCATTTTTGTTCAATAAGATACC  
T---AAGTGGATG---ATTGACTCTTTGATACTATAAAGAATCGTAGAAAATTTTTGATAACACGGATTCC---  
TATTTCTCAATGATATCCCACGATGAAGATAATTGGCTGAATCCCGTGAAACCATTTTATAGAAGTTCATTGATATCCTC  
TTTTTATAAAGCAAATCGACTTTCGATTCTTGAATAATCGATATCACTTCTGCTTCTATTGTAACAAAAGATTGCCTTTTT  
ATGTG-----GAAAAGGCCTGTATCAATAATTATGATTTTACG-----TATGGACAATTCCTCAAT-----  
-----ATCTTGTTCATTTCGCAACAAAAGATTTTCTTTGTGCGGCGGT-----  
AAAAAAAACATGCTTTTTTTG---GAGAGAGATACTATTTCA-----  
CCAATCGAGTCACGGGTATTTAACATATTGATACTT-----AACGATTTT-----  
CCGCAAAGT---GGTACGAAGGGTATAAATTG-----  
TACAAATCTTTCCATTTTCCAATTCGATCCGATCCATTTCGTTTCAT-----  
AGAGCTATTTACTCGATCGCAGACATTTCTGTAACACCTCTAACAGAGGGGCAAATAGTCAATTTGAAAGAACTTATTG  
TCAACCTCTTTCA-----GATATGAATCTACCCGATTTCAGAAGGGAAGAAGTTCAT---CAGTATCTCAA-----  
TTCAATTCAAACATGGGTTTGATTTCATATTCATGTTCTGAGAAATATTTACCATCCGAAAATAGG-----  
-----  
AAAAAAGGG-----ATTCCTTGT-----  
CTAAAA---AAATGCCTTGAGAAAGGGCAG-----ATGTATAGAACCTTTCAA---  
CGAGATAGTGTTTTTTCAACTCTATCAAAATGGAAT---CTATTCCAAACATAT---  
ATACCTTGGTTCCTTACTTCGACAGGGTACAAATATCTAAATTTTCATATTTTTAGATACTTTT---TCAGAC---  
CTATTGCCGATA---CTA-----  
-----AGT-----AGCAGC-----CAAAAATTTGTATCCATTTTT---  
-----CATGATATTATGCATAGATCAGATATATCATGGCGAATTCTTCAGAAAAA-----  
TGGTGT-----CTTTCACAA-----  
TGGAATCTGATA-----AGTGAGATT-----  
TCGAGTAAGTGTTCATAAT-----CTTCTTCTGTCCGAA-----GAAATTATTCATCGA-----  
AATAATGAGTCA-----  
CCATTGATATCGACACATCTGAGATCGCTAAATGTTTCGGGAGTTTCTTCTATTCAATCCTTTTCTTCTTCTTGTGCTGG  
ATATCTCGTTTCGTACACATCTTCTCTTTGTTTCT-----  
CGAGTCTATAGTGAGTTACAGACAGAGTTCGAAAAGGTCAAATCTTTGATGATTCCATCATAACATGATTGAGTTGCGAAA  
ACTTCTGGATAGGTATCCTACA-----TCT-----  
GAACAGAATTTCTTT-----  
-----  
TGGTTAAAGAATCTCTTTCTAGTTACTCTGGAACAATTAGGAAATTTCTCTAGAAGAAATACGAAGTTCTGCTTCTGGCGG  
CAACATGCTATGGGGTGGTGGTTCC-----GCTTATGGGGTCAAATCAATACGTTCTAAGAAGAAATATTTG-----  
AATCTC-----  
ATCGATCTCATAAGTATCATACCAAATCCCATCAATCGAATCGCTTTTTTCGAGAAATATGAGACATCTAAGTCATAACAAG  
TAAAGCGATCTATTTCATTGATAAGA-----  
AAAATAAAA---AACGTGAAT-----GGTGAT-----  
TGGATTGATGATAAAAATAGAATCCTGGGTCTCGAACAGTGATTTCGATTGATGATAAAGAAAGAGAATTCTTGGTTTCAGTT  
CTCTACC-----TTAACGACAGAGAAAAGGATTGATCAAATTTCTATTGAGTCTGACTCACAGTGATCATTTATCA----  
-----  
AAGAATAACTCTGGTTATCAAATGATTGAACAACCGGGAACAATTTACTTACGATACTTAGTTGACATTCAGAAAAAGTA  
TCTAATGAATTATGAGTTCAATACATCCTGTTTAGTAGAAAAACGGATATTCCTTGCTCATTATCAGACAATCACTTATT

CACAAACCTGTGTGGGACTAATAGTTTTTCATTTCTCGTCT---  
CATGGGAAACCCTTTTCGCTCCGCTTAGCCCTATCCCCCCT---  
AGGGGTCTTTTAGTGATAGGTTCTATAGGAACTGGACGATCCTATTTGGTCAAATACCTAGCTGCAAAC---  
TCCTATGTTCCCTTTCATTAGAGTATTTCTGAACAAGTTCCTGGATAAC---  
AAGCCTAAGGGTTTTCTTATTGATGATAGTGAC-----  
GATATTGACGATATTGATGATAGTCACGATATTGACGATATTGATGATAGTAATGATAGTGACGATATC-----  
-----

Morus CAAAATACCGTCTCAATTCATCCTATTTTCATCAGATCCGGGATGT-----

-----  
GATATGGTTCGAAGGATGAACCTGGATATGGACAGTTCCAATAAGATTTTCATTCTTGAACAAAAATCCATTTTTTTGATTT  
ATTTTCATCTATTCCATGACCGGAACAGGGGGGATAACACGTTA-----CACCACGATTTT---GAATCA-----  
GAAGAGAGATTTCAAGAAATGGCAGATCTATTTCACTCTATCAATAACCGAGCCGGATCTGGTGTATCATAAGGGATTTGC  
CCTTTCTATTGATTCC-----  
TACAGATTGGATCAAAAACAATTCTTGAATGAGGTATTCAACTCCAGGGATGAATCGAAAAAGAAATCTTTATTG-----  
-----

GTTCTACCTCCTATTTTTTATGAAGAAAATGAATCTTTTTATCGAAGGATCAGAAAAAATGGGTCCGGACCTCCTGCGG  
GAATGATTTGGAAGATCCAAAACCAAAA---  
ATAGTCGTATTTGCTAGCAACAACATAATGGAGGCAGTCAATCAATATAGATTGATCCGAAATCTGATTCAAATCCAA--  
----TATAGCACC-----  
TATGGGTACATAAGAAATGTATTGAATCGATTCCTTTTAATGAATAGATCCGATCGCAACTTCGAATATGGAATTCAA--  
----AGGGATCAAATAGGAAATGATACTCTGAATCATAGAACTATAATGAAATATACGATCAACCAACATTTATCAAAT-  
-----TTGAAA---

AAGAGTCAGAAGAAATGGTTCGATCCTCTTATTTTTATTTCTCGAACCGAGAGATCCATGAATCGGGATCCTAATGCATA  
TAGATACAAATGGTCCAATGGGAGCAAGAATTTACAGGAACATTTGGAACATTTTCATTTCTGAGCAGAAGAGCCGTTTT-  
-----CAAGTA-----GTGTTTCGAT-----  
-----CGA-----TTACGTATTAAT-----  
CAATATTCGATTGATTGGTCTGAGGTTATCGACAAAAAAGAT-----

-----TTGTCTAAGTCACTTCCTTTCTTTTTGTCC---AAGTTACTTCTT---  
TTTTTGTCCAAGTTTTCTT-----  
----CTTTTTTGTCTAACTCACTTCCT---TTTTTCTTTGTGAGTTTCGGGAATATCCCC---  
ATTCATAGGTTCAGAGATCCACATCTATGAA---  
TTGAAAGGCCCGAATGATCAACTCTGCAATCAGTTGTTAGAATCAATAGGTCTTCAAATCGTTCATTTGAAAAAATTGAA  
ACCCTTCTTATTG-----  
GATGATCATGATACTTCCCAAAAATCGAAATTTCTTGATCAATGGAGGAACAATATCACCATTTTTGTTCATAAAGATAACC  
A---AAGTGGATG---ATTGACTCATTCCATACTAGAAAGAATCGCAGGAAATCTTTTGATAACACAGATTCC---

TATTTCTCAATGATATCCCACGATCAAGACAATTGGCTGAATCCCGTGAAACCATTTTCATAGAAGCTCATTGATATCCTC  
TTTTTATAAAGCAAATCGACTTCGATTCTTGAATAATCCACATCACTTCTGCTTCTATTGTAACAAAAGATTCCCTTTTT  
ATGTG-----GAAAAGGCCCGTATCAATAATTATGATTTTACG-----TATGGACAATTCCTCAAT-----  
-----ATCTTGTTTCATTTCGCAACAAAATATTTTCTTTGCGCGGCGGT-----  
AAAAAAAATATGCTTTTTTTG---GAGAGAGATACTATTTCA-----  
CCAATCGAGTTACAGGTGTCTAACATATTCATACCT-----AACGATTTT-----  
CCACAAAAT---GGTGACGAAAGGTATAACTTT-----  
TACAAATCTTTCCATTTTCCAATTTCGATCCGATCCATTTCGTTTCGT-----

AGAGCTATTTACTCGATCGCAGACATTTCTGGAACACTTCTAACAGAGGGACAAATAGTCAATTTTGAAAGAACTTATTG  
TCAACCTCTTTCA-----GATATGAATCTGTCTGATTGAGAAGGGAAGAAGCTTGCAT---CAGTATCTCAAT-----  
TTCAATTCAAACATGGGTTTGATTACACTCCATGTTCTGAGAAATATTTACCATCCGAAAAGAGG-----  
-----  
-----

AAAAAACGG-----GGTCTTTGT-----  
CTAAAG-----AAATGCCTTGAGAAAGGGCAG-----ATGTATAGAACCCTTTCAA---  
CGAGATAGTGCTTTTTCAACTCTCTCAAAATGGAAT---ATATTCCAAACATAT---  
ATGCCATGGTTCCTTACTTCGACAGGATACAACCTATCTAAATTTGCTATTTTTAGATACTTTTT---TCAGAC---  
CTATTGCCGATA---CTA-----  
-----

-----AGT-----AGCAGC-----CAAAAATTTGTATCCATTTTT---  
-----CATGATATTATGCATGGATTAGATATATCATGGCGAATTTCTTCAGAAAAGA-----  
TTGTGT-----CTTCCACAA-----

TGGAATCTGATA-----AGTGAGATT-----  
TCGAGTAAGTGTTCACATAAT-----CTTCTTCTGTCCAAA-----GAAATGATTCATCGA-----  
AATAATGAGTCA-----  
CCATTGATATCGACACATCTGAGATCGCCAAATGTTCCGGGAGTTCCCTCTATTCAATCCTTTTCTTCTTCTTGTGCTGG  
ATATCTCGTTTCGTACACATCTTCTTTTTGTTTCT-----  
CGAACCTATAGTGAGTTACAGACAGAGTTCGAAAGGGTCAAATCTTTGATGATTCCATCATAACATGATTGAGTTGCGAAA  
ACTTCTGGATAGGTATCCTACA-----TCT-----  
GAACTGAATTCTTTC-----

-----  
TGGTTAAAGAATCTCTTTCTAGTTGCTCGAGAACAATTAGGAGATTCTCTAGAAGAAATACGGGGTTCTGCTTCTGGCGG  
CAACATGCTATGGGGTGGCGGTCCC-----  
ACTTATGGGGTCAAATCAATACGTTCTAAGAAGAAATATTTGAATATCAATCTCATCGATATCATCGATTTTCATAAGTAT  
CATACCAAATCCCATCAATCGAATCGCTTTTTCCAGAAATACGAGACATCTAAGTCATATAAGTAAAGAGACCTATTTCAT  
TGATAAGA-----AAAAGAAA---  
AAGGTGAAC-----GGTGAT-----  
TGGATTGATGATAAAATAGAATCCTGGGTCTCGAACAGTGATTCCGGTTGATGATAAAGAAAGAGAATTCTTGGTTCAGTT  
CTCCACC-----TTAACGACAGAAAAAGGATTGATCAAATCTATTGAGTCTGACTCAGAGTGATCATTATCA-----  
-----

AAGAATGACTCTGGTTATCAAATGATTGAACAACCGGGAGCAATTTACTTACGATACTTAGTTGACATTCATAAAAAGTA  
TCTAATGAATTATGAGTTCAATACATCCTGTTTAGCAGAAAGACGGATATTCCTTGCTCATTATCAGACAATCACTTATT  
CACAAACCTCCTGTGGGGCTAATAGTTTTTCATTTCCCATCT---  
CATGGAAAACCTTTTTCGCTCCGCTTAGCCCTATCCCTCTCT---  
AGGGGTATTTTAGTGATAGGTTCTATAGGAACTGGACGATCCTATTTGGTCAAATACCTAGCGACAAAAC---  
TCCTATGTTCTTTTATTACAGTATTTCTGAACAAGTTTCTGGATAAC-----  
AAGCCTAAGGGTTTTCTT---ATTGATGATAGTGACGATATTGATGATAGTGACGATATC-----  
-----

Nandina CAAAATACCGTCTCAATTCATCCTATTTTCATCAGATCCGGGATGT-----  
-----

GATATGGTTCCGAAGGATGAACCGGATATGGACAGTTCCAATAAGATTTTATTCTTGAACCAAAAATGATTTATTT-----  
-----CATGACCGGAACAGGGGAGGATACACGTTG-----CACCACGATTTT---GAATCA-----  
GAAGAGAGATTTCAAGAAATGGCAGATCTATTAACCTATCAATAACCGAGCCGGATCTGGTGTATCATAAGGGATTTGC  
CTTTTCTATTGATTCC-----  
TACGGATTGGATCAAAAAAATTCTTGAATGAGGTATTCAACTCCAGGGATGAATCGAAAAAGAAATCTTTATTG-----  
-----

GTTCTACCTCCTATTTTTTATGAAGAGAATGAATCTTTTTATCGAAGGATCAGAAAAAATGGGTCCGGATCTCCTGCGG  
GAATGCTTTGGAAGATCCAAAACCAAAA---  
AGAGTGGTATTTGCTAGCAACAACATAATGAAGGCAGTCAATCAATATAGATTGATCCAAAATCTGATTCAAATCCAA--  
----TATAGCAT-----

CATGGGTACATAAGAAATGTATCGAATCAATCTTTTTAATGAATAGACCCGATCGCAACTTCGAATATGGAATTCAA--  
----AGGGATCAAATAGGAAATGATACTCTGAATCATAGAACTATAATGAAATATACGATCAACCAACATTTATCGAAT-  
-----TTGAAA---AAGAGTCAGAAGAAATGGTTCGATCCTCTTATT-----  
TCTCGAACCGAGAGATCCATGAATCGGGATCCTGATGCATATAGATACAAATGGTCCAATGGGAGCAAGAATTTCCAGGA  
ACATTTGGAACATTTCTGTTTCTGAGCAGAAGAGCCGTTTT-----CAAGTA-----  
GTGTTTCGAT-----CGA-----TTACGTATTAAT--  
----CAATATTCGATTGATTGGTCCGAGGTTATCGACAAACAAGAT-----  
-----CTTTCTAAGTCACTTCGTTTCTTTTTGTCC---AAGTTGCTTCTC---

TTTTTGTCCAAGTTGCTT-----  
----CTTTTTTGTCTAAGTCACTTCTCT---TTTTTCTTTGTGAGTATCGGGAATATCCCC---  
ATTCATAGGTCCGAGATCCACATCTATGAA---  
TTGAAAGGTCCGAATGATCAACTCTGCAATCAGTTGTTAGAATCAATAGGTGTTCAAATCGTTTCAATTTGAATAAATTGAA  
ACCCTTCTTATTG-----

GATGATCATGATACTTCCCAAAAATCGAAATTATTGATCAATGGAGGAACAATATCACCATTTTTGTTCAATAAGATAACC  
A---AAGTGGATG---ATTGACTCATTCCATACTAGAAAAAATCGCAGGAAATCCCTTGATAACACTGATTCC---  
TATTTCTCAATGATATCCCACGATCGAGACAATTGGCTGAATCCCGTGAAACCTTTTCATAGAAGTTTCAATGATATCTTC  
TTTTTATAAAGCAAATCGACTTCGATTCTTGAATAATCCACATCACTTCTGTTTCTATTGTAACAAAAGATTCCCTTTTT  
ATGTG-----GAAAGGGCCCGTATCAATAATTATGATCTTACG-----TACGACAATTCCTCAAT-----

-----ATCTTGTTTCATTTCGCAACAAAATATTTTCTTTGTGCGTCGGT-----  
AAAAAAAAAACATGTTTTTTTTG---GAGAGAGATACT-----  
CCGATCGAGTCACAGGTATCTAACATATTCATACCT-----AACGATTTT-----  
CCACCAAGT---GGTGACGAAACGTATAACTTG-----  
TACAAATCTTTTCATTTTCCAATTCGATCCGCTCCATTTCGTTTCGT-----  
AGAGCTCTTTACTCGATCGCAGACATTTCTGGAACACCTCTAACAGAGGGGACAAATAGTCAATTTTGAAAGAAGCTTATTG  
TCAACCTCTTTCA-----GATATGAATCCATCTGATTTCAGAAGGGGAAGAAGCTTGCAT---CAGTATCTCAAT-----  
TTCAATTCAAACATGGGTTTGATTTCACATTCCATGTTCTGAGAAATATTTACCATCCGAAAAGAGG-----

-----  
AAAAAACGG-----AGTCTTTGT-----  
CTAAAG-----AAATGCGTTGAGAAACGGCAG-----ATGTATAGACCCTTTCAA---  
CGAGATAGTGCTTTTTCAAATTTCTCAAATGGAAT---CTGTTCCAAACATAT---  
ATGCCATGGTTCCTTACTTCGACAGGGTGCAAATATCTAAATTTACCCTTTTAGATACTTTT---TCAGAC---  
CTATTGCCGATA---CTA-----

-----AGT-----AGCAGT-----CAAATTTTGTATCCATTTT---  
-----CATGATATTATGCATGGATCAGATATATCATGGCCAATTCCTCAGAAAAA-----  
TTGTGGGTGATTCTTCCACAA-----  
TGGAATCTGATA-----AGTGAGATT-----  
TCGAGTAAGTGTTTACATAAT-----CTTCTTCTGTCCGAA-----GAAATGATTTCGTCGA-----  
AATAATGAGTCACCCATTCCATTGATATGGGCACATCTGAGATCACCAAATGCTCGGGAGTTTCTCTATTCAATCCTTTT  
CCTTCTTCTTGTGCTGGATATCTCGTTTCGTACACATCTTCTCTTTGTTTCC-----  
CGAGCCTCTAGTGAGTTACAGACAGAGTTCGAAAAGATCAAATCTTTGATGATTCCATCATAACATGATTGAGTTGCGAAA  
ACTTCTGGATGGGTATCCTACA-----TCT-----  
GAACTGAATTCTTTC-----

-----  
TGGTTAAAGAATCTCTTTCTAGTTGCTCTGAAACAATTAGGAGATTTTCTAGAAGAAATACGGGGTTCTGCTTCTGGTGG  
CAACATGCTTTTTGGGTGGTGGTCCC-----  
GCTTATGGGGTCAAATCAATACGTTCTAAGAAGAAATATTTGAATATCAATCTCATCGATATCATCGATTTTCTAAGTAT  
CATACCAAATCCCATCAATCGAATCACTTTTTTCGAGAAATACGAGACATCTAAGTCGTACAAGTAAAGAGATCTATTTCAT  
TGATAAGA-----AAAAGAAA---  
AACGTGAAC-----GGTGAT-----  
TGGATTGATGATAAAATCGAATCCTGGGTGCGAAACAGTGATTTCGATTGATGATGAAGAAAGAGAATTCTTGGTTTCAGTT  
CTCCACC-----TTAATGAAAGAAAAAGGATTGATAAAATCTATTGAGTCTGACTCATAGTGATCATTATCA----

-----  
AAGAATGATTCTGGTTATCAAATGATTGAACAACCGGGATCAGTTTACTTACGATACTTAGTTTACATTTCATAAAAAGTA  
TCTAATGAATTATGAGTTCAATAGATCCTGTTTAGCAGAAAGACGGATATTCCTTGCTCATTATCAGACAATCACTTATT  
CACAAACCTCGTGTGGGGCTAATAGTTTTTCATTTCCCATCT---  
CATGGAAAACCTTTTTCGCTCCGCTTAGCCCTATCCCCCTCT---  
AGGGGTATTTTAGTGATAGGTTCTATAGGAACTGGACGATCATATTTGGTCAAATACCTAACGACAAAAC---  
TCCTATGTTCTTTTATTACGGTATTTCCGAACAAGTTTCTGGATGAC---  
AAGCCTAAAGGTTATCTTATTGATGATATCAATATTGATGATAGTGACGATATTGATGATAGTGACGATATC-----

Nicotiana CAAAATACCGTCTCAATTCATCCTATTTTCATCAGATCCGGGATGT-----

-----  
GATATGGTTCGAAAGGATGAACCGGATATGGACAGTTCCAATAAGATTTTCATTCTTGAACAAAAATCCATTTTTTTGATT  
ATTTTCATCTATTCCATGACCGGAACAGGGGAGGATACACGTTA-----CACTACGATTTT---GAATCA-----  
GAAGAGAGATTTCAAGAAATGGCAGATCTATTCATCTATCAATAACCGAGCCGGATCTGGTGTATCATAAGGGATTGCG  
CTTTTCTATTGATTCC-----  
TGCGGATTGGATCAAAAACAATTCTTGAATGAG-----GCCAGGGATGAATCGAAAAAGAAATCTTTATTG-----

-----  
GTTCTACCTCCTATTTTTTATGAAGAGAATGAATCTTTTTCTCGAAGGATCAGAAAAAATGGGTCCGGATCTCCTGCGG  
GAATGATTTGGAAGATCCAAAACCAAAA---  
ATAGTGGTATTTGCTAGCAACAACATAATGGAGGCAGTCACTCAATATAGATTGATCCGAAATCTGATTCAAATCCAA--  
----TATAGTACC-----

TATGGGTACATAAGAAATGTATTGAATCGATTCTTTTTAATGAATAGATCCGATCGCAACTTCGAATATGGAATTCAA--  
----AGGGATCAAATAGGAAAGGATACTCTGAATCATAGAACTATAATGAAATATACGATCAACCAATATTTATCGAAT-  
-----TTGAAA---  
AAGAGTCAGAAGAAATGGTTTCGAGCCTCTTATTTTGATTTCTCGAACCGAGAGATCCATGAATCGGGATCCTGATGCATA  
TAGATACAAATGGTCCAATGGGAGCAAGAATTTCCAGGAACATTTGGAACAGTCCGTTTCGGAGCAGAAGAGCCGTTTT-  
-----CAAGTA-----GTGTTTCGAT-----  
-----CGA-----TTACGTATTAAT-----  
CAATATTCGATTGATTGGTCTGAGGTTATCGACAAAAAAGAT-----  
-----TTGTCTAAGCCACTTCGTTTCTTTTTGTCC---AAGTCACTTCTT---  
TTTTTGTCCTCAAGTTGCTT-----  
----TTCTTTTTGTCTAACTCACTTCTCT---TTTTCTGTGTGAGTTTCGGAAATATCCCC---  
ATTCATAGGTCCGAGATCTACATCTATGAA---  
TTGAAAGGTCCGAATGATCAACTCTGCAATCAGTTGTTAGAATCAATAGGTCTTCAAATTGTTCAATTTGAAAAAATGGAA  
ACCCTTCTTATTG-----  
GACGATCATGATACTTCCCAAAAATCGAAATTTCTTGATCAATGGAGGAACAATATCACCATTTTTGTTCATAAAGATAACC  
A---AAGTGGATG---ATTGACTCATTCCATACTAGAAATAATCGCAGGAAATCCTTTGATAACCCGGATTCC---  
TATTTCTCAATGATATTCCACGATCAAGACAATTGGCTGAATCCCGTGAAACCATTTTCATAGAAGTTCATTGATATCTTC  
TTTTTATAAAGCAAATCGACTTCGATTCTTGAATAATCCACATCATTCTGCTTCTATTGGAACACAAGATTCCCCTTTT  
CTGTG-----GAAAAGGCCCGTATCAATAATTCTGATTTTACG-----TATGGACAATTCCTCAAT-----  
-----ATCTTGTTTCATTTCGCAACAAAATATTTTCTTTGTGCGTCCGT-----  
AAAAAAAACATGCTTTTTTG---GGGAGAGATACTATTTCA-----  
CCAATCGAGTCACAGGTATCTAACATATTCATACCT-----AACGATTTT-----  
CCACAAAGT---GGTGACGAAACGTATAACTTG-----  
TACAAATCTTTCCATTTTCCAAGTCGATCCGATCCATTTCGTTTCGT-----  
AGAGCTATTTACTCGATCGCAGACATTTCTGGAACACCTCTAACAGAGGGGCAAATAGTCAATTTTGAAAGAAGTATTG  
TCAACCTCTTTCA-----GATATGAATCTATCTGATTGAGAAGGGAAGAAGTTCAT---CAGTATCTCAAT-----  
TTCAATTCAAACATGGGTTTGATTACACTCCATGTTCTGAGAAAGATTTATCATCCGAAAAGAGG-----  
-----  
-----  
AAAAAACGG-----AGTCTTTGT-----  
CTAAAG-----AAATGCGTTGAGAAAGGGCAG-----ATGTATAGAACCTTTCAA---  
CGAGATAGTGCTTTTTCAACTCTCTCAAATGGAAT---CTATTCCAAACATAT---  
ATGCCATGGTTCCTTACTTCGACAGGGTACAAATATCTAAATTTGATATTTTGTAGATACTTTT---TCAGAC---  
CTATTGCCAATA---CTA-----  
-----  
-----AGT-----AGCAGT-----CAAAAATTTGTACCCATTTTT---  
-----CATGATATTATGCATGGATCAGGTATATCATGGCGAATTCTTCAGAAAAA-----  
TTGTGT-----CTTCCACAA-----  
TGGAATCTGATA-----AGTGAGATC-----  
TCGAGTAAGTGTTTACATAAT-----CTTCTTCTGTCCGAA-----GAAATGATTCATCGA-----  
AATAATGAGTCA-----  
CCATTGATATCGACACATCTGAGATCGCCAAATGCTCGGGAGTTCCTCTATTCAATCCTTTTCTTCTTCTTGTGCTGG  
ATATCTCGTTTCGTACACATCTTCTCTTTGTTTCC-----  
CGGGCCTCTAGTGAGTTACAGACAGAGTTCGAAAAGGTCAAATCTTTGATGATTCCATCATCTATGATTGAGTTGCGAAA  
ACTTCTGGATAGGTATCCTACA-----TCT-----  
GAACCGAATTCTTTC-----  
-----  
-----  
TGGTTAAAGAATCTCTTTCTAGTTGCTCTGGAACAATTAGGAGATTCTCTAGAAGAAATACGGGGTTCTGCTTCTGGCGG  
CAACATGCTT-----GGTCCC-----  
GCTTATGGGGTCAAATCAATACGTTCTAAGAAGAAAGATTGGAATATCAATCTCATCGAGATCATCGATCTC-----  
-  
ATACCAAATCCCATCAATCGAATCACTTTTTTCGAGAAATACGAGACATCTAAGTCATACAAGTAAAGAGATCTATTCATT  
GATAAGA-----AAAAGAAAA---  
AACGTGAAC-----GGGGAT-----  
TGGATTGATGATAAAATAGAATCCTGGGTCGCGAACAGTGATTGATTGATGATGAAGAAAGAGAATTTCTTGGTTTCAGTT  
CTCCACC-----TTAACGACAGAAAATAGGATTGATCAAATCTATTGAGTCTGACTCATAGTGATCGTTTATCA-----



-----  
AAGAATGACTCTGGTTATCAAATGATTGAACAACCGGGAGCAATTTACTTACGATACTTAGTTGACATTCATAAAAAGCA  
TCTAATGAATTATGAGTTCAATCCATCCTGTTTAGCAGAAAGACGGATATTCCTTGCTCATTATCAGACAATCACTTATT  
CACAAACTTCGTGTGGGGAAAATAGTTTTTCATTTCCCCTCT---  
CATGGAAAACCCTTTTTCGCTCCGCTTAGCCTTATCCCCCTCT---  
AGGGGTATTTTAGTGATAGGTTCTATAGGAACTGGACGATCCTATTTGGTCAAATACCTAGCGACAAAAC---  
TCCTATGTTCCCTTTCATTACGGTATTTCTGAACAAGTTCCTGGATAAC---  
AAGCCTAAAGGTTTTCTTCTTGATGAGATCGATATTGATGATAGTGACGATATTGATGATAGTGACAATCTTGATGCTAG  
TGACGATATC-----  
Nuphar CAAAATACCGTCTCAATTCATCCTATTTTCATCAGATCCGGGATGT-----  
-----  
GATATGGTTCAGGGATGAACCGGATATGGACAGTTCTAATAAGATCTCATTCTTGAACAAAAACCCATTTTGTGATT  
ATTCCATCTATTCCATGACCGGAACAAAGGGAGATACACGTTG-----CACCACGATTTT---GAATCA-----  
GAAGAGAGATTTCAAGAAATGGCAGATCTATTCCTCTATCAATAACCGAGCCTGATCTGGTGTATCATAAGGGATTG  
CTTTTCTATGGATTCC-----  
TACGGGTTGGATCAAAAAAATTCTTGAATGAGGTATTCAACTCCAGGGATGAATCGAAAAAGAACTCTTTATTG-----  
-----  
GTTCTACCTCATATTTTTTATGAAGAGAATGAATCTTTTTATCGAAGGATCAGAAAAAATGGGTCCGGATCTCCTGCAG  
GAATGGTTTGAAGATCCAAAACCAAAA---  
ATAGTGGTATTTGCTAGCAACAACATAATGGAGGCAGTCAATCAATATAGATTGATCCGAAATCTGATTCAAATCCAA--  
----TATAGCACC-----  
TATGGGTACATAAGAAATCTATCGAATAGATTCTCTTTAATGAATAGATCCGATCGCAACTTCGAATATGGAATTCAA--  
----AGGGATCAAATAGGAAATGATACTCTGAATCATATAACTATAATGAAATATATGATCAACCAACATTTATCGAAT-  
-----GTGAAA---AAGAGTCAGAAGAAATGGTTCGATCCTCTTATT-----  
TCTCGAACCGAGAGATCCATGAATCGGGATCCTAATGCATATAGATACAAATGGTCCAATGGGAGCAAGAATTTCCAGGA  
GCATTTGGAGCATTTCGTTTCTGAACAGAAGAACCCTTTT-----CAAGTA-----  
GTGTTTCGAT-----CGA-----TTACGTATTAAT--  
----CAACATTCGATTGATTGGTCCAAGGTTATCGACAAACAAGAT-----  
-----TTGTCTAAGTCACTTCATTTCTTTTTGTCC---AAGTCACTTCTC---  
TTTTTGTCTAAGTCACTT-----  
-----ACT---TTTTTCTTTGTGAGTATCGGGAATATCCCC---  
ATTCATAGGTCCGAGATCCACATCTATGAA---  
TTGAAAGGTCCGAATGATCAACTCTGCAATCAGTTGTTAGAATCAATAGGTGTTCAAATCGTTCATTTGAATAAATTGAA  
ACCTTTCTTATTG-----  
GATGATCATGATACTTCCCAAAGATCGAAATTTCTTGATCAATGGAGGAACAATATCAGCATTTTTTGTTCAATAAGATAACC  
A---AAGTGGATG---ATTGACTCACTCCATACTAGGAATAATCGCAGGAAATTTCTTTGATAACACCGATTCC---  
TATTTCTCAATGATATCCCACGATCGGGACAATTGGCTGAATCCCGTGAAACCATTTTCATAGAAGTTCATTGATATCTTC  
TTTTTATAAAGCAAATCTACTTCGATTCTTGAATAATCCACATCACTTCTGCTTCTATTCTAACAAAAGATTCCCTTTTT  
ATGCG-----GAAAAGACCCGTATCGATAATTATGATCTTACA-----  
TATGGACAATTCCTCCATACATATGGACAATTCCTCCATATCTCGTTCATCCGCAACAAGATATTTTCTTTGTGCGTCGG  
T-----AAAAAAAACATGTTTTTTTGG---GAGAGAGATACTATTTCA-----  
CCAATCGAGTCACAGGTATCTGACATATTCATACCT-----AACGATTTT-----  
CCACAAAGT---GGTATGAAACGTATAACTTG-----TACAAATCT-----  
-----CAGCCTCTTTCA-----  
-----ACTTATTGTGACGCTCTTTCA-----GATATGAATCTATCTGATTGAGAAGGGAAGAACTTGCAT---  
CAGTATCTCAGT-----TTCAATTCAAACATGGGTTTGATTACACTCCATGTTCTGAGAAATATTTACCATCCGCA--  
-----  
-----AAAAAACGG-----  
-AATCTTTGT-----CTAAAG-----AAATGCGTTGAGAAAGGGCAG-----  
ATGTATAGAGCCTTTCAA---CGAGATAGTGCTTTTTTCAAATCTCTCAAAATGGAAT---CTGTTCCAAACGTAT---  
ATGCCATGGTTCCTTACTTCGGCAGGGTGCAAATATATAAATTTAATCCTTTTTAGATACTTTTT---TCAGAC---  
CCATTGCCGATA---CTA-----  
-----AGT-----AGCAGT-----CACAAATTTGTATCCTTTTTTT---  
-----TATGATATTACGCATGGATCAGATATATCATGGTCAATTTCTTCAGATTCCA-----  
TTGTGGGCGATTCTTCCACAA-----

TGGAATCTGATA-----AGTGAGATT-----  
TCGAGTAAGTGTTCACAGAAT-----CTTCTTCTGCCCCGAA-----GAAATGATTCATCGA-----  
AATAATGAGTCACCCGTTCCGTTGAAATGGACACATCTGAGATCACCAAATGCTCGGGAGTTCTCTATTCAATCCTTTT  
CCTTCTTCTTGTGGTGGGTATCTCGTTTCGTACGCATCTTCTCTTTATTTCC-----  
CGAGTCTCTAGTGAGTTACAGACAGAGTTAGAAAAGATCAAATCTTTGATGATTCAATCATAACATGATTGAGTTGCGAAA  
ACTTCTGGATAGGTATCCTCCA-----CCT-----  
GAACTGAATTCTTTC-----

-----  
TGGTTAAAGAATCTCTTTCTAGTTGCTCTGGAACAATTAGGAGATTCTCTGGAAGAAATACGGAGTTCTGCTTCTGGTGG  
CAACATGCTATTGGGTGGTGGTCCC-----  
ACTTATGGGGTCAAATCAATACGTTCTAAGAAGAAAGATTTGAATATCAATCTCATCGATATCATCTATCTCATAAGTAT  
CATACCAAATCCCATCAATCCAATCACTTTTTTCGAGAAATACGAGACATCTAAGTCGTACAAGTAAAGAGATCTATTCAT  
TGATAAGA-----AAA-----  
AACGTGAAC-----AGTGAT-----  
TGGATTGATGATCAAATAGAATCCTGGGTCGCGAACAGTGATTTGATTGATGATGAAGAAAGAGAATTCTTAGTTCAGTT  
CTCCACC-----TTAACGACAGAAAAAGGATTGATCAAATCTATTGAGTCTGACTCATAGTGATCATTTATCA-----

-----  
AAGAATGACTCTGGTTATCAAATGATTGAACAACCGGGATCCATTTACTTACGATACTTAGTTGACATTCATAAAAAGTA  
TCTAATGAATTATGAGTTCAATAGATCCTGTTTAGCAGAAAGACGGATATTCCTTGCTCATTATCAGACAATTACTTATT  
CACAAACCCCGTGTGGGGCTAATAGTTCTCATTTCCCATCT---  
CATGAAAACCCTTTTCGCTCCGCTTAGCCCTACCCCTTCT---  
AGGGGTATTTTAGTGATAGGTTTTATAGGAAGTGGACGATCATATTTGTCAAATACCGAGTGACAAAAC---  
TCCTATGTTCTTTTATTACGGTATTTCCGAACAAGTTTCTGGATGAC---AAT---  
AAAGGTTATCTTATTGATGATATCGATATTGATGATAGTGACGATATCGATATTGATGATAGTGACGATATC-----

-----  
Nymphaea CAAAATACCGTCTCAATTCATCTATTTTATCAGATCGGGGATGT-----

-----  
GATATGGTTCCGAAGGATGAACCGGATATGGACAGTTCTAATAAGATCTCATTCTTGAACAAAAACCCATTTTGTGATTT  
ATTCCATCTATTCCATGACCGGAACAAAGGGAGATACACGTTG-----CACCACGATTTT---GAATCA-----  
GAAGAGAGATTTCAAGAAATGGCAGATCTATTCATCTATCAATAACCGAGCCTGATCTGGTGTATCATAAGGGATTTGC  
CTTTTCTATTGATTC-----  
TACGGGTTGGATCAAAAAAATTCTTGAATGAGGTATTCAACTCCAGGGATGAATCGAAAAAGAACTCTTTATTG-----

-----  
GTTCTACCTCATATTTTTTATGAAGAGAATGAATCTTTTTATCGAAGGATCAGAAAAAATGGGTCCGGATCTCCTGCAG  
GAATGGTTTGGAGATCCAAAACCCAAA---  
ATAGTGGTATTTGCTAGCAACAACATAATGGAGGCAGTCAATCAATATAGATTGATCCGAAATCTGATTCAAATCCAA--  
----TATAGCACC-----  
TATGGGTACATAAGAAATCTATCGAATAGATTCTTTTTAATGAATAGATCCGATCGCAACTTCGAATATGGAATTCAA--  
----AGGGATCAAATAGGAAATGATACTCTGAATCATATAACTATAATGAAATATATGATCAACCAACATTTATTGAAT-  
-----GTGAAA---AAGAGTCAGAAGAAATGGTTTCGATCCTCTTATT-----  
TCTCGAACCGAGAGATCCATGAATCGGGATCCTAATGCATATAGATACAAATGGTCCAATGGGAGCAAGAATTTCCAGGA  
GCATTTGGAGCATTTCGTTTCTGAACAGAAGAACCCTTTT-----CAAGTG-----  
GTGTTTCGAT-----CGA-----TTACGTATTAAT--  
----CAACATTCGATTGATTGGTCCAAGGTTATCGACAAAACAAGAT-----

-----  
----CTCTTTTTGTCTAAGTCACTTACT---TTTTTCTTTGTGAGTATCGGGAATATCCCC---  
ATTCATAGGTCCGAGATCCACATCTATGAA---  
TTGAAAGGTCCGAATGATCAACTCTGCAATCAGTTGTTAGAATCAATAGGTGTTCAAATCGTTTCAATTTGAATAAATTGAA  
ACCCTTCTTATTG-----  
GATGATCATGATACTTCCCAAAGATCGAAATTTCTTGATCAATGGGGGAACAATATCAGCATTTTTTGTTCAATAAGATAACC  
A---AAGTGGATG---ATTGACTCACTCCATACTAGGAATAATCGCAGGAAATTTCTTTGATAACACCGATTCC---  
TATTTCTCAATGATATCCCACGATCGGGACAATTGGCTGAATCCCGTGAAACCATTTTATAGAAGTTTCAATGATATCTTC  
TTTTTATAAAGCAAATCTACTTCGATTCTTGAATAATCCACATCACTTCTGCTTCTATTCTAACAAAAGATTCCCTTTTT  
ATGCG-----GAAAAGACCCGATCGATAATTATGATCTTACA-----TATGGACAATTCCTCCAT-----  
-----ATCTCGTTCATCCGCAACAAGATATTTTCTTTGTGCGTCCGT-----

AAAAAAAAACATGTTTTTTTGG---GAGAGAGATACTATTTCA-----  
CCAATCGAGTCACAGGTATCTGACATATTCATACCT-----AACGATTTT-----  
CCACAAAGT---GGTGACGAAACGTATAACTTG-----TACAAATCT-----  
-----CAGCCTCTTTCA-----  
-----ACTTATTGTCAGCCTCTTTCA-----GATATGAATCTATCTGATTGAGAAGGGAAGAAGCTTGCAT---  
CAGTATCTCAGT-----  
TTCAATTCAAACATGGGTTTGATTACACTCCATGTTCTGAGAAAGATTTACCATCCGCAAAA-----  
-----  
---AAACGG-----AATCTTTGT-----  
CTAAAG-----AAATGCGTTGAGAAACGGCAG-----ATGTATAGAGCCTTTTCAA---  
CGAGATAGTGCTTTTTCAAATCTCTCAAATGGAAT---CTGTTCCAAACGTAT---  
ATGCCATGGTTCCTTACTTCGGCAGGGTGCAAATATATAAAATTTTCATCCTTTTAGATACTTTT---TCAGAC---  
CCATTGCCGATA---CTA-----  
-----AGT-----AGCAGT-----CACCAATTTGTATCCTTTTTT---  
-----TATGATATTATGCATGGATCAGATATATCATGGTCAATTCTTCAGATTCCA-----  
TTGTGGGCGATTCTTCCACGA-----  
TGGAATCTGATA-----AGTGAGATT-----  
TCGAGTAAGTGTTTACAGAAT-----ATTCTTCTGCCCGAA-----GAAATGATTCATCGA-----  
AATAATGAGTCACCCGTTCCATTGAAGTGGACACATCTGAGATCACCAAATGCTCGGGAGTTTCTCTATTCAATCCTTTT  
CCTTCTTCTTGTGCTGGATATCTCGTTCGTACGCATCTTCTTTTATTTC-----  
CGAGTCTCTAGTGAGTTACAGACAGAGTTAGAAAAGATCAAATCTTTGATGATTCCATCATAACATGATTGAGTTGCGAAA  
ACTTCTGGATAGGTATCCTCCA-----CCT-----  
GAACTGAATTCTTTC-----  
-----  
TGGTTAAAGAATCTCTTTCTAGTTGCTCTGGAACAATTAGGAGATTCTCTGGAAGAAATACGGAGTTCTGCTTCTGGTGG  
CAACATGCTATTGAGTGGTGGTCCC-----  
ACTTATGGGGTCAAATCAATACGTTCTAAGAAGAAAGATTTGAATATCAATCTCATCGATATCATCTATCTCATAAGTAT  
CATACCAAATCCCATCAATTCATCACTTTTTTCGAGAAATACGAGACATCTAAGTCGTACAAGTAAAGAGATCTATTCAT  
TGATAAGA-----AAA---  
AACGTGAAC-----AGTGAT-----  
TGGATTGATGATCAAATAGAATCCTGGGTGCGAACAGTGATTTGATTGATGATGAAGAAAGAGAATTCTTAGTTCAGTT  
CTCCACC-----TTAACGACAGAAAAAGGATTGATCAAATCTATTGAGTCTGACTCATAGTGATCATTTATCA----  
-----  
AAGAATGACTCTGGTTATCAAATGATTGAACAACCGGGATCCATTTACTTACGATACTTAGTTGACATTCAAAAAAGGTA  
TCTAATGAATTATGAGTTCAATAGATCCTGTTTAGCAGAAAGACGGATATTCCTTGCTCATTATCAGACAATTACTTATT  
CACAAACCCCGTGTGGGGCTAATAGTTCTCATTTCATCT---  
CATGAAAACCCTTTTGCTCCGCTTAGCCCTACCCCTTCT---  
AGGGGTATTTTAGTGATAGGTTTTATAGGAAGTGGACGATCATATTTGTCAAATACCGAGTGACAAAC---  
TCCTATGTTCCCTTACATTACGGTATTTCCGAACAAGTTCCTGGATGAC---AAT---  
AAAGGTTATCTTATTGATGATC-----  
GATATTGATGATCGTGACGATATCGATATTGATGATCGTGAC-----  
-----  
Oenothera -----  
-----  
-----GAACTG---GATTCA-----  
GAAGAGAGATTTCAAGAAATGGCAGATCTATTCATCTATCAATAACCGAGCCGGATCTGGTGTATCATAAGGGATTGCG  
CTTTTCTATTGATTCT-----  
TCCGTATTGGATCAAAAACAATTCTTGGCTGAG-----GCCAGGGATGAATCGAAAAAGAAATCTTTATTG-----  
-----  
GTTCTACCTCCTGTTTTTTTACCAAGAGAATGAATCTTTTTTATCGAAGGATCAGAAAAAGGGGGTCCAGATCTCCTGCGG  
GAATGATTTGGAAGATCCAAAACCAAAA---  
ATAGTGGTATTTGCTAGCAACAACATCGTGGAGGCAGTCAATCAATATAGATGGATCCGAAATCTGATTCAAATCCAA--  
----TATAGCACC-----

CATGGGTACATAAGAAATGTATTGAATCGATTCTTTTTAATGAATCGATCCGATCGCAACTTCGAATATGGAATTCAA--  
----AGGGATCAAATAGGAAATGATACTCTGAATCATAGAACTTTTATGAAATATACGATCAACCAACATTTATCGAAT--  
-----TTGAAA---  
AAGAGTCAAAAGAAAGGGTCCGATCCTCTTATTTTTGATTTCTCGAACCGAGAGATCCGTGAATCGGGATCCTAATGCATA  
TAGATACAAATGGTCCAAGGGGAGCAAGAATTTCCAGGAACATTTGGAACATTTTCGTTTCTGAGCAGAAGAGCCGTTTT--  
-----CAAGTG-----  
GTCTTCGATCGATATCGATCAATACGTAATCGATATCGATCAATACGTAATCGATATCGA-----TCACGTATTAAC--  
-----  
CAATATTCGAGTGATCGGTCTGAGGTTAGCGACAAAAAGATAATCGATATCGATCACGTATTAACCAATATTCGAGTGA  
TCGGTCTGAGGTTAGCGACCAAAAAATTTGGCTAAGTTCGGTCTTTTCGTTTTCTCC---AAG-----  
-----TTACTT-----  
CTTTTTTTGTCTAACTCACTTCT---  
TTTTTCTTTGTGAGTTTTCGGGAATACCCCCCATTTCAGAGGTCCGAGATCCGCGTCTCTGAA---  
TTGAAAGGTCCGAATGATCGACTCTGCAATCAGTTCCTTAGAATCAATAGGTCTTCAACTCGTTTATTTGAAAAAATTGAA  
ACCATTCTTATTG-----GATGATCATGAGACTTCCCAAAAATCGAAA-----  
--TTATTGTTCAATAAGAAACCA---GAGGGGATG---  
ATTGACTCATTCCATACTAGAAATAATCGCGGAAATCTTTGGAT-----TCC---  
TATTTCTCAATGATATCCCACGATCAAGACAATTGGTTGAATCCCGTGAAACCATTTTCATAGAAGTTCATTGATCTCTTC  
TTTTTATAAAGCAAATCGACTTCGATTCTTGAATAATCCACATGACTTCGGCTTCTTTTGTAAACAAAAGATTCCCCTTTT  
ATGTG-----GAT-----ATCAAGAATTTGGATTTTACG-----TATGGACAATTCCTCAAT-----  
-----ATCTTGTTCATTTCGCAACACAAAATTTCTTTGTGCGGCGAC-----  
AAAAAAAACATGCTTTTTTTG---GAGAGAGATACTATTTCA-----TCAATCGAGTACAGGTATCTAACCTATTC--  
-----AAGGATTTT-----CCACAAAGT---GGTGACGAAAGGTATAACTTT-----  
-----TACAAATATTTCCACCTTGCAATGCGATCTGATCCATTAGTTTCGT-----  
AGAGCTATTTACTCGATCGCAGACATTTCTGGAACACCTCTAACAGAGGGACAGAGAGTCAATTTTGAAAGAACTTATTG  
TCAACCTCTTTCA-----GATATGAATCTATCTGATTTCAGAAGGGAAGAAGTGTAT---CAGTATCTCAAT-----  
TTCAATTCAAACATGGGTTTGATT-----  
TATTCTGAGAAATGTTTCTCATCCGAAAAGAGGAAAAAGAAAAACCCGAAAAGAGGAAAGAGAAAAACCCGAAAAGAG  
GAAAGAGAAAAACCCGAAAAGAGGAAAGAGAAAAACCCGAAAAGAGGAAAGAGAAAAACCCGAAAAGAGGAAAGAGA  
AAAAACCCGAAAAGAGGAAAGAGAAAAACCCGAAAAGAGGAAAGAGAAAAACAG-----  
-----AGTCTTTAT-----CTAAAG-----CAATGGGTTGAGAAAGTGCAG--  
-----ATGGATAGAGCCTTGCAA---GGAGAGAGGGTTTCTTTAATTCTCTCAAACCTGGAAT--  
--  
CTATTCAAAACATATGTTATGCCATTTAGCCTTACCTCGACAGGGTACAATTTGCTAAAGTTGATGTTTTTTAGATACTTT  
GGGATCATACT---GTAATGCCGCTA---CTA-----  
-----AGG-----AGCAGT-----  
CCAAAATTTGTATCCATTTGT-----  
TATGCTATATCTGATCCATGCGGAATATCATGGCGAATTCTTCAGAAAAAA-----TTGTGT-----CTTTTACAA--  
-----TGGAATTGGATA-----  
AGTGCGATT-----TCGAATAAGTGTTTTCCATAAG--  
----CTTCTTCTGTCTGAA-----GAAAGTATTCATCGA-----AATAATGAGTCA-----CCATCGATG---  
ACAGATCTGAGATGGCCAAATCTTGGGGCGTTTCTCTATTCAATCCTTTTCTTCTTTTTGTTGCTGGACATCTCGTTTT  
TTCACACCTTCTCTTTTTATCC-----  
CAAGACTTTAGTGAGTTACAGAGAGATTTGCAAGGGCCCAATCTTTGATGATTCCATCATAACATCGTGGAGTTGCGAGA  
ACTTCTGGATATGTACCCCGCACCTCGTTCT-----  
-----  
-----TTCAAGAAGCTCTTTCTAGCTGCTCGGGAAAAATTAGTAAATTATCTA-----  
-----CGATGGGGTGGTGGACGC-----  
AAATCTTTTCTTATCCATCTC-----  
TTCGAGCTCCTCAATATCACACCAAATCCCATCGATCGAATCGCTTTTTTTGAAAAATACGAGACATCTAAGTCATAACAAG  
TAAAGAGCTCTATTCATTGATAACAGAGCTAGGGGATTTCTCTTCTCTCTGTTCTGGTCAACGTTATCGTTATGATCAAA  
TAATAGAA---AATGTGAAC-----  
GGTCCTTGTGTTTGATTGACGATAAAATAGAATCCTGGATCTCGAACTGTGATGCGATTGAGGATAAAGAAAGAGAATT  
CTTGGTTCCGTTTTGCAAC-----  
TTCACGAGAGAAACAAGGATTGATCAAATTCATTGAGTTTGACTCATAGTGATCATTATCA-----





CGAGATAGTGCTTTTTCAACTCTCTCAAAATGGAAT---CTATTCCAAACATAT---  
ATGCCATGGTTCCCTTACTTCGACAGGGTACAAATATCTAAATTTTATATTTTTAGATACTTTT---TCAGAC---  
CTATTGCCGATA---CTAAGTCTA-----  
-----  
-----AGT-----AGCAGT-----CAAAAATTTGTATCCATTTTT---  
-----CATGATATTATGCATGGATCAGATATATCATGGCGAATTCTTCAGAAAAA-----  
TTGTGT-----CTTCTACAA-----  
TGGAATGGAATCTGATA-----AGTGAGATT-----  
----TCGAGTAAGTGTTCCATAAT-----CTTCTTCTGTCCGAA-----GAAAGGATTCATCGA-----  
AATAATGAGTCG-----  
CCATTGATATCGACACATCTGAGATCGCCAAATGTTCCGGGAGTTTCTCTATTCAATCCTTTTCTTCTTGTGCTGG  
ATATCTCGTTTGTACACATCTTCTCTTTGTTCC-----  
TGGCCTCTAGTGAGTTACAGACAGAGTTTGAAAAGGTCAAATCTTTGATGATTCCATCATCTATGATTGAGTTGCGAAA  
ACTTCTGGATAGGTATCCTACA-----TCT-----  
GAACCGAATTCTTTC-----  
-----  
TGGTTAAAGAATCTCTTTCTAGTTGCTCTGGAACAATTAGGAGATTCTCTAGAAGAAATACGGGGTTCTGCTTCTGGCGG  
CAACATGCTATTGGGTGGTGATCCC-----  
GCTTATGGGGTCAAATCAATACGTTCTAAGAAGAAATATTTGAATATCAATCTCATCGATATCATCGATCTCATAAGTAT  
CATACCAAATCCCATCAATCGAATCACTTTTTCGAGAAATACGAGACATCTAAGTCATACAAGTAAAGAGATCTATTCT  
TGATAAGA-----AAAAGAAA---  
AATGTGAAC-----GGGGAT-----  
TGGATTGATGATAAAATAGAATCCTGGGTGCGAAACAGTGATTGATTGATGATGAAGAAAGAGAATTCTTGGTTCAGTT  
CTCCACC-----TTAACGACAGAAAAAGGATTGATCAAATCTATTGAGTCTGACTCATAGTGATCATTATCA----  
-----  
AAGAATGACTCTGGCTATCAAATGATTGAACAACCGGGAGCAATTTACTTACGATACTTAGTTGACATTCATAAAAAGTA  
TCTAATGAATTATGAGTTCAATACATCCTGTTTAGCAGAAAGACGGATATTCTTGTCTATTATCAGACAATCACTTATT  
CACAAACCTCGTGTGGGGCTAATAGTTTGAATTTCCCATCT---  
CATGAAAACCCTTTTGCTCCGCTTAGCCTTATCCCCCTCT---  
AGGGGTATTTTAGTGATAGTTCTATAGGAACTGGACGATCCTATTTGGTCAAATACCTAGCGACAAAC---  
TCCTATGTTCTTTTATTACGGTATTTCTGAACAAGTTTCTGGATAAC---  
AAGCCTAAAGGTTTTCTTATTGATGATATCGATATTGATGCTAGTGACGATATTGATGCTAGTGACGATATTGATGCTAG  
TGACGATATTGATGCTAGTGACGATATC-----  
Pelargonium CAAAAGACCGTATCAATTTATCTATTTTATCATAGATCCGGGATGT-----  
-----  
GATAGGGTCCGAAGGATGAACCTGGATGTGGACAGTTCCAAGAAGATTTTCAATTTTTCAAAAAAATCCATTTTTTATT  
ATTGAATCTATTCCATGACCGTAGCAGGGGGGATACACGTTA-----GAGCGCATTTT---GAATCA-----  
GAAGAGCGATTTGAAGAAAGGGCGGATCTATTCATCTATCAATAACCGAGCCAGATCAGGTGTATCAT-----  
-----  
-----  
AATAGTCCGAAAATGGATCTGATTCACATCCAA-----GAG-----  
AAGGGGTACATAAGAAAGGTATTGGATCGATTCTTTTTAATGAATCGATCCGCTCGCAACTTCGAGTCTGGAATTCCA--  
----GGGGTCAAATAGGAAATGAGACTCTGAGTCATAGAATCTAATGAAATATACGGTCAACCGACATTTCTCGAGT-  
-----TTGAAA---AAGAGTCGAAAGAAAAGCTTCGATCCTCTTCTTTTTATC-----  
GAGAGATCCATGAATCGGGATCCTGCCGCATATAGAGACAAATGGTCCAAGGGGGCAAGACTTTCCAGGAACATTTGGA  
ACATTTGTTTTCTGAGCAGAAGAACCGTTTT-----AAAGTGCAGAAGAGCCGTTTTAAAGCAGTCTTCGAT----  
-----CGA-----TTCCATCAATCT-----  
CAATATTCGATTGATTGGTCCGTGTTTATTGACAAACAAGAT-----  
-----TTTCCTAAGGCACGTCTTTTCTTTTTGTTGTTGATTAGTTCGTTCC---  
TTTTTGTACAAGTCACTTCTTTCTTGTGTCGAAGTTACCTCTCTTGTGTCGAAGTTACCTCTCTTGGTGTGCAAGGT  
ACTTCCCTTGTGTTCCAAGTTACTGCCT---TTTTTCTTTGTGAGTTGCGGGAATATCCCC---  
ATTCATAGGTCCGAGATCCGCATCTATGAA---  
TTGAAGGGTCCGACTGATCAACCCTGCAATCCGTTGTTAGAATCAATAGGTCTTCAAATCCTTCAATTTGAACAAATTGAA  
ACCCTGCTTATTG-----GATGATCATGAGACTTCCCAAAAATCCAAA-----ATTGTAGGAACA-----

-----  
ATTGATAACACGGATTCC---  
TATTTCTCAATTCTATTTCGACGATGAAGAGAATTGGATGAATCCCGTGAAAGCATTTCAGAGAAGTTTCATTGATATCTGC  
TTTTTATAAAGCAAATAGACTTCGATTCTTGAATAATCCACATCGGTTCTCCTTCTATTGTAACAAAATCTTCCCTTTTG  
TTGTG-----GAAAAAGCTCGTTTCAAGAATTCTGATTTTTTG-----TATGGACAATTCCTTAAG-----  
-----ACTTTCTTCATTTCGCAAGAAACCATTTTCTTTGTGCGGC-----  
GAAAAACATGCTTTTGGG---GAGAGAGCTACTCTTTTA-----  
CCAATCGAGTCAGAGGTATCTAAGATACTCATACTCAGGTATCTAAGATACTCATACTGACGATTTT-----  
CCACAAAGT---GGTGACGAAAGGTATAACTTG-----  
TGCAAATCTTTCCATTTCCCAACTCGATCTGTTCCATTAGTTGAT-----  
AGAGCCCTTTACTCGATCGCCGACATTTCTGAAAGACCTCTAACAGAGGGACAAAATGGTCAATTTGGAAAGAACTTCTTT  
TCAACCTCTTTCA-----GATATTCATTTATCTGATTTCAGAAAGGAAGAAGTTGCAT---CAAGATCTCAAT-----  
TTCAATTCAAACATGGGTTTGATTACACTCCATATTCTGAAAAAGATTTACCGTCCGAAAAGAGG-----  
-----  
AAAAAACGG-----  
AATCTTGGTCGAAATCTAAAG-----  
AAATGCGTTGAGAAAGGGCAGATGTTTCGAACTCTTCTCTCGAAGATGTATCGAACCTT-----  
-----CTCTCAAATGGAAT---CTCTTCCAAACATAT---  
ATGCCATGGTTCCTTACTTCAACAGGGTACAAATATCTAACTTTGCTATTTTTTAGATCTTTTT---TCAGAC---  
CTAGTGCCGATA---CTC-----  
-----  
-----AGTCTAGGTATCCGT-----  
CAAATTGTGTATCCCTTTTTGATCATATTCTGGGTGATATTAGGGATGATATTAGGCAGGGGGTCATTAGACCGTGGCA  
AATTCTTCAGGAAAA---TGGGT---CTTCCACAA-----  
-----AGGAACCGGATA-----AGGGAGATT-----  
-----TCGAGGATGTGTTTACGAAAT-----CTTACTCTGTCTGCA-----GAAAGGATTCGTCGA--  
----AATAATGAGTCA-----  
CCATTGACACATACACTCTGAGATCACCCAATGTTCTGGAGTTTCTTCTATTCAACCCTTTTACTTCTTCTTGTGCTGG  
ATATCTCGTTTGTACATATCTTTCCCGTCTTTCC-----  
AAAGACTATGGTGAGTTACAGACAGAGCTCAAAAAGGTCAAATCTTTGATGATTCCATCATAACGATTGAGTTGCGAAA  
ACTGATGGATAGGTATCCTCCA-----TCT-----  
GAACTGAATTCTTTC-----  
-----  
-----GGATTAAGAATCTCTTTCTAGTTGCTATGGAAGAACTAAAGGAGTCTCTT-----  
-----TCTGTAGTCGGCAACATGCTAGAGGGTGGTGGTCGC-----GCTTATGGGGTCGAAGCAATCTTTTTCT-----  
-----  
AATTGGAATCTCAATCTCATCGATATCAGCGATCTTATCAGTCTCATAACCAAATCCCATCGATCGAATCACTTTTTTCGAT  
AAATACGAGACATCTAAGTCATACAAGTAAAGAGATCTATTCAATCATAAGA-----  
-----AAAAGAGAA---AGGGTGTAT-----GGTGCT-----  
TGGATTGATGATAAAATAGAATCCTTGCTCTCGACCTCTGTGGCTATTGATGATTGCGACAGAGGCAACTTGCTTCAGTT  
CTCCACCCTCACCTTAACGACAGAAAAGGGGTTGATCAAATCTGTTGAGTCTGACTCAGAGT-----TCA-----  
-----  
AAGAATGCCTCTGGTTCTCAAATGATTGAACAACCGGGAGAAATGTACTTACGACACGTAGTTGACCTTCAGAAGAAGTA  
TCTAATGGGTTATGAGTTCAATACATCCTCTTTAGCAGAAAGACGGATATTCCTTGCTCATTATCAGACAATGACTTATT  
CAAAAACCTCGTGTGGGTTAATGCTTTTTCAATTTCCCATCT---  
CATGAAAAACCCTTTTCGCTCCGCTTAGACCTATCCCCCCT---  
AGGGGTATTTTGTAGTATAGTTCTATAGGAACTGGACGATCCTATTTGATCAAATCCCTAGCGAAAAAT---  
ACCCACTTTCCCTTATTACGTTA-----  
GAGATGGAAGCGCGCTCCTCCTGGCCTTTTTTCCAGCATTGGATGAGATCTATGGTGACCAGCTGGAGTATGTGTATGA  
CGATACTAGTCTTAGTGTGGAGGTGGAGGAAGAGGAGGA  
Phalaenopsis CAAGATACCGTCTCAATTCATCCT-----TCGGAACCA-----  
-----  
TATCACATCCCGGATCTGGTTCCGAAGGATGAACCGGATATGGACAGTTCCAATAAGATTTTCATTCTTGAACAAAAATCC  
ATTTTTTGATTTCTTTCATCTATTCCATGACCGGAACAAAGGGGATAACGCGTTA-----  
CGCCACGATTTTTTTGAATCA-----  
GAAGAGAGATTCCAGAAATGGCGGATCTATTCACTCTATCAATAACCGAGCCGGATCTGGTGTTCATAGGGGATTTGC



CTTTTATATTGATTCC-----  
TACGGGTTGGATCAAAAAAGATTCTTGAATGAGGTATTCAACTCCAGAGATGAATCGAAAAAGAAA-----TTG-----  
-----  
GTTCTACCTCCTCTTTTTTATGAGGAGAATGAATCTTTTTCTCGAAGGATCAGAAAAAATCGGTCCGGATCTACTGCGG  
GAATGAGTTGGAAGATCCCAAACATAA---  
ACAGCGGTATTTGCTAGCAACAACATAATGGAGGCAGTCAATCAATATAGATTGATCCGAAATCTC-----CAA--  
-----TAT-----  
TATGGGTACATAAGAAATGTATCGAATCGATTCTTTTTAATGAATAGATCCGATCGCAACTTCGAATATGGAATTCAA--  
-----AGGGATCAAATAGGAAATGATACTCTGAATCATATAACTATAATGAAATATACGATCAACCAACATTTATCGAAT--  
-----TTGAAA---AAGAGTCAGAAGAAATGGTTTGATCCTCTTATT-----  
TCTCGAACTGAGAGATCCATGAATCAGGATCCTGATGCATATAGATACAAAGGGTCCGATGGGAGCAAGAATTTCCAGGA  
ACATTTGGAACATTTTCGTTTCTGAACAGAAGAATCCTTTTCAAGTAGTGCAAGTA-----  
GTGTTTCGAT-----CAA-----TTACGTATTCAT--  
-----CAATATTCGATTGATTGGTCCGAGGTTATCGACAAAGAAGAT-----  
-----TTGTCTAAGTCACTTCGTTTCTTTTTGTCC---AAGTCACTTCTC---  
TTTTTGTCCAAGTCACTTCGT-----  
-----TTCTTTTTGTCCAAGTCACTTCCC---TTTTTCTTTGTGAGTATCGGGAATATCCCC---  
ATTCATAGGTCCGAGATCCGCATCTATGAA---  
TTGAAAGGTCCGAATGATCAACTCTGCAATCAGTTGTTAGAATCCATAGGTGTTCAAATCGTTCATTTGAAGAAATTGAA  
ACCCTTCTTATTG-----  
GATGATCATGATACTTCCCAAAGACCAAATTTCTTGATCAATGGAGGAACAATATTACCATTTTTGTTCAAAAAGATAACC  
A---AAGCGGGTG---ATTGACTCATTCCATACTAGAAAGAATCGCAGGAAATCCTTTGATAACACGGATTCC---  
TATTTCTCAATGATATCCCACGATCGAGACAATTGGCTGAATCCCGTGAAAGCATTTCATAGAAGTTCATTGATATCTTC  
TTTTTATAAAGCAAATCGACTTCGATTCTTGAATGATCCACATCACTTCTGGTTCTATTGTAACAAAAGATTCCCCTTTG  
ATGTG-----GAAAAGACCCGTATCAATAATTATGATCTTACA-----TATGGACAATTCCTCAAT-----  
-----ATCTTGTCCATTTCGCAACAAAATCTTTTCTTTGTGCGTCCGT-----  
AAAAAAGGATCTCTTTTTTTG---GAGAGAGAGACTCTTTCA-----  
CCAATCGAGTCACAGGTATCTGACATCTTCATACCT-----AACGATTTTC-----  
CCACAAAGT---GGTGATGAAACGTATAACTTG---  
TACAAATTGTACAAATCTTTCCATTTTCCAATTCGATCCGATCCATTTCGTTTCGT-----  
GGAGCTATTTACTCGATCGCAGACATTTCTGCAACACCTCTAACAGAGGAACAAATAGTCAATTTGGAAAAAATTATTG  
TCAGCCTCTTTCA-----GATATGAATCTATCTGATTGAGAAGGGAATAAATTACAT---CAGTATCTCAGT-----  
TTCAATTCAAACATGGGTTTGAATTCACACTCCATGTTCTGAGAAGTATTTACCATCCGAAAGAGG-----  
-----  
-----  
AAAAAACGG-----AGTCTTTGT-----  
CTAAAG-----AAATGCGTTGAGAAAGGGCAG-----ATGTATAGAACCTTTCAA---  
CGAGATAGTGCTTTTTCAAATCTCTCAAATGGAAT---CTGTTCCAAACATAT---  
ATGCCATGGTTCTTACTTCGACAGGGTGCAAATATCTCAATTTACCCTTTTAGATACTCTT---TCAAAC---  
CCATTGCCGATA---CTG-----  
-----AGT-----AGTAGT-----CAAAAATTTGTATCCATTTTT---  
-----CATGATATGATGCATGGATCAGATATATCATGGCCAATTCCTCAG-----  
---AAGATTCTTCCACAA-----  
TGGACTCTGATA---AGTGAGATT-----  
TCGAGTCAATGTTTACAGAAT-----CTTCTTCTGTCCGAA-----GAAATGATTCATCGA-----  
AATAATGAGTCACCCGTTCCATTGATATGGGCACATCTGAGATCAACAAATGCTCGGGAGTTTCTTATTCCATCTTTTT  
CCTTCTTCTTGTGCTGGATATCTCGTTTCGTATACATCTTCTCTTTGTTTC-----  
CGAGCCTCTAGTGAGTTACAGACAGAGTTAGAAAAGATCAAATCTTTGATGATTCCATCATAACATGATGGAATTTGAAA  
ACTTCTGGATAGGTATCCTACA-----TCT-----  
GAACTGAATCCTTTC-----  
-----  
TGGTTAAAGAATCTCTTTCTAGTTGTTCTGGAACAATTAGGAGATTCTCTGGGAGAAATACGGGGTTCTGCTTCTGGTGG  
CAACATGCTATTGGGTGGTGGTCCC-----  
GCTTATGGGGTCAAATCAATACGTTCTAAGAAGAAATATTGGAAGATCAATCTC-----  
ATCGATCTTGTAAAGTATCATACCAAATCCCATCAATCGAATCATTTTTTTCGAGAAATACGAGACATCTAAGTCGTACAAG

TAAAGAGATCTATTTCATTGATAAGA-----  
AAAAGAAA---AACGTGAAC-----GGTGAT-----  
TGGATTGATGATAAAATAGAATTCTGGGTCGCGAACAGTGATTGATTGATGATGAAGAAAGAGAATTCTTGGTTCAGTT  
CTCCGCC-----TTAACGACAGAAAAAGGATTGATCAAATTCATTGAGTCTGACTCATAGTGATCATTATCA----  
-----  
AAGAATGACTCTGGTTATCAAATGATTGAACAACCGGGATCAATTTTCCTTACGATACTTAGTTGACATTCATCAAAAGGA  
TCTAATGAATTATGAGTTCAATAGATCCTGTTTAGCAGAAAGACGGATATTCCTTGCTCATTATCATAACAATCACTTATT  
CACAAACCTTGTGTGGGGCTAATATTTTTCATTCCCCATCTCCTCATGGAAAACCCCTTTTCGCTCCGCTTAGCCCTATCC  
CCTTCT---AGAGGTATTTTAGTGATAGGTTCTATAGGAAGTGGACGATCCTGTTTGGTCAAATATCTAGCGACAAAC---  
-TCCTATGTTTCCTTTTCATTACGGTATTTCCGAACAAGTTCCTGGATGAC---  
AAGCCTAAAGGTTATCCTATTGATGATATCGATATTGATGATAGTGACGATATTGATGATAGTAATGAT-----  
-----  
Pinus           GAAATT-----  
GAAATCCTTCCTTGAATTGTGCTATGCGGAGTTTTACTCTGCCTTGGAA-----  
-----  
CTATTTTCTGCATTCTGTGATCAAAGCAAAGGAAAATACATATTG-----CACAAAAAT-----  
-----TGTCTGGAAATGACAGATCAATTCCTCTATCAATAACTAAGCCTAGTCAGGTT---  
CATGATAAAATTTTCAATTTTTTATTTAT---TATAACAAGAATGGATCGTTGAGATCGGATCGGATC-----  
-----TTCAATCACAGAGAAAAATGGAAGAATCAATCTTTATGG-----  
GTCCTACTCAATATTATTGATAAAGCGGATGATTATTTAGATCAAATAATCGACAAACAATTGAGCCAAATCGATTCCAA  
AAATTGCTTGGAGATAGGAAGTCCCTTT-----  
AACAAATTATAGAAGTGAAGCTTTGGGTTGGTATGAATCAATTAAGTATAACATTGACAAC-----  
-----  
AGGTATTCGAAAAATTTATTAATAGATTCTATTTTATAAATAGGCTCAGTCGCAATTTAAAGGATCAAATTAGA-----  
-ACAAATTTTATAGAAAATGAAAATTTAAAT-----AATGTAACGAAAGATACAATTGACCGGCATTTCATCAAGT-----  
--TGGAAA---AAAATTAAGAGAGAATGGTTCAACCATTCTATT-----  
ATTGCAATTGATAAACATATCAATCGGAATTTG-----  
AATGTGTACAAATGGTCCAATCAGACCGAATACTTTATGAAATATTTGAAACAG---  
GTTTTTCTAAAAAAACTATTTT-----AAAATA-----GTGTTTCGAT-----  
-----  
CCAATTGAATTATGTACTAATACTAATCGAGATTCAATTGGTTGGTCTGTGTTT-----  
TTATCCCTTTCTGAAAGTACTGTAAAGATCTTAAACTCGAAGTTCGATATCATTTCGAAGTAAAT-----  
-----  
TCTAAGTTCGATATTTTAATTTTCGTTTTTTGATTTTGCATTTTCATGGGCTC-----  
-----  
--  
CAAAGTATGAATTATAGACTATTAATCAGTTGTTAGATCCAATTGGTACTCTAATCGTTTCGTTTAAAAAAATTTAAAC  
CTTTCTTTTG-----  
TATGACCATAATCTTTCACAAAGATCGAAATTATTGATTGATGAAGGAACAATTGCACCATTTGTTACGAATAAGATACC  
AATTAATCCATTGATTATTGACTTTTTTCGATAATGAAAATAATCGCATGGAATCATTTCGATAACACT-----  
TATTTTTTCGACGATATCCAACGATCGAGACAATTGGTTGAATCCTGTGAAACTATCTGATCAGAGCTCATTGATAGCTTC  
TTTTACGGAGCAAATACGCTCCAATTTTTTATTGATTATTTGCATCATACTCGGCCAAATTATAGGAATAGATTACCTTCTG  
ATATG-----AAAAGATTTTATATAAAAAGGAATAATTTTACA-----TATGGACAATTATTCAAT-----  
-----CTTTTGATCATCCACAACAATCTATCTTCCTTGCCATTGGT-----  
GAAATAGGACCCGTTCACTCA---GAAAAAGAGACTATTTCA-----  
TTCATCAAATCACAAGTATCTAACATATTATTACCT-----  
AAATATTTAAAAACGAAAACGAAGT---  
GGTGACCAAACGTTTGTATTAATCTATGATTTGTACAGATCCTTCAATTTACTAACTCGATTGAATCCATTTCGTTTCGTGA  
AAAGAGATATCTTTCTTCGATCGAAGAGATTTCTACAACGCCTTTAACAAAAGAACAATAGTCAATTTTGAAAAAAT  
TTTGCCAACCTTTTTTT-----AAAAGATCCGATTTCAGAAGAAAACAACCTTTGAT---  
CAATGCTTTAAAGGGGTTTCAGTTCAAACGTGGGTCTTATTCAAACCTCGATCTTATCAAGATGATTTACTATCCGAAAT  
G---  
TTTTCCAATAAGAACGAGGAAATTTTTCTCGTATTCAAGATTGGTTTGTAACCGAATGTTTAAAAAACAAAATAGTAA  
CGAAGACATAGATGGAAGGAGTACCCTTTCTAATTCATCTAAAGAGGAACAGAAT-----  
-----  
ATTTATAGGATCTCTCAA---ATAGATAGT-----ATTTTTTCAAATGGGAT---TTGTTCAAACATAT---

ATGCCCTGGTTTTTTTACCTCTGCATGGTGTAATATATTGAAAATATGCTTTTAGATACTCTT---TCGGAG---  
ATATTACTACAT-----  
-----GGCAGT-----AATCCATTTGTATCTATTTTG---  
-----CAAAATATTAAGCATAATATTTTGCTTAAACGGAATATA-----  
TTGTGG-----GAACTTTCTCATCCATTA-----  
TGGGAACCTATACAATGTAAATTGAGAACGAATCTTATT-----  
AATAAGTTTTTTTTTCCAAGTAATAATTTCAAGGATTTTTCCCTTACTGCAAGGAT-----  
-----TTTTTAATAGAG-----GAACTAGTGATCGAGAG-----  
AAGTCATCAGTTCCATTTCATATGGGCACATATGAGATTACTAAATGCTCGGGGTATAAATATGGGATTCTTATCCCTTT  
TTTTCGTTCTTGGGTATTCTATTCTTCAATATTTTAAAGTTATTTCT-----  
TTCACCTTTATCAATATAAAGAGATACTTTGAACTCATCAAGTATTTAAAGCATCCATCATACTGATAGAGTTGCAAAA  
AATGATT-----AATCCTCCC-----GTGCCTAATAGCTTTCTC-----  
-----  
TATTATACAATAGACAGAGACAGATCCAGTTCTCTTCCACAGATTATTAATAGTTTTTTTTTCTATGAATATGAAGAGGAA  
GAGGAAGACGAAGAGGAAGACGAAGAATAGAAATATAAAATTGCTTATAACTATAATAAGAGAGTTGAACGGATTGTGCT  
CT-----  
-----  
-----AGTATGGATATCTCCGAAAAAGAGATGAACTTACTAGTTCAGTTT-----  
CTAATGACGGAAAAAGCCCTTTTTTAAATTTGAATCAATTTTTACTTACAGTCCTAATTTATTC-----  
AAGAATGAATTTGGAGATCAAATCATTAGACAGCCAGGGCTTATTCACCTACGATATTTGGCCTACACTTATCAAAAAGG  
TCTAATTAATTACGGGTTCAATCCATTTTGTTTAGCAGAAAGATGGGTATTCTTGTCTTTTGTGTCAGAAGATTACCTCTT  
CACAAATATTGTGTCAAACCAAC-----CCCACATTT---  
CATGGAACCTTTCTCACTCCACTCAGGATCATTACTTTCC---  
AAAGGGATTTTACTGATAGGTCCTATGGGAACCTGGCCGATCCTATTTGGTCAAAGTCTAGCAGCAGAC---  
TCATATGTTCCTTTAAATAAGAATATCTCTGAAGAAGCTCTGGTATGGT---  
GAGTATTTAGATTACCCTCTTGAACGTATTCTACTGAGTTTGTATCCTTTTGTGAAAGACAAAATGGAAGATTTCCATAT  
T-----  
Piper CAAAATACCGTCTCAATTCATCTATTTTCATCAGATCCGGGATGT-----  
-----  
GATATGGTTCGGAAGGATGAACCAGATATAGACAGTTCCCATAAAGATTTTCATTCTTGAATAAAAATCCATTTTTGGATTT  
ATTTTCATCTATTCCATGACCGGAACAAAGGGGATAACAGTTA-----CACCACGATTTT---GAATCA-----  
GAAGAGAGATTTCAAGAAATGGCAGATCTATTCATCTATCAATAACCGAGGCGGGTCTGGTATATCATAAGGGATTTAC  
CTTTTCTATTGATTCC-----  
TACGGATTGGATCAAAAAAATTTCTTGAATGAGGTATTCAACTCCAGGGATGAATCGAAAAAGAAATCTTTATGG-----  
-----  
TTTTCTACCTCCTATTTTTGATGAAGAGAATGAATCTTTTTACGGAAGGATCAGAAAAAATCGGCCCGGATCTCCTGCGG  
CAATGATTTGGAAGATCCAAACCCCAAA---  
ATAGTGGTATTTTCTAGCAACAACATAATGGGGGCGGTCAATCAATATAGATTGATCCGAAATCTGATTCAAATCCAA--  
----TATCGCACC-----  
TATGAGTACATAAGAAATGTATCGAATCGATTCTTTTTAATGAATCGACCCGATCGCAACTTCGAATATGGAATTCAA--  
----GGGGATCCAATAGGAAATGATACTCTGAATCATCTAACTATAATCAAACATACGATCAACCAACATTTATCGAAT--  
----TTGAAA---AAGAGTCAGAAGAAATGGTTCGATCCTCTTATT-----  
TCTCGAACCGAGAGATGCATGAATCGGGATCCTGATGCATATAGATACAAATGGTCCAATGGGAGCAAGAATTTCCAGGA  
ACATTTGGAACATTTCTGTTTCTGAACAGAAGCACCCTTTT-----CAAGTA-----  
GTGTTCCGGT-----CGA-----TTACGTATTAAT--  
----CAATATTCGATTGATTGGTCCGAGGTTATCGACAAACAAGAT-----  
-----TTGTCTAAGTCACTTCGTTTCTTTTTGTCC---AAGTCACTTCTC---  
TTTTTGTCTAAGTCACTTCGT-----  
----TTCTTTTTGTCTAAGTCACTCCCT---TTTTTCTTTGTGAGTATCGGGAATATCCCC---  
ATTCATAGGTTTCGAGATCCACATCTATGAA---  
TTGAAAGGTCCGAATGATCAACTCTGCAATCCGTTGTTAGAATCAATAGGTGTTCAAATCGTTCAATTTGAATAAATTGAA  
ACCCTTTTTTATTG-----  
GATGATCATGATATTTCCCAAAGATCGAAATTTCTGATCAATGGAGGAACAATATCACCTTTTTTGTTCATAAAGATACC

A---AAGTGGATG---ATTGACTCATTCCATACTAGAAAGAATCGCAGGAAATCCTTTGATAACACGGATTCC---  
TATTTCTCAATGATATCCCACGATCGAGACAATTGGCTGAATCCCGTGAAACCATTTTCATAGAAGTTCATCGATATCTTC  
TTTTTATAAAGCAAATCGACTTCGATTCTTGAATAATCCGCATCACTTATGGTTCTATTGTAACAAAAGATTCCCTTTTG  
ATGTG-----GAAAAGGCCCGTATCAATAATTATGATCTTACA-----TATGGACAATTCCTCAAT-----  
-----GTCTTGTTTCATTTCGCAACAAAATATTTTCTTTGTGCGTCAGA-----  
AAAAAAAAACATGTTTTTGGG---GGGAGAGATGCTATTTCA-----  
CCAATCGAGTCACAGGTATCTGACATATTCATACCT-----AACGATTTT-----  
CCACAAAGT---GGTGACGAAACGTATAACTTG-----  
TACAAATCTTTCCATTTTCCAATTCGATCCGATTTCATTGTTTCGT-----  
AGAGCTATTTACTCGATTGCAGACATTTCTGGAACACCTCTAACAGAGGAACAAATAGTCCATTTTCAAAGAACTTATTG  
TCAGCCTCTTTCA-----GATATGAATCTATCTGATTGAGAAGGGAAGAAGTTCAT---CAGTATCTCCGT-----  
TTCAATTCAAACATGGGTTTGATTACACTCTATGTTCTGAGAAAGATTTCCCATCCGGAAGAGG-----  
-----  
-----  
AAAAAACGG-----ACTCTTTGT-----  
CTAAAG-----AAATGCGTTGAGAAATGGCAG-----ATGTATAGAACCTTTCAA---  
CGAGATAATGATTTTTCAAATCTCTCAAATGGAAT---CTGTTCCAAACATAT---  
ATGCCATGGTTCCTTACTTCGACAGGGTGCAAATATCTAAATTTACCCTTTTGTAGATACTTTT---TCAGAC---  
CCATTGCCGATA---CTA-----  
-----  
-----AGT-----AACAGT-----CCAAAATTTGTATCCATTTTT---  
-----CATGATATTATGCATGGATCAGATATATCATGGCCAATTCCTCAGCAAAAA-----  
GGGCGGGCGATTCTTCCACAA-----  
AGGAATTGGATA-----AGTGAGATG-----  
TCGAGTAAGTGTTTACAGAAT-----CTTCTTCTGTACGAA-----GAAATCATTTCATCGA-----  
AATAATGAGTCACCCGCTCTATTAATATGGACACATCTGAGATCACCAAATGCTCGGGAGTTACTCTATTCAATCCTTTT  
CCTTCTTCTTGTGCTGGATATCTCGTTTCGTACACATCTTCTCTTTGTTTCC-----  
CGAGCCTCTAGTGAGTTACAGACAGAGTTAGAAAAGATCAAATCTTTAATGATTCCATCATAATGATGGAGTTGCGAAA  
ACTTCTGGATAGGTATCCTACA-----CCT-----  
GAACTGAATTCCTTC-----  
-----  
-----  
TGGTTAAAGAATCTCTTTCTAGTTGCTCTGGAACAATTAGGAGATTCTCTGGAAGAAATACGCGGTTCTGCTTCTGGCGG  
CAACATACTATTGGGTGGTGGTCCC-----  
GCTTATGGGGTCAAATCAATACGTTCTAAGAAGAAATATTTGAATATCAATCTCATCGATATCATTGATTTTCATAAGTAT  
CATACCAAATCCCATCAATCGAATCACTTTTTTCGAGAAATACGAGACATCTAAGTCATACAAGTAAAGAGATCTATTCAT  
TGATAAGA-----  
AAAAGAAAAAAAACGTGAAC-----GGTGGT-----  
TGGATTGATGAAAAAATCGAATCCTGGGTGCGGAACAGTGATTGATTGATGATGAAGAAAGAGAATTCTTGGTTCAGTT  
CTCCACC-----TTAACGACAGAAAAAGGATTGATCAAATCTATTGAGTCTGACTCATAGTGATCATTTTATCA----  
-----  
AGAATGACTCTGGTTATCAAATGATTGAACAACCGGGATCAATTTACTTACGATACTTAGTTGACATTCATAAAAAGTA  
TCTAATGAATTATGAGTTCAATAGATCCTGTTTAGCAGAAAGACGGATATTCCTTGCTCATTATCAGACAATCACTTATT  
CACAAACCTCGTGTGGGACTAATAGTTCTCATTTCATCT---  
CATGGAAAACCCTTTTCGCTCCGCTTAGCCCTATCCCCTTCT---  
AGGGGTATTTTAGTGATAGTTCTATAGGAACCTGGACGGTCAATTTGGTCAAATACCTAGCGACAAAC---  
TCCTATGTTCCCTTTTCATTACGGTATTTCCGAACAAGTTCTTGGATGAC---  
AAGCCTAAAGGTTCTCTTTTTGATAATATCGATATTGATGATAGTGACGATATCGATATTGATGATAGTGACGATATCGA  
TATTGATGATAGTGACAATATT-----  
Platanus CAAAATACCGTCTCAATTCATCTATTTTCATCAGATCCGGGATGT-----  
-----  
GATATGGTTCGGAAGGATGAACCGGATATGGACAGTTCCAATAAGATTTTCATTCTTGAACAAAATCAATTTTTTTGATTT  
ATTTTCATCTATTCCATGACCGGAACAGGGGGGATATACGTTA-----CACCACGATTTT---GAATCA-----  
GAGGAGAGATTTCAAGAAATGGTAGATCTATTCATCTATCAATAACCGAGCCGGATCTGGTGTATCATAAGGGATTTGC  
CTTTTCTATTGATTCC-----  
TACGGATTGGATCAAAAAAATCTTGAATGAGGTATTCAACTCCAGGGATGAATCGAAAAAGAAATCTTTATTG-----  
-----

GTTCTACCTCCTATTTTTTATGAAGAGAATGAATCTTTTTATCGAAGGATCAGAAAAAATCGGTCCGGATCTCCTGCGG  
GAATGATTTGGAAGATCCAAAACCAAAA---  
AGAGTGGTATTTGCTAGCAACAACATAATGGAGGCAGTCAATCAAGATAGATTGATCCGAAATCTGATTCAAATCCAA--  
----TATAGCACC-----  
TATCGATACATAAGAAATGTATCGAATCGATTCTTTTTAATGAATAGATCCGATCGCAACTTCGAATATGGAATTCAA--  
----AGGGATCAAATAGGAACTGATACTCTGAATCATAGAACTATAATGAAATATACGATCAACCAACATTTTATCGAAT--  
-----TTGAAA---AAGAGTCAGAAGAAATGGTTTCGATCCTCTTATT-----  
TCTCGAACCGAGAGATCCATGAATCGGGATCCTGATGCATATAGATACAAATGGTCCAATGGGAGCAAGAATTTCCAGGA  
ACATTTGGAACATTTTCGTTTCTGAGCAGAAGAGCCGTTTT-----CAAGTA-----  
GTGTTTCGAT-----CGA-----TTACGTATTAAT--  
----CAATATTCGATTGATTGGTCCGAGGTTATCGACAAACAAGAT-----  
-----TTGTCTAAGTCACTTCGTTTCTTTTTGTCC---AAGTCACTTCTC---  
TTTTTGTCCTCAAGTCACTT-----  
----CTCTTTTTGTCTAAGTCACTTCTCT---TTTTCTTTGTGAGTTTCGGGAATATCCCC---  
ATTCATAGGTCCGAGATCCACATCTATGAA---  
TTGAAAGGTCCGAATGATCAACTCTGCAATCAGTTGTTAGAATCAATAGGTGTTCAAATCGTTCATTTGAATAAATTGAA  
ACCCTTCTTATTG-----  
GCTGATCATGATACTTCCCAAAAATCGAAATCTTGATCAATGGAGGAACAATATCACCATTTTTGTTCATAAAGATATC  
A---AAGTGGATG---ATTGACTCATTCCATACTAGAAATAATCGCAGGAAATCCTTTGATAACACTGATTCC---  
TATTTCTCAATGATATCCCACGATCGAGACAATTGGCTGAATCCCGTGAAACCCTTTTCATAGAAGTTCATTGATATCTTC  
TTTTTATAAAGCAAATCGACTTCGATTCTTGAATAATCCACATCACTTCTGGTTCTATTGTAACAAAAGATTCCCTTTTT  
ATGTG-----GAAAAGGCCCGTATCAATAATTATGATCTTACG-----TATGGACAATTCCTCAAT-----  
-----ATCTTGTTTCATTTCGCAACAAAATATTTTTCTTTGTGCGTCCGGT-----  
AAAAAAAAACATGCTTTTTTTG---GAGAGAGATACTATTTCA-----  
CCAATCGAGTCACAGGTATCTAACATATTCATACCT-----AACGATTTT-----  
CCACAAAGT---GGTGATGAAACGTATAACTTG-----  
TACAAATCTTTCCATTTTCCAATTCGATCCGATCCATTCTGTTCTG---  
AGAGCTATTTACTCGATCGCAGACATTTCTGGAACACCTCTAACAGAGGGGCAAATAGTCAATTTTGAAAGAACTTATTG  
TCAACCTCTTTCA-----GATATGAATCTATCTGATTGAGAAGGGAAGAAGTGGAT---CAGTATCTCAAT-----  
TTCAATTCAAACATGGGTTTGATTACACTCTATGTTCTGAGAAATCTTTACCATCCGAAAAGAGG-----  
-----  
-----  
AAAAAACGG-----AGTCTTTGT-----  
CTAAAG-----AAATGCGTTGAGAAACGGCAG-----ATGTATAGAACCTTTTCAA---  
CGAGATAGTGCTTTTTTCAAATCTCTCAAAATGGAAT---CTGTTCCAAACATAT---  
ATGCCATGGTTCTTACTTCGACAGGGTGCAAATATCTAAATTTACCCTTTTGTAGATACTTTT---TCAGAC---  
CTATTGCCGATA---CTA-----  
-----  
-----AGT-----AGCAGT-----CAAAAATTTGTATCCATTTTT---  
-----CATGATATTATGCATGGATCAGATATCTCATGGCCAATTCCTCAGAAAAAA-----  
TGGTGT-----CTTCCACAA-----  
TGGAATCTGATA-----AGTGAGATT-----  
TCGAGTAAGTGTTTACATAAT-----CTTCTTCTGTCCGAA-----GAAATGATTCATCGA-----  
AATAATGAGTCACCCGTTCCATTGATATGGACACATCTGAGATCACCAAATGCTCGGGAGTTTCTGTATTCAATCCTTTT  
CCTTCTTCTTGTGCTGGATATCTCGTTTCGTACACATCTTCTCTTTGTTTCC-----  
CGAGCCTCTAGTGAGTTACACACAGAGTTCGAAAAGATCAAATCTTTGATGATTCCATCATACATGATTGAGTTGCGAAA  
ACTTCTGGATAGGTATCCTACA-----TCT-----  
GAACTGAATTCCTTC-----  
-----  
-----  
TGGTTAAAGAATCTCTTTCTAGTTGCTCTGCAACAATTAGGAGATTCTCTAGAAGAAATACGGGGTTCTGCTTCTGGCGG  
CAACATGCTATTGGGTGGTGGTCCC-----  
GCTTATGGGGTCAAATCAATACGTTCTAAGAAGAAATATTTGAATATCAATCTCATCGATATCATCGATCTCATAAGTAT  
CATACCAAATCCCATCAATCGAATCACTTTTTTCGAGAAATACGAGACATCTAAGTCGTACAAGTAAAGAGATCTATTCA  
TGATAAGA-----AAAAGAAA---  
AACGTGAAC-----GGTGAT-----  
TGGATTGATGATAAAATAGAATCCTGGGTCGCGAACAGTGATTGATTGATGATGAAGAAAGAGAATTCCTGGTTTCAGTT

CTCCACC-----TTAACGACAGAAAAAAGGATGGATCAAATTCTATTGAGTCTGACTCATAGTGATAATTTATCA-----  
-----

AAGAATGACTCTGGTTATCAAATGATTGAACAACCGGGATCAATTTACTTACGATACTTAGTTGATATTCATAAAAAGTA  
TCTAATGAATTATGAGTTCAATAGATCCTGTTTAGCAGAAAGACGGATATTCCTTGCTCATTATCAGACAATCACTTATT  
CACAAACCTCGTGTGGGGCTAATAGTTTTTTATTTCCCATCT---  
CATGGAAAACCCTTTTTCGCTCCGCTTAGCCCTATCCCCCTCT---  
AGGGGTATTTTAGTGATAGGTTCTATAGGAACTGGACGATCATATTTGGTCAAATACCTAGCGACAAAC---  
TCCTATGTTCCTTTCATTACGGTATTTCCGAACAAGTTCCTGGATGAC---  
AAGCCTAAAGGTTATCTTATTGATGATATCGATATTGATGATAGTGACGATATTGATGATAGTGACGATATC-----  
-----

Populus CAAAATACCGTCTCAATTCATCTATTTTCATCAGATCCGGGATGT-----  
-----

GATATGGTTCTGAAGGATGAACCTGGATATGGACAGTTCCAATAAGATTTCTTTCTTGAACAAAAATCCATTTTTTTGATTT  
ATTTTCATCTATTCCATGATCGAAACGGGGGGGATAACAGTTA-----CACCACGATTTT---GAATCA-----  
GAAGAGAGATTTCAAGAAATGGCGGATCTATTTACTCTATCAATAACCGAGCCGGATCTGGTGTATCATAAGGGATTTGC  
CTTTTTTATTGATTCC-----  
TACGGATTGGATCAAAAACAATTCTTGAATGAGGTATTCAACTCCAGGGATGAATCGAAAAAGAAATCTTTATTG-----  
-----

GTTCTACCTCCTATTTTTTATGAAGAGAATGAATCTTTTTATCGAAGGATCAGAAAAAATGGGTCCGGATCTCCTGCGG  
GAATGATTTGGAAGATCCAAAACAAAA---  
AGAGTGGTATTTGCTAGCAACAACATAATGGAGGCAGTCAATCAATATGGATTGATCCGAAATCTGATTCAAATCCAA--  
----TATAGCACC-----  
TATGGGTACATAAGAAATGTATTGAATCAATTCTTTTTAATGAATAGATCCGATCGCAACTTCGAATATGGAATTCAA--  
----AAGGATCAAATAGGAAATGATACTCTGAATCATAGAACTCTAATGAAATATACGATCAACCAACATTTATCGAAT-  
-----TTGAAA---

CAGAGTCAGAAGAAATGGTTCGATCCTCTTATTTTTCTTTCTCGAACCGAGAGATCCATGAATTGGGATCCTAATTCATA  
TAGATACAAATGGTCTAATGGGAGCAATAATTTCCAGGAACAT-----  
TTCATTTCTGAGCAGAAGAGCCGTTTTCTTTTT---CAAGTA-----GTGTTTCGAT-----  
-----CGA-----TTACGTATTAAT-----

CAATATTCGATTGATTGGTCTGAGGTTATCGACAAAAAAGAT-----  
-----TTGTCTAAGTCACTTCCCTTTCTTTTTGTCC---AAGTTACTTCTT---  
TTTTTGTCCTAAGTTTATT-----  
----CTCTTTTTGTCTAACTCACTTCTCT---TTTTCTTTGTGAGTTTCGGGAATATCCCC---

ATTCATAGGTCCGAGATCCATATCTATGAG---  
TTGAAAGGTCCGAATGATCAACTCTGCAATCAGCTGTTAGAACCAATAGGTCTTCAAATCGTTTCAATTTGAAAAAATGGAA  
ACCCTTTTTATTG-----  
GATGATCATGATACTTCCCAAAAATCGAAATTTTTGATCAATGGAGGAACAATATCACCATTTTTGTTCAATAAGATAACC  
A---AAGTGGATG---ATTGACTCATTCCATACTAGAAATAATCGCAGGAAATCTTTTGATAACACGGATTCC---  
TCTTTCTCAATGATATCCCACGATCAAGACAATTGGCTGAATCCCGTGAAACCATTTTCATAGAAGTTTCATTGATATCTTC  
TTTTTATAAAGCAAATCGACTTCGATTCTTGAATAATCTACATCATTTCTGCTTCTATTGTAACAAAAGATTCCCTTTTT  
ATGTG-----GAAAAGGCCCGTATCAAGAATTATGATTTTACG-----TATGGACAATTCCTCAAT-----  
-----ATCCTGTTTATTTCGCAACAAAATATTTTCTTTGTGCGGCGGT-----

AAAAAAAACATGCTTTTTTTG---GAGAGAGATACTATTTCA-----  
CCAATCGAGTCACAGGTATCTAACATATTCATACCT-----AATGATTTT-----  
CCACAAAGT---GGTGACGAA-----AGCTTG-----  
TACAAATCTTTCCATTTTCCAATTCGACCCGATCCATTCTGTTCTG-----  
AGAGCTATTTTATTTCTATCGCAGACGTTTTCTGGAACACCTCTAACAGAGGGACAAATATTCAATTTTGAAAGAACTTATTG  
TCAACCTCTTTTCG-----GATATTAATCTATCTGATTGAGGAAAGAACTTGCAT---CAGTATCTCAAT-----  
TTCAATTCAAACATGGGTTTGATTACACTCCATGTTCTGAGAAATATTTACCATCCGAAAAAAGG-----  
-----

AAAAAACGG-----AGTCTTTGT-----  
CTAAAG-----AAATGCGTTGAAAAGGGGCAG-----ATGTATAGAACCTTTCAA---  
GGAGATAGTGCTTTCTCAACTCTCTCTAAATGGAAT---CTATTCCAAACATAT---  
ATGCCATGGTTCCTTACTTCGACAGGGTACAAATATCTAAATTTGATATTTTTAGATACCTTT---  
TCAGACCACCTATTACCGATA---CTA-----  
-----

-----AGT-----AGCAGT-----  
CAAAAAATTGTATCCATTTTT-----  
CATGATATTATGCATGGATCAGATATATCATGGCGAATTCTTCAGAAAAAT-----TTGTGT-----CTTCCACAA--  
-----TGGAACTCGATA-----  
AGTGAGATT-----TCGAGTAAGTGTTTACATAAT--  
----CTTCTTCTGTCCGAA-----GAAATGATTCATCGA-----AATAATGAACCA-----  
CCATTGATATCGACACGGCTGAGATCGCCAAATGTTTCGGGAGTTCCTTTATTCAATCCTTTTCTTCTTCTTGTTCAGG  
ATATCTCGTTCGTACACATCTTCTCTTTGTTTCC-----  
CGAGCCTATAGTGAGTTACAGACAGAGTTCGAAAAGGTCAAATCTTTGATGATTCCATCATAACATGATTGAGTTGCGAAA  
ACTTCTGGATAGGTATCCTACA-----TCT-----  
GAACTGAATTCTTTC-----

-----  
TGGTTAAAGAATCTATTTCTAGTTGCTCTGGAACAATTAGGAGATTTGCTAGAAGAAATACGGGGTCTGCTTCTGGCGG  
CAACATGCTATGGGGTGGTGGTCCC-----  
GCTTACGGGGTCAAATCAATACGTTCTAAGAAGAAATTTTTGAATATCAATCTC-----  
ATCGATCTCATAAGTATCATAACCAAATCCTATCAATCGAATCACTTTTTTCGAGAAATACGAGACATCTAAGTCATAACAAG  
TAAAGAGATTTATTTCATTGATAAGA-----  
AAAAGAAAA---AACGTGAAC-----GGTGAT-----  
TGGATTGATGATAAAATCGAATCCTTGGTCGCGAACAGTGATTTCGATTGATGATAAAGAAAGAGAATTTCTTGGTTCAGTT  
CTCCACC-----TTAACGACAGAAAAAGGATTGATCAAATCTATTGAGTCTGACCCATAGTGATCATTATCA----  
-----

AAGAATGACTCTGGTTATCAAATGATTGAAGAGCCGGGAGCAATTTACTTACGATACTTAGTTGACATTCATAAAAAGTA  
TCTAATGAATTATGAGTTCAATACACCCTGTTTAGCAGAAAGACGGATATTCCTTGCTCATTATCAGACAATCACTTATT  
CACAAACCTCGTGTGGGGCGAATAGTTTTTCATTTCCCATCT---  
CATGGAAAACCCTTTTCGCTCCGCTTAGCCTTATCCCCCTCG---  
AGGGGTATTTTAGTGATAGGTTCTATAGGAAGTGGACGGTCTATTTGGTCAAATACCTAGCGACAAAAC---  
TCCTATGTTCCCTTTCATTACAGTATTTCTGAACAAGTTCCTGGATAAC---  
AAGCCTAAGGGTTTTCTTATTGATGATAGGGACGATATTGATGATAGTGACGATATTGATGTGAGTGACGATATC-----  
-----

Ranunculus CAAAATACCGTCTCAATTCATCCTATTTTATCAGATCCGGGATGT-----  
-----  
GATATGGTTCGGAAGGATGAACCGGATATGGACAGTTCCAATAAGATTTTATTCTTAAACCAAATTCATTTTTTTTATTT  
ATTTTCATCTATTCCATGACCGGAACAGGGGAGGATACACGTTG-----CACCACGATTTT---GAATCC-----  
GAAGAGAAATTTCAAGAAATGGCAGATCTATTAAGTCTATCAATAACCGAGCCGGATCTGGTGTATCATAAGGGATCGGC  
CTTTTCTATTGATTCC-----  
TACAGATTGGATCAAAAAAATTTCTTGAATGAGGTATTCAACTCCAGGGATGAATCGAAAAAGAAATCTTTATTG-----  
-----

GTTCTACCTCCTATTTTTTATGAAGAGAATGAATCTTTTTATCAAAGGATCAGAAAAAATGGGTCCAGATCTCCTGCGG  
GAATGCTTTGGAAGATCCAAAACAAAAA---  
AGAGTGGTATTTGCTAGCAACAACATAATGAAGGCAGTCAATCAATATAGATTTATCCAAAATCTGATTCAAATCCAA--  
----TATAGCACC-----CATGGGTACATAAGAAATGTATCGAATCAATTCTTT-----  
AAGAGATCCGATCGCAACTTCGAATATGGAATTCAA-----  
AGGGATCAAATAGGAAATGATACTCTGAATCATAGAACTATAATGAAATATACGATCAACCAACATTTATCGAAT-----  
-TTGAAA---AAGAGTCAGAAGAAATGGTTCGATCCTCTTATT-----  
TCTCGAACCGAGAGATCCACGAATCGGTATCCTGATGCATATAGATACAAATGGTCCAAGGGGAGCAAGAATTTACAGGA  
ACATTTGGAACATTTTCGTTGCTGAGCAGAAGAGCCTTTTT-----CAAGTA-----  
GTGTTTCGAT-----CGA-----TTACGTATTAAT--  
----CAAAATTCGATTGATTGGTCCGAGGTTATCGACAAACAATAT-----  
-----TTTTCTAAGTCACTTCGTTTCTTTTTGTCC---AAGTCGCTTCTC---  
TTTTTGTCTAAGTCACTT-----  
-----CCT---TTTTTCTTTGTGAGTATCGGGAATATCCCC---

AGTCATAGGTCCGAGATCCACATTTATGAA---  
TTGAAAGGTCCGAATGATCAACTCTGCAATCAGTTGTTAGAATCAATAGGTGTTCAAATTTGTTCAATTAAGATAACC  
ATCCTTCTTATTG-----  
GATGATCATGATACTTCCCAAAAATCGAAATTTCTTGTATCAATGGAGGAAGAATATCACCATTTTTGTTCAATAAGATAACC  
A---AAGTGATG---ATTGAATCATTCCATACCCGAAATAATCGCAGGAAATCCTTTGATAACCGCGGATTCC---

TATTTCTCAATGATATCCCACGATCGAGACAATTGGCTGAATCCTGCGAAACCATTTTCATAGAAGTTCATTGATATCTTC  
TTTTTATAAAGCAAATCGACTTCGATTCTTGAATAATCCACATCACTTCTGGTTCTATTGTAACAAAAGATTCCCTTTTT  
ATGTG-----GAAAAGGCCCGTATCAATAAGTATGATCTTACG-----TATGACAATTCCTCAAT-----  
-----

ATCTTGTTTCATTTCGCAAGAAAATATTTTCTTTGTGCGTCCGGTAAAGGTAAAAAAAACATGTTTTTGGG---  
GAGAGAGATACTATTTCA-----CCAATCGAGTCACAGGTATCTAACATATTCATACCT-----  
----AATGATTTT-----CCACAAAGT---GGTGACGAAACATATAACTTG-----  
TACAAATCTTTCCATTTTCCAATTCGACCCGCTCCATTTCGTTTCGT-----  
AGAGCTCTTTACTCGATCGCAGACATTTCTGGAACACCTCTAACAGAGGGACAAATTGTTTCATTTTGAAAGAACTTATTG  
TCAACCTCTTTCA-----GATATGAATCCATCTGATTGAGAAGGGAAGAAGTTCAT---CAGTATTTCAAT-----  
TTCAATTCAAACATGGGGTTGATTACACTCCATATTCTGAGAAATATTTACCATCCGAAAAGAGA-----  
-----

AAAAAAGG-----AGTCTTTGT-----  
CTAAAG-----AAATGCGTTGAGAAACGGCAG-----ATGTATAGAACCCTTTCAA---  
CGAGATAGTACTTTTTCAAATCTCTCAAATTGAAT---CTGTTCCAAACATAT---  
ATGCCATGGTTCCTTACTTCGGCAGGGTGCAAATATCTAAATCTCACCTTTTAGATACTTTTT---TCAGAC---  
CTATTGCCGATA---CTA-----  
-----

-----AGT-----ATCAGT-----CAAAAATGGGTATCCATTTTT---  
-----CATGATATTATGCGTGGATCAGATATATCATGGCCAATTCCTCAGAAAAA-----  
TTGTGGGCGATTCTTCCACAA-----  
TGAATCTGATA-----AGTGAGATT-----  
TCGAGTAAGTGTTCATGAT-----CTTCTTCTGTCTGAA-----GAAACGATTCGTCGA-----  
CATAATGAGTCACCCGTTCCATTGATATGGGCACATCTGAGATCACCAAATGCTCGGGAGTTACTCTATTCAATCCTTTT  
CTTTCTTCTTGTGCTGGATATCTAGTTTCGTACACATCTTCTCTTTGTTTCC-----  
CGAGCCTCTAGTGAGTTACAGACAGAGTTCGAAAAGATCAAATCTTTGATGATTCCATCATAATGATTGAGTTGCGAAA  
ACTTCTGGATGGGTATCCTACA-----TCT-----  
GAACGGAATTCCTTC-----  
-----

-----  
TGGTTAAAGAACCTCTTTCTAGTTGCTCTGAAACAATTCGGAGATTCTCTAGAAGAAATACGGGGTTCTGCTTCTGGCGG  
CAACATGCTATTGGGTGGTGGTCCC-----  
GCTTATGGGGTCAAATCAATACGTTCTAAGAAGAAATATTGGAATATCAATCTCGTTCGATATTATGGATCTCATAAGTAT  
CATACCAAATCCCATCAATCGAATCACTTTTTTCGAGAAATACGGGACATCTAAGTCGTACAAGTAAAGAGATCTATTCA  
TGATACGA-----AAAAGAAA---  
AACGTGAAC-----GGTGAT-----  
TGGATTGATGATAAAATAGAATCCTGGGTTGCGAACAGTGATTGATTGATGATGAAGAAAGAGAATTCCTGGTTCAGTT  
CTCCACC-----TTAACGACAGAAAAAGGATTGATCAAATTCATTGAGTCTGACTCATAGTGATCATTTATCA----  
-----

AAGAATGATTCTGGTTATCAAATGATTGAACAACCGGGATCAGTTTACTTACGATACTTAGTTGACATTCATAAAAAGAA  
TCTAATGAATTATGAGTTCAATAGATCCTGTATAGCAGAAAGACGGATATTCCTTGCTCATTCTCAGACAATCACTTATT  
CACAAACCTCGTGTGGGGCTAATAGTTTTTCATTTCCCATCT---  
CCTGGAAAACCCTTTTCGCTCCGCTTAGCCCTATCCCCCTCT---  
AGGGGTATTTTAGTGATAGGTTCTATAGGAACTGGACGATCCTATTTGGTCAAATACCTAGCGACAAAAC---  
TCCTATGTTCCCTTTCATTACGGTATTTCCGAACAAGTTCCTGGATGAC---  
AAGCCTAAAGGTTATCTTATTGATGATATCGATATTGATGATAGTGACGATATTGATGATAGTACGATATTGATGATAG  
TGACGATATC-----  
Spinacia CAAAATACCGTCTCAATTCATCCTATTTTCATCAGATCCGGGATGT-----  
-----

GATATGGTTCGCAAGGATGAACTGGATATGGACAGTTCGGATAAGATTTTCATTCTTGAACAAAATTCATTTTTTACTT  
ATTTTCATCTATTCCATGACCGAAACAGGGGGGATAACGCATTA-----CACCACGATTTT---GAATCC-----  
GAAGAGAAATTTCAAGAAATGGCAGATCTATTCACTCTATCAATAACCGATCCGGATCTGGTGTATCATAGGGGATTTTC  
CTTTTCTATTGATTCC-----  
TGCGGATTGGATCAAAAACAATTCCTTGAATGAGGTATTCAACTCCAGGGATGAATCAAAAAGAAATCTTTATTG-----  
----GTTCTATCTCTATTTTTTATGAAGAGAATGAATCTTTTTATCGAAGGATCCGAAAAAAGGGGTTTCAATCTCC-  
-----



-----  
AGAAATGTATTGAATCGATTCTTTTTAATAAATAGATCCGATCGCAGCTTCGAATATGGAATTCAA-----  
AGGGATCAAATAGGAAACGATACTTTGAATCATAGAACTATAAGGAAATATATGATCAACCAAGATTTCTCGAAT-----  
-TTGAAA---  
AAGAGTCAGAAGAAATGGTTTCGATCCTCTTATTTTTCTTTCTCGAACCGAGAGATTCATGAATCGGGATCCTGATGCATA  
TAGATACAAATGGTTCAATGGGAGCAAGAATTTCCAGGAACATTTGGAACATTTTCGTTTCTGAGCAGAAGAGCCGTTTT-  
-----CAAGTA-----GTGTTTCGAT-----  
-----CAA-----TTACGTATTAAT-----  
CAATATTCGATTGATTGGTCTGAGGTTATTGACAAAAAAGAT-----  
-----TTGTCTAAGTCACTTCGTTTCTTTTTGTCC---  
AAGTCACTTCGTTTCTTTTTGTCCAAGTTGCTT-----  
-----CTCTTTTTGTCTAACTCACTTCT---TTTTTCTTTGTGAGTTTCGGAATATCCCC---  
ATTAATAGGTCCGAGATCCGCATTTATGAA---  
TTGAAAGGTCCGAATGATCAACTCTACAATCCGTTGGTAGAATCAATAGGTCTTCAAATCGTTCATTTGAAAAAATGGAA  
AGCCTTCTTATTG-----  
GATGATCATGATACTTTCCAAAAATCGAAATTTCTTGATCAATGGAGGAACAATATCACCATTTTTGTTCATAAAGATAACC  
A---AAGTGGATG---ATTGACTCATTCCATACTAGAAATAATAGCGGGAAATCCTTTGATAACACGGATTCC---  
TATTTCTCAATGATATCCCACGATCAAAACAATTGGCTGAATCCCGTAAAACCATTTTCATAGAAGTTCATTGATATCTTC  
TTTTTATAAAGCAAATCAACTTCGATTCTTGAATAATCCACATCACTTCTGCTTCTATTGTAACAAAAGATTCCCTTTTT  
ATATG-----GAAAAGGCCCGTATCAATAATTCTGATTTTACG-----TATAGACAATTCCTCAAT-----  
-----ATCTTGTTTCATTCAACAACAACTATTTTCTTTGTGTGTCGGT-----  
AAAAAAAACATGCTTTTTTTG---GAGAGAGATACTATTTCA-----  
CCAATCGAGTCACAGGTATCTAACATATTCCTACCT-----AACGATTTT-----CCA--  
-----  
ATTCGATCCGATCTATTAGTTCGT-----  
AGAACTATTTACTCGATCGCAGACATTTCTGGAACACCTCTAACAGAGGGGACAACCTAGTCCATTTTGAAAGAACTTATTG  
TCAACCTCTTTCC-----GATATGAATCTATCTGATTTCAGAAAAGAAGAACTTGCAT---CAGTATCTCAAT-----  
TTCAATTCAAACATGGGTTTTATTTACTCTCCATGTTCTGAGAAATATTTACTATCGGAAAAGAGG-----  
-----  
AAAAAACGG-----AGTCTTTGT-----  
CTAAAG-----AAATGCGTTGAGAAAGGGCAG-----ATGTATAGAACCTTTCAA---  
CGAGATAGTGCTTTTTCAACTCTCTCAAAATGGAAT---CTATTCCAAACATAT---  
ATGCCATGGTTCCTTACTTCGACAGGGTACAAATATCTAAATTTTCTATTTTTAGATACTTTT---TCAGAC---  
TTATTGCCGATA---CTA-----  
-----AGT-----AGCAGT-----CAAAAATTTTTATCTATTCTT---  
-----CATGATATTATGCACGGATCAGGTATATCATGGCGAATTCTTCAGAAAAAA-----  
TTGTGT-----CTTCCACCA-----  
TGGAATCTGATA-----AGTGAGATT-----  
TCGAGTAAGTGTTACATAAT-----CTTCTTCTGCCCGAA-----GAAATGATTCATCGA-----  
AATAATGAGTCA-----  
CCATTGATATGGACACATCTGGCATCGCCAAATGTTCCGGGAGTTCTTCTATTCAATCCTTTTCCTTCTTTTTGTTGCTGG  
ATATCTCGTTTCGTACCCATCTTCTCTTTGTTTTT-----  
CGAGCCTCTAGTGAGTTACAGACAGAGTTCGAAAGGGTAAAATCTTTGATGATTCCATCATAACATGATTGAGTTGCGAAA  
ACTTCTGGATAGGTATCCTACA-----TCG-----  
GAACCGAATTCCTT-----  
-----  
TGGTTAAAGAATCTCTTTTTGGTTGCTTTAGAACAATTAGGAGATTCCCTAGAAGAAATAAGGGGTTCTGCTTCTGGCGA  
CAACATGCTATTGGGTGGTGGTCCCGGTCCCGCTTATGGGTTCAAATCAATACGTTCTAAGAAAAAATATTTGAATATTA  
ATCTCATCGATATCCTCGATCTCATAAGTATCATACCAAATCCCATCAATCGAATCACTTTTTTCGAGAAATACGAGACAT  
CTAAGTCATAACAAGTAAAGAGATCTATTTCATTGATAAGA-----  
-----AAAAGAAAA---AGGGTGAAC-----GGTGAT-----  
TGGATTGATGATAAAAATAGAATCCTGGGTCGCAAGCAGTGATTTCGATTGATGATGAAGAAAGAGAATTCTTGGTTTCAGTT  
CTCCACT-----TTAACGACAGAAAAAGGATTGATCAAATCTATTGAGTCTGACTCATAGTGATCATTTATCA-----  
-----



*[The area contains horizontal dashed lines for writing, but no text is present.]*

Typha \_\_\_\_\_

*[The area contains horizontal dashed lines for writing, but no text is present.]*



TCAACCTCTTTCA-----GATATGAATCTATCTGATTGAGAAAGGGAAGAACTTGCAT---CAGTATCTCAAT-----  
TTCAATTCAAACATGGGTTTGATTACACTCCATGTTCTGAGAAATATTTACCATCCGAAAAGAGG-----

-----  
-----  
AAAAAACGG-----AGTCTTTGT-----  
ATAAAG-----AAATGCGTTGAGAAAGGGCAG-----ATGTATAGAACCTTTCAA---  
CGAGATAGTGCTTTTTCAACTCTCTCAAAATGGAAT---CTATTCCAAACATAT---  
ATGCCATGGTTCCTTACTTCGACAGGGTACAAATATCTAAATTTGATATTTTTAGATACTTTT---TCAGAC---  
CTATTGCCGATA---TTA-----

-----AGT-----AGCAGT-----CCAAAATTTGTATCCATTTTT---  
-----CATGATATTATGTATGGATCAGATATATCATGGCGAATTCTTCAGAAAAA-----  
TTGTGT-----CTTCCACAA-----  
CGGAATCTGATA-----AGTGAGATT-----  
TCGAGTAAGTGTTACATAAT-----CTTCTTCTGTCCGAA-----GAAATGATTCATCGA-----  
AATAATGAGTCA-----  
CCATTGATATCGACACATCTGAGATCGCCAAATGTTCCGGGAGTTTCTCTATTCAATCCTTTTCTTCTTCTGTTGCTGG  
ATATCTCGTTCGTACACATCTTCTCTTTGTTTCC-----  
CGAGCCTCTAGTGAGTTACAGACAGAGTTCGAAAAGGTCAAATCTTTGATGATTCCATCATAACATGATTGAGTTGCGAAA  
ACTTCTGGATAGGTATCCTACA-----TCT-----  
GAACTGAATCTTTC-----

-----  
-----  
TGGTTAAGAATCTCTTTCTAGTTGCTCTGGAACAATTAGGAGATTCTCTAGAAGAAATACGGGGTTCTGCTTCTGGCGG  
CAACATGCTATTGGGTGGTGGTCCC-----  
GCTTATGGGGTCAAATCAATACGTTCTAAGAAGAAATATTTGAATATCAATCTCATCGATATCATCGATCTCATAAGTAT  
CATACCAAATCCCATCAATCGAATCACTTTTTCGAGAAATACGAGATGTCTAAGTCATACAAGTAAAGAGATCTATTTCAT  
TGATAAGA-----AAAAGAAAA---  
AACGTGAAC-----GGTGAT-----  
TGGATTGATGATAAAATAGAAATCCTGGGTCCGGAACAGTGATTGATTGATGATGAAGAAAGAGAATTCTTGGTTCAGTT  
CTCCACC-----TTAACGACAGAAAAAGGATTGATCAAATCTATTGAGTCTGACTCATAGTGATCATTATCA----

-----  
AAGAATGACTCTGGTTATCAAATGATTGAACAACCGGGAGCAATTTACTTACGATACTTAGTTGACATTCAAAAAAGTA  
TCTAATGAATTATGAGTTCAATACATCCTGTTTAGCAGAAAGACGGATATTCCTTGCTCATTATCAGACAATCACTTATT  
CACAAACCTCGTGTGGGGCTAATAGTTTTTCATTTCCCATCT---  
CATGGAAAACCTTTTCGCTCCGCTTAGCCCTATCCCCCTCT---  
AGGGGTATTTTAGTGATAGTTCTATAGGAACTGGACGATCCTATTTGGTCAAATACCTAGCGACAAAC---  
TCCTATGTTCTTTTCATTACGGTATTTCTGAACAAGTTCTGGATAAC---  
AAGCCTAAAGGTTTTCTTTTTGATGATATCGATATTGATGATAGTGACGATATTGATGCTAGTGACGATATTGATGCTAG  
TGACGATATTGATGCTAGTGACGATATC-----

Yucca

Blank lined writing area consisting of 40 horizontal dashed lines.

Zea

Blank lined writing area consisting of 13 horizontal dashed lines.

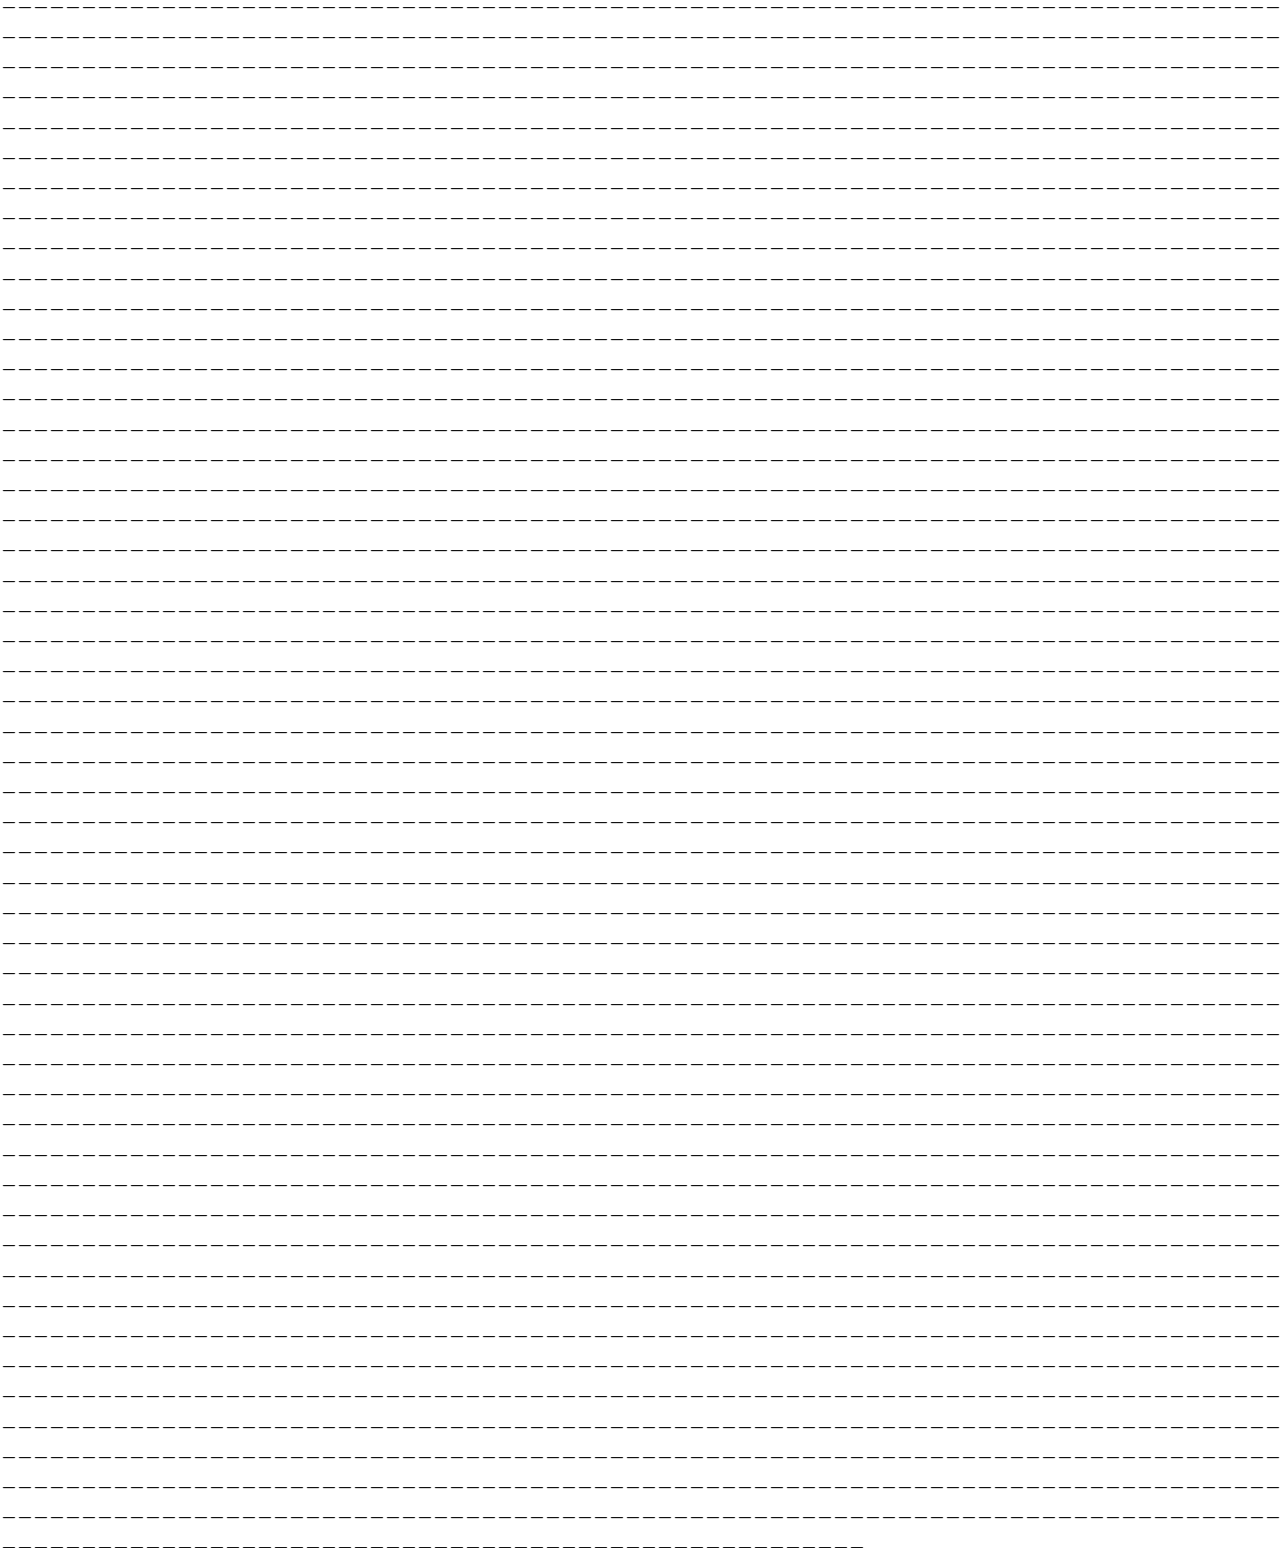

Acorus

-----AGTGATAACTTTGAT-----





TTCCTGGAATAAAATCGTTCGATTTTCTTCGATTCTTTATAAGAGATATCCAGTCTATTAGAATAGAAGTTAAA-----  
-----GAGGGTCTTTATTCTCGTCGT-----GTCCTTTATATGGAAATCAGAGGT-----  
CAGGGAGCGATTCCCTTGACTCGTACTGATGAGAAT-----TTG---  
ACTCCACGAGAAATTGAACAAAAGCAGCTGATTGAGCCTATTTCTTGCGTGTCCCA---ATTGAG---GTATTT-----  
-----

Amborella

-----GATGATGACCTTGAT-----GCG-----  
GAGCTGCTAACTATGACGAATGTGCTAACT-----ATGTATATGACGCCGAAA-----

ATGGACCGGTTTGATATCACCCCTCAATTAGAATTAGCAAAAGCAATGTCTCCTTGCATAATATGGATTCCAAACATTCA  
TGATCTGTATGTGAATGAGTCGAAT-----  
TACTTATCCCTCGGTCTATTAGTGAACCATCTCTCC-----AGAGATTGTGAAAGATGT---TCCACTAGAAAT---  
ATTCTTGTTATTGCTTCGACTCATATTTCCCAAAAAGTGGATCCCGCTCTAATAGCTCCGAATAAATCAAATACATGCAT  
TAAGATACGAAGGCTTCTTATTCCACAACAACGAAAGCACTTTTTATTCTTTTATATACTAGGGGATTCCAC-----  
TTGAAAAGAAGATGTTCCATACT-----  
AACGGATTCCGGTCCATAACCATGGGTTCCAATGCACGAGATCTTGTAGCACTTACCAATGAGGCCCTATCAATTAGTAT  
TACACAGAAGAAATCAATTATAGACACTAATACAATTAGATCAGCTCTTCATAGACAAACTTGGGATTTGCGATCC-----  
-----

CAGGTAAGATCCGTTGAGGATCATGGGATCCTTTTTCTATCAGATAGGAAGGTCTTTGCACAAAATGTACTTCTAAGTAA  
TTGCTCC-----ATAGATCCTATATCTACCTATATGAAGAAGAAATCA-----TGTAAG---  
GAAGGGGATTCTTATTTGTACAAATGGTACTTTCGAACCT-----  
GGAACGAGCATAAAGAAATTAACGACACTTCTTTATCTTTTGAGTTGTTCTGCCGGATCGGTTCGCTCAAGATCTTTGGTC  
TCCACCCGGACCCGATGAAAAAATTGGATCACTTCTTATGGATTTCGTTGAGAAT-----  
GATTCTGATCTAGTTCATGGC-----CTATTA-----  
GAAGGCGCT-----CTGGTGGGA-----TCCTCACGGACA-----  
-----  
-----  
-----

-----GAAAAAGATTGCAGTCAGTTTGATAATGATCGAGTG-----  
ACATTGCTTCTTCGGTCCGAACCAAGGAATCCGTTAGATATGATGCAAAATGGATCTTGTTCTATCGTT---  
GATCAGAGATTTCTATATGAAAAATACGAATCGGAGTTTGAAGAA-----  
GGGGAAGGAGAAGGAACCCTC-----GACCCG---CAACAGATAGAGGAGGAT-----TTATTC---  
AATCACATAGTTTGGGCTCCTAGAATATGGCGCCCT---TGTGGCAATCTA-----  
TTTGATTGTATCGAAAGGCCCAATGAA-----TCGAGATTTCCCTATCGG-----  
-----  
-----  
-----

TCCAGGTCATTTCCGGGCAAGCAGATCATTCTCATAAA-----  
GAGGATGAGCTTCAAGAGAATGATTTGGAGTTCTTGCAGAGTGGAAACC---ATG---CAGTACCAGACACGAGATAGA--  
---TCCTCCAAAGAA-----CAAGGGTTT-----TTTCAAATAAGCCAATTCATTTGGGACCCC-----  
GCAGATCCA---TTCTTTTTCTTATTC---AAAGATCAGCCCTTTGTCTCT-----GTGTTTGCA-----CGT---  
CGAGAATTCCTTT-----GCAGATGAAGAGATGTCAAAG--  
-GGGCTTATT-----ACTTCCCAAACA-----CATTCTCCTACATCTATATATGAACGCTGGTTGATC-----  
AAGAATACGCAAGAAAAG-----CACTTCGAATTGTTGATTCATCGCCAGAGATGGCTT-----AGCACC-----  
AATAGTTCATTATCTAAT-----GGATCTTTCCGTTCTAATACG-----  
CCATCCGAGAGTTATCAGTATTTATCAAATCTGTTCTCTATCT---  
AACGGAACGCTATTGGATCAAATGGCAAAGACATTGTTGAGAAAGAGATGGCTTTTCCCGGATGAAATGAAACATTTGAT  
TCATGTAACAGGAGAAAGATTTCCCATTCCTTAG-----ATGCCTAGATCT-  
--

CGGATAAATGGCAATTTTATCGATAAGACCTCTTCAATTGTAGCCAATATCTTATTACGGATCATTCCGACGACTTCAGG  
AGAAAAAGAGGCATTTACCTATTACAGAGATGGG-----ATGTCAGCTCAATCTGAAGGAAATTATGCG---  
GAAGCTTTACAGAATTATTATGAAGCTACGCGACCAGAAATTGATCCCTATGATCGAAGTTATATACTCTATAATATAGG

ACTTATCCACACAAGCAACGGAGAACATACGAAGGCTTTGGAATATTATTTTCGGGCACTAGAACGAAATCCATTCTTAC  
CACAAGCTTCTAATAATATGGCCGTGATCTGTCATTACCGGGGAGAACAGGCCATTTCGACAGGGAGATTCTGAAATCGCA  
GAGACTTGGTCCGATCAAGCAGCTGAGTATTGGAAACAAGCTATAGCGCTTACTCCAGGTAATTATATTGAAGCACAGAA  
TTGGTTGAAGATCACGAGGCGCTTC---GAA-----  
-----ATGAACTGGCGATCAGAACGT-----  
ATATGGATAGAACTTATAACAGGTTCTCGAAAAACAAGTAATTTATGTTGGGCCTGTATACTTTTTTTAGGTTCACTAGG  
GTTCTTATTAGTTGGAACCTCCAGTTATCTTGGCAGGAATCTGATATCCTTATTTCCG---TCTCAG-----  
CAAATCCTTTTTTTTTCCACAAGGGATTGTGATGTCTTTCTATGGTATCGCAGGTCTGTTTCATTAGCTCCTATTTGTGGTG  
CACAATTCTGTGGAATGTAGGTAGTGGTTATGATAGATTTGATAGAAAAGAAGGAATAGTGTGTATTTTTTCGTTGGGGAT  
TTCTTGGAAAGAAATCGTCGTATCTTCTTTTCGATTCTTATGAGAGATATTCGGTCAATCAGAATGGAAGTGAAA-----  
-----GAAGGTATTTATCCTCGTCGT-----GTCCTTTCTATTGAAATAAGAAGC-----  
CAGGGATCCATTCCCTTGACTCGTACTGATGAAAAT-----TTC---  
ACTCCACGAGAAATTGAGCAAAAAGCTGCTGAATTGGCCTATTTCTTGCGCGTACCA---ATTGAA---GTATTT-----  
-----  
Arabidopsis -----  
-----  
-----GATCGTGAACCTTGAT-----  
ACGGAGCTGGAGCTTCTAACTATGATGAATGCGCTAACT-----ATGGATATGATGTTGGAA-----  
-----  
ATAGACCGATTTTATATCACCCCTTCAATTCGAATTAGCAAAAGCAATGTCTCCTTGCATAATATGGATTCCAAACATTCA  
TGATCTTGATGTGAATGAGTCGAGT-----  
TACTTAGCCCTCGGTCTATTGGTGAACCTCTCTCTCC-----AGGGATTGTGAAAGATGT---TCCACTAGAAAT---  
ATTCTTGTTATTGCTTCGACTCATATTCGCCAAAAAGTGGATCCCGCTCTAATAGCCCCGAATAAATTAATACATGCAT  
TAAATACGAAGGCTTCTTATTCCACAACAACGAAAGCACTTTTTCACTCTTTCCTATACTAGGGGATTTTAC-----  
TTGGAAAAGAAAATGTTCCATACT-----  
AATGGATTTCGAGTCTATAACCATGGGTTCCAGTGCACGAGATCTTGTAGCACTTACCAATGAGGCCCTATCAATTAGTAT  
TACACAGAAGAAATCAATTATAGACACTAATAACAATTAGATCTGCTCTTCATAGACAAACTTGGGATTTGCGATCC----  
-----  
CAGGTAAGATCGGTTCAGGATCATGGGATCCTTTTTCTATCAGATAGGAAGGGCTGTTGCACAAAATGTACTTTATAAGTAA  
TTGCCCC-----ATAGATCCTATATCTATCTATATGAAGAAGAAATCA-----TGTAAC---  
GAAGGGGATTCTTATTTGTACAAATGGTACTTTCGAGCTT-----  
GGAACGAGCATGAAGAAATTCACGATACTTCTTTATCTTTTGTAGTTGTTCTGCCGGATCGGTGCGTCAAGACCTTTGGTC  
TCTACCCGTACCCGATGAAAAAATAGGATCACTTCTTATGGATTGTTGAGAAT-----  
GATTTCGGATCTAGTTCATGGC-----CTATTA-----GAAGTG-----  
CAAGGCGCT-----TTGGTGGGA-----TCCTCACGGACA-----  
-----  
-----GAAAAAGATTGCAGTCAGTTTGATAATGATCGAGTG-----  
ACATTGCTTTTTCGCTCCGAACCAAGGGATCCCTTATATATGATGCAAGATGGATCTTGTCTATCGTT---  
GATCAGAGATTTCTCTATGAAAAATACGAATCGGAGTTTGAAGAA-----  
GGGGAAGGAGAAGGAGTCCTC-----GACCCG---CAACAGATAGAGGAGGAT-----TTATTC---  
AATCACATAGTTTGGGCTCCTAGAATATGGCGCCCT---CGGGGCTTTCTA-----  
TTTGATTGTATCGAAAGGCCTAATGAA-----TTGGGATTTCCCTATTTCG-----  
-----  
-----  
GCCGGGTCATTTTCGGGGCAAGCGGATCATTTTATGATGAA-----  
AAGTATGAGCTTCAAGAGAATGATTTCGGAGTTCTTGCAGAGCGGAACC---ATG---CAGTACCAGAGACGAGATAGG--  
---TCTTCCAAAGAA-----CAAGGCTTT-----TTTGAATAAGCCAATTCATTTGGGACCCC-----  
GCAGATCCA---CTCTTTTTCTATTTC---AAAGATCAACCCTTTGTCTCT-----GTGTTTTCA-----CAT---  
CGAGAATTTCTTT-----GCAGATGAAGAGATGTCAAAG--  
-GGGCTTCTT-----ACTTCCCAAACG-----GATCCTCCTACATCTATATATAAACGCTGGTTTATC-----

AAGAATACGCAAGAAAAG-----CACTTCGAATTGTTGATTTCAGCGCCAGAGATGGCTT-----AGAACC-----  
AATAGTTTCATTATCTAAT-----GGATTTTTCCGTTCTAATACT-----  
CGATCCGAGAGTTATCAGTATTTATCAAATCTGTTTCATATCT---  
AACGGAACGCTATTGGATCGAATGACAAAGACATTGTTGAAAAAAGATGGCTTTTCTCGGATGAAATGAAATAGGATT  
CATGTAA-----ATGCCAAGATCG-

CGTATAAATGGAAATTTTATTGATAAAACCTTTACAATTGTAGCCGATATCTTATTACGAGTCATTCCGACAACCTCCGG  
AGAAAAAGAGGCATTTACTTATTACAGAGATGGT-----ATGTCGGCTCAATCTGAAGGAAATTATGCG---  
GAAGCATTACAGAATTATTATGAAGCTATGCGACTAGAAATTGACCCCTATGATCGAAGTTATATACTCTATAATATAGG  
CCTTATCCATAACAAGTAATGGGGAACATACCAAAGCTTTAGAATATTATTTTCGGGCATTAGAACGAAACCCCTTTTAC  
CACAAGCTTTTAATAATATGGCTGTGATCTGTTCATTACCGTGGAGAACAGGCCATTCAACAAGGAGATTCTGAAATGGCG  
GAGGCTTGGTTTCGCTCAAGCCGCTGAGTATTGGAAACAGGCTATAACGCTTACTCCTGGTAATTATATTGAAGCACAGAA  
TTGGTTGACGATCACGAGGCGCTTC---GAATAA-----

-----ATGAGTTGGCGATCAGAATCT-----  
ATATGGATAGAATTTATAACGGGGTCTCGAAAAACAAGTAATTTCTGCTGGGCCTTTATCCTATTTTTAGGTTTCATTAGG  
ATTCTTATTGGTTGGAACCTCCAGTTATCTTGGTAGAAATGTTATATCGTTATTTCCG---TCCCAG-----  
CAAATCATTTTTTTTCCACAAGGGATTGTGATGTCTTTCTATGGGATCGCAGGTCTCTTTATTAGTTGCTATTTGTGGTG  
CACTATTTTGTGGAATGTGGGTAGTGGTTATGATCTTTTCGACCGAAAAGAAGGAATAGTGCATTTTTTTCGTTGGGGAT  
TTCTTGAAAAAGTCGTCGCATCTTTTTACGATTCTTTATGAAAGATATTCAGTCCATCAGAATAGAAGTTAAA-----  
-----GAGGGTGTCTGCCCCGCGT-----GTCCTTTATATGGAAATTCGAGGT-----  
CAAGGGGCTATTCCTTTAATTCGTAATGAGAAAT-----TTT---  
ACTACACGAGAAATTGAGCAAAAAGCTGCTGAATTGGCTTACTTCTTGCCTGTACCA---ATTGAA---GTATTT-----

Atropa

-----GGTCGTGACCTTGAT-----  
ACGGAGCTGGAACCTGCTAACTAGGATGAATGGGCTAACT-----ATGGATATGATGCCGGAA-----

ATAGACCGATTTTATATCACCCCTTCAATTCGAATTAGCAAAAGCAATGTCTCCTTGCATAATATGGATTCCAAACATTCA  
TGATCTGGATGTGAATGAGTCGAAT-----  
GACTTATCCCTCGGTCTATTAGTGAACCATCTCTCC-----AGGGATTGTGAAAGATGT---TCTACTAGAAAT---  
ATTCTTGTTATTGCTTCGACTCATATTCGCCAAAAGTGGATCCCGCTCTAATAGCTCCGAATAAATTAATACGTGCAT  
TAAGATACGAAGGCTTCTTATTCCACAACAACGAAAGCACTTTTTCACTCTTTTATATACTAGGGGATTTTAC-----  
TTGAAAAGAAAATGTTCCATACT-----  
AACGGATTCCGGTCCATAACCATGGGTTCCAATGCACGAGATCTTGTAGCACTTACCAATGAGGTCCTATCGATTAGTAT  
TACACAGAAGAAATCAATTATAGACACTAATACAATTAGATCCGCTCTTCATAGACAAACTTGGGATTTGCGATCC-----

CAGGTAAGATCGGTTCAGGATCATGGGATCCTTTTCTATCAGATAGGAAGGGCTGTAGCACAAAATGTACTTCTAAGTAA  
TTGCCCC-----ATAGATCCTATATCTATCTATATGAAGAAGAAATCA-----TGTAAC---  
GAAGGGGATTCTTATTTGTACAAATGGTACTTTCGAGCTT-----  
GGAACGAGCATGAAGAGATTAACGATACTTCTTTATCTTTTGTGTTGTTCTGCCGGATCGGTCGCTCAAGATCTTTGGTC  
TTTATCCGGACCCGATGAAAAAATGGGATCACTTCTTATGGACTCGTTGAGAAT-----  
GATTCTGATCTAGTTTCATGGC-----CTATTA-----GAAGTA-----  
GAAGGCGCT-----CTGGTGGGA-----TCTTCACGGACA-----

-----GAAAAAGATTGCAGTCAGTTTGATAATGATCGAGTG-----  
ACATTGCTTCTTCGGCCCGAACCGAGGAATCCCTTAGATATGATGCAAAAGGGCTCTTGTTCTATCCTT---  
GATCAGAGATTTCTCTATGAAAAATATGAATCGGAGTTTGAAGAA-----  
GGGGAGGGAGAAGGAGCCCTT-----GACCCG---CAG-----GAGGAT-----TTATTC---  
AATCACATAGTTTGGGCTCCTAGAATATGGCGCCCT---TGGGGCTTTCTA-----  
TTTGATTGTATCGAAAGGCCCAATGAA-----TTGGGATTTCCCTATTGG-----

TCCAGGTCATTTTCGGGGCAAGCGGATCATTTTATGATGAA-----  
GAGGATGAGCTTCAAGAGAATGATTCGGGGTTCCTGCAGAGTGGAACC---ATG---CAGTACCAGACACGAGATAGA--  
----TCTTCCAAAGAA-----CAAGGCCTT-----TTTCGAATAAGCCAATTCATTTGGGACCCT-----  
GCAGATCCA---CTCTTTTTTCCTATTTC---AAAGATCAGCCCCCTGGCTCT-----GTGTTTTCA-----CAT---  
CGAGAATTATTT-----GCAGATGAAGAGATGTCAAAG--  
-GGGCTTCTT-----ACTTCCCAAACA-----GATCCTCCTACATCTATATATAAAACGCTGGTTTATC-----  
AAGAATACGCAAGAAAAG-----CACTTCGAATTGTTGATTAATCGTCAGAGATGGCTT-----AGAACC-----  
AATAGTTCATTATCTAAT-----GGATCTTTCCGTTCTAATACT-----  
CTATCCGAGAGTTATCAGTATTTATCAAATCTGTTCCCTATCT---  
AACGGAACGCTATTGGATCAAATGACAAAGACATTGTTGAGAAAAAAGATGGCTTTTCCCGGATGAAATGAAAATTGGATT  
CATGTAA-----ATGCCTAGATCA--  
--

CGGATAAATGGAAATTTTATTGATCAGACCTTTTTCAATTGTAGCCAATATCTTATTACGAGTAATCCGACAACCTCAGG  
AGAAAAGAGGCATTTACCTATTACAGAGATGGT-----ATGTCGGCTCAATCCGAAGGAAATTACGCG---  
GAAGCTTTGCAGAATTATTATGAAGCTATGCGACTAGAAAATTGATCCCTATGATCGAAGTTATATACTCTATAATATAGG  
GCTTATCCACACAAGTAATGGAGAACATACGAAAGCTTTGGAATATTATTTTCGAGCACTAGAACGAAACCCATTCTTAC  
CACAAGCTTTTAATAATATGGCCGTGATCTGTCATTACCGGGGAGAACAGGCCATTCAACAGGGGAGATTCTGAAATTGCG  
GAGGCTTGGTTTTGATCAAGCCGCTGAGTATTGGAACAGGCTATAGCGCTTACTCCCGGTAATTATATTGAAGCGCATAA  
TTGTTGAAGATCACGAGACGTTTC---GAA-----

-----ATGACTTGGCGATCAGAACAT-----  
ATATGGATAGAACTTATAACGGGGTCTCGAAAATAAGTAATTTCTGCTGGGCCTTTATCCTTTTTTATTAGGTTATTAGG  
CTTCTATTAGTTGGAACCTCCAGTTATCTTGGTAGAAATTTGATATCTTTTTTTCCG---ACTCAG-----  
CAAATCGTTTTTTTTCCACAAGGAATCGTGATGTCTTTCTACGGAATTGCGGGTCTCTTTATTAGCTCTTATTTGTGGTG  
CACAATTTCCCTGGAATGTAGGTAGTGGTTATGATCGATTGATAGAAAAGGAAGGAATAGTCTGTATTTTTTCGTTGGGGAT  
TTCCGGGAAAAAATCGTGCATATTTCTCCGATTCCTTATAAAAGATATTTCAGTCCGTTAGAATAGAAGTTAAA-----  
-----GAGGGTATTTCTGCTCGTCGT-----GTTCTTTATATGGACATCCGAGGC-----  
CAGGGGTCCATTCCCTTGACCCGTA CTGATGAGAAT-----TTG---  
ACTCCACGAGAAAATTGAACAAAAGGCTGCTGAATTAGCCTATTTCTTGCCTGTACCA---ATTGAA---GTATTT-----

Buxus -----

-----  
-----  
-----  
-----  
-----  
-----  
-----  
-----  
-----  
-----  
-----  
-----  
-----  
-----  
-----  
-----  
-----  
-----  
-----  
-----  
-----

-----ATGTCTAGATCG-----  
CGGATAAATGGAAATTTTATTGATAAGACCTTCTCAATTGTAGCCAATATTTTATTACGGATAATTCCGACAACCTTCAGG  
AGAAAAAGAGGCATTTACCTATTACAGAGATGGG-----ATGTCAGCTCAATCCGAAGGAAATTATGCG---  
GAAGCTTTACAGAATTATTATGAAGCTACGCGACTAGAAATTGATCCCTATGATCGAAGTTATATACTCTATAACATAGG  
CCTTATCCACACAAGCAACGGAGAACATACGAAAGCTTTGGAATATTATTCCCGGGCACTAGAACGAAACCCATTCTTAC  
CACAAGCTTTTAATAATATGGCCGTGATCTGTCATTACCGGGGAGAACAGGCCATTTCGACAGGGGGATTCTGAAATTGCG  
GAGGCTTGGTCCGATCAAGCCGCTGAATATTGAAACAAGCTATAGCACTTACTCCGGGTAATTATATTGAAGCGCATAA  
TTGGTTGAAGATCACGGGTCGGTTC---GAA-----

-----ATGAGCTGGCGATCAGAACGT-----  
ATATGGATAGAACTTATAATGGGGTCTCGAAAAACAAGTAATTTCTGCTGGGCCTTTATCCTTTTTTTAGGTTCACTAGG  
ATTCTTATTGGTTGGAACCTCCAGTTATATTGGCAGGAATCTGATATCTTTATTTCCG---TCTCAG-----  
CAAATAATTTTTTTTTCCACAAGGAATTGTGATGCTTTTTATGGGATCGCAGGTCTGTTTCATTAGCTCCTATTTGTGGTG  
TACAATTTTCGTGGAATGTAGGCGGTGGTTATGATCGATTTCGATAGAAAAGAAGGAAGAGTGTGTATTTTTTCGTTGGGGAT  
TTCTTGAATAAATCGTCGCATCTTCTCCGATTCTTATGAGAGATATCCAGTCGATCAGAATAGAAGTTAAA-----  
-----GAGGGTCTTTATCCTCGTCGT-----GTCCTTTATATGGAAGTAAGAGGC-----  
CAGGGGGCCATTCCCTTGACTCGTACTGATGAGAAT-----TTT---  
ACTCCACGAGAAATTGAGCAAAAAGCTGCTGAATTGGCATATTTTTTGC GCGTACCA---ATTGAA---GTATTT-----

Calycanthus

-----GATGATGACCTTGAT-----ACG-----  
GAGCTGCTAACTATGACGAATGTGCTAACT-----ATGTATATGACGCCGAAA-----

ATAGACCGATTTGATATCACCTTCAATTCGAATTAGCAAAAGCAATGTCCCCTTGCATAATATGGATTCCAAACATTCA  
TGATCTGTATGTGAATGAGTCGAAT-----  
TACTTATCCCTCGGTCTATTAGTGAACCTATCTCTCC-----AGAGATTGTGAAAGATGT---TCCACTAGAAAT---  
ATTCTTGTATTGCTTCGACTCATATTTCCCAAAAAGTGGATCCCGCTCTAATAGCTCCGAATAAATCAAATACATGCAT  
TAAGATACGAAGGCTTCTTATTCCACAACAACGAAAGCACTTTTTTATTCTTTTATATACTAGGGGATTTTAC-----  
TTGAAAAGAAAATGTTCCATACT-----  
AACGGATTCCGGTCCATAACCATGGGTTCCAATGCACGAGATCTTGTAGCACTTACCAATGAGGCCCTATCAATTAGTAT  
TACACAGAAGAAATCCATTATAGACACTAATACAATTAGATCAGCTCTTCATAGACAAACTTGGGATTTGCGATCC-----  
-----

CAGGTAAGATCGGTTTCAGGATCATGGGATCCTTTTTCTATCAGATAGGAAGGGCTGTTGCACAAAATGTACTTTCTAAGTAA  
TTGCCCC-----ATAGATCCTATATCTATCTATATGAAGAAGAAATCA-----TGTAAG---  
GAAGGGGATTCTTATTTGTACAAATGGTACTTTCGAGCTT-----  
GGAACGAGCATGAAGAAATTAACGATACTTCTTTATCTTTTGTGTTGTTCTGCCGGATCGGTCGCTCAAGATCTTTGGTC  
TCCACCCGGACCCGATGAAAAAATTGGATCACTTCTTATGGATTTCGTTGAGAAT-----  
GATTCTGATCTAGTTTCATGGC-----CTATTA-----GAAGTA-----  
GAAGGCGCT-----CTGTTGGGA-----TCCTCACGGACA-----

-----GAAAAAGATTGCAGTCAGTTTGATAATGATCGAGTG-----  
ACATTGTTTCTTCGGTCCGAACCAAGGAATCCGTTAGATATGATGCAAAATGGATCTTGTTCATCGTT---  
GATCAGAGATTTCTCTATGAAAAATATGAATCGGAGTTTGAAAGAA-----  
GGGGAAAGAGAAGGAGCCCTC-----GACCCG---CAACAGATAGAGGAGGAT-----TTATTC---  
AATCACATAGTTTGGGCTCCTAGAATATGGCGCCT---TGTGGCAATCTA-----  
TTTGATTGTATCGAAAGGACCAATGAA-----TTGGGATTTCCCTATTGG-----

GCCAGGTCATTTCCGGGCAAGCGGATCATTTATCATAAA-----  
GAGGATGAGCTTCAAGAGAATGATTCGGGATTTCTGAGAGTGGAAACC---ATG---CAGTACCAGACACGAGATAGA--  
---TCTTCCAAAGAA-----CAAGGCTTT-----TTTCGAATAAGCCAATTCATTTGGGACCCT-----  
GCAGATCCA---TTCTTTTTTCTATTTC---AAAGATCAGCCCTTTGTCTCT-----GTGTTTTCA-----CGC---  
CGAGAATTTCTTT-----GCAGATGAAGAGATGTCAAAA--  
-GGGCTTATT-----ACTTCCCAAACA-----AATCCTCTACATCTATATATAAACGCTGGTTTCATC-----  
AAGAATACGCAAGAAAAG-----CACTTCAATTGTTGATTCATCGCCAGAGATGGCTT-----AGAACC-----  
AATAGTTCATTATCTAAT-----GGATCTTTCCGTTCTAATACT-----  
CCATCCGAGAGTTATCAGTATTTATCAAATCTGTTCCCTATCT---  
AACGGAACGCTATTGGACCAAATAGCAAAGGCATTGTTGAGAAAAGAGATGGCTTTTCCCGGATGAAATGAAACATTTGAT  
TCATGTAACAGGAGAAAAGATTTCCCATTCTTAG-----ATGCCTAGATCT--  
--

CGGATAAATGGAAATTTTTATTGATAAGACCTCTTCAATTGTAGCCAATATCTTTATTACGAATAATTCCGACAACCTTCAGG  
AGAAAAAGAGGCAATTTACCTATTACAGAGATGGT-----ATGTCAGCCCCAATCCGAAGGAAATTATGCG---  
GAAGCTTTACAAAATTATTATGAAGCTACGCGACTAGAAATTGATCCCTATGATCGAAGTTATATACTCTATAACATAGG  
CCTTATCCACACAAGCAACGGAGAACATACGAAGGCTTTGGAATATTATTTCCGGGCAATAGAACGAAATCCATTCTTAC  
CACAAGCTTTTTAATAATATGGCCGTGATCTGTCATTACCGGGGAGAACAGGCCATTCGACAAGGAGATTCTGAAATTGCA  
GAGGCTTGGTCCGATCAAGCTGCTGAATATTGGAAACAAGCTATAGCGCTTACTCCGGGTAATTATATTGAAGCACATAA  
TTGGTTGAAGATCGCAAGGCGGTTT---GAA-----

-----ATGAACTGGCGATCAGAACGT-----  
ATATGGATAGAACTTATAACGGGGTCTCGAAAAACAAGTAATTTCTGCTGGGCTGTATCCTTTTTTTTAGGTTCACTAGG  
ATTCTTATTGGTTGGAACCTTCAGATTATCTTGGTAGGAATCTGATATCCCTATTCCCA---TCTCAG-----  
CAAATCATTTTTTTTTCCCAAGGGATCGTGATGTCTTTCTATGGGATCGCGGGTCTGTTCATTAGTTCCATTTTGTGGTG  
CACAATTTTCGTGGAATGTAGGTAGTGGTTATGATCGATTCGATAGAAAAGAAGGAATAGTGTGATTTTTTCGTTGGGGAT  
TTCTTGGAAATAAATCGTCGCATCTTCTTCGATTTCTTATGAGAGATATCCAGTCCATCAGAATGGAAGTTAAA-----  
-----GGGGTCTTTATTTCTCGACGT-----GTCCTTTATATGGAATCAGAGGC-----  
CAGGGTGCCATTCCTTGACTCGTACTGATGAGAAT-----TTT---  
ACTCCACGAGAAATTGAACAAAAGCTGCTGAATTAGCCTATTTTTTGGCGGTGCCA---ATTGAA---TTGAAA-----

Ceratophyllum -----  
-----GATGATGACCTTGAT-----ACGGAGCTG--  
-----CTAACG-----ATGTATATGACGCCGAAA-----

ATAGACCGATTTGATATCACCCCTCAATTCGAATTAGCAAAGCAATGTCTCCTTGCCATAATATGGATTCCAAAACATTCA  
TGATCTGTATGTGAATGAGTCAAT-----  
TACTTATCCCTCGGTCTATTAGTAACTATCTCTCC-----AGGGATTGTGAAAGATGT---TCTACTAGAAAAG---  
ATTCTAGTTATTGCTTCGACTCATATTTCCCAAAAAGTGGATCCCGCTCTAATAGCTCCGAATAAATTAATACATGCAT  
TAAGATACGAAGGCTTCTTATTCCACAACAACGAAAACGCTTTTTTCATTCTTTCATATACTAGGGGATTTTCGC-----  
TTGGAAAAGAAAATGTTCCATACT-----  
AACGGATTCCGGTCCATAACCATGGGTTCCAATGCACGAGATCTTGTAGCACTTACCAATGAGGCCCTATCAATTAGTAT

TACACAGAAGAAATCAATTATAGACACTAATACAATTAGAGCAGCTCTTCATAGACAAACTTGGGATTTGCGATCC----  
-----  
CGGGTAAGGTCGGTTCAGGATCATGGGATCTTTTTCTATCAGATAGGAAGGGCTGTTGCACAAAATGTACTTCTAAGTCA  
TTGCCCC-----ATAGATCCTATATCTATCTATATGAAGAAGAAATTA-----TGTAAG---  
GAAGGGGATTCTTATTTGTACAAATGGTACTTTCGAACTT-----  
GGAACGAGCATAAAGAAATTCACGATACTTCTTTATCTTTTGAGTAGTTCTGCCGGATTTCGTCGCTCAAGATCTTTGGTC  
TCCCCCAGGACCCGATGAAAAAATGGGATCACTTCTTATGGATTTCGTTGAGAAT-----  
GACTCTGATCTAGTTTCATGCC-----CTATTA-----GAAGTA-----  
GAAGGCGCT-----CTGGTGGGA-----TCCTCACGGACA-----  
-----  
-----  
-----  
-----

-----GAAAAAGATTGCAGTCAGTTTGATAATGATCGAGCG-----  
ACATTGCTTCTTCGGTCCGAACCAAGGAATCAGTTAGATATGATGCAAAATGGATCTTGTTCTATCGTT---  
GATCAGAGATTTCTATATGAAAAAGACGAATCGGACTTTGAAGAA-----GGGGAA-----  
GGAGCCCTT-----GACCCG---CAACAGATAGAGGAGGAT-----TTATTC---  
AATCACATAGTTTGGGCTCCTAGAATATGGCGCCCT---TGTGGCAATCTA-----  
TTTGATTGTATCGAAAGTCCCAATTCA-----TTGGGATTTCCCTATTGG-----  
-----  
-----  
-----  
-----

GCCAGGTCATCTCGGGGCAAGCGGATCATTATCATAAA-----  
GAGGATGAGCATCAAGAGAATGATTTCGGAGTTCCTGCAGAGTGGAACC---ATG---CAGTACCAGACACGAGATAGA--  
---TCTTCCAAAGAA-----CAGGGGTTT-----TTTCGAATAAGCCAATTCATTTTGGACCCT-----  
GCGGATCCA---TTCTTTTTCTATTT---AAAGATCAGCCCTTTGTCTCT-----GTGTTTTCA-----CGT---  
CGAGAATTTCTTT-----GCGGATCAAGAGATGTCAAAG--  
-GGGCTTATT-----ACTTCCCAAACA-----AATCCTCCTACATCTCTATATAAACGCTGGTTTCATC-----  
AAGAATACGCAAGAAAAG-----CACTTCCAATTGTTGATTCATCGCCAGAGATGGCTT-----AGAACC-----  
AATAGTTCATTATCTAAT-----AGATCTTCCCGTTCTAATACT-----  
CCATCCGAGAGTTATCAGTATTTATCAAATCTGTTCCCTATCT---  
AACGGAACGCTATTGGATCAAATGACAAAGACATTGTTGAGAAAAGAGATGGCTTTTCCCGGATGAAATGAAACATTTGAT  
TCATGTAACAGGAGAAAGATTTCCCATTCCTTAG-----ATGCCTAGATCT--  
--

CGGATAAATGGAAATTTTATTGATAAAACCTCTTCAATTGTAGCCAATATCTTATTACGAATAATTCGACAACCTTCAGG  
AGAAAAAGAGGCATTTACCTATTACAGAGATGGG-----ATGTCAGCTCAATCCGAAGGAAATTATGCG---  
GAAGCTTTACAGAACTATTATGAAGCTATGCGCCTTGAAATTGATCCTTATGATCGCAGTTATATCCTCTATAACATAGG  
CCTTATCCACACAAGTAACGGGAGAACATACAAAGGCTTTGGAATATTATTTCCGAGCACTCGAACGAAATCCATTCTTAC  
CACAAGCTTTTTAATAATATGGCCGTGATCTGTCATTACCGGGGGGAACAGGCCATTTCGACAGGGGGATTCTGAAATTGCG  
GAGGCTTGGTTTGATCAAGCCGCTGAGTATTGGAACAAGCTATAGCGCTTACTCCAGGTAATTATATTGAAGCACATAA  
TTGGTTGAAGATCACGAGACGGTTC---GAATAA-----

-----ATGAATTGGCGATCAGAACGT-----  
ATATGGATAGAAGTTATAACAGGGTCTCGAAAAACAAGTAATTTCTTCTGGGCCTGCATCCTTTTTTTAGGTTCACTAGG  
ATTTTTATTGGTTGGAACCTCCAGTTATCTTGGTAGAAATCTAATATCCTTATTCCC---TCTCAA-----  
CAAATCCCTTTTTTCCACAAAGGATTGTAATGTCTTTCTATGGGATCGCAGGTCTGTTTATTAGTCTCTATTTGTGGTG  
CACAATTTTCGTTGAATGTAGGTAGTGGTTATGATCGATTTCGATAGAAAAGAAGGAATAGTGTATATTTTTCGTTGGGGCT  
TCCCTGGAAAAAATCGTCGCATTTTTCTTAGATTCTTATGAAAGATATCCAGTCCATCCGAATGGAAGTTAAA-----  
-----GAGGGTGTATCCGCGCCCT-----GCCCTTACATGGAAATCAGAGGT-----  
CAGGGAACCATTCTTTGACTCGTACTGATGAGAAT-----TTC---  
ACTTCACGCGAAATGGAACAAAAGCTGCTGAATTGGCCTATTTCTTGAACGTACCC---ATTGAA---GTATTTTGA--  
-----  
-----  
-----

Chloranthus





Citrus

-----  
-----  
-----GATCGTGACCTTGAT-----  
ACGGAGCTGGAGCTTCTAACTATGATGAATGCGCTAACT-----ATCGATATGATGTCGGAA-----  
-----  
ATAGGCCGATTTTATATCACCCCTTCAATTTCGAATTAGCAAAGCAATGTCTCCTTGCATAATATGGATTCCAAACATTCA  
TGATCTGGATGTGAATGAGTCGAAT-----  
TACTTATCCCTCGGTCTATTAGTGAACATCTCTCC-----AGGGATTGTGAAAGATGT---TCCACTAGAAAT---  
ATTCTTGTATTGCTTCGACTCATATTCCTCCAAAAGTGGATCCCCTCTAATAGCCCCGAATAAAATTAATACATGCAT  
TAAGATACGAAGGCTTCTTATTCCACAACAACGAAAGCACTTTTTCACTCTTTCATATACTAGGGGATTTTAC-----  
TTGGAAAAGAAAATGTTCCATACT-----  
AATGGATTTCGGGTCCATAACCATGGGTTCCAATGCACGAGATCTTGTAGCACTTACCAATGAGGCCCTATCGATTAGTAT  
TACACAGAAGAAATCAATTATAGACACTAATACAATTAGATCTGCTCTTCATAGACAAACTTGGGATTTGCGATCC-----  
-----  
CAGGTAAGATCGGTTCAAGATCATGGGATCCTTTTTCTATCAGATAGGGAGGGCTGTTGCACAAAATGTACTTCTAAGTAA  
TTGCCCC-----ATAGATCCTATATCTATCTATATGAAGAAGAAATCG-----TGTAAC---  
GAAGGGGATTCTTATTTGTACAAATGGTACTTTCGAACTT-----  
GGAACGAGCATGAAGAAATTAACGATACTTCTTTATCTTTTGTGTTGTTCTGCCGGATCGGTGCGTCAAGACCTTTGGTC  
TCTACCCGGACCCGATGAAAAAACGGGATCACTTCTTCTGGACTCGTTGAGAAT-----  
GATTCTGATCTAGTCCATGGC-----CTATTA-----GAAGTA-----  
GAAGGCGCT-----CTGGTGGGA-----TCCTCGCGGACA-----  
-----  
-----  
-----GAAAAAGATTGCAGTCGGTTTTGATAATGATCGAGTG-----  
ACATTGCTTCTTCGGCCCGAACCAAGGAATCCCTTAGATATGATGCAAAAAGGATCTTGTCTATCGTT---  
GATCAGAGATTTCTCTATGAAAAATACGAATCGGAGTTTGAAGAA-----  
GGGGAAGGAGAAGGAGTCTC-----GACCCG---CAACAGATAGAGGAGGAT-----TTATTC---  
AATCACATAGTCTGGGCTCCTAGAATATGGCGCCCC---TGGGGCTTTCTA-----  
TTTGATTGTATCGAAAGGCCCAATGAA-----TTGGGATTTCCCTATCGG-----  
-----  
-----  
-----  
GCCGGGTCATTTTCGGGGCAAGCGGATCATTTATGATGAA-----  
AAGGATGAGCTTCAAGAGAATGATTCGGAGTTCTTGCAGAGTAGAACC---ATG---CAGTACCAGACACGAGATAGA--  
----TCTTCCAACGAA-----CAAGGCTTT-----TTTCGAATAAGCCAATTCATTTGGGAACCT-----  
GCGGATCCA---CTCTTTTTTCTATTC---AAAGATCAGCCCCTTGTCTCT-----GTGTTTTCA-----CAC---  
CGAGAATTCTTT-----GCAGATGAAGAGATGTCAAAG--  
-GGGCTTCTT-----ACTTCCAACCA-----GATCCTCCTACATCTATATATAAACGCTGGTTTTATC-----  
AAGAATACGCAAGAAAAG-----CACTTCGAATTGTTGATTCATCGCCAGAGATGGCTT-----AGAACC-----  
AATAGTTTATTATCTAAT-----GGATTTTTCCGTTCTAATACT-----  
CCATCCGAGAGTTATCAGTATTTATCAAATCTGTTCTATCT---  
AACGGAACGCTATTGGATCAAATGACAAAGACATTGTTGAGAAAAAGATGGCTTTTTCCGGATGAAATGAAAATTGGATT  
CATGTAA-----ATGCCTAGATCG-  
--  
CGGATAAACGGAAATTTTATTGATAAGACCTTTTTCGATTGTAGCCAATATATTATTACGAATAATTCCGACAACCTGTAGG  
AGAAAAAGAGGCATTTACCTATTACAGAGATGGT-----ATGTCAGCTCAATCTGAAGGCAATTATGCG---  
GAAGCTTTACAGAATTATTATGAAGCTATGCGACTAGAAATTGATCCTTACGATCGAAGCTATATACTCTATAACATAGG  
CCTTATCCACACAAGTAACGGAGAACATACAAAAGCTTTAGAATATTATTTTCGGGCACTAGAACGAAATCCGTTCTTAC  
CACAAGCTTTTAATAATATGGCTGTGATCTGTCATTACCGGGGGGAACAGGCCGTTTCGACAGGGGAGATTCTGAAATTGCG  
GAGGCTTGGTTCAATCAAGCTGCCGAGTATTGGAACAAGCTATTGCGCTTACTCCTGGTAATTATATTCAAGCGCAGAA  
TTGGTTGAAGATCACGGGACGTTTC---GAA-----  
-----ATGAGTTGGCGATCAGAATAT-----

ATATGGGTAGAATTTATAGCGGGCTCTCGCAAACCAGGCAATTTCTTCTGGGCCTTTATCCTTTTTTTAGGCTCATTAGG  
ATTCTTAGTGGTTGGAATTTCTAGTTATCTTGATAGGAATTTGCTATCTTTATTTCCG---TCGCAG-----  
CAAATCAATTTTTTCCACAAGGGATCGTGATGTCTTTCTACGGGATCGCGGGTCTCTTTATTAGTTCCTATTTGTGGTG  
CACAATTATATGGAATGTAGGTAGCGGTTATGATCGATTTGATACAAAAGAGGGAATAGTGTGTATTTTTCGTTGGGGAT  
TTCTGGAAAAAATCGCCGCATCTTTCTACGATTCCTTATGAAAGATATTCAGTCCATCAGAATAGAAGTTAAA-----  
-----GAGGGTATTTATGCTCGTCTGT-----GTCCTTTATATAGAAAGCAGAGGC-----  
TTGGGGGCCATTCCCTTGAATCGTACTGATGAGAAT-----TTG---  
ACTCCGCGAGAAATTGAGCAAAAGGCTGCGGAATTGGCCTATTTCTTGCCTGTACCA---ATTGAA---GGATTT-----  
-----

Coffea

-----GATCGTGACCTTGAT-----  
ACGGAGCTGGAGCTGCTAACTATGATGAATGCGCTAACT-----ATGGATATGATGCCGGAA-----  
-----

ATAGACCGATTTTATATCACCCTTCAATTGCAATTAGCAAAAGCAATGTCTCCTTGCATAATATGGATTCCAAACATTCA  
TGATCTGGATGTGAATGAGTCGAAT-----  
TACTTATCCCTTGGTCTATTAGTGAACCATCTCTCC-----ATGGATTGTGAAAGATGT---TCCACTAGAAAT---  
ATTCTTGTTATTGCTTCGACTCATATTTCCCAAAAAGTGGATCCTGCTCTAATAGCTCCGAATAAATTAATACGTGCAT  
TAAGATACGAAGGCTTCTTATTCCACAACAACGAAAGCACCTTTTCACTCTTTCATATACTAGGGGATTTTAC-----  
TTGGAAAAGAAAATGTTCCACACC-----  
AATGGATTCCGGTCCATAACCATGGGTTCCAATGCACGAGATCTTGTAGCACTTACCAATGAGGCCCTATCGATTAGTAT  
TACACAGAAGAAATCAATTATAGACACTAATACAATTCGATCCGCTCTTTATAGACAAACTTGGTATTTGCGATCC-----  
-----

CAGGTAAGATCGGTTCCAGGATCATGGGATCCTTTTCTATCAGATAGGAAGGGCTGTAGCACAAAATGTATTTCTAAGTAA  
TTGCCCC-----ATAGATCCTATATCTATCTATATGAAGAAGAAATCA-----TGTAAC---  
GAAGGGGATTTTTATTTGTACAAATGGTACTTTCGAACCT-----  
GGAACGAGCATGAAGAAATTAACGATACTTCTTTATCTTTTGTGTTCTGCGGGATCGGTCCGCCAAGATCTTTGGTC  
TCTACCCGACCCGATGAAAAAATGGGATCACTTCTTATGGACTCGTTGAGAAC-----  
GATTCGGATCTAGTTCATGGC-----CTATTA-----GAAGTA-----  
GAAGGCGCT-----CTGGTGGGA-----TCTTCACGGACA-----  
-----  
-----

-----GAAAAAGATTGCAGTCAGTTTGATAATGATCGAGTG-----  
ACATTGCTTCTTCGGCCCGAACCGAGGAATCCCTTAGATATGATGCAGAGCGGATCTTGTTCTATCCTT---  
GATCAGAGATTTCTCTATGAAAAATATGAATCGGAGTTTGAAGAG-----  
GGGGAGGGGGAAGGAGCCCTT-----GACCCG---CAACAGATAGAGGAGGAT-----TTATTC---  
AATTACATAGTTTGGGCTCCTAGAATATGGCGCCCT---TGGGCCTTTCTA-----  
TTTGATTGTATTGAAAGGCCCAATGAA-----TTGGGATTTCCCTATTGG-----  
-----  
-----

TCCAGGCCATTTTGGGGCAAGCGGATCATTATGATGAA-----  
GAGGATGAGCTTCAAGAGAATGATTCGGAGTTCTTGCAGAAATGGAACC---GTG---CAGTACCAGACACGAGATAGA--  
----TCTTCCAAAGAA-----CAAGGCCCT-----TTTCAATAAGTCAATTCATTTGGGACCCT-----  
GCGGATCCA---CTCTTTTTTCTATTC---AAAGATCAGCCCCCTGGCTCT-----GTGTTTTCA-----CAT---  
CGAGAATTATTT-----GCAGATGAAGAGATGTCAAAG--  
-GGGCTTCTT-----ACTTCCCAAACA-----GATCCTCCTACATCTATATATAAACGCTGGTTTTATC-----  
AAGAATACGCAAGAAAAG-----CACTTTGAATTGTTGATTAATCGTCAGAGATGGCTT-----AGAACC-----  
AATAGTTCATTATCGAAT-----GGATCTTTCCGTTCTAATACT-----  
CTATCCGAGAGTTATCAGTATTTATCAAATCTGTTCCCTATCT---  
AACGGAACGCTATTGGATCAAATGACAAAGACATTGTTGAGAAAAAGATGGCTTTTCCAGATGAAATGAAAATTGGATT  
CATGTAA-----ATGCCTAGATCA-----



GAGGATGAGCTTCAAGAGAATGATTCCGAGTTCTTGCAGAGTGGAAACC---GTG---CAGTACCAGACACGAGATAGC--  
----TCTTCCAAAGAA-----CAAGGCTTT-----TTTCTAATAAACCAATTCATTTGGGATCCT-----  
GCAGATCCACGGTCTTTTTTCTATTCC--AAGGATCATCCTTTTGTCTCTG-----GTGTTTTCA-----CATC--  
CGAGAATTCCTT-----GCAGATGAAGAGATGGCAAAG--  
-GGGCTGCTT-----ACTTCCCAACCA-----  
GCTTTTCTACATCTCTAGAAAAACCTGGTTTATCAATATCAAGAATACGCAAGAAAAG-----  
TACGTGCAATTGTTGATTCATCACCAGAGATGGCTTAAACTAGAACC-----  
AATAGTTCATTATCTAAATCTAAGGGATTTTTCCGTTCTAATACT-----  
CTATCCCAAAGTTATCAGTATTTATCAAATCTGTTCTATCT---  
AACGGAACACTATTGGATCAAATGACAAAGACATTGTTGAGAAAAAGATGGCTTTTCCCGGATGAAATGAAATGA-----

ATGCCTAGATCTGGTGGGATAAATGGAAATTTTATCGATAAGACCTTTTCAATTGTAGCCAATATCTTATTACGAATAAT  
TCCGACAACCTCCGGGGAAAAAGAGGCATTACCTATTACAGAGATGGG-----  
ATGTCGGCTCAATCCGAAGGAAATTATGCG---  
GAAGCTCTACAGAATTATTATGAAGCTATGCGACTAGAAATCGATCCCTATGATCGAAGTTATATACTCTATAACATAGG  
TCTTATCCACACAAGGAACGGAGAACATACGAAAGCTTTGGAATATTATTTTCGGGCACTAGAACGAAACCCGTTCTTAC  
CACAAGCTTTTAATAATATGGCTGTGATCTGTCTATTACCGGGGAGAACAGGCCATTTCGACAGGGGAGATTCTGAAATTGCG  
GAGGCTTGGTTCAATCAAGCCGCTGAGTATTGGAACAAGCTATAGCGCTTACTCCCGGTAATTATATTGAAGCCCAAAA  
TTGTTGAAGATCACAAGGCGTTTC---AAA-----

-----ATGACATTGGCGATCAGAACG-----  
TATATGATAGGATTTCTAAGAGGATCTCGAAAAATCAGCAATTTCTGCTGGGCCTTTATCCTTTTTTTAGGTTCCATTAGG  
GTTTTTATTGGTTGGAACCTCCAGTTATCTTGGTAGGGATTTGATACCTTTATTTCCG---TCTCAG-----  
CAAATAATTTTTTTTCCACAGGGGATCGTAATGTCTTTCTATGGGATTGCCGGTCTCTTTATTAGCTCCTATTTGTGGGG  
CACAATTTTGTGGAATGTAGGTAGCGGTTATGATCGATTTCGATAGAAAAGAAGAAATAGTGTCTATTTTTCGTTGGGGGT  
TTCTGGAAAAATCGTCAATCTTCTACGATTCTTATGAAAGACATTTCAGTCCATCAGAATAGAAGTTAAA-----  
-----GAGGGTATTTATGCACGTCGT-----GTCCTTTATATGGAATAAGAGGC-----  
CAAGGGGCCATTCCCTTGACTCGTACAGATCAGAAT-----CTG---  
ACCCACAGAAAATTGAGCAAAAGGCTGCCGAATTGGCCTATTTCTTGCCTGTACCA---ATTGAA---GTTTTT-----

Daucus

-----GATCGTGACCTTCAT-----  
ACGGAGCTGGAATTG-----CTAACT-----ATGGATATGATGTGCGAA-----

AAAGATCGATTTTATATCACCCTTCAATTCGAATTAGCAAAAGCAATGTCTCCTTGCATAATATGGATTCCAAACATTCA  
TGATCTGGATGTGAATGAGTCAAAT-----  
TACTTCTCCCTCGGTCTATTAGTGAACCATCTCTCC-----AGGGATTGTGAAAGGTGT---TCCACTAGAAAT---  
ATTCTTGTATTGCTTCGACTCATATTTCCCAAAAAGTGGATCCCGCTCTAATAGCTCCGAATAAATTAATACGTGCAT  
TAAGATACGAAGGCTTCTTATTCCACAACAACGAAAGCACTTTTTACCCTTTTCATATACTAGGGGATTTCCG-----  
TTGGAAAAGAAAATGTTCCATACT-----

AATGGATTCCGGTCCATAACCATGGGTTCCAATGCACGAGATCTTGTAGCACTTACCAATGAGGCCCTGTGATTAGTAT  
TACACAGAAGAAATCAATTATAGACACTAATACAATTAGATCCGCTTTTCATAGACAAACTTGGGATTTGCGATCC-----

CAGGTAAGATCGGTTCAGGATCATGGGATCCTTTTCTATCAGATCGGAAGGGCTGTAGCACAAAATGTACTTCTAAGTAA  
TTGCCCC-----ATAGATCCTATATCTATCTATATTAAGAAGAAATCA-----TGTAAC---  
GAAGGGGATTCCTATTTGTACAAATGGTACTTTCGAACCT-----  
GGAAGTACGATGAAGAAATTAACGATACTTCTTTATCTTTTGTGTTGTTCCGCCGGATCGGTGCGTCAAGATCTTTGGTC  
TCTACCCGGACCCGATGAAAGAAATGGGATCACTTCTTATGGACTCGTTGAGAAT-----  
GATTCTGATCTAGTTCATGGC-----CTATTA-----CAAGTA-----  
GAAGGCGCT-----CTGGTGGGA-----TCCTCGCGGACA-----

-----GAAAAAGATTGCAGTCAGTTTGATAATGATCGAGTG-----  
ACATTGCTTCTTCGGCCCGAACCAAGGAATCCCTTAGATATGATGCAAAACGGATCTTGTCTATCCTT---

GATCAGAGATTTCTCTATGAAAAAACGAATCGGAGTTTGAAGAA-----GGGGAA-----  
GGGGCTCTC-----GACCCG---CAACAGATAGAGGAGGAT-----TTATTT---  
AATCACATAGTTTGGGCTCCTAGAATATGGCACCT---TGGGGCATTCTA-----  
TTTGATTGTATCGAAAGGCCCAATGAA-----TTGGGATTTCCCTATTGG-----

TCCAGGTCATTTTCGGGGCAAGCGGATCCTTTTATGATGAA-----  
GAGGATGAGCTTCAAGAGAATGATTCGGAGTTCTTGCAGAGTGGAAACC---ATG---CAGTACCAGACACGAGATAGA--  
---TCTTCCAAAGAA-----CAAGGCTTT-----TTTCGAATAAGCCAATTCATTTGGGACCCT-----  
GCAGATCCA---CTCTTTGTCCTATTC---AAAGATCAGTCCTCTGTCTCT-----GTGTTTTCA-----CAT---  
CGAGAATTATTT-----GCAGATGAAGAGATGTCAAAG--  
-GGGCTTCTT-----ACTTCCCAAACA-----GATCCTCTACATCTATATATAAACGCTGGTTTTATC-----  
AAGAAGACGCAAGAAAAG-----CACTTTGAATTGTTGATTAATCGCCAGAGATGGTTT-----AGAACC-----  
ACTAGTTCATTATCTAAT-----GGATCTTTCCGTTCTAATACT-----  
CTATCCGAGAGTTATCAGTATTTATCAAATCTATTCCCTATCT---  
AACGGAACTCTATTGGATCAAATGACAAAGACATTATTGAGAAAAAGATGGCTTTTCCCGGATGAAATGAAAATTGGATT  
CATGGAACAGGAGAAAGATTTCCCATTCCTTAGCCGGAAGTTATGTGGCCATGA-----ATGCCTAGATCG--  
--

CGGATAAATGGAAATTTTATTGATAAGACCTTTTCAATTATAGCCAATATCTTATTACGAATAATTCCGACAACCTTCAGG  
AGAAAAAGAGGCATTTACCTATTACAGAGATGGT-----ATGTCGGCTCAATCCGAAGGAAATTATGCG---  
GAAGCTTTACAGAATTATTATGAAGCTATGCGACTAGAAATTGATCCCTATGATCGAAGTTATATACTCTATAACATAGG  
ACTTATCCACACAAGTAACGGAGAACATACGAAAGCTCTGGAATATTATTTCCGAGCGCTAGAACGAAATCCGTTCTTAC  
CACAAGCTTTTAATAATATGGCTGTGATCTGTTCATTACCGGGGAGAAACAAGCCATTTCGACAGGGAGATTCTGAAATTGCG  
GAGGCTTGGTTCGATCAAGCCGCTGAGTATTGGAAACAAGCTATAGCGCTTACTCCTGGTAATTATATTGAAGCGCATAA  
TTGGTTGAAGATCACTAGGCGTTTC---GAA-----

-----ATGAGTTGTCGATCAGAACAT-----  
ATATGGATACAACCTATAACGGGATCGCGAAAAACAAGTAATTTATGCTGGGCCATTATCCTTTTTTTTAGGTTTATTAGG  
ATTCTTATTGGTTGGAACCTTCCAGTTATCTTGGGAGAACTTGATATCTTTATTTCCG---TCTCAG-----  
CAAATCCTTTTTTTTTCCACAAGGGATTGTGATGTCTTTCTATGGGATCGCGGGTCTCTTTATTAGCTCCTATTTGTGGTG  
CACAATTTTCGTGGAATGTAGGGGGTGGTTATGATCGATTTCGATAGAAAAGAAGGAATGGTGTGTCTTTTTTCGTTGGGGAT  
TCCCTGGAAAAAATCGTCGCATCTTCTACGATTCTTATAAAGGATATTTCAGTCCGTCAGAATAGAAGTTAAA-----  
-----GAGGGTATTTATGCTCGCCGT-----GTCCTTTATATGGATATCAGAGGC-----  
CAGGGGGCCATTCCCTTGACTCGTACTGATGAGAAT-----GTT---  
ACTCCACGGGAAATCGAACAAAAAGCTGCTGAATTGGCCTATTTCTTGCCTGTACCA---ATTGAA---GTATTT-----

Dioscorea

-----  
-----  
-----  
-----  
-----  
-----  
-----  
-----  
-----  
-----  
-----  
-----  
-----  
-----  
-----  
-----  
-----  
-----  
-----  
-----  
-----  
-----

-----ATGCCTAGATCT-----

CAGATAAATGGAAATTTTATTGATAAGACCTCTTCAATTGTAGCCAATATCTTATTACGAATAATTCCGACAACCTTCAGG  
AGAAAAAAGGCATTTACTTATTACAGAGATGGTGCATGATT---ATGTCAGCTCAATCGGAAGGAAATTATGCG---  
GAAGCTTTACAGAATTATTATGAAGCTACACGATCAGAAATTGATCCCTATGATCGAAGTTATATACTCTATAACATAGG  
CCTTATACACAAGCAACGGAGAGCATACAAGGCTTTGGAATATTATTTCCAGGCAATAGAACGAAATCCATTCTTAC  
CGAAGCTTTTAATAATATGGCCGTGATCTGTCATTACCAGGGAGAACGGGCCATTCTACGGGGTGATTCTGAAATTGCA  
GAGGCTTGGTTCGATCAGGCTGCTGAGTATTGGAAACAGGCTATAGGGCTTACCCAGGTAATTATATTGAAGCACATAA  
TTGGTTGAAGATTACGAGACGTTTA---GAATTCGAA---

-----ATGAACTGGCGATCAGAACAT-----

ATATGGATAGAACTTATAACGGGGTCTCGAAAAACAAGTAATTTTTGCTGGGCCTGTATCCTTTTTTTTAGGTTCACTAGG  
ATTCTTAGTGGTGGAACTTCCAGTTATCTTGGTAGGAATCTGATATCTGTATTTCCA---TCCCAG-----  
CAAATCATTTTTTTCCACAAGGTATTGTCATGTCTTTCTATGGGATTGCGGGACTATTTCATTAGCTCCTATTTGTGGTG  
CACAATTTTCGTGGAATGTAGGTAGTGGTTATGACCGATTTCGATAGAAAAGAAGGAATAGTGTGATTTTTTCGTTGGGGAT  
TTCCGGGAATAAATCGCCGCATCTTCTTCGCTTCTTATGCGAGATATCCAATCAATCAGAATGCAGGTTAAA-----  
-----GAGGGTCTTTATCCTCGTCGT-----GTCCTTTATATGGAAATCAGAGGC-----

CAAGGAGCCATTCCCTTGACTCGTACTGATGAGAAT-----TTT---  
ACTCCACGAGAAATTGAACAAAAGCTGCTGAATTGGCCTATTTCTTGGCGGTACCG---ATTGAA---  
GGAAAAAGAAAC-----

Drimys

-----GATGATGACCTTGAT-----ACG-----

GAGCTGCTAACTATGACGAATGTGCTAACT-----ATGTATATGACGCCGAAA-----

ATAGACCTATTTGATATCACCCCTCAATTAGAATTAGCAAAAGCAATGTCCCCTTGCATAATATGGATTCCAAACATTCA  
TGATCTGTATGTGAATGAGTCGAAT-----  
TACTTATCCCTCGGCCTATTAGTGAATCTCTCTCC-----AGAGATTGTGAAAGATGT---TCCACTAGAAAT---  
ATTCTTGTTATTGCTTCGACTCATATTCGCCAAAAGTGGATCCCGCTCTAATAGCTCCGAATAAATTAATACATGCAT  
TAAGATACGAAGGCTTCTTATTCCACAACAACGAAAGCACTTTTTTCATTCTTTTATATACTAGGGGATTTTCGC-----  
TTGAAAAGAAATGTCCCATACT-----

AACGGATTCCGGTCCATAACCATGGGTTCCAATGCACGAGATCTTGTAGCACTTACCAATGAGGCCCTATCAATTAGTAT  
TACACAGAAGAAATCAATTATAGACACTAATAAATTAGATCAGCTCTTCATAGACAAACTTGGGATTTGCGATCC-----  
-----

GAGGTAAGATCGGTTCAGGATCATGGGATCCTTTTCTATCAGATAGGAAGGGCTGTTGCACAAAATGTACTTCTAAGTAA

TTGCCCC-----ATAGATCCTATATCTATCTATATGAAGAAGAAATCA-----TGTAAG---  
GAAGGGGATTCTTATTTGTACAAATGGTACTTTCGAATT-----  
GGAACGAGCATGAAGAAATTAACGATACTTCTTTATCTTTTGAGTTGTTCTGCCGGATCGGTGCTCAAGATCTTTGGTC  
TCCACCCGGACCCGATGAAAAAATGGGATCACTTCTTATGGATTTCGTTGAGAAT-----  
GATTCTGATCTAGTTCATGGC-----CTATTA-----GAAGTA-----  
GAAGGCGCT-----CTGGTGGGA-----TCCTCACGGACA-----  
-----  
-----  
-----  
-----  
-----

-----GAAAAAGATTGCAGTCAGTTTGATAATGATCGAGTG-----  
ACATTGCTTCTTCGGTCCGAACCAAGGAATCCGTTAGATATGATGCAAAATGGATCTTGTTCATCGTT---  
GATCAGAGATTTCTATACGAAAAATACGAATCGGAGTTTGAAGAA-----  
GGGGAAGGAGAAGGAGCCCTC-----GACCCG---CAACAGATAGAGGAGGAT-----TTATTC---  
AATCACATAGTTTGGGCTCCTAGAATATGGCGCCCT---TGTGGCAATCTA-----  
TTTGATTGTATCGAAAGGCCCAATGAA-----TTGGGATTTCCCTATTGG-----  
-----  
-----  
-----  
-----  
-----

GCCAGGTCATTTCCGGGCAAGCGGATCATTATCATAAA-----  
GAGGATGAGCTTCAAGAGAATGATTCGGAGTCTTGCAGAGTGGAAACC---ATG---CAGTACCAGACACGAGATAGA--  
----TCTTCCAAAGAA-----CAAGGCTTT-----TTTCGAATAAGCCAATTCATTTGGGACCCT-----  
GCAGATCCA---TTCTTTTTTCTATTC---AAAGATCAGCCCTTTGTCTCT-----GTGTTTTCA-----CGT---  
CGAGAATTCCTT-----GCAGATGAAGAGATGTCAAAG--  
-GGGCTTATT-----ACTTCCCAAACA-----AATCCTCTACATCTATATATAAACGCTGGTTTCATC-----  
AAGAATACGCAAGAAAAG-----CACTTCGAATTGTTGATTCATCGCCAGAGATGGCTT-----AGAACC-----  
AATAGTTTCATTATCTAAT-----GGATCTTTCCGTTCTAATACT-----  
CCATCCGAGAGTTATCAGTATTTATCAAATCTGTTCTATCT---  
AACGGAACGCTATTGGATCAAATGACAAAGGCATTGTTGAGAAAAGAGATGGCTTTTCCCGGATGAAATGAAACATTTGAT  
TCATGTAACAGGAGAAAGATTTCCCATTCTTAG-----ATGCCTAGATCT-  
--

CGGATAAATGGAAATTTTATTGATAAGACCTCTTCAATTGTAGCCAATATCTTATTACGAATAATTCCGACAACCTCAGG  
AGAAAAAGAGGCATTTACCTATTACAGAGATGGG-----ATGTCAGCTCAATCCGAAGGAAATTATGCG---  
GAAGCTTTACAAAATTATTATGAAGCTATGCGACTAGAAATTGATCCCTATGATCGAAGTTATATACTCTATAACATAGG  
CCTTATCCACACAAGCAACGGAGAACATACGAAGGCTTTGGAATATTATTTCCGGGCACTCGAACGAAACCCATTCTTAC  
CACAAGCTTTTAATAATATGGCCGTGATCTGTCAATTACCGGGGAGAACAGGCCATTTCGACAGGGGAGATTCTGAAATTGCA  
GAGGCTTGGTCCGATCAAGCTGCTGAATATTGGAACAAGCTATAGCGCTTACTCCAGGTAATTATATTGAAGCACATAA  
CTGTTGAAGATCACACGACGGTTC---GAA-----  
-----  
-----ATGAACTGGCGATCAGAACGT-----  
-----

ATATGGATAGAACTTATAACGGGGTCTCGAAAAATAAGTAATTTCTGCTGGGCCTGTATCCTTTTTTTAGGTTGCTAGG  
ATTCTTATTGGTTGGAACCTCCAGTTATCTTGGTAGGAATTTGATATCCTTATTCCC-----TCTCAG-----  
CAAATCATTTTTTTCCACAAGGGATCGTGATGTCTTTTTATGGGATCGCGGTCTGTTCATTAGTTCTTATTTGTGGTG  
CACAATTTCTGTTGAATGTGGGTAGTGGTTATGATCGATTTCGATAGAAAAGAAGGAGTCGTGTGTATTTTTCTGTTGGGGAT  
TTCTTGAATAAATCGTCAATCTTCTTCGATTTCTTATGAGAGATATCCAGTCGATCAGAATGGAAGTTAAA-----  
-----GAGGCGCTTTATTCCCCTCGT-----GTCCTTTATATGGAAATTAGAGGC-----  
CAGGGAGCTATCCCCTTGACTCGAACTGATGAGAAT-----TTG---  
ACTCCACGAGAAATTGAACAAAAGCTGCCGAATCGGCCTATTTCTTGCGGTACCA---ATTGAA---GTATTT-----  
-----  
-----

Eucalyptus -----  
-----  
-----  
-----  
-----

-----GATCGTGACCTTGAT-----  
ACGGAGCTGGAGCTTCTAAGTAGGATGAATGCGCTAACT-----ATGGATATGATGCCGGAA-----  
-----  
-----  
ATAGACCGATTTTATATTACCCTTCAATTCGAATTAGCAAAGCAATGTCTCCTTGATAATATGGATTCCAAACATTCA

TGATCTGGATGTGAATGAGTCGAAT-----  
TACTTATCCCTCGGTCTATTAGTGAACATCTCTCC-----AGGGATTGTGAAAGATGT---TCCAACAAAAT---  
ATTCTTGTTATTGCTTCGACTCATATTCGCCAAAAGTGGATCCCCTCTAATAGCTCCGAATAAAATTAATACATGCAT  
TAAGATACGAAGGCTTCTTATTCACAACAACGAAAGCACTTTTTCACCCCTTCATATACTAGGGGATTTCCAC-----  
TTGGAAAAGAAGATGTTCCATACT-----  
AATGGATTCCGGTCCATAACCATGGGTTCCAATGTACGAGATCTTGTAGCAGCTTACCAATGAGGCCCTATCGATTAGTAT  
TACACAAAAGAAATCAATTCTAGACACTAATACAATTAGATCTGCTCTTCATAGACAAAATTGGGATTTGCGATCC-----  
-----  
CAGGTAAGATCGGTTTCAGGATCATGGGATCCTTTTTCTATCAGATAGGAAGGGCTGTTGCACAAAATGTACTTCTAAGTAA  
TTGCCCC-----ATAGATCCTATATCTATCTATATGAAGAAGAAATCA-----TGTAAC---  
GAAGGGGATTTCTTATTTGTACAAATGGTACTTTCGAACTT-----  
GGAACGAGCATGAAGAAATTAACGATACTTCTTTATCTTTTGAGTTGTTCTGCCGGATCGATCGTCAAGACCTTTGGTC  
TCTACCCGGACCCGATGAAAAAATGAGATCACTTCTTATGGACTCGTTGAGAAT-----  
GATTCTGATCTAGTTCATGGC-----CTATTA-----GAAGTA-----  
GAAGGCGCT-----CTGGTGGGA-----TCCTCGCGGACA-----  
-----  
-----  
-----  
-----  
-----GAAAAAGATTACAGTCAGTTTGATAATGATCGAGTG-----  
ACATTGCTTCTTCGGCCCAAACCAAGGAATCCCTTAGATATGATGCAAAATGGATCTTGTTCATCGTT---  
GATCAGAGATTTCTCTATGAAAAATACGAATCGGAGTTTGAAGAA-----  
GGGGAAGGAGAAGGAGTCCTC-----GACCCG---CAACAGATAGAGGAGGAC-----TTATTC---  
AATCACATAGTTTGGGCTCCTAGAATATGGCGCCCT---TGGGGCTTTCTA-----  
TTTGATTGTATCGAAAGGCCCAATTCA-----TTGGGATTTCCCTACTGG-----  
-----  
-----  
-----  
-----  
-----  
-----GCCAGGTCATTTTCGGGGCAAGCGGATCATTTATGATGAA-----  
AAGGAGGAGCTTCAAGAGAATGATTTCGAGTTTCTTGCAGAGTGGAAACC---ATG---CAGTACCAGACACGAGATAGA--  
-----TCTTCCAAAGAA-----CAAGGCTTT-----TTTCGAATAAGCCAATTCATTTGGGACCCT-----  
GCAGATCCA---CTCTTTTTCTATTC---AAAGATCAGCCCTTTGTCTCT-----GTGTTTTCA-----CAT---  
CGAGAATTCTTT-----GCAGATGAAGAGATGTCAAAG--  
-GGGCTTCTT-----ACTTCCCAAACA-----GATTCCCTACATCTATATAAAACGCTGGTTTTATC-----  
AAGAATACGCAAGAAAAG-----CACTTCGAATTGTTGATTTCATCGCCAGAGATGGCTT-----AGAACC-----  
AATAGTTCATTATCTAAT-----GGATTTTTCCGTTCTAATACT-----  
CCATCCGAGAGTTATCAGTATTTATCAAATCTGTTCCCTATCG---  
AACGGAAGGCTATTGGATCAAATGACAAAGACATTGTTGAGAAAAAGATGGCTTTTCCCGGATGAAATGAAATCGGATT  
CATGTAA-----ATGCCTAGATCG-  
--  
AGGATAAATGGAAATTTTATTGATAAGACCTTTTTCAATTGTAGCCAATATCTTATTACGAATAATTCCGACAACTTCAGG  
AGAAAAAGAGGCATTTACCTATTACAGAGATGGG-----ATGTCGGCTCAATCCGAAGGAAATTATGCG---  
GAAGCTTTACAGAATTATTATGAAGCTATGCGACTAGAAAATTGATCCCTATGATCGAAGCTATATACTCTATAACATAGG  
CCTTATCCACACAAGTAACGGAGAACATACGAAAGCTTTGGAATATTTTTCGGGCACTAGAACGAAACCCGTTTTTAC  
CACAAGCTTTTAAATAATATGGCTGTGATCTGTCAATACCGGGGAGAGCAGGCCATTCGACAGGGGGATTCTGAAATTGCG  
GAGGCTTGTTTCGATCAAGCCGCTGAGTATTGGAACAAGCTATAGCGCTTACTCCTGGTAATTATATTGAAGCGCAGAA  
TTGGTTGAAGATCACGAGACGTTTC---GAA-----  
-----ATGAGTTGTGCATCAGAACAT-----  
ATATGGATAGAACTTATAGTGGGGTCTCGAAAATAAGTAATTTCTGCTGGGCCTTTATCCTTTTTTTAGGTTCACTAGG  
ATTTCGTATTAGTTGGATCTTCCAGTTATCTCGGTAAGAATTTGATATCTTTAGTTCCG---TCTCAA-----  
CAAATTCTTTTTTTTCCACAAGGGATCGTGATGTCTTTCTACGGTATCGCAGGTCTCTTTATTAGTTCCTATTTGTGGTG  
CACAATCTCGTGGAATGTAGGTAGTGGCTATGATCGATTTCGATAGAAAAGAAGGAATAGTGTGTATTTTTCGTTGGGGAT  
TTCTTGAAAAAATCGTCGCATCTTTCTACGATTTTCGATGAAAGATATTCAGTCCATCCGAATCGAAGTTAAA-----  
-----GAGGGTATTTCTGCTCGTCTGCT-----GTCCTTTATATGGAATCAAAGGA-----  
CAGGGGGCCGTTCCCTTGACGCGTACTGATGAGAAT-----TTG---



ACTCCACGTGAAATTGAGCAAAAAGCCGCCGAATTGGCCTATTTCTTGCGCGTACCG---ATTGAA---GTATTT-----

Ginkgo

-----ATGCCTAGATCT---  
CAGAGAAATGACAATTTTCATCGATAAAACCTTCACAATTGTAGCGGATATCTTGTTGCAAATAATTCCGACAGCTCCAGG  
GGAGAAAAGAGGCATTTACCTATTACAGAGATGGTGTG-----ATGTCAGCCCAATCCGAAGGAGAATATGCG---  
GAAGCTTTGCAAATTTATTATGAAGCTATGCGGCCGGAATTTGACCCTTATGATCGAAGTTATATACCCTATAATATAGG  
TCTTATCCACACGAGTAATGGGGAACATGCCAAGGCTTTGGAATATTATTTTCAGGCATTAGAACGAAATCCATCCTTAC  
CACAAGCTCTGAATAATATGGCCGTGATCTGCCATTACCGGGGAGAACAGGCCATCCGACAGGGAGATCCTGAAACTGCG  
GAGGCTTGGTCCAATCGAGCTGCTGAGTATTGGAACAAGCTATAACGCTTGCTCCAGGCAATTACATTGAAGCACAAAA  
TCGGTTAAATATTACAGGACGCTTTGGAGAA-----  
-----ATGAATTGGCGATCCGAATGG-----  
CTCTGGATAGAACCTATAACAGGGTCTCGAAAAACAAGTAATTTTTGCTGGGCCCGTATTCTTTTTTTTTGGTTCACTAGG  
ATTTCTCTTGGTCCGAATTTTCGAGTTATCTTGGTAGGAATCTTATACCCCTATTGTGG---TCTCAA-----  
CAAATCCTTTTTGTTCCACAAGGAATTGTAATGTGTTTTTATGGTATTGCAGGTCCGTTTCATCAGCTCTTATTTGTGGTG  
TACAATTTTCGTGGGATGTGGGTAGTGGTTACAATAAGTTTATGATGAGAAAGAAGGAATCGTATGTCTCTTTTCGTTGGGGAT

TTCCCGGAGGAAATCGTCTGATTTTTCTCCGATTTTTGATAAAGGATATCCAGGCGATCAAAATGGAAGTTCAA-----  
-----GGAGGTATTTATCCCCGGCGT-----GTTCTTTATATGGAAATAAAAGGC-----  
CAGCAATACATTCCCTTAACTCGTACTGATGATAAT-----TTG---  
ACCCACGGGAAATGGAGCAAAAAGCTGCTGAATTAGCCCGTTTCTTGCGTGTATCG---ATTGAA---GGATTT-----  
-----

Glycine -----  
-----  
-----

-----GACCGTGACCTTGAT-----  
ATGGAGCTGGAGCTTCTAACTATGATGAATACGCTAACT-----ATGGATATGATGCCAGAA-----  
-----

ATAGACCGATTTTTATATCACCTTTCAATTCGAATTAGCAAAAGCAATGTCTCCTTGCATAATATGGATTCCAAACATCCA  
TGATCTGGATGTGAATGAGTCGAAT-----  
TACTTATCCCTCGGTCTTTTAGTGAACATCTCTCC-----AGGGATTGTGAAAGATGT---TCTACTAGAAAT---  
ATTCTTGTTATTGCTTCGACTCATATTTCCCAAAAAGTAGATCCGGCTCTAATAGCTCCGAATAAATTAATACATGCAT  
TAAGATACGAAGGCTTCTTATTTACAACAACGAAAACACTTTTTCACTCTTTCATATACTAGGGGATTTTAC-----  
TTGGAAAAGAAAATGTCCCATACT-----  
AATGGATTCCGGTCCACAACGATGGGTTCAAATGTACGAGATCTTGTAGCACTTACCAACGAGGCCCTATCGATTAGTAT  
TATACAAAAAATCCATCATAGACACTAATATAATTAGATCTGTTCTTCATAGACAAACTTGGGATTTCCGATCT-----  
-----

CAGGTAAGATCGGTTCAGGATCATGGGATCCTTTTTCTATCAGATAGGAAGGGCTGTTTACAAAATGTACTTCTAAGTAA  
TTGCTCC-----ATAGATCCTATATCTATCTATATGAAGAAGAAATCA-----TGTGAC---  
GGGGGGGATTCTTATTTGTACAAATGGTACTTTCGAACTT-----  
GGAACGAGTATGAAGAAATTAACGATACTTCTTTACCTTTTGAGTTGTTCTGCCGGATCGGTCGCTCAAGACCTTTGGTC  
TCTACCCGGACCTGATGAAAAAATGGGATCACATCTTATGGACTCGTTGAGAAT-----  
AATTCTGATCTAGTTCATGGC-----CTATTA-----GAAGTA-----  
GAAGGCGCT-----CTGGTGGGA-----TCCTCACGTACA-----  
-----  
-----  
-----

-----GAAAAAGATTGCAGTCAGTTTGATAAGGATCGAGTG-----  
ACATTGCTTCTTCGGTCCGAACCAAGGAATCCCTTAAATATGATTCAAAATGGATCTTATTCTATCGTT---  
GATCAGAGATTTCTCTATGAAAAATATGAATCGGAGTTTGAAGAA-----GGGGGG-----  
GGAGTCCTC-----GACCCA---CAACAGATAGAGGAGGAT-----TTTTTC---  
AATCACATCGTTTGGGCTCCTAGAATATGGAGCCCT---TGGGGCTTTCTA-----  
TTTTATTGTATTGAAAGGCCCAATGAA-----TTGGGATTTCCCTATTGG-----  
-----  
-----  
-----

GCCAGGTCATTTCCGGACAAGCGGATCATTATGATGAA-----  
GAGGATGAGCTTCAAGAGAATGATTGAGAGTTCTTGCAGGGTGAACC---ATG---CAGTACCAGACACGAGATAGA--  
---TCTTCCAAAGAA-----CAGGGCTTT-----TTTCGAATAAGCCAATTCATTTGGGACCCC-----  
GCGGATCCA---CTCTTTTTCTATTCT---AAAGATCAGCCTTTTGTCTCT-----GTGTTTTCA-----CAT---  
CGACAATTCCTT-----ACAGATGAAGAGATGTCAAGG--  
-GAACTTCTT-----ACTTCCCAAACA-----GATCTTCTACATCTATATATAAACTGGTTTATC-----  
AAGAATACGCAAGAAAAG-----CATTTTGAATTGTTGATTGATTGCCAGAGATGGCTT-----AGAATC-----  
AATAGTTCATTATCTAAT-----GGATTTTTCCGTTCTAATACT-----  
CTATCTGAGAGTTATCAATATTTATCAAATCTGTTCTATCT---  
AACGAAGCGCTATTGGATCAAATGACAAAGACATTGTTGAGAAAAAGATGGCTTTTCCAGATGAGATGGTTGTTGCTAT  
CTGCTCCAATAACGAATCATTGGTTTAA-----ATGCCTAGATCT--  
--

CGGATAAATGAAAATTTTATTGATAAAACCTTTTCAATTGTAGCCAATATCTTATTACGAATAATTCGACAACCTTCGGG  
AGAAAAAAGGGCATTCACTTATTACAGAGATGGT-----ATGTCAGCTCAATCTGAAGGAAATTATGCG---  
GAAGCTTTACAGAATTATTATGAGGCTATGCGACTGGAATTTGATCCCTATGATCGAAGTTATATACTTTATAACATAGG

CCTTATCCACACAAGTAACGGAGAACATACTAAAGCTTTGGAATATTATTTTCGGGCGCTCGAGCGAAACCCATTCTTAC  
CCCAAGCTTTTAATAATATGGCCGTGATCTGTCATTACCGAGGAGAACAGGCCATTTCGACAGGGAGACTCGGAAGTTGCG  
GAGTCTTGGTTTAATCAAGCCGCTGAATATTGAAAACAAGCTATAGCCCTAACCCCTGGTAATTATATTGAAGCCCAGAA  
TTGGTTGAAGATCACAGGACGTTTT---GAA-----

Gossypium

-----GATCGTGACCTTGAT-----  
ACGGAGCTGGAGCTTCTAACTATGATGAATGCGTTAACT-----ATGGATATGATGTCGGAA-----

ATAGACCGATTTTATATCACCCCTTCAATTCGAACTAGCAAAAGCAATGTCTCCTTGCATAATATGGATTCCAAACATTCA  
TGATCTGGATGTGAATGAGGCGAAT-----  
TACTTATCCCTCGGTCTATTAGTGAACCTATCTCTCC-----AAGGATTGTGAAAGATGT---TCCACTAGAAAT---  
ATTCTTGTATTGCTTCGACTCATATTCCTCAAAAAGTGGATCCCCTCTAATAGCCCCGAATAAATTAATACATGTAT  
TAAGATACGAAGGCTTCTTATTCCACAACAACGAAAGCACTTTTTCACTCTTTCATATACTAGGGGATTTTCAC-----  
TTGAAAAGAAAATGTTCCATACT-----  
AATGGATTCCGGTCCATAACCGTGGGTCCAATGCACGAGATCTTGTAGCACTTACCAATGAGGCCCTATCGATTAGTAT  
TACACAGAAGAAATCAATTATAGACACTAATACAATTAGATCTGCTCTTCATAGACAAAACCTGGGATTTGCGATCC----

CAGGTAAGATCGGTTTCAGGATCATGGGATCCTTTTTCTATCAGATAGGAAGGGCTGTTGTACAAAATGTACTTCTAAGTAA  
TTGCCCC-----TTAGATCCTATATCTATCTATATGAAGAAGAAATCA-----TGTAAC---  
GAAGGGGATTCTTATTTGTACAAAATGGTACTTCGAGCTT-----  
GGAACGAGCATGAAGAAATTAACGATACTTCTTTATCTTTTGTGTTCTGCCGGATCGGTCGCTCAAGACCTTTGGTC  
TCTACCCGGACCCGATGAAAAAATGGGATCACTTCTTATGGGTTTCGTTGAGAAT-----  
GATTCTGATCTAGTTCATGGC-----CTATTA-----GAAGTA-----  
GAAGGCGCT-----CTGGTGGGA-----TCCTCACGGACA-----

-----GAAAAAGATTGCGGTCAGTTTGATAATGATCGAGTG-----  
ACATTGCTTCTTCGGTCCGAGCCGGGGAATCCCTTATATATGATGCAAAATGGATCTTGTCTATCGTT---  
GATCAGAGAAATCTCTATGAAAAATACGAATCGGAGTTTGAAGAA-----  
GGGGAAGGAGAAGGAGTACTC-----GACCCG---CAACAGATAGAGGAGGAT-----TTATTC---  
AATCACATAGTTTGGGCTCCTAGGATATGGCGCCCT---TGGGGCTTTCTA-----  
TTTGATTGTATCGAAAGGCCAAATGAA-----TTGGGATTTCCCTATTGG-----

-----GCCGGTCAATTTCCGGGCAAGCGGATCATTATGATGAA-----  
AAGGATGAGCTTCAAGAGAATGATTCGGCGTTCTTGCAGAGTGGAACC---ATG---CAGTACCAGGCACGAGATAGA--  
---TCTTCCAAAGAA-----CAAGGCTTT-----TTTCGAATAAGCCAATTCATTTGGGATCCT-----  
GCGGATCCA---CTCTTTTTCTTATTC---AAAGATCAGCCCTTTGTCTCT-----GTGTTTTCA-----CAC---  
CGAGAATTTCTT-----GCAGATGAAGAGATGTCAAAG--  
-GGGCTTCTT-----ACTTCCCAAACA-----GATCCTCCTACATCTATATATAAACGCTGGTTTTATC-----  
AAGAATACGCAAGAAAAG-----CACTTCGAATTATTGATTCATCGCCAGAGATGGCTT-----AGAACC-----

AATAGTTCATTATCTAATGCTAATGGATTTTTCCGTTCTAATACT-----  
CCATCCGAGAGTTATCAGTATTTATCAAATCTGTTCTATCT---  
AACGGAAGACTATTGGATCAAATGACAAAGACATTGTTGAGAAAAAGATGGCTTTTCCCGGATGAAATGAAAATTGGATT  
CATGTAA-----ATGCCTAGATCG-

CAGATAAATGGAAATTTTATTGATAAGACCTTTTCAATTGTAGCCAATATCTTATTACGAATAATTCCGACAACCTTCAGG  
AGAAAAAGAGGCATTTACTTATTACAGAGATGGT-----ATGTCGGCTCAATCCGAAGGAAATTATGCG---  
GAGGCCTTACAGAATTATTATGAAGCTATGCGACTAGAAAATTGATCCCTATGATCGAAGTTATATACTATATAACATAGG  
CCTTATCCACACAAGTAATGGAGAGCATACAAAAAGCTTTAGAATATTATTTTCGAGCACTAGAACGAAACCCGTTCTTAC  
CACAAGCTTTTAATAATATGGCTGTGATCTGTCTATTACCGGGGAGAACAGGCCATTTCGACAGGGGGATTCTGAAATAGCG  
GAGGCTTGGTTTCGATCAAGCCGCTGAGTATTGGAAACAGGCTATAGCGCTTACTCCTGGTAATTATATTGAAGCGCAGAA  
TTGGTTAAAGATCACGCGGCGTTTC---GAA-----

-----ATGAGTTGGCGATCAGAATCT-----  
ATATGGATAGAATTTATAGTGGGATCTCGAAAAACAAGCAATTTTTGCTGGGCCTTTATCCTTTTTTTGGTTTCATTAGG  
GTTTTTATTAGTTGGAACCTTCTAGTTATCTTGGTAGGAATTTGATATCTTTATTTCCG---TCTCAG-----  
CAAATAGTTTTTTTTCCACAAGGAATCGTGATGTCTTTCTATGGGATCGCAGGCCTCTTTATTAGTTCCTATTTGTGGTG  
CACAATTTTTTGAATGTAGGCAGTGGTTATGATCGATTTCGATAGAAAGGAGGGAATAGTCTGTATTTTTCGTTGGGGTT  
TTCTGGAAAAAATCGTCGCATCTTTCTACGATTCTTATGAAAGATATTCAGTCCATCAGAATAGAAGTTAAA-----  
-----GAGGGTATTTATGCTCGTCGT-----GTCCTTTATATGGAAATCAGAGGC-----

CAGGGGGCCGTTCCCTTGACTCGTACTGATGAGAAT-----TTG---  
ACTCCGCGCGAAATTGAACAAAAGCTGCTGAATTGGCCTATTTTTTGCCTGTACCG---ATTGAA---GTCTTT-----

-----  
Helianthus -----  
-----

-----CTTGAT-----  
ATGGAGTTGGAACCTGCTAACTAGCATGAATGCGCTAACT-----ATGAATATGATGCCTGAAGAT-----  
-----  
GAAGACCAACTTTATATCACCTTCAATTCGAATTAGCAAAAGCAATGTCTCCTTGCATAATATGGATTCCAAACATTCA  
TGATCTGGATGTGAATGAGTCAAAT-----

TACTTCTCCCTAGGTCTATTAGTGAACCTTCTCTCC-----AGGGATTATGAA-----ACTAGAAAT---  
ATTCTTGTTATTGCTTCGACTCATATTTCCCAAAAAGTGGATCCCGCTCTAATAGCTCCGAATAAATTAATACGTGCAT  
TAAGATACGAAGGCTTCTTATTCCACAACAACGAAAGCACTTTTTCACTCTTTCATATACTAGGGGATTTTAC-----  
TTGAAAAGAAAATGTTCCATACT-----  
AATGGATTCCGGTCCATAACCATGGGTTCCAATGCACGAGATCTTGTAGCACTTACCAATGAGGCCCTATCGATTAGTAT  
TACACAGAAGAAATCAATTATAGATACTAATACAATTAGATCCGCTCTTCATAGACAAATTTGGGATTTGCGATCC-----

-----  
CAGGTAAGATCGGTCCAGGATCATGGGATCCTTTTTCTATCAGATAGGAAGGGCTGTAGCACAAAATGTACTTTTAAGTAA  
TTGCCCC-----ATAGATCCTATATCTATCTATATGAAAAAGAAATCA-----TGTAAC---  
GAAGTGGATTTTTATTTGTACAATTGGTACTTCGAACTT-----  
GGAACGAGCATGAAGAAATTAACGATACTTCTTTATCTTTTGAGTTGTTCTGCCGGATCGGTCCTCAAGATCTTTGGTC  
TCTACCCGGACCCGATGAAAAAATGGGATCACTCCTTATGGACTCGTTGAGAAT-----  
GATTCTGGTCTAGTTCGTGGC-----CTATTA-----GAAGTG-----  
GAAGGCGCT-----CTGGTGGGA-----TCCTCACGGACA-----

-----TGCAAGTATGATAAGGATCGAGTG-----  
ACATTGCTTCTTCGACCCGAACCAAGGAATCCCTTAGATATGATGCAAAAAGGATCTTGTTCTATCCTT---  
GATCAGAGATTTCTCTATGAAAAAGACGAATCGGAGTTTGAAGAG-----GGGGAA-----  
GGAGCCCTC-----GACCGG---CAACAGATAGAGGAGGAT-----TTATTC---  
AATCACATAGTTTGGGCTCCTAGAATATGGCGCCCT---TGGGGCTTTCTA-----  
TTTGATTGTATCGAAAGGCCCAATGAA-----TTGGGATTTCCCTATTGG-----

TCCAGGTCATTTTCGGGGCAAGCGGATCATTATGATAAA-----  
GAGGATGAGCTTCAAGAGAATGATTCGGAGTTCTTGCAGAGTGGAAACC---GCG---CAGTACCAGACACGAGATAGA--  
----TCTTCCAAAGAA-----CAAGGCCTT-----TTTCGAATAAGCCAATTCATTTGGGACCCT-----  
GCAGATCCA---CTCTTTTTTCTATTTC---AAAGCTCAGCCCTTTGTCTCT-----GTGTTTTCA-----CAT---  
CGAGAATTATTT-----GCAGATGAAGAGATGTCAAAG--  
-GGGCTTCTT-----ACTCCCCAAACA-----AATCCTCTACATCTCTATATAAACGCTGGTTTTATC-----  
AAGAAGACGCAAGAAAAG-----CACTTCGAATTGTTGATTAATCGCCAGAGATGGCTT-----AGAACC-----  
AATCGTTCATTATCTAAT-----GGATCTTTCCGTTCTAATACT-----  
CTATCCGAGAGTTATCAGTATTTATCAAATCTGTTCTATCT---  
AACGGAACACTATTGGATCAAATGACAAAGGCATTGTTGAGAAAAAGATGGCTTTTCCCGGATGAAATGCAAATTTGGATT  
CATGGAACAGGAGAAGGATTTCCCATTCCTTAGCCGGAAGATATGTGGCCATGA-----ATGTCTAGATCG--  
--

CGGATAAATGGAAATTTTATTGATAAAACCTTTTCAATTGTAGCCAATATCTTATTACGAATAATTCCGACAACCTTCAGG  
AGAAAAAGAGGCATTTACCTATTACAGAGATGGG-----ATGTCAGCTCAATCCGAAGGAAATTATGCG---  
GAAGCTTTACAGAATTATTATGAAGCTATGCGACTAGAAATTGATCCCTATGACCGAAGTTATATACTCTATAACATAGG  
ACTTATCCACACAAGTAACGGAGAACACACGAAAGCTTTGGAATATTATTTTCGAGCGCTCGAACGAAACCCATTCTTAC  
CACAAGCTTTTTAATAATATGGCCGTGATCTGTCATTACCGGGGAGAACAGGCCATTCCGCGGGGGATTCTGAAATTGCA  
GAGGCTTGGTTCGACCAAGCCGCTGAGTATTGGAACAGGCTATAGCACTTACTCCTGGTAATTATATTGAAGCTCATAA  
TTGTTGAAGATCACTAGACGTTTC---GAATAG-----

-----ATGAGTTGTCGATCAGAACAT-----

ATATGGATAGAACCTATAAAGGGGGCTCGAAAAACAAGTAATTTCTGCTGGGCTATTATCCTTTTTTTAGGTTTCATTAGG  
ATTCTTGGTTGGTTGGAACCTCGAGTTATCTTGGTAGAAATTTGATATCTTTATTTCCG---TCTCAG-----  
GAAATCGTTTTTTTTCCACAAGGAATTGTGATGTCTTTCTATGGGATCGCGGGTCTTTTTATTAGCTCCTATTTGTGGTG  
CACAATTTCTGTGGAATGTAGGTAGTGGTTATGATCGATTTGATATAAAAGACGGAATAGTGTGTATCTTTCTGTGGGGAT  
TTCTTGGAAAAAATCGTCCGGTCTTTCTCCGATTTCTTATAAAAGATATTTCAATCCGTCAGAATAGAAGTTAAA-----  
-----GAGGGTATTTATGCTCGGCCT-----GTCCTTTATATGGATATCAGAGGC-----  
CAGGGAGCCATTCATTGACTCGTACTGATGAGAAT-----TTT---  
ACTCCGCGGGAAATGGAACAAAAAGCTGCTGAATTGGCCTATTTCTTGCCTGTACCA---ATTGAA---GTATTTTAA--  
-----

Illicium



-----  
-----  
-----  
-----  
-----  
-----  
GAAAAAGATTGCAGTCAGTTTGATAATGATCGAGTG-----  
CCATTCCCTTTTCGGCCCGAGCCGAGGAAGCTCTTAGCTATT-----  
CAGAGATTTCTCTCTGAAAAAGAAGAATGGGAGTTGGCAGAA-----  
GGGAAGGAAGAAGGACTCCTT-----CAACCGCCGCAAGAGATAGAGGGG-----  
CACATAGTTTCGGCTCCTAAAATATGGCGCCCT---TGGTTCTGTCTA-----  
CTTGATGGCCTGGATAGGCCGTTGAATTTTTGGAATTGGGATATCCCTATTGCTATGGG-----  
-----  
-----  
-----

-----  
TACAGGTCATTTGAGGGCAAGCAGATCCTTTTTGATAAA-----  
GAGGATGAGCTTGAAGAGAATGATTCGGAGTTCTTGCAGAGT---TTC---ATC---CCG-----AGA---  
----TCTTCCGACGAA-----CACGGCTTT-----TTTAACTAAACCAATTCATTTGGGACCCT-----  
CCAGATCCG---CTCTTTTTGCTATCC---ACAGATGAGTTCCTGGCTCT-----GTGTTTTCA-----TAT---  
CGAGAATTATTT-----GCAGACGAAGAA-----  
----CTTCGT-----ATTACCAAAACA-----AAGCTTCGTACATTTAGGACT---CGCTGGCTTAGC-----  
AAGAAAGCACAAAAGGG-----CGCCTCGAATTGTTGATTAATCGTCAGAGATGGCTT-----AGACCC-----  
AATAGTGATGAAAGTGAG-----GACTCTCTCTATTCTCAAATT-----  
CTATCCGAGATTTTTGAGTATTTAAAAATCTCTTCCTATCT---  
AAGAGAGGGCTATTGGATCAAACGAGAAAGGTATTGTTTCAGAAAAAGATGGGTTTTCCCGGATGAAATGCACATTTTCTT  
CATGTAA-----ATGCCTAGATCG-----  
--

CGGATAAATGGAAATTTTATTGATAAGACCTTTTCAATTGTAGCCAATATCTTATTACGAATAATTCCGACAACCTTCAGG  
AGAAAAAGAGGCCATTTACCTATTACAGAGATGGA-----ATATCAGCTCAATCCGAAGGAAATTATGCG---  
GAAGCTTTACAGAATTATTATGAAGCTATGCGACTAGAAAATTGATCCCTATGATCGAAGTTATATACTCTATAATATAGG  
TCTTATCCATACAAGTAATGGAGAACATACGAAAGCTTTGGAATATTATTTTCGAGCACTAGAACGAAACTCATTCTTAC  
CCCAAGCTTTTAATAATATGGCCGTGATCTGTTCATTACCGGGGAGAGCAGGCCATTCCGCGAGGAGATTCCGAAATTGCG  
GAGGCTTGGTTTGATCAAGCAGCTGAGTATTGGAACAGGCTATAGCGCTTACTCCTGGTAATTATATTGAAGCACATAA  
TTGGTTAAAGATCACGAGGCGTTTC---GAATAA-----  
-----ATGAGTTGGCGATCAGAAGAT-----  
ATATGGATAGAACTTCTAACGGGGTCTAGAAAATAAGTAATTTCTGCTGGGCCCTTATCCTTTTTTTAGGTTTCATTAGG  
ATTCTTATTGGTTGGAACCTCCAGTTATCTTGGTAGAAATTGGATATCGTTTGTCCG---TCTCAG-----  
CAATTCATTTTTTTTTCCACAAGGGATTGTGATGTCTTTCTACGGGATCGCGGGTCTCTTTATTAGTTCTATTTGTGGTG  
CACAATTTCTGGAATATAGGTAGTGGTTATGATCGATTTCGATCGAAAGGAAGGGATAGTGTGTATTTTTCGTTGGGGAT  
TTCTTGAAAAAATCGTTCGATATTCCTCCGATTCTTATAAAAGATATTCAGTCCGTTAGAATAGAAGTGAAA-----  
-----GAGGGTTTATATGCTCGTCAT-----GTCCTTTATATGGATATCAGAGGC-----  
CAAGGGGCCATTCCCTTGACCCGTAATGATGAGAAT-----TTG---  
ACTCCACGAGAAATTGAACAAAAGCCGCCGAATTGGCCTATTTCTTGCGCGTACCA---ATTGAA---GTCTTTTGA--  
-----

Lactuca -----  
-----  
-----

-----CTTGAT-----  
ATGGAGCTGGAAGCTGCTAACTAGCATGAATGCGCTAACT-----ATGGATATGATGCCTGAAGAT-----  
-----  
GAAGACCTACTTTATATCACCTTCAATTCGAATTAGCAAAGCAATGTCTCCTTGACATAATATGGATTCCAAACATTCA  
TGATCTGGATGTGAATGAGTCAAT-----  
TACTTGTCCCGAGTCTATTAGTGAACCTTCTCTCC-----AGGGATTATGAA-----ACTAGAAAT---  
ATTCTTGTATTGCTTCGACTCATATTCCTCAAAAAGTGGATCCCGCTCTAATAGCTCCGAATAAATTAATACGTGCAT  
TAAGATACGAAGGCTTCTTATTCCACAACAACGAAAGCACTTTTTCACTCTTTCATATACTAGGGGATTTCCAC-----  
TTGAAAAGAAAATGTTCCATACT-----

AATGGATTTCGGGTCCATAACCATGGGTTCCAATGCACGAGATCTTGTAGCACTTACCAATGAGGCCCTATCGATTAGTAT  
TACACAGAATAAATCAATTATAGATACTAATACAATTAGATCCGCTCTTCATAGACAAATTTGGGATTTGCGATCC----

-----  
CAGGTAAGATCGGTCCAGGATCATGGGATCCTTTTTCTATAAGATAGGAAGGGCTGTAGCACAAAATGTACTTTTAAGTAA  
TTGCCCC-----ATAGATCCTATATCTATCTATATGAAAAAGAAATCA-----TGTAAC---  
GAAGTGGATTATTATTTGTACAATTGGTACTTCGAACTT-----  
GGAACGAGCATGAAGAAATTAACGATACTTCTTTATCTTTTGAGTTGTTCTGCCGGATCGGTCACTCAAGATCTTTGGTC  
TCTACCCGGACCCGATGAAAAAATGGGATCACTCCTTATGGACTCGTTGAGAAT-----  
GATTCTGGTCTAGTTCGTGGC-----CTATTA-----GAAGTG-----  
GAAGGCGCT-----CTGGTGGGA-----TCCTCACGGACA-----  
-----  
-----  
-----  
-----

-----TGCAGTCAGTTTGATAAGGATCGAGTG-----  
ACATTGCTTCTTCGACCCGAACCAAGGAATCCCTTAGATATGATGCAAAATGGATCTTGTCTATCCTT---  
GATCAGAGATTTCTCTATGAAAAAGACGAATCGGAGTTTGAAGAG-----GGGGAC-----  
-----GAGCGG---CAACAGATAGAGGAGGAT-----TTATTC---  
AATCACATAGTTTGGGCTCCTAGAATATGGCGCCCT---TGGGGCTTTCTA-----  
TTTGATTGTATCGAAAGGCCCAATGAA-----TTGGGATTTCCCTATTGG-----  
-----  
-----  
-----  
-----

-----  
TCCAGGTCATTTTCGGGGCAAGCGGATCGTTTTATGATGAA-----  
GAGGATGAGCTTCAAGAGAATGATTCGGAGTTCTTGCAGAATGGAACC---GTG---CAGTACCAGACACGAGATATA--  
----TCTTCCAAAGAA-----CAAGGCCTT-----TTTCGAATAAGCCAATTCATTTGGGACCCT-----  
GCAGATCCA---CTCTTTTTCTATTTC---AAAGCTCAGCCCTTTGTCTCT-----GTGTTTTCA-----CAT---  
CGAGAATTATTT-----GCAGATGAAGAGATGTCAAAG--  
-GGGCTTCTT-----ACTCCCCAAAAA-----AATCGTCTACATCTCTATATAAACGCTGGTTTTATC-----  
AAGAAGACGCAAGAAAAG-----CACTTCGAATTGTTGATTAATCGCCAGAGATGGCTT-----AGAACC-----  
AATCGTTCATTATCTAAT-----GGATCTTTCGTTCTAATACT-----  
CTATCCGAGAGTTATCAGTATTTATCAAATCTGTTCTATCT---  
AACGGAACACTATTGGATCAAATGACAAAGGCATTGTTGAGAAAAAGATGGCTTTTCCCGGATGAAATGCAAATTGGATT  
CATGGAACAGGATAAGGATTTCCCATTCCTTAGCCAGAAAGATATGTGGCCATGA-----ATGCCTAGATCG--  
--

CGGATAAATGGAAATTTTATTGATAAAACCTTTTCAATTGTAGCCAATATCTTATTACGAATAATTCCGACAACCTTCAGG  
AGAAAAAGAGGCATTTACCTATTACAGAGATGGG-----ATGTCAGCTCAATCCGAAGGAAATTATGCG---  
GAAGCTTTACAGAATTATTATGAAGCTATGCGACTAGAAATTGATCCCTATGACCGAAGTTATATACTCTATAACATAGG  
ACTTATCCACACAAGTAACGGAGAACATACGAAAGCTTTGGAATATTATTTTCGAGCGCTCGAACGAAACCCATTCTTAC  
CACAAGCTTTTAATAATATGGCCGTGATCTGTCATTACCGGGGAGAACAGGCCATTTCGGCAGGGGGATTCTGAAATTGCG  
GAGGCTTGGTTCGACCAAGCCGCTGAGTATTGGAACAGGCTATAGCACTTACTCCTGGTAATTATATTGAAGCGCATAA  
TTGGTTGAAGATCACTAGACGTTTC---GAATAA-----  
-----ATGAGTTGTCGATCAGAACAT-----

ATATGGATAGAACCTATAACGGGGGCTCGAAAAACAAGTAATTTCTGCTGGGCTGTTATCCTTTTTTTAGGTTTATTAGG  
ATTCTTGTGGTGGAACTTCGAGTTATCTTGGTAGAAATTTGATATCTTTATTTCCG---TCTCAG-----  
GAAATAGTTTTTTTTCCACAAGGAATTGTGATGTCTTTCTACGGAATCGCGGTCTTTTTATTAGCTCCTATTTATGGTG  
CACAATTTTCGTGGAATGTAGGTAGTGGTTATGATCGATTTGATAGAAAAGACGGAATAGTGTGTATCTTTTCGTTGGGGAT  
TTCTGGAATAAATCGTTCGGGCTTCTCCAATTTCTTATAAAAGATATTCAGTCTGTCAGAATAGAAGTGAAA-----  
-----GAAGGTATTTATGCTCGTCGT-----GTCCTTTATATGGATATCAGAGGC-----  
CAGGGAGCCATTCCATTGACTCGTACTGATGAGAAT-----TTT---  
ACTCCACGGGAAATGGAACAAAAGCTGCTGAATTGGCCTATTTCTTGCCTGTACCA---ATTGAA---GTATTTTAA--  
-----  
-----  
-----

Liriodendron -----  
-----  
-----





CAAATCCTTTTTTTTCCCAAGGAATCGTGATGTCTTTCTATGGGATCGCTGGTCTGTTTCATTAGTTCCTATTTGTGGTG  
CACAATTTTCATGGAATGTAGGTAGTGGTTATGATCTTTTCGATAGAAAAGAAGGAATAGTGTGTATTTTTTCGTTGGGGAT  
TTCCTGGAATAAATCGTCGCATCTTCCTTCGATTTCCTTATGAGAGATATCCAGTCGATCAGAATGGAAGTTAAA-----  
-----GAGGGTCTTTATCCTCGTCTG-----GTCCTTTATATGGAATCAGAGGC-----  
CAGGGAGCCATTCCCTTGACTCGTACCGATGAGAAT-----TTT----  
ACTCCACGAGAAATTGAACAAAAGCTGCTGAATCGGCCTATTTCTTGCGCGTACCA---ATTGAA---GTATTT-----  
-----

Lotus -----

-----GACCGTGACCTTGAT-----  
ACGGAGCTGGAGTTGCTAACTATGATGAATGCGCTAACT-----ATGGATATGATGCCGGAA-----

ATAGACCGATTTTATATCACCCCTTCAATTCGAATTAGCAAAAAGCAATGTCTCCTTGCCATAATATGGATTCCAAACATTCA  
TGATCTGGATGTGAATGAGTCGAAT-----  
TCCTTATCCCTCGGTCTATTAGCGAACCATCTCTCC-----AGGGATTGTGAAAGATGT---TCCACTAGAAAT---  
ATTCTTGTTATTGCTTCGACTCATATTCCCCAAAAGTAGATCCCGCTCTAATAGCTCCGAATAAATTAATACATGCAT  
TAAGATACGAAGGCTTCTTATTCCACAACAACGAAAGCACTTTTTTACTCTTTTCATATACTAGGAGATTTTCAC-----  
TTCGAAAAGAAGATGTTCCATACT-----  
AATGGATTCCGGTCCATAACTCTGGGTTCCAATGTACAAGATCTTGTAGCACTTACCAATGAGGCCCTATCAATTAGTAT  
TATACAAAAGAAATCCATTATAGACACTAATCTAATTAGATCTGCTCTTCATAAACAACCTTGGGATTTGCGATCT-----  
-----

CAGGTAAGATCGGTTCCAGGATCATGGGATCCTTTTCTATCAGATAGGAAGGGCTGTTTCACAAAATGTACTTCTAAGTAA  
TTGCTCC-----ATAGATCCTATATCTATCTATATGAAGAAGAAATCA-----TGTAAT---  
GAGGGGGATTCTTATTTGTACAAATGGTATTTTCAACT-----  
GGAACGAGCATGAAGAATTTAACGATACTTCTTTATCTTTTGTAGTTGTTCTGCCGGAGCGGTCGCTCAAGACCTTTGGTC  
TCTACCCGGACCTGATGAAAAAATGGGATCACTTCTTATGGACTCGTTGAGAAT-----  
GATTCTGATCTAGTTCATGGC-----CTATTA-----GAAGTA-----  
GAAGGCGCT-----CTGGTGGGA-----TCTTCACGGACA-----

-----GAAAAAGATTGCAGTCAGTTTGATAATGATCGGGTG-----  
ACATTACTTCTTCGGCCCGAACCAAGTAATCCCTTAAATATGATTCAAAAATGGATCTTGTTCTATCGTT---  
GATCAGAGATTTCTCTATGAAAAATATGAATCGGAGTTTGAAGAA-----GGGGAA-----  
GGAGTCTCTC-----GACCTG---CAACAGATAGAGGAGGAT-----TTATTC---  
AATCACATAGTTTGGGCTCCTAGAATATGGTGCCCA---TGGGGCTTTCTA-----  
TTTGATTGTATCGAAAGGCCCAATGAA-----TTGGGATTTCCCTATTGG-----

GCCAGGTCATTTTCGGGGCAAGCGAATCATTTTATGATGAA-----  
GAGGATGAGCTTCAAGAGAATGATTCGGAGTTCTTGCAGGGTGGAACC---ATG---CAGTACCAGACACAAGATAGA--  
----TCTTCCAAAGAA-----CAAGGCTTT-----TTTCGAATAAGCCAATTCATTTGGGACCCC-----  
ACGGATCCA---CTCTTTTTCTATTTC---AAAGATCAGCCTTTTGTCTCT-----GTGTTTTCA-----CAT---  
CGAGAATTCCTT-----GACTTTCTT-----ACTTTCCAAACA-----GATCTTCCGACATCTATATATAAACGCTGGTTTATC-----  
AAGAATACGCAAGAAAAG-----CATTTTGAATTTGTTGATTCATCGCCAGAGATGGCTT-----AGAACC-----  
AATAATTCATTATCTAAT-----GGATTTTTCCGTTCTAATACT-----  
CTATCCGAGAGTTATCAATATTTATCAAAATATGTTCTATCT---  
AACGGAACACTATTGGATCAAATGACAAAAGACATTGTTGAGAAAAGATGGCTTTTCCGGATGAGATGGTTGTTGCTAT  
CTGCTCCAATAACGAATCATTGGTTTAA-----ATGCCTAGATCT-  
--

CGGATAAATGGAATTTTTATTGATAAGACCTTTTTCAGTTGTAGCCAATATCTTATTACAAATAATACCCACAACCTCGGG

AGAAAAAGAGGCATTCACTTATTATAGAGATGGG-----ATGTCAGCTCAATCTGAAGGAAATTATGCG---  
GAAGCTTTACAGAATTATTATGAGGCTATGCGACTGGAAGTTGATCCCTATGATCGAAGTTATATACTTTATAACATAGG  
CCTTATCCACACAAGTAACGGAGAACATACGAAAGCTCTGGAATATTATTTTCGGGCACTCGAACGAAATCCGTTCTTAC  
CTCAAGCTTTTAAACAATATGGCCGTGATCTGTCATTACCGGGGAGAACAGGCCATTAGACAGGGGAGATTCTGAAATTGCC  
GAATCTTGGTTTCGATCAAGCTGCTGAATATTGGAACAAGCTATAGCCCTTACCCCGGTAATTATATTGAAGCACAGAA  
TTGGTTAAAAATTACAAGGCGTTTT---GAATAA-----  
-----ATGACTTGGATATCAGAAGATACG---  
TGGCAGTCAGAAGAAGTACGAGTAGATTTTGTAAACGGGGTGTGCAACCCCGTGATTTCTTCTGGGCATTTATCACTCT  
TTTAGGTTTACAGTAGGGTTTTTATTGGTTGCAGCTTCCAGTTATCTTCATAAGAATTTTTTATCTTTTCATTTG---  
TCTGAGTTTGATTCCGAGCTAATTCGTTTTTGGCCACAAGGGGCTACGATAACTGTTTTATGGGACCGCGGGTCTATTGT  
TAGTTTGTTTTTGTGGCTTACCATTTTTTGGAAATGTGGGCAGTGGTTATGATCTTTTCGATAAAAAAAGGAATAGTGT  
GCATTTTTCGTTACGGATTTCTGGAAAAAATCGTCGATTTTTTATCCGAGTCCTTATCAACGATATTCAGTCCCTCATA  
ATACAAAGTAAAAAGGAAAAATAAAAAAGAGGGTAGGTATCTTCGCGAGTGGT---GTCCTTTATATGCAAACCAGAGAA--  
----CAGGGGGCCATTCCCCTAACTGCTGTTGACGATTCT-----TGG---  
AATCCACCAAAAATTGCACAAAAGCTGGAGATTTGTCCAAGTTATTGCGTGTGCCA---ATTGAA---ATATTT-----  
-----

Morus

-----GACCGCGACCTTGAT-----  
ACGGAGCTGGAGCTTCTAACTATGATGAATGCGCTAACT-----ATGGATATGATGCCGGAA-----  
-----  
ATAGACCGGTTTTATATCACCCCTCAATTCGAATTAGCAAAGCAATGTCTCCTTGCATAATATGGATTCCAAACATTCA  
TGATCTGGATGTGAATGAGTCGAAT-----  
TACTTATCCCTCGGTCTATTAGTGAAGTATCTCTCC-----AGGGATTGTGAAAGATGT---TCCACTAGAAAT---  
ATTCTTGTTATTGCTTCGACTCATATTCGCCAAAAAGTGGATCCCGCTCTAATAGCTCCGAATAAATTAATACATGCAT  
TAAGATACGAAGGCTTCTTATCCACAACAACGAAAGCACTTTTTCACTCTTTCATATACTAGGGGATTTTAC-----  
TTGGAAAAGAAAATGTTCCATACT-----  
AATGGATTCGGGTCCATAACCATGGGTTCCAATGTACGAGATCTTGTAGCACTTACCAATGAGGCCCTATCGATTAGTAT  
TACACAGAAGAAATCAATTATAGACACTAATATAATTAGATCCGCTTTTCATAGACAAACTTGGGATTTGCGATCC----  
-----  
CAGGTAAGATCCGTTACAGGATCATGGGATCCTTTTTCTATCAGATAGGAAGGGCTGTTGCACAAAATGTACTTCTAAGTAA  
TTGCTCC-----ATAGATCCTATATCTATCTATATGAAGAAGAAATCA-----TGTAAC---  
GAAGGGGATTCTTATTTGTACAAATGGTACTTTCGAACTT-----  
GGAACGAGCATGAAGAAATTAACGATACTTCTTTATCTTTTGGATTGTTCTGCCGGATCGGTTCGCTCAAGACCTTTGGTC  
TCTACCCGAACTCGATGAAAAAATGGGATCACTTCTTATGGACTCGTTGAGAAT-----  
GATTCTGATCTAGTTCATGGC-----CTATTA-----GAAGTA-----  
GAAGGCACT-----CTGGTGGGA-----TCCTCGCGGACA-----  
-----  
-----GAAAAAGATTGCAGCCAGTTTGATAATGATCGAGCG-----  
ACATTGCTTCTTCGGCCCGAACCAAGGAATCCCTTAGATATGATGCAAAATGGATCTTGTCTATCGTT---  
GATCAGAGATTTCTCTATGAACAATACAAATCGGAGTTTGAAGAA-----  
GGGGAAGGAGAAGGAGTCCCTC-----GACCCG---CAACGGATAGAGGAGGAT-----TTATTC---  
AATCACATAGTTTGGGCTCCTAGAATATGGCGCCCT---TGGGGCTTTCTA-----  
TTTGATTGTATCGAAAGCCCCAATGAA-----TTGGGATTTCCCTATTGG-----  
-----  
-----

GCCAGGTCATTTTCGGGGCAAGCGGATCATTTTATGATGAA-----  
GAGGATGGACTTCAAGAGAATGATTCGGAGTTCTTGCAGAGTGAAC---ATG---CAGTACCAGACACGAGATAGA--  
----TCTTCCAAAGAA-----CAAGGCTTT-----TTTCAATAAGCCAATTCATTTGGGACCCT-----  
GCAGATCCA---CTCTTTTTTCTATTCT---AAAGATCAGCCCTTTGTCTCT-----GTGTTTTCA-----CAT---

CGAGAATTCTTT-----GCAGATGAAGAGATGTCAAAG--  
-GGGCTTCTT-----ACTTCCCAAACA-----GATCTTCCTACATCTATATATAAACGCTGGTTTATC-----  
AAGAATACTCAAGAAAAG-----TACTTCGAATTGTTGATTTATCGCCAGAGATGGCTT-----AGAACC-----  
AATAGTTCATTATCTAAT-----GGATTTTTCCGTTCTAATACT-----  
CCATCTGAGAGTTATCAGTATTTATCAAAGCTGTTCTATCT---  
AACGGAACGCTATTGGATCAAATGACAAAGACATTGTTGAGAAAAAGATGGCTTTTCCCGGATGAAATGGTTCTTGCTAT  
CTGCTACAATAACGAATCATTGGTTTAA-----ATGTCTAGATCT--  
--

CGAATAAATGGAAATTTTATTGATAAGACCTTTTCAATTGTAGCCAATATCTTATTACGAATAATTCCGACAACCTTCGGG  
CGAGAAAGAGGCATTTCGCCTATTACAGAGATGGT-----ATGTCCGCTCAATCCGAAGGAAATTTATGCA---  
GAAGCTTTACAGAATTATTATGAAGCTATGCGACTAGAAATTGATCCCTATGATCGAAGTTATATACTCTATAACATAGG  
CCTTATCCACACAAGAAACGGAGAACATACGAAAGCTTTGGAATATTATTTTCGTGCACTAGAGCGAAACCCATTCTTAC  
CACAAAGCTTTTTAATAATATGGCCGTGATCTGTCATTACCGGGGAGAACAGGCCATTGACAAGGAGATTCTGAAATTGCG  
GAAGCTTGGTTCGATCAAGCTGCCGAATATTGGAAACAAGCTCTAGCGCTTACTCCTGGTAATTATATTGAAGCGCAGAA  
TTGGTTGAAGATCACAGGGCGTTTC---GAATAA-----  
-----ATGAGTTGGCGATCAGACCAT-----

ATATGTATAGAACTTATAGCGGGTCTCGAAAACCGAGTAATGTCTGCTGGGCTTTTATCCTTTTTTTAGGTTTCATTAGG  
GTTTTTATTGGTTGGAACCTTCTAGTTATCTTGGTAGGAATTTTATACCGTTCTTTCC---TCTCAG-----  
CAAATAATTTTTTTTCCACAAGGAATCGTGATGTCTTTCTATGGAATCGCGGGTCTTTTTATTAGTTCATATTTGTGGTG  
CACAATTTTCGTGGAATGTGGGTAGTGGTTATGATCGATTGATATAAAAGAAGGAATAGTGTGATTTTTTCGTTGGGGAT  
TTCTTGAAAAAATCGTCGCATCTTCTCCGATTCTTATGAAAGACATTCAATCCATCAGAATAGAAGTTAAA-----  
-----GAGGGTATTTATGCTCGTCGT-----GTCCTTTATATGGAATCAGAGGC-----  
CAGGGGTCCATTCCCTTGACTCGTACCGATGAGAAT-----TTG---  
ACTCTACGAGAAATTGAACAGAAAGCTGCTGAATTGGCCTATTTCTTGCGTGTACCA---ATTGAA---GTATTTTGA--  
-----

Nandina

-----GATGATGACCTTGATATTGATACG-----  
GAGCTGCTAACTATGATGAATGCGCTAACT-----ATGGATATGACGCCGAAA-----

ATAGACCGATTTTATATCACCCCTTCAACTCGAATTAGCAAAAGCAATGTCTCCTTGCATAATATGGATTCCAAACATTCA  
TGATCTGTCTGTGAATGAGTCGAAT-----  
TACTTATCCCTCGGTCTATTAGTGAACCATCTCTCC-----AGGGATTGTGAAAGATCC---TCCACTAGAAAT---  
ATTCTTGTTATTGCTTCGACTCATATTTCCCAAAAAGTGGATCCCCTCTAATAGCTCCGAATAAATCAAATACATGCAT  
TAAGATACGAAGGCTTCTTATTCCACAACAACGAAAGCACTTTTTCACTCTTTTATATACTAGGGGATTTTAC-----  
TTGAAAAGAAAATGTTCCATACT-----  
AATGGATTCCGGTCCATAACCATGGGTTCCAATGCACGAGATCTTGTAGCACTTACCAATGAGGCCCTATCAATTAGTAT  
TACACAGAAGAAATCCATTATAGACACTAATACAATTCGATCCGCTCTTATAGACAAACTTGGGATTTGCGATCC----  
-----

CAGGTAAGATCGGTTCAGGATCATGGGATCCTTTTCTATCAGATAGGAAGGGCTGTTGCACAAAATGTACTTCTAAGTAA  
TTGCCCC-----ATAGATCCTATATCTATCTATATGAAGAAGAAATCA-----TGTACG---  
GAAGGGGATTCTTATTTGTACAAATGGTACTTTCGAGCTT-----  
GGAACGAGCATGAAGAAATTAACGATACTTCTTTATCTTTTGTAGTTGTTCTGCCGGATCGGTCGCTCAAGATCTTTGGTC  
TCCACCCGGACCCGATGAAAAAATTTGGATCACTTCTTATGGATTTCGTTGAGAAT-----  
GATTCTGATCTAGTTCATGGC-----CTATTA-----GAAGTA-----  
GAAGACGCT-----CTGGTGGGA-----TCCTCACGGACA-----  
-----  
-----  
-----

-----GAAAAGATTGCAGTCAGTTTGATAATGATCGAGTG-----  
ACATTGCTTCTTCGGTCCGAACCAAGGAATCCCTTAGATATGATGCAAAATGGATCTTGTCTATCGTT---  
GATCAGAGATTTCTATATGAAAAATACGAATCGGAGTTTGAAGAA-----  
GGGGAAGGAGAAGGAGCCCTC-----GACCCG---CAACAGCTAGAGGAGGAT-----TTATTC---  
AATCACATAGTTTGGGCTCCTAGAATATGGCGCCCT---TGTGGCAATTTA-----  
TTTGATTGTATCGAAAGTCCCAATGAA-----TTGGGATTTCCCTATTGG-----



-----  
-----  
-----GAAAAAGATTGCAGTCAGTTTGATAATGATCGAGTG-----  
ACATTGCTTCTTCGGCCCGAACCGAGGAATCCCTTAGATATGATGCAAAACGGCTCTTGTTCCTATCCTT---  
GATCAGAGATTTCTCTATGAAAAATATGAATCGGAGTTTGAAGAA-----  
GGGGAGGGAGAAGGAGCCCTT-----GACCCG---CAG-----GAGGAT-----TTATTC---  
AATCACATAGTTTGGGCTCCTAGAATATGGCGCCCT---TGGGGCTTTCTA-----  
TTTGATTGTATCGAAAGGCCCAATGAA-----TTGGGATTTCCCTATTGG-----  
-----  
-----

TCCAGGTCATTTTCGGGGCAAGCGGATCATTTATGATGAA-----  
GAGGATGAGCTTCAAGAGAATGATTCGGAGTTCTTGCAGAGTGGAACC---ATG---CAGTACCAGACACGAGATAGA--  
----TCTTCCAAAGAA-----CAAGGCCTT-----TTTCAATAAGCCAATTCATTTGGGACCCT-----  
GCAGATCCA---CTCTTTTTTCTATTC---AAAGATCAGCCCCCTGGCTCT-----GTGTTTTCA-----CAT---  
CGAGAATTATTT-----GCAGATGAAGAGATGTCAAAG--  
-GGGCTTCTT-----ACTTCCCAAACA-----GACCCTCTACATCTATATATAAACGCTGGTTTTATC-----  
AAGAATACGCAAGAAAAG-----CACTTCGAATTGTTGATTAATCGTCAGAGATGGCTT-----AGAACC-----  
AACAGTTTATTATCTAAT-----GGATCTTTCCGTTCTAATACT-----  
CTATCCGAGAGTTATCAGTATTTATCAAATCTGTTCCCTATCT---  
AACGGAACGCTATTGGATCAAATGACAAAGACATTGTTGAGAAAAAGATGGCTTTTCCCGGATGAAATGAAAATTGGATT  
CATGTAA-----ATGCCTAGATCA--  
--

CGGATAAATGGAAATTTTATTGATAAGACCTTTTCAATTGTAGCCAATATCTTATTACGAGTAATTCGACAACTTCAGG  
AGAAAAAGAGGCATTTACCTATTACAGAGATGGT-----ATGTCGGCTCAATCCGAAGGAAATTACGCG---  
GAAGCTTTGCAGAATTTATTATGAAGCTATGCGACTAGAAATTGATCCCTATGATCGAAGTTATATACTCTATAATATAGG  
GCTTATCCACACAAGTAATGGAGAACATACGAAAGCTTTGGAATATTTTTCGAGCACTAGAACGAAACCATTCTTAC  
CACAAGCTTTTAAATAATATGGCCGTGATCTGTCTATTACCGGGGAGAACAGGCCATTCAACAGGGAGATTCTGAAATTGCA  
GAGGCTTGGTTTCGATCAAGCCGCTGAGTATTGGAACAGGCTATAGCGCTTACTCCCGGTAATTATATTGAAGCGCATAA  
TTGGTTGAAGATCACGAGACGTTTC---GAA-----  
-----

-----ATGACTTGGCGATCAGAACAT-----  
ATATGGATAGAACTTATAACGGGGTCTCGAAAAATAAGTAATTTCTGCTGGGCTTTATCCTTTTTTTTAGGTTTCATTAGG  
CTTCTTATTAGTTGGAACCTTCCAGTTATCTTGGTAGAAATTTGATATCTTTTTTTCCG---CCTCAG-----  
CAAATCATTTTTTTTTCCACAAGGACTCGTGATGTCTTTCTACGGAATTGCGGGTCTCTTTATTAGCTCTTATTTGTGGTG  
CACAATTTCTGGAATGTAGGTAGTGGTTATGATCGATTCGATAGAAAGGAAGGAATAGTCTGTATTTTTCTGTTGGGGAT  
TTCCGGGAAAAAATCGTCGCATATTTCTCCGATTCTTATAAAAGATATTCAGTCCGTTAGAATAGAAGTTAAA-----  
-----GAGGGTATTTCTGCTCGTCGT-----GTTCTTTATATGGACATCCGAGGC-----  
CAGGGGTCCATTCCCTTGACTCGTACTGATGAGAAT-----TTG---  
ACTCCACGAGAAATTGAACAAAAGGCTGCTGAATTAGCCTATTTCTTGCCTGTACCA---ATTGAA---GTATTT-----  
-----

Nuphar

-----GATGATGACCTTGAT-----ACG-----  
GAGCTGCTAACTATGCCGAATGTGCTAACT-----ATGTATATGACGCCGAAA-----  
-----

ATAGACCGATTTGAGATCACCTTCCATTAGAATTAGCAAAAGCAATGTCTCCTTGCATAATATGGATTCCAAACATTCA  
TGATCTGTATGTGAATGAGTCGAAT-----  
TACTTATCCCTCGGTCTATTAGTGAACCATCTCCCC-----AGGGATTGTGAAAGATGT---TCCACTAGAAAT---  
ATTCTTGTTATTGCTTCGACTCATATTTCCCCAAAAGTGGATCCCGCTCTAATAGCTCCGAATAAATCAAATACATGCAT  
TAAGATACGAAGGCTTCTTATTCCACAACAACGAAAGCACTTTTTCTATTCTTTTCAATACTAGGGGATTCCGC-----  
TTGAAAAGAAAATGTCCCATACT-----  
AATGGATTCCGGTCCATAACCATGGGTTCCAATGCACGAGATCTTGTAGCACTTACCAATGAGGTCCTATCAATTAGTAT  
TACACAAAAGAAAATCAATTATAGACACTAATACAATTAGATCAGCTCTTCATAGACAACTTGGGATTTGCGATCC-----  
-----

CAGGTAAGATCCGTTTCAGGATCATGAGATCCTTTTCTATCAGATAGGAAGGGCTGTTGCACAAAATGTACTTCTAAGTAA  
TTGCTCC-----ATAGATCCTATATCTATCTATATGAAGAAGAAATCA-----TGTAAG---  
GAAGGGGATTCTTATTTGTCCAAATGGTACTTCGAACTT-----  
GGAACGAGCATGAAGAAATTAACGATACTTCTTTATCTTTTGTAGTTGTTCTGCCGGATCGGTGCTCAAGATCTTTGGTC  
TCCACCCGGACCCGATGAAAAAATTTGGATCACTTCTTATGGATTCGTTGAGAAT-----  
GATTCTGATCTAGTTCATGGC-----CTATTA-----  
GAAAGCGCT-----CTGGTGGGA-----TACTCACGGACA-----

-----GAA-----TGCAGTCAGTTTGATAATGATCGAGTG-----  
ACATTGCTTCTTTCGGTCCGAACCAAGGAATCAGTTAGATATGATGCAAAAATGGATCTTGTTCCTATCGTT---  
GATCAGAGATTTCTATATGAAAAATACGAATCGGGGTTTGAAGAA-----  
GGGGAAGGAGAAGGAACCTC-----GACCTG---CAACAGATAGAGGAGGATGAGGATTTATTC---  
AATCACATAGTTTGGGCTCCTAGACTATGGCGCCCT---CATGGCAATCTA-----  
TTTGATTGTATCGAAAGGCCCAATAA-----TTGGGATTTCCCTATTGG-----

GTCAGGTCATTTCCGGGGCAAGAAGATCATTTATCATAAA-----  
GAGGATAAGCTTCAAGAGAATGATTCGGAGTTCTTGCAGAGTGGAAACC---GTG---CAGTACCAGACACGAGATAGA--  
----TCTTCCAAAGAA-----CAAGGGTTT-----TTTCGAATAAGCCAATTCATTTGGGACCCT-----  
GCAGATCAA---TTCTTTTTTCTATTTC---AAAGATCAGCCCTTTGTCTCT-----GTGTTTTCA-----CGT---  
CGAGAATTTTTT-----GCAGATGAAGAGATGTCAAAG--  
-GGACTTATT-----ACTTCCCAAACA-----AATCCTCTACATCTATATATAAACGCTGGTTGATC-----  
AAGAATACGCAAGAAAAG-----CACTTCGAATTGTTGATTCATCGCCAGAGATGGCTT-----  
AGAACTAATACTAATAGTTTCATTATCTAAT-----GGATCTTTCCGTTCTAATACT-----  
CTATCCGAGAGTTATCAGTATTTATCAAATCTGTTTCTATCTAATAACGGAACGCTATTGGATCAAATGACAAAGACATT  
GTTGAGAAAGAGATGGCTTTTCCCGGATGAAATGAAACATTTGATTCATGCACCAGGAGAAAGATTTCCCATTCCTTAG-

-----ATGTCAGCTCAATCTGAAGGAAATTATGCG---  
GAAGCTTTACAGAATTATTATGAAGCTATGCGACCAGAAATTTGATCCCTACGATCGAAGTTATATACTCTATAATATAGG  
CCTTATACACACAAGCAACGGAGAACATACGAAGGCTTTGGAATATTATTTCCGAGCACTAGAACGAAATCCATTCTTAC  
CACAAGCTTCTAATAATATGGCCGTGATCTGCCATTACCGGGGAGAAGAGGCCATTTCGACAGGGAGATTCTGAAATTGCG  
GAGGCTTGGTTCGATCAAGCTGCTGAGTATTGGAACAAGCCATAGCGCTTACTCCAGGTAATTATATTGAAGCACAGAA  
TTGTTGAAGATTACAGGGCGGTTTC---GAA-----

-----ATGAATTGGCGATCAGAACAT-----  
ATATGGATAGAACTTATAACGGGTTCTAGAAAAATAAGTAACTTCTGCTGGGCCTGTATCCTTTTTTTAGGTTCACTAGG  
ATTTTTATTGGTTGGAECTTCCAGTTATTTTGGTAGGAATCTGATATCCTTATTCCCA---TCTCAG-----  
CAAATCATTTTTTTTCCACAAGGGATCGTGATGTGTTTCTATGGTATCGCGGGTCTATTCATTAGCTCCTATTTGTGGTG  
CACAATTTTATGGAGTGTAGGTAGTGGTTATGACAAATTCGATAGAAAAGAAGGAATAGTTTGTATTTTTCGTTGGGGAT  
TTCTTGAAGAAAATCGTCGCATCTTCTTTCGATTCCGTATAAGAGATATCCGTTTCGATCAGAATGGAAGTTAAA-----  
-----GAGGGTCTTTTTTCTCGCCGT-----GTCCTTTATATGGAATCGGAGGC-----  
CGGGGAGACATTCATTGACACGTACCAATGAGAAT-----TTA---  
ACTCCACGAGAAATGAACAAAAGCTGCCGAATCGGCCTATTTTTTGC GCGTACCA---ATTGAA---GTATTT-----

Nymphaea

-----GATGATGACCTTGAT-----ACG-----  
GAGCTGCTAACTATGCCGAATGTGCTAACT-----ATGTATATGACGCCGAAA-----

ATAGACCAATTTGAGATCACCTTCCATTAGAATTAGCAAAGCAATGTCTCCTTGCCATAATATGGATTCCAAACATTCA





ACTCCACGAGAAATTGAACAAAAAGCTGCCGAATCGGCCTATTTTTTTCGCGGTACCA---ATTGAA---GTATTT-----  
-----

Oenothera

CGATTATGATGAGCCTGGTGCCAGTGACGATTATGAGGATCGTGATATGGAAGATTTTGTGGATAGCGAGATGACG----  
-----  
-----

GAGTGGCTAACTAAGACGAATGTGCCACTT-----GTGTATCAGTTGCTGGACGATGAA-----  
-----

ATAGACGAATTTTATATCACCCCTTCAATTGCAATTAGCAAAAGCAATGTCTCCTTGCATACTATGGATTCCAAACATTCA  
TGATCTGGATGCGAAAGAGTCGGAT-----

TACTTATCCCTCGGTCTATTAGTGAACCATCTCTCC-----AGGGATTGTGGAAGACGT---

TCCACTAAAAATGAGATTCTTGTATTGCTTCGACTCATATTTCCCAAAAAGTGGATCCCTCTCTAATAGGTCCGGATGG  
ATTAAGTACATGCATTAAGACACGAAGGCTTCTTGTTCACAACAACAACAGTGCCTTTTACCCTTTCATATACTAGGG  
GATTTTAC-----

TTGGAAAATAAAATGTTCCATACTCATACTAATGAATTGAGTCCACAATCTTGGGTCCCAGTGTACCAGATCTTGTAGC  
ACTTACCAACGAGGCCCTATCGATTAGTATTACACAGAAGAAATCAATTATAGACACTACTACAATTAGATATGCTCTTC  
ATAGAAAAACTTGGGATTTGGAAGCCGACAGA---

AACCTAAGCCCAGGCTAAGGAGCATGGGACCCTTTTCTATCAGGTAGGAAGGGCTTTTGCACACACTGTACTTCTAAGGAA  
TTGCCCC-----ATAGATCCTATATCTATCTATATCAAGAAGAACTTA-----TGTGAA---

GCAGGGGATTCTTCTTTGTACAAATGGTACTTTCGAACTT-----

GGAACGAGCATGAAGAAATTAACGATACTTCTTTATCTTTTACTTGTCTGCCGGATCGATCGCTCAAGACCTTTTGTCT  
TCCCCCGGACCCGATGAACAAAATTTGATCACTTCTTATGGACTCGTTGAGAAC-----

GATTCTGATCTAGTTCATGGCCTATCTGATATAGTTCATGGCCTATTA-----GAGTTA-----

GAAGGCGCT-----CTGGTGGGA-----

TCCTCGCCGACAGAAGAGGAAGTAGAAGGGACAGAAGAGGAAGTAGAAGGGACAGAAGAGGAAGTAGAAGGGACAGAAGA  
GGAAGTAGAAGGGACAGAAGAGGAAGTAGAAGGGACAGAAGAGGAAGTAGAAGGGACAGAAGAGGAAGTAGAAGGGACAG  
AAGATGAGGAAGGAGAAGGGACAGAAGAGGAAGTAGAAGGGACAGAAGATGAGGAAGGAGAAGGGACAGAAGAGGAAGTA  
GAAGGGACAGAAGATGAGGAAGGAGAAGGGACAGAAGAGGAAGTAGAAGGGACAGAAGATGAGGAAGGAGAAGGGACAGA  
AGATGAGGAAGGAGAAGGGACAGAAGAGGAAGTAGAAGGGACAGAAGAGGAAGTAGAAGGGACAGAAGATGAGGAAGGAG  
AAGGGACAGAAAAAGATTCCAGTCAGTTTGATAATGATCGAGTG-----

ACATTGCTTCTTCGGCCCAAACCAAGGAATCCCTTAGAT---ATTCAGAGA-----CTTATCTATCAA--

-----CATCAAAAATACGAATCGGAGTTGGAAGAAGACGACGACGACGACGAGGAC-----GTCTTC-

-----GCCCG---CAAAGATGTTGGAGGAT-----TTATTC---

AGTGAAGTAGTTTGGTCTCCTAGAAATATGGCACCT---TGGGACTTTATA-----TTGGATTGT-----  
-----

GAGGCTGAGATTCCAGCGGAAGAGATTCCAGAGGAAGAGGATCCGCTTCCAGAAGAGGCTCTAGAGACTGAGGTTGCAGT  
GTGGGGAGAGGAAGAAGAGGGAGAAGCGGATGACGAAGAGGATGAGCGGCTTGAAGCTCAACAAGAGGATGAGCTGCTTG  
AAGAGGAAGACGAAGAGCTAAAAGAGGAAGAGGATGAGCTTACGAGGAAGAGGAAGAGGAAGAGGAAGAGGAAGAGGAA  
GAGGAAGAGGATGAGCTTACGAGGAAGAGGAAGAGGAA-----  
-----

-----GAGGAA-----

GAGGATGAGCTTCAAGAGAATGATTCGGAGTTCTTCCGGAGTGAAACC---CAG---CAGCCCCAGGCACGAGATGGA--  
----TTTTCCGAAGAA-----GAAGGATGT-----TTTCGAATAAGCCAATTCATGTGGGTCCCT-----

GGAGATCCA---CTCTCTTTCCTATAC---AAAGATACGCCCTTTGTTCGAA-----GTGTTGTCA-----TAT---  
CCAGAG-----GAAGCTACAGAGATTTCAAAG--

-GAGCTTCTTCGTCTTCTTAATCCCAAAACAAGAGGGATGCCCTAAACGCGCACGTCAACGCTGGTGGACC-----

AAGAAGAAGCAAGACAAG-----CACTACGAACTCGTGCTTGTATCGCCAGAGATGGCTT-----ATAACC-----

AAGAGTTCATTATCTAAATCTAATGGATTTTTCCGTTCTAATACT-----

CCATCTGAGAGTTATCAGTATTTATCAAATCTGTTTCTATCT---

AACAGAAGGCTATTGGATCAAATCACAAGACATTCTTTAGAAAA-----  
-----

ATGGATAACACCTTCTCAATTGTAGCCAATATCTTATTACGAATAATTCCGACAACCTCAGGGGAAAAAGAGGCATTTAC  
CTATTACAGAGATGGT-----ATGTCGGCTCAGTCAGAAGGAAATTATGCG---

GAAGCTTTACAGAATTATTATGAAGCTATGCGACTAGAAATTGATCCTTATGATCGAAGCTATGTACTCTATAACATAGG  
CCTTATCCACACTAGTAATGGAGAACACACGAAAGCTTTGGAATATTATTTTTCGGGCACTAGAACGAAACCCGTTCTTAC

CCCAAGCTTTTAAATAATATGGCTGTGATCTGTCATTACCGGGGAGAACAGGCCATTTCGACAGGGAGATTCTGAAATTGCG  
GAGGCTTGGTTTCGATCAAGCCGCTGAGTATTGGAAACAAGCTATAGCGCTTACGCCCGGGAATTATATTGAAGCGCAAAA  
TTGGTTGAAGATCACGAGACGTTTC---GAA-----  
-----ATGATTTGGCGATCAGAACAT-----  
ATATGGATAGAACTTATAGTGGGGTCTCGAAAAATAAGTAATTTCTGCTGGGCCATTCTCCTTTTTTTAGGTTTCATTAGG  
ATTCGTATTGGTTGGAACCTCCAGTTATCTCGGTAAGAATTTGATATCTTTAGTTTCC---TCTCAG-----  
CAAATCCATTTTTTTCCACAGGGGCTCGTGATGTCTTTCTACGGAATCGCGGGTCTCTTTATTAGTTCTTATATGTGGTG  
CACAATTTCTTGGAAATGTGGGTAGTGGCTATGATCGATTGATCGATAAGAAAGGAATAGTGTGTATTTTTTCGTTGGGGAT  
TCCCGGAAAAAATCGTCGTATCTTCTACGATTCCGTATGAAAGATATTCAATCCATCAGAATAGAAGTTAAA-----  
-----GAGGGTATTTATGCGCGTCTG-----GTCCTTTATATGGAAATAAAAAGGG-----  
CAGGGGGCCATTCCCTTGACGCGTAGTGATGATAAT-----TTG---  
ACTCTGCGAGAAATTGAGCAAAAAGCCGCCGAATTGGCCTATTTCTTGCGCGTACCC-CATTTGAAA--GTTTTT-----  
-----

Oryza

-----ATGCCTAGATCC---  
CGTATAAATGGAAATTTATTGATAAGACCTTCTCAATTGTAGCCAATATTTTATTGCGAATAATCCGACAACCTCCGG

GGAAAAAAGGGCATTACTTATTATAGAGATGGG-----ATGTTGGCTCAATCCGAAGGAAATTATGCG---  
GAAGCTTTGCAAAATTATTATGAAGCTACGCGACTAGAAAGTGATCCCTATGATCGAAGTTATATACTCTATAACATAGG  
CCTTATACACACAAGCAATGGAGAGCATACAAAGGCTTTGGAATATTATTTCCGGGCACTAGAACGAAACCCCTTCTTAC  
CACAAGCTTTTTAATAATATGGCCGTGATCTGTCATTAC---  
GGAGAACAGGCCATTCTACAGGGTGATTGAGAAATTGCAGAAGCTTGGTTTTGATCAAGCTGCTGAGTATTGGAAACAAGC  
TATAGGCCTTACTCCGGGAAATTATATTGAAGCACAGAAGCTGGTTGAAGATTACGAAGCGCTTT---GAATTTGAA-----

ATGAATTGGCGATCAGAACAC-----  
ATATGGATAGAACTTCTAAAAGGTTCTCGAAAAAGAGGTAATTTTTTCTGGGCCTGTATTCTTTTTCTAGGTTCACTAGG  
ATTCTTAGCGGTTGGGGCTTCCAGTTATCTTGGTAAGAATATTATATCTGTACTTCCA---TCTCAA-----  
CAAATTTCTTTTTTCCACAGGGGTCGTGATGTCTTTCTACGGAATCGCAGGCCTATTATTAGCGCTTACTTGTGGTG  
CACTATTTTGTGGAATGTAGGCAGTGGTTATGACCGATTTCGATAGAAAAGAGGGAGTAGTGTGCATTTTTCGTTGGGGAT  
TCCCTGGAATAAAACGTCGCGTCTTTCTTCGATTCTTATGCGGGATATCCAATCAATTAGAATTCAGGTTAAA-----  
-----GAAGGTCTTTTTCTCGTCGT-----ATCCTTTATATGGAAATCCGGGGC-----  
CAGGGGGCCATTCCCTTGACTCGTACTGATGAGAAG-----  
TTTTTTACTCCACGAGAAATTGAACAAAAGCTGCCGAATTGGCTTATTTCTTGCGCATACCA---ATGGAA---  
GTATTT-----

Panax

-----GATCGTGACCTTCAT-----  
ACGGAGCTGGAAGCTG-----CTAACT-----ATGGATATGATGCCGGAA-----

ATAGACCGATTTTATATCACCCCTTCAATTGCAATTAGCAAAAGCAATGTCTCCTTGCATAATATGGATTCCAAACATTCA  
TGATCTGGATGTGAATGAGTGAAT-----  
TACTTCTCCCTCGGTCTATTAGTGAACCATCTCTCC-----AGGGATTGTGAAAGATGT---TCCACTAGAAAT---  
ATTCTTGTATTGCTTCGACTCATATTTCCCAAAAAGTGGATCCCGCTCTAATAGCTCCGAATAAAATTAATACGTGCAT  
TAAGATACGAAGGCTTCTTATTCCACAACAACGAAAGCACTTTTTCCACCCTTTCATATACTAGGGGATTTCCG-----  
TTGGAAAATAAAATGTTCCATACT-----  
AATGGATTCGGGTCCATAACCATGGGTTCCAATGCACGAGATCTTGTAGCACTTACCAATGAGGCCCTATCGATTAGTAT  
TACACAGAAGAAATCAATTATAGACACTAATACAATTAGATCCGCTCTTCATAGACAAACTTGGGATTTGCGATCC-----  
-----

CAGGTAAGATCGGTTCAGGATCATGGGATCCTTTTTCTATCAGATAGGAAGGGCTGTAGCACAAAATGTACTTCTAAGTAA  
TTGCCCC-----ATAGATCCTATATCTATCTATATGAAGAAGAAATCA-----TGTAAC---  
GAAGGGGATTCTTATTTGTACAAATGGTACTTTCGAACTT-----  
GGAACGAGCATGAAGAAATTAACGATACTTCTTTATCTTTTGTAGTTGTTCTGCCGGATCGGTCGCTCAAGATCTTTGGTC  
TCTACCCCGACCCGATGAAAAAATGGGATCACTTCTTATGGACTCGTTGAGAAT-----  
GATTCTGATCTAGTTCATGGC-----CTATTA-----GAAGTA-----  
GAAGGCGCT-----CTGGTGGGA-----TCCTCGCGGACA-----

-----GAAAAAGATTGCAGTCAGTTTGATAATGATCGAGTG-----  
ACATTGCTTCTTCGGCCCGAACCAAGGAATCCCTTAGATATGATGCAAAATGGATCTTGTCTATCCTT---  
GATCAGAGATTTCTCTATGAAAAAACGAATCGGAGTTTGAAGAA-----  
GGGGAAGGAGAAGGAGCCCTC-----GACCCG---CAACAGATAGAGGAGGAT-----TTATTT---  
AATCACATAGTTTGGGCTCCTAGAATATGGCGCCCT---TGGGGCTTTCTA-----  
TTTGATTGTATCGAAAGGCCCAATGAA-----TTGGGATTTCCCTATTGG-----

-----  
TCCAGGTCATTTCCGGGGCAAGCGGATCCTTTATGATGAA-----  
GAGGATGAGCTTCAAGAGAATGATTCGGAGTTCTTGCAGAGTGGAAACC---ATG---CAGTACCAGACACGAGATAGA--  
----TCTTCAAAGAA-----CAAGGCCTT-----TTTCAATAAGCCAATTCATTTGGGACCT-----

GCAGATCCA---CTCTTTTTCTATTCT---AAAGATCAGCCCTTTGTCTCT-----GTGTTTTCA-----CAT---  
CGAGAATTATTT-----GCAGATGAAGAGATGTCAAAG--  
-GGGCTTCTT-----ACTTCCCAACA-----GATCCTCTACATCTATATATAAACGCTGGTTTATC-----  
AAGAAGACGCAAGAAAAG-----CACTTCGAATTGTTGATTAATCGCCAGAGATGGTTT-----AGAACC-----  
AATAGTTCATTATCTAAT-----GGATCTTTCCGTTCTAATACT-----  
CTATCCGAGAGTTATCAGTATTTATCAAATCTATTCCCTATCT---  
AACGGAACGCTATTGGATCAAATGACAAAGACATTGTTGAGAAAAAGATGGCTTTTCCCGGATGAAATGAAAATTGGATT  
CATGGAACAGGAGAAAAGATTTCCCATTCCTTAGCAGGAAAGACATGTGGCCATGA-----ATGCCTAGATCG--  
--

AGGATAAATGGAAATTTTATTGATAAGACCTTTTCAATTGTAGCCAATATCTTATTACGAATAATTCCCACAACCTTCAGG  
AGAAAAAGAGGCATTTACCTATTACAGAGATGGG-----ATGTCAGCTCAATCCGAAGGAAATTATGCG---  
GAAGCTTTACAGAATTATTATGAAGCTATGCGACTAGAAATTGATCCCTACGATCGAAGTTATATACTCTATAACATAGG  
ACTTATCCACACAAGTAACGGAGAACATACAAAAGCTCTGGAATATTATTTTCGAGCGCTAGAACGAAATCCGTTCTTAC  
CACAAGCTTTTTAATAATATGGCTGTGATCTGTCATTACCGGGGAGAACAGGCCATTTCGACAGGGGAGATTCTGAAATAGCG  
GAGGCTTGGTTCGATCAAGCCGCTGAGTATTGGAACAAGCTATGGCGCTTACTCCTGGTAATTATATTGAAGCGCATAA  
TTGGTTGAAGATCACGAGGCGTTTC---GAA-----

-----ATGAGTTGTCGATCAGAACAT-----  
ATATGGATAGAACCTATAACGGGGTCTCGAAAAACAAGTAATTTCTGCTGGGCCGTTATCCTTTTTTTAGGGTCATTAGG  
ATTCTTATTGGTTGGAACCTCCAGTTATCTTGGTAGAACTTGATATCTTTATTTCCG---TCTCAG-----  
CAAATCCTTTTTTTTCCACAGGGGATCGTGATGCTTTCTATGGAATCGCGGGTCTCTTTATTAGCTCCTATTTGTGGTG  
CACACTTTCGTTGAATGTAGGGGGTGGTTATGATCGATTTGATAGAAAAGAAGGAATGGTGTGTATTTTTCGTTGGGGAT  
TTCTTGAAAAAATCGTCGCATCTTCTCCGATTCTTATAAAAAGATATTAGTCCGTCAGAATAGAAGCTAAA-----  
-----GAGGGTATTTATGCTCGTCGT-----GTCCTTTATATGGACATCAGAGGT-----  
CAGGGGGCCATCCCCTTGACTCGTACTGATGAGAAT-----GTT---  
ACTCCACGGGAAATTGAACAAAAGCTGCCGAATTGGCCTATTTCTTGCCTGTACCG---ATTGAA---GTCTTT-----  
-----

Pelargonium

CACTTCTGGGGTATTGAGGAGTGGAGTCTTCTGATACTCGTGAGGATGACGAGATTGAGGATCAGGCTGAGATGGATA  
CGAGACGTGATCTTGATGGTATTGAGTATACGCATGCTATTCCAGGATATGATTGATTTGGGGATTTCTGTTGATGCTCAG  
TTAAATTTTTTACCTGAGTCCATTCTCATCAACGAAATTGAGGGTCATGATGTGGATGAGCTGGACGAGGCGGAGACCGA  
GTTGTGGGAGTTATGGATGGAGGAATGGGACCGG-----  
-----

-----  
CACCTACTTGGTATCTCCCTTCAATTGCGATTAGTAAGAGCAATGACTCCTTGATATTATGGATTCCAAACATTCATGA  
TGTGGATCTGGAGGATAGGACA-----  
ACCCTGGCCGGATTAATGAACTCTCTCTCT-----GGGGATTCTGAAGGACGT---TCCACTAGAAAAG---  
ACTCTTGTTATTGCTTCGACTCATCTTCCCAAAAAGTGGATCCCCTCTAATAGCTTCAAATAGATTCAATACATGCAT  
TAAGGTACGAAGGCTTCTTAGTACACAAGAACGAGAGCGCTTTTTCACTCTTTTATATACTAGAGGATTTTAC-----  
TTTGAAAAGGAAATCTTCGATACT-----AATGGATTCCGGTCTATAACC-----  
ACACAAGATCTTGAGCACTTACCAATGAGGCCCTATCGATTAGTATTACCCAAAAAATCCATTATAGACACTAATAC  
AATTTCGATTTGCTCTTCATAGGCAAACCTTGGGCTGTGGAATCC-----  
CGGTCAATCTCGATTTCCGATCACGGGATCCTTTTCTATCAGACAGGAAGGGCTCTTGCACAAAATCTATTTCTAAGTCA  
AGGCCTC-----ATAGATCCTATCTCTGTATATATAAAGAAGAAGTCG-----  
TGTAACGACGACGGTTATTCTTATTTGTACAGATGGTACTTAGAGCTT-----  
GGAACGAGCATGAAGAGGTTAACGATACTTCTTTATCTTTTGTGTTGTTTGGCCGGATCGGTGCTCAAGACCTTTGGTC  
TCCACCTGGGCCCGATGACAAAGCGGAGATGTTTTCTTATGGACTTGTGGAAT-----  
GATTCTCATCTAGCTCAGGGC-----CTATTA-----GAACTA-----  
GAAGGCGCT-----CTGGTG-----GCCTCAGGGACA-----  
-----  
-----

-----GAAAAGCTTGCAGTCGGTTTGATAATGATCAAGTG-----  
ACACTGCTTTTTTCGGGCCGAACCAAGC-----TTAGATAGAATGCAAGATGGATTTTGTCTATCTTT---GAACAA--  
-----GAG-----GGAGAA---GAAGCAGCCCCT-  
-----GGC-----CTAGAGAAGCCT-----TTAGTC---  
ACTCACATAGTTTTCGGCTCCTAGAATATGGAACCCT---TGGCTCATTCTA-----TTTGATTGGATCGAT--

-----  
ATCGAGGAGGCTTCGCGTAAAGAGGAAGAGGCTGAGCTTCAAGATGAAGAGGCTGAGCTTCAGGATGAAGGGGCTGGGCG  
TAAAGATGAAGAGGCTGAGCTTCAAGAGTTTCAAGATCTTGAAGATCCTCAAGATCAAGAGGGTGGGCTTCAAGAGCTTC  
AAGGTCTTCAAAGGAAGAGGCCTATCTTTATCAAAGGCTCTTGAGCTTCAA-----  
-----

-----GCTCAA-----

GAGGATGAGCTTCAAAGTATGGTCCGGGGTCTTGGAGAGTGAACATAATGAAGAAGTATCCGACACGAAATCGATT  
TCGATTTTTACAGAA-----CAAGGCTTT-----TTTCAAGCAAGCCAATTCATTTGGTACCCC-----  
GCGGATTCA--CTCTTTTTCTACTC---AAAGAGCAGGCTCTTGGCTTT-----GTGTTTTCG-----CAG---  
CCAGAGTTCTTT-----

GCAGATGAAGAGATCTCAAAGAAGGGCTTCTTGCTTTG---ACTGTCCAAAGA-----  
CTTCTTTCTCCACAACCTTGCCTGGTTTATC-----AAGAAAAGGCAAGAAAG-----  
CACTTCGAATCTTGATTCATCGCGAGAGATGGCTT-----AGAACG-----AATAGTTCATTATCTAAT-----  
GGATTTTTCTGTTCTAAGACTCAGACTCTATTTGAGAGTTATCAGTATTTATCAAATCTCTTCTATCT---  
AACGGAAGGCTAGTGGATCAAATGACAAAGACATTGTTGAGAAAAAGATGGATTTTCCCGGATGAAATGAAAATTCAAAT  
TGGATTCATGTATACAGGAGAAGGGTTTCCCATTACTTCGCCGAAAGATATGTGGCCATGAAATAGATGCCTAGATCA--  
--

CGGATAAATGGAAATTTTATTGATAAGACCTTCTCAATTGTAGCCAACATCTTATTACGAATAATTCCTACAACCTCAGG  
AGAAAGGGAGGCTTTTACCTATTACAGAGATGGG-----ATGTCGGCTCAATCCGAAGGAAATTATGCG---  
GAAGCTTTCGAGAATTATTATGAAGCGATGCGACTAGAAATGGATCCCTATGATCGAAGCTATATCCTCTATAACATAGG  
CCTTATCCATACAAGTAACGGAGAACATACGAAAGCTTTGGAATATTATTTTCGGGCACTCGAGCGAAACCCGTTCTTAC  
CACAAGCTTTGAATAATATGGCTGTGATCTGTCATTACCGGGGCGAACAGGCCATTTCGCCAGGGGAGATTCCGAAATTGCG  
GAGGCTTGGTTCGACCAAGCTGCTGAGTATTGGAACAAGCTATAGCGCTTACTCCTGGTAATTATATTGAAGCGCAGAA  
TTGGTTGAAGATTACGAGGCGTTTC---GAATAA-----

-----ATGAGTTGTCGATCTGAAAT-----

CTATGGCTAGAACTTATAGCGGGTCTCGAAAAACAAGTAATTTCTCTGGGCTCTTATCCTTTTTTTAGGTTTATTTCGC  
ATTCTTATTGGTTGAACTTCCAGTTATCTTGGCAGAAATTGGATATCTTTATTTCCG---TCTCAG-----  
CAAATTTCTTTTTTCCCCCAAGGGGTTGTGATGCTTTCTATGGAATCGCGGGTCTCTTTATAAGCTCTTATTTGTGGTG  
CACAATTTTATGGAATGTAGGTAGTGGTTATGATCGATTTCGATAGAAAAGAAGGAATAGTGTGTATCTTTTCGTTGGGGAT  
TCCCCGGAAGAAATCGTTCGTATCTTCTACGATTCTTATGAAAGATATTAGTCCATCAGAATAGAAGCTAGA-----  
-----GAGGGTTTTTATGCTCGTCGT-----ATCCTTTATATGGAATCAGAGGT-----  
CAGGGGGCCATTCCCTTAACCCGTAAGTCCGAGAAT-----TGG---  
ACTCCACGCGAAATTGAGCAAAAGGCTGCTGAATTAGCCTATTTCTTGCGTGTCCCG---ATGGAA---GTCTTTTGA--  
-----

Phalaenopsis -----

-----GACCTTGATATTGATAAG-----

GAGCTGCTAACTATGACGAATGTGCTAACT-----ATGTATATGACGACGAAA-----  
-----

ATAGACCGATTTGATATCACCTTCAATTCGAATTAGCAAAAGCAATGTCTCCTTGCATAATATGGATTCCAAACATTCA  
TGATCTGCATGTGAATGAGTCGAAT-----

TACTTATCCCTCGATCTATTAGAGAACTATCTCTCC-----AGGGATTGTGAAAGATGT---TCCACTGGAAAG---  
ATTCTTGTTATTGCTTCGACTCATATTTCCCAAAAAGTGGATCCCGCTCTAATAGCTCCAAATAAATTAATACATGCAT  
TAAGATACGAAGGCTTCTTCTCCACAACAATAAAGCACTTTTTCATTCTTTTATATACTAGAGGATTTTAC-----  
TTGAAAAGAAGATGTTCCATACT-----

AACGGATTCGGGTCCATAACCATGGGTTCCAATGCGCGAGATCTTGTAGCACTTATCAATGAGGCCCTATCAATTAGTAT  
TACACAGAAGAAATCCATTATAGAACTAATAAATTAGATCAGCTCTTCATAGAAAACTTGGGATTTTCGATCC-----  
-----

CAGATAAGATCGGTTCAGGATCATGGGATCCTTTTTCTATCAGATAGGAAGGGCTGTTACACAAAATGTACTTCTAAGTAA  
TTGCCCC-----ATAGATCCTATATCTATCTATATGAAGAAGAAATCA-----TGTAAG---

GGAGGGGATTCTTATTTGTACAAATGGTACTTTCGAACCT-----

GGAACGAGCATGAAGAAATTAACGATACTTCTTTATCTTTTGTAGTTGTTCTGCCGGATCGGTCGCTCAAGATCTTTGGTC  
TTCATCCAGACACGATGAAAAAATTTGGATCACTTCTTATGGATTTCGTCGAGAAC-----

GATTCTGATCTAGTTTCATGGC-----CTATTACTATTACTATTAGAAGTA-----

GAAGGCGCTCTGGCTCTGGCGGA-----TCCTCACGGACA-----  
-----

-----GAAAAAGATTGCAGTCAGTTTGATAATAATCGAGTG-----  
 ACATTACTTCTTCGGTCCGAACCAAGGAATCAGTTAGATATGATGCAAAATGGATCTTTGTTCTATCGTT---  
 GATCAGAGATTTCTATATGAAAAATACGAATCGGAGTTTGAAGAA-----GGGGAA-----  
 GGGGCCCTC-----GATCCG---CAACAGATAGAGGAGGAT-----TTATTC---

AATCACATAGTTTGGGCTCCTAGAATATGGCGA-----  
 TTTGATTGTATCGAAAGGCCACTGAA-----TTGGGATTTCCCTATTGG-----

ACTGGGTCATTTCCGGGGCAAATGGATCATTATCATAAA-----  
 GAGGGTGAGCTTCAAGAGAATGATTCGGAGTTCTTGCAGAGTGGAACC---ATG---CAGTACCAGACACGAGATAGA--  
 ----TCTTCCAAAGAA-----CAAGGCTTT-----TTTCGAACAAGCCAATTCATTTGGGACCCT-----  
 GCGGATCCA---TCCTTTTCCCTATTC---AAAGATCAGCCCTCTGTCTCT-----GTGTTTTCA-----CGT---  
 CGAGAATTTCTT-----GCAGATGAAGAGATGTCAAAG--  
 -GGGCTCATT-----GCTTCCCAAACA-----AATCCTCTACATCTATATAAACGCTGGTTTCATC-----  
 AAGAATACGCAAGAAAAG-----CACTTCGAATTGTTGATTCATCGCCAGAGATGGTTT-----AGAACC-----  
 AATAGTTCATTATCTAAT-----GGATCTTTCGTTCTAATACT-----  
 CTATCCGAGAGTTATCAGTATTTATCAAATCTGTTCCCTATCT---  
 AACGGAACGCTATTGGATCAAATGACAAAGACATTGTTGAGAAAGAGATGGCTTTTCCCGGATGAAATGAAACATTTGAT  
 TCATGTAACAGGAGAAAGATTCCCCATTCCTTAG-----ATGCCTAGATCT--

CGAATAAATGGAAATTTTATTGATAAGACCTCTTCAATTGTAGCCAATATTTTTATTACGAATAATTCCGACAACCTTCAGG  
 AGAAAAAAAGGCATTTACCTATTACAGAGATGGG-----ATGTCGGCTCAATCCGAAGGAAATTATGCA---  
 GAAGCTTACAGAAATTTATGAAGCTACGCGACCAGAAATTTGATCCCTATGATCGAAGTTATATACTCTATAACATAGG  
 TCTTATACACACAAGCAACGGAGAGCATACAAAAAGCTTTGGAATATTATTTCCGAGCACTAGAACGAAATCCATTTTAC  
 CACAAGCTTTTTAATAATATGGCCGTGATCTGTCATTACCGGGGAGAACAGGCCATTCTACAAGGCGATTTCGGAAATTGCG  
 GAGGCTTGGTTCGATCAAGCTGCTGAGTATTGGAACAAGCTATAGCGCTTACTCCAGGGAATTATATTGAAGCACATAA  
 TTGGTTAAAAATAACGAGGCGTTTT---GAA-----

-----ATGAACTGGCGATCAGAACAT-----  
 ATATGGATAGAACCTTATAACGGGGTCTCGAAAAACAAGTAATTTTTGCTGGGCCTGTATCCTTTTTTTTAGGTTCACTAGG  
 ATTCTTAGTGGTGGAACTTCCAGTTATCTTGTTAAAAATCTGATATCCGTATTTCCG---TCTCAG-----  
 CAAATCCTTTTTTTCCACAAGGGATCGTGATGTCTTCTATGGGATCGCAGGTCTATTCTATTGTTCTTATTTGTGGTG  
 CACAATTTATGGAATGTAGGTAGTGGTTATGACCGATTTCGATAGAAAAGAAGGGATAATGTCCCTTTTTCGTTGGGGAT  
 TCCCTGGAAGAGATCGTCGCATCTTCTTTCGTTTTTTCTGAAAGATATCCAATCAATCAGAATGGAGGTGAGA-----  
 -----GAGGGTCTTTTTCTCGTCGT-----GTCCTTTATATGGAATCAAGGGT-----  
 CAAGGAGCCATTCCCTTGACCCGTAAGTGTGAGGAT-----TTG---  
 ACTCCACGAGAAATTGAACAAAAGCTGCCGAATTGGCCTATTTCTTGCGCGTACCC---ATTGAA---GTATTT-----

Pinus -----

-----  
 ACCTTAGAATTGGCGAAAAGAATGTCTCCTTGCATAATATGGATTCCAAACATTCATGAAGTTGAAATTAATGACGCAAC  
 TAATAATTTATTTGGTTTTGGCTTCACTGACTTGTTCCTTAGTGTATTAATGAACAATCTCTTTAGATTTAGAGATGGTG  
 AAAAAGAT---TCTATGAGAAAT---  
 ATTCTTGTATTGCTTCGACTCATATCCCCAAAGAGTGGATCCAGCTCTAATAGCTCCAAATCGATTAGATAGATCGAT  
 CAATATTCGAATGCTTGTATTCCACAACGACAAAGGGAATTTCTATTTCTTTATGTAGCAAAGGATTATAC-----  
 TCGGTAATA-----  
 TTTCCCGATGAATTTGGATCTATAACCATAGATTATGCTGTACGAGATCTAGCAGCACTGGCCGATGAAGCCTTAATACT

TAGTATTACCCGAAATAAATCAGTTATAGACACTAATACAATTCGATCCGCTATTTATAGGCAAATTTTTTCATTTACAAT  
CTATGGATAATCAGGTTGGATCCAGTCAAATGACGAAAGAATTATCTACAAAGTAGGAAAGGCTTTTATACAAAATACG  
CTTAGAAGAAATTCTCCC-----ATGAATCCTCTATCTACA-----AAAAAGGAATTA-----  
TGGAAG---

AAAAGGTTTTGTTATTTGTCCGAATGGTATTTAGAACCTTCGATTGCCGAAACAACCTATGAAGGAATTGACCATACTTCC  
CCATATTTTGGGTTGCTTGGCCGGATCAGCGGCTCGAGATTCTTGGTCTATATCAGAACGAAATAGAGAGAATTGGATTC  
CTTTCGATAAATTAGCTGAGCAT-----GATCTTGATATAGCTTCTAGT-----CTTTTA-----  
-----GAAAGTATT-----CTGGTGGAGTTTCCATTTTCTAGGTTA-----  
-----  
-----  
-----  
-----

GGAATATGTCGGGGTAAGTCCGATAAGGATCAGATA-----  
ACATTTGCTCCTCAACTCAAATGAGAGATAATCTAGATCTGATACGA-----  
----TTTATGAAAGAATATGAATTGAAGTTTACTCCC-----GGCGCAAACAAAGG-----  
-----GATATGGATGAAGAA-----TTAATA-----  
AAGAATGTAGTTTGGACTCCTAGGATCTGGCGTCTT---AGT---  
TTTCTTCGCAGTAATAGATTTCGATCATATAAAAAACACCCAATTCA-----  
TTGGGATCTTCGTATCAGTTCGGATCGTTAAGAAAACGGCAGATGGACAGATCTCTATTTTCTATAACAATATCCGAAGCA  
ATATAAATACTCTAAGAAACCCTGTTCTTTATAGGAAGACGATTTCTTTGGGATTCCTTCTATTTCAAGAGCAGCGCC  
CTGTGTTTTACGCCCAGAAATTTTCGCAAATGAAGAACTGCTGAAAAGGCTTTATATTACTTATGGTGCAAGAAGATTA  
ATAGCACAACTGATTTTTTCCCTAAAAAAGTATCCAAAGTTTTTTTCGTAGATATGATTCAAATCCACGATCAATTC  
GGTTTTGGTCATGAATTGGTGGAAACCATTGTCTCTTAGACATAGACATATCGAGCATTTCAAACGCATTCAAGCGATTG  
GTATCCAATTGGAACGTATG-----  
-----  
-----  
-----

-CAGCCA-----TATTTTCTATATATTATATAACCGTTGGTTGACC-----  
GAAAATTCGAGAGAAAGGGTTGACCGCTTCCAATCGTTAATTCATCGCCAAAGATGGCTC-----GGAACC-----  
AATAGGTTATTATCTAAT-----GAATCTTTTCTTTATAATACT-----  
CTATTCGAGAGTTATCAATATTTATCAAATCTGTTCTATCT---  
AACAGAATGTTATTGGATCAAATTACAAAGACATTGTTGGAGAATAAATGGCTTTTTTCCCAATGAAATTGAACACTCAAT  
TCATACAACAGGATTAAGATTTGATATCAGCTGGGAGAATATGGAATGA-----ATGCCTAGATCT-  
--

CAGAGAAATGACAATTTTATTGATAAGACCTTCACAATTGTAGCAGATATATTATTGCGAATAATCCCGATGGCTCCGGG  
GGAGAAAGAAGCATTTACCTATTACAGAGATGGA-----ATGTCAGCTCAATCGGAAGGGGAATATGCG---  
GAAGCTTTACAAAATTATTATGAAGCTATGCGACTGGAACTGATCCTTATGATCGAAGTTATATACTATATAATATAGG  
TCTTGTGCATACAAGTAATGGGGAACATACGAAGGCTTTGGAATATTATTTCCAAGCATTAGAACGGAACCCATCCTTAC  
CACAAGCTCTTAATAATACGGCCTTGATCTGTCATTACCGAGGAGAACAGGCCATTTCGACAGGGGAGATCCTGAAACTGCG  
GAGGCTTGGTTCGATCAAGCTGCTGAGTATTGGGAACAAGCTATAGCACTTGCTCCGGGCAATTACATCGAAGCACAAAA  
TTGGTTAAAGATTACAGGACGCTTTGGAGAA-----  
-----ATGAATCGTCGATCCAAATGG-----

CTCTGGATAGAACCTATAACAGGGTCTCGAAAAAGAAGTAATTTCTTTTGGGCTTGTATCCTCTTTCTGGGTTCACTAGG  
ATTTTTCTAGTCGGGATCTCGAGTTATTTGGTGAGAACCTGATACCCCTATTGTCA---TCTCAG-----  
CAAATACTCTTTGTTCCACAAGGAATTGTAATGTGTTTTTATGGTATTGCGAGTCTGTTTCATTAGCTCTTATCTGTGGTG  
CACAATTTTGTCAATGTGGGTAGTGGCTATAATAAGTTTCGATAAAAAAAGGAATTGTATGTCTTTTTCTGTTGGGGAT  
TTCCCAGAAATAAATCGTCGTATTTTCCACGATTTCTTATGAAGGATATTGAGATGATCAAATGGAATTCAA-----  
-----GAAGGTATTTCCCTCGTCGT-----GTTCTTTATATGGAATAAAGGGC-----  
CGACAAGACATTCCTTTAACTCGTACTGGTGATAAT-----GTG---  
AACCTAAGGGAGATCGAACAGAAAGCCGCTGAATCAGCCGTTTCTTGCCTGTATCC---ATTGAA---GGGTTT-----  
-----

Piper

-----GATGACCTTGAT-----ACG-----





TCCCTGGAATAAATCGCCGCATCTTCTACGAGTATTTATGGGAGATATCCAGTCCATCCGAATCGAAGTCAAG-----  
-----GGGGGTGTTTATCCTCGTCGT-----GTCCTTTATATGGACATCAGAGGC-----  
CAGGGGTCCGTCCCCTTGACTCGTACTGATGAGAAT-----TTC---  
ACTCCACGAGAAATTGAACAAAAGCTGCGGAATCGGCCTATTTTTTTCGCGGTACCA---ATTGAA---GTATTT-----  
-----

Platanus

-----GATGATGACCTTGAT-----ACG-----  
GAGCTGCTAACTATGATGAATGCGCTAACT-----ATGGATATGACGCCGAAA-----

ATAGACCGATTTGATATCACCCCTTCAATTCGAATTAGCAAAAGCAATGTCTCCTTGCATAATATGGATTCCAAACATTCA  
TGATCTGTATGTGAATGAGTCGAAT-----  
TACTTATCCCTCGGTCTATTAGTGAACCTATCTCTCC-----AGAGATTGTGAAAGATGT---TCCACTAGAAAT---  
ATTCTTGTTATTGCTTCGACTCATATTTCCCAAAAAGTGGATCCCCTCTAATAGCTCCGAATAAATCAAATACATGCAT  
TAAGATACGAAGGCTTCTTATTCCACAACAACGAAAGCACTTTTTCACTCTTTCATATACTAGGGGATTTTCAC-----  
TTGGAAAAGAAAATTTTCCATACT-----  
AATGGATTCCGGTCCATAACCATGGGTTCCAATGCACGAGATCTTGTAGCACTTACCAATGAGGCCCTATCAATTAGTAT  
TACACAGAAGAAATCCATTATAGACACTAATACAATTAGATCCGCTCTTCATAGACAAACTTGGGATTTGCGATCC-----  
-----

CAGGTAAGATCGGTTCCAGGATCATGGGATCCTTTTTCTATCAGATAGGAAGGGCTGTTGCACAAAATGTACTTCTAAGTAA  
TTGCCCC-----ATAGATCCTATATCTATCTATATGAAGAAGAAATCA-----TGTAAG---  
GAAGGGGATTCTTATTTGTACAAATGGTACTTCCGAACCT-----  
GGAACGAGCATGAAGAAATTAACGATACTTCTTTATCTTTTGTGTTCTGCCGGATCGGTCGCTCAAGATCTTTGGTC  
TCTACCCGGACCCGATGAAAAAATGGGATCACTTCTTATGGATTTCGTTGAGAAT-----  
GATTCTGATCTAGTTCATGGC-----CTATTA-----GAAGTA-----  
GAAGGCGTT-----CTGGTGGGA-----TCCTCGCGGACA-----  
-----  
-----  
-----

-----GAAAAAGATTGCAGTCAGTTTGATAATGATCGAGTG-----  
ACATTGCTTCTTCGGTCCGAACCAAGGAATCCCTTAGATATGATGCAAAATGGATCTTGTCTATCGTT---  
GATCAGAGATTTCTATATGAAAAATACGAATCGGAGTTTGAAGAA-----GGGGAA-----  
GGAGCCCTC-----GACCCG---CAACAGATAGAGGAGGAT-----TTATTC---  
AATCACATAGTTTGGGCTCCTAGAATATGGCGCCCT---TGTGGCAATCTA-----  
TTTGATTGTATCGAAAGGCCCAATGAA-----TTGGGATTTCCCTATTGG-----  
-----  
-----  
-----

GCCAGGTCATTTCCGGGCAAGCGGATCATTATCATAAA-----  
GAGGATGAGCTTCAAGAGAATGATTCGGAGTTCTTGCAGAGTGGAAACC---ATG---CAGTACCAGACACGAGATAGA--  
---TCTTCCAAAGAA-----CAAGGCTTT-----TTTCGAATAAGCCAATTCATTTGGGACCCT-----  
GGAGGTCCA---TTCTTTTTTCTATTC---AAAGATCAGCCCTTTGTCTCT-----GTGTTTTCA-----CGT---  
CGAGAATTCCTT-----GCAGATGAAGAGATGTCAAAG--  
-GGGCTTCTT-----ACTTCCCAAACA-----AATCCTCCTACATCTATATATAAACGCTGGTTCATC-----  
AAGAATACGCAAGAAAAG-----CACTTCGAATTGTTGATTCATCGCCAGAGATGGCTT-----AGAACC-----  
AATAGTTCATTATCTAAT-----GGATCTTTCCGTTCTAATACT-----  
CCATCCGAGAGTTATCAGTATTTATCAAATCTGTTCTATCT---  
AACGGAACGCTATTGGATCAAATGACAAAGACATTGTTGAGAAAGAGATGGCTTTTTCCCGGATGAAATGAAACATTTGAT  
TCATGTAACAGGAGAAAGATTTCCCATTCCTTAG-----ATGCCTAGATCG--  
--

CGAATAAATGGAAATTTTATTGATAAGACCTCTTCAATTGTAGCCAATATCTTATTACGAATAATTCGACAACCTTCAGG  
AGAAAAAGAGGCATTTACCTATTACAGAGATGGG-----ATGTCAGCTCAATCCGAAGGAAATTATGCG---  
GAAGCTTTACAGAATTATTATGAAGCTATGCGACTAGAAATTGATCCCTATGATCGAAGTTATATACTCTATAACATAGG

CCTTATCCACACAAGCAACGGGAGAACATACAAAAGCTTTAGAAATATTATTTCCGGGCACTAGAACGAAACCCATTCTTAC  
CACAAGCTTTTTAATAATATGGCCGTGATCTGTCATTACCGGGGAGAACAGGCCATTTCGACAGGGAGATTCTGAAATTGCG  
GAGGCTTGGTTCGATCAAGCTGCTGAGTATTGGAAACAAGCTATAGCACTTACTCCAGGTAATTATATTGAAGCACATAA  
TTGGTTGAAGATAACGAGGCGATTCT---GAATAA-----

-----ATGAACTGGCGATCAGAACGT-----  
ATATGGATAGAACTTATAACGGGGTCTCGAAAAACAAGTAATTTTTGCTGGGCCTTTATCCTTTTTTTAGGTTTATTAGG  
TTTCTTATTGGTTGGAACCTCCAGTTATCTTGGTAGGAATCTGATATCCTTATTTCCG---TCTCAG-----  
CAAATCATTTTTTTTCCACAAGGGATCGTGATGTCTTTCTATGGGATCGCAGGTCTGTTTATTAGCTCCTATTTGTGGTG  
CACAATTTTCGTGGAATGTAGGTAGTGGTTATGATCGATTTCGATAGAAAAGAAGGAATAGTGTGTATTTTTCGTTGGGGAT  
TTCTTGGAAAAACCGTTCGATCTTCTTCGATTCTTTATGAAAGATATTCAGTTCGATCAGAATAGAAGTTAAA-----  
-----GAGGGTCTTTATCCTCGTCTGTT-----GTTCTTTATATGGAATCAGAGGC-----  
CAGGGAGCCATTCCCTTGACTCGTACTGATGAGAAT-----TTG---  
ACTCCACGAGAAATTGAACAAAAGCTGCTGAATTGGCCTATTTCTTGC GCGTACCA---ATTGAA---GTATTTTGA--  
-----

Populus

-----GACCGTGACCTTGAT-----  
ACGGAGCTGGAGCTTCTAACTAGGATGAATGTACTAACT-----ATGGATATGATGCCGGAA-----

ATAGACCGATTTTATATCACCTTCAATTCGAATTAGCAAAAGCAATGTCTCCTTGCATAATATGGATTCCAAACATTCA  
CGATCTGGATGTGAATGAGTCGAAT-----  
TACTTATCCCTCGGTCTATTAGTGAACCTATCTCTCC-----AGGGATTGTGAAAGATGT---TCCACTAGAAAT---  
ATTCTTGTATTGCTTCGACTCATATTCCTCAAAAAGTGGATCCCGCTCTAATAGCTCCGAATAAATTAATACATGCAT  
TAAGATACGAAGGCTTCTTATTCCACAACAACGAAAGCACGTTTTTCACTCTTTTATATAGTAGGGGATTTTAC-----  
TTGGAAAAGAAAATGTTCCATACT-----  
AAGAGATTCGGGTCCGTAACCATGGGTTCCAATGTACGAGATCTTGTAGCACTTACCAATGAGGCCCTATCGATTAGTAT  
TACACAGAAGAAATCAATTATAGACACTAATATAATTAGATCTGCTCTTCATAGACAAAACCTTGGGATTTGCGATCC----  
-----

CAGGTAAGATCGGTTCAGGATCATGGGATCCTTTTTCTATCAGATAGGAAGGGCTGTTGCACAAAATGTATTTCTAAGTAA  
TTGCCCC-----ATAGATCCTATATCTATCTATATGAAGAAGAAATCA-----TGTAAC---  
GAAGGGGATTCTTATTTGTACAAATGGTACTTTCGAACCT-----  
GGAACGAGCATGAAGAAATTAACGATACTTCTTTATCTTTTGTAGTTGTTCTGCCGGATCGATTGCTCAAGACCTTTGGTC  
TCTACCCGGACCCGATGAAAAAATGGGATCACTTATTATGGACTTGTGAGAAT-----  
GATTCTGATCTAGTTCATGGC-----CTATTA-----GAAGTA-----  
GAAGGCGCT-----CTGGTGGGA-----TCCTCACGGACA-----

-----GAAAAAGATTGCAGTCAGTTTGATAATGATCGAGTG-----  
ACATTGCTTCTTCGGCCCGAACCAAGGAGTCCCTTAGATATGATGCAAAATGGATCTTGTCTATCCTT---  
GATCAGAGATTTCTCTATGAAAAATATGAATCGGAGTTTGAAGAA-----  
GGGGAAGTAGAAGGAATCCTC-----GACCCG---CAACAGATAGAGGAGGAT-----TTATTC---  
AATCACATAGTTTGGGCTCCTAGAATATGGAGCCCT---TGGGGCTTTCTA-----  
TTTGATTGTATCGAAAGGCCCAATTCA-----TTGGGATTTCCCTATTGG-----

-----  
GCCAGGTCATTTCCGGGGTAAGCGGATCATTATGATGAA-----  
GAGGATGAGCTTCAAGAGAATGATTTCGGAGTTCTTGCAGAGTGGAAACC---ATG---CAGTACCAGATACGAGATAGA--  
---TCTTCCAAAGAA-----CAAGGCGTT-----TTTCGAATAAGCCAATTCATTTGGGACCCT-----  
GCAGATCCA---CTCTTTTTTCTATTCT---AAAGACCAGCCCTTGTCTCT-----GTGTTTTCA-----CAT---  
CGAGAATTTCTTT-----GCAGATGAAGAGATGTCAAAG--  
-GGGCTTCTT-----ACTTCCCAAACA-----GATCCTCTACATCTATATATAAACGCTGGTTTTATC-----

AAGAATACGCAAGAAAAG-----CACTTCGAATTGTTGATTTCATCGCCAGAGATGGCTT-----AGAACC-----  
AAGAGTTTCATTATCTAAT-----GGATTTTTCCGTTCTAATACT-----  
CTATCCGAGAGTTATCAGTATTTATCAAATCTGTTCTATCT---  
AACGGAAGGCTATTGGATCAAATGACAAAGGCATTGTTGAGAAAAAGATGGCTTTTCCCGGATGAAATGAAAATTGGATT  
CATGTAA-----ATGCCTAGATCC-

CGGATAACTGGAAATTTGATTGATAAGACCTTTTCAATTGTAGCCAATATCTTATTACGAATAATTCCGACAACCTTCAGG  
AGAAAAAGAGGCATTTACTTATTACAGAGATGGT-----ATGTCTGCTCAATCCGAAGGAAATTATGCG---  
GAAGCTTTACAGAATTATTATGAAGCTATGCGACTAGAAAATCGATCCCTATGATAGAAGTTATATACTCTATAATATAGG  
CCTTATTACACAAGTAATGGAGAACACACAAAAGCTTTGGAATATTATTTTCGGGCATTAGAACGAAACCCTTTCTTAC  
CACAAGCTTTTAATAATATGGCCGTAATCTGTCTATTACCGAGGAGAACAGGCCATTTCGGCAGGGAGATTCTGAAATTGCG  
GAGGCTTGGTTTCGACCAAGCCGCGGAGTATTGGAACAAGCTATAGCGCTTACTCCTGGAATTTATATTGAAGCGCAGAA  
TTGGTTGAAGATCACAAAGCCGTTTC---GAA-----

-----ATGAGTTGGCGATCAGAACAT-----  
ATATGGATAGAACTTATAGCGGGTCTCGAAAAATAAGTAATTTCTGCTGGGCCATTATACTTTTTTTTAGGTTTATTGGG  
GTTTTTATTGATTGGAATTTCCAGTTATCTTGACAGAAATTTGATATCTTTATTCCCG---TCTCAG-----  
CAAATCCTTTTTTTTCCACAAGGGATCGTGATGTCTTTCTATGGGCTCGCCGGTCTGTTTATTAGCTCTTATTTGTGGTG  
CACAATTTTCGTGGAATGTAGGTAGTGGTTATGATCGATTTCGATAGAAAAGAAGGAATAGTGTGTATTTTTCGTTGGGGAT  
TTCCAGGAAAAAATCGTCGCATCTTACTACGACTCTTTATGAAAGATATTCAGTCTATCAGAATAGAAGTTAAA-----  
-----GAGGTTTTTTATGCTCGGCGT-----GTCCTTTATATGGAATCAGAGGC-----  
CAGGGGGCCATTCTTTGACTCGTACTGATGAGAAT-----TTG---  
ACTCCACGAGAAATTGAGCAAAAAGCAGCGGAATTGGCCTATTTTTTGCCTGTACCA---ATTGAA---GTATTT-----

Ranunculus

-----GATGATGACCTTGAT-----ACG-----  
GAGCTGCTAACTATGACGAATGCGCTAACT-----ATGTATATCACGCCGAAA-----

ATAGACCGATTTGATATTACCCTTCCATTTCGAATTAGCAAAAGCGATGTCTCCTTGCATAATATGGATTCCAAACATTCA  
TGATCTGTATGTGAATGAGTCGAAT-----  
TACTTATCCCTCGGTCTATTAGTGAACCATCTCTCC-----AGGGATTGTGAAAGATGC---TCCACTCGAAAT---  
ATTCTTGTTATTGCTTCGACTCATATTTCCCAAAAAGTGGATCCTGCTCTAATAGCTCCGAATAAATCAAATACATGCAT  
TAAGATACGAAGGCTTCTTATTCCACAACAACGAAAGCACTTTTTCACTCTTTCTATACTAGGGGATTTTAC-----  
TTGAAAAGAAAATGTTCCATACT-----  
AATGGATTTCGGTCCATAACCATGGGTTCCAATGCACGAGATCTTGTAGCACTTACCAATGAGGCCCTATCAATTAGTAT  
TACACAGAAGAAATCCATTATAGACACTAATAACAATTAGATCCGCTCTTCATAAACAAACTTGGGATTTGCGATCC-----

CAGGTACGATCGGTTCAGGATCATGGGATCCTTTTTCTATCAGATAGGAAGGGCTATTGCACAAAATGTACTTCTAAGCAA  
TTGCCCC-----ATAGATCCTATATCTATCTATATGAAGAAGAAATCG-----TGTAAG---  
GAAGGGGATTCTTATTTGTACAAATGGTACTTTCGAGCTT-----  
GGAACGAGCATGAAGAAATTAACGATCCTTCTTTATCTTTTGTGTTCTGCCGGATCGGTCGCTCAAGATCTTTGGTC  
TCCACCCGGACCCGATGAAAAAACGGGATCACTTCTTATGGATTTCGTTGAGAAT-----  
GATTCTGATCTAGTTCATGGC-----CTATTA-----GAAGTA-----  
GAAGGCGTT-----CTGGTGGGA-----TCCTCACCGACA-----

-----GAAAAAGATTGCAGTCAGTTTTATAAGGATCGAGTG-----  
ACATTGCTTCTTCGGTCCGAACCAAGGAATCCTTTTCGATATGATGCAAAATGGATCTTATTCTATCGTT---  
GATCAGAGATTTCTATATGAAAAATACGAATTGGAGTTTGAAGAA-----  
GGGGGAGGAGAAGGAGCCCTC-----GACCCG---CAACAGCTCGAGGAGGAT-----TTATTC---  
AATCACATAGTTTGGGCTCCTAGAATATGGCACCCCT---TGTGGCAATCTA-----  
TTTGATTGTATCGAAAGGCCCAATGAA-----TTGGGATTTCCCTATTGG-----

-----  
-----  
-----  
-----  
GCCAGGTCATTTCCGGGGCAAGCGGATCATTTATCATAAA-----  
GAGGATGAGCTTGAAGAGAATGATTCCGGAGTTCTTGCAGAGTGGAAACC---ATG---CAGTACCAGACACGAGATAGA--  
----TCTTCCAAAGAA-----CAAGGCTTT-----TTTCGAATAAGCCAATTCATTTGGGACCCT-----  
GCAGATCCA---TTCCTTTTTCCTATTC---AAAGATCAGCCCTTTGTCTCT-----GTGTTTTCA-----CGT---  
CGAGAATTCTTT-----GCAGATCAAGAGATGCCAAAA--  
-GGGCTTCTT-----ACTTCCCAAACA-----AATTCTCCTACATCTATATATAAACGCTGGTTTCATC-----  
AAGAATACGCAAGAAAAG-----CACTTCGAATTGTTGATTTCATCGCCAGAGATGGCTT-----AGAACC-----  
AATAGTTTCATTATCTAAT-----GGATCTTTCCGTTCTAATACT-----  
CTATCCGAGAGTTTATCAGTATTTTATCAAATCTGTTCCCTATCT---  
AATGGAACGTTTATTGGATCAAATGACAAAAGACATTGTTAAGAAAAGAGATGGCTTTTCCCGGATGAAATGAAACATTTGAT  
TCATGTAACAGGAGAAAAGATTTCCCATTCTTAG-----ATGCCTAGATCG-  
--

CGGATAAATGGAAATTTTTATTGATAAGACCTTTTCAATTGTAGCCAATATCTTATTACGAATAAATCCGACAACCTCAGG  
AGAAAAAGAGGCATTTACCTATTACAGAGATGGTGCGATT---ATGTCAGCTCAATCCGAAGGAAATTTATGCA---  
GAAGCTTTACAAAATTATTATGAAGCTACGCGACTAGAAATTGATCCCTATGATCGAAGTTATATACTCTATAACATAGG  
CCTTATCCACACAAGCAATGGAGAACATACGAAAGCCTTGGAAATATTATTTCCGGGCACTAGAACGAAACCCATTCTTAC  
CACAAGCTTTTTAATAATATGGCCGTGATTTGTCATTACCAGGAGGAAACAGGCCATTGACAGGGGAGATTCCGAAATTGCG  
GAGGCTTGGTCCGATCAAGCTGCTGAGTATTGGAACAAGCTATAGCGCTTACTCCCGGTAATTATATTGAAGCGCATAA  
TTGTTTGAAGATTACGAGGCGGTTT---GAA-----  
-----ATGAACTGGCGATCAGAACGT-----  
GTGTGGATAGAACTTATAACAGGGTCTCGAAAAGCAAGTAATTTCTTTTGGGCCTGTATCCTTTTTTTAGGTTCAACGGG  
ATTCTTATTAGTTGGAACCTCTAGTTACCTTGGCAGGAATTTGATATCTTTATTTTCT---TCTCAG-----  
CAAATCCTTTTTTTTCCACAAGGGATCGTGATGTCTTTTTATGGAATCGCGGGTCTGTTTATTAGTCTCTATTTGTGGTG  
CACAATTTTCGTGGAATGTAGGTAGTGGTTATGATAGATTGATAGAAAAAAGGGAATAGTTTGTATTTTTCTGTTGGGGAT  
TTCTTGGAAAGAAATCGTCGCATCTTTCTTCGATTCTTATGAGGGATATTCCAGTCGATTAGAATAGAGGTTAAA-----  
-----GAGGGTATTTATCCTCGGCGT-----ATACTTTATATGGAATCAGAGGC-----  
CAGGGTGCTGTTCCCTTAACTCGTACTGATCAGAAT-----TTG---  
ACTCCACGAGAAAATTGAACAAAAGGCTGCGGAATTGGCCTACTTTTTGCGCGTGCCC---ATTGAG---GTATTT-----  
-----

Spinacia -----  
-----

-----GATCGTGACCTTGAT-----  
ACGGAGCTGGAGCTGCTAACTATGATGAATGCGCTAACT-----ATGGATATGATGCCGGAA-----  
-----  
ATAGACCAATTTTCTATCACCCTTCAATTCGAATTAGCAAAAGCAATGTCTCTTGCATAATATGGATTCCAAACATTCA  
TGATCTGGATGTGAATGAGTCGAAT-----  
TACTTATCCCTCGGTCTATTTCGTGAATCTCTCC-----AGGGATTGTGAAAGAGGG---TCTACTAGAAAT---  
ATTCTTGTATTGGCTTCGACTCATATTCCTCAAAAAGTGGATCCCCTCTAATAGCTCCGAATCAATTAATACATGCAT  
TAAGATACGAAGGCTTTCGTATTCCACAACAACGAAAGCACTTTTTCACTCTTTATATACTAGGGGATTTTAC-----  
TTGAAAAGAAAATGTTCCATACT-----  
AATGGATTCGGGTCCATAACCATGGGTTCCAATGTACGAGATCTTGTAGCATTTATCAACGAGGCCCTATCGATTAGTAT  
TACACAGAAGAAATCCATTATAGACACTAATAACAATTCGATCCGCTCTTCATAGACAAACTTGGGATTTGCGATCC----  
-----  
CAGGTAAGATCGGTTGAGGATCATGGGATCCTTTTTCTATCAGATAGGAAGGGCTGTTGCACAAAATGTACTTCTAAGTAA  
TTGCCCG-----ATAGATCCTATATCTACCTATATGAAGAAGAAATCA-----TGTAAC---  
GAAGGGGATTCTTATTTGTACAAATGGTACTTCGAACCT-----  
GGAACGAGCATGAAGAAATTAACGATACTTCTTTATCTTTTGTAGTTGTTCTGCCGGATCGGTCGCTCAAGATCTTTGGTC  
TCTACCCGGACCCGATGAAAAAAGCGGATCACTTCTTATGGACTCGTTGAGAAT-----  
GATTCTTATCTAGTTTCATGGC-----CTATTA-----GAAGTA-----  
GAAGGCGCT-----CTGGTGGGA-----TCCTCACGGATA-----  
-----  
-----



-----ATGCCTAGATCC-----  
CGTGTAATGGAAATTCATTGATAAGACCTCCTCAATTGTAGCCAATATTTTATTGCGAATAATTCCGACAACCTCAGG  
AGAAAAAAGGCATTTACTTATTATAGAGATGGG-----ATGTTGGCTCAATCCGAAGGAAATTATGCG----  
GAAGCTTTGCAAAATTATTATGAAGCTACGCGACTAGAAATCGATCCCTATGATCGAAGTTATATACTCTATAACATAGG  
CCTTATACACACAAGCAATGGAGAGCATACAAAGGCTTTGGAATATTATTTCCGGGCACTAGAACGAAACCCCTTCTTAC  
CGCAAGCTTTTTAATAATATGGCCGTGATCTGTCATTACCGAGGAGAACAGGCCATTCTACAGGGTGATTCGGAAATTGCG  
GAAGCTTGGTTTGATCAAGCTGCTGAATATTGAAACAAGCTATAGCGCTTACTCCGGGAAATTATATTGAAGCACAGAA  
CTGGTTGAAGATTACGAAGCGCTTT---GAATTTGAA-----  
-----ATGAATTGGCGATCAGAACAC-----  
ATATGGGTAGAACTTCTAAAAGGTTCTCGAAAAAGGGTAATTTTTTTCTGGGCCTGTATTCTTTTTCTAGGTTCACTAGG  
ATTCTTATCGGTTGGGATTTCCAGTTATCTTGGTAAGAATATTATATCTATACTTCCA---TCTCAA-----  
GAAATTTCTTTTTTTCCGCGAGGGGTCGTGATGTCTTTCTACGGAATCGCAGGCCTATTATTAGCTCCTACTTTGTGGTG  
TACTATTTTGTGGAATGTAGGTAGTGGTTATGACCGATTTCGATAGAAAAGAGGGAATAGTGTGCATTTTTCTGGTTGGGGAT  
TCCCTGGAATAAAAACGTCGCGTCTTCCTTCGATTTCCTTATGCGGGATATCCAATCAATTAGAATTCAGGTTAAA-----  
-----GAGGGTCTTTATCCTCGTCGT-----ATTCTTTATATGGAAATCCGGGGC-----  
CAGGGGATCATTCCCTTGACTCGTACTGATGATAAA-----  
TTTTTTACTCCACGAGAAATTGAACAAAAGCTGCCGAATTGGCCTATTTCTTGCGCGTACCA---ATTGAA---  
GTATTT-----  
Typha -----



TAAGATACGAAGGCTTCTTATTCCACAACAACGAAAGCACTTTTTCACTCTTTCATATACTAGGGGATTTTCAC-----  
TTGGAAAAGAAAATGTTCCATACT-----  
AATGGATTTCGGGTCATAACCATGGGTTCCAATGCACGAGATCTTGTAGCACTTACCAATGAGGCCCTATCGATTAGTAT  
TACACAGAAGAAATCAATTATAGACACTAATGCAATTAGATCCGCTCTTCATAGACAAACTTGGGATTTGCGATCC-----  
-----  
CAGGTAAGATCGGTTTCAGGATCATGGGATCCTTTTTCTATCAGATAGGAAGGGCTGTTGCGCAAAATGTACTTCTAAGTAA  
TTGCCCC-----ATAGATCCTATATCTATCTATATGAAGAAGAAATCA-----TGTAAC---  
GAAGGGGATTCTTATTTGTACAAATGGTACTTTCGAACTT-----  
GGAACGAGCATGAAGAAATTAACGATACTTCTTTATCTTTTGTAGTTGTTCTGCCGGATCGGTCGCTCAAGACCTTTGGTC  
TCTACCCGGACCCGATGAAAAAAATGGGATCACTTCTTATGGACTCGTTGAGAAT-----  
GATTCTGATCTAGTTCCACGGC-----CTATTA-----GAAGTA-----  
GAAGGCGCT-----CTGGTGGGA-----TCCTCACGGACA-----  
-----  
-----  
-----GAAAAAGATTGCAGTCAGTTTGATAATGATCGAGTG-----  
ACATTGCTTCTTCGGCCCGAACCAAGGAATCCCTTAGATATGATGCAAAATGGATCTTGTCTATCGTT---  
GATCAGAGATTTCTCTATGAAAAATACGAATCGGAGTTTGAAGAA-----  
GGGGCAGGAGAAGGAGCCCTC-----GACCCG---CAACAGATAGAGGAGGAT-----TTATTC---  
AATCACATAGTTTGGGCTCCTAGAATATGGCGCCCT---TGGGGCTTTCTA-----  
TTTgATTGTATCGAAAGGACCAATGAA-----TTGGGATTTCCCTATTGG-----  
-----  
-----  
-----  
GCCAGGTCTTTTCGGGGCAAGCGGATCATTATGATGAA-----  
GAGGATGAGCTTCAAGAGAATGATTTCGGAGTTCTTGCAGAGTGGAAACC---ATG---CAGTACCAGACACGAGATAGA--  
----TCTTCCAAAGAA-----CAAGGCTTT-----TTTGAATAAGCCAATTCATTTGGGACCCT-----  
GCAGATCCA---CTCTTTTTCTTATTC---AAAGATCAGCCCTTTGTCTCT-----GTGTTTTCA-----CAT---  
CGAGAATTCTTT-----GCAGATGAAGAGATGTCAAAG--  
-GGGCTTCTT-----ACTTCCCAAACA-----GATCCTCCTACATCTATATATAAACGCTGGTTTATC-----  
AAGAATACGCAAGAAAAG-----CACTTCGAATTGTTGATTTCATCGCCAGAGATGGCTT-----AGAACC-----  
AATAGTTCATTATCTAAT-----GGATCTTTCCGTTCTAATACT-----  
CCATCCGAGAGTTATCAGTATTTATCAAATCTGTTCCCTATCT---  
AACGCAAGGCTATTGGATCAAATGACAAAGACATTGTTGAGAAAAAGATGGCTTTTCCCGGATGAAATGAAAATTGGATT  
CATGTAA-----ATGCCTAGATCG-  
--  
CGGATAAATGGAAATTTTATTGATAAGACCTTTTTCAATTGTAGCCAATATCTTATTACGAATAATTCCAACAACCTTCAGG  
AGAAAAGAGGCATTTACCTATTACAGAGATGGT-----ATGTCGGCTCAATCCGAAGGAAATTTATGCG---  
GAAGCTTTACAGAATTATTATGAAGCTATGCGACTAGAAATTGATCCCTATGATCGAAGTTATATACTCTATAACATAGG  
ACTTATCCACACAAGTAATGGAGAGCATACGAAAGCTTTGGAATATTATTTTCGGGCATTAGAACGAAACCCGTTCTTAC  
CACAAGCTTTTAATAATATGGCCGTGATCTGTCATTACCGGGGAGAAACAAGCCATTGCCAGGGGAGATTCTGAAATTGCG  
GAAGCTTGGTTCGATCAAGCCGCTGAGTATTGGAAACAAGCTATAGCACTTACTCCTGGTAATTATATTGAAGCGCATAA  
TTGGTTGAAGATCACGAGGCGTTTC---GAA-----  
-----ATGAGTTGGCGATCAGAACGT-----  
ATATGGATAGAACTTATAACGGGGTCTCGAAAACAAGTAATTTCTGCTGGGCCTTTATCTTTTTTTAGGTTTCATTAGG  
GTTCTTATTGGTTGGAACCTCCAGTTATCTTGGTAGGAATTTGATATCTTTATTTCG---TCTCAG-----  
CAAATAATTTTTTTCCACAAGGGATCGTGATGTCTTTCTACGGGATGCGCGTCTCTTTATTAGCTCCTATTTGTGGTG  
CACAATTTCTGTTGAATGTAGGTAGTGGTTATGATCGATTGATAGAAAAGGAATAGTGTGTATTTTTCGTTGGGGAT  
TTCCTGGA AAAAATCGCCGGATCTTCTCCGATTACTTATGAAAGATATTCACTCCATCAGAATAGCAGTTAAA-----  
-----GAGGATATTTATGCCCGTCGTATCCTTGTCTTTTATATGGAAATCAGAGGA-----  
CAGGGGGCCATTCTTTGACTCGTACTGATGAGAAT-----TTG---  
ACGCCACGAGAAATGGAACAAAAGCTGCTGAATTAGCCTATTTCTTGCCTGTACCG---ATTGAA---GATTT-----  
-----



Yucca

-----ATGCCTAGATCT-----  
CGGATAAATGGAAATTTTATTGATAAGACCTCTTCAATTATAGCCAATATTTTATTACGAATAATTCCGACAACCTTCAGG  
AGAAAAAAGGCATTTACCTATTACAGAGATGGTGTGATT--ATGTCGGCTCAATCCGAAGGAAATTATGCG---  
GAAGCTTTACAGAATTATTATGAAGCTACGCGACCAGAAATTGATCCCTATGATCGAAGTTATATACTCTATAACATAGG  
CCTTATACACACAAGCAACGGAGAGCATACAAAAGGCTTTGGAATATTATTTCCGGGCACTAGAACGAAACCCATTCTTAC  
CACAAGCTTTTAATAATATGGCTGTGATCTGTCTATTACCGGGGAGAACAGGCCATTCTACAAGGCGATTCTGAAATTGCG  
GAGGCTTGGTCCGATCAAGCCGCTGAGTATTGGAAACAAGCTATAGCGCTTACTCCAGGTAATTATATTGAAGCACATAA  
TTGGTTGAAGATCACGAGGCGTTTC---GAA-----  
-----ATGAACTGGCGATCAGAACAT-----  
ATATGGATAGAACTTATAACAGGGTCTCGAAAAGCAAGTAATTTTTGCTGGGCCTGTATCCTTTTTTTTAGGTTTCATTAGG  
ATTCTTAGTGGTTGGAACCTCCAGTTATCTTGGTAGGAATCTGATACCCGGATTTCCA---TCTCAG-----  
CAAATCGTTTTTTTTCCACAAGGGATCGTGATGTCTTTCTATGGGATCGCGGGTCTATTTCATTAGTTCCCTATTTGTGGTG  
CACAATTTTCATGGAATGTCGGTAGTGGTTATGACCGATTTGATAGAAAAGAAGGAATAATGTGTATTTTTTCGTTGGGGAT  
TCCCCGGAATAAATCGTCGCATCTTCCCTTCGTTTCTTTATGAAGGATATCCAATCAATCAGAATGGAGGTTAAA-----  
-----GAGGGTCTTTTTCTCGTCGT-----ATTCTTTATATGAAATCAGAGGC-----

CAAGGAACCATTCCCTTGACTCGTACTGATGAGAAT-----TTG---  
ACTCCACGAGAAATTGAGCAAAAAGCGGCGGAATTGGCCTGTTTCTTGCGCGTACCA---ATTGAA---GTCTTT-----

Zea

-----ATGCCTAGATCC---  
CGTATAAATGGAAATTTCAATTGATAAGACCTCCTCGATTGTAGCCAATATTTTTATTGCAAATAATTCCGACAACCTCCGG  
GGAAAAAAGGGCATTACTTATTATAGAGATGGG-----ATGTTGGCTCAATCCGAAGGAAATTATGCG---  
GAAGCTTTGCAGAATTATTATGAAGCTACGCGACTAGAAATTGATCCCTATGATCGAAGTTATATACTATATAACATAGG  
CCTTATACACACAAGCAATGGAGAGCATACAAAGGCTTTGGAATATTATTTCCGGGCGCTAGAACGAAACCCCTTCTTAC  
CGCAAGCTTTTAATAATATGGCCGTGATCTGTCATTACCGAGGAGAACAGGCCATTCTACAGGGCGATTTCGGAAATTGCG  
GAAGCTTGGTTTGATCAAGCTGCTGAGTATTGGAAACAAGCTATAGCGCTTACTCCAGGAAATTATATTGAAGCACAGAA  
CTGGTTAAAGATTACGAAGCGCTTT---GAATTTGAA---  
-----ATGAATTGGCGATCAGAACAC-----  
ATATGGATAGAACTTCTAAAAGGTTCTCGAAAAAGAGGTAATTTTTCTGGGCCTGTATTCTTTTTCTAGGTTTCATTAGG  
ATTCTTAGCGGTTGGGGCTTCCAGTTATCTTGGTAAGAATATGATATCTGTACTTCCA---TCTCAA-----  
CAAATCTTTTTTTTCCACAGGGGTCGTGATGTCTTTCTACGGAATCGCGGCCTATTATTAGCTCCTATTTGTGGTG

```
CACTATTTTATGGAATGTAGGCAGTGGTTATGACCGATTTCGATAGAAAAGAGGGAATAGTGTGCATTTTTTCGTTGGGGAT
TCCCTGGAATAAAAACGTCGCATCTTCCTTCAATTCCTTGTGCGGGATATCCAATCAATTAGAATTCAGGTTAAA-----
-----GAGGGTCTTTATCCTCGTCGT-----ATCCTTTATATGAAATCCGGGGC-----
CAGGGGGTCATTCCCTTGACTCGTACTGATGAGAAG-----
TTTTTTACTCCACGAGAAATTGAACAAAAGCTGCCGAATTGGCCTATTTCTTGCGTGTACCA---ATTGAA---
GTATTT-----
```

```
;  
End;
```

```
BEGIN PAUP;
```

```
OUTGROUP Pinus Ginkgo;
```

```
CHARSET accD = 1 - 2667 ;  
CHARSET atpA = 2668 - 4209 ;  
CHARSET atpB = 4210 - 5721 ;  
CHARSET atpE = 5722 - 6171 ;  
CHARSET atpF = 6172 - 6768 ;  
CHARSET atpH = 6769 - 7014 ;  
CHARSET atpI = 7015 - 7779 ;  
CHARSET ccsA = 7780 - 8889 ;  
CHARSET cemA = 8890 - 9747 ;  
CHARSET clpP = 9748 - 10503 ;  
CHARSET infA = 10504 - 10878 ;  
CHARSET matK = 10879 - 12870 ;  
CHARSET ndhA = 12871 - 14016 ;  
CHARSET ndhB = 14017 - 15675 ;  
CHARSET ndhC = 15676 - 16044 ;  
CHARSET ndhD = 16045 - 17685 ;  
CHARSET ndhE = 17686 - 18009 ;  
CHARSET ndhF = 18010 - 20466 ;  
CHARSET ndhG = 20467 - 21084 ;  
CHARSET ndhH = 21085 - 22302 ;  
CHARSET ndhI = 22303 - 22869 ;  
CHARSET ndhJ = 22870 - 23394 ;  
CHARSET ndhK = 23395 - 24453 ;  
CHARSET petA = 24454 - 25470 ;  
CHARSET petB = 25471 - 26118 ;  
CHARSET petD = 26119 - 26649 ;  
CHARSET petG = 26650 - 26766 ;  
CHARSET petL = 26767 - 27021 ;  
CHARSET petN = 27022 - 27120 ;  
CHARSET psaA = 27121 - 29412 ;  
CHARSET psaB = 29413 - 31620 ;  
CHARSET psaC = 31621 - 31866 ;  
CHARSET psaI = 31867 - 31980 ;  
CHARSET psaJ = 31981 - 32118 ;  
CHARSET psbA = 32119 - 33183 ;  
CHARSET psbB = 33184 - 34719 ;  
CHARSET psbC = 34720 - 36153 ;  
CHARSET psbD = 36154 - 37239 ;  
CHARSET psbE = 37240 - 37491 ;  
CHARSET psbF = 37492 - 37611 ;  
CHARSET psbH = 37612 - 37866 ;  
CHARSET psbI = 37867 - 38034 ;  
CHARSET psbJ = 38035 - 38157 ;
```

CHARSET psbK = 38158 - 38370 ;  
 CHARSET psbL = 38371 - 38493 ;  
 CHARSET psbM = 38494 - 38619 ;  
 CHARSET psbN = 38620 - 38754 ;  
 CHARSET psbT = 38755 - 38871 ;  
 CHARSET psbZ = 38872 - 39060 ;  
 CHARSET rbcL = 39061 - 40536 ;  
 CHARSET rpl2 = 40537 - 41454 ;  
 CHARSET rpl14 = 41455 - 41829 ;  
 CHARSET rpl16 = 41830 - 42273 ;  
 CHARSET rpl20 = 42274 - 42711 ;  
 CHARSET rpl22 = 42712 - 43398 ;  
 CHARSET rpl23 = 43399 - 43707 ;  
 CHARSET rpl32 = 43708 - 44007 ;  
 CHARSET rpl33 = 44008 - 44238 ;  
 CHARSET rpl36 = 44239 - 44355 ;  
 CHARSET rpoA = 44356 - 45513 ;  
 CHARSET rpoB = 45514 - 49014 ;  
 CHARSET rpoC1 = 49015 - 51381 ;  
 CHARSET rpoC2 = 51382 - 58080 ;  
 CHARSET rps2 = 58081 - 58857 ;  
 CHARSET rps3 = 58858 - 59655 ;  
 CHARSET rps4 = 59656 - 60378 ;  
 CHARSET rps7 = 60379 - 60867 ;  
 CHARSET rps8 = 60868 - 61308 ;  
 CHARSET rps11 = 61309 - 61758 ;  
 CHARSET rps12 = 61759 - 62238 ;  
 CHARSET rps14 = 62239 - 62565 ;  
 CHARSET rps15 = 62566 - 62928 ;  
 CHARSET rps16 = 62929 - 63264 ;  
 CHARSET rps18 = 63265 - 64215 ;  
 CHARSET rps19 = 64216 - 64605 ;  
 CHARSET ycf1 = 64606 - 72720 ;  
 CHARSET ycf2 = 72721 - 83376 ;  
 CHARSET ycf3 = 83377 - 83943 ;  
 CHARSET ycf4 = 83944 - 84621 ;

CHARSET 6lgenes = atpA atpB atpE atpF atpH atpI petA petB petD petG petL petN  
 psaA psaB psaC psaI psaJ psbA psbB psbC psbD psbE psbF psbH psbI psbJ psbK psbL  
 psbM psbN psbT psbZ rpoA rpoB rpoC1 rpoC2 ccsA cemA clpP matK rbcL ycf3 ycf4  
 rpl2 rpl14 rpl16 rpl20 rpl32 rpl33 rpl36 rps2 rps3 rps4 rps7 rps8 rps11 rps12  
 rps14 rps15 rps18 rps19;  
 CHARSET fastgenes = matK rpl32 ccsA rps15 rps3 rpl33 cemA rpoC2 rps19 rps8 rpoA  
 clpP rpl20 rps11 ycf4 atpF psaJ atpE psbH rps2 psbK rpl16 rps4 rpoC1 psaI petL  
 rpl14 rpoB rps18 petA rpl36 rps14;  
 CHARSET slowgenes = atpA atpI atpB psbT rbcL psaC psbJ psbM psbI psbB petD petB  
 psbZ atpH psbC ycf3 psaA psaB petG psbN psbE psbA psbD rpl2 psbF petN psbL rps12  
 rps7;

[EXCLUDED CHARACTERS]

CHARSET exchars =

[accD]

1 - 480  
 490 - 495  
 520 - 525

|     |   |      |
|-----|---|------|
| 574 | - | 576  |
| 583 | - | 585  |
| 601 | - | 627  |
| 685 | - | 687  |
| 694 | - | 699  |
| 718 | - | 720  |
| 799 | - | 804  |
| 871 | - | 993  |
| 997 | - | 1002 |

|      |   |      |
|------|---|------|
| 1030 | - | 1035 |
| 1057 | - | 1110 |
| 1123 | - | 1134 |
| 1144 | - | 1167 |
| 1183 | - | 1185 |
| 1204 | - | 1212 |
| 1222 | - | 1227 |
| 1255 | - | 1260 |
| 1285 | - | 1290 |
| 1312 | - | 1314 |
| 1345 | - | 1353 |
| 1363 | - | 1437 |
| 1459 | - | 1464 |
| 1471 | - | 1473 |
| 1477 | - | 1479 |
| 1489 | - | 1524 |
| 1546 | - | 1551 |
| 1561 | - | 1575 |
| 1588 | - | 1590 |
| 1609 | - | 1626 |
| 1636 | - | 1641 |
| 1651 | - | 1653 |
| 1687 | - | 1692 |
| 1711 | - | 1716 |
| 1753 | - | 1758 |
| 1837 | - | 1851 |
| 1879 | - | 1881 |
| 1888 | - | 1926 |
| 1942 | - | 2031 |
| 2323 | - | 2328 |
| 2614 | - | 2667 |

[atpA]

|      |   |      |
|------|---|------|
| 2677 | - | 2682 |
| 4180 | - | 4182 |
| 4198 | - | 4209 |

[atpB]

|      |   |      |
|------|---|------|
| 4243 | - | 4248 |
| 5689 | - | 5694 |
| 5701 | - | 5703 |
| 5719 | - | 5721 |

[atpE]

|      |   |      |
|------|---|------|
| 5722 |   |      |
| 5878 | - | 5880 |
| 5884 | - | 5892 |
| 6133 | - | 6171 |

[atpF]

6202 - 6204  
6208 - 6210  
6244 - 6246  
6325 - 6342  
6679 - 6684  
6745 - 6750  
6757 - 6759  
6766 - 6768

[atpH]

7012 - 7014

[atpI]

7027 - 7032  
7054 - 7056  
7060 - 7062  
7069 - 7071  
7204 - 7206  
7777 - 7779

[ccsA]

7780 - 7782  
7867 - 7881  
7885 - 7890  
8068 - 8082  
8089 - 8091  
8317 - 8379  
8431 - 8445  
8452 - 8457  
8461 - 8469  
8479 - 8490  
8497 - 8505  
8722 - 8745  
8764 - 8769  
8872 - 8889

[cemA]

8890 - 8985  
8989 - 8991  
9001 - 9015  
9037 - 9042  
9064 - 9072  
9100 - 9105  
9232 - 9249  
9268 - 9270  
9610 - 9615  
9739 - 9747

[clpP]

9787 - 9879  
9892 - 9909  
9928 - 9930  
9958 - 9960  
10117 - 10119  
10228 - 10230

10264 - 10266  
10384 - 10386  
10462 - 10503

[infA]

10507 - 10509  
10516 - 10521  
10528 - 10563  
10597 - 10599  
10612 - 10617  
10675 - 10680  
10714 - 10719  
10786 - 10839  
10858 - 10878

[matK]

10879 - 10971  
11002 - 11007  
11017 - 11022  
11050 - 11055  
11113 - 11145  
11170 - 11172  
11182 - 11190  
11245 - 11250  
11281 - 11286  
11317 - 11322  
11422 - 11451  
11473 - 11478  
11488 - 11496  
11686 - 11688  
11695 - 11703  
11725 - 11727  
11734 - 11745  
11755 - 11757  
11839 - 11841  
11908 - 11967  
11983 - 11988  
12163 - 12168  
12202 - 12207  
12460 - 12462  
12553 - 12555  
12568 - 12576  
12622 - 12627  
12658 - 12672  
12691 - 12696  
12703 - 12708  
12748 - 12753  
12769 - 12870

[ndhA]

12883 - 12888  
12901 - 12903  
12907 - 12909  
12913 - 12918  
12949 - 12954  
13426 - 13428  
13744 - 13746

13780 - 13794  
14005 - 14016

[ndhB]

14017 - 14061  
14218 - 14223  
15412 - 15420  
15445 - 15453  
15499 - 15510  
15517 - 15522  
15526 - 15531  
15640 - 15675

[ndhC]

15727 - 15732  
16042 - 16044

[ndhD]

16045 - 16092  
16105 - 16110  
16174 - 16179  
16195 - 16200  
16276 - 16287  
16339 - 16341  
16570 - 16572  
17155 - 17160  
17239 - 17253  
17464 - 17472  
17494 - 17499  
17518 - 17520  
17527 - 17532  
17662 - 17685

[ndhE]

17695 - 17712  
18007 - 18009

[ndhF]

18661 - 18672  
18679 - 18684  
19489 - 19494  
19501 - 19506  
19513 - 19521  
19531 - 19539  
19552 - 19557  
19573 - 19584  
19594 - 19599  
19603 - 19605  
19609 - 19611  
19636 - 19638  
19645 - 19665  
19687 - 19692  
19702 - 19704  
19708 - 19716  
19825 - 19827  
19834 - 19848  
19903 - 19908



19936 - 19941  
19954 - 19959  
20020 - 20022  
20089 - 20094  
20110 - 20112  
20116 - 20121  
20353 - 20466

[ndhG]

20467 - 20475  
20605 - 20607  
20623 - 20625  
20758 - 20763  
21016 - 21084

[ndhH]

21085 - 21105  
21112 - 21117  
22000 - 22005  
22012 - 22014  
22300 - 22302

[ndhI]

22777 - 22869

[ndhJ]

22870 - 22911  
23149 - 23151  
23392 - 23394

[ndhK]

23395 - 23512  
23530 - 23562  
23593 - 23595  
23641 - 23652  
23962 - 23964  
24091 - 24093  
24106 - 24114  
24124 - 24129  
24145 - 24150  
24172 - 24186  
24235 - 24306  
24316 - 24321  
24334 - 24336  
24343 - 24348  
24355 - 24360  
24376 - 24378  
24394 - 24399  
24415 - 24453

[petA]

24508 - 24528  
24547 - 24552  
24565 - 24567  
24850 - 24852  
24889 - 24891  
24901 - 24903

24913 - 24915  
25162 - 25164  
25417 - 25419  
25459 - 25461  
25468 - 25470

[petB]  
26116 - 26118

[petD]  
26599 - 26649

[petG]  
26761 - 26766

[petL]  
26767 - 26805  
26821 - 26826  
26896 - 26904  
26914 - 27021

[petN]  
27022 - 27030  
27118 - 27120

[psaA]  
27145 - 27168  
27178 - 27186  
28588 - 28590  
29215 - 29217  
29410 - 29412

[psaB]  
30019 - 30021  
31618 - 31620

[psaC]  
31864 - 31866

[psaI]  
31882 - 31884  
31978 - 31980

[psaJ]  
32008 - 32010  
32110 - 32118

[psbA]  
33148 - 33150  
33181 - 33183

[psbB]  
34675 - 34677  
34708 - 34710  
34714 - 34719

[psbC]

34720 - 34769  
35299 - 35301  
35309 - 35311  
35452 - 35454  
35884 - 35886  
36151 - 36153

[psbD]  
36154 - 36171  
36208 - 36213  
37237 - 37239

[psbE]  
37489 - 37491

[psbF]  
37609 - 37611

[psbH]  
37612 - 37629  
37657 - 37659  
37663 - 37665  
37675 - 37680  
37861 - 37866

[psbI]  
37867 - 37917  
38017 - 38019  
38029 - 38034

[psbJ]  
38155 - 38157

[psbK]  
38158 - 38166  
38173 - 38181  
38224 - 38226  
38233 - 38238  
38368 - 38370

[psbL]  
38383 - 38388  
38491 - 38493

[psbM]  
38497 - 38499  
38596 - 38604  
38608 - 38619

[psbN]  
38707 - 38709  
38752 - 38754

[psbT]  
38845 - 38853  
38866 - 38871

[psbZ]  
39058 - 39060

[rbcL]  
39769 - 39774  
40435 - 40437  
40450 - 40452  
40459 - 40461  
40480 - 40482  
40504 - 40536

[rpl2]  
40591 - 40614  
40639 - 40644  
40771 - 40773  
40792 - 40806  
40930 - 40935  
40957 - 40974  
40993 - 40998  
41431 - 41454

[rpl14]  
41731 - 41733  
41827 - 41829

[rpl16]  
41839 - 41841  
42238 - 42273

[rpl20]  
42490 - 42507  
42586 - 42603  
42652 - 42711

[rpl22]  
42712 - 42816  
43141 - 43398

[rpl23]  
43453 - 43455  
43567 - 43572  
43582 - 43587  
43678 - 43707

[rpl32]  
43774 - 43776  
43822 - 43827  
43843 - 43854  
43870 - 43902  
43912 - 44007

[rpl33]  
44017 - 44019  
44032 - 44034  
44071 - 44076  
44092 - 44103  
44230 - 44238

[rpl36]

44323 - 44325  
44353 - 44355

[rpoA]

44356 - 44361  
44368 - 44376  
44401 - 44406  
44437 - 44439  
44449 - 44451  
44464 - 44466  
44701 - 44703  
44896 - 44898  
44908 - 44913  
44983 - 44988  
45109 - 45114  
45127 - 45132  
45148 - 45150  
45190 - 45198  
45205 - 45210  
45220 - 45225  
45415 - 45420  
45436 - 45438  
45451 - 45513

[rpoB]

45514 - 45576  
45589 - 45591  
45595 - 45597  
45709 - 45729  
45826 - 45828  
46033 - 46035  
46042 - 46044  
46051 - 46053  
46258 - 46269  
46324 - 46329  
46348 - 46350  
46360 - 46362  
46708 - 46713  
47041 - 47046  
47053 - 47055  
47068 - 47076  
47110 - 47115  
47128 - 47133  
47173 - 47175  
47200 - 47202  
47512 - 47556  
47635 - 47640  
47863 - 47865  
48007 - 48009  
48508 - 48510  
48871 - 48876  
48955 - 48960  
48973 - 48981  
48991 - 48996  
49009 - 49014

[rpoC1]

|       |   |       |
|-------|---|-------|
| 49015 | - | 49035 |
| 49051 | - | 49059 |
| 49180 | - | 49191 |
| 49279 | - | 49284 |
| 49309 | - | 49311 |
| 49498 | - | 49521 |
| 49558 | - | 49560 |
| 49579 | - | 49581 |
| 49594 | - | 49602 |
| 49648 | - | 49668 |
| 49798 | - | 49824 |
| 49831 | - | 49836 |
| 49843 | - | 49848 |
| 49858 | - | 49863 |
| 49870 | - | 49878 |
| 49900 | - | 49908 |
| 50065 | - | 50067 |
| 50872 | - | 50985 |
| 51067 | - | 51072 |
| 51079 | - | 51081 |
| 51088 | - | 51093 |
| 51292 | - | 51381 |

[rpoC2]

|       |   |       |
|-------|---|-------|
| 51382 | - | 51390 |
| 51400 | - | 51405 |
| 51418 | - | 51420 |
| 51439 | - | 51453 |
| 52120 | - | 52125 |
| 52132 | - | 52179 |
| 52210 | - | 52218 |
| 52429 | - | 52434 |
| 52603 | - | 52608 |
| 52813 | - | 52818 |
| 52888 | - | 52893 |
| 52900 | - | 52926 |
| 53002 | - | 53007 |
| 53020 | - | 53025 |
| 53080 | - | 53085 |
| 53092 | - | 53094 |
| 53113 | - | 53118 |
| 53125 | - | 53130 |
| 53149 | - | 53358 |
| 53389 | - | 53391 |
| 53398 | - | 53409 |
| 53422 | - | 53427 |
| 53431 | - | 53439 |
| 53446 | - | 53448 |
| 53452 | - | 53454 |
| 53461 | - | 53466 |
| 53485 | - | 53490 |
| 53539 | - | 53544 |
| 53608 | - | 53613 |
| 53632 | - | 53634 |
| 53644 | - | 53649 |

|       |   |       |
|-------|---|-------|
| 53734 | - | 53739 |
| 53755 | - | 54255 |
| 54286 | - | 54363 |
| 54385 | - | 54387 |
| 54427 | - | 54432 |
| 54499 | - | 54501 |
| 54559 | - | 54564 |
| 54616 | - | 54618 |
| 54670 | - | 54675 |
| 54703 | - | 54708 |
| 54727 | - | 54747 |
| 54760 | - | 54765 |
| 54826 | - | 55134 |
| 55195 | - | 55200 |
| 55312 | - | 55317 |
| 55369 | - | 55374 |
| 55393 | - | 55398 |
| 55402 | - | 55404 |
| 55495 | - | 55506 |
| 55549 | - | 55554 |
| 55579 | - | 55581 |
| 55591 | - | 55614 |
| 55621 | - | 55623 |
| 55630 | - | 55632 |
| 55654 | - | 55665 |
| 55675 | - | 55680 |
| 55717 | - | 55722 |
| 55765 | - | 55770 |
| 55777 | - | 55782 |
| 55792 | - | 55794 |
| 55804 | - | 55821 |
| 55834 | - | 55836 |
| 55846 | - | 56046 |
| 56065 | - | 56085 |
| 56137 | - | 56139 |
| 56143 | - | 56145 |
| 56182 | - | 56184 |
| 56215 | - | 56220 |
| 56239 | - | 56310 |
| 56416 | - | 56496 |
| 56509 | - | 56511 |
| 56521 | - | 56526 |
| 56557 | - | 56562 |
| 56596 | - | 56601 |
| 56611 | - | 56616 |
| 56785 | - | 56787 |
| 56878 | - | 56880 |
| 57346 | - | 57348 |
| 57370 | - | 57375 |
| 57397 | - | 57408 |
| 57415 | - | 57420 |
| 57427 | - | 57438 |
| 57451 | - | 57456 |
| 57475 | - | 57477 |
| 57499 | - | 57504 |
| 57538 | - | 58080 |

[rps2]  
58192 - 58197  
58783 - 58788  
58801 - 58857

[rps3]  
58897 - 58899  
58942 - 58944  
59008 - 59010  
59014 - 59019  
59038 - 59106  
59119 - 59124  
59194 - 59220  
59245 - 59250  
59257 - 59262  
59296 - 59298  
59467 - 59469  
59506 - 59511  
59644 - 59655

[rps4]  
59725 - 59730  
59740 - 59808  
59848 - 59853  
59860 - 59862  
60214 - 60219  
60244 - 60273  
60325 - 60327  
60370 - 60378

[rps7]  
60604 - 60609  
60790 - 60792  
60856 - 60867

[rps8]  
60961 - 60966  
61042 - 61047  
61075 - 61080  
61099 - 61104  
61126 - 61131  
61306 - 61308

[rps11]  
61336 - 61338  
61345 - 61368  
61408 - 61410  
61597 - 61599  
61756 - 61758

[rps12]  
61873 - 61908  
62164 - 62238

[rps14]  
62239 - 62244  
62377 - 62385



62563 - 62565

[rps15]

62566 - 62610

62620 - 62622

62638 - 62643

62653 - 62688

62695 - 62697

62872 - 62880

62917 - 62928

[rps16]

63106 - 63111

63166 - 63264

[rps18]

63274 - 63279

63319 - 63435

63445 - 63447

63454 - 63456

63460 - 63462

63631 - 64035

64063 - 64071

64081 - 64086

64102 - 64215

[rps19]

64228 - 64233

64243 - 64275

64495 - 64497

64513 - 64575

64603 - 64605

[ycf1]

64606 - 64710

64768 - 64773

64792 - 64815

64891 - 64917

64945 - 64947

65065 - 65070

65104 - 65112

65128 - 65166

65398 - 65436

65467 - 65484

65491 - 65496

65524 - 65529

65581 - 65586

65605 - 65610

65629 - 72720

[ycf2]

72721 - 72786

72793 - 72807

72814 - 72819

72826 - 72831

72835 - 72846

72907 - 72924

|       |   |       |
|-------|---|-------|
| 73042 | - | 73053 |
| 73087 | - | 73104 |
| 73114 | - | 73116 |
| 73126 | - | 73128 |
| 73141 | - | 73143 |
| 73171 | - | 73173 |
| 73330 | - | 73380 |
| 73432 | - | 73455 |
| 73477 | - | 73485 |
| 73489 | - | 73491 |
| 73585 | - | 73590 |
| 73666 | - | 73671 |
| 73753 | - | 73758 |
| 73840 | - | 73842 |
| 73870 | - | 73872 |
| 73933 | - | 73938 |
| 74020 | - | 74022 |
| 74053 | - | 74055 |
| 74122 | - | 74271 |
| 74305 | - | 74310 |
| 74326 | - | 74331 |
| 74377 | - | 74379 |
| 74407 | - | 74409 |
| 74413 | - | 74445 |
| 74470 | - | 74475 |
| 74542 | - | 74547 |
| 74584 | - | 74589 |
| 74623 | - | 74628 |
| 74638 | - | 74646 |
| 74698 | - | 74703 |
| 74719 | - | 74724 |
| 74749 | - | 74751 |
| 74785 | - | 74787 |
| 74791 | - | 74793 |
| 74845 | - | 74916 |
| 75046 | - | 75096 |
| 75220 | - | 75225 |
| 75238 | - | 75240 |
| 75247 | - | 75252 |
| 75349 | - | 75384 |
| 75460 | - | 75468 |
| 75577 | - | 75579 |
| 75658 | - | 75663 |
| 75673 | - | 75678 |
| 75757 | - | 75762 |
| 75838 | - | 75843 |
| 75850 | - | 75852 |
| 76012 | - | 76020 |
| 76027 | - | 76047 |
| 76057 | - | 76104 |
| 76108 | - | 76113 |
| 76126 | - | 76131 |
| 76174 | - | 76239 |
| 76270 | - | 76272 |
| 76285 | - | 76287 |
| 76306 | - | 76371 |
| 76396 | - | 76398 |

|       |   |       |
|-------|---|-------|
| 76429 | - | 76431 |
| 76462 | - | 76464 |
| 76558 | - | 76566 |
| 76648 | - | 76650 |
| 76660 | - | 76662 |
| 76720 | - | 76722 |
| 76888 | - | 76896 |
| 76930 | - | 76935 |
| 76954 | - | 76974 |
| 77017 | - | 77022 |
| 77044 | - | 77046 |
| 77065 | - | 77070 |
| 77107 | - | 77130 |
| 77140 | - | 77145 |
| 77155 | - | 77157 |
| 77179 | - | 77190 |
| 77236 | - | 77241 |
| 77335 | - | 77340 |
| 77380 | - | 77382 |
| 77395 | - | 77400 |
| 77467 | - | 77640 |
| 77650 | - | 77703 |
| 77713 | - | 77718 |
| 77725 | - | 77730 |
| 77752 | - | 77775 |
| 77794 | - | 77796 |
| 77833 | - | 77835 |
| 77851 | - | 77853 |
| 77917 | - | 77919 |
| 77926 | - | 77928 |
| 77941 | - | 78144 |
| 78166 | - | 78189 |
| 78241 | - | 78246 |
| 78268 | - | 78321 |
| 78334 | - | 78342 |
| 78352 | - | 78399 |
| 78421 | - | 78426 |
| 78442 | - | 78447 |
| 78463 | - | 78468 |
| 78601 | - | 78606 |
| 78709 | - | 78759 |
| 78775 | - | 78936 |
| 79042 | - | 79047 |
| 79216 | - | 79269 |
| 79279 | - | 79281 |
| 79291 | - | 79305 |
| 79312 | - | 79317 |
| 79405 | - | 79410 |
| 79474 | - | 79488 |
| 79690 | - | 79692 |
| 79735 | - | 79737 |
| 79807 | - | 79809 |
| 79858 | - | 79860 |
| 79873 | - | 80304 |
| 80335 | - | 80340 |
| 80359 | - | 80430 |
| 80536 | - | 80562 |

|       |   |       |
|-------|---|-------|
| 80599 | - | 80604 |
| 80623 | - | 80625 |
| 80638 | - | 80640 |
| 80794 | - | 80799 |
| 80824 | - | 80829 |
| 80986 | - | 80994 |
| 81082 | - | 81093 |
| 81130 | - | 81138 |
| 81145 | - | 81147 |
| 81187 | - | 81195 |
| 81331 | - | 81336 |
| 81358 | - | 81378 |
| 81385 | - | 81399 |
| 81406 | - | 81414 |
| 81424 | - | 81429 |
| 81439 | - | 81444 |
| 81457 | - | 81852 |
| 81889 | - | 81894 |
| 81964 | - | 81966 |
| 82012 | - | 82032 |
| 82054 | - | 82059 |
| 82066 | - | 82068 |
| 82087 | - | 82092 |
| 82099 | - | 82101 |
| 82138 | - | 82140 |
| 82153 | - | 82164 |
| 82192 | - | 82200 |
| 82219 | - | 82620 |
| 82660 | - | 82665 |
| 82714 | - | 82716 |
| 82720 | - | 82722 |
| 82744 | - | 82749 |
| 82762 | - | 82767 |
| 82777 | - | 82782 |
| 82813 | - | 82818 |
| 82828 | - | 82830 |
| 82846 | - | 82848 |
| 82870 | - | 82875 |
| 82885 | - | 82890 |
| 82894 | - | 82896 |
| 82909 | - | 82953 |
| 82975 | - | 82977 |
| 82987 | - | 82995 |
| 83008 | - | 83013 |
| 83050 | - | 83055 |
| 83074 | - | 83079 |
| 83116 | - | 83121 |
| 83128 | - | 83133 |
| 83152 | - | 83157 |
| 83179 | - | 83184 |
| 83299 | - | 83376 |

[ycf3]

|       |   |       |
|-------|---|-------|
| 83389 | - | 83391 |
| 83506 | - | 83514 |
| 83545 | - | 83547 |
| 83893 | - | 83943 |

```
[ycf4]
83944 -      83976
83998 -      84018
84157 -      84159
84166 -      84177
84412 -      84426
84448 -      84453
84478 -      84483
84520 -      84525
84589 -      84591
84598 -      84621
;

[
[COMMAND BLOCKS TO LOAD PARTITIONS INTO MEMORY]

[61 genes]

exclude all;
include 6lgenes;
exclude exchars;

[61 genes, 1st and 2nd codon positions]

exclude all;
include 6lgenes;
exclude cod3;
exclude exchars;

[fast genes]

exclude all;
include fastgenes;
exclude exchars;

[slow genes]

exclude all;
include slowgenes;
exclude exchars;

]

END;
```
