# Supplementary material
Source: PubMed Central journal article supplement (PMC2148295)

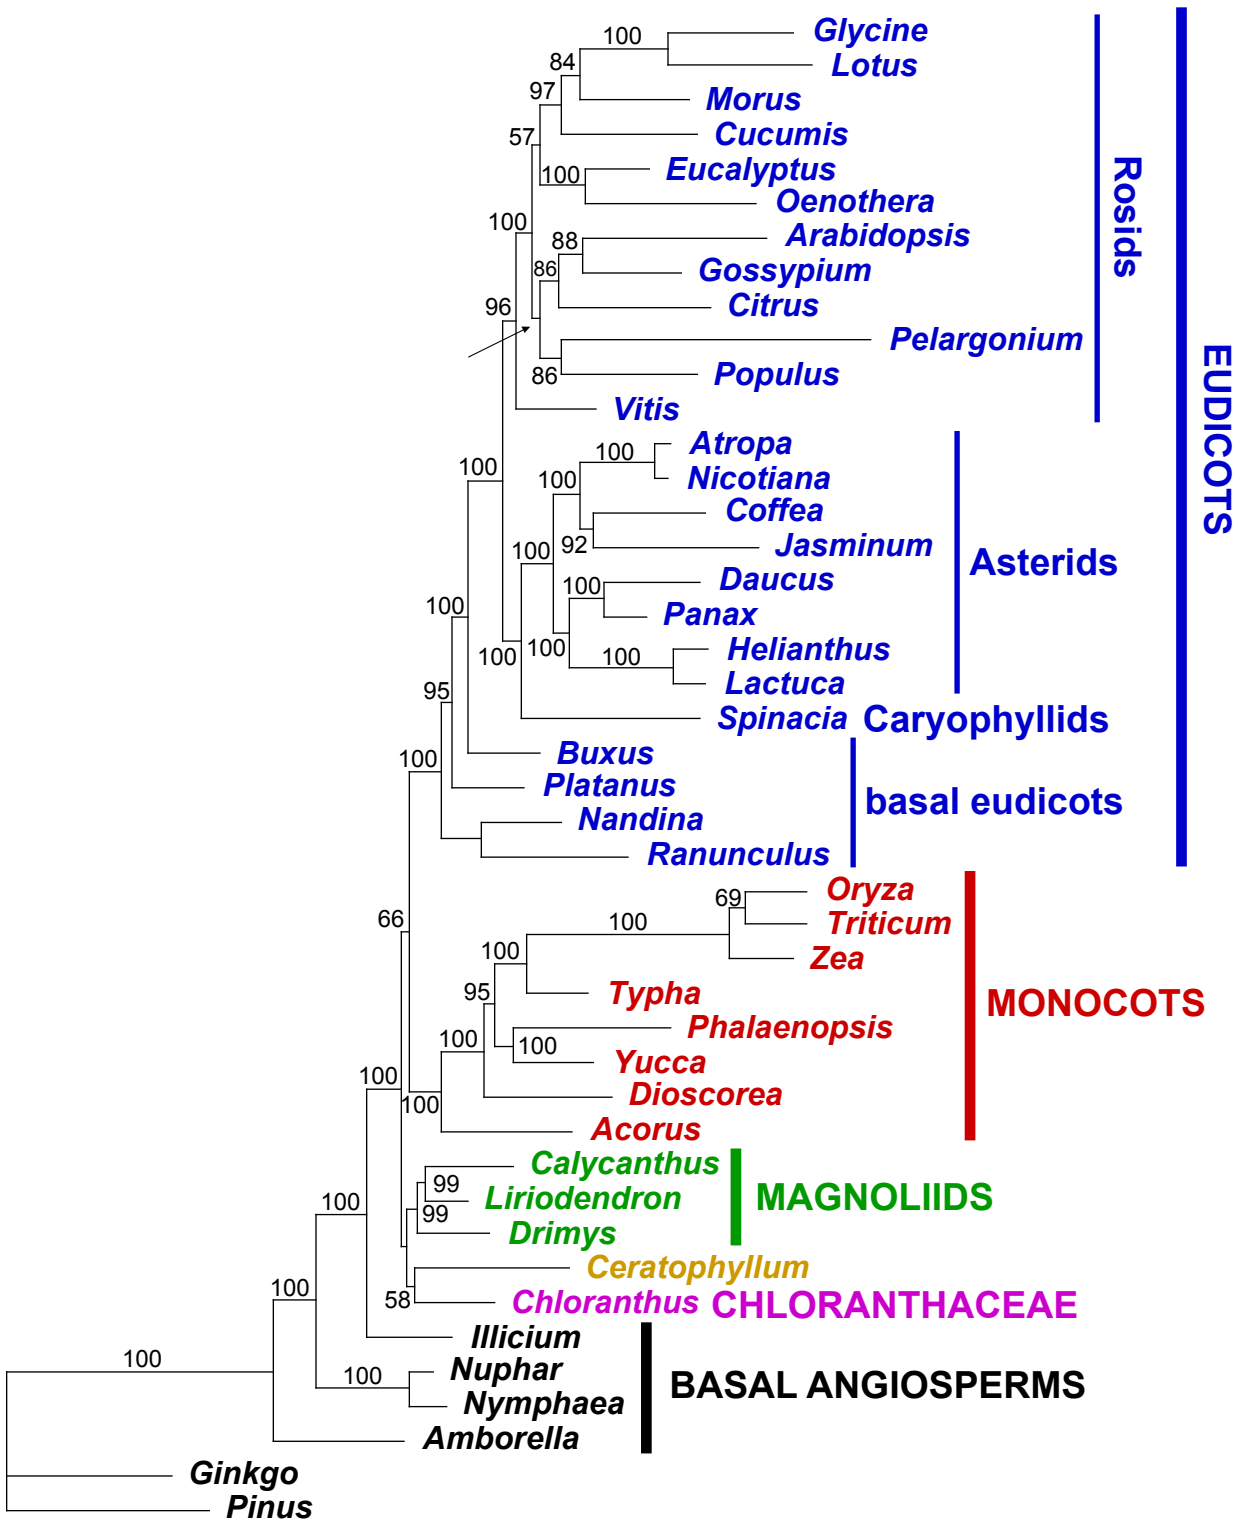

— 500 changes

Supplement: 0708072104_10.pdf [file 0708072104_10.pdf]

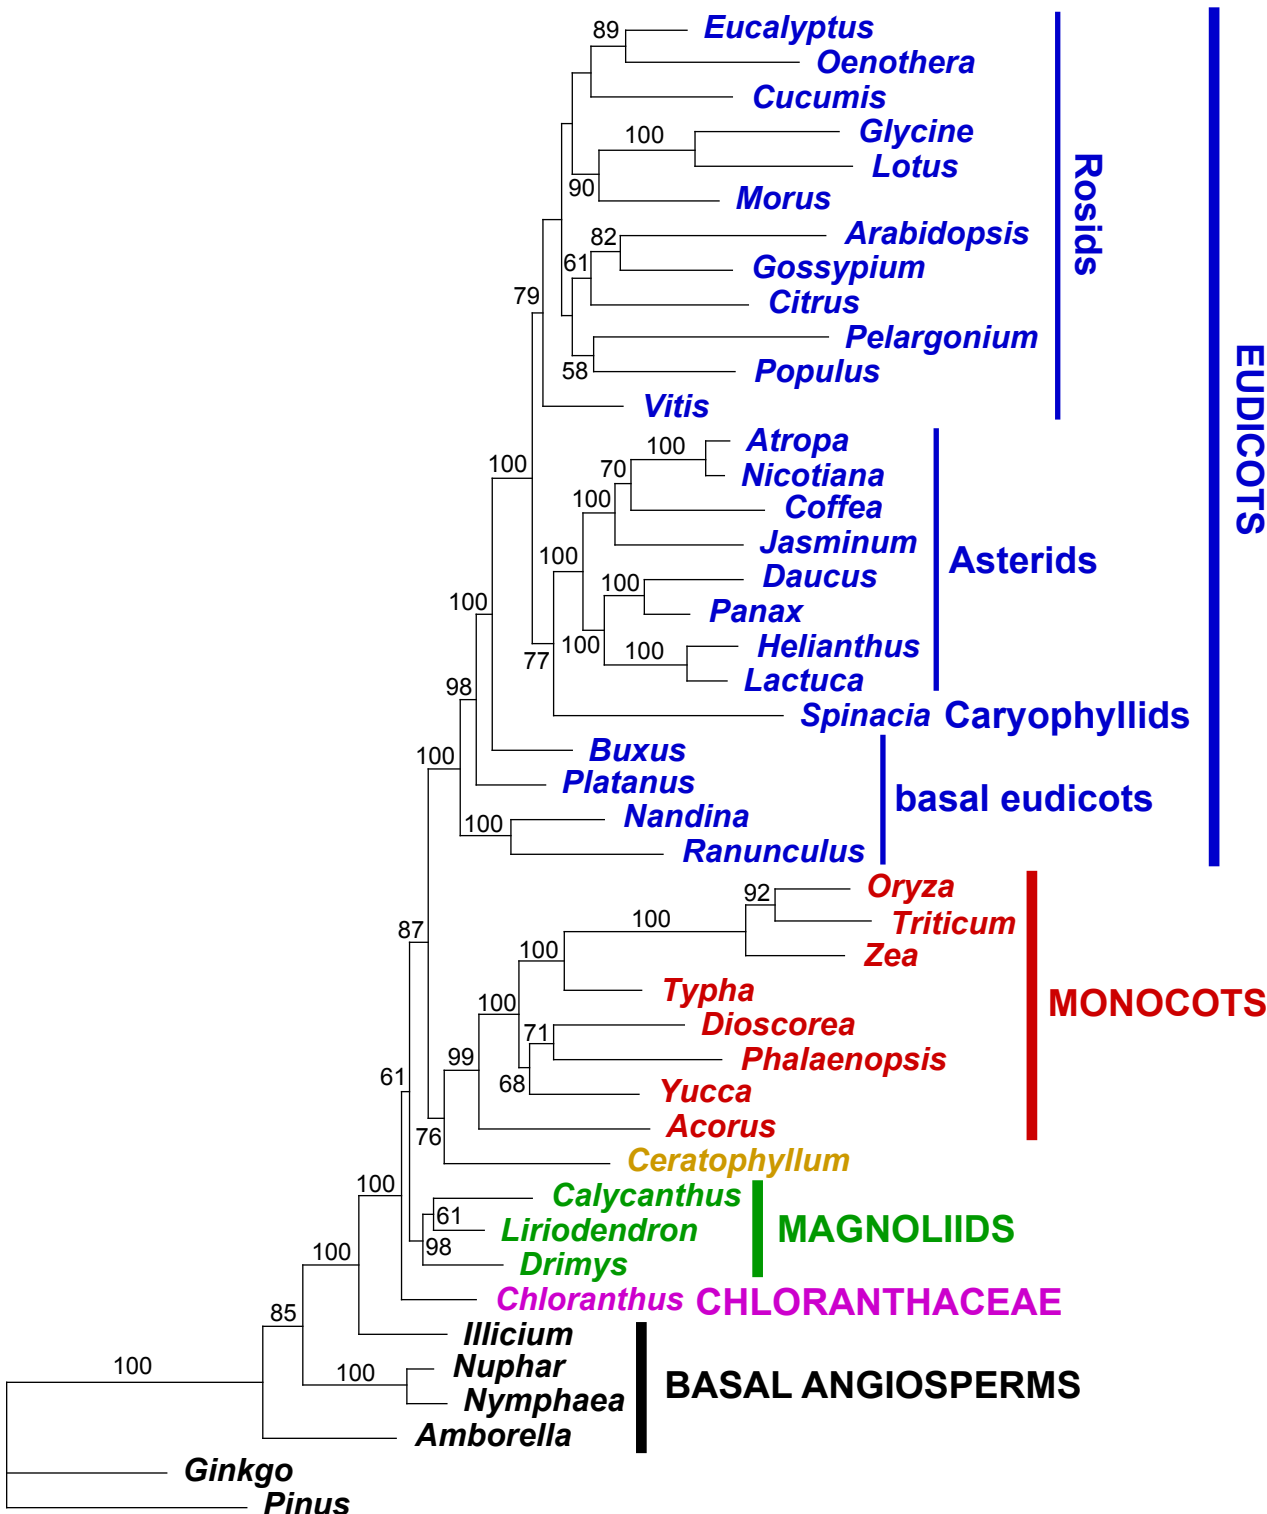

500 changes

Supplement: 0708072104_11.pdf [file 0708072104_11.pdf]

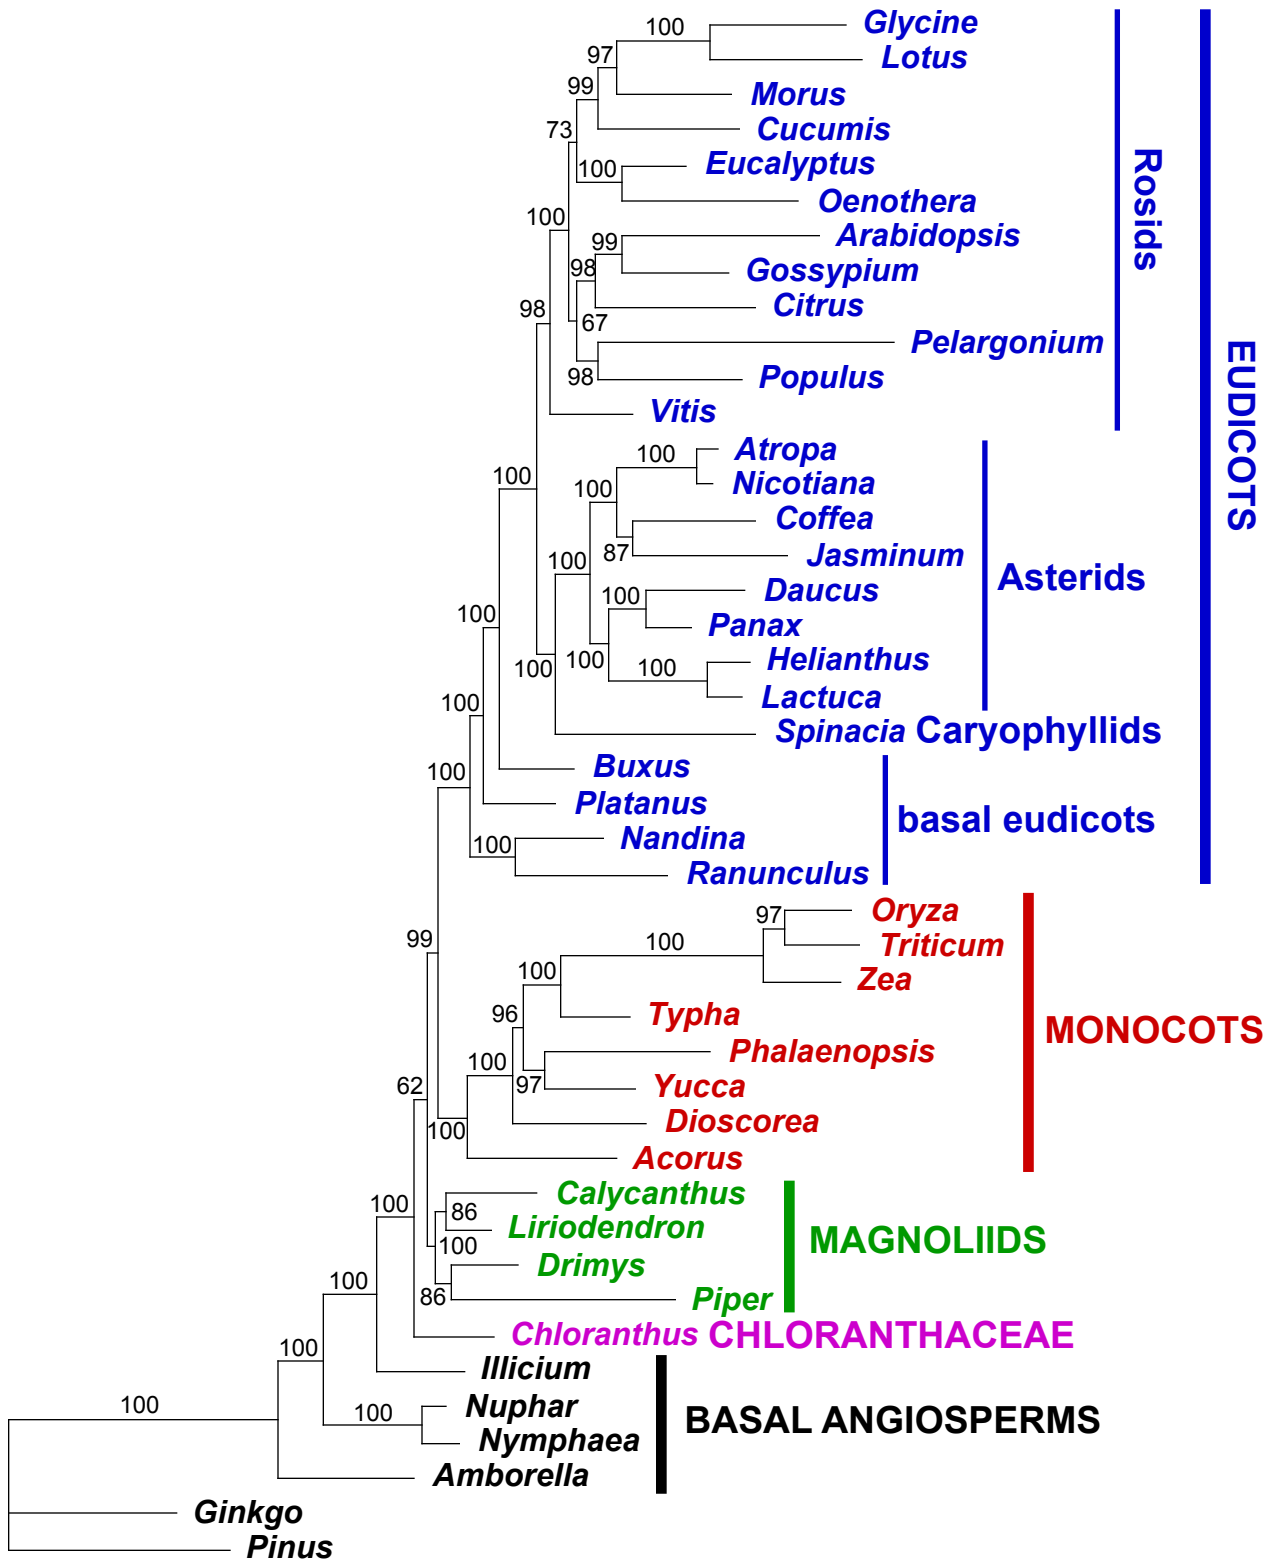

Supplement: 0708072104_12.pdf [file 0708072104_12.pdf]

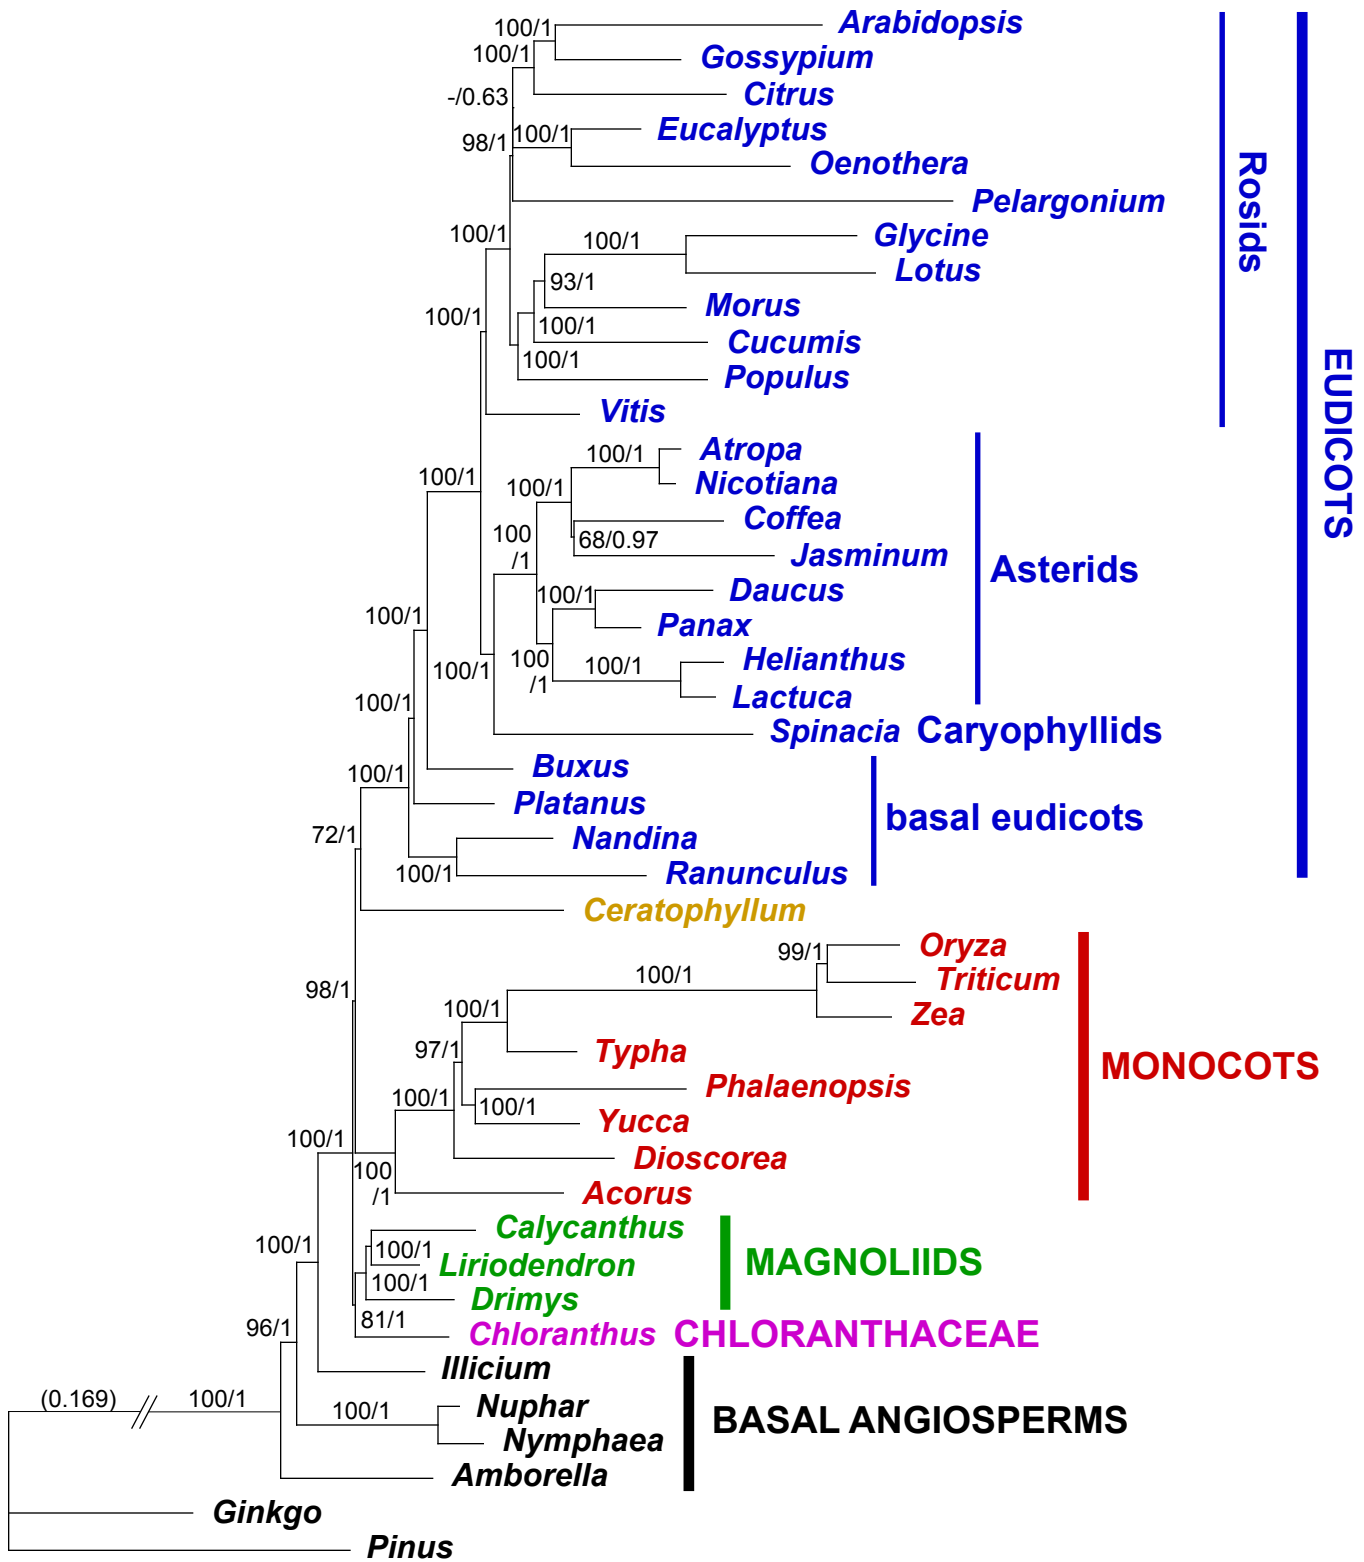

— 0.01 substitutions/site

Supplement: 0708072104_13.pdf [file 0708072104_13.pdf]

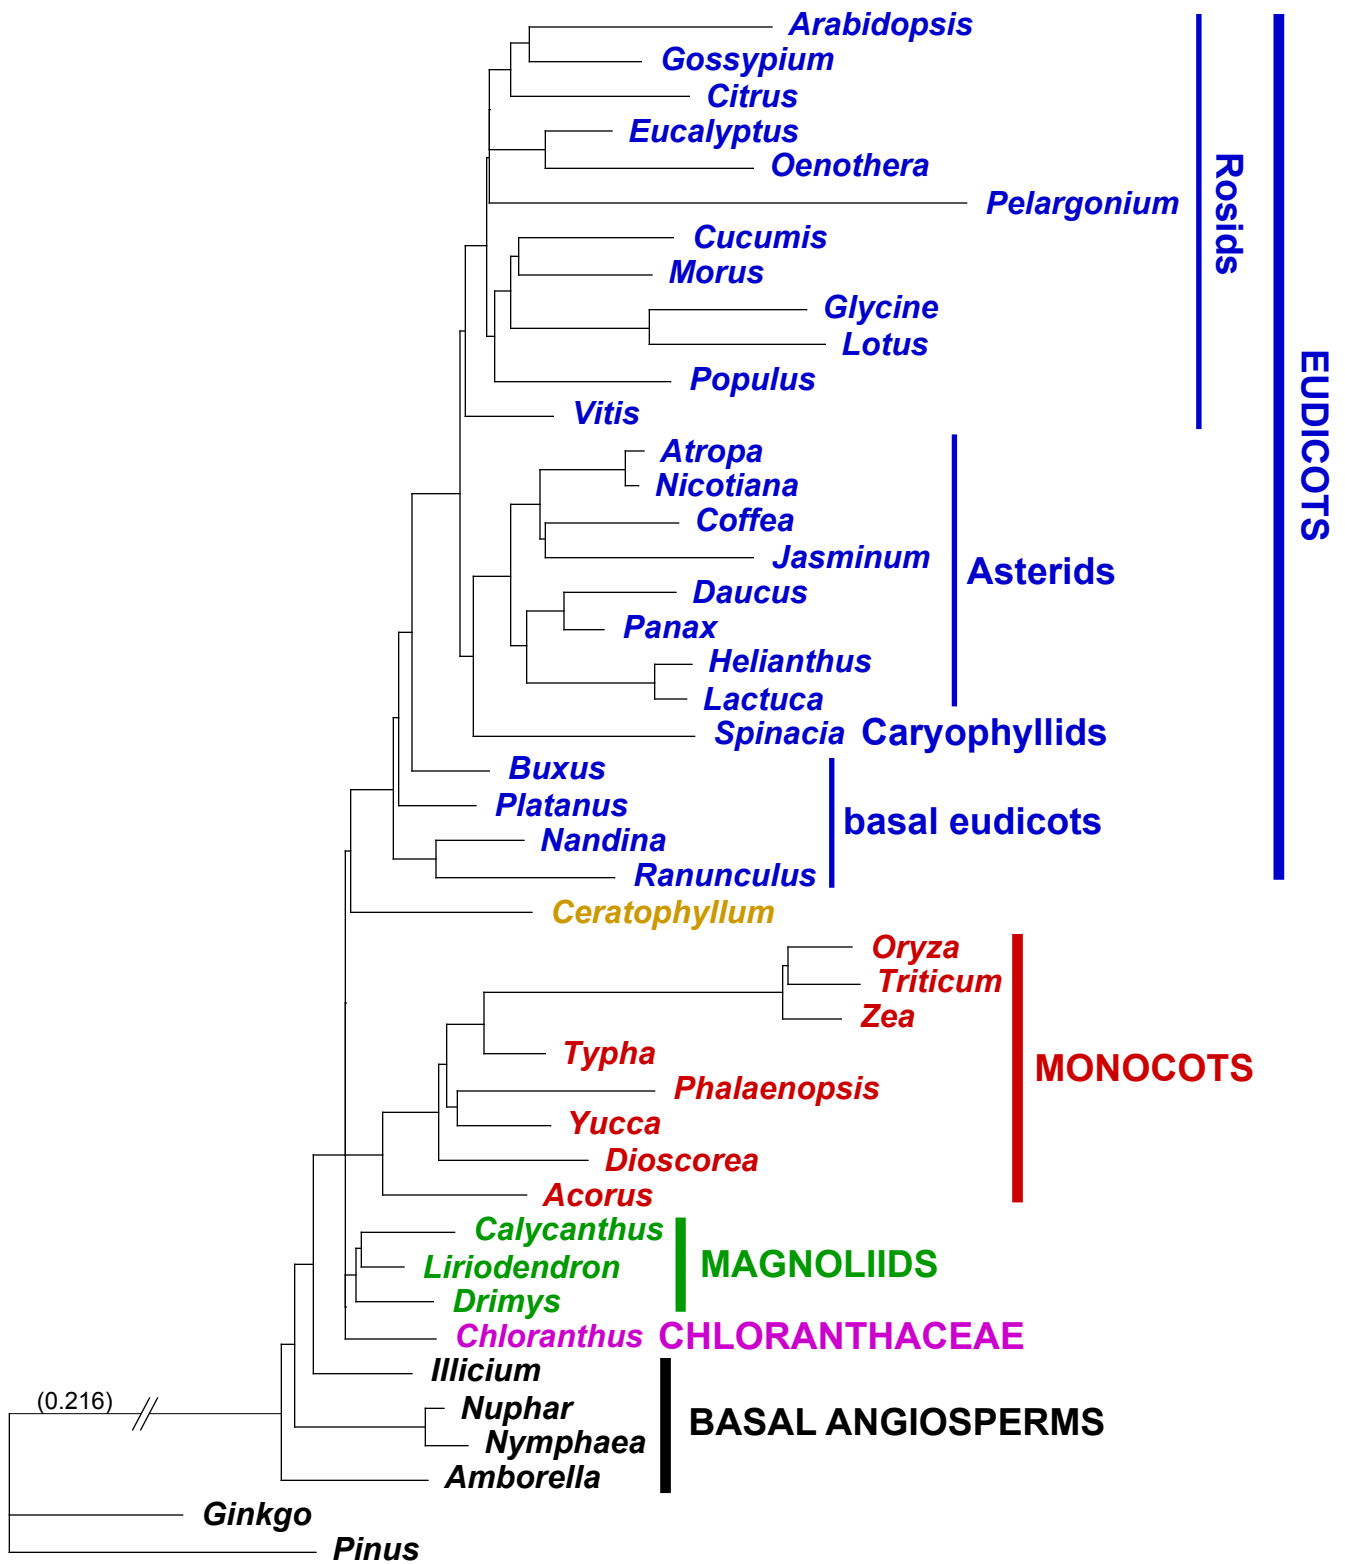

0.05 substitutions/site

Supplement: 0708072104_14.pdf [file 0708072104_14.pdf]

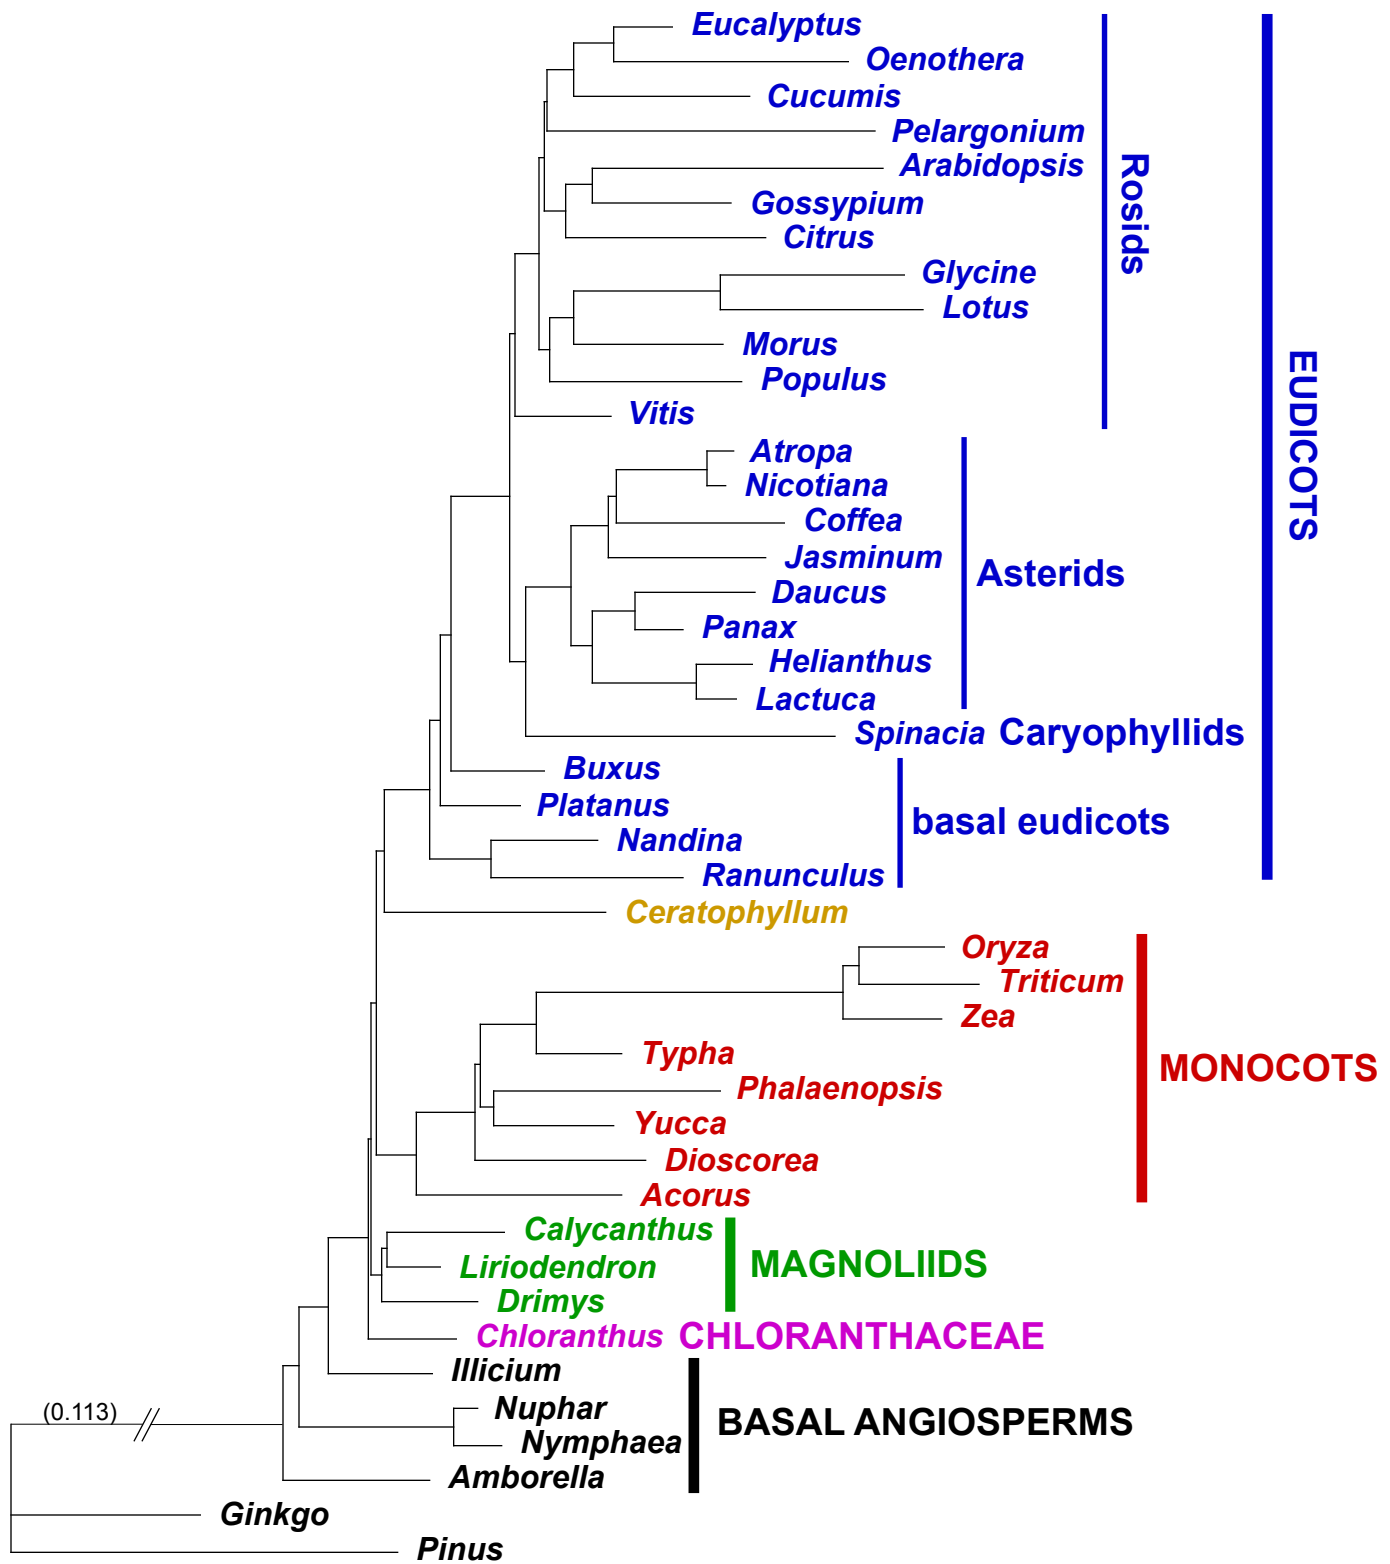

— 0.01 substitutions/site

Supplement: 0708072104_15.pdf [file 0708072104_15.pdf]

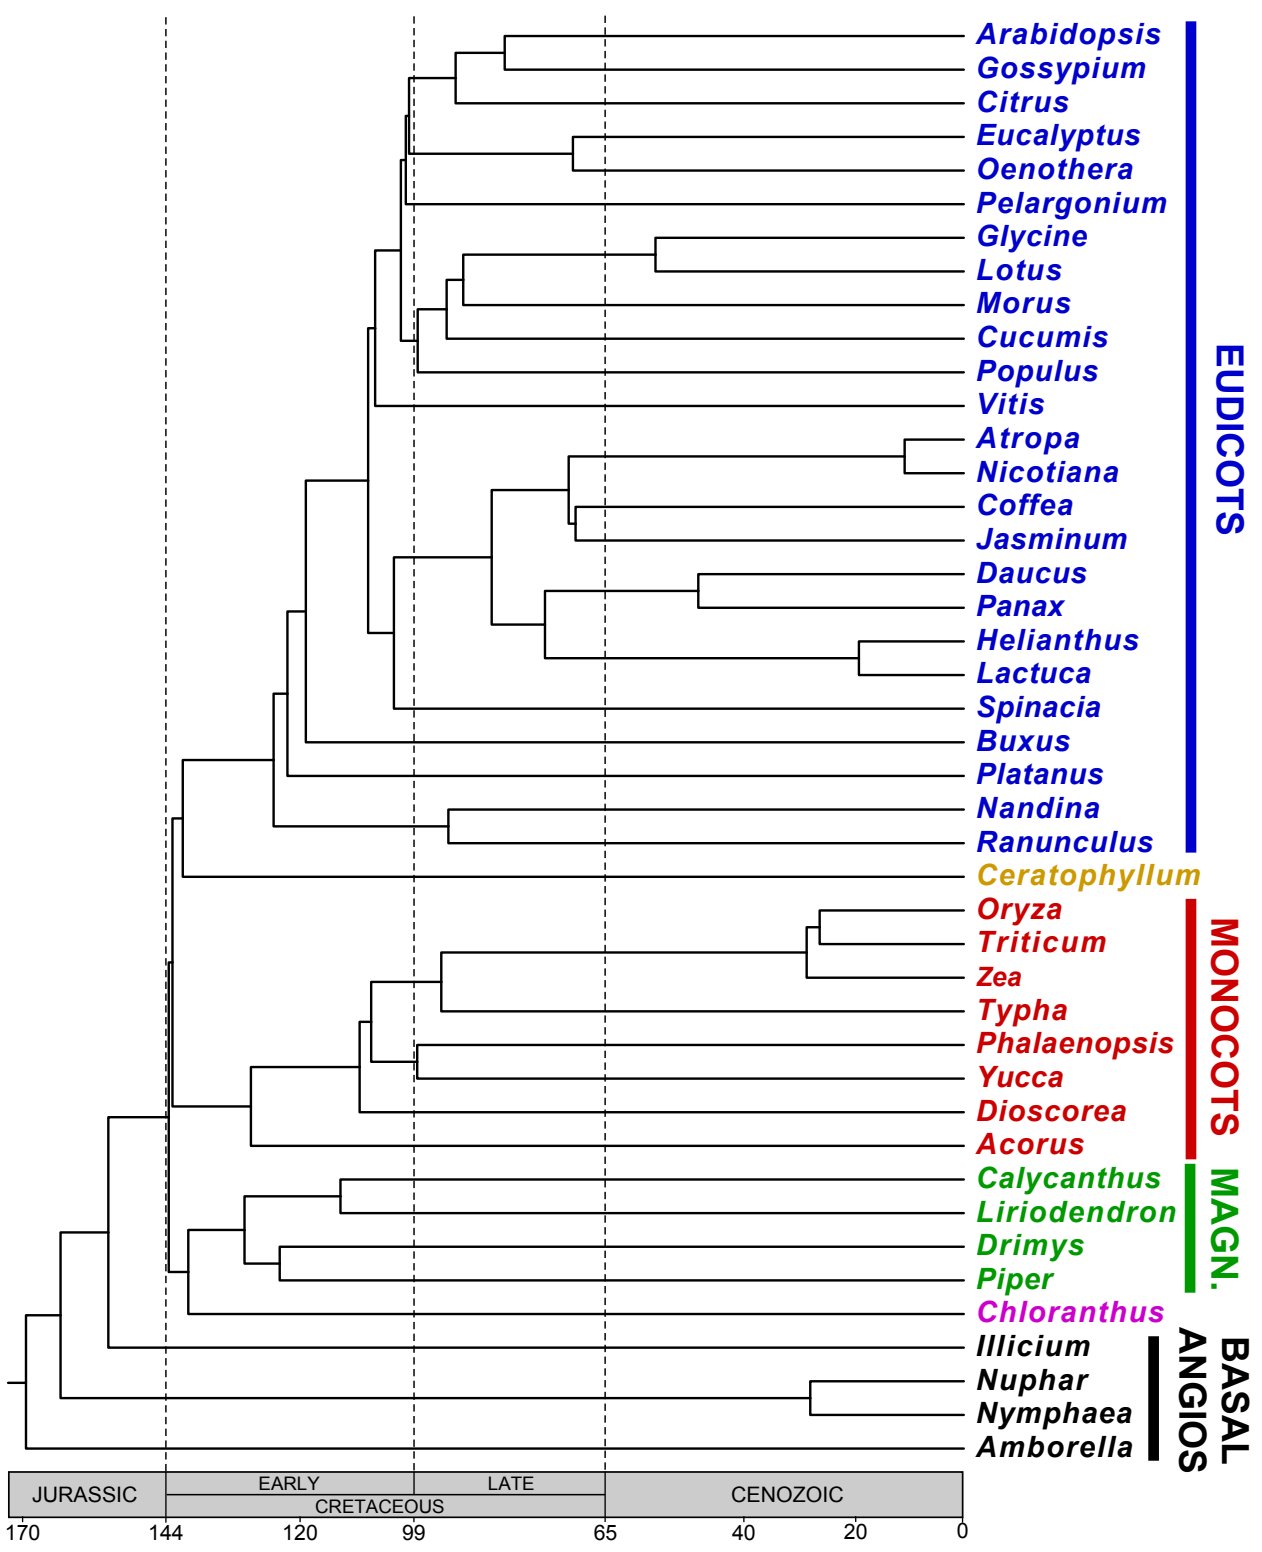

Supplement: 0708072104_16.pdf [file 0708072104_16.pdf]

**codon 1+2, tv**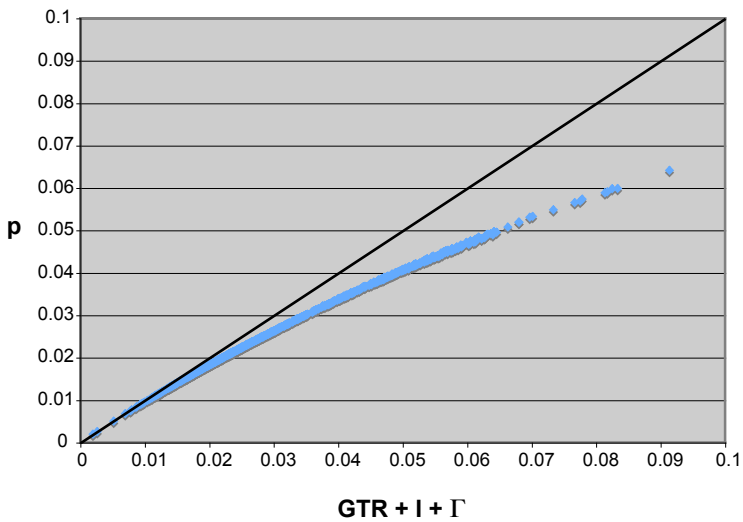**codon 1+2, ti**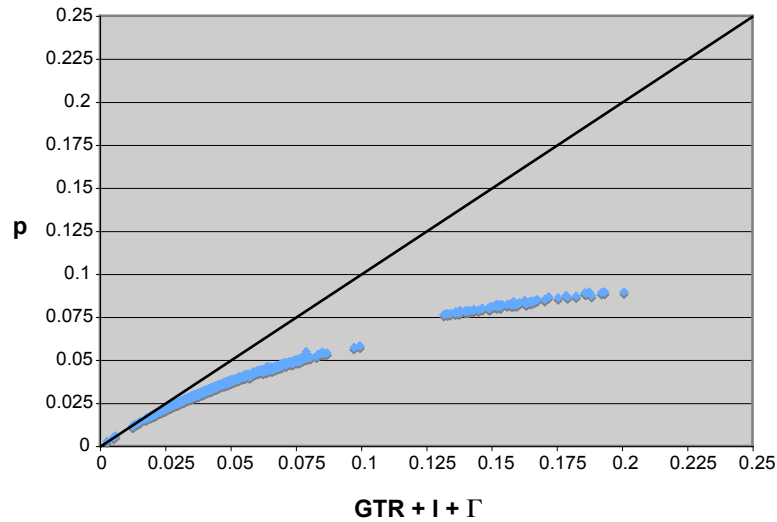**codon 3, tv**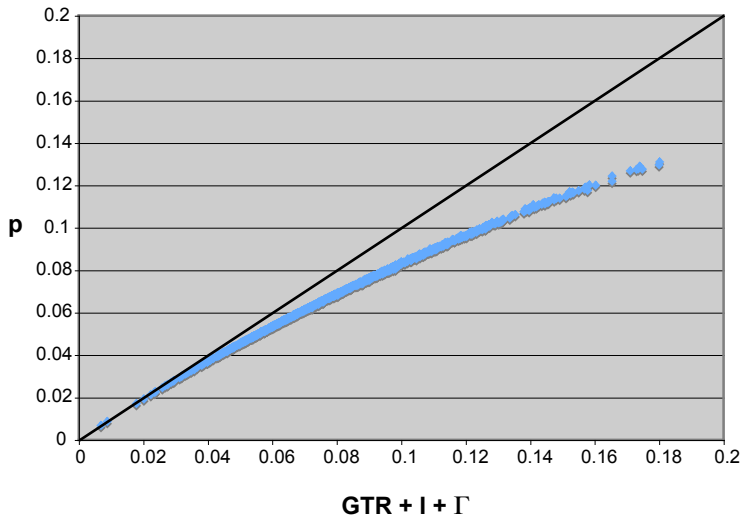**codon 3, ti**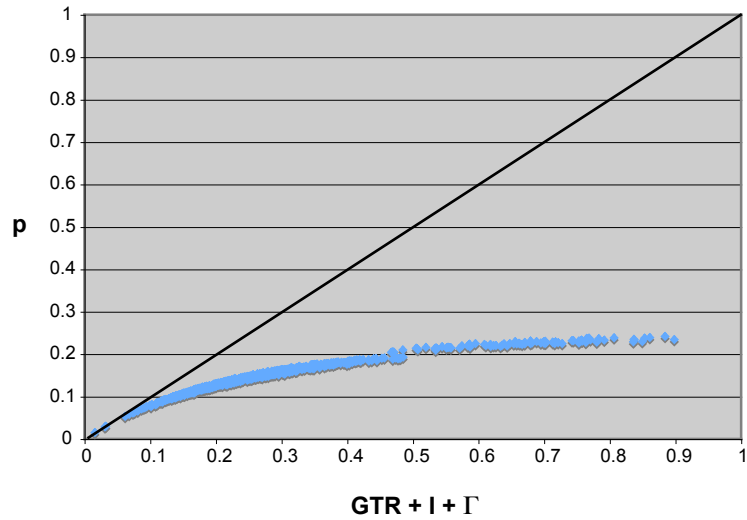

Supplement: 0708072104_17.pdf [file 0708072104_17.pdf]

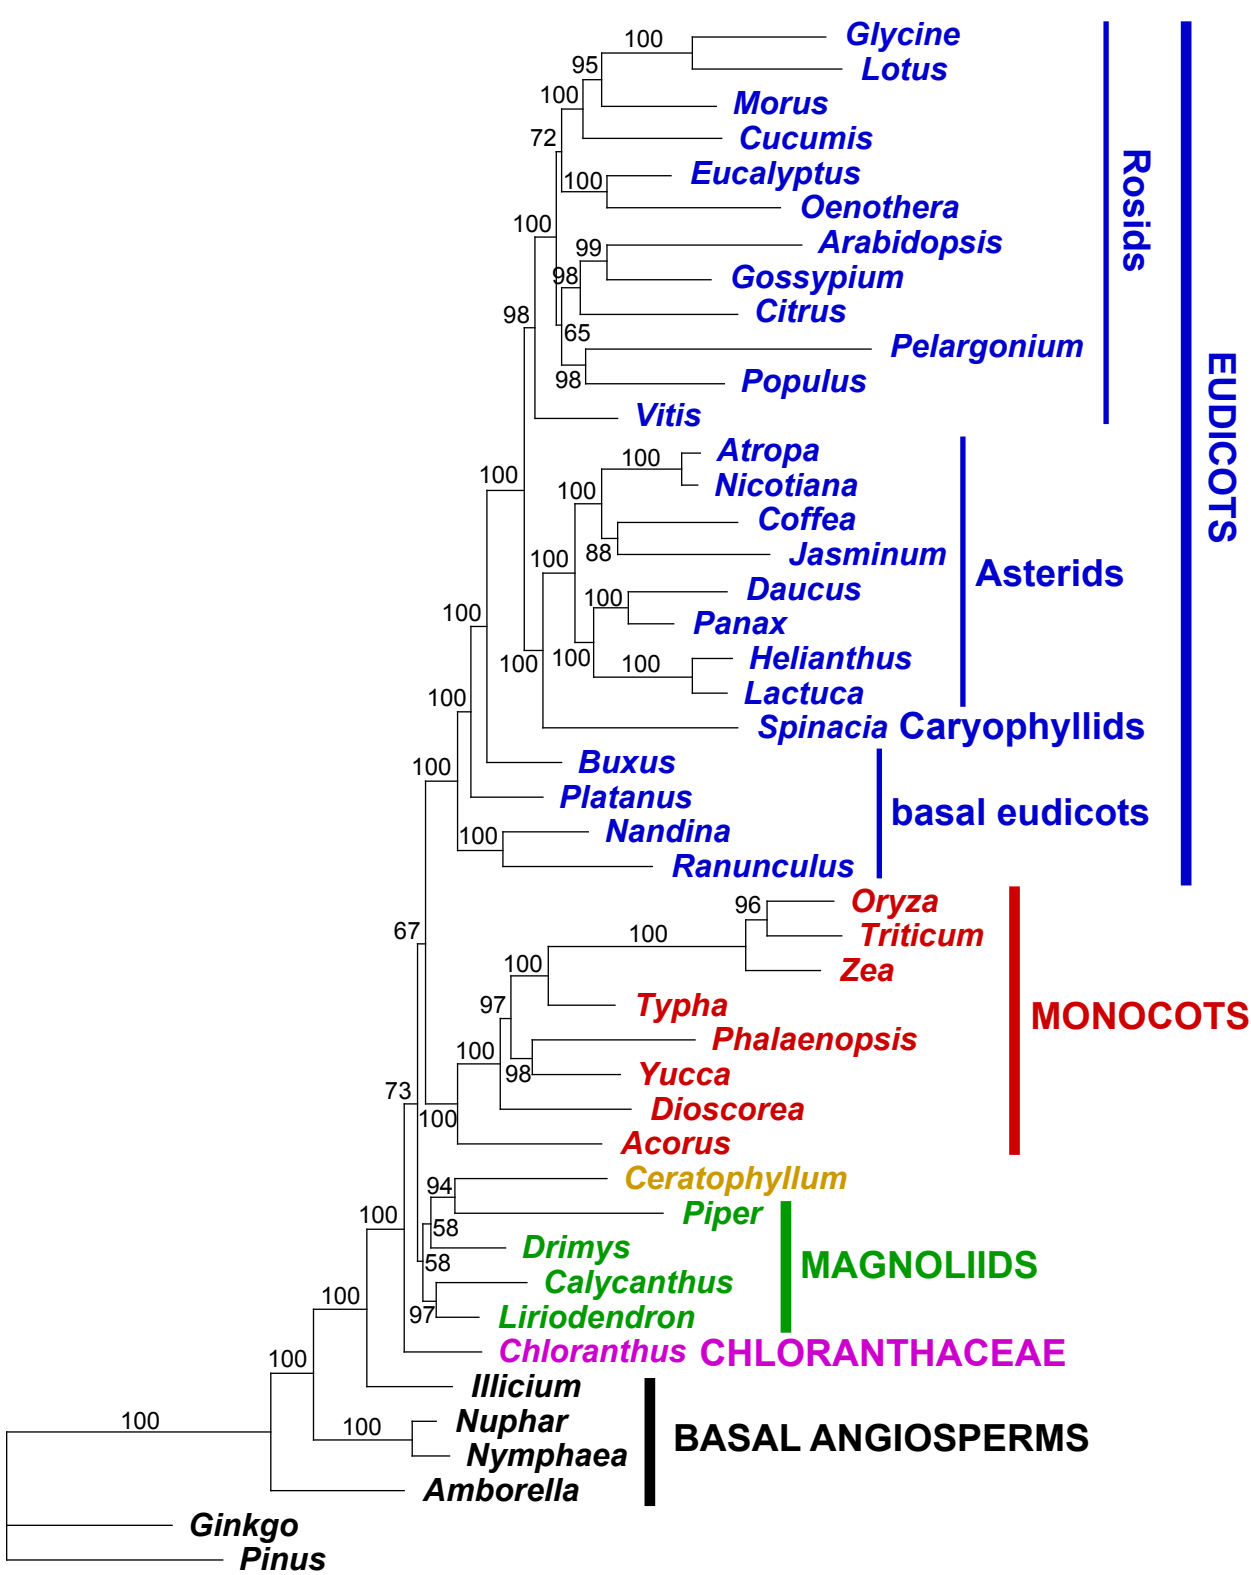

— 1000 changes

Supplement: 0708072104_2.pdf [file 0708072104_2.pdf]

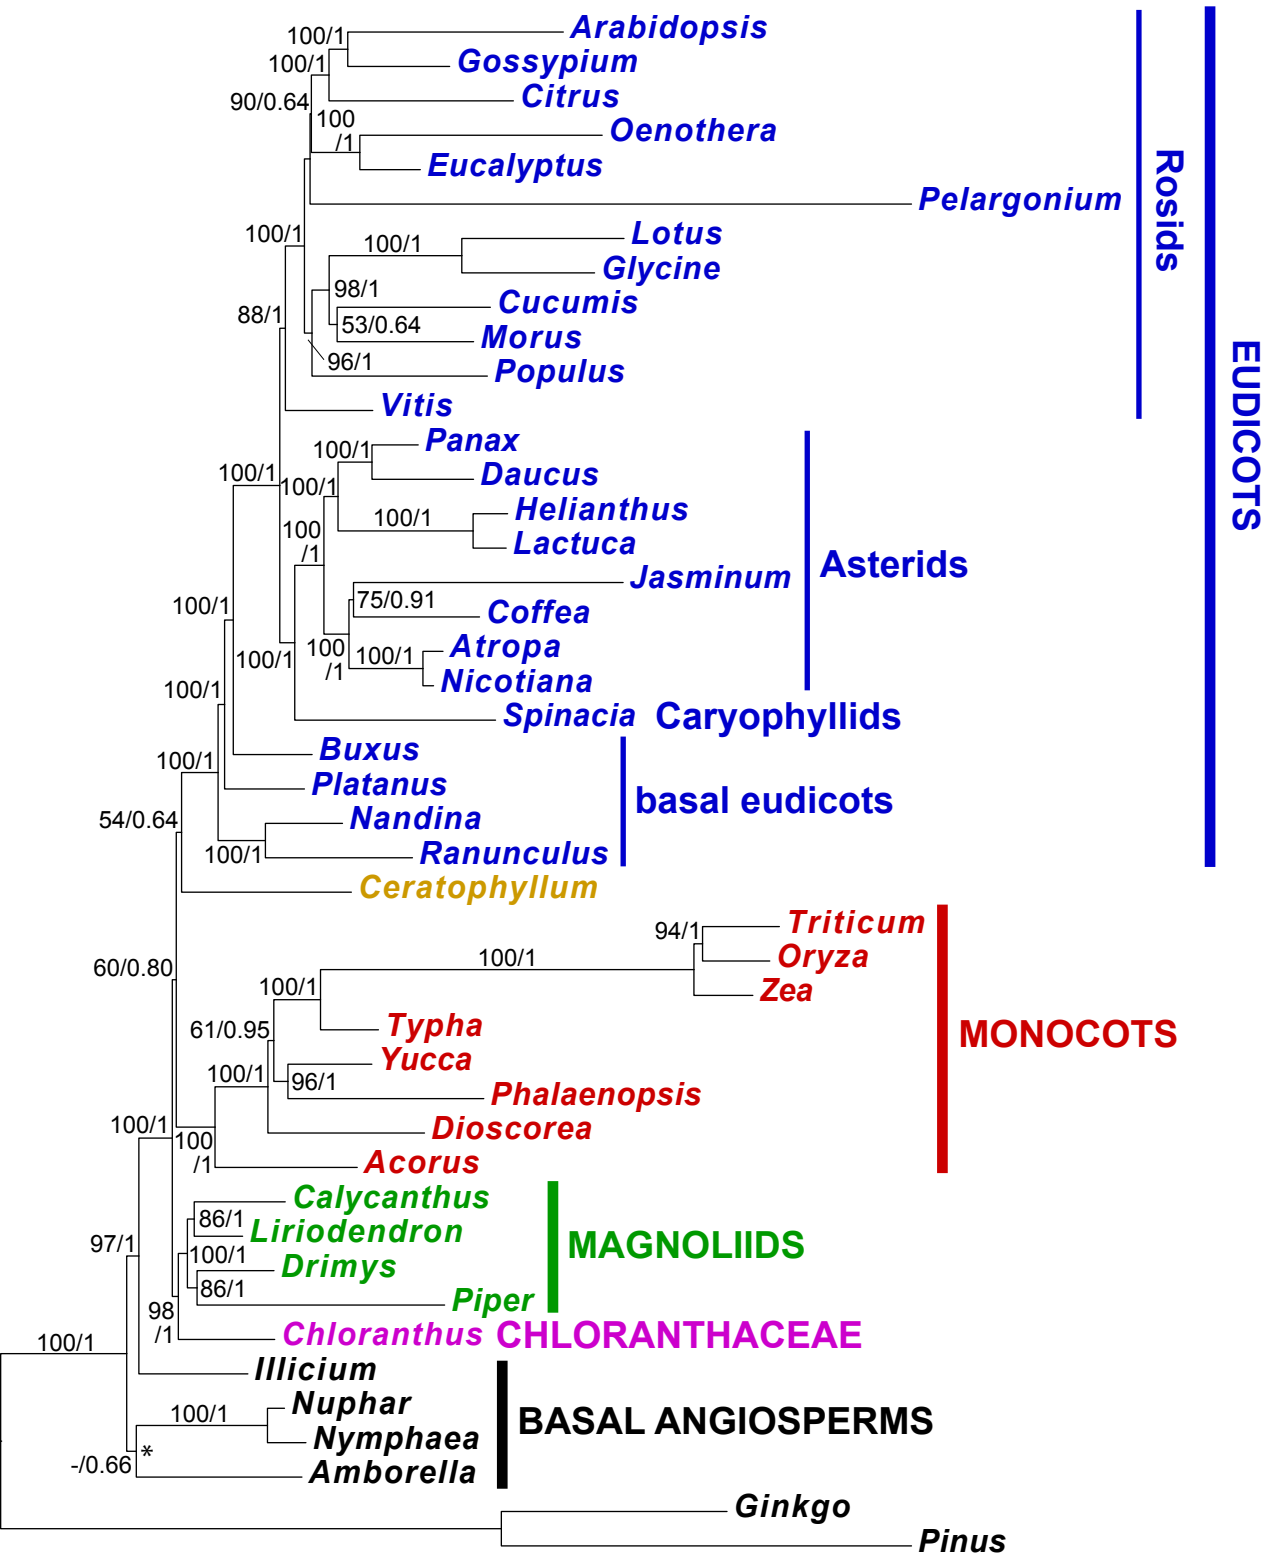

0.03 substitutions/site

Supplement: 0708072104_3.pdf [file 0708072104_3.pdf]

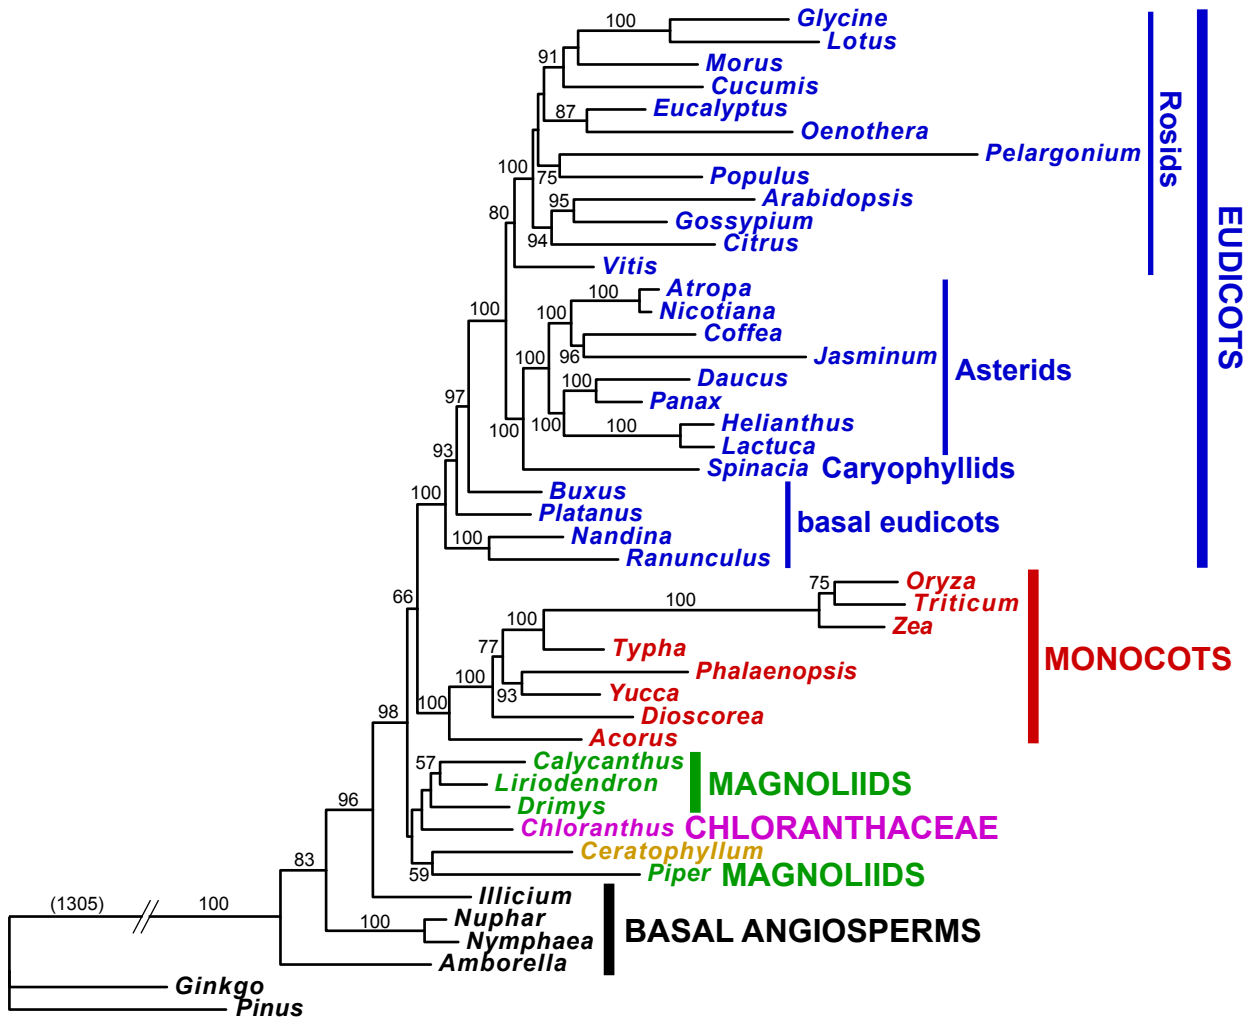

500 changes

Supplement: 0708072104_4.pdf [file 0708072104_4.pdf]

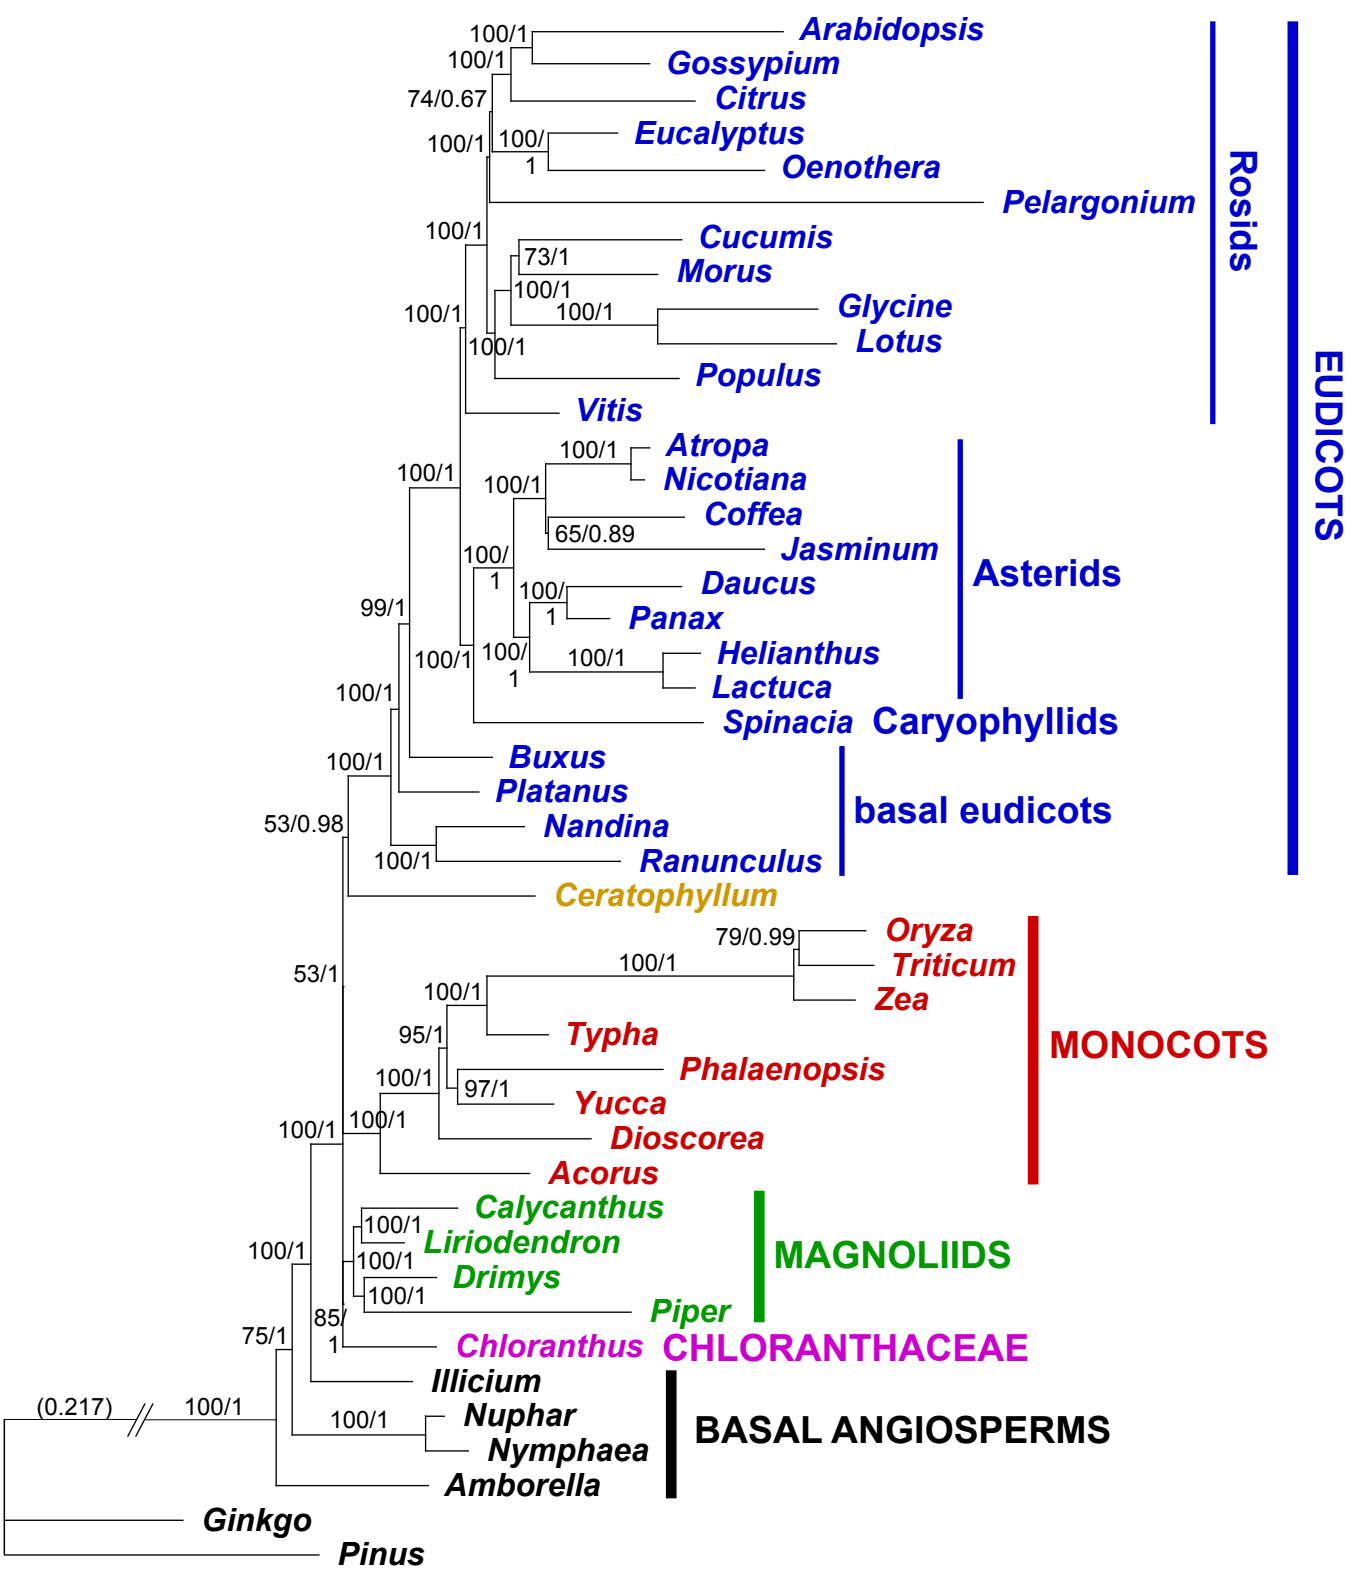

0.05 substitutions/site

Supplement: 0708072104_5.pdf [file 0708072104_5.pdf]

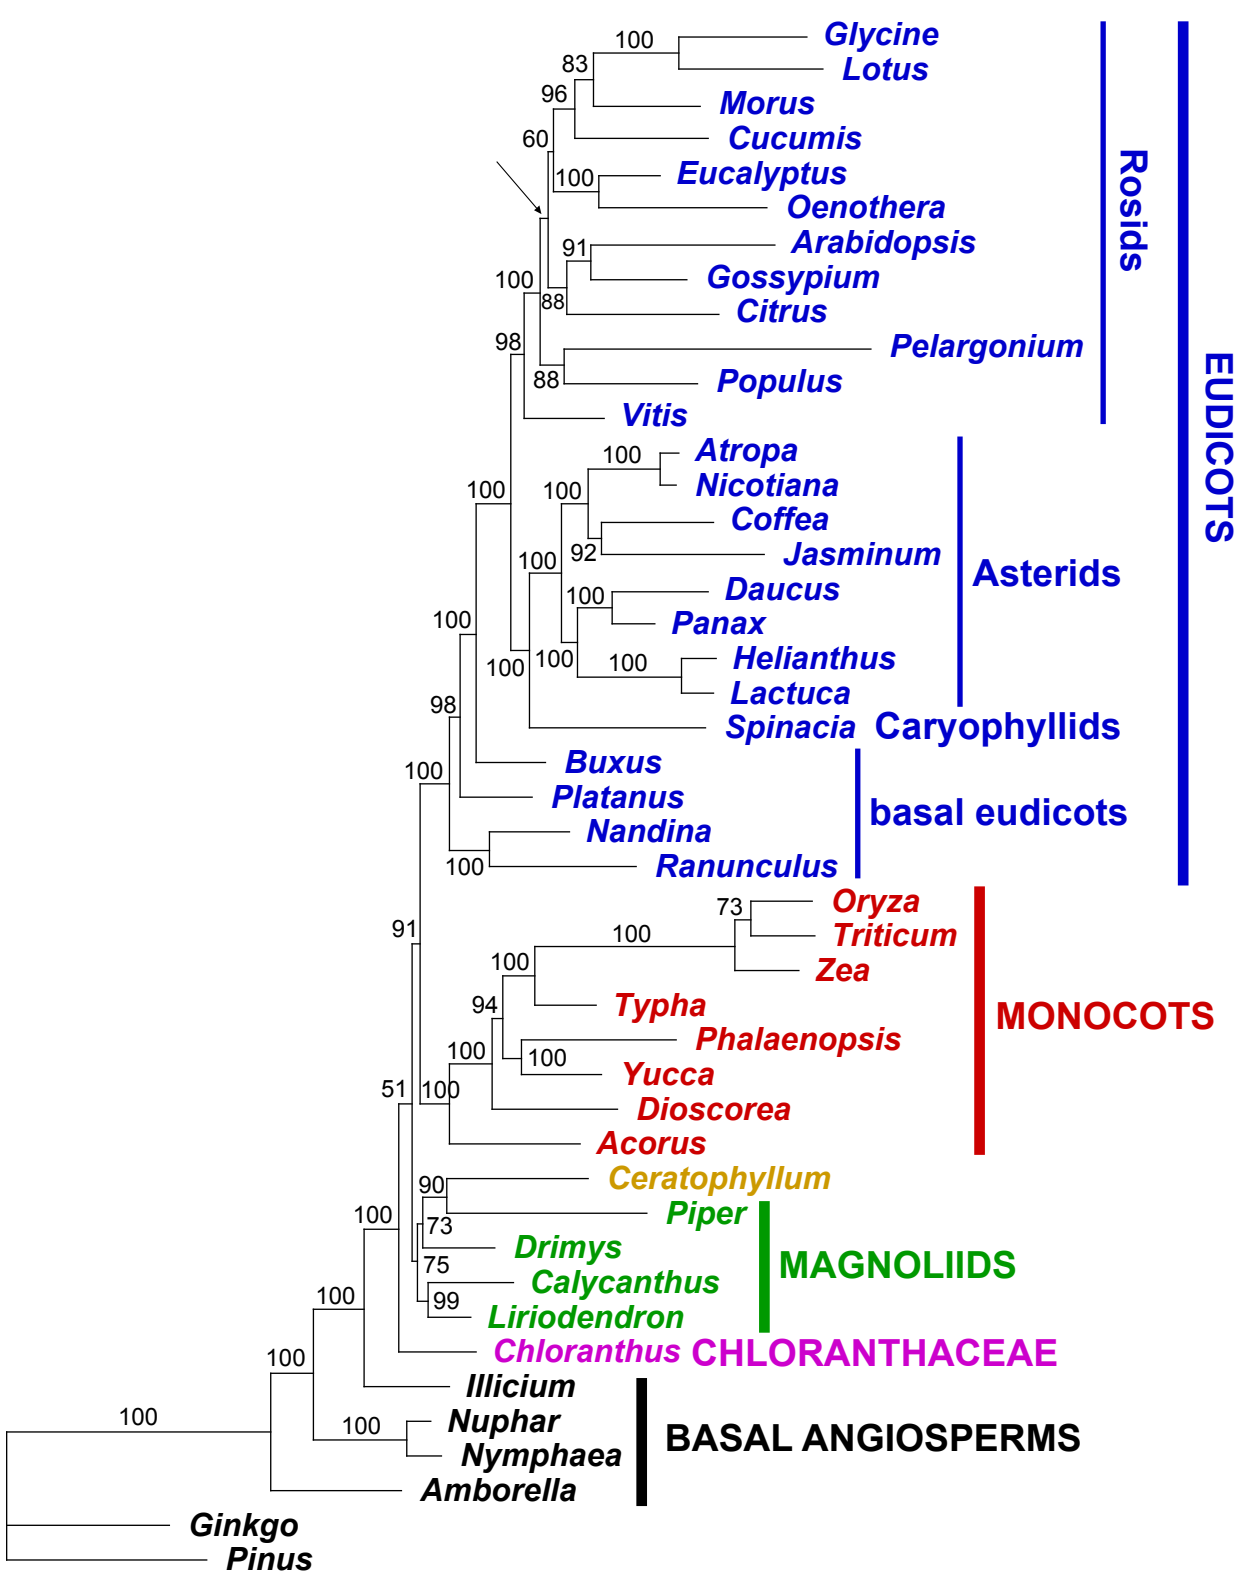

— 500 changes

Supplement: 0708072104_6.pdf [file 0708072104_6.pdf]

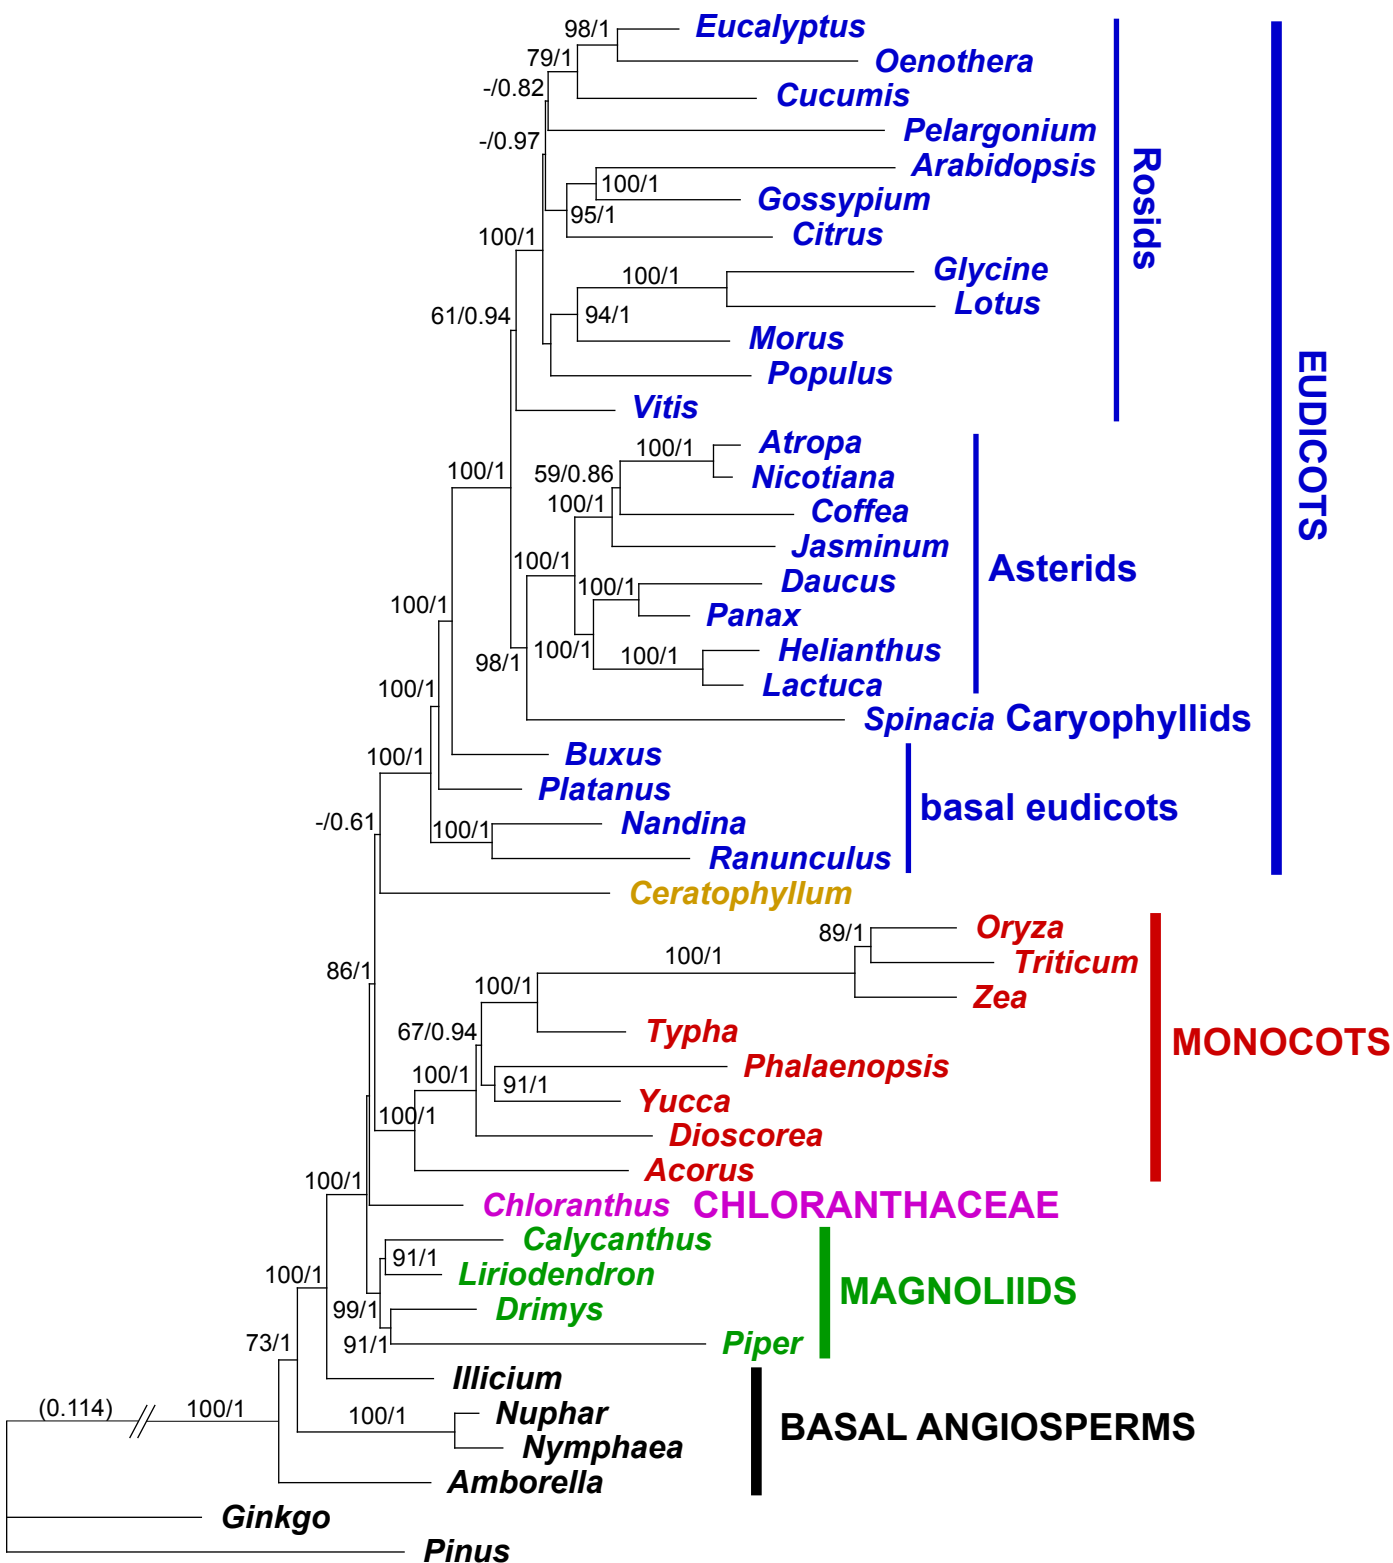

— 0.01 substitutions/site

Supplement: 0708072104_7.pdf [file 0708072104_7.pdf]

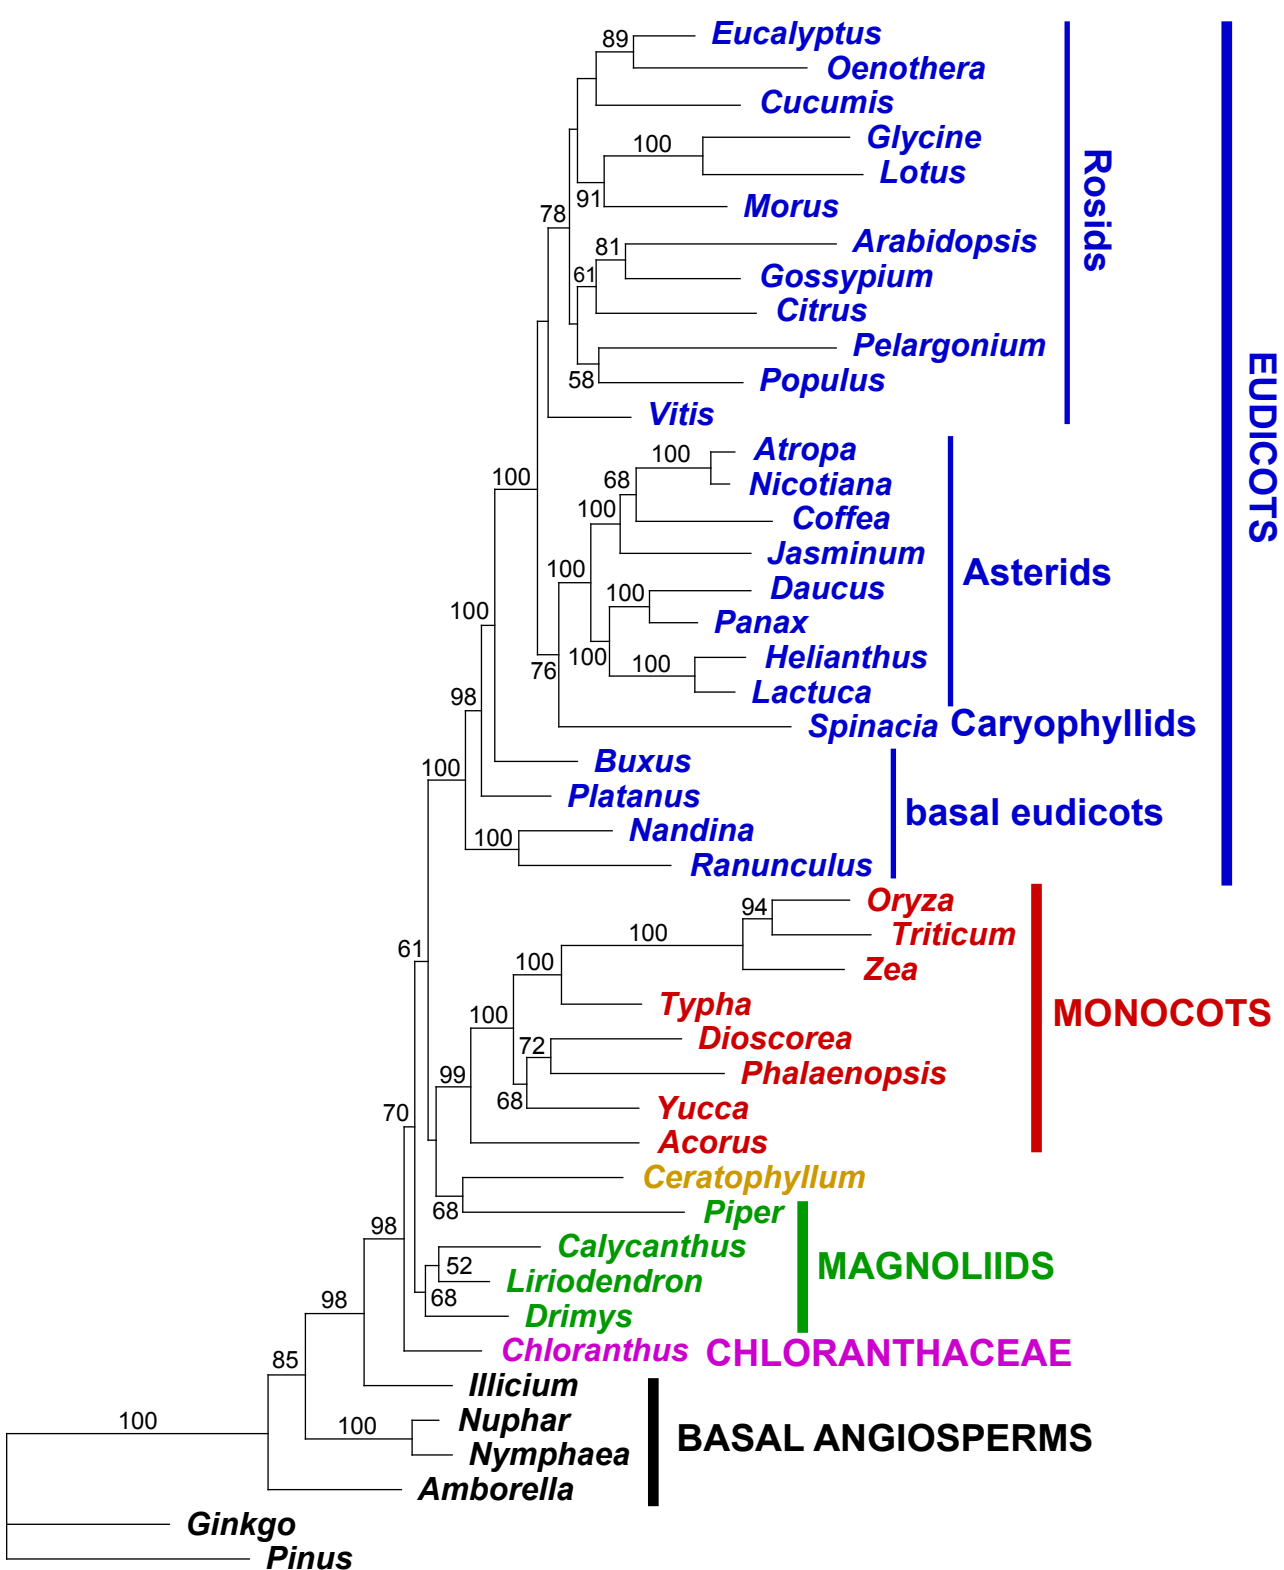

Supplement: 0708072104_8.pdf [file 0708072104_8.pdf]

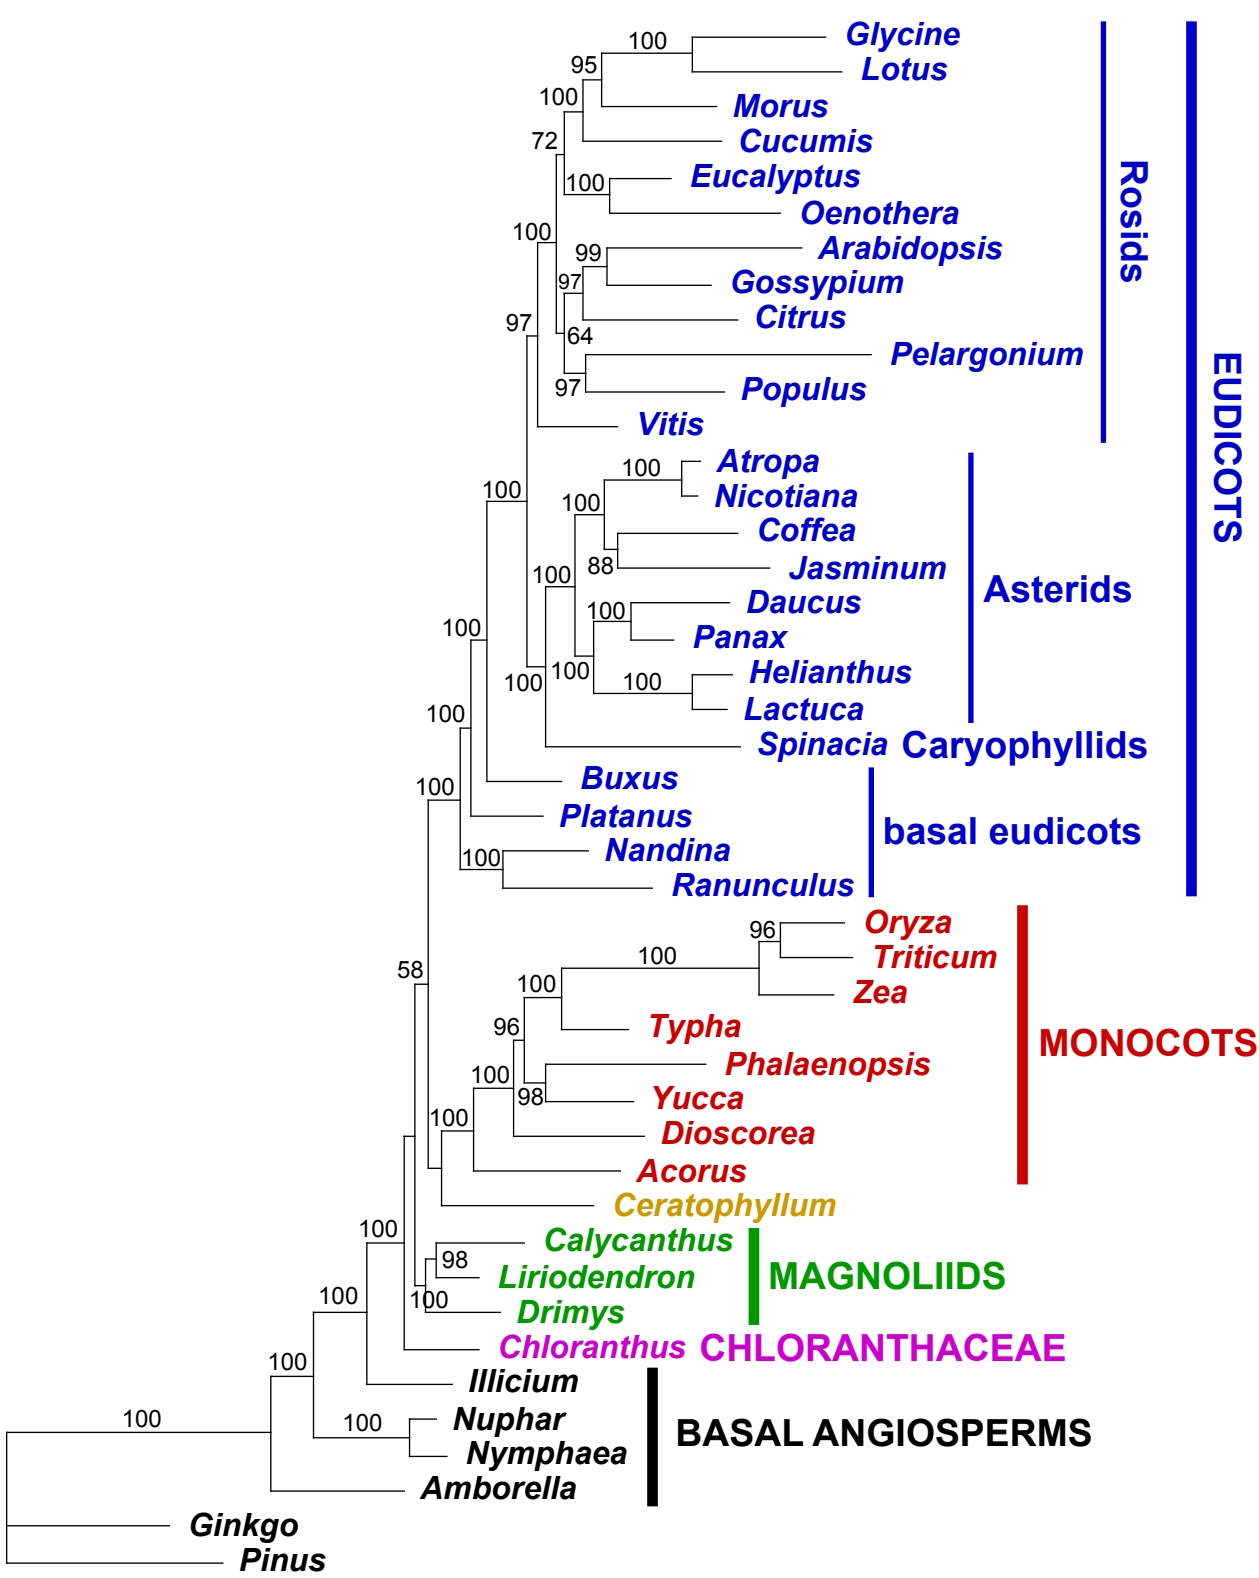

— 500 changes

Supplement: 0708072104_9.pdf [file 0708072104_9.pdf]
